# Supplementary material for: Clinical Relevance and Tumor Growth Suppression of Mitochondrial ROS Regulators along NADH:Ubiquinone Oxidoreductase Subunit B3 in Thyroid Cancer
Source: Hindawi journal article supplement (doi:10.1155/2022/8038857), 2022-01-01
Supplement: f2 [file 8038857.f2.zip]

| rownames(datas) | Type      | values     | times      | status |
|-----------------|-----------|------------|------------|--------|
| TCGA-DE-A4MD-06 | G1(n=162) | 7.97139278 | 0.73150685 | 1      |
| TCGA-EM-A2P1-06 | G1(n=162) | 6.90678153 | 0.99452055 | 1      |
| TCGA-EM-A3SU-06 | G1(n=162) | 7.68570632 | 2.49589041 | 0      |
| TCGA-4C-A93U-01 | G1(n=162) | 8.00555675 | 0.35342466 | 0      |
| TCGA-BJ-A0Z5-01 | G1(n=162) | 7.71498331 | 1.22739726 | 0      |
| TCGA-BJ-A0Z9-01 | G1(n=162) | 6.75896298 | 3.44383562 | 0      |
| TCGA-BJ-A0ZB-01 | G1(n=162) | 7.12461719 | 0.33424658 | 0      |
| TCGA-BJ-A0ZH-01 | G1(n=162) | 7.78365472 | 1.26027397 | 0      |
| TCGA-BJ-A18Z-01 | G1(n=162) | 7.53251254 | 3.46027397 | 0      |
| TCGA-BJ-A28R-01 | G1(n=162) | 7.40879496 | 3.51232877 | 0      |
| TCGA-BJ-A28T-01 | G1(n=162) | 6.84891776 | 2.96164384 | 0      |
| TCGA-BJ-A28X-01 | G1(n=162) | 7.0393964  | 1.35342466 | 1      |
| TCGA-BJ-A28Z-01 | G1(n=162) | 7.3692515  | 0.92328767 | 0      |
| TCGA-BJ-A2NA-01 | G1(n=162) | 7.67778853 | 0.34794521 | 1      |
| TCGA-BJ-A3EZ-01 | G1(n=162) | 7.64538215 | 1.33424658 | 0      |
| TCGA-BJ-A3PR-01 | G1(n=162) | 7.82273728 | 3.03287671 | 0      |
| TCGA-BJ-A45E-01 | G1(n=162) | 6.70895883 | 1.75068493 | 0      |
| TCGA-BJ-A45I-01 | G1(n=162) | 7.73688728 | 0.30136986 | 1      |
| TCGA-BJ-A4O8-01 | G1(n=162) | 7.64090231 | 1.61917808 | 0      |
| TCGA-DE-A0Y2-01 | G1(n=162) | 6.83932625 | 1.80273973 | 0      |
| TCGA-DE-A0Y3-01 | G1(n=162) | 6.84353145 | 0.08219178 | 1      |
| TCGA-DE-A4M8-01 | G1(n=162) | 7.32187188 | 1.54520548 | 0      |
| TCGA-DE-A4MB-01 | G1(n=162) | 7.61106944 | 0.96438356 | 0      |
| TCGA-DE-A4MC-01 | G1(n=162) | 7.66740185 | 0.90958904 | 1      |
| TCGA-DE-A4MD-01 | G1(n=162) | 7.22643428 | 0.73150685 | 1      |
| TCGA-DE-A7U5-01 | G1(n=162) | 7.41197319 | 0.23013699 | 0      |
| TCGA-DJ-A13L-01 | G1(n=162) | 8.09047274 | 0.83013699 | 0      |
| TCGA-DJ-A13R-01 | G1(n=162) | 7.21991168 | 1.54794521 | 0      |
| TCGA-DJ-A13U-01 | G1(n=162) | 6.87962385 | 4.35616438 | 0      |
| TCGA-DJ-A13W-01 | G1(n=162) | 7.11955536 | 4.36438356 | 0      |
| TCGA-DJ-A1QD-01 | G1(n=162) | 7.19918587 | 4.00547945 | 0      |
| TCGA-DJ-A1QE-01 | G1(n=162) | 7.27383615 | 11.3260274 | 0      |
| TCGA-DJ-A1QF-01 | G1(n=162) | 7.02833557 | 2.55068493 | 0      |
| TCGA-DJ-A1QG-01 | G1(n=162) | 7.21523712 | 3.74794521 | 0      |
| TCGA-DJ-A1QO-01 | G1(n=162) | 7.46352211 | 2.90958904 | 1      |
| TCGA-DJ-A1QQ-01 | G1(n=162) | 7.29678151 | 1.4630137  | 0      |
| TCGA-DJ-A2PO-01 | G1(n=162) | 7.35525805 | 0.66575342 | 0      |
| TCGA-DJ-A2PR-01 | G1(n=162) | 7.25500755 | 2.28767123 | 0      |
| TCGA-DJ-A2PV-01 | G1(n=162) | 7.2222617  | 2.66575342 | 0      |

|                 |           |            |            |   |
|-----------------|-----------|------------|------------|---|
| TCGA-DJ-A2PY-01 | G1(n=162) | 7.27711998 | 0.73150685 | 0 |
| TCGA-DJ-A2PZ-01 | G1(n=162) | 7.35714437 | 0.70136986 | 0 |
| TCGA-DJ-A2Q1-01 | G1(n=162) | 7.85413005 | 3.14520548 | 0 |
| TCGA-DJ-A2Q3-01 | G1(n=162) | 7.28735649 | 1.05479452 | 1 |
| TCGA-DJ-A2Q4-01 | G1(n=162) | 7.67955578 | 2.82739726 | 0 |
| TCGA-DJ-A2Q9-01 | G1(n=162) | 7.11722503 | 2.99178082 | 0 |
| TCGA-DJ-A3UQ-01 | G1(n=162) | 7.72105457 | 1.63013699 | 0 |
| TCGA-DJ-A3UW-01 | G1(n=162) | 7.56143037 | 4.96438356 | 0 |
| TCGA-DJ-A3UY-01 | G1(n=162) | 7.29353756 | 2.9890411  | 0 |
| TCGA-DJ-A3V5-01 | G1(n=162) | 7.50630364 | 1.6        | 0 |
| TCGA-DJ-A3V6-01 | G1(n=162) | 7.9080497  | 2.24109589 | 0 |
| TCGA-DJ-A3VB-01 | G1(n=162) | 8.21521516 | 1.90958904 | 0 |
| TCGA-DJ-A3VD-01 | G1(n=162) | 7.21008251 | 3.39178082 | 0 |
| TCGA-DJ-A3VE-01 | G1(n=162) | 7.38736889 | 1.58082192 | 0 |
| TCGA-DJ-A3VF-01 | G1(n=162) | 7.20609951 | 0.8        | 0 |
| TCGA-DJ-A3VI-01 | G1(n=162) | 7.77223867 | 0.26027397 | 0 |
| TCGA-DJ-A4UT-01 | G1(n=162) | 7.86200584 | 2.25479452 | 0 |
| TCGA-DJ-A4V2-01 | G1(n=162) | 7.55457594 | 0.26027397 | 0 |
| TCGA-DJ-A4V4-01 | G1(n=162) | 7.798992   | 1.31780822 | 0 |
| TCGA-DO-A1K0-01 | G1(n=162) | 6.81117896 | 1.58082192 | 1 |
| TCGA-DO-A2HM-01 | G1(n=162) | 7.43650621 | 0.19452055 | 0 |
| TCGA-E8-A242-01 | G1(n=162) | 7.58930696 | 2.60273973 | 0 |
| TCGA-E8-A2EA-01 | G1(n=162) | 7.89293319 | 2.97260274 | 0 |
| TCGA-E8-A2JQ-01 | G1(n=162) | 7.5956286  | 0.97534247 | 0 |
| TCGA-E8-A413-01 | G1(n=162) | 7.55835207 | 2.49863014 | 0 |
| TCGA-E8-A414-01 | G1(n=162) | 7.30157654 | 2.62465753 | 0 |
| TCGA-E8-A417-01 | G1(n=162) | 7.25972818 | 2.56986301 | 0 |
| TCGA-E8-A419-01 | G1(n=162) | 7.55111029 | 2.12054795 | 0 |
| TCGA-E8-A436-01 | G1(n=162) | 7.4383603  | 1.24657534 | 0 |
| TCGA-E8-A44K-01 | G1(n=162) | 7.19823403 | 2.58356164 | 0 |
| TCGA-EL-A3CM-01 | G1(n=162) | 6.9375393  | 2.22739726 | 0 |
| TCGA-EL-A3CN-01 | G1(n=162) | 7.13452532 | 12.9616438 | 0 |
| TCGA-EL-A3CO-01 | G1(n=162) | 6.96164772 | 8.14520548 | 0 |
| TCGA-EL-A3CS-01 | G1(n=162) | 7.02673998 | 3.79452055 | 1 |
| TCGA-EL-A3CT-01 | G1(n=162) | 6.92659603 | 5.07945205 | 0 |
| TCGA-EL-A3CU-01 | G1(n=162) | 6.98796812 | 13.0958904 | 0 |
| TCGA-EL-A3CV-01 | G1(n=162) | 6.86112121 | 3.16164384 | 0 |
| TCGA-EL-A3CY-01 | G1(n=162) | 6.86333994 | 0.34794521 | 0 |
| TCGA-EL-A3D0-01 | G1(n=162) | 7.37738319 | 11.6547945 | 0 |
| TCGA-EL-A3D6-01 | G1(n=162) | 7.34742755 | 9.03013699 | 0 |

|                 |           |            |            |   |
|-----------------|-----------|------------|------------|---|
| TCGA-EL-A3GO-01 | G1(n=162) | 6.70923196 | 0.01643836 | 1 |
| TCGA-EL-A3GP-01 | G1(n=162) | 7.36167173 | 4.1260274  | 0 |
| TCGA-EL-A3GQ-01 | G1(n=162) | 6.74001227 | 4.18630137 | 0 |
| TCGA-EL-A3GR-01 | G1(n=162) | 7.46357412 | 9.59178082 | 0 |
| TCGA-EL-A3GS-01 | G1(n=162) | 7.48521704 | 5.44931507 | 0 |
| TCGA-EL-A3GU-01 | G1(n=162) | 7.742693   | 1.49041096 | 1 |
| TCGA-EL-A3GV-01 | G1(n=162) | 7.79134809 | 4.19726027 | 0 |
| TCGA-EL-A3GX-01 | G1(n=162) | 7.61594873 | 1.20273973 | 1 |
| TCGA-EL-A3GY-01 | G1(n=162) | 7.59849773 | 8.42739726 | 0 |
| TCGA-EL-A3H4-01 | G1(n=162) | 6.92900675 | 4.14246575 | 0 |
| TCGA-EL-A3H5-01 | G1(n=162) | 6.24683317 | 6.96438356 | 0 |
| TCGA-EL-A3H7-01 | G1(n=162) | 7.51001664 | 11.5835616 | 0 |
| TCGA-EL-A3MY-01 | G1(n=162) | 7.67196978 | 1.46027397 | 1 |
| TCGA-EL-A3MZ-01 | G1(n=162) | 8.14185033 | 4.37534247 | 0 |
| TCGA-EL-A3N2-01 | G1(n=162) | 7.31431702 | 2.47123288 | 0 |
| TCGA-EL-A3N3-01 | G1(n=162) | 7.20828607 | 14.8575342 | 0 |
| TCGA-EL-A3T1-01 | G1(n=162) | 7.67448954 | 10.7972603 | 0 |
| TCGA-EL-A3T3-01 | G1(n=162) | 7.85776238 | 11.0054795 | 0 |
| TCGA-EL-A3T6-01 | G1(n=162) | 7.25920071 | 8.18630137 | 0 |
| TCGA-EL-A3T9-01 | G1(n=162) | 8.68079391 | 0.47671233 | 1 |
| TCGA-EL-A3ZK-01 | G1(n=162) | 7.28207261 | 4.31506849 | 0 |
| TCGA-EL-A3ZO-01 | G1(n=162) | 8.22336752 | 6.05753425 | 0 |
| TCGA-EL-A3ZT-01 | G1(n=162) | 7.72658687 | 4.95342466 | 0 |
| TCGA-EL-A4JW-01 | G1(n=162) | 7.39579401 | 2.89315068 | 0 |
| TCGA-EL-A4JX-01 | G1(n=162) | 6.89225986 | 3.83013699 | 0 |
| TCGA-EL-A4K1-01 | G1(n=162) | 7.48230568 | 2.86575342 | 0 |
| TCGA-EL-A4K4-01 | G1(n=162) | 7.50571759 | 4.44657534 | 0 |
| TCGA-EM-A1CT-01 | G1(n=162) | 6.5936289  | 1.51506849 | 0 |
| TCGA-EM-A22I-01 | G1(n=162) | 7.03857291 | 1.22739726 | 0 |
| TCGA-EM-A22M-01 | G1(n=162) | 8.31999462 | 1.2109589  | 0 |
| TCGA-EM-A2CP-01 | G1(n=162) | 6.86999418 | 0.24931507 | 0 |
| TCGA-EM-A2P1-01 | G1(n=162) | 6.60105434 | 0.99452055 | 1 |
| TCGA-EM-A3FK-01 | G1(n=162) | 7.81742533 | 1.98082192 | 0 |
| TCGA-EM-A3FM-01 | G1(n=162) | 8.21824222 | 1.40821918 | 1 |
| TCGA-EM-A3O3-01 | G1(n=162) | 8.75736922 | 1.20821918 | 0 |
| TCGA-EM-A3SZ-01 | G1(n=162) | 7.82349972 | 1.06575342 | 0 |
| TCGA-EM-A4FF-01 | G1(n=162) | 7.52864028 | 4.89041096 | 1 |
| TCGA-EM-A4FM-01 | G1(n=162) | 7.87453268 | 0.44383562 | 0 |
| TCGA-EM-A4FQ-01 | G1(n=162) | 7.95663021 | 1.87123288 | 0 |
| TCGA-ET-A25G-01 | G1(n=162) | 7.48636722 | 6.82739726 | 0 |

|                 |           |            |            |   |
|-----------------|-----------|------------|------------|---|
| TCGA-ET-A25L-01 | G1(n=162) | 7.77916183 | 4.71506849 | 0 |
| TCGA-ET-A25N-01 | G1(n=162) | 7.14358958 | 5.28219178 | 0 |
| TCGA-ET-A25R-01 | G1(n=162) | 7.1846901  | 5.28767123 | 0 |
| TCGA-ET-A39O-01 | G1(n=162) | 7.49133644 | 8.38082192 | 0 |
| TCGA-ET-A3BN-01 | G1(n=162) | 7.00175739 | 2.35342466 | 0 |
| TCGA-ET-A3BO-01 | G1(n=162) | 7.15027493 | 4.2        | 0 |
| TCGA-ET-A3BS-01 | G1(n=162) | 7.4575401  | 0.48219178 | 0 |
| TCGA-ET-A3BV-01 | G1(n=162) | 7.96529576 | 3.29863014 | 1 |
| TCGA-ET-A3BX-01 | G1(n=162) | 7.30822849 | 4.37260274 | 0 |
| TCGA-ET-A3DO-01 | G1(n=162) | 7.2402381  | 1.56164384 | 1 |
| TCGA-ET-A3DU-01 | G1(n=162) | 7.67731515 | 5.23561644 | 0 |
| TCGA-ET-A3DW-01 | G1(n=162) | 7.55751058 | 2.06027397 | 0 |
| TCGA-ET-A40Q-01 | G1(n=162) | 7.89796298 | 0.59726027 | 1 |
| TCGA-FE-A22Z-01 | G1(n=162) | 7.54861387 | 3.32876712 | 1 |
| TCGA-FE-A230-01 | G1(n=162) | 6.94627615 | 1.44109589 | 1 |
| TCGA-FE-A233-01 | G1(n=162) | 7.13220083 | 1.55342466 | 1 |
| TCGA-FE-A234-01 | G1(n=162) | 7.86216136 | 1.32328767 | 1 |
| TCGA-FE-A23A-01 | G1(n=162) | 7.35992254 | 6.81917808 | 0 |
| TCGA-FE-A3PB-01 | G1(n=162) | 7.89902971 | 7.09589041 | 0 |
| TCGA-FY-A3BL-01 | G1(n=162) | 7.37882732 | 1.70136986 | 0 |
| TCGA-FY-A3NN-01 | G1(n=162) | 7.92072658 | 0          | 0 |
| TCGA-FY-A3R8-01 | G1(n=162) | 7.88250467 | 1.30684932 | 0 |
| TCGA-FY-A3TY-01 | G1(n=162) | 7.64190634 | 1.94246575 | 0 |
| TCGA-FY-A3YR-01 | G1(n=162) | 7.56525871 | 1.44657534 | 0 |
| TCGA-FY-A40L-01 | G1(n=162) | 7.53285578 | 1.9890411  | 0 |
| TCGA-FY-A4B3-01 | G1(n=162) | 7.66607932 | 1.16986301 | 0 |
| TCGA-H2-A26U-01 | G1(n=162) | 7.62689604 | 1.41643836 | 0 |
| TCGA-H2-A421-01 | G1(n=162) | 7.82201263 | 1.67123288 | 0 |
| TCGA-H2-A422-01 | G1(n=162) | 7.00405816 | 1.55068493 | 0 |
| TCGA-IM-A3EB-01 | G1(n=162) | 7.88792929 | 4.07671233 | 0 |
| TCGA-IM-A3ED-01 | G1(n=162) | 7.10967184 | 3.95068493 | 0 |
| TCGA-IM-A3U2-01 | G1(n=162) | 7.9885698  | 1.54246575 | 0 |
| TCGA-IM-A420-01 | G1(n=162) | 7.40692012 | 0.68493151 | 0 |
| TCGA-IM-A4EB-01 | G1(n=162) | 7.77065624 | 2.1369863  | 0 |
| TCGA-J8-A3O1-01 | G1(n=162) | 7.2231621  | 2.26575342 | 0 |
| TCGA-J8-A3YF-01 | G1(n=162) | 7.92569445 | 2.05753425 | 0 |
| TCGA-J8-A3YG-01 | G1(n=162) | 7.5176005  | 1.85753425 | 0 |
| TCGA-KS-A41I-01 | G1(n=162) | 7.74502773 | 1.33150685 | 0 |
| TCGA-KS-A4I9-01 | G1(n=162) | 7.70695478 | 7.28219178 | 0 |
| TCGA-KS-A4IB-01 | G1(n=162) | 7.7054898  | 7.06027397 | 0 |

|                 |           |            |            |   |
|-----------------|-----------|------------|------------|---|
| TCGA-KS-A4ID-01 | G1(n=162) | 7.58813183 | 2.76986301 | 0 |
| TCGA-L6-A4EU-01 | G1(n=162) | 8.21164025 | 0.79178082 | 0 |
| TCGA-MK-A4N6-01 | G1(n=162) | 7.43922178 | 3.00821918 | 0 |
| TCGA-EM-A2CS-06 | G2(n=261) | 8.51931387 | 2.30410959 | 0 |
| TCGA-J8-A3O2-06 | G2(n=261) | 8.00126025 | 0.9369863  | 0 |
| TCGA-J8-A3YH-06 | G2(n=261) | 8.35713986 | 0.47945205 | 0 |
| TCGA-J8-A4HW-06 | G2(n=261) | 7.78110773 | 0.21643836 | 0 |
| TCGA-BJ-A0Z0-01 | G2(n=261) | 7.58806415 | 1.14794521 | 0 |
| TCGA-BJ-A0Z2-01 | G2(n=261) | 7.93886571 | 0.43287671 | 1 |
| TCGA-BJ-A0Z3-01 | G2(n=261) | 7.87365213 | 1.36164384 | 0 |
| TCGA-BJ-A0ZA-01 | G2(n=261) | 7.35309463 | 1.57260274 | 0 |
| TCGA-BJ-A0ZC-01 | G2(n=261) | 7.25033556 | 0.96438356 | 0 |
| TCGA-BJ-A0ZE-01 | G2(n=261) | 7.80219678 | 1.39452055 | 0 |
| TCGA-BJ-A0ZG-01 | G2(n=261) | 7.36182797 | 2.12328767 | 0 |
| TCGA-BJ-A0ZJ-01 | G2(n=261) | 7.72712961 | 3.50684932 | 0 |
| TCGA-BJ-A18Y-01 | G2(n=261) | 7.83709507 | 4.28219178 | 0 |
| TCGA-BJ-A190-01 | G2(n=261) | 7.23724922 | 1.71506849 | 0 |
| TCGA-BJ-A191-01 | G2(n=261) | 7.753194   | 0.40273973 | 0 |
| TCGA-BJ-A28S-01 | G2(n=261) | 7.82704693 | 1.75342466 | 0 |
| TCGA-BJ-A290-01 | G2(n=261) | 8.17915563 | 0.90136986 | 1 |
| TCGA-BJ-A2N7-01 | G2(n=261) | 7.6980198  | 1.53150685 | 0 |
| TCGA-BJ-A45C-01 | G2(n=261) | 8.17787181 | 0.66575342 | 1 |
| TCGA-BJ-A45F-01 | G2(n=261) | 7.20316074 | 0.28767123 | 0 |
| TCGA-BJ-A45G-01 | G2(n=261) | 7.99230869 | 1.98630137 | 0 |
| TCGA-BJ-A45H-01 | G2(n=261) | 8.10590274 | 2.36986301 | 0 |
| TCGA-BJ-A45J-01 | G2(n=261) | 8.37112754 | 1.80273973 | 0 |
| TCGA-BJ-A4O9-01 | G2(n=261) | 7.91426207 | 1.95616438 | 0 |
| TCGA-CE-A13K-01 | G2(n=261) | 8.00725404 | 1.05479452 | 0 |
| TCGA-CE-A27D-01 | G2(n=261) | 7.9555186  | 1.02465753 | 0 |
| TCGA-CE-A3ME-01 | G2(n=261) | 7.62463979 | 1.03835616 | 0 |
| TCGA-CE-A481-01 | G2(n=261) | 8.04823704 | 0.94794521 | 0 |
| TCGA-CE-A482-01 | G2(n=261) | 8.15885117 | 0.89041096 | 0 |
| TCGA-CE-A483-01 | G2(n=261) | 7.48463168 | 1.25205479 | 0 |
| TCGA-CE-A485-01 | G2(n=261) | 7.62164541 | 1.05479452 | 0 |
| TCGA-DE-A0XZ-01 | G2(n=261) | 7.64427239 | 0.55890411 | 1 |
| TCGA-DE-A3KN-01 | G2(n=261) | 8.31572803 | 2.27671233 | 0 |
| TCGA-DE-A4M9-01 | G2(n=261) | 7.86908461 | 1.56986301 | 0 |
| TCGA-DE-A69J-01 | G2(n=261) | 8.23067424 | 1.22465753 | 0 |
| TCGA-DE-A69K-01 | G2(n=261) | 8.41334111 | 1.1890411  | 1 |
| TCGA-DJ-A13O-01 | G2(n=261) | 7.85768043 | 3.18082192 | 0 |

|                 |           |            |            |   |
|-----------------|-----------|------------|------------|---|
| TCGA-DJ-A13P-01 | G2(n=261) | 8.00463295 | 14.109589  | 0 |
| TCGA-DJ-A13S-01 | G2(n=261) | 7.5080284  | 0.7260274  | 0 |
| TCGA-DJ-A13T-01 | G2(n=261) | 7.74616723 | 4.68219178 | 0 |
| TCGA-DJ-A13V-01 | G2(n=261) | 7.59068599 | 3.59726027 | 0 |
| TCGA-DJ-A13X-01 | G2(n=261) | 7.63814494 | 0.69315068 | 0 |
| TCGA-DJ-A1QH-01 | G2(n=261) | 7.69933523 | 3.54246575 | 0 |
| TCGA-DJ-A1QI-01 | G2(n=261) | 8.01449262 | 1.24657534 | 0 |
| TCGA-DJ-A1QM-01 | G2(n=261) | 7.29373697 | 0.50136986 | 0 |
| TCGA-DJ-A1QN-01 | G2(n=261) | 8.3318972  | 3.54794521 | 0 |
| TCGA-DJ-A2PN-01 | G2(n=261) | 7.40790708 | 0.84109589 | 0 |
| TCGA-DJ-A2PP-01 | G2(n=261) | 7.13954713 | 2.54794521 | 0 |
| TCGA-DJ-A2PQ-01 | G2(n=261) | 8.00451008 | 2.95068493 | 0 |
| TCGA-DJ-A2PS-01 | G2(n=261) | 7.52706277 | 2.18356164 | 0 |
| TCGA-DJ-A2PU-01 | G2(n=261) | 7.72924608 | 2.83013699 | 0 |
| TCGA-DJ-A2PW-01 | G2(n=261) | 7.63766355 | 2.90410959 | 0 |
| TCGA-DJ-A2PX-01 | G2(n=261) | 7.69840268 | 2.41369863 | 0 |
| TCGA-DJ-A2Q0-01 | G2(n=261) | 7.11171374 | 2.8630137  | 0 |
| TCGA-DJ-A2Q2-01 | G2(n=261) | 7.86160899 | 3.6630137  | 0 |
| TCGA-DJ-A2Q5-01 | G2(n=261) | 7.56467254 | 3.12328767 | 0 |
| TCGA-DJ-A2Q6-01 | G2(n=261) | 7.41913472 | 3.03835616 | 0 |
| TCGA-DJ-A2Q7-01 | G2(n=261) | 8.12854165 | 2.9260274  | 0 |
| TCGA-DJ-A2QB-01 | G2(n=261) | 7.249125   | 2.93150685 | 0 |
| TCGA-DJ-A3UK-01 | G2(n=261) | 7.84581518 | 3.07671233 | 0 |
| TCGA-DJ-A3UM-01 | G2(n=261) | 7.73988661 | 2.58630137 | 0 |
| TCGA-DJ-A3UN-01 | G2(n=261) | 8.15490421 | 2.70136986 | 0 |
| TCGA-DJ-A3UO-01 | G2(n=261) | 8.18918968 | 1.75616438 | 1 |
| TCGA-DJ-A3UP-01 | G2(n=261) | 8.13877236 | 1.36712329 | 0 |
| TCGA-DJ-A3UR-01 | G2(n=261) | 8.31232365 | 3.02739726 | 0 |
| TCGA-DJ-A3US-01 | G2(n=261) | 7.79883436 | 2.73424658 | 0 |
| TCGA-DJ-A3UU-01 | G2(n=261) | 7.73136367 | 1.95342466 | 0 |
| TCGA-DJ-A3UV-01 | G2(n=261) | 8.09630772 | 4.01643836 | 0 |
| TCGA-DJ-A3UX-01 | G2(n=261) | 7.56810358 | 0.94520548 | 0 |
| TCGA-DJ-A3UZ-01 | G2(n=261) | 7.8598256  | 3.41369863 | 0 |
| TCGA-DJ-A3V0-01 | G2(n=261) | 8.07023425 | 3.08219178 | 0 |
| TCGA-DJ-A3V2-01 | G2(n=261) | 8.19008225 | 1.68493151 | 0 |
| TCGA-DJ-A3V3-01 | G2(n=261) | 8.29850701 | 2.55068493 | 0 |
| TCGA-DJ-A3V4-01 | G2(n=261) | 7.6054934  | 3.54520548 | 0 |
| TCGA-DJ-A3V7-01 | G2(n=261) | 8.18901002 | 1.93424658 | 0 |
| TCGA-DJ-A3V8-01 | G2(n=261) | 8.0282521  | 1.77260274 | 0 |
| TCGA-DJ-A3V9-01 | G2(n=261) | 7.93578493 | 1.70684932 | 0 |

|                 |           |            |            |   |
|-----------------|-----------|------------|------------|---|
| TCGA-DJ-A3VA-01 | G2(n=261) | 8.02440924 | 2.06849315 | 0 |
| TCGA-DJ-A3VJ-01 | G2(n=261) | 8.53599618 | 3.03561644 | 0 |
| TCGA-DJ-A3VM-01 | G2(n=261) | 7.30933567 | 2.30136986 | 0 |
| TCGA-DJ-A4UP-01 | G2(n=261) | 8.10978716 | 2.50958904 | 0 |
| TCGA-DJ-A4UQ-01 | G2(n=261) | 7.94472676 | 2.75342466 | 0 |
| TCGA-DJ-A4UR-01 | G2(n=261) | 8.35007042 | 0.30958904 | 1 |
| TCGA-DJ-A4UW-01 | G2(n=261) | 8.08232424 | 2.24383562 | 0 |
| TCGA-DJ-A4V0-01 | G2(n=261) | 7.27011852 | 2.96164384 | 0 |
| TCGA-DJ-A4V5-01 | G2(n=261) | 8.12895091 | 2.94794521 | 0 |
| TCGA-DO-A1JZ-01 | G2(n=261) | 7.45816499 | 4.57534247 | 0 |
| TCGA-E3-A3DY-01 | G2(n=261) | 7.75223661 | 7.71232877 | 0 |
| TCGA-E3-A3DZ-01 | G2(n=261) | 7.90786206 | 3.93424658 | 0 |
| TCGA-E3-A3E0-01 | G2(n=261) | 8.3289763  | 5.53150685 | 0 |
| TCGA-E3-A3E1-01 | G2(n=261) | 7.73210997 | 6.70958904 | 0 |
| TCGA-E3-A3E2-01 | G2(n=261) | 8.3690707  | 5.26575342 | 0 |
| TCGA-E3-A3E3-01 | G2(n=261) | 7.53905244 | 1.21917808 | 1 |
| TCGA-E3-A3E5-01 | G2(n=261) | 8.3298843  | 3.32876712 | 0 |
| TCGA-E8-A3X7-01 | G2(n=261) | 8.19736991 | 2.60547945 | 0 |
| TCGA-E8-A415-01 | G2(n=261) | 7.82718109 | 2.58630137 | 0 |
| TCGA-E8-A416-01 | G2(n=261) | 7.72317469 | 2.60821918 | 0 |
| TCGA-E8-A418-01 | G2(n=261) | 8.58733854 | 0.25205479 | 0 |
| TCGA-E8-A434-01 | G2(n=261) | 7.81226906 | 2.6109589  | 0 |
| TCGA-E8-A437-01 | G2(n=261) | 8.19681792 | 3.32328767 | 0 |
| TCGA-E8-A438-01 | G2(n=261) | 8.93646614 | 2.79178082 | 0 |
| TCGA-E8-A44M-01 | G2(n=261) | 7.54306806 | 2.51232877 | 0 |
| TCGA-EL-A3CL-01 | G2(n=261) | 7.81033178 | 2.63835616 | 0 |
| TCGA-EL-A3CP-01 | G2(n=261) | 7.47702742 | 13.2356164 | 0 |
| TCGA-EL-A3CR-01 | G2(n=261) | 8.45722453 | 0.63835616 | 0 |
| TCGA-EL-A3CW-01 | G2(n=261) | 7.17043997 | 4.75068493 | 0 |
| TCGA-EL-A3CZ-01 | G2(n=261) | 7.02048466 | 3.90684932 | 1 |
| TCGA-EL-A3D5-01 | G2(n=261) | 7.83768734 | 4.75890411 | 0 |
| TCGA-EL-A3GW-01 | G2(n=261) | 8.20415918 | 4.18356164 | 0 |
| TCGA-EL-A3GZ-01 | G2(n=261) | 8.19696817 | 11.6657534 | 0 |
| TCGA-EL-A3H3-01 | G2(n=261) | 8.04248598 | 3.61369863 | 0 |
| TCGA-EL-A3H8-01 | G2(n=261) | 7.58006753 | 12.539726  | 0 |
| TCGA-EL-A3MW-01 | G2(n=261) | 8.07541129 | 9.05479452 | 0 |
| TCGA-EL-A3MX-01 | G2(n=261) | 9.22372167 | 4.67945205 | 1 |
| TCGA-EL-A3T0-01 | G2(n=261) | 8.04522246 | 11.8767123 | 0 |
| TCGA-EL-A3T2-01 | G2(n=261) | 7.28705461 | 2.4739726  | 1 |
| TCGA-EL-A3T7-01 | G2(n=261) | 7.80875182 | 3.44109589 | 0 |

|                 |           |            |            |   |
|-----------------|-----------|------------|------------|---|
| TCGA-EL-A3T8-01 | G2(n=261) | 7.84330516 | 8.95616438 | 0 |
| TCGA-EL-A3TA-01 | G2(n=261) | 8.36226427 | 5.57534247 | 0 |
| TCGA-EL-A3TB-01 | G2(n=261) | 8.27881254 | 6.90136986 | 0 |
| TCGA-EL-A3ZG-01 | G2(n=261) | 8.36245668 | 7.4630137  | 0 |
| TCGA-EL-A3ZH-01 | G2(n=261) | 8.10075209 | 7.59726027 | 0 |
| TCGA-EL-A3ZL-01 | G2(n=261) | 8.02692826 | 5.19178082 | 0 |
| TCGA-EL-A3ZP-01 | G2(n=261) | 8.1869435  | 5.45753425 | 0 |
| TCGA-EL-A3ZS-01 | G2(n=261) | 7.79254931 | 0.5890411  | 0 |
| TCGA-EL-A4JV-01 | G2(n=261) | 8.20117235 | 4.7890411  | 0 |
| TCGA-EL-A4JZ-01 | G2(n=261) | 8.372465   | 5.08493151 | 0 |
| TCGA-EL-A4K0-01 | G2(n=261) | 7.45433949 | 2.58630137 | 0 |
| TCGA-EL-A4K2-01 | G2(n=261) | 7.65373001 | 2.54246575 | 0 |
| TCGA-EL-A4K6-01 | G2(n=261) | 8.59316918 | 2.39452055 | 1 |
| TCGA-EL-A4K9-01 | G2(n=261) | 8.02815435 | 3.98630137 | 0 |
| TCGA-EL-A4KD-01 | G2(n=261) | 8.15415969 | 3.63287671 | 0 |
| TCGA-EL-A4KG-01 | G2(n=261) | 8.27228031 | 2.02465753 | 0 |
| TCGA-EM-A1CS-01 | G2(n=261) | 7.30661766 | 2.23835616 | 0 |
| TCGA-EM-A1CU-01 | G2(n=261) | 7.67810778 | 1.74246575 | 0 |
| TCGA-EM-A1CV-01 | G2(n=261) | 7.46651836 | 4.04109589 | 0 |
| TCGA-EM-A1CW-01 | G2(n=261) | 7.38375243 | 1.50410959 | 0 |
| TCGA-EM-A1YA-01 | G2(n=261) | 7.02289575 | 1.64931507 | 0 |
| TCGA-EM-A1YB-01 | G2(n=261) | 6.41606108 | 1.62191781 | 0 |
| TCGA-EM-A1YC-01 | G2(n=261) | 7.59202544 | 6.55068493 | 0 |
| TCGA-EM-A1YD-01 | G2(n=261) | 7.24182976 | 4.75068493 | 0 |
| TCGA-EM-A22J-01 | G2(n=261) | 6.86635998 | 1.20821918 | 0 |
| TCGA-EM-A22K-01 | G2(n=261) | 8.03464988 | 1.31232877 | 0 |
| TCGA-EM-A22L-01 | G2(n=261) | 7.77848347 | 0.87123288 | 0 |
| TCGA-EM-A22N-01 | G2(n=261) | 6.2117002  | 0.88767123 | 0 |
| TCGA-EM-A22O-01 | G2(n=261) | 7.97591198 | 3.68219178 | 0 |
| TCGA-EM-A22P-01 | G2(n=261) | 7.56346302 | 3.44109589 | 0 |
| TCGA-EM-A2CJ-01 | G2(n=261) | 7.92276106 | 3.96438356 | 0 |
| TCGA-EM-A2CK-01 | G2(n=261) | 7.98052454 | 1.49041096 | 0 |
| TCGA-EM-A2CL-01 | G2(n=261) | 7.10864342 | 1.09863014 | 0 |
| TCGA-EM-A2CM-01 | G2(n=261) | 7.36498865 | 3.43287671 | 0 |
| TCGA-EM-A2CN-01 | G2(n=261) | 8.41305171 | 1.95890411 | 0 |
| TCGA-EM-A2CO-01 | G2(n=261) | 6.90711569 | 0.50410959 | 0 |
| TCGA-EM-A2CQ-01 | G2(n=261) | 6.93993493 | 1.02465753 | 0 |
| TCGA-EM-A2CS-01 | G2(n=261) | 7.67453959 | 2.30410959 | 0 |
| TCGA-EM-A2CU-01 | G2(n=261) | 8.37729003 | 1.09589041 | 0 |
| TCGA-EM-A2OV-01 | G2(n=261) | 6.69571588 | 1.84657534 | 0 |



|                 |           |            |            |   |
|-----------------|-----------|------------|------------|---|
| TCGA-EM-A2OW-01 | G2(n=261) | 6.85347923 | 3.36164384 | 0 |
| TCGA-EM-A2OX-01 | G2(n=261) | 8.57844247 | 1.64383562 | 0 |
| TCGA-EM-A2OY-01 | G2(n=261) | 7.44305433 | 2.69315068 | 0 |
| TCGA-EM-A2OZ-01 | G2(n=261) | 7.91399597 | 2.83013699 | 0 |
| TCGA-EM-A2P0-01 | G2(n=261) | 7.67093416 | 1.46575342 | 0 |
| TCGA-EM-A2P2-01 | G2(n=261) | 8.44533432 | 1.44109589 | 0 |
| TCGA-EM-A2P3-01 | G2(n=261) | 7.84357692 | 1.21643836 | 0 |
| TCGA-EM-A3AK-01 | G2(n=261) | 7.77257658 | 1.30684932 | 0 |
| TCGA-EM-A3AN-01 | G2(n=261) | 8.36982875 | 2.75616438 | 0 |
| TCGA-EM-A3AO-01 | G2(n=261) | 7.93827866 | 3.70958904 | 0 |
| TCGA-EM-A3AP-01 | G2(n=261) | 7.69790348 | 0.69589041 | 0 |
| TCGA-EM-A3AR-01 | G2(n=261) | 7.67478215 | 3.10410959 | 0 |
| TCGA-EM-A3FJ-01 | G2(n=261) | 8.76933601 | 2.32876712 | 0 |
| TCGA-EM-A3FO-01 | G2(n=261) | 8.26200781 | 1.45753425 | 0 |
| TCGA-EM-A3FQ-01 | G2(n=261) | 8.24353111 | 1.34794521 | 0 |
| TCGA-EM-A3FR-01 | G2(n=261) | 8.19580514 | 1.25205479 | 0 |
| TCGA-EM-A3O7-01 | G2(n=261) | 8.42260231 | 0.6109589  | 0 |
| TCGA-EM-A3O8-01 | G2(n=261) | 7.92405139 | 1.04383562 | 0 |
| TCGA-EM-A3SX-01 | G2(n=261) | 7.95122949 | 2.48767123 | 0 |
| TCGA-EM-A3SY-01 | G2(n=261) | 7.4516066  | 1.1260274  | 0 |
| TCGA-EM-A4FN-01 | G2(n=261) | 8.41373358 | 2.19726027 | 0 |
| TCGA-EM-A4FO-01 | G2(n=261) | 7.88450265 | 2.19726027 | 0 |
| TCGA-EM-A4FR-01 | G2(n=261) | 8.86728625 | 1.79452055 | 0 |
| TCGA-EM-A4FU-01 | G2(n=261) | 8.02542424 | 2.13972603 | 1 |
| TCGA-EM-A4FV-01 | G2(n=261) | 7.97348374 | 2.03835616 | 0 |
| TCGA-EM-A4G1-01 | G2(n=261) | 7.59102626 | 1.13972603 | 0 |
| TCGA-ET-A25I-01 | G2(n=261) | 7.30725194 | 6.80821918 | 0 |
| TCGA-ET-A25K-01 | G2(n=261) | 7.70311759 | 5.86849315 | 0 |
| TCGA-ET-A25M-01 | G2(n=261) | 7.57031946 | 5.01643836 | 0 |
| TCGA-ET-A25O-01 | G2(n=261) | 7.63612425 | 5.44109589 | 0 |
| TCGA-ET-A25P-01 | G2(n=261) | 7.97874373 | 1.53150685 | 0 |
| TCGA-ET-A2MX-01 | G2(n=261) | 7.52654587 | 7.36712329 | 0 |
| TCGA-ET-A2MY-01 | G2(n=261) | 7.51943547 | 4.89589041 | 0 |
| TCGA-ET-A2MZ-01 | G2(n=261) | 7.79969994 | 3.10410959 | 0 |
| TCGA-ET-A2N4-01 | G2(n=261) | 8.28310199 | 0.22191781 | 0 |
| TCGA-ET-A39I-01 | G2(n=261) | 7.59033095 | 2.76986301 | 0 |
| TCGA-ET-A39J-01 | G2(n=261) | 7.65169502 | 8.84109589 | 0 |
| TCGA-ET-A39L-01 | G2(n=261) | 7.70140261 | 9.03835616 | 0 |
| TCGA-ET-A39M-01 | G2(n=261) | 8.57726397 | 7.0739726  | 0 |
| TCGA-ET-A39P-01 | G2(n=261) | 7.83602401 | 7.94520548 | 0 |

|                 |           |            |            |   |
|-----------------|-----------|------------|------------|---|
| TCGA-ET-A39R-01 | G2(n=261) | 7.89562772 | 7.84383562 | 0 |
| TCGA-ET-A39S-01 | G2(n=261) | 8.03379056 | 4.59178082 | 0 |
| TCGA-ET-A39T-01 | G2(n=261) | 7.73946219 | 8.18356164 | 0 |
| TCGA-ET-A3BP-01 | G2(n=261) | 8.2155432  | 6.59178082 | 0 |
| TCGA-ET-A3BQ-01 | G2(n=261) | 7.91447048 | 6.38630137 | 0 |
| TCGA-ET-A3BT-01 | G2(n=261) | 7.76196631 | 0.73150685 | 1 |
| TCGA-ET-A3BU-01 | G2(n=261) | 7.7068349  | 6.48493151 | 0 |
| TCGA-ET-A3BW-01 | G2(n=261) | 7.58248723 | 3.88767123 | 0 |
| TCGA-ET-A3DP-01 | G2(n=261) | 7.98808236 | 7.88219178 | 0 |
| TCGA-ET-A3DQ-01 | G2(n=261) | 7.46202386 | 7.07123288 | 0 |
| TCGA-ET-A3DR-01 | G2(n=261) | 7.53086672 | 6.71506849 | 0 |
| TCGA-ET-A3DS-01 | G2(n=261) | 7.03248334 | 5.56986301 | 0 |
| TCGA-ET-A40S-01 | G2(n=261) | 8.38703181 | 3.35068493 | 0 |
| TCGA-ET-A40T-01 | G2(n=261) | 8.20463544 | 3.12328767 | 0 |
| TCGA-ET-A4KQ-01 | G2(n=261) | 7.73531171 | 2.61643836 | 0 |
| TCGA-FE-A231-01 | G2(n=261) | 7.75834688 | 2.63287671 | 0 |
| TCGA-FE-A232-01 | G2(n=261) | 8.23144868 | 6.64109589 | 0 |
| TCGA-FE-A236-01 | G2(n=261) | 7.42024806 | 5.56438356 | 0 |
| TCGA-FE-A237-01 | G2(n=261) | 7.74433272 | 1.34794521 | 1 |
| TCGA-FE-A238-01 | G2(n=261) | 7.84800899 | 1.18082192 | 1 |
| TCGA-FE-A3PA-01 | G2(n=261) | 8.97688733 | 8.8630137  | 0 |
| TCGA-FE-A3PC-01 | G2(n=261) | 8.44179052 | 7.13972603 | 0 |
| TCGA-FK-A3S3-01 | G2(n=261) | 8.28511671 | 5.92328767 | 0 |
| TCGA-FK-A3SB-01 | G2(n=261) | 8.08402677 | 0.34246575 | 0 |
| TCGA-FK-A3SE-01 | G2(n=261) | 7.9201871  | 1.83561644 | 0 |
| TCGA-FK-A3SG-01 | G2(n=261) | 9.00762205 | 0.07671233 | 0 |
| TCGA-FK-A4UB-01 | G2(n=261) | 8.45612147 | 9.6739726  | 0 |
| TCGA-FY-A3I4-01 | G2(n=261) | 7.8006036  | 1.48493151 | 0 |
| TCGA-FY-A3I5-01 | G2(n=261) | 7.77545702 | 0.65205479 | 0 |
| TCGA-FY-A3ON-01 | G2(n=261) | 7.92851752 | 1.63013699 | 0 |
| TCGA-FY-A3R6-01 | G2(n=261) | 7.7962251  | 1.15890411 | 0 |
| TCGA-FY-A3R7-01 | G2(n=261) | 7.81535651 | 1.35616438 | 0 |
| TCGA-FY-A3R9-01 | G2(n=261) | 7.30328039 | 1.38082192 | 0 |
| TCGA-FY-A3RA-01 | G2(n=261) | 7.80927245 | 1.50684932 | 0 |
| TCGA-FY-A3W9-01 | G2(n=261) | 8.3446337  | 1.80273973 | 0 |
| TCGA-FY-A3WA-01 | G2(n=261) | 7.24458462 | 1.42191781 | 0 |
| TCGA-FY-A40K-01 | G2(n=261) | 7.59428416 | 1.2630137  | 0 |
| TCGA-FY-A40M-01 | G2(n=261) | 8.39484501 | 1.8739726  | 0 |
| TCGA-FY-A40N-01 | G2(n=261) | 8.06924261 | 1.58630137 | 0 |
| TCGA-FY-A4B4-01 | G2(n=261) | 7.80936395 | 1.8        | 0 |

|                 |           |            |            |   |
|-----------------|-----------|------------|------------|---|
| TCGA-FY-A76V-01 | G2(n=261) | 8.03998689 | 0.13972603 | 0 |
| TCGA-GE-A2C6-01 | G2(n=261) | 7.53329716 | 1.04383562 | 0 |
| TCGA-H2-A2K9-01 | G2(n=261) | 7.85915181 | 1.80547945 | 0 |
| TCGA-H2-A3RI-01 | G2(n=261) | 7.73448955 | 0.76438356 | 1 |
| TCGA-IM-A3U3-01 | G2(n=261) | 7.90573604 | 1.40821918 | 0 |
| TCGA-IM-A41Y-01 | G2(n=261) | 8.00438027 | 1.81917808 | 0 |
| TCGA-J8-A3NZ-01 | G2(n=261) | 8.14559184 | 1.43561644 | 0 |
| TCGA-J8-A3O0-01 | G2(n=261) | 8.28473221 | 3.59726027 | 0 |
| TCGA-J8-A3O2-01 | G2(n=261) | 8.08551158 | 0.9369863  | 0 |
| TCGA-J8-A3YD-01 | G2(n=261) | 7.83322271 | 2.65205479 | 0 |
| TCGA-J8-A3YE-01 | G2(n=261) | 8.19775868 | 2.32054795 | 0 |
| TCGA-J8-A3YH-01 | G2(n=261) | 8.39277737 | 0.47945205 | 0 |
| TCGA-J8-A42S-01 | G2(n=261) | 8.36597291 | 0.20547945 | 0 |
| TCGA-J8-A4HW-01 | G2(n=261) | 7.80971682 | 0.21643836 | 0 |
| TCGA-J8-A4HY-01 | G2(n=261) | 8.0887761  | 0.01643836 | 0 |
| TCGA-KS-A4I3-01 | G2(n=261) | 7.67927363 | 3.64109589 | 0 |
| TCGA-KS-A4I5-01 | G2(n=261) | 8.2130904  | 1.55342466 | 0 |
| TCGA-KS-A4I7-01 | G2(n=261) | 8.56969203 | 2.70410959 | 0 |
| TCGA-KS-A4IC-01 | G2(n=261) | 7.93355652 | 2.93972603 | 0 |
| TCGA-L6-A4EQ-01 | G2(n=261) | 8.27834997 | 3.36438356 | 0 |
| TCGA-L6-A4ET-01 | G2(n=261) | 8.28827986 | 1.81917808 | 0 |
| TCGA-MK-A4N7-01 | G2(n=261) | 7.88803946 | 2.70410959 | 0 |
| TCGA-MK-A4N9-01 | G2(n=261) | 8.08608519 | 2.51780822 | 0 |
| TCGA-QD-A8IV-01 | G2(n=261) | 7.7951833  | 1.0739726  | 0 |
| TCGA-EM-A3FQ-06 | G3(n=87)  | 9.88108249 | 1.34794521 | 0 |
| TCGA-BJ-A0YZ-01 | G3(n=87)  | 7.88843865 | 2.06575342 | 0 |
| TCGA-BJ-A0ZF-01 | G3(n=87)  | 7.9631379  | 2.01369863 | 1 |
| TCGA-BJ-A192-01 | G3(n=87)  | 7.58617969 | 3.69589041 | 0 |
| TCGA-BJ-A28V-01 | G3(n=87)  | 7.91709269 | 2.70410959 | 0 |
| TCGA-BJ-A28W-01 | G3(n=87)  | 8.61453162 | 0.94246575 | 0 |
| TCGA-BJ-A291-01 | G3(n=87)  | 8.28636172 | 1.90684932 | 0 |
| TCGA-BJ-A2N8-01 | G3(n=87)  | 8.84292437 | 1.38082192 | 0 |
| TCGA-BJ-A2N9-01 | G3(n=87)  | 8.17727831 | 0.61643836 | 1 |
| TCGA-BJ-A2P4-01 | G3(n=87)  | 9.18645331 | 1.06849315 | 0 |
| TCGA-BJ-A3F0-01 | G3(n=87)  | 8.3275551  | 1.16164384 | 0 |
| TCGA-BJ-A3PT-01 | G3(n=87)  | 8.53219942 | 1.94246575 | 0 |
| TCGA-BJ-A3PU-01 | G3(n=87)  | 8.85923695 | 0.47671233 | 1 |
| TCGA-BJ-A45D-01 | G3(n=87)  | 9.54256901 | 0.90684932 | 0 |
| TCGA-BJ-A45K-01 | G3(n=87)  | 8.43918833 | 1.93150685 | 0 |
| TCGA-CE-A3MD-01 | G3(n=87)  | 8.27194472 | 1.06575342 | 0 |

|                 |          |            |            |   |
|-----------------|----------|------------|------------|---|
| TCGA-CE-A484-01 | G3(n=87) | 8.85808361 | 1.03561644 | 0 |
| TCGA-DE-A2OL-01 | G3(n=87) | 8.08245339 | 3.1369863  | 0 |
| TCGA-DE-A4MA-01 | G3(n=87) | 9.31019792 | 2.50958904 | 0 |
| TCGA-DJ-A13M-01 | G3(n=87) | 8.98151423 | 4.06575342 | 0 |
| TCGA-DJ-A1QL-01 | G3(n=87) | 8.38169527 | 1.46575342 | 0 |
| TCGA-DJ-A2PT-01 | G3(n=87) | 8.3146671  | 3.23561644 | 0 |
| TCGA-DJ-A2QA-01 | G3(n=87) | 9.38813848 | 2.79452055 | 0 |
| TCGA-DJ-A2QC-01 | G3(n=87) | 9.12820257 | 3.32876712 | 0 |
| TCGA-DJ-A3UT-01 | G3(n=87) | 8.32227412 | 3.02739726 | 0 |
| TCGA-DJ-A3VG-01 | G3(n=87) | 8.49377178 | 2.97260274 | 0 |
| TCGA-DJ-A3VK-01 | G3(n=87) | 8.35688328 | 2.0630137  | 0 |
| TCGA-DJ-A3VL-01 | G3(n=87) | 8.88322461 | 1.1260274  | 1 |
| TCGA-DJ-A4UL-01 | G3(n=87) | 9.07755426 | 2.57260274 | 0 |
| TCGA-E8-A432-01 | G3(n=87) | 8.74692746 | 1.97260274 | 1 |
| TCGA-E8-A433-01 | G3(n=87) | 8.62271201 | 2.60547945 | 0 |
| TCGA-EL-A3CX-01 | G3(n=87) | 8.61335921 | 8.88493151 | 0 |
| TCGA-EL-A3D1-01 | G3(n=87) | 9.32321568 | 8.2109589  | 0 |
| TCGA-EL-A3D4-01 | G3(n=87) | 8.81493077 | 5.79726027 | 0 |
| TCGA-EL-A3H1-01 | G3(n=87) | 8.22770747 | 4.10958904 | 0 |
| TCGA-EL-A3H2-01 | G3(n=87) | 7.86979694 | 2.79178082 | 1 |
| TCGA-EL-A3ZM-01 | G3(n=87) | 8.647907   | 3.00273973 | 0 |
| TCGA-EL-A3ZN-01 | G3(n=87) | 8.68957003 | 4.42191781 | 0 |
| TCGA-EL-A3ZQ-01 | G3(n=87) | 10.4160214 | 5.10136986 | 0 |
| TCGA-EL-A3ZR-01 | G3(n=87) | 8.57863821 | 5.01369863 | 0 |
| TCGA-EL-A4K7-01 | G3(n=87) | 9.40351359 | 3.42739726 | 0 |
| TCGA-EL-A4KH-01 | G3(n=87) | 9.41828095 | 2.25479452 | 0 |
| TCGA-EL-A4KI-01 | G3(n=87) | 10.2201545 | 0.7260274  | 1 |
| TCGA-EM-A1YE-01 | G3(n=87) | 8.44180851 | 4.50684932 | 0 |
| TCGA-EM-A22Q-01 | G3(n=87) | 10.3105495 | 1.18630137 | 0 |
| TCGA-EM-A2CR-01 | G3(n=87) | 9.62273432 | 1.1369863  | 0 |
| TCGA-EM-A2CT-01 | G3(n=87) | 7.65564106 | 4.03835616 | 0 |
| TCGA-EM-A3AI-01 | G3(n=87) | 8.49824835 | 1.87671233 | 0 |
| TCGA-EM-A3AJ-01 | G3(n=87) | 7.82927257 | 2.57808219 | 0 |
| TCGA-EM-A3AL-01 | G3(n=87) | 8.50353413 | 1.17808219 | 0 |
| TCGA-EM-A3AQ-01 | G3(n=87) | 8.65690071 | 2.47671233 | 0 |
| TCGA-EM-A3FL-01 | G3(n=87) | 7.63534651 | 3.94794521 | 0 |
| TCGA-EM-A3FN-01 | G3(n=87) | 8.61358021 | 1.00547945 | 0 |
| TCGA-EM-A3FP-01 | G3(n=87) | 8.49363918 | 1.44931507 | 0 |
| TCGA-EM-A3O6-01 | G3(n=87) | 8.19400793 | 1.25479452 | 0 |
| TCGA-EM-A3OA-01 | G3(n=87) | 8.07105277 | 2.25205479 | 0 |

|                 |          |            |            |   |
|-----------------|----------|------------|------------|---|
| TCGA-EM-A3OB-01 | G3(n=87) | 8.59996196 | 3.22191781 | 0 |
| TCGA-EM-A3ST-01 | G3(n=87) | 10.0058674 | 2.64657534 | 1 |
| TCGA-EM-A3SU-01 | G3(n=87) | 8.66223284 | 2.49589041 | 0 |
| TCGA-EM-A4FH-01 | G3(n=87) | 8.1955834  | 2.44383562 | 0 |
| TCGA-EM-A4FK-01 | G3(n=87) | 8.01750761 | 1.77808219 | 0 |
| TCGA-ET-A2N0-01 | G3(n=87) | 9.51483927 | 4.38356164 | 0 |
| TCGA-ET-A2N3-01 | G3(n=87) | 9.16419096 | 6.94520548 | 0 |
| TCGA-ET-A2N5-01 | G3(n=87) | 8.1921452  | 6.73972603 | 0 |
| TCGA-ET-A39K-01 | G3(n=87) | 8.91007845 | 1.94794521 | 1 |
| TCGA-ET-A39N-01 | G3(n=87) | 9.00276857 | 10.2767123 | 0 |
| TCGA-ET-A3DV-01 | G3(n=87) | 8.46025053 | 13.8849315 | 0 |
| TCGA-ET-A40P-01 | G3(n=87) | 9.36505589 | 3.66575342 | 0 |
| TCGA-ET-A40R-01 | G3(n=87) | 9.01577183 | 3.69863014 | 0 |
| TCGA-ET-A4KN-01 | G3(n=87) | 10.1940462 | 2.76438356 | 0 |
| TCGA-FE-A235-01 | G3(n=87) | 8.82571961 | 9.78356164 | 0 |
| TCGA-FE-A239-01 | G3(n=87) | 8.02039306 | 2.55616438 | 1 |
| TCGA-FE-A3PD-01 | G3(n=87) | 8.73178545 | 6.56438356 | 0 |
| TCGA-FK-A3SD-01 | G3(n=87) | 8.48934219 | 0.08767123 | 0 |
| TCGA-FK-A3SH-01 | G3(n=87) | 9.25287702 | 4.00821918 | 0 |
| TCGA-FY-A2QD-01 | G3(n=87) | 7.55885083 | 0.10410959 | 0 |
| TCGA-FY-A3NM-01 | G3(n=87) | 7.44042184 | 2.42465753 | 0 |
| TCGA-FY-A3NP-01 | G3(n=87) | 7.75934889 | 1.34520548 | 0 |
| TCGA-FY-A4B0-01 | G3(n=87) | 7.91490612 | 1.15068493 | 0 |
| TCGA-H2-A3RH-01 | G3(n=87) | 8.61446863 | 1.03835616 | 0 |
| TCGA-IM-A41Z-01 | G3(n=87) | 8.08404843 | 2.59178082 | 0 |
| TCGA-KS-A41F-01 | G3(n=87) | 10.4140994 | 11.9643836 | 0 |
| TCGA-KS-A41J-01 | G3(n=87) | 8.48435776 | 1.30684932 | 0 |
| TCGA-KS-A41L-01 | G3(n=87) | 8.49976965 | 9.48767123 | 0 |
| TCGA-KS-A41I-01 | G3(n=87) | 9.29928324 | 2.22465753 | 0 |
| TCGA-L6-A4EP-01 | G3(n=87) | 9.09375717 | 2.78356164 | 0 |
| TCGA-MK-A84Z-01 | G3(n=87) | 8.53718949 | 1.99452055 | 0 |
