# Supplementary material for: Clinical Relevance and Tumor Growth Suppression of Mitochondrial ROS Regulators along NADH:Ubiquinone Oxidoreductase Subunit B3 in Thyroid Cancer
Source: Hindawi journal article supplement (doi:10.1155/2022/8038857), 2022-01-01
Supplement: f2 [file 8038857.f2.zip]

| rownames<br>(datas.final) | Type     | Values      | Group    |
|---------------------------|----------|-------------|----------|
| 1                         | NDUFA1   | 7.839642267 | Tumor_G1 |
| 2                         | NDUFA2   | 6.901279668 | Tumor_G1 |
| 3                         | NDUFA8   | 6.916634304 | Tumor_G1 |
| 4                         | NDUFB1   | 5.573372018 | Tumor_G1 |
| 5                         | NDUFB10  | 7.880803727 | Tumor_G1 |
| 6                         | NDUFB2   | 6.213885747 | Tumor_G1 |
| 7                         | NDUFB3   | 5.671802455 | Tumor_G1 |
| 8                         | NDUFB7   | 8.533851314 | Tumor_G1 |
| 9                         | CYC1     | 6.865884646 | Tumor_G1 |
| 10                        | ETFB     | 4.855080708 | Tumor_G1 |
| 11                        | UQCR10   | 7.343539248 | Tumor_G1 |
| 12                        | UQCRQ    | 7.494016406 | Tumor_G1 |
| 13                        | UQCC3    | 3.729757746 | Tumor_G1 |
| 14                        | COX15    | 4.123425224 | Tumor_G1 |
| 15                        | COX5A    | 7.196844323 | Tumor_G1 |
| 16                        | COX6B1   | 8.767707718 | Tumor_G1 |
| 17                        | COX6C    | 6.436890183 | Tumor_G1 |
| 18                        | COX7A2   | 6.517135913 | Tumor_G1 |
| 19                        | COX7B    | 5.550401568 | Tumor_G1 |
| 20                        | COX8A    | 8.373855639 | Tumor_G1 |
| 21                        | SCO1     | 2.262540645 | Tumor_G1 |
| 22                        | SURF1    | 5.698555039 | Tumor_G1 |
| 23                        | ATP6V1E1 | 6.623781043 | Tumor_G1 |
| 24                        | DLAT     | 3.550448541 | Tumor_G1 |
| 25                        | PDC      | 0.041433796 | Tumor_G1 |
| 26                        | SUCLG2   | 5.772053758 | Tumor_G1 |
| 27                        | SLC25A5  | 7.273443051 | Tumor_G1 |
| 28                        | UCP2     | 6.53327483  | Tumor_G1 |
| 29                        | SOD2     | 4.153575997 | Tumor_G1 |
| 30                        | NOX4     | 1.749118155 | Tumor_G1 |
| 31                        | DUOX1    | 4.809375138 | Tumor_G1 |
| 32                        | DUOXA1   | 4.428201051 | Tumor_G1 |
| 33                        | DUOX2    | 4.061957503 | Tumor_G1 |
| 34                        | DUOXA2   | 3.090086568 | Tumor_G1 |
| 35                        | NDUFA1   | 7.851994698 | Tumor_G1 |
| 36                        | NDUFA2   | 5.846170977 | Tumor_G1 |
| 37                        | NDUFA8   | 6.46015489  | Tumor_G1 |
| 38                        | NDUFB1   | 5.247018435 | Tumor_G1 |

|    |          |             |          |
|----|----------|-------------|----------|
| 39 | NDUFB10  | 6.74537787  | Tumor_G1 |
| 40 | NDUFB2   | 5.246339475 | Tumor_G1 |
| 41 | NDUFB3   | 6.043989643 | Tumor_G1 |
| 42 | NDUFB7   | 7.636328234 | Tumor_G1 |
| 43 | CYC1     | 5.764751244 | Tumor_G1 |
| 44 | ETFB     | 3.931052804 | Tumor_G1 |
| 45 | UQCR10   | 7.213560224 | Tumor_G1 |
| 46 | UQCRQ    | 6.663102122 | Tumor_G1 |
| 47 | UQCC3    | 2.933540287 | Tumor_G1 |
| 48 | COX15    | 4.401701007 | Tumor_G1 |
| 49 | COX5A    | 6.716531043 | Tumor_G1 |
| 50 | COX6B1   | 8.453808286 | Tumor_G1 |
| 51 | COX6C    | 5.908869744 | Tumor_G1 |
| 52 | COX7A2   | 6.67024768  | Tumor_G1 |
| 53 | COX7B    | 6.173962391 | Tumor_G1 |
| 54 | COX8A    | 7.986817421 | Tumor_G1 |
| 55 | SCO1     | 2.885830032 | Tumor_G1 |
| 56 | SURF1    | 5.530933262 | Tumor_G1 |
| 57 | ATP6V1E1 | 6.874852963 | Tumor_G1 |
| 58 | DLAT     | 4.882187031 | Tumor_G1 |
| 59 | PDC      | 0           | Tumor_G1 |
| 60 | SUCLG2   | 5.882569357 | Tumor_G1 |
| 61 | SLC25A5  | 7.836826072 | Tumor_G1 |
| 62 | UCP2     | 7.56332733  | Tumor_G1 |
| 63 | SOD2     | 5.81752386  | Tumor_G1 |
| 64 | NOX4     | 3.062036088 | Tumor_G1 |
| 65 | DUOX1    | 4.909123357 | Tumor_G1 |
| 66 | DUOXA1   | 5.188041246 | Tumor_G1 |
| 67 | DUOX2    | 3.795347978 | Tumor_G1 |
| 68 | DUOXA2   | 1.735844072 | Tumor_G1 |
| 69 | NDUFA1   | 7.794803336 | Tumor_G1 |
| 70 | NDUFA2   | 6.677111084 | Tumor_G1 |
| 71 | NDUFA8   | 6.674515029 | Tumor_G1 |
| 72 | NDUFB1   | 5.479799873 | Tumor_G1 |
| 73 | NDUFB10  | 7.345611123 | Tumor_G1 |
| 74 | NDUFB2   | 6.138629914 | Tumor_G1 |
| 75 | NDUFB3   | 6.242337072 | Tumor_G1 |
| 76 | NDUFB7   | 8.414870107 | Tumor_G1 |
| 77 | CYC1     | 6.639078562 | Tumor_G1 |
| 78 | ETFB     | 4.865690706 | Tumor_G1 |

|     |          |             |          |
|-----|----------|-------------|----------|
| 79  | UQCR10   | 7.411999669 | Tumor_G1 |
| 80  | UQCRQ    | 7.151716163 | Tumor_G1 |
| 81  | UQCC3    | 4.297420791 | Tumor_G1 |
| 82  | COX15    | 4.495081471 | Tumor_G1 |
| 83  | COX5A    | 6.996684409 | Tumor_G1 |
| 84  | COX6B1   | 8.58877593  | Tumor_G1 |
| 85  | COX6C    | 6.231336336 | Tumor_G1 |
| 86  | COX7A2   | 6.713842924 | Tumor_G1 |
| 87  | COX7B    | 5.953148322 | Tumor_G1 |
| 88  | COX8A    | 9.366409733 | Tumor_G1 |
| 89  | SCO1     | 3.048278404 | Tumor_G1 |
| 90  | SURF1    | 6.291880307 | Tumor_G1 |
| 91  | ATP6V1E1 | 6.91845911  | Tumor_G1 |
| 92  | DLAT     | 4.737358762 | Tumor_G1 |
| 93  | PDC      | 0.041474902 | Tumor_G1 |
| 94  | SUCLG2   | 5.631739699 | Tumor_G1 |
| 95  | SLC25A5  | 8.373267826 | Tumor_G1 |
| 96  | UCP2     | 8.490550393 | Tumor_G1 |
| 97  | SOD2     | 5.130912688 | Tumor_G1 |
| 98  | NOX4     | 2.319356383 | Tumor_G1 |
| 99  | DUOX1    | 5.803336533 | Tumor_G1 |
| 100 | DUOXA1   | 6.150442711 | Tumor_G1 |
| 101 | DUOX2    | 5.322676094 | Tumor_G1 |
| 102 | DUOXA2   | 2.815541904 | Tumor_G1 |
| 103 | NDUFA1   | 7.967265091 | Tumor_G1 |
| 104 | NDUFA2   | 6.67140129  | Tumor_G1 |
| 105 | NDUFA8   | 6.075305251 | Tumor_G1 |
| 106 | NDUFB1   | 5.589816967 | Tumor_G1 |
| 107 | NDUFB10  | 7.44936714  | Tumor_G1 |
| 108 | NDUFB2   | 6.136160482 | Tumor_G1 |
| 109 | NDUFB3   | 6.29178362  | Tumor_G1 |
| 110 | NDUFB7   | 8.424591188 | Tumor_G1 |
| 111 | CYC1     | 6.536539287 | Tumor_G1 |
| 112 | ETFB     | 4.442281594 | Tumor_G1 |
| 113 | UQCR10   | 6.535504168 | Tumor_G1 |
| 114 | UQCRQ    | 7.209786315 | Tumor_G1 |
| 115 | UQCC3    | 3.825644595 | Tumor_G1 |
| 116 | COX15    | 4.790739423 | Tumor_G1 |
| 117 | COX5A    | 6.870525972 | Tumor_G1 |
| 118 | COX6B1   | 8.45013027  | Tumor_G1 |

|     |          |             |          |
|-----|----------|-------------|----------|
| 119 | COX6C    | 6.158072641 | Tumor_G1 |
| 120 | COX7A2   | 6.657533655 | Tumor_G1 |
| 121 | COX7B    | 6.094497828 | Tumor_G1 |
| 122 | COX8A    | 9.18066684  | Tumor_G1 |
| 123 | SCO1     | 2.99965329  | Tumor_G1 |
| 124 | SURF1    | 5.57037345  | Tumor_G1 |
| 125 | ATP6V1E1 | 6.363573116 | Tumor_G1 |
| 126 | DLAT     | 5.099968773 | Tumor_G1 |
| 127 | PDC      | 0.271461649 | Tumor_G1 |
| 128 | SUCLG2   | 6.602474411 | Tumor_G1 |
| 129 | SLC25A5  | 7.768873844 | Tumor_G1 |
| 130 | UCP2     | 8.386691077 | Tumor_G1 |
| 131 | SOD2     | 5.286516401 | Tumor_G1 |
| 132 | NOX4     | 2.685764682 | Tumor_G1 |
| 133 | DUOX1    | 6.382116529 | Tumor_G1 |
| 134 | DUOXA1   | 5.989649472 | Tumor_G1 |
| 135 | DUOX2    | 6.131466015 | Tumor_G1 |
| 136 | DUOXA2   | 4.055705906 | Tumor_G1 |
| 137 | NDUFA1   | 8.004634348 | Tumor_G1 |
| 138 | NDUFA2   | 6.600127366 | Tumor_G1 |
| 139 | NDUFA8   | 6.696704364 | Tumor_G1 |
| 140 | NDUFB1   | 5.328072799 | Tumor_G1 |
| 141 | NDUFB10  | 7.330024797 | Tumor_G1 |
| 142 | NDUFB2   | 6.52426214  | Tumor_G1 |
| 143 | NDUFB3   | 5.686250862 | Tumor_G1 |
| 144 | NDUFB7   | 8.456376429 | Tumor_G1 |
| 145 | CYC1     | 6.795252487 | Tumor_G1 |
| 146 | ETFB     | 5.237591417 | Tumor_G1 |
| 147 | UQCR10   | 7.2593286   | Tumor_G1 |
| 148 | UQCRQ    | 7.191499153 | Tumor_G1 |
| 149 | UQCC3    | 4.108116464 | Tumor_G1 |
| 150 | COX15    | 4.583525754 | Tumor_G1 |
| 151 | COX5A    | 6.913465461 | Tumor_G1 |
| 152 | COX6B1   | 8.517802889 | Tumor_G1 |
| 153 | COX6C    | 6.205166902 | Tumor_G1 |
| 154 | COX7A2   | 6.558785733 | Tumor_G1 |
| 155 | COX7B    | 5.695585267 | Tumor_G1 |
| 156 | COX8A    | 9.217164772 | Tumor_G1 |
| 157 | SCO1     | 2.639550249 | Tumor_G1 |
| 158 | SURF1    | 5.717692126 | Tumor_G1 |

|     |          |             |          |
|-----|----------|-------------|----------|
| 159 | ATP6V1E1 | 6.754756875 | Tumor_G1 |
| 160 | DLAT     | 4.67211474  | Tumor_G1 |
| 161 | PDC      | 0.050059037 | Tumor_G1 |
| 162 | SUCLG2   | 5.676310515 | Tumor_G1 |
| 163 | SLC25A5  | 7.520030665 | Tumor_G1 |
| 164 | UCP2     | 8.590283209 | Tumor_G1 |
| 165 | SOD2     | 4.233612447 | Tumor_G1 |
| 166 | NOX4     | 1.342301188 | Tumor_G1 |
| 167 | DUOX1    | 6.54850748  | Tumor_G1 |
| 168 | DUOXA1   | 6.271124274 | Tumor_G1 |
| 169 | DUOX2    | 6.685013602 | Tumor_G1 |
| 170 | DUOXA2   | 5.291646675 | Tumor_G1 |
| 171 | NDUFA1   | 7.190236517 | Tumor_G1 |
| 172 | NDUFA2   | 6.400169044 | Tumor_G1 |
| 173 | NDUFA8   | 6.99468819  | Tumor_G1 |
| 174 | NDUFB1   | 4.907330584 | Tumor_G1 |
| 175 | NDUFB10  | 7.483086653 | Tumor_G1 |
| 176 | NDUFB2   | 5.694420208 | Tumor_G1 |
| 177 | NDUFB3   | 5.490325476 | Tumor_G1 |
| 178 | NDUFB7   | 8.140366147 | Tumor_G1 |
| 179 | CYC1     | 6.873109736 | Tumor_G1 |
| 180 | ETFB     | 4.502087459 | Tumor_G1 |
| 181 | UQCR10   | 7.1742007   | Tumor_G1 |
| 182 | UQCRQ    | 6.761371029 | Tumor_G1 |
| 183 | UQCC3    | 4.001140981 | Tumor_G1 |
| 184 | COX15    | 4.828494251 | Tumor_G1 |
| 185 | COX5A    | 7.099574207 | Tumor_G1 |
| 186 | COX6B1   | 8.41608775  | Tumor_G1 |
| 187 | COX6C    | 5.572804246 | Tumor_G1 |
| 188 | COX7A2   | 6.545868264 | Tumor_G1 |
| 189 | COX7B    | 5.590791947 | Tumor_G1 |
| 190 | COX8A    | 9.163720518 | Tumor_G1 |
| 191 | SCO1     | 3.420494164 | Tumor_G1 |
| 192 | SURF1    | 5.844895297 | Tumor_G1 |
| 193 | ATP6V1E1 | 7.381482638 | Tumor_G1 |
| 194 | DLAT     | 5.535582149 | Tumor_G1 |
| 195 | PDC      | 0.293879882 | Tumor_G1 |
| 196 | SUCLG2   | 6.140797858 | Tumor_G1 |
| 197 | SLC25A5  | 8.308047264 | Tumor_G1 |
| 198 | UCP2     | 6.767444946 | Tumor_G1 |

|     |          |             |          |
|-----|----------|-------------|----------|
| 199 | SOD2     | 6.045143562 | Tumor_G1 |
| 200 | NOX4     | 0.882567059 | Tumor_G1 |
| 201 | DUOX1    | 4.579629124 | Tumor_G1 |
| 202 | DUOXA1   | 5.341025073 | Tumor_G1 |
| 203 | DUOX2    | 4.053508083 | Tumor_G1 |
| 204 | DUOXA2   | 2.24220868  | Tumor_G1 |
| 205 | NDUFA1   | 7.400122294 | Tumor_G1 |
| 206 | NDUFA2   | 6.419334364 | Tumor_G1 |
| 207 | NDUFA8   | 6.587938727 | Tumor_G1 |
| 208 | NDUFB1   | 5.146268886 | Tumor_G1 |
| 209 | NDUFB10  | 7.14524372  | Tumor_G1 |
| 210 | NDUFB2   | 6.183566963 | Tumor_G1 |
| 211 | NDUFB3   | 5.80270173  | Tumor_G1 |
| 212 | NDUFB7   | 8.257626821 | Tumor_G1 |
| 213 | CYC1     | 6.609475625 | Tumor_G1 |
| 214 | ETFB     | 4.54737233  | Tumor_G1 |
| 215 | UQCR10   | 7.052401301 | Tumor_G1 |
| 216 | UQCRQ    | 6.790220575 | Tumor_G1 |
| 217 | UQCC3    | 4.09754765  | Tumor_G1 |
| 218 | COX15    | 4.742404324 | Tumor_G1 |
| 219 | COX5A    | 6.759539621 | Tumor_G1 |
| 220 | COX6B1   | 8.193539964 | Tumor_G1 |
| 221 | COX6C    | 5.96086095  | Tumor_G1 |
| 222 | COX7A2   | 6.410631878 | Tumor_G1 |
| 223 | COX7B    | 5.60481183  | Tumor_G1 |
| 224 | COX8A    | 9.185419722 | Tumor_G1 |
| 225 | SCO1     | 2.913863108 | Tumor_G1 |
| 226 | SURF1    | 6.131737063 | Tumor_G1 |
| 227 | ATP6V1E1 | 6.838169395 | Tumor_G1 |
| 228 | DLAT     | 4.942393446 | Tumor_G1 |
| 229 | PDC      | 0.146419071 | Tumor_G1 |
| 230 | SUCLG2   | 6.061996054 | Tumor_G1 |
| 231 | SLC25A5  | 7.950108705 | Tumor_G1 |
| 232 | UCP2     | 8.196949622 | Tumor_G1 |
| 233 | SOD2     | 4.446696013 | Tumor_G1 |
| 234 | NOX4     | 1.332982066 | Tumor_G1 |
| 235 | DUOX1    | 6.819125739 | Tumor_G1 |
| 236 | DUOXA1   | 6.330415085 | Tumor_G1 |
| 237 | DUOX2    | 6.939899724 | Tumor_G1 |
| 238 | DUOXA2   | 4.403329139 | Tumor_G1 |

|     |          |             |          |
|-----|----------|-------------|----------|
| 239 | NDUFA1   | 7.886413508 | Tumor_G1 |
| 240 | NDUFA2   | 6.912049618 | Tumor_G1 |
| 241 | NDUFA8   | 7.02543975  | Tumor_G1 |
| 242 | NDUFB1   | 5.632284396 | Tumor_G1 |
| 243 | NDUFB10  | 7.514431202 | Tumor_G1 |
| 244 | NDUFB2   | 6.567939479 | Tumor_G1 |
| 245 | NDUFB3   | 5.856226054 | Tumor_G1 |
| 246 | NDUFB7   | 8.690610622 | Tumor_G1 |
| 247 | CYC1     | 6.762981738 | Tumor_G1 |
| 248 | ETFB     | 4.873200628 | Tumor_G1 |
| 249 | UQCR10   | 7.329832886 | Tumor_G1 |
| 250 | UQCRQ    | 7.32774817  | Tumor_G1 |
| 251 | UQCC3    | 4.333164804 | Tumor_G1 |
| 252 | COX15    | 4.400114698 | Tumor_G1 |
| 253 | COX5A    | 7.134508245 | Tumor_G1 |
| 254 | COX6B1   | 8.868899344 | Tumor_G1 |
| 255 | COX6C    | 6.516528287 | Tumor_G1 |
| 256 | COX7A2   | 6.728253716 | Tumor_G1 |
| 257 | COX7B    | 5.989158251 | Tumor_G1 |
| 258 | COX8A    | 9.26835094  | Tumor_G1 |
| 259 | SCO1     | 2.569430751 | Tumor_G1 |
| 260 | SURF1    | 5.908059915 | Tumor_G1 |
| 261 | ATP6V1E1 | 6.762323674 | Tumor_G1 |
| 262 | DLAT     | 4.688501738 | Tumor_G1 |
| 263 | PDC      | 0.117772893 | Tumor_G1 |
| 264 | SUCLG2   | 5.964194719 | Tumor_G1 |
| 265 | SLC25A5  | 7.685138715 | Tumor_G1 |
| 266 | UCP2     | 8.799554236 | Tumor_G1 |
| 267 | SOD2     | 4.529994453 | Tumor_G1 |
| 268 | NOX4     | 2.17789101  | Tumor_G1 |
| 269 | DUOX1    | 5.81738736  | Tumor_G1 |
| 270 | DUOXA1   | 6.016055663 | Tumor_G1 |
| 271 | DUOX2    | 6.539343505 | Tumor_G1 |
| 272 | DUOXA2   | 4.465518854 | Tumor_G1 |
| 273 | NDUFA1   | 7.670975957 | Tumor_G1 |
| 274 | NDUFA2   | 6.519379832 | Tumor_G1 |
| 275 | NDUFA8   | 6.910868641 | Tumor_G1 |
| 276 | NDUFB1   | 5.412473974 | Tumor_G1 |
| 277 | NDUFB10  | 7.522109094 | Tumor_G1 |
| 278 | NDUFB2   | 6.161458494 | Tumor_G1 |

|     |          |             |          |
|-----|----------|-------------|----------|
| 279 | NDUFB3   | 5.883533649 | Tumor_G1 |
| 280 | NDUFB7   | 8.479040629 | Tumor_G1 |
| 281 | CYC1     | 6.529553765 | Tumor_G1 |
| 282 | ETFB     | 4.955210048 | Tumor_G1 |
| 283 | UQCR10   | 7.478886292 | Tumor_G1 |
| 284 | UQCRQ    | 7.157820881 | Tumor_G1 |
| 285 | UQCC3    | 4.286024338 | Tumor_G1 |
| 286 | COX15    | 4.611362101 | Tumor_G1 |
| 287 | COX5A    | 6.940884144 | Tumor_G1 |
| 288 | COX6B1   | 8.523853408 | Tumor_G1 |
| 289 | COX6C    | 6.307434598 | Tumor_G1 |
| 290 | COX7A2   | 6.645451861 | Tumor_G1 |
| 291 | COX7B    | 5.878614695 | Tumor_G1 |
| 292 | COX8A    | 9.143188503 | Tumor_G1 |
| 293 | SCO1     | 3.074772935 | Tumor_G1 |
| 294 | SURF1    | 6.254476827 | Tumor_G1 |
| 295 | ATP6V1E1 | 6.807385461 | Tumor_G1 |
| 296 | DLAT     | 4.676608525 | Tumor_G1 |
| 297 | PDC      | 0.081269309 | Tumor_G1 |
| 298 | SUCLG2   | 5.88953688  | Tumor_G1 |
| 299 | SLC25A5  | 7.891489604 | Tumor_G1 |
| 300 | UCP2     | 8.262363124 | Tumor_G1 |
| 301 | SOD2     | 4.996697414 | Tumor_G1 |
| 302 | NOX4     | 2.892953196 | Tumor_G1 |
| 303 | DUOX1    | 5.960436456 | Tumor_G1 |
| 304 | DUOXA1   | 6.377450783 | Tumor_G1 |
| 305 | DUOX2    | 6.378663554 | Tumor_G1 |
| 306 | DUOXA2   | 4.515654785 | Tumor_G1 |
| 307 | NDUFA1   | 7.691975432 | Tumor_G1 |
| 308 | NDUFA2   | 6.639135107 | Tumor_G1 |
| 309 | NDUFA8   | 6.945826638 | Tumor_G1 |
| 310 | NDUFB1   | 5.493533668 | Tumor_G1 |
| 311 | NDUFB10  | 7.557383977 | Tumor_G1 |
| 312 | NDUFB2   | 6.187796869 | Tumor_G1 |
| 313 | NDUFB3   | 6.071292217 | Tumor_G1 |
| 314 | NDUFB7   | 8.283140896 | Tumor_G1 |
| 315 | CYC1     | 6.670704783 | Tumor_G1 |
| 316 | ETFB     | 4.546556396 | Tumor_G1 |
| 317 | UQCR10   | 7.430563753 | Tumor_G1 |
| 318 | UQCRQ    | 6.882192074 | Tumor_G1 |



|     |          |             |          |
|-----|----------|-------------|----------|
| 319 | UQCC3    | 3.964955315 | Tumor_G1 |
| 320 | COX15    | 4.731118465 | Tumor_G1 |
| 321 | COX5A    | 7.062441698 | Tumor_G1 |
| 322 | COX6B1   | 8.453083691 | Tumor_G1 |
| 323 | COX6C    | 6.18852254  | Tumor_G1 |
| 324 | COX7A2   | 6.58881744  | Tumor_G1 |
| 325 | COX7B    | 5.868960707 | Tumor_G1 |
| 326 | COX8A    | 9.331680603 | Tumor_G1 |
| 327 | SCO1     | 3.195184945 | Tumor_G1 |
| 328 | SURF1    | 5.931726343 | Tumor_G1 |
| 329 | ATP6V1E1 | 7.073270788 | Tumor_G1 |
| 330 | DLAT     | 5.181793403 | Tumor_G1 |
| 331 | PDC      | 0           | Tumor_G1 |
| 332 | SUCLG2   | 5.86000395  | Tumor_G1 |
| 333 | SLC25A5  | 8.084317592 | Tumor_G1 |
| 334 | UCP2     | 8.123542233 | Tumor_G1 |
| 335 | SOD2     | 5.619869079 | Tumor_G1 |
| 336 | NOX4     | 1.925875638 | Tumor_G1 |
| 337 | DUOX1    | 6.029668512 | Tumor_G1 |
| 338 | DUOXA1   | 6.254825815 | Tumor_G1 |
| 339 | DUOX2    | 5.942691315 | Tumor_G1 |
| 340 | DUOXA2   | 3.891223492 | Tumor_G1 |
| 341 | NDUFA1   | 8.060904678 | Tumor_G1 |
| 342 | NDUFA2   | 6.135548931 | Tumor_G1 |
| 343 | NDUFA8   | 7.012900958 | Tumor_G1 |
| 344 | NDUFB1   | 5.505747661 | Tumor_G1 |
| 345 | NDUFB10  | 7.14893891  | Tumor_G1 |
| 346 | NDUFB2   | 5.822030238 | Tumor_G1 |
| 347 | NDUFB3   | 6.418789642 | Tumor_G1 |
| 348 | NDUFB7   | 8.22999874  | Tumor_G1 |
| 349 | CYC1     | 6.548021645 | Tumor_G1 |
| 350 | ETFB     | 4.385047502 | Tumor_G1 |
| 351 | UQCR10   | 7.519346233 | Tumor_G1 |
| 352 | UQCRQ    | 6.655119956 | Tumor_G1 |
| 353 | UQCC3    | 3.570424769 | Tumor_G1 |
| 354 | COX15    | 5.091649546 | Tumor_G1 |
| 355 | COX5A    | 6.595833941 | Tumor_G1 |
| 356 | COX6B1   | 8.580362431 | Tumor_G1 |
| 357 | COX6C    | 5.897893979 | Tumor_G1 |
| 358 | COX7A2   | 6.541222121 | Tumor_G1 |

|     |          |             |          |
|-----|----------|-------------|----------|
| 359 | COX7B    | 6.328756945 | Tumor_G1 |
| 360 | COX8A    | 9.173874245 | Tumor_G1 |
| 361 | SCO1     | 3.712471028 | Tumor_G1 |
| 362 | SURF1    | 6.150786736 | Tumor_G1 |
| 363 | ATP6V1E1 | 6.462788627 | Tumor_G1 |
| 364 | DLAT     | 4.841030494 | Tumor_G1 |
| 365 | PDC      | 0.106629552 | Tumor_G1 |
| 366 | SUCLG2   | 5.868892896 | Tumor_G1 |
| 367 | SLC25A5  | 8.225366268 | Tumor_G1 |
| 368 | UCP2     | 8.067048772 | Tumor_G1 |
| 369 | SOD2     | 5.833351318 | Tumor_G1 |
| 370 | NOX4     | 1.627297357 | Tumor_G1 |
| 371 | DUOX1    | 5.600909789 | Tumor_G1 |
| 372 | DUOXA1   | 5.690790141 | Tumor_G1 |
| 373 | DUOX2    | 5.657858085 | Tumor_G1 |
| 374 | DUOXA2   | 4.84346096  | Tumor_G1 |
| 375 | NDUFA1   | 7.56131842  | Tumor_G1 |
| 376 | NDUFA2   | 6.340863896 | Tumor_G1 |
| 377 | NDUFA8   | 6.787381796 | Tumor_G1 |
| 378 | NDUFB1   | 5.243556905 | Tumor_G1 |
| 379 | NDUFB10  | 6.98123149  | Tumor_G1 |
| 380 | NDUFB2   | 6.115547796 | Tumor_G1 |
| 381 | NDUFB3   | 5.994463607 | Tumor_G1 |
| 382 | NDUFB7   | 7.818199182 | Tumor_G1 |
| 383 | CYC1     | 6.43526567  | Tumor_G1 |
| 384 | ETFB     | 4.393070274 | Tumor_G1 |
| 385 | UQCR10   | 7.144283434 | Tumor_G1 |
| 386 | UQCRQ    | 6.715292106 | Tumor_G1 |
| 387 | UQCC3    | 3.702912842 | Tumor_G1 |
| 388 | COX15    | 4.73193958  | Tumor_G1 |
| 389 | COX5A    | 6.659922551 | Tumor_G1 |
| 390 | COX6B1   | 8.244618263 | Tumor_G1 |
| 391 | COX6C    | 5.943720932 | Tumor_G1 |
| 392 | COX7A2   | 6.551891722 | Tumor_G1 |
| 393 | COX7B    | 5.722816443 | Tumor_G1 |
| 394 | COX8A    | 8.298706337 | Tumor_G1 |
| 395 | SCO1     | 3.063627804 | Tumor_G1 |
| 396 | SURF1    | 5.949344267 | Tumor_G1 |
| 397 | ATP6V1E1 | 6.858590198 | Tumor_G1 |
| 398 | DLAT     | 4.86001937  | Tumor_G1 |

|     |          |             |          |
|-----|----------|-------------|----------|
| 399 | PDC      | 0.049171915 | Tumor_G1 |
| 400 | SUCLG2   | 5.538469181 | Tumor_G1 |
| 401 | SLC25A5  | 8.119895502 | Tumor_G1 |
| 402 | UCP2     | 8.041958534 | Tumor_G1 |
| 403 | SOD2     | 5.72790981  | Tumor_G1 |
| 404 | NOX4     | 2.925059847 | Tumor_G1 |
| 405 | DUOX1    | 5.517164886 | Tumor_G1 |
| 406 | DUOXA1   | 5.81012927  | Tumor_G1 |
| 407 | DUOX2    | 5.20929963  | Tumor_G1 |
| 408 | DUOXA2   | 2.836703204 | Tumor_G1 |
| 409 | NDUFA1   | 7.553500728 | Tumor_G1 |
| 410 | NDUFA2   | 6.123070202 | Tumor_G1 |
| 411 | NDUFA8   | 6.669046652 | Tumor_G1 |
| 412 | NDUFB1   | 5.159912639 | Tumor_G1 |
| 413 | NDUFB10  | 7.031839849 | Tumor_G1 |
| 414 | NDUFB2   | 5.719130787 | Tumor_G1 |
| 415 | NDUFB3   | 5.851102939 | Tumor_G1 |
| 416 | NDUFB7   | 8.233225989 | Tumor_G1 |
| 417 | CYC1     | 6.436823756 | Tumor_G1 |
| 418 | ETFB     | 4.760591391 | Tumor_G1 |
| 419 | UQCR10   | 7.208500075 | Tumor_G1 |
| 420 | UQCRQ    | 6.919567328 | Tumor_G1 |
| 421 | UQCC3    | 3.834547245 | Tumor_G1 |
| 422 | COX15    | 4.351551776 | Tumor_G1 |
| 423 | COX5A    | 6.530556042 | Tumor_G1 |
| 424 | COX6B1   | 8.371168761 | Tumor_G1 |
| 425 | COX6C    | 5.815917716 | Tumor_G1 |
| 426 | COX7A2   | 6.313385197 | Tumor_G1 |
| 427 | COX7B    | 5.736873431 | Tumor_G1 |
| 428 | COX8A    | 8.593618239 | Tumor_G1 |
| 429 | SCO1     | 2.89542353  | Tumor_G1 |
| 430 | SURF1    | 5.952940534 | Tumor_G1 |
| 431 | ATP6V1E1 | 6.297310951 | Tumor_G1 |
| 432 | DLAT     | 4.333968749 | Tumor_G1 |
| 433 | PDC      | 0           | Tumor_G1 |
| 434 | SUCLG2   | 5.628962802 | Tumor_G1 |
| 435 | SLC25A5  | 7.770692156 | Tumor_G1 |
| 436 | UCP2     | 7.570451299 | Tumor_G1 |
| 437 | SOD2     | 5.26417118  | Tumor_G1 |
| 438 | NOX4     | 2.153850368 | Tumor_G1 |

|     |          |             |          |
|-----|----------|-------------|----------|
| 439 | DUOX1    | 6.045315807 | Tumor_G1 |
| 440 | DUOXA1   | 6.049354131 | Tumor_G1 |
| 441 | DUOX2    | 5.957600571 | Tumor_G1 |
| 442 | DUOXA2   | 3.731884966 | Tumor_G1 |
| 443 | NDUFA1   | 7.694114085 | Tumor_G1 |
| 444 | NDUFA2   | 6.633895387 | Tumor_G1 |
| 445 | NDUFA8   | 7.049552291 | Tumor_G1 |
| 446 | NDUFB1   | 5.302264897 | Tumor_G1 |
| 447 | NDUFB10  | 7.475403229 | Tumor_G1 |
| 448 | NDUFB2   | 6.681317233 | Tumor_G1 |
| 449 | NDUFB3   | 6.083018618 | Tumor_G1 |
| 450 | NDUFB7   | 8.156261555 | Tumor_G1 |
| 451 | CYC1     | 6.762504777 | Tumor_G1 |
| 452 | ETFB     | 4.970871841 | Tumor_G1 |
| 453 | UQCR10   | 7.503059802 | Tumor_G1 |
| 454 | UQCRQ    | 7.131994153 | Tumor_G1 |
| 455 | UQCC3    | 4.188305104 | Tumor_G1 |
| 456 | COX15    | 4.719691144 | Tumor_G1 |
| 457 | COX5A    | 7.022056182 | Tumor_G1 |
| 458 | COX6B1   | 8.574928563 | Tumor_G1 |
| 459 | COX6C    | 6.357976187 | Tumor_G1 |
| 460 | COX7A2   | 6.621230893 | Tumor_G1 |
| 461 | COX7B    | 6.008341989 | Tumor_G1 |
| 462 | COX8A    | 9.423804609 | Tumor_G1 |
| 463 | SCO1     | 3.09143725  | Tumor_G1 |
| 464 | SURF1    | 6.354671717 | Tumor_G1 |
| 465 | ATP6V1E1 | 7.034613608 | Tumor_G1 |
| 466 | DLAT     | 5.012375155 | Tumor_G1 |
| 467 | PDC      | 0.140804418 | Tumor_G1 |
| 468 | SUCLG2   | 6.137949704 | Tumor_G1 |
| 469 | SLC25A5  | 8.005627349 | Tumor_G1 |
| 470 | UCP2     | 8.521496687 | Tumor_G1 |
| 471 | SOD2     | 5.111427443 | Tumor_G1 |
| 472 | NOX4     | 2.406282913 | Tumor_G1 |
| 473 | DUOX1    | 5.984190487 | Tumor_G1 |
| 474 | DUOXA1   | 6.416093506 | Tumor_G1 |
| 475 | DUOX2    | 6.638716221 | Tumor_G1 |
| 476 | DUOXA2   | 4.690077648 | Tumor_G1 |
| 477 | NDUFA1   | 7.895763147 | Tumor_G1 |
| 478 | NDUFA2   | 6.633712628 | Tumor_G1 |

|     |          |             |          |
|-----|----------|-------------|----------|
| 479 | NDUFA8   | 6.859613696 | Tumor_G1 |
| 480 | NDUFB1   | 5.592163034 | Tumor_G1 |
| 481 | NDUFB10  | 7.298669621 | Tumor_G1 |
| 482 | NDUFB2   | 6.408526225 | Tumor_G1 |
| 483 | NDUFB3   | 6.232650902 | Tumor_G1 |
| 484 | NDUFB7   | 8.289143614 | Tumor_G1 |
| 485 | CYC1     | 6.514990824 | Tumor_G1 |
| 486 | ETFB     | 4.350487861 | Tumor_G1 |
| 487 | UQCR10   | 7.527485598 | Tumor_G1 |
| 488 | UQCRQ    | 7.188745246 | Tumor_G1 |
| 489 | UQCC3    | 3.986923182 | Tumor_G1 |
| 490 | COX15    | 4.463350284 | Tumor_G1 |
| 491 | COX5A    | 7.198217612 | Tumor_G1 |
| 492 | COX6B1   | 8.487673014 | Tumor_G1 |
| 493 | COX6C    | 6.442010415 | Tumor_G1 |
| 494 | COX7A2   | 6.744800887 | Tumor_G1 |
| 495 | COX7B    | 5.923648541 | Tumor_G1 |
| 496 | COX8A    | 8.808779556 | Tumor_G1 |
| 497 | SCO1     | 3.016280766 | Tumor_G1 |
| 498 | SURF1    | 5.746283274 | Tumor_G1 |
| 499 | ATP6V1E1 | 6.893942831 | Tumor_G1 |
| 500 | DLAT     | 5.04428074  | Tumor_G1 |
| 501 | PDC      | 0           | Tumor_G1 |
| 502 | SUCLG2   | 6.327284392 | Tumor_G1 |
| 503 | SLC25A5  | 8.085923652 | Tumor_G1 |
| 504 | UCP2     | 7.640337134 | Tumor_G1 |
| 505 | SOD2     | 5.669875215 | Tumor_G1 |
| 506 | NOX4     | 1.772651172 | Tumor_G1 |
| 507 | DUOX1    | 5.222270716 | Tumor_G1 |
| 508 | DUOXA1   | 5.491223644 | Tumor_G1 |
| 509 | DUOX2    | 4.472254923 | Tumor_G1 |
| 510 | DUOXA2   | 2.690962833 | Tumor_G1 |
| 511 | NDUFA1   | 8.097363822 | Tumor_G1 |
| 512 | NDUFA2   | 7.046133122 | Tumor_G1 |
| 513 | NDUFA8   | 6.967672096 | Tumor_G1 |
| 514 | NDUFB1   | 5.784584434 | Tumor_G1 |
| 515 | NDUFB10  | 7.419902792 | Tumor_G1 |
| 516 | NDUFB2   | 6.702822213 | Tumor_G1 |
| 517 | NDUFB3   | 6.343706889 | Tumor_G1 |
| 518 | NDUFB7   | 8.686509163 | Tumor_G1 |

|     |          |             |          |
|-----|----------|-------------|----------|
| 519 | CYC1     | 7.152009264 | Tumor_G1 |
| 520 | ETFB     | 4.657587942 | Tumor_G1 |
| 521 | UQCR10   | 7.790160133 | Tumor_G1 |
| 522 | UQCRQ    | 7.304081059 | Tumor_G1 |
| 523 | UQCC3    | 4.289612925 | Tumor_G1 |
| 524 | COX15    | 4.424197558 | Tumor_G1 |
| 525 | COX5A    | 7.3030281   | Tumor_G1 |
| 526 | COX6B1   | 8.801745603 | Tumor_G1 |
| 527 | COX6C    | 6.312744819 | Tumor_G1 |
| 528 | COX7A2   | 7.008387866 | Tumor_G1 |
| 529 | COX7B    | 6.018699605 | Tumor_G1 |
| 530 | COX8A    | 9.295873531 | Tumor_G1 |
| 531 | SCO1     | 3.131928995 | Tumor_G1 |
| 532 | SURF1    | 6.182817238 | Tumor_G1 |
| 533 | ATP6V1E1 | 6.877985248 | Tumor_G1 |
| 534 | DLAT     | 4.760581561 | Tumor_G1 |
| 535 | PDC      | 0.050072893 | Tumor_G1 |
| 536 | SUCLG2   | 6.039629737 | Tumor_G1 |
| 537 | SLC25A5  | 8.664402544 | Tumor_G1 |
| 538 | UCP2     | 8.642819063 | Tumor_G1 |
| 539 | SOD2     | 5.604026857 | Tumor_G1 |
| 540 | NOX4     | 1.461107855 | Tumor_G1 |
| 541 | DUOX1    | 4.694239749 | Tumor_G1 |
| 542 | DUOXA1   | 4.953277731 | Tumor_G1 |
| 543 | DUOX2    | 3.748501476 | Tumor_G1 |
| 544 | DUOXA2   | 2.938426458 | Tumor_G1 |
| 545 | NDUFA1   | 7.706640214 | Tumor_G1 |
| 546 | NDUFA2   | 6.0211191   | Tumor_G1 |
| 547 | NDUFA8   | 6.252770286 | Tumor_G1 |
| 548 | NDUFB1   | 4.879502021 | Tumor_G1 |
| 549 | NDUFB10  | 6.880793445 | Tumor_G1 |
| 550 | NDUFB2   | 6.176888894 | Tumor_G1 |
| 551 | NDUFB3   | 5.660024744 | Tumor_G1 |
| 552 | NDUFB7   | 7.708107641 | Tumor_G1 |
| 553 | CYC1     | 6.526648119 | Tumor_G1 |
| 554 | ETFB     | 3.705003994 | Tumor_G1 |
| 555 | UQCR10   | 7.353308268 | Tumor_G1 |
| 556 | UQCRQ    | 6.559201348 | Tumor_G1 |
| 557 | UQCC3    | 3.548766073 | Tumor_G1 |
| 558 | COX15    | 3.961311137 | Tumor_G1 |

|     |          |             |          |
|-----|----------|-------------|----------|
| 559 | COX5A    | 6.859345278 | Tumor_G1 |
| 560 | COX6B1   | 8.009169346 | Tumor_G1 |
| 561 | COX6C    | 5.907319801 | Tumor_G1 |
| 562 | COX7A2   | 6.106337159 | Tumor_G1 |
| 563 | COX7B    | 5.666893479 | Tumor_G1 |
| 564 | COX8A    | 8.775836719 | Tumor_G1 |
| 565 | SCO1     | 2.335343821 | Tumor_G1 |
| 566 | SURF1    | 5.551593593 | Tumor_G1 |
| 567 | ATP6V1E1 | 5.950855457 | Tumor_G1 |
| 568 | DLAT     | 3.851257942 | Tumor_G1 |
| 569 | PDC      | 0.087235612 | Tumor_G1 |
| 570 | SUCLG2   | 4.942628051 | Tumor_G1 |
| 571 | SLC25A5  | 7.725237263 | Tumor_G1 |
| 572 | UCP2     | 6.476174958 | Tumor_G1 |
| 573 | SOD2     | 6.015300469 | Tumor_G1 |
| 574 | NOX4     | 0.446600309 | Tumor_G1 |
| 575 | DUOX1    | 3.418431884 | Tumor_G1 |
| 576 | DUOXA1   | 3.183669369 | Tumor_G1 |
| 577 | DUOX2    | 3.411629015 | Tumor_G1 |
| 578 | DUOXA2   | 2.153055298 | Tumor_G1 |
| 579 | NDUFA1   | 7.727797501 | Tumor_G1 |
| 580 | NDUFA2   | 6.867667601 | Tumor_G1 |
| 581 | NDUFA8   | 6.805497587 | Tumor_G1 |
| 582 | NDUFB1   | 5.471855461 | Tumor_G1 |
| 583 | NDUFB10  | 7.243562203 | Tumor_G1 |
| 584 | NDUFB2   | 6.250953027 | Tumor_G1 |
| 585 | NDUFB3   | 6.008230899 | Tumor_G1 |
| 586 | NDUFB7   | 8.352352108 | Tumor_G1 |
| 587 | CYC1     | 6.665242199 | Tumor_G1 |
| 588 | ETFB     | 4.663385159 | Tumor_G1 |
| 589 | UQCR10   | 7.48776948  | Tumor_G1 |
| 590 | UQCRQ    | 7.16931387  | Tumor_G1 |
| 591 | UQCC3    | 4.038505405 | Tumor_G1 |
| 592 | COX15    | 4.450660038 | Tumor_G1 |
| 593 | COX5A    | 7.011364815 | Tumor_G1 |
| 594 | COX6B1   | 8.660061606 | Tumor_G1 |
| 595 | COX6C    | 6.364711148 | Tumor_G1 |
| 596 | COX7A2   | 6.814964917 | Tumor_G1 |
| 597 | COX7B    | 5.822128751 | Tumor_G1 |
| 598 | COX8A    | 9.062136675 | Tumor_G1 |

|     |          |             |          |
|-----|----------|-------------|----------|
| 599 | SCO1     | 2.952718627 | Tumor_G1 |
| 600 | SURF1    | 6.243201304 | Tumor_G1 |
| 601 | ATP6V1E1 | 7.113331084 | Tumor_G1 |
| 602 | DLAT     | 4.777428983 | Tumor_G1 |
| 603 | PDC      | 0.148830023 | Tumor_G1 |
| 604 | SUCLG2   | 5.992705936 | Tumor_G1 |
| 605 | SLC25A5  | 7.852767545 | Tumor_G1 |
| 606 | UCP2     | 8.129906536 | Tumor_G1 |
| 607 | SOD2     | 4.965971178 | Tumor_G1 |
| 608 | NOX4     | 2.719290562 | Tumor_G1 |
| 609 | DUOX1    | 5.283178839 | Tumor_G1 |
| 610 | DUOXA1   | 5.517721617 | Tumor_G1 |
| 611 | DUOX2    | 4.591690866 | Tumor_G1 |
| 612 | DUOXA2   | 2.952670888 | Tumor_G1 |
| 613 | NDUFA1   | 7.548856419 | Tumor_G1 |
| 614 | NDUFA2   | 6.420657818 | Tumor_G1 |
| 615 | NDUFA8   | 6.916579044 | Tumor_G1 |
| 616 | NDUFB1   | 5.424540471 | Tumor_G1 |
| 617 | NDUFB10  | 7.341839127 | Tumor_G1 |
| 618 | NDUFB2   | 5.794364499 | Tumor_G1 |
| 619 | NDUFB3   | 5.933461604 | Tumor_G1 |
| 620 | NDUFB7   | 8.388608729 | Tumor_G1 |
| 621 | CYC1     | 6.477835723 | Tumor_G1 |
| 622 | ETFB     | 4.618462069 | Tumor_G1 |
| 623 | UQCR10   | 7.250927155 | Tumor_G1 |
| 624 | UQCRQ    | 7.102770757 | Tumor_G1 |
| 625 | UQCC3    | 3.997982572 | Tumor_G1 |
| 626 | COX15    | 4.542472624 | Tumor_G1 |
| 627 | COX5A    | 6.92292721  | Tumor_G1 |
| 628 | COX6B1   | 8.522927846 | Tumor_G1 |
| 629 | COX6C    | 6.119362284 | Tumor_G1 |
| 630 | COX7A2   | 6.522522569 | Tumor_G1 |
| 631 | COX7B    | 5.718534193 | Tumor_G1 |
| 632 | COX8A    | 8.998257924 | Tumor_G1 |
| 633 | SCO1     | 3.049812254 | Tumor_G1 |
| 634 | SURF1    | 6.039212833 | Tumor_G1 |
| 635 | ATP6V1E1 | 6.824017585 | Tumor_G1 |
| 636 | DLAT     | 4.651553607 | Tumor_G1 |
| 637 | PDC      | 0.366102496 | Tumor_G1 |
| 638 | SUCLG2   | 5.685980247 | Tumor_G1 |



|     |          |             |          |
|-----|----------|-------------|----------|
| 639 | SLC25A5  | 7.947934547 | Tumor_G1 |
| 640 | UCP2     | 8.569366906 | Tumor_G1 |
| 641 | SOD2     | 4.630019792 | Tumor_G1 |
| 642 | NOX4     | 3.495556625 | Tumor_G1 |
| 643 | DUOX1    | 5.867145103 | Tumor_G1 |
| 644 | DUOXA1   | 6.391727142 | Tumor_G1 |
| 645 | DUOX2    | 5.8797055   | Tumor_G1 |
| 646 | DUOXA2   | 4.03789235  | Tumor_G1 |
| 647 | NDUFA1   | 7.391070428 | Tumor_G1 |
| 648 | NDUFA2   | 6.181976648 | Tumor_G1 |
| 649 | NDUFA8   | 6.587202708 | Tumor_G1 |
| 650 | NDUFB1   | 5.015161372 | Tumor_G1 |
| 651 | NDUFB10  | 6.986317694 | Tumor_G1 |
| 652 | NDUFB2   | 5.923798773 | Tumor_G1 |
| 653 | NDUFB3   | 5.865981761 | Tumor_G1 |
| 654 | NDUFB7   | 8.08094457  | Tumor_G1 |
| 655 | CYC1     | 6.495465065 | Tumor_G1 |
| 656 | ETFB     | 4.471710897 | Tumor_G1 |
| 657 | UQCR10   | 6.89737633  | Tumor_G1 |
| 658 | UQCRQ    | 6.619361879 | Tumor_G1 |
| 659 | UQCC3    | 3.465531937 | Tumor_G1 |
| 660 | COX15    | 5.03935514  | Tumor_G1 |
| 661 | COX5A    | 6.71821402  | Tumor_G1 |
| 662 | COX6B1   | 8.189747789 | Tumor_G1 |
| 663 | COX6C    | 5.800791566 | Tumor_G1 |
| 664 | COX7A2   | 6.364869553 | Tumor_G1 |
| 665 | COX7B    | 5.710754975 | Tumor_G1 |
| 666 | COX8A    | 8.964328942 | Tumor_G1 |
| 667 | SCO1     | 3.26911881  | Tumor_G1 |
| 668 | SURF1    | 5.911376154 | Tumor_G1 |
| 669 | ATP6V1E1 | 7.179804338 | Tumor_G1 |
| 670 | DLAT     | 5.572982008 | Tumor_G1 |
| 671 | PDC      | 0.225203806 | Tumor_G1 |
| 672 | SUCLG2   | 6.318806739 | Tumor_G1 |
| 673 | SLC25A5  | 8.556996726 | Tumor_G1 |
| 674 | UCP2     | 8.239689346 | Tumor_G1 |
| 675 | SOD2     | 5.819467302 | Tumor_G1 |
| 676 | NOX4     | 2.624654976 | Tumor_G1 |
| 677 | DUOX1    | 6.031965443 | Tumor_G1 |
| 678 | DUOXA1   | 5.946904846 | Tumor_G1 |

|     |          |             |          |
|-----|----------|-------------|----------|
| 679 | DUOX2    | 5.896283744 | Tumor_G1 |
| 680 | DUOXA2   | 3.023268809 | Tumor_G1 |
| 681 | NDUFA1   | 7.369229069 | Tumor_G1 |
| 682 | NDUFA2   | 6.275948755 | Tumor_G1 |
| 683 | NDUFA8   | 6.480718976 | Tumor_G1 |
| 684 | NDUFB1   | 4.779630323 | Tumor_G1 |
| 685 | NDUFB10  | 7.140351836 | Tumor_G1 |
| 686 | NDUFB2   | 6.121706319 | Tumor_G1 |
| 687 | NDUFB3   | 5.6390733   | Tumor_G1 |
| 688 | NDUFB7   | 8.088739843 | Tumor_G1 |
| 689 | CYC1     | 6.728345901 | Tumor_G1 |
| 690 | ETFB     | 4.395230243 | Tumor_G1 |
| 691 | UQCR10   | 6.943461701 | Tumor_G1 |
| 692 | UQCRQ    | 6.371846732 | Tumor_G1 |
| 693 | UQCC3    | 3.93616436  | Tumor_G1 |
| 694 | COX15    | 4.96246818  | Tumor_G1 |
| 695 | COX5A    | 6.734415466 | Tumor_G1 |
| 696 | COX6B1   | 7.979897221 | Tumor_G1 |
| 697 | COX6C    | 5.839856562 | Tumor_G1 |
| 698 | COX7A2   | 6.267986928 | Tumor_G1 |
| 699 | COX7B    | 5.380541238 | Tumor_G1 |
| 700 | COX8A    | 9.05365279  | Tumor_G1 |
| 701 | SCO1     | 3.297323092 | Tumor_G1 |
| 702 | SURF1    | 6.035609075 | Tumor_G1 |
| 703 | ATP6V1E1 | 7.12125291  | Tumor_G1 |
| 704 | DLAT     | 5.522388485 | Tumor_G1 |
| 705 | PDC      | 0.061742218 | Tumor_G1 |
| 706 | SUCLG2   | 6.447393898 | Tumor_G1 |
| 707 | SLC25A5  | 8.475092722 | Tumor_G1 |
| 708 | UCP2     | 7.467218199 | Tumor_G1 |
| 709 | SOD2     | 5.804777648 | Tumor_G1 |
| 710 | NOX4     | 2.753480987 | Tumor_G1 |
| 711 | DUOX1    | 6.271117051 | Tumor_G1 |
| 712 | DUOXA1   | 6.022550452 | Tumor_G1 |
| 713 | DUOX2    | 5.846243603 | Tumor_G1 |
| 714 | DUOXA2   | 3.303291873 | Tumor_G1 |
| 715 | NDUFA1   | 7.471605335 | Tumor_G1 |
| 716 | NDUFA2   | 6.244583405 | Tumor_G1 |
| 717 | NDUFA8   | 6.475544696 | Tumor_G1 |
| 718 | NDUFB1   | 5.11552649  | Tumor_G1 |

|     |          |             |          |
|-----|----------|-------------|----------|
| 719 | NDUFB10  | 7.134191436 | Tumor_G1 |
| 720 | NDUFB2   | 5.936792016 | Tumor_G1 |
| 721 | NDUFB3   | 5.850222128 | Tumor_G1 |
| 722 | NDUFB7   | 7.972339119 | Tumor_G1 |
| 723 | CYC1     | 6.457623574 | Tumor_G1 |
| 724 | ETFB     | 4.459627513 | Tumor_G1 |
| 725 | UQCR10   | 6.668817352 | Tumor_G1 |
| 726 | UQCRQ    | 6.772281338 | Tumor_G1 |
| 727 | UQCC3    | 3.858822711 | Tumor_G1 |
| 728 | COX15    | 4.418882167 | Tumor_G1 |
| 729 | COX5A    | 6.718165295 | Tumor_G1 |
| 730 | COX6B1   | 7.96015005  | Tumor_G1 |
| 731 | COX6C    | 5.90577943  | Tumor_G1 |
| 732 | COX7A2   | 6.355066194 | Tumor_G1 |
| 733 | COX7B    | 5.500459787 | Tumor_G1 |
| 734 | COX8A    | 9.058284427 | Tumor_G1 |
| 735 | SCO1     | 2.791548221 | Tumor_G1 |
| 736 | SURF1    | 6.04045129  | Tumor_G1 |
| 737 | ATP6V1E1 | 5.90815555  | Tumor_G1 |
| 738 | DLAT     | 4.519105297 | Tumor_G1 |
| 739 | PDC      | 0           | Tumor_G1 |
| 740 | SUCLG2   | 5.765925525 | Tumor_G1 |
| 741 | SLC25A5  | 7.662193137 | Tumor_G1 |
| 742 | UCP2     | 7.748632227 | Tumor_G1 |
| 743 | SOD2     | 6.068117252 | Tumor_G1 |
| 744 | NOX4     | 1.579266586 | Tumor_G1 |
| 745 | DUOX1    | 6.695823589 | Tumor_G1 |
| 746 | DUOXA1   | 6.654543079 | Tumor_G1 |
| 747 | DUOX2    | 7.807722785 | Tumor_G1 |
| 748 | DUOXA2   | 5.113873449 | Tumor_G1 |
| 749 | NDUFA1   | 7.198784251 | Tumor_G1 |
| 750 | NDUFA2   | 6.471471065 | Tumor_G1 |
| 751 | NDUFA8   | 5.972160281 | Tumor_G1 |
| 752 | NDUFB1   | 5.469654754 | Tumor_G1 |
| 753 | NDUFB10  | 7.485809861 | Tumor_G1 |
| 754 | NDUFB2   | 6.345405535 | Tumor_G1 |
| 755 | NDUFB3   | 5.969230159 | Tumor_G1 |
| 756 | NDUFB7   | 8.269225699 | Tumor_G1 |
| 757 | CYC1     | 6.667273228 | Tumor_G1 |
| 758 | ETFB     | 4.380437971 | Tumor_G1 |

|     |          |             |          |
|-----|----------|-------------|----------|
| 759 | UQCR10   | 7.027163117 | Tumor_G1 |
| 760 | UQCRQ    | 7.025082694 | Tumor_G1 |
| 761 | UQCC3    | 3.892577441 | Tumor_G1 |
| 762 | COX15    | 4.377336311 | Tumor_G1 |
| 763 | COX5A    | 6.897695398 | Tumor_G1 |
| 764 | COX6B1   | 8.276096925 | Tumor_G1 |
| 765 | COX6C    | 5.737997899 | Tumor_G1 |
| 766 | COX7A2   | 6.262806481 | Tumor_G1 |
| 767 | COX7B    | 5.721053982 | Tumor_G1 |
| 768 | COX8A    | 9.209760268 | Tumor_G1 |
| 769 | SCO1     | 2.824052556 | Tumor_G1 |
| 770 | SURF1    | 5.618315701 | Tumor_G1 |
| 771 | ATP6V1E1 | 7.015220173 | Tumor_G1 |
| 772 | DLAT     | 4.934912978 | Tumor_G1 |
| 773 | PDC      | 0.267042024 | Tumor_G1 |
| 774 | SUCLG2   | 6.271686107 | Tumor_G1 |
| 775 | SLC25A5  | 8.038996848 | Tumor_G1 |
| 776 | UCP2     | 7.982506771 | Tumor_G1 |
| 777 | SOD2     | 6.095633517 | Tumor_G1 |
| 778 | NOX4     | 2.098547293 | Tumor_G1 |
| 779 | DUOX1    | 6.818948273 | Tumor_G1 |
| 780 | DUOXA1   | 6.263476888 | Tumor_G1 |
| 781 | DUOX2    | 6.724920441 | Tumor_G1 |
| 782 | DUOXA2   | 3.958992043 | Tumor_G1 |
| 783 | NDUFA1   | 7.225130381 | Tumor_G1 |
| 784 | NDUFA2   | 6.376647039 | Tumor_G1 |
| 785 | NDUFA8   | 6.426476801 | Tumor_G1 |
| 786 | NDUFB1   | 5.358111084 | Tumor_G1 |
| 787 | NDUFB10  | 7.030540212 | Tumor_G1 |
| 788 | NDUFB2   | 6.174999365 | Tumor_G1 |
| 789 | NDUFB3   | 5.908099903 | Tumor_G1 |
| 790 | NDUFB7   | 7.973037101 | Tumor_G1 |
| 791 | CYC1     | 6.393684152 | Tumor_G1 |
| 792 | ETFB     | 4.568338031 | Tumor_G1 |
| 793 | UQCR10   | 7.075691444 | Tumor_G1 |
| 794 | UQCRQ    | 6.972700017 | Tumor_G1 |
| 795 | UQCC3    | 3.780222228 | Tumor_G1 |
| 796 | COX15    | 4.46849469  | Tumor_G1 |
| 797 | COX5A    | 6.676683048 | Tumor_G1 |
| 798 | COX6B1   | 8.165432262 | Tumor_G1 |

|     |          |             |          |
|-----|----------|-------------|----------|
| 799 | COX6C    | 5.924630589 | Tumor_G1 |
| 800 | COX7A2   | 6.516923335 | Tumor_G1 |
| 801 | COX7B    | 5.602119802 | Tumor_G1 |
| 802 | COX8A    | 8.863429582 | Tumor_G1 |
| 803 | SCO1     | 2.65845532  | Tumor_G1 |
| 804 | SURF1    | 5.728433321 | Tumor_G1 |
| 805 | ATP6V1E1 | 7.020184141 | Tumor_G1 |
| 806 | DLAT     | 4.950926097 | Tumor_G1 |
| 807 | PDC      | 0.239798426 | Tumor_G1 |
| 808 | SUCLG2   | 6.298156179 | Tumor_G1 |
| 809 | SLC25A5  | 7.817198508 | Tumor_G1 |
| 810 | UCP2     | 7.937214789 | Tumor_G1 |
| 811 | SOD2     | 5.55257484  | Tumor_G1 |
| 812 | NOX4     | 1.987575637 | Tumor_G1 |
| 813 | DUOX1    | 6.384834449 | Tumor_G1 |
| 814 | DUOXA1   | 6.404889565 | Tumor_G1 |
| 815 | DUOX2    | 6.388493057 | Tumor_G1 |
| 816 | DUOXA2   | 4.259639932 | Tumor_G1 |
| 817 | NDUFA1   | 7.335582876 | Tumor_G1 |
| 818 | NDUFA2   | 6.429450358 | Tumor_G1 |
| 819 | NDUFA8   | 6.403000935 | Tumor_G1 |
| 820 | NDUFB1   | 4.996011629 | Tumor_G1 |
| 821 | NDUFB10  | 7.4739702   | Tumor_G1 |
| 822 | NDUFB2   | 5.837906729 | Tumor_G1 |
| 823 | NDUFB3   | 5.579978152 | Tumor_G1 |
| 824 | NDUFB7   | 8.032083031 | Tumor_G1 |
| 825 | CYC1     | 7.046791584 | Tumor_G1 |
| 826 | ETFB     | 4.653933011 | Tumor_G1 |
| 827 | UQCR10   | 6.786889492 | Tumor_G1 |
| 828 | UQCRQ    | 6.628235748 | Tumor_G1 |
| 829 | UQCC3    | 3.369558542 | Tumor_G1 |
| 830 | COX15    | 5.253976591 | Tumor_G1 |
| 831 | COX5A    | 6.805074243 | Tumor_G1 |
| 832 | COX6B1   | 8.287214844 | Tumor_G1 |
| 833 | COX6C    | 5.666102025 | Tumor_G1 |
| 834 | COX7A2   | 6.388645208 | Tumor_G1 |
| 835 | COX7B    | 5.372893785 | Tumor_G1 |
| 836 | COX8A    | 7.917189923 | Tumor_G1 |
| 837 | SCO1     | 3.054613753 | Tumor_G1 |
| 838 | SURF1    | 5.83264132  | Tumor_G1 |

|     |          |             |          |
|-----|----------|-------------|----------|
| 839 | ATP6V1E1 | 7.185535419 | Tumor_G1 |
| 840 | DLAT     | 4.418841129 | Tumor_G1 |
| 841 | PDC      | 0.147782531 | Tumor_G1 |
| 842 | SUCLG2   | 6.676509278 | Tumor_G1 |
| 843 | SLC25A5  | 8.106498981 | Tumor_G1 |
| 844 | UCP2     | 5.914409469 | Tumor_G1 |
| 845 | SOD2     | 4.439486474 | Tumor_G1 |
| 846 | NOX4     | 0.620153027 | Tumor_G1 |
| 847 | DUOX1    | 5.431582642 | Tumor_G1 |
| 848 | DUOXA1   | 5.400359439 | Tumor_G1 |
| 849 | DUOX2    | 4.494159388 | Tumor_G1 |
| 850 | DUOXA2   | 2.504594127 | Tumor_G1 |
| 851 | NDUFA1   | 7.679005786 | Tumor_G1 |
| 852 | NDUFA2   | 6.437277898 | Tumor_G1 |
| 853 | NDUFA8   | 6.70305265  | Tumor_G1 |
| 854 | NDUFB1   | 5.319329287 | Tumor_G1 |
| 855 | NDUFB10  | 7.191915464 | Tumor_G1 |
| 856 | NDUFB2   | 6.072308645 | Tumor_G1 |
| 857 | NDUFB3   | 6.05463813  | Tumor_G1 |
| 858 | NDUFB7   | 8.009680176 | Tumor_G1 |
| 859 | CYC1     | 6.39429489  | Tumor_G1 |
| 860 | ETFB     | 4.358845814 | Tumor_G1 |
| 861 | UQCR10   | 7.332100153 | Tumor_G1 |
| 862 | UQCRQ    | 6.933408871 | Tumor_G1 |
| 863 | UQCC3    | 3.644079517 | Tumor_G1 |
| 864 | COX15    | 4.578404684 | Tumor_G1 |
| 865 | COX5A    | 7.011306154 | Tumor_G1 |
| 866 | COX6B1   | 8.225195249 | Tumor_G1 |
| 867 | COX6C    | 5.939103669 | Tumor_G1 |
| 868 | COX7A2   | 6.544809418 | Tumor_G1 |
| 869 | COX7B    | 5.801695566 | Tumor_G1 |
| 870 | COX8A    | 9.040886508 | Tumor_G1 |
| 871 | SCO1     | 3.177536235 | Tumor_G1 |
| 872 | SURF1    | 5.754023896 | Tumor_G1 |
| 873 | ATP6V1E1 | 7.062111595 | Tumor_G1 |
| 874 | DLAT     | 5.173377688 | Tumor_G1 |
| 875 | PDC      | 0.169720471 | Tumor_G1 |
| 876 | SUCLG2   | 5.990747872 | Tumor_G1 |
| 877 | SLC25A5  | 8.260078099 | Tumor_G1 |
| 878 | UCP2     | 7.721788446 | Tumor_G1 |

|     |          |             |          |
|-----|----------|-------------|----------|
| 879 | SOD2     | 6.577810186 | Tumor_G1 |
| 880 | NOX4     | 3.037708015 | Tumor_G1 |
| 881 | DUOX1    | 5.350893983 | Tumor_G1 |
| 882 | DUOXA1   | 5.433156745 | Tumor_G1 |
| 883 | DUOX2    | 5.012810172 | Tumor_G1 |
| 884 | DUOXA2   | 2.988737311 | Tumor_G1 |
| 885 | NDUFA1   | 8.074238462 | Tumor_G1 |
| 886 | NDUFA2   | 6.986078545 | Tumor_G1 |
| 887 | NDUFA8   | 6.210472593 | Tumor_G1 |
| 888 | NDUFB1   | 5.730450707 | Tumor_G1 |
| 889 | NDUFB10  | 7.330904704 | Tumor_G1 |
| 890 | NDUFB2   | 6.460882528 | Tumor_G1 |
| 891 | NDUFB3   | 6.356516252 | Tumor_G1 |
| 892 | NDUFB7   | 8.782327153 | Tumor_G1 |
| 893 | CYC1     | 6.729868529 | Tumor_G1 |
| 894 | ETFB     | 4.45938183  | Tumor_G1 |
| 895 | UQCR10   | 7.734510776 | Tumor_G1 |
| 896 | UQCRQ    | 7.355271206 | Tumor_G1 |
| 897 | UQCC3    | 4.190692002 | Tumor_G1 |
| 898 | COX15    | 4.070730011 | Tumor_G1 |
| 899 | COX5A    | 6.911795831 | Tumor_G1 |
| 900 | COX6B1   | 8.765335906 | Tumor_G1 |
| 901 | COX6C    | 6.405140172 | Tumor_G1 |
| 902 | COX7A2   | 6.714547931 | Tumor_G1 |
| 903 | COX7B    | 6.042906094 | Tumor_G1 |
| 904 | COX8A    | 9.185605346 | Tumor_G1 |
| 905 | SCO1     | 2.871112013 | Tumor_G1 |
| 906 | SURF1    | 5.146837285 | Tumor_G1 |
| 907 | ATP6V1E1 | 6.961977424 | Tumor_G1 |
| 908 | DLAT     | 4.749967858 | Tumor_G1 |
| 909 | PDC      | 0.085961942 | Tumor_G1 |
| 910 | SUCLG2   | 6.084998423 | Tumor_G1 |
| 911 | SLC25A5  | 7.903301868 | Tumor_G1 |
| 912 | UCP2     | 8.312701108 | Tumor_G1 |
| 913 | SOD2     | 5.161949635 | Tumor_G1 |
| 914 | NOX4     | 2.356101316 | Tumor_G1 |
| 915 | DUOX1    | 4.889380934 | Tumor_G1 |
| 916 | DUOXA1   | 5.179447028 | Tumor_G1 |
| 917 | DUOX2    | 4.521090757 | Tumor_G1 |
| 918 | DUOXA2   | 2.976756025 | Tumor_G1 |

|     |          |             |          |
|-----|----------|-------------|----------|
| 919 | NDUFA1   | 8.147964061 | Tumor_G1 |
| 920 | NDUFA2   | 6.473712109 | Tumor_G1 |
| 921 | NDUFA8   | 6.383997209 | Tumor_G1 |
| 922 | NDUFB1   | 5.694673122 | Tumor_G1 |
| 923 | NDUFB10  | 6.653912467 | Tumor_G1 |
| 924 | NDUFB2   | 5.540993437 | Tumor_G1 |
| 925 | NDUFB3   | 4.696533109 | Tumor_G1 |
| 926 | NDUFB7   | 8.355660247 | Tumor_G1 |
| 927 | CYC1     | 5.577668599 | Tumor_G1 |
| 928 | ETFB     | 3.434462317 | Tumor_G1 |
| 929 | UQCR10   | 7.01757318  | Tumor_G1 |
| 930 | UQCRQ    | 6.56485993  | Tumor_G1 |
| 931 | UQCC3    | 3.275449986 | Tumor_G1 |
| 932 | COX15    | 3.078196919 | Tumor_G1 |
| 933 | COX5A    | 6.179400887 | Tumor_G1 |
| 934 | COX6B1   | 8.356194661 | Tumor_G1 |
| 935 | COX6C    | 6.305580391 | Tumor_G1 |
| 936 | COX7A2   | 5.731374857 | Tumor_G1 |
| 937 | COX7B    | 5.510347391 | Tumor_G1 |
| 938 | COX8A    | 8.232212494 | Tumor_G1 |
| 939 | SCO1     | 1.516955885 | Tumor_G1 |
| 940 | SURF1    | 4.892494301 | Tumor_G1 |
| 941 | ATP6V1E1 | 5.50632703  | Tumor_G1 |
| 942 | DLAT     | 2.714960844 | Tumor_G1 |
| 943 | PDC      | 0           | Tumor_G1 |
| 944 | SUCLG2   | 4.62570321  | Tumor_G1 |
| 945 | SLC25A5  | 6.001481647 | Tumor_G1 |
| 946 | UCP2     | 7.107369699 | Tumor_G1 |
| 947 | SOD2     | 4.734368343 | Tumor_G1 |
| 948 | NOX4     | 0.220494564 | Tumor_G1 |
| 949 | DUOX1    | 3.533868156 | Tumor_G1 |
| 950 | DUOXA1   | 3.252307244 | Tumor_G1 |
| 951 | DUOX2    | 3.514461628 | Tumor_G1 |
| 952 | DUOXA2   | 2.355522216 | Tumor_G1 |
| 953 | NDUFA1   | 7.776318288 | Tumor_G1 |
| 954 | NDUFA2   | 6.345310898 | Tumor_G1 |
| 955 | NDUFA8   | 6.7982902   | Tumor_G1 |
| 956 | NDUFB1   | 5.448917762 | Tumor_G1 |
| 957 | NDUFB10  | 7.560093017 | Tumor_G1 |
| 958 | NDUFB2   | 6.602791678 | Tumor_G1 |



|     |          |             |          |
|-----|----------|-------------|----------|
| 959 | NDUFB3   | 5.884133249 | Tumor_G1 |
| 960 | NDUFB7   | 8.376187211 | Tumor_G1 |
| 961 | CYC1     | 7.299382345 | Tumor_G1 |
| 962 | ETFB     | 4.416374936 | Tumor_G1 |
| 963 | UQCR10   | 7.244765649 | Tumor_G1 |
| 964 | UQCRQ    | 6.732321737 | Tumor_G1 |
| 965 | UQCC3    | 4.256208016 | Tumor_G1 |
| 966 | COX15    | 5.26227034  | Tumor_G1 |
| 967 | COX5A    | 7.217917063 | Tumor_G1 |
| 968 | COX6B1   | 8.462951221 | Tumor_G1 |
| 969 | COX6C    | 6.41170288  | Tumor_G1 |
| 970 | COX7A2   | 6.68812277  | Tumor_G1 |
| 971 | COX7B    | 6.124442033 | Tumor_G1 |
| 972 | COX8A    | 9.594256157 | Tumor_G1 |
| 973 | SCO1     | 3.376814575 | Tumor_G1 |
| 974 | SURF1    | 6.256518774 | Tumor_G1 |
| 975 | ATP6V1E1 | 7.034384375 | Tumor_G1 |
| 976 | DLAT     | 5.378356433 | Tumor_G1 |
| 977 | PDC      | 0.200519417 | Tumor_G1 |
| 978 | SUCLG2   | 6.585212699 | Tumor_G1 |
| 979 | SLC25A5  | 9.048493889 | Tumor_G1 |
| 980 | UCP2     | 6.806094565 | Tumor_G1 |
| 981 | SOD2     | 5.22298234  | Tumor_G1 |
| 982 | NOX4     | 1.171715364 | Tumor_G1 |
| 983 | DUOX1    | 6.346286335 | Tumor_G1 |
| 984 | DUOXA1   | 6.180158551 | Tumor_G1 |
| 985 | DUOX2    | 6.362443569 | Tumor_G1 |
| 986 | DUOXA2   | 3.829008081 | Tumor_G1 |
| 987 | NDUFA1   | 6.420491762 | Tumor_G1 |
| 988 | NDUFA2   | 5.17233424  | Tumor_G1 |
| 989 | NDUFA8   | 5.090362096 | Tumor_G1 |
| 990 | NDUFB1   | 4.529589421 | Tumor_G1 |
| 991 | NDUFB10  | 5.858833238 | Tumor_G1 |
| 992 | NDUFB2   | 4.210197964 | Tumor_G1 |
| 993 | NDUFB3   | 3.209554968 | Tumor_G1 |
| 994 | NDUFB7   | 7.814892599 | Tumor_G1 |
| 995 | CYC1     | 3.773753609 | Tumor_G1 |
| 996 | ETFB     | 3.467246384 | Tumor_G1 |
| 997 | UQCR10   | 6.399689286 | Tumor_G1 |
| 998 | UQCRQ    | 4.98476984  | Tumor_G1 |

|      |          |             |          |
|------|----------|-------------|----------|
| 999  | UQCC3    | 3.583679786 | Tumor_G1 |
| 1000 | COX15    | 2.518597015 | Tumor_G1 |
| 1001 | COX5A    | 3.762525407 | Tumor_G1 |
| 1002 | COX6B1   | 8.369103054 | Tumor_G1 |
| 1003 | COX6C    | 4.894209989 | Tumor_G1 |
| 1004 | COX7A2   | 3.966719364 | Tumor_G1 |
| 1005 | COX7B    | 3.926206508 | Tumor_G1 |
| 1006 | COX8A    | 7.218360478 | Tumor_G1 |
| 1007 | SCO1     | 1.4076836   | Tumor_G1 |
| 1008 | SURF1    | 4.281438883 | Tumor_G1 |
| 1009 | ATP6V1E1 | 3.546164213 | Tumor_G1 |
| 1010 | DLAT     | 1.703317139 | Tumor_G1 |
| 1011 | PDC      | 0           | Tumor_G1 |
| 1012 | SUCLG2   | 2.483092526 | Tumor_G1 |
| 1013 | SLC25A5  | 4.426562827 | Tumor_G1 |
| 1014 | UCP2     | 6.232826917 | Tumor_G1 |
| 1015 | SOD2     | 2.011204622 | Tumor_G1 |
| 1016 | NOX4     | 0.425757633 | Tumor_G1 |
| 1017 | DUOX1    | 6.276327915 | Tumor_G1 |
| 1018 | DUOXA1   | 5.121629463 | Tumor_G1 |
| 1019 | DUOX2    | 5.891422317 | Tumor_G1 |
| 1020 | DUOXA2   | 5.665384897 | Tumor_G1 |
| 1021 | NDUFA1   | 7.585782513 | Tumor_G1 |
| 1022 | NDUFA2   | 6.2451617   | Tumor_G1 |
| 1023 | NDUFA8   | 6.724500147 | Tumor_G1 |
| 1024 | NDUFB1   | 5.131011544 | Tumor_G1 |
| 1025 | NDUFB10  | 7.149214404 | Tumor_G1 |
| 1026 | NDUFB2   | 6.196683968 | Tumor_G1 |
| 1027 | NDUFB3   | 5.987643061 | Tumor_G1 |
| 1028 | NDUFB7   | 8.240378829 | Tumor_G1 |
| 1029 | CYC1     | 6.606213229 | Tumor_G1 |
| 1030 | ETFB     | 4.517057103 | Tumor_G1 |
| 1031 | UQCR10   | 7.175281304 | Tumor_G1 |
| 1032 | UQCRQ    | 6.883071459 | Tumor_G1 |
| 1033 | UQCC3    | 3.728071575 | Tumor_G1 |
| 1034 | COX15    | 4.833466444 | Tumor_G1 |
| 1035 | COX5A    | 6.940397298 | Tumor_G1 |
| 1036 | COX6B1   | 8.298261692 | Tumor_G1 |
| 1037 | COX6C    | 6.18026569  | Tumor_G1 |
| 1038 | COX7A2   | 6.567631918 | Tumor_G1 |

|      |          |             |          |
|------|----------|-------------|----------|
| 1039 | COX7B    | 5.759780503 | Tumor_G1 |
| 1040 | COX8A    | 9.082451941 | Tumor_G1 |
| 1041 | SCO1     | 3.402626446 | Tumor_G1 |
| 1042 | SURF1    | 6.126598537 | Tumor_G1 |
| 1043 | ATP6V1E1 | 7.133624912 | Tumor_G1 |
| 1044 | DLAT     | 5.25712485  | Tumor_G1 |
| 1045 | PDC      | 0.041220521 | Tumor_G1 |
| 1046 | SUCLG2   | 6.362144029 | Tumor_G1 |
| 1047 | SLC25A5  | 8.390333686 | Tumor_G1 |
| 1048 | UCP2     | 8.040515296 | Tumor_G1 |
| 1049 | SOD2     | 5.133721286 | Tumor_G1 |
| 1050 | NOX4     | 1.948044484 | Tumor_G1 |
| 1051 | DUOX1    | 5.822923338 | Tumor_G1 |
| 1052 | DUOXA1   | 5.905678921 | Tumor_G1 |
| 1053 | DUOX2    | 5.61345673  | Tumor_G1 |
| 1054 | DUOXA2   | 2.869115675 | Tumor_G1 |
| 1055 | NDUFA1   | 7.417116943 | Tumor_G1 |
| 1056 | NDUFA2   | 6.376867607 | Tumor_G1 |
| 1057 | NDUFA8   | 6.575646914 | Tumor_G1 |
| 1058 | NDUFB1   | 4.964181899 | Tumor_G1 |
| 1059 | NDUFB10  | 7.30795584  | Tumor_G1 |
| 1060 | NDUFB2   | 5.830325595 | Tumor_G1 |
| 1061 | NDUFB3   | 5.928202343 | Tumor_G1 |
| 1062 | NDUFB7   | 8.200945284 | Tumor_G1 |
| 1063 | CYC1     | 6.509306857 | Tumor_G1 |
| 1064 | ETFB     | 4.274899842 | Tumor_G1 |
| 1065 | UQCR10   | 7.070275994 | Tumor_G1 |
| 1066 | UQCRQ    | 6.763713416 | Tumor_G1 |
| 1067 | UQCC3    | 3.899992076 | Tumor_G1 |
| 1068 | COX15    | 4.840207212 | Tumor_G1 |
| 1069 | COX5A    | 6.903356195 | Tumor_G1 |
| 1070 | COX6B1   | 8.233619339 | Tumor_G1 |
| 1071 | COX6C    | 5.843714548 | Tumor_G1 |
| 1072 | COX7A2   | 6.415790367 | Tumor_G1 |
| 1073 | COX7B    | 5.484562647 | Tumor_G1 |
| 1074 | COX8A    | 8.949560585 | Tumor_G1 |
| 1075 | SCO1     | 3.312208874 | Tumor_G1 |
| 1076 | SURF1    | 5.782586554 | Tumor_G1 |
| 1077 | ATP6V1E1 | 7.12660619  | Tumor_G1 |
| 1078 | DLAT     | 5.443697227 | Tumor_G1 |

|      |          |             |          |
|------|----------|-------------|----------|
| 1079 | PDC      | 0.052125097 | Tumor_G1 |
| 1080 | SUCLG2   | 6.052011449 | Tumor_G1 |
| 1081 | SLC25A5  | 8.109485595 | Tumor_G1 |
| 1082 | UCP2     | 7.929735583 | Tumor_G1 |
| 1083 | SOD2     | 5.591589746 | Tumor_G1 |
| 1084 | NOX4     | 3.066633132 | Tumor_G1 |
| 1085 | DUOX1    | 5.94006302  | Tumor_G1 |
| 1086 | DUOXA1   | 6.072861788 | Tumor_G1 |
| 1087 | DUOX2    | 6.001673012 | Tumor_G1 |
| 1088 | DUOXA2   | 3.927490325 | Tumor_G1 |
| 1089 | NDUFA1   | 7.662197128 | Tumor_G1 |
| 1090 | NDUFA2   | 5.763791216 | Tumor_G1 |
| 1091 | NDUFA8   | 6.651492475 | Tumor_G1 |
| 1092 | NDUFB1   | 5.026354622 | Tumor_G1 |
| 1093 | NDUFB10  | 6.860251366 | Tumor_G1 |
| 1094 | NDUFB2   | 5.76283656  | Tumor_G1 |
| 1095 | NDUFB3   | 5.928864281 | Tumor_G1 |
| 1096 | NDUFB7   | 8.162110842 | Tumor_G1 |
| 1097 | CYC1     | 6.110378903 | Tumor_G1 |
| 1098 | ETFB     | 4.612991717 | Tumor_G1 |
| 1099 | UQCR10   | 7.229966462 | Tumor_G1 |
| 1100 | UQCRQ    | 6.424562609 | Tumor_G1 |
| 1101 | UQCC3    | 3.409742649 | Tumor_G1 |
| 1102 | COX15    | 5.033804495 | Tumor_G1 |
| 1103 | COX5A    | 6.251449372 | Tumor_G1 |
| 1104 | COX6B1   | 8.278569985 | Tumor_G1 |
| 1105 | COX6C    | 5.629503229 | Tumor_G1 |
| 1106 | COX7A2   | 6.179918281 | Tumor_G1 |
| 1107 | COX7B    | 5.717440152 | Tumor_G1 |
| 1108 | COX8A    | 8.511925909 | Tumor_G1 |
| 1109 | SCO1     | 3.362001632 | Tumor_G1 |
| 1110 | SURF1    | 5.705803336 | Tumor_G1 |
| 1111 | ATP6V1E1 | 6.792681906 | Tumor_G1 |
| 1112 | DLAT     | 5.049972565 | Tumor_G1 |
| 1113 | PDC      | 0.189741484 | Tumor_G1 |
| 1114 | SUCLG2   | 6.029227448 | Tumor_G1 |
| 1115 | SLC25A5  | 7.628688788 | Tumor_G1 |
| 1116 | UCP2     | 8.332035803 | Tumor_G1 |
| 1117 | SOD2     | 4.811923183 | Tumor_G1 |
| 1118 | NOX4     | 1.952817241 | Tumor_G1 |

|      |          |             |          |
|------|----------|-------------|----------|
| 1119 | DUOX1    | 6.606282653 | Tumor_G1 |
| 1120 | DUOXA1   | 6.432896633 | Tumor_G1 |
| 1121 | DUOX2    | 7.077723544 | Tumor_G1 |
| 1122 | DUOXA2   | 4.628118512 | Tumor_G1 |
| 1123 | NDUFA1   | 7.842974007 | Tumor_G1 |
| 1124 | NDUFA2   | 6.00851895  | Tumor_G1 |
| 1125 | NDUFA8   | 6.833178854 | Tumor_G1 |
| 1126 | NDUFB1   | 5.771169534 | Tumor_G1 |
| 1127 | NDUFB10  | 6.959459454 | Tumor_G1 |
| 1128 | NDUFB2   | 6.096919465 | Tumor_G1 |
| 1129 | NDUFB3   | 5.952999844 | Tumor_G1 |
| 1130 | NDUFB7   | 8.296677507 | Tumor_G1 |
| 1131 | CYC1     | 6.695327671 | Tumor_G1 |
| 1132 | ETFB     | 4.378646017 | Tumor_G1 |
| 1133 | UQCR10   | 6.629841249 | Tumor_G1 |
| 1134 | UQCRQ    | 7.059847265 | Tumor_G1 |
| 1135 | UQCC3    | 3.575485228 | Tumor_G1 |
| 1136 | COX15    | 4.592583748 | Tumor_G1 |
| 1137 | COX5A    | 6.840197997 | Tumor_G1 |
| 1138 | COX6B1   | 8.637243856 | Tumor_G1 |
| 1139 | COX6C    | 6.163998019 | Tumor_G1 |
| 1140 | COX7A2   | 6.394887112 | Tumor_G1 |
| 1141 | COX7B    | 6.243829024 | Tumor_G1 |
| 1142 | COX8A    | 8.675848346 | Tumor_G1 |
| 1143 | SCO1     | 2.931219126 | Tumor_G1 |
| 1144 | SURF1    | 4.930297303 | Tumor_G1 |
| 1145 | ATP6V1E1 | 5.623721126 | Tumor_G1 |
| 1146 | DLAT     | 4.806687479 | Tumor_G1 |
| 1147 | PDC      | 0           | Tumor_G1 |
| 1148 | SUCLG2   | 6.187607151 | Tumor_G1 |
| 1149 | SLC25A5  | 8.226891461 | Tumor_G1 |
| 1150 | UCP2     | 7.216256087 | Tumor_G1 |
| 1151 | SOD2     | 3.903299032 | Tumor_G1 |
| 1152 | NOX4     | 0.956630604 | Tumor_G1 |
| 1153 | DUOX1    | 6.75867079  | Tumor_G1 |
| 1154 | DUOXA1   | 6.517126567 | Tumor_G1 |
| 1155 | DUOX2    | 8.763815033 | Tumor_G1 |
| 1156 | DUOXA2   | 6.031664542 | Tumor_G1 |
| 1157 | NDUFA1   | 7.644800707 | Tumor_G1 |
| 1158 | NDUFA2   | 6.433371663 | Tumor_G1 |

|      |          |             |          |
|------|----------|-------------|----------|
| 1159 | NDUFA8   | 6.945333509 | Tumor_G1 |
| 1160 | NDUFB1   | 5.172466926 | Tumor_G1 |
| 1161 | NDUFB10  | 7.444453095 | Tumor_G1 |
| 1162 | NDUFB2   | 6.699442759 | Tumor_G1 |
| 1163 | NDUFB3   | 6.121180188 | Tumor_G1 |
| 1164 | NDUFB7   | 8.516312614 | Tumor_G1 |
| 1165 | CYC1     | 7.058441361 | Tumor_G1 |
| 1166 | ETFB     | 4.766358648 | Tumor_G1 |
| 1167 | UQCR10   | 7.431625042 | Tumor_G1 |
| 1168 | UQCRQ    | 7.055344204 | Tumor_G1 |
| 1169 | UQCC3    | 3.896098162 | Tumor_G1 |
| 1170 | COX15    | 4.730695557 | Tumor_G1 |
| 1171 | COX5A    | 7.287489253 | Tumor_G1 |
| 1172 | COX6B1   | 8.591501866 | Tumor_G1 |
| 1173 | COX6C    | 6.252915742 | Tumor_G1 |
| 1174 | COX7A2   | 6.715901852 | Tumor_G1 |
| 1175 | COX7B    | 5.878938713 | Tumor_G1 |
| 1176 | COX8A    | 9.490809546 | Tumor_G1 |
| 1177 | SCO1     | 3.284104301 | Tumor_G1 |
| 1178 | SURF1    | 6.453709673 | Tumor_G1 |
| 1179 | ATP6V1E1 | 7.076009473 | Tumor_G1 |
| 1180 | DLAT     | 5.312437492 | Tumor_G1 |
| 1181 | PDC      | 0.062476323 | Tumor_G1 |
| 1182 | SUCLG2   | 6.420077799 | Tumor_G1 |
| 1183 | SLC25A5  | 8.978737531 | Tumor_G1 |
| 1184 | UCP2     | 8.926080965 | Tumor_G1 |
| 1185 | SOD2     | 5.721258302 | Tumor_G1 |
| 1186 | NOX4     | 1.99786676  | Tumor_G1 |
| 1187 | DUOX1    | 5.4441213   | Tumor_G1 |
| 1188 | DUOXA1   | 5.468264394 | Tumor_G1 |
| 1189 | DUOX2    | 5.09377165  | Tumor_G1 |
| 1190 | DUOXA2   | 3.267745113 | Tumor_G1 |
| 1191 | NDUFA1   | 7.61349758  | Tumor_G1 |
| 1192 | NDUFA2   | 6.014105166 | Tumor_G1 |
| 1193 | NDUFA8   | 6.893437143 | Tumor_G1 |
| 1194 | NDUFB1   | 5.125886464 | Tumor_G1 |
| 1195 | NDUFB10  | 7.238606002 | Tumor_G1 |
| 1196 | NDUFB2   | 5.515619088 | Tumor_G1 |
| 1197 | NDUFB3   | 5.961097261 | Tumor_G1 |
| 1198 | NDUFB7   | 8.356484909 | Tumor_G1 |

|      |          |             |          |
|------|----------|-------------|----------|
| 1199 | CYC1     | 6.256896001 | Tumor_G1 |
| 1200 | ETFB     | 4.525924062 | Tumor_G1 |
| 1201 | UQCR10   | 7.240260283 | Tumor_G1 |
| 1202 | UQCRQ    | 6.703935078 | Tumor_G1 |
| 1203 | UQCC3    | 3.753065049 | Tumor_G1 |
| 1204 | COX15    | 5.049204988 | Tumor_G1 |
| 1205 | COX5A    | 6.724305688 | Tumor_G1 |
| 1206 | COX6B1   | 8.68397903  | Tumor_G1 |
| 1207 | COX6C    | 5.772101443 | Tumor_G1 |
| 1208 | COX7A2   | 6.541426622 | Tumor_G1 |
| 1209 | COX7B    | 5.853311086 | Tumor_G1 |
| 1210 | COX8A    | 8.739438933 | Tumor_G1 |
| 1211 | SCO1     | 3.507099832 | Tumor_G1 |
| 1212 | SURF1    | 6.085034678 | Tumor_G1 |
| 1213 | ATP6V1E1 | 6.593178549 | Tumor_G1 |
| 1214 | DLAT     | 5.500879648 | Tumor_G1 |
| 1215 | PDC      | 0.295903586 | Tumor_G1 |
| 1216 | SUCLG2   | 6.21829146  | Tumor_G1 |
| 1217 | SLC25A5  | 8.086882885 | Tumor_G1 |
| 1218 | UCP2     | 8.734864096 | Tumor_G1 |
| 1219 | SOD2     | 4.811166672 | Tumor_G1 |
| 1220 | NOX4     | 2.994696538 | Tumor_G1 |
| 1221 | DUOX1    | 7.105683372 | Tumor_G1 |
| 1222 | DUOXA1   | 7.016458302 | Tumor_G1 |
| 1223 | DUOX2    | 7.825614565 | Tumor_G1 |
| 1224 | DUOXA2   | 5.13287664  | Tumor_G1 |
| 1225 | NDUFA1   | 7.751446838 | Tumor_G1 |
| 1226 | NDUFA2   | 6.568003069 | Tumor_G1 |
| 1227 | NDUFA8   | 6.91586711  | Tumor_G1 |
| 1228 | NDUFB1   | 5.25113913  | Tumor_G1 |
| 1229 | NDUFB10  | 7.185388072 | Tumor_G1 |
| 1230 | NDUFB2   | 6.28444038  | Tumor_G1 |
| 1231 | NDUFB3   | 5.985074005 | Tumor_G1 |
| 1232 | NDUFB7   | 8.357416274 | Tumor_G1 |
| 1233 | CYC1     | 6.916129261 | Tumor_G1 |
| 1234 | ETFB     | 5.100399908 | Tumor_G1 |
| 1235 | UQCR10   | 7.54904388  | Tumor_G1 |
| 1236 | UQCRQ    | 6.883250109 | Tumor_G1 |
| 1237 | UQCC3    | 4.379832466 | Tumor_G1 |
| 1238 | COX15    | 5.144820289 | Tumor_G1 |

|      |          |             |          |
|------|----------|-------------|----------|
| 1239 | COX5A    | 6.662815802 | Tumor_G1 |
| 1240 | COX6B1   | 8.363288906 | Tumor_G1 |
| 1241 | COX6C    | 6.177581328 | Tumor_G1 |
| 1242 | COX7A2   | 6.501153983 | Tumor_G1 |
| 1243 | COX7B    | 5.783247734 | Tumor_G1 |
| 1244 | COX8A    | 9.303291926 | Tumor_G1 |
| 1245 | SCO1     | 3.386282905 | Tumor_G1 |
| 1246 | SURF1    | 6.106018608 | Tumor_G1 |
| 1247 | ATP6V1E1 | 6.868194024 | Tumor_G1 |
| 1248 | DLAT     | 5.092210177 | Tumor_G1 |
| 1249 | PDC      | 0.124139527 | Tumor_G1 |
| 1250 | SUCLG2   | 6.256310003 | Tumor_G1 |
| 1251 | SLC25A5  | 8.026185642 | Tumor_G1 |
| 1252 | UCP2     | 8.155180142 | Tumor_G1 |
| 1253 | SOD2     | 5.632355532 | Tumor_G1 |
| 1254 | NOX4     | 2.086377095 | Tumor_G1 |
| 1255 | DUOX1    | 6.583510325 | Tumor_G1 |
| 1256 | DUOXA1   | 6.520632103 | Tumor_G1 |
| 1257 | DUOX2    | 6.985023848 | Tumor_G1 |
| 1258 | DUOXA2   | 4.750100367 | Tumor_G1 |
| 1259 | NDUFA1   | 7.484590016 | Tumor_G1 |
| 1260 | NDUFA2   | 6.258493719 | Tumor_G1 |
| 1261 | NDUFA8   | 6.852770864 | Tumor_G1 |
| 1262 | NDUFB1   | 5.092613623 | Tumor_G1 |
| 1263 | NDUFB10  | 7.37571625  | Tumor_G1 |
| 1264 | NDUFB2   | 5.62272391  | Tumor_G1 |
| 1265 | NDUFB3   | 5.851542463 | Tumor_G1 |
| 1266 | NDUFB7   | 8.193742264 | Tumor_G1 |
| 1267 | CYC1     | 6.761521358 | Tumor_G1 |
| 1268 | ETFB     | 4.917356915 | Tumor_G1 |
| 1269 | UQCR10   | 7.087582201 | Tumor_G1 |
| 1270 | UQCRQ    | 6.640967017 | Tumor_G1 |
| 1271 | UQCC3    | 4.21910324  | Tumor_G1 |
| 1272 | COX15    | 5.217287897 | Tumor_G1 |
| 1273 | COX5A    | 6.632005773 | Tumor_G1 |
| 1274 | COX6B1   | 8.210836879 | Tumor_G1 |
| 1275 | COX6C    | 5.861058341 | Tumor_G1 |
| 1276 | COX7A2   | 6.515352788 | Tumor_G1 |
| 1277 | COX7B    | 5.767054108 | Tumor_G1 |
| 1278 | COX8A    | 8.992205653 | Tumor_G1 |



|      |          |             |          |
|------|----------|-------------|----------|
| 1279 | SCO1     | 3.587452338 | Tumor_G1 |
| 1280 | SURF1    | 6.40394658  | Tumor_G1 |
| 1281 | ATP6V1E1 | 6.761896891 | Tumor_G1 |
| 1282 | DLAT     | 5.468100189 | Tumor_G1 |
| 1283 | PDC      | 0           | Tumor_G1 |
| 1284 | SUCLG2   | 6.210087588 | Tumor_G1 |
| 1285 | SLC25A5  | 8.13342033  | Tumor_G1 |
| 1286 | UCP2     | 7.805689769 | Tumor_G1 |
| 1287 | SOD2     | 6.68771664  | Tumor_G1 |
| 1288 | NOX4     | 3.026262797 | Tumor_G1 |
| 1289 | DUOX1    | 7.170731135 | Tumor_G1 |
| 1290 | DUOXA1   | 7.17402817  | Tumor_G1 |
| 1291 | DUOX2    | 7.586840625 | Tumor_G1 |
| 1292 | DUOXA2   | 4.422315745 | Tumor_G1 |
| 1293 | NDUFA1   | 7.413838497 | Tumor_G1 |
| 1294 | NDUFA2   | 6.223504917 | Tumor_G1 |
| 1295 | NDUFA8   | 6.827369522 | Tumor_G1 |
| 1296 | NDUFB1   | 4.957045895 | Tumor_G1 |
| 1297 | NDUFB10  | 7.198458651 | Tumor_G1 |
| 1298 | NDUFB2   | 6.082546039 | Tumor_G1 |
| 1299 | NDUFB3   | 5.869362636 | Tumor_G1 |
| 1300 | NDUFB7   | 8.216275581 | Tumor_G1 |
| 1301 | CYC1     | 6.707678452 | Tumor_G1 |
| 1302 | ETFB     | 4.73024626  | Tumor_G1 |
| 1303 | UQCR10   | 7.191238518 | Tumor_G1 |
| 1304 | UQCRQ    | 6.638410077 | Tumor_G1 |
| 1305 | UQCC3    | 4.220085285 | Tumor_G1 |
| 1306 | COX15    | 5.181495643 | Tumor_G1 |
| 1307 | COX5A    | 6.514895959 | Tumor_G1 |
| 1308 | COX6B1   | 8.31088478  | Tumor_G1 |
| 1309 | COX6C    | 5.937678151 | Tumor_G1 |
| 1310 | COX7A2   | 6.383733675 | Tumor_G1 |
| 1311 | COX7B    | 5.560162778 | Tumor_G1 |
| 1312 | COX8A    | 9.285845776 | Tumor_G1 |
| 1313 | SCO1     | 3.614817755 | Tumor_G1 |
| 1314 | SURF1    | 6.392947341 | Tumor_G1 |
| 1315 | ATP6V1E1 | 6.84508814  | Tumor_G1 |
| 1316 | DLAT     | 5.405920665 | Tumor_G1 |
| 1317 | PDC      | 0.187691317 | Tumor_G1 |
| 1318 | SUCLG2   | 5.972984638 | Tumor_G1 |

|      |          |             |          |
|------|----------|-------------|----------|
| 1319 | SLC25A5  | 8.084601755 | Tumor_G1 |
| 1320 | UCP2     | 8.556983355 | Tumor_G1 |
| 1321 | SOD2     | 5.190199661 | Tumor_G1 |
| 1322 | NOX4     | 2.367560079 | Tumor_G1 |
| 1323 | DUOX1    | 6.755810688 | Tumor_G1 |
| 1324 | DUOXA1   | 6.846668732 | Tumor_G1 |
| 1325 | DUOX2    | 8.0005845   | Tumor_G1 |
| 1326 | DUOXA2   | 5.770510134 | Tumor_G1 |
| 1327 | NDUFA1   | 7.924529571 | Tumor_G1 |
| 1328 | NDUFA2   | 6.354330657 | Tumor_G1 |
| 1329 | NDUFA8   | 6.938961497 | Tumor_G1 |
| 1330 | NDUFB1   | 5.543430828 | Tumor_G1 |
| 1331 | NDUFB10  | 7.247903409 | Tumor_G1 |
| 1332 | NDUFB2   | 6.339884864 | Tumor_G1 |
| 1333 | NDUFB3   | 6.132950415 | Tumor_G1 |
| 1334 | NDUFB7   | 8.065921251 | Tumor_G1 |
| 1335 | CYC1     | 6.71900684  | Tumor_G1 |
| 1336 | ETFB     | 4.511539155 | Tumor_G1 |
| 1337 | UQCR10   | 7.325729502 | Tumor_G1 |
| 1338 | UQCRQ    | 7.071120282 | Tumor_G1 |
| 1339 | UQCC3    | 3.591238211 | Tumor_G1 |
| 1340 | COX15    | 5.065795969 | Tumor_G1 |
| 1341 | COX5A    | 7.2048086   | Tumor_G1 |
| 1342 | COX6B1   | 8.578576404 | Tumor_G1 |
| 1343 | COX6C    | 6.506514032 | Tumor_G1 |
| 1344 | COX7A2   | 6.768961878 | Tumor_G1 |
| 1345 | COX7B    | 5.990913368 | Tumor_G1 |
| 1346 | COX8A    | 8.830054281 | Tumor_G1 |
| 1347 | SCO1     | 3.180673815 | Tumor_G1 |
| 1348 | SURF1    | 6.25369982  | Tumor_G1 |
| 1349 | ATP6V1E1 | 7.178183083 | Tumor_G1 |
| 1350 | DLAT     | 5.471881686 | Tumor_G1 |
| 1351 | PDC      | 0.190145468 | Tumor_G1 |
| 1352 | SUCLG2   | 6.402141761 | Tumor_G1 |
| 1353 | SLC25A5  | 8.056492038 | Tumor_G1 |
| 1354 | UCP2     | 8.392044268 | Tumor_G1 |
| 1355 | SOD2     | 6.022220831 | Tumor_G1 |
| 1356 | NOX4     | 3.11930076  | Tumor_G1 |
| 1357 | DUOX1    | 5.489171392 | Tumor_G1 |
| 1358 | DUOXA1   | 6.109741543 | Tumor_G1 |

|      |          |             |          |
|------|----------|-------------|----------|
| 1359 | DUOX2    | 6.188306639 | Tumor_G1 |
| 1360 | DUOXA2   | 3.522058255 | Tumor_G1 |
| 1361 | NDUFA1   | 7.767300394 | Tumor_G1 |
| 1362 | NDUFA2   | 6.564710014 | Tumor_G1 |
| 1363 | NDUFA8   | 6.855949907 | Tumor_G1 |
| 1364 | NDUFB1   | 5.572143442 | Tumor_G1 |
| 1365 | NDUFB10  | 7.361443426 | Tumor_G1 |
| 1366 | NDUFB2   | 6.304406309 | Tumor_G1 |
| 1367 | NDUFB3   | 6.03116474  | Tumor_G1 |
| 1368 | NDUFB7   | 8.442662717 | Tumor_G1 |
| 1369 | CYC1     | 6.721112551 | Tumor_G1 |
| 1370 | ETFB     | 5.051804008 | Tumor_G1 |
| 1371 | UQCR10   | 7.369698112 | Tumor_G1 |
| 1372 | UQCRQ    | 7.023261596 | Tumor_G1 |
| 1373 | UQCC3    | 4.326420161 | Tumor_G1 |
| 1374 | COX15    | 4.801821776 | Tumor_G1 |
| 1375 | COX5A    | 6.879178569 | Tumor_G1 |
| 1376 | COX6B1   | 8.591333782 | Tumor_G1 |
| 1377 | COX6C    | 6.462310302 | Tumor_G1 |
| 1378 | COX7A2   | 6.734373666 | Tumor_G1 |
| 1379 | COX7B    | 5.857944217 | Tumor_G1 |
| 1380 | COX8A    | 9.525471611 | Tumor_G1 |
| 1381 | SCO1     | 3.007938824 | Tumor_G1 |
| 1382 | SURF1    | 6.095217493 | Tumor_G1 |
| 1383 | ATP6V1E1 | 7.145343527 | Tumor_G1 |
| 1384 | DLAT     | 5.011489715 | Tumor_G1 |
| 1385 | PDC      | 0           | Tumor_G1 |
| 1386 | SUCLG2   | 6.286905707 | Tumor_G1 |
| 1387 | SLC25A5  | 8.123194944 | Tumor_G1 |
| 1388 | UCP2     | 7.67936974  | Tumor_G1 |
| 1389 | SOD2     | 5.416929472 | Tumor_G1 |
| 1390 | NOX4     | 2.039253612 | Tumor_G1 |
| 1391 | DUOX1    | 5.616714537 | Tumor_G1 |
| 1392 | DUOXA1   | 5.760304487 | Tumor_G1 |
| 1393 | DUOX2    | 5.163227551 | Tumor_G1 |
| 1394 | DUOXA2   | 3.418076325 | Tumor_G1 |
| 1395 | NDUFA1   | 7.868841979 | Tumor_G1 |
| 1396 | NDUFA2   | 7.130263425 | Tumor_G1 |
| 1397 | NDUFA8   | 7.127323551 | Tumor_G1 |
| 1398 | NDUFB1   | 5.847612329 | Tumor_G1 |

|      |          |             |          |
|------|----------|-------------|----------|
| 1399 | NDUFB10  | 7.469359789 | Tumor_G1 |
| 1400 | NDUFB2   | 5.904258232 | Tumor_G1 |
| 1401 | NDUFB3   | 5.850941332 | Tumor_G1 |
| 1402 | NDUFB7   | 8.681426046 | Tumor_G1 |
| 1403 | CYC1     | 6.340239669 | Tumor_G1 |
| 1404 | ETFB     | 4.988957559 | Tumor_G1 |
| 1405 | UQCR10   | 7.535481328 | Tumor_G1 |
| 1406 | UQCRQ    | 7.430279124 | Tumor_G1 |
| 1407 | UQCC3    | 4.179255677 | Tumor_G1 |
| 1408 | COX15    | 4.14904883  | Tumor_G1 |
| 1409 | COX5A    | 6.794602031 | Tumor_G1 |
| 1410 | COX6B1   | 9.127412895 | Tumor_G1 |
| 1411 | COX6C    | 6.441621957 | Tumor_G1 |
| 1412 | COX7A2   | 6.595284974 | Tumor_G1 |
| 1413 | COX7B    | 6.154587232 | Tumor_G1 |
| 1414 | COX8A    | 8.521302652 | Tumor_G1 |
| 1415 | SCO1     | 2.603447304 | Tumor_G1 |
| 1416 | SURF1    | 6.306282151 | Tumor_G1 |
| 1417 | ATP6V1E1 | 6.326240996 | Tumor_G1 |
| 1418 | DLAT     | 4.192827391 | Tumor_G1 |
| 1419 | PDC      | 0           | Tumor_G1 |
| 1420 | SUCLG2   | 5.341374762 | Tumor_G1 |
| 1421 | SLC25A5  | 7.5747568   | Tumor_G1 |
| 1422 | UCP2     | 6.945869579 | Tumor_G1 |
| 1423 | SOD2     | 5.444523817 | Tumor_G1 |
| 1424 | NOX4     | 2.069584502 | Tumor_G1 |
| 1425 | DUOX1    | 3.273378219 | Tumor_G1 |
| 1426 | DUOXA1   | 3.971134677 | Tumor_G1 |
| 1427 | DUOX2    | 1.748851439 | Tumor_G1 |
| 1428 | DUOXA2   | 1.279281105 | Tumor_G1 |
| 1429 | NDUFA1   | 7.773588667 | Tumor_G1 |
| 1430 | NDUFA2   | 6.258945213 | Tumor_G1 |
| 1431 | NDUFA8   | 6.837278552 | Tumor_G1 |
| 1432 | NDUFB1   | 5.339854836 | Tumor_G1 |
| 1433 | NDUFB10  | 7.024087995 | Tumor_G1 |
| 1434 | NDUFB2   | 6.185251596 | Tumor_G1 |
| 1435 | NDUFB3   | 6.296051967 | Tumor_G1 |
| 1436 | NDUFB7   | 8.226083691 | Tumor_G1 |
| 1437 | CYC1     | 6.612011265 | Tumor_G1 |
| 1438 | ETFB     | 4.88467557  | Tumor_G1 |

|      |          |             |          |
|------|----------|-------------|----------|
| 1439 | UQCR10   | 7.448948615 | Tumor_G1 |
| 1440 | UQCRQ    | 6.826559228 | Tumor_G1 |
| 1441 | UQCC3    | 3.774012511 | Tumor_G1 |
| 1442 | COX15    | 5.045721016 | Tumor_G1 |
| 1443 | COX5A    | 6.965729041 | Tumor_G1 |
| 1444 | COX6B1   | 8.479334076 | Tumor_G1 |
| 1445 | COX6C    | 6.160447771 | Tumor_G1 |
| 1446 | COX7A2   | 6.708234851 | Tumor_G1 |
| 1447 | COX7B    | 5.977445628 | Tumor_G1 |
| 1448 | COX8A    | 8.965613069 | Tumor_G1 |
| 1449 | SCO1     | 3.370695535 | Tumor_G1 |
| 1450 | SURF1    | 5.969281338 | Tumor_G1 |
| 1451 | ATP6V1E1 | 7.021310498 | Tumor_G1 |
| 1452 | DLAT     | 5.190676669 | Tumor_G1 |
| 1453 | PDC      | 0.232271048 | Tumor_G1 |
| 1454 | SUCLG2   | 6.223084424 | Tumor_G1 |
| 1455 | SLC25A5  | 8.416427871 | Tumor_G1 |
| 1456 | UCP2     | 7.860062029 | Tumor_G1 |
| 1457 | SOD2     | 5.674796609 | Tumor_G1 |
| 1458 | NOX4     | 2.971322608 | Tumor_G1 |
| 1459 | DUOX1    | 6.07004175  | Tumor_G1 |
| 1460 | DUOXA1   | 5.999429693 | Tumor_G1 |
| 1461 | DUOX2    | 6.576307362 | Tumor_G1 |
| 1462 | DUOXA2   | 4.193275566 | Tumor_G1 |
| 1463 | NDUFA1   | 7.963494569 | Tumor_G1 |
| 1464 | NDUFA2   | 6.561714906 | Tumor_G1 |
| 1465 | NDUFA8   | 7.084040091 | Tumor_G1 |
| 1466 | NDUFB1   | 5.539284905 | Tumor_G1 |
| 1467 | NDUFB10  | 7.566889388 | Tumor_G1 |
| 1468 | NDUFB2   | 6.047881144 | Tumor_G1 |
| 1469 | NDUFB3   | 6.230951468 | Tumor_G1 |
| 1470 | NDUFB7   | 8.507334821 | Tumor_G1 |
| 1471 | CYC1     | 6.376439144 | Tumor_G1 |
| 1472 | ETFB     | 4.719808051 | Tumor_G1 |
| 1473 | UQCR10   | 7.418182945 | Tumor_G1 |
| 1474 | UQCRQ    | 7.240777671 | Tumor_G1 |
| 1475 | UQCC3    | 3.965607418 | Tumor_G1 |
| 1476 | COX15    | 4.658173267 | Tumor_G1 |
| 1477 | COX5A    | 7.230938644 | Tumor_G1 |
| 1478 | COX6B1   | 8.715023477 | Tumor_G1 |

|      |          |             |          |
|------|----------|-------------|----------|
| 1479 | COX6C    | 6.46837085  | Tumor_G1 |
| 1480 | COX7A2   | 6.89169371  | Tumor_G1 |
| 1481 | COX7B    | 6.018131511 | Tumor_G1 |
| 1482 | COX8A    | 9.100319952 | Tumor_G1 |
| 1483 | SCO1     | 3.296612611 | Tumor_G1 |
| 1484 | SURF1    | 6.246975523 | Tumor_G1 |
| 1485 | ATP6V1E1 | 7.039897423 | Tumor_G1 |
| 1486 | DLAT     | 5.279167831 | Tumor_G1 |
| 1487 | PDC      | 0.11884254  | Tumor_G1 |
| 1488 | SUCLG2   | 5.970162142 | Tumor_G1 |
| 1489 | SLC25A5  | 7.688509924 | Tumor_G1 |
| 1490 | UCP2     | 8.837434932 | Tumor_G1 |
| 1491 | SOD2     | 5.169803501 | Tumor_G1 |
| 1492 | NOX4     | 3.883773944 | Tumor_G1 |
| 1493 | DUOX1    | 5.854969601 | Tumor_G1 |
| 1494 | DUOXA1   | 6.350173084 | Tumor_G1 |
| 1495 | DUOX2    | 6.914187835 | Tumor_G1 |
| 1496 | DUOXA2   | 4.773437165 | Tumor_G1 |
| 1497 | NDUFA1   | 7.912465048 | Tumor_G1 |
| 1498 | NDUFA2   | 6.348037184 | Tumor_G1 |
| 1499 | NDUFA8   | 7.045285074 | Tumor_G1 |
| 1500 | NDUFB1   | 5.317160225 | Tumor_G1 |
| 1501 | NDUFB10  | 7.254185502 | Tumor_G1 |
| 1502 | NDUFB2   | 5.771087239 | Tumor_G1 |
| 1503 | NDUFB3   | 6.360565924 | Tumor_G1 |
| 1504 | NDUFB7   | 8.272075464 | Tumor_G1 |
| 1505 | CYC1     | 6.730050166 | Tumor_G1 |
| 1506 | ETFB     | 4.61993984  | Tumor_G1 |
| 1507 | UQCR10   | 7.366729749 | Tumor_G1 |
| 1508 | UQCRQ    | 7.065789236 | Tumor_G1 |
| 1509 | UQCC3    | 3.685044647 | Tumor_G1 |
| 1510 | COX15    | 5.056472096 | Tumor_G1 |
| 1511 | COX5A    | 7.235229724 | Tumor_G1 |
| 1512 | COX6B1   | 8.484151709 | Tumor_G1 |
| 1513 | COX6C    | 6.291302175 | Tumor_G1 |
| 1514 | COX7A2   | 6.719134097 | Tumor_G1 |
| 1515 | COX7B    | 5.988923138 | Tumor_G1 |
| 1516 | COX8A    | 9.077973016 | Tumor_G1 |
| 1517 | SCO1     | 3.732919574 | Tumor_G1 |
| 1518 | SURF1    | 5.804256372 | Tumor_G1 |

|      |          |             |          |
|------|----------|-------------|----------|
| 1519 | ATP6V1E1 | 7.011351634 | Tumor_G1 |
| 1520 | DLAT     | 5.186847181 | Tumor_G1 |
| 1521 | PDC      | 0           | Tumor_G1 |
| 1522 | SUCLG2   | 6.149053116 | Tumor_G1 |
| 1523 | SLC25A5  | 9.034731577 | Tumor_G1 |
| 1524 | UCP2     | 7.750346227 | Tumor_G1 |
| 1525 | SOD2     | 6.39782187  | Tumor_G1 |
| 1526 | NOX4     | 3.560146448 | Tumor_G1 |
| 1527 | DUOX1    | 4.808100642 | Tumor_G1 |
| 1528 | DUOXA1   | 4.770074829 | Tumor_G1 |
| 1529 | DUOX2    | 4.137213782 | Tumor_G1 |
| 1530 | DUOXA2   | 2.606314437 | Tumor_G1 |
| 1531 | NDUFA1   | 7.725642496 | Tumor_G1 |
| 1532 | NDUFA2   | 6.643867724 | Tumor_G1 |
| 1533 | NDUFA8   | 6.858840449 | Tumor_G1 |
| 1534 | NDUFB1   | 5.27503258  | Tumor_G1 |
| 1535 | NDUFB10  | 7.264644314 | Tumor_G1 |
| 1536 | NDUFB2   | 6.554764529 | Tumor_G1 |
| 1537 | NDUFB3   | 6.220026308 | Tumor_G1 |
| 1538 | NDUFB7   | 8.518826741 | Tumor_G1 |
| 1539 | CYC1     | 6.826606683 | Tumor_G1 |
| 1540 | ETFB     | 4.667101906 | Tumor_G1 |
| 1541 | UQCR10   | 7.439933535 | Tumor_G1 |
| 1542 | UQCRQ    | 7.082033827 | Tumor_G1 |
| 1543 | UQCC3    | 3.911404934 | Tumor_G1 |
| 1544 | COX15    | 4.724715999 | Tumor_G1 |
| 1545 | COX5A    | 6.770923198 | Tumor_G1 |
| 1546 | COX6B1   | 8.716758096 | Tumor_G1 |
| 1547 | COX6C    | 6.329539436 | Tumor_G1 |
| 1548 | COX7A2   | 6.731476847 | Tumor_G1 |
| 1549 | COX7B    | 5.862947886 | Tumor_G1 |
| 1550 | COX8A    | 9.049283288 | Tumor_G1 |
| 1551 | SCO1     | 3.203884272 | Tumor_G1 |
| 1552 | SURF1    | 6.181466338 | Tumor_G1 |
| 1553 | ATP6V1E1 | 7.291714688 | Tumor_G1 |
| 1554 | DLAT     | 5.070340071 | Tumor_G1 |
| 1555 | PDC      | 0.10614446  | Tumor_G1 |
| 1556 | SUCLG2   | 6.161916792 | Tumor_G1 |
| 1557 | SLC25A5  | 8.477430652 | Tumor_G1 |
| 1558 | UCP2     | 8.342525761 | Tumor_G1 |

|      |          |             |          |
|------|----------|-------------|----------|
| 1559 | SOD2     | 5.555396234 | Tumor_G1 |
| 1560 | NOX4     | 3.985631342 | Tumor_G1 |
| 1561 | DUOX1    | 6.074338828 | Tumor_G1 |
| 1562 | DUOXA1   | 6.315735644 | Tumor_G1 |
| 1563 | DUOX2    | 5.395529232 | Tumor_G1 |
| 1564 | DUOXA2   | 3.281840763 | Tumor_G1 |
| 1565 | NDUFA1   | 7.63139356  | Tumor_G1 |
| 1566 | NDUFA2   | 6.350319277 | Tumor_G1 |
| 1567 | NDUFA8   | 6.50994713  | Tumor_G1 |
| 1568 | NDUFB1   | 5.3763353   | Tumor_G1 |
| 1569 | NDUFB10  | 7.070287285 | Tumor_G1 |
| 1570 | NDUFB2   | 5.91482246  | Tumor_G1 |
| 1571 | NDUFB3   | 5.946993142 | Tumor_G1 |
| 1572 | NDUFB7   | 8.234348699 | Tumor_G1 |
| 1573 | CYC1     | 6.261915042 | Tumor_G1 |
| 1574 | ETFB     | 4.595823716 | Tumor_G1 |
| 1575 | UQCR10   | 7.112726476 | Tumor_G1 |
| 1576 | UQCRQ    | 6.934949269 | Tumor_G1 |
| 1577 | UQCC3    | 3.993036845 | Tumor_G1 |
| 1578 | COX15    | 4.01398574  | Tumor_G1 |
| 1579 | COX5A    | 6.718187161 | Tumor_G1 |
| 1580 | COX6B1   | 8.314803967 | Tumor_G1 |
| 1581 | COX6C    | 5.94727658  | Tumor_G1 |
| 1582 | COX7A2   | 6.409016348 | Tumor_G1 |
| 1583 | COX7B    | 5.563660808 | Tumor_G1 |
| 1584 | COX8A    | 8.804096538 | Tumor_G1 |
| 1585 | SCO1     | 2.613024051 | Tumor_G1 |
| 1586 | SURF1    | 5.996393213 | Tumor_G1 |
| 1587 | ATP6V1E1 | 6.557961493 | Tumor_G1 |
| 1588 | DLAT     | 4.322985792 | Tumor_G1 |
| 1589 | PDC      | 0.086405242 | Tumor_G1 |
| 1590 | SUCLG2   | 5.507536794 | Tumor_G1 |
| 1591 | SLC25A5  | 7.466308215 | Tumor_G1 |
| 1592 | UCP2     | 6.986185072 | Tumor_G1 |
| 1593 | SOD2     | 5.122736934 | Tumor_G1 |
| 1594 | NOX4     | 2.559287332 | Tumor_G1 |
| 1595 | DUOX1    | 4.423824024 | Tumor_G1 |
| 1596 | DUOXA1   | 5.546658282 | Tumor_G1 |
| 1597 | DUOX2    | 5.209887907 | Tumor_G1 |
| 1598 | DUOXA2   | 3.826426733 | Tumor_G1 |



|      |          |             |          |
|------|----------|-------------|----------|
| 1599 | NDUFA1   | 7.781132238 | Tumor_G1 |
| 1600 | NDUFA2   | 6.583100956 | Tumor_G1 |
| 1601 | NDUFA8   | 6.834509311 | Tumor_G1 |
| 1602 | NDUFB1   | 5.376955222 | Tumor_G1 |
| 1603 | NDUFB10  | 7.21992826  | Tumor_G1 |
| 1604 | NDUFB2   | 6.317691864 | Tumor_G1 |
| 1605 | NDUFB3   | 6.206930814 | Tumor_G1 |
| 1606 | NDUFB7   | 8.18334618  | Tumor_G1 |
| 1607 | CYC1     | 6.950413159 | Tumor_G1 |
| 1608 | ETFB     | 4.698460242 | Tumor_G1 |
| 1609 | UQCR10   | 7.483000678 | Tumor_G1 |
| 1610 | UQCRQ    | 6.891611376 | Tumor_G1 |
| 1611 | UQCC3    | 3.677454191 | Tumor_G1 |
| 1612 | COX15    | 5.073384962 | Tumor_G1 |
| 1613 | COX5A    | 6.862452184 | Tumor_G1 |
| 1614 | COX6B1   | 8.630598985 | Tumor_G1 |
| 1615 | COX6C    | 6.085911564 | Tumor_G1 |
| 1616 | COX7A2   | 6.616218254 | Tumor_G1 |
| 1617 | COX7B    | 5.940081849 | Tumor_G1 |
| 1618 | COX8A    | 8.94714708  | Tumor_G1 |
| 1619 | SCO1     | 3.509857174 | Tumor_G1 |
| 1620 | SURF1    | 6.050536204 | Tumor_G1 |
| 1621 | ATP6V1E1 | 7.178894024 | Tumor_G1 |
| 1622 | DLAT     | 5.206088007 | Tumor_G1 |
| 1623 | PDC      | 0.323612646 | Tumor_G1 |
| 1624 | SUCLG2   | 6.40696611  | Tumor_G1 |
| 1625 | SLC25A5  | 8.681005967 | Tumor_G1 |
| 1626 | UCP2     | 7.563525195 | Tumor_G1 |
| 1627 | SOD2     | 5.857322224 | Tumor_G1 |
| 1628 | NOX4     | 2.275810762 | Tumor_G1 |
| 1629 | DUOX1    | 6.474822578 | Tumor_G1 |
| 1630 | DUOXA1   | 6.245500896 | Tumor_G1 |
| 1631 | DUOX2    | 6.36123871  | Tumor_G1 |
| 1632 | DUOXA2   | 4.119783877 | Tumor_G1 |
| 1633 | NDUFA1   | 7.760964781 | Tumor_G1 |
| 1634 | NDUFA2   | 6.580738187 | Tumor_G1 |
| 1635 | NDUFA8   | 6.860394417 | Tumor_G1 |
| 1636 | NDUFB1   | 5.375864425 | Tumor_G1 |
| 1637 | NDUFB10  | 7.269023145 | Tumor_G1 |
| 1638 | NDUFB2   | 6.474381085 | Tumor_G1 |

|      |          |             |          |
|------|----------|-------------|----------|
| 1639 | NDUFB3   | 6.18210568  | Tumor_G1 |
| 1640 | NDUFB7   | 8.369531869 | Tumor_G1 |
| 1641 | CYC1     | 6.764059615 | Tumor_G1 |
| 1642 | ETFB     | 4.939393745 | Tumor_G1 |
| 1643 | UQCR10   | 7.426264792 | Tumor_G1 |
| 1644 | UQCRQ    | 6.901306935 | Tumor_G1 |
| 1645 | UQCC3    | 3.99466632  | Tumor_G1 |
| 1646 | COX15    | 4.93756396  | Tumor_G1 |
| 1647 | COX5A    | 6.722382993 | Tumor_G1 |
| 1648 | COX6B1   | 8.443098706 | Tumor_G1 |
| 1649 | COX6C    | 6.202525795 | Tumor_G1 |
| 1650 | COX7A2   | 6.754013884 | Tumor_G1 |
| 1651 | COX7B    | 5.765767228 | Tumor_G1 |
| 1652 | COX8A    | 9.32744005  | Tumor_G1 |
| 1653 | SCO1     | 3.185255308 | Tumor_G1 |
| 1654 | SURF1    | 5.801386218 | Tumor_G1 |
| 1655 | ATP6V1E1 | 7.123138615 | Tumor_G1 |
| 1656 | DLAT     | 5.04221201  | Tumor_G1 |
| 1657 | PDC      | 0.045721512 | Tumor_G1 |
| 1658 | SUCLG2   | 6.471229906 | Tumor_G1 |
| 1659 | SLC25A5  | 7.99111877  | Tumor_G1 |
| 1660 | UCP2     | 8.349462222 | Tumor_G1 |
| 1661 | SOD2     | 5.202254889 | Tumor_G1 |
| 1662 | NOX4     | 2.192725574 | Tumor_G1 |
| 1663 | DUOX1    | 6.012085967 | Tumor_G1 |
| 1664 | DUOXA1   | 6.254328742 | Tumor_G1 |
| 1665 | DUOX2    | 5.388904755 | Tumor_G1 |
| 1666 | DUOXA2   | 3.579657861 | Tumor_G1 |
| 1667 | NDUFA1   | 7.752348499 | Tumor_G1 |
| 1668 | NDUFA2   | 6.800233564 | Tumor_G1 |
| 1669 | NDUFA8   | 6.893309001 | Tumor_G1 |
| 1670 | NDUFB1   | 5.461035477 | Tumor_G1 |
| 1671 | NDUFB10  | 7.388363768 | Tumor_G1 |
| 1672 | NDUFB2   | 6.507950598 | Tumor_G1 |
| 1673 | NDUFB3   | 6.154541275 | Tumor_G1 |
| 1674 | NDUFB7   | 8.352514326 | Tumor_G1 |
| 1675 | CYC1     | 6.894708449 | Tumor_G1 |
| 1676 | ETFB     | 4.772925627 | Tumor_G1 |
| 1677 | UQCR10   | 7.568009224 | Tumor_G1 |
| 1678 | UQCRQ    | 7.308999775 | Tumor_G1 |

|      |          |             |          |
|------|----------|-------------|----------|
| 1679 | UQCC3    | 4.178893538 | Tumor_G1 |
| 1680 | COX15    | 4.610833322 | Tumor_G1 |
| 1681 | COX5A    | 7.091442527 | Tumor_G1 |
| 1682 | COX6B1   | 8.637219048 | Tumor_G1 |
| 1683 | COX6C    | 6.284774941 | Tumor_G1 |
| 1684 | COX7A2   | 7.012361428 | Tumor_G1 |
| 1685 | COX7B    | 5.950516431 | Tumor_G1 |
| 1686 | COX8A    | 9.451160361 | Tumor_G1 |
| 1687 | SCO1     | 2.671346669 | Tumor_G1 |
| 1688 | SURF1    | 6.261483049 | Tumor_G1 |
| 1689 | ATP6V1E1 | 7.167920868 | Tumor_G1 |
| 1690 | DLAT     | 5.051280556 | Tumor_G1 |
| 1691 | PDC      | 0.10727847  | Tumor_G1 |
| 1692 | SUCLG2   | 6.315474872 | Tumor_G1 |
| 1693 | SLC25A5  | 8.042268279 | Tumor_G1 |
| 1694 | UCP2     | 7.252063782 | Tumor_G1 |
| 1695 | SOD2     | 4.883927007 | Tumor_G1 |
| 1696 | NOX4     | 2.069078713 | Tumor_G1 |
| 1697 | DUOX1    | 5.872405795 | Tumor_G1 |
| 1698 | DUOXA1   | 5.889785248 | Tumor_G1 |
| 1699 | DUOX2    | 5.14896078  | Tumor_G1 |
| 1700 | DUOXA2   | 3.269119269 | Tumor_G1 |
| 1701 | NDUFA1   | 8.2049675   | Tumor_G1 |
| 1702 | NDUFA2   | 7.074353225 | Tumor_G1 |
| 1703 | NDUFA8   | 7.016580989 | Tumor_G1 |
| 1704 | NDUFB1   | 5.753402963 | Tumor_G1 |
| 1705 | NDUFB10  | 7.732165075 | Tumor_G1 |
| 1706 | NDUFB2   | 6.678766096 | Tumor_G1 |
| 1707 | NDUFB3   | 6.206081849 | Tumor_G1 |
| 1708 | NDUFB7   | 8.66431158  | Tumor_G1 |
| 1709 | CYC1     | 6.713251997 | Tumor_G1 |
| 1710 | ETFB     | 4.805153276 | Tumor_G1 |
| 1711 | UQCR10   | 7.84492985  | Tumor_G1 |
| 1712 | UQCRQ    | 7.504477097 | Tumor_G1 |
| 1713 | UQCC3    | 4.189308513 | Tumor_G1 |
| 1714 | COX15    | 3.948088528 | Tumor_G1 |
| 1715 | COX5A    | 7.609819711 | Tumor_G1 |
| 1716 | COX6B1   | 8.996541329 | Tumor_G1 |
| 1717 | COX6C    | 6.742848692 | Tumor_G1 |
| 1718 | COX7A2   | 7.227119507 | Tumor_G1 |

|      |          |             |          |
|------|----------|-------------|----------|
| 1719 | COX7B    | 6.293920222 | Tumor_G1 |
| 1720 | COX8A    | 9.292995895 | Tumor_G1 |
| 1721 | SCO1     | 2.374416355 | Tumor_G1 |
| 1722 | SURF1    | 5.813850818 | Tumor_G1 |
| 1723 | ATP6V1E1 | 7.212771527 | Tumor_G1 |
| 1724 | DLAT     | 4.509614628 | Tumor_G1 |
| 1725 | PDC      | 0.056299519 | Tumor_G1 |
| 1726 | SUCLG2   | 5.637640407 | Tumor_G1 |
| 1727 | SLC25A5  | 7.360531148 | Tumor_G1 |
| 1728 | UCP2     | 8.310562211 | Tumor_G1 |
| 1729 | SOD2     | 5.406686664 | Tumor_G1 |
| 1730 | NOX4     | 2.867497066 | Tumor_G1 |
| 1731 | DUOX1    | 5.373923569 | Tumor_G1 |
| 1732 | DUOXA1   | 5.661224195 | Tumor_G1 |
| 1733 | DUOX2    | 5.083386255 | Tumor_G1 |
| 1734 | DUOXA2   | 3.412708488 | Tumor_G1 |
| 1735 | NDUFA1   | 7.68785047  | Tumor_G1 |
| 1736 | NDUFA2   | 6.296106152 | Tumor_G1 |
| 1737 | NDUFA8   | 6.64246727  | Tumor_G1 |
| 1738 | NDUFB1   | 5.33887929  | Tumor_G1 |
| 1739 | NDUFB10  | 7.227927088 | Tumor_G1 |
| 1740 | NDUFB2   | 5.93601908  | Tumor_G1 |
| 1741 | NDUFB3   | 6.140027665 | Tumor_G1 |
| 1742 | NDUFB7   | 8.165018004 | Tumor_G1 |
| 1743 | CYC1     | 6.585172816 | Tumor_G1 |
| 1744 | ETFB     | 4.337747066 | Tumor_G1 |
| 1745 | UQCR10   | 7.041596969 | Tumor_G1 |
| 1746 | UQCRQ    | 6.773845871 | Tumor_G1 |
| 1747 | UQCC3    | 3.689599234 | Tumor_G1 |
| 1748 | COX15    | 4.767449115 | Tumor_G1 |
| 1749 | COX5A    | 7.006669799 | Tumor_G1 |
| 1750 | COX6B1   | 8.198362412 | Tumor_G1 |
| 1751 | COX6C    | 5.994827629 | Tumor_G1 |
| 1752 | COX7A2   | 6.640722467 | Tumor_G1 |
| 1753 | COX7B    | 5.653856773 | Tumor_G1 |
| 1754 | COX8A    | 8.999776746 | Tumor_G1 |
| 1755 | SCO1     | 3.315148435 | Tumor_G1 |
| 1756 | SURF1    | 5.990400211 | Tumor_G1 |
| 1757 | ATP6V1E1 | 6.959961719 | Tumor_G1 |
| 1758 | DLAT     | 5.167321566 | Tumor_G1 |

|      |          |             |          |
|------|----------|-------------|----------|
| 1759 | PDC      | 0           | Tumor_G1 |
| 1760 | SUCLG2   | 6.096159931 | Tumor_G1 |
| 1761 | SLC25A5  | 8.570640003 | Tumor_G1 |
| 1762 | UCP2     | 8.049383529 | Tumor_G1 |
| 1763 | SOD2     | 6.082830122 | Tumor_G1 |
| 1764 | NOX4     | 3.049873861 | Tumor_G1 |
| 1765 | DUOX1    | 5.534791924 | Tumor_G1 |
| 1766 | DUOXA1   | 5.612886151 | Tumor_G1 |
| 1767 | DUOX2    | 5.05295303  | Tumor_G1 |
| 1768 | DUOXA2   | 3.656266041 | Tumor_G1 |
| 1769 | NDUFA1   | 7.72433789  | Tumor_G1 |
| 1770 | NDUFA2   | 6.459036439 | Tumor_G1 |
| 1771 | NDUFA8   | 6.817260832 | Tumor_G1 |
| 1772 | NDUFB1   | 5.527121285 | Tumor_G1 |
| 1773 | NDUFB10  | 7.37704117  | Tumor_G1 |
| 1774 | NDUFB2   | 6.271254997 | Tumor_G1 |
| 1775 | NDUFB3   | 6.128719433 | Tumor_G1 |
| 1776 | NDUFB7   | 8.306212433 | Tumor_G1 |
| 1777 | CYC1     | 6.481706299 | Tumor_G1 |
| 1778 | ETFB     | 4.650216129 | Tumor_G1 |
| 1779 | UQCR10   | 7.288929602 | Tumor_G1 |
| 1780 | UQCRQ    | 6.908008414 | Tumor_G1 |
| 1781 | UQCC3    | 4.446370546 | Tumor_G1 |
| 1782 | COX15    | 4.776026749 | Tumor_G1 |
| 1783 | COX5A    | 6.981180186 | Tumor_G1 |
| 1784 | COX6B1   | 8.34951773  | Tumor_G1 |
| 1785 | COX6C    | 6.098673202 | Tumor_G1 |
| 1786 | COX7A2   | 6.629479691 | Tumor_G1 |
| 1787 | COX7B    | 5.736287091 | Tumor_G1 |
| 1788 | COX8A    | 9.084378567 | Tumor_G1 |
| 1789 | SCO1     | 3.484845752 | Tumor_G1 |
| 1790 | SURF1    | 6.500150511 | Tumor_G1 |
| 1791 | ATP6V1E1 | 6.989166113 | Tumor_G1 |
| 1792 | DLAT     | 5.025991554 | Tumor_G1 |
| 1793 | PDC      | 0.341837982 | Tumor_G1 |
| 1794 | SUCLG2   | 5.709460572 | Tumor_G1 |
| 1795 | SLC25A5  | 7.770242782 | Tumor_G1 |
| 1796 | UCP2     | 8.061141903 | Tumor_G1 |
| 1797 | SOD2     | 5.053072007 | Tumor_G1 |
| 1798 | NOX4     | 3.003251538 | Tumor_G1 |

|      |          |             |          |
|------|----------|-------------|----------|
| 1799 | DUOX1    | 6.12060679  | Tumor_G1 |
| 1800 | DUOXA1   | 6.384858223 | Tumor_G1 |
| 1801 | DUOX2    | 7.022387844 | Tumor_G1 |
| 1802 | DUOXA2   | 5.290121501 | Tumor_G1 |
| 1803 | NDUFA1   | 7.322037046 | Tumor_G1 |
| 1804 | NDUFA2   | 6.230930096 | Tumor_G1 |
| 1805 | NDUFA8   | 6.517031095 | Tumor_G1 |
| 1806 | NDUFB1   | 4.99840779  | Tumor_G1 |
| 1807 | NDUFB10  | 6.805902608 | Tumor_G1 |
| 1808 | NDUFB2   | 6.036582927 | Tumor_G1 |
| 1809 | NDUFB3   | 5.862612039 | Tumor_G1 |
| 1810 | NDUFB7   | 7.869961841 | Tumor_G1 |
| 1811 | CYC1     | 6.37265524  | Tumor_G1 |
| 1812 | ETFB     | 4.277398437 | Tumor_G1 |
| 1813 | UQCR10   | 6.965748556 | Tumor_G1 |
| 1814 | UQCRQ    | 6.73540567  | Tumor_G1 |
| 1815 | UQCC3    | 3.682207252 | Tumor_G1 |
| 1816 | COX15    | 4.262326022 | Tumor_G1 |
| 1817 | COX5A    | 6.502866422 | Tumor_G1 |
| 1818 | COX6B1   | 8.147766555 | Tumor_G1 |
| 1819 | COX6C    | 5.853299636 | Tumor_G1 |
| 1820 | COX7A2   | 6.450537043 | Tumor_G1 |
| 1821 | COX7B    | 5.567319848 | Tumor_G1 |
| 1822 | COX8A    | 8.755390283 | Tumor_G1 |
| 1823 | SCO1     | 2.937712961 | Tumor_G1 |
| 1824 | SURF1    | 5.564294378 | Tumor_G1 |
| 1825 | ATP6V1E1 | 7.072829137 | Tumor_G1 |
| 1826 | DLAT     | 4.716326093 | Tumor_G1 |
| 1827 | PDC      | 0.1483389   | Tumor_G1 |
| 1828 | SUCLG2   | 5.916139619 | Tumor_G1 |
| 1829 | SLC25A5  | 8.044992568 | Tumor_G1 |
| 1830 | UCP2     | 7.713438966 | Tumor_G1 |
| 1831 | SOD2     | 5.85491531  | Tumor_G1 |
| 1832 | NOX4     | 3.537895646 | Tumor_G1 |
| 1833 | DUOX1    | 4.711669594 | Tumor_G1 |
| 1834 | DUOXA1   | 5.016589657 | Tumor_G1 |
| 1835 | DUOX2    | 3.644422646 | Tumor_G1 |
| 1836 | DUOXA2   | 2.013452799 | Tumor_G1 |
| 1837 | NDUFA1   | 8.046050717 | Tumor_G1 |
| 1838 | NDUFA2   | 7.014180714 | Tumor_G1 |

|      |          |             |          |
|------|----------|-------------|----------|
| 1839 | NDUFA8   | 6.853381034 | Tumor_G1 |
| 1840 | NDUFB1   | 5.608305014 | Tumor_G1 |
| 1841 | NDUFB10  | 7.431573827 | Tumor_G1 |
| 1842 | NDUFB2   | 6.771109882 | Tumor_G1 |
| 1843 | NDUFB3   | 6.419651578 | Tumor_G1 |
| 1844 | NDUFB7   | 8.397820506 | Tumor_G1 |
| 1845 | CYC1     | 6.719396336 | Tumor_G1 |
| 1846 | ETFB     | 4.752530554 | Tumor_G1 |
| 1847 | UQCR10   | 7.716209339 | Tumor_G1 |
| 1848 | UQCRQ    | 7.293067807 | Tumor_G1 |
| 1849 | UQCC3    | 4.121915895 | Tumor_G1 |
| 1850 | COX15    | 4.557025403 | Tumor_G1 |
| 1851 | COX5A    | 7.197051938 | Tumor_G1 |
| 1852 | COX6B1   | 8.611846877 | Tumor_G1 |
| 1853 | COX6C    | 6.350215047 | Tumor_G1 |
| 1854 | COX7A2   | 6.853910554 | Tumor_G1 |
| 1855 | COX7B    | 5.91620385  | Tumor_G1 |
| 1856 | COX8A    | 9.442952514 | Tumor_G1 |
| 1857 | SCO1     | 3.132693531 | Tumor_G1 |
| 1858 | SURF1    | 6.256908882 | Tumor_G1 |
| 1859 | ATP6V1E1 | 7.322530403 | Tumor_G1 |
| 1860 | DLAT     | 4.856016697 | Tumor_G1 |
| 1861 | PDC      | 0           | Tumor_G1 |
| 1862 | SUCLG2   | 6.197424662 | Tumor_G1 |
| 1863 | SLC25A5  | 8.047324579 | Tumor_G1 |
| 1864 | UCP2     | 8.489070597 | Tumor_G1 |
| 1865 | SOD2     | 4.797005864 | Tumor_G1 |
| 1866 | NOX4     | 1.802353912 | Tumor_G1 |
| 1867 | DUOX1    | 5.768096498 | Tumor_G1 |
| 1868 | DUOXA1   | 5.877550687 | Tumor_G1 |
| 1869 | DUOX2    | 5.553670841 | Tumor_G1 |
| 1870 | DUOXA2   | 3.135710565 | Tumor_G1 |
| 1871 | NDUFA1   | 7.484615897 | Tumor_G1 |
| 1872 | NDUFA2   | 6.718327022 | Tumor_G1 |
| 1873 | NDUFA8   | 6.953050434 | Tumor_G1 |
| 1874 | NDUFB1   | 5.562043873 | Tumor_G1 |
| 1875 | NDUFB10  | 7.483399997 | Tumor_G1 |
| 1876 | NDUFB2   | 6.402439414 | Tumor_G1 |
| 1877 | NDUFB3   | 5.959550594 | Tumor_G1 |
| 1878 | NDUFB7   | 8.605471317 | Tumor_G1 |

|      |          |             |          |
|------|----------|-------------|----------|
| 1879 | CYC1     | 6.733131726 | Tumor_G1 |
| 1880 | ETFB     | 4.69903648  | Tumor_G1 |
| 1881 | UQCR10   | 7.308686796 | Tumor_G1 |
| 1882 | UQCRQ    | 7.173873862 | Tumor_G1 |
| 1883 | UQCC3    | 4.16052107  | Tumor_G1 |
| 1884 | COX15    | 4.257163913 | Tumor_G1 |
| 1885 | COX5A    | 7.007677851 | Tumor_G1 |
| 1886 | COX6B1   | 8.64166788  | Tumor_G1 |
| 1887 | COX6C    | 6.196246074 | Tumor_G1 |
| 1888 | COX7A2   | 6.607046415 | Tumor_G1 |
| 1889 | COX7B    | 5.872558803 | Tumor_G1 |
| 1890 | COX8A    | 9.164011983 | Tumor_G1 |
| 1891 | SCO1     | 3.003894034 | Tumor_G1 |
| 1892 | SURF1    | 6.027528622 | Tumor_G1 |
| 1893 | ATP6V1E1 | 6.649939228 | Tumor_G1 |
| 1894 | DLAT     | 4.611900239 | Tumor_G1 |
| 1895 | PDC      | 0.242750617 | Tumor_G1 |
| 1896 | SUCLG2   | 5.499194998 | Tumor_G1 |
| 1897 | SLC25A5  | 7.969122604 | Tumor_G1 |
| 1898 | UCP2     | 7.827029722 | Tumor_G1 |
| 1899 | SOD2     | 5.013287552 | Tumor_G1 |
| 1900 | NOX4     | 2.045958744 | Tumor_G1 |
| 1901 | DUOX1    | 5.86105741  | Tumor_G1 |
| 1902 | DUOXA1   | 6.067660941 | Tumor_G1 |
| 1903 | DUOX2    | 6.311668643 | Tumor_G1 |
| 1904 | DUOXA2   | 4.775876978 | Tumor_G1 |
| 1905 | NDUFA1   | 7.477571442 | Tumor_G1 |
| 1906 | NDUFA2   | 6.44743937  | Tumor_G1 |
| 1907 | NDUFA8   | 6.768772525 | Tumor_G1 |
| 1908 | NDUFB1   | 5.23496634  | Tumor_G1 |
| 1909 | NDUFB10  | 7.358027554 | Tumor_G1 |
| 1910 | NDUFB2   | 6.443081836 | Tumor_G1 |
| 1911 | NDUFB3   | 5.950051089 | Tumor_G1 |
| 1912 | NDUFB7   | 8.323851279 | Tumor_G1 |
| 1913 | CYC1     | 6.538692595 | Tumor_G1 |
| 1914 | ETFB     | 4.779233087 | Tumor_G1 |
| 1915 | UQCR10   | 7.237383628 | Tumor_G1 |
| 1916 | UQCRQ    | 7.030150598 | Tumor_G1 |
| 1917 | UQCC3    | 3.864947695 | Tumor_G1 |
| 1918 | COX15    | 4.755461103 | Tumor_G1 |



|      |          |             |          |
|------|----------|-------------|----------|
| 1919 | COX5A    | 7.055106664 | Tumor_G1 |
| 1920 | COX6B1   | 8.24703056  | Tumor_G1 |
| 1921 | COX6C    | 6.08237859  | Tumor_G1 |
| 1922 | COX7A2   | 6.561263087 | Tumor_G1 |
| 1923 | COX7B    | 5.555400647 | Tumor_G1 |
| 1924 | COX8A    | 9.177081882 | Tumor_G1 |
| 1925 | SCO1     | 3.235573767 | Tumor_G1 |
| 1926 | SURF1    | 6.011742353 | Tumor_G1 |
| 1927 | ATP6V1E1 | 7.082637232 | Tumor_G1 |
| 1928 | DLAT     | 5.37893239  | Tumor_G1 |
| 1929 | PDC      | 0.161133701 | Tumor_G1 |
| 1930 | SUCLG2   | 6.148303967 | Tumor_G1 |
| 1931 | SLC25A5  | 8.224790454 | Tumor_G1 |
| 1932 | UCP2     | 8.466779353 | Tumor_G1 |
| 1933 | SOD2     | 6.306198834 | Tumor_G1 |
| 1934 | NOX4     | 2.702918438 | Tumor_G1 |
| 1935 | DUOX1    | 5.664512967 | Tumor_G1 |
| 1936 | DUOXA1   | 5.987878001 | Tumor_G1 |
| 1937 | DUOX2    | 6.342272838 | Tumor_G1 |
| 1938 | DUOXA2   | 4.402914235 | Tumor_G1 |
| 1939 | NDUFA1   | 7.829907652 | Tumor_G1 |
| 1940 | NDUFA2   | 6.739483833 | Tumor_G1 |
| 1941 | NDUFA8   | 6.873112736 | Tumor_G1 |
| 1942 | NDUFB1   | 5.536499604 | Tumor_G1 |
| 1943 | NDUFB10  | 7.609272121 | Tumor_G1 |
| 1944 | NDUFB2   | 6.490023984 | Tumor_G1 |
| 1945 | NDUFB3   | 5.875532596 | Tumor_G1 |
| 1946 | NDUFB7   | 8.580806363 | Tumor_G1 |
| 1947 | CYC1     | 6.578098871 | Tumor_G1 |
| 1948 | ETFB     | 4.975889737 | Tumor_G1 |
| 1949 | UQCR10   | 7.362993751 | Tumor_G1 |
| 1950 | UQCRQ    | 7.193379624 | Tumor_G1 |
| 1951 | UQCC3    | 4.474006758 | Tumor_G1 |
| 1952 | COX15    | 4.48137708  | Tumor_G1 |
| 1953 | COX5A    | 6.912301922 | Tumor_G1 |
| 1954 | COX6B1   | 8.503753323 | Tumor_G1 |
| 1955 | COX6C    | 6.393642973 | Tumor_G1 |
| 1956 | COX7A2   | 6.599501091 | Tumor_G1 |
| 1957 | COX7B    | 5.74349271  | Tumor_G1 |
| 1958 | COX8A    | 9.209501489 | Tumor_G1 |

|      |          |             |          |
|------|----------|-------------|----------|
| 1959 | SCO1     | 2.745663022 | Tumor_G1 |
| 1960 | SURF1    | 6.338617805 | Tumor_G1 |
| 1961 | ATP6V1E1 | 6.714404781 | Tumor_G1 |
| 1962 | DLAT     | 4.517646309 | Tumor_G1 |
| 1963 | PDC      | 0           | Tumor_G1 |
| 1964 | SUCLG2   | 5.971594521 | Tumor_G1 |
| 1965 | SLC25A5  | 7.717586377 | Tumor_G1 |
| 1966 | UCP2     | 8.005732693 | Tumor_G1 |
| 1967 | SOD2     | 4.080070111 | Tumor_G1 |
| 1968 | NOX4     | 2.098045551 | Tumor_G1 |
| 1969 | DUOX1    | 5.769734346 | Tumor_G1 |
| 1970 | DUOXA1   | 6.044340272 | Tumor_G1 |
| 1971 | DUOX2    | 6.084122611 | Tumor_G1 |
| 1972 | DUOXA2   | 5.117683767 | Tumor_G1 |
| 1973 | NDUFA1   | 7.282427783 | Tumor_G1 |
| 1974 | NDUFA2   | 5.948111866 | Tumor_G1 |
| 1975 | NDUFA8   | 6.473988754 | Tumor_G1 |
| 1976 | NDUFB1   | 4.937517291 | Tumor_G1 |
| 1977 | NDUFB10  | 6.879919255 | Tumor_G1 |
| 1978 | NDUFB2   | 6.041013386 | Tumor_G1 |
| 1979 | NDUFB3   | 5.807539614 | Tumor_G1 |
| 1980 | NDUFB7   | 7.940075661 | Tumor_G1 |
| 1981 | CYC1     | 6.492355869 | Tumor_G1 |
| 1982 | ETFB     | 4.428448544 | Tumor_G1 |
| 1983 | UQCR10   | 7.078977851 | Tumor_G1 |
| 1984 | UQCRQ    | 6.533746176 | Tumor_G1 |
| 1985 | UQCC3    | 3.641677289 | Tumor_G1 |
| 1986 | COX15    | 5.017053658 | Tumor_G1 |
| 1987 | COX5A    | 6.45766522  | Tumor_G1 |
| 1988 | COX6B1   | 7.940221786 | Tumor_G1 |
| 1989 | COX6C    | 5.745902375 | Tumor_G1 |
| 1990 | COX7A2   | 6.286193413 | Tumor_G1 |
| 1991 | COX7B    | 5.481753218 | Tumor_G1 |
| 1992 | COX8A    | 8.815918915 | Tumor_G1 |
| 1993 | SCO1     | 3.175471041 | Tumor_G1 |
| 1994 | SURF1    | 5.733369423 | Tumor_G1 |
| 1995 | ATP6V1E1 | 7.013249468 | Tumor_G1 |
| 1996 | DLAT     | 5.182670294 | Tumor_G1 |
| 1997 | PDC      | 0.060389533 | Tumor_G1 |
| 1998 | SUCLG2   | 6.335963332 | Tumor_G1 |

|      |          |             |          |
|------|----------|-------------|----------|
| 1999 | SLC25A5  | 7.687502468 | Tumor_G1 |
| 2000 | UCP2     | 8.711898841 | Tumor_G1 |
| 2001 | SOD2     | 5.733044392 | Tumor_G1 |
| 2002 | NOX4     | 2.099745116 | Tumor_G1 |
| 2003 | DUOX1    | 6.647721707 | Tumor_G1 |
| 2004 | DUOXA1   | 6.325342135 | Tumor_G1 |
| 2005 | DUOX2    | 6.95735664  | Tumor_G1 |
| 2006 | DUOXA2   | 4.419156601 | Tumor_G1 |
| 2007 | NDUFA1   | 7.87377226  | Tumor_G1 |
| 2008 | NDUFA2   | 6.646209482 | Tumor_G1 |
| 2009 | NDUFA8   | 6.314837109 | Tumor_G1 |
| 2010 | NDUFB1   | 5.575783192 | Tumor_G1 |
| 2011 | NDUFB10  | 7.186150979 | Tumor_G1 |
| 2012 | NDUFB2   | 6.26990898  | Tumor_G1 |
| 2013 | NDUFB3   | 6.357609663 | Tumor_G1 |
| 2014 | NDUFB7   | 8.138671033 | Tumor_G1 |
| 2015 | CYC1     | 6.727596245 | Tumor_G1 |
| 2016 | ETFB     | 4.279050718 | Tumor_G1 |
| 2017 | UQCR10   | 7.336699081 | Tumor_G1 |
| 2018 | UQCRQ    | 7.018969477 | Tumor_G1 |
| 2019 | UQCC3    | 3.841281546 | Tumor_G1 |
| 2020 | COX15    | 4.865823088 | Tumor_G1 |
| 2021 | COX5A    | 7.06808841  | Tumor_G1 |
| 2022 | COX6B1   | 8.652623107 | Tumor_G1 |
| 2023 | COX6C    | 6.25510402  | Tumor_G1 |
| 2024 | COX7A2   | 6.846560992 | Tumor_G1 |
| 2025 | COX7B    | 6.101843018 | Tumor_G1 |
| 2026 | COX8A    | 9.023245665 | Tumor_G1 |
| 2027 | SCO1     | 3.428100547 | Tumor_G1 |
| 2028 | SURF1    | 5.664746481 | Tumor_G1 |
| 2029 | ATP6V1E1 | 7.272999921 | Tumor_G1 |
| 2030 | DLAT     | 5.354548286 | Tumor_G1 |
| 2031 | PDC      | 0.108231192 | Tumor_G1 |
| 2032 | SUCLG2   | 6.506220646 | Tumor_G1 |
| 2033 | SLC25A5  | 8.80879014  | Tumor_G1 |
| 2034 | UCP2     | 8.249485    | Tumor_G1 |
| 2035 | SOD2     | 6.253015049 | Tumor_G1 |
| 2036 | NOX4     | 1.646378609 | Tumor_G1 |
| 2037 | DUOX1    | 5.127816438 | Tumor_G1 |
| 2038 | DUOXA1   | 4.824438316 | Tumor_G1 |

|      |          |             |          |
|------|----------|-------------|----------|
| 2039 | DUOX2    | 4.050220858 | Tumor_G1 |
| 2040 | DUOXA2   | 1.955875353 | Tumor_G1 |
| 2041 | NDUFA1   | 7.718047912 | Tumor_G1 |
| 2042 | NDUFA2   | 6.395194137 | Tumor_G1 |
| 2043 | NDUFA8   | 6.685151818 | Tumor_G1 |
| 2044 | NDUFB1   | 5.13690861  | Tumor_G1 |
| 2045 | NDUFB10  | 7.271828315 | Tumor_G1 |
| 2046 | NDUFB2   | 6.022271347 | Tumor_G1 |
| 2047 | NDUFB3   | 6.032389262 | Tumor_G1 |
| 2048 | NDUFB7   | 8.451660407 | Tumor_G1 |
| 2049 | CYC1     | 6.376653737 | Tumor_G1 |
| 2050 | ETFB     | 4.758206833 | Tumor_G1 |
| 2051 | UQCR10   | 7.34703434  | Tumor_G1 |
| 2052 | UQCRQ    | 6.926512574 | Tumor_G1 |
| 2053 | UQCC3    | 3.752659135 | Tumor_G1 |
| 2054 | COX15    | 4.384953898 | Tumor_G1 |
| 2055 | COX5A    | 6.774927266 | Tumor_G1 |
| 2056 | COX6B1   | 8.512279316 | Tumor_G1 |
| 2057 | COX6C    | 5.919639892 | Tumor_G1 |
| 2058 | COX7A2   | 6.440279611 | Tumor_G1 |
| 2059 | COX7B    | 5.743874371 | Tumor_G1 |
| 2060 | COX8A    | 9.168353233 | Tumor_G1 |
| 2061 | SCO1     | 2.824280584 | Tumor_G1 |
| 2062 | SURF1    | 6.248683585 | Tumor_G1 |
| 2063 | ATP6V1E1 | 7.121645966 | Tumor_G1 |
| 2064 | DLAT     | 4.615826366 | Tumor_G1 |
| 2065 | PDC      | 0.161239648 | Tumor_G1 |
| 2066 | SUCLG2   | 5.708797267 | Tumor_G1 |
| 2067 | SLC25A5  | 7.954689181 | Tumor_G1 |
| 2068 | UCP2     | 8.25325933  | Tumor_G1 |
| 2069 | SOD2     | 5.502130401 | Tumor_G1 |
| 2070 | NOX4     | 3.093807801 | Tumor_G1 |
| 2071 | DUOX1    | 5.179913784 | Tumor_G1 |
| 2072 | DUOXA1   | 5.694581456 | Tumor_G1 |
| 2073 | DUOX2    | 4.88805187  | Tumor_G1 |
| 2074 | DUOXA2   | 3.133249365 | Tumor_G1 |
| 2075 | NDUFA1   | 7.970926389 | Tumor_G1 |
| 2076 | NDUFA2   | 6.956234833 | Tumor_G1 |
| 2077 | NDUFA8   | 7.128139369 | Tumor_G1 |
| 2078 | NDUFB1   | 6.012677446 | Tumor_G1 |

|      |          |             |          |
|------|----------|-------------|----------|
| 2079 | NDUFB10  | 7.502206295 | Tumor_G1 |
| 2080 | NDUFB2   | 6.574758539 | Tumor_G1 |
| 2081 | NDUFB3   | 6.464791141 | Tumor_G1 |
| 2082 | NDUFB7   | 8.702185675 | Tumor_G1 |
| 2083 | CYC1     | 6.374867242 | Tumor_G1 |
| 2084 | ETFB     | 4.92109116  | Tumor_G1 |
| 2085 | UQCR10   | 7.834586936 | Tumor_G1 |
| 2086 | UQCRQ    | 7.258120344 | Tumor_G1 |
| 2087 | UQCC3    | 4.054185969 | Tumor_G1 |
| 2088 | COX15    | 4.405210298 | Tumor_G1 |
| 2089 | COX5A    | 6.914772327 | Tumor_G1 |
| 2090 | COX6B1   | 8.975997456 | Tumor_G1 |
| 2091 | COX6C    | 6.637510417 | Tumor_G1 |
| 2092 | COX7A2   | 6.562151329 | Tumor_G1 |
| 2093 | COX7B    | 6.314601984 | Tumor_G1 |
| 2094 | COX8A    | 9.195001044 | Tumor_G1 |
| 2095 | SCO1     | 3.04331729  | Tumor_G1 |
| 2096 | SURF1    | 6.473741027 | Tumor_G1 |
| 2097 | ATP6V1E1 | 7.061612489 | Tumor_G1 |
| 2098 | DLAT     | 4.435877585 | Tumor_G1 |
| 2099 | PDC      | 0.048141387 | Tumor_G1 |
| 2100 | SUCLG2   | 5.567429472 | Tumor_G1 |
| 2101 | SLC25A5  | 7.456329392 | Tumor_G1 |
| 2102 | UCP2     | 8.175665229 | Tumor_G1 |
| 2103 | SOD2     | 5.910676871 | Tumor_G1 |
| 2104 | NOX4     | 2.511721616 | Tumor_G1 |
| 2105 | DUOX1    | 5.110774569 | Tumor_G1 |
| 2106 | DUOXA1   | 5.674890035 | Tumor_G1 |
| 2107 | DUOX2    | 4.388879366 | Tumor_G1 |
| 2108 | DUOXA2   | 3.6954052   | Tumor_G1 |
| 2109 | NDUFA1   | 7.984762014 | Tumor_G1 |
| 2110 | NDUFA2   | 6.607668619 | Tumor_G1 |
| 2111 | NDUFA8   | 6.654044271 | Tumor_G1 |
| 2112 | NDUFB1   | 5.620367801 | Tumor_G1 |
| 2113 | NDUFB10  | 7.291192724 | Tumor_G1 |
| 2114 | NDUFB2   | 6.279372075 | Tumor_G1 |
| 2115 | NDUFB3   | 6.295748042 | Tumor_G1 |
| 2116 | NDUFB7   | 8.203732639 | Tumor_G1 |
| 2117 | CYC1     | 6.549292844 | Tumor_G1 |
| 2118 | ETFB     | 4.52943662  | Tumor_G1 |

|      |          |             |          |
|------|----------|-------------|----------|
| 2119 | UQCR10   | 7.334203699 | Tumor_G1 |
| 2120 | UQCRQ    | 7.27526183  | Tumor_G1 |
| 2121 | UQCC3    | 3.999712256 | Tumor_G1 |
| 2122 | COX15    | 4.425903653 | Tumor_G1 |
| 2123 | COX5A    | 7.303773189 | Tumor_G1 |
| 2124 | COX6B1   | 8.6462533   | Tumor_G1 |
| 2125 | COX6C    | 6.166183897 | Tumor_G1 |
| 2126 | COX7A2   | 6.963473075 | Tumor_G1 |
| 2127 | COX7B    | 6.133261551 | Tumor_G1 |
| 2128 | COX8A    | 9.331434594 | Tumor_G1 |
| 2129 | SCO1     | 2.87850711  | Tumor_G1 |
| 2130 | SURF1    | 5.914811056 | Tumor_G1 |
| 2131 | ATP6V1E1 | 6.753362777 | Tumor_G1 |
| 2132 | DLAT     | 4.83284798  | Tumor_G1 |
| 2133 | PDC      | 0.170070058 | Tumor_G1 |
| 2134 | SUCLG2   | 5.781802798 | Tumor_G1 |
| 2135 | SLC25A5  | 8.359566857 | Tumor_G1 |
| 2136 | UCP2     | 8.104739917 | Tumor_G1 |
| 2137 | SOD2     | 6.593392489 | Tumor_G1 |
| 2138 | NOX4     | 2.658340834 | Tumor_G1 |
| 2139 | DUOX1    | 5.231880243 | Tumor_G1 |
| 2140 | DUOXA1   | 5.543873225 | Tumor_G1 |
| 2141 | DUOX2    | 4.27827833  | Tumor_G1 |
| 2142 | DUOXA2   | 2.488882038 | Tumor_G1 |
| 2143 | NDUFA1   | 8.005221234 | Tumor_G1 |
| 2144 | NDUFA2   | 6.56793902  | Tumor_G1 |
| 2145 | NDUFA8   | 7.062795018 | Tumor_G1 |
| 2146 | NDUFB1   | 5.621776971 | Tumor_G1 |
| 2147 | NDUFB10  | 7.529008723 | Tumor_G1 |
| 2148 | NDUFB2   | 6.137166922 | Tumor_G1 |
| 2149 | NDUFB3   | 6.220914439 | Tumor_G1 |
| 2150 | NDUFB7   | 8.438677162 | Tumor_G1 |
| 2151 | CYC1     | 6.800878879 | Tumor_G1 |
| 2152 | ETFB     | 4.706643599 | Tumor_G1 |
| 2153 | UQCR10   | 7.339113871 | Tumor_G1 |
| 2154 | UQCRQ    | 7.002780565 | Tumor_G1 |
| 2155 | UQCC3    | 4.337484897 | Tumor_G1 |
| 2156 | COX15    | 4.880693446 | Tumor_G1 |
| 2157 | COX5A    | 7.251620355 | Tumor_G1 |
| 2158 | COX6B1   | 8.555993512 | Tumor_G1 |

|      |          |             |          |
|------|----------|-------------|----------|
| 2159 | COX6C    | 6.364570594 | Tumor_G1 |
| 2160 | COX7A2   | 6.773293414 | Tumor_G1 |
| 2161 | COX7B    | 5.862117123 | Tumor_G1 |
| 2162 | COX8A    | 9.258364953 | Tumor_G1 |
| 2163 | SCO1     | 3.362523432 | Tumor_G1 |
| 2164 | SURF1    | 5.973760046 | Tumor_G1 |
| 2165 | ATP6V1E1 | 6.983798377 | Tumor_G1 |
| 2166 | DLAT     | 5.014717243 | Tumor_G1 |
| 2167 | PDC      | 0.054316447 | Tumor_G1 |
| 2168 | SUCLG2   | 5.981778533 | Tumor_G1 |
| 2169 | SLC25A5  | 8.179020173 | Tumor_G1 |
| 2170 | UCP2     | 7.38417953  | Tumor_G1 |
| 2171 | SOD2     | 5.696455008 | Tumor_G1 |
| 2172 | NOX4     | 3.281306164 | Tumor_G1 |
| 2173 | DUOX1    | 5.453804955 | Tumor_G1 |
| 2174 | DUOXA1   | 5.950897188 | Tumor_G1 |
| 2175 | DUOX2    | 5.579955826 | Tumor_G1 |
| 2176 | DUOXA2   | 3.960064784 | Tumor_G1 |
| 2177 | NDUFA1   | 7.72277844  | Tumor_G1 |
| 2178 | NDUFA2   | 6.312085224 | Tumor_G1 |
| 2179 | NDUFA8   | 6.886009491 | Tumor_G1 |
| 2180 | NDUFB1   | 5.336201621 | Tumor_G1 |
| 2181 | NDUFB10  | 7.152640032 | Tumor_G1 |
| 2182 | NDUFB2   | 6.114825851 | Tumor_G1 |
| 2183 | NDUFB3   | 6.184779444 | Tumor_G1 |
| 2184 | NDUFB7   | 8.261665021 | Tumor_G1 |
| 2185 | CYC1     | 6.606818299 | Tumor_G1 |
| 2186 | ETFB     | 4.643931867 | Tumor_G1 |
| 2187 | UQCR10   | 7.24483967  | Tumor_G1 |
| 2188 | UQCRQ    | 6.782728589 | Tumor_G1 |
| 2189 | UQCC3    | 3.952606265 | Tumor_G1 |
| 2190 | COX15    | 4.877174813 | Tumor_G1 |
| 2191 | COX5A    | 6.757229618 | Tumor_G1 |
| 2192 | COX6B1   | 8.344431676 | Tumor_G1 |
| 2193 | COX6C    | 6.050824634 | Tumor_G1 |
| 2194 | COX7A2   | 6.595328014 | Tumor_G1 |
| 2195 | COX7B    | 5.850962932 | Tumor_G1 |
| 2196 | COX8A    | 8.960639478 | Tumor_G1 |
| 2197 | SCO1     | 3.497780317 | Tumor_G1 |
| 2198 | SURF1    | 5.802151298 | Tumor_G1 |

|      |          |             |          |
|------|----------|-------------|----------|
| 2199 | ATP6V1E1 | 7.056858404 | Tumor_G1 |
| 2200 | DLAT     | 5.221672886 | Tumor_G1 |
| 2201 | PDC      | 0.103137179 | Tumor_G1 |
| 2202 | SUCLG2   | 6.057592617 | Tumor_G1 |
| 2203 | SLC25A5  | 8.087253844 | Tumor_G1 |
| 2204 | UCP2     | 7.070151961 | Tumor_G1 |
| 2205 | SOD2     | 5.372277156 | Tumor_G1 |
| 2206 | NOX4     | 3.43175991  | Tumor_G1 |
| 2207 | DUOX1    | 6.686845426 | Tumor_G1 |
| 2208 | DUOXA1   | 6.754204679 | Tumor_G1 |
| 2209 | DUOX2    | 6.552697449 | Tumor_G1 |
| 2210 | DUOXA2   | 4.603559338 | Tumor_G1 |
| 2211 | NDUFA1   | 7.899765757 | Tumor_G1 |
| 2212 | NDUFA2   | 6.713562689 | Tumor_G1 |
| 2213 | NDUFA8   | 6.690264112 | Tumor_G1 |
| 2214 | NDUFB1   | 5.332555896 | Tumor_G1 |
| 2215 | NDUFB10  | 7.168903984 | Tumor_G1 |
| 2216 | NDUFB2   | 6.409254201 | Tumor_G1 |
| 2217 | NDUFB3   | 6.105692589 | Tumor_G1 |
| 2218 | NDUFB7   | 8.165778129 | Tumor_G1 |
| 2219 | CYC1     | 6.739859    | Tumor_G1 |
| 2220 | ETFB     | 4.717422758 | Tumor_G1 |
| 2221 | UQCR10   | 7.353914555 | Tumor_G1 |
| 2222 | UQCRQ    | 6.768018473 | Tumor_G1 |
| 2223 | UQCC3    | 4.024587765 | Tumor_G1 |
| 2224 | COX15    | 4.734080977 | Tumor_G1 |
| 2225 | COX5A    | 6.787830705 | Tumor_G1 |
| 2226 | COX6B1   | 8.351498564 | Tumor_G1 |
| 2227 | COX6C    | 6.165095341 | Tumor_G1 |
| 2228 | COX7A2   | 6.614260062 | Tumor_G1 |
| 2229 | COX7B    | 5.741288225 | Tumor_G1 |
| 2230 | COX8A    | 9.278711668 | Tumor_G1 |
| 2231 | SCO1     | 3.078064228 | Tumor_G1 |
| 2232 | SURF1    | 5.660821768 | Tumor_G1 |
| 2233 | ATP6V1E1 | 7.170727603 | Tumor_G1 |
| 2234 | DLAT     | 4.879187122 | Tumor_G1 |
| 2235 | PDC      | 0.345793962 | Tumor_G1 |
| 2236 | SUCLG2   | 6.475208525 | Tumor_G1 |
| 2237 | SLC25A5  | 8.058893792 | Tumor_G1 |
| 2238 | UCP2     | 8.212003908 | Tumor_G1 |



|      |          |             |          |
|------|----------|-------------|----------|
| 2239 | SOD2     | 5.147486752 | Tumor_G1 |
| 2240 | NOX4     | 1.335149851 | Tumor_G1 |
| 2241 | DUOX1    | 6.093780676 | Tumor_G1 |
| 2242 | DUOXA1   | 6.195352884 | Tumor_G1 |
| 2243 | DUOX2    | 5.292891724 | Tumor_G1 |
| 2244 | DUOXA2   | 3.31205661  | Tumor_G1 |
| 2245 | NDUFA1   | 7.800414967 | Tumor_G1 |
| 2246 | NDUFA2   | 6.501832545 | Tumor_G1 |
| 2247 | NDUFA8   | 6.6837757   | Tumor_G1 |
| 2248 | NDUFB1   | 5.364553217 | Tumor_G1 |
| 2249 | NDUFB10  | 7.222037779 | Tumor_G1 |
| 2250 | NDUFB2   | 6.253962711 | Tumor_G1 |
| 2251 | NDUFB3   | 6.110710187 | Tumor_G1 |
| 2252 | NDUFB7   | 8.06192073  | Tumor_G1 |
| 2253 | CYC1     | 6.375736093 | Tumor_G1 |
| 2254 | ETFB     | 4.233195918 | Tumor_G1 |
| 2255 | UQCR10   | 7.174873489 | Tumor_G1 |
| 2256 | UQCRQ    | 7.045813957 | Tumor_G1 |
| 2257 | UQCC3    | 3.912614818 | Tumor_G1 |
| 2258 | COX15    | 4.070673555 | Tumor_G1 |
| 2259 | COX5A    | 7.155323063 | Tumor_G1 |
| 2260 | COX6B1   | 8.363308475 | Tumor_G1 |
| 2261 | COX6C    | 5.798582824 | Tumor_G1 |
| 2262 | COX7A2   | 6.658469083 | Tumor_G1 |
| 2263 | COX7B    | 5.762726144 | Tumor_G1 |
| 2264 | COX8A    | 8.961331985 | Tumor_G1 |
| 2265 | SCO1     | 2.818770071 | Tumor_G1 |
| 2266 | SURF1    | 5.994196907 | Tumor_G1 |
| 2267 | ATP6V1E1 | 6.836082334 | Tumor_G1 |
| 2268 | DLAT     | 4.751253459 | Tumor_G1 |
| 2269 | PDC      | 0.122140213 | Tumor_G1 |
| 2270 | SUCLG2   | 5.505334012 | Tumor_G1 |
| 2271 | SLC25A5  | 7.72643073  | Tumor_G1 |
| 2272 | UCP2     | 7.886365883 | Tumor_G1 |
| 2273 | SOD2     | 5.958076578 | Tumor_G1 |
| 2274 | NOX4     | 2.10833615  | Tumor_G1 |
| 2275 | DUOX1    | 4.842883134 | Tumor_G1 |
| 2276 | DUOXA1   | 5.717821861 | Tumor_G1 |
| 2277 | DUOX2    | 5.011347193 | Tumor_G1 |
| 2278 | DUOXA2   | 3.563544171 | Tumor_G1 |

|      |          |             |          |
|------|----------|-------------|----------|
| 2279 | NDUFA1   | 7.710314542 | Tumor_G1 |
| 2280 | NDUFA2   | 6.39737676  | Tumor_G1 |
| 2281 | NDUFA8   | 6.857403902 | Tumor_G1 |
| 2282 | NDUFB1   | 5.366057851 | Tumor_G1 |
| 2283 | NDUFB10  | 7.314286543 | Tumor_G1 |
| 2284 | NDUFB2   | 6.169944236 | Tumor_G1 |
| 2285 | NDUFB3   | 6.103187765 | Tumor_G1 |
| 2286 | NDUFB7   | 8.446408243 | Tumor_G1 |
| 2287 | CYC1     | 6.685915131 | Tumor_G1 |
| 2288 | ETFB     | 4.612433071 | Tumor_G1 |
| 2289 | UQCR10   | 7.278144017 | Tumor_G1 |
| 2290 | UQCRQ    | 6.927023072 | Tumor_G1 |
| 2291 | UQCC3    | 4.061329872 | Tumor_G1 |
| 2292 | COX15    | 4.691463706 | Tumor_G1 |
| 2293 | COX5A    | 6.788545798 | Tumor_G1 |
| 2294 | COX6B1   | 8.287497301 | Tumor_G1 |
| 2295 | COX6C    | 6.296082795 | Tumor_G1 |
| 2296 | COX7A2   | 6.584644761 | Tumor_G1 |
| 2297 | COX7B    | 5.655923299 | Tumor_G1 |
| 2298 | COX8A    | 9.138113343 | Tumor_G1 |
| 2299 | SCO1     | 3.084630212 | Tumor_G1 |
| 2300 | SURF1    | 5.891034817 | Tumor_G1 |
| 2301 | ATP6V1E1 | 7.009235586 | Tumor_G1 |
| 2302 | DLAT     | 4.783309946 | Tumor_G1 |
| 2303 | PDC      | 0.387085181 | Tumor_G1 |
| 2304 | SUCLG2   | 5.730596804 | Tumor_G1 |
| 2305 | SLC25A5  | 7.944223912 | Tumor_G1 |
| 2306 | UCP2     | 7.793007779 | Tumor_G1 |
| 2307 | SOD2     | 5.600655815 | Tumor_G1 |
| 2308 | NOX4     | 2.89322402  | Tumor_G1 |
| 2309 | DUOX1    | 6.480570113 | Tumor_G1 |
| 2310 | DUOXA1   | 6.681415771 | Tumor_G1 |
| 2311 | DUOX2    | 6.154594301 | Tumor_G1 |
| 2312 | DUOXA2   | 4.454246846 | Tumor_G1 |
| 2313 | NDUFA1   | 7.705238818 | Tumor_G1 |
| 2314 | NDUFA2   | 6.596188947 | Tumor_G1 |
| 2315 | NDUFA8   | 6.673020461 | Tumor_G1 |
| 2316 | NDUFB1   | 5.227931841 | Tumor_G1 |
| 2317 | NDUFB10  | 7.12901027  | Tumor_G1 |
| 2318 | NDUFB2   | 6.365294393 | Tumor_G1 |

|      |          |             |          |
|------|----------|-------------|----------|
| 2319 | NDUFB3   | 5.783684407 | Tumor_G1 |
| 2320 | NDUFB7   | 8.074512292 | Tumor_G1 |
| 2321 | CYC1     | 6.541359582 | Tumor_G1 |
| 2322 | ETFB     | 4.155020396 | Tumor_G1 |
| 2323 | UQCR10   | 7.339148267 | Tumor_G1 |
| 2324 | UQCRQ    | 6.873996481 | Tumor_G1 |
| 2325 | UQCC3    | 3.998168021 | Tumor_G1 |
| 2326 | COX15    | 4.254713212 | Tumor_G1 |
| 2327 | COX5A    | 6.865924983 | Tumor_G1 |
| 2328 | COX6B1   | 8.39360667  | Tumor_G1 |
| 2329 | COX6C    | 6.240142664 | Tumor_G1 |
| 2330 | COX7A2   | 6.673716714 | Tumor_G1 |
| 2331 | COX7B    | 5.639891919 | Tumor_G1 |
| 2332 | COX8A    | 9.179901504 | Tumor_G1 |
| 2333 | SCO1     | 2.708961196 | Tumor_G1 |
| 2334 | SURF1    | 5.608540234 | Tumor_G1 |
| 2335 | ATP6V1E1 | 6.955867069 | Tumor_G1 |
| 2336 | DLAT     | 4.416198589 | Tumor_G1 |
| 2337 | PDC      | 0.093425188 | Tumor_G1 |
| 2338 | SUCLG2   | 5.800466601 | Tumor_G1 |
| 2339 | SLC25A5  | 8.0604853   | Tumor_G1 |
| 2340 | UCP2     | 7.587062457 | Tumor_G1 |
| 2341 | SOD2     | 4.324388131 | Tumor_G1 |
| 2342 | NOX4     | 1.663334958 | Tumor_G1 |
| 2343 | DUOX1    | 5.375088094 | Tumor_G1 |
| 2344 | DUOXA1   | 5.515811856 | Tumor_G1 |
| 2345 | DUOX2    | 4.8446262   | Tumor_G1 |
| 2346 | DUOXA2   | 3.049261661 | Tumor_G1 |
| 2347 | NDUFA1   | 7.017966116 | Tumor_G1 |
| 2348 | NDUFA2   | 6.163412347 | Tumor_G1 |
| 2349 | NDUFA8   | 6.384255547 | Tumor_G1 |
| 2350 | NDUFB1   | 4.510136725 | Tumor_G1 |
| 2351 | NDUFB10  | 6.848247031 | Tumor_G1 |
| 2352 | NDUFB2   | 5.841785807 | Tumor_G1 |
| 2353 | NDUFB3   | 5.434081688 | Tumor_G1 |
| 2354 | NDUFB7   | 7.897718932 | Tumor_G1 |
| 2355 | CYC1     | 6.603850512 | Tumor_G1 |
| 2356 | ETFB     | 4.586747236 | Tumor_G1 |
| 2357 | UQCR10   | 6.8609067   | Tumor_G1 |
| 2358 | UQCRQ    | 6.509199253 | Tumor_G1 |

|      |          |             |          |
|------|----------|-------------|----------|
| 2359 | UQCC3    | 3.735088622 | Tumor_G1 |
| 2360 | COX15    | 4.708318672 | Tumor_G1 |
| 2361 | COX5A    | 6.386416677 | Tumor_G1 |
| 2362 | COX6B1   | 8.231199984 | Tumor_G1 |
| 2363 | COX6C    | 5.789894864 | Tumor_G1 |
| 2364 | COX7A2   | 6.135958358 | Tumor_G1 |
| 2365 | COX7B    | 5.415084946 | Tumor_G1 |
| 2366 | COX8A    | 8.900391113 | Tumor_G1 |
| 2367 | SCO1     | 2.767059341 | Tumor_G1 |
| 2368 | SURF1    | 5.778706969 | Tumor_G1 |
| 2369 | ATP6V1E1 | 6.769302398 | Tumor_G1 |
| 2370 | DLAT     | 4.828310829 | Tumor_G1 |
| 2371 | PDC      | 0.05141007  | Tumor_G1 |
| 2372 | SUCLG2   | 6.15265629  | Tumor_G1 |
| 2373 | SLC25A5  | 8.19301228  | Tumor_G1 |
| 2374 | UCP2     | 8.276096123 | Tumor_G1 |
| 2375 | SOD2     | 4.87538643  | Tumor_G1 |
| 2376 | NOX4     | 2.543208936 | Tumor_G1 |
| 2377 | DUOX1    | 5.708171319 | Tumor_G1 |
| 2378 | DUOXA1   | 5.593440002 | Tumor_G1 |
| 2379 | DUOX2    | 5.731903927 | Tumor_G1 |
| 2380 | DUOXA2   | 3.383160694 | Tumor_G1 |
| 2381 | NDUFA1   | 7.401557894 | Tumor_G1 |
| 2382 | NDUFA2   | 6.201967531 | Tumor_G1 |
| 2383 | NDUFA8   | 6.478372477 | Tumor_G1 |
| 2384 | NDUFB1   | 4.927029398 | Tumor_G1 |
| 2385 | NDUFB10  | 6.895653816 | Tumor_G1 |
| 2386 | NDUFB2   | 5.758062563 | Tumor_G1 |
| 2387 | NDUFB3   | 5.905190029 | Tumor_G1 |
| 2388 | NDUFB7   | 7.651911662 | Tumor_G1 |
| 2389 | CYC1     | 5.986554922 | Tumor_G1 |
| 2390 | ETFB     | 3.922045802 | Tumor_G1 |
| 2391 | UQCR10   | 7.017344823 | Tumor_G1 |
| 2392 | UQCRQ    | 6.638636974 | Tumor_G1 |
| 2393 | UQCC3    | 3.382495985 | Tumor_G1 |
| 2394 | COX15    | 4.315469729 | Tumor_G1 |
| 2395 | COX5A    | 6.596803672 | Tumor_G1 |
| 2396 | COX6B1   | 8.113711966 | Tumor_G1 |
| 2397 | COX6C    | 5.86302626  | Tumor_G1 |
| 2398 | COX7A2   | 6.27729092  | Tumor_G1 |

|      |          |             |          |
|------|----------|-------------|----------|
| 2399 | COX7B    | 5.502655354 | Tumor_G1 |
| 2400 | COX8A    | 8.675725249 | Tumor_G1 |
| 2401 | SCO1     | 2.691153785 | Tumor_G1 |
| 2402 | SURF1    | 5.448892697 | Tumor_G1 |
| 2403 | ATP6V1E1 | 6.883243414 | Tumor_G1 |
| 2404 | DLAT     | 5.012912662 | Tumor_G1 |
| 2405 | PDC      | 0           | Tumor_G1 |
| 2406 | SUCLG2   | 6.05128174  | Tumor_G1 |
| 2407 | SLC25A5  | 7.633466599 | Tumor_G1 |
| 2408 | UCP2     | 7.291392917 | Tumor_G1 |
| 2409 | SOD2     | 6.565109782 | Tumor_G1 |
| 2410 | NOX4     | 3.092093202 | Tumor_G1 |
| 2411 | DUOX1    | 5.513125917 | Tumor_G1 |
| 2412 | DUOXA1   | 5.388520295 | Tumor_G1 |
| 2413 | DUOX2    | 5.045788199 | Tumor_G1 |
| 2414 | DUOXA2   | 2.717172176 | Tumor_G1 |
| 2415 | NDUFA1   | 7.779441606 | Tumor_G1 |
| 2416 | NDUFA2   | 6.449603501 | Tumor_G1 |
| 2417 | NDUFA8   | 6.850677228 | Tumor_G1 |
| 2418 | NDUFB1   | 5.301191044 | Tumor_G1 |
| 2419 | NDUFB10  | 7.273183328 | Tumor_G1 |
| 2420 | NDUFB2   | 6.203722339 | Tumor_G1 |
| 2421 | NDUFB3   | 6.001469116 | Tumor_G1 |
| 2422 | NDUFB7   | 8.002502397 | Tumor_G1 |
| 2423 | CYC1     | 6.815470048 | Tumor_G1 |
| 2424 | ETFB     | 4.791101575 | Tumor_G1 |
| 2425 | UQCR10   | 7.368287045 | Tumor_G1 |
| 2426 | UQCRQ    | 6.733629567 | Tumor_G1 |
| 2427 | UQCC3    | 3.585419314 | Tumor_G1 |
| 2428 | COX15    | 5.026189301 | Tumor_G1 |
| 2429 | COX5A    | 6.907967031 | Tumor_G1 |
| 2430 | COX6B1   | 8.411747964 | Tumor_G1 |
| 2431 | COX6C    | 6.185484831 | Tumor_G1 |
| 2432 | COX7A2   | 6.64209383  | Tumor_G1 |
| 2433 | COX7B    | 6.173919094 | Tumor_G1 |
| 2434 | COX8A    | 9.538794887 | Tumor_G1 |
| 2435 | SCO1     | 3.550675344 | Tumor_G1 |
| 2436 | SURF1    | 6.412751891 | Tumor_G1 |
| 2437 | ATP6V1E1 | 6.784101767 | Tumor_G1 |
| 2438 | DLAT     | 5.223547573 | Tumor_G1 |

|      |          |             |          |
|------|----------|-------------|----------|
| 2439 | PDC      | 0.223688933 | Tumor_G1 |
| 2440 | SUCLG2   | 5.985010503 | Tumor_G1 |
| 2441 | SLC25A5  | 8.563166312 | Tumor_G1 |
| 2442 | UCP2     | 7.389687027 | Tumor_G1 |
| 2443 | SOD2     | 6.423075057 | Tumor_G1 |
| 2444 | NOX4     | 1.990866883 | Tumor_G1 |
| 2445 | DUOX1    | 5.86272406  | Tumor_G1 |
| 2446 | DUOXA1   | 6.098436734 | Tumor_G1 |
| 2447 | DUOX2    | 6.051436174 | Tumor_G1 |
| 2448 | DUOXA2   | 2.953929348 | Tumor_G1 |
| 2449 | NDUFA1   | 7.385345298 | Tumor_G1 |
| 2450 | NDUFA2   | 6.271713796 | Tumor_G1 |
| 2451 | NDUFA8   | 6.928346126 | Tumor_G1 |
| 2452 | NDUFB1   | 5.208273888 | Tumor_G1 |
| 2453 | NDUFB10  | 7.428466194 | Tumor_G1 |
| 2454 | NDUFB2   | 6.472584737 | Tumor_G1 |
| 2455 | NDUFB3   | 5.384854376 | Tumor_G1 |
| 2456 | NDUFB7   | 8.361560908 | Tumor_G1 |
| 2457 | CYC1     | 7.293692311 | Tumor_G1 |
| 2458 | ETFB     | 4.762868827 | Tumor_G1 |
| 2459 | UQCR10   | 7.117789887 | Tumor_G1 |
| 2460 | UQCRQ    | 6.838864208 | Tumor_G1 |
| 2461 | UQCC3    | 4.494745163 | Tumor_G1 |
| 2462 | COX15    | 5.13353249  | Tumor_G1 |
| 2463 | COX5A    | 7.187504417 | Tumor_G1 |
| 2464 | COX6B1   | 8.45840404  | Tumor_G1 |
| 2465 | COX6C    | 6.206403069 | Tumor_G1 |
| 2466 | COX7A2   | 6.442557388 | Tumor_G1 |
| 2467 | COX7B    | 5.901934799 | Tumor_G1 |
| 2468 | COX8A    | 9.40880123  | Tumor_G1 |
| 2469 | SCO1     | 3.422479856 | Tumor_G1 |
| 2470 | SURF1    | 6.598758811 | Tumor_G1 |
| 2471 | ATP6V1E1 | 6.838210959 | Tumor_G1 |
| 2472 | DLAT     | 4.946491543 | Tumor_G1 |
| 2473 | PDC      | 0           | Tumor_G1 |
| 2474 | SUCLG2   | 6.639092506 | Tumor_G1 |
| 2475 | SLC25A5  | 9.005569873 | Tumor_G1 |
| 2476 | UCP2     | 6.506269559 | Tumor_G1 |
| 2477 | SOD2     | 5.018604692 | Tumor_G1 |
| 2478 | NOX4     | 1.377403222 | Tumor_G1 |

|      |          |             |          |
|------|----------|-------------|----------|
| 2479 | DUOX1    | 5.741160701 | Tumor_G1 |
| 2480 | DUOXA1   | 6.002060131 | Tumor_G1 |
| 2481 | DUOX2    | 6.575231554 | Tumor_G1 |
| 2482 | DUOXA2   | 4.150109186 | Tumor_G1 |
| 2483 | NDUFA1   | 7.526724628 | Tumor_G1 |
| 2484 | NDUFA2   | 5.810163624 | Tumor_G1 |
| 2485 | NDUFA8   | 6.753129758 | Tumor_G1 |
| 2486 | NDUFB1   | 5.020115393 | Tumor_G1 |
| 2487 | NDUFB10  | 7.176682768 | Tumor_G1 |
| 2488 | NDUFB2   | 5.678300543 | Tumor_G1 |
| 2489 | NDUFB3   | 6.047329985 | Tumor_G1 |
| 2490 | NDUFB7   | 7.943849937 | Tumor_G1 |
| 2491 | CYC1     | 6.33882935  | Tumor_G1 |
| 2492 | ETFB     | 4.545534901 | Tumor_G1 |
| 2493 | UQCR10   | 7.575463469 | Tumor_G1 |
| 2494 | UQCRQ    | 7.000988955 | Tumor_G1 |
| 2495 | UQCC3    | 3.008129031 | Tumor_G1 |
| 2496 | COX15    | 4.545947107 | Tumor_G1 |
| 2497 | COX5A    | 6.963369319 | Tumor_G1 |
| 2498 | COX6B1   | 8.504345434 | Tumor_G1 |
| 2499 | COX6C    | 5.946011819 | Tumor_G1 |
| 2500 | COX7A2   | 6.8032038   | Tumor_G1 |
| 2501 | COX7B    | 6.259929173 | Tumor_G1 |
| 2502 | COX8A    | 8.796351249 | Tumor_G1 |
| 2503 | SCO1     | 2.764221725 | Tumor_G1 |
| 2504 | SURF1    | 5.299191857 | Tumor_G1 |
| 2505 | ATP6V1E1 | 7.333531981 | Tumor_G1 |
| 2506 | DLAT     | 5.399902842 | Tumor_G1 |
| 2507 | PDC      | 0.170889799 | Tumor_G1 |
| 2508 | SUCLG2   | 6.52047178  | Tumor_G1 |
| 2509 | SLC25A5  | 8.447200509 | Tumor_G1 |
| 2510 | UCP2     | 8.245566134 | Tumor_G1 |
| 2511 | SOD2     | 5.064045897 | Tumor_G1 |
| 2512 | NOX4     | 3.465339994 | Tumor_G1 |
| 2513 | DUOX1    | 5.116313499 | Tumor_G1 |
| 2514 | DUOXA1   | 5.719536035 | Tumor_G1 |
| 2515 | DUOX2    | 5.088464139 | Tumor_G1 |
| 2516 | DUOXA2   | 2.168076565 | Tumor_G1 |
| 2517 | NDUFA1   | 7.344320086 | Tumor_G1 |
| 2518 | NDUFA2   | 5.946222618 | Tumor_G1 |

|      |          |             |          |
|------|----------|-------------|----------|
| 2519 | NDUFA8   | 6.739860395 | Tumor_G1 |
| 2520 | NDUFB1   | 5.024303928 | Tumor_G1 |
| 2521 | NDUFB10  | 7.164050359 | Tumor_G1 |
| 2522 | NDUFB2   | 5.955390717 | Tumor_G1 |
| 2523 | NDUFB3   | 5.973773524 | Tumor_G1 |
| 2524 | NDUFB7   | 7.72896463  | Tumor_G1 |
| 2525 | CYC1     | 6.268617645 | Tumor_G1 |
| 2526 | ETFB     | 4.436296675 | Tumor_G1 |
| 2527 | UQCR10   | 7.051610951 | Tumor_G1 |
| 2528 | UQCRQ    | 6.658084573 | Tumor_G1 |
| 2529 | UQCC3    | 3.794793932 | Tumor_G1 |
| 2530 | COX15    | 4.886220536 | Tumor_G1 |
| 2531 | COX5A    | 6.630676794 | Tumor_G1 |
| 2532 | COX6B1   | 8.000125645 | Tumor_G1 |
| 2533 | COX6C    | 5.845020464 | Tumor_G1 |
| 2534 | COX7A2   | 6.273563023 | Tumor_G1 |
| 2535 | COX7B    | 5.563241609 | Tumor_G1 |
| 2536 | COX8A    | 8.591274241 | Tumor_G1 |
| 2537 | SCO1     | 3.412286739 | Tumor_G1 |
| 2538 | SURF1    | 5.773389988 | Tumor_G1 |
| 2539 | ATP6V1E1 | 6.755016069 | Tumor_G1 |
| 2540 | DLAT     | 5.263645272 | Tumor_G1 |
| 2541 | PDC      | 0.236886214 | Tumor_G1 |
| 2542 | SUCLG2   | 6.076424744 | Tumor_G1 |
| 2543 | SLC25A5  | 7.850128231 | Tumor_G1 |
| 2544 | UCP2     | 7.738685311 | Tumor_G1 |
| 2545 | SOD2     | 5.618836576 | Tumor_G1 |
| 2546 | NOX4     | 2.729976526 | Tumor_G1 |
| 2547 | DUOX1    | 6.01901711  | Tumor_G1 |
| 2548 | DUOXA1   | 6.177073901 | Tumor_G1 |
| 2549 | DUOX2    | 6.297340902 | Tumor_G1 |
| 2550 | DUOXA2   | 4.346426766 | Tumor_G1 |
| 2551 | NDUFA1   | 7.330875288 | Tumor_G1 |
| 2552 | NDUFA2   | 5.946186517 | Tumor_G1 |
| 2553 | NDUFA8   | 6.582778946 | Tumor_G1 |
| 2554 | NDUFB1   | 5.148168371 | Tumor_G1 |
| 2555 | NDUFB10  | 7.006704745 | Tumor_G1 |
| 2556 | NDUFB2   | 6.001683434 | Tumor_G1 |
| 2557 | NDUFB3   | 5.971426232 | Tumor_G1 |
| 2558 | NDUFB7   | 7.715573867 | Tumor_G1 |



|      |          |             |          |
|------|----------|-------------|----------|
| 2559 | CYC1     | 6.498398556 | Tumor_G1 |
| 2560 | ETFB     | 4.126631616 | Tumor_G1 |
| 2561 | UQCR10   | 6.996384945 | Tumor_G1 |
| 2562 | UQCRQ    | 6.593428034 | Tumor_G1 |
| 2563 | UQCC3    | 3.523648167 | Tumor_G1 |
| 2564 | COX15    | 4.878974164 | Tumor_G1 |
| 2565 | COX5A    | 6.995664829 | Tumor_G1 |
| 2566 | COX6B1   | 8.168012235 | Tumor_G1 |
| 2567 | COX6C    | 5.983105619 | Tumor_G1 |
| 2568 | COX7A2   | 6.55386283  | Tumor_G1 |
| 2569 | COX7B    | 5.767059111 | Tumor_G1 |
| 2570 | COX8A    | 8.854471311 | Tumor_G1 |
| 2571 | SCO1     | 3.225003433 | Tumor_G1 |
| 2572 | SURF1    | 5.881430124 | Tumor_G1 |
| 2573 | ATP6V1E1 | 7.115530967 | Tumor_G1 |
| 2574 | DLAT     | 5.475793662 | Tumor_G1 |
| 2575 | PDC      | 0.110160576 | Tumor_G1 |
| 2576 | SUCLG2   | 6.53400743  | Tumor_G1 |
| 2577 | SLC25A5  | 8.707432575 | Tumor_G1 |
| 2578 | UCP2     | 8.339014461 | Tumor_G1 |
| 2579 | SOD2     | 7.003326552 | Tumor_G1 |
| 2580 | NOX4     | 3.295590339 | Tumor_G1 |
| 2581 | DUOX1    | 5.319823027 | Tumor_G1 |
| 2582 | DUOXA1   | 5.187812565 | Tumor_G1 |
| 2583 | DUOX2    | 5.524548407 | Tumor_G1 |
| 2584 | DUOXA2   | 2.956069188 | Tumor_G1 |
| 2585 | NDUFA1   | 7.423078547 | Tumor_G1 |
| 2586 | NDUFA2   | 6.213442344 | Tumor_G1 |
| 2587 | NDUFA8   | 6.489652225 | Tumor_G1 |
| 2588 | NDUFB1   | 5.095274356 | Tumor_G1 |
| 2589 | NDUFB10  | 6.763162858 | Tumor_G1 |
| 2590 | NDUFB2   | 5.745723865 | Tumor_G1 |
| 2591 | NDUFB3   | 5.836397134 | Tumor_G1 |
| 2592 | NDUFB7   | 7.416019271 | Tumor_G1 |
| 2593 | CYC1     | 6.367973463 | Tumor_G1 |
| 2594 | ETFB     | 4.384488854 | Tumor_G1 |
| 2595 | UQCR10   | 6.939237879 | Tumor_G1 |
| 2596 | UQCRQ    | 6.453788085 | Tumor_G1 |
| 2597 | UQCC3    | 3.688694873 | Tumor_G1 |
| 2598 | COX15    | 4.7510378   | Tumor_G1 |

|      |          |             |          |
|------|----------|-------------|----------|
| 2599 | COX5A    | 6.655480734 | Tumor_G1 |
| 2600 | COX6B1   | 8.236542913 | Tumor_G1 |
| 2601 | COX6C    | 5.819066145 | Tumor_G1 |
| 2602 | COX7A2   | 6.116371396 | Tumor_G1 |
| 2603 | COX7B    | 5.672942072 | Tumor_G1 |
| 2604 | COX8A    | 8.94559279  | Tumor_G1 |
| 2605 | SCO1     | 3.144195987 | Tumor_G1 |
| 2606 | SURF1    | 6.000165223 | Tumor_G1 |
| 2607 | ATP6V1E1 | 6.786038901 | Tumor_G1 |
| 2608 | DLAT     | 4.622744515 | Tumor_G1 |
| 2609 | PDC      | 0           | Tumor_G1 |
| 2610 | SUCLG2   | 5.792245395 | Tumor_G1 |
| 2611 | SLC25A5  | 8.594167676 | Tumor_G1 |
| 2612 | UCP2     | 8.40197727  | Tumor_G1 |
| 2613 | SOD2     | 6.699984217 | Tumor_G1 |
| 2614 | NOX4     | 2.835066639 | Tumor_G1 |
| 2615 | DUOX1    | 5.649205575 | Tumor_G1 |
| 2616 | DUOXA1   | 5.507835244 | Tumor_G1 |
| 2617 | DUOX2    | 5.672703591 | Tumor_G1 |
| 2618 | DUOXA2   | 2.670550235 | Tumor_G1 |
| 2619 | NDUFA1   | 7.746343133 | Tumor_G1 |
| 2620 | NDUFA2   | 5.924923536 | Tumor_G1 |
| 2621 | NDUFA8   | 6.865313493 | Tumor_G1 |
| 2622 | NDUFB1   | 5.528102714 | Tumor_G1 |
| 2623 | NDUFB10  | 7.095395817 | Tumor_G1 |
| 2624 | NDUFB2   | 5.191580769 | Tumor_G1 |
| 2625 | NDUFB3   | 5.884751023 | Tumor_G1 |
| 2626 | NDUFB7   | 8.300125668 | Tumor_G1 |
| 2627 | CYC1     | 5.831646448 | Tumor_G1 |
| 2628 | ETFB     | 4.365628042 | Tumor_G1 |
| 2629 | UQCR10   | 6.83320082  | Tumor_G1 |
| 2630 | UQCRQ    | 6.665846545 | Tumor_G1 |
| 2631 | UQCC3    | 3.45689329  | Tumor_G1 |
| 2632 | COX15    | 4.180083365 | Tumor_G1 |
| 2633 | COX5A    | 6.592813311 | Tumor_G1 |
| 2634 | COX6B1   | 8.836173814 | Tumor_G1 |
| 2635 | COX6C    | 5.754876644 | Tumor_G1 |
| 2636 | COX7A2   | 6.765545333 | Tumor_G1 |
| 2637 | COX7B    | 6.032031927 | Tumor_G1 |
| 2638 | COX8A    | 8.281022132 | Tumor_G1 |

|      |          |             |          |
|------|----------|-------------|----------|
| 2639 | SCO1     | 2.765546232 | Tumor_G1 |
| 2640 | SURF1    | 5.886605759 | Tumor_G1 |
| 2641 | ATP6V1E1 | 5.736645423 | Tumor_G1 |
| 2642 | DLAT     | 4.440675445 | Tumor_G1 |
| 2643 | PDC      | 0.216856301 | Tumor_G1 |
| 2644 | SUCLG2   | 5.700815353 | Tumor_G1 |
| 2645 | SLC25A5  | 6.899761574 | Tumor_G1 |
| 2646 | UCP2     | 7.843503452 | Tumor_G1 |
| 2647 | SOD2     | 3.918502881 | Tumor_G1 |
| 2648 | NOX4     | 2.824794419 | Tumor_G1 |
| 2649 | DUOX1    | 5.84129958  | Tumor_G1 |
| 2650 | DUOXA1   | 6.456780059 | Tumor_G1 |
| 2651 | DUOX2    | 7.731101689 | Tumor_G1 |
| 2652 | DUOXA2   | 4.802482398 | Tumor_G1 |
| 2653 | NDUFA1   | 7.55663962  | Tumor_G1 |
| 2654 | NDUFA2   | 6.430065159 | Tumor_G1 |
| 2655 | NDUFA8   | 6.316079014 | Tumor_G1 |
| 2656 | NDUFB1   | 5.257923561 | Tumor_G1 |
| 2657 | NDUFB10  | 6.736781634 | Tumor_G1 |
| 2658 | NDUFB2   | 5.711028141 | Tumor_G1 |
| 2659 | NDUFB3   | 6.127548806 | Tumor_G1 |
| 2660 | NDUFB7   | 7.753800034 | Tumor_G1 |
| 2661 | CYC1     | 5.914697332 | Tumor_G1 |
| 2662 | ETFB     | 4.422091613 | Tumor_G1 |
| 2663 | UQCR10   | 6.994018075 | Tumor_G1 |
| 2664 | UQCRQ    | 6.948134563 | Tumor_G1 |
| 2665 | UQCC3    | 3.237218573 | Tumor_G1 |
| 2666 | COX15    | 4.298152714 | Tumor_G1 |
| 2667 | COX5A    | 6.965365893 | Tumor_G1 |
| 2668 | COX6B1   | 8.271166814 | Tumor_G1 |
| 2669 | COX6C    | 6.130132504 | Tumor_G1 |
| 2670 | COX7A2   | 6.464256204 | Tumor_G1 |
| 2671 | COX7B    | 5.737894092 | Tumor_G1 |
| 2672 | COX8A    | 8.394858233 | Tumor_G1 |
| 2673 | SCO1     | 2.300390487 | Tumor_G1 |
| 2674 | SURF1    | 5.780650682 | Tumor_G1 |
| 2675 | ATP6V1E1 | 6.916913392 | Tumor_G1 |
| 2676 | DLAT     | 4.828796124 | Tumor_G1 |
| 2677 | PDC      | 0.040519914 | Tumor_G1 |
| 2678 | SUCLG2   | 6.039789203 | Tumor_G1 |

|      |          |             |          |
|------|----------|-------------|----------|
| 2679 | SLC25A5  | 7.526737883 | Tumor_G1 |
| 2680 | UCP2     | 7.755588994 | Tumor_G1 |
| 2681 | SOD2     | 6.07646076  | Tumor_G1 |
| 2682 | NOX4     | 2.454115426 | Tumor_G1 |
| 2683 | DUOX1    | 4.440682908 | Tumor_G1 |
| 2684 | DUOXA1   | 5.099813524 | Tumor_G1 |
| 2685 | DUOX2    | 4.002609723 | Tumor_G1 |
| 2686 | DUOXA2   | 1.911779956 | Tumor_G1 |
| 2687 | NDUFA1   | 8.114768575 | Tumor_G1 |
| 2688 | NDUFA2   | 6.107793006 | Tumor_G1 |
| 2689 | NDUFA8   | 7.056211929 | Tumor_G1 |
| 2690 | NDUFB1   | 5.338773911 | Tumor_G1 |
| 2691 | NDUFB10  | 7.256070411 | Tumor_G1 |
| 2692 | NDUFB2   | 5.643100067 | Tumor_G1 |
| 2693 | NDUFB3   | 6.258848984 | Tumor_G1 |
| 2694 | NDUFB7   | 8.348750124 | Tumor_G1 |
| 2695 | CYC1     | 6.545081901 | Tumor_G1 |
| 2696 | ETFB     | 4.510936525 | Tumor_G1 |
| 2697 | UQCR10   | 7.804561472 | Tumor_G1 |
| 2698 | UQCRQ    | 6.743655307 | Tumor_G1 |
| 2699 | UQCC3    | 3.78365686  | Tumor_G1 |
| 2700 | COX15    | 5.100481076 | Tumor_G1 |
| 2701 | COX5A    | 6.261369242 | Tumor_G1 |
| 2702 | COX6B1   | 8.617097532 | Tumor_G1 |
| 2703 | COX6C    | 6.052161367 | Tumor_G1 |
| 2704 | COX7A2   | 6.79399622  | Tumor_G1 |
| 2705 | COX7B    | 6.338076899 | Tumor_G1 |
| 2706 | COX8A    | 8.923951819 | Tumor_G1 |
| 2707 | SCO1     | 4.456268107 | Tumor_G1 |
| 2708 | SURF1    | 5.583520624 | Tumor_G1 |
| 2709 | ATP6V1E1 | 6.487770007 | Tumor_G1 |
| 2710 | DLAT     | 4.886681737 | Tumor_G1 |
| 2711 | PDC      | 0.303570671 | Tumor_G1 |
| 2712 | SUCLG2   | 6.147835546 | Tumor_G1 |
| 2713 | SLC25A5  | 8.165215822 | Tumor_G1 |
| 2714 | UCP2     | 6.942314786 | Tumor_G1 |
| 2715 | SOD2     | 3.699224729 | Tumor_G1 |
| 2716 | NOX4     | 2.228554537 | Tumor_G1 |
| 2717 | DUOX1    | 5.905744386 | Tumor_G1 |
| 2718 | DUOXA1   | 5.522330123 | Tumor_G1 |

|      |          |             |          |
|------|----------|-------------|----------|
| 2719 | DUOX2    | 6.055587839 | Tumor_G1 |
| 2720 | DUOXA2   | 6.005246851 | Tumor_G1 |
| 2721 | NDUFA1   | 7.963132887 | Tumor_G1 |
| 2722 | NDUFA2   | 6.356127077 | Tumor_G1 |
| 2723 | NDUFA8   | 6.282337787 | Tumor_G1 |
| 2724 | NDUFB1   | 5.29710309  | Tumor_G1 |
| 2725 | NDUFB10  | 6.541922105 | Tumor_G1 |
| 2726 | NDUFB2   | 5.192955359 | Tumor_G1 |
| 2727 | NDUFB3   | 6.110368825 | Tumor_G1 |
| 2728 | NDUFB7   | 7.935192585 | Tumor_G1 |
| 2729 | CYC1     | 6.082754866 | Tumor_G1 |
| 2730 | ETFB     | 3.510986122 | Tumor_G1 |
| 2731 | UQCR10   | 6.991366    | Tumor_G1 |
| 2732 | UQCRQ    | 6.949635396 | Tumor_G1 |
| 2733 | UQCC3    | 2.675874913 | Tumor_G1 |
| 2734 | COX15    | 4.473859894 | Tumor_G1 |
| 2735 | COX5A    | 6.867876004 | Tumor_G1 |
| 2736 | COX6B1   | 8.615315552 | Tumor_G1 |
| 2737 | COX6C    | 5.810092828 | Tumor_G1 |
| 2738 | COX7A2   | 6.417630251 | Tumor_G1 |
| 2739 | COX7B    | 5.799931162 | Tumor_G1 |
| 2740 | COX8A    | 7.959697163 | Tumor_G1 |
| 2741 | SCO1     | 2.915448995 | Tumor_G1 |
| 2742 | SURF1    | 4.9193742   | Tumor_G1 |
| 2743 | ATP6V1E1 | 6.292060667 | Tumor_G1 |
| 2744 | DLAT     | 4.270749468 | Tumor_G1 |
| 2745 | PDC      | 0.177462423 | Tumor_G1 |
| 2746 | SUCLG2   | 5.660310827 | Tumor_G1 |
| 2747 | SLC25A5  | 7.996439447 | Tumor_G1 |
| 2748 | UCP2     | 7.115995707 | Tumor_G1 |
| 2749 | SOD2     | 5.255134521 | Tumor_G1 |
| 2750 | NOX4     | 2.981893742 | Tumor_G1 |
| 2751 | DUOX1    | 5.734344516 | Tumor_G1 |
| 2752 | DUOXA1   | 4.762427839 | Tumor_G1 |
| 2753 | DUOX2    | 6.992375752 | Tumor_G1 |
| 2754 | DUOXA2   | 4.722905255 | Tumor_G1 |
| 2755 | NDUFA1   | 7.915150846 | Tumor_G1 |
| 2756 | NDUFA2   | 5.803708794 | Tumor_G1 |
| 2757 | NDUFA8   | 6.741787607 | Tumor_G1 |
| 2758 | NDUFB1   | 5.629843492 | Tumor_G1 |

|      |          |             |          |
|------|----------|-------------|----------|
| 2759 | NDUFB10  | 6.980869361 | Tumor_G1 |
| 2760 | NDUFB2   | 5.668402839 | Tumor_G1 |
| 2761 | NDUFB3   | 6.443123101 | Tumor_G1 |
| 2762 | NDUFB7   | 7.796672163 | Tumor_G1 |
| 2763 | CYC1     | 5.973633831 | Tumor_G1 |
| 2764 | ETFB     | 4.493547725 | Tumor_G1 |
| 2765 | UQCR10   | 7.241799028 | Tumor_G1 |
| 2766 | UQCRQ    | 6.601158399 | Tumor_G1 |
| 2767 | UQCC3    | 3.369449819 | Tumor_G1 |
| 2768 | COX15    | 5.255686438 | Tumor_G1 |
| 2769 | COX5A    | 6.316994922 | Tumor_G1 |
| 2770 | COX6B1   | 8.335087284 | Tumor_G1 |
| 2771 | COX6C    | 5.919015063 | Tumor_G1 |
| 2772 | COX7A2   | 6.658690935 | Tumor_G1 |
| 2773 | COX7B    | 6.200101363 | Tumor_G1 |
| 2774 | COX8A    | 8.191595583 | Tumor_G1 |
| 2775 | SCO1     | 3.689367161 | Tumor_G1 |
| 2776 | SURF1    | 6.051154134 | Tumor_G1 |
| 2777 | ATP6V1E1 | 6.589695881 | Tumor_G1 |
| 2778 | DLAT     | 5.111108424 | Tumor_G1 |
| 2779 | PDC      | 0.1160961   | Tumor_G1 |
| 2780 | SUCLG2   | 5.896565369 | Tumor_G1 |
| 2781 | SLC25A5  | 7.483479586 | Tumor_G1 |
| 2782 | UCP2     | 8.644147645 | Tumor_G1 |
| 2783 | SOD2     | 5.064958859 | Tumor_G1 |
| 2784 | NOX4     | 2.663998331 | Tumor_G1 |
| 2785 | DUOX1    | 6.749935589 | Tumor_G1 |
| 2786 | DUOXA1   | 6.88890108  | Tumor_G1 |
| 2787 | DUOX2    | 7.647524529 | Tumor_G1 |
| 2788 | DUOXA2   | 5.252614972 | Tumor_G1 |
| 2789 | NDUFA1   | 7.911001379 | Tumor_G1 |
| 2790 | NDUFA2   | 6.522408484 | Tumor_G1 |
| 2791 | NDUFA8   | 6.707540218 | Tumor_G1 |
| 2792 | NDUFB1   | 5.443764051 | Tumor_G1 |
| 2793 | NDUFB10  | 7.226018373 | Tumor_G1 |
| 2794 | NDUFB2   | 6.360846065 | Tumor_G1 |
| 2795 | NDUFB3   | 6.343470061 | Tumor_G1 |
| 2796 | NDUFB7   | 8.337324443 | Tumor_G1 |
| 2797 | CYC1     | 6.506498168 | Tumor_G1 |
| 2798 | ETFB     | 4.477842636 | Tumor_G1 |

|      |          |             |          |
|------|----------|-------------|----------|
| 2799 | UQCR10   | 7.188408151 | Tumor_G1 |
| 2800 | UQCRQ    | 7.062252513 | Tumor_G1 |
| 2801 | UQCC3    | 3.777649971 | Tumor_G1 |
| 2802 | COX15    | 5.032301643 | Tumor_G1 |
| 2803 | COX5A    | 6.90255445  | Tumor_G1 |
| 2804 | COX6B1   | 8.442804397 | Tumor_G1 |
| 2805 | COX6C    | 6.138897162 | Tumor_G1 |
| 2806 | COX7A2   | 6.843820977 | Tumor_G1 |
| 2807 | COX7B    | 5.970566885 | Tumor_G1 |
| 2808 | COX8A    | 9.144524698 | Tumor_G1 |
| 2809 | SCO1     | 3.505874218 | Tumor_G1 |
| 2810 | SURF1    | 6.067186137 | Tumor_G1 |
| 2811 | ATP6V1E1 | 6.879730054 | Tumor_G1 |
| 2812 | DLAT     | 5.743320154 | Tumor_G1 |
| 2813 | PDC      | 0.40971353  | Tumor_G1 |
| 2814 | SUCLG2   | 6.265838437 | Tumor_G1 |
| 2815 | SLC25A5  | 8.020019621 | Tumor_G1 |
| 2816 | UCP2     | 7.904506048 | Tumor_G1 |
| 2817 | SOD2     | 5.602907517 | Tumor_G1 |
| 2818 | NOX4     | 3.549987749 | Tumor_G1 |
| 2819 | DUOX1    | 5.834686669 | Tumor_G1 |
| 2820 | DUOXA1   | 6.101387011 | Tumor_G1 |
| 2821 | DUOX2    | 7.019266444 | Tumor_G1 |
| 2822 | DUOXA2   | 4.741006184 | Tumor_G1 |
| 2823 | NDUFA1   | 7.846095269 | Tumor_G1 |
| 2824 | NDUFA2   | 6.404683647 | Tumor_G1 |
| 2825 | NDUFA8   | 6.871479641 | Tumor_G1 |
| 2826 | NDUFB1   | 5.431357571 | Tumor_G1 |
| 2827 | NDUFB10  | 7.042878819 | Tumor_G1 |
| 2828 | NDUFB2   | 6.736594397 | Tumor_G1 |
| 2829 | NDUFB3   | 6.453897251 | Tumor_G1 |
| 2830 | NDUFB7   | 8.070003657 | Tumor_G1 |
| 2831 | CYC1     | 6.556770678 | Tumor_G1 |
| 2832 | ETFB     | 4.392711465 | Tumor_G1 |
| 2833 | UQCR10   | 7.449609315 | Tumor_G1 |
| 2834 | UQCRQ    | 7.184160583 | Tumor_G1 |
| 2835 | UQCC3    | 3.739798651 | Tumor_G1 |
| 2836 | COX15    | 4.96764442  | Tumor_G1 |
| 2837 | COX5A    | 7.17814779  | Tumor_G1 |
| 2838 | COX6B1   | 8.433348168 | Tumor_G1 |

|      |          |             |          |
|------|----------|-------------|----------|
| 2839 | COX6C    | 6.29902431  | Tumor_G1 |
| 2840 | COX7A2   | 6.684803333 | Tumor_G1 |
| 2841 | COX7B    | 5.986339616 | Tumor_G1 |
| 2842 | COX8A    | 9.130637782 | Tumor_G1 |
| 2843 | SCO1     | 3.49368645  | Tumor_G1 |
| 2844 | SURF1    | 6.11207123  | Tumor_G1 |
| 2845 | ATP6V1E1 | 7.295012785 | Tumor_G1 |
| 2846 | DLAT     | 5.65356934  | Tumor_G1 |
| 2847 | PDC      | 0           | Tumor_G1 |
| 2848 | SUCLG2   | 6.605611938 | Tumor_G1 |
| 2849 | SLC25A5  | 8.561777192 | Tumor_G1 |
| 2850 | UCP2     | 8.034110121 | Tumor_G1 |
| 2851 | SOD2     | 5.578304893 | Tumor_G1 |
| 2852 | NOX4     | 1.026978104 | Tumor_G1 |
| 2853 | DUOX1    | 6.140035801 | Tumor_G1 |
| 2854 | DUOXA1   | 6.031003268 | Tumor_G1 |
| 2855 | DUOX2    | 6.001074304 | Tumor_G1 |
| 2856 | DUOXA2   | 3.927715299 | Tumor_G1 |
| 2857 | NDUFA1   | 7.705086621 | Tumor_G1 |
| 2858 | NDUFA2   | 6.47676721  | Tumor_G1 |
| 2859 | NDUFA8   | 6.577193284 | Tumor_G1 |
| 2860 | NDUFB1   | 5.603109623 | Tumor_G1 |
| 2861 | NDUFB10  | 7.250265363 | Tumor_G1 |
| 2862 | NDUFB2   | 6.271577112 | Tumor_G1 |
| 2863 | NDUFB3   | 6.129410227 | Tumor_G1 |
| 2864 | NDUFB7   | 8.194138811 | Tumor_G1 |
| 2865 | CYC1     | 6.387714078 | Tumor_G1 |
| 2866 | ETFB     | 4.300573119 | Tumor_G1 |
| 2867 | UQCR10   | 7.268735193 | Tumor_G1 |
| 2868 | UQCRQ    | 7.161535918 | Tumor_G1 |
| 2869 | UQCC3    | 3.760687129 | Tumor_G1 |
| 2870 | COX15    | 4.413649974 | Tumor_G1 |
| 2871 | COX5A    | 7.013968215 | Tumor_G1 |
| 2872 | COX6B1   | 8.341441358 | Tumor_G1 |
| 2873 | COX6C    | 6.183923411 | Tumor_G1 |
| 2874 | COX7A2   | 6.49770985  | Tumor_G1 |
| 2875 | COX7B    | 5.647426266 | Tumor_G1 |
| 2876 | COX8A    | 8.810346247 | Tumor_G1 |
| 2877 | SCO1     | 2.741579379 | Tumor_G1 |
| 2878 | SURF1    | 6.057794485 | Tumor_G1 |



|      |          |             |          |
|------|----------|-------------|----------|
| 2879 | ATP6V1E1 | 6.750580913 | Tumor_G1 |
| 2880 | DLAT     | 4.84513932  | Tumor_G1 |
| 2881 | PDC      | 0.228516721 | Tumor_G1 |
| 2882 | SUCLG2   | 6.053510892 | Tumor_G1 |
| 2883 | SLC25A5  | 7.855737771 | Tumor_G1 |
| 2884 | UCP2     | 7.539158071 | Tumor_G1 |
| 2885 | SOD2     | 5.804295278 | Tumor_G1 |
| 2886 | NOX4     | 2.899481897 | Tumor_G1 |
| 2887 | DUOX1    | 5.60475375  | Tumor_G1 |
| 2888 | DUOXA1   | 5.544681493 | Tumor_G1 |
| 2889 | DUOX2    | 5.946848022 | Tumor_G1 |
| 2890 | DUOXA2   | 3.850520313 | Tumor_G1 |
| 2891 | NDUFA1   | 7.877654332 | Tumor_G1 |
| 2892 | NDUFA2   | 6.395757566 | Tumor_G1 |
| 2893 | NDUFA8   | 6.663910673 | Tumor_G1 |
| 2894 | NDUFB1   | 5.240483208 | Tumor_G1 |
| 2895 | NDUFB10  | 7.242975281 | Tumor_G1 |
| 2896 | NDUFB2   | 6.027442367 | Tumor_G1 |
| 2897 | NDUFB3   | 6.370930726 | Tumor_G1 |
| 2898 | NDUFB7   | 8.257769527 | Tumor_G1 |
| 2899 | CYC1     | 6.607650168 | Tumor_G1 |
| 2900 | ETFB     | 4.734108993 | Tumor_G1 |
| 2901 | UQCR10   | 7.343373194 | Tumor_G1 |
| 2902 | UQCRQ    | 6.937232208 | Tumor_G1 |
| 2903 | UQCC3    | 3.924846239 | Tumor_G1 |
| 2904 | COX15    | 5.056388696 | Tumor_G1 |
| 2905 | COX5A    | 7.117009254 | Tumor_G1 |
| 2906 | COX6B1   | 8.259292386 | Tumor_G1 |
| 2907 | COX6C    | 6.192549079 | Tumor_G1 |
| 2908 | COX7A2   | 6.361775305 | Tumor_G1 |
| 2909 | COX7B    | 5.769042586 | Tumor_G1 |
| 2910 | COX8A    | 9.097478063 | Tumor_G1 |
| 2911 | SCO1     | 3.430147021 | Tumor_G1 |
| 2912 | SURF1    | 6.155877306 | Tumor_G1 |
| 2913 | ATP6V1E1 | 6.914313825 | Tumor_G1 |
| 2914 | DLAT     | 5.408146715 | Tumor_G1 |
| 2915 | PDC      | 0.11978372  | Tumor_G1 |
| 2916 | SUCLG2   | 6.384579853 | Tumor_G1 |
| 2917 | SLC25A5  | 8.060890769 | Tumor_G1 |
| 2918 | UCP2     | 8.429176648 | Tumor_G1 |

|      |          |             |          |
|------|----------|-------------|----------|
| 2919 | SOD2     | 5.74026618  | Tumor_G1 |
| 2920 | NOX4     | 3.377646795 | Tumor_G1 |
| 2921 | DUOX1    | 6.991928392 | Tumor_G1 |
| 2922 | DUOXA1   | 6.807124606 | Tumor_G1 |
| 2923 | DUOX2    | 7.163790982 | Tumor_G1 |
| 2924 | DUOXA2   | 4.524375354 | Tumor_G1 |
| 2925 | NDUFA1   | 7.660703569 | Tumor_G1 |
| 2926 | NDUFA2   | 6.585631172 | Tumor_G1 |
| 2927 | NDUFA8   | 6.735720019 | Tumor_G1 |
| 2928 | NDUFB1   | 5.373285065 | Tumor_G1 |
| 2929 | NDUFB10  | 7.101707038 | Tumor_G1 |
| 2930 | NDUFB2   | 6.496504951 | Tumor_G1 |
| 2931 | NDUFB3   | 6.342592605 | Tumor_G1 |
| 2932 | NDUFB7   | 8.424291703 | Tumor_G1 |
| 2933 | CYC1     | 6.687146152 | Tumor_G1 |
| 2934 | ETFB     | 4.698910706 | Tumor_G1 |
| 2935 | UQCR10   | 7.461848983 | Tumor_G1 |
| 2936 | UQCRQ    | 7.083461198 | Tumor_G1 |
| 2937 | UQCC3    | 3.914237535 | Tumor_G1 |
| 2938 | COX15    | 4.658544182 | Tumor_G1 |
| 2939 | COX5A    | 6.968376145 | Tumor_G1 |
| 2940 | COX6B1   | 8.447583318 | Tumor_G1 |
| 2941 | COX6C    | 6.17373633  | Tumor_G1 |
| 2942 | COX7A2   | 6.46809042  | Tumor_G1 |
| 2943 | COX7B    | 5.689555584 | Tumor_G1 |
| 2944 | COX8A    | 9.095263257 | Tumor_G1 |
| 2945 | SCO1     | 3.223635197 | Tumor_G1 |
| 2946 | SURF1    | 6.100665971 | Tumor_G1 |
| 2947 | ATP6V1E1 | 7.296326113 | Tumor_G1 |
| 2948 | DLAT     | 5.220827406 | Tumor_G1 |
| 2949 | PDC      | 0.289760805 | Tumor_G1 |
| 2950 | SUCLG2   | 6.378585848 | Tumor_G1 |
| 2951 | SLC25A5  | 8.001048143 | Tumor_G1 |
| 2952 | UCP2     | 8.514904296 | Tumor_G1 |
| 2953 | SOD2     | 6.07458776  | Tumor_G1 |
| 2954 | NOX4     | 2.824347198 | Tumor_G1 |
| 2955 | DUOX1    | 5.610763804 | Tumor_G1 |
| 2956 | DUOXA1   | 5.94720032  | Tumor_G1 |
| 2957 | DUOX2    | 5.621089437 | Tumor_G1 |
| 2958 | DUOXA2   | 3.851057016 | Tumor_G1 |

|      |          |             |          |
|------|----------|-------------|----------|
| 2959 | NDUFA1   | 7.90324109  | Tumor_G1 |
| 2960 | NDUFA2   | 6.430125943 | Tumor_G1 |
| 2961 | NDUFA8   | 6.86867008  | Tumor_G1 |
| 2962 | NDUFB1   | 5.539035264 | Tumor_G1 |
| 2963 | NDUFB10  | 7.103523275 | Tumor_G1 |
| 2964 | NDUFB2   | 6.43378968  | Tumor_G1 |
| 2965 | NDUFB3   | 6.276313048 | Tumor_G1 |
| 2966 | NDUFB7   | 8.363706267 | Tumor_G1 |
| 2967 | CYC1     | 6.823845093 | Tumor_G1 |
| 2968 | ETFB     | 4.776324951 | Tumor_G1 |
| 2969 | UQCR10   | 7.489964417 | Tumor_G1 |
| 2970 | UQCRQ    | 7.179468874 | Tumor_G1 |
| 2971 | UQCC3    | 4.084938753 | Tumor_G1 |
| 2972 | COX15    | 5.080106583 | Tumor_G1 |
| 2973 | COX5A    | 7.070254941 | Tumor_G1 |
| 2974 | COX6B1   | 8.330788066 | Tumor_G1 |
| 2975 | COX6C    | 6.231582641 | Tumor_G1 |
| 2976 | COX7A2   | 6.716985909 | Tumor_G1 |
| 2977 | COX7B    | 5.736321912 | Tumor_G1 |
| 2978 | COX8A    | 9.355898572 | Tumor_G1 |
| 2979 | SCO1     | 3.387680965 | Tumor_G1 |
| 2980 | SURF1    | 6.119852085 | Tumor_G1 |
| 2981 | ATP6V1E1 | 7.136579982 | Tumor_G1 |
| 2982 | DLAT     | 5.357624216 | Tumor_G1 |
| 2983 | PDC      | 0.089964793 | Tumor_G1 |
| 2984 | SUCLG2   | 6.312180986 | Tumor_G1 |
| 2985 | SLC25A5  | 8.300582966 | Tumor_G1 |
| 2986 | UCP2     | 8.427062625 | Tumor_G1 |
| 2987 | SOD2     | 6.737545355 | Tumor_G1 |
| 2988 | NOX4     | 2.892120346 | Tumor_G1 |
| 2989 | DUOX1    | 6.059859387 | Tumor_G1 |
| 2990 | DUOXA1   | 6.397217173 | Tumor_G1 |
| 2991 | DUOX2    | 6.478801571 | Tumor_G1 |
| 2992 | DUOXA2   | 4.642012917 | Tumor_G1 |
| 2993 | NDUFA1   | 7.53734307  | Tumor_G1 |
| 2994 | NDUFA2   | 5.617825597 | Tumor_G1 |
| 2995 | NDUFA8   | 6.510109146 | Tumor_G1 |
| 2996 | NDUFB1   | 5.054046169 | Tumor_G1 |
| 2997 | NDUFB10  | 6.897446519 | Tumor_G1 |
| 2998 | NDUFB2   | 5.13823356  | Tumor_G1 |

|      |          |             |          |
|------|----------|-------------|----------|
| 2999 | NDUFB3   | 5.834455161 | Tumor_G1 |
| 3000 | NDUFB7   | 7.780293171 | Tumor_G1 |
| 3001 | CYC1     | 5.832418392 | Tumor_G1 |
| 3002 | ETFB     | 3.842105569 | Tumor_G1 |
| 3003 | UQCR10   | 7.275541312 | Tumor_G1 |
| 3004 | UQCRQ    | 6.384939991 | Tumor_G1 |
| 3005 | UQCC3    | 2.77359217  | Tumor_G1 |
| 3006 | COX15    | 4.822656119 | Tumor_G1 |
| 3007 | COX5A    | 6.536377882 | Tumor_G1 |
| 3008 | COX6B1   | 8.424072462 | Tumor_G1 |
| 3009 | COX6C    | 5.418075501 | Tumor_G1 |
| 3010 | COX7A2   | 6.588054048 | Tumor_G1 |
| 3011 | COX7B    | 5.815295808 | Tumor_G1 |
| 3012 | COX8A    | 8.03720681  | Tumor_G1 |
| 3013 | SCO1     | 2.926132622 | Tumor_G1 |
| 3014 | SURF1    | 5.465207764 | Tumor_G1 |
| 3015 | ATP6V1E1 | 7.055332281 | Tumor_G1 |
| 3016 | DLAT     | 5.289196234 | Tumor_G1 |
| 3017 | PDC      | 0.102845502 | Tumor_G1 |
| 3018 | SUCLG2   | 6.321464365 | Tumor_G1 |
| 3019 | SLC25A5  | 8.037585085 | Tumor_G1 |
| 3020 | UCP2     | 8.114534772 | Tumor_G1 |
| 3021 | SOD2     | 5.761339329 | Tumor_G1 |
| 3022 | NOX4     | 2.949969813 | Tumor_G1 |
| 3023 | DUOX1    | 6.12869817  | Tumor_G1 |
| 3024 | DUOXA1   | 6.119081835 | Tumor_G1 |
| 3025 | DUOX2    | 7.233991828 | Tumor_G1 |
| 3026 | DUOXA2   | 3.79095912  | Tumor_G1 |
| 3027 | NDUFA1   | 6.985585654 | Tumor_G1 |
| 3028 | NDUFA2   | 4.786166225 | Tumor_G1 |
| 3029 | NDUFA8   | 5.657832682 | Tumor_G1 |
| 3030 | NDUFB1   | 4.760719127 | Tumor_G1 |
| 3031 | NDUFB10  | 6.040585212 | Tumor_G1 |
| 3032 | NDUFB2   | 4.144595612 | Tumor_G1 |
| 3033 | NDUFB3   | 5.095095984 | Tumor_G1 |
| 3034 | NDUFB7   | 7.235052027 | Tumor_G1 |
| 3035 | CYC1     | 4.615251546 | Tumor_G1 |
| 3036 | ETFB     | 2.82218384  | Tumor_G1 |
| 3037 | UQCR10   | 6.49667292  | Tumor_G1 |
| 3038 | UQCRQ    | 5.839557671 | Tumor_G1 |

|      |          |             |          |
|------|----------|-------------|----------|
| 3039 | UQCC3    | 2.20703681  | Tumor_G1 |
| 3040 | COX15    | 2.893186769 | Tumor_G1 |
| 3041 | COX5A    | 5.565573971 | Tumor_G1 |
| 3042 | COX6B1   | 7.830384687 | Tumor_G1 |
| 3043 | COX6C    | 4.746847361 | Tumor_G1 |
| 3044 | COX7A2   | 5.540658429 | Tumor_G1 |
| 3045 | COX7B    | 5.173894967 | Tumor_G1 |
| 3046 | COX8A    | 6.833933491 | Tumor_G1 |
| 3047 | SCO1     | 1.790579931 | Tumor_G1 |
| 3048 | SURF1    | 4.020823273 | Tumor_G1 |
| 3049 | ATP6V1E1 | 5.421202454 | Tumor_G1 |
| 3050 | DLAT     | 3.23448881  | Tumor_G1 |
| 3051 | PDC      | 0.092959604 | Tumor_G1 |
| 3052 | SUCLG2   | 4.43245174  | Tumor_G1 |
| 3053 | SLC25A5  | 6.544829106 | Tumor_G1 |
| 3054 | UCP2     | 6.33126046  | Tumor_G1 |
| 3055 | SOD2     | 3.883325484 | Tumor_G1 |
| 3056 | NOX4     | 2.51651628  | Tumor_G1 |
| 3057 | DUOX1    | 3.78697937  | Tumor_G1 |
| 3058 | DUOXA1   | 3.941302104 | Tumor_G1 |
| 3059 | DUOX2    | 3.827890951 | Tumor_G1 |
| 3060 | DUOXA2   | 1.528199666 | Tumor_G1 |
| 3061 | NDUFA1   | 7.719198605 | Tumor_G1 |
| 3062 | NDUFA2   | 6.425258348 | Tumor_G1 |
| 3063 | NDUFA8   | 6.659931081 | Tumor_G1 |
| 3064 | NDUFB1   | 5.156683186 | Tumor_G1 |
| 3065 | NDUFB10  | 7.070059055 | Tumor_G1 |
| 3066 | NDUFB2   | 6.103658178 | Tumor_G1 |
| 3067 | NDUFB3   | 6.052281816 | Tumor_G1 |
| 3068 | NDUFB7   | 8.478736062 | Tumor_G1 |
| 3069 | CYC1     | 6.403094447 | Tumor_G1 |
| 3070 | ETFB     | 4.391879278 | Tumor_G1 |
| 3071 | UQCR10   | 7.180175834 | Tumor_G1 |
| 3072 | UQCRQ    | 7.093835533 | Tumor_G1 |
| 3073 | UQCC3    | 3.974794528 | Tumor_G1 |
| 3074 | COX15    | 4.210305148 | Tumor_G1 |
| 3075 | COX5A    | 6.778099569 | Tumor_G1 |
| 3076 | COX6B1   | 8.393613492 | Tumor_G1 |
| 3077 | COX6C    | 5.963711577 | Tumor_G1 |
| 3078 | COX7A2   | 6.608918357 | Tumor_G1 |

|      |          |             |          |
|------|----------|-------------|----------|
| 3079 | COX7B    | 5.651690494 | Tumor_G1 |
| 3080 | COX8A    | 9.070994756 | Tumor_G1 |
| 3081 | SCO1     | 2.716506832 | Tumor_G1 |
| 3082 | SURF1    | 5.872791543 | Tumor_G1 |
| 3083 | ATP6V1E1 | 6.947939325 | Tumor_G1 |
| 3084 | DLAT     | 4.854472901 | Tumor_G1 |
| 3085 | PDC      | 0           | Tumor_G1 |
| 3086 | SUCLG2   | 5.560549315 | Tumor_G1 |
| 3087 | SLC25A5  | 8.052708811 | Tumor_G1 |
| 3088 | UCP2     | 7.517524903 | Tumor_G1 |
| 3089 | SOD2     | 5.550714561 | Tumor_G1 |
| 3090 | NOX4     | 3.907298129 | Tumor_G1 |
| 3091 | DUOX1    | 4.801108864 | Tumor_G1 |
| 3092 | DUOXA1   | 5.26334573  | Tumor_G1 |
| 3093 | DUOX2    | 4.005353557 | Tumor_G1 |
| 3094 | DUOXA2   | 2.47525535  | Tumor_G1 |
| 3095 | NDUFA1   | 7.734675904 | Tumor_G1 |
| 3096 | NDUFA2   | 6.523643582 | Tumor_G1 |
| 3097 | NDUFA8   | 6.722172928 | Tumor_G1 |
| 3098 | NDUFB1   | 5.458164161 | Tumor_G1 |
| 3099 | NDUFB10  | 7.289400826 | Tumor_G1 |
| 3100 | NDUFB2   | 6.115780623 | Tumor_G1 |
| 3101 | NDUFB3   | 6.281379677 | Tumor_G1 |
| 3102 | NDUFB7   | 8.214584844 | Tumor_G1 |
| 3103 | CYC1     | 6.533310224 | Tumor_G1 |
| 3104 | ETFB     | 4.170756373 | Tumor_G1 |
| 3105 | UQCR10   | 7.224879607 | Tumor_G1 |
| 3106 | UQCRQ    | 7.168895437 | Tumor_G1 |
| 3107 | UQCC3    | 3.7193176   | Tumor_G1 |
| 3108 | COX15    | 4.543725511 | Tumor_G1 |
| 3109 | COX5A    | 7.209516408 | Tumor_G1 |
| 3110 | COX6B1   | 8.572604285 | Tumor_G1 |
| 3111 | COX6C    | 6.166340592 | Tumor_G1 |
| 3112 | COX7A2   | 6.792929102 | Tumor_G1 |
| 3113 | COX7B    | 5.741960436 | Tumor_G1 |
| 3114 | COX8A    | 8.911950854 | Tumor_G1 |
| 3115 | SCO1     | 3.09687517  | Tumor_G1 |
| 3116 | SURF1    | 5.838873087 | Tumor_G1 |
| 3117 | ATP6V1E1 | 6.988953121 | Tumor_G1 |
| 3118 | DLAT     | 5.139091598 | Tumor_G1 |

|      |          |             |          |
|------|----------|-------------|----------|
| 3119 | PDC      | 0.104555577 | Tumor_G1 |
| 3120 | SUCLG2   | 6.10732094  | Tumor_G1 |
| 3121 | SLC25A5  | 8.487255271 | Tumor_G1 |
| 3122 | UCP2     | 7.350814162 | Tumor_G1 |
| 3123 | SOD2     | 5.562982557 | Tumor_G1 |
| 3124 | NOX4     | 4.027931946 | Tumor_G1 |
| 3125 | DUOX1    | 4.936841344 | Tumor_G1 |
| 3126 | DUOXA1   | 4.973373417 | Tumor_G1 |
| 3127 | DUOX2    | 3.99707236  | Tumor_G1 |
| 3128 | DUOXA2   | 1.96212542  | Tumor_G1 |
| 3129 | NDUFA1   | 7.738590945 | Tumor_G1 |
| 3130 | NDUFA2   | 6.482824855 | Tumor_G1 |
| 3131 | NDUFA8   | 6.586776611 | Tumor_G1 |
| 3132 | NDUFB1   | 5.515283492 | Tumor_G1 |
| 3133 | NDUFB10  | 7.216271947 | Tumor_G1 |
| 3134 | NDUFB2   | 6.30427451  | Tumor_G1 |
| 3135 | NDUFB3   | 6.173795608 | Tumor_G1 |
| 3136 | NDUFB7   | 8.379072659 | Tumor_G1 |
| 3137 | CYC1     | 6.529680422 | Tumor_G1 |
| 3138 | ETFB     | 4.723054442 | Tumor_G1 |
| 3139 | UQCR10   | 7.399764975 | Tumor_G1 |
| 3140 | UQCRQ    | 7.250243908 | Tumor_G1 |
| 3141 | UQCC3    | 3.911435737 | Tumor_G1 |
| 3142 | COX15    | 4.466144101 | Tumor_G1 |
| 3143 | COX5A    | 7.001620476 | Tumor_G1 |
| 3144 | COX6B1   | 8.46270324  | Tumor_G1 |
| 3145 | COX6C    | 6.126298233 | Tumor_G1 |
| 3146 | COX7A2   | 6.610412181 | Tumor_G1 |
| 3147 | COX7B    | 5.746780195 | Tumor_G1 |
| 3148 | COX8A    | 9.048871104 | Tumor_G1 |
| 3149 | SCO1     | 2.623557119 | Tumor_G1 |
| 3150 | SURF1    | 6.166387367 | Tumor_G1 |
| 3151 | ATP6V1E1 | 7.031846238 | Tumor_G1 |
| 3152 | DLAT     | 4.699546219 | Tumor_G1 |
| 3153 | PDC      | 0.113627563 | Tumor_G1 |
| 3154 | SUCLG2   | 5.908721369 | Tumor_G1 |
| 3155 | SLC25A5  | 7.741550098 | Tumor_G1 |
| 3156 | UCP2     | 7.77956426  | Tumor_G1 |
| 3157 | SOD2     | 5.199913735 | Tumor_G1 |
| 3158 | NOX4     | 2.760823291 | Tumor_G1 |

|      |          |             |          |
|------|----------|-------------|----------|
| 3159 | DUOX1    | 4.740290263 | Tumor_G1 |
| 3160 | DUOXA1   | 5.522902937 | Tumor_G1 |
| 3161 | DUOX2    | 4.386824877 | Tumor_G1 |
| 3162 | DUOXA2   | 2.618499538 | Tumor_G1 |
| 3163 | NDUFA1   | 7.599061496 | Tumor_G1 |
| 3164 | NDUFA2   | 6.368292929 | Tumor_G1 |
| 3165 | NDUFA8   | 6.638779736 | Tumor_G1 |
| 3166 | NDUFB1   | 5.223273872 | Tumor_G1 |
| 3167 | NDUFB10  | 7.194295887 | Tumor_G1 |
| 3168 | NDUFB2   | 6.023051726 | Tumor_G1 |
| 3169 | NDUFB3   | 5.941337797 | Tumor_G1 |
| 3170 | NDUFB7   | 7.990005282 | Tumor_G1 |
| 3171 | CYC1     | 6.363919312 | Tumor_G1 |
| 3172 | ETFB     | 4.563173966 | Tumor_G1 |
| 3173 | UQCR10   | 7.125790781 | Tumor_G1 |
| 3174 | UQCRQ    | 6.858910945 | Tumor_G1 |
| 3175 | UQCC3    | 3.72494791  | Tumor_G1 |
| 3176 | COX15    | 4.760135642 | Tumor_G1 |
| 3177 | COX5A    | 6.842898581 | Tumor_G1 |
| 3178 | COX6B1   | 8.226374529 | Tumor_G1 |
| 3179 | COX6C    | 6.095191856 | Tumor_G1 |
| 3180 | COX7A2   | 6.541756499 | Tumor_G1 |
| 3181 | COX7B    | 5.675427117 | Tumor_G1 |
| 3182 | COX8A    | 8.904760487 | Tumor_G1 |
| 3183 | SCO1     | 2.956957865 | Tumor_G1 |
| 3184 | SURF1    | 5.74831892  | Tumor_G1 |
| 3185 | ATP6V1E1 | 6.951904086 | Tumor_G1 |
| 3186 | DLAT     | 4.921556176 | Tumor_G1 |
| 3187 | PDC      | 0.132256719 | Tumor_G1 |
| 3188 | SUCLG2   | 6.235694811 | Tumor_G1 |
| 3189 | SLC25A5  | 7.665130965 | Tumor_G1 |
| 3190 | UCP2     | 7.276459422 | Tumor_G1 |
| 3191 | SOD2     | 5.768483512 | Tumor_G1 |
| 3192 | NOX4     | 2.691940253 | Tumor_G1 |
| 3193 | DUOX1    | 6.482277643 | Tumor_G1 |
| 3194 | DUOXA1   | 6.420256316 | Tumor_G1 |
| 3195 | DUOX2    | 6.198027077 | Tumor_G1 |
| 3196 | DUOXA2   | 3.740429997 | Tumor_G1 |
| 3197 | NDUFA1   | 7.50578643  | Tumor_G1 |
| 3198 | NDUFA2   | 6.235412819 | Tumor_G1 |



|      |          |             |          |
|------|----------|-------------|----------|
| 3199 | NDUFA8   | 6.490294956 | Tumor_G1 |
| 3200 | NDUFB1   | 5.186130041 | Tumor_G1 |
| 3201 | NDUFB10  | 7.050060532 | Tumor_G1 |
| 3202 | NDUFB2   | 5.877454317 | Tumor_G1 |
| 3203 | NDUFB3   | 5.90304778  | Tumor_G1 |
| 3204 | NDUFB7   | 7.870927842 | Tumor_G1 |
| 3205 | CYC1     | 6.308089386 | Tumor_G1 |
| 3206 | ETFB     | 4.266513252 | Tumor_G1 |
| 3207 | UQCR10   | 7.014734162 | Tumor_G1 |
| 3208 | UQCRQ    | 6.838778614 | Tumor_G1 |
| 3209 | UQCC3    | 3.437269024 | Tumor_G1 |
| 3210 | COX15    | 4.379182496 | Tumor_G1 |
| 3211 | COX5A    | 6.975990932 | Tumor_G1 |
| 3212 | COX6B1   | 8.12896759  | Tumor_G1 |
| 3213 | COX6C    | 6.033498396 | Tumor_G1 |
| 3214 | COX7A2   | 6.502268189 | Tumor_G1 |
| 3215 | COX7B    | 5.776802009 | Tumor_G1 |
| 3216 | COX8A    | 8.976083376 | Tumor_G1 |
| 3217 | SCO1     | 2.927883083 | Tumor_G1 |
| 3218 | SURF1    | 5.72211932  | Tumor_G1 |
| 3219 | ATP6V1E1 | 6.848791134 | Tumor_G1 |
| 3220 | DLAT     | 4.967914215 | Tumor_G1 |
| 3221 | PDC      | 0.102766281 | Tumor_G1 |
| 3222 | SUCLG2   | 6.003480931 | Tumor_G1 |
| 3223 | SLC25A5  | 8.153594475 | Tumor_G1 |
| 3224 | UCP2     | 7.949718015 | Tumor_G1 |
| 3225 | SOD2     | 5.848384509 | Tumor_G1 |
| 3226 | NOX4     | 3.082011673 | Tumor_G1 |
| 3227 | DUOX1    | 5.246392615 | Tumor_G1 |
| 3228 | DUOXA1   | 5.425054592 | Tumor_G1 |
| 3229 | DUOX2    | 4.306234409 | Tumor_G1 |
| 3230 | DUOXA2   | 2.334836235 | Tumor_G1 |
| 3231 | NDUFA1   | 7.647994966 | Tumor_G1 |
| 3232 | NDUFA2   | 6.64246459  | Tumor_G1 |
| 3233 | NDUFA8   | 6.64681922  | Tumor_G1 |
| 3234 | NDUFB1   | 5.306522091 | Tumor_G1 |
| 3235 | NDUFB10  | 6.966667716 | Tumor_G1 |
| 3236 | NDUFB2   | 6.027844466 | Tumor_G1 |
| 3237 | NDUFB3   | 6.071334974 | Tumor_G1 |
| 3238 | NDUFB7   | 8.288505457 | Tumor_G1 |

|      |          |             |          |
|------|----------|-------------|----------|
| 3239 | CYC1     | 6.640715278 | Tumor_G1 |
| 3240 | ETFB     | 4.251608324 | Tumor_G1 |
| 3241 | UQCR10   | 7.380317168 | Tumor_G1 |
| 3242 | UQCRQ    | 7.018607647 | Tumor_G1 |
| 3243 | UQCC3    | 3.93318258  | Tumor_G1 |
| 3244 | COX15    | 4.642760871 | Tumor_G1 |
| 3245 | COX5A    | 6.685452922 | Tumor_G1 |
| 3246 | COX6B1   | 8.214246522 | Tumor_G1 |
| 3247 | COX6C    | 5.939313129 | Tumor_G1 |
| 3248 | COX7A2   | 6.681659043 | Tumor_G1 |
| 3249 | COX7B    | 5.692943187 | Tumor_G1 |
| 3250 | COX8A    | 8.973354244 | Tumor_G1 |
| 3251 | SCO1     | 3.087122906 | Tumor_G1 |
| 3252 | SURF1    | 5.713002645 | Tumor_G1 |
| 3253 | ATP6V1E1 | 7.347859303 | Tumor_G1 |
| 3254 | DLAT     | 5.045628345 | Tumor_G1 |
| 3255 | PDC      | 0.110891433 | Tumor_G1 |
| 3256 | SUCLG2   | 6.138534233 | Tumor_G1 |
| 3257 | SLC25A5  | 8.169999667 | Tumor_G1 |
| 3258 | UCP2     | 7.837988302 | Tumor_G1 |
| 3259 | SOD2     | 5.587199682 | Tumor_G1 |
| 3260 | NOX4     | 2.780966255 | Tumor_G1 |
| 3261 | DUOX1    | 5.885721112 | Tumor_G1 |
| 3262 | DUOXA1   | 6.009292    | Tumor_G1 |
| 3263 | DUOX2    | 5.334935403 | Tumor_G1 |
| 3264 | DUOXA2   | 2.749443725 | Tumor_G1 |
| 3265 | NDUFA1   | 7.677497227 | Tumor_G1 |
| 3266 | NDUFA2   | 6.759072427 | Tumor_G1 |
| 3267 | NDUFA8   | 6.64772696  | Tumor_G1 |
| 3268 | NDUFB1   | 5.330336498 | Tumor_G1 |
| 3269 | NDUFB10  | 7.075583639 | Tumor_G1 |
| 3270 | NDUFB2   | 6.387994159 | Tumor_G1 |
| 3271 | NDUFB3   | 6.096831341 | Tumor_G1 |
| 3272 | NDUFB7   | 8.408400553 | Tumor_G1 |
| 3273 | CYC1     | 6.307849702 | Tumor_G1 |
| 3274 | ETFB     | 5.045891671 | Tumor_G1 |
| 3275 | UQCR10   | 7.365644507 | Tumor_G1 |
| 3276 | UQCRQ    | 7.053376778 | Tumor_G1 |
| 3277 | UQCC3    | 4.32580636  | Tumor_G1 |
| 3278 | COX15    | 4.283630492 | Tumor_G1 |

|      |          |             |          |
|------|----------|-------------|----------|
| 3279 | COX5A    | 6.664263208 | Tumor_G1 |
| 3280 | COX6B1   | 8.654346662 | Tumor_G1 |
| 3281 | COX6C    | 6.104987803 | Tumor_G1 |
| 3282 | COX7A2   | 6.516834058 | Tumor_G1 |
| 3283 | COX7B    | 5.799446353 | Tumor_G1 |
| 3284 | COX8A    | 9.184962714 | Tumor_G1 |
| 3285 | SCO1     | 2.893742912 | Tumor_G1 |
| 3286 | SURF1    | 6.222204326 | Tumor_G1 |
| 3287 | ATP6V1E1 | 6.956079321 | Tumor_G1 |
| 3288 | DLAT     | 4.693533354 | Tumor_G1 |
| 3289 | PDC      | 0.098288418 | Tumor_G1 |
| 3290 | SUCLG2   | 5.495074923 | Tumor_G1 |
| 3291 | SLC25A5  | 7.83254227  | Tumor_G1 |
| 3292 | UCP2     | 8.452844373 | Tumor_G1 |
| 3293 | SOD2     | 4.524084273 | Tumor_G1 |
| 3294 | NOX4     | 3.116589164 | Tumor_G1 |
| 3295 | DUOX1    | 6.032337811 | Tumor_G1 |
| 3296 | DUOXA1   | 6.566147752 | Tumor_G1 |
| 3297 | DUOX2    | 5.756418744 | Tumor_G1 |
| 3298 | DUOXA2   | 3.905970418 | Tumor_G1 |
| 3299 | NDUFA1   | 7.851069874 | Tumor_G1 |
| 3300 | NDUFA2   | 6.777065398 | Tumor_G1 |
| 3301 | NDUFA8   | 6.81235384  | Tumor_G1 |
| 3302 | NDUFB1   | 5.423689421 | Tumor_G1 |
| 3303 | NDUFB10  | 7.282025264 | Tumor_G1 |
| 3304 | NDUFB2   | 6.609995508 | Tumor_G1 |
| 3305 | NDUFB3   | 6.370218033 | Tumor_G1 |
| 3306 | NDUFB7   | 8.299685474 | Tumor_G1 |
| 3307 | CYC1     | 6.610097503 | Tumor_G1 |
| 3308 | ETFB     | 4.530197975 | Tumor_G1 |
| 3309 | UQCR10   | 7.429170536 | Tumor_G1 |
| 3310 | UQCRQ    | 7.147762291 | Tumor_G1 |
| 3311 | UQCC3    | 3.920199694 | Tumor_G1 |
| 3312 | COX15    | 4.385085333 | Tumor_G1 |
| 3313 | COX5A    | 7.440643568 | Tumor_G1 |
| 3314 | COX6B1   | 8.599027411 | Tumor_G1 |
| 3315 | COX6C    | 6.261641019 | Tumor_G1 |
| 3316 | COX7A2   | 6.751127885 | Tumor_G1 |
| 3317 | COX7B    | 6.056422804 | Tumor_G1 |
| 3318 | COX8A    | 9.182497844 | Tumor_G1 |

|      |          |             |          |
|------|----------|-------------|----------|
| 3319 | SCO1     | 2.962177366 | Tumor_G1 |
| 3320 | SURF1    | 5.6858426   | Tumor_G1 |
| 3321 | ATP6V1E1 | 7.437250087 | Tumor_G1 |
| 3322 | DLAT     | 5.315244373 | Tumor_G1 |
| 3323 | PDC      | 0.12117104  | Tumor_G1 |
| 3324 | SUCLG2   | 6.095762572 | Tumor_G1 |
| 3325 | SLC25A5  | 8.288298245 | Tumor_G1 |
| 3326 | UCP2     | 8.368190133 | Tumor_G1 |
| 3327 | SOD2     | 6.542378605 | Tumor_G1 |
| 3328 | NOX4     | 2.207306959 | Tumor_G1 |
| 3329 | DUOX1    | 5.253185318 | Tumor_G1 |
| 3330 | DUOXA1   | 5.540677327 | Tumor_G1 |
| 3331 | DUOX2    | 5.267083056 | Tumor_G1 |
| 3332 | DUOXA2   | 3.661332127 | Tumor_G1 |
| 3333 | NDUFA1   | 7.472441927 | Tumor_G1 |
| 3334 | NDUFA2   | 7.352159525 | Tumor_G1 |
| 3335 | NDUFA8   | 5.991223336 | Tumor_G1 |
| 3336 | NDUFB1   | 5.333824837 | Tumor_G1 |
| 3337 | NDUFB10  | 7.927383578 | Tumor_G1 |
| 3338 | NDUFB2   | 6.515306864 | Tumor_G1 |
| 3339 | NDUFB3   | 6.367028817 | Tumor_G1 |
| 3340 | NDUFB7   | 8.514542428 | Tumor_G1 |
| 3341 | CYC1     | 7.601779994 | Tumor_G1 |
| 3342 | ETFB     | 4.413275899 | Tumor_G1 |
| 3343 | UQCR10   | 6.768538899 | Tumor_G1 |
| 3344 | UQCRQ    | 8.334318223 | Tumor_G1 |
| 3345 | UQCC3    | 4.594566923 | Tumor_G1 |
| 3346 | COX15    | 4.844666194 | Tumor_G1 |
| 3347 | COX5A    | 6.718051462 | Tumor_G1 |
| 3348 | COX6B1   | 8.432321447 | Tumor_G1 |
| 3349 | COX6C    | 6.364206996 | Tumor_G1 |
| 3350 | COX7A2   | 6.769388843 | Tumor_G1 |
| 3351 | COX7B    | 5.508106755 | Tumor_G1 |
| 3352 | COX8A    | 9.2305699   | Tumor_G1 |
| 3353 | SCO1     | 3.714696196 | Tumor_G1 |
| 3354 | SURF1    | 5.825063999 | Tumor_G1 |
| 3355 | ATP6V1E1 | 6.787530288 | Tumor_G1 |
| 3356 | DLAT     | 4.904730951 | Tumor_G1 |
| 3357 | PDC      | 0.301178339 | Tumor_G1 |
| 3358 | SUCLG2   | 6.23024195  | Tumor_G1 |

|      |          |             |          |
|------|----------|-------------|----------|
| 3359 | SLC25A5  | 8.260048784 | Tumor_G1 |
| 3360 | UCP2     | 7.183220531 | Tumor_G1 |
| 3361 | SOD2     | 5.163165366 | Tumor_G1 |
| 3362 | NOX4     | 3.364236902 | Tumor_G1 |
| 3363 | DUOX1    | 5.146527198 | Tumor_G1 |
| 3364 | DUOXA1   | 5.029512775 | Tumor_G1 |
| 3365 | DUOX2    | 4.049847428 | Tumor_G1 |
| 3366 | DUOXA2   | 2.557953261 | Tumor_G1 |
| 3367 | NDUFA1   | 7.582845335 | Tumor_G1 |
| 3368 | NDUFA2   | 6.571062256 | Tumor_G1 |
| 3369 | NDUFA8   | 6.153883639 | Tumor_G1 |
| 3370 | NDUFB1   | 5.142460511 | Tumor_G1 |
| 3371 | NDUFB10  | 6.704699952 | Tumor_G1 |
| 3372 | NDUFB2   | 6.304982656 | Tumor_G1 |
| 3373 | NDUFB3   | 6.06408641  | Tumor_G1 |
| 3374 | NDUFB7   | 7.936356299 | Tumor_G1 |
| 3375 | CYC1     | 6.395685571 | Tumor_G1 |
| 3376 | ETFB     | 3.954494129 | Tumor_G1 |
| 3377 | UQCR10   | 7.155298137 | Tumor_G1 |
| 3378 | UQCRQ    | 6.838200455 | Tumor_G1 |
| 3379 | UQCC3    | 3.786601185 | Tumor_G1 |
| 3380 | COX15    | 4.225792774 | Tumor_G1 |
| 3381 | COX5A    | 6.917262228 | Tumor_G1 |
| 3382 | COX6B1   | 8.116134994 | Tumor_G1 |
| 3383 | COX6C    | 5.780294404 | Tumor_G1 |
| 3384 | COX7A2   | 6.478307448 | Tumor_G1 |
| 3385 | COX7B    | 5.581862214 | Tumor_G1 |
| 3386 | COX8A    | 9.06873352  | Tumor_G1 |
| 3387 | SCO1     | 2.975086066 | Tumor_G1 |
| 3388 | SURF1    | 5.713534405 | Tumor_G1 |
| 3389 | ATP6V1E1 | 6.942287459 | Tumor_G1 |
| 3390 | DLAT     | 4.859796208 | Tumor_G1 |
| 3391 | PDC      | 0.081386087 | Tumor_G1 |
| 3392 | SUCLG2   | 6.20242321  | Tumor_G1 |
| 3393 | SLC25A5  | 8.196920178 | Tumor_G1 |
| 3394 | UCP2     | 7.571128919 | Tumor_G1 |
| 3395 | SOD2     | 5.767993859 | Tumor_G1 |
| 3396 | NOX4     | 1.209748593 | Tumor_G1 |
| 3397 | DUOX1    | 5.206031721 | Tumor_G1 |
| 3398 | DUOXA1   | 5.369345789 | Tumor_G1 |

|      |          |             |          |
|------|----------|-------------|----------|
| 3399 | DUOX2    | 5.628956364 | Tumor_G1 |
| 3400 | DUOXA2   | 3.222910101 | Tumor_G1 |
| 3401 | NDUFA1   | 8.210089681 | Tumor_G1 |
| 3402 | NDUFA2   | 7.195604253 | Tumor_G1 |
| 3403 | NDUFA8   | 6.272747286 | Tumor_G1 |
| 3404 | NDUFB1   | 5.712654832 | Tumor_G1 |
| 3405 | NDUFB10  | 7.826356595 | Tumor_G1 |
| 3406 | NDUFB2   | 6.566862831 | Tumor_G1 |
| 3407 | NDUFB3   | 6.454474539 | Tumor_G1 |
| 3408 | NDUFB7   | 8.953512012 | Tumor_G1 |
| 3409 | CYC1     | 6.972902427 | Tumor_G1 |
| 3410 | ETFB     | 4.796274705 | Tumor_G1 |
| 3411 | UQCR10   | 7.726126462 | Tumor_G1 |
| 3412 | UQCRQ    | 7.682287832 | Tumor_G1 |
| 3413 | UQCC3    | 4.522050823 | Tumor_G1 |
| 3414 | COX15    | 3.845228326 | Tumor_G1 |
| 3415 | COX5A    | 7.499845356 | Tumor_G1 |
| 3416 | COX6B1   | 9.136476791 | Tumor_G1 |
| 3417 | COX6C    | 6.419509561 | Tumor_G1 |
| 3418 | COX7A2   | 7.140101947 | Tumor_G1 |
| 3419 | COX7B    | 6.190822033 | Tumor_G1 |
| 3420 | COX8A    | 9.608566629 | Tumor_G1 |
| 3421 | SCO1     | 2.831996314 | Tumor_G1 |
| 3422 | SURF1    | 5.700671998 | Tumor_G1 |
| 3423 | ATP6V1E1 | 7.251491208 | Tumor_G1 |
| 3424 | DLAT     | 4.535853317 | Tumor_G1 |
| 3425 | PDC      | 0.077040826 | Tumor_G1 |
| 3426 | SUCLG2   | 6.022340429 | Tumor_G1 |
| 3427 | SLC25A5  | 7.806786768 | Tumor_G1 |
| 3428 | UCP2     | 8.335353258 | Tumor_G1 |
| 3429 | SOD2     | 5.695681097 | Tumor_G1 |
| 3430 | NOX4     | 2.557196011 | Tumor_G1 |
| 3431 | DUOX1    | 4.801699346 | Tumor_G1 |
| 3432 | DUOXA1   | 5.072428295 | Tumor_G1 |
| 3433 | DUOX2    | 4.516455361 | Tumor_G1 |
| 3434 | DUOXA2   | 3.225598684 | Tumor_G1 |
| 3435 | NDUFA1   | 7.955995763 | Tumor_G1 |
| 3436 | NDUFA2   | 6.710528592 | Tumor_G1 |
| 3437 | NDUFA8   | 6.9342347   | Tumor_G1 |
| 3438 | NDUFB1   | 5.821109271 | Tumor_G1 |

|      |          |             |          |
|------|----------|-------------|----------|
| 3439 | NDUFB10  | 7.452406825 | Tumor_G1 |
| 3440 | NDUFB2   | 6.438081322 | Tumor_G1 |
| 3441 | NDUFB3   | 6.016145135 | Tumor_G1 |
| 3442 | NDUFB7   | 8.335764766 | Tumor_G1 |
| 3443 | CYC1     | 6.377599014 | Tumor_G1 |
| 3444 | ETFB     | 4.878119609 | Tumor_G1 |
| 3445 | UQCR10   | 7.390880596 | Tumor_G1 |
| 3446 | UQCRQ    | 7.163370079 | Tumor_G1 |
| 3447 | UQCC3    | 4.309090002 | Tumor_G1 |
| 3448 | COX15    | 4.629548143 | Tumor_G1 |
| 3449 | COX5A    | 7.07399986  | Tumor_G1 |
| 3450 | COX6B1   | 8.604591327 | Tumor_G1 |
| 3451 | COX6C    | 6.399868808 | Tumor_G1 |
| 3452 | COX7A2   | 6.727489941 | Tumor_G1 |
| 3453 | COX7B    | 5.865964304 | Tumor_G1 |
| 3454 | COX8A    | 9.182726046 | Tumor_G1 |
| 3455 | SCO1     | 3.033715099 | Tumor_G1 |
| 3456 | SURF1    | 6.293925279 | Tumor_G1 |
| 3457 | ATP6V1E1 | 6.863378789 | Tumor_G1 |
| 3458 | DLAT     | 4.787329559 | Tumor_G1 |
| 3459 | PDC      | 0.478076579 | Tumor_G1 |
| 3460 | SUCLG2   | 5.39160477  | Tumor_G1 |
| 3461 | SLC25A5  | 7.487109121 | Tumor_G1 |
| 3462 | UCP2     | 8.982515504 | Tumor_G1 |
| 3463 | SOD2     | 4.233365859 | Tumor_G1 |
| 3464 | NOX4     | 1.437602493 | Tumor_G1 |
| 3465 | DUOX1    | 6.022200045 | Tumor_G1 |
| 3466 | DUOXA1   | 6.523435305 | Tumor_G1 |
| 3467 | DUOX2    | 6.49853057  | Tumor_G1 |
| 3468 | DUOXA2   | 5.000929619 | Tumor_G1 |
| 3469 | NDUFA1   | 7.480426309 | Tumor_G1 |
| 3470 | NDUFA2   | 6.551231532 | Tumor_G1 |
| 3471 | NDUFA8   | 6.960261519 | Tumor_G1 |
| 3472 | NDUFB1   | 5.168284096 | Tumor_G1 |
| 3473 | NDUFB10  | 7.501979281 | Tumor_G1 |
| 3474 | NDUFB2   | 6.671784119 | Tumor_G1 |
| 3475 | NDUFB3   | 5.940761276 | Tumor_G1 |
| 3476 | NDUFB7   | 8.326139179 | Tumor_G1 |
| 3477 | CYC1     | 7.132566075 | Tumor_G1 |
| 3478 | ETFB     | 4.68944769  | Tumor_G1 |

|      |          |             |          |
|------|----------|-------------|----------|
| 3479 | UQCR10   | 7.178944209 | Tumor_G1 |
| 3480 | UQCRQ    | 7.013086378 | Tumor_G1 |
| 3481 | UQCC3    | 4.183949827 | Tumor_G1 |
| 3482 | COX15    | 4.573338187 | Tumor_G1 |
| 3483 | COX5A    | 7.390944473 | Tumor_G1 |
| 3484 | COX6B1   | 8.603118125 | Tumor_G1 |
| 3485 | COX6C    | 5.970570344 | Tumor_G1 |
| 3486 | COX7A2   | 6.848208343 | Tumor_G1 |
| 3487 | COX7B    | 6.019955032 | Tumor_G1 |
| 3488 | COX8A    | 9.634659707 | Tumor_G1 |
| 3489 | SCO1     | 3.330021091 | Tumor_G1 |
| 3490 | SURF1    | 6.081807915 | Tumor_G1 |
| 3491 | ATP6V1E1 | 7.161075691 | Tumor_G1 |
| 3492 | DLAT     | 5.406350987 | Tumor_G1 |
| 3493 | PDC      | 0           | Tumor_G1 |
| 3494 | SUCLG2   | 6.214165939 | Tumor_G1 |
| 3495 | SLC25A5  | 9.033013886 | Tumor_G1 |
| 3496 | UCP2     | 7.921203332 | Tumor_G1 |
| 3497 | SOD2     | 4.84646303  | Tumor_G1 |
| 3498 | NOX4     | 1.75988594  | Tumor_G1 |
| 3499 | DUOX1    | 5.374244105 | Tumor_G1 |
| 3500 | DUOXA1   | 5.515255398 | Tumor_G1 |
| 3501 | DUOX2    | 5.486748909 | Tumor_G1 |
| 3502 | DUOXA2   | 3.346727697 | Tumor_G1 |
| 3503 | NDUFA1   | 6.819415076 | Tumor_G1 |
| 3504 | NDUFA2   | 6.098989961 | Tumor_G1 |
| 3505 | NDUFA8   | 5.897283523 | Tumor_G1 |
| 3506 | NDUFB1   | 4.688882141 | Tumor_G1 |
| 3507 | NDUFB10  | 6.604306415 | Tumor_G1 |
| 3508 | NDUFB2   | 5.339941561 | Tumor_G1 |
| 3509 | NDUFB3   | 5.488049378 | Tumor_G1 |
| 3510 | NDUFB7   | 7.623936992 | Tumor_G1 |
| 3511 | CYC1     | 6.030103482 | Tumor_G1 |
| 3512 | ETFB     | 3.739323122 | Tumor_G1 |
| 3513 | UQCR10   | 6.510591648 | Tumor_G1 |
| 3514 | UQCRQ    | 6.481816341 | Tumor_G1 |
| 3515 | UQCC3    | 3.397830954 | Tumor_G1 |
| 3516 | COX15    | 3.792308555 | Tumor_G1 |
| 3517 | COX5A    | 6.275812506 | Tumor_G1 |
| 3518 | COX6B1   | 7.678706386 | Tumor_G1 |



|      |          |             |          |
|------|----------|-------------|----------|
| 3519 | COX6C    | 4.919871128 | Tumor_G1 |
| 3520 | COX7A2   | 5.887497206 | Tumor_G1 |
| 3521 | COX7B    | 5.142648769 | Tumor_G1 |
| 3522 | COX8A    | 8.436466244 | Tumor_G1 |
| 3523 | SCO1     | 2.50285839  | Tumor_G1 |
| 3524 | SURF1    | 5.561339321 | Tumor_G1 |
| 3525 | ATP6V1E1 | 6.491029312 | Tumor_G1 |
| 3526 | DLAT     | 4.312456943 | Tumor_G1 |
| 3527 | PDC      | 0.12147023  | Tumor_G1 |
| 3528 | SUCLG2   | 5.397410888 | Tumor_G1 |
| 3529 | SLC25A5  | 7.501722329 | Tumor_G1 |
| 3530 | UCP2     | 7.357285894 | Tumor_G1 |
| 3531 | SOD2     | 6.261907591 | Tumor_G1 |
| 3532 | NOX4     | 1.798835775 | Tumor_G1 |
| 3533 | DUOX1    | 5.084935431 | Tumor_G1 |
| 3534 | DUOXA1   | 5.034227874 | Tumor_G1 |
| 3535 | DUOX2    | 4.299727752 | Tumor_G1 |
| 3536 | DUOXA2   | 2.680624262 | Tumor_G1 |
| 3537 | NDUFA1   | 7.249436346 | Tumor_G1 |
| 3538 | NDUFA2   | 6.209156863 | Tumor_G1 |
| 3539 | NDUFA8   | 6.230571155 | Tumor_G1 |
| 3540 | NDUFB1   | 5.066212242 | Tumor_G1 |
| 3541 | NDUFB10  | 6.806317671 | Tumor_G1 |
| 3542 | NDUFB2   | 5.870253745 | Tumor_G1 |
| 3543 | NDUFB3   | 5.237796433 | Tumor_G1 |
| 3544 | NDUFB7   | 8.012589216 | Tumor_G1 |
| 3545 | CYC1     | 5.866672755 | Tumor_G1 |
| 3546 | ETFB     | 4.022590228 | Tumor_G1 |
| 3547 | UQCR10   | 6.884617386 | Tumor_G1 |
| 3548 | UQCRQ    | 6.705959238 | Tumor_G1 |
| 3549 | UQCC3    | 3.704003652 | Tumor_G1 |
| 3550 | COX15    | 3.368467671 | Tumor_G1 |
| 3551 | COX5A    | 6.323318666 | Tumor_G1 |
| 3552 | COX6B1   | 8.161589124 | Tumor_G1 |
| 3553 | COX6C    | 5.846999906 | Tumor_G1 |
| 3554 | COX7A2   | 5.941404142 | Tumor_G1 |
| 3555 | COX7B    | 5.256799385 | Tumor_G1 |
| 3556 | COX8A    | 8.268144399 | Tumor_G1 |
| 3557 | SCO1     | 1.905753704 | Tumor_G1 |
| 3558 | SURF1    | 5.232316765 | Tumor_G1 |

|      |          |             |          |
|------|----------|-------------|----------|
| 3559 | ATP6V1E1 | 5.941167953 | Tumor_G1 |
| 3560 | DLAT     | 3.564293213 | Tumor_G1 |
| 3561 | PDC      | 0           | Tumor_G1 |
| 3562 | SUCLG2   | 4.893150795 | Tumor_G1 |
| 3563 | SLC25A5  | 6.329919403 | Tumor_G1 |
| 3564 | UCP2     | 7.690229487 | Tumor_G1 |
| 3565 | SOD2     | 3.485872323 | Tumor_G1 |
| 3566 | NOX4     | 1.376717403 | Tumor_G1 |
| 3567 | DUOX1    | 4.570346314 | Tumor_G1 |
| 3568 | DUOXA1   | 4.850643456 | Tumor_G1 |
| 3569 | DUOX2    | 4.038334991 | Tumor_G1 |
| 3570 | DUOXA2   | 2.869884336 | Tumor_G1 |
| 3571 | NDUFA1   | 7.524976507 | Tumor_G1 |
| 3572 | NDUFA2   | 6.512694997 | Tumor_G1 |
| 3573 | NDUFA8   | 6.532831856 | Tumor_G1 |
| 3574 | NDUFB1   | 5.008120316 | Tumor_G1 |
| 3575 | NDUFB10  | 7.299805401 | Tumor_G1 |
| 3576 | NDUFB2   | 6.110235968 | Tumor_G1 |
| 3577 | NDUFB3   | 5.836364484 | Tumor_G1 |
| 3578 | NDUFB7   | 8.17287174  | Tumor_G1 |
| 3579 | CYC1     | 6.490022914 | Tumor_G1 |
| 3580 | ETFB     | 4.294234416 | Tumor_G1 |
| 3581 | UQCR10   | 7.229086186 | Tumor_G1 |
| 3582 | UQCRQ    | 6.918108315 | Tumor_G1 |
| 3583 | UQCC3    | 3.946319136 | Tumor_G1 |
| 3584 | COX15    | 4.756641116 | Tumor_G1 |
| 3585 | COX5A    | 6.828282735 | Tumor_G1 |
| 3586 | COX6B1   | 8.293272919 | Tumor_G1 |
| 3587 | COX6C    | 5.90370324  | Tumor_G1 |
| 3588 | COX7A2   | 6.46652055  | Tumor_G1 |
| 3589 | COX7B    | 5.456123513 | Tumor_G1 |
| 3590 | COX8A    | 9.27433892  | Tumor_G1 |
| 3591 | SCO1     | 2.962625773 | Tumor_G1 |
| 3592 | SURF1    | 5.726843401 | Tumor_G1 |
| 3593 | ATP6V1E1 | 7.149339982 | Tumor_G1 |
| 3594 | DLAT     | 5.237314944 | Tumor_G1 |
| 3595 | PDC      | 0.050275374 | Tumor_G1 |
| 3596 | SUCLG2   | 6.590486003 | Tumor_G1 |
| 3597 | SLC25A5  | 8.303831861 | Tumor_G1 |
| 3598 | UCP2     | 7.901095399 | Tumor_G1 |

|      |          |             |          |
|------|----------|-------------|----------|
| 3599 | SOD2     | 6.200474612 | Tumor_G1 |
| 3600 | NOX4     | 2.854303379 | Tumor_G1 |
| 3601 | DUOX1    | 5.63205113  | Tumor_G1 |
| 3602 | DUOXA1   | 5.584945303 | Tumor_G1 |
| 3603 | DUOX2    | 4.849115302 | Tumor_G1 |
| 3604 | DUOXA2   | 2.439605014 | Tumor_G1 |
| 3605 | NDUFA1   | 7.139189535 | Tumor_G1 |
| 3606 | NDUFA2   | 6.038845901 | Tumor_G1 |
| 3607 | NDUFA8   | 6.375028359 | Tumor_G1 |
| 3608 | NDUFB1   | 4.691861166 | Tumor_G1 |
| 3609 | NDUFB10  | 7.044040003 | Tumor_G1 |
| 3610 | NDUFB2   | 5.946045049 | Tumor_G1 |
| 3611 | NDUFB3   | 5.339500877 | Tumor_G1 |
| 3612 | NDUFB7   | 7.821303755 | Tumor_G1 |
| 3613 | CYC1     | 6.617742483 | Tumor_G1 |
| 3614 | ETFB     | 4.437662762 | Tumor_G1 |
| 3615 | UQCR10   | 6.844135075 | Tumor_G1 |
| 3616 | UQCRQ    | 6.303561972 | Tumor_G1 |
| 3617 | UQCC3    | 3.71850422  | Tumor_G1 |
| 3618 | COX15    | 4.850893564 | Tumor_G1 |
| 3619 | COX5A    | 6.4812789   | Tumor_G1 |
| 3620 | COX6B1   | 7.952056376 | Tumor_G1 |
| 3621 | COX6C    | 5.737774171 | Tumor_G1 |
| 3622 | COX7A2   | 5.884119943 | Tumor_G1 |
| 3623 | COX7B    | 5.3152692   | Tumor_G1 |
| 3624 | COX8A    | 8.978111357 | Tumor_G1 |
| 3625 | SCO1     | 3.004510708 | Tumor_G1 |
| 3626 | SURF1    | 5.599048716 | Tumor_G1 |
| 3627 | ATP6V1E1 | 6.697528511 | Tumor_G1 |
| 3628 | DLAT     | 4.842795623 | Tumor_G1 |
| 3629 | PDC      | 0.159376486 | Tumor_G1 |
| 3630 | SUCLG2   | 6.200292811 | Tumor_G1 |
| 3631 | SLC25A5  | 7.619542917 | Tumor_G1 |
| 3632 | UCP2     | 7.866232231 | Tumor_G1 |
| 3633 | SOD2     | 5.176994815 | Tumor_G1 |
| 3634 | NOX4     | 1.036967394 | Tumor_G1 |
| 3635 | DUOX1    | 6.211908438 | Tumor_G1 |
| 3636 | DUOXA1   | 6.030600861 | Tumor_G1 |
| 3637 | DUOX2    | 6.131411893 | Tumor_G1 |
| 3638 | DUOXA2   | 3.473035873 | Tumor_G1 |

|      |          |             |          |
|------|----------|-------------|----------|
| 3639 | NDUFA1   | 7.282077341 | Tumor_G1 |
| 3640 | NDUFA2   | 6.103866158 | Tumor_G1 |
| 3641 | NDUFA8   | 6.384106333 | Tumor_G1 |
| 3642 | NDUFB1   | 5.080787872 | Tumor_G1 |
| 3643 | NDUFB10  | 6.822743205 | Tumor_G1 |
| 3644 | NDUFB2   | 5.949142916 | Tumor_G1 |
| 3645 | NDUFB3   | 5.858906896 | Tumor_G1 |
| 3646 | NDUFB7   | 7.868357099 | Tumor_G1 |
| 3647 | CYC1     | 6.245664015 | Tumor_G1 |
| 3648 | ETFB     | 4.270502012 | Tumor_G1 |
| 3649 | UQCR10   | 6.945168162 | Tumor_G1 |
| 3650 | UQCRQ    | 6.670976908 | Tumor_G1 |
| 3651 | UQCC3    | 3.60089871  | Tumor_G1 |
| 3652 | COX15    | 4.259763623 | Tumor_G1 |
| 3653 | COX5A    | 6.576765731 | Tumor_G1 |
| 3654 | COX6B1   | 8.020882463 | Tumor_G1 |
| 3655 | COX6C    | 5.749406106 | Tumor_G1 |
| 3656 | COX7A2   | 6.174036239 | Tumor_G1 |
| 3657 | COX7B    | 5.301861634 | Tumor_G1 |
| 3658 | COX8A    | 8.710892837 | Tumor_G1 |
| 3659 | SCO1     | 2.952034265 | Tumor_G1 |
| 3660 | SURF1    | 5.801145834 | Tumor_G1 |
| 3661 | ATP6V1E1 | 6.755830834 | Tumor_G1 |
| 3662 | DLAT     | 4.584098631 | Tumor_G1 |
| 3663 | PDC      | 0.088002364 | Tumor_G1 |
| 3664 | SUCLG2   | 5.612212447 | Tumor_G1 |
| 3665 | SLC25A5  | 7.872141726 | Tumor_G1 |
| 3666 | UCP2     | 7.85934995  | Tumor_G1 |
| 3667 | SOD2     | 4.834322402 | Tumor_G1 |
| 3668 | NOX4     | 2.445888116 | Tumor_G1 |
| 3669 | DUOX1    | 5.592710963 | Tumor_G1 |
| 3670 | DUOXA1   | 5.739903712 | Tumor_G1 |
| 3671 | DUOX2    | 5.468265915 | Tumor_G1 |
| 3672 | DUOXA2   | 2.811068981 | Tumor_G1 |
| 3673 | NDUFA1   | 8.016191681 | Tumor_G1 |
| 3674 | NDUFA2   | 6.680450055 | Tumor_G1 |
| 3675 | NDUFA8   | 6.838338822 | Tumor_G1 |
| 3676 | NDUFB1   | 5.457785742 | Tumor_G1 |
| 3677 | NDUFB10  | 7.513556528 | Tumor_G1 |
| 3678 | NDUFB2   | 5.973638338 | Tumor_G1 |

|      |          |             |          |
|------|----------|-------------|----------|
| 3679 | NDUFB3   | 5.844746622 | Tumor_G1 |
| 3680 | NDUFB7   | 8.64686387  | Tumor_G1 |
| 3681 | CYC1     | 6.705859297 | Tumor_G1 |
| 3682 | ETFB     | 4.713371333 | Tumor_G1 |
| 3683 | UQCR10   | 6.884725166 | Tumor_G1 |
| 3684 | UQCRQ    | 7.303451028 | Tumor_G1 |
| 3685 | UQCC3    | 4.36603136  | Tumor_G1 |
| 3686 | COX15    | 4.102962704 | Tumor_G1 |
| 3687 | COX5A    | 6.912672088 | Tumor_G1 |
| 3688 | COX6B1   | 8.426607445 | Tumor_G1 |
| 3689 | COX6C    | 6.118249401 | Tumor_G1 |
| 3690 | COX7A2   | 6.764615886 | Tumor_G1 |
| 3691 | COX7B    | 5.869584314 | Tumor_G1 |
| 3692 | COX8A    | 9.179711877 | Tumor_G1 |
| 3693 | SCO1     | 2.827830501 | Tumor_G1 |
| 3694 | SURF1    | 6.28611655  | Tumor_G1 |
| 3695 | ATP6V1E1 | 5.833219171 | Tumor_G1 |
| 3696 | DLAT     | 4.136742788 | Tumor_G1 |
| 3697 | PDC      | 0.061563953 | Tumor_G1 |
| 3698 | SUCLG2   | 5.075558089 | Tumor_G1 |
| 3699 | SLC25A5  | 7.583245638 | Tumor_G1 |
| 3700 | UCP2     | 8.076587047 | Tumor_G1 |
| 3701 | SOD2     | 5.056164978 | Tumor_G1 |
| 3702 | NOX4     | 1.7006057   | Tumor_G1 |
| 3703 | DUOX1    | 6.364507556 | Tumor_G1 |
| 3704 | DUOXA1   | 6.716571293 | Tumor_G1 |
| 3705 | DUOX2    | 7.08499323  | Tumor_G1 |
| 3706 | DUOXA2   | 5.503494568 | Tumor_G1 |
| 3707 | NDUFA1   | 8.225560785 | Tumor_G1 |
| 3708 | NDUFA2   | 6.553463373 | Tumor_G1 |
| 3709 | NDUFA8   | 7.347047472 | Tumor_G1 |
| 3710 | NDUFB1   | 5.73070217  | Tumor_G1 |
| 3711 | NDUFB10  | 7.249631741 | Tumor_G1 |
| 3712 | NDUFB2   | 6.068657505 | Tumor_G1 |
| 3713 | NDUFB3   | 6.687815422 | Tumor_G1 |
| 3714 | NDUFB7   | 8.118539108 | Tumor_G1 |
| 3715 | CYC1     | 7.19631629  | Tumor_G1 |
| 3716 | ETFB     | 4.839844394 | Tumor_G1 |
| 3717 | UQCR10   | 7.713951649 | Tumor_G1 |
| 3718 | UQCRQ    | 6.901237249 | Tumor_G1 |

|      |          |             |          |
|------|----------|-------------|----------|
| 3719 | UQCC3    | 3.862981338 | Tumor_G1 |
| 3720 | COX15    | 5.378065498 | Tumor_G1 |
| 3721 | COX5A    | 7.28256841  | Tumor_G1 |
| 3722 | COX6B1   | 8.443326031 | Tumor_G1 |
| 3723 | COX6C    | 6.527853473 | Tumor_G1 |
| 3724 | COX7A2   | 6.790197777 | Tumor_G1 |
| 3725 | COX7B    | 6.296307206 | Tumor_G1 |
| 3726 | COX8A    | 9.558534918 | Tumor_G1 |
| 3727 | SCO1     | 3.518677575 | Tumor_G1 |
| 3728 | SURF1    | 6.627047236 | Tumor_G1 |
| 3729 | ATP6V1E1 | 6.694782854 | Tumor_G1 |
| 3730 | DLAT     | 5.416469835 | Tumor_G1 |
| 3731 | PDC      | 0.17872959  | Tumor_G1 |
| 3732 | SUCLG2   | 6.169171129 | Tumor_G1 |
| 3733 | SLC25A5  | 8.325690301 | Tumor_G1 |
| 3734 | UCP2     | 7.680641309 | Tumor_G1 |
| 3735 | SOD2     | 6.701726693 | Tumor_G1 |
| 3736 | NOX4     | 1.286173992 | Tumor_G1 |
| 3737 | DUOX1    | 5.83773057  | Tumor_G1 |
| 3738 | DUOXA1   | 5.005289005 | Tumor_G1 |
| 3739 | DUOX2    | 4.95593108  | Tumor_G1 |
| 3740 | DUOXA2   | 2.879968397 | Tumor_G1 |
| 3741 | NDUFA1   | 7.590760933 | Tumor_G1 |
| 3742 | NDUFA2   | 5.423405712 | Tumor_G1 |
| 3743 | NDUFA8   | 6.26046956  | Tumor_G1 |
| 3744 | NDUFB1   | 5.220499492 | Tumor_G1 |
| 3745 | NDUFB10  | 6.38761807  | Tumor_G1 |
| 3746 | NDUFB2   | 4.798411119 | Tumor_G1 |
| 3747 | NDUFB3   | 5.896131525 | Tumor_G1 |
| 3748 | NDUFB7   | 7.44103612  | Tumor_G1 |
| 3749 | CYC1     | 5.599053189 | Tumor_G1 |
| 3750 | ETFB     | 3.567998766 | Tumor_G1 |
| 3751 | UQCR10   | 7.076056265 | Tumor_G1 |
| 3752 | UQCRQ    | 6.451992839 | Tumor_G1 |
| 3753 | UQCC3    | 2.618542402 | Tumor_G1 |
| 3754 | COX15    | 4.169588057 | Tumor_G1 |
| 3755 | COX5A    | 6.590537729 | Tumor_G1 |
| 3756 | COX6B1   | 8.408029308 | Tumor_G1 |
| 3757 | COX6C    | 5.438510373 | Tumor_G1 |
| 3758 | COX7A2   | 6.367471897 | Tumor_G1 |

|      |          |             |          |
|------|----------|-------------|----------|
| 3759 | COX7B    | 5.927797076 | Tumor_G1 |
| 3760 | COX8A    | 7.726753117 | Tumor_G1 |
| 3761 | SCO1     | 2.784903722 | Tumor_G1 |
| 3762 | SURF1    | 5.318122713 | Tumor_G1 |
| 3763 | ATP6V1E1 | 6.597996745 | Tumor_G1 |
| 3764 | DLAT     | 4.513636616 | Tumor_G1 |
| 3765 | PDC      | 0.163961428 | Tumor_G1 |
| 3766 | SUCLG2   | 5.60458294  | Tumor_G1 |
| 3767 | SLC25A5  | 7.584982816 | Tumor_G1 |
| 3768 | UCP2     | 7.420880074 | Tumor_G1 |
| 3769 | SOD2     | 5.677203089 | Tumor_G1 |
| 3770 | NOX4     | 2.96975116  | Tumor_G1 |
| 3771 | DUOX1    | 4.464722758 | Tumor_G1 |
| 3772 | DUOXA1   | 4.825880406 | Tumor_G1 |
| 3773 | DUOX2    | 3.651916489 | Tumor_G1 |
| 3774 | DUOXA2   | 1.958616417 | Tumor_G1 |
| 3775 | NDUFA1   | 8.047721961 | Tumor_G1 |
| 3776 | NDUFA2   | 6.483037521 | Tumor_G1 |
| 3777 | NDUFA8   | 6.825500267 | Tumor_G1 |
| 3778 | NDUFB1   | 5.638280503 | Tumor_G1 |
| 3779 | NDUFB10  | 7.353744118 | Tumor_G1 |
| 3780 | NDUFB2   | 6.172315978 | Tumor_G1 |
| 3781 | NDUFB3   | 6.55155758  | Tumor_G1 |
| 3782 | NDUFB7   | 8.491727351 | Tumor_G1 |
| 3783 | CYC1     | 6.458874488 | Tumor_G1 |
| 3784 | ETFB     | 4.905695    | Tumor_G1 |
| 3785 | UQCR10   | 7.626604719 | Tumor_G1 |
| 3786 | UQCRQ    | 7.194989674 | Tumor_G1 |
| 3787 | UQCC3    | 4.030750409 | Tumor_G1 |
| 3788 | COX15    | 4.884564691 | Tumor_G1 |
| 3789 | COX5A    | 7.208487466 | Tumor_G1 |
| 3790 | COX6B1   | 8.437776055 | Tumor_G1 |
| 3791 | COX6C    | 6.32285023  | Tumor_G1 |
| 3792 | COX7A2   | 6.835723577 | Tumor_G1 |
| 3793 | COX7B    | 5.835274861 | Tumor_G1 |
| 3794 | COX8A    | 8.990613448 | Tumor_G1 |
| 3795 | SCO1     | 3.75012178  | Tumor_G1 |
| 3796 | SURF1    | 5.913286553 | Tumor_G1 |
| 3797 | ATP6V1E1 | 7.014655015 | Tumor_G1 |
| 3798 | DLAT     | 5.856879907 | Tumor_G1 |

|      |          |             |          |
|------|----------|-------------|----------|
| 3799 | PDC      | 0.184302677 | Tumor_G1 |
| 3800 | SUCLG2   | 6.391703705 | Tumor_G1 |
| 3801 | SLC25A5  | 8.262711656 | Tumor_G1 |
| 3802 | UCP2     | 8.871832578 | Tumor_G1 |
| 3803 | SOD2     | 5.327496296 | Tumor_G1 |
| 3804 | NOX4     | 3.10309825  | Tumor_G1 |
| 3805 | DUOX1    | 6.588048626 | Tumor_G1 |
| 3806 | DUOXA1   | 6.712291823 | Tumor_G1 |
| 3807 | DUOX2    | 6.966403011 | Tumor_G1 |
| 3808 | DUOXA2   | 4.550452819 | Tumor_G1 |
| 3809 | NDUFA1   | 7.989789428 | Tumor_G1 |
| 3810 | NDUFA2   | 7.037450071 | Tumor_G1 |
| 3811 | NDUFA8   | 6.734812949 | Tumor_G1 |
| 3812 | NDUFB1   | 5.507210348 | Tumor_G1 |
| 3813 | NDUFB10  | 7.698697776 | Tumor_G1 |
| 3814 | NDUFB2   | 6.444512124 | Tumor_G1 |
| 3815 | NDUFB3   | 6.06799409  | Tumor_G1 |
| 3816 | NDUFB7   | 8.810438542 | Tumor_G1 |
| 3817 | CYC1     | 6.816154771 | Tumor_G1 |
| 3818 | ETFB     | 5.026677304 | Tumor_G1 |
| 3819 | UQCR10   | 7.706279857 | Tumor_G1 |
| 3820 | UQCRQ    | 7.394661429 | Tumor_G1 |
| 3821 | UQCC3    | 4.313444068 | Tumor_G1 |
| 3822 | COX15    | 4.067568532 | Tumor_G1 |
| 3823 | COX5A    | 7.288998329 | Tumor_G1 |
| 3824 | COX6B1   | 8.981457897 | Tumor_G1 |
| 3825 | COX6C    | 6.414160009 | Tumor_G1 |
| 3826 | COX7A2   | 6.791625226 | Tumor_G1 |
| 3827 | COX7B    | 5.836173649 | Tumor_G1 |
| 3828 | COX8A    | 9.305989453 | Tumor_G1 |
| 3829 | SCO1     | 2.48830035  | Tumor_G1 |
| 3830 | SURF1    | 6.228464427 | Tumor_G1 |
| 3831 | ATP6V1E1 | 7.156524807 | Tumor_G1 |
| 3832 | DLAT     | 4.13303671  | Tumor_G1 |
| 3833 | PDC      | 0.040192972 | Tumor_G1 |
| 3834 | SUCLG2   | 5.701492358 | Tumor_G1 |
| 3835 | SLC25A5  | 7.721264532 | Tumor_G1 |
| 3836 | UCP2     | 7.705129816 | Tumor_G1 |
| 3837 | SOD2     | 5.609612542 | Tumor_G1 |
| 3838 | NOX4     | 2.924140241 | Tumor_G1 |



|      |          |             |          |
|------|----------|-------------|----------|
| 3839 | DUOX1    | 5.899194575 | Tumor_G1 |
| 3840 | DUOXA1   | 5.799985626 | Tumor_G1 |
| 3841 | DUOX2    | 4.654671739 | Tumor_G1 |
| 3842 | DUOXA2   | 3.0301179   | Tumor_G1 |
| 3843 | NDUFA1   | 8.155860699 | Tumor_G1 |
| 3844 | NDUFA2   | 7.401112635 | Tumor_G1 |
| 3845 | NDUFA8   | 6.253013702 | Tumor_G1 |
| 3846 | NDUFB1   | 6.383187129 | Tumor_G1 |
| 3847 | NDUFB10  | 7.729360137 | Tumor_G1 |
| 3848 | NDUFB2   | 6.066904101 | Tumor_G1 |
| 3849 | NDUFB3   | 6.33088228  | Tumor_G1 |
| 3850 | NDUFB7   | 9.453956907 | Tumor_G1 |
| 3851 | CYC1     | 6.67942097  | Tumor_G1 |
| 3852 | ETFB     | 5.204806281 | Tumor_G1 |
| 3853 | UQCR10   | 7.785095382 | Tumor_G1 |
| 3854 | UQCRQ    | 7.78343114  | Tumor_G1 |
| 3855 | UQCC3    | 5.121895264 | Tumor_G1 |
| 3856 | COX15    | 4.112375655 | Tumor_G1 |
| 3857 | COX5A    | 7.220431857 | Tumor_G1 |
| 3858 | COX6B1   | 9.178613665 | Tumor_G1 |
| 3859 | COX6C    | 6.599877192 | Tumor_G1 |
| 3860 | COX7A2   | 6.828912181 | Tumor_G1 |
| 3861 | COX7B    | 6.255262158 | Tumor_G1 |
| 3862 | COX8A    | 9.315970442 | Tumor_G1 |
| 3863 | SCO1     | 2.43852774  | Tumor_G1 |
| 3864 | SURF1    | 5.998921069 | Tumor_G1 |
| 3865 | ATP6V1E1 | 6.659326661 | Tumor_G1 |
| 3866 | DLAT     | 4.694656742 | Tumor_G1 |
| 3867 | PDC      | 0           | Tumor_G1 |
| 3868 | SUCLG2   | 5.326831778 | Tumor_G1 |
| 3869 | SLC25A5  | 7.592501452 | Tumor_G1 |
| 3870 | UCP2     | 8.501630502 | Tumor_G1 |
| 3871 | SOD2     | 4.919118432 | Tumor_G1 |
| 3872 | NOX4     | 1.594266706 | Tumor_G1 |
| 3873 | DUOX1    | 4.942991643 | Tumor_G1 |
| 3874 | DUOXA1   | 4.947829568 | Tumor_G1 |
| 3875 | DUOX2    | 2.53765001  | Tumor_G1 |
| 3876 | DUOXA2   | 0.549875022 | Tumor_G1 |
| 3877 | NDUFA1   | 8.015370096 | Tumor_G1 |
| 3878 | NDUFA2   | 6.82295843  | Tumor_G1 |

|      |          |             |          |
|------|----------|-------------|----------|
| 3879 | NDUFA8   | 6.95815582  | Tumor_G1 |
| 3880 | NDUFB1   | 5.608170284 | Tumor_G1 |
| 3881 | NDUFB10  | 7.187048982 | Tumor_G1 |
| 3882 | NDUFB2   | 6.526045906 | Tumor_G1 |
| 3883 | NDUFB3   | 6.357978054 | Tumor_G1 |
| 3884 | NDUFB7   | 8.508521727 | Tumor_G1 |
| 3885 | CYC1     | 6.57950372  | Tumor_G1 |
| 3886 | ETFB     | 4.762692089 | Tumor_G1 |
| 3887 | UQCR10   | 7.465200786 | Tumor_G1 |
| 3888 | UQCRQ    | 7.278574562 | Tumor_G1 |
| 3889 | UQCC3    | 4.115799265 | Tumor_G1 |
| 3890 | COX15    | 4.349122173 | Tumor_G1 |
| 3891 | COX5A    | 7.030140086 | Tumor_G1 |
| 3892 | COX6B1   | 8.687943754 | Tumor_G1 |
| 3893 | COX6C    | 6.324620602 | Tumor_G1 |
| 3894 | COX7A2   | 6.971789436 | Tumor_G1 |
| 3895 | COX7B    | 5.978518617 | Tumor_G1 |
| 3896 | COX8A    | 9.151046039 | Tumor_G1 |
| 3897 | SCO1     | 2.998858711 | Tumor_G1 |
| 3898 | SURF1    | 6.110110706 | Tumor_G1 |
| 3899 | ATP6V1E1 | 7.151381352 | Tumor_G1 |
| 3900 | DLAT     | 5.065060302 | Tumor_G1 |
| 3901 | PDC      | 0           | Tumor_G1 |
| 3902 | SUCLG2   | 6.071607381 | Tumor_G1 |
| 3903 | SLC25A5  | 8.101604259 | Tumor_G1 |
| 3904 | UCP2     | 8.335536241 | Tumor_G1 |
| 3905 | SOD2     | 5.841846544 | Tumor_G1 |
| 3906 | NOX4     | 3.028144503 | Tumor_G1 |
| 3907 | DUOX1    | 5.346568353 | Tumor_G1 |
| 3908 | DUOXA1   | 5.693851785 | Tumor_G1 |
| 3909 | DUOX2    | 5.241204509 | Tumor_G1 |
| 3910 | DUOXA2   | 3.840765299 | Tumor_G1 |
| 3911 | NDUFA1   | 7.530272618 | Tumor_G1 |
| 3912 | NDUFA2   | 6.367451785 | Tumor_G1 |
| 3913 | NDUFA8   | 6.723390591 | Tumor_G1 |
| 3914 | NDUFB1   | 5.450826466 | Tumor_G1 |
| 3915 | NDUFB10  | 7.227398645 | Tumor_G1 |
| 3916 | NDUFB2   | 6.057482916 | Tumor_G1 |
| 3917 | NDUFB3   | 5.872466513 | Tumor_G1 |
| 3918 | NDUFB7   | 8.291089785 | Tumor_G1 |

|      |          |             |          |
|------|----------|-------------|----------|
| 3919 | CYC1     | 6.508568285 | Tumor_G1 |
| 3920 | ETFB     | 4.686963431 | Tumor_G1 |
| 3921 | UQCR10   | 7.277988981 | Tumor_G1 |
| 3922 | UQCRQ    | 6.81753483  | Tumor_G1 |
| 3923 | UQCC3    | 4.214710027 | Tumor_G1 |
| 3924 | COX15    | 4.545802886 | Tumor_G1 |
| 3925 | COX5A    | 6.718217414 | Tumor_G1 |
| 3926 | COX6B1   | 8.255490534 | Tumor_G1 |
| 3927 | COX6C    | 6.007058393 | Tumor_G1 |
| 3928 | COX7A2   | 6.485459342 | Tumor_G1 |
| 3929 | COX7B    | 5.61312635  | Tumor_G1 |
| 3930 | COX8A    | 8.810654002 | Tumor_G1 |
| 3931 | SCO1     | 2.864471168 | Tumor_G1 |
| 3932 | SURF1    | 6.04697571  | Tumor_G1 |
| 3933 | ATP6V1E1 | 6.738628612 | Tumor_G1 |
| 3934 | DLAT     | 4.91419975  | Tumor_G1 |
| 3935 | PDC      | 0.072149682 | Tumor_G1 |
| 3936 | SUCLG2   | 5.946936655 | Tumor_G1 |
| 3937 | SLC25A5  | 7.646464582 | Tumor_G1 |
| 3938 | UCP2     | 8.13921729  | Tumor_G1 |
| 3939 | SOD2     | 5.225327942 | Tumor_G1 |
| 3940 | NOX4     | 1.460261924 | Tumor_G1 |
| 3941 | DUOX1    | 6.198155146 | Tumor_G1 |
| 3942 | DUOXA1   | 6.373103669 | Tumor_G1 |
| 3943 | DUOX2    | 6.613039621 | Tumor_G1 |
| 3944 | DUOXA2   | 4.743276325 | Tumor_G1 |
| 3945 | NDUFA1   | 7.578997886 | Tumor_G1 |
| 3946 | NDUFA2   | 6.781299928 | Tumor_G1 |
| 3947 | NDUFA8   | 6.78793221  | Tumor_G1 |
| 3948 | NDUFB1   | 5.57814518  | Tumor_G1 |
| 3949 | NDUFB10  | 7.621764521 | Tumor_G1 |
| 3950 | NDUFB2   | 6.101717073 | Tumor_G1 |
| 3951 | NDUFB3   | 5.77734239  | Tumor_G1 |
| 3952 | NDUFB7   | 8.476924227 | Tumor_G1 |
| 3953 | CYC1     | 6.379983715 | Tumor_G1 |
| 3954 | ETFB     | 4.602167281 | Tumor_G1 |
| 3955 | UQCR10   | 7.38956464  | Tumor_G1 |
| 3956 | UQCRQ    | 7.172529387 | Tumor_G1 |
| 3957 | UQCC3    | 4.070270046 | Tumor_G1 |
| 3958 | COX15    | 3.943830209 | Tumor_G1 |

|      |          |             |          |
|------|----------|-------------|----------|
| 3959 | COX5A    | 6.970648147 | Tumor_G1 |
| 3960 | COX6B1   | 8.721988302 | Tumor_G1 |
| 3961 | COX6C    | 6.26494455  | Tumor_G1 |
| 3962 | COX7A2   | 6.588038276 | Tumor_G1 |
| 3963 | COX7B    | 5.74717314  | Tumor_G1 |
| 3964 | COX8A    | 8.909891368 | Tumor_G1 |
| 3965 | SCO1     | 2.466002352 | Tumor_G1 |
| 3966 | SURF1    | 5.642343409 | Tumor_G1 |
| 3967 | ATP6V1E1 | 6.780361836 | Tumor_G1 |
| 3968 | DLAT     | 4.330508043 | Tumor_G1 |
| 3969 | PDC      | 0           | Tumor_G1 |
| 3970 | SUCLG2   | 5.777352501 | Tumor_G1 |
| 3971 | SLC25A5  | 7.618140093 | Tumor_G1 |
| 3972 | UCP2     | 8.525275451 | Tumor_G1 |
| 3973 | SOD2     | 4.704510874 | Tumor_G1 |
| 3974 | NOX4     | 3.137465862 | Tumor_G1 |
| 3975 | DUOX1    | 4.956996852 | Tumor_G1 |
| 3976 | DUOXA1   | 5.280396337 | Tumor_G1 |
| 3977 | DUOX2    | 4.198357745 | Tumor_G1 |
| 3978 | DUOXA2   | 3.179197886 | Tumor_G1 |
| 3979 | NDUFA1   | 7.759345828 | Tumor_G1 |
| 3980 | NDUFA2   | 6.919851733 | Tumor_G1 |
| 3981 | NDUFA8   | 6.825999451 | Tumor_G1 |
| 3982 | NDUFB1   | 5.503386023 | Tumor_G1 |
| 3983 | NDUFB10  | 7.596128777 | Tumor_G1 |
| 3984 | NDUFB2   | 6.29374177  | Tumor_G1 |
| 3985 | NDUFB3   | 5.746656293 | Tumor_G1 |
| 3986 | NDUFB7   | 8.765928488 | Tumor_G1 |
| 3987 | CYC1     | 6.542122847 | Tumor_G1 |
| 3988 | ETFB     | 4.675747859 | Tumor_G1 |
| 3989 | UQCR10   | 7.560695034 | Tumor_G1 |
| 3990 | UQCRQ    | 7.280752281 | Tumor_G1 |
| 3991 | UQCC3    | 3.987561151 | Tumor_G1 |
| 3992 | COX15    | 3.827957258 | Tumor_G1 |
| 3993 | COX5A    | 7.08684999  | Tumor_G1 |
| 3994 | COX6B1   | 8.820545902 | Tumor_G1 |
| 3995 | COX6C    | 6.386395586 | Tumor_G1 |
| 3996 | COX7A2   | 6.797376891 | Tumor_G1 |
| 3997 | COX7B    | 5.839216115 | Tumor_G1 |
| 3998 | COX8A    | 9.211731226 | Tumor_G1 |

|      |          |             |          |
|------|----------|-------------|----------|
| 3999 | SCO1     | 2.32114496  | Tumor_G1 |
| 4000 | SURF1    | 5.923150586 | Tumor_G1 |
| 4001 | ATP6V1E1 | 6.896379724 | Tumor_G1 |
| 4002 | DLAT     | 4.560091876 | Tumor_G1 |
| 4003 | PDC      | 0.034095883 | Tumor_G1 |
| 4004 | SUCLG2   | 5.76968526  | Tumor_G1 |
| 4005 | SLC25A5  | 7.527707036 | Tumor_G1 |
| 4006 | UCP2     | 8.444829747 | Tumor_G1 |
| 4007 | SOD2     | 4.307430455 | Tumor_G1 |
| 4008 | NOX4     | 2.268706997 | Tumor_G1 |
| 4009 | DUOX1    | 5.583033914 | Tumor_G1 |
| 4010 | DUOXA1   | 5.743658478 | Tumor_G1 |
| 4011 | DUOX2    | 5.284340636 | Tumor_G1 |
| 4012 | DUOXA2   | 3.538501806 | Tumor_G1 |
| 4013 | NDUFA1   | 7.626215773 | Tumor_G1 |
| 4014 | NDUFA2   | 6.441782343 | Tumor_G1 |
| 4015 | NDUFA8   | 6.789623717 | Tumor_G1 |
| 4016 | NDUFB1   | 5.183888773 | Tumor_G1 |
| 4017 | NDUFB10  | 7.202746152 | Tumor_G1 |
| 4018 | NDUFB2   | 6.253687357 | Tumor_G1 |
| 4019 | NDUFB3   | 5.978706429 | Tumor_G1 |
| 4020 | NDUFB7   | 8.291856104 | Tumor_G1 |
| 4021 | CYC1     | 6.632747295 | Tumor_G1 |
| 4022 | ETFB     | 4.445207736 | Tumor_G1 |
| 4023 | UQCR10   | 7.094706435 | Tumor_G1 |
| 4024 | UQCRQ    | 6.995658207 | Tumor_G1 |
| 4025 | UQCC3    | 3.841981454 | Tumor_G1 |
| 4026 | COX15    | 4.357658928 | Tumor_G1 |
| 4027 | COX5A    | 7.107100674 | Tumor_G1 |
| 4028 | COX6B1   | 8.372836899 | Tumor_G1 |
| 4029 | COX6C    | 5.980500921 | Tumor_G1 |
| 4030 | COX7A2   | 6.595020418 | Tumor_G1 |
| 4031 | COX7B    | 5.793943762 | Tumor_G1 |
| 4032 | COX8A    | 9.082412637 | Tumor_G1 |
| 4033 | SCO1     | 2.920641876 | Tumor_G1 |
| 4034 | SURF1    | 6.161391982 | Tumor_G1 |
| 4035 | ATP6V1E1 | 7.130854598 | Tumor_G1 |
| 4036 | DLAT     | 5.202023405 | Tumor_G1 |
| 4037 | PDC      | 0.049888595 | Tumor_G1 |
| 4038 | SUCLG2   | 6.203829838 | Tumor_G1 |

|      |          |             |          |
|------|----------|-------------|----------|
| 4039 | SLC25A5  | 8.45345492  | Tumor_G1 |
| 4040 | UCP2     | 8.481431776 | Tumor_G1 |
| 4041 | SOD2     | 5.422117622 | Tumor_G1 |
| 4042 | NOX4     | 2.908306331 | Tumor_G1 |
| 4043 | DUOX1    | 5.636271476 | Tumor_G1 |
| 4044 | DUOXA1   | 5.620632297 | Tumor_G1 |
| 4045 | DUOX2    | 5.14754389  | Tumor_G1 |
| 4046 | DUOXA2   | 2.998425304 | Tumor_G1 |
| 4047 | NDUFA1   | 7.679893246 | Tumor_G1 |
| 4048 | NDUFA2   | 6.391895628 | Tumor_G1 |
| 4049 | NDUFA8   | 6.69965896  | Tumor_G1 |
| 4050 | NDUFB1   | 5.117243434 | Tumor_G1 |
| 4051 | NDUFB10  | 7.128206288 | Tumor_G1 |
| 4052 | NDUFB2   | 6.282916831 | Tumor_G1 |
| 4053 | NDUFB3   | 5.80561412  | Tumor_G1 |
| 4054 | NDUFB7   | 8.279069932 | Tumor_G1 |
| 4055 | CYC1     | 6.557561908 | Tumor_G1 |
| 4056 | ETFB     | 4.787184891 | Tumor_G1 |
| 4057 | UQCR10   | 6.627212846 | Tumor_G1 |
| 4058 | UQCRQ    | 7.060948697 | Tumor_G1 |
| 4059 | UQCC3    | 4.17944902  | Tumor_G1 |
| 4060 | COX15    | 4.384056145 | Tumor_G1 |
| 4061 | COX5A    | 6.683595566 | Tumor_G1 |
| 4062 | COX6B1   | 8.502399322 | Tumor_G1 |
| 4063 | COX6C    | 5.89662002  | Tumor_G1 |
| 4064 | COX7A2   | 6.514288311 | Tumor_G1 |
| 4065 | COX7B    | 5.604914024 | Tumor_G1 |
| 4066 | COX8A    | 9.288619241 | Tumor_G1 |
| 4067 | SCO1     | 2.770032786 | Tumor_G1 |
| 4068 | SURF1    | 5.868476573 | Tumor_G1 |
| 4069 | ATP6V1E1 | 6.093842524 | Tumor_G1 |
| 4070 | DLAT     | 4.841248307 | Tumor_G1 |
| 4071 | PDC      | 0           | Tumor_G1 |
| 4072 | SUCLG2   | 5.790574721 | Tumor_G1 |
| 4073 | SLC25A5  | 7.649762856 | Tumor_G1 |
| 4074 | UCP2     | 8.175224144 | Tumor_G1 |
| 4075 | SOD2     | 4.294908103 | Tumor_G1 |
| 4076 | NOX4     | 2.587920862 | Tumor_G1 |
| 4077 | DUOX1    | 5.794629411 | Tumor_G1 |
| 4078 | DUOXA1   | 5.999615468 | Tumor_G1 |

|      |          |             |          |
|------|----------|-------------|----------|
| 4079 | DUOX2    | 6.531224387 | Tumor_G1 |
| 4080 | DUOXA2   | 3.788493779 | Tumor_G1 |
| 4081 | NDUFA1   | 7.75461919  | Tumor_G1 |
| 4082 | NDUFA2   | 6.262906837 | Tumor_G1 |
| 4083 | NDUFA8   | 6.68963248  | Tumor_G1 |
| 4084 | NDUFB1   | 5.327308039 | Tumor_G1 |
| 4085 | NDUFB10  | 6.994818771 | Tumor_G1 |
| 4086 | NDUFB2   | 6.243336714 | Tumor_G1 |
| 4087 | NDUFB3   | 6.03783669  | Tumor_G1 |
| 4088 | NDUFB7   | 8.058578066 | Tumor_G1 |
| 4089 | CYC1     | 6.427156211 | Tumor_G1 |
| 4090 | ETFB     | 4.743521365 | Tumor_G1 |
| 4091 | UQCR10   | 7.125960924 | Tumor_G1 |
| 4092 | UQCRQ    | 6.736115487 | Tumor_G1 |
| 4093 | UQCC3    | 3.490865674 | Tumor_G1 |
| 4094 | COX15    | 4.853762196 | Tumor_G1 |
| 4095 | COX5A    | 6.776302594 | Tumor_G1 |
| 4096 | COX6B1   | 8.270167239 | Tumor_G1 |
| 4097 | COX6C    | 6.098870948 | Tumor_G1 |
| 4098 | COX7A2   | 6.542112874 | Tumor_G1 |
| 4099 | COX7B    | 5.725258746 | Tumor_G1 |
| 4100 | COX8A    | 8.972604605 | Tumor_G1 |
| 4101 | SCO1     | 3.294760233 | Tumor_G1 |
| 4102 | SURF1    | 5.927908515 | Tumor_G1 |
| 4103 | ATP6V1E1 | 6.886710768 | Tumor_G1 |
| 4104 | DLAT     | 5.407711855 | Tumor_G1 |
| 4105 | PDC      | 0.129066468 | Tumor_G1 |
| 4106 | SUCLG2   | 6.181854852 | Tumor_G1 |
| 4107 | SLC25A5  | 8.198129466 | Tumor_G1 |
| 4108 | UCP2     | 8.469722988 | Tumor_G1 |
| 4109 | SOD2     | 5.961984645 | Tumor_G1 |
| 4110 | NOX4     | 1.892754978 | Tumor_G1 |
| 4111 | DUOX1    | 6.494785404 | Tumor_G1 |
| 4112 | DUOXA1   | 6.597844918 | Tumor_G1 |
| 4113 | DUOX2    | 7.199914278 | Tumor_G1 |
| 4114 | DUOXA2   | 4.195337057 | Tumor_G1 |
| 4115 | NDUFA1   | 7.392030164 | Tumor_G1 |
| 4116 | NDUFA2   | 5.990398152 | Tumor_G1 |
| 4117 | NDUFA8   | 6.674991619 | Tumor_G1 |
| 4118 | NDUFB1   | 4.8916281   | Tumor_G1 |

|      |          |             |          |
|------|----------|-------------|----------|
| 4119 | NDUFB10  | 7.162683944 | Tumor_G1 |
| 4120 | NDUFB2   | 5.600798169 | Tumor_G1 |
| 4121 | NDUFB3   | 5.661787112 | Tumor_G1 |
| 4122 | NDUFB7   | 8.266164553 | Tumor_G1 |
| 4123 | CYC1     | 6.334666718 | Tumor_G1 |
| 4124 | ETFB     | 4.690190642 | Tumor_G1 |
| 4125 | UQCR10   | 7.193420021 | Tumor_G1 |
| 4126 | UQCRQ    | 6.652234587 | Tumor_G1 |
| 4127 | UQCC3    | 3.686010115 | Tumor_G1 |
| 4128 | COX15    | 4.624160046 | Tumor_G1 |
| 4129 | COX5A    | 6.385122531 | Tumor_G1 |
| 4130 | COX6B1   | 8.617669166 | Tumor_G1 |
| 4131 | COX6C    | 5.548876318 | Tumor_G1 |
| 4132 | COX7A2   | 6.22849605  | Tumor_G1 |
| 4133 | COX7B    | 5.618945887 | Tumor_G1 |
| 4134 | COX8A    | 8.770774055 | Tumor_G1 |
| 4135 | SCO1     | 2.993301621 | Tumor_G1 |
| 4136 | SURF1    | 6.030248296 | Tumor_G1 |
| 4137 | ATP6V1E1 | 6.804504606 | Tumor_G1 |
| 4138 | DLAT     | 4.660217533 | Tumor_G1 |
| 4139 | PDC      | 0.136638916 | Tumor_G1 |
| 4140 | SUCLG2   | 5.763269247 | Tumor_G1 |
| 4141 | SLC25A5  | 7.712824259 | Tumor_G1 |
| 4142 | UCP2     | 7.887343863 | Tumor_G1 |
| 4143 | SOD2     | 4.831310195 | Tumor_G1 |
| 4144 | NOX4     | 2.658390478 | Tumor_G1 |
| 4145 | DUOX1    | 6.566881065 | Tumor_G1 |
| 4146 | DUOXA1   | 6.440129357 | Tumor_G1 |
| 4147 | DUOX2    | 6.133687551 | Tumor_G1 |
| 4148 | DUOXA2   | 3.961898685 | Tumor_G1 |
| 4149 | NDUFA1   | 7.625511447 | Tumor_G1 |
| 4150 | NDUFA2   | 6.847207007 | Tumor_G1 |
| 4151 | NDUFA8   | 6.842083763 | Tumor_G1 |
| 4152 | NDUFB1   | 5.386980188 | Tumor_G1 |
| 4153 | NDUFB10  | 7.204002053 | Tumor_G1 |
| 4154 | NDUFB2   | 6.481777973 | Tumor_G1 |
| 4155 | NDUFB3   | 6.27202329  | Tumor_G1 |
| 4156 | NDUFB7   | 8.486139878 | Tumor_G1 |
| 4157 | CYC1     | 6.80668351  | Tumor_G1 |
| 4158 | ETFB     | 4.622878305 | Tumor_G1 |



|      |          |             |          |
|------|----------|-------------|----------|
| 4159 | UQCR10   | 7.43262301  | Tumor_G1 |
| 4160 | UQCRQ    | 7.204748758 | Tumor_G1 |
| 4161 | UQCC3    | 3.888925529 | Tumor_G1 |
| 4162 | COX15    | 4.677613222 | Tumor_G1 |
| 4163 | COX5A    | 6.949297754 | Tumor_G1 |
| 4164 | COX6B1   | 8.665005062 | Tumor_G1 |
| 4165 | COX6C    | 6.30737568  | Tumor_G1 |
| 4166 | COX7A2   | 6.930567638 | Tumor_G1 |
| 4167 | COX7B    | 6.10831709  | Tumor_G1 |
| 4168 | COX8A    | 9.280491665 | Tumor_G1 |
| 4169 | SCO1     | 2.876719402 | Tumor_G1 |
| 4170 | SURF1    | 5.839990844 | Tumor_G1 |
| 4171 | ATP6V1E1 | 7.403887276 | Tumor_G1 |
| 4172 | DLAT     | 5.180138134 | Tumor_G1 |
| 4173 | PDC      | 0.111639377 | Tumor_G1 |
| 4174 | SUCLG2   | 6.560190427 | Tumor_G1 |
| 4175 | SLC25A5  | 8.544383116 | Tumor_G1 |
| 4176 | UCP2     | 8.001200277 | Tumor_G1 |
| 4177 | SOD2     | 6.101326401 | Tumor_G1 |
| 4178 | NOX4     | 3.069669378 | Tumor_G1 |
| 4179 | DUOX1    | 5.280893209 | Tumor_G1 |
| 4180 | DUOXA1   | 5.772470448 | Tumor_G1 |
| 4181 | DUOX2    | 5.124462069 | Tumor_G1 |
| 4182 | DUOXA2   | 3.310518802 | Tumor_G1 |
| 4183 | NDUFA1   | 7.457460201 | Tumor_G1 |
| 4184 | NDUFA2   | 6.356837184 | Tumor_G1 |
| 4185 | NDUFA8   | 6.725977294 | Tumor_G1 |
| 4186 | NDUFB1   | 4.885786765 | Tumor_G1 |
| 4187 | NDUFB10  | 7.056184553 | Tumor_G1 |
| 4188 | NDUFB2   | 6.206034393 | Tumor_G1 |
| 4189 | NDUFB3   | 5.846167931 | Tumor_G1 |
| 4190 | NDUFB7   | 8.139478891 | Tumor_G1 |
| 4191 | CYC1     | 6.461405324 | Tumor_G1 |
| 4192 | ETFB     | 4.444523931 | Tumor_G1 |
| 4193 | UQCR10   | 7.080498423 | Tumor_G1 |
| 4194 | UQCRQ    | 6.637010578 | Tumor_G1 |
| 4195 | UQCC3    | 3.934216582 | Tumor_G1 |
| 4196 | COX15    | 4.965021579 | Tumor_G1 |
| 4197 | COX5A    | 6.678823767 | Tumor_G1 |
| 4198 | COX6B1   | 8.068196638 | Tumor_G1 |

|      |          |             |          |
|------|----------|-------------|----------|
| 4199 | COX6C    | 6.024854479 | Tumor_G1 |
| 4200 | COX7A2   | 6.449126505 | Tumor_G1 |
| 4201 | COX7B    | 5.71682563  | Tumor_G1 |
| 4202 | COX8A    | 9.038121522 | Tumor_G1 |
| 4203 | SCO1     | 3.327917418 | Tumor_G1 |
| 4204 | SURF1    | 5.849557719 | Tumor_G1 |
| 4205 | ATP6V1E1 | 7.012799145 | Tumor_G1 |
| 4206 | DLAT     | 5.639548774 | Tumor_G1 |
| 4207 | PDC      | 0.121378788 | Tumor_G1 |
| 4208 | SUCLG2   | 6.080978222 | Tumor_G1 |
| 4209 | SLC25A5  | 8.33971903  | Tumor_G1 |
| 4210 | UCP2     | 7.707422055 | Tumor_G1 |
| 4211 | SOD2     | 5.344122049 | Tumor_G1 |
| 4212 | NOX4     | 2.413676061 | Tumor_G1 |
| 4213 | DUOX1    | 6.300937235 | Tumor_G1 |
| 4214 | DUOXA1   | 6.628344577 | Tumor_G1 |
| 4215 | DUOX2    | 6.937519177 | Tumor_G1 |
| 4216 | DUOXA2   | 4.823317957 | Tumor_G1 |
| 4217 | NDUFA1   | 7.458600612 | Tumor_G1 |
| 4218 | NDUFA2   | 6.515622539 | Tumor_G1 |
| 4219 | NDUFA8   | 6.85425595  | Tumor_G1 |
| 4220 | NDUFB1   | 5.106450314 | Tumor_G1 |
| 4221 | NDUFB10  | 7.275558399 | Tumor_G1 |
| 4222 | NDUFB2   | 5.911676758 | Tumor_G1 |
| 4223 | NDUFB3   | 5.890465054 | Tumor_G1 |
| 4224 | NDUFB7   | 8.332264445 | Tumor_G1 |
| 4225 | CYC1     | 6.808556852 | Tumor_G1 |
| 4226 | ETFB     | 4.835256893 | Tumor_G1 |
| 4227 | UQCR10   | 7.372195584 | Tumor_G1 |
| 4228 | UQCRQ    | 6.849630835 | Tumor_G1 |
| 4229 | UQCC3    | 4.135364059 | Tumor_G1 |
| 4230 | COX15    | 4.871243145 | Tumor_G1 |
| 4231 | COX5A    | 6.815862922 | Tumor_G1 |
| 4232 | COX6B1   | 8.476384678 | Tumor_G1 |
| 4233 | COX6C    | 6.04596825  | Tumor_G1 |
| 4234 | COX7A2   | 6.509527545 | Tumor_G1 |
| 4235 | COX7B    | 5.769878    | Tumor_G1 |
| 4236 | COX8A    | 8.955571206 | Tumor_G1 |
| 4237 | SCO1     | 3.237074048 | Tumor_G1 |
| 4238 | SURF1    | 6.205922456 | Tumor_G1 |

|      |          |             |          |
|------|----------|-------------|----------|
| 4239 | ATP6V1E1 | 6.828553442 | Tumor_G1 |
| 4240 | DLAT     | 5.137683028 | Tumor_G1 |
| 4241 | PDC      | 0.109197301 | Tumor_G1 |
| 4242 | SUCLG2   | 6.064570813 | Tumor_G1 |
| 4243 | SLC25A5  | 8.112181791 | Tumor_G1 |
| 4244 | UCP2     | 8.486142112 | Tumor_G1 |
| 4245 | SOD2     | 6.258281707 | Tumor_G1 |
| 4246 | NOX4     | 3.257963646 | Tumor_G1 |
| 4247 | DUOX1    | 6.330298515 | Tumor_G1 |
| 4248 | DUOXA1   | 6.707167496 | Tumor_G1 |
| 4249 | DUOX2    | 6.696085623 | Tumor_G1 |
| 4250 | DUOXA2   | 4.702812484 | Tumor_G1 |
| 4251 | NDUFA1   | 8.169744991 | Tumor_G1 |
| 4252 | NDUFA2   | 5.968918498 | Tumor_G1 |
| 4253 | NDUFA8   | 6.877839246 | Tumor_G1 |
| 4254 | NDUFB1   | 5.663607767 | Tumor_G1 |
| 4255 | NDUFB10  | 7.131873727 | Tumor_G1 |
| 4256 | NDUFB2   | 5.454765279 | Tumor_G1 |
| 4257 | NDUFB3   | 6.467448664 | Tumor_G1 |
| 4258 | NDUFB7   | 8.179860537 | Tumor_G1 |
| 4259 | CYC1     | 6.276061446 | Tumor_G1 |
| 4260 | ETFB     | 4.498277854 | Tumor_G1 |
| 4261 | UQCR10   | 7.72920794  | Tumor_G1 |
| 4262 | UQCRQ    | 7.007489896 | Tumor_G1 |
| 4263 | UQCC3    | 3.688431334 | Tumor_G1 |
| 4264 | COX15    | 4.701923741 | Tumor_G1 |
| 4265 | COX5A    | 6.874165449 | Tumor_G1 |
| 4266 | COX6B1   | 8.678144385 | Tumor_G1 |
| 4267 | COX6C    | 5.963514665 | Tumor_G1 |
| 4268 | COX7A2   | 6.813888702 | Tumor_G1 |
| 4269 | COX7B    | 6.313626146 | Tumor_G1 |
| 4270 | COX8A    | 8.33377463  | Tumor_G1 |
| 4271 | SCO1     | 3.141053641 | Tumor_G1 |
| 4272 | SURF1    | 5.94742519  | Tumor_G1 |
| 4273 | ATP6V1E1 | 6.627844762 | Tumor_G1 |
| 4274 | DLAT     | 4.631367477 | Tumor_G1 |
| 4275 | PDC      | 0.044172376 | Tumor_G1 |
| 4276 | SUCLG2   | 5.698063348 | Tumor_G1 |
| 4277 | SLC25A5  | 7.474973352 | Tumor_G1 |
| 4278 | UCP2     | 8.818212975 | Tumor_G1 |

|      |          |             |          |
|------|----------|-------------|----------|
| 4279 | SOD2     | 5.351057166 | Tumor_G1 |
| 4280 | NOX4     | 1.826736004 | Tumor_G1 |
| 4281 | DUOX1    | 5.857196344 | Tumor_G1 |
| 4282 | DUOXA1   | 6.375407214 | Tumor_G1 |
| 4283 | DUOX2    | 6.748935868 | Tumor_G1 |
| 4284 | DUOXA2   | 4.923968607 | Tumor_G1 |
| 4285 | NDUFA1   | 7.690273109 | Tumor_G1 |
| 4286 | NDUFA2   | 6.624842936 | Tumor_G1 |
| 4287 | NDUFA8   | 7.006615755 | Tumor_G1 |
| 4288 | NDUFB1   | 5.297733463 | Tumor_G1 |
| 4289 | NDUFB10  | 7.696348051 | Tumor_G1 |
| 4290 | NDUFB2   | 6.188546392 | Tumor_G1 |
| 4291 | NDUFB3   | 6.05169281  | Tumor_G1 |
| 4292 | NDUFB7   | 8.490024148 | Tumor_G1 |
| 4293 | CYC1     | 6.882285873 | Tumor_G1 |
| 4294 | ETFB     | 4.659511269 | Tumor_G1 |
| 4295 | UQCR10   | 7.600554943 | Tumor_G1 |
| 4296 | UQCRQ    | 7.340243062 | Tumor_G1 |
| 4297 | UQCC3    | 4.41805393  | Tumor_G1 |
| 4298 | COX15    | 4.882226379 | Tumor_G1 |
| 4299 | COX5A    | 7.150842277 | Tumor_G1 |
| 4300 | COX6B1   | 8.642931255 | Tumor_G1 |
| 4301 | COX6C    | 6.120298814 | Tumor_G1 |
| 4302 | COX7A2   | 6.671201082 | Tumor_G1 |
| 4303 | COX7B    | 5.763220817 | Tumor_G1 |
| 4304 | COX8A    | 9.280322702 | Tumor_G1 |
| 4305 | SCO1     | 3.552663007 | Tumor_G1 |
| 4306 | SURF1    | 6.177135432 | Tumor_G1 |
| 4307 | ATP6V1E1 | 6.902725355 | Tumor_G1 |
| 4308 | DLAT     | 5.281827672 | Tumor_G1 |
| 4309 | PDC      | 0.140795941 | Tumor_G1 |
| 4310 | SUCLG2   | 6.003297031 | Tumor_G1 |
| 4311 | SLC25A5  | 8.493662421 | Tumor_G1 |
| 4312 | UCP2     | 7.788716237 | Tumor_G1 |
| 4313 | SOD2     | 5.194968922 | Tumor_G1 |
| 4314 | NOX4     | 4.157278759 | Tumor_G1 |
| 4315 | DUOX1    | 5.395154348 | Tumor_G1 |
| 4316 | DUOXA1   | 5.665201104 | Tumor_G1 |
| 4317 | DUOX2    | 4.052358295 | Tumor_G1 |
| 4318 | DUOXA2   | 2.484193    | Tumor_G1 |

|      |          |             |          |
|------|----------|-------------|----------|
| 4319 | NDUFA1   | 7.270321375 | Tumor_G1 |
| 4320 | NDUFA2   | 6.618900888 | Tumor_G1 |
| 4321 | NDUFA8   | 6.970180016 | Tumor_G1 |
| 4322 | NDUFB1   | 4.910890235 | Tumor_G1 |
| 4323 | NDUFB10  | 7.281856555 | Tumor_G1 |
| 4324 | NDUFB2   | 6.285222148 | Tumor_G1 |
| 4325 | NDUFB3   | 5.92168454  | Tumor_G1 |
| 4326 | NDUFB7   | 8.395116247 | Tumor_G1 |
| 4327 | CYC1     | 6.780088258 | Tumor_G1 |
| 4328 | ETFB     | 4.573640952 | Tumor_G1 |
| 4329 | UQCR10   | 7.277925386 | Tumor_G1 |
| 4330 | UQCRQ    | 6.968763964 | Tumor_G1 |
| 4331 | UQCC3    | 4.136665766 | Tumor_G1 |
| 4332 | COX15    | 4.740169247 | Tumor_G1 |
| 4333 | COX5A    | 7.176399329 | Tumor_G1 |
| 4334 | COX6B1   | 8.446943855 | Tumor_G1 |
| 4335 | COX6C    | 5.752536206 | Tumor_G1 |
| 4336 | COX7A2   | 6.531396149 | Tumor_G1 |
| 4337 | COX7B    | 5.726593357 | Tumor_G1 |
| 4338 | COX8A    | 9.188298929 | Tumor_G1 |
| 4339 | SCO1     | 3.201037632 | Tumor_G1 |
| 4340 | SURF1    | 6.476172718 | Tumor_G1 |
| 4341 | ATP6V1E1 | 7.349918668 | Tumor_G1 |
| 4342 | DLAT     | 5.819218561 | Tumor_G1 |
| 4343 | PDC      | 0.11658513  | Tumor_G1 |
| 4344 | SUCLG2   | 6.233394636 | Tumor_G1 |
| 4345 | SLC25A5  | 8.733252374 | Tumor_G1 |
| 4346 | UCP2     | 9.574959075 | Tumor_G1 |
| 4347 | SOD2     | 5.019209292 | Tumor_G1 |
| 4348 | NOX4     | 3.539793754 | Tumor_G1 |
| 4349 | DUOX1    | 5.987390505 | Tumor_G1 |
| 4350 | DUOXA1   | 5.913767848 | Tumor_G1 |
| 4351 | DUOX2    | 5.023034655 | Tumor_G1 |
| 4352 | DUOXA2   | 3.959915775 | Tumor_G1 |
| 4353 | NDUFA1   | 7.531863697 | Tumor_G1 |
| 4354 | NDUFA2   | 6.662280254 | Tumor_G1 |
| 4355 | NDUFA8   | 6.799766461 | Tumor_G1 |
| 4356 | NDUFB1   | 5.216322489 | Tumor_G1 |
| 4357 | NDUFB10  | 7.060057184 | Tumor_G1 |
| 4358 | NDUFB2   | 6.106174014 | Tumor_G1 |

|      |          |             |          |
|------|----------|-------------|----------|
| 4359 | NDUFB3   | 5.988983055 | Tumor_G1 |
| 4360 | NDUFB7   | 8.069076421 | Tumor_G1 |
| 4361 | CYC1     | 6.465307767 | Tumor_G1 |
| 4362 | ETFB     | 4.232971671 | Tumor_G1 |
| 4363 | UQCR10   | 7.302898179 | Tumor_G1 |
| 4364 | UQCRQ    | 6.922697376 | Tumor_G1 |
| 4365 | UQCC3    | 3.675876747 | Tumor_G1 |
| 4366 | COX15    | 4.361090747 | Tumor_G1 |
| 4367 | COX5A    | 6.892742295 | Tumor_G1 |
| 4368 | COX6B1   | 8.373388665 | Tumor_G1 |
| 4369 | COX6C    | 6.091327188 | Tumor_G1 |
| 4370 | COX7A2   | 6.744247603 | Tumor_G1 |
| 4371 | COX7B    | 5.903489355 | Tumor_G1 |
| 4372 | COX8A    | 8.89138445  | Tumor_G1 |
| 4373 | SCO1     | 2.849398178 | Tumor_G1 |
| 4374 | SURF1    | 5.923548374 | Tumor_G1 |
| 4375 | ATP6V1E1 | 6.896811807 | Tumor_G1 |
| 4376 | DLAT     | 5.114685072 | Tumor_G1 |
| 4377 | PDC      | 0.106828573 | Tumor_G1 |
| 4378 | SUCLG2   | 5.72582242  | Tumor_G1 |
| 4379 | SLC25A5  | 8.092757939 | Tumor_G1 |
| 4380 | UCP2     | 7.800652039 | Tumor_G1 |
| 4381 | SOD2     | 6.760100805 | Tumor_G1 |
| 4382 | NOX4     | 2.689953318 | Tumor_G1 |
| 4383 | DUOX1    | 5.098526784 | Tumor_G1 |
| 4384 | DUOXA1   | 5.409860984 | Tumor_G1 |
| 4385 | DUOX2    | 4.393667588 | Tumor_G1 |
| 4386 | DUOXA2   | 2.519708387 | Tumor_G1 |
| 4387 | NDUFA1   | 7.646819489 | Tumor_G1 |
| 4388 | NDUFA2   | 6.45644746  | Tumor_G1 |
| 4389 | NDUFA8   | 6.599485778 | Tumor_G1 |
| 4390 | NDUFB1   | 5.165842236 | Tumor_G1 |
| 4391 | NDUFB10  | 7.181226298 | Tumor_G1 |
| 4392 | NDUFB2   | 5.895909616 | Tumor_G1 |
| 4393 | NDUFB3   | 5.611768989 | Tumor_G1 |
| 4394 | NDUFB7   | 8.338416402 | Tumor_G1 |
| 4395 | CYC1     | 6.270082891 | Tumor_G1 |
| 4396 | ETFB     | 4.136417191 | Tumor_G1 |
| 4397 | UQCR10   | 7.166852492 | Tumor_G1 |
| 4398 | UQCRQ    | 6.968289375 | Tumor_G1 |

|      |          |             |          |
|------|----------|-------------|----------|
| 4399 | UQCC3    | 3.808614353 | Tumor_G1 |
| 4400 | COX15    | 3.880543535 | Tumor_G1 |
| 4401 | COX5A    | 6.833529523 | Tumor_G1 |
| 4402 | COX6B1   | 8.290833424 | Tumor_G1 |
| 4403 | COX6C    | 5.772096711 | Tumor_G1 |
| 4404 | COX7A2   | 6.365647607 | Tumor_G1 |
| 4405 | COX7B    | 5.526514271 | Tumor_G1 |
| 4406 | COX8A    | 8.877447941 | Tumor_G1 |
| 4407 | SCO1     | 2.597444971 | Tumor_G1 |
| 4408 | SURF1    | 5.735216346 | Tumor_G1 |
| 4409 | ATP6V1E1 | 6.48599107  | Tumor_G1 |
| 4410 | DLAT     | 4.392707752 | Tumor_G1 |
| 4411 | PDC      | 0.141580078 | Tumor_G1 |
| 4412 | SUCLG2   | 5.435271777 | Tumor_G1 |
| 4413 | SLC25A5  | 7.554392902 | Tumor_G1 |
| 4414 | UCP2     | 7.377227647 | Tumor_G1 |
| 4415 | SOD2     | 6.334478305 | Tumor_G1 |
| 4416 | NOX4     | 1.279103768 | Tumor_G1 |
| 4417 | DUOX1    | 4.800510223 | Tumor_G1 |
| 4418 | DUOXA1   | 5.025754128 | Tumor_G1 |
| 4419 | DUOX2    | 4.162207424 | Tumor_G1 |
| 4420 | DUOXA2   | 2.507198603 | Tumor_G1 |
| 4421 | NDUFA1   | 7.570752024 | Tumor_G1 |
| 4422 | NDUFA2   | 6.587163937 | Tumor_G1 |
| 4423 | NDUFA8   | 6.815102262 | Tumor_G1 |
| 4424 | NDUFB1   | 4.967179521 | Tumor_G1 |
| 4425 | NDUFB10  | 7.521226336 | Tumor_G1 |
| 4426 | NDUFB2   | 6.459789811 | Tumor_G1 |
| 4427 | NDUFB3   | 5.729542149 | Tumor_G1 |
| 4428 | NDUFB7   | 7.849619213 | Tumor_G1 |
| 4429 | CYC1     | 6.692732412 | Tumor_G1 |
| 4430 | ETFB     | 4.530844033 | Tumor_G1 |
| 4431 | UQCR10   | 7.377207516 | Tumor_G1 |
| 4432 | UQCRQ    | 6.877813517 | Tumor_G1 |
| 4433 | UQCC3    | 3.996726536 | Tumor_G1 |
| 4434 | COX15    | 4.630700592 | Tumor_G1 |
| 4435 | COX5A    | 6.974559494 | Tumor_G1 |
| 4436 | COX6B1   | 8.549906651 | Tumor_G1 |
| 4437 | COX6C    | 5.872242297 | Tumor_G1 |
| 4438 | COX7A2   | 6.517617076 | Tumor_G1 |

|      |          |             |          |
|------|----------|-------------|----------|
| 4439 | COX7B    | 5.575937997 | Tumor_G1 |
| 4440 | COX8A    | 9.093231356 | Tumor_G1 |
| 4441 | SCO1     | 2.882206952 | Tumor_G1 |
| 4442 | SURF1    | 6.00727511  | Tumor_G1 |
| 4443 | ATP6V1E1 | 7.046692875 | Tumor_G1 |
| 4444 | DLAT     | 5.251081333 | Tumor_G1 |
| 4445 | PDC      | 0.09265756  | Tumor_G1 |
| 4446 | SUCLG2   | 6.323541522 | Tumor_G1 |
| 4447 | SLC25A5  | 7.697414819 | Tumor_G1 |
| 4448 | UCP2     | 7.279698182 | Tumor_G1 |
| 4449 | SOD2     | 6.499325612 | Tumor_G1 |
| 4450 | NOX4     | 1.927800454 | Tumor_G1 |
| 4451 | DUOX1    | 5.754737038 | Tumor_G1 |
| 4452 | DUOXA1   | 6.063000089 | Tumor_G1 |
| 4453 | DUOX2    | 5.512655646 | Tumor_G1 |
| 4454 | DUOXA2   | 3.581593983 | Tumor_G1 |
| 4455 | NDUFA1   | 7.788466273 | Tumor_G1 |
| 4456 | NDUFA2   | 6.682233823 | Tumor_G1 |
| 4457 | NDUFA8   | 6.688330435 | Tumor_G1 |
| 4458 | NDUFB1   | 5.61776818  | Tumor_G1 |
| 4459 | NDUFB10  | 7.316204831 | Tumor_G1 |
| 4460 | NDUFB2   | 6.312078907 | Tumor_G1 |
| 4461 | NDUFB3   | 6.117679488 | Tumor_G1 |
| 4462 | NDUFB7   | 8.443427021 | Tumor_G1 |
| 4463 | CYC1     | 6.637264201 | Tumor_G1 |
| 4464 | ETFB     | 4.899435511 | Tumor_G1 |
| 4465 | UQCR10   | 7.547316355 | Tumor_G1 |
| 4466 | UQCRQ    | 7.194123356 | Tumor_G1 |
| 4467 | UQCC3    | 4.154231826 | Tumor_G1 |
| 4468 | COX15    | 4.2082815   | Tumor_G1 |
| 4469 | COX5A    | 6.984567023 | Tumor_G1 |
| 4470 | COX6B1   | 8.665585142 | Tumor_G1 |
| 4471 | COX6C    | 6.19852908  | Tumor_G1 |
| 4472 | COX7A2   | 6.839991003 | Tumor_G1 |
| 4473 | COX7B    | 5.801564451 | Tumor_G1 |
| 4474 | COX8A    | 9.324138912 | Tumor_G1 |
| 4475 | SCO1     | 2.837132357 | Tumor_G1 |
| 4476 | SURF1    | 5.841922857 | Tumor_G1 |
| 4477 | ATP6V1E1 | 7.073856202 | Tumor_G1 |
| 4478 | DLAT     | 4.515775123 | Tumor_G1 |



|      |          |             |          |
|------|----------|-------------|----------|
| 4479 | PDC      | 0           | Tumor_G1 |
| 4480 | SUCLG2   | 6.003035377 | Tumor_G1 |
| 4481 | SLC25A5  | 7.574417132 | Tumor_G1 |
| 4482 | UCP2     | 7.735784018 | Tumor_G1 |
| 4483 | SOD2     | 5.263805992 | Tumor_G1 |
| 4484 | NOX4     | 1.987106608 | Tumor_G1 |
| 4485 | DUOX1    | 5.496416035 | Tumor_G1 |
| 4486 | DUOXA1   | 6.011555817 | Tumor_G1 |
| 4487 | DUOX2    | 4.955998499 | Tumor_G1 |
| 4488 | DUOXA2   | 3.332878754 | Tumor_G1 |
| 4489 | NDUFA1   | 7.551669392 | Tumor_G1 |
| 4490 | NDUFA2   | 6.232266104 | Tumor_G1 |
| 4491 | NDUFA8   | 6.950922904 | Tumor_G1 |
| 4492 | NDUFB1   | 5.27615842  | Tumor_G1 |
| 4493 | NDUFB10  | 8.260156145 | Tumor_G1 |
| 4494 | NDUFB2   | 6.050250645 | Tumor_G1 |
| 4495 | NDUFB3   | 5.826488978 | Tumor_G1 |
| 4496 | NDUFB7   | 8.499547136 | Tumor_G1 |
| 4497 | CYC1     | 6.281962207 | Tumor_G1 |
| 4498 | ETFB     | 4.723496473 | Tumor_G1 |
| 4499 | UQCR10   | 7.340080697 | Tumor_G1 |
| 4500 | UQCRQ    | 7.087825949 | Tumor_G1 |
| 4501 | UQCC3    | 3.467593563 | Tumor_G1 |
| 4502 | COX15    | 4.175840802 | Tumor_G1 |
| 4503 | COX5A    | 7.300022472 | Tumor_G1 |
| 4504 | COX6B1   | 8.993004623 | Tumor_G1 |
| 4505 | COX6C    | 5.862102561 | Tumor_G1 |
| 4506 | COX7A2   | 6.532709856 | Tumor_G1 |
| 4507 | COX7B    | 5.988723208 | Tumor_G1 |
| 4508 | COX8A    | 9.126560273 | Tumor_G1 |
| 4509 | SCO1     | 2.004148503 | Tumor_G1 |
| 4510 | SURF1    | 6.197217614 | Tumor_G1 |
| 4511 | ATP6V1E1 | 6.842526131 | Tumor_G1 |
| 4512 | DLAT     | 4.262461666 | Tumor_G1 |
| 4513 | PDC      | 0.190493424 | Tumor_G1 |
| 4514 | SUCLG2   | 5.58791595  | Tumor_G1 |
| 4515 | SLC25A5  | 8.121976516 | Tumor_G1 |
| 4516 | UCP2     | 8.797691561 | Tumor_G1 |
| 4517 | SOD2     | 4.488693627 | Tumor_G1 |
| 4518 | NOX4     | 2.762892743 | Tumor_G1 |

|      |          |             |          |
|------|----------|-------------|----------|
| 4519 | DUOX1    | 5.252625998 | Tumor_G1 |
| 4520 | DUOXA1   | 5.719035766 | Tumor_G1 |
| 4521 | DUOX2    | 4.026123795 | Tumor_G1 |
| 4522 | DUOXA2   | 2.021058363 | Tumor_G1 |
| 4523 | NDUFA1   | 7.481232489 | Tumor_G1 |
| 4524 | NDUFA2   | 5.814216918 | Tumor_G1 |
| 4525 | NDUFA8   | 6.423777437 | Tumor_G1 |
| 4526 | NDUFB1   | 4.901603151 | Tumor_G1 |
| 4527 | NDUFB10  | 6.878123437 | Tumor_G1 |
| 4528 | NDUFB2   | 5.381957226 | Tumor_G1 |
| 4529 | NDUFB3   | 5.648063706 | Tumor_G1 |
| 4530 | NDUFB7   | 7.898451354 | Tumor_G1 |
| 4531 | CYC1     | 6.074242403 | Tumor_G1 |
| 4532 | ETFB     | 4.105502852 | Tumor_G1 |
| 4533 | UQCR10   | 6.965651772 | Tumor_G1 |
| 4534 | UQCRQ    | 6.462710003 | Tumor_G1 |
| 4535 | UQCC3    | 3.276175332 | Tumor_G1 |
| 4536 | COX15    | 4.73038658  | Tumor_G1 |
| 4537 | COX5A    | 6.286867095 | Tumor_G1 |
| 4538 | COX6B1   | 8.214397551 | Tumor_G1 |
| 4539 | COX6C    | 5.490771618 | Tumor_G1 |
| 4540 | COX7A2   | 5.885561704 | Tumor_G1 |
| 4541 | COX7B    | 5.747800463 | Tumor_G1 |
| 4542 | COX8A    | 8.69140485  | Tumor_G1 |
| 4543 | SCO1     | 3.013314837 | Tumor_G1 |
| 4544 | SURF1    | 5.455670065 | Tumor_G1 |
| 4545 | ATP6V1E1 | 6.597865148 | Tumor_G1 |
| 4546 | DLAT     | 5.089695513 | Tumor_G1 |
| 4547 | PDC      | 0.140597496 | Tumor_G1 |
| 4548 | SUCLG2   | 5.543589384 | Tumor_G1 |
| 4549 | SLC25A5  | 7.823740398 | Tumor_G1 |
| 4550 | UCP2     | 7.347244022 | Tumor_G1 |
| 4551 | SOD2     | 6.443459597 | Tumor_G1 |
| 4552 | NOX4     | 1.86467694  | Tumor_G1 |
| 4553 | DUOX1    | 6.047221686 | Tumor_G1 |
| 4554 | DUOXA1   | 6.213165792 | Tumor_G1 |
| 4555 | DUOX2    | 6.019146164 | Tumor_G1 |
| 4556 | DUOXA2   | 3.515759643 | Tumor_G1 |
| 4557 | NDUFA1   | 7.480505861 | Tumor_G1 |
| 4558 | NDUFA2   | 6.150239883 | Tumor_G1 |

|      |          |             |          |
|------|----------|-------------|----------|
| 4559 | NDUFA8   | 6.705819528 | Tumor_G1 |
| 4560 | NDUFB1   | 5.024880813 | Tumor_G1 |
| 4561 | NDUFB10  | 7.389665434 | Tumor_G1 |
| 4562 | NDUFB2   | 6.252860747 | Tumor_G1 |
| 4563 | NDUFB3   | 5.837197173 | Tumor_G1 |
| 4564 | NDUFB7   | 8.18203768  | Tumor_G1 |
| 4565 | CYC1     | 6.656156244 | Tumor_G1 |
| 4566 | ETFB     | 4.439038234 | Tumor_G1 |
| 4567 | UQCR10   | 7.059395054 | Tumor_G1 |
| 4568 | UQCRQ    | 6.754830527 | Tumor_G1 |
| 4569 | UQCC3    | 4.016925579 | Tumor_G1 |
| 4570 | COX15    | 4.967295741 | Tumor_G1 |
| 4571 | COX5A    | 7.029183614 | Tumor_G1 |
| 4572 | COX6B1   | 8.386929543 | Tumor_G1 |
| 4573 | COX6C    | 5.676776761 | Tumor_G1 |
| 4574 | COX7A2   | 6.515746759 | Tumor_G1 |
| 4575 | COX7B    | 5.806900769 | Tumor_G1 |
| 4576 | COX8A    | 9.196439243 | Tumor_G1 |
| 4577 | SCO1     | 3.42942346  | Tumor_G1 |
| 4578 | SURF1    | 6.107607059 | Tumor_G1 |
| 4579 | ATP6V1E1 | 7.006640526 | Tumor_G1 |
| 4580 | DLAT     | 5.352480743 | Tumor_G1 |
| 4581 | PDC      | 0.089775963 | Tumor_G1 |
| 4582 | SUCLG2   | 6.202124319 | Tumor_G1 |
| 4583 | SLC25A5  | 8.757176282 | Tumor_G1 |
| 4584 | UCP2     | 8.13723681  | Tumor_G1 |
| 4585 | SOD2     | 4.65937357  | Tumor_G1 |
| 4586 | NOX4     | 1.463697257 | Tumor_G1 |
| 4587 | DUOX1    | 5.951234434 | Tumor_G1 |
| 4588 | DUOXA1   | 6.328314041 | Tumor_G1 |
| 4589 | DUOX2    | 6.742155902 | Tumor_G1 |
| 4590 | DUOXA2   | 4.175218175 | Tumor_G1 |
| 4591 | NDUFA1   | 7.630635721 | Tumor_G1 |
| 4592 | NDUFA2   | 6.654563111 | Tumor_G1 |
| 4593 | NDUFA8   | 6.740879441 | Tumor_G1 |
| 4594 | NDUFB1   | 5.339773299 | Tumor_G1 |
| 4595 | NDUFB10  | 7.344564831 | Tumor_G1 |
| 4596 | NDUFB2   | 6.374309069 | Tumor_G1 |
| 4597 | NDUFB3   | 6.270793417 | Tumor_G1 |
| 4598 | NDUFB7   | 8.219968825 | Tumor_G1 |

|      |          |             |          |
|------|----------|-------------|----------|
| 4599 | CYC1     | 6.759978375 | Tumor_G1 |
| 4600 | ETFB     | 4.767861814 | Tumor_G1 |
| 4601 | UQCR10   | 7.537120092 | Tumor_G1 |
| 4602 | UQCRQ    | 7.180659215 | Tumor_G1 |
| 4603 | UQCC3    | 4.113513215 | Tumor_G1 |
| 4604 | COX15    | 4.730832236 | Tumor_G1 |
| 4605 | COX5A    | 7.152284396 | Tumor_G1 |
| 4606 | COX6B1   | 8.432466436 | Tumor_G1 |
| 4607 | COX6C    | 6.174875955 | Tumor_G1 |
| 4608 | COX7A2   | 6.789132565 | Tumor_G1 |
| 4609 | COX7B    | 5.789968869 | Tumor_G1 |
| 4610 | COX8A    | 9.254203745 | Tumor_G1 |
| 4611 | SCO1     | 3.184886161 | Tumor_G1 |
| 4612 | SURF1    | 6.209287472 | Tumor_G1 |
| 4613 | ATP6V1E1 | 7.252214558 | Tumor_G1 |
| 4614 | DLAT     | 5.450131702 | Tumor_G1 |
| 4615 | PDC      | 0.257466423 | Tumor_G1 |
| 4616 | SUCLG2   | 6.558527681 | Tumor_G1 |
| 4617 | SLC25A5  | 8.175236934 | Tumor_G1 |
| 4618 | UCP2     | 8.590923699 | Tumor_G1 |
| 4619 | SOD2     | 5.999153765 | Tumor_G1 |
| 4620 | NOX4     | 3.503672567 | Tumor_G1 |
| 4621 | DUOX1    | 6.060591197 | Tumor_G1 |
| 4622 | DUOXA1   | 6.052787073 | Tumor_G1 |
| 4623 | DUOX2    | 5.272954111 | Tumor_G1 |
| 4624 | DUOXA2   | 3.343488428 | Tumor_G1 |
| 4625 | NDUFA1   | 7.472015106 | Tumor_G1 |
| 4626 | NDUFA2   | 6.376771762 | Tumor_G1 |
| 4627 | NDUFA8   | 6.433993897 | Tumor_G1 |
| 4628 | NDUFB1   | 5.089042658 | Tumor_G1 |
| 4629 | NDUFB10  | 7.046716089 | Tumor_G1 |
| 4630 | NDUFB2   | 5.742845148 | Tumor_G1 |
| 4631 | NDUFB3   | 5.531334248 | Tumor_G1 |
| 4632 | NDUFB7   | 8.130968138 | Tumor_G1 |
| 4633 | CYC1     | 6.219907953 | Tumor_G1 |
| 4634 | ETFB     | 4.078850768 | Tumor_G1 |
| 4635 | UQCR10   | 7.036298365 | Tumor_G1 |
| 4636 | UQCRQ    | 6.686830492 | Tumor_G1 |
| 4637 | UQCC3    | 3.86959657  | Tumor_G1 |
| 4638 | COX15    | 3.979711665 | Tumor_G1 |

|      |          |             |          |
|------|----------|-------------|----------|
| 4639 | COX5A    | 6.69728249  | Tumor_G1 |
| 4640 | COX6B1   | 8.262582944 | Tumor_G1 |
| 4641 | COX6C    | 5.760949758 | Tumor_G1 |
| 4642 | COX7A2   | 6.119348888 | Tumor_G1 |
| 4643 | COX7B    | 5.308584148 | Tumor_G1 |
| 4644 | COX8A    | 8.738803559 | Tumor_G1 |
| 4645 | SCO1     | 2.364045433 | Tumor_G1 |
| 4646 | SURF1    | 5.715772143 | Tumor_G1 |
| 4647 | ATP6V1E1 | 6.250402747 | Tumor_G1 |
| 4648 | DLAT     | 4.206242935 | Tumor_G1 |
| 4649 | PDC      | 0.05305669  | Tumor_G1 |
| 4650 | SUCLG2   | 5.074385692 | Tumor_G1 |
| 4651 | SLC25A5  | 7.201955003 | Tumor_G1 |
| 4652 | UCP2     | 7.095651601 | Tumor_G1 |
| 4653 | SOD2     | 6.061027071 | Tumor_G1 |
| 4654 | NOX4     | 2.163686214 | Tumor_G1 |
| 4655 | DUOX1    | 4.986622696 | Tumor_G1 |
| 4656 | DUOXA1   | 5.121921337 | Tumor_G1 |
| 4657 | DUOX2    | 3.81537966  | Tumor_G1 |
| 4658 | DUOXA2   | 2.221199751 | Tumor_G1 |
| 4659 | NDUFA1   | 8.04298901  | Tumor_G1 |
| 4660 | NDUFA2   | 7.027049904 | Tumor_G1 |
| 4661 | NDUFA8   | 6.821455421 | Tumor_G1 |
| 4662 | NDUFB1   | 5.767457512 | Tumor_G1 |
| 4663 | NDUFB10  | 7.259619347 | Tumor_G1 |
| 4664 | NDUFB2   | 6.228401009 | Tumor_G1 |
| 4665 | NDUFB3   | 5.997732539 | Tumor_G1 |
| 4666 | NDUFB7   | 8.527806374 | Tumor_G1 |
| 4667 | CYC1     | 6.701106572 | Tumor_G1 |
| 4668 | ETFB     | 4.547786377 | Tumor_G1 |
| 4669 | UQCR10   | 7.456281541 | Tumor_G1 |
| 4670 | UQCRQ    | 7.266919766 | Tumor_G1 |
| 4671 | UQCC3    | 4.202639234 | Tumor_G1 |
| 4672 | COX15    | 4.192935433 | Tumor_G1 |
| 4673 | COX5A    | 6.840950052 | Tumor_G1 |
| 4674 | COX6B1   | 8.812807271 | Tumor_G1 |
| 4675 | COX6C    | 6.51772723  | Tumor_G1 |
| 4676 | COX7A2   | 6.83257024  | Tumor_G1 |
| 4677 | COX7B    | 5.864703641 | Tumor_G1 |
| 4678 | COX8A    | 8.768900432 | Tumor_G1 |

|      |          |             |          |
|------|----------|-------------|----------|
| 4679 | SCO1     | 2.500537117 | Tumor_G1 |
| 4680 | SURF1    | 6.151947235 | Tumor_G1 |
| 4681 | ATP6V1E1 | 6.699537525 | Tumor_G1 |
| 4682 | DLAT     | 4.299345662 | Tumor_G1 |
| 4683 | PDC      | 0.132770309 | Tumor_G1 |
| 4684 | SUCLG2   | 5.564536503 | Tumor_G1 |
| 4685 | SLC25A5  | 7.773710233 | Tumor_G1 |
| 4686 | UCP2     | 6.66186215  | Tumor_G1 |
| 4687 | SOD2     | 4.934595191 | Tumor_G1 |
| 4688 | NOX4     | 2.628141904 | Tumor_G1 |
| 4689 | DUOX1    | 5.005192974 | Tumor_G1 |
| 4690 | DUOXA1   | 5.289929332 | Tumor_G1 |
| 4691 | DUOX2    | 4.403985116 | Tumor_G1 |
| 4692 | DUOXA2   | 2.765387365 | Tumor_G1 |
| 4693 | NDUFA1   | 7.720429657 | Tumor_G1 |
| 4694 | NDUFA2   | 6.83139836  | Tumor_G1 |
| 4695 | NDUFA8   | 6.805119805 | Tumor_G1 |
| 4696 | NDUFB1   | 5.335265899 | Tumor_G1 |
| 4697 | NDUFB10  | 7.471419698 | Tumor_G1 |
| 4698 | NDUFB2   | 6.476735583 | Tumor_G1 |
| 4699 | NDUFB3   | 5.652451709 | Tumor_G1 |
| 4700 | NDUFB7   | 8.365125883 | Tumor_G1 |
| 4701 | CYC1     | 6.709961528 | Tumor_G1 |
| 4702 | ETFB     | 4.657208764 | Tumor_G1 |
| 4703 | UQCR10   | 7.420213915 | Tumor_G1 |
| 4704 | UQCRQ    | 6.812471732 | Tumor_G1 |
| 4705 | UQCC3    | 4.531999386 | Tumor_G1 |
| 4706 | COX15    | 4.875443985 | Tumor_G1 |
| 4707 | COX5A    | 6.772073149 | Tumor_G1 |
| 4708 | COX6B1   | 8.52568417  | Tumor_G1 |
| 4709 | COX6C    | 6.213089924 | Tumor_G1 |
| 4710 | COX7A2   | 6.601603856 | Tumor_G1 |
| 4711 | COX7B    | 5.847608956 | Tumor_G1 |
| 4712 | COX8A    | 9.450409891 | Tumor_G1 |
| 4713 | SCO1     | 2.987235109 | Tumor_G1 |
| 4714 | SURF1    | 5.830882945 | Tumor_G1 |
| 4715 | ATP6V1E1 | 6.92877351  | Tumor_G1 |
| 4716 | DLAT     | 4.969407738 | Tumor_G1 |
| 4717 | PDC      | 0           | Tumor_G1 |
| 4718 | SUCLG2   | 6.158962055 | Tumor_G1 |

|      |          |             |          |
|------|----------|-------------|----------|
| 4719 | SLC25A5  | 8.21057303  | Tumor_G1 |
| 4720 | UCP2     | 7.800610146 | Tumor_G1 |
| 4721 | SOD2     | 4.856053599 | Tumor_G1 |
| 4722 | NOX4     | 1.502386152 | Tumor_G1 |
| 4723 | DUOX1    | 6.222816097 | Tumor_G1 |
| 4724 | DUOXA1   | 6.388194049 | Tumor_G1 |
| 4725 | DUOX2    | 6.182980358 | Tumor_G1 |
| 4726 | DUOXA2   | 4.352979477 | Tumor_G1 |
| 4727 | NDUFA1   | 7.955253229 | Tumor_G1 |
| 4728 | NDUFA2   | 6.578181484 | Tumor_G1 |
| 4729 | NDUFA8   | 6.608504478 | Tumor_G1 |
| 4730 | NDUFB1   | 5.767443986 | Tumor_G1 |
| 4731 | NDUFB10  | 7.060110945 | Tumor_G1 |
| 4732 | NDUFB2   | 6.867428585 | Tumor_G1 |
| 4733 | NDUFB3   | 6.255034677 | Tumor_G1 |
| 4734 | NDUFB7   | 8.572212193 | Tumor_G1 |
| 4735 | CYC1     | 6.661403293 | Tumor_G1 |
| 4736 | ETFB     | 4.59952464  | Tumor_G1 |
| 4737 | UQCR10   | 7.511508735 | Tumor_G1 |
| 4738 | UQCRQ    | 7.2425072   | Tumor_G1 |
| 4739 | UQCC3    | 4.014986196 | Tumor_G1 |
| 4740 | COX15    | 4.762484832 | Tumor_G1 |
| 4741 | COX5A    | 6.846159752 | Tumor_G1 |
| 4742 | COX6B1   | 8.295500512 | Tumor_G1 |
| 4743 | COX6C    | 6.194207217 | Tumor_G1 |
| 4744 | COX7A2   | 7.178976698 | Tumor_G1 |
| 4745 | COX7B    | 5.982555417 | Tumor_G1 |
| 4746 | COX8A    | 9.110571231 | Tumor_G1 |
| 4747 | SCO1     | 3.132815113 | Tumor_G1 |
| 4748 | SURF1    | 5.989117299 | Tumor_G1 |
| 4749 | ATP6V1E1 | 6.731010935 | Tumor_G1 |
| 4750 | DLAT     | 5.074705058 | Tumor_G1 |
| 4751 | PDC      | 0.132073716 | Tumor_G1 |
| 4752 | SUCLG2   | 6.211965991 | Tumor_G1 |
| 4753 | SLC25A5  | 7.916746555 | Tumor_G1 |
| 4754 | UCP2     | 7.500366436 | Tumor_G1 |
| 4755 | SOD2     | 4.740495096 | Tumor_G1 |
| 4756 | NOX4     | 0.514168258 | Tumor_G1 |
| 4757 | DUOX1    | 6.161963441 | Tumor_G1 |
| 4758 | DUOXA1   | 6.062998435 | Tumor_G1 |

|      |          |             |          |
|------|----------|-------------|----------|
| 4759 | DUOX2    | 6.441933202 | Tumor_G1 |
| 4760 | DUOXA2   | 4.203503365 | Tumor_G1 |
| 4761 | NDUFA1   | 7.747432562 | Tumor_G1 |
| 4762 | NDUFA2   | 6.953305075 | Tumor_G1 |
| 4763 | NDUFA8   | 7.148547913 | Tumor_G1 |
| 4764 | NDUFB1   | 5.532087259 | Tumor_G1 |
| 4765 | NDUFB10  | 7.37261488  | Tumor_G1 |
| 4766 | NDUFB2   | 6.503187644 | Tumor_G1 |
| 4767 | NDUFB3   | 6.305342561 | Tumor_G1 |
| 4768 | NDUFB7   | 8.840708    | Tumor_G1 |
| 4769 | CYC1     | 6.94935479  | Tumor_G1 |
| 4770 | ETFB     | 4.916455868 | Tumor_G1 |
| 4771 | UQCR10   | 7.673815567 | Tumor_G1 |
| 4772 | UQCRQ    | 7.233363893 | Tumor_G1 |
| 4773 | UQCC3    | 4.181365761 | Tumor_G1 |
| 4774 | COX15    | 4.515658122 | Tumor_G1 |
| 4775 | COX5A    | 6.945607721 | Tumor_G1 |
| 4776 | COX6B1   | 8.693647762 | Tumor_G1 |
| 4777 | COX6C    | 6.392547278 | Tumor_G1 |
| 4778 | COX7A2   | 6.968854387 | Tumor_G1 |
| 4779 | COX7B    | 5.955460204 | Tumor_G1 |
| 4780 | COX8A    | 9.251712042 | Tumor_G1 |
| 4781 | SCO1     | 3.02252295  | Tumor_G1 |
| 4782 | SURF1    | 6.065748517 | Tumor_G1 |
| 4783 | ATP6V1E1 | 7.269135308 | Tumor_G1 |
| 4784 | DLAT     | 5.02609408  | Tumor_G1 |
| 4785 | PDC      | 0.253974174 | Tumor_G1 |
| 4786 | SUCLG2   | 6.354478815 | Tumor_G1 |
| 4787 | SLC25A5  | 8.111713804 | Tumor_G1 |
| 4788 | UCP2     | 7.596407965 | Tumor_G1 |
| 4789 | SOD2     | 4.820953951 | Tumor_G1 |
| 4790 | NOX4     | 3.014703898 | Tumor_G1 |
| 4791 | DUOX1    | 5.65653636  | Tumor_G1 |
| 4792 | DUOXA1   | 6.216996052 | Tumor_G1 |
| 4793 | DUOX2    | 5.835546606 | Tumor_G1 |
| 4794 | DUOXA2   | 3.914359274 | Tumor_G1 |
| 4795 | NDUFA1   | 8.211222161 | Tumor_G1 |
| 4796 | NDUFA2   | 6.662494022 | Tumor_G1 |
| 4797 | NDUFA8   | 7.116294405 | Tumor_G1 |
| 4798 | NDUFB1   | 5.781577721 | Tumor_G1 |



|      |          |             |          |
|------|----------|-------------|----------|
| 4799 | NDUFB10  | 7.224814864 | Tumor_G1 |
| 4800 | NDUFB2   | 6.438990154 | Tumor_G1 |
| 4801 | NDUFB3   | 6.558978826 | Tumor_G1 |
| 4802 | NDUFB7   | 8.451895864 | Tumor_G1 |
| 4803 | CYC1     | 6.742415847 | Tumor_G1 |
| 4804 | ETFB     | 4.812078021 | Tumor_G1 |
| 4805 | UQCR10   | 7.669236712 | Tumor_G1 |
| 4806 | UQCRQ    | 7.318075198 | Tumor_G1 |
| 4807 | UQCC3    | 4.03511629  | Tumor_G1 |
| 4808 | COX15    | 4.835089295 | Tumor_G1 |
| 4809 | COX5A    | 6.842294851 | Tumor_G1 |
| 4810 | COX6B1   | 8.69104545  | Tumor_G1 |
| 4811 | COX6C    | 6.447920859 | Tumor_G1 |
| 4812 | COX7A2   | 6.919248782 | Tumor_G1 |
| 4813 | COX7B    | 6.089130108 | Tumor_G1 |
| 4814 | COX8A    | 8.866980387 | Tumor_G1 |
| 4815 | SCO1     | 3.412092092 | Tumor_G1 |
| 4816 | SURF1    | 6.009047215 | Tumor_G1 |
| 4817 | ATP6V1E1 | 7.047534002 | Tumor_G1 |
| 4818 | DLAT     | 4.977412582 | Tumor_G1 |
| 4819 | PDC      | 0.154139995 | Tumor_G1 |
| 4820 | SUCLG2   | 6.145659919 | Tumor_G1 |
| 4821 | SLC25A5  | 8.370023523 | Tumor_G1 |
| 4822 | UCP2     | 7.474678587 | Tumor_G1 |
| 4823 | SOD2     | 5.732434958 | Tumor_G1 |
| 4824 | NOX4     | 3.500252858 | Tumor_G1 |
| 4825 | DUOX1    | 5.649915708 | Tumor_G1 |
| 4826 | DUOXA1   | 5.943911869 | Tumor_G1 |
| 4827 | DUOX2    | 5.30763069  | Tumor_G1 |
| 4828 | DUOXA2   | 3.814007621 | Tumor_G1 |
| 4829 | NDUFA1   | 7.670023474 | Tumor_G1 |
| 4830 | NDUFA2   | 6.366428376 | Tumor_G1 |
| 4831 | NDUFA8   | 6.743797104 | Tumor_G1 |
| 4832 | NDUFB1   | 5.256580761 | Tumor_G1 |
| 4833 | NDUFB10  | 6.988797156 | Tumor_G1 |
| 4834 | NDUFB2   | 6.225478397 | Tumor_G1 |
| 4835 | NDUFB3   | 6.07134808  | Tumor_G1 |
| 4836 | NDUFB7   | 8.014998882 | Tumor_G1 |
| 4837 | CYC1     | 6.369730023 | Tumor_G1 |
| 4838 | ETFB     | 4.445877103 | Tumor_G1 |

|      |          |             |          |
|------|----------|-------------|----------|
| 4839 | UQCR10   | 7.303797428 | Tumor_G1 |
| 4840 | UQCRQ    | 7.043312534 | Tumor_G1 |
| 4841 | UQCC3    | 3.620670569 | Tumor_G1 |
| 4842 | COX15    | 4.016532055 | Tumor_G1 |
| 4843 | COX5A    | 6.6570157   | Tumor_G1 |
| 4844 | COX6B1   | 8.437698957 | Tumor_G1 |
| 4845 | COX6C    | 6.248041788 | Tumor_G1 |
| 4846 | COX7A2   | 6.612935959 | Tumor_G1 |
| 4847 | COX7B    | 5.832407644 | Tumor_G1 |
| 4848 | COX8A    | 8.522666011 | Tumor_G1 |
| 4849 | SCO1     | 2.596967638 | Tumor_G1 |
| 4850 | SURF1    | 5.61628741  | Tumor_G1 |
| 4851 | ATP6V1E1 | 6.836380949 | Tumor_G1 |
| 4852 | DLAT     | 4.466807558 | Tumor_G1 |
| 4853 | PDC      | 0.044100836 | Tumor_G1 |
| 4854 | SUCLG2   | 5.885599784 | Tumor_G1 |
| 4855 | SLC25A5  | 7.619495309 | Tumor_G1 |
| 4856 | UCP2     | 7.513526035 | Tumor_G1 |
| 4857 | SOD2     | 3.990565856 | Tumor_G1 |
| 4858 | NOX4     | 1.520123642 | Tumor_G1 |
| 4859 | DUOX1    | 5.379419819 | Tumor_G1 |
| 4860 | DUOXA1   | 5.583703    | Tumor_G1 |
| 4861 | DUOX2    | 5.419388011 | Tumor_G1 |
| 4862 | DUOXA2   | 3.938957861 | Tumor_G1 |
| 4863 | NDUFA1   | 7.556247439 | Tumor_G1 |
| 4864 | NDUFA2   | 6.500614724 | Tumor_G1 |
| 4865 | NDUFA8   | 6.627328521 | Tumor_G1 |
| 4866 | NDUFB1   | 5.342782167 | Tumor_G1 |
| 4867 | NDUFB10  | 6.927247388 | Tumor_G1 |
| 4868 | NDUFB2   | 6.356223432 | Tumor_G1 |
| 4869 | NDUFB3   | 6.051792706 | Tumor_G1 |
| 4870 | NDUFB7   | 8.03523945  | Tumor_G1 |
| 4871 | CYC1     | 6.578859621 | Tumor_G1 |
| 4872 | ETFB     | 4.512809275 | Tumor_G1 |
| 4873 | UQCR10   | 7.257695004 | Tumor_G1 |
| 4874 | UQCRQ    | 7.025169666 | Tumor_G1 |
| 4875 | UQCC3    | 3.841498382 | Tumor_G1 |
| 4876 | COX15    | 4.293517542 | Tumor_G1 |
| 4877 | COX5A    | 6.623062357 | Tumor_G1 |
| 4878 | COX6B1   | 8.305815737 | Tumor_G1 |

|      |          |             |          |
|------|----------|-------------|----------|
| 4879 | COX6C    | 5.890830863 | Tumor_G1 |
| 4880 | COX7A2   | 6.590344874 | Tumor_G1 |
| 4881 | COX7B    | 5.724723486 | Tumor_G1 |
| 4882 | COX8A    | 8.768261841 | Tumor_G1 |
| 4883 | SCO1     | 2.864723356 | Tumor_G1 |
| 4884 | SURF1    | 5.659882225 | Tumor_G1 |
| 4885 | ATP6V1E1 | 6.928648657 | Tumor_G1 |
| 4886 | DLAT     | 4.780170394 | Tumor_G1 |
| 4887 | PDC      | 0.184557832 | Tumor_G1 |
| 4888 | SUCLG2   | 5.921190183 | Tumor_G1 |
| 4889 | SLC25A5  | 7.871383794 | Tumor_G1 |
| 4890 | UCP2     | 7.691994701 | Tumor_G1 |
| 4891 | SOD2     | 4.903102537 | Tumor_G1 |
| 4892 | NOX4     | 1.981707419 | Tumor_G1 |
| 4893 | DUOX1    | 5.809561451 | Tumor_G1 |
| 4894 | DUOXA1   | 5.987455865 | Tumor_G1 |
| 4895 | DUOX2    | 5.56698834  | Tumor_G1 |
| 4896 | DUOXA2   | 3.67382258  | Tumor_G1 |
| 4897 | NDUFA1   | 7.784487063 | Tumor_G1 |
| 4898 | NDUFA2   | 6.513796272 | Tumor_G1 |
| 4899 | NDUFA8   | 6.466966231 | Tumor_G1 |
| 4900 | NDUFB1   | 5.417730926 | Tumor_G1 |
| 4901 | NDUFB10  | 7.473209301 | Tumor_G1 |
| 4902 | NDUFB2   | 6.091358228 | Tumor_G1 |
| 4903 | NDUFB3   | 5.864274899 | Tumor_G1 |
| 4904 | NDUFB7   | 8.15687495  | Tumor_G1 |
| 4905 | CYC1     | 6.618232081 | Tumor_G1 |
| 4906 | ETFB     | 4.681146547 | Tumor_G1 |
| 4907 | UQCR10   | 7.287080933 | Tumor_G1 |
| 4908 | UQCRQ    | 7.178393622 | Tumor_G1 |
| 4909 | UQCC3    | 4.142592641 | Tumor_G1 |
| 4910 | COX15    | 4.501944803 | Tumor_G1 |
| 4911 | COX5A    | 7.074120247 | Tumor_G1 |
| 4912 | COX6B1   | 8.442904098 | Tumor_G1 |
| 4913 | COX6C    | 6.224110712 | Tumor_G1 |
| 4914 | COX7A2   | 6.854857117 | Tumor_G1 |
| 4915 | COX7B    | 5.85738769  | Tumor_G1 |
| 4916 | COX8A    | 9.269121985 | Tumor_G1 |
| 4917 | SCO1     | 2.932908669 | Tumor_G1 |
| 4918 | SURF1    | 6.091080382 | Tumor_G1 |

|      |          |             |          |
|------|----------|-------------|----------|
| 4919 | ATP6V1E1 | 6.911762767 | Tumor_G1 |
| 4920 | DLAT     | 4.998053867 | Tumor_G1 |
| 4921 | PDC      | 0.372985054 | Tumor_G1 |
| 4922 | SUCLG2   | 5.92892261  | Tumor_G1 |
| 4923 | SLC25A5  | 8.226790178 | Tumor_G1 |
| 4924 | UCP2     | 8.583314582 | Tumor_G1 |
| 4925 | SOD2     | 5.560722853 | Tumor_G1 |
| 4926 | NOX4     | 3.843869542 | Tumor_G1 |
| 4927 | DUOX1    | 6.83514438  | Tumor_G1 |
| 4928 | DUOXA1   | 7.197823717 | Tumor_G1 |
| 4929 | DUOX2    | 5.851189868 | Tumor_G1 |
| 4930 | DUOXA2   | 3.99434094  | Tumor_G1 |
| 4931 | NDUFA1   | 7.411059124 | Tumor_G1 |
| 4932 | NDUFA2   | 6.276278414 | Tumor_G1 |
| 4933 | NDUFA8   | 6.615745595 | Tumor_G1 |
| 4934 | NDUFB1   | 5.01783222  | Tumor_G1 |
| 4935 | NDUFB10  | 7.171713789 | Tumor_G1 |
| 4936 | NDUFB2   | 6.029177017 | Tumor_G1 |
| 4937 | NDUFB3   | 5.689546856 | Tumor_G1 |
| 4938 | NDUFB7   | 8.313790287 | Tumor_G1 |
| 4939 | CYC1     | 6.556906362 | Tumor_G1 |
| 4940 | ETFB     | 4.778047113 | Tumor_G1 |
| 4941 | UQCR10   | 7.152141306 | Tumor_G1 |
| 4942 | UQCRQ    | 6.782295451 | Tumor_G1 |
| 4943 | UQCC3    | 4.102129489 | Tumor_G1 |
| 4944 | COX15    | 4.552753779 | Tumor_G1 |
| 4945 | COX5A    | 6.67807587  | Tumor_G1 |
| 4946 | COX6B1   | 8.271127237 | Tumor_G1 |
| 4947 | COX6C    | 5.803476872 | Tumor_G1 |
| 4948 | COX7A2   | 6.16957337  | Tumor_G1 |
| 4949 | COX7B    | 5.424301739 | Tumor_G1 |
| 4950 | COX8A    | 8.986234452 | Tumor_G1 |
| 4951 | SCO1     | 3.07069341  | Tumor_G1 |
| 4952 | SURF1    | 6.184821115 | Tumor_G1 |
| 4953 | ATP6V1E1 | 6.538214039 | Tumor_G1 |
| 4954 | DLAT     | 4.642964602 | Tumor_G1 |
| 4955 | PDC      | 0.091876531 | Tumor_G1 |
| 4956 | SUCLG2   | 5.496248167 | Tumor_G1 |
| 4957 | SLC25A5  | 7.752403194 | Tumor_G1 |
| 4958 | UCP2     | 7.841801033 | Tumor_G1 |

|      |          |             |          |
|------|----------|-------------|----------|
| 4959 | SOD2     | 6.800450371 | Tumor_G1 |
| 4960 | NOX4     | 3.32998159  | Tumor_G1 |
| 4961 | DUOX1    | 6.122074715 | Tumor_G1 |
| 4962 | DUOXA1   | 6.450377457 | Tumor_G1 |
| 4963 | DUOX2    | 6.265359834 | Tumor_G1 |
| 4964 | DUOXA2   | 4.150102523 | Tumor_G1 |
| 4965 | NDUFA1   | 7.785043304 | Tumor_G1 |
| 4966 | NDUFA2   | 6.681414941 | Tumor_G1 |
| 4967 | NDUFA8   | 6.617429359 | Tumor_G1 |
| 4968 | NDUFB1   | 5.447699089 | Tumor_G1 |
| 4969 | NDUFB10  | 7.219519058 | Tumor_G1 |
| 4970 | NDUFB2   | 6.222823615 | Tumor_G1 |
| 4971 | NDUFB3   | 5.971356396 | Tumor_G1 |
| 4972 | NDUFB7   | 8.246879715 | Tumor_G1 |
| 4973 | CYC1     | 6.438025885 | Tumor_G1 |
| 4974 | ETFB     | 4.354476793 | Tumor_G1 |
| 4975 | UQCR10   | 7.269093598 | Tumor_G1 |
| 4976 | UQCRQ    | 7.056174688 | Tumor_G1 |
| 4977 | UQCC3    | 4.076658962 | Tumor_G1 |
| 4978 | COX15    | 4.010240054 | Tumor_G1 |
| 4979 | COX5A    | 6.666735824 | Tumor_G1 |
| 4980 | COX6B1   | 8.47926784  | Tumor_G1 |
| 4981 | COX6C    | 6.029663594 | Tumor_G1 |
| 4982 | COX7A2   | 6.548138597 | Tumor_G1 |
| 4983 | COX7B    | 5.752518088 | Tumor_G1 |
| 4984 | COX8A    | 9.143708413 | Tumor_G1 |
| 4985 | SCO1     | 2.595878694 | Tumor_G1 |
| 4986 | SURF1    | 5.937092734 | Tumor_G1 |
| 4987 | ATP6V1E1 | 6.661829873 | Tumor_G1 |
| 4988 | DLAT     | 4.299015166 | Tumor_G1 |
| 4989 | PDC      | 0.127264605 | Tumor_G1 |
| 4990 | SUCLG2   | 5.286666232 | Tumor_G1 |
| 4991 | SLC25A5  | 7.409983114 | Tumor_G1 |
| 4992 | UCP2     | 7.852590807 | Tumor_G1 |
| 4993 | SOD2     | 5.000558851 | Tumor_G1 |
| 4994 | NOX4     | 1.243251574 | Tumor_G1 |
| 4995 | DUOX1    | 5.560959167 | Tumor_G1 |
| 4996 | DUOXA1   | 5.92404136  | Tumor_G1 |
| 4997 | DUOX2    | 5.711963399 | Tumor_G1 |
| 4998 | DUOXA2   | 4.611009966 | Tumor_G1 |

|      |          |             |          |
|------|----------|-------------|----------|
| 4999 | NDUFA1   | 7.551120466 | Tumor_G1 |
| 5000 | NDUFA2   | 6.212403469 | Tumor_G1 |
| 5001 | NDUFA8   | 6.489365509 | Tumor_G1 |
| 5002 | NDUFB1   | 5.143447806 | Tumor_G1 |
| 5003 | NDUFB10  | 6.993018542 | Tumor_G1 |
| 5004 | NDUFB2   | 6.458736868 | Tumor_G1 |
| 5005 | NDUFB3   | 5.890981377 | Tumor_G1 |
| 5006 | NDUFB7   | 8.106926398 | Tumor_G1 |
| 5007 | CYC1     | 6.523215476 | Tumor_G1 |
| 5008 | ETFB     | 4.594683359 | Tumor_G1 |
| 5009 | UQCR10   | 7.009397046 | Tumor_G1 |
| 5010 | UQCRQ    | 6.530341437 | Tumor_G1 |
| 5011 | UQCC3    | 3.970283816 | Tumor_G1 |
| 5012 | COX15    | 4.801656705 | Tumor_G1 |
| 5013 | COX5A    | 6.755294311 | Tumor_G1 |
| 5014 | COX6B1   | 8.069543534 | Tumor_G1 |
| 5015 | COX6C    | 5.9399496   | Tumor_G1 |
| 5016 | COX7A2   | 6.354561949 | Tumor_G1 |
| 5017 | COX7B    | 5.412081213 | Tumor_G1 |
| 5018 | COX8A    | 8.986586127 | Tumor_G1 |
| 5019 | SCO1     | 3.174069069 | Tumor_G1 |
| 5020 | SURF1    | 5.960393028 | Tumor_G1 |
| 5021 | ATP6V1E1 | 6.991160522 | Tumor_G1 |
| 5022 | DLAT     | 5.108111658 | Tumor_G1 |
| 5023 | PDC      | 0.184392074 | Tumor_G1 |
| 5024 | SUCLG2   | 6.273803683 | Tumor_G1 |
| 5025 | SLC25A5  | 8.201330423 | Tumor_G1 |
| 5026 | UCP2     | 7.375923956 | Tumor_G1 |
| 5027 | SOD2     | 5.312512592 | Tumor_G1 |
| 5028 | NOX4     | 0.964077567 | Tumor_G1 |
| 5029 | DUOX1    | 6.205391813 | Tumor_G1 |
| 5030 | DUOXA1   | 6.290186364 | Tumor_G1 |
| 5031 | DUOX2    | 6.131230351 | Tumor_G1 |
| 5032 | DUOXA2   | 3.717142434 | Tumor_G1 |
| 5033 | NDUFA1   | 7.92859567  | Tumor_G1 |
| 5034 | NDUFA2   | 6.964519455 | Tumor_G1 |
| 5035 | NDUFA8   | 6.924290538 | Tumor_G1 |
| 5036 | NDUFB1   | 5.923080387 | Tumor_G1 |
| 5037 | NDUFB10  | 7.290303281 | Tumor_G1 |
| 5038 | NDUFB2   | 6.561155946 | Tumor_G1 |

|      |          |             |          |
|------|----------|-------------|----------|
| 5039 | NDUFB3   | 6.509623019 | Tumor_G1 |
| 5040 | NDUFB7   | 8.360016299 | Tumor_G1 |
| 5041 | CYC1     | 6.749083493 | Tumor_G1 |
| 5042 | ETFB     | 4.726560416 | Tumor_G1 |
| 5043 | UQCR10   | 7.819328449 | Tumor_G1 |
| 5044 | UQCRQ    | 7.593251313 | Tumor_G1 |
| 5045 | UQCC3    | 3.963910283 | Tumor_G1 |
| 5046 | COX15    | 4.626193812 | Tumor_G1 |
| 5047 | COX5A    | 7.444188247 | Tumor_G1 |
| 5048 | COX6B1   | 8.670232716 | Tumor_G1 |
| 5049 | COX6C    | 6.509291099 | Tumor_G1 |
| 5050 | COX7A2   | 7.152737716 | Tumor_G1 |
| 5051 | COX7B    | 6.355845507 | Tumor_G1 |
| 5052 | COX8A    | 9.326227195 | Tumor_G1 |
| 5053 | SCO1     | 3.062094594 | Tumor_G1 |
| 5054 | SURF1    | 5.862523036 | Tumor_G1 |
| 5055 | ATP6V1E1 | 7.478532196 | Tumor_G1 |
| 5056 | DLAT     | 5.465161635 | Tumor_G1 |
| 5057 | PDC      | 0.044549983 | Tumor_G1 |
| 5058 | SUCLG2   | 6.167076647 | Tumor_G1 |
| 5059 | SLC25A5  | 8.401985755 | Tumor_G1 |
| 5060 | UCP2     | 7.923392962 | Tumor_G1 |
| 5061 | SOD2     | 5.606494419 | Tumor_G1 |
| 5062 | NOX4     | 2.16087411  | Tumor_G1 |
| 5063 | DUOX1    | 5.687773538 | Tumor_G1 |
| 5064 | DUOXA1   | 5.725852463 | Tumor_G1 |
| 5065 | DUOX2    | 5.296899507 | Tumor_G1 |
| 5066 | DUOXA2   | 3.474026752 | Tumor_G1 |
| 5067 | NDUFA1   | 7.643345256 | Tumor_G1 |
| 5068 | NDUFA2   | 6.090831245 | Tumor_G1 |
| 5069 | NDUFA8   | 6.752680933 | Tumor_G1 |
| 5070 | NDUFB1   | 5.072699297 | Tumor_G1 |
| 5071 | NDUFB10  | 6.986483096 | Tumor_G1 |
| 5072 | NDUFB2   | 5.898626462 | Tumor_G1 |
| 5073 | NDUFB3   | 6.152575286 | Tumor_G1 |
| 5074 | NDUFB7   | 8.151015545 | Tumor_G1 |
| 5075 | CYC1     | 6.1364175   | Tumor_G1 |
| 5076 | ETFB     | 4.727466302 | Tumor_G1 |
| 5077 | UQCR10   | 7.205024469 | Tumor_G1 |
| 5078 | UQCRQ    | 6.820184593 | Tumor_G1 |

|      |          |             |          |
|------|----------|-------------|----------|
| 5079 | UQCC3    | 3.679702401 | Tumor_G1 |
| 5080 | COX15    | 4.897428708 | Tumor_G1 |
| 5081 | COX5A    | 6.89728505  | Tumor_G1 |
| 5082 | COX6B1   | 8.30687896  | Tumor_G1 |
| 5083 | COX6C    | 5.942665578 | Tumor_G1 |
| 5084 | COX7A2   | 6.52828758  | Tumor_G1 |
| 5085 | COX7B    | 5.93545912  | Tumor_G1 |
| 5086 | COX8A    | 8.433148658 | Tumor_G1 |
| 5087 | SCO1     | 3.59115044  | Tumor_G1 |
| 5088 | SURF1    | 5.851689038 | Tumor_G1 |
| 5089 | ATP6V1E1 | 6.851529417 | Tumor_G1 |
| 5090 | DLAT     | 5.43699985  | Tumor_G1 |
| 5091 | PDC      | 0.213360196 | Tumor_G1 |
| 5092 | SUCLG2   | 5.99741664  | Tumor_G1 |
| 5093 | SLC25A5  | 8.055050459 | Tumor_G1 |
| 5094 | UCP2     | 8.678086912 | Tumor_G1 |
| 5095 | SOD2     | 5.484492795 | Tumor_G1 |
| 5096 | NOX4     | 3.560762109 | Tumor_G1 |
| 5097 | DUOX1    | 6.954962436 | Tumor_G1 |
| 5098 | DUOXA1   | 7.163876097 | Tumor_G1 |
| 5099 | DUOX2    | 7.699150441 | Tumor_G1 |
| 5100 | DUOXA2   | 5.028046108 | Tumor_G1 |
| 5101 | NDUFA1   | 7.812675554 | Tumor_G1 |
| 5102 | NDUFA2   | 6.962723363 | Tumor_G1 |
| 5103 | NDUFA8   | 6.85255881  | Tumor_G1 |
| 5104 | NDUFB1   | 5.411675028 | Tumor_G1 |
| 5105 | NDUFB10  | 7.433127006 | Tumor_G1 |
| 5106 | NDUFB2   | 6.635690608 | Tumor_G1 |
| 5107 | NDUFB3   | 6.176902083 | Tumor_G1 |
| 5108 | NDUFB7   | 8.811165381 | Tumor_G1 |
| 5109 | CYC1     | 6.706937624 | Tumor_G1 |
| 5110 | ETFB     | 4.884520012 | Tumor_G1 |
| 5111 | UQCR10   | 7.675906034 | Tumor_G1 |
| 5112 | UQCRQ    | 7.35859139  | Tumor_G1 |
| 5113 | UQCC3    | 4.238364632 | Tumor_G1 |
| 5114 | COX15    | 4.141579047 | Tumor_G1 |
| 5115 | COX5A    | 7.020042896 | Tumor_G1 |
| 5116 | COX6B1   | 8.939196702 | Tumor_G1 |
| 5117 | COX6C    | 6.412491645 | Tumor_G1 |
| 5118 | COX7A2   | 7.078836085 | Tumor_G1 |



|      |          |             |          |
|------|----------|-------------|----------|
| 5119 | COX7B    | 6.035656218 | Tumor_G1 |
| 5120 | COX8A    | 9.163717993 | Tumor_G1 |
| 5121 | SCO1     | 2.601563116 | Tumor_G1 |
| 5122 | SURF1    | 6.491948987 | Tumor_G1 |
| 5123 | ATP6V1E1 | 7.194092559 | Tumor_G1 |
| 5124 | DLAT     | 4.532893436 | Tumor_G1 |
| 5125 | PDC      | 0.157503827 | Tumor_G1 |
| 5126 | SUCLG2   | 5.729605324 | Tumor_G1 |
| 5127 | SLC25A5  | 7.8825637   | Tumor_G1 |
| 5128 | UCP2     | 8.461179577 | Tumor_G1 |
| 5129 | SOD2     | 4.909657288 | Tumor_G1 |
| 5130 | NOX4     | 2.889579943 | Tumor_G1 |
| 5131 | DUOX1    | 4.89611899  | Tumor_G1 |
| 5132 | DUOXA1   | 5.54641263  | Tumor_G1 |
| 5133 | DUOX2    | 4.694403389 | Tumor_G1 |
| 5134 | DUOXA2   | 3.958378572 | Tumor_G1 |
| 5135 | NDUFA1   | 7.703070906 | Tumor_G1 |
| 5136 | NDUFA2   | 6.541493993 | Tumor_G1 |
| 5137 | NDUFA8   | 6.792087537 | Tumor_G1 |
| 5138 | NDUFB1   | 5.423812987 | Tumor_G1 |
| 5139 | NDUFB10  | 7.091396791 | Tumor_G1 |
| 5140 | NDUFB2   | 6.069056888 | Tumor_G1 |
| 5141 | NDUFB3   | 5.930392504 | Tumor_G1 |
| 5142 | NDUFB7   | 8.285640155 | Tumor_G1 |
| 5143 | CYC1     | 6.53008475  | Tumor_G1 |
| 5144 | ETFB     | 4.467619744 | Tumor_G1 |
| 5145 | UQCR10   | 7.219807901 | Tumor_G1 |
| 5146 | UQCRQ    | 6.926128635 | Tumor_G1 |
| 5147 | UQCC3    | 3.96000207  | Tumor_G1 |
| 5148 | COX15    | 4.413708834 | Tumor_G1 |
| 5149 | COX5A    | 6.957654066 | Tumor_G1 |
| 5150 | COX6B1   | 8.528896309 | Tumor_G1 |
| 5151 | COX6C    | 6.229689632 | Tumor_G1 |
| 5152 | COX7A2   | 6.643604623 | Tumor_G1 |
| 5153 | COX7B    | 5.798465589 | Tumor_G1 |
| 5154 | COX8A    | 8.80348037  | Tumor_G1 |
| 5155 | SCO1     | 2.876598786 | Tumor_G1 |
| 5156 | SURF1    | 6.102612415 | Tumor_G1 |
| 5157 | ATP6V1E1 | 6.892242374 | Tumor_G1 |
| 5158 | DLAT     | 4.839057317 | Tumor_G1 |

|      |          |             |          |
|------|----------|-------------|----------|
| 5159 | PDC      | 0.039481636 | Tumor_G1 |
| 5160 | SUCLG2   | 5.844138628 | Tumor_G1 |
| 5161 | SLC25A5  | 7.981438987 | Tumor_G1 |
| 5162 | UCP2     | 7.845664096 | Tumor_G1 |
| 5163 | SOD2     | 6.423924311 | Tumor_G1 |
| 5164 | NOX4     | 1.924939697 | Tumor_G1 |
| 5165 | DUOX1    | 5.07669612  | Tumor_G1 |
| 5166 | DUOXA1   | 5.236515502 | Tumor_G1 |
| 5167 | DUOX2    | 4.312490617 | Tumor_G1 |
| 5168 | DUOXA2   | 2.623807123 | Tumor_G1 |
| 5169 | NDUFA1   | 7.742419673 | Tumor_G1 |
| 5170 | NDUFA2   | 6.79195542  | Tumor_G1 |
| 5171 | NDUFA8   | 6.877090019 | Tumor_G1 |
| 5172 | NDUFB1   | 5.393396487 | Tumor_G1 |
| 5173 | NDUFB10  | 7.317211345 | Tumor_G1 |
| 5174 | NDUFB2   | 6.086894033 | Tumor_G1 |
| 5175 | NDUFB3   | 5.893376735 | Tumor_G1 |
| 5176 | NDUFB7   | 8.406662348 | Tumor_G1 |
| 5177 | CYC1     | 6.381950954 | Tumor_G1 |
| 5178 | ETFB     | 4.358368221 | Tumor_G1 |
| 5179 | UQCR10   | 7.329215862 | Tumor_G1 |
| 5180 | UQCRQ    | 7.164451583 | Tumor_G1 |
| 5181 | UQCC3    | 4.087127948 | Tumor_G1 |
| 5182 | COX15    | 4.101015667 | Tumor_G1 |
| 5183 | COX5A    | 6.932101936 | Tumor_G1 |
| 5184 | COX6B1   | 8.532929993 | Tumor_G1 |
| 5185 | COX6C    | 6.260041615 | Tumor_G1 |
| 5186 | COX7A2   | 6.642980325 | Tumor_G1 |
| 5187 | COX7B    | 5.712157526 | Tumor_G1 |
| 5188 | COX8A    | 8.89953092  | Tumor_G1 |
| 5189 | SCO1     | 2.422668561 | Tumor_G1 |
| 5190 | SURF1    | 5.992491482 | Tumor_G1 |
| 5191 | ATP6V1E1 | 6.692304044 | Tumor_G1 |
| 5192 | DLAT     | 4.546532039 | Tumor_G1 |
| 5193 | PDC      | 0.046739363 | Tumor_G1 |
| 5194 | SUCLG2   | 5.753199785 | Tumor_G1 |
| 5195 | SLC25A5  | 7.469110494 | Tumor_G1 |
| 5196 | UCP2     | 7.531505759 | Tumor_G1 |
| 5197 | SOD2     | 5.299289839 | Tumor_G1 |
| 5198 | NOX4     | 3.18824907  | Tumor_G1 |

|      |          |             |          |
|------|----------|-------------|----------|
| 5199 | DUOX1    | 4.472609955 | Tumor_G1 |
| 5200 | DUOXA1   | 5.04509794  | Tumor_G1 |
| 5201 | DUOX2    | 4.308996738 | Tumor_G1 |
| 5202 | DUOXA2   | 3.010897709 | Tumor_G1 |
| 5203 | NDUFA1   | 7.854807599 | Tumor_G1 |
| 5204 | NDUFA2   | 6.621182237 | Tumor_G1 |
| 5205 | NDUFA8   | 6.975209474 | Tumor_G1 |
| 5206 | NDUFB1   | 5.537874805 | Tumor_G1 |
| 5207 | NDUFB10  | 7.534525898 | Tumor_G1 |
| 5208 | NDUFB2   | 6.770885846 | Tumor_G1 |
| 5209 | NDUFB3   | 6.346966236 | Tumor_G1 |
| 5210 | NDUFB7   | 8.063349724 | Tumor_G1 |
| 5211 | CYC1     | 6.977454004 | Tumor_G1 |
| 5212 | ETFB     | 4.370114    | Tumor_G1 |
| 5213 | UQCR10   | 7.30233331  | Tumor_G1 |
| 5214 | UQCRQ    | 7.053629159 | Tumor_G1 |
| 5215 | UQCC3    | 4.397138178 | Tumor_G1 |
| 5216 | COX15    | 5.437662009 | Tumor_G1 |
| 5217 | COX5A    | 7.815289068 | Tumor_G1 |
| 5218 | COX6B1   | 8.743655144 | Tumor_G1 |
| 5219 | COX6C    | 6.449733096 | Tumor_G1 |
| 5220 | COX7A2   | 7.006400989 | Tumor_G1 |
| 5221 | COX7B    | 6.134565064 | Tumor_G1 |
| 5222 | COX8A    | 9.021999584 | Tumor_G1 |
| 5223 | SCO1     | 3.954103731 | Tumor_G1 |
| 5224 | SURF1    | 6.470824198 | Tumor_G1 |
| 5225 | ATP6V1E1 | 6.879304719 | Tumor_G1 |
| 5226 | DLAT     | 6.182478159 | Tumor_G1 |
| 5227 | PDC      | 0.202718966 | Tumor_G1 |
| 5228 | SUCLG2   | 6.951185385 | Tumor_G1 |
| 5229 | SLC25A5  | 9.143502453 | Tumor_G1 |
| 5230 | UCP2     | 5.731734854 | Tumor_G1 |
| 5231 | SOD2     | 5.823244983 | Tumor_G1 |
| 5232 | NOX4     | 0.621515827 | Tumor_G1 |
| 5233 | DUOX1    | 5.358294869 | Tumor_G1 |
| 5234 | DUOXA1   | 5.4875297   | Tumor_G1 |
| 5235 | DUOX2    | 4.747781185 | Tumor_G1 |
| 5236 | DUOXA2   | 2.21361782  | Tumor_G1 |
| 5237 | NDUFA1   | 7.975382344 | Tumor_G1 |
| 5238 | NDUFA2   | 6.72151817  | Tumor_G1 |

|      |          |             |          |
|------|----------|-------------|----------|
| 5239 | NDUFA8   | 6.795728542 | Tumor_G1 |
| 5240 | NDUFB1   | 5.455630006 | Tumor_G1 |
| 5241 | NDUFB10  | 7.51123957  | Tumor_G1 |
| 5242 | NDUFB2   | 6.697082098 | Tumor_G1 |
| 5243 | NDUFB3   | 6.310330596 | Tumor_G1 |
| 5244 | NDUFB7   | 8.517460305 | Tumor_G1 |
| 5245 | CYC1     | 6.720152527 | Tumor_G1 |
| 5246 | ETFB     | 4.408443703 | Tumor_G1 |
| 5247 | UQCR10   | 7.46072866  | Tumor_G1 |
| 5248 | UQCRQ    | 7.340005779 | Tumor_G1 |
| 5249 | UQCC3    | 4.164109631 | Tumor_G1 |
| 5250 | COX15    | 4.270518859 | Tumor_G1 |
| 5251 | COX5A    | 7.181863833 | Tumor_G1 |
| 5252 | COX6B1   | 8.745234215 | Tumor_G1 |
| 5253 | COX6C    | 6.241148403 | Tumor_G1 |
| 5254 | COX7A2   | 6.888374469 | Tumor_G1 |
| 5255 | COX7B    | 5.864759919 | Tumor_G1 |
| 5256 | COX8A    | 9.356206202 | Tumor_G1 |
| 5257 | SCO1     | 2.871094218 | Tumor_G1 |
| 5258 | SURF1    | 5.738503148 | Tumor_G1 |
| 5259 | ATP6V1E1 | 6.860678934 | Tumor_G1 |
| 5260 | DLAT     | 4.780461281 | Tumor_G1 |
| 5261 | PDC      | 0.128660621 | Tumor_G1 |
| 5262 | SUCLG2   | 5.83653455  | Tumor_G1 |
| 5263 | SLC25A5  | 7.882676542 | Tumor_G1 |
| 5264 | UCP2     | 8.006987057 | Tumor_G1 |
| 5265 | SOD2     | 5.195773467 | Tumor_G1 |
| 5266 | NOX4     | 2.284626176 | Tumor_G1 |
| 5267 | DUOX1    | 5.436028641 | Tumor_G1 |
| 5268 | DUOXA1   | 5.480857925 | Tumor_G1 |
| 5269 | DUOX2    | 4.855079663 | Tumor_G1 |
| 5270 | DUOXA2   | 3.748224329 | Tumor_G1 |
| 5271 | NDUFA1   | 7.616367681 | Tumor_G1 |
| 5272 | NDUFA2   | 6.387172941 | Tumor_G1 |
| 5273 | NDUFA8   | 6.500708627 | Tumor_G1 |
| 5274 | NDUFB1   | 5.451608435 | Tumor_G1 |
| 5275 | NDUFB10  | 7.034211963 | Tumor_G1 |
| 5276 | NDUFB2   | 6.200573501 | Tumor_G1 |
| 5277 | NDUFB3   | 6.122524912 | Tumor_G1 |
| 5278 | NDUFB7   | 8.264302551 | Tumor_G1 |

|      |          |             |          |
|------|----------|-------------|----------|
| 5279 | CYC1     | 6.452749808 | Tumor_G1 |
| 5280 | ETFB     | 4.649328057 | Tumor_G1 |
| 5281 | UQCR10   | 7.143423985 | Tumor_G1 |
| 5282 | UQCRQ    | 6.93927729  | Tumor_G1 |
| 5283 | UQCC3    | 3.991501576 | Tumor_G1 |
| 5284 | COX15    | 4.680200709 | Tumor_G1 |
| 5285 | COX5A    | 6.8906847   | Tumor_G1 |
| 5286 | COX6B1   | 8.232405654 | Tumor_G1 |
| 5287 | COX6C    | 6.05342021  | Tumor_G1 |
| 5288 | COX7A2   | 6.505579493 | Tumor_G1 |
| 5289 | COX7B    | 5.707558236 | Tumor_G1 |
| 5290 | COX8A    | 9.052700889 | Tumor_G1 |
| 5291 | SCO1     | 3.194896644 | Tumor_G1 |
| 5292 | SURF1    | 5.901391359 | Tumor_G1 |
| 5293 | ATP6V1E1 | 6.942495761 | Tumor_G1 |
| 5294 | DLAT     | 4.97253218  | Tumor_G1 |
| 5295 | PDC      | 0.226357463 | Tumor_G1 |
| 5296 | SUCLG2   | 5.992455519 | Tumor_G1 |
| 5297 | SLC25A5  | 8.141304559 | Tumor_G1 |
| 5298 | UCP2     | 8.118298682 | Tumor_G1 |
| 5299 | SOD2     | 5.214404574 | Tumor_G1 |
| 5300 | NOX4     | 2.453564058 | Tumor_G1 |
| 5301 | DUOX1    | 6.01872489  | Tumor_G1 |
| 5302 | DUOXA1   | 6.011354338 | Tumor_G1 |
| 5303 | DUOX2    | 5.266585822 | Tumor_G1 |
| 5304 | DUOXA2   | 3.446080911 | Tumor_G1 |
| 5305 | NDUFA1   | 8.099626962 | Tumor_G1 |
| 5306 | NDUFA2   | 6.728776613 | Tumor_G1 |
| 5307 | NDUFA8   | 6.834312925 | Tumor_G1 |
| 5308 | NDUFB1   | 5.895490397 | Tumor_G1 |
| 5309 | NDUFB10  | 7.106666972 | Tumor_G1 |
| 5310 | NDUFB2   | 5.360160209 | Tumor_G1 |
| 5311 | NDUFB3   | 4.581148646 | Tumor_G1 |
| 5312 | NDUFB7   | 8.499748151 | Tumor_G1 |
| 5313 | CYC1     | 5.745041037 | Tumor_G1 |
| 5314 | ETFB     | 4.032465287 | Tumor_G1 |
| 5315 | UQCR10   | 5.995687044 | Tumor_G1 |
| 5316 | UQCRQ    | 7.055122506 | Tumor_G1 |
| 5317 | UQCC3    | 4.1375752   | Tumor_G1 |
| 5318 | COX15    | 3.390387671 | Tumor_G1 |

|      |          |             |          |
|------|----------|-------------|----------|
| 5319 | COX5A    | 6.553347523 | Tumor_G1 |
| 5320 | COX6B1   | 8.657110624 | Tumor_G1 |
| 5321 | COX6C    | 6.275603621 | Tumor_G1 |
| 5322 | COX7A2   | 6.22177781  | Tumor_G1 |
| 5323 | COX7B    | 5.469459956 | Tumor_G1 |
| 5324 | COX8A    | 9.110886701 | Tumor_G1 |
| 5325 | SCO1     | 1.476141809 | Tumor_G1 |
| 5326 | SURF1    | 5.383839253 | Tumor_G1 |
| 5327 | ATP6V1E1 | 5.019534934 | Tumor_G1 |
| 5328 | DLAT     | 2.826123815 | Tumor_G1 |
| 5329 | PDC      | 0           | Tumor_G1 |
| 5330 | SUCLG2   | 4.615577391 | Tumor_G1 |
| 5331 | SLC25A5  | 5.680903441 | Tumor_G1 |
| 5332 | UCP2     | 7.26852656  | Tumor_G1 |
| 5333 | SOD2     | 2.673847819 | Tumor_G1 |
| 5334 | NOX4     | 1.466653033 | Tumor_G1 |
| 5335 | DUOX1    | 5.267619636 | Tumor_G1 |
| 5336 | DUOXA1   | 5.060708057 | Tumor_G1 |
| 5337 | DUOX2    | 5.658324437 | Tumor_G1 |
| 5338 | DUOXA2   | 4.774344035 | Tumor_G1 |
| 5339 | NDUFA1   | 7.598393714 | Tumor_G1 |
| 5340 | NDUFA2   | 6.469394577 | Tumor_G1 |
| 5341 | NDUFA8   | 6.777709173 | Tumor_G1 |
| 5342 | NDUFB1   | 5.403435487 | Tumor_G1 |
| 5343 | NDUFB10  | 7.311228677 | Tumor_G1 |
| 5344 | NDUFB2   | 6.319567078 | Tumor_G1 |
| 5345 | NDUFB3   | 5.857451134 | Tumor_G1 |
| 5346 | NDUFB7   | 8.347092639 | Tumor_G1 |
| 5347 | CYC1     | 6.414157303 | Tumor_G1 |
| 5348 | ETFB     | 4.597788379 | Tumor_G1 |
| 5349 | UQCR10   | 7.175835314 | Tumor_G1 |
| 5350 | UQCRQ    | 7.04422578  | Tumor_G1 |
| 5351 | UQCC3    | 3.763498935 | Tumor_G1 |
| 5352 | COX15    | 4.415884913 | Tumor_G1 |
| 5353 | COX5A    | 6.835902672 | Tumor_G1 |
| 5354 | COX6B1   | 8.300207188 | Tumor_G1 |
| 5355 | COX6C    | 6.229823139 | Tumor_G1 |
| 5356 | COX7A2   | 6.540959617 | Tumor_G1 |
| 5357 | COX7B    | 5.694286345 | Tumor_G1 |
| 5358 | COX8A    | 8.941314226 | Tumor_G1 |

|      |          |             |          |
|------|----------|-------------|----------|
| 5359 | SCO1     | 2.830663003 | Tumor_G1 |
| 5360 | SURF1    | 6.023504361 | Tumor_G1 |
| 5361 | ATP6V1E1 | 7.05540364  | Tumor_G1 |
| 5362 | DLAT     | 4.472975809 | Tumor_G1 |
| 5363 | PDC      | 0.053095957 | Tumor_G1 |
| 5364 | SUCLG2   | 6.059168634 | Tumor_G1 |
| 5365 | SLC25A5  | 7.554099168 | Tumor_G1 |
| 5366 | UCP2     | 8.639288863 | Tumor_G1 |
| 5367 | SOD2     | 5.108208662 | Tumor_G1 |
| 5368 | NOX4     | 2.022632318 | Tumor_G1 |
| 5369 | DUOX1    | 6.169792482 | Tumor_G1 |
| 5370 | DUOXA1   | 6.343892221 | Tumor_G1 |
| 5371 | DUOX2    | 5.758566613 | Tumor_G1 |
| 5372 | DUOXA2   | 3.820611093 | Tumor_G1 |
| 5373 | NDUFA1   | 7.616305945 | Tumor_G1 |
| 5374 | NDUFA2   | 6.586621549 | Tumor_G1 |
| 5375 | NDUFA8   | 7.061550146 | Tumor_G1 |
| 5376 | NDUFB1   | 5.352152411 | Tumor_G1 |
| 5377 | NDUFB10  | 7.196560806 | Tumor_G1 |
| 5378 | NDUFB2   | 6.153619666 | Tumor_G1 |
| 5379 | NDUFB3   | 5.783015293 | Tumor_G1 |
| 5380 | NDUFB7   | 8.167790951 | Tumor_G1 |
| 5381 | CYC1     | 6.796075273 | Tumor_G1 |
| 5382 | ETFB     | 4.929436678 | Tumor_G1 |
| 5383 | UQCR10   | 6.641368382 | Tumor_G1 |
| 5384 | UQCRQ    | 7.125816383 | Tumor_G1 |
| 5385 | UQCC3    | 4.099686586 | Tumor_G1 |
| 5386 | COX15    | 4.717450575 | Tumor_G1 |
| 5387 | COX5A    | 6.906575181 | Tumor_G1 |
| 5388 | COX6B1   | 8.462266089 | Tumor_G1 |
| 5389 | COX6C    | 6.26233841  | Tumor_G1 |
| 5390 | COX7A2   | 6.80784898  | Tumor_G1 |
| 5391 | COX7B    | 5.798100791 | Tumor_G1 |
| 5392 | COX8A    | 9.278710719 | Tumor_G1 |
| 5393 | SCO1     | 2.769472191 | Tumor_G1 |
| 5394 | SURF1    | 5.682315673 | Tumor_G1 |
| 5395 | ATP6V1E1 | 6.084171164 | Tumor_G1 |
| 5396 | DLAT     | 5.291527075 | Tumor_G1 |
| 5397 | PDC      | 0.357384513 | Tumor_G1 |
| 5398 | SUCLG2   | 6.539186194 | Tumor_G1 |

|      |          |             |          |
|------|----------|-------------|----------|
| 5399 | SLC25A5  | 7.421065747 | Tumor_G1 |
| 5400 | UCP2     | 7.920127345 | Tumor_G1 |
| 5401 | SOD2     | 3.639486717 | Tumor_G1 |
| 5402 | NOX4     | 0.932459212 | Tumor_G1 |
| 5403 | DUOX1    | 6.68265687  | Tumor_G1 |
| 5404 | DUOXA1   | 6.42478242  | Tumor_G1 |
| 5405 | DUOX2    | 7.777825645 | Tumor_G1 |
| 5406 | DUOXA2   | 5.026858167 | Tumor_G1 |
| 5407 | NDUFA1   | 7.767690778 | Tumor_G1 |
| 5408 | NDUFA2   | 6.586101182 | Tumor_G1 |
| 5409 | NDUFA8   | 6.910691714 | Tumor_G1 |
| 5410 | NDUFB1   | 5.686643646 | Tumor_G1 |
| 5411 | NDUFB10  | 7.45741785  | Tumor_G1 |
| 5412 | NDUFB2   | 6.773587177 | Tumor_G1 |
| 5413 | NDUFB3   | 5.762688094 | Tumor_G1 |
| 5414 | NDUFB7   | 8.246872568 | Tumor_G1 |
| 5415 | CYC1     | 6.473940792 | Tumor_G1 |
| 5416 | ETFB     | 4.518874876 | Tumor_G1 |
| 5417 | UQCR10   | 7.496210592 | Tumor_G1 |
| 5418 | UQCRQ    | 7.220962083 | Tumor_G1 |
| 5419 | UQCC3    | 3.852749239 | Tumor_G1 |
| 5420 | COX15    | 4.190621703 | Tumor_G1 |
| 5421 | COX5A    | 7.050657545 | Tumor_G1 |
| 5422 | COX6B1   | 8.395155264 | Tumor_G1 |
| 5423 | COX6C    | 6.286314681 | Tumor_G1 |
| 5424 | COX7A2   | 6.525192383 | Tumor_G1 |
| 5425 | COX7B    | 5.764185419 | Tumor_G1 |
| 5426 | COX8A    | 8.874663848 | Tumor_G1 |
| 5427 | SCO1     | 2.65849255  | Tumor_G1 |
| 5428 | SURF1    | 6.286634487 | Tumor_G1 |
| 5429 | ATP6V1E1 | 6.610008566 | Tumor_G1 |
| 5430 | DLAT     | 4.430865316 | Tumor_G1 |
| 5431 | PDC      | 0           | Tumor_G1 |
| 5432 | SUCLG2   | 5.830533254 | Tumor_G1 |
| 5433 | SLC25A5  | 7.47590702  | Tumor_G1 |
| 5434 | UCP2     | 7.802077115 | Tumor_G1 |
| 5435 | SOD2     | 4.988628534 | Tumor_G1 |
| 5436 | NOX4     | 0.854870675 | Tumor_G1 |
| 5437 | DUOX1    | 6.140079346 | Tumor_G1 |
| 5438 | DUOXA1   | 5.829975503 | Tumor_G1 |



|      |          |             |          |
|------|----------|-------------|----------|
| 5439 | DUOX2    | 7.121521651 | Tumor_G1 |
| 5440 | DUOXA2   | 6.017476407 | Tumor_G1 |
| 5441 | NDUFA1   | 7.888825622 | Tumor_G1 |
| 5442 | NDUFA2   | 7.140251938 | Tumor_G1 |
| 5443 | NDUFA8   | 7.042514407 | Tumor_G1 |
| 5444 | NDUFB1   | 5.903704741 | Tumor_G1 |
| 5445 | NDUFB10  | 7.668296882 | Tumor_G1 |
| 5446 | NDUFB2   | 6.450005531 | Tumor_G1 |
| 5447 | NDUFB3   | 6.258964478 | Tumor_G1 |
| 5448 | NDUFB7   | 8.754031572 | Tumor_G1 |
| 5449 | CYC1     | 6.925618789 | Tumor_G1 |
| 5450 | ETFB     | 5.096223618 | Tumor_G1 |
| 5451 | UQCR10   | 7.638214611 | Tumor_G1 |
| 5452 | UQCRQ    | 7.648090087 | Tumor_G1 |
| 5453 | UQCC3    | 4.376613785 | Tumor_G1 |
| 5454 | COX15    | 4.141371953 | Tumor_G1 |
| 5455 | COX5A    | 7.344012664 | Tumor_G1 |
| 5456 | COX6B1   | 8.972978948 | Tumor_G1 |
| 5457 | COX6C    | 6.494749772 | Tumor_G1 |
| 5458 | COX7A2   | 6.955442847 | Tumor_G1 |
| 5459 | COX7B    | 6.028273447 | Tumor_G1 |
| 5460 | COX8A    | 8.993964818 | Tumor_G1 |
| 5461 | SCO1     | 2.503608262 | Tumor_G1 |
| 5462 | SURF1    | 6.402441588 | Tumor_G1 |
| 5463 | ATP6V1E1 | 7.122392284 | Tumor_G1 |
| 5464 | DLAT     | 4.497843635 | Tumor_G1 |
| 5465 | PDC      | 0.127019646 | Tumor_G1 |
| 5466 | SUCLG2   | 6.241252151 | Tumor_G1 |
| 5467 | SLC25A5  | 7.864255636 | Tumor_G1 |
| 5468 | UCP2     | 7.690509346 | Tumor_G1 |
| 5469 | SOD2     | 5.447387393 | Tumor_G1 |
| 5470 | NOX4     | 3.203618163 | Tumor_G1 |
| 5471 | DUOX1    | 5.542459466 | Tumor_G1 |
| 5472 | DUOXA1   | 5.760808304 | Tumor_G1 |
| 5473 | DUOX2    | 3.90546913  | Tumor_G1 |
| 5474 | DUOXA2   | 2.629259206 | Tumor_G1 |
| 5475 | NDUFA1   | 7.278917966 | Tumor_G1 |
| 5476 | NDUFA2   | 6.058548793 | Tumor_G1 |
| 5477 | NDUFA8   | 6.448854592 | Tumor_G1 |
| 5478 | NDUFB1   | 4.884111243 | Tumor_G1 |

|      |          |             |          |
|------|----------|-------------|----------|
| 5479 | NDUFB10  | 6.789176597 | Tumor_G1 |
| 5480 | NDUFB2   | 5.857611732 | Tumor_G1 |
| 5481 | NDUFB3   | 5.900424362 | Tumor_G1 |
| 5482 | NDUFB7   | 7.991650507 | Tumor_G1 |
| 5483 | CYC1     | 6.433001963 | Tumor_G1 |
| 5484 | ETFB     | 4.259493956 | Tumor_G1 |
| 5485 | UQCR10   | 6.988939236 | Tumor_G1 |
| 5486 | UQCRQ    | 6.715501962 | Tumor_G1 |
| 5487 | UQCC3    | 3.450860868 | Tumor_G1 |
| 5488 | COX15    | 4.565841496 | Tumor_G1 |
| 5489 | COX5A    | 6.817016004 | Tumor_G1 |
| 5490 | COX6B1   | 8.100513094 | Tumor_G1 |
| 5491 | COX6C    | 5.830358737 | Tumor_G1 |
| 5492 | COX7A2   | 6.420290176 | Tumor_G1 |
| 5493 | COX7B    | 5.500341992 | Tumor_G1 |
| 5494 | COX8A    | 8.746105647 | Tumor_G1 |
| 5495 | SCO1     | 2.809028551 | Tumor_G1 |
| 5496 | SURF1    | 5.45113574  | Tumor_G1 |
| 5497 | ATP6V1E1 | 7.314830212 | Tumor_G1 |
| 5498 | DLAT     | 5.029961519 | Tumor_G1 |
| 5499 | PDC      | 0.217213171 | Tumor_G1 |
| 5500 | SUCLG2   | 6.260660426 | Tumor_G1 |
| 5501 | SLC25A5  | 8.140426499 | Tumor_G1 |
| 5502 | UCP2     | 8.81183997  | Tumor_G1 |
| 5503 | SOD2     | 5.90459313  | Tumor_G1 |
| 5504 | NOX4     | 2.500188871 | Tumor_G1 |
| 5505 | DUOX1    | 5.680339333 | Tumor_G1 |
| 5506 | DUOXA1   | 5.945993448 | Tumor_G1 |
| 5507 | DUOX2    | 6.132804101 | Tumor_G1 |
| 5508 | DUOXA2   | 3.097674842 | Tumor_G1 |
| 5509 | NDUFA1   | 8.132588998 | Tumor_G2 |
| 5510 | NDUFA2   | 7.113687329 | Tumor_G2 |
| 5511 | NDUFA8   | 7.373156954 | Tumor_G2 |
| 5512 | NDUFB1   | 5.98396003  | Tumor_G2 |
| 5513 | NDUFB10  | 8.168727046 | Tumor_G2 |
| 5514 | NDUFB2   | 7.251992448 | Tumor_G2 |
| 5515 | NDUFB3   | 6.229551563 | Tumor_G2 |
| 5516 | NDUFB7   | 9.381385843 | Tumor_G2 |
| 5517 | CYC1     | 7.116602709 | Tumor_G2 |
| 5518 | ETFB     | 6.47896645  | Tumor_G2 |

|      |          |             |          |
|------|----------|-------------|----------|
| 5519 | UQCR10   | 8.090370099 | Tumor_G2 |
| 5520 | UQCRQ    | 7.64530386  | Tumor_G2 |
| 5521 | UQCC3    | 5.097788786 | Tumor_G2 |
| 5522 | COX15    | 4.845430038 | Tumor_G2 |
| 5523 | COX5A    | 7.233394841 | Tumor_G2 |
| 5524 | COX6B1   | 9.270308446 | Tumor_G2 |
| 5525 | COX6C    | 6.653507586 | Tumor_G2 |
| 5526 | COX7A2   | 6.945660832 | Tumor_G2 |
| 5527 | COX7B    | 6.3131626   | Tumor_G2 |
| 5528 | COX8A    | 10.32600094 | Tumor_G2 |
| 5529 | SCO1     | 3.249560822 | Tumor_G2 |
| 5530 | SURF1    | 7.157434525 | Tumor_G2 |
| 5531 | ATP6V1E1 | 7.141138126 | Tumor_G2 |
| 5532 | DLAT     | 4.468673756 | Tumor_G2 |
| 5533 | PDC      | 0.057050275 | Tumor_G2 |
| 5534 | SUCLG2   | 5.640150257 | Tumor_G2 |
| 5535 | SLC25A5  | 7.336207836 | Tumor_G2 |
| 5536 | UCP2     | 9.37567875  | Tumor_G2 |
| 5537 | SOD2     | 4.129791131 | Tumor_G2 |
| 5538 | NOX4     | 2.297521126 | Tumor_G2 |
| 5539 | DUOX1    | 7.369753747 | Tumor_G2 |
| 5540 | DUOXA1   | 7.833724558 | Tumor_G2 |
| 5541 | DUOX2    | 7.499120588 | Tumor_G2 |
| 5542 | DUOXA2   | 6.486574208 | Tumor_G2 |
| 5543 | NDUFA1   | 7.861650538 | Tumor_G2 |
| 5544 | NDUFA2   | 6.578312336 | Tumor_G2 |
| 5545 | NDUFA8   | 7.15017338  | Tumor_G2 |
| 5546 | NDUFB1   | 5.837134066 | Tumor_G2 |
| 5547 | NDUFB10  | 7.828616494 | Tumor_G2 |
| 5548 | NDUFB2   | 6.617200417 | Tumor_G2 |
| 5549 | NDUFB3   | 6.22211683  | Tumor_G2 |
| 5550 | NDUFB7   | 8.734161756 | Tumor_G2 |
| 5551 | CYC1     | 6.774602896 | Tumor_G2 |
| 5552 | ETFB     | 5.193138799 | Tumor_G2 |
| 5553 | UQCR10   | 7.580819917 | Tumor_G2 |
| 5554 | UQCRQ    | 7.159016241 | Tumor_G2 |
| 5555 | UQCC3    | 4.752203607 | Tumor_G2 |
| 5556 | COX15    | 4.888395445 | Tumor_G2 |
| 5557 | COX5A    | 7.228350602 | Tumor_G2 |
| 5558 | COX6B1   | 8.88962446  | Tumor_G2 |

|      |          |             |          |
|------|----------|-------------|----------|
| 5559 | COX6C    | 6.445280124 | Tumor_G2 |
| 5560 | COX7A2   | 6.690768941 | Tumor_G2 |
| 5561 | COX7B    | 5.884120946 | Tumor_G2 |
| 5562 | COX8A    | 9.440231863 | Tumor_G2 |
| 5563 | SCO1     | 3.280826688 | Tumor_G2 |
| 5564 | SURF1    | 6.906536772 | Tumor_G2 |
| 5565 | ATP6V1E1 | 6.927356158 | Tumor_G2 |
| 5566 | DLAT     | 4.727227062 | Tumor_G2 |
| 5567 | PDC      | 0.058348169 | Tumor_G2 |
| 5568 | SUCLG2   | 5.864175752 | Tumor_G2 |
| 5569 | SLC25A5  | 7.435405245 | Tumor_G2 |
| 5570 | UCP2     | 9.613934549 | Tumor_G2 |
| 5571 | SOD2     | 4.807755733 | Tumor_G2 |
| 5572 | NOX4     | 2.116420829 | Tumor_G2 |
| 5573 | DUOX1    | 6.29389832  | Tumor_G2 |
| 5574 | DUOXA1   | 6.967148934 | Tumor_G2 |
| 5575 | DUOX2    | 6.84219408  | Tumor_G2 |
| 5576 | DUOXA2   | 5.228968963 | Tumor_G2 |
| 5577 | NDUFA1   | 8.168082771 | Tumor_G2 |
| 5578 | NDUFA2   | 7.035434935 | Tumor_G2 |
| 5579 | NDUFA8   | 7.227155545 | Tumor_G2 |
| 5580 | NDUFB1   | 5.877247806 | Tumor_G2 |
| 5581 | NDUFB10  | 7.760062455 | Tumor_G2 |
| 5582 | NDUFB2   | 6.736883728 | Tumor_G2 |
| 5583 | NDUFB3   | 6.514844656 | Tumor_G2 |
| 5584 | NDUFB7   | 9.072242372 | Tumor_G2 |
| 5585 | CYC1     | 7.106367249 | Tumor_G2 |
| 5586 | ETFB     | 5.589179309 | Tumor_G2 |
| 5587 | UQCR10   | 7.922693367 | Tumor_G2 |
| 5588 | UQCRQ    | 7.535468563 | Tumor_G2 |
| 5589 | UQCC3    | 5.250132709 | Tumor_G2 |
| 5590 | COX15    | 4.758726139 | Tumor_G2 |
| 5591 | COX5A    | 7.296520955 | Tumor_G2 |
| 5592 | COX6B1   | 8.926897685 | Tumor_G2 |
| 5593 | COX6C    | 6.706239155 | Tumor_G2 |
| 5594 | COX7A2   | 6.982399602 | Tumor_G2 |
| 5595 | COX7B    | 6.092568923 | Tumor_G2 |
| 5596 | COX8A    | 9.832905945 | Tumor_G2 |
| 5597 | SCO1     | 3.333036164 | Tumor_G2 |
| 5598 | SURF1    | 6.792642469 | Tumor_G2 |

|      |          |             |          |
|------|----------|-------------|----------|
| 5599 | ATP6V1E1 | 6.968074013 | Tumor_G2 |
| 5600 | DLAT     | 4.663733227 | Tumor_G2 |
| 5601 | PDC      | 0.124881583 | Tumor_G2 |
| 5602 | SUCLG2   | 5.883313101 | Tumor_G2 |
| 5603 | SLC25A5  | 7.738760767 | Tumor_G2 |
| 5604 | UCP2     | 8.742282911 | Tumor_G2 |
| 5605 | SOD2     | 4.562698701 | Tumor_G2 |
| 5606 | NOX4     | 2.438020212 | Tumor_G2 |
| 5607 | DUOX1    | 6.420586454 | Tumor_G2 |
| 5608 | DUOXA1   | 6.900076122 | Tumor_G2 |
| 5609 | DUOX2    | 7.051029998 | Tumor_G2 |
| 5610 | DUOXA2   | 5.190984641 | Tumor_G2 |
| 5611 | NDUFA1   | 7.603315402 | Tumor_G2 |
| 5612 | NDUFA2   | 6.636753158 | Tumor_G2 |
| 5613 | NDUFA8   | 6.92190321  | Tumor_G2 |
| 5614 | NDUFB1   | 5.491374095 | Tumor_G2 |
| 5615 | NDUFB10  | 7.465944233 | Tumor_G2 |
| 5616 | NDUFB2   | 6.466408723 | Tumor_G2 |
| 5617 | NDUFB3   | 6.177080509 | Tumor_G2 |
| 5618 | NDUFB7   | 8.481183284 | Tumor_G2 |
| 5619 | CYC1     | 6.82761484  | Tumor_G2 |
| 5620 | ETFB     | 5.079749739 | Tumor_G2 |
| 5621 | UQCR10   | 7.402510399 | Tumor_G2 |
| 5622 | UQCRQ    | 7.12136546  | Tumor_G2 |
| 5623 | UQCC3    | 4.496373264 | Tumor_G2 |
| 5624 | COX15    | 5.006436775 | Tumor_G2 |
| 5625 | COX5A    | 7.090564904 | Tumor_G2 |
| 5626 | COX6B1   | 8.549585987 | Tumor_G2 |
| 5627 | COX6C    | 6.112977919 | Tumor_G2 |
| 5628 | COX7A2   | 6.710938195 | Tumor_G2 |
| 5629 | COX7B    | 5.865488999 | Tumor_G2 |
| 5630 | COX8A    | 9.40061668  | Tumor_G2 |
| 5631 | SCO1     | 3.623975122 | Tumor_G2 |
| 5632 | SURF1    | 6.440574311 | Tumor_G2 |
| 5633 | ATP6V1E1 | 6.870813957 | Tumor_G2 |
| 5634 | DLAT     | 5.101688001 | Tumor_G2 |
| 5635 | PDC      | 0.073413686 | Tumor_G2 |
| 5636 | SUCLG2   | 5.954959223 | Tumor_G2 |
| 5637 | SLC25A5  | 8.420886066 | Tumor_G2 |
| 5638 | UCP2     | 8.997944289 | Tumor_G2 |

|      |          |             |          |
|------|----------|-------------|----------|
| 5639 | SOD2     | 5.252362549 | Tumor_G2 |
| 5640 | NOX4     | 2.240817021 | Tumor_G2 |
| 5641 | DUOX1    | 6.677132165 | Tumor_G2 |
| 5642 | DUOXA1   | 6.84300236  | Tumor_G2 |
| 5643 | DUOX2    | 6.413293229 | Tumor_G2 |
| 5644 | DUOXA2   | 4.698247789 | Tumor_G2 |
| 5645 | NDUFA1   | 8.239460963 | Tumor_G2 |
| 5646 | NDUFA2   | 7.344963566 | Tumor_G2 |
| 5647 | NDUFA8   | 7.464609578 | Tumor_G2 |
| 5648 | NDUFB1   | 5.649661902 | Tumor_G2 |
| 5649 | NDUFB10  | 7.731530524 | Tumor_G2 |
| 5650 | NDUFB2   | 7.054846163 | Tumor_G2 |
| 5651 | NDUFB3   | 6.50564909  | Tumor_G2 |
| 5652 | NDUFB7   | 8.713594641 | Tumor_G2 |
| 5653 | CYC1     | 7.396659459 | Tumor_G2 |
| 5654 | ETFB     | 5.538011514 | Tumor_G2 |
| 5655 | UQCR10   | 8.070185038 | Tumor_G2 |
| 5656 | UQCRQ    | 7.821461424 | Tumor_G2 |
| 5657 | UQCC3    | 4.345609933 | Tumor_G2 |
| 5658 | COX15    | 4.665192079 | Tumor_G2 |
| 5659 | COX5A    | 6.999726608 | Tumor_G2 |
| 5660 | COX6B1   | 8.365980339 | Tumor_G2 |
| 5661 | COX6C    | 6.440120952 | Tumor_G2 |
| 5662 | COX7A2   | 6.710997084 | Tumor_G2 |
| 5663 | COX7B    | 6.145577121 | Tumor_G2 |
| 5664 | COX8A    | 9.946117968 | Tumor_G2 |
| 5665 | SCO1     | 4.233593496 | Tumor_G2 |
| 5666 | SURF1    | 6.847235581 | Tumor_G2 |
| 5667 | ATP6V1E1 | 6.851233386 | Tumor_G2 |
| 5668 | DLAT     | 4.822222143 | Tumor_G2 |
| 5669 | PDC      | 0.078143425 | Tumor_G2 |
| 5670 | SUCLG2   | 7.09529511  | Tumor_G2 |
| 5671 | SLC25A5  | 8.368543434 | Tumor_G2 |
| 5672 | UCP2     | 8.372271555 | Tumor_G2 |
| 5673 | SOD2     | 4.894669795 | Tumor_G2 |
| 5674 | NOX4     | 1.83485894  | Tumor_G2 |
| 5675 | DUOX1    | 8.405977732 | Tumor_G2 |
| 5676 | DUOXA1   | 7.568114862 | Tumor_G2 |
| 5677 | DUOX2    | 9.749781095 | Tumor_G2 |
| 5678 | DUOXA2   | 7.086416072 | Tumor_G2 |

|      |          |             |          |
|------|----------|-------------|----------|
| 5679 | NDUFA1   | 8.394500839 | Tumor_G2 |
| 5680 | NDUFA2   | 7.331778953 | Tumor_G2 |
| 5681 | NDUFA8   | 7.602619119 | Tumor_G2 |
| 5682 | NDUFB1   | 5.913769738 | Tumor_G2 |
| 5683 | NDUFB10  | 8.069891897 | Tumor_G2 |
| 5684 | NDUFB2   | 6.595436981 | Tumor_G2 |
| 5685 | NDUFB3   | 6.2291513   | Tumor_G2 |
| 5686 | NDUFB7   | 9.001589043 | Tumor_G2 |
| 5687 | CYC1     | 7.217236267 | Tumor_G2 |
| 5688 | ETFB     | 5.290993626 | Tumor_G2 |
| 5689 | UQCR10   | 7.35282444  | Tumor_G2 |
| 5690 | UQCRQ    | 7.520641411 | Tumor_G2 |
| 5691 | UQCC3    | 4.946601224 | Tumor_G2 |
| 5692 | COX15    | 5.341496066 | Tumor_G2 |
| 5693 | COX5A    | 7.305304799 | Tumor_G2 |
| 5694 | COX6B1   | 8.957198432 | Tumor_G2 |
| 5695 | COX6C    | 6.77879591  | Tumor_G2 |
| 5696 | COX7A2   | 6.967141136 | Tumor_G2 |
| 5697 | COX7B    | 6.351644044 | Tumor_G2 |
| 5698 | COX8A    | 10.22545596 | Tumor_G2 |
| 5699 | SCO1     | 3.618180777 | Tumor_G2 |
| 5700 | SURF1    | 7.106225882 | Tumor_G2 |
| 5701 | ATP6V1E1 | 5.89878249  | Tumor_G2 |
| 5702 | DLAT     | 5.016474301 | Tumor_G2 |
| 5703 | PDC      | 0.318575987 | Tumor_G2 |
| 5704 | SUCLG2   | 6.710900999 | Tumor_G2 |
| 5705 | SLC25A5  | 7.894544216 | Tumor_G2 |
| 5706 | UCP2     | 7.704566995 | Tumor_G2 |
| 5707 | SOD2     | 4.883005758 | Tumor_G2 |
| 5708 | NOX4     | 1.664953249 | Tumor_G2 |
| 5709 | DUOX1    | 7.874582402 | Tumor_G2 |
| 5710 | DUOXA1   | 7.388589812 | Tumor_G2 |
| 5711 | DUOX2    | 10.5417359  | Tumor_G2 |
| 5712 | DUOXA2   | 8.492152114 | Tumor_G2 |
| 5713 | NDUFA1   | 8.059500046 | Tumor_G2 |
| 5714 | NDUFA2   | 6.661131313 | Tumor_G2 |
| 5715 | NDUFA8   | 7.181339286 | Tumor_G2 |
| 5716 | NDUFB1   | 5.82130282  | Tumor_G2 |
| 5717 | NDUFB10  | 7.584090935 | Tumor_G2 |
| 5718 | NDUFB2   | 6.460219976 | Tumor_G2 |

|      |          |             |          |
|------|----------|-------------|----------|
| 5719 | NDUFB3   | 6.490649287 | Tumor_G2 |
| 5720 | NDUFB7   | 8.598654901 | Tumor_G2 |
| 5721 | CYC1     | 6.732195028 | Tumor_G2 |
| 5722 | ETFB     | 5.243595125 | Tumor_G2 |
| 5723 | UQCR10   | 7.773255541 | Tumor_G2 |
| 5724 | UQCRQ    | 7.162710256 | Tumor_G2 |
| 5725 | UQCC3    | 4.728133499 | Tumor_G2 |
| 5726 | COX15    | 5.011525914 | Tumor_G2 |
| 5727 | COX5A    | 7.146919553 | Tumor_G2 |
| 5728 | COX6B1   | 8.711021659 | Tumor_G2 |
| 5729 | COX6C    | 6.561003805 | Tumor_G2 |
| 5730 | COX7A2   | 6.874878752 | Tumor_G2 |
| 5731 | COX7B    | 6.041859137 | Tumor_G2 |
| 5732 | COX8A    | 9.403125307 | Tumor_G2 |
| 5733 | SCO1     | 3.528400201 | Tumor_G2 |
| 5734 | SURF1    | 6.635624209 | Tumor_G2 |
| 5735 | ATP6V1E1 | 6.859423442 | Tumor_G2 |
| 5736 | DLAT     | 4.937140923 | Tumor_G2 |
| 5737 | PDC      | 0.127414371 | Tumor_G2 |
| 5738 | SUCLG2   | 6.025732663 | Tumor_G2 |
| 5739 | SLC25A5  | 7.886104614 | Tumor_G2 |
| 5740 | UCP2     | 9.629834559 | Tumor_G2 |
| 5741 | SOD2     | 4.71234983  | Tumor_G2 |
| 5742 | NOX4     | 0.878371266 | Tumor_G2 |
| 5743 | DUOX1    | 6.121250624 | Tumor_G2 |
| 5744 | DUOXA1   | 6.276505411 | Tumor_G2 |
| 5745 | DUOX2    | 7.395924111 | Tumor_G2 |
| 5746 | DUOXA2   | 5.293762336 | Tumor_G2 |
| 5747 | NDUFA1   | 7.981207828 | Tumor_G2 |
| 5748 | NDUFA2   | 6.790845378 | Tumor_G2 |
| 5749 | NDUFA8   | 7.284555412 | Tumor_G2 |
| 5750 | NDUFB1   | 5.809608832 | Tumor_G2 |
| 5751 | NDUFB10  | 7.465386136 | Tumor_G2 |
| 5752 | NDUFB2   | 7.166232381 | Tumor_G2 |
| 5753 | NDUFB3   | 6.501608181 | Tumor_G2 |
| 5754 | NDUFB7   | 8.655149123 | Tumor_G2 |
| 5755 | CYC1     | 7.281810376 | Tumor_G2 |
| 5756 | ETFB     | 5.269092828 | Tumor_G2 |
| 5757 | UQCR10   | 7.847363061 | Tumor_G2 |
| 5758 | UQCRQ    | 7.224973258 | Tumor_G2 |



|      |          |             |          |
|------|----------|-------------|----------|
| 5759 | UQCC3    | 4.468893026 | Tumor_G2 |
| 5760 | COX15    | 5.488319254 | Tumor_G2 |
| 5761 | COX5A    | 7.245654297 | Tumor_G2 |
| 5762 | COX6B1   | 8.490440405 | Tumor_G2 |
| 5763 | COX6C    | 6.413163185 | Tumor_G2 |
| 5764 | COX7A2   | 6.889062144 | Tumor_G2 |
| 5765 | COX7B    | 6.262570396 | Tumor_G2 |
| 5766 | COX8A    | 9.71470728  | Tumor_G2 |
| 5767 | SCO1     | 3.95323543  | Tumor_G2 |
| 5768 | SURF1    | 6.722018628 | Tumor_G2 |
| 5769 | ATP6V1E1 | 6.763599312 | Tumor_G2 |
| 5770 | DLAT     | 5.768285802 | Tumor_G2 |
| 5771 | PDC      | 0.065997244 | Tumor_G2 |
| 5772 | SUCLG2   | 6.718615045 | Tumor_G2 |
| 5773 | SLC25A5  | 8.79576     | Tumor_G2 |
| 5774 | UCP2     | 7.491900886 | Tumor_G2 |
| 5775 | SOD2     | 4.997605576 | Tumor_G2 |
| 5776 | NOX4     | 0.890149463 | Tumor_G2 |
| 5777 | DUOX1    | 7.646037415 | Tumor_G2 |
| 5778 | DUOXA1   | 6.683290366 | Tumor_G2 |
| 5779 | DUOX2    | 7.483484112 | Tumor_G2 |
| 5780 | DUOXA2   | 5.180490659 | Tumor_G2 |
| 5781 | NDUFA1   | 8.47310475  | Tumor_G2 |
| 5782 | NDUFA2   | 6.946968215 | Tumor_G2 |
| 5783 | NDUFA8   | 7.654805411 | Tumor_G2 |
| 5784 | NDUFB1   | 6.154993013 | Tumor_G2 |
| 5785 | NDUFB10  | 7.293299852 | Tumor_G2 |
| 5786 | NDUFB2   | 7.556202614 | Tumor_G2 |
| 5787 | NDUFB3   | 7.126433907 | Tumor_G2 |
| 5788 | NDUFB7   | 9.131522511 | Tumor_G2 |
| 5789 | CYC1     | 7.221046869 | Tumor_G2 |
| 5790 | ETFB     | 5.345314386 | Tumor_G2 |
| 5791 | UQCR10   | 8.322019965 | Tumor_G2 |
| 5792 | UQCRQ    | 7.527921727 | Tumor_G2 |
| 5793 | UQCC3    | 4.306263801 | Tumor_G2 |
| 5794 | COX15    | 5.628471462 | Tumor_G2 |
| 5795 | COX5A    | 7.211772355 | Tumor_G2 |
| 5796 | COX6B1   | 8.767542372 | Tumor_G2 |
| 5797 | COX6C    | 6.830346339 | Tumor_G2 |
| 5798 | COX7A2   | 7.017856557 | Tumor_G2 |

|      |          |             |          |
|------|----------|-------------|----------|
| 5799 | COX7B    | 6.68451212  | Tumor_G2 |
| 5800 | COX8A    | 9.99521251  | Tumor_G2 |
| 5801 | SCO1     | 4.460793267 | Tumor_G2 |
| 5802 | SURF1    | 6.823161491 | Tumor_G2 |
| 5803 | ATP6V1E1 | 6.996194378 | Tumor_G2 |
| 5804 | DLAT     | 5.382400346 | Tumor_G2 |
| 5805 | PDC      | 0.206739181 | Tumor_G2 |
| 5806 | SUCLG2   | 6.688951669 | Tumor_G2 |
| 5807 | SLC25A5  | 8.384420082 | Tumor_G2 |
| 5808 | UCP2     | 8.748682793 | Tumor_G2 |
| 5809 | SOD2     | 4.870563646 | Tumor_G2 |
| 5810 | NOX4     | 1.476337091 | Tumor_G2 |
| 5811 | DUOX1    | 7.463091211 | Tumor_G2 |
| 5812 | DUOXA1   | 6.466861527 | Tumor_G2 |
| 5813 | DUOX2    | 8.201223291 | Tumor_G2 |
| 5814 | DUOXA2   | 6.69134715  | Tumor_G2 |
| 5815 | NDUFA1   | 8.404610263 | Tumor_G2 |
| 5816 | NDUFA2   | 7.048148179 | Tumor_G2 |
| 5817 | NDUFA8   | 7.370252259 | Tumor_G2 |
| 5818 | NDUFB1   | 6.128919844 | Tumor_G2 |
| 5819 | NDUFB10  | 7.586684353 | Tumor_G2 |
| 5820 | NDUFB2   | 7.64564225  | Tumor_G2 |
| 5821 | NDUFB3   | 6.21775009  | Tumor_G2 |
| 5822 | NDUFB7   | 8.872541559 | Tumor_G2 |
| 5823 | CYC1     | 7.315041116 | Tumor_G2 |
| 5824 | ETFB     | 5.369895204 | Tumor_G2 |
| 5825 | UQCR10   | 7.950927409 | Tumor_G2 |
| 5826 | UQCRQ    | 8.094868926 | Tumor_G2 |
| 5827 | UQCC3    | 4.277387152 | Tumor_G2 |
| 5828 | COX15    | 4.619284469 | Tumor_G2 |
| 5829 | COX5A    | 7.532304884 | Tumor_G2 |
| 5830 | COX6B1   | 8.683771639 | Tumor_G2 |
| 5831 | COX6C    | 7.025737479 | Tumor_G2 |
| 5832 | COX7A2   | 7.426295835 | Tumor_G2 |
| 5833 | COX7B    | 6.416039838 | Tumor_G2 |
| 5834 | COX8A    | 10.09728584 | Tumor_G2 |
| 5835 | SCO1     | 3.135097623 | Tumor_G2 |
| 5836 | SURF1    | 6.808468334 | Tumor_G2 |
| 5837 | ATP6V1E1 | 6.873639206 | Tumor_G2 |
| 5838 | DLAT     | 4.505602989 | Tumor_G2 |

|      |          |             |          |
|------|----------|-------------|----------|
| 5839 | PDC      | 0           | Tumor_G2 |
| 5840 | SUCLG2   | 6.652415993 | Tumor_G2 |
| 5841 | SLC25A5  | 8.208682258 | Tumor_G2 |
| 5842 | UCP2     | 7.676924059 | Tumor_G2 |
| 5843 | SOD2     | 3.425386921 | Tumor_G2 |
| 5844 | NOX4     | 0.987964094 | Tumor_G2 |
| 5845 | DUOX1    | 6.766095045 | Tumor_G2 |
| 5846 | DUOXA1   | 5.81889249  | Tumor_G2 |
| 5847 | DUOX2    | 7.498979175 | Tumor_G2 |
| 5848 | DUOXA2   | 6.066273911 | Tumor_G2 |
| 5849 | NDUFA1   | 8.013425864 | Tumor_G2 |
| 5850 | NDUFA2   | 6.957288825 | Tumor_G2 |
| 5851 | NDUFA8   | 7.324516271 | Tumor_G2 |
| 5852 | NDUFB1   | 5.664945114 | Tumor_G2 |
| 5853 | NDUFB10  | 7.657378493 | Tumor_G2 |
| 5854 | NDUFB2   | 7.12564996  | Tumor_G2 |
| 5855 | NDUFB3   | 6.592276317 | Tumor_G2 |
| 5856 | NDUFB7   | 9.02269165  | Tumor_G2 |
| 5857 | CYC1     | 7.04830347  | Tumor_G2 |
| 5858 | ETFB     | 5.128653824 | Tumor_G2 |
| 5859 | UQCR10   | 8.06511644  | Tumor_G2 |
| 5860 | UQCRQ    | 7.300106848 | Tumor_G2 |
| 5861 | UQCC3    | 4.299214155 | Tumor_G2 |
| 5862 | COX15    | 5.16397924  | Tumor_G2 |
| 5863 | COX5A    | 7.132077893 | Tumor_G2 |
| 5864 | COX6B1   | 8.536096835 | Tumor_G2 |
| 5865 | COX6C    | 6.39707604  | Tumor_G2 |
| 5866 | COX7A2   | 6.612076206 | Tumor_G2 |
| 5867 | COX7B    | 6.087193441 | Tumor_G2 |
| 5868 | COX8A    | 9.870781845 | Tumor_G2 |
| 5869 | SCO1     | 4.276621223 | Tumor_G2 |
| 5870 | SURF1    | 6.916946854 | Tumor_G2 |
| 5871 | ATP6V1E1 | 6.655804557 | Tumor_G2 |
| 5872 | DLAT     | 5.187155448 | Tumor_G2 |
| 5873 | PDC      | 0.133943421 | Tumor_G2 |
| 5874 | SUCLG2   | 6.225343912 | Tumor_G2 |
| 5875 | SLC25A5  | 8.511649645 | Tumor_G2 |
| 5876 | UCP2     | 6.805967649 | Tumor_G2 |
| 5877 | SOD2     | 5.162548063 | Tumor_G2 |
| 5878 | NOX4     | 0.995442697 | Tumor_G2 |

|      |          |             |          |
|------|----------|-------------|----------|
| 5879 | DUOX1    | 8.142157143 | Tumor_G2 |
| 5880 | DUOXA1   | 6.998775882 | Tumor_G2 |
| 5881 | DUOX2    | 7.953433471 | Tumor_G2 |
| 5882 | DUOXA2   | 6.494397094 | Tumor_G2 |
| 5883 | NDUFA1   | 8.15016676  | Tumor_G2 |
| 5884 | NDUFA2   | 6.961543093 | Tumor_G2 |
| 5885 | NDUFA8   | 7.314117276 | Tumor_G2 |
| 5886 | NDUFB1   | 5.739256612 | Tumor_G2 |
| 5887 | NDUFB10  | 7.761277471 | Tumor_G2 |
| 5888 | NDUFB2   | 6.732774272 | Tumor_G2 |
| 5889 | NDUFB3   | 6.249770432 | Tumor_G2 |
| 5890 | NDUFB7   | 8.933372652 | Tumor_G2 |
| 5891 | CYC1     | 7.057129473 | Tumor_G2 |
| 5892 | ETFB     | 5.376414635 | Tumor_G2 |
| 5893 | UQCR10   | 7.80259569  | Tumor_G2 |
| 5894 | UQCRQ    | 7.251804432 | Tumor_G2 |
| 5895 | UQCC3    | 4.607433678 | Tumor_G2 |
| 5896 | COX15    | 5.102171266 | Tumor_G2 |
| 5897 | COX5A    | 7.040235741 | Tumor_G2 |
| 5898 | COX6B1   | 8.876025483 | Tumor_G2 |
| 5899 | COX6C    | 6.535611368 | Tumor_G2 |
| 5900 | COX7A2   | 6.841750957 | Tumor_G2 |
| 5901 | COX7B    | 6.08935425  | Tumor_G2 |
| 5902 | COX8A    | 9.776178431 | Tumor_G2 |
| 5903 | SCO1     | 3.377912573 | Tumor_G2 |
| 5904 | SURF1    | 7.00025906  | Tumor_G2 |
| 5905 | ATP6V1E1 | 6.88853097  | Tumor_G2 |
| 5906 | DLAT     | 4.80351728  | Tumor_G2 |
| 5907 | PDC      | 0.071244958 | Tumor_G2 |
| 5908 | SUCLG2   | 6.341851505 | Tumor_G2 |
| 5909 | SLC25A5  | 8.008653641 | Tumor_G2 |
| 5910 | UCP2     | 8.257176088 | Tumor_G2 |
| 5911 | SOD2     | 4.923902495 | Tumor_G2 |
| 5912 | NOX4     | 1.040083357 | Tumor_G2 |
| 5913 | DUOX1    | 6.906244272 | Tumor_G2 |
| 5914 | DUOXA1   | 6.900197049 | Tumor_G2 |
| 5915 | DUOX2    | 7.997902127 | Tumor_G2 |
| 5916 | DUOXA2   | 6.586774613 | Tumor_G2 |
| 5917 | NDUFA1   | 8.533411407 | Tumor_G2 |
| 5918 | NDUFA2   | 7.101303649 | Tumor_G2 |

|      |          |             |          |
|------|----------|-------------|----------|
| 5919 | NDUFA8   | 7.515512291 | Tumor_G2 |
| 5920 | NDUFB1   | 6.212524061 | Tumor_G2 |
| 5921 | NDUFB10  | 7.64216563  | Tumor_G2 |
| 5922 | NDUFB2   | 7.162881417 | Tumor_G2 |
| 5923 | NDUFB3   | 6.739402838 | Tumor_G2 |
| 5924 | NDUFB7   | 8.952897082 | Tumor_G2 |
| 5925 | CYC1     | 7.093328076 | Tumor_G2 |
| 5926 | ETFB     | 5.594770472 | Tumor_G2 |
| 5927 | UQCR10   | 7.489344217 | Tumor_G2 |
| 5928 | UQCRQ    | 7.692090565 | Tumor_G2 |
| 5929 | UQCC3    | 4.762859407 | Tumor_G2 |
| 5930 | COX15    | 5.064888462 | Tumor_G2 |
| 5931 | COX5A    | 7.270755924 | Tumor_G2 |
| 5932 | COX6B1   | 8.859948455 | Tumor_G2 |
| 5933 | COX6C    | 6.799786299 | Tumor_G2 |
| 5934 | COX7A2   | 7.125268151 | Tumor_G2 |
| 5935 | COX7B    | 6.419445539 | Tumor_G2 |
| 5936 | COX8A    | 10.06786482 | Tumor_G2 |
| 5937 | SCO1     | 3.755870777 | Tumor_G2 |
| 5938 | SURF1    | 6.8562483   | Tumor_G2 |
| 5939 | ATP6V1E1 | 6.193596675 | Tumor_G2 |
| 5940 | DLAT     | 5.114789398 | Tumor_G2 |
| 5941 | PDC      | 0.301890352 | Tumor_G2 |
| 5942 | SUCLG2   | 6.196097615 | Tumor_G2 |
| 5943 | SLC25A5  | 7.768191726 | Tumor_G2 |
| 5944 | UCP2     | 8.338245744 | Tumor_G2 |
| 5945 | SOD2     | 4.617508141 | Tumor_G2 |
| 5946 | NOX4     | 1.668103492 | Tumor_G2 |
| 5947 | DUOX1    | 8.343431595 | Tumor_G2 |
| 5948 | DUOXA1   | 7.797161212 | Tumor_G2 |
| 5949 | DUOX2    | 9.600139436 | Tumor_G2 |
| 5950 | DUOXA2   | 7.680060144 | Tumor_G2 |
| 5951 | NDUFA1   | 8.549269711 | Tumor_G2 |
| 5952 | NDUFA2   | 7.125378636 | Tumor_G2 |
| 5953 | NDUFA8   | 7.346401693 | Tumor_G2 |
| 5954 | NDUFB1   | 6.133577025 | Tumor_G2 |
| 5955 | NDUFB10  | 7.467593057 | Tumor_G2 |
| 5956 | NDUFB2   | 7.336123263 | Tumor_G2 |
| 5957 | NDUFB3   | 6.162059904 | Tumor_G2 |
| 5958 | NDUFB7   | 8.881845207 | Tumor_G2 |

|      |          |             |          |
|------|----------|-------------|----------|
| 5959 | CYC1     | 6.954316312 | Tumor_G2 |
| 5960 | ETFB     | 5.376665955 | Tumor_G2 |
| 5961 | UQCR10   | 7.068990836 | Tumor_G2 |
| 5962 | UQCRQ    | 7.650805085 | Tumor_G2 |
| 5963 | UQCC3    | 3.636062083 | Tumor_G2 |
| 5964 | COX15    | 4.837532129 | Tumor_G2 |
| 5965 | COX5A    | 7.313253959 | Tumor_G2 |
| 5966 | COX6B1   | 8.523552156 | Tumor_G2 |
| 5967 | COX6C    | 6.196906523 | Tumor_G2 |
| 5968 | COX7A2   | 6.802597363 | Tumor_G2 |
| 5969 | COX7B    | 6.456170079 | Tumor_G2 |
| 5970 | COX8A    | 9.384557086 | Tumor_G2 |
| 5971 | SCO1     | 4.00024529  | Tumor_G2 |
| 5972 | SURF1    | 6.887643905 | Tumor_G2 |
| 5973 | ATP6V1E1 | 6.338147301 | Tumor_G2 |
| 5974 | DLAT     | 5.024577041 | Tumor_G2 |
| 5975 | PDC      | 0.043299934 | Tumor_G2 |
| 5976 | SUCLG2   | 5.762178302 | Tumor_G2 |
| 5977 | SLC25A5  | 8.986123031 | Tumor_G2 |
| 5978 | UCP2     | 5.310780758 | Tumor_G2 |
| 5979 | SOD2     | 4.680768023 | Tumor_G2 |
| 5980 | NOX4     | 0.686171876 | Tumor_G2 |
| 5981 | DUOX1    | 6.361781781 | Tumor_G2 |
| 5982 | DUOXA1   | 5.940176642 | Tumor_G2 |
| 5983 | DUOX2    | 6.566986084 | Tumor_G2 |
| 5984 | DUOXA2   | 7.294907992 | Tumor_G2 |
| 5985 | NDUFA1   | 8.067614109 | Tumor_G2 |
| 5986 | NDUFA2   | 6.874426932 | Tumor_G2 |
| 5987 | NDUFA8   | 7.156155661 | Tumor_G2 |
| 5988 | NDUFB1   | 5.570508816 | Tumor_G2 |
| 5989 | NDUFB10  | 7.640763887 | Tumor_G2 |
| 5990 | NDUFB2   | 6.466324134 | Tumor_G2 |
| 5991 | NDUFB3   | 6.189256253 | Tumor_G2 |
| 5992 | NDUFB7   | 8.753538552 | Tumor_G2 |
| 5993 | CYC1     | 6.965739701 | Tumor_G2 |
| 5994 | ETFB     | 4.496172354 | Tumor_G2 |
| 5995 | UQCR10   | 7.380913413 | Tumor_G2 |
| 5996 | UQCRQ    | 7.037975945 | Tumor_G2 |
| 5997 | UQCC3    | 4.67216855  | Tumor_G2 |
| 5998 | COX15    | 5.275061635 | Tumor_G2 |

|      |          |             |          |
|------|----------|-------------|----------|
| 5999 | COX5A    | 6.757457524 | Tumor_G2 |
| 6000 | COX6B1   | 8.760559492 | Tumor_G2 |
| 6001 | COX6C    | 6.215783799 | Tumor_G2 |
| 6002 | COX7A2   | 6.789526825 | Tumor_G2 |
| 6003 | COX7B    | 5.836998403 | Tumor_G2 |
| 6004 | COX8A    | 9.47820377  | Tumor_G2 |
| 6005 | SCO1     | 3.686968025 | Tumor_G2 |
| 6006 | SURF1    | 6.973640844 | Tumor_G2 |
| 6007 | ATP6V1E1 | 6.773773997 | Tumor_G2 |
| 6008 | DLAT     | 5.478467929 | Tumor_G2 |
| 6009 | PDC      | 0.07448003  | Tumor_G2 |
| 6010 | SUCLG2   | 5.997375753 | Tumor_G2 |
| 6011 | SLC25A5  | 7.814614267 | Tumor_G2 |
| 6012 | UCP2     | 8.297157279 | Tumor_G2 |
| 6013 | SOD2     | 4.979472933 | Tumor_G2 |
| 6014 | NOX4     | 2.762101092 | Tumor_G2 |
| 6015 | DUOX1    | 5.750259232 | Tumor_G2 |
| 6016 | DUOXA1   | 6.555770797 | Tumor_G2 |
| 6017 | DUOX2    | 6.984900754 | Tumor_G2 |
| 6018 | DUOXA2   | 7.003081564 | Tumor_G2 |
| 6019 | NDUFA1   | 8.244612851 | Tumor_G2 |
| 6020 | NDUFA2   | 7.0376258   | Tumor_G2 |
| 6021 | NDUFA8   | 7.377292262 | Tumor_G2 |
| 6022 | NDUFB1   | 6.039744205 | Tumor_G2 |
| 6023 | NDUFB10  | 7.951042836 | Tumor_G2 |
| 6024 | NDUFB2   | 6.618423923 | Tumor_G2 |
| 6025 | NDUFB3   | 6.194752869 | Tumor_G2 |
| 6026 | NDUFB7   | 8.535402125 | Tumor_G2 |
| 6027 | CYC1     | 7.124579953 | Tumor_G2 |
| 6028 | ETFB     | 5.47962914  | Tumor_G2 |
| 6029 | UQCR10   | 7.954955799 | Tumor_G2 |
| 6030 | UQCRQ    | 7.278455822 | Tumor_G2 |
| 6031 | UQCC3    | 5.073336243 | Tumor_G2 |
| 6032 | COX15    | 5.223388814 | Tumor_G2 |
| 6033 | COX5A    | 7.115930299 | Tumor_G2 |
| 6034 | COX6B1   | 8.914065182 | Tumor_G2 |
| 6035 | COX6C    | 6.554107186 | Tumor_G2 |
| 6036 | COX7A2   | 6.797048842 | Tumor_G2 |
| 6037 | COX7B    | 6.174132254 | Tumor_G2 |
| 6038 | COX8A    | 9.955625274 | Tumor_G2 |

|      |          |             |          |
|------|----------|-------------|----------|
| 6039 | SCO1     | 3.272574869 | Tumor_G2 |
| 6040 | SURF1    | 6.962698053 | Tumor_G2 |
| 6041 | ATP6V1E1 | 6.578769807 | Tumor_G2 |
| 6042 | DLAT     | 4.879525543 | Tumor_G2 |
| 6043 | PDC      | 0           | Tumor_G2 |
| 6044 | SUCLG2   | 5.959545507 | Tumor_G2 |
| 6045 | SLC25A5  | 8.035801335 | Tumor_G2 |
| 6046 | UCP2     | 7.378063801 | Tumor_G2 |
| 6047 | SOD2     | 4.387072063 | Tumor_G2 |
| 6048 | NOX4     | 1.553076875 | Tumor_G2 |
| 6049 | DUOX1    | 7.618480953 | Tumor_G2 |
| 6050 | DUOXA1   | 7.527834544 | Tumor_G2 |
| 6051 | DUOX2    | 8.558507496 | Tumor_G2 |
| 6052 | DUOXA2   | 6.912740391 | Tumor_G2 |
| 6053 | NDUFA1   | 8.043684046 | Tumor_G2 |
| 6054 | NDUFA2   | 6.616221265 | Tumor_G2 |
| 6055 | NDUFA8   | 7.26198181  | Tumor_G2 |
| 6056 | NDUFB1   | 5.924976398 | Tumor_G2 |
| 6057 | NDUFB10  | 7.925459161 | Tumor_G2 |
| 6058 | NDUFB2   | 6.569691477 | Tumor_G2 |
| 6059 | NDUFB3   | 6.649080029 | Tumor_G2 |
| 6060 | NDUFB7   | 8.826230526 | Tumor_G2 |
| 6061 | CYC1     | 7.06389526  | Tumor_G2 |
| 6062 | ETFB     | 4.747745389 | Tumor_G2 |
| 6063 | UQCR10   | 7.764657671 | Tumor_G2 |
| 6064 | UQCRQ    | 7.402386134 | Tumor_G2 |
| 6065 | UQCC3    | 4.89605651  | Tumor_G2 |
| 6066 | COX15    | 4.511273101 | Tumor_G2 |
| 6067 | COX5A    | 7.287329781 | Tumor_G2 |
| 6068 | COX6B1   | 8.924110958 | Tumor_G2 |
| 6069 | COX6C    | 6.602521341 | Tumor_G2 |
| 6070 | COX7A2   | 6.968229486 | Tumor_G2 |
| 6071 | COX7B    | 6.115685178 | Tumor_G2 |
| 6072 | COX8A    | 9.536521713 | Tumor_G2 |
| 6073 | SCO1     | 3.187828998 | Tumor_G2 |
| 6074 | SURF1    | 6.845283326 | Tumor_G2 |
| 6075 | ATP6V1E1 | 6.925276899 | Tumor_G2 |
| 6076 | DLAT     | 4.678797558 | Tumor_G2 |
| 6077 | PDC      | 0.196072866 | Tumor_G2 |
| 6078 | SUCLG2   | 5.883527988 | Tumor_G2 |



|      |          |             |          |
|------|----------|-------------|----------|
| 6079 | SLC25A5  | 7.687162707 | Tumor_G2 |
| 6080 | UCP2     | 9.347167531 | Tumor_G2 |
| 6081 | SOD2     | 3.942449938 | Tumor_G2 |
| 6082 | NOX4     | 2.552955415 | Tumor_G2 |
| 6083 | DUOX1    | 6.443333081 | Tumor_G2 |
| 6084 | DUOXA1   | 6.702837219 | Tumor_G2 |
| 6085 | DUOX2    | 7.100182409 | Tumor_G2 |
| 6086 | DUOXA2   | 4.644041619 | Tumor_G2 |
| 6087 | NDUFA1   | 8.385254209 | Tumor_G2 |
| 6088 | NDUFA2   | 7.041763964 | Tumor_G2 |
| 6089 | NDUFA8   | 7.446527893 | Tumor_G2 |
| 6090 | NDUFB1   | 6.139296889 | Tumor_G2 |
| 6091 | NDUFB10  | 7.704786734 | Tumor_G2 |
| 6092 | NDUFB2   | 6.993811435 | Tumor_G2 |
| 6093 | NDUFB3   | 6.46209847  | Tumor_G2 |
| 6094 | NDUFB7   | 9.140016426 | Tumor_G2 |
| 6095 | CYC1     | 7.234739654 | Tumor_G2 |
| 6096 | ETFB     | 5.421753367 | Tumor_G2 |
| 6097 | UQCR10   | 7.982551905 | Tumor_G2 |
| 6098 | UQCRQ    | 7.453964865 | Tumor_G2 |
| 6099 | UQCC3    | 4.619090094 | Tumor_G2 |
| 6100 | COX15    | 5.076138059 | Tumor_G2 |
| 6101 | COX5A    | 7.404045606 | Tumor_G2 |
| 6102 | COX6B1   | 9.079464826 | Tumor_G2 |
| 6103 | COX6C    | 6.987639112 | Tumor_G2 |
| 6104 | COX7A2   | 7.225951981 | Tumor_G2 |
| 6105 | COX7B    | 6.526706523 | Tumor_G2 |
| 6106 | COX8A    | 9.767609945 | Tumor_G2 |
| 6107 | SCO1     | 3.387064506 | Tumor_G2 |
| 6108 | SURF1    | 7.126094416 | Tumor_G2 |
| 6109 | ATP6V1E1 | 6.998202613 | Tumor_G2 |
| 6110 | DLAT     | 5.008830984 | Tumor_G2 |
| 6111 | PDC      | 0.085498992 | Tumor_G2 |
| 6112 | SUCLG2   | 6.627188061 | Tumor_G2 |
| 6113 | SLC25A5  | 8.698837197 | Tumor_G2 |
| 6114 | UCP2     | 7.229985575 | Tumor_G2 |
| 6115 | SOD2     | 4.658830301 | Tumor_G2 |
| 6116 | NOX4     | 1.683822681 | Tumor_G2 |
| 6117 | DUOX1    | 7.373971619 | Tumor_G2 |
| 6118 | DUOXA1   | 6.803321875 | Tumor_G2 |

|      |          |             |          |
|------|----------|-------------|----------|
| 6119 | DUOX2    | 7.847887422 | Tumor_G2 |
| 6120 | DUOXA2   | 5.257728417 | Tumor_G2 |
| 6121 | NDUFA1   | 8.479349289 | Tumor_G2 |
| 6122 | NDUFA2   | 7.242084364 | Tumor_G2 |
| 6123 | NDUFA8   | 7.457141811 | Tumor_G2 |
| 6124 | NDUFB1   | 6.130352872 | Tumor_G2 |
| 6125 | NDUFB10  | 7.934387183 | Tumor_G2 |
| 6126 | NDUFB2   | 6.629726579 | Tumor_G2 |
| 6127 | NDUFB3   | 6.260780674 | Tumor_G2 |
| 6128 | NDUFB7   | 9.279951511 | Tumor_G2 |
| 6129 | CYC1     | 7.159660298 | Tumor_G2 |
| 6130 | ETFB     | 5.738181388 | Tumor_G2 |
| 6131 | UQCR10   | 8.033982744 | Tumor_G2 |
| 6132 | UQCRQ    | 7.297679147 | Tumor_G2 |
| 6133 | UQCC3    | 5.450437112 | Tumor_G2 |
| 6134 | COX15    | 5.463168177 | Tumor_G2 |
| 6135 | COX5A    | 6.845482363 | Tumor_G2 |
| 6136 | COX6B1   | 8.780029189 | Tumor_G2 |
| 6137 | COX6C    | 6.553884411 | Tumor_G2 |
| 6138 | COX7A2   | 6.752818088 | Tumor_G2 |
| 6139 | COX7B    | 6.004752542 | Tumor_G2 |
| 6140 | COX8A    | 10.01436714 | Tumor_G2 |
| 6141 | SCO1     | 3.528289531 | Tumor_G2 |
| 6142 | SURF1    | 7.203073617 | Tumor_G2 |
| 6143 | ATP6V1E1 | 6.441789901 | Tumor_G2 |
| 6144 | DLAT     | 5.020654796 | Tumor_G2 |
| 6145 | PDC      | 0.129464626 | Tumor_G2 |
| 6146 | SUCLG2   | 6.022300792 | Tumor_G2 |
| 6147 | SLC25A5  | 7.666704205 | Tumor_G2 |
| 6148 | UCP2     | 6.349235753 | Tumor_G2 |
| 6149 | SOD2     | 4.764268165 | Tumor_G2 |
| 6150 | NOX4     | 0.947119153 | Tumor_G2 |
| 6151 | DUOX1    | 7.211658482 | Tumor_G2 |
| 6152 | DUOXA1   | 6.752834901 | Tumor_G2 |
| 6153 | DUOX2    | 7.647851895 | Tumor_G2 |
| 6154 | DUOXA2   | 5.70098537  | Tumor_G2 |
| 6155 | NDUFA1   | 8.004971408 | Tumor_G2 |
| 6156 | NDUFA2   | 6.58672736  | Tumor_G2 |
| 6157 | NDUFA8   | 6.850291434 | Tumor_G2 |
| 6158 | NDUFB1   | 5.686238187 | Tumor_G2 |

|      |          |             |          |
|------|----------|-------------|----------|
| 6159 | NDUFB10  | 6.847570812 | Tumor_G2 |
| 6160 | NDUFB2   | 6.50899193  | Tumor_G2 |
| 6161 | NDUFB3   | 5.979531788 | Tumor_G2 |
| 6162 | NDUFB7   | 8.241196711 | Tumor_G2 |
| 6163 | CYC1     | 6.801639686 | Tumor_G2 |
| 6164 | ETFB     | 4.853185449 | Tumor_G2 |
| 6165 | UQCR10   | 7.288343034 | Tumor_G2 |
| 6166 | UQCRQ    | 7.202047812 | Tumor_G2 |
| 6167 | UQCC3    | 4.073810259 | Tumor_G2 |
| 6168 | COX15    | 4.408350641 | Tumor_G2 |
| 6169 | COX5A    | 6.76321464  | Tumor_G2 |
| 6170 | COX6B1   | 8.289516876 | Tumor_G2 |
| 6171 | COX6C    | 6.315465747 | Tumor_G2 |
| 6172 | COX7A2   | 6.618097892 | Tumor_G2 |
| 6173 | COX7B    | 5.918978772 | Tumor_G2 |
| 6174 | COX8A    | 9.318708055 | Tumor_G2 |
| 6175 | SCO1     | 2.68907642  | Tumor_G2 |
| 6176 | SURF1    | 6.040892713 | Tumor_G2 |
| 6177 | ATP6V1E1 | 6.648620766 | Tumor_G2 |
| 6178 | DLAT     | 4.274160103 | Tumor_G2 |
| 6179 | PDC      | 0           | Tumor_G2 |
| 6180 | SUCLG2   | 6.171676365 | Tumor_G2 |
| 6181 | SLC25A5  | 7.732145044 | Tumor_G2 |
| 6182 | UCP2     | 7.153756306 | Tumor_G2 |
| 6183 | SOD2     | 3.493574169 | Tumor_G2 |
| 6184 | NOX4     | 1.367294193 | Tumor_G2 |
| 6185 | DUOX1    | 6.798802886 | Tumor_G2 |
| 6186 | DUOXA1   | 6.113673812 | Tumor_G2 |
| 6187 | DUOX2    | 8.543398587 | Tumor_G2 |
| 6188 | DUOXA2   | 7.331513142 | Tumor_G2 |
| 6189 | NDUFA1   | 8.383368944 | Tumor_G2 |
| 6190 | NDUFA2   | 7.123141829 | Tumor_G2 |
| 6191 | NDUFA8   | 7.311097791 | Tumor_G2 |
| 6192 | NDUFB1   | 6.237172281 | Tumor_G2 |
| 6193 | NDUFB10  | 7.827132063 | Tumor_G2 |
| 6194 | NDUFB2   | 7.280072586 | Tumor_G2 |
| 6195 | NDUFB3   | 6.742157117 | Tumor_G2 |
| 6196 | NDUFB7   | 9.032639407 | Tumor_G2 |
| 6197 | CYC1     | 7.13571579  | Tumor_G2 |
| 6198 | ETFB     | 5.295515618 | Tumor_G2 |

|      |          |             |          |
|------|----------|-------------|----------|
| 6199 | UQCR10   | 8.072939482 | Tumor_G2 |
| 6200 | UQCRQ    | 7.659152652 | Tumor_G2 |
| 6201 | UQCC3    | 4.738705664 | Tumor_G2 |
| 6202 | COX15    | 4.971300028 | Tumor_G2 |
| 6203 | COX5A    | 7.240813253 | Tumor_G2 |
| 6204 | COX6B1   | 8.795656569 | Tumor_G2 |
| 6205 | COX6C    | 6.956702291 | Tumor_G2 |
| 6206 | COX7A2   | 7.186265461 | Tumor_G2 |
| 6207 | COX7B    | 6.458296463 | Tumor_G2 |
| 6208 | COX8A    | 10.04891436 | Tumor_G2 |
| 6209 | SCO1     | 3.529661621 | Tumor_G2 |
| 6210 | SURF1    | 6.729394813 | Tumor_G2 |
| 6211 | ATP6V1E1 | 7.007971962 | Tumor_G2 |
| 6212 | DLAT     | 5.124537685 | Tumor_G2 |
| 6213 | PDC      | 0.450892666 | Tumor_G2 |
| 6214 | SUCLG2   | 6.434888954 | Tumor_G2 |
| 6215 | SLC25A5  | 8.26772899  | Tumor_G2 |
| 6216 | UCP2     | 7.796728859 | Tumor_G2 |
| 6217 | SOD2     | 4.479093348 | Tumor_G2 |
| 6218 | NOX4     | 1.287836792 | Tumor_G2 |
| 6219 | DUOX1    | 7.615607562 | Tumor_G2 |
| 6220 | DUOXA1   | 7.35630683  | Tumor_G2 |
| 6221 | DUOX2    | 8.564977399 | Tumor_G2 |
| 6222 | DUOXA2   | 6.420466384 | Tumor_G2 |
| 6223 | NDUFA1   | 8.401057897 | Tumor_G2 |
| 6224 | NDUFA2   | 6.873415992 | Tumor_G2 |
| 6225 | NDUFA8   | 7.163150505 | Tumor_G2 |
| 6226 | NDUFB1   | 6.167740507 | Tumor_G2 |
| 6227 | NDUFB10  | 7.920955192 | Tumor_G2 |
| 6228 | NDUFB2   | 7.051037225 | Tumor_G2 |
| 6229 | NDUFB3   | 6.761218574 | Tumor_G2 |
| 6230 | NDUFB7   | 9.016045563 | Tumor_G2 |
| 6231 | CYC1     | 6.998966419 | Tumor_G2 |
| 6232 | ETFB     | 5.430696492 | Tumor_G2 |
| 6233 | UQCR10   | 7.952447889 | Tumor_G2 |
| 6234 | UQCRQ    | 7.668037779 | Tumor_G2 |
| 6235 | UQCC3    | 4.4785316   | Tumor_G2 |
| 6236 | COX15    | 4.684045787 | Tumor_G2 |
| 6237 | COX5A    | 7.385868766 | Tumor_G2 |
| 6238 | COX6B1   | 8.940633757 | Tumor_G2 |

|      |          |             |          |
|------|----------|-------------|----------|
| 6239 | COX6C    | 7.000375684 | Tumor_G2 |
| 6240 | COX7A2   | 7.266968082 | Tumor_G2 |
| 6241 | COX7B    | 6.459229112 | Tumor_G2 |
| 6242 | COX8A    | 9.875995551 | Tumor_G2 |
| 6243 | SCO1     | 3.366901527 | Tumor_G2 |
| 6244 | SURF1    | 6.877157233 | Tumor_G2 |
| 6245 | ATP6V1E1 | 6.972530092 | Tumor_G2 |
| 6246 | DLAT     | 4.938975629 | Tumor_G2 |
| 6247 | PDC      | 0.280047103 | Tumor_G2 |
| 6248 | SUCLG2   | 6.113886026 | Tumor_G2 |
| 6249 | SLC25A5  | 8.004408853 | Tumor_G2 |
| 6250 | UCP2     | 9.008526944 | Tumor_G2 |
| 6251 | SOD2     | 5.155701851 | Tumor_G2 |
| 6252 | NOX4     | 2.280564873 | Tumor_G2 |
| 6253 | DUOX1    | 7.149136503 | Tumor_G2 |
| 6254 | DUOXA1   | 7.415149412 | Tumor_G2 |
| 6255 | DUOX2    | 7.916583687 | Tumor_G2 |
| 6256 | DUOXA2   | 5.826237806 | Tumor_G2 |
| 6257 | NDUFA1   | 8.299299024 | Tumor_G2 |
| 6258 | NDUFA2   | 7.056280854 | Tumor_G2 |
| 6259 | NDUFA8   | 7.360247526 | Tumor_G2 |
| 6260 | NDUFB1   | 5.956001249 | Tumor_G2 |
| 6261 | NDUFB10  | 7.833075372 | Tumor_G2 |
| 6262 | NDUFB2   | 6.671437935 | Tumor_G2 |
| 6263 | NDUFB3   | 6.523684747 | Tumor_G2 |
| 6264 | NDUFB7   | 9.015204297 | Tumor_G2 |
| 6265 | CYC1     | 6.936112746 | Tumor_G2 |
| 6266 | ETFB     | 5.006549444 | Tumor_G2 |
| 6267 | UQCR10   | 7.795684406 | Tumor_G2 |
| 6268 | UQCRQ    | 7.634958131 | Tumor_G2 |
| 6269 | UQCC3    | 4.625235652 | Tumor_G2 |
| 6270 | COX15    | 4.308867338 | Tumor_G2 |
| 6271 | COX5A    | 7.352143905 | Tumor_G2 |
| 6272 | COX6B1   | 9.084250848 | Tumor_G2 |
| 6273 | COX6C    | 6.643301968 | Tumor_G2 |
| 6274 | COX7A2   | 7.349884393 | Tumor_G2 |
| 6275 | COX7B    | 6.319501799 | Tumor_G2 |
| 6276 | COX8A    | 9.800130165 | Tumor_G2 |
| 6277 | SCO1     | 3.221674755 | Tumor_G2 |
| 6278 | SURF1    | 6.54670491  | Tumor_G2 |

|      |          |             |          |
|------|----------|-------------|----------|
| 6279 | ATP6V1E1 | 7.260639198 | Tumor_G2 |
| 6280 | DLAT     | 4.690144146 | Tumor_G2 |
| 6281 | PDC      | 0.11469446  | Tumor_G2 |
| 6282 | SUCLG2   | 5.690119343 | Tumor_G2 |
| 6283 | SLC25A5  | 7.95700026  | Tumor_G2 |
| 6284 | UCP2     | 9.760781249 | Tumor_G2 |
| 6285 | SOD2     | 4.546548659 | Tumor_G2 |
| 6286 | NOX4     | 3.771788702 | Tumor_G2 |
| 6287 | DUOX1    | 6.385307539 | Tumor_G2 |
| 6288 | DUOXA1   | 6.877596314 | Tumor_G2 |
| 6289 | DUOX2    | 6.709242867 | Tumor_G2 |
| 6290 | DUOXA2   | 4.635746211 | Tumor_G2 |
| 6291 | NDUFA1   | 8.092506357 | Tumor_G2 |
| 6292 | NDUFA2   | 6.621354875 | Tumor_G2 |
| 6293 | NDUFA8   | 7.168367015 | Tumor_G2 |
| 6294 | NDUFB1   | 5.780152021 | Tumor_G2 |
| 6295 | NDUFB10  | 7.820676748 | Tumor_G2 |
| 6296 | NDUFB2   | 7.008843593 | Tumor_G2 |
| 6297 | NDUFB3   | 6.282007576 | Tumor_G2 |
| 6298 | NDUFB7   | 8.779228071 | Tumor_G2 |
| 6299 | CYC1     | 7.410219524 | Tumor_G2 |
| 6300 | ETFB     | 5.282962503 | Tumor_G2 |
| 6301 | UQCR10   | 7.714087627 | Tumor_G2 |
| 6302 | UQCRQ    | 7.32259548  | Tumor_G2 |
| 6303 | UQCC3    | 4.788688023 | Tumor_G2 |
| 6304 | COX15    | 5.188838559 | Tumor_G2 |
| 6305 | COX5A    | 7.377681641 | Tumor_G2 |
| 6306 | COX6B1   | 8.712301238 | Tumor_G2 |
| 6307 | COX6C    | 6.443315618 | Tumor_G2 |
| 6308 | COX7A2   | 6.825382975 | Tumor_G2 |
| 6309 | COX7B    | 6.085044501 | Tumor_G2 |
| 6310 | COX8A    | 9.943767273 | Tumor_G2 |
| 6311 | SCO1     | 3.720215625 | Tumor_G2 |
| 6312 | SURF1    | 6.910857639 | Tumor_G2 |
| 6313 | ATP6V1E1 | 7.219019757 | Tumor_G2 |
| 6314 | DLAT     | 4.944283092 | Tumor_G2 |
| 6315 | PDC      | 0           | Tumor_G2 |
| 6316 | SUCLG2   | 6.495950178 | Tumor_G2 |
| 6317 | SLC25A5  | 8.48513515  | Tumor_G2 |
| 6318 | UCP2     | 8.50529878  | Tumor_G2 |

|      |          |             |          |
|------|----------|-------------|----------|
| 6319 | SOD2     | 4.272573974 | Tumor_G2 |
| 6320 | NOX4     | 1.924917282 | Tumor_G2 |
| 6321 | DUOX1    | 6.691814828 | Tumor_G2 |
| 6322 | DUOXA1   | 6.831422032 | Tumor_G2 |
| 6323 | DUOX2    | 7.391218569 | Tumor_G2 |
| 6324 | DUOXA2   | 5.838747656 | Tumor_G2 |
| 6325 | NDUFA1   | 7.969278743 | Tumor_G2 |
| 6326 | NDUFA2   | 6.731320072 | Tumor_G2 |
| 6327 | NDUFA8   | 7.272133968 | Tumor_G2 |
| 6328 | NDUFB1   | 6.082618703 | Tumor_G2 |
| 6329 | NDUFB10  | 7.751314952 | Tumor_G2 |
| 6330 | NDUFB2   | 6.65265418  | Tumor_G2 |
| 6331 | NDUFB3   | 6.367859628 | Tumor_G2 |
| 6332 | NDUFB7   | 8.928273221 | Tumor_G2 |
| 6333 | CYC1     | 6.844829081 | Tumor_G2 |
| 6334 | ETFB     | 5.289350717 | Tumor_G2 |
| 6335 | UQCR10   | 7.691702424 | Tumor_G2 |
| 6336 | UQCRQ    | 7.335422689 | Tumor_G2 |
| 6337 | UQCC3    | 4.570990896 | Tumor_G2 |
| 6338 | COX15    | 4.723522299 | Tumor_G2 |
| 6339 | COX5A    | 6.832798024 | Tumor_G2 |
| 6340 | COX6B1   | 8.646961409 | Tumor_G2 |
| 6341 | COX6C    | 6.528198242 | Tumor_G2 |
| 6342 | COX7A2   | 6.678573564 | Tumor_G2 |
| 6343 | COX7B    | 6.178353007 | Tumor_G2 |
| 6344 | COX8A    | 9.714261924 | Tumor_G2 |
| 6345 | SCO1     | 3.364896594 | Tumor_G2 |
| 6346 | SURF1    | 6.467973688 | Tumor_G2 |
| 6347 | ATP6V1E1 | 6.799018051 | Tumor_G2 |
| 6348 | DLAT     | 4.912818236 | Tumor_G2 |
| 6349 | PDC      | 0.137910648 | Tumor_G2 |
| 6350 | SUCLG2   | 5.9863682   | Tumor_G2 |
| 6351 | SLC25A5  | 7.556056303 | Tumor_G2 |
| 6352 | UCP2     | 7.634882601 | Tumor_G2 |
| 6353 | SOD2     | 4.645159558 | Tumor_G2 |
| 6354 | NOX4     | 2.593266671 | Tumor_G2 |
| 6355 | DUOX1    | 8.109962939 | Tumor_G2 |
| 6356 | DUOXA1   | 7.877493316 | Tumor_G2 |
| 6357 | DUOX2    | 9.368483473 | Tumor_G2 |
| 6358 | DUOXA2   | 6.887621713 | Tumor_G2 |

|      |          |             |          |
|------|----------|-------------|----------|
| 6359 | NDUFA1   | 8.444199544 | Tumor_G2 |
| 6360 | NDUFA2   | 6.779725124 | Tumor_G2 |
| 6361 | NDUFA8   | 7.449950097 | Tumor_G2 |
| 6362 | NDUFB1   | 6.088675658 | Tumor_G2 |
| 6363 | NDUFB10  | 7.731508589 | Tumor_G2 |
| 6364 | NDUFB2   | 6.32636914  | Tumor_G2 |
| 6365 | NDUFB3   | 6.624015357 | Tumor_G2 |
| 6366 | NDUFB7   | 8.951215943 | Tumor_G2 |
| 6367 | CYC1     | 6.78807081  | Tumor_G2 |
| 6368 | ETFB     | 5.059442267 | Tumor_G2 |
| 6369 | UQCR10   | 7.788662059 | Tumor_G2 |
| 6370 | UQCRQ    | 7.458803997 | Tumor_G2 |
| 6371 | UQCC3    | 4.336485986 | Tumor_G2 |
| 6372 | COX15    | 4.928284137 | Tumor_G2 |
| 6373 | COX5A    | 7.226533175 | Tumor_G2 |
| 6374 | COX6B1   | 9.152950901 | Tumor_G2 |
| 6375 | COX6C    | 6.628351097 | Tumor_G2 |
| 6376 | COX7A2   | 6.914873962 | Tumor_G2 |
| 6377 | COX7B    | 6.621589986 | Tumor_G2 |
| 6378 | COX8A    | 9.619304455 | Tumor_G2 |
| 6379 | SCO1     | 3.128905327 | Tumor_G2 |
| 6380 | SURF1    | 6.708268904 | Tumor_G2 |
| 6381 | ATP6V1E1 | 6.574645009 | Tumor_G2 |
| 6382 | DLAT     | 4.775742496 | Tumor_G2 |
| 6383 | PDC      | 0.073280446 | Tumor_G2 |
| 6384 | SUCLG2   | 5.945194858 | Tumor_G2 |
| 6385 | SLC25A5  | 8.302990171 | Tumor_G2 |
| 6386 | UCP2     | 7.610015083 | Tumor_G2 |
| 6387 | SOD2     | 5.447196543 | Tumor_G2 |
| 6388 | NOX4     | 1.959743545 | Tumor_G2 |
| 6389 | DUOX1    | 7.01641008  | Tumor_G2 |
| 6390 | DUOXA1   | 6.725398157 | Tumor_G2 |
| 6391 | DUOX2    | 7.71669628  | Tumor_G2 |
| 6392 | DUOXA2   | 5.65078726  | Tumor_G2 |
| 6393 | NDUFA1   | 8.002999899 | Tumor_G2 |
| 6394 | NDUFA2   | 6.698082926 | Tumor_G2 |
| 6395 | NDUFA8   | 7.229630571 | Tumor_G2 |
| 6396 | NDUFB1   | 5.690675161 | Tumor_G2 |
| 6397 | NDUFB10  | 7.778235255 | Tumor_G2 |
| 6398 | NDUFB2   | 6.933922821 | Tumor_G2 |



|      |          |             |          |
|------|----------|-------------|----------|
| 6399 | NDUFB3   | 6.323763302 | Tumor_G2 |
| 6400 | NDUFB7   | 8.728990206 | Tumor_G2 |
| 6401 | CYC1     | 7.182772901 | Tumor_G2 |
| 6402 | ETFB     | 4.898522264 | Tumor_G2 |
| 6403 | UQCR10   | 7.675872836 | Tumor_G2 |
| 6404 | UQCRQ    | 7.240121365 | Tumor_G2 |
| 6405 | UQCC3    | 4.414303026 | Tumor_G2 |
| 6406 | COX15    | 5.138137015 | Tumor_G2 |
| 6407 | COX5A    | 7.540694416 | Tumor_G2 |
| 6408 | COX6B1   | 8.721402475 | Tumor_G2 |
| 6409 | COX6C    | 6.473058599 | Tumor_G2 |
| 6410 | COX7A2   | 6.920539492 | Tumor_G2 |
| 6411 | COX7B    | 6.198653571 | Tumor_G2 |
| 6412 | COX8A    | 9.571618305 | Tumor_G2 |
| 6413 | SCO1     | 3.638352048 | Tumor_G2 |
| 6414 | SURF1    | 6.56116318  | Tumor_G2 |
| 6415 | ATP6V1E1 | 7.340668989 | Tumor_G2 |
| 6416 | DLAT     | 5.397295999 | Tumor_G2 |
| 6417 | PDC      | 0           | Tumor_G2 |
| 6418 | SUCLG2   | 6.425065039 | Tumor_G2 |
| 6419 | SLC25A5  | 8.463400013 | Tumor_G2 |
| 6420 | UCP2     | 7.397912163 | Tumor_G2 |
| 6421 | SOD2     | 5.341203114 | Tumor_G2 |
| 6422 | NOX4     | 1.30620555  | Tumor_G2 |
| 6423 | DUOX1    | 5.911733684 | Tumor_G2 |
| 6424 | DUOXA1   | 6.167437635 | Tumor_G2 |
| 6425 | DUOX2    | 6.114422172 | Tumor_G2 |
| 6426 | DUOXA2   | 4.509215047 | Tumor_G2 |
| 6427 | NDUFA1   | 8.107075907 | Tumor_G2 |
| 6428 | NDUFA2   | 6.838634379 | Tumor_G2 |
| 6429 | NDUFA8   | 7.12210327  | Tumor_G2 |
| 6430 | NDUFB1   | 6.030190133 | Tumor_G2 |
| 6431 | NDUFB10  | 7.458563823 | Tumor_G2 |
| 6432 | NDUFB2   | 6.607802708 | Tumor_G2 |
| 6433 | NDUFB3   | 6.55663804  | Tumor_G2 |
| 6434 | NDUFB7   | 8.849996961 | Tumor_G2 |
| 6435 | CYC1     | 7.042817679 | Tumor_G2 |
| 6436 | ETFB     | 4.995418801 | Tumor_G2 |
| 6437 | UQCR10   | 7.633468121 | Tumor_G2 |
| 6438 | UQCRQ    | 7.320033482 | Tumor_G2 |

|      |          |             |          |
|------|----------|-------------|----------|
| 6439 | UQCC3    | 4.703931615 | Tumor_G2 |
| 6440 | COX15    | 4.793140322 | Tumor_G2 |
| 6441 | COX5A    | 6.896005503 | Tumor_G2 |
| 6442 | COX6B1   | 8.660903676 | Tumor_G2 |
| 6443 | COX6C    | 6.548226602 | Tumor_G2 |
| 6444 | COX7A2   | 6.797618679 | Tumor_G2 |
| 6445 | COX7B    | 6.087379522 | Tumor_G2 |
| 6446 | COX8A    | 9.618080146 | Tumor_G2 |
| 6447 | SCO1     | 3.328430974 | Tumor_G2 |
| 6448 | SURF1    | 6.440935771 | Tumor_G2 |
| 6449 | ATP6V1E1 | 6.591566669 | Tumor_G2 |
| 6450 | DLAT     | 4.77000134  | Tumor_G2 |
| 6451 | PDC      | 0.170558492 | Tumor_G2 |
| 6452 | SUCLG2   | 5.869435997 | Tumor_G2 |
| 6453 | SLC25A5  | 8.076857927 | Tumor_G2 |
| 6454 | UCP2     | 7.394233921 | Tumor_G2 |
| 6455 | SOD2     | 4.593677352 | Tumor_G2 |
| 6456 | NOX4     | 1.961375571 | Tumor_G2 |
| 6457 | DUOX1    | 7.908587972 | Tumor_G2 |
| 6458 | DUOXA1   | 7.763221298 | Tumor_G2 |
| 6459 | DUOX2    | 9.021905404 | Tumor_G2 |
| 6460 | DUOXA2   | 6.496012438 | Tumor_G2 |
| 6461 | NDUFA1   | 8.291593069 | Tumor_G2 |
| 6462 | NDUFA2   | 6.882442383 | Tumor_G2 |
| 6463 | NDUFA8   | 7.249136126 | Tumor_G2 |
| 6464 | NDUFB1   | 5.953109989 | Tumor_G2 |
| 6465 | NDUFB10  | 7.571944318 | Tumor_G2 |
| 6466 | NDUFB2   | 6.598976871 | Tumor_G2 |
| 6467 | NDUFB3   | 6.463448278 | Tumor_G2 |
| 6468 | NDUFB7   | 8.895498481 | Tumor_G2 |
| 6469 | CYC1     | 6.955830448 | Tumor_G2 |
| 6470 | ETFB     | 4.897022395 | Tumor_G2 |
| 6471 | UQCR10   | 7.799666479 | Tumor_G2 |
| 6472 | UQCRQ    | 7.415649958 | Tumor_G2 |
| 6473 | UQCC3    | 4.607014259 | Tumor_G2 |
| 6474 | COX15    | 4.61498426  | Tumor_G2 |
| 6475 | COX5A    | 7.001834441 | Tumor_G2 |
| 6476 | COX6B1   | 8.874503408 | Tumor_G2 |
| 6477 | COX6C    | 6.709941982 | Tumor_G2 |
| 6478 | COX7A2   | 7.164279896 | Tumor_G2 |

|      |          |             |          |
|------|----------|-------------|----------|
| 6479 | COX7B    | 6.359692545 | Tumor_G2 |
| 6480 | COX8A    | 9.818547591 | Tumor_G2 |
| 6481 | SCO1     | 3.274575292 | Tumor_G2 |
| 6482 | SURF1    | 6.714364261 | Tumor_G2 |
| 6483 | ATP6V1E1 | 7.000731105 | Tumor_G2 |
| 6484 | DLAT     | 4.898270505 | Tumor_G2 |
| 6485 | PDC      | 0.3131167   | Tumor_G2 |
| 6486 | SUCLG2   | 6.107274144 | Tumor_G2 |
| 6487 | SLC25A5  | 8.308557114 | Tumor_G2 |
| 6488 | UCP2     | 7.513311652 | Tumor_G2 |
| 6489 | SOD2     | 4.503528491 | Tumor_G2 |
| 6490 | NOX4     | 2.61980098  | Tumor_G2 |
| 6491 | DUOX1    | 7.42284498  | Tumor_G2 |
| 6492 | DUOXA1   | 7.413172181 | Tumor_G2 |
| 6493 | DUOX2    | 8.033689565 | Tumor_G2 |
| 6494 | DUOXA2   | 5.411245892 | Tumor_G2 |
| 6495 | NDUFA1   | 7.830680211 | Tumor_G2 |
| 6496 | NDUFA2   | 6.754689348 | Tumor_G2 |
| 6497 | NDUFA8   | 6.881705066 | Tumor_G2 |
| 6498 | NDUFB1   | 5.503914705 | Tumor_G2 |
| 6499 | NDUFB10  | 7.327850346 | Tumor_G2 |
| 6500 | NDUFB2   | 6.584093524 | Tumor_G2 |
| 6501 | NDUFB3   | 6.228021216 | Tumor_G2 |
| 6502 | NDUFB7   | 8.42188338  | Tumor_G2 |
| 6503 | CYC1     | 7.02099726  | Tumor_G2 |
| 6504 | ETFB     | 4.608646574 | Tumor_G2 |
| 6505 | UQCR10   | 7.620625396 | Tumor_G2 |
| 6506 | UQCRQ    | 7.039564331 | Tumor_G2 |
| 6507 | UQCC3    | 4.158808801 | Tumor_G2 |
| 6508 | COX15    | 5.214370362 | Tumor_G2 |
| 6509 | COX5A    | 6.966311727 | Tumor_G2 |
| 6510 | COX6B1   | 8.557674576 | Tumor_G2 |
| 6511 | COX6C    | 6.458900882 | Tumor_G2 |
| 6512 | COX7A2   | 6.90415852  | Tumor_G2 |
| 6513 | COX7B    | 5.994879227 | Tumor_G2 |
| 6514 | COX8A    | 9.483040292 | Tumor_G2 |
| 6515 | SCO1     | 3.262452365 | Tumor_G2 |
| 6516 | SURF1    | 6.056116743 | Tumor_G2 |
| 6517 | ATP6V1E1 | 7.283597585 | Tumor_G2 |
| 6518 | DLAT     | 5.153458102 | Tumor_G2 |

|      |          |             |          |
|------|----------|-------------|----------|
| 6519 | PDC      | 0.144811632 | Tumor_G2 |
| 6520 | SUCLG2   | 6.754934167 | Tumor_G2 |
| 6521 | SLC25A5  | 8.445455245 | Tumor_G2 |
| 6522 | UCP2     | 8.184565708 | Tumor_G2 |
| 6523 | SOD2     | 4.972504382 | Tumor_G2 |
| 6524 | NOX4     | 1.780388953 | Tumor_G2 |
| 6525 | DUOX1    | 6.768805341 | Tumor_G2 |
| 6526 | DUOXA1   | 6.745477122 | Tumor_G2 |
| 6527 | DUOX2    | 6.938747221 | Tumor_G2 |
| 6528 | DUOXA2   | 4.770525275 | Tumor_G2 |
| 6529 | NDUFA1   | 7.980287906 | Tumor_G2 |
| 6530 | NDUFA2   | 6.625958482 | Tumor_G2 |
| 6531 | NDUFA8   | 7.061432213 | Tumor_G2 |
| 6532 | NDUFB1   | 5.80487315  | Tumor_G2 |
| 6533 | NDUFB10  | 7.283613747 | Tumor_G2 |
| 6534 | NDUFB2   | 6.281646264 | Tumor_G2 |
| 6535 | NDUFB3   | 6.234772701 | Tumor_G2 |
| 6536 | NDUFB7   | 8.529079368 | Tumor_G2 |
| 6537 | CYC1     | 6.938848208 | Tumor_G2 |
| 6538 | ETFB     | 4.514564758 | Tumor_G2 |
| 6539 | UQCR10   | 7.346090307 | Tumor_G2 |
| 6540 | UQCRQ    | 7.141285086 | Tumor_G2 |
| 6541 | UQCC3    | 4.469831905 | Tumor_G2 |
| 6542 | COX15    | 4.736277387 | Tumor_G2 |
| 6543 | COX5A    | 6.673706303 | Tumor_G2 |
| 6544 | COX6B1   | 8.597259268 | Tumor_G2 |
| 6545 | COX6C    | 6.501941857 | Tumor_G2 |
| 6546 | COX7A2   | 6.783949094 | Tumor_G2 |
| 6547 | COX7B    | 6.080780424 | Tumor_G2 |
| 6548 | COX8A    | 9.26635688  | Tumor_G2 |
| 6549 | SCO1     | 3.328676801 | Tumor_G2 |
| 6550 | SURF1    | 5.956950607 | Tumor_G2 |
| 6551 | ATP6V1E1 | 6.677428284 | Tumor_G2 |
| 6552 | DLAT     | 4.848596547 | Tumor_G2 |
| 6553 | PDC      | 0.436504484 | Tumor_G2 |
| 6554 | SUCLG2   | 5.874862353 | Tumor_G2 |
| 6555 | SLC25A5  | 8.144283922 | Tumor_G2 |
| 6556 | UCP2     | 6.772623721 | Tumor_G2 |
| 6557 | SOD2     | 4.749740961 | Tumor_G2 |
| 6558 | NOX4     | 3.132656446 | Tumor_G2 |

|      |          |             |          |
|------|----------|-------------|----------|
| 6559 | DUOX1    | 6.959596201 | Tumor_G2 |
| 6560 | DUOXA1   | 6.890623153 | Tumor_G2 |
| 6561 | DUOX2    | 7.253055549 | Tumor_G2 |
| 6562 | DUOXA2   | 5.223149015 | Tumor_G2 |
| 6563 | NDUFA1   | 7.921765562 | Tumor_G2 |
| 6564 | NDUFA2   | 6.353541626 | Tumor_G2 |
| 6565 | NDUFA8   | 7.016572504 | Tumor_G2 |
| 6566 | NDUFB1   | 5.535599618 | Tumor_G2 |
| 6567 | NDUFB10  | 7.3686555   | Tumor_G2 |
| 6568 | NDUFB2   | 5.786948473 | Tumor_G2 |
| 6569 | NDUFB3   | 6.022085823 | Tumor_G2 |
| 6570 | NDUFB7   | 8.231908554 | Tumor_G2 |
| 6571 | CYC1     | 6.582805509 | Tumor_G2 |
| 6572 | ETFB     | 4.85803416  | Tumor_G2 |
| 6573 | UQCR10   | 6.720999029 | Tumor_G2 |
| 6574 | UQCRQ    | 6.873770102 | Tumor_G2 |
| 6575 | UQCC3    | 4.31402057  | Tumor_G2 |
| 6576 | COX15    | 4.794525503 | Tumor_G2 |
| 6577 | COX5A    | 6.646774964 | Tumor_G2 |
| 6578 | COX6B1   | 8.348001876 | Tumor_G2 |
| 6579 | COX6C    | 6.154489113 | Tumor_G2 |
| 6580 | COX7A2   | 6.487269793 | Tumor_G2 |
| 6581 | COX7B    | 5.770629786 | Tumor_G2 |
| 6582 | COX8A    | 9.12397858  | Tumor_G2 |
| 6583 | SCO1     | 3.270295016 | Tumor_G2 |
| 6584 | SURF1    | 6.45610489  | Tumor_G2 |
| 6585 | ATP6V1E1 | 5.951006425 | Tumor_G2 |
| 6586 | DLAT     | 4.892055646 | Tumor_G2 |
| 6587 | PDC      | 0.062271429 | Tumor_G2 |
| 6588 | SUCLG2   | 5.80857086  | Tumor_G2 |
| 6589 | SLC25A5  | 7.466337665 | Tumor_G2 |
| 6590 | UCP2     | 8.54342323  | Tumor_G2 |
| 6591 | SOD2     | 4.545862203 | Tumor_G2 |
| 6592 | NOX4     | 1.770801884 | Tumor_G2 |
| 6593 | DUOX1    | 7.099169808 | Tumor_G2 |
| 6594 | DUOXA1   | 7.289301634 | Tumor_G2 |
| 6595 | DUOX2    | 8.521192469 | Tumor_G2 |
| 6596 | DUOXA2   | 5.891035246 | Tumor_G2 |
| 6597 | NDUFA1   | 8.281263649 | Tumor_G2 |
| 6598 | NDUFA2   | 6.804311921 | Tumor_G2 |

|      |          |             |          |
|------|----------|-------------|----------|
| 6599 | NDUFA8   | 7.183964015 | Tumor_G2 |
| 6600 | NDUFB1   | 6.166517507 | Tumor_G2 |
| 6601 | NDUFB10  | 7.716341553 | Tumor_G2 |
| 6602 | NDUFB2   | 6.816849453 | Tumor_G2 |
| 6603 | NDUFB3   | 6.590415625 | Tumor_G2 |
| 6604 | NDUFB7   | 8.896329741 | Tumor_G2 |
| 6605 | CYC1     | 6.999227371 | Tumor_G2 |
| 6606 | ETFB     | 5.008584748 | Tumor_G2 |
| 6607 | UQCR10   | 7.705732195 | Tumor_G2 |
| 6608 | UQCRQ    | 7.520795598 | Tumor_G2 |
| 6609 | UQCC3    | 4.454898296 | Tumor_G2 |
| 6610 | COX15    | 4.843130526 | Tumor_G2 |
| 6611 | COX5A    | 6.815413543 | Tumor_G2 |
| 6612 | COX6B1   | 8.776259623 | Tumor_G2 |
| 6613 | COX6C    | 6.792845639 | Tumor_G2 |
| 6614 | COX7A2   | 6.973489485 | Tumor_G2 |
| 6615 | COX7B    | 6.330741251 | Tumor_G2 |
| 6616 | COX8A    | 9.417367732 | Tumor_G2 |
| 6617 | SCO1     | 3.415327461 | Tumor_G2 |
| 6618 | SURF1    | 6.494455894 | Tumor_G2 |
| 6619 | ATP6V1E1 | 6.711696743 | Tumor_G2 |
| 6620 | DLAT     | 4.706856162 | Tumor_G2 |
| 6621 | PDC      | 0.315528835 | Tumor_G2 |
| 6622 | SUCLG2   | 6.124172568 | Tumor_G2 |
| 6623 | SLC25A5  | 7.737721621 | Tumor_G2 |
| 6624 | UCP2     | 7.696248121 | Tumor_G2 |
| 6625 | SOD2     | 4.674924257 | Tumor_G2 |
| 6626 | NOX4     | 2.143643321 | Tumor_G2 |
| 6627 | DUOX1    | 7.397855714 | Tumor_G2 |
| 6628 | DUOXA1   | 7.37623261  | Tumor_G2 |
| 6629 | DUOX2    | 8.550680034 | Tumor_G2 |
| 6630 | DUOXA2   | 5.93889724  | Tumor_G2 |
| 6631 | NDUFA1   | 8.390826973 | Tumor_G2 |
| 6632 | NDUFA2   | 7.230361152 | Tumor_G2 |
| 6633 | NDUFA8   | 7.272438744 | Tumor_G2 |
| 6634 | NDUFB1   | 5.925178272 | Tumor_G2 |
| 6635 | NDUFB10  | 8.032970366 | Tumor_G2 |
| 6636 | NDUFB2   | 6.665730132 | Tumor_G2 |
| 6637 | NDUFB3   | 6.415666105 | Tumor_G2 |
| 6638 | NDUFB7   | 8.881582548 | Tumor_G2 |

|      |          |             |          |
|------|----------|-------------|----------|
| 6639 | CYC1     | 7.778036671 | Tumor_G2 |
| 6640 | ETFB     | 5.923405529 | Tumor_G2 |
| 6641 | UQCR10   | 8.120101406 | Tumor_G2 |
| 6642 | UQCRQ    | 7.513112149 | Tumor_G2 |
| 6643 | UQCC3    | 4.705555884 | Tumor_G2 |
| 6644 | COX15    | 5.442811755 | Tumor_G2 |
| 6645 | COX5A    | 7.777791351 | Tumor_G2 |
| 6646 | COX6B1   | 8.722093847 | Tumor_G2 |
| 6647 | COX6C    | 7.111538785 | Tumor_G2 |
| 6648 | COX7A2   | 7.176118553 | Tumor_G2 |
| 6649 | COX7B    | 6.467701623 | Tumor_G2 |
| 6650 | COX8A    | 10.10207167 | Tumor_G2 |
| 6651 | SCO1     | 3.833996711 | Tumor_G2 |
| 6652 | SURF1    | 6.726222702 | Tumor_G2 |
| 6653 | ATP6V1E1 | 6.811945498 | Tumor_G2 |
| 6654 | DLAT     | 5.743271929 | Tumor_G2 |
| 6655 | PDC      | 0.385588935 | Tumor_G2 |
| 6656 | SUCLG2   | 6.560774519 | Tumor_G2 |
| 6657 | SLC25A5  | 8.33990131  | Tumor_G2 |
| 6658 | UCP2     | 8.481121106 | Tumor_G2 |
| 6659 | SOD2     | 4.823844435 | Tumor_G2 |
| 6660 | NOX4     | 1.707420227 | Tumor_G2 |
| 6661 | DUOX1    | 7.896649234 | Tumor_G2 |
| 6662 | DUOXA1   | 6.543269429 | Tumor_G2 |
| 6663 | DUOX2    | 9.384251444 | Tumor_G2 |
| 6664 | DUOXA2   | 8.466598915 | Tumor_G2 |
| 6665 | NDUFA1   | 8.30057349  | Tumor_G2 |
| 6666 | NDUFA2   | 7.033833992 | Tumor_G2 |
| 6667 | NDUFA8   | 7.347996397 | Tumor_G2 |
| 6668 | NDUFB1   | 5.817141953 | Tumor_G2 |
| 6669 | NDUFB10  | 7.798599582 | Tumor_G2 |
| 6670 | NDUFB2   | 6.842288365 | Tumor_G2 |
| 6671 | NDUFB3   | 6.569824063 | Tumor_G2 |
| 6672 | NDUFB7   | 8.817298208 | Tumor_G2 |
| 6673 | CYC1     | 6.941888423 | Tumor_G2 |
| 6674 | ETFB     | 5.035737508 | Tumor_G2 |
| 6675 | UQCR10   | 8.08931231  | Tumor_G2 |
| 6676 | UQCRQ    | 7.6126464   | Tumor_G2 |
| 6677 | UQCC3    | 4.531503173 | Tumor_G2 |
| 6678 | COX15    | 4.873670636 | Tumor_G2 |

|      |          |             |          |
|------|----------|-------------|----------|
| 6679 | COX5A    | 7.414587952 | Tumor_G2 |
| 6680 | COX6B1   | 9.031363694 | Tumor_G2 |
| 6681 | COX6C    | 6.731299787 | Tumor_G2 |
| 6682 | COX7A2   | 7.357597944 | Tumor_G2 |
| 6683 | COX7B    | 6.378831782 | Tumor_G2 |
| 6684 | COX8A    | 9.524001566 | Tumor_G2 |
| 6685 | SCO1     | 3.543699771 | Tumor_G2 |
| 6686 | SURF1    | 6.757695088 | Tumor_G2 |
| 6687 | ATP6V1E1 | 7.591672281 | Tumor_G2 |
| 6688 | DLAT     | 5.341544137 | Tumor_G2 |
| 6689 | PDC      | 0           | Tumor_G2 |
| 6690 | SUCLG2   | 6.826108971 | Tumor_G2 |
| 6691 | SLC25A5  | 8.445407805 | Tumor_G2 |
| 6692 | UCP2     | 8.671042178 | Tumor_G2 |
| 6693 | SOD2     | 5.473919038 | Tumor_G2 |
| 6694 | NOX4     | 3.409517343 | Tumor_G2 |
| 6695 | DUOX1    | 5.860263684 | Tumor_G2 |
| 6696 | DUOXA1   | 6.326124924 | Tumor_G2 |
| 6697 | DUOX2    | 6.511752773 | Tumor_G2 |
| 6698 | DUOXA2   | 4.527061072 | Tumor_G2 |
| 6699 | NDUFA1   | 8.391224615 | Tumor_G2 |
| 6700 | NDUFA2   | 6.950560073 | Tumor_G2 |
| 6701 | NDUFA8   | 7.262089165 | Tumor_G2 |
| 6702 | NDUFB1   | 6.074275822 | Tumor_G2 |
| 6703 | NDUFB10  | 7.803600488 | Tumor_G2 |
| 6704 | NDUFB2   | 6.608813122 | Tumor_G2 |
| 6705 | NDUFB3   | 6.350685088 | Tumor_G2 |
| 6706 | NDUFB7   | 9.019967487 | Tumor_G2 |
| 6707 | CYC1     | 6.880598267 | Tumor_G2 |
| 6708 | ETFB     | 5.049477178 | Tumor_G2 |
| 6709 | UQCR10   | 7.821383354 | Tumor_G2 |
| 6710 | UQCRQ    | 7.634261912 | Tumor_G2 |
| 6711 | UQCC3    | 4.520290309 | Tumor_G2 |
| 6712 | COX15    | 4.865575041 | Tumor_G2 |
| 6713 | COX5A    | 6.933116507 | Tumor_G2 |
| 6714 | COX6B1   | 8.878601138 | Tumor_G2 |
| 6715 | COX6C    | 6.74101338  | Tumor_G2 |
| 6716 | COX7A2   | 6.94420012  | Tumor_G2 |
| 6717 | COX7B    | 6.317784581 | Tumor_G2 |
| 6718 | COX8A    | 9.507964987 | Tumor_G2 |



|      |          |             |          |
|------|----------|-------------|----------|
| 6719 | SCO1     | 3.484321769 | Tumor_G2 |
| 6720 | SURF1    | 6.61276817  | Tumor_G2 |
| 6721 | ATP6V1E1 | 6.872230242 | Tumor_G2 |
| 6722 | DLAT     | 4.830047902 | Tumor_G2 |
| 6723 | PDC      | 0.14678749  | Tumor_G2 |
| 6724 | SUCLG2   | 6.427839505 | Tumor_G2 |
| 6725 | SLC25A5  | 7.758513592 | Tumor_G2 |
| 6726 | UCP2     | 7.69540161  | Tumor_G2 |
| 6727 | SOD2     | 4.768355512 | Tumor_G2 |
| 6728 | NOX4     | 2.65916389  | Tumor_G2 |
| 6729 | DUOX1    | 7.456417374 | Tumor_G2 |
| 6730 | DUOXA1   | 7.32953976  | Tumor_G2 |
| 6731 | DUOX2    | 8.405251662 | Tumor_G2 |
| 6732 | DUOXA2   | 5.968029083 | Tumor_G2 |
| 6733 | NDUFA1   | 8.208396709 | Tumor_G2 |
| 6734 | NDUFA2   | 7.170505558 | Tumor_G2 |
| 6735 | NDUFA8   | 7.150424543 | Tumor_G2 |
| 6736 | NDUFB1   | 5.863254916 | Tumor_G2 |
| 6737 | NDUFB10  | 7.831819879 | Tumor_G2 |
| 6738 | NDUFB2   | 6.849819585 | Tumor_G2 |
| 6739 | NDUFB3   | 6.212917122 | Tumor_G2 |
| 6740 | NDUFB7   | 9.144579772 | Tumor_G2 |
| 6741 | CYC1     | 6.870225382 | Tumor_G2 |
| 6742 | ETFB     | 5.291363368 | Tumor_G2 |
| 6743 | UQCR10   | 7.815178748 | Tumor_G2 |
| 6744 | UQCRQ    | 7.453751692 | Tumor_G2 |
| 6745 | UQCC3    | 4.86118152  | Tumor_G2 |
| 6746 | COX15    | 4.582542285 | Tumor_G2 |
| 6747 | COX5A    | 7.160665927 | Tumor_G2 |
| 6748 | COX6B1   | 8.986317548 | Tumor_G2 |
| 6749 | COX6C    | 6.689374581 | Tumor_G2 |
| 6750 | COX7A2   | 6.866448942 | Tumor_G2 |
| 6751 | COX7B    | 6.12471314  | Tumor_G2 |
| 6752 | COX8A    | 9.69251156  | Tumor_G2 |
| 6753 | SCO1     | 3.121212959 | Tumor_G2 |
| 6754 | SURF1    | 6.35331576  | Tumor_G2 |
| 6755 | ATP6V1E1 | 6.998206457 | Tumor_G2 |
| 6756 | DLAT     | 4.56213517  | Tumor_G2 |
| 6757 | PDC      | 0.056694399 | Tumor_G2 |
| 6758 | SUCLG2   | 5.898279589 | Tumor_G2 |

|      |          |             |          |
|------|----------|-------------|----------|
| 6759 | SLC25A5  | 7.939304667 | Tumor_G2 |
| 6760 | UCP2     | 7.979422569 | Tumor_G2 |
| 6761 | SOD2     | 4.882224173 | Tumor_G2 |
| 6762 | NOX4     | 2.346216974 | Tumor_G2 |
| 6763 | DUOX1    | 5.862604406 | Tumor_G2 |
| 6764 | DUOXA1   | 6.043362386 | Tumor_G2 |
| 6765 | DUOX2    | 5.971464111 | Tumor_G2 |
| 6766 | DUOXA2   | 5.572773619 | Tumor_G2 |
| 6767 | NDUFA1   | 8.37175731  | Tumor_G2 |
| 6768 | NDUFA2   | 6.826975413 | Tumor_G2 |
| 6769 | NDUFA8   | 7.243018193 | Tumor_G2 |
| 6770 | NDUFB1   | 5.912173991 | Tumor_G2 |
| 6771 | NDUFB10  | 7.499089715 | Tumor_G2 |
| 6772 | NDUFB2   | 6.568819172 | Tumor_G2 |
| 6773 | NDUFB3   | 6.508388979 | Tumor_G2 |
| 6774 | NDUFB7   | 8.966529373 | Tumor_G2 |
| 6775 | CYC1     | 6.931933481 | Tumor_G2 |
| 6776 | ETFB     | 5.701516016 | Tumor_G2 |
| 6777 | UQCR10   | 7.887185441 | Tumor_G2 |
| 6778 | UQCRQ    | 7.348026049 | Tumor_G2 |
| 6779 | UQCC3    | 4.854574565 | Tumor_G2 |
| 6780 | COX15    | 5.034174329 | Tumor_G2 |
| 6781 | COX5A    | 6.988534384 | Tumor_G2 |
| 6782 | COX6B1   | 8.64768517  | Tumor_G2 |
| 6783 | COX6C    | 6.61222913  | Tumor_G2 |
| 6784 | COX7A2   | 6.862569273 | Tumor_G2 |
| 6785 | COX7B    | 6.283603466 | Tumor_G2 |
| 6786 | COX8A    | 9.591656412 | Tumor_G2 |
| 6787 | SCO1     | 3.389008529 | Tumor_G2 |
| 6788 | SURF1    | 6.550083273 | Tumor_G2 |
| 6789 | ATP6V1E1 | 6.992517753 | Tumor_G2 |
| 6790 | DLAT     | 5.418364653 | Tumor_G2 |
| 6791 | PDC      | 0.058253609 | Tumor_G2 |
| 6792 | SUCLG2   | 6.007884368 | Tumor_G2 |
| 6793 | SLC25A5  | 7.578103162 | Tumor_G2 |
| 6794 | UCP2     | 9.377251304 | Tumor_G2 |
| 6795 | SOD2     | 4.627938752 | Tumor_G2 |
| 6796 | NOX4     | 2.736762651 | Tumor_G2 |
| 6797 | DUOX1    | 8.150641202 | Tumor_G2 |
| 6798 | DUOXA1   | 7.990625758 | Tumor_G2 |

|      |          |             |          |
|------|----------|-------------|----------|
| 6799 | DUOX2    | 8.871059575 | Tumor_G2 |
| 6800 | DUOXA2   | 6.866702691 | Tumor_G2 |
| 6801 | NDUFA1   | 7.548637158 | Tumor_G2 |
| 6802 | NDUFA2   | 6.745544106 | Tumor_G2 |
| 6803 | NDUFA8   | 7.364592358 | Tumor_G2 |
| 6804 | NDUFB1   | 5.678336387 | Tumor_G2 |
| 6805 | NDUFB10  | 7.538721063 | Tumor_G2 |
| 6806 | NDUFB2   | 6.927807555 | Tumor_G2 |
| 6807 | NDUFB3   | 6.217491116 | Tumor_G2 |
| 6808 | NDUFB7   | 8.574907838 | Tumor_G2 |
| 6809 | CYC1     | 7.1466125   | Tumor_G2 |
| 6810 | ETFB     | 5.230086204 | Tumor_G2 |
| 6811 | UQCR10   | 7.635494049 | Tumor_G2 |
| 6812 | UQCRQ    | 7.565416008 | Tumor_G2 |
| 6813 | UQCC3    | 4.443211908 | Tumor_G2 |
| 6814 | COX15    | 4.834844554 | Tumor_G2 |
| 6815 | COX5A    | 7.374453983 | Tumor_G2 |
| 6816 | COX6B1   | 8.728589247 | Tumor_G2 |
| 6817 | COX6C    | 6.534522197 | Tumor_G2 |
| 6818 | COX7A2   | 7.023738345 | Tumor_G2 |
| 6819 | COX7B    | 6.361074948 | Tumor_G2 |
| 6820 | COX8A    | 10.27177545 | Tumor_G2 |
| 6821 | SCO1     | 3.307217455 | Tumor_G2 |
| 6822 | SURF1    | 5.795143329 | Tumor_G2 |
| 6823 | ATP6V1E1 | 7.186166804 | Tumor_G2 |
| 6824 | DLAT     | 5.145186311 | Tumor_G2 |
| 6825 | PDC      | 0.186588095 | Tumor_G2 |
| 6826 | SUCLG2   | 6.672494289 | Tumor_G2 |
| 6827 | SLC25A5  | 8.620764913 | Tumor_G2 |
| 6828 | UCP2     | 6.966088665 | Tumor_G2 |
| 6829 | SOD2     | 4.344692938 | Tumor_G2 |
| 6830 | NOX4     | 2.179537544 | Tumor_G2 |
| 6831 | DUOX1    | 7.620847331 | Tumor_G2 |
| 6832 | DUOXA1   | 7.19675979  | Tumor_G2 |
| 6833 | DUOX2    | 8.165402407 | Tumor_G2 |
| 6834 | DUOXA2   | 6.004022914 | Tumor_G2 |
| 6835 | NDUFA1   | 7.870854258 | Tumor_G2 |
| 6836 | NDUFA2   | 6.589495423 | Tumor_G2 |
| 6837 | NDUFA8   | 7.098686381 | Tumor_G2 |
| 6838 | NDUFB1   | 5.447250206 | Tumor_G2 |

|      |          |             |          |
|------|----------|-------------|----------|
| 6839 | NDUFB10  | 7.475698989 | Tumor_G2 |
| 6840 | NDUFB2   | 6.457853277 | Tumor_G2 |
| 6841 | NDUFB3   | 6.272930131 | Tumor_G2 |
| 6842 | NDUFB7   | 8.565038676 | Tumor_G2 |
| 6843 | CYC1     | 6.964331782 | Tumor_G2 |
| 6844 | ETFB     | 5.300567323 | Tumor_G2 |
| 6845 | UQCR10   | 6.814315907 | Tumor_G2 |
| 6846 | UQCRQ    | 7.080974726 | Tumor_G2 |
| 6847 | UQCC3    | 4.423717475 | Tumor_G2 |
| 6848 | COX15    | 5.273272406 | Tumor_G2 |
| 6849 | COX5A    | 6.892749636 | Tumor_G2 |
| 6850 | COX6B1   | 8.393971287 | Tumor_G2 |
| 6851 | COX6C    | 6.431883247 | Tumor_G2 |
| 6852 | COX7A2   | 6.767011542 | Tumor_G2 |
| 6853 | COX7B    | 6.088509333 | Tumor_G2 |
| 6854 | COX8A    | 9.573014642 | Tumor_G2 |
| 6855 | SCO1     | 3.712179511 | Tumor_G2 |
| 6856 | SURF1    | 6.437033655 | Tumor_G2 |
| 6857 | ATP6V1E1 | 6.375533626 | Tumor_G2 |
| 6858 | DLAT     | 5.622524191 | Tumor_G2 |
| 6859 | PDC      | 0           | Tumor_G2 |
| 6860 | SUCLG2   | 6.579357008 | Tumor_G2 |
| 6861 | SLC25A5  | 8.149976552 | Tumor_G2 |
| 6862 | UCP2     | 8.728047224 | Tumor_G2 |
| 6863 | SOD2     | 4.90551264  | Tumor_G2 |
| 6864 | NOX4     | 1.952840255 | Tumor_G2 |
| 6865 | DUOX1    | 6.979790571 | Tumor_G2 |
| 6866 | DUOXA1   | 7.105336081 | Tumor_G2 |
| 6867 | DUOX2    | 8.562911676 | Tumor_G2 |
| 6868 | DUOXA2   | 5.31493098  | Tumor_G2 |
| 6869 | NDUFA1   | 7.658265316 | Tumor_G2 |
| 6870 | NDUFA2   | 6.602191911 | Tumor_G2 |
| 6871 | NDUFA8   | 7.171857886 | Tumor_G2 |
| 6872 | NDUFB1   | 5.216195689 | Tumor_G2 |
| 6873 | NDUFB10  | 7.591949619 | Tumor_G2 |
| 6874 | NDUFB2   | 6.172273317 | Tumor_G2 |
| 6875 | NDUFB3   | 5.846476251 | Tumor_G2 |
| 6876 | NDUFB7   | 8.662864261 | Tumor_G2 |
| 6877 | CYC1     | 6.743149424 | Tumor_G2 |
| 6878 | ETFB     | 5.226272086 | Tumor_G2 |

|      |          |             |          |
|------|----------|-------------|----------|
| 6879 | UQCR10   | 7.484332283 | Tumor_G2 |
| 6880 | UQCRQ    | 6.951450692 | Tumor_G2 |
| 6881 | UQCC3    | 4.758408991 | Tumor_G2 |
| 6882 | COX15    | 4.833348992 | Tumor_G2 |
| 6883 | COX5A    | 6.915760394 | Tumor_G2 |
| 6884 | COX6B1   | 8.580603861 | Tumor_G2 |
| 6885 | COX6C    | 6.235920367 | Tumor_G2 |
| 6886 | COX7A2   | 6.571876939 | Tumor_G2 |
| 6887 | COX7B    | 5.898308897 | Tumor_G2 |
| 6888 | COX8A    | 9.334740281 | Tumor_G2 |
| 6889 | SCO1     | 3.201347289 | Tumor_G2 |
| 6890 | SURF1    | 6.795805309 | Tumor_G2 |
| 6891 | ATP6V1E1 | 6.906806523 | Tumor_G2 |
| 6892 | DLAT     | 4.955672082 | Tumor_G2 |
| 6893 | PDC      | 0.075236294 | Tumor_G2 |
| 6894 | SUCLG2   | 6.090808383 | Tumor_G2 |
| 6895 | SLC25A5  | 7.196769435 | Tumor_G2 |
| 6896 | UCP2     | 9.441846296 | Tumor_G2 |
| 6897 | SOD2     | 4.731055046 | Tumor_G2 |
| 6898 | NOX4     | 2.927598494 | Tumor_G2 |
| 6899 | DUOX1    | 6.100162543 | Tumor_G2 |
| 6900 | DUOXA1   | 6.60609387  | Tumor_G2 |
| 6901 | DUOX2    | 7.482236262 | Tumor_G2 |
| 6902 | DUOXA2   | 5.880217306 | Tumor_G2 |
| 6903 | NDUFA1   | 7.807936967 | Tumor_G2 |
| 6904 | NDUFA2   | 6.488876842 | Tumor_G2 |
| 6905 | NDUFA8   | 6.924460788 | Tumor_G2 |
| 6906 | NDUFB1   | 5.387421803 | Tumor_G2 |
| 6907 | NDUFB10  | 7.389637587 | Tumor_G2 |
| 6908 | NDUFB2   | 6.802666525 | Tumor_G2 |
| 6909 | NDUFB3   | 6.267115817 | Tumor_G2 |
| 6910 | NDUFB7   | 8.650647248 | Tumor_G2 |
| 6911 | CYC1     | 7.057584928 | Tumor_G2 |
| 6912 | ETFB     | 5.258522728 | Tumor_G2 |
| 6913 | UQCR10   | 7.645582636 | Tumor_G2 |
| 6914 | UQCRQ    | 7.002503266 | Tumor_G2 |
| 6915 | UQCC3    | 4.378075695 | Tumor_G2 |
| 6916 | COX15    | 5.24915378  | Tumor_G2 |
| 6917 | COX5A    | 6.871794767 | Tumor_G2 |
| 6918 | COX6B1   | 8.467789544 | Tumor_G2 |

|      |          |             |          |
|------|----------|-------------|----------|
| 6919 | COX6C    | 6.349253742 | Tumor_G2 |
| 6920 | COX7A2   | 6.623402964 | Tumor_G2 |
| 6921 | COX7B    | 5.800061628 | Tumor_G2 |
| 6922 | COX8A    | 9.734131614 | Tumor_G2 |
| 6923 | SCO1     | 3.478348563 | Tumor_G2 |
| 6924 | SURF1    | 6.76799265  | Tumor_G2 |
| 6925 | ATP6V1E1 | 7.058775257 | Tumor_G2 |
| 6926 | DLAT     | 5.381874965 | Tumor_G2 |
| 6927 | PDC      | 0.063482519 | Tumor_G2 |
| 6928 | SUCLG2   | 6.348879046 | Tumor_G2 |
| 6929 | SLC25A5  | 8.021316146 | Tumor_G2 |
| 6930 | UCP2     | 9.119069557 | Tumor_G2 |
| 6931 | SOD2     | 4.961496253 | Tumor_G2 |
| 6932 | NOX4     | 1.282593787 | Tumor_G2 |
| 6933 | DUOX1    | 7.705023527 | Tumor_G2 |
| 6934 | DUOXA1   | 7.226106529 | Tumor_G2 |
| 6935 | DUOX2    | 7.89464583  | Tumor_G2 |
| 6936 | DUOXA2   | 5.522806668 | Tumor_G2 |
| 6937 | NDUFA1   | 8.109186322 | Tumor_G2 |
| 6938 | NDUFA2   | 6.859409197 | Tumor_G2 |
| 6939 | NDUFA8   | 7.131207136 | Tumor_G2 |
| 6940 | NDUFB1   | 5.537753157 | Tumor_G2 |
| 6941 | NDUFB10  | 7.771404405 | Tumor_G2 |
| 6942 | NDUFB2   | 6.339612905 | Tumor_G2 |
| 6943 | NDUFB3   | 6.371822013 | Tumor_G2 |
| 6944 | NDUFB7   | 8.515232747 | Tumor_G2 |
| 6945 | CYC1     | 6.892125556 | Tumor_G2 |
| 6946 | ETFB     | 4.844219634 | Tumor_G2 |
| 6947 | UQCR10   | 7.618078622 | Tumor_G2 |
| 6948 | UQCRQ    | 7.403039457 | Tumor_G2 |
| 6949 | UQCC3    | 4.000284291 | Tumor_G2 |
| 6950 | COX15    | 5.196390061 | Tumor_G2 |
| 6951 | COX5A    | 7.254741909 | Tumor_G2 |
| 6952 | COX6B1   | 8.763513176 | Tumor_G2 |
| 6953 | COX6C    | 6.405058252 | Tumor_G2 |
| 6954 | COX7A2   | 6.901396383 | Tumor_G2 |
| 6955 | COX7B    | 6.084247134 | Tumor_G2 |
| 6956 | COX8A    | 9.426418927 | Tumor_G2 |
| 6957 | SCO1     | 3.662545516 | Tumor_G2 |
| 6958 | SURF1    | 6.333795859 | Tumor_G2 |

|      |          |             |          |
|------|----------|-------------|----------|
| 6959 | ATP6V1E1 | 7.636382218 | Tumor_G2 |
| 6960 | DLAT     | 5.616697051 | Tumor_G2 |
| 6961 | PDC      | 0.152294473 | Tumor_G2 |
| 6962 | SUCLG2   | 6.918700066 | Tumor_G2 |
| 6963 | SLC25A5  | 8.830855863 | Tumor_G2 |
| 6964 | UCP2     | 8.149380865 | Tumor_G2 |
| 6965 | SOD2     | 5.672249208 | Tumor_G2 |
| 6966 | NOX4     | 2.40932288  | Tumor_G2 |
| 6967 | DUOX1    | 6.32391326  | Tumor_G2 |
| 6968 | DUOXA1   | 6.539993306 | Tumor_G2 |
| 6969 | DUOX2    | 6.263364905 | Tumor_G2 |
| 6970 | DUOXA2   | 3.227500866 | Tumor_G2 |
| 6971 | NDUFA1   | 7.812987259 | Tumor_G2 |
| 6972 | NDUFA2   | 6.724345674 | Tumor_G2 |
| 6973 | NDUFA8   | 7.236703218 | Tumor_G2 |
| 6974 | NDUFB1   | 5.754462475 | Tumor_G2 |
| 6975 | NDUFB10  | 7.532766306 | Tumor_G2 |
| 6976 | NDUFB2   | 6.582653061 | Tumor_G2 |
| 6977 | NDUFB3   | 6.501136435 | Tumor_G2 |
| 6978 | NDUFB7   | 8.624318128 | Tumor_G2 |
| 6979 | CYC1     | 6.640970239 | Tumor_G2 |
| 6980 | ETFB     | 5.150813044 | Tumor_G2 |
| 6981 | UQCR10   | 7.682457916 | Tumor_G2 |
| 6982 | UQCRQ    | 7.354235482 | Tumor_G2 |
| 6983 | UQCC3    | 4.404112648 | Tumor_G2 |
| 6984 | COX15    | 4.903193391 | Tumor_G2 |
| 6985 | COX5A    | 7.289407991 | Tumor_G2 |
| 6986 | COX6B1   | 8.582805744 | Tumor_G2 |
| 6987 | COX6C    | 6.472225271 | Tumor_G2 |
| 6988 | COX7A2   | 6.742785038 | Tumor_G2 |
| 6989 | COX7B    | 6.064590228 | Tumor_G2 |
| 6990 | COX8A    | 9.433532772 | Tumor_G2 |
| 6991 | SCO1     | 3.826828951 | Tumor_G2 |
| 6992 | SURF1    | 6.395150996 | Tumor_G2 |
| 6993 | ATP6V1E1 | 6.916504117 | Tumor_G2 |
| 6994 | DLAT     | 5.369504805 | Tumor_G2 |
| 6995 | PDC      | 0.294378572 | Tumor_G2 |
| 6996 | SUCLG2   | 6.313411813 | Tumor_G2 |
| 6997 | SLC25A5  | 7.814589343 | Tumor_G2 |
| 6998 | UCP2     | 9.340449655 | Tumor_G2 |

|      |          |             |          |
|------|----------|-------------|----------|
| 6999 | SOD2     | 4.878750698 | Tumor_G2 |
| 7000 | NOX4     | 3.06496302  | Tumor_G2 |
| 7001 | DUOX1    | 6.860358717 | Tumor_G2 |
| 7002 | DUOXA1   | 7.212394128 | Tumor_G2 |
| 7003 | DUOX2    | 8.1289439   | Tumor_G2 |
| 7004 | DUOXA2   | 5.87234288  | Tumor_G2 |
| 7005 | NDUFA1   | 8.094180831 | Tumor_G2 |
| 7006 | NDUFA2   | 6.643280227 | Tumor_G2 |
| 7007 | NDUFA8   | 7.198952542 | Tumor_G2 |
| 7008 | NDUFB1   | 5.496752039 | Tumor_G2 |
| 7009 | NDUFB10  | 7.566689542 | Tumor_G2 |
| 7010 | NDUFB2   | 6.832655515 | Tumor_G2 |
| 7011 | NDUFB3   | 6.422121448 | Tumor_G2 |
| 7012 | NDUFB7   | 8.715606304 | Tumor_G2 |
| 7013 | CYC1     | 7.200593912 | Tumor_G2 |
| 7014 | ETFB     | 5.028003987 | Tumor_G2 |
| 7015 | UQCR10   | 7.73732362  | Tumor_G2 |
| 7016 | UQCRQ    | 7.187748772 | Tumor_G2 |
| 7017 | UQCC3    | 4.109433553 | Tumor_G2 |
| 7018 | COX15    | 5.166256371 | Tumor_G2 |
| 7019 | COX5A    | 7.141161729 | Tumor_G2 |
| 7020 | COX6B1   | 8.664436295 | Tumor_G2 |
| 7021 | COX6C    | 6.537586358 | Tumor_G2 |
| 7022 | COX7A2   | 6.705072879 | Tumor_G2 |
| 7023 | COX7B    | 6.194085532 | Tumor_G2 |
| 7024 | COX8A    | 9.892132479 | Tumor_G2 |
| 7025 | SCO1     | 3.805593508 | Tumor_G2 |
| 7026 | SURF1    | 6.36595473  | Tumor_G2 |
| 7027 | ATP6V1E1 | 6.894804403 | Tumor_G2 |
| 7028 | DLAT     | 5.425853518 | Tumor_G2 |
| 7029 | PDC      | 0.130743805 | Tumor_G2 |
| 7030 | SUCLG2   | 6.182000247 | Tumor_G2 |
| 7031 | SLC25A5  | 8.233257837 | Tumor_G2 |
| 7032 | UCP2     | 8.123062054 | Tumor_G2 |
| 7033 | SOD2     | 5.332181726 | Tumor_G2 |
| 7034 | NOX4     | 2.245950332 | Tumor_G2 |
| 7035 | DUOX1    | 6.646933356 | Tumor_G2 |
| 7036 | DUOXA1   | 6.540282013 | Tumor_G2 |
| 7037 | DUOX2    | 7.073893684 | Tumor_G2 |
| 7038 | DUOXA2   | 5.460563835 | Tumor_G2 |



|      |          |             |          |
|------|----------|-------------|----------|
| 7039 | NDUFA1   | 8.218567695 | Tumor_G2 |
| 7040 | NDUFA2   | 6.671859638 | Tumor_G2 |
| 7041 | NDUFA8   | 7.400763459 | Tumor_G2 |
| 7042 | NDUFB1   | 5.819478651 | Tumor_G2 |
| 7043 | NDUFB10  | 7.842344547 | Tumor_G2 |
| 7044 | NDUFB2   | 6.520132575 | Tumor_G2 |
| 7045 | NDUFB3   | 6.462068838 | Tumor_G2 |
| 7046 | NDUFB7   | 8.806126961 | Tumor_G2 |
| 7047 | CYC1     | 7.015919858 | Tumor_G2 |
| 7048 | ETFB     | 5.840964575 | Tumor_G2 |
| 7049 | UQCR10   | 7.277602858 | Tumor_G2 |
| 7050 | UQCRQ    | 7.352572059 | Tumor_G2 |
| 7051 | UQCC3    | 4.913598647 | Tumor_G2 |
| 7052 | COX15    | 5.28699384  | Tumor_G2 |
| 7053 | COX5A    | 6.993628465 | Tumor_G2 |
| 7054 | COX6B1   | 8.762718998 | Tumor_G2 |
| 7055 | COX6C    | 6.34061336  | Tumor_G2 |
| 7056 | COX7A2   | 6.673476882 | Tumor_G2 |
| 7057 | COX7B    | 6.0026128   | Tumor_G2 |
| 7058 | COX8A    | 9.61053008  | Tumor_G2 |
| 7059 | SCO1     | 3.54635427  | Tumor_G2 |
| 7060 | SURF1    | 6.892703844 | Tumor_G2 |
| 7061 | ATP6V1E1 | 6.864915583 | Tumor_G2 |
| 7062 | DLAT     | 5.047107132 | Tumor_G2 |
| 7063 | PDC      | 0.118552018 | Tumor_G2 |
| 7064 | SUCLG2   | 6.046753979 | Tumor_G2 |
| 7065 | SLC25A5  | 7.702431029 | Tumor_G2 |
| 7066 | UCP2     | 9.142838156 | Tumor_G2 |
| 7067 | SOD2     | 4.854148278 | Tumor_G2 |
| 7068 | NOX4     | 2.513309476 | Tumor_G2 |
| 7069 | DUOX1    | 7.173057347 | Tumor_G2 |
| 7070 | DUOXA1   | 7.300899899 | Tumor_G2 |
| 7071 | DUOX2    | 8.088716554 | Tumor_G2 |
| 7072 | DUOXA2   | 5.6546819   | Tumor_G2 |
| 7073 | NDUFA1   | 7.803357863 | Tumor_G2 |
| 7074 | NDUFA2   | 6.535140909 | Tumor_G2 |
| 7075 | NDUFA8   | 6.970381904 | Tumor_G2 |
| 7076 | NDUFB1   | 5.404338324 | Tumor_G2 |
| 7077 | NDUFB10  | 7.499895603 | Tumor_G2 |
| 7078 | NDUFB2   | 6.717591758 | Tumor_G2 |

|      |          |             |          |
|------|----------|-------------|----------|
| 7079 | NDUFB3   | 6.240906174 | Tumor_G2 |
| 7080 | NDUFB7   | 8.073152798 | Tumor_G2 |
| 7081 | CYC1     | 6.875569458 | Tumor_G2 |
| 7082 | ETFB     | 4.920919053 | Tumor_G2 |
| 7083 | UQCR10   | 7.398293049 | Tumor_G2 |
| 7084 | UQCRQ    | 6.898114098 | Tumor_G2 |
| 7085 | UQCC3    | 4.256862325 | Tumor_G2 |
| 7086 | COX15    | 4.963817211 | Tumor_G2 |
| 7087 | COX5A    | 7.083694556 | Tumor_G2 |
| 7088 | COX6B1   | 8.622200257 | Tumor_G2 |
| 7089 | COX6C    | 6.176373408 | Tumor_G2 |
| 7090 | COX7A2   | 6.752112842 | Tumor_G2 |
| 7091 | COX7B    | 6.09734356  | Tumor_G2 |
| 7092 | COX8A    | 9.376670438 | Tumor_G2 |
| 7093 | SCO1     | 3.505727827 | Tumor_G2 |
| 7094 | SURF1    | 6.382395159 | Tumor_G2 |
| 7095 | ATP6V1E1 | 6.985730601 | Tumor_G2 |
| 7096 | DLAT     | 5.285244074 | Tumor_G2 |
| 7097 | PDC      | 0.157299638 | Tumor_G2 |
| 7098 | SUCLG2   | 6.381106781 | Tumor_G2 |
| 7099 | SLC25A5  | 8.682620093 | Tumor_G2 |
| 7100 | UCP2     | 8.488710922 | Tumor_G2 |
| 7101 | SOD2     | 5.197727703 | Tumor_G2 |
| 7102 | NOX4     | 1.91967578  | Tumor_G2 |
| 7103 | DUOX1    | 5.937314576 | Tumor_G2 |
| 7104 | DUOXA1   | 6.243798392 | Tumor_G2 |
| 7105 | DUOX2    | 6.712437339 | Tumor_G2 |
| 7106 | DUOXA2   | 4.761874569 | Tumor_G2 |
| 7107 | NDUFA1   | 8.077416402 | Tumor_G2 |
| 7108 | NDUFA2   | 6.689128173 | Tumor_G2 |
| 7109 | NDUFA8   | 7.628056192 | Tumor_G2 |
| 7110 | NDUFB1   | 6.379947271 | Tumor_G2 |
| 7111 | NDUFB10  | 7.53841308  | Tumor_G2 |
| 7112 | NDUFB2   | 7.334914347 | Tumor_G2 |
| 7113 | NDUFB3   | 6.576308995 | Tumor_G2 |
| 7114 | NDUFB7   | 8.555776394 | Tumor_G2 |
| 7115 | CYC1     | 7.557973874 | Tumor_G2 |
| 7116 | ETFB     | 5.221088249 | Tumor_G2 |
| 7117 | UQCR10   | 7.763452443 | Tumor_G2 |
| 7118 | UQCRQ    | 7.307084722 | Tumor_G2 |

|      |          |             |          |
|------|----------|-------------|----------|
| 7119 | UQCC3    | 4.415600197 | Tumor_G2 |
| 7120 | COX15    | 5.831277923 | Tumor_G2 |
| 7121 | COX5A    | 7.655597356 | Tumor_G2 |
| 7122 | COX6B1   | 8.894241545 | Tumor_G2 |
| 7123 | COX6C    | 6.851452623 | Tumor_G2 |
| 7124 | COX7A2   | 7.266788939 | Tumor_G2 |
| 7125 | COX7B    | 6.939442554 | Tumor_G2 |
| 7126 | COX8A    | 9.97920003  | Tumor_G2 |
| 7127 | SCO1     | 4.094844934 | Tumor_G2 |
| 7128 | SURF1    | 6.535843902 | Tumor_G2 |
| 7129 | ATP6V1E1 | 7.497878038 | Tumor_G2 |
| 7130 | DLAT     | 6.018934424 | Tumor_G2 |
| 7131 | PDC      | 0.106933777 | Tumor_G2 |
| 7132 | SUCLG2   | 7.163320773 | Tumor_G2 |
| 7133 | SLC25A5  | 9.202617692 | Tumor_G2 |
| 7134 | UCP2     | 6.41213897  | Tumor_G2 |
| 7135 | SOD2     | 5.091491955 | Tumor_G2 |
| 7136 | NOX4     | 1.557497162 | Tumor_G2 |
| 7137 | DUOX1    | 7.086350798 | Tumor_G2 |
| 7138 | DUOXA1   | 6.245835471 | Tumor_G2 |
| 7139 | DUOX2    | 8.195896932 | Tumor_G2 |
| 7140 | DUOXA2   | 5.81508561  | Tumor_G2 |
| 7141 | NDUFA1   | 8.279365878 | Tumor_G2 |
| 7142 | NDUFA2   | 6.845752697 | Tumor_G2 |
| 7143 | NDUFA8   | 7.228418633 | Tumor_G2 |
| 7144 | NDUFB1   | 5.880177333 | Tumor_G2 |
| 7145 | NDUFB10  | 7.731399211 | Tumor_G2 |
| 7146 | NDUFB2   | 6.874920605 | Tumor_G2 |
| 7147 | NDUFB3   | 6.567341142 | Tumor_G2 |
| 7148 | NDUFB7   | 8.932695862 | Tumor_G2 |
| 7149 | CYC1     | 7.013736617 | Tumor_G2 |
| 7150 | ETFB     | 5.466714766 | Tumor_G2 |
| 7151 | UQCR10   | 8.100089931 | Tumor_G2 |
| 7152 | UQCRQ    | 7.599797537 | Tumor_G2 |
| 7153 | UQCC3    | 4.700616908 | Tumor_G2 |
| 7154 | COX15    | 5.300627696 | Tumor_G2 |
| 7155 | COX5A    | 7.239444973 | Tumor_G2 |
| 7156 | COX6B1   | 8.814604292 | Tumor_G2 |
| 7157 | COX6C    | 6.900978683 | Tumor_G2 |
| 7158 | COX7A2   | 7.01541809  | Tumor_G2 |

|      |          |             |          |
|------|----------|-------------|----------|
| 7159 | COX7B    | 6.343457355 | Tumor_G2 |
| 7160 | COX8A    | 9.56931978  | Tumor_G2 |
| 7161 | SCO1     | 3.267535779 | Tumor_G2 |
| 7162 | SURF1    | 6.773402744 | Tumor_G2 |
| 7163 | ATP6V1E1 | 7.323004236 | Tumor_G2 |
| 7164 | DLAT     | 5.248909613 | Tumor_G2 |
| 7165 | PDC      | 0.104007132 | Tumor_G2 |
| 7166 | SUCLG2   | 6.5899791   | Tumor_G2 |
| 7167 | SLC25A5  | 7.536915147 | Tumor_G2 |
| 7168 | UCP2     | 9.441178729 | Tumor_G2 |
| 7169 | SOD2     | 4.784347488 | Tumor_G2 |
| 7170 | NOX4     | 2.476318723 | Tumor_G2 |
| 7171 | DUOX1    | 6.773063228 | Tumor_G2 |
| 7172 | DUOXA1   | 7.078440318 | Tumor_G2 |
| 7173 | DUOX2    | 7.820229502 | Tumor_G2 |
| 7174 | DUOXA2   | 5.152479785 | Tumor_G2 |
| 7175 | NDUFA1   | 8.079054241 | Tumor_G2 |
| 7176 | NDUFA2   | 6.694497666 | Tumor_G2 |
| 7177 | NDUFA8   | 7.2707736   | Tumor_G2 |
| 7178 | NDUFB1   | 5.918534071 | Tumor_G2 |
| 7179 | NDUFB10  | 7.56034117  | Tumor_G2 |
| 7180 | NDUFB2   | 6.598738089 | Tumor_G2 |
| 7181 | NDUFB3   | 6.486697201 | Tumor_G2 |
| 7182 | NDUFB7   | 8.620372666 | Tumor_G2 |
| 7183 | CYC1     | 6.842894717 | Tumor_G2 |
| 7184 | ETFB     | 5.213615438 | Tumor_G2 |
| 7185 | UQCR10   | 7.788316543 | Tumor_G2 |
| 7186 | UQCRQ    | 7.275971806 | Tumor_G2 |
| 7187 | UQCC3    | 4.668575803 | Tumor_G2 |
| 7188 | COX15    | 5.340047952 | Tumor_G2 |
| 7189 | COX5A    | 7.082752317 | Tumor_G2 |
| 7190 | COX6B1   | 8.722035931 | Tumor_G2 |
| 7191 | COX6C    | 6.652601737 | Tumor_G2 |
| 7192 | COX7A2   | 6.913618953 | Tumor_G2 |
| 7193 | COX7B    | 6.087422068 | Tumor_G2 |
| 7194 | COX8A    | 9.538721355 | Tumor_G2 |
| 7195 | SCO1     | 3.744970384 | Tumor_G2 |
| 7196 | SURF1    | 6.597645023 | Tumor_G2 |
| 7197 | ATP6V1E1 | 6.927986738 | Tumor_G2 |
| 7198 | DLAT     | 5.413247231 | Tumor_G2 |

|      |          |             |          |
|------|----------|-------------|----------|
| 7199 | PDC      | 0.074731958 | Tumor_G2 |
| 7200 | SUCLG2   | 6.584766861 | Tumor_G2 |
| 7201 | SLC25A5  | 7.809859439 | Tumor_G2 |
| 7202 | UCP2     | 8.336507092 | Tumor_G2 |
| 7203 | SOD2     | 5.111499919 | Tumor_G2 |
| 7204 | NOX4     | 2.943251738 | Tumor_G2 |
| 7205 | DUOX1    | 6.521454468 | Tumor_G2 |
| 7206 | DUOXA1   | 6.729137538 | Tumor_G2 |
| 7207 | DUOX2    | 6.943945444 | Tumor_G2 |
| 7208 | DUOXA2   | 4.505465324 | Tumor_G2 |
| 7209 | NDUFA1   | 7.729183574 | Tumor_G2 |
| 7210 | NDUFA2   | 6.481480733 | Tumor_G2 |
| 7211 | NDUFA8   | 6.981796546 | Tumor_G2 |
| 7212 | NDUFB1   | 5.206323206 | Tumor_G2 |
| 7213 | NDUFB10  | 7.447375319 | Tumor_G2 |
| 7214 | NDUFB2   | 6.33696067  | Tumor_G2 |
| 7215 | NDUFB3   | 6.037367265 | Tumor_G2 |
| 7216 | NDUFB7   | 8.781362985 | Tumor_G2 |
| 7217 | CYC1     | 6.898354786 | Tumor_G2 |
| 7218 | ETFB     | 5.469957984 | Tumor_G2 |
| 7219 | UQCR10   | 7.645932526 | Tumor_G2 |
| 7220 | UQCRQ    | 6.980082186 | Tumor_G2 |
| 7221 | UQCC3    | 4.699314437 | Tumor_G2 |
| 7222 | COX15    | 5.241423571 | Tumor_G2 |
| 7223 | COX5A    | 6.791278826 | Tumor_G2 |
| 7224 | COX6B1   | 8.750671557 | Tumor_G2 |
| 7225 | COX6C    | 6.095646825 | Tumor_G2 |
| 7226 | COX7A2   | 6.478076197 | Tumor_G2 |
| 7227 | COX7B    | 5.673413016 | Tumor_G2 |
| 7228 | COX8A    | 9.207445217 | Tumor_G2 |
| 7229 | SCO1     | 3.319021805 | Tumor_G2 |
| 7230 | SURF1    | 6.678903717 | Tumor_G2 |
| 7231 | ATP6V1E1 | 6.909909749 | Tumor_G2 |
| 7232 | DLAT     | 5.216251709 | Tumor_G2 |
| 7233 | PDC      | 0           | Tumor_G2 |
| 7234 | SUCLG2   | 6.093630811 | Tumor_G2 |
| 7235 | SLC25A5  | 7.891325673 | Tumor_G2 |
| 7236 | UCP2     | 9.182487057 | Tumor_G2 |
| 7237 | SOD2     | 5.215114007 | Tumor_G2 |
| 7238 | NOX4     | 2.942244751 | Tumor_G2 |

|      |          |             |          |
|------|----------|-------------|----------|
| 7239 | DUOX1    | 7.369398158 | Tumor_G2 |
| 7240 | DUOXA1   | 7.320435097 | Tumor_G2 |
| 7241 | DUOX2    | 8.203166902 | Tumor_G2 |
| 7242 | DUOXA2   | 6.159808819 | Tumor_G2 |
| 7243 | NDUFA1   | 7.585117288 | Tumor_G2 |
| 7244 | NDUFA2   | 6.64747746  | Tumor_G2 |
| 7245 | NDUFA8   | 7.552873814 | Tumor_G2 |
| 7246 | NDUFB1   | 5.314838731 | Tumor_G2 |
| 7247 | NDUFB10  | 7.420970917 | Tumor_G2 |
| 7248 | NDUFB2   | 6.124348896 | Tumor_G2 |
| 7249 | NDUFB3   | 5.87796115  | Tumor_G2 |
| 7250 | NDUFB7   | 8.532855933 | Tumor_G2 |
| 7251 | CYC1     | 6.704272087 | Tumor_G2 |
| 7252 | ETFB     | 5.090296957 | Tumor_G2 |
| 7253 | UQCR10   | 7.669001773 | Tumor_G2 |
| 7254 | UQCRQ    | 7.171940189 | Tumor_G2 |
| 7255 | UQCC3    | 4.353849908 | Tumor_G2 |
| 7256 | COX15    | 4.717269242 | Tumor_G2 |
| 7257 | COX5A    | 7.007782039 | Tumor_G2 |
| 7258 | COX6B1   | 8.982950421 | Tumor_G2 |
| 7259 | COX6C    | 6.151835744 | Tumor_G2 |
| 7260 | COX7A2   | 6.724616944 | Tumor_G2 |
| 7261 | COX7B    | 6.015876976 | Tumor_G2 |
| 7262 | COX8A    | 9.073985834 | Tumor_G2 |
| 7263 | SCO1     | 3.222188106 | Tumor_G2 |
| 7264 | SURF1    | 6.501945334 | Tumor_G2 |
| 7265 | ATP6V1E1 | 6.969969455 | Tumor_G2 |
| 7266 | DLAT     | 5.044081271 | Tumor_G2 |
| 7267 | PDC      | 0           | Tumor_G2 |
| 7268 | SUCLG2   | 5.878590526 | Tumor_G2 |
| 7269 | SLC25A5  | 7.820007268 | Tumor_G2 |
| 7270 | UCP2     | 8.030118274 | Tumor_G2 |
| 7271 | SOD2     | 4.815521156 | Tumor_G2 |
| 7272 | NOX4     | 3.328051622 | Tumor_G2 |
| 7273 | DUOX1    | 6.576811935 | Tumor_G2 |
| 7274 | DUOXA1   | 6.891483725 | Tumor_G2 |
| 7275 | DUOX2    | 7.308950078 | Tumor_G2 |
| 7276 | DUOXA2   | 5.61683991  | Tumor_G2 |
| 7277 | NDUFA1   | 8.05324961  | Tumor_G2 |
| 7278 | NDUFA2   | 6.697501288 | Tumor_G2 |

|      |          |             |          |
|------|----------|-------------|----------|
| 7279 | NDUFA8   | 7.02499543  | Tumor_G2 |
| 7280 | NDUFB1   | 5.817037655 | Tumor_G2 |
| 7281 | NDUFB10  | 7.558261854 | Tumor_G2 |
| 7282 | NDUFB2   | 6.394092671 | Tumor_G2 |
| 7283 | NDUFB3   | 6.434940978 | Tumor_G2 |
| 7284 | NDUFB7   | 8.686529429 | Tumor_G2 |
| 7285 | CYC1     | 6.647191447 | Tumor_G2 |
| 7286 | ETFB     | 5.119236974 | Tumor_G2 |
| 7287 | UQCR10   | 7.668483697 | Tumor_G2 |
| 7288 | UQCRQ    | 7.200735942 | Tumor_G2 |
| 7289 | UQCC3    | 4.712855562 | Tumor_G2 |
| 7290 | COX15    | 5.004871285 | Tumor_G2 |
| 7291 | COX5A    | 6.929960993 | Tumor_G2 |
| 7292 | COX6B1   | 8.817400072 | Tumor_G2 |
| 7293 | COX6C    | 6.52741877  | Tumor_G2 |
| 7294 | COX7A2   | 6.775108962 | Tumor_G2 |
| 7295 | COX7B    | 6.101163083 | Tumor_G2 |
| 7296 | COX8A    | 9.474730876 | Tumor_G2 |
| 7297 | SCO1     | 3.341775194 | Tumor_G2 |
| 7298 | SURF1    | 6.840747607 | Tumor_G2 |
| 7299 | ATP6V1E1 | 6.725755466 | Tumor_G2 |
| 7300 | DLAT     | 4.913065679 | Tumor_G2 |
| 7301 | PDC      | 0           | Tumor_G2 |
| 7302 | SUCLG2   | 5.99867576  | Tumor_G2 |
| 7303 | SLC25A5  | 7.746822246 | Tumor_G2 |
| 7304 | UCP2     | 8.207803779 | Tumor_G2 |
| 7305 | SOD2     | 5.239016067 | Tumor_G2 |
| 7306 | NOX4     | 1.481093105 | Tumor_G2 |
| 7307 | DUOX1    | 6.907407258 | Tumor_G2 |
| 7308 | DUOXA1   | 6.7196991   | Tumor_G2 |
| 7309 | DUOX2    | 8.062193634 | Tumor_G2 |
| 7310 | DUOXA2   | 6.394887468 | Tumor_G2 |
| 7311 | NDUFA1   | 9.275993491 | Tumor_G2 |
| 7312 | NDUFA2   | 7.137957145 | Tumor_G2 |
| 7313 | NDUFA8   | 7.52633973  | Tumor_G2 |
| 7314 | NDUFB1   | 6.495295522 | Tumor_G2 |
| 7315 | NDUFB10  | 8.319806618 | Tumor_G2 |
| 7316 | NDUFB2   | 7.406052695 | Tumor_G2 |
| 7317 | NDUFB3   | 6.471524157 | Tumor_G2 |
| 7318 | NDUFB7   | 8.912091561 | Tumor_G2 |

|      |          |             |          |
|------|----------|-------------|----------|
| 7319 | CYC1     | 7.926505284 | Tumor_G2 |
| 7320 | ETFB     | 5.43084105  | Tumor_G2 |
| 7321 | UQCR10   | 7.749956779 | Tumor_G2 |
| 7322 | UQCRQ    | 8.016998923 | Tumor_G2 |
| 7323 | UQCC3    | 4.441702621 | Tumor_G2 |
| 7324 | COX15    | 5.453586428 | Tumor_G2 |
| 7325 | COX5A    | 8.442257111 | Tumor_G2 |
| 7326 | COX6B1   | 9.204539146 | Tumor_G2 |
| 7327 | COX6C    | 6.890032685 | Tumor_G2 |
| 7328 | COX7A2   | 8.287627774 | Tumor_G2 |
| 7329 | COX7B    | 7.864334597 | Tumor_G2 |
| 7330 | COX8A    | 10.60906879 | Tumor_G2 |
| 7331 | SCO1     | 3.99669968  | Tumor_G2 |
| 7332 | SURF1    | 5.268457044 | Tumor_G2 |
| 7333 | ATP6V1E1 | 6.4054411   | Tumor_G2 |
| 7334 | DLAT     | 5.836387495 | Tumor_G2 |
| 7335 | PDC      | 0           | Tumor_G2 |
| 7336 | SUCLG2   | 6.767752368 | Tumor_G2 |
| 7337 | SLC25A5  | 10.15379703 | Tumor_G2 |
| 7338 | UCP2     | 3.809718725 | Tumor_G2 |
| 7339 | SOD2     | 5.412421971 | Tumor_G2 |
| 7340 | NOX4     | 1.208010902 | Tumor_G2 |
| 7341 | DUOX1    | 3.813300537 | Tumor_G2 |
| 7342 | DUOXA1   | 3.966955542 | Tumor_G2 |
| 7343 | DUOX2    | 3.869553506 | Tumor_G2 |
| 7344 | DUOXA2   | 2.471423095 | Tumor_G2 |
| 7345 | NDUFA1   | 8.706020242 | Tumor_G2 |
| 7346 | NDUFA2   | 7.167483393 | Tumor_G2 |
| 7347 | NDUFA8   | 7.348326254 | Tumor_G2 |
| 7348 | NDUFB1   | 6.027296545 | Tumor_G2 |
| 7349 | NDUFB10  | 7.900587656 | Tumor_G2 |
| 7350 | NDUFB2   | 7.75045982  | Tumor_G2 |
| 7351 | NDUFB3   | 6.942985878 | Tumor_G2 |
| 7352 | NDUFB7   | 8.933825404 | Tumor_G2 |
| 7353 | CYC1     | 7.746161866 | Tumor_G2 |
| 7354 | ETFB     | 5.461276329 | Tumor_G2 |
| 7355 | UQCR10   | 8.166323664 | Tumor_G2 |
| 7356 | UQCRQ    | 7.623807068 | Tumor_G2 |
| 7357 | UQCC3    | 5.130228037 | Tumor_G2 |
| 7358 | COX15    | 5.804855126 | Tumor_G2 |



|      |          |             |          |
|------|----------|-------------|----------|
| 7359 | COX5A    | 7.675834501 | Tumor_G2 |
| 7360 | COX6B1   | 9.0267908   | Tumor_G2 |
| 7361 | COX6C    | 6.975258965 | Tumor_G2 |
| 7362 | COX7A2   | 7.426673376 | Tumor_G2 |
| 7363 | COX7B    | 6.926476006 | Tumor_G2 |
| 7364 | COX8A    | 10.05774892 | Tumor_G2 |
| 7365 | SCO1     | 4.401453477 | Tumor_G2 |
| 7366 | SURF1    | 7.174258767 | Tumor_G2 |
| 7367 | ATP6V1E1 | 7.252193141 | Tumor_G2 |
| 7368 | DLAT     | 5.615461155 | Tumor_G2 |
| 7369 | PDC      | 0.218426846 | Tumor_G2 |
| 7370 | SUCLG2   | 7.18191081  | Tumor_G2 |
| 7371 | SLC25A5  | 9.458761843 | Tumor_G2 |
| 7372 | UCP2     | 6.951401165 | Tumor_G2 |
| 7373 | SOD2     | 5.76567633  | Tumor_G2 |
| 7374 | NOX4     | 1.54198866  | Tumor_G2 |
| 7375 | DUOX1    | 5.975182011 | Tumor_G2 |
| 7376 | DUOXA1   | 6.734884266 | Tumor_G2 |
| 7377 | DUOX2    | 5.733327369 | Tumor_G2 |
| 7378 | DUOXA2   | 5.144283988 | Tumor_G2 |
| 7379 | NDUFA1   | 7.971578327 | Tumor_G2 |
| 7380 | NDUFA2   | 6.290718398 | Tumor_G2 |
| 7381 | NDUFA8   | 6.925322848 | Tumor_G2 |
| 7382 | NDUFB1   | 5.438398653 | Tumor_G2 |
| 7383 | NDUFB10  | 7.436964189 | Tumor_G2 |
| 7384 | NDUFB2   | 5.934575057 | Tumor_G2 |
| 7385 | NDUFB3   | 6.183947988 | Tumor_G2 |
| 7386 | NDUFB7   | 8.53885222  | Tumor_G2 |
| 7387 | CYC1     | 6.590204812 | Tumor_G2 |
| 7388 | ETFB     | 4.949080248 | Tumor_G2 |
| 7389 | UQCR10   | 7.469002052 | Tumor_G2 |
| 7390 | UQCRQ    | 7.057473962 | Tumor_G2 |
| 7391 | UQCC3    | 4.435929448 | Tumor_G2 |
| 7392 | COX15    | 4.918242733 | Tumor_G2 |
| 7393 | COX5A    | 6.926631167 | Tumor_G2 |
| 7394 | COX6B1   | 8.525976424 | Tumor_G2 |
| 7395 | COX6C    | 6.245141698 | Tumor_G2 |
| 7396 | COX7A2   | 6.593200556 | Tumor_G2 |
| 7397 | COX7B    | 5.97479097  | Tumor_G2 |
| 7398 | COX8A    | 9.179975229 | Tumor_G2 |

|      |          |             |          |
|------|----------|-------------|----------|
| 7399 | SCO1     | 3.33565817  | Tumor_G2 |
| 7400 | SURF1    | 6.178883927 | Tumor_G2 |
| 7401 | ATP6V1E1 | 6.706955625 | Tumor_G2 |
| 7402 | DLAT     | 4.83814858  | Tumor_G2 |
| 7403 | PDC      | 0.096318622 | Tumor_G2 |
| 7404 | SUCLG2   | 5.758882304 | Tumor_G2 |
| 7405 | SLC25A5  | 7.765357496 | Tumor_G2 |
| 7406 | UCP2     | 8.769759542 | Tumor_G2 |
| 7407 | SOD2     | 5.048003108 | Tumor_G2 |
| 7408 | NOX4     | 3.006598391 | Tumor_G2 |
| 7409 | DUOX1    | 6.547461915 | Tumor_G2 |
| 7410 | DUOXA1   | 6.973507611 | Tumor_G2 |
| 7411 | DUOX2    | 7.439805332 | Tumor_G2 |
| 7412 | DUOXA2   | 5.266792834 | Tumor_G2 |
| 7413 | NDUFA1   | 7.905304241 | Tumor_G2 |
| 7414 | NDUFA2   | 6.283569549 | Tumor_G2 |
| 7415 | NDUFA8   | 7.159007912 | Tumor_G2 |
| 7416 | NDUFB1   | 5.508190662 | Tumor_G2 |
| 7417 | NDUFB10  | 7.236166027 | Tumor_G2 |
| 7418 | NDUFB2   | 6.116454985 | Tumor_G2 |
| 7419 | NDUFB3   | 6.300599333 | Tumor_G2 |
| 7420 | NDUFB7   | 8.226206342 | Tumor_G2 |
| 7421 | CYC1     | 6.506977451 | Tumor_G2 |
| 7422 | ETFB     | 5.005535489 | Tumor_G2 |
| 7423 | UQCR10   | 7.395712885 | Tumor_G2 |
| 7424 | UQCRQ    | 6.925681011 | Tumor_G2 |
| 7425 | UQCC3    | 3.914778526 | Tumor_G2 |
| 7426 | COX15    | 5.068450525 | Tumor_G2 |
| 7427 | COX5A    | 6.765144219 | Tumor_G2 |
| 7428 | COX6B1   | 8.677584296 | Tumor_G2 |
| 7429 | COX6C    | 6.21663224  | Tumor_G2 |
| 7430 | COX7A2   | 6.716685353 | Tumor_G2 |
| 7431 | COX7B    | 6.020777455 | Tumor_G2 |
| 7432 | COX8A    | 8.66616496  | Tumor_G2 |
| 7433 | SCO1     | 3.529861637 | Tumor_G2 |
| 7434 | SURF1    | 6.308269421 | Tumor_G2 |
| 7435 | ATP6V1E1 | 6.922088472 | Tumor_G2 |
| 7436 | DLAT     | 5.107943118 | Tumor_G2 |
| 7437 | PDC      | 0.086018185 | Tumor_G2 |
| 7438 | SUCLG2   | 6.120868783 | Tumor_G2 |

|      |          |             |          |
|------|----------|-------------|----------|
| 7439 | SLC25A5  | 7.724412285 | Tumor_G2 |
| 7440 | UCP2     | 8.750171965 | Tumor_G2 |
| 7441 | SOD2     | 4.886705523 | Tumor_G2 |
| 7442 | NOX4     | 2.854902061 | Tumor_G2 |
| 7443 | DUOX1    | 6.757534534 | Tumor_G2 |
| 7444 | DUOXA1   | 7.113974983 | Tumor_G2 |
| 7445 | DUOX2    | 8.030143889 | Tumor_G2 |
| 7446 | DUOXA2   | 5.126515601 | Tumor_G2 |
| 7447 | NDUFA1   | 8.366357266 | Tumor_G2 |
| 7448 | NDUFA2   | 6.898141821 | Tumor_G2 |
| 7449 | NDUFA8   | 7.508564165 | Tumor_G2 |
| 7450 | NDUFB1   | 5.877225536 | Tumor_G2 |
| 7451 | NDUFB10  | 7.748627549 | Tumor_G2 |
| 7452 | NDUFB2   | 6.643472876 | Tumor_G2 |
| 7453 | NDUFB3   | 6.59881069  | Tumor_G2 |
| 7454 | NDUFB7   | 8.928108172 | Tumor_G2 |
| 7455 | CYC1     | 7.008798844 | Tumor_G2 |
| 7456 | ETFB     | 5.602763822 | Tumor_G2 |
| 7457 | UQCR10   | 7.555563534 | Tumor_G2 |
| 7458 | UQCRQ    | 7.266025269 | Tumor_G2 |
| 7459 | UQCC3    | 4.85274497  | Tumor_G2 |
| 7460 | COX15    | 5.148028304 | Tumor_G2 |
| 7461 | COX5A    | 7.059130076 | Tumor_G2 |
| 7462 | COX6B1   | 8.861197139 | Tumor_G2 |
| 7463 | COX6C    | 6.638292539 | Tumor_G2 |
| 7464 | COX7A2   | 6.828285769 | Tumor_G2 |
| 7465 | COX7B    | 6.153421258 | Tumor_G2 |
| 7466 | COX8A    | 9.637410622 | Tumor_G2 |
| 7467 | SCO1     | 3.525377535 | Tumor_G2 |
| 7468 | SURF1    | 6.639764919 | Tumor_G2 |
| 7469 | ATP6V1E1 | 6.658584793 | Tumor_G2 |
| 7470 | DLAT     | 5.093335362 | Tumor_G2 |
| 7471 | PDC      | 0.091670136 | Tumor_G2 |
| 7472 | SUCLG2   | 6.214492854 | Tumor_G2 |
| 7473 | SLC25A5  | 7.757879189 | Tumor_G2 |
| 7474 | UCP2     | 8.988378565 | Tumor_G2 |
| 7475 | SOD2     | 4.723581607 | Tumor_G2 |
| 7476 | NOX4     | 1.983320601 | Tumor_G2 |
| 7477 | DUOX1    | 7.318086486 | Tumor_G2 |
| 7478 | DUOXA1   | 7.256896832 | Tumor_G2 |

|      |          |             |          |
|------|----------|-------------|----------|
| 7479 | DUOX2    | 8.782773395 | Tumor_G2 |
| 7480 | DUOXA2   | 6.366566853 | Tumor_G2 |
| 7481 | NDUFA1   | 8.045569816 | Tumor_G2 |
| 7482 | NDUFA2   | 6.829798072 | Tumor_G2 |
| 7483 | NDUFA8   | 7.807660419 | Tumor_G2 |
| 7484 | NDUFB1   | 5.663109724 | Tumor_G2 |
| 7485 | NDUFB10  | 7.553016107 | Tumor_G2 |
| 7486 | NDUFB2   | 7.085494145 | Tumor_G2 |
| 7487 | NDUFB3   | 6.483018182 | Tumor_G2 |
| 7488 | NDUFB7   | 8.757272547 | Tumor_G2 |
| 7489 | CYC1     | 7.805040377 | Tumor_G2 |
| 7490 | ETFB     | 5.326721823 | Tumor_G2 |
| 7491 | UQCR10   | 7.203644071 | Tumor_G2 |
| 7492 | UQCRQ    | 7.534449905 | Tumor_G2 |
| 7493 | UQCC3    | 4.228549723 | Tumor_G2 |
| 7494 | COX15    | 5.327409881 | Tumor_G2 |
| 7495 | COX5A    | 7.520128836 | Tumor_G2 |
| 7496 | COX6B1   | 8.897810596 | Tumor_G2 |
| 7497 | COX6C    | 6.943957143 | Tumor_G2 |
| 7498 | COX7A2   | 7.139286649 | Tumor_G2 |
| 7499 | COX7B    | 6.733989095 | Tumor_G2 |
| 7500 | COX8A    | 10.11078669 | Tumor_G2 |
| 7501 | SCO1     | 3.565507367 | Tumor_G2 |
| 7502 | SURF1    | 6.340527191 | Tumor_G2 |
| 7503 | ATP6V1E1 | 6.597808581 | Tumor_G2 |
| 7504 | DLAT     | 5.418641953 | Tumor_G2 |
| 7505 | PDC      | 0.09608204  | Tumor_G2 |
| 7506 | SUCLG2   | 6.936670832 | Tumor_G2 |
| 7507 | SLC25A5  | 9.036717432 | Tumor_G2 |
| 7508 | UCP2     | 7.214238906 | Tumor_G2 |
| 7509 | SOD2     | 4.662323836 | Tumor_G2 |
| 7510 | NOX4     | 1.015108549 | Tumor_G2 |
| 7511 | DUOX1    | 7.23988653  | Tumor_G2 |
| 7512 | DUOXA1   | 6.415434468 | Tumor_G2 |
| 7513 | DUOX2    | 10.02132027 | Tumor_G2 |
| 7514 | DUOXA2   | 6.976821824 | Tumor_G2 |
| 7515 | NDUFA1   | 8.355419757 | Tumor_G2 |
| 7516 | NDUFA2   | 6.772265507 | Tumor_G2 |
| 7517 | NDUFA8   | 7.241111583 | Tumor_G2 |
| 7518 | NDUFB1   | 5.802865596 | Tumor_G2 |

|      |          |             |          |
|------|----------|-------------|----------|
| 7519 | NDUFB10  | 7.531544632 | Tumor_G2 |
| 7520 | NDUFB2   | 6.433444051 | Tumor_G2 |
| 7521 | NDUFB3   | 6.438232123 | Tumor_G2 |
| 7522 | NDUFB7   | 8.669404153 | Tumor_G2 |
| 7523 | CYC1     | 6.786383704 | Tumor_G2 |
| 7524 | ETFB     | 5.432306615 | Tumor_G2 |
| 7525 | UQCR10   | 7.54388908  | Tumor_G2 |
| 7526 | UQCRQ    | 7.213233379 | Tumor_G2 |
| 7527 | UQCC3    | 4.331717211 | Tumor_G2 |
| 7528 | COX15    | 5.28628741  | Tumor_G2 |
| 7529 | COX5A    | 6.810073631 | Tumor_G2 |
| 7530 | COX6B1   | 8.875413291 | Tumor_G2 |
| 7531 | COX6C    | 6.477939697 | Tumor_G2 |
| 7532 | COX7A2   | 6.907190855 | Tumor_G2 |
| 7533 | COX7B    | 6.041084901 | Tumor_G2 |
| 7534 | COX8A    | 9.190364844 | Tumor_G2 |
| 7535 | SCO1     | 3.417772734 | Tumor_G2 |
| 7536 | SURF1    | 6.440029739 | Tumor_G2 |
| 7537 | ATP6V1E1 | 6.916345765 | Tumor_G2 |
| 7538 | DLAT     | 5.064752068 | Tumor_G2 |
| 7539 | PDC      | 0.186269829 | Tumor_G2 |
| 7540 | SUCLG2   | 6.044317769 | Tumor_G2 |
| 7541 | SLC25A5  | 7.702505514 | Tumor_G2 |
| 7542 | UCP2     | 9.168765598 | Tumor_G2 |
| 7543 | SOD2     | 4.99228301  | Tumor_G2 |
| 7544 | NOX4     | 2.202377631 | Tumor_G2 |
| 7545 | DUOX1    | 7.135106022 | Tumor_G2 |
| 7546 | DUOXA1   | 7.283997688 | Tumor_G2 |
| 7547 | DUOX2    | 8.03204909  | Tumor_G2 |
| 7548 | DUOXA2   | 5.584649692 | Tumor_G2 |
| 7549 | NDUFA1   | 7.863352284 | Tumor_G2 |
| 7550 | NDUFA2   | 6.469528087 | Tumor_G2 |
| 7551 | NDUFA8   | 6.807090618 | Tumor_G2 |
| 7552 | NDUFB1   | 5.254281552 | Tumor_G2 |
| 7553 | NDUFB10  | 7.336981776 | Tumor_G2 |
| 7554 | NDUFB2   | 6.552386153 | Tumor_G2 |
| 7555 | NDUFB3   | 6.194731887 | Tumor_G2 |
| 7556 | NDUFB7   | 8.610934752 | Tumor_G2 |
| 7557 | CYC1     | 6.6353476   | Tumor_G2 |
| 7558 | ETFB     | 4.996311531 | Tumor_G2 |

|      |          |             |          |
|------|----------|-------------|----------|
| 7559 | UQCR10   | 7.463283553 | Tumor_G2 |
| 7560 | UQCRQ    | 6.989729033 | Tumor_G2 |
| 7561 | UQCC3    | 4.378669293 | Tumor_G2 |
| 7562 | COX15    | 4.753928549 | Tumor_G2 |
| 7563 | COX5A    | 6.831197576 | Tumor_G2 |
| 7564 | COX6B1   | 8.499033392 | Tumor_G2 |
| 7565 | COX6C    | 6.151927567 | Tumor_G2 |
| 7566 | COX7A2   | 6.659586131 | Tumor_G2 |
| 7567 | COX7B    | 5.766676703 | Tumor_G2 |
| 7568 | COX8A    | 9.306346665 | Tumor_G2 |
| 7569 | SCO1     | 3.264351979 | Tumor_G2 |
| 7570 | SURF1    | 6.130081572 | Tumor_G2 |
| 7571 | ATP6V1E1 | 7.229374256 | Tumor_G2 |
| 7572 | DLAT     | 5.047724805 | Tumor_G2 |
| 7573 | PDC      | 0.044659092 | Tumor_G2 |
| 7574 | SUCLG2   | 6.084024181 | Tumor_G2 |
| 7575 | SLC25A5  | 7.861307936 | Tumor_G2 |
| 7576 | UCP2     | 9.290102479 | Tumor_G2 |
| 7577 | SOD2     | 4.958591523 | Tumor_G2 |
| 7578 | NOX4     | 2.337331146 | Tumor_G2 |
| 7579 | DUOX1    | 7.013992578 | Tumor_G2 |
| 7580 | DUOXA1   | 7.153302472 | Tumor_G2 |
| 7581 | DUOX2    | 7.370971066 | Tumor_G2 |
| 7582 | DUOXA2   | 5.059873453 | Tumor_G2 |
| 7583 | NDUFA1   | 8.230057663 | Tumor_G2 |
| 7584 | NDUFA2   | 7.143147441 | Tumor_G2 |
| 7585 | NDUFA8   | 7.373918566 | Tumor_G2 |
| 7586 | NDUFB1   | 5.773304789 | Tumor_G2 |
| 7587 | NDUFB10  | 7.794802448 | Tumor_G2 |
| 7588 | NDUFB2   | 6.765504453 | Tumor_G2 |
| 7589 | NDUFB3   | 6.544838535 | Tumor_G2 |
| 7590 | NDUFB7   | 9.033147073 | Tumor_G2 |
| 7591 | CYC1     | 7.182443865 | Tumor_G2 |
| 7592 | ETFB     | 5.943226574 | Tumor_G2 |
| 7593 | UQCR10   | 7.245532491 | Tumor_G2 |
| 7594 | UQCRQ    | 7.346251882 | Tumor_G2 |
| 7595 | UQCC3    | 4.589159078 | Tumor_G2 |
| 7596 | COX15    | 5.048015393 | Tumor_G2 |
| 7597 | COX5A    | 6.881645008 | Tumor_G2 |
| 7598 | COX6B1   | 9.068599223 | Tumor_G2 |

|      |          |             |          |
|------|----------|-------------|----------|
| 7599 | COX6C    | 6.632287781 | Tumor_G2 |
| 7600 | COX7A2   | 7.209620132 | Tumor_G2 |
| 7601 | COX7B    | 6.234154852 | Tumor_G2 |
| 7602 | COX8A    | 9.460083167 | Tumor_G2 |
| 7603 | SCO1     | 3.405112658 | Tumor_G2 |
| 7604 | SURF1    | 6.977995574 | Tumor_G2 |
| 7605 | ATP6V1E1 | 6.469965443 | Tumor_G2 |
| 7606 | DLAT     | 5.005104962 | Tumor_G2 |
| 7607 | PDC      | 0.061607458 | Tumor_G2 |
| 7608 | SUCLG2   | 6.160601201 | Tumor_G2 |
| 7609 | SLC25A5  | 7.94002484  | Tumor_G2 |
| 7610 | UCP2     | 9.424845246 | Tumor_G2 |
| 7611 | SOD2     | 4.58926744  | Tumor_G2 |
| 7612 | NOX4     | 1.653787241 | Tumor_G2 |
| 7613 | DUOX1    | 7.099945633 | Tumor_G2 |
| 7614 | DUOXA1   | 7.14876036  | Tumor_G2 |
| 7615 | DUOX2    | 8.756688554 | Tumor_G2 |
| 7616 | DUOXA2   | 6.167131923 | Tumor_G2 |
| 7617 | NDUFA1   | 8.006158466 | Tumor_G2 |
| 7618 | NDUFA2   | 6.778560386 | Tumor_G2 |
| 7619 | NDUFA8   | 7.094779471 | Tumor_G2 |
| 7620 | NDUFB1   | 5.424276159 | Tumor_G2 |
| 7621 | NDUFB10  | 7.683383785 | Tumor_G2 |
| 7622 | NDUFB2   | 6.627129109 | Tumor_G2 |
| 7623 | NDUFB3   | 6.209896496 | Tumor_G2 |
| 7624 | NDUFB7   | 8.824592698 | Tumor_G2 |
| 7625 | CYC1     | 7.146343459 | Tumor_G2 |
| 7626 | ETFB     | 5.917532496 | Tumor_G2 |
| 7627 | UQCR10   | 7.139498236 | Tumor_G2 |
| 7628 | UQCRQ    | 7.322773736 | Tumor_G2 |
| 7629 | UQCC3    | 4.781519599 | Tumor_G2 |
| 7630 | COX15    | 4.719527352 | Tumor_G2 |
| 7631 | COX5A    | 6.899690105 | Tumor_G2 |
| 7632 | COX6B1   | 8.900637362 | Tumor_G2 |
| 7633 | COX6C    | 6.279012138 | Tumor_G2 |
| 7634 | COX7A2   | 7.043033943 | Tumor_G2 |
| 7635 | COX7B    | 6.126015176 | Tumor_G2 |
| 7636 | COX8A    | 9.664367087 | Tumor_G2 |
| 7637 | SCO1     | 3.24616852  | Tumor_G2 |
| 7638 | SURF1    | 6.36632291  | Tumor_G2 |

|      |          |             |          |
|------|----------|-------------|----------|
| 7639 | ATP6V1E1 | 6.422267732 | Tumor_G2 |
| 7640 | DLAT     | 4.723019078 | Tumor_G2 |
| 7641 | PDC      | 0.055420197 | Tumor_G2 |
| 7642 | SUCLG2   | 5.835925486 | Tumor_G2 |
| 7643 | SLC25A5  | 7.66078166  | Tumor_G2 |
| 7644 | UCP2     | 8.119078165 | Tumor_G2 |
| 7645 | SOD2     | 4.011226738 | Tumor_G2 |
| 7646 | NOX4     | 1.406850279 | Tumor_G2 |
| 7647 | DUOX1    | 7.556601549 | Tumor_G2 |
| 7648 | DUOXA1   | 7.322596865 | Tumor_G2 |
| 7649 | DUOX2    | 7.98711028  | Tumor_G2 |
| 7650 | DUOXA2   | 6.274986863 | Tumor_G2 |
| 7651 | NDUFA1   | 8.094629185 | Tumor_G2 |
| 7652 | NDUFA2   | 7.064737788 | Tumor_G2 |
| 7653 | NDUFA8   | 7.402471088 | Tumor_G2 |
| 7654 | NDUFB1   | 5.946945481 | Tumor_G2 |
| 7655 | NDUFB10  | 7.390266809 | Tumor_G2 |
| 7656 | NDUFB2   | 6.948196117 | Tumor_G2 |
| 7657 | NDUFB3   | 6.503897087 | Tumor_G2 |
| 7658 | NDUFB7   | 8.929193701 | Tumor_G2 |
| 7659 | CYC1     | 6.953482334 | Tumor_G2 |
| 7660 | ETFB     | 5.449898655 | Tumor_G2 |
| 7661 | UQCR10   | 7.211437009 | Tumor_G2 |
| 7662 | UQCRQ    | 7.452466616 | Tumor_G2 |
| 7663 | UQCC3    | 4.616905312 | Tumor_G2 |
| 7664 | COX15    | 5.179322398 | Tumor_G2 |
| 7665 | COX5A    | 7.041798262 | Tumor_G2 |
| 7666 | COX6B1   | 8.933690755 | Tumor_G2 |
| 7667 | COX6C    | 6.843339832 | Tumor_G2 |
| 7668 | COX7A2   | 6.983438277 | Tumor_G2 |
| 7669 | COX7B    | 6.353926907 | Tumor_G2 |
| 7670 | COX8A    | 9.809213733 | Tumor_G2 |
| 7671 | SCO1     | 3.518935245 | Tumor_G2 |
| 7672 | SURF1    | 7.15176188  | Tumor_G2 |
| 7673 | ATP6V1E1 | 7.21849067  | Tumor_G2 |
| 7674 | DLAT     | 4.985260258 | Tumor_G2 |
| 7675 | PDC      | 0.274916236 | Tumor_G2 |
| 7676 | SUCLG2   | 6.473100655 | Tumor_G2 |
| 7677 | SLC25A5  | 8.156960804 | Tumor_G2 |
| 7678 | UCP2     | 8.292265969 | Tumor_G2 |



|      |          |             |          |
|------|----------|-------------|----------|
| 7679 | SOD2     | 4.37015471  | Tumor_G2 |
| 7680 | NOX4     | 1.92382634  | Tumor_G2 |
| 7681 | DUOX1    | 8.563261973 | Tumor_G2 |
| 7682 | DUOXA1   | 8.224556249 | Tumor_G2 |
| 7683 | DUOX2    | 10.38903981 | Tumor_G2 |
| 7684 | DUOXA2   | 7.957347914 | Tumor_G2 |
| 7685 | NDUFA1   | 8.388966315 | Tumor_G2 |
| 7686 | NDUFA2   | 6.974098303 | Tumor_G2 |
| 7687 | NDUFA8   | 7.22326763  | Tumor_G2 |
| 7688 | NDUFB1   | 6.024957646 | Tumor_G2 |
| 7689 | NDUFB10  | 7.730585176 | Tumor_G2 |
| 7690 | NDUFB2   | 6.797064236 | Tumor_G2 |
| 7691 | NDUFB3   | 6.562561048 | Tumor_G2 |
| 7692 | NDUFB7   | 9.163336946 | Tumor_G2 |
| 7693 | CYC1     | 7.075409375 | Tumor_G2 |
| 7694 | ETFB     | 5.732986074 | Tumor_G2 |
| 7695 | UQCR10   | 7.967775673 | Tumor_G2 |
| 7696 | UQCRQ    | 7.34442956  | Tumor_G2 |
| 7697 | UQCC3    | 5.163567959 | Tumor_G2 |
| 7698 | COX15    | 5.180775989 | Tumor_G2 |
| 7699 | COX5A    | 7.005527959 | Tumor_G2 |
| 7700 | COX6B1   | 8.839946096 | Tumor_G2 |
| 7701 | COX6C    | 6.615490755 | Tumor_G2 |
| 7702 | COX7A2   | 6.8233743   | Tumor_G2 |
| 7703 | COX7B    | 6.076541467 | Tumor_G2 |
| 7704 | COX8A    | 9.960700201 | Tumor_G2 |
| 7705 | SCO1     | 3.357291821 | Tumor_G2 |
| 7706 | SURF1    | 6.601795106 | Tumor_G2 |
| 7707 | ATP6V1E1 | 6.88032349  | Tumor_G2 |
| 7708 | DLAT     | 4.867141669 | Tumor_G2 |
| 7709 | PDC      | 0.170090374 | Tumor_G2 |
| 7710 | SUCLG2   | 6.221416014 | Tumor_G2 |
| 7711 | SLC25A5  | 7.593919978 | Tumor_G2 |
| 7712 | UCP2     | 9.248726051 | Tumor_G2 |
| 7713 | SOD2     | 4.371624116 | Tumor_G2 |
| 7714 | NOX4     | 1.906307859 | Tumor_G2 |
| 7715 | DUOX1    | 6.937342164 | Tumor_G2 |
| 7716 | DUOXA1   | 6.850313141 | Tumor_G2 |
| 7717 | DUOX2    | 7.687905845 | Tumor_G2 |
| 7718 | DUOXA2   | 6.811276323 | Tumor_G2 |

|      |          |             |          |
|------|----------|-------------|----------|
| 7719 | NDUFA1   | 8.212139327 | Tumor_G2 |
| 7720 | NDUFA2   | 6.882389513 | Tumor_G2 |
| 7721 | NDUFA8   | 7.265976718 | Tumor_G2 |
| 7722 | NDUFB1   | 5.870526993 | Tumor_G2 |
| 7723 | NDUFB10  | 7.510132822 | Tumor_G2 |
| 7724 | NDUFB2   | 7.111763814 | Tumor_G2 |
| 7725 | NDUFB3   | 6.668122863 | Tumor_G2 |
| 7726 | NDUFB7   | 8.941617161 | Tumor_G2 |
| 7727 | CYC1     | 7.081080775 | Tumor_G2 |
| 7728 | ETFB     | 5.463291873 | Tumor_G2 |
| 7729 | UQCR10   | 7.929848901 | Tumor_G2 |
| 7730 | UQCRQ    | 7.382223621 | Tumor_G2 |
| 7731 | UQCC3    | 4.239740564 | Tumor_G2 |
| 7732 | COX15    | 5.233864857 | Tumor_G2 |
| 7733 | COX5A    | 7.017384055 | Tumor_G2 |
| 7734 | COX6B1   | 8.963228921 | Tumor_G2 |
| 7735 | COX6C    | 6.711105449 | Tumor_G2 |
| 7736 | COX7A2   | 6.927694378 | Tumor_G2 |
| 7737 | COX7B    | 6.249643818 | Tumor_G2 |
| 7738 | COX8A    | 9.402562777 | Tumor_G2 |
| 7739 | SCO1     | 3.856109657 | Tumor_G2 |
| 7740 | SURF1    | 6.809774108 | Tumor_G2 |
| 7741 | ATP6V1E1 | 6.776520508 | Tumor_G2 |
| 7742 | DLAT     | 5.047530686 | Tumor_G2 |
| 7743 | PDC      | 0.225943747 | Tumor_G2 |
| 7744 | SUCLG2   | 6.595055994 | Tumor_G2 |
| 7745 | SLC25A5  | 8.222527934 | Tumor_G2 |
| 7746 | UCP2     | 8.760657038 | Tumor_G2 |
| 7747 | SOD2     | 5.268888239 | Tumor_G2 |
| 7748 | NOX4     | 1.168353067 | Tumor_G2 |
| 7749 | DUOX1    | 7.495302615 | Tumor_G2 |
| 7750 | DUOXA1   | 6.948452848 | Tumor_G2 |
| 7751 | DUOX2    | 8.680152861 | Tumor_G2 |
| 7752 | DUOXA2   | 7.084833344 | Tumor_G2 |
| 7753 | NDUFA1   | 7.774795171 | Tumor_G2 |
| 7754 | NDUFA2   | 6.447953092 | Tumor_G2 |
| 7755 | NDUFA8   | 7.050905569 | Tumor_G2 |
| 7756 | NDUFB1   | 5.473677359 | Tumor_G2 |
| 7757 | NDUFB10  | 7.204374952 | Tumor_G2 |
| 7758 | NDUFB2   | 6.301973832 | Tumor_G2 |

|      |          |             |          |
|------|----------|-------------|----------|
| 7759 | NDUFB3   | 6.137737346 | Tumor_G2 |
| 7760 | NDUFB7   | 8.495491606 | Tumor_G2 |
| 7761 | CYC1     | 6.752535427 | Tumor_G2 |
| 7762 | ETFB     | 4.997968306 | Tumor_G2 |
| 7763 | UQCR10   | 7.655657688 | Tumor_G2 |
| 7764 | UQCRQ    | 6.872339516 | Tumor_G2 |
| 7765 | UQCC3    | 4.233115165 | Tumor_G2 |
| 7766 | COX15    | 5.06428622  | Tumor_G2 |
| 7767 | COX5A    | 6.754429147 | Tumor_G2 |
| 7768 | COX6B1   | 8.597334868 | Tumor_G2 |
| 7769 | COX6C    | 6.441184879 | Tumor_G2 |
| 7770 | COX7A2   | 6.764064285 | Tumor_G2 |
| 7771 | COX7B    | 5.915498663 | Tumor_G2 |
| 7772 | COX8A    | 9.007602744 | Tumor_G2 |
| 7773 | SCO1     | 3.465157969 | Tumor_G2 |
| 7774 | SURF1    | 6.638586028 | Tumor_G2 |
| 7775 | ATP6V1E1 | 6.883999375 | Tumor_G2 |
| 7776 | DLAT     | 5.207683734 | Tumor_G2 |
| 7777 | PDC      | 0.311327722 | Tumor_G2 |
| 7778 | SUCLG2   | 6.187209065 | Tumor_G2 |
| 7779 | SLC25A5  | 7.719402817 | Tumor_G2 |
| 7780 | UCP2     | 9.371456413 | Tumor_G2 |
| 7781 | SOD2     | 5.177930953 | Tumor_G2 |
| 7782 | NOX4     | 3.055057058 | Tumor_G2 |
| 7783 | DUOX1    | 6.79149209  | Tumor_G2 |
| 7784 | DUOXA1   | 7.16927608  | Tumor_G2 |
| 7785 | DUOX2    | 7.314387048 | Tumor_G2 |
| 7786 | DUOXA2   | 5.03540936  | Tumor_G2 |
| 7787 | NDUFA1   | 8.349077647 | Tumor_G2 |
| 7788 | NDUFA2   | 7.041218592 | Tumor_G2 |
| 7789 | NDUFA8   | 7.423920712 | Tumor_G2 |
| 7790 | NDUFB1   | 6.242565021 | Tumor_G2 |
| 7791 | NDUFB10  | 7.746007438 | Tumor_G2 |
| 7792 | NDUFB2   | 6.929025978 | Tumor_G2 |
| 7793 | NDUFB3   | 6.628141685 | Tumor_G2 |
| 7794 | NDUFB7   | 9.133372205 | Tumor_G2 |
| 7795 | CYC1     | 7.087972838 | Tumor_G2 |
| 7796 | ETFB     | 5.386501653 | Tumor_G2 |
| 7797 | UQCR10   | 7.958008196 | Tumor_G2 |
| 7798 | UQCRQ    | 7.566993164 | Tumor_G2 |

|      |          |             |          |
|------|----------|-------------|----------|
| 7799 | UQCC3    | 4.626236682 | Tumor_G2 |
| 7800 | COX15    | 4.945489838 | Tumor_G2 |
| 7801 | COX5A    | 7.125600683 | Tumor_G2 |
| 7802 | COX6B1   | 8.90751072  | Tumor_G2 |
| 7803 | COX6C    | 6.847145404 | Tumor_G2 |
| 7804 | COX7A2   | 7.110854527 | Tumor_G2 |
| 7805 | COX7B    | 6.408090202 | Tumor_G2 |
| 7806 | COX8A    | 9.54746849  | Tumor_G2 |
| 7807 | SCO1     | 3.451567529 | Tumor_G2 |
| 7808 | SURF1    | 6.513992043 | Tumor_G2 |
| 7809 | ATP6V1E1 | 6.894304059 | Tumor_G2 |
| 7810 | DLAT     | 5.057055647 | Tumor_G2 |
| 7811 | PDC      | 0.205822444 | Tumor_G2 |
| 7812 | SUCLG2   | 5.91581023  | Tumor_G2 |
| 7813 | SLC25A5  | 8.211888245 | Tumor_G2 |
| 7814 | UCP2     | 7.479625114 | Tumor_G2 |
| 7815 | SOD2     | 4.87299902  | Tumor_G2 |
| 7816 | NOX4     | 2.491312408 | Tumor_G2 |
| 7817 | DUOX1    | 7.379089867 | Tumor_G2 |
| 7818 | DUOXA1   | 7.065634181 | Tumor_G2 |
| 7819 | DUOX2    | 8.239607727 | Tumor_G2 |
| 7820 | DUOXA2   | 5.989747532 | Tumor_G2 |
| 7821 | NDUFA1   | 8.071309588 | Tumor_G2 |
| 7822 | NDUFA2   | 6.716673053 | Tumor_G2 |
| 7823 | NDUFA8   | 7.039228257 | Tumor_G2 |
| 7824 | NDUFB1   | 5.627619017 | Tumor_G2 |
| 7825 | NDUFB10  | 7.39956658  | Tumor_G2 |
| 7826 | NDUFB2   | 6.647753994 | Tumor_G2 |
| 7827 | NDUFB3   | 6.372631573 | Tumor_G2 |
| 7828 | NDUFB7   | 8.615905643 | Tumor_G2 |
| 7829 | CYC1     | 7.149936491 | Tumor_G2 |
| 7830 | ETFB     | 5.061570215 | Tumor_G2 |
| 7831 | UQCR10   | 7.627941406 | Tumor_G2 |
| 7832 | UQCRQ    | 7.096751752 | Tumor_G2 |
| 7833 | UQCC3    | 4.064097129 | Tumor_G2 |
| 7834 | COX15    | 5.081181978 | Tumor_G2 |
| 7835 | COX5A    | 6.896643558 | Tumor_G2 |
| 7836 | COX6B1   | 8.764684927 | Tumor_G2 |
| 7837 | COX6C    | 6.351483786 | Tumor_G2 |
| 7838 | COX7A2   | 6.935670377 | Tumor_G2 |

|      |          |             |          |
|------|----------|-------------|----------|
| 7839 | COX7B    | 6.134878192 | Tumor_G2 |
| 7840 | COX8A    | 9.24072701  | Tumor_G2 |
| 7841 | SCO1     | 3.517171183 | Tumor_G2 |
| 7842 | SURF1    | 6.600194732 | Tumor_G2 |
| 7843 | ATP6V1E1 | 6.998021989 | Tumor_G2 |
| 7844 | DLAT     | 5.165432296 | Tumor_G2 |
| 7845 | PDC      | 0.151900311 | Tumor_G2 |
| 7846 | SUCLG2   | 6.370887261 | Tumor_G2 |
| 7847 | SLC25A5  | 8.415565985 | Tumor_G2 |
| 7848 | UCP2     | 8.07528966  | Tumor_G2 |
| 7849 | SOD2     | 5.270112661 | Tumor_G2 |
| 7850 | NOX4     | 1.01743273  | Tumor_G2 |
| 7851 | DUOX1    | 6.472349715 | Tumor_G2 |
| 7852 | DUOXA1   | 6.652782158 | Tumor_G2 |
| 7853 | DUOX2    | 6.900818276 | Tumor_G2 |
| 7854 | DUOXA2   | 4.837548706 | Tumor_G2 |
| 7855 | NDUFA1   | 8.263395878 | Tumor_G2 |
| 7856 | NDUFA2   | 6.986762769 | Tumor_G2 |
| 7857 | NDUFA8   | 7.160301654 | Tumor_G2 |
| 7858 | NDUFB1   | 5.937269897 | Tumor_G2 |
| 7859 | NDUFB10  | 7.515417796 | Tumor_G2 |
| 7860 | NDUFB2   | 6.85204661  | Tumor_G2 |
| 7861 | NDUFB3   | 6.506640601 | Tumor_G2 |
| 7862 | NDUFB7   | 8.90077829  | Tumor_G2 |
| 7863 | CYC1     | 6.99829738  | Tumor_G2 |
| 7864 | ETFB     | 5.351464382 | Tumor_G2 |
| 7865 | UQCR10   | 7.878469245 | Tumor_G2 |
| 7866 | UQCRQ    | 7.249249044 | Tumor_G2 |
| 7867 | UQCC3    | 4.556090144 | Tumor_G2 |
| 7868 | COX15    | 5.202046261 | Tumor_G2 |
| 7869 | COX5A    | 6.796661545 | Tumor_G2 |
| 7870 | COX6B1   | 8.729942075 | Tumor_G2 |
| 7871 | COX6C    | 6.657055323 | Tumor_G2 |
| 7872 | COX7A2   | 7.029690414 | Tumor_G2 |
| 7873 | COX7B    | 6.109994972 | Tumor_G2 |
| 7874 | COX8A    | 9.562773788 | Tumor_G2 |
| 7875 | SCO1     | 3.537066134 | Tumor_G2 |
| 7876 | SURF1    | 7.056053212 | Tumor_G2 |
| 7877 | ATP6V1E1 | 6.788931156 | Tumor_G2 |
| 7878 | DLAT     | 5.039270206 | Tumor_G2 |

|      |          |             |          |
|------|----------|-------------|----------|
| 7879 | PDC      | 0.269001598 | Tumor_G2 |
| 7880 | SUCLG2   | 6.274016473 | Tumor_G2 |
| 7881 | SLC25A5  | 8.120190741 | Tumor_G2 |
| 7882 | UCP2     | 6.799312774 | Tumor_G2 |
| 7883 | SOD2     | 4.845105279 | Tumor_G2 |
| 7884 | NOX4     | 0.849124947 | Tumor_G2 |
| 7885 | DUOX1    | 6.90382247  | Tumor_G2 |
| 7886 | DUOXA1   | 6.893215923 | Tumor_G2 |
| 7887 | DUOX2    | 7.443577805 | Tumor_G2 |
| 7888 | DUOXA2   | 5.637727969 | Tumor_G2 |
| 7889 | NDUFA1   | 8.287101433 | Tumor_G2 |
| 7890 | NDUFA2   | 6.972088966 | Tumor_G2 |
| 7891 | NDUFA8   | 7.110117822 | Tumor_G2 |
| 7892 | NDUFB1   | 5.795805177 | Tumor_G2 |
| 7893 | NDUFB10  | 7.69026126  | Tumor_G2 |
| 7894 | NDUFB2   | 6.774969348 | Tumor_G2 |
| 7895 | NDUFB3   | 6.24160073  | Tumor_G2 |
| 7896 | NDUFB7   | 8.733672477 | Tumor_G2 |
| 7897 | CYC1     | 6.762372079 | Tumor_G2 |
| 7898 | ETFB     | 4.819224598 | Tumor_G2 |
| 7899 | UQCR10   | 7.861920565 | Tumor_G2 |
| 7900 | UQCRQ    | 7.366548268 | Tumor_G2 |
| 7901 | UQCC3    | 4.39250079  | Tumor_G2 |
| 7902 | COX15    | 4.343473722 | Tumor_G2 |
| 7903 | COX5A    | 7.083836308 | Tumor_G2 |
| 7904 | COX6B1   | 8.934372808 | Tumor_G2 |
| 7905 | COX6C    | 6.670633162 | Tumor_G2 |
| 7906 | COX7A2   | 7.122996132 | Tumor_G2 |
| 7907 | COX7B    | 6.198747789 | Tumor_G2 |
| 7908 | COX8A    | 9.392125695 | Tumor_G2 |
| 7909 | SCO1     | 2.628156592 | Tumor_G2 |
| 7910 | SURF1    | 6.04809389  | Tumor_G2 |
| 7911 | ATP6V1E1 | 7.078076401 | Tumor_G2 |
| 7912 | DLAT     | 4.303973597 | Tumor_G2 |
| 7913 | PDC      | 0.282566845 | Tumor_G2 |
| 7914 | SUCLG2   | 5.66971595  | Tumor_G2 |
| 7915 | SLC25A5  | 7.771471955 | Tumor_G2 |
| 7916 | UCP2     | 8.423168615 | Tumor_G2 |
| 7917 | SOD2     | 4.592962046 | Tumor_G2 |
| 7918 | NOX4     | 2.39974501  | Tumor_G2 |

|      |          |             |          |
|------|----------|-------------|----------|
| 7919 | DUOX1    | 5.940871516 | Tumor_G2 |
| 7920 | DUOXA1   | 6.038029078 | Tumor_G2 |
| 7921 | DUOX2    | 4.895333396 | Tumor_G2 |
| 7922 | DUOXA2   | 3.638827645 | Tumor_G2 |
| 7923 | NDUFA1   | 8.515856384 | Tumor_G2 |
| 7924 | NDUFA2   | 6.973779623 | Tumor_G2 |
| 7925 | NDUFA8   | 7.220968902 | Tumor_G2 |
| 7926 | NDUFB1   | 6.053913292 | Tumor_G2 |
| 7927 | NDUFB10  | 7.656247986 | Tumor_G2 |
| 7928 | NDUFB2   | 6.720559787 | Tumor_G2 |
| 7929 | NDUFB3   | 6.650939586 | Tumor_G2 |
| 7930 | NDUFB7   | 8.853061929 | Tumor_G2 |
| 7931 | CYC1     | 6.884437864 | Tumor_G2 |
| 7932 | ETFB     | 5.35719319  | Tumor_G2 |
| 7933 | UQCR10   | 8.017858976 | Tumor_G2 |
| 7934 | UQCRQ    | 7.349477812 | Tumor_G2 |
| 7935 | UQCC3    | 4.596221528 | Tumor_G2 |
| 7936 | COX15    | 4.761905102 | Tumor_G2 |
| 7937 | COX5A    | 7.123444044 | Tumor_G2 |
| 7938 | COX6B1   | 9.045959397 | Tumor_G2 |
| 7939 | COX6C    | 6.775699743 | Tumor_G2 |
| 7940 | COX7A2   | 7.164371966 | Tumor_G2 |
| 7941 | COX7B    | 6.315321829 | Tumor_G2 |
| 7942 | COX8A    | 9.300658144 | Tumor_G2 |
| 7943 | SCO1     | 3.174078123 | Tumor_G2 |
| 7944 | SURF1    | 6.618812421 | Tumor_G2 |
| 7945 | ATP6V1E1 | 6.934885291 | Tumor_G2 |
| 7946 | DLAT     | 4.690392811 | Tumor_G2 |
| 7947 | PDC      | 0.170514497 | Tumor_G2 |
| 7948 | SUCLG2   | 5.979244811 | Tumor_G2 |
| 7949 | SLC25A5  | 7.821579187 | Tumor_G2 |
| 7950 | UCP2     | 9.023724231 | Tumor_G2 |
| 7951 | SOD2     | 5.052248086 | Tumor_G2 |
| 7952 | NOX4     | 1.623207975 | Tumor_G2 |
| 7953 | DUOX1    | 6.694197412 | Tumor_G2 |
| 7954 | DUOXA1   | 6.7492651   | Tumor_G2 |
| 7955 | DUOX2    | 7.723849009 | Tumor_G2 |
| 7956 | DUOXA2   | 6.279430357 | Tumor_G2 |
| 7957 | NDUFA1   | 8.308414676 | Tumor_G2 |
| 7958 | NDUFA2   | 7.047944625 | Tumor_G2 |

|      |          |             |          |
|------|----------|-------------|----------|
| 7959 | NDUFA8   | 7.337747739 | Tumor_G2 |
| 7960 | NDUFB1   | 6.125379078 | Tumor_G2 |
| 7961 | NDUFB10  | 8.081013815 | Tumor_G2 |
| 7962 | NDUFB2   | 6.806894584 | Tumor_G2 |
| 7963 | NDUFB3   | 6.450307162 | Tumor_G2 |
| 7964 | NDUFB7   | 9.139569463 | Tumor_G2 |
| 7965 | CYC1     | 6.995571519 | Tumor_G2 |
| 7966 | ETFB     | 5.573826805 | Tumor_G2 |
| 7967 | UQCR10   | 7.989935189 | Tumor_G2 |
| 7968 | UQCRQ    | 7.594062185 | Tumor_G2 |
| 7969 | UQCC3    | 4.980981544 | Tumor_G2 |
| 7970 | COX15    | 4.793153597 | Tumor_G2 |
| 7971 | COX5A    | 7.26138544  | Tumor_G2 |
| 7972 | COX6B1   | 8.910704415 | Tumor_G2 |
| 7973 | COX6C    | 6.713613226 | Tumor_G2 |
| 7974 | COX7A2   | 7.003511387 | Tumor_G2 |
| 7975 | COX7B    | 6.223525191 | Tumor_G2 |
| 7976 | COX8A    | 9.76768712  | Tumor_G2 |
| 7977 | SCO1     | 3.210633999 | Tumor_G2 |
| 7978 | SURF1    | 6.742808388 | Tumor_G2 |
| 7979 | ATP6V1E1 | 6.809323688 | Tumor_G2 |
| 7980 | DLAT     | 4.702494409 | Tumor_G2 |
| 7981 | PDC      | 0.263065294 | Tumor_G2 |
| 7982 | SUCLG2   | 5.924123745 | Tumor_G2 |
| 7983 | SLC25A5  | 7.583766817 | Tumor_G2 |
| 7984 | UCP2     | 8.857997081 | Tumor_G2 |
| 7985 | SOD2     | 4.246104951 | Tumor_G2 |
| 7986 | NOX4     | 1.517472339 | Tumor_G2 |
| 7987 | DUOX1    | 7.1413928   | Tumor_G2 |
| 7988 | DUOXA1   | 7.030186205 | Tumor_G2 |
| 7989 | DUOX2    | 7.954888652 | Tumor_G2 |
| 7990 | DUOXA2   | 6.448023061 | Tumor_G2 |
| 7991 | NDUFA1   | 8.149698354 | Tumor_G2 |
| 7992 | NDUFA2   | 6.797724783 | Tumor_G2 |
| 7993 | NDUFA8   | 6.989281456 | Tumor_G2 |
| 7994 | NDUFB1   | 5.782221563 | Tumor_G2 |
| 7995 | NDUFB10  | 7.393601342 | Tumor_G2 |
| 7996 | NDUFB2   | 6.741176902 | Tumor_G2 |
| 7997 | NDUFB3   | 6.591841654 | Tumor_G2 |
| 7998 | NDUFB7   | 8.327345352 | Tumor_G2 |



|      |          |             |          |
|------|----------|-------------|----------|
| 7999 | CYC1     | 6.970416148 | Tumor_G2 |
| 8000 | ETFB     | 4.859533578 | Tumor_G2 |
| 8001 | UQCR10   | 7.683015264 | Tumor_G2 |
| 8002 | UQCRQ    | 7.075480779 | Tumor_G2 |
| 8003 | UQCC3    | 3.821837855 | Tumor_G2 |
| 8004 | COX15    | 5.110624663 | Tumor_G2 |
| 8005 | COX5A    | 6.972782739 | Tumor_G2 |
| 8006 | COX6B1   | 8.610984019 | Tumor_G2 |
| 8007 | COX6C    | 6.598574323 | Tumor_G2 |
| 8008 | COX7A2   | 7.00474146  | Tumor_G2 |
| 8009 | COX7B    | 6.283706337 | Tumor_G2 |
| 8010 | COX8A    | 9.214073582 | Tumor_G2 |
| 8011 | SCO1     | 3.328865783 | Tumor_G2 |
| 8012 | SURF1    | 6.288854011 | Tumor_G2 |
| 8013 | ATP6V1E1 | 7.114631139 | Tumor_G2 |
| 8014 | DLAT     | 5.168646968 | Tumor_G2 |
| 8015 | PDC      | 0           | Tumor_G2 |
| 8016 | SUCLG2   | 6.491180894 | Tumor_G2 |
| 8017 | SLC25A5  | 8.301420682 | Tumor_G2 |
| 8018 | UCP2     | 7.23360497  | Tumor_G2 |
| 8019 | SOD2     | 5.381791076 | Tumor_G2 |
| 8020 | NOX4     | 1.81553736  | Tumor_G2 |
| 8021 | DUOX1    | 6.44220419  | Tumor_G2 |
| 8022 | DUOXA1   | 6.275961509 | Tumor_G2 |
| 8023 | DUOX2    | 6.523865125 | Tumor_G2 |
| 8024 | DUOXA2   | 4.314921905 | Tumor_G2 |
| 8025 | NDUFA1   | 8.304201076 | Tumor_G2 |
| 8026 | NDUFA2   | 7.244148425 | Tumor_G2 |
| 8027 | NDUFA8   | 7.066187781 | Tumor_G2 |
| 8028 | NDUFB1   | 5.974361436 | Tumor_G2 |
| 8029 | NDUFB10  | 7.904132964 | Tumor_G2 |
| 8030 | NDUFB2   | 6.989989919 | Tumor_G2 |
| 8031 | NDUFB3   | 6.559750168 | Tumor_G2 |
| 8032 | NDUFB7   | 9.003247872 | Tumor_G2 |
| 8033 | CYC1     | 7.151027582 | Tumor_G2 |
| 8034 | ETFB     | 5.314459947 | Tumor_G2 |
| 8035 | UQCR10   | 8.024810869 | Tumor_G2 |
| 8036 | UQCRQ    | 7.681781491 | Tumor_G2 |
| 8037 | UQCC3    | 4.679948539 | Tumor_G2 |
| 8038 | COX15    | 4.817615728 | Tumor_G2 |

|      |          |             |          |
|------|----------|-------------|----------|
| 8039 | COX5A    | 7.312712638 | Tumor_G2 |
| 8040 | COX6B1   | 9.024450188 | Tumor_G2 |
| 8041 | COX6C    | 6.791118221 | Tumor_G2 |
| 8042 | COX7A2   | 7.257356658 | Tumor_G2 |
| 8043 | COX7B    | 6.309572036 | Tumor_G2 |
| 8044 | COX8A    | 9.783413158 | Tumor_G2 |
| 8045 | SCO1     | 3.056797735 | Tumor_G2 |
| 8046 | SURF1    | 6.088303318 | Tumor_G2 |
| 8047 | ATP6V1E1 | 7.465150277 | Tumor_G2 |
| 8048 | DLAT     | 4.983615756 | Tumor_G2 |
| 8049 | PDC      | 0.04488562  | Tumor_G2 |
| 8050 | SUCLG2   | 6.320698412 | Tumor_G2 |
| 8051 | SLC25A5  | 8.377044318 | Tumor_G2 |
| 8052 | UCP2     | 8.3313742   | Tumor_G2 |
| 8053 | SOD2     | 5.081112243 | Tumor_G2 |
| 8054 | NOX4     | 1.989459857 | Tumor_G2 |
| 8055 | DUOX1    | 6.008429619 | Tumor_G2 |
| 8056 | DUOXA1   | 6.224358733 | Tumor_G2 |
| 8057 | DUOX2    | 5.851542326 | Tumor_G2 |
| 8058 | DUOXA2   | 4.411360756 | Tumor_G2 |
| 8059 | NDUFA1   | 8.387538885 | Tumor_G2 |
| 8060 | NDUFA2   | 7.166020607 | Tumor_G2 |
| 8061 | NDUFA8   | 7.069434727 | Tumor_G2 |
| 8062 | NDUFB1   | 5.844816959 | Tumor_G2 |
| 8063 | NDUFB10  | 7.65226505  | Tumor_G2 |
| 8064 | NDUFB2   | 6.909582433 | Tumor_G2 |
| 8065 | NDUFB3   | 6.627552425 | Tumor_G2 |
| 8066 | NDUFB7   | 8.619639218 | Tumor_G2 |
| 8067 | CYC1     | 6.840615515 | Tumor_G2 |
| 8068 | ETFB     | 4.921705215 | Tumor_G2 |
| 8069 | UQCR10   | 7.806437743 | Tumor_G2 |
| 8070 | UQCRQ    | 7.534335181 | Tumor_G2 |
| 8071 | UQCC3    | 4.478367292 | Tumor_G2 |
| 8072 | COX15    | 4.618661124 | Tumor_G2 |
| 8073 | COX5A    | 7.586087524 | Tumor_G2 |
| 8074 | COX6B1   | 8.904623702 | Tumor_G2 |
| 8075 | COX6C    | 6.66482937  | Tumor_G2 |
| 8076 | COX7A2   | 7.18408717  | Tumor_G2 |
| 8077 | COX7B    | 6.189309145 | Tumor_G2 |
| 8078 | COX8A    | 9.583512018 | Tumor_G2 |

|      |          |             |          |
|------|----------|-------------|----------|
| 8079 | SCO1     | 3.120186351 | Tumor_G2 |
| 8080 | SURF1    | 6.038191378 | Tumor_G2 |
| 8081 | ATP6V1E1 | 7.286060504 | Tumor_G2 |
| 8082 | DLAT     | 5.131355791 | Tumor_G2 |
| 8083 | PDC      | 0.042809399 | Tumor_G2 |
| 8084 | SUCLG2   | 6.395310668 | Tumor_G2 |
| 8085 | SLC25A5  | 8.30678696  | Tumor_G2 |
| 8086 | UCP2     | 8.419369641 | Tumor_G2 |
| 8087 | SOD2     | 5.328737205 | Tumor_G2 |
| 8088 | NOX4     | 2.281972558 | Tumor_G2 |
| 8089 | DUOX1    | 5.418661671 | Tumor_G2 |
| 8090 | DUOXA1   | 5.706227932 | Tumor_G2 |
| 8091 | DUOX2    | 5.594173987 | Tumor_G2 |
| 8092 | DUOXA2   | 4.227450948 | Tumor_G2 |
| 8093 | NDUFA1   | 7.96833253  | Tumor_G2 |
| 8094 | NDUFA2   | 6.528783429 | Tumor_G2 |
| 8095 | NDUFA8   | 7.056231858 | Tumor_G2 |
| 8096 | NDUFB1   | 5.630346025 | Tumor_G2 |
| 8097 | NDUFB10  | 7.594198089 | Tumor_G2 |
| 8098 | NDUFB2   | 6.696522974 | Tumor_G2 |
| 8099 | NDUFB3   | 6.450366145 | Tumor_G2 |
| 8100 | NDUFB7   | 8.573751323 | Tumor_G2 |
| 8101 | CYC1     | 6.761074732 | Tumor_G2 |
| 8102 | ETFB     | 5.025676198 | Tumor_G2 |
| 8103 | UQCR10   | 7.507265315 | Tumor_G2 |
| 8104 | UQCRQ    | 7.187623246 | Tumor_G2 |
| 8105 | UQCC3    | 4.250799544 | Tumor_G2 |
| 8106 | COX15    | 4.729371617 | Tumor_G2 |
| 8107 | COX5A    | 7.045457915 | Tumor_G2 |
| 8108 | COX6B1   | 8.702749982 | Tumor_G2 |
| 8109 | COX6C    | 6.430121162 | Tumor_G2 |
| 8110 | COX7A2   | 7.006662073 | Tumor_G2 |
| 8111 | COX7B    | 6.097154263 | Tumor_G2 |
| 8112 | COX8A    | 9.595830427 | Tumor_G2 |
| 8113 | SCO1     | 3.406414019 | Tumor_G2 |
| 8114 | SURF1    | 6.407924546 | Tumor_G2 |
| 8115 | ATP6V1E1 | 6.950672319 | Tumor_G2 |
| 8116 | DLAT     | 4.997684883 | Tumor_G2 |
| 8117 | PDC      | 0.309805891 | Tumor_G2 |
| 8118 | SUCLG2   | 5.931718515 | Tumor_G2 |

|      |          |             |          |
|------|----------|-------------|----------|
| 8119 | SLC25A5  | 7.966607637 | Tumor_G2 |
| 8120 | UCP2     | 9.351769658 | Tumor_G2 |
| 8121 | SOD2     | 4.49924137  | Tumor_G2 |
| 8122 | NOX4     | 2.286446041 | Tumor_G2 |
| 8123 | DUOX1    | 6.599638324 | Tumor_G2 |
| 8124 | DUOXA1   | 6.885905535 | Tumor_G2 |
| 8125 | DUOX2    | 6.890799783 | Tumor_G2 |
| 8126 | DUOXA2   | 4.180581198 | Tumor_G2 |
| 8127 | NDUFA1   | 8.124450575 | Tumor_G2 |
| 8128 | NDUFA2   | 6.617546701 | Tumor_G2 |
| 8129 | NDUFA8   | 6.988353568 | Tumor_G2 |
| 8130 | NDUFB1   | 5.555585945 | Tumor_G2 |
| 8131 | NDUFB10  | 7.201244924 | Tumor_G2 |
| 8132 | NDUFB2   | 6.667802803 | Tumor_G2 |
| 8133 | NDUFB3   | 6.540567304 | Tumor_G2 |
| 8134 | NDUFB7   | 8.555236411 | Tumor_G2 |
| 8135 | CYC1     | 6.698838374 | Tumor_G2 |
| 8136 | ETFB     | 5.030863519 | Tumor_G2 |
| 8137 | UQCR10   | 7.425521779 | Tumor_G2 |
| 8138 | UQCRQ    | 7.273868137 | Tumor_G2 |
| 8139 | UQCC3    | 4.320300557 | Tumor_G2 |
| 8140 | COX15    | 4.757740496 | Tumor_G2 |
| 8141 | COX5A    | 7.022819593 | Tumor_G2 |
| 8142 | COX6B1   | 8.635368185 | Tumor_G2 |
| 8143 | COX6C    | 6.217729501 | Tumor_G2 |
| 8144 | COX7A2   | 6.833591178 | Tumor_G2 |
| 8145 | COX7B    | 5.919573384 | Tumor_G2 |
| 8146 | COX8A    | 9.427018844 | Tumor_G2 |
| 8147 | SCO1     | 3.244436509 | Tumor_G2 |
| 8148 | SURF1    | 6.210012545 | Tumor_G2 |
| 8149 | ATP6V1E1 | 7.12200657  | Tumor_G2 |
| 8150 | DLAT     | 5.057380915 | Tumor_G2 |
| 8151 | PDC      | 0.137838147 | Tumor_G2 |
| 8152 | SUCLG2   | 6.065277828 | Tumor_G2 |
| 8153 | SLC25A5  | 7.650124975 | Tumor_G2 |
| 8154 | UCP2     | 8.487806305 | Tumor_G2 |
| 8155 | SOD2     | 4.739303398 | Tumor_G2 |
| 8156 | NOX4     | 2.392346366 | Tumor_G2 |
| 8157 | DUOX1    | 5.947844875 | Tumor_G2 |
| 8158 | DUOXA1   | 6.254146155 | Tumor_G2 |

|      |          |             |          |
|------|----------|-------------|----------|
| 8159 | DUOX2    | 6.235122762 | Tumor_G2 |
| 8160 | DUOXA2   | 4.916791232 | Tumor_G2 |
| 8161 | NDUFA1   | 8.459208043 | Tumor_G2 |
| 8162 | NDUFA2   | 7.100778129 | Tumor_G2 |
| 8163 | NDUFA8   | 7.337127443 | Tumor_G2 |
| 8164 | NDUFB1   | 6.22868287  | Tumor_G2 |
| 8165 | NDUFB10  | 7.657735283 | Tumor_G2 |
| 8166 | NDUFB2   | 7.128933196 | Tumor_G2 |
| 8167 | NDUFB3   | 6.806053318 | Tumor_G2 |
| 8168 | NDUFB7   | 8.858006182 | Tumor_G2 |
| 8169 | CYC1     | 7.146419444 | Tumor_G2 |
| 8170 | ETFB     | 5.123165128 | Tumor_G2 |
| 8171 | UQCR10   | 7.955546781 | Tumor_G2 |
| 8172 | UQCRQ    | 7.82477491  | Tumor_G2 |
| 8173 | UQCC3    | 4.718972707 | Tumor_G2 |
| 8174 | COX15    | 4.271420565 | Tumor_G2 |
| 8175 | COX5A    | 7.343798202 | Tumor_G2 |
| 8176 | COX6B1   | 9.063788096 | Tumor_G2 |
| 8177 | COX6C    | 6.607669764 | Tumor_G2 |
| 8178 | COX7A2   | 7.336349812 | Tumor_G2 |
| 8179 | COX7B    | 6.564243265 | Tumor_G2 |
| 8180 | COX8A    | 9.796578117 | Tumor_G2 |
| 8181 | SCO1     | 3.363417826 | Tumor_G2 |
| 8182 | SURF1    | 6.265918793 | Tumor_G2 |
| 8183 | ATP6V1E1 | 7.319731881 | Tumor_G2 |
| 8184 | DLAT     | 5.059011676 | Tumor_G2 |
| 8185 | PDC      | 0.105089014 | Tumor_G2 |
| 8186 | SUCLG2   | 6.015361944 | Tumor_G2 |
| 8187 | SLC25A5  | 8.311738522 | Tumor_G2 |
| 8188 | UCP2     | 9.421423406 | Tumor_G2 |
| 8189 | SOD2     | 4.626702637 | Tumor_G2 |
| 8190 | NOX4     | 2.95667247  | Tumor_G2 |
| 8191 | DUOX1    | 5.865071398 | Tumor_G2 |
| 8192 | DUOXA1   | 6.474223177 | Tumor_G2 |
| 8193 | DUOX2    | 6.223150139 | Tumor_G2 |
| 8194 | DUOXA2   | 4.907743418 | Tumor_G2 |
| 8195 | NDUFA1   | 7.820251494 | Tumor_G2 |
| 8196 | NDUFA2   | 6.558163036 | Tumor_G2 |
| 8197 | NDUFA8   | 7.035126788 | Tumor_G2 |
| 8198 | NDUFB1   | 5.506000715 | Tumor_G2 |

|      |          |             |          |
|------|----------|-------------|----------|
| 8199 | NDUFB10  | 7.374200821 | Tumor_G2 |
| 8200 | NDUFB2   | 6.576218351 | Tumor_G2 |
| 8201 | NDUFB3   | 6.172679113 | Tumor_G2 |
| 8202 | NDUFB7   | 8.295775238 | Tumor_G2 |
| 8203 | CYC1     | 7.291961926 | Tumor_G2 |
| 8204 | ETFB     | 5.248174107 | Tumor_G2 |
| 8205 | UQCR10   | 6.4707038   | Tumor_G2 |
| 8206 | UQCRQ    | 7.141039203 | Tumor_G2 |
| 8207 | UQCC3    | 4.183977769 | Tumor_G2 |
| 8208 | COX15    | 4.810811748 | Tumor_G2 |
| 8209 | COX5A    | 7.093940105 | Tumor_G2 |
| 8210 | COX6B1   | 8.192768307 | Tumor_G2 |
| 8211 | COX6C    | 6.102845268 | Tumor_G2 |
| 8212 | COX7A2   | 6.699315476 | Tumor_G2 |
| 8213 | COX7B    | 5.829789417 | Tumor_G2 |
| 8214 | COX8A    | 9.604631589 | Tumor_G2 |
| 8215 | SCO1     | 3.132394811 | Tumor_G2 |
| 8216 | SURF1    | 6.288305457 | Tumor_G2 |
| 8217 | ATP6V1E1 | 6.229823796 | Tumor_G2 |
| 8218 | DLAT     | 4.743945861 | Tumor_G2 |
| 8219 | PDC      | 0.135517244 | Tumor_G2 |
| 8220 | SUCLG2   | 6.583681533 | Tumor_G2 |
| 8221 | SLC25A5  | 8.575203307 | Tumor_G2 |
| 8222 | UCP2     | 7.955162316 | Tumor_G2 |
| 8223 | SOD2     | 3.874352663 | Tumor_G2 |
| 8224 | NOX4     | 1.837661871 | Tumor_G2 |
| 8225 | DUOX1    | 7.167648087 | Tumor_G2 |
| 8226 | DUOXA1   | 6.298670782 | Tumor_G2 |
| 8227 | DUOX2    | 9.525120385 | Tumor_G2 |
| 8228 | DUOXA2   | 7.339653707 | Tumor_G2 |
| 8229 | NDUFA1   | 8.049111015 | Tumor_G2 |
| 8230 | NDUFA2   | 6.868252912 | Tumor_G2 |
| 8231 | NDUFA8   | 7.117516215 | Tumor_G2 |
| 8232 | NDUFB1   | 5.932874748 | Tumor_G2 |
| 8233 | NDUFB10  | 7.545447139 | Tumor_G2 |
| 8234 | NDUFB2   | 6.801660595 | Tumor_G2 |
| 8235 | NDUFB3   | 6.474255591 | Tumor_G2 |
| 8236 | NDUFB7   | 8.844480579 | Tumor_G2 |
| 8237 | CYC1     | 6.847471942 | Tumor_G2 |
| 8238 | ETFB     | 5.129917709 | Tumor_G2 |

|      |          |             |          |
|------|----------|-------------|----------|
| 8239 | UQCR10   | 7.716290393 | Tumor_G2 |
| 8240 | UQCRQ    | 7.483124882 | Tumor_G2 |
| 8241 | UQCC3    | 4.685274303 | Tumor_G2 |
| 8242 | COX15    | 4.852229882 | Tumor_G2 |
| 8243 | COX5A    | 6.999480277 | Tumor_G2 |
| 8244 | COX6B1   | 8.586900838 | Tumor_G2 |
| 8245 | COX6C    | 6.422619896 | Tumor_G2 |
| 8246 | COX7A2   | 6.794905441 | Tumor_G2 |
| 8247 | COX7B    | 6.036417421 | Tumor_G2 |
| 8248 | COX8A    | 9.656285194 | Tumor_G2 |
| 8249 | SCO1     | 3.254732709 | Tumor_G2 |
| 8250 | SURF1    | 6.60435662  | Tumor_G2 |
| 8251 | ATP6V1E1 | 6.686708816 | Tumor_G2 |
| 8252 | DLAT     | 4.834826675 | Tumor_G2 |
| 8253 | PDC      | 0.062150993 | Tumor_G2 |
| 8254 | SUCLG2   | 6.005748369 | Tumor_G2 |
| 8255 | SLC25A5  | 8.084263545 | Tumor_G2 |
| 8256 | UCP2     | 7.455795071 | Tumor_G2 |
| 8257 | SOD2     | 4.75053995  | Tumor_G2 |
| 8258 | NOX4     | 1.315612763 | Tumor_G2 |
| 8259 | DUOX1    | 7.659486061 | Tumor_G2 |
| 8260 | DUOXA1   | 7.423635388 | Tumor_G2 |
| 8261 | DUOX2    | 8.400969385 | Tumor_G2 |
| 8262 | DUOXA2   | 6.314002644 | Tumor_G2 |
| 8263 | NDUFA1   | 7.969258087 | Tumor_G2 |
| 8264 | NDUFA2   | 6.703781214 | Tumor_G2 |
| 8265 | NDUFA8   | 7.250229493 | Tumor_G2 |
| 8266 | NDUFB1   | 5.754133799 | Tumor_G2 |
| 8267 | NDUFB10  | 7.757284172 | Tumor_G2 |
| 8268 | NDUFB2   | 6.412763043 | Tumor_G2 |
| 8269 | NDUFB3   | 6.108870181 | Tumor_G2 |
| 8270 | NDUFB7   | 8.698507511 | Tumor_G2 |
| 8271 | CYC1     | 6.957298128 | Tumor_G2 |
| 8272 | ETFB     | 4.955381365 | Tumor_G2 |
| 8273 | UQCR10   | 7.586182558 | Tumor_G2 |
| 8274 | UQCRQ    | 7.263083214 | Tumor_G2 |
| 8275 | UQCC3    | 4.667661807 | Tumor_G2 |
| 8276 | COX15    | 5.043427431 | Tumor_G2 |
| 8277 | COX5A    | 7.100630608 | Tumor_G2 |
| 8278 | COX6B1   | 8.565625802 | Tumor_G2 |

|      |          |             |          |
|------|----------|-------------|----------|
| 8279 | COX6C    | 6.499289787 | Tumor_G2 |
| 8280 | COX7A2   | 6.849745158 | Tumor_G2 |
| 8281 | COX7B    | 6.000497129 | Tumor_G2 |
| 8282 | COX8A    | 9.390986472 | Tumor_G2 |
| 8283 | SCO1     | 3.44741242  | Tumor_G2 |
| 8284 | SURF1    | 6.349516256 | Tumor_G2 |
| 8285 | ATP6V1E1 | 6.761387189 | Tumor_G2 |
| 8286 | DLAT     | 5.134372133 | Tumor_G2 |
| 8287 | PDC      | 0.127173967 | Tumor_G2 |
| 8288 | SUCLG2   | 5.913607437 | Tumor_G2 |
| 8289 | SLC25A5  | 7.961532967 | Tumor_G2 |
| 8290 | UCP2     | 8.237624457 | Tumor_G2 |
| 8291 | SOD2     | 4.695024964 | Tumor_G2 |
| 8292 | NOX4     | 2.708415694 | Tumor_G2 |
| 8293 | DUOX1    | 7.308200115 | Tumor_G2 |
| 8294 | DUOXA1   | 7.072770292 | Tumor_G2 |
| 8295 | DUOX2    | 6.917489329 | Tumor_G2 |
| 8296 | DUOXA2   | 5.855813265 | Tumor_G2 |
| 8297 | NDUFA1   | 8.49618894  | Tumor_G2 |
| 8298 | NDUFA2   | 7.364853093 | Tumor_G2 |
| 8299 | NDUFA8   | 7.370595743 | Tumor_G2 |
| 8300 | NDUFB1   | 6.482595387 | Tumor_G2 |
| 8301 | NDUFB10  | 7.859278002 | Tumor_G2 |
| 8302 | NDUFB2   | 6.658359724 | Tumor_G2 |
| 8303 | NDUFB3   | 5.749504019 | Tumor_G2 |
| 8304 | NDUFB7   | 9.41530947  | Tumor_G2 |
| 8305 | CYC1     | 6.28589262  | Tumor_G2 |
| 8306 | ETFB     | 5.474148886 | Tumor_G2 |
| 8307 | UQCR10   | 6.943761634 | Tumor_G2 |
| 8308 | UQCRQ    | 7.822889812 | Tumor_G2 |
| 8309 | UQCC3    | 4.742422477 | Tumor_G2 |
| 8310 | COX15    | 4.282227291 | Tumor_G2 |
| 8311 | COX5A    | 5.989136018 | Tumor_G2 |
| 8312 | COX6B1   | 9.357318099 | Tumor_G2 |
| 8313 | COX6C    | 6.925601982 | Tumor_G2 |
| 8314 | COX7A2   | 6.695177522 | Tumor_G2 |
| 8315 | COX7B    | 6.142042811 | Tumor_G2 |
| 8316 | COX8A    | 9.504796138 | Tumor_G2 |
| 8317 | SCO1     | 2.379163082 | Tumor_G2 |
| 8318 | SURF1    | 5.952637656 | Tumor_G2 |



|      |          |             |          |
|------|----------|-------------|----------|
| 8319 | ATP6V1E1 | 6.214785231 | Tumor_G2 |
| 8320 | DLAT     | 3.99548067  | Tumor_G2 |
| 8321 | PDC      | 0.060473683 | Tumor_G2 |
| 8322 | SUCLG2   | 5.697193477 | Tumor_G2 |
| 8323 | SLC25A5  | 6.91372231  | Tumor_G2 |
| 8324 | UCP2     | 8.376549553 | Tumor_G2 |
| 8325 | SOD2     | 3.164744698 | Tumor_G2 |
| 8326 | NOX4     | 1.577252567 | Tumor_G2 |
| 8327 | DUOX1    | 6.237688693 | Tumor_G2 |
| 8328 | DUOXA1   | 5.748469604 | Tumor_G2 |
| 8329 | DUOX2    | 7.873122347 | Tumor_G2 |
| 8330 | DUOXA2   | 5.923067759 | Tumor_G2 |
| 8331 | NDUFA1   | 8.239991952 | Tumor_G2 |
| 8332 | NDUFA2   | 6.887907008 | Tumor_G2 |
| 8333 | NDUFA8   | 7.110075123 | Tumor_G2 |
| 8334 | NDUFB1   | 5.997228489 | Tumor_G2 |
| 8335 | NDUFB10  | 7.58175355  | Tumor_G2 |
| 8336 | NDUFB2   | 6.421767975 | Tumor_G2 |
| 8337 | NDUFB3   | 6.31621998  | Tumor_G2 |
| 8338 | NDUFB7   | 8.825828881 | Tumor_G2 |
| 8339 | CYC1     | 6.784388481 | Tumor_G2 |
| 8340 | ETFB     | 4.974061317 | Tumor_G2 |
| 8341 | UQCR10   | 7.753348693 | Tumor_G2 |
| 8342 | UQCRQ    | 7.259458593 | Tumor_G2 |
| 8343 | UQCC3    | 4.682876963 | Tumor_G2 |
| 8344 | COX15    | 4.381494109 | Tumor_G2 |
| 8345 | COX5A    | 6.929386232 | Tumor_G2 |
| 8346 | COX6B1   | 8.913657823 | Tumor_G2 |
| 8347 | COX6C    | 6.770178856 | Tumor_G2 |
| 8348 | COX7A2   | 6.996721486 | Tumor_G2 |
| 8349 | COX7B    | 6.202922276 | Tumor_G2 |
| 8350 | COX8A    | 9.431081927 | Tumor_G2 |
| 8351 | SCO1     | 3.068737264 | Tumor_G2 |
| 8352 | SURF1    | 6.509675755 | Tumor_G2 |
| 8353 | ATP6V1E1 | 6.730050887 | Tumor_G2 |
| 8354 | DLAT     | 4.809987467 | Tumor_G2 |
| 8355 | PDC      | 0.259433974 | Tumor_G2 |
| 8356 | SUCLG2   | 5.882243997 | Tumor_G2 |
| 8357 | SLC25A5  | 7.880636874 | Tumor_G2 |
| 8358 | UCP2     | 8.598992937 | Tumor_G2 |

|      |          |             |          |
|------|----------|-------------|----------|
| 8359 | SOD2     | 4.747005185 | Tumor_G2 |
| 8360 | NOX4     | 2.978283584 | Tumor_G2 |
| 8361 | DUOX1    | 6.460132263 | Tumor_G2 |
| 8362 | DUOXA1   | 6.96488357  | Tumor_G2 |
| 8363 | DUOX2    | 6.891719922 | Tumor_G2 |
| 8364 | DUOXA2   | 4.583220054 | Tumor_G2 |
| 8365 | NDUFA1   | 7.894495791 | Tumor_G2 |
| 8366 | NDUFA2   | 6.612934572 | Tumor_G2 |
| 8367 | NDUFA8   | 7.040199546 | Tumor_G2 |
| 8368 | NDUFB1   | 5.688712067 | Tumor_G2 |
| 8369 | NDUFB10  | 7.304300483 | Tumor_G2 |
| 8370 | NDUFB2   | 6.575067889 | Tumor_G2 |
| 8371 | NDUFB3   | 6.313286723 | Tumor_G2 |
| 8372 | NDUFB7   | 8.469367257 | Tumor_G2 |
| 8373 | CYC1     | 6.903762764 | Tumor_G2 |
| 8374 | ETFB     | 4.800871774 | Tumor_G2 |
| 8375 | UQCR10   | 7.454188908 | Tumor_G2 |
| 8376 | UQCRQ    | 7.021572563 | Tumor_G2 |
| 8377 | UQCC3    | 4.232265881 | Tumor_G2 |
| 8378 | COX15    | 4.778355375 | Tumor_G2 |
| 8379 | COX5A    | 7.023274203 | Tumor_G2 |
| 8380 | COX6B1   | 8.351919818 | Tumor_G2 |
| 8381 | COX6C    | 6.37132531  | Tumor_G2 |
| 8382 | COX7A2   | 6.675422855 | Tumor_G2 |
| 8383 | COX7B    | 6.164155579 | Tumor_G2 |
| 8384 | COX8A    | 9.51542152  | Tumor_G2 |
| 8385 | SCO1     | 3.520044317 | Tumor_G2 |
| 8386 | SURF1    | 6.021900182 | Tumor_G2 |
| 8387 | ATP6V1E1 | 6.470200544 | Tumor_G2 |
| 8388 | DLAT     | 5.235947033 | Tumor_G2 |
| 8389 | PDC      | 0.259378496 | Tumor_G2 |
| 8390 | SUCLG2   | 6.334809067 | Tumor_G2 |
| 8391 | SLC25A5  | 8.140446144 | Tumor_G2 |
| 8392 | UCP2     | 7.931352194 | Tumor_G2 |
| 8393 | SOD2     | 5.256411523 | Tumor_G2 |
| 8394 | NOX4     | 1.075561238 | Tumor_G2 |
| 8395 | DUOX1    | 7.303479424 | Tumor_G2 |
| 8396 | DUOXA1   | 6.94559434  | Tumor_G2 |
| 8397 | DUOX2    | 8.08795281  | Tumor_G2 |
| 8398 | DUOXA2   | 6.037920693 | Tumor_G2 |

|      |          |             |          |
|------|----------|-------------|----------|
| 8399 | NDUFA1   | 7.865640196 | Tumor_G2 |
| 8400 | NDUFA2   | 6.815502763 | Tumor_G2 |
| 8401 | NDUFA8   | 7.179459867 | Tumor_G2 |
| 8402 | NDUFB1   | 5.753317387 | Tumor_G2 |
| 8403 | NDUFB10  | 7.68624058  | Tumor_G2 |
| 8404 | NDUFB2   | 6.822755468 | Tumor_G2 |
| 8405 | NDUFB3   | 6.358714953 | Tumor_G2 |
| 8406 | NDUFB7   | 8.919185287 | Tumor_G2 |
| 8407 | CYC1     | 6.971853889 | Tumor_G2 |
| 8408 | ETFB     | 5.180573559 | Tumor_G2 |
| 8409 | UQCR10   | 7.788644099 | Tumor_G2 |
| 8410 | UQCRQ    | 7.542460565 | Tumor_G2 |
| 8411 | UQCC3    | 4.546425449 | Tumor_G2 |
| 8412 | COX15    | 4.76988447  | Tumor_G2 |
| 8413 | COX5A    | 7.176972879 | Tumor_G2 |
| 8414 | COX6B1   | 8.810978679 | Tumor_G2 |
| 8415 | COX6C    | 6.451715387 | Tumor_G2 |
| 8416 | COX7A2   | 6.852112082 | Tumor_G2 |
| 8417 | COX7B    | 6.115566333 | Tumor_G2 |
| 8418 | COX8A    | 9.507707098 | Tumor_G2 |
| 8419 | SCO1     | 3.517209186 | Tumor_G2 |
| 8420 | SURF1    | 6.646780473 | Tumor_G2 |
| 8421 | ATP6V1E1 | 6.937745899 | Tumor_G2 |
| 8422 | DLAT     | 4.796177745 | Tumor_G2 |
| 8423 | PDC      | 0           | Tumor_G2 |
| 8424 | SUCLG2   | 6.096034405 | Tumor_G2 |
| 8425 | SLC25A5  | 8.265969108 | Tumor_G2 |
| 8426 | UCP2     | 8.834838935 | Tumor_G2 |
| 8427 | SOD2     | 5.247876563 | Tumor_G2 |
| 8428 | NOX4     | 3.105405673 | Tumor_G2 |
| 8429 | DUOX1    | 7.068882259 | Tumor_G2 |
| 8430 | DUOXA1   | 6.985357826 | Tumor_G2 |
| 8431 | DUOX2    | 7.772755685 | Tumor_G2 |
| 8432 | DUOXA2   | 5.446776482 | Tumor_G2 |
| 8433 | NDUFA1   | 7.730826297 | Tumor_G2 |
| 8434 | NDUFA2   | 6.232140089 | Tumor_G2 |
| 8435 | NDUFA8   | 7.068791177 | Tumor_G2 |
| 8436 | NDUFB1   | 5.44849026  | Tumor_G2 |
| 8437 | NDUFB10  | 7.481611691 | Tumor_G2 |
| 8438 | NDUFB2   | 6.061792287 | Tumor_G2 |

|      |          |             |          |
|------|----------|-------------|----------|
| 8439 | NDUFB3   | 5.909576508 | Tumor_G2 |
| 8440 | NDUFB7   | 8.599375646 | Tumor_G2 |
| 8441 | CYC1     | 6.710282549 | Tumor_G2 |
| 8442 | ETFB     | 4.5088866   | Tumor_G2 |
| 8443 | UQCR10   | 7.307226112 | Tumor_G2 |
| 8444 | UQCRQ    | 7.081958152 | Tumor_G2 |
| 8445 | UQCC3    | 4.300092832 | Tumor_G2 |
| 8446 | COX15    | 5.002793085 | Tumor_G2 |
| 8447 | COX5A    | 7.007087383 | Tumor_G2 |
| 8448 | COX6B1   | 8.522605148 | Tumor_G2 |
| 8449 | COX6C    | 6.140810661 | Tumor_G2 |
| 8450 | COX7A2   | 6.682790097 | Tumor_G2 |
| 8451 | COX7B    | 5.948709603 | Tumor_G2 |
| 8452 | COX8A    | 9.206853824 | Tumor_G2 |
| 8453 | SCO1     | 3.376761402 | Tumor_G2 |
| 8454 | SURF1    | 6.632440485 | Tumor_G2 |
| 8455 | ATP6V1E1 | 6.649553798 | Tumor_G2 |
| 8456 | DLAT     | 5.238358563 | Tumor_G2 |
| 8457 | PDC      | 0.134585944 | Tumor_G2 |
| 8458 | SUCLG2   | 5.807269886 | Tumor_G2 |
| 8459 | SLC25A5  | 7.885098271 | Tumor_G2 |
| 8460 | UCP2     | 6.647238933 | Tumor_G2 |
| 8461 | SOD2     | 4.442987541 | Tumor_G2 |
| 8462 | NOX4     | 2.484421083 | Tumor_G2 |
| 8463 | DUOX1    | 6.358216164 | Tumor_G2 |
| 8464 | DUOXA1   | 6.480830553 | Tumor_G2 |
| 8465 | DUOX2    | 6.848863707 | Tumor_G2 |
| 8466 | DUOXA2   | 4.535844507 | Tumor_G2 |
| 8467 | NDUFA1   | 7.907922476 | Tumor_G2 |
| 8468 | NDUFA2   | 6.542845828 | Tumor_G2 |
| 8469 | NDUFA8   | 6.945122159 | Tumor_G2 |
| 8470 | NDUFB1   | 5.650669771 | Tumor_G2 |
| 8471 | NDUFB10  | 7.584534701 | Tumor_G2 |
| 8472 | NDUFB2   | 6.38049206  | Tumor_G2 |
| 8473 | NDUFB3   | 6.404298166 | Tumor_G2 |
| 8474 | NDUFB7   | 8.390913192 | Tumor_G2 |
| 8475 | CYC1     | 6.814872615 | Tumor_G2 |
| 8476 | ETFB     | 5.002484823 | Tumor_G2 |
| 8477 | UQCR10   | 7.582267057 | Tumor_G2 |
| 8478 | UQCRQ    | 7.043067095 | Tumor_G2 |

|      |          |             |          |
|------|----------|-------------|----------|
| 8479 | UQCC3    | 4.213979957 | Tumor_G2 |
| 8480 | COX15    | 5.151978046 | Tumor_G2 |
| 8481 | COX5A    | 7.135013079 | Tumor_G2 |
| 8482 | COX6B1   | 8.539170009 | Tumor_G2 |
| 8483 | COX6C    | 6.477194012 | Tumor_G2 |
| 8484 | COX7A2   | 6.736140183 | Tumor_G2 |
| 8485 | COX7B    | 5.947658677 | Tumor_G2 |
| 8486 | COX8A    | 9.40735626  | Tumor_G2 |
| 8487 | SCO1     | 3.518547714 | Tumor_G2 |
| 8488 | SURF1    | 6.736980654 | Tumor_G2 |
| 8489 | ATP6V1E1 | 7.122820832 | Tumor_G2 |
| 8490 | DLAT     | 5.10858289  | Tumor_G2 |
| 8491 | PDC      | 0.05428887  | Tumor_G2 |
| 8492 | SUCLG2   | 6.602584309 | Tumor_G2 |
| 8493 | SLC25A5  | 7.787258851 | Tumor_G2 |
| 8494 | UCP2     | 8.947642892 | Tumor_G2 |
| 8495 | SOD2     | 5.34506778  | Tumor_G2 |
| 8496 | NOX4     | 1.482387388 | Tumor_G2 |
| 8497 | DUOX1    | 6.613334878 | Tumor_G2 |
| 8498 | DUOXA1   | 6.679966364 | Tumor_G2 |
| 8499 | DUOX2    | 7.673319858 | Tumor_G2 |
| 8500 | DUOXA2   | 5.607870179 | Tumor_G2 |
| 8501 | NDUFA1   | 8.381814253 | Tumor_G2 |
| 8502 | NDUFA2   | 6.9997462   | Tumor_G2 |
| 8503 | NDUFA8   | 7.595024567 | Tumor_G2 |
| 8504 | NDUFB1   | 6.289363208 | Tumor_G2 |
| 8505 | NDUFB10  | 7.551978048 | Tumor_G2 |
| 8506 | NDUFB2   | 7.099724478 | Tumor_G2 |
| 8507 | NDUFB3   | 6.705813315 | Tumor_G2 |
| 8508 | NDUFB7   | 8.532164004 | Tumor_G2 |
| 8509 | CYC1     | 6.942361772 | Tumor_G2 |
| 8510 | ETFB     | 5.335619603 | Tumor_G2 |
| 8511 | UQCR10   | 6.955596716 | Tumor_G2 |
| 8512 | UQCRQ    | 7.580348883 | Tumor_G2 |
| 8513 | UQCC3    | 4.343938404 | Tumor_G2 |
| 8514 | COX15    | 5.408623557 | Tumor_G2 |
| 8515 | COX5A    | 7.339028953 | Tumor_G2 |
| 8516 | COX6B1   | 8.864354711 | Tumor_G2 |
| 8517 | COX6C    | 6.878455658 | Tumor_G2 |
| 8518 | COX7A2   | 7.11037376  | Tumor_G2 |

|      |          |             |          |
|------|----------|-------------|----------|
| 8519 | COX7B    | 6.275124728 | Tumor_G2 |
| 8520 | COX8A    | 9.786889003 | Tumor_G2 |
| 8521 | SCO1     | 4.188921207 | Tumor_G2 |
| 8522 | SURF1    | 7.208786802 | Tumor_G2 |
| 8523 | ATP6V1E1 | 6.241569355 | Tumor_G2 |
| 8524 | DLAT     | 5.301175682 | Tumor_G2 |
| 8525 | PDC      | 0.254474458 | Tumor_G2 |
| 8526 | SUCLG2   | 6.608952644 | Tumor_G2 |
| 8527 | SLC25A5  | 8.321512028 | Tumor_G2 |
| 8528 | UCP2     | 8.115346413 | Tumor_G2 |
| 8529 | SOD2     | 4.350087228 | Tumor_G2 |
| 8530 | NOX4     | 2.316982465 | Tumor_G2 |
| 8531 | DUOX1    | 7.513693731 | Tumor_G2 |
| 8532 | DUOXA1   | 7.28432022  | Tumor_G2 |
| 8533 | DUOX2    | 9.469746214 | Tumor_G2 |
| 8534 | DUOXA2   | 7.242563155 | Tumor_G2 |
| 8535 | NDUFA1   | 8.529348207 | Tumor_G2 |
| 8536 | NDUFA2   | 7.09489065  | Tumor_G2 |
| 8537 | NDUFA8   | 7.469586124 | Tumor_G2 |
| 8538 | NDUFB1   | 6.28268531  | Tumor_G2 |
| 8539 | NDUFB10  | 7.939232634 | Tumor_G2 |
| 8540 | NDUFB2   | 7.079248408 | Tumor_G2 |
| 8541 | NDUFB3   | 6.885649266 | Tumor_G2 |
| 8542 | NDUFB7   | 9.053160643 | Tumor_G2 |
| 8543 | CYC1     | 7.156047493 | Tumor_G2 |
| 8544 | ETFB     | 5.596640649 | Tumor_G2 |
| 8545 | UQCR10   | 8.101013422 | Tumor_G2 |
| 8546 | UQCRQ    | 7.709222975 | Tumor_G2 |
| 8547 | UQCC3    | 4.785565805 | Tumor_G2 |
| 8548 | COX15    | 5.249343519 | Tumor_G2 |
| 8549 | COX5A    | 7.476344033 | Tumor_G2 |
| 8550 | COX6B1   | 9.012322877 | Tumor_G2 |
| 8551 | COX6C    | 6.734330167 | Tumor_G2 |
| 8552 | COX7A2   | 7.380834219 | Tumor_G2 |
| 8553 | COX7B    | 6.619128382 | Tumor_G2 |
| 8554 | COX8A    | 9.931130902 | Tumor_G2 |
| 8555 | SCO1     | 3.474021888 | Tumor_G2 |
| 8556 | SURF1    | 7.05939625  | Tumor_G2 |
| 8557 | ATP6V1E1 | 7.039637429 | Tumor_G2 |
| 8558 | DLAT     | 5.362444456 | Tumor_G2 |

|      |          |             |          |
|------|----------|-------------|----------|
| 8559 | PDC      | 0           | Tumor_G2 |
| 8560 | SUCLG2   | 6.440632026 | Tumor_G2 |
| 8561 | SLC25A5  | 8.293543788 | Tumor_G2 |
| 8562 | UCP2     | 9.356762867 | Tumor_G2 |
| 8563 | SOD2     | 4.555547465 | Tumor_G2 |
| 8564 | NOX4     | 1.65611724  | Tumor_G2 |
| 8565 | DUOX1    | 7.203135863 | Tumor_G2 |
| 8566 | DUOXA1   | 7.167837525 | Tumor_G2 |
| 8567 | DUOX2    | 8.413063815 | Tumor_G2 |
| 8568 | DUOXA2   | 6.769502645 | Tumor_G2 |
| 8569 | NDUFA1   | 8.25054312  | Tumor_G2 |
| 8570 | NDUFA2   | 6.748960505 | Tumor_G2 |
| 8571 | NDUFA8   | 7.117991924 | Tumor_G2 |
| 8572 | NDUFB1   | 5.845190518 | Tumor_G2 |
| 8573 | NDUFB10  | 7.683748613 | Tumor_G2 |
| 8574 | NDUFB2   | 6.769830974 | Tumor_G2 |
| 8575 | NDUFB3   | 6.483607144 | Tumor_G2 |
| 8576 | NDUFB7   | 8.621882871 | Tumor_G2 |
| 8577 | CYC1     | 6.834716064 | Tumor_G2 |
| 8578 | ETFB     | 5.149577336 | Tumor_G2 |
| 8579 | UQCR10   | 7.688698191 | Tumor_G2 |
| 8580 | UQCRQ    | 7.398167621 | Tumor_G2 |
| 8581 | UQCC3    | 4.205653885 | Tumor_G2 |
| 8582 | COX15    | 4.808247928 | Tumor_G2 |
| 8583 | COX5A    | 7.490839751 | Tumor_G2 |
| 8584 | COX6B1   | 8.787783798 | Tumor_G2 |
| 8585 | COX6C    | 6.691961651 | Tumor_G2 |
| 8586 | COX7A2   | 6.929377896 | Tumor_G2 |
| 8587 | COX7B    | 6.221369364 | Tumor_G2 |
| 8588 | COX8A    | 9.607265024 | Tumor_G2 |
| 8589 | SCO1     | 3.302388173 | Tumor_G2 |
| 8590 | SURF1    | 6.319799577 | Tumor_G2 |
| 8591 | ATP6V1E1 | 7.206891564 | Tumor_G2 |
| 8592 | DLAT     | 5.184099458 | Tumor_G2 |
| 8593 | PDC      | 0.34253438  | Tumor_G2 |
| 8594 | SUCLG2   | 6.301527565 | Tumor_G2 |
| 8595 | SLC25A5  | 8.468081018 | Tumor_G2 |
| 8596 | UCP2     | 8.686880842 | Tumor_G2 |
| 8597 | SOD2     | 5.244616392 | Tumor_G2 |
| 8598 | NOX4     | 1.58206439  | Tumor_G2 |

|      |          |             |          |
|------|----------|-------------|----------|
| 8599 | DUOX1    | 6.487874355 | Tumor_G2 |
| 8600 | DUOXA1   | 6.359528146 | Tumor_G2 |
| 8601 | DUOX2    | 6.253843515 | Tumor_G2 |
| 8602 | DUOXA2   | 4.557635949 | Tumor_G2 |
| 8603 | NDUFA1   | 8.609465962 | Tumor_G2 |
| 8604 | NDUFA2   | 7.014895992 | Tumor_G2 |
| 8605 | NDUFA8   | 7.459287577 | Tumor_G2 |
| 8606 | NDUFB1   | 6.186199105 | Tumor_G2 |
| 8607 | NDUFB10  | 7.863361567 | Tumor_G2 |
| 8608 | NDUFB2   | 6.521836641 | Tumor_G2 |
| 8609 | NDUFB3   | 6.532116443 | Tumor_G2 |
| 8610 | NDUFB7   | 8.920613084 | Tumor_G2 |
| 8611 | CYC1     | 6.923190352 | Tumor_G2 |
| 8612 | ETFB     | 5.230968894 | Tumor_G2 |
| 8613 | UQCR10   | 8.09117446  | Tumor_G2 |
| 8614 | UQCRQ    | 7.615745026 | Tumor_G2 |
| 8615 | UQCC3    | 4.669130203 | Tumor_G2 |
| 8616 | COX15    | 4.786170072 | Tumor_G2 |
| 8617 | COX5A    | 7.462307965 | Tumor_G2 |
| 8618 | COX6B1   | 9.237943537 | Tumor_G2 |
| 8619 | COX6C    | 7.082704271 | Tumor_G2 |
| 8620 | COX7A2   | 7.122041431 | Tumor_G2 |
| 8621 | COX7B    | 6.384507712 | Tumor_G2 |
| 8622 | COX8A    | 9.460061061 | Tumor_G2 |
| 8623 | SCO1     | 3.194665879 | Tumor_G2 |
| 8624 | SURF1    | 6.652385434 | Tumor_G2 |
| 8625 | ATP6V1E1 | 7.018639361 | Tumor_G2 |
| 8626 | DLAT     | 4.816206053 | Tumor_G2 |
| 8627 | PDC      | 0           | Tumor_G2 |
| 8628 | SUCLG2   | 5.997571851 | Tumor_G2 |
| 8629 | SLC25A5  | 7.900979692 | Tumor_G2 |
| 8630 | UCP2     | 10.01325251 | Tumor_G2 |
| 8631 | SOD2     | 4.875280499 | Tumor_G2 |
| 8632 | NOX4     | 2.133204379 | Tumor_G2 |
| 8633 | DUOX1    | 6.654509183 | Tumor_G2 |
| 8634 | DUOXA1   | 6.87994748  | Tumor_G2 |
| 8635 | DUOX2    | 7.861921623 | Tumor_G2 |
| 8636 | DUOXA2   | 6.063177027 | Tumor_G2 |
| 8637 | NDUFA1   | 7.74286597  | Tumor_G2 |
| 8638 | NDUFA2   | 6.493806306 | Tumor_G2 |



|      |          |             |          |
|------|----------|-------------|----------|
| 8639 | NDUFA8   | 6.940127881 | Tumor_G2 |
| 8640 | NDUFB1   | 5.763467877 | Tumor_G2 |
| 8641 | NDUFB10  | 7.471215513 | Tumor_G2 |
| 8642 | NDUFB2   | 6.616202856 | Tumor_G2 |
| 8643 | NDUFB3   | 6.116121148 | Tumor_G2 |
| 8644 | NDUFB7   | 8.560514279 | Tumor_G2 |
| 8645 | CYC1     | 6.985182727 | Tumor_G2 |
| 8646 | ETFB     | 4.737097804 | Tumor_G2 |
| 8647 | UQCR10   | 7.489474963 | Tumor_G2 |
| 8648 | UQCRQ    | 7.140381213 | Tumor_G2 |
| 8649 | UQCC3    | 4.205898522 | Tumor_G2 |
| 8650 | COX15    | 4.821141039 | Tumor_G2 |
| 8651 | COX5A    | 7.251987048 | Tumor_G2 |
| 8652 | COX6B1   | 8.482586833 | Tumor_G2 |
| 8653 | COX6C    | 6.460312    | Tumor_G2 |
| 8654 | COX7A2   | 6.645329089 | Tumor_G2 |
| 8655 | COX7B    | 5.874403497 | Tumor_G2 |
| 8656 | COX8A    | 9.261992817 | Tumor_G2 |
| 8657 | SCO1     | 3.285188637 | Tumor_G2 |
| 8658 | SURF1    | 6.35386536  | Tumor_G2 |
| 8659 | ATP6V1E1 | 7.107847647 | Tumor_G2 |
| 8660 | DLAT     | 5.102325738 | Tumor_G2 |
| 8661 | PDC      | 0           | Tumor_G2 |
| 8662 | SUCLG2   | 6.469001103 | Tumor_G2 |
| 8663 | SLC25A5  | 8.358678578 | Tumor_G2 |
| 8664 | UCP2     | 7.59855686  | Tumor_G2 |
| 8665 | SOD2     | 4.771157445 | Tumor_G2 |
| 8666 | NOX4     | 1.557900378 | Tumor_G2 |
| 8667 | DUOX1    | 6.037517684 | Tumor_G2 |
| 8668 | DUOXA1   | 6.14998738  | Tumor_G2 |
| 8669 | DUOX2    | 5.94913879  | Tumor_G2 |
| 8670 | DUOXA2   | 4.006557349 | Tumor_G2 |
| 8671 | NDUFA1   | 8.400800436 | Tumor_G2 |
| 8672 | NDUFA2   | 7.116498353 | Tumor_G2 |
| 8673 | NDUFA8   | 7.466020808 | Tumor_G2 |
| 8674 | NDUFB1   | 6.186305374 | Tumor_G2 |
| 8675 | NDUFB10  | 7.742541357 | Tumor_G2 |
| 8676 | NDUFB2   | 6.88284948  | Tumor_G2 |
| 8677 | NDUFB3   | 6.479703196 | Tumor_G2 |
| 8678 | NDUFB7   | 9.011103374 | Tumor_G2 |

|      |          |             |          |
|------|----------|-------------|----------|
| 8679 | CYC1     | 7.027184036 | Tumor_G2 |
| 8680 | ETFB     | 5.690104437 | Tumor_G2 |
| 8681 | UQCR10   | 7.149140651 | Tumor_G2 |
| 8682 | UQCRQ    | 7.54322854  | Tumor_G2 |
| 8683 | UQCC3    | 5.201647814 | Tumor_G2 |
| 8684 | COX15    | 4.837619836 | Tumor_G2 |
| 8685 | COX5A    | 7.182444961 | Tumor_G2 |
| 8686 | COX6B1   | 9.017255076 | Tumor_G2 |
| 8687 | COX6C    | 6.75851421  | Tumor_G2 |
| 8688 | COX7A2   | 7.143002601 | Tumor_G2 |
| 8689 | COX7B    | 6.250865456 | Tumor_G2 |
| 8690 | COX8A    | 9.944886184 | Tumor_G2 |
| 8691 | SCO1     | 2.814161522 | Tumor_G2 |
| 8692 | SURF1    | 6.987483676 | Tumor_G2 |
| 8693 | ATP6V1E1 | 6.846495408 | Tumor_G2 |
| 8694 | DLAT     | 4.92111732  | Tumor_G2 |
| 8695 | PDC      | 0.119875591 | Tumor_G2 |
| 8696 | SUCLG2   | 6.193733769 | Tumor_G2 |
| 8697 | SLC25A5  | 7.507325581 | Tumor_G2 |
| 8698 | UCP2     | 8.531605211 | Tumor_G2 |
| 8699 | SOD2     | 4.190357704 | Tumor_G2 |
| 8700 | NOX4     | 1.995612903 | Tumor_G2 |
| 8701 | DUOX1    | 7.105471383 | Tumor_G2 |
| 8702 | DUOXA1   | 6.79819808  | Tumor_G2 |
| 8703 | DUOX2    | 8.045125744 | Tumor_G2 |
| 8704 | DUOXA2   | 6.851350451 | Tumor_G2 |
| 8705 | NDUFA1   | 8.094014644 | Tumor_G2 |
| 8706 | NDUFA2   | 6.999856317 | Tumor_G2 |
| 8707 | NDUFA8   | 7.058680876 | Tumor_G2 |
| 8708 | NDUFB1   | 5.721037977 | Tumor_G2 |
| 8709 | NDUFB10  | 7.607196256 | Tumor_G2 |
| 8710 | NDUFB2   | 7.032369485 | Tumor_G2 |
| 8711 | NDUFB3   | 6.156763512 | Tumor_G2 |
| 8712 | NDUFB7   | 8.853419825 | Tumor_G2 |
| 8713 | CYC1     | 6.95840388  | Tumor_G2 |
| 8714 | ETFB     | 5.490880759 | Tumor_G2 |
| 8715 | UQCR10   | 7.929814343 | Tumor_G2 |
| 8716 | UQCRQ    | 7.463026756 | Tumor_G2 |
| 8717 | UQCC3    | 4.433119575 | Tumor_G2 |
| 8718 | COX15    | 4.323201638 | Tumor_G2 |

|      |          |             |          |
|------|----------|-------------|----------|
| 8719 | COX5A    | 7.019695911 | Tumor_G2 |
| 8720 | COX6B1   | 9.096564108 | Tumor_G2 |
| 8721 | COX6C    | 6.530343093 | Tumor_G2 |
| 8722 | COX7A2   | 7.038593417 | Tumor_G2 |
| 8723 | COX7B    | 6.00558936  | Tumor_G2 |
| 8724 | COX8A    | 9.269138949 | Tumor_G2 |
| 8725 | SCO1     | 2.744391975 | Tumor_G2 |
| 8726 | SURF1    | 6.200133043 | Tumor_G2 |
| 8727 | ATP6V1E1 | 7.126048504 | Tumor_G2 |
| 8728 | DLAT     | 4.15497442  | Tumor_G2 |
| 8729 | PDC      | 0           | Tumor_G2 |
| 8730 | SUCLG2   | 5.7691991   | Tumor_G2 |
| 8731 | SLC25A5  | 8.0913033   | Tumor_G2 |
| 8732 | UCP2     | 8.09977305  | Tumor_G2 |
| 8733 | SOD2     | 3.998871149 | Tumor_G2 |
| 8734 | NOX4     | 2.160959643 | Tumor_G2 |
| 8735 | DUOX1    | 5.905711113 | Tumor_G2 |
| 8736 | DUOXA1   | 6.132180565 | Tumor_G2 |
| 8737 | DUOX2    | 5.849344343 | Tumor_G2 |
| 8738 | DUOXA2   | 4.241785065 | Tumor_G2 |
| 8739 | NDUFA1   | 8.293370336 | Tumor_G2 |
| 8740 | NDUFA2   | 6.908637457 | Tumor_G2 |
| 8741 | NDUFA8   | 7.119684124 | Tumor_G2 |
| 8742 | NDUFB1   | 5.915877967 | Tumor_G2 |
| 8743 | NDUFB10  | 7.445144605 | Tumor_G2 |
| 8744 | NDUFB2   | 7.017073771 | Tumor_G2 |
| 8745 | NDUFB3   | 6.600831175 | Tumor_G2 |
| 8746 | NDUFB7   | 8.793194321 | Tumor_G2 |
| 8747 | CYC1     | 6.982913046 | Tumor_G2 |
| 8748 | ETFB     | 5.043307647 | Tumor_G2 |
| 8749 | UQCR10   | 7.789441872 | Tumor_G2 |
| 8750 | UQCRQ    | 7.283963526 | Tumor_G2 |
| 8751 | UQCC3    | 4.373957828 | Tumor_G2 |
| 8752 | COX15    | 4.760039963 | Tumor_G2 |
| 8753 | COX5A    | 7.144118114 | Tumor_G2 |
| 8754 | COX6B1   | 8.856410325 | Tumor_G2 |
| 8755 | COX6C    | 6.601344963 | Tumor_G2 |
| 8756 | COX7A2   | 7.019396672 | Tumor_G2 |
| 8757 | COX7B    | 6.350854946 | Tumor_G2 |
| 8758 | COX8A    | 9.590898433 | Tumor_G2 |

|      |          |             |          |
|------|----------|-------------|----------|
| 8759 | SCO1     | 3.320701226 | Tumor_G2 |
| 8760 | SURF1    | 6.021970364 | Tumor_G2 |
| 8761 | ATP6V1E1 | 7.148641723 | Tumor_G2 |
| 8762 | DLAT     | 5.026819666 | Tumor_G2 |
| 8763 | PDC      | 0.119663923 | Tumor_G2 |
| 8764 | SUCLG2   | 6.017547004 | Tumor_G2 |
| 8765 | SLC25A5  | 8.210728955 | Tumor_G2 |
| 8766 | UCP2     | 8.156057073 | Tumor_G2 |
| 8767 | SOD2     | 4.826009386 | Tumor_G2 |
| 8768 | NOX4     | 1.523191951 | Tumor_G2 |
| 8769 | DUOX1    | 6.528407463 | Tumor_G2 |
| 8770 | DUOXA1   | 6.597229337 | Tumor_G2 |
| 8771 | DUOX2    | 6.318402518 | Tumor_G2 |
| 8772 | DUOXA2   | 4.722775488 | Tumor_G2 |
| 8773 | NDUFA1   | 8.71185314  | Tumor_G2 |
| 8774 | NDUFA2   | 7.093727523 | Tumor_G2 |
| 8775 | NDUFA8   | 7.425472627 | Tumor_G2 |
| 8776 | NDUFB1   | 6.056001118 | Tumor_G2 |
| 8777 | NDUFB10  | 7.660173306 | Tumor_G2 |
| 8778 | NDUFB2   | 7.113240608 | Tumor_G2 |
| 8779 | NDUFB3   | 6.838761093 | Tumor_G2 |
| 8780 | NDUFB7   | 9.001582833 | Tumor_G2 |
| 8781 | CYC1     | 7.311868612 | Tumor_G2 |
| 8782 | ETFB     | 5.21200579  | Tumor_G2 |
| 8783 | UQCR10   | 7.955500064 | Tumor_G2 |
| 8784 | UQCRQ    | 7.408887179 | Tumor_G2 |
| 8785 | UQCC3    | 4.838335785 | Tumor_G2 |
| 8786 | COX15    | 5.399001882 | Tumor_G2 |
| 8787 | COX5A    | 7.435605473 | Tumor_G2 |
| 8788 | COX6B1   | 8.873859222 | Tumor_G2 |
| 8789 | COX6C    | 6.945688081 | Tumor_G2 |
| 8790 | COX7A2   | 7.188913074 | Tumor_G2 |
| 8791 | COX7B    | 6.564253921 | Tumor_G2 |
| 8792 | COX8A    | 10.18472219 | Tumor_G2 |
| 8793 | SCO1     | 3.742340898 | Tumor_G2 |
| 8794 | SURF1    | 6.457308984 | Tumor_G2 |
| 8795 | ATP6V1E1 | 6.650694318 | Tumor_G2 |
| 8796 | DLAT     | 5.227204346 | Tumor_G2 |
| 8797 | PDC      | 0.439857739 | Tumor_G2 |
| 8798 | SUCLG2   | 6.37786816  | Tumor_G2 |

|      |          |             |          |
|------|----------|-------------|----------|
| 8799 | SLC25A5  | 8.102004744 | Tumor_G2 |
| 8800 | UCP2     | 6.092853152 | Tumor_G2 |
| 8801 | SOD2     | 4.780398927 | Tumor_G2 |
| 8802 | NOX4     | 1.040572641 | Tumor_G2 |
| 8803 | DUOX1    | 6.968310064 | Tumor_G2 |
| 8804 | DUOXA1   | 6.664299195 | Tumor_G2 |
| 8805 | DUOX2    | 7.175652481 | Tumor_G2 |
| 8806 | DUOXA2   | 6.229690894 | Tumor_G2 |
| 8807 | NDUFA1   | 8.274742882 | Tumor_G2 |
| 8808 | NDUFA2   | 7.186443239 | Tumor_G2 |
| 8809 | NDUFA8   | 7.150781872 | Tumor_G2 |
| 8810 | NDUFB1   | 5.954968759 | Tumor_G2 |
| 8811 | NDUFB10  | 7.628460315 | Tumor_G2 |
| 8812 | NDUFB2   | 7.122571878 | Tumor_G2 |
| 8813 | NDUFB3   | 6.751052941 | Tumor_G2 |
| 8814 | NDUFB7   | 8.675154713 | Tumor_G2 |
| 8815 | CYC1     | 7.353588105 | Tumor_G2 |
| 8816 | ETFB     | 5.171048325 | Tumor_G2 |
| 8817 | UQCR10   | 8.202434013 | Tumor_G2 |
| 8818 | UQCRQ    | 7.863343858 | Tumor_G2 |
| 8819 | UQCC3    | 4.670085634 | Tumor_G2 |
| 8820 | COX15    | 4.588358296 | Tumor_G2 |
| 8821 | COX5A    | 7.691351578 | Tumor_G2 |
| 8822 | COX6B1   | 8.92567918  | Tumor_G2 |
| 8823 | COX6C    | 6.621408299 | Tumor_G2 |
| 8824 | COX7A2   | 7.255706355 | Tumor_G2 |
| 8825 | COX7B    | 6.47000459  | Tumor_G2 |
| 8826 | COX8A    | 10.01346547 | Tumor_G2 |
| 8827 | SCO1     | 3.274499869 | Tumor_G2 |
| 8828 | SURF1    | 6.277787093 | Tumor_G2 |
| 8829 | ATP6V1E1 | 7.738213513 | Tumor_G2 |
| 8830 | DLAT     | 5.243746752 | Tumor_G2 |
| 8831 | PDC      | 0.251646627 | Tumor_G2 |
| 8832 | SUCLG2   | 6.473515165 | Tumor_G2 |
| 8833 | SLC25A5  | 8.25892072  | Tumor_G2 |
| 8834 | UCP2     | 8.200246039 | Tumor_G2 |
| 8835 | SOD2     | 4.576190282 | Tumor_G2 |
| 8836 | NOX4     | 1.457373402 | Tumor_G2 |
| 8837 | DUOX1    | 6.209296351 | Tumor_G2 |
| 8838 | DUOXA1   | 6.275761082 | Tumor_G2 |

|      |          |             |          |
|------|----------|-------------|----------|
| 8839 | DUOX2    | 5.293537134 | Tumor_G2 |
| 8840 | DUOXA2   | 3.873709413 | Tumor_G2 |
| 8841 | NDUFA1   | 8.373515863 | Tumor_G2 |
| 8842 | NDUFA2   | 7.029838112 | Tumor_G2 |
| 8843 | NDUFA8   | 7.481405883 | Tumor_G2 |
| 8844 | NDUFB1   | 6.273757191 | Tumor_G2 |
| 8845 | NDUFB10  | 7.772861376 | Tumor_G2 |
| 8846 | NDUFB2   | 7.145191527 | Tumor_G2 |
| 8847 | NDUFB3   | 6.89266756  | Tumor_G2 |
| 8848 | NDUFB7   | 8.870659397 | Tumor_G2 |
| 8849 | CYC1     | 7.216092523 | Tumor_G2 |
| 8850 | ETFB     | 5.317363124 | Tumor_G2 |
| 8851 | UQCR10   | 7.804833251 | Tumor_G2 |
| 8852 | UQCRQ    | 7.509018918 | Tumor_G2 |
| 8853 | UQCC3    | 4.695924748 | Tumor_G2 |
| 8854 | COX15    | 5.216824288 | Tumor_G2 |
| 8855 | COX5A    | 7.384069246 | Tumor_G2 |
| 8856 | COX6B1   | 8.973740516 | Tumor_G2 |
| 8857 | COX6C    | 6.732740775 | Tumor_G2 |
| 8858 | COX7A2   | 7.276166109 | Tumor_G2 |
| 8859 | COX7B    | 6.538001858 | Tumor_G2 |
| 8860 | COX8A    | 9.668241997 | Tumor_G2 |
| 8861 | SCO1     | 3.735662948 | Tumor_G2 |
| 8862 | SURF1    | 6.809288689 | Tumor_G2 |
| 8863 | ATP6V1E1 | 7.12240565  | Tumor_G2 |
| 8864 | DLAT     | 5.180475063 | Tumor_G2 |
| 8865 | PDC      | 0.157450628 | Tumor_G2 |
| 8866 | SUCLG2   | 6.580333225 | Tumor_G2 |
| 8867 | SLC25A5  | 8.65931413  | Tumor_G2 |
| 8868 | UCP2     | 7.56529739  | Tumor_G2 |
| 8869 | SOD2     | 5.000389938 | Tumor_G2 |
| 8870 | NOX4     | 1.848178726 | Tumor_G2 |
| 8871 | DUOX1    | 6.963098457 | Tumor_G2 |
| 8872 | DUOXA1   | 6.859686709 | Tumor_G2 |
| 8873 | DUOX2    | 7.060105081 | Tumor_G2 |
| 8874 | DUOXA2   | 5.676342884 | Tumor_G2 |
| 8875 | NDUFA1   | 8.26951815  | Tumor_G2 |
| 8876 | NDUFA2   | 7.083108426 | Tumor_G2 |
| 8877 | NDUFA8   | 7.127459724 | Tumor_G2 |
| 8878 | NDUFB1   | 6.371491005 | Tumor_G2 |

|      |          |             |          |
|------|----------|-------------|----------|
| 8879 | NDUFB10  | 7.768000439 | Tumor_G2 |
| 8880 | NDUFB2   | 6.296017038 | Tumor_G2 |
| 8881 | NDUFB3   | 5.529467544 | Tumor_G2 |
| 8882 | NDUFB7   | 8.985811898 | Tumor_G2 |
| 8883 | CYC1     | 6.524636863 | Tumor_G2 |
| 8884 | ETFB     | 4.682126693 | Tumor_G2 |
| 8885 | UQCR10   | 7.814481822 | Tumor_G2 |
| 8886 | UQCRQ    | 7.363023487 | Tumor_G2 |
| 8887 | UQCC3    | 4.663987473 | Tumor_G2 |
| 8888 | COX15    | 4.385898736 | Tumor_G2 |
| 8889 | COX5A    | 7.11703487  | Tumor_G2 |
| 8890 | COX6B1   | 9.176136331 | Tumor_G2 |
| 8891 | COX6C    | 6.778793213 | Tumor_G2 |
| 8892 | COX7A2   | 6.738389538 | Tumor_G2 |
| 8893 | COX7B    | 6.012114884 | Tumor_G2 |
| 8894 | COX8A    | 9.588116647 | Tumor_G2 |
| 8895 | SCO1     | 2.653635732 | Tumor_G2 |
| 8896 | SURF1    | 6.765128141 | Tumor_G2 |
| 8897 | ATP6V1E1 | 6.409923252 | Tumor_G2 |
| 8898 | DLAT     | 3.778534721 | Tumor_G2 |
| 8899 | PDC      | 0           | Tumor_G2 |
| 8900 | SUCLG2   | 5.324261973 | Tumor_G2 |
| 8901 | SLC25A5  | 6.853977484 | Tumor_G2 |
| 8902 | UCP2     | 8.102192814 | Tumor_G2 |
| 8903 | SOD2     | 3.797583175 | Tumor_G2 |
| 8904 | NOX4     | 1.792661543 | Tumor_G2 |
| 8905 | DUOX1    | 5.824035713 | Tumor_G2 |
| 8906 | DUOXA1   | 6.329223502 | Tumor_G2 |
| 8907 | DUOX2    | 6.129640971 | Tumor_G2 |
| 8908 | DUOXA2   | 4.962975948 | Tumor_G2 |
| 8909 | NDUFA1   | 8.401227026 | Tumor_G2 |
| 8910 | NDUFA2   | 7.270197966 | Tumor_G2 |
| 8911 | NDUFA8   | 7.409204609 | Tumor_G2 |
| 8912 | NDUFB1   | 6.33337496  | Tumor_G2 |
| 8913 | NDUFB10  | 7.919950909 | Tumor_G2 |
| 8914 | NDUFB2   | 6.933501353 | Tumor_G2 |
| 8915 | NDUFB3   | 6.075902875 | Tumor_G2 |
| 8916 | NDUFB7   | 9.736002294 | Tumor_G2 |
| 8917 | CYC1     | 6.863612559 | Tumor_G2 |
| 8918 | ETFB     | 5.84056182  | Tumor_G2 |

|      |          |             |          |
|------|----------|-------------|----------|
| 8919 | UQCR10   | 7.990754303 | Tumor_G2 |
| 8920 | UQCRQ    | 8.035273442 | Tumor_G2 |
| 8921 | UQCC3    | 5.146319136 | Tumor_G2 |
| 8922 | COX15    | 4.101108855 | Tumor_G2 |
| 8923 | COX5A    | 7.001127651 | Tumor_G2 |
| 8924 | COX6B1   | 9.224105725 | Tumor_G2 |
| 8925 | COX6C    | 6.681820008 | Tumor_G2 |
| 8926 | COX7A2   | 6.826983581 | Tumor_G2 |
| 8927 | COX7B    | 6.152998034 | Tumor_G2 |
| 8928 | COX8A    | 9.867078119 | Tumor_G2 |
| 8929 | SCO1     | 2.547188398 | Tumor_G2 |
| 8930 | SURF1    | 6.475998652 | Tumor_G2 |
| 8931 | ATP6V1E1 | 6.328710498 | Tumor_G2 |
| 8932 | DLAT     | 3.559170249 | Tumor_G2 |
| 8933 | PDC      | 0.096602658 | Tumor_G2 |
| 8934 | SUCLG2   | 5.051812387 | Tumor_G2 |
| 8935 | SLC25A5  | 6.572615827 | Tumor_G2 |
| 8936 | UCP2     | 8.145156677 | Tumor_G2 |
| 8937 | SOD2     | 3.063202049 | Tumor_G2 |
| 8938 | NOX4     | 1.113485896 | Tumor_G2 |
| 8939 | DUOX1    | 7.589125169 | Tumor_G2 |
| 8940 | DUOXA1   | 7.213514565 | Tumor_G2 |
| 8941 | DUOX2    | 8.141539165 | Tumor_G2 |
| 8942 | DUOXA2   | 7.050303787 | Tumor_G2 |
| 8943 | NDUFA1   | 8.000643742 | Tumor_G2 |
| 8944 | NDUFA2   | 6.584417597 | Tumor_G2 |
| 8945 | NDUFA8   | 6.863150533 | Tumor_G2 |
| 8946 | NDUFB1   | 5.652595286 | Tumor_G2 |
| 8947 | NDUFB10  | 7.235957382 | Tumor_G2 |
| 8948 | NDUFB2   | 6.265397826 | Tumor_G2 |
| 8949 | NDUFB3   | 6.305989426 | Tumor_G2 |
| 8950 | NDUFB7   | 8.415443092 | Tumor_G2 |
| 8951 | CYC1     | 6.894101583 | Tumor_G2 |
| 8952 | ETFB     | 4.779109904 | Tumor_G2 |
| 8953 | UQCR10   | 7.541852388 | Tumor_G2 |
| 8954 | UQCRQ    | 7.192581581 | Tumor_G2 |
| 8955 | UQCC3    | 4.245384259 | Tumor_G2 |
| 8956 | COX15    | 4.724126616 | Tumor_G2 |
| 8957 | COX5A    | 6.796800533 | Tumor_G2 |
| 8958 | COX6B1   | 8.475780487 | Tumor_G2 |



|      |          |             |          |
|------|----------|-------------|----------|
| 8959 | COX6C    | 6.381511607 | Tumor_G2 |
| 8960 | COX7A2   | 6.737742645 | Tumor_G2 |
| 8961 | COX7B    | 6.114880819 | Tumor_G2 |
| 8962 | COX8A    | 9.319250779 | Tumor_G2 |
| 8963 | SCO1     | 3.253879376 | Tumor_G2 |
| 8964 | SURF1    | 6.108395652 | Tumor_G2 |
| 8965 | ATP6V1E1 | 6.501470994 | Tumor_G2 |
| 8966 | DLAT     | 4.735889058 | Tumor_G2 |
| 8967 | PDC      | 0.057098749 | Tumor_G2 |
| 8968 | SUCLG2   | 5.725825657 | Tumor_G2 |
| 8969 | SLC25A5  | 7.890147883 | Tumor_G2 |
| 8970 | UCP2     | 7.542271225 | Tumor_G2 |
| 8971 | SOD2     | 5.389945625 | Tumor_G2 |
| 8972 | NOX4     | 1.53047872  | Tumor_G2 |
| 8973 | DUOX1    | 7.536895589 | Tumor_G2 |
| 8974 | DUOXA1   | 7.504451598 | Tumor_G2 |
| 8975 | DUOX2    | 7.802224557 | Tumor_G2 |
| 8976 | DUOXA2   | 5.717050532 | Tumor_G2 |
| 8977 | NDUFA1   | 7.58694453  | Tumor_G2 |
| 8978 | NDUFA2   | 6.58669265  | Tumor_G2 |
| 8979 | NDUFA8   | 7.176928457 | Tumor_G2 |
| 8980 | NDUFB1   | 5.445196513 | Tumor_G2 |
| 8981 | NDUFB10  | 7.352910862 | Tumor_G2 |
| 8982 | NDUFB2   | 6.48436461  | Tumor_G2 |
| 8983 | NDUFB3   | 6.009342255 | Tumor_G2 |
| 8984 | NDUFB7   | 8.661931689 | Tumor_G2 |
| 8985 | CYC1     | 6.700026569 | Tumor_G2 |
| 8986 | ETFB     | 5.263001561 | Tumor_G2 |
| 8987 | UQCR10   | 6.791544757 | Tumor_G2 |
| 8988 | UQCRQ    | 7.131088326 | Tumor_G2 |
| 8989 | UQCC3    | 4.484095144 | Tumor_G2 |
| 8990 | COX15    | 4.879319319 | Tumor_G2 |
| 8991 | COX5A    | 6.937973717 | Tumor_G2 |
| 8992 | COX6B1   | 8.632776193 | Tumor_G2 |
| 8993 | COX6C    | 6.273475604 | Tumor_G2 |
| 8994 | COX7A2   | 6.778126487 | Tumor_G2 |
| 8995 | COX7B    | 6.028454848 | Tumor_G2 |
| 8996 | COX8A    | 9.453902457 | Tumor_G2 |
| 8997 | SCO1     | 3.503715362 | Tumor_G2 |
| 8998 | SURF1    | 6.645404877 | Tumor_G2 |

|      |          |             |          |
|------|----------|-------------|----------|
| 8999 | ATP6V1E1 | 6.378963738 | Tumor_G2 |
| 9000 | DLAT     | 5.261852955 | Tumor_G2 |
| 9001 | PDC      | 0.267427461 | Tumor_G2 |
| 9002 | SUCLG2   | 6.08992233  | Tumor_G2 |
| 9003 | SLC25A5  | 8.217484653 | Tumor_G2 |
| 9004 | UCP2     | 9.050347481 | Tumor_G2 |
| 9005 | SOD2     | 4.972590608 | Tumor_G2 |
| 9006 | NOX4     | 2.80619918  | Tumor_G2 |
| 9007 | DUOX1    | 7.861396687 | Tumor_G2 |
| 9008 | DUOXA1   | 7.879018679 | Tumor_G2 |
| 9009 | DUOX2    | 9.362387161 | Tumor_G2 |
| 9010 | DUOXA2   | 6.7002081   | Tumor_G2 |
| 9011 | NDUFA1   | 7.751515953 | Tumor_G2 |
| 9012 | NDUFA2   | 6.558936273 | Tumor_G2 |
| 9013 | NDUFA8   | 7.052954645 | Tumor_G2 |
| 9014 | NDUFB1   | 5.459408256 | Tumor_G2 |
| 9015 | NDUFB10  | 7.582230014 | Tumor_G2 |
| 9016 | NDUFB2   | 5.94687777  | Tumor_G2 |
| 9017 | NDUFB3   | 6.05436755  | Tumor_G2 |
| 9018 | NDUFB7   | 8.135180469 | Tumor_G2 |
| 9019 | CYC1     | 6.628093737 | Tumor_G2 |
| 9020 | ETFB     | 4.765186673 | Tumor_G2 |
| 9021 | UQCR10   | 7.441724468 | Tumor_G2 |
| 9022 | UQCRQ    | 6.851644767 | Tumor_G2 |
| 9023 | UQCC3    | 4.380463499 | Tumor_G2 |
| 9024 | COX15    | 5.278329827 | Tumor_G2 |
| 9025 | COX5A    | 6.759735197 | Tumor_G2 |
| 9026 | COX6B1   | 8.506808251 | Tumor_G2 |
| 9027 | COX6C    | 6.265840627 | Tumor_G2 |
| 9028 | COX7A2   | 6.738649836 | Tumor_G2 |
| 9029 | COX7B    | 5.851020092 | Tumor_G2 |
| 9030 | COX8A    | 9.234371646 | Tumor_G2 |
| 9031 | SCO1     | 3.430152869 | Tumor_G2 |
| 9032 | SURF1    | 6.566534869 | Tumor_G2 |
| 9033 | ATP6V1E1 | 6.86405464  | Tumor_G2 |
| 9034 | DLAT     | 5.324551595 | Tumor_G2 |
| 9035 | PDC      | 0.706203668 | Tumor_G2 |
| 9036 | SUCLG2   | 6.253942599 | Tumor_G2 |
| 9037 | SLC25A5  | 7.601923115 | Tumor_G2 |
| 9038 | UCP2     | 8.702550556 | Tumor_G2 |

|      |          |             |          |
|------|----------|-------------|----------|
| 9039 | SOD2     | 4.618527062 | Tumor_G2 |
| 9040 | NOX4     | 3.706777456 | Tumor_G2 |
| 9041 | DUOX1    | 7.041487449 | Tumor_G2 |
| 9042 | DUOXA1   | 7.235064537 | Tumor_G2 |
| 9043 | DUOX2    | 8.339538557 | Tumor_G2 |
| 9044 | DUOXA2   | 6.037009342 | Tumor_G2 |
| 9045 | NDUFA1   | 8.326816785 | Tumor_G2 |
| 9046 | NDUFA2   | 7.026571252 | Tumor_G2 |
| 9047 | NDUFA8   | 6.950689422 | Tumor_G2 |
| 9048 | NDUFB1   | 6.122685026 | Tumor_G2 |
| 9049 | NDUFB10  | 7.782177636 | Tumor_G2 |
| 9050 | NDUFB2   | 6.225803262 | Tumor_G2 |
| 9051 | NDUFB3   | 5.869685117 | Tumor_G2 |
| 9052 | NDUFB7   | 8.862249693 | Tumor_G2 |
| 9053 | CYC1     | 6.26195362  | Tumor_G2 |
| 9054 | ETFB     | 4.830091318 | Tumor_G2 |
| 9055 | UQCR10   | 7.676762392 | Tumor_G2 |
| 9056 | UQCRQ    | 7.449198187 | Tumor_G2 |
| 9057 | UQCC3    | 4.730474023 | Tumor_G2 |
| 9058 | COX15    | 4.078573506 | Tumor_G2 |
| 9059 | COX5A    | 6.9665124   | Tumor_G2 |
| 9060 | COX6B1   | 8.954254439 | Tumor_G2 |
| 9061 | COX6C    | 6.728031817 | Tumor_G2 |
| 9062 | COX7A2   | 6.673974483 | Tumor_G2 |
| 9063 | COX7B    | 5.956761113 | Tumor_G2 |
| 9064 | COX8A    | 9.32924304  | Tumor_G2 |
| 9065 | SCO1     | 2.341891882 | Tumor_G2 |
| 9066 | SURF1    | 6.081929859 | Tumor_G2 |
| 9067 | ATP6V1E1 | 6.590741968 | Tumor_G2 |
| 9068 | DLAT     | 4.005355906 | Tumor_G2 |
| 9069 | PDC      | 0           | Tumor_G2 |
| 9070 | SUCLG2   | 5.139493776 | Tumor_G2 |
| 9071 | SLC25A5  | 7.071606624 | Tumor_G2 |
| 9072 | UCP2     | 8.020689597 | Tumor_G2 |
| 9073 | SOD2     | 4.482069101 | Tumor_G2 |
| 9074 | NOX4     | 2.983628044 | Tumor_G2 |
| 9075 | DUOX1    | 6.016545312 | Tumor_G2 |
| 9076 | DUOXA1   | 6.369146323 | Tumor_G2 |
| 9077 | DUOX2    | 6.12608291  | Tumor_G2 |
| 9078 | DUOXA2   | 4.597354096 | Tumor_G2 |

|      |          |             |          |
|------|----------|-------------|----------|
| 9079 | NDUFA1   | 7.935062945 | Tumor_G2 |
| 9080 | NDUFA2   | 6.641598317 | Tumor_G2 |
| 9081 | NDUFA8   | 6.901670844 | Tumor_G2 |
| 9082 | NDUFB1   | 5.873395814 | Tumor_G2 |
| 9083 | NDUFB10  | 7.37859083  | Tumor_G2 |
| 9084 | NDUFB2   | 6.541204576 | Tumor_G2 |
| 9085 | NDUFB3   | 6.386923535 | Tumor_G2 |
| 9086 | NDUFB7   | 8.634907667 | Tumor_G2 |
| 9087 | CYC1     | 6.967003473 | Tumor_G2 |
| 9088 | ETFB     | 4.864634479 | Tumor_G2 |
| 9089 | UQCR10   | 7.659855561 | Tumor_G2 |
| 9090 | UQCRQ    | 6.892948051 | Tumor_G2 |
| 9091 | UQCC3    | 4.224652405 | Tumor_G2 |
| 9092 | COX15    | 5.240781421 | Tumor_G2 |
| 9093 | COX5A    | 7.208286117 | Tumor_G2 |
| 9094 | COX6B1   | 8.39209331  | Tumor_G2 |
| 9095 | COX6C    | 6.36238904  | Tumor_G2 |
| 9096 | COX7A2   | 6.75813754  | Tumor_G2 |
| 9097 | COX7B    | 6.13836427  | Tumor_G2 |
| 9098 | COX8A    | 9.614426725 | Tumor_G2 |
| 9099 | SCO1     | 3.766524451 | Tumor_G2 |
| 9100 | SURF1    | 6.552613957 | Tumor_G2 |
| 9101 | ATP6V1E1 | 6.757882272 | Tumor_G2 |
| 9102 | DLAT     | 5.214924085 | Tumor_G2 |
| 9103 | PDC      | 0.07389739  | Tumor_G2 |
| 9104 | SUCLG2   | 6.38587096  | Tumor_G2 |
| 9105 | SLC25A5  | 8.473671736 | Tumor_G2 |
| 9106 | UCP2     | 7.901852624 | Tumor_G2 |
| 9107 | SOD2     | 5.340219504 | Tumor_G2 |
| 9108 | NOX4     | 0.778826406 | Tumor_G2 |
| 9109 | DUOX1    | 6.423874537 | Tumor_G2 |
| 9110 | DUOXA1   | 6.2288965   | Tumor_G2 |
| 9111 | DUOX2    | 6.888428861 | Tumor_G2 |
| 9112 | DUOXA2   | 5.549971845 | Tumor_G2 |
| 9113 | NDUFA1   | 7.938816488 | Tumor_G2 |
| 9114 | NDUFA2   | 6.629593874 | Tumor_G2 |
| 9115 | NDUFA8   | 7.081946899 | Tumor_G2 |
| 9116 | NDUFB1   | 5.68493008  | Tumor_G2 |
| 9117 | NDUFB10  | 7.289289292 | Tumor_G2 |
| 9118 | NDUFB2   | 6.917697685 | Tumor_G2 |

|      |          |             |          |
|------|----------|-------------|----------|
| 9119 | NDUFB3   | 6.482805987 | Tumor_G2 |
| 9120 | NDUFB7   | 8.506312048 | Tumor_G2 |
| 9121 | CYC1     | 6.914992604 | Tumor_G2 |
| 9122 | ETFB     | 5.190097655 | Tumor_G2 |
| 9123 | UQCR10   | 7.586790558 | Tumor_G2 |
| 9124 | UQCRQ    | 7.186424208 | Tumor_G2 |
| 9125 | UQCC3    | 4.393797778 | Tumor_G2 |
| 9126 | COX15    | 5.57348476  | Tumor_G2 |
| 9127 | COX5A    | 7.08393321  | Tumor_G2 |
| 9128 | COX6B1   | 8.313531077 | Tumor_G2 |
| 9129 | COX6C    | 6.612734103 | Tumor_G2 |
| 9130 | COX7A2   | 6.821081543 | Tumor_G2 |
| 9131 | COX7B    | 6.289132695 | Tumor_G2 |
| 9132 | COX8A    | 9.688172    | Tumor_G2 |
| 9133 | SCO1     | 3.782517254 | Tumor_G2 |
| 9134 | SURF1    | 6.825691918 | Tumor_G2 |
| 9135 | ATP6V1E1 | 6.797147169 | Tumor_G2 |
| 9136 | DLAT     | 5.718989242 | Tumor_G2 |
| 9137 | PDC      | 0.282920001 | Tumor_G2 |
| 9138 | SUCLG2   | 6.771773054 | Tumor_G2 |
| 9139 | SLC25A5  | 8.316314058 | Tumor_G2 |
| 9140 | UCP2     | 8.161302273 | Tumor_G2 |
| 9141 | SOD2     | 5.051279849 | Tumor_G2 |
| 9142 | NOX4     | 1.408009841 | Tumor_G2 |
| 9143 | DUOX1    | 7.564515925 | Tumor_G2 |
| 9144 | DUOXA1   | 7.104246991 | Tumor_G2 |
| 9145 | DUOX2    | 9.120245927 | Tumor_G2 |
| 9146 | DUOXA2   | 6.186732375 | Tumor_G2 |
| 9147 | NDUFA1   | 8.5943389   | Tumor_G2 |
| 9148 | NDUFA2   | 7.236165371 | Tumor_G2 |
| 9149 | NDUFA8   | 7.65106167  | Tumor_G2 |
| 9150 | NDUFB1   | 6.063278508 | Tumor_G2 |
| 9151 | NDUFB10  | 8.043048405 | Tumor_G2 |
| 9152 | NDUFB2   | 6.992810742 | Tumor_G2 |
| 9153 | NDUFB3   | 7.040600385 | Tumor_G2 |
| 9154 | NDUFB7   | 8.265387402 | Tumor_G2 |
| 9155 | CYC1     | 8.029428124 | Tumor_G2 |
| 9156 | ETFB     | 5.501285124 | Tumor_G2 |
| 9157 | UQCR10   | 8.270537071 | Tumor_G2 |
| 9158 | UQCRQ    | 7.585296194 | Tumor_G2 |

|      |          |             |          |
|------|----------|-------------|----------|
| 9159 | UQCC3    | 5.020122098 | Tumor_G2 |
| 9160 | COX15    | 5.151163345 | Tumor_G2 |
| 9161 | COX5A    | 8.024144038 | Tumor_G2 |
| 9162 | COX6B1   | 8.910446    | Tumor_G2 |
| 9163 | COX6C    | 6.740281259 | Tumor_G2 |
| 9164 | COX7A2   | 7.351292556 | Tumor_G2 |
| 9165 | COX7B    | 6.356614557 | Tumor_G2 |
| 9166 | COX8A    | 10.397324   | Tumor_G2 |
| 9167 | SCO1     | 3.842686576 | Tumor_G2 |
| 9168 | SURF1    | 6.805295252 | Tumor_G2 |
| 9169 | ATP6V1E1 | 7.060290497 | Tumor_G2 |
| 9170 | DLAT     | 5.434097741 | Tumor_G2 |
| 9171 | PDC      | 0           | Tumor_G2 |
| 9172 | SUCLG2   | 6.575877531 | Tumor_G2 |
| 9173 | SLC25A5  | 8.961965086 | Tumor_G2 |
| 9174 | UCP2     | 6.139119229 | Tumor_G2 |
| 9175 | SOD2     | 4.004935265 | Tumor_G2 |
| 9176 | NOX4     | 2.359386768 | Tumor_G2 |
| 9177 | DUOX1    | 7.787820942 | Tumor_G2 |
| 9178 | DUOXA1   | 7.123810921 | Tumor_G2 |
| 9179 | DUOX2    | 6.255249317 | Tumor_G2 |
| 9180 | DUOXA2   | 6.995374513 | Tumor_G2 |
| 9181 | NDUFA1   | 8.352602763 | Tumor_G2 |
| 9182 | NDUFA2   | 7.096638037 | Tumor_G2 |
| 9183 | NDUFA8   | 7.638220529 | Tumor_G2 |
| 9184 | NDUFB1   | 6.473216513 | Tumor_G2 |
| 9185 | NDUFB10  | 7.666103041 | Tumor_G2 |
| 9186 | NDUFB2   | 7.103697053 | Tumor_G2 |
| 9187 | NDUFB3   | 6.802644094 | Tumor_G2 |
| 9188 | NDUFB7   | 8.928798047 | Tumor_G2 |
| 9189 | CYC1     | 7.294574532 | Tumor_G2 |
| 9190 | ETFB     | 5.329909453 | Tumor_G2 |
| 9191 | UQCR10   | 7.296786413 | Tumor_G2 |
| 9192 | UQCRQ    | 7.795019325 | Tumor_G2 |
| 9193 | UQCC3    | 4.699831623 | Tumor_G2 |
| 9194 | COX15    | 4.957605456 | Tumor_G2 |
| 9195 | COX5A    | 7.62602532  | Tumor_G2 |
| 9196 | COX6B1   | 8.811045566 | Tumor_G2 |
| 9197 | COX6C    | 6.932502523 | Tumor_G2 |
| 9198 | COX7A2   | 7.139993312 | Tumor_G2 |

|      |          |             |          |
|------|----------|-------------|----------|
| 9199 | COX7B    | 6.582224493 | Tumor_G2 |
| 9200 | COX8A    | 10.03035075 | Tumor_G2 |
| 9201 | SCO1     | 3.961680033 | Tumor_G2 |
| 9202 | SURF1    | 6.82508182  | Tumor_G2 |
| 9203 | ATP6V1E1 | 5.933356361 | Tumor_G2 |
| 9204 | DLAT     | 5.567450188 | Tumor_G2 |
| 9205 | PDC      | 0.107859367 | Tumor_G2 |
| 9206 | SUCLG2   | 6.340926108 | Tumor_G2 |
| 9207 | SLC25A5  | 8.358500731 | Tumor_G2 |
| 9208 | UCP2     | 8.087902552 | Tumor_G2 |
| 9209 | SOD2     | 4.760928781 | Tumor_G2 |
| 9210 | NOX4     | 2.015653252 | Tumor_G2 |
| 9211 | DUOX1    | 7.367289024 | Tumor_G2 |
| 9212 | DUOXA1   | 7.29179278  | Tumor_G2 |
| 9213 | DUOX2    | 9.671667825 | Tumor_G2 |
| 9214 | DUOXA2   | 7.855097451 | Tumor_G2 |
| 9215 | NDUFA1   | 8.160094554 | Tumor_G2 |
| 9216 | NDUFA2   | 6.877954102 | Tumor_G2 |
| 9217 | NDUFA8   | 7.295017484 | Tumor_G2 |
| 9218 | NDUFB1   | 5.857507824 | Tumor_G2 |
| 9219 | NDUFB10  | 7.614712341 | Tumor_G2 |
| 9220 | NDUFB2   | 6.363967407 | Tumor_G2 |
| 9221 | NDUFB3   | 6.443588479 | Tumor_G2 |
| 9222 | NDUFB7   | 8.884801023 | Tumor_G2 |
| 9223 | CYC1     | 6.79334495  | Tumor_G2 |
| 9224 | ETFB     | 5.302792823 | Tumor_G2 |
| 9225 | UQCR10   | 7.733709481 | Tumor_G2 |
| 9226 | UQCRQ    | 7.433185562 | Tumor_G2 |
| 9227 | UQCC3    | 4.576322475 | Tumor_G2 |
| 9228 | COX15    | 4.838184812 | Tumor_G2 |
| 9229 | COX5A    | 7.180902314 | Tumor_G2 |
| 9230 | COX6B1   | 8.825310163 | Tumor_G2 |
| 9231 | COX6C    | 6.766926604 | Tumor_G2 |
| 9232 | COX7A2   | 6.849869495 | Tumor_G2 |
| 9233 | COX7B    | 6.202010214 | Tumor_G2 |
| 9234 | COX8A    | 9.381015916 | Tumor_G2 |
| 9235 | SCO1     | 3.52199259  | Tumor_G2 |
| 9236 | SURF1    | 6.51064067  | Tumor_G2 |
| 9237 | ATP6V1E1 | 7.031506955 | Tumor_G2 |
| 9238 | DLAT     | 5.050571445 | Tumor_G2 |

|      |          |             |          |
|------|----------|-------------|----------|
| 9239 | PDC      | 0.487679813 | Tumor_G2 |
| 9240 | SUCLG2   | 5.990646648 | Tumor_G2 |
| 9241 | SLC25A5  | 7.65000609  | Tumor_G2 |
| 9242 | UCP2     | 8.824075009 | Tumor_G2 |
| 9243 | SOD2     | 4.88503102  | Tumor_G2 |
| 9244 | NOX4     | 3.393887646 | Tumor_G2 |
| 9245 | DUOX1    | 5.782934296 | Tumor_G2 |
| 9246 | DUOXA1   | 6.62531424  | Tumor_G2 |
| 9247 | DUOX2    | 6.414114507 | Tumor_G2 |
| 9248 | DUOXA2   | 4.502804971 | Tumor_G2 |
| 9249 | NDUFA1   | 8.342098038 | Tumor_G2 |
| 9250 | NDUFA2   | 6.496541012 | Tumor_G2 |
| 9251 | NDUFA8   | 7.311838294 | Tumor_G2 |
| 9252 | NDUFB1   | 6.500368844 | Tumor_G2 |
| 9253 | NDUFB10  | 7.412315352 | Tumor_G2 |
| 9254 | NDUFB2   | 5.367449399 | Tumor_G2 |
| 9255 | NDUFB3   | 6.32930897  | Tumor_G2 |
| 9256 | NDUFB7   | 8.589918956 | Tumor_G2 |
| 9257 | CYC1     | 6.020151935 | Tumor_G2 |
| 9258 | ETFB     | 4.474404205 | Tumor_G2 |
| 9259 | UQCR10   | 8.061769764 | Tumor_G2 |
| 9260 | UQCRQ    | 7.736208846 | Tumor_G2 |
| 9261 | UQCC3    | 3.298679108 | Tumor_G2 |
| 9262 | COX15    | 4.218281736 | Tumor_G2 |
| 9263 | COX5A    | 6.803657409 | Tumor_G2 |
| 9264 | COX6B1   | 9.280046218 | Tumor_G2 |
| 9265 | COX6C    | 6.588576852 | Tumor_G2 |
| 9266 | COX7A2   | 7.097093837 | Tumor_G2 |
| 9267 | COX7B    | 6.877902236 | Tumor_G2 |
| 9268 | COX8A    | 8.305665468 | Tumor_G2 |
| 9269 | SCO1     | 2.57119848  | Tumor_G2 |
| 9270 | SURF1    | 5.491083859 | Tumor_G2 |
| 9271 | ATP6V1E1 | 6.281233117 | Tumor_G2 |
| 9272 | DLAT     | 4.616155693 | Tumor_G2 |
| 9273 | PDC      | 0           | Tumor_G2 |
| 9274 | SUCLG2   | 5.146788786 | Tumor_G2 |
| 9275 | SLC25A5  | 7.758879728 | Tumor_G2 |
| 9276 | UCP2     | 6.541879335 | Tumor_G2 |
| 9277 | SOD2     | 4.491903603 | Tumor_G2 |
| 9278 | NOX4     | 1.136931417 | Tumor_G2 |



|      |          |             |          |
|------|----------|-------------|----------|
| 9279 | DUOX1    | 6.029189005 | Tumor_G2 |
| 9280 | DUOXA1   | 5.770418568 | Tumor_G2 |
| 9281 | DUOX2    | 6.13643924  | Tumor_G2 |
| 9282 | DUOXA2   | 2.323941706 | Tumor_G2 |
| 9283 | NDUFA1   | 7.788378833 | Tumor_G2 |
| 9284 | NDUFA2   | 6.447680904 | Tumor_G2 |
| 9285 | NDUFA8   | 7.00372283  | Tumor_G2 |
| 9286 | NDUFB1   | 5.571605155 | Tumor_G2 |
| 9287 | NDUFB10  | 7.455530039 | Tumor_G2 |
| 9288 | NDUFB2   | 6.354301654 | Tumor_G2 |
| 9289 | NDUFB3   | 6.267193747 | Tumor_G2 |
| 9290 | NDUFB7   | 8.439075719 | Tumor_G2 |
| 9291 | CYC1     | 6.695016865 | Tumor_G2 |
| 9292 | ETFB     | 4.785415651 | Tumor_G2 |
| 9293 | UQCR10   | 7.400706081 | Tumor_G2 |
| 9294 | UQCRQ    | 7.067503619 | Tumor_G2 |
| 9295 | UQCC3    | 4.179520462 | Tumor_G2 |
| 9296 | COX15    | 5.206417079 | Tumor_G2 |
| 9297 | COX5A    | 7.060153773 | Tumor_G2 |
| 9298 | COX6B1   | 8.39686958  | Tumor_G2 |
| 9299 | COX6C    | 6.317033431 | Tumor_G2 |
| 9300 | COX7A2   | 6.889654438 | Tumor_G2 |
| 9301 | COX7B    | 5.838007244 | Tumor_G2 |
| 9302 | COX8A    | 9.259663613 | Tumor_G2 |
| 9303 | SCO1     | 3.451127897 | Tumor_G2 |
| 9304 | SURF1    | 6.248975137 | Tumor_G2 |
| 9305 | ATP6V1E1 | 7.179352825 | Tumor_G2 |
| 9306 | DLAT     | 5.489739695 | Tumor_G2 |
| 9307 | PDC      | 0.076238763 | Tumor_G2 |
| 9308 | SUCLG2   | 6.49231173  | Tumor_G2 |
| 9309 | SLC25A5  | 7.843250055 | Tumor_G2 |
| 9310 | UCP2     | 9.044628746 | Tumor_G2 |
| 9311 | SOD2     | 5.143028242 | Tumor_G2 |
| 9312 | NOX4     | 2.634331979 | Tumor_G2 |
| 9313 | DUOX1    | 6.585906541 | Tumor_G2 |
| 9314 | DUOXA1   | 6.785232904 | Tumor_G2 |
| 9315 | DUOX2    | 7.723160289 | Tumor_G2 |
| 9316 | DUOXA2   | 5.33844378  | Tumor_G2 |
| 9317 | NDUFA1   | 8.42095712  | Tumor_G2 |
| 9318 | NDUFA2   | 6.941064965 | Tumor_G2 |

|      |          |             |          |
|------|----------|-------------|----------|
| 9319 | NDUFA8   | 7.224860487 | Tumor_G2 |
| 9320 | NDUFB1   | 5.878373707 | Tumor_G2 |
| 9321 | NDUFB10  | 7.605164491 | Tumor_G2 |
| 9322 | NDUFB2   | 6.344179984 | Tumor_G2 |
| 9323 | NDUFB3   | 6.436100629 | Tumor_G2 |
| 9324 | NDUFB7   | 8.88499404  | Tumor_G2 |
| 9325 | CYC1     | 6.825164901 | Tumor_G2 |
| 9326 | ETFB     | 5.163851019 | Tumor_G2 |
| 9327 | UQCR10   | 8.015270836 | Tumor_G2 |
| 9328 | UQCRQ    | 7.356519804 | Tumor_G2 |
| 9329 | UQCC3    | 4.5329237   | Tumor_G2 |
| 9330 | COX15    | 4.977454759 | Tumor_G2 |
| 9331 | COX5A    | 7.17169434  | Tumor_G2 |
| 9332 | COX6B1   | 8.883831488 | Tumor_G2 |
| 9333 | COX6C    | 6.742905725 | Tumor_G2 |
| 9334 | COX7A2   | 6.958949046 | Tumor_G2 |
| 9335 | COX7B    | 6.147386962 | Tumor_G2 |
| 9336 | COX8A    | 9.569667764 | Tumor_G2 |
| 9337 | SCO1     | 3.179038854 | Tumor_G2 |
| 9338 | SURF1    | 6.561244498 | Tumor_G2 |
| 9339 | ATP6V1E1 | 6.910599929 | Tumor_G2 |
| 9340 | DLAT     | 5.00306611  | Tumor_G2 |
| 9341 | PDC      | 0           | Tumor_G2 |
| 9342 | SUCLG2   | 6.107659232 | Tumor_G2 |
| 9343 | SLC25A5  | 7.535987218 | Tumor_G2 |
| 9344 | UCP2     | 9.127995509 | Tumor_G2 |
| 9345 | SOD2     | 5.394706423 | Tumor_G2 |
| 9346 | NOX4     | 1.534967787 | Tumor_G2 |
| 9347 | DUOX1    | 6.79412916  | Tumor_G2 |
| 9348 | DUOXA1   | 6.86940928  | Tumor_G2 |
| 9349 | DUOX2    | 7.102612332 | Tumor_G2 |
| 9350 | DUOXA2   | 5.493448317 | Tumor_G2 |
| 9351 | NDUFA1   | 8.608909881 | Tumor_G2 |
| 9352 | NDUFA2   | 7.406223209 | Tumor_G2 |
| 9353 | NDUFA8   | 7.244896534 | Tumor_G2 |
| 9354 | NDUFB1   | 6.050459039 | Tumor_G2 |
| 9355 | NDUFB10  | 8.123662955 | Tumor_G2 |
| 9356 | NDUFB2   | 5.59162204  | Tumor_G2 |
| 9357 | NDUFB3   | 5.506353174 | Tumor_G2 |
| 9358 | NDUFB7   | 9.30633543  | Tumor_G2 |

|      |          |             |          |
|------|----------|-------------|----------|
| 9359 | CYC1     | 6.288069635 | Tumor_G2 |
| 9360 | ETFB     | 5.393139679 | Tumor_G2 |
| 9361 | UQCR10   | 8.079061855 | Tumor_G2 |
| 9362 | UQCRQ    | 7.67444826  | Tumor_G2 |
| 9363 | UQCC3    | 5.191470781 | Tumor_G2 |
| 9364 | COX15    | 4.549749075 | Tumor_G2 |
| 9365 | COX5A    | 7.181113013 | Tumor_G2 |
| 9366 | COX6B1   | 9.43308085  | Tumor_G2 |
| 9367 | COX6C    | 7.168790584 | Tumor_G2 |
| 9368 | COX7A2   | 6.752847678 | Tumor_G2 |
| 9369 | COX7B    | 5.907411378 | Tumor_G2 |
| 9370 | COX8A    | 9.285822965 | Tumor_G2 |
| 9371 | SCO1     | 2.570765809 | Tumor_G2 |
| 9372 | SURF1    | 6.256106329 | Tumor_G2 |
| 9373 | ATP6V1E1 | 6.128443207 | Tumor_G2 |
| 9374 | DLAT     | 4.04128758  | Tumor_G2 |
| 9375 | PDC      | 0.180353449 | Tumor_G2 |
| 9376 | SUCLG2   | 4.930775812 | Tumor_G2 |
| 9377 | SLC25A5  | 5.909473408 | Tumor_G2 |
| 9378 | UCP2     | 7.165038814 | Tumor_G2 |
| 9379 | SOD2     | 3.55647155  | Tumor_G2 |
| 9380 | NOX4     | 2.912628192 | Tumor_G2 |
| 9381 | DUOX1    | 5.537406899 | Tumor_G2 |
| 9382 | DUOXA1   | 6.453647328 | Tumor_G2 |
| 9383 | DUOX2    | 5.780634181 | Tumor_G2 |
| 9384 | DUOXA2   | 5.048614217 | Tumor_G2 |
| 9385 | NDUFA1   | 8.228429861 | Tumor_G2 |
| 9386 | NDUFA2   | 6.769465975 | Tumor_G2 |
| 9387 | NDUFA8   | 7.18571849  | Tumor_G2 |
| 9388 | NDUFB1   | 5.962010877 | Tumor_G2 |
| 9389 | NDUFB10  | 7.456205443 | Tumor_G2 |
| 9390 | NDUFB2   | 6.658533031 | Tumor_G2 |
| 9391 | NDUFB3   | 6.576702801 | Tumor_G2 |
| 9392 | NDUFB7   | 8.827392462 | Tumor_G2 |
| 9393 | CYC1     | 6.760427604 | Tumor_G2 |
| 9394 | ETFB     | 5.108324674 | Tumor_G2 |
| 9395 | UQCR10   | 7.664632986 | Tumor_G2 |
| 9396 | UQCRQ    | 7.34021803  | Tumor_G2 |
| 9397 | UQCC3    | 4.427428662 | Tumor_G2 |
| 9398 | COX15    | 4.560138783 | Tumor_G2 |

|      |          |             |          |
|------|----------|-------------|----------|
| 9399 | COX5A    | 6.947681753 | Tumor_G2 |
| 9400 | COX6B1   | 8.597558522 | Tumor_G2 |
| 9401 | COX6C    | 6.361124941 | Tumor_G2 |
| 9402 | COX7A2   | 6.986539028 | Tumor_G2 |
| 9403 | COX7B    | 6.28108372  | Tumor_G2 |
| 9404 | COX8A    | 9.568112806 | Tumor_G2 |
| 9405 | SCO1     | 3.278578591 | Tumor_G2 |
| 9406 | SURF1    | 6.407763714 | Tumor_G2 |
| 9407 | ATP6V1E1 | 6.875823746 | Tumor_G2 |
| 9408 | DLAT     | 4.873256631 | Tumor_G2 |
| 9409 | PDC      | 0.156509488 | Tumor_G2 |
| 9410 | SUCLG2   | 5.508539337 | Tumor_G2 |
| 9411 | SLC25A5  | 8.026300281 | Tumor_G2 |
| 9412 | UCP2     | 7.424422331 | Tumor_G2 |
| 9413 | SOD2     | 4.844276811 | Tumor_G2 |
| 9414 | NOX4     | 2.013319181 | Tumor_G2 |
| 9415 | DUOX1    | 7.726641538 | Tumor_G2 |
| 9416 | DUOXA1   | 7.783845584 | Tumor_G2 |
| 9417 | DUOX2    | 7.99210974  | Tumor_G2 |
| 9418 | DUOXA2   | 5.43872851  | Tumor_G2 |
| 9419 | NDUFA1   | 7.858222399 | Tumor_G2 |
| 9420 | NDUFA2   | 6.657865215 | Tumor_G2 |
| 9421 | NDUFA8   | 7.022370878 | Tumor_G2 |
| 9422 | NDUFB1   | 5.589236788 | Tumor_G2 |
| 9423 | NDUFB10  | 7.076720709 | Tumor_G2 |
| 9424 | NDUFB2   | 6.503810809 | Tumor_G2 |
| 9425 | NDUFB3   | 6.259340418 | Tumor_G2 |
| 9426 | NDUFB7   | 8.146078748 | Tumor_G2 |
| 9427 | CYC1     | 6.775760237 | Tumor_G2 |
| 9428 | ETFB     | 5.174351971 | Tumor_G2 |
| 9429 | UQCR10   | 6.789222347 | Tumor_G2 |
| 9430 | UQCRQ    | 6.867387325 | Tumor_G2 |
| 9431 | UQCC3    | 3.701757628 | Tumor_G2 |
| 9432 | COX15    | 5.25780161  | Tumor_G2 |
| 9433 | COX5A    | 6.627471612 | Tumor_G2 |
| 9434 | COX6B1   | 8.372469925 | Tumor_G2 |
| 9435 | COX6C    | 6.381437552 | Tumor_G2 |
| 9436 | COX7A2   | 6.785508297 | Tumor_G2 |
| 9437 | COX7B    | 5.910984497 | Tumor_G2 |
| 9438 | COX8A    | 9.042120819 | Tumor_G2 |

|      |          |             |          |
|------|----------|-------------|----------|
| 9439 | SCO1     | 3.994732416 | Tumor_G2 |
| 9440 | SURF1    | 6.593704792 | Tumor_G2 |
| 9441 | ATP6V1E1 | 6.144268763 | Tumor_G2 |
| 9442 | DLAT     | 5.455020975 | Tumor_G2 |
| 9443 | PDC      | 0.389393666 | Tumor_G2 |
| 9444 | SUCLG2   | 6.732289089 | Tumor_G2 |
| 9445 | SLC25A5  | 8.243703811 | Tumor_G2 |
| 9446 | UCP2     | 6.128719025 | Tumor_G2 |
| 9447 | SOD2     | 4.801925237 | Tumor_G2 |
| 9448 | NOX4     | 1.63681598  | Tumor_G2 |
| 9449 | DUOX1    | 7.872642353 | Tumor_G2 |
| 9450 | DUOXA1   | 7.448966193 | Tumor_G2 |
| 9451 | DUOX2    | 10.42453257 | Tumor_G2 |
| 9452 | DUOXA2   | 6.930425633 | Tumor_G2 |
| 9453 | NDUFA1   | 7.735354015 | Tumor_G2 |
| 9454 | NDUFA2   | 6.5886067   | Tumor_G2 |
| 9455 | NDUFA8   | 7.047525861 | Tumor_G2 |
| 9456 | NDUFB1   | 5.44370558  | Tumor_G2 |
| 9457 | NDUFB10  | 7.349864469 | Tumor_G2 |
| 9458 | NDUFB2   | 6.105641498 | Tumor_G2 |
| 9459 | NDUFB3   | 6.116876213 | Tumor_G2 |
| 9460 | NDUFB7   | 8.504400783 | Tumor_G2 |
| 9461 | CYC1     | 6.447167955 | Tumor_G2 |
| 9462 | ETFB     | 4.985292067 | Tumor_G2 |
| 9463 | UQCR10   | 7.482884511 | Tumor_G2 |
| 9464 | UQCRQ    | 6.984499413 | Tumor_G2 |
| 9465 | UQCC3    | 4.133339597 | Tumor_G2 |
| 9466 | COX15    | 4.643110305 | Tumor_G2 |
| 9467 | COX5A    | 6.91031643  | Tumor_G2 |
| 9468 | COX6B1   | 8.72589038  | Tumor_G2 |
| 9469 | COX6C    | 6.098860705 | Tumor_G2 |
| 9470 | COX7A2   | 6.742448885 | Tumor_G2 |
| 9471 | COX7B    | 5.921361826 | Tumor_G2 |
| 9472 | COX8A    | 9.183348476 | Tumor_G2 |
| 9473 | SCO1     | 3.153090873 | Tumor_G2 |
| 9474 | SURF1    | 6.643030899 | Tumor_G2 |
| 9475 | ATP6V1E1 | 7.030382651 | Tumor_G2 |
| 9476 | DLAT     | 5.080397108 | Tumor_G2 |
| 9477 | PDC      | 0.201050865 | Tumor_G2 |
| 9478 | SUCLG2   | 5.957242731 | Tumor_G2 |

|      |          |             |          |
|------|----------|-------------|----------|
| 9479 | SLC25A5  | 7.817979209 | Tumor_G2 |
| 9480 | UCP2     | 9.589514024 | Tumor_G2 |
| 9481 | SOD2     | 5.100400532 | Tumor_G2 |
| 9482 | NOX4     | 3.66970067  | Tumor_G2 |
| 9483 | DUOX1    | 6.415690658 | Tumor_G2 |
| 9484 | DUOXA1   | 7.040223452 | Tumor_G2 |
| 9485 | DUOX2    | 7.77357117  | Tumor_G2 |
| 9486 | DUOXA2   | 5.389152012 | Tumor_G2 |
| 9487 | NDUFA1   | 7.905856234 | Tumor_G2 |
| 9488 | NDUFA2   | 6.700875492 | Tumor_G2 |
| 9489 | NDUFA8   | 6.908484541 | Tumor_G2 |
| 9490 | NDUFB1   | 5.705569771 | Tumor_G2 |
| 9491 | NDUFB10  | 7.356444339 | Tumor_G2 |
| 9492 | NDUFB2   | 6.146607337 | Tumor_G2 |
| 9493 | NDUFB3   | 6.368106515 | Tumor_G2 |
| 9494 | NDUFB7   | 8.603535414 | Tumor_G2 |
| 9495 | CYC1     | 6.645195092 | Tumor_G2 |
| 9496 | ETFB     | 4.947405467 | Tumor_G2 |
| 9497 | UQCR10   | 7.482549789 | Tumor_G2 |
| 9498 | UQCRQ    | 6.995358048 | Tumor_G2 |
| 9499 | UQCC3    | 4.567486133 | Tumor_G2 |
| 9500 | COX15    | 4.798033507 | Tumor_G2 |
| 9501 | COX5A    | 6.779541857 | Tumor_G2 |
| 9502 | COX6B1   | 8.533106368 | Tumor_G2 |
| 9503 | COX6C    | 6.322565192 | Tumor_G2 |
| 9504 | COX7A2   | 6.767516101 | Tumor_G2 |
| 9505 | COX7B    | 5.871200562 | Tumor_G2 |
| 9506 | COX8A    | 9.160868862 | Tumor_G2 |
| 9507 | SCO1     | 3.246291576 | Tumor_G2 |
| 9508 | SURF1    | 6.261517823 | Tumor_G2 |
| 9509 | ATP6V1E1 | 6.970964754 | Tumor_G2 |
| 9510 | DLAT     | 4.920588145 | Tumor_G2 |
| 9511 | PDC      | 0.285309417 | Tumor_G2 |
| 9512 | SUCLG2   | 5.821377598 | Tumor_G2 |
| 9513 | SLC25A5  | 7.9956518   | Tumor_G2 |
| 9514 | UCP2     | 9.113466641 | Tumor_G2 |
| 9515 | SOD2     | 4.898010113 | Tumor_G2 |
| 9516 | NOX4     | 3.044881517 | Tumor_G2 |
| 9517 | DUOX1    | 6.596643281 | Tumor_G2 |
| 9518 | DUOXA1   | 6.665132441 | Tumor_G2 |

|      |          |             |          |
|------|----------|-------------|----------|
| 9519 | DUOX2    | 7.580725527 | Tumor_G2 |
| 9520 | DUOXA2   | 5.621825611 | Tumor_G2 |
| 9521 | NDUFA1   | 8.342675758 | Tumor_G2 |
| 9522 | NDUFA2   | 7.189420522 | Tumor_G2 |
| 9523 | NDUFA8   | 7.390588491 | Tumor_G2 |
| 9524 | NDUFB1   | 6.269040262 | Tumor_G2 |
| 9525 | NDUFB10  | 7.734684746 | Tumor_G2 |
| 9526 | NDUFB2   | 6.834123145 | Tumor_G2 |
| 9527 | NDUFB3   | 6.570149897 | Tumor_G2 |
| 9528 | NDUFB7   | 9.260059302 | Tumor_G2 |
| 9529 | CYC1     | 6.892777725 | Tumor_G2 |
| 9530 | ETFB     | 5.313619808 | Tumor_G2 |
| 9531 | UQCR10   | 7.851328946 | Tumor_G2 |
| 9532 | UQCRQ    | 7.567727975 | Tumor_G2 |
| 9533 | UQCC3    | 4.890917426 | Tumor_G2 |
| 9534 | COX15    | 4.626211604 | Tumor_G2 |
| 9535 | COX5A    | 7.066648979 | Tumor_G2 |
| 9536 | COX6B1   | 9.084727647 | Tumor_G2 |
| 9537 | COX6C    | 6.764598491 | Tumor_G2 |
| 9538 | COX7A2   | 6.876710934 | Tumor_G2 |
| 9539 | COX7B    | 6.310049591 | Tumor_G2 |
| 9540 | COX8A    | 9.937018655 | Tumor_G2 |
| 9541 | SCO1     | 2.83892883  | Tumor_G2 |
| 9542 | SURF1    | 6.370194175 | Tumor_G2 |
| 9543 | ATP6V1E1 | 6.816772193 | Tumor_G2 |
| 9544 | DLAT     | 4.395004079 | Tumor_G2 |
| 9545 | PDC      | 0.147980358 | Tumor_G2 |
| 9546 | SUCLG2   | 5.43883749  | Tumor_G2 |
| 9547 | SLC25A5  | 7.697014816 | Tumor_G2 |
| 9548 | UCP2     | 8.543804101 | Tumor_G2 |
| 9549 | SOD2     | 4.729648519 | Tumor_G2 |
| 9550 | NOX4     | 2.057796021 | Tumor_G2 |
| 9551 | DUOX1    | 6.404211499 | Tumor_G2 |
| 9552 | DUOXA1   | 6.371929277 | Tumor_G2 |
| 9553 | DUOX2    | 6.530100448 | Tumor_G2 |
| 9554 | DUOXA2   | 5.207178107 | Tumor_G2 |
| 9555 | NDUFA1   | 8.344885767 | Tumor_G2 |
| 9556 | NDUFA2   | 7.081499721 | Tumor_G2 |
| 9557 | NDUFA8   | 7.418462857 | Tumor_G2 |
| 9558 | NDUFB1   | 6.013362501 | Tumor_G2 |

|      |          |             |          |
|------|----------|-------------|----------|
| 9559 | NDUFB10  | 7.851978982 | Tumor_G2 |
| 9560 | NDUFB2   | 7.287591726 | Tumor_G2 |
| 9561 | NDUFB3   | 6.684702357 | Tumor_G2 |
| 9562 | NDUFB7   | 9.309967403 | Tumor_G2 |
| 9563 | CYC1     | 7.333372087 | Tumor_G2 |
| 9564 | ETFB     | 5.741932938 | Tumor_G2 |
| 9565 | UQCR10   | 7.939728845 | Tumor_G2 |
| 9566 | UQCRQ    | 7.51005591  | Tumor_G2 |
| 9567 | UQCC3    | 4.916575813 | Tumor_G2 |
| 9568 | COX15    | 4.90602042  | Tumor_G2 |
| 9569 | COX5A    | 7.022339837 | Tumor_G2 |
| 9570 | COX6B1   | 9.173971826 | Tumor_G2 |
| 9571 | COX6C    | 6.717541085 | Tumor_G2 |
| 9572 | COX7A2   | 7.203387463 | Tumor_G2 |
| 9573 | COX7B    | 6.223264485 | Tumor_G2 |
| 9574 | COX8A    | 9.57140362  | Tumor_G2 |
| 9575 | SCO1     | 3.300738378 | Tumor_G2 |
| 9576 | SURF1    | 7.030302281 | Tumor_G2 |
| 9577 | ATP6V1E1 | 7.012750923 | Tumor_G2 |
| 9578 | DLAT     | 4.556181683 | Tumor_G2 |
| 9579 | PDC      | 0           | Tumor_G2 |
| 9580 | SUCLG2   | 6.057996596 | Tumor_G2 |
| 9581 | SLC25A5  | 8.132215458 | Tumor_G2 |
| 9582 | UCP2     | 7.967440023 | Tumor_G2 |
| 9583 | SOD2     | 4.40276385  | Tumor_G2 |
| 9584 | NOX4     | 2.113485724 | Tumor_G2 |
| 9585 | DUOX1    | 7.233112627 | Tumor_G2 |
| 9586 | DUOXA1   | 7.438336641 | Tumor_G2 |
| 9587 | DUOX2    | 8.076083888 | Tumor_G2 |
| 9588 | DUOXA2   | 6.361148427 | Tumor_G2 |
| 9589 | NDUFA1   | 8.768334393 | Tumor_G2 |
| 9590 | NDUFA2   | 7.349310968 | Tumor_G2 |
| 9591 | NDUFA8   | 7.486254317 | Tumor_G2 |
| 9592 | NDUFB1   | 6.340753376 | Tumor_G2 |
| 9593 | NDUFB10  | 8.052683361 | Tumor_G2 |
| 9594 | NDUFB2   | 7.828468265 | Tumor_G2 |
| 9595 | NDUFB3   | 6.97189462  | Tumor_G2 |
| 9596 | NDUFB7   | 9.231225807 | Tumor_G2 |
| 9597 | CYC1     | 7.617760182 | Tumor_G2 |
| 9598 | ETFB     | 5.345071771 | Tumor_G2 |



|      |          |             |          |
|------|----------|-------------|----------|
| 9599 | UQCR10   | 8.34017299  | Tumor_G2 |
| 9600 | UQCRQ    | 7.847130435 | Tumor_G2 |
| 9601 | UQCC3    | 4.913660179 | Tumor_G2 |
| 9602 | COX15    | 4.788119111 | Tumor_G2 |
| 9603 | COX5A    | 7.93737729  | Tumor_G2 |
| 9604 | COX6B1   | 9.424270909 | Tumor_G2 |
| 9605 | COX6C    | 7.141373851 | Tumor_G2 |
| 9606 | COX7A2   | 7.6310836   | Tumor_G2 |
| 9607 | COX7B    | 6.95836278  | Tumor_G2 |
| 9608 | COX8A    | 10.18841306 | Tumor_G2 |
| 9609 | SCO1     | 3.375811858 | Tumor_G2 |
| 9610 | SURF1    | 6.27533763  | Tumor_G2 |
| 9611 | ATP6V1E1 | 7.77325877  | Tumor_G2 |
| 9612 | DLAT     | 5.426699501 | Tumor_G2 |
| 9613 | PDC      | 0.047176884 | Tumor_G2 |
| 9614 | SUCLG2   | 6.550973363 | Tumor_G2 |
| 9615 | SLC25A5  | 8.714501192 | Tumor_G2 |
| 9616 | UCP2     | 8.555638665 | Tumor_G2 |
| 9617 | SOD2     | 4.012412189 | Tumor_G2 |
| 9618 | NOX4     | 1.856479409 | Tumor_G2 |
| 9619 | DUOX1    | 6.235442158 | Tumor_G2 |
| 9620 | DUOXA1   | 6.177915071 | Tumor_G2 |
| 9621 | DUOX2    | 6.082750528 | Tumor_G2 |
| 9622 | DUOXA2   | 4.246800161 | Tumor_G2 |
| 9623 | NDUFA1   | 8.456943863 | Tumor_G2 |
| 9624 | NDUFA2   | 7.177039993 | Tumor_G2 |
| 9625 | NDUFA8   | 7.222154227 | Tumor_G2 |
| 9626 | NDUFB1   | 6.396206701 | Tumor_G2 |
| 9627 | NDUFB10  | 7.682088224 | Tumor_G2 |
| 9628 | NDUFB2   | 7.350292532 | Tumor_G2 |
| 9629 | NDUFB3   | 6.896244575 | Tumor_G2 |
| 9630 | NDUFB7   | 8.858583733 | Tumor_G2 |
| 9631 | CYC1     | 7.186343279 | Tumor_G2 |
| 9632 | ETFB     | 5.256591873 | Tumor_G2 |
| 9633 | UQCR10   | 8.146728433 | Tumor_G2 |
| 9634 | UQCRQ    | 7.493195019 | Tumor_G2 |
| 9635 | UQCC3    | 4.716993331 | Tumor_G2 |
| 9636 | COX15    | 5.181399817 | Tumor_G2 |
| 9637 | COX5A    | 7.365262466 | Tumor_G2 |
| 9638 | COX6B1   | 8.793390471 | Tumor_G2 |

|      |          |             |          |
|------|----------|-------------|----------|
| 9639 | COX6C    | 6.81001779  | Tumor_G2 |
| 9640 | COX7A2   | 7.328038589 | Tumor_G2 |
| 9641 | COX7B    | 6.501474571 | Tumor_G2 |
| 9642 | COX8A    | 10.1586921  | Tumor_G2 |
| 9643 | SCO1     | 4.392829372 | Tumor_G2 |
| 9644 | SURF1    | 7.016807465 | Tumor_G2 |
| 9645 | ATP6V1E1 | 7.006363292 | Tumor_G2 |
| 9646 | DLAT     | 5.385145092 | Tumor_G2 |
| 9647 | PDC      | 0.367869687 | Tumor_G2 |
| 9648 | SUCLG2   | 6.394093839 | Tumor_G2 |
| 9649 | SLC25A5  | 8.399206771 | Tumor_G2 |
| 9650 | UCP2     | 8.129596654 | Tumor_G2 |
| 9651 | SOD2     | 4.704031991 | Tumor_G2 |
| 9652 | NOX4     | 1.001820818 | Tumor_G2 |
| 9653 | DUOX1    | 7.237758606 | Tumor_G2 |
| 9654 | DUOXA1   | 7.10828148  | Tumor_G2 |
| 9655 | DUOX2    | 8.128787014 | Tumor_G2 |
| 9656 | DUOXA2   | 6.292354869 | Tumor_G2 |
| 9657 | NDUFA1   | 8.265079404 | Tumor_G2 |
| 9658 | NDUFA2   | 6.871406409 | Tumor_G2 |
| 9659 | NDUFA8   | 7.074216937 | Tumor_G2 |
| 9660 | NDUFB1   | 5.898998015 | Tumor_G2 |
| 9661 | NDUFB10  | 7.568891061 | Tumor_G2 |
| 9662 | NDUFB2   | 5.939550704 | Tumor_G2 |
| 9663 | NDUFB3   | 5.472606794 | Tumor_G2 |
| 9664 | NDUFB7   | 8.687310672 | Tumor_G2 |
| 9665 | CYC1     | 6.388142871 | Tumor_G2 |
| 9666 | ETFB     | 4.755424603 | Tumor_G2 |
| 9667 | UQCR10   | 6.67537133  | Tumor_G2 |
| 9668 | UQCRQ    | 7.129140018 | Tumor_G2 |
| 9669 | UQCC3    | 4.426944618 | Tumor_G2 |
| 9670 | COX15    | 4.425608719 | Tumor_G2 |
| 9671 | COX5A    | 6.964367246 | Tumor_G2 |
| 9672 | COX6B1   | 8.892739916 | Tumor_G2 |
| 9673 | COX6C    | 6.479594815 | Tumor_G2 |
| 9674 | COX7A2   | 6.611469126 | Tumor_G2 |
| 9675 | COX7B    | 5.827337614 | Tumor_G2 |
| 9676 | COX8A    | 9.202910891 | Tumor_G2 |
| 9677 | SCO1     | 2.381447104 | Tumor_G2 |
| 9678 | SURF1    | 6.283927582 | Tumor_G2 |

|      |          |             |          |
|------|----------|-------------|----------|
| 9679 | ATP6V1E1 | 5.764740981 | Tumor_G2 |
| 9680 | DLAT     | 3.992434225 | Tumor_G2 |
| 9681 | PDC      | 0.128436824 | Tumor_G2 |
| 9682 | SUCLG2   | 5.284913215 | Tumor_G2 |
| 9683 | SLC25A5  | 6.813765464 | Tumor_G2 |
| 9684 | UCP2     | 8.638477725 | Tumor_G2 |
| 9685 | SOD2     | 3.495755797 | Tumor_G2 |
| 9686 | NOX4     | 2.517099902 | Tumor_G2 |
| 9687 | DUOX1    | 5.483140216 | Tumor_G2 |
| 9688 | DUOXA1   | 5.751438495 | Tumor_G2 |
| 9689 | DUOX2    | 6.720263306 | Tumor_G2 |
| 9690 | DUOXA2   | 4.399965196 | Tumor_G2 |
| 9691 | NDUFA1   | 8.181428084 | Tumor_G2 |
| 9692 | NDUFA2   | 7.085162729 | Tumor_G2 |
| 9693 | NDUFA8   | 7.2831837   | Tumor_G2 |
| 9694 | NDUFB1   | 6.074525145 | Tumor_G2 |
| 9695 | NDUFB10  | 7.80796548  | Tumor_G2 |
| 9696 | NDUFB2   | 6.565322076 | Tumor_G2 |
| 9697 | NDUFB3   | 6.257008291 | Tumor_G2 |
| 9698 | NDUFB7   | 8.977760224 | Tumor_G2 |
| 9699 | CYC1     | 6.788102764 | Tumor_G2 |
| 9700 | ETFB     | 5.022644719 | Tumor_G2 |
| 9701 | UQCR10   | 7.629430119 | Tumor_G2 |
| 9702 | UQCRQ    | 7.470548196 | Tumor_G2 |
| 9703 | UQCC3    | 4.601962297 | Tumor_G2 |
| 9704 | COX15    | 4.464544815 | Tumor_G2 |
| 9705 | COX5A    | 7.202038597 | Tumor_G2 |
| 9706 | COX6B1   | 8.925453721 | Tumor_G2 |
| 9707 | COX6C    | 6.539973906 | Tumor_G2 |
| 9708 | COX7A2   | 7.038887203 | Tumor_G2 |
| 9709 | COX7B    | 6.26935351  | Tumor_G2 |
| 9710 | COX8A    | 9.42744512  | Tumor_G2 |
| 9711 | SCO1     | 2.909323469 | Tumor_G2 |
| 9712 | SURF1    | 6.385427264 | Tumor_G2 |
| 9713 | ATP6V1E1 | 6.690278016 | Tumor_G2 |
| 9714 | DLAT     | 4.608750615 | Tumor_G2 |
| 9715 | PDC      | 0.305462448 | Tumor_G2 |
| 9716 | SUCLG2   | 5.533552652 | Tumor_G2 |
| 9717 | SLC25A5  | 7.737643153 | Tumor_G2 |
| 9718 | UCP2     | 7.937085144 | Tumor_G2 |

|      |          |             |          |
|------|----------|-------------|----------|
| 9719 | SOD2     | 4.7009266   | Tumor_G2 |
| 9720 | NOX4     | 3.24450342  | Tumor_G2 |
| 9721 | DUOX1    | 6.373796812 | Tumor_G2 |
| 9722 | DUOXA1   | 6.624972623 | Tumor_G2 |
| 9723 | DUOX2    | 6.850335119 | Tumor_G2 |
| 9724 | DUOXA2   | 5.482328134 | Tumor_G2 |
| 9725 | NDUFA1   | 8.071956218 | Tumor_G2 |
| 9726 | NDUFA2   | 6.828633527 | Tumor_G2 |
| 9727 | NDUFA8   | 7.057169095 | Tumor_G2 |
| 9728 | NDUFB1   | 5.640799006 | Tumor_G2 |
| 9729 | NDUFB10  | 7.481549782 | Tumor_G2 |
| 9730 | NDUFB2   | 6.610202602 | Tumor_G2 |
| 9731 | NDUFB3   | 6.513176269 | Tumor_G2 |
| 9732 | NDUFB7   | 8.518871734 | Tumor_G2 |
| 9733 | CYC1     | 6.877209553 | Tumor_G2 |
| 9734 | ETFB     | 4.760992503 | Tumor_G2 |
| 9735 | UQCR10   | 7.648815433 | Tumor_G2 |
| 9736 | UQCRQ    | 7.264930849 | Tumor_G2 |
| 9737 | UQCC3    | 4.110308734 | Tumor_G2 |
| 9738 | COX15    | 4.762894285 | Tumor_G2 |
| 9739 | COX5A    | 7.146059638 | Tumor_G2 |
| 9740 | COX6B1   | 8.699557433 | Tumor_G2 |
| 9741 | COX6C    | 6.382722258 | Tumor_G2 |
| 9742 | COX7A2   | 6.969411349 | Tumor_G2 |
| 9743 | COX7B    | 6.267352539 | Tumor_G2 |
| 9744 | COX8A    | 9.473887763 | Tumor_G2 |
| 9745 | SCO1     | 3.361038444 | Tumor_G2 |
| 9746 | SURF1    | 6.151338044 | Tumor_G2 |
| 9747 | ATP6V1E1 | 6.880830241 | Tumor_G2 |
| 9748 | DLAT     | 5.059782899 | Tumor_G2 |
| 9749 | PDC      | 0.172570345 | Tumor_G2 |
| 9750 | SUCLG2   | 5.894215773 | Tumor_G2 |
| 9751 | SLC25A5  | 8.07241607  | Tumor_G2 |
| 9752 | UCP2     | 8.684382298 | Tumor_G2 |
| 9753 | SOD2     | 4.913501079 | Tumor_G2 |
| 9754 | NOX4     | 2.402952357 | Tumor_G2 |
| 9755 | DUOX1    | 6.565913887 | Tumor_G2 |
| 9756 | DUOXA1   | 6.940632792 | Tumor_G2 |
| 9757 | DUOX2    | 6.562349614 | Tumor_G2 |
| 9758 | DUOXA2   | 4.740730132 | Tumor_G2 |

|      |          |             |          |
|------|----------|-------------|----------|
| 9759 | NDUFA1   | 8.465935967 | Tumor_G2 |
| 9760 | NDUFA2   | 7.022421235 | Tumor_G2 |
| 9761 | NDUFA8   | 7.500994314 | Tumor_G2 |
| 9762 | NDUFB1   | 6.285550929 | Tumor_G2 |
| 9763 | NDUFB10  | 7.831928114 | Tumor_G2 |
| 9764 | NDUFB2   | 7.027065938 | Tumor_G2 |
| 9765 | NDUFB3   | 6.740745636 | Tumor_G2 |
| 9766 | NDUFB7   | 9.100054249 | Tumor_G2 |
| 9767 | CYC1     | 7.286926692 | Tumor_G2 |
| 9768 | ETFB     | 5.548423923 | Tumor_G2 |
| 9769 | UQCR10   | 7.878035435 | Tumor_G2 |
| 9770 | UQCRQ    | 7.836528215 | Tumor_G2 |
| 9771 | UQCC3    | 4.918082407 | Tumor_G2 |
| 9772 | COX15    | 5.201691098 | Tumor_G2 |
| 9773 | COX5A    | 7.483365399 | Tumor_G2 |
| 9774 | COX6B1   | 8.852739675 | Tumor_G2 |
| 9775 | COX6C    | 6.927348182 | Tumor_G2 |
| 9776 | COX7A2   | 7.194934219 | Tumor_G2 |
| 9777 | COX7B    | 6.495133607 | Tumor_G2 |
| 9778 | COX8A    | 10.26624763 | Tumor_G2 |
| 9779 | SCO1     | 3.635707488 | Tumor_G2 |
| 9780 | SURF1    | 7.154763887 | Tumor_G2 |
| 9781 | ATP6V1E1 | 6.807999939 | Tumor_G2 |
| 9782 | DLAT     | 5.059913283 | Tumor_G2 |
| 9783 | PDC      | 0.528085843 | Tumor_G2 |
| 9784 | SUCLG2   | 6.577643275 | Tumor_G2 |
| 9785 | SLC25A5  | 8.146380382 | Tumor_G2 |
| 9786 | UCP2     | 8.067451544 | Tumor_G2 |
| 9787 | SOD2     | 4.107000732 | Tumor_G2 |
| 9788 | NOX4     | 1.423785119 | Tumor_G2 |
| 9789 | DUOX1    | 8.360964064 | Tumor_G2 |
| 9790 | DUOXA1   | 7.702687024 | Tumor_G2 |
| 9791 | DUOX2    | 10.38982204 | Tumor_G2 |
| 9792 | DUOXA2   | 8.359734733 | Tumor_G2 |
| 9793 | NDUFA1   | 8.087163601 | Tumor_G2 |
| 9794 | NDUFA2   | 7.007676809 | Tumor_G2 |
| 9795 | NDUFA8   | 7.358041554 | Tumor_G2 |
| 9796 | NDUFB1   | 5.876754784 | Tumor_G2 |
| 9797 | NDUFB10  | 7.995255723 | Tumor_G2 |
| 9798 | NDUFB2   | 6.272887035 | Tumor_G2 |

|      |          |             |          |
|------|----------|-------------|----------|
| 9799 | NDUFB3   | 6.234675367 | Tumor_G2 |
| 9800 | NDUFB7   | 8.831444503 | Tumor_G2 |
| 9801 | CYC1     | 6.917281092 | Tumor_G2 |
| 9802 | ETFB     | 5.179973899 | Tumor_G2 |
| 9803 | UQCR10   | 7.065830357 | Tumor_G2 |
| 9804 | UQCRQ    | 7.506609057 | Tumor_G2 |
| 9805 | UQCC3    | 4.345613054 | Tumor_G2 |
| 9806 | COX15    | 4.625058707 | Tumor_G2 |
| 9807 | COX5A    | 7.227149753 | Tumor_G2 |
| 9808 | COX6B1   | 8.847740314 | Tumor_G2 |
| 9809 | COX6C    | 6.683201267 | Tumor_G2 |
| 9810 | COX7A2   | 6.904778814 | Tumor_G2 |
| 9811 | COX7B    | 6.220517334 | Tumor_G2 |
| 9812 | COX8A    | 9.601085176 | Tumor_G2 |
| 9813 | SCO1     | 3.094776227 | Tumor_G2 |
| 9814 | SURF1    | 6.248830457 | Tumor_G2 |
| 9815 | ATP6V1E1 | 6.162222558 | Tumor_G2 |
| 9816 | DLAT     | 4.717816449 | Tumor_G2 |
| 9817 | PDC      | 0.222113558 | Tumor_G2 |
| 9818 | SUCLG2   | 5.936024618 | Tumor_G2 |
| 9819 | SLC25A5  | 7.96586624  | Tumor_G2 |
| 9820 | UCP2     | 8.122228788 | Tumor_G2 |
| 9821 | SOD2     | 4.767632505 | Tumor_G2 |
| 9822 | NOX4     | 3.530627905 | Tumor_G2 |
| 9823 | DUOX1    | 6.697569738 | Tumor_G2 |
| 9824 | DUOXA1   | 6.824205262 | Tumor_G2 |
| 9825 | DUOX2    | 7.40217112  | Tumor_G2 |
| 9826 | DUOXA2   | 4.735139546 | Tumor_G2 |
| 9827 | NDUFA1   | 7.312822368 | Tumor_G2 |
| 9828 | NDUFA2   | 6.307955525 | Tumor_G2 |
| 9829 | NDUFA8   | 6.794888125 | Tumor_G2 |
| 9830 | NDUFB1   | 5.537784269 | Tumor_G2 |
| 9831 | NDUFB10  | 7.214475138 | Tumor_G2 |
| 9832 | NDUFB2   | 5.810965021 | Tumor_G2 |
| 9833 | NDUFB3   | 5.93059832  | Tumor_G2 |
| 9834 | NDUFB7   | 8.205338461 | Tumor_G2 |
| 9835 | CYC1     | 6.315979906 | Tumor_G2 |
| 9836 | ETFB     | 4.72977788  | Tumor_G2 |
| 9837 | UQCR10   | 7.222344201 | Tumor_G2 |
| 9838 | UQCRQ    | 6.917255511 | Tumor_G2 |

|      |          |             |          |
|------|----------|-------------|----------|
| 9839 | UQCC3    | 4.393947219 | Tumor_G2 |
| 9840 | COX15    | 5.020481099 | Tumor_G2 |
| 9841 | COX5A    | 6.597815273 | Tumor_G2 |
| 9842 | COX6B1   | 8.077201437 | Tumor_G2 |
| 9843 | COX6C    | 5.991961331 | Tumor_G2 |
| 9844 | COX7A2   | 6.325430573 | Tumor_G2 |
| 9845 | COX7B    | 5.666490728 | Tumor_G2 |
| 9846 | COX8A    | 9.14816103  | Tumor_G2 |
| 9847 | SCO1     | 3.671002593 | Tumor_G2 |
| 9848 | SURF1    | 6.357099397 | Tumor_G2 |
| 9849 | ATP6V1E1 | 6.463252568 | Tumor_G2 |
| 9850 | DLAT     | 5.029070438 | Tumor_G2 |
| 9851 | PDC      | 0.249732949 | Tumor_G2 |
| 9852 | SUCLG2   | 5.994388756 | Tumor_G2 |
| 9853 | SLC25A5  | 7.591701717 | Tumor_G2 |
| 9854 | UCP2     | 8.263186476 | Tumor_G2 |
| 9855 | SOD2     | 4.831945184 | Tumor_G2 |
| 9856 | NOX4     | 3.540684565 | Tumor_G2 |
| 9857 | DUOX1    | 7.476602617 | Tumor_G2 |
| 9858 | DUOXA1   | 7.88294122  | Tumor_G2 |
| 9859 | DUOX2    | 8.323259907 | Tumor_G2 |
| 9860 | DUOXA2   | 5.7570979   | Tumor_G2 |
| 9861 | NDUFA1   | 8.322110013 | Tumor_G2 |
| 9862 | NDUFA2   | 7.141429201 | Tumor_G2 |
| 9863 | NDUFA8   | 7.228045176 | Tumor_G2 |
| 9864 | NDUFB1   | 6.063272565 | Tumor_G2 |
| 9865 | NDUFB10  | 7.681653881 | Tumor_G2 |
| 9866 | NDUFB2   | 7.045987059 | Tumor_G2 |
| 9867 | NDUFB3   | 6.567540959 | Tumor_G2 |
| 9868 | NDUFB7   | 8.971295188 | Tumor_G2 |
| 9869 | CYC1     | 6.837069438 | Tumor_G2 |
| 9870 | ETFB     | 5.260325467 | Tumor_G2 |
| 9871 | UQCR10   | 8.070255666 | Tumor_G2 |
| 9872 | UQCRQ    | 7.504541545 | Tumor_G2 |
| 9873 | UQCC3    | 4.627352267 | Tumor_G2 |
| 9874 | COX15    | 5.009088132 | Tumor_G2 |
| 9875 | COX5A    | 7.148547611 | Tumor_G2 |
| 9876 | COX6B1   | 8.901321085 | Tumor_G2 |
| 9877 | COX6C    | 6.639509074 | Tumor_G2 |
| 9878 | COX7A2   | 6.928039504 | Tumor_G2 |

|      |          |             |          |
|------|----------|-------------|----------|
| 9879 | COX7B    | 6.31481751  | Tumor_G2 |
| 9880 | COX8A    | 10.02430977 | Tumor_G2 |
| 9881 | SCO1     | 3.564706379 | Tumor_G2 |
| 9882 | SURF1    | 7.007485043 | Tumor_G2 |
| 9883 | ATP6V1E1 | 6.783841612 | Tumor_G2 |
| 9884 | DLAT     | 4.94421069  | Tumor_G2 |
| 9885 | PDC      | 0.30309827  | Tumor_G2 |
| 9886 | SUCLG2   | 6.100288543 | Tumor_G2 |
| 9887 | SLC25A5  | 7.870646285 | Tumor_G2 |
| 9888 | UCP2     | 8.527702281 | Tumor_G2 |
| 9889 | SOD2     | 5.485979194 | Tumor_G2 |
| 9890 | NOX4     | 1.466293748 | Tumor_G2 |
| 9891 | DUOX1    | 7.276666331 | Tumor_G2 |
| 9892 | DUOXA1   | 7.067242106 | Tumor_G2 |
| 9893 | DUOX2    | 8.279544596 | Tumor_G2 |
| 9894 | DUOXA2   | 6.156545199 | Tumor_G2 |
| 9895 | NDUFA1   | 8.206344925 | Tumor_G2 |
| 9896 | NDUFA2   | 7.447597754 | Tumor_G2 |
| 9897 | NDUFA8   | 6.389678456 | Tumor_G2 |
| 9898 | NDUFB1   | 5.955993045 | Tumor_G2 |
| 9899 | NDUFB10  | 7.864303978 | Tumor_G2 |
| 9900 | NDUFB2   | 6.15295195  | Tumor_G2 |
| 9901 | NDUFB3   | 4.915426797 | Tumor_G2 |
| 9902 | NDUFB7   | 9.401186058 | Tumor_G2 |
| 9903 | CYC1     | 6.603853134 | Tumor_G2 |
| 9904 | ETFB     | 4.860813647 | Tumor_G2 |
| 9905 | UQCR10   | 7.284930921 | Tumor_G2 |
| 9906 | UQCRQ    | 7.289016808 | Tumor_G2 |
| 9907 | UQCC3    | 4.869472943 | Tumor_G2 |
| 9908 | COX15    | 4.857879244 | Tumor_G2 |
| 9909 | COX5A    | 6.547781076 | Tumor_G2 |
| 9910 | COX6B1   | 9.179841912 | Tumor_G2 |
| 9911 | COX6C    | 6.708513855 | Tumor_G2 |
| 9912 | COX7A2   | 6.383442045 | Tumor_G2 |
| 9913 | COX7B    | 5.523920941 | Tumor_G2 |
| 9914 | COX8A    | 9.415199322 | Tumor_G2 |
| 9915 | SCO1     | 2.554852572 | Tumor_G2 |
| 9916 | SURF1    | 6.434194865 | Tumor_G2 |
| 9917 | ATP6V1E1 | 5.279112603 | Tumor_G2 |
| 9918 | DLAT     | 3.172681615 | Tumor_G2 |



|      |          |             |          |
|------|----------|-------------|----------|
| 9919 | PDC      | 0.236119435 | Tumor_G2 |
| 9920 | SUCLG2   | 4.962551577 | Tumor_G2 |
| 9921 | SLC25A5  | 6.355818937 | Tumor_G2 |
| 9922 | UCP2     | 6.711832902 | Tumor_G2 |
| 9923 | SOD2     | 3.200335471 | Tumor_G2 |
| 9924 | NOX4     | 0.385109849 | Tumor_G2 |
| 9925 | DUOX1    | 7.543673707 | Tumor_G2 |
| 9926 | DUOXA1   | 7.405077631 | Tumor_G2 |
| 9927 | DUOX2    | 7.484620385 | Tumor_G2 |
| 9928 | DUOXA2   | 5.565743979 | Tumor_G2 |
| 9929 | NDUFA1   | 7.789704909 | Tumor_G2 |
| 9930 | NDUFA2   | 7.320088084 | Tumor_G2 |
| 9931 | NDUFA8   | 7.622864483 | Tumor_G2 |
| 9932 | NDUFB1   | 5.91087548  | Tumor_G2 |
| 9933 | NDUFB10  | 7.751293791 | Tumor_G2 |
| 9934 | NDUFB2   | 6.636931739 | Tumor_G2 |
| 9935 | NDUFB3   | 6.166025527 | Tumor_G2 |
| 9936 | NDUFB7   | 8.746597452 | Tumor_G2 |
| 9937 | CYC1     | 6.768028622 | Tumor_G2 |
| 9938 | ETFB     | 5.282845314 | Tumor_G2 |
| 9939 | UQCR10   | 6.799108095 | Tumor_G2 |
| 9940 | UQCRQ    | 7.86070399  | Tumor_G2 |
| 9941 | UQCC3    | 4.644859983 | Tumor_G2 |
| 9942 | COX15    | 4.731219929 | Tumor_G2 |
| 9943 | COX5A    | 7.045579799 | Tumor_G2 |
| 9944 | COX6B1   | 8.708974396 | Tumor_G2 |
| 9945 | COX6C    | 6.387275572 | Tumor_G2 |
| 9946 | COX7A2   | 6.850633889 | Tumor_G2 |
| 9947 | COX7B    | 5.997677651 | Tumor_G2 |
| 9948 | COX8A    | 9.390539016 | Tumor_G2 |
| 9949 | SCO1     | 3.308855374 | Tumor_G2 |
| 9950 | SURF1    | 6.720642317 | Tumor_G2 |
| 9951 | ATP6V1E1 | 6.353475803 | Tumor_G2 |
| 9952 | DLAT     | 4.826260996 | Tumor_G2 |
| 9953 | PDC      | 0.194106018 | Tumor_G2 |
| 9954 | SUCLG2   | 6.102033822 | Tumor_G2 |
| 9955 | SLC25A5  | 7.935639969 | Tumor_G2 |
| 9956 | UCP2     | 8.576024994 | Tumor_G2 |
| 9957 | SOD2     | 4.70571676  | Tumor_G2 |
| 9958 | NOX4     | 2.383431493 | Tumor_G2 |

|      |          |             |          |
|------|----------|-------------|----------|
| 9959 | DUOX1    | 6.562551659 | Tumor_G2 |
| 9960 | DUOXA1   | 6.87608983  | Tumor_G2 |
| 9961 | DUOX2    | 8.063048363 | Tumor_G2 |
| 9962 | DUOXA2   | 5.771028264 | Tumor_G2 |
| 9963 | NDUFA1   | 8.135677463 | Tumor_G2 |
| 9964 | NDUFA2   | 6.871010156 | Tumor_G2 |
| 9965 | NDUFA8   | 7.34336206  | Tumor_G2 |
| 9966 | NDUFB1   | 6.224863441 | Tumor_G2 |
| 9967 | NDUFB10  | 7.708497942 | Tumor_G2 |
| 9968 | NDUFB2   | 6.571902432 | Tumor_G2 |
| 9969 | NDUFB3   | 6.038414446 | Tumor_G2 |
| 9970 | NDUFB7   | 8.801580969 | Tumor_G2 |
| 9971 | CYC1     | 6.738322999 | Tumor_G2 |
| 9972 | ETFB     | 4.886036265 | Tumor_G2 |
| 9973 | UQCR10   | 7.52775971  | Tumor_G2 |
| 9974 | UQCRQ    | 7.500681245 | Tumor_G2 |
| 9975 | UQCC3    | 4.405409961 | Tumor_G2 |
| 9976 | COX15    | 4.46622842  | Tumor_G2 |
| 9977 | COX5A    | 6.918240313 | Tumor_G2 |
| 9978 | COX6B1   | 8.880871312 | Tumor_G2 |
| 9979 | COX6C    | 6.824377218 | Tumor_G2 |
| 9980 | COX7A2   | 6.82089824  | Tumor_G2 |
| 9981 | COX7B    | 6.289631571 | Tumor_G2 |
| 9982 | COX8A    | 9.486524494 | Tumor_G2 |
| 9983 | SCO1     | 3.1616881   | Tumor_G2 |
| 9984 | SURF1    | 6.352842826 | Tumor_G2 |
| 9985 | ATP6V1E1 | 6.555855562 | Tumor_G2 |
| 9986 | DLAT     | 4.557983961 | Tumor_G2 |
| 9987 | PDC      | 0.178533264 | Tumor_G2 |
| 9988 | SUCLG2   | 5.831433683 | Tumor_G2 |
| 9989 | SLC25A5  | 7.757764045 | Tumor_G2 |
| 9990 | UCP2     | 7.304817722 | Tumor_G2 |
| 9991 | SOD2     | 4.613164625 | Tumor_G2 |
| 9992 | NOX4     | 2.612194185 | Tumor_G2 |
| 9993 | DUOX1    | 7.425029593 | Tumor_G2 |
| 9994 | DUOXA1   | 7.190963849 | Tumor_G2 |
| 9995 | DUOX2    | 7.971738672 | Tumor_G2 |
| 9996 | DUOXA2   | 6.602724628 | Tumor_G2 |
| 9997 | NDUFA1   | 7.893667046 | Tumor_G2 |
| 9998 | NDUFA2   | 7.002940296 | Tumor_G2 |

|       |          |             |          |
|-------|----------|-------------|----------|
| 9999  | NDUFA8   | 7.114340842 | Tumor_G2 |
| 10000 | NDUFB1   | 5.67769211  | Tumor_G2 |
| 10001 | NDUFB10  | 7.799144614 | Tumor_G2 |
| 10002 | NDUFB2   | 6.506106302 | Tumor_G2 |
| 10003 | NDUFB3   | 6.214524928 | Tumor_G2 |
| 10004 | NDUFB7   | 8.793913991 | Tumor_G2 |
| 10005 | CYC1     | 6.777061619 | Tumor_G2 |
| 10006 | ETFB     | 5.147660265 | Tumor_G2 |
| 10007 | UQCR10   | 7.772285298 | Tumor_G2 |
| 10008 | UQCRQ    | 7.534997353 | Tumor_G2 |
| 10009 | UQCC3    | 4.650662174 | Tumor_G2 |
| 10010 | COX15    | 4.498086933 | Tumor_G2 |
| 10011 | COX5A    | 7.172614429 | Tumor_G2 |
| 10012 | COX6B1   | 8.823253555 | Tumor_G2 |
| 10013 | COX6C    | 6.368554153 | Tumor_G2 |
| 10014 | COX7A2   | 6.999752244 | Tumor_G2 |
| 10015 | COX7B    | 6.001007589 | Tumor_G2 |
| 10016 | COX8A    | 9.400254978 | Tumor_G2 |
| 10017 | SCO1     | 3.054858731 | Tumor_G2 |
| 10018 | SURF1    | 6.67179011  | Tumor_G2 |
| 10019 | ATP6V1E1 | 7.369623175 | Tumor_G2 |
| 10020 | DLAT     | 4.830424339 | Tumor_G2 |
| 10021 | PDC      | 0.120461763 | Tumor_G2 |
| 10022 | SUCLG2   | 5.99189648  | Tumor_G2 |
| 10023 | SLC25A5  | 7.694389982 | Tumor_G2 |
| 10024 | UCP2     | 8.259027732 | Tumor_G2 |
| 10025 | SOD2     | 5.089649108 | Tumor_G2 |
| 10026 | NOX4     | 2.80468119  | Tumor_G2 |
| 10027 | DUOX1    | 5.548352089 | Tumor_G2 |
| 10028 | DUOXA1   | 6.03230174  | Tumor_G2 |
| 10029 | DUOX2    | 5.336054939 | Tumor_G2 |
| 10030 | DUOXA2   | 4.391068688 | Tumor_G2 |
| 10031 | NDUFA1   | 7.669892067 | Tumor_G2 |
| 10032 | NDUFA2   | 6.29721308  | Tumor_G2 |
| 10033 | NDUFA8   | 6.775896207 | Tumor_G2 |
| 10034 | NDUFB1   | 5.264332416 | Tumor_G2 |
| 10035 | NDUFB10  | 7.352379527 | Tumor_G2 |
| 10036 | NDUFB2   | 6.099764814 | Tumor_G2 |
| 10037 | NDUFB3   | 5.862310418 | Tumor_G2 |
| 10038 | NDUFB7   | 8.38459296  | Tumor_G2 |

|       |          |             |          |
|-------|----------|-------------|----------|
| 10039 | CYC1     | 6.808335561 | Tumor_G2 |
| 10040 | ETFB     | 5.228266618 | Tumor_G2 |
| 10041 | UQCR10   | 6.7228503   | Tumor_G2 |
| 10042 | UQCRQ    | 6.67867859  | Tumor_G2 |
| 10043 | UQCC3    | 4.399981279 | Tumor_G2 |
| 10044 | COX15    | 5.56818714  | Tumor_G2 |
| 10045 | COX5A    | 6.636350742 | Tumor_G2 |
| 10046 | COX6B1   | 8.106328985 | Tumor_G2 |
| 10047 | COX6C    | 5.994396887 | Tumor_G2 |
| 10048 | COX7A2   | 6.2327631   | Tumor_G2 |
| 10049 | COX7B    | 5.683767191 | Tumor_G2 |
| 10050 | COX8A    | 9.441580003 | Tumor_G2 |
| 10051 | SCO1     | 3.784776915 | Tumor_G2 |
| 10052 | SURF1    | 6.22624651  | Tumor_G2 |
| 10053 | ATP6V1E1 | 6.338204915 | Tumor_G2 |
| 10054 | DLAT     | 5.47422947  | Tumor_G2 |
| 10055 | PDC      | 0.469877082 | Tumor_G2 |
| 10056 | SUCLG2   | 6.383816973 | Tumor_G2 |
| 10057 | SLC25A5  | 7.609456288 | Tumor_G2 |
| 10058 | UCP2     | 8.601504751 | Tumor_G2 |
| 10059 | SOD2     | 4.784127865 | Tumor_G2 |
| 10060 | NOX4     | 1.943732276 | Tumor_G2 |
| 10061 | DUOX1    | 7.867823897 | Tumor_G2 |
| 10062 | DUOXA1   | 7.816063275 | Tumor_G2 |
| 10063 | DUOX2    | 9.56979456  | Tumor_G2 |
| 10064 | DUOXA2   | 6.597381126 | Tumor_G2 |
| 10065 | NDUFA1   | 7.804977325 | Tumor_G2 |
| 10066 | NDUFA2   | 6.709173614 | Tumor_G2 |
| 10067 | NDUFA8   | 6.817964355 | Tumor_G2 |
| 10068 | NDUFB1   | 5.338531795 | Tumor_G2 |
| 10069 | NDUFB10  | 7.409245203 | Tumor_G2 |
| 10070 | NDUFB2   | 6.201593094 | Tumor_G2 |
| 10071 | NDUFB3   | 6.093133313 | Tumor_G2 |
| 10072 | NDUFB7   | 8.493929243 | Tumor_G2 |
| 10073 | CYC1     | 6.406645827 | Tumor_G2 |
| 10074 | ETFB     | 4.955194628 | Tumor_G2 |
| 10075 | UQCR10   | 7.551339678 | Tumor_G2 |
| 10076 | UQCRQ    | 7.145025664 | Tumor_G2 |
| 10077 | UQCC3    | 4.393938586 | Tumor_G2 |
| 10078 | COX15    | 4.931784662 | Tumor_G2 |

|       |          |             |          |
|-------|----------|-------------|----------|
| 10079 | COX5A    | 6.836914012 | Tumor_G2 |
| 10080 | COX6B1   | 8.559763547 | Tumor_G2 |
| 10081 | COX6C    | 6.209418373 | Tumor_G2 |
| 10082 | COX7A2   | 6.594936312 | Tumor_G2 |
| 10083 | COX7B    | 5.903074832 | Tumor_G2 |
| 10084 | COX8A    | 9.083374385 | Tumor_G2 |
| 10085 | SCO1     | 3.239198332 | Tumor_G2 |
| 10086 | SURF1    | 6.396162099 | Tumor_G2 |
| 10087 | ATP6V1E1 | 6.99936709  | Tumor_G2 |
| 10088 | DLAT     | 5.442256998 | Tumor_G2 |
| 10089 | PDC      | 0.296789837 | Tumor_G2 |
| 10090 | SUCLG2   | 6.201429825 | Tumor_G2 |
| 10091 | SLC25A5  | 7.636770552 | Tumor_G2 |
| 10092 | UCP2     | 9.175590275 | Tumor_G2 |
| 10093 | SOD2     | 5.494684569 | Tumor_G2 |
| 10094 | NOX4     | 3.274927655 | Tumor_G2 |
| 10095 | DUOX1    | 6.370355747 | Tumor_G2 |
| 10096 | DUOXA1   | 6.406890386 | Tumor_G2 |
| 10097 | DUOX2    | 7.345479911 | Tumor_G2 |
| 10098 | DUOXA2   | 5.38247979  | Tumor_G2 |
| 10099 | NDUFA1   | 7.76765064  | Tumor_G2 |
| 10100 | NDUFA2   | 6.204910531 | Tumor_G2 |
| 10101 | NDUFA8   | 6.917787419 | Tumor_G2 |
| 10102 | NDUFB1   | 5.321714231 | Tumor_G2 |
| 10103 | NDUFB10  | 7.479683338 | Tumor_G2 |
| 10104 | NDUFB2   | 6.496671465 | Tumor_G2 |
| 10105 | NDUFB3   | 6.104023777 | Tumor_G2 |
| 10106 | NDUFB7   | 8.561503275 | Tumor_G2 |
| 10107 | CYC1     | 7.064910259 | Tumor_G2 |
| 10108 | ETFB     | 5.201108912 | Tumor_G2 |
| 10109 | UQCR10   | 7.496091882 | Tumor_G2 |
| 10110 | UQCRQ    | 6.876007802 | Tumor_G2 |
| 10111 | UQCC3    | 4.327520831 | Tumor_G2 |
| 10112 | COX15    | 5.545764471 | Tumor_G2 |
| 10113 | COX5A    | 6.889688314 | Tumor_G2 |
| 10114 | COX6B1   | 8.327480799 | Tumor_G2 |
| 10115 | COX6C    | 6.110721687 | Tumor_G2 |
| 10116 | COX7A2   | 6.565373279 | Tumor_G2 |
| 10117 | COX7B    | 5.970989857 | Tumor_G2 |
| 10118 | COX8A    | 9.542608542 | Tumor_G2 |

|       |          |             |          |
|-------|----------|-------------|----------|
| 10119 | SCO1     | 3.718544645 | Tumor_G2 |
| 10120 | SURF1    | 6.645802093 | Tumor_G2 |
| 10121 | ATP6V1E1 | 7.11301052  | Tumor_G2 |
| 10122 | DLAT     | 5.352484821 | Tumor_G2 |
| 10123 | PDC      | 0.107184568 | Tumor_G2 |
| 10124 | SUCLG2   | 6.441683233 | Tumor_G2 |
| 10125 | SLC25A5  | 7.879733262 | Tumor_G2 |
| 10126 | UCP2     | 10.17720308 | Tumor_G2 |
| 10127 | SOD2     | 4.91722427  | Tumor_G2 |
| 10128 | NOX4     | 1.378998069 | Tumor_G2 |
| 10129 | DUOX1    | 7.691133926 | Tumor_G2 |
| 10130 | DUOXA1   | 7.471076988 | Tumor_G2 |
| 10131 | DUOX2    | 8.504822979 | Tumor_G2 |
| 10132 | DUOXA2   | 6.013533484 | Tumor_G2 |
| 10133 | NDUFA1   | 8.606557408 | Tumor_G2 |
| 10134 | NDUFA2   | 7.056940371 | Tumor_G2 |
| 10135 | NDUFA8   | 7.510887498 | Tumor_G2 |
| 10136 | NDUFB1   | 6.005939806 | Tumor_G2 |
| 10137 | NDUFB10  | 7.733994714 | Tumor_G2 |
| 10138 | NDUFB2   | 7.653393849 | Tumor_G2 |
| 10139 | NDUFB3   | 6.757807741 | Tumor_G2 |
| 10140 | NDUFB7   | 9.073527098 | Tumor_G2 |
| 10141 | CYC1     | 7.581862228 | Tumor_G2 |
| 10142 | ETFB     | 5.046592285 | Tumor_G2 |
| 10143 | UQCR10   | 7.935630554 | Tumor_G2 |
| 10144 | UQCRQ    | 7.658000748 | Tumor_G2 |
| 10145 | UQCC3    | 4.523229466 | Tumor_G2 |
| 10146 | COX15    | 5.207864086 | Tumor_G2 |
| 10147 | COX5A    | 7.623959789 | Tumor_G2 |
| 10148 | COX6B1   | 8.797273908 | Tumor_G2 |
| 10149 | COX6C    | 7.102200103 | Tumor_G2 |
| 10150 | COX7A2   | 7.408122859 | Tumor_G2 |
| 10151 | COX7B    | 6.763311119 | Tumor_G2 |
| 10152 | COX8A    | 10.19053156 | Tumor_G2 |
| 10153 | SCO1     | 3.642542642 | Tumor_G2 |
| 10154 | SURF1    | 6.723232208 | Tumor_G2 |
| 10155 | ATP6V1E1 | 7.28790652  | Tumor_G2 |
| 10156 | DLAT     | 5.240664817 | Tumor_G2 |
| 10157 | PDC      | 0.090132829 | Tumor_G2 |
| 10158 | SUCLG2   | 6.904973535 | Tumor_G2 |

|       |          |             |          |
|-------|----------|-------------|----------|
| 10159 | SLC25A5  | 9.162836757 | Tumor_G2 |
| 10160 | UCP2     | 7.149930664 | Tumor_G2 |
| 10161 | SOD2     | 4.941144455 | Tumor_G2 |
| 10162 | NOX4     | 1.281086098 | Tumor_G2 |
| 10163 | DUOX1    | 6.638032993 | Tumor_G2 |
| 10164 | DUOXA1   | 5.99835041  | Tumor_G2 |
| 10165 | DUOX2    | 8.01445226  | Tumor_G2 |
| 10166 | DUOXA2   | 6.253374628 | Tumor_G2 |
| 10167 | NDUFA1   | 8.082949665 | Tumor_G2 |
| 10168 | NDUFA2   | 6.526099461 | Tumor_G2 |
| 10169 | NDUFA8   | 7.79869511  | Tumor_G2 |
| 10170 | NDUFB1   | 5.656857996 | Tumor_G2 |
| 10171 | NDUFB10  | 7.855350483 | Tumor_G2 |
| 10172 | NDUFB2   | 7.049887123 | Tumor_G2 |
| 10173 | NDUFB3   | 6.679396738 | Tumor_G2 |
| 10174 | NDUFB7   | 8.860040287 | Tumor_G2 |
| 10175 | CYC1     | 8.362846204 | Tumor_G2 |
| 10176 | ETFB     | 5.055449003 | Tumor_G2 |
| 10177 | UQCR10   | 7.870940648 | Tumor_G2 |
| 10178 | UQCRQ    | 7.030179561 | Tumor_G2 |
| 10179 | UQCC3    | 4.362381361 | Tumor_G2 |
| 10180 | COX15    | 5.324775023 | Tumor_G2 |
| 10181 | COX5A    | 8.157952696 | Tumor_G2 |
| 10182 | COX6B1   | 9.051058558 | Tumor_G2 |
| 10183 | COX6C    | 7.048138108 | Tumor_G2 |
| 10184 | COX7A2   | 7.051615858 | Tumor_G2 |
| 10185 | COX7B    | 7.160708278 | Tumor_G2 |
| 10186 | COX8A    | 10.46155601 | Tumor_G2 |
| 10187 | SCO1     | 3.784138046 | Tumor_G2 |
| 10188 | SURF1    | 6.491035777 | Tumor_G2 |
| 10189 | ATP6V1E1 | 6.92498378  | Tumor_G2 |
| 10190 | DLAT     | 5.446751344 | Tumor_G2 |
| 10191 | PDC      | 0.113798646 | Tumor_G2 |
| 10192 | SUCLG2   | 6.783011112 | Tumor_G2 |
| 10193 | SLC25A5  | 9.791893552 | Tumor_G2 |
| 10194 | UCP2     | 5.545953114 | Tumor_G2 |
| 10195 | SOD2     | 5.377081691 | Tumor_G2 |
| 10196 | NOX4     | 0.512635916 | Tumor_G2 |
| 10197 | DUOX1    | 5.71147648  | Tumor_G2 |
| 10198 | DUOXA1   | 5.113111222 | Tumor_G2 |

|       |          |             |          |
|-------|----------|-------------|----------|
| 10199 | DUOX2    | 5.465956833 | Tumor_G2 |
| 10200 | DUOXA2   | 3.680176441 | Tumor_G2 |
| 10201 | NDUFA1   | 8.627805414 | Tumor_G2 |
| 10202 | NDUFA2   | 6.545263873 | Tumor_G2 |
| 10203 | NDUFA8   | 7.133730073 | Tumor_G2 |
| 10204 | NDUFB1   | 5.939217117 | Tumor_G2 |
| 10205 | NDUFB10  | 7.959496723 | Tumor_G2 |
| 10206 | NDUFB2   | 6.637546828 | Tumor_G2 |
| 10207 | NDUFB3   | 6.85945316  | Tumor_G2 |
| 10208 | NDUFB7   | 8.605560338 | Tumor_G2 |
| 10209 | CYC1     | 8.647938635 | Tumor_G2 |
| 10210 | ETFB     | 4.447938205 | Tumor_G2 |
| 10211 | UQCR10   | 8.359684421 | Tumor_G2 |
| 10212 | UQCRQ    | 7.623016088 | Tumor_G2 |
| 10213 | UQCC3    | 4.089731384 | Tumor_G2 |
| 10214 | COX15    | 5.318777315 | Tumor_G2 |
| 10215 | COX5A    | 8.795497536 | Tumor_G2 |
| 10216 | COX6B1   | 9.081663221 | Tumor_G2 |
| 10217 | COX6C    | 7.416568653 | Tumor_G2 |
| 10218 | COX7A2   | 7.598344618 | Tumor_G2 |
| 10219 | COX7B    | 7.570808673 | Tumor_G2 |
| 10220 | COX8A    | 10.57891562 | Tumor_G2 |
| 10221 | SCO1     | 3.070227243 | Tumor_G2 |
| 10222 | SURF1    | 5.210591046 | Tumor_G2 |
| 10223 | ATP6V1E1 | 6.233996551 | Tumor_G2 |
| 10224 | DLAT     | 5.971782382 | Tumor_G2 |
| 10225 | PDC      | 0           | Tumor_G2 |
| 10226 | SUCLG2   | 6.491203752 | Tumor_G2 |
| 10227 | SLC25A5  | 10.61195812 | Tumor_G2 |
| 10228 | UCP2     | 3.215634247 | Tumor_G2 |
| 10229 | SOD2     | 5.121312494 | Tumor_G2 |
| 10230 | NOX4     | 0.293249235 | Tumor_G2 |
| 10231 | DUOX1    | 5.036630432 | Tumor_G2 |
| 10232 | DUOXA1   | 3.379245931 | Tumor_G2 |
| 10233 | DUOX2    | 3.529178226 | Tumor_G2 |
| 10234 | DUOXA2   | 1.558879376 | Tumor_G2 |
| 10235 | NDUFA1   | 8.566426931 | Tumor_G2 |
| 10236 | NDUFA2   | 7.051944311 | Tumor_G2 |
| 10237 | NDUFA8   | 6.706719314 | Tumor_G2 |
| 10238 | NDUFB1   | 5.006427438 | Tumor_G2 |



|       |          |             |          |
|-------|----------|-------------|----------|
| 10239 | NDUFB10  | 6.997158182 | Tumor_G2 |
| 10240 | NDUFB2   | 7.278105142 | Tumor_G2 |
| 10241 | NDUFB3   | 5.832278286 | Tumor_G2 |
| 10242 | NDUFB7   | 8.931797299 | Tumor_G2 |
| 10243 | CYC1     | 7.099393771 | Tumor_G2 |
| 10244 | ETFB     | 4.740515857 | Tumor_G2 |
| 10245 | UQCR10   | 7.049524167 | Tumor_G2 |
| 10246 | UQCRQ    | 7.242241089 | Tumor_G2 |
| 10247 | UQCC3    | 4.904520965 | Tumor_G2 |
| 10248 | COX15    | 5.061828311 | Tumor_G2 |
| 10249 | COX5A    | 7.423559437 | Tumor_G2 |
| 10250 | COX6B1   | 8.661460321 | Tumor_G2 |
| 10251 | COX6C    | 6.268209622 | Tumor_G2 |
| 10252 | COX7A2   | 6.518757041 | Tumor_G2 |
| 10253 | COX7B    | 6.724247867 | Tumor_G2 |
| 10254 | COX8A    | 9.897606701 | Tumor_G2 |
| 10255 | SCO1     | 3.640055444 | Tumor_G2 |
| 10256 | SURF1    | 5.335682509 | Tumor_G2 |
| 10257 | ATP6V1E1 | 6.533957808 | Tumor_G2 |
| 10258 | DLAT     | 5.244238144 | Tumor_G2 |
| 10259 | PDC      | 0           | Tumor_G2 |
| 10260 | SUCLG2   | 5.719755295 | Tumor_G2 |
| 10261 | SLC25A5  | 10.09950482 | Tumor_G2 |
| 10262 | UCP2     | 6.326680185 | Tumor_G2 |
| 10263 | SOD2     | 4.626209629 | Tumor_G2 |
| 10264 | NOX4     | 0.546335453 | Tumor_G2 |
| 10265 | DUOX1    | 5.659164406 | Tumor_G2 |
| 10266 | DUOXA1   | 4.905504429 | Tumor_G2 |
| 10267 | DUOX2    | 7.329813323 | Tumor_G2 |
| 10268 | DUOXA2   | 6.460111431 | Tumor_G2 |
| 10269 | NDUFA1   | 7.960976841 | Tumor_G2 |
| 10270 | NDUFA2   | 7.037855259 | Tumor_G2 |
| 10271 | NDUFA8   | 7.483663031 | Tumor_G2 |
| 10272 | NDUFB1   | 6.026353821 | Tumor_G2 |
| 10273 | NDUFB10  | 7.818382248 | Tumor_G2 |
| 10274 | NDUFB2   | 7.157733414 | Tumor_G2 |
| 10275 | NDUFB3   | 6.550080069 | Tumor_G2 |
| 10276 | NDUFB7   | 8.614209886 | Tumor_G2 |
| 10277 | CYC1     | 6.971867483 | Tumor_G2 |
| 10278 | ETFB     | 5.25255589  | Tumor_G2 |

|       |          |             |          |
|-------|----------|-------------|----------|
| 10279 | UQCR10   | 7.573912905 | Tumor_G2 |
| 10280 | UQCRQ    | 7.355208114 | Tumor_G2 |
| 10281 | UQCC3    | 4.155392525 | Tumor_G2 |
| 10282 | COX15    | 5.358692969 | Tumor_G2 |
| 10283 | COX5A    | 6.909790474 | Tumor_G2 |
| 10284 | COX6B1   | 8.33203922  | Tumor_G2 |
| 10285 | COX6C    | 6.518754721 | Tumor_G2 |
| 10286 | COX7A2   | 6.873966905 | Tumor_G2 |
| 10287 | COX7B    | 6.04673282  | Tumor_G2 |
| 10288 | COX8A    | 9.717533012 | Tumor_G2 |
| 10289 | SCO1     | 4.393888881 | Tumor_G2 |
| 10290 | SURF1    | 7.14658199  | Tumor_G2 |
| 10291 | ATP6V1E1 | 6.514995619 | Tumor_G2 |
| 10292 | DLAT     | 5.290764704 | Tumor_G2 |
| 10293 | PDC      | 0.068013753 | Tumor_G2 |
| 10294 | SUCLG2   | 6.132906975 | Tumor_G2 |
| 10295 | SLC25A5  | 8.148769925 | Tumor_G2 |
| 10296 | UCP2     | 6.100810645 | Tumor_G2 |
| 10297 | SOD2     | 4.673948127 | Tumor_G2 |
| 10298 | NOX4     | 2.226291163 | Tumor_G2 |
| 10299 | DUOX1    | 6.39767707  | Tumor_G2 |
| 10300 | DUOXA1   | 6.073746276 | Tumor_G2 |
| 10301 | DUOX2    | 7.569461079 | Tumor_G2 |
| 10302 | DUOXA2   | 6.740994049 | Tumor_G2 |
| 10303 | NDUFA1   | 8.182181758 | Tumor_G2 |
| 10304 | NDUFA2   | 6.379015869 | Tumor_G2 |
| 10305 | NDUFA8   | 7.595273457 | Tumor_G2 |
| 10306 | NDUFB1   | 5.858588544 | Tumor_G2 |
| 10307 | NDUFB10  | 7.435314298 | Tumor_G2 |
| 10308 | NDUFB2   | 6.837097891 | Tumor_G2 |
| 10309 | NDUFB3   | 6.633758293 | Tumor_G2 |
| 10310 | NDUFB7   | 8.440612678 | Tumor_G2 |
| 10311 | CYC1     | 7.165253015 | Tumor_G2 |
| 10312 | ETFB     | 5.281717082 | Tumor_G2 |
| 10313 | UQCR10   | 7.68469479  | Tumor_G2 |
| 10314 | UQCRQ    | 7.294150885 | Tumor_G2 |
| 10315 | UQCC3    | 4.186989019 | Tumor_G2 |
| 10316 | COX15    | 5.28614518  | Tumor_G2 |
| 10317 | COX5A    | 7.583053675 | Tumor_G2 |
| 10318 | COX6B1   | 8.764004194 | Tumor_G2 |

|       |          |             |          |
|-------|----------|-------------|----------|
| 10319 | COX6C    | 6.775466619 | Tumor_G2 |
| 10320 | COX7A2   | 7.176595135 | Tumor_G2 |
| 10321 | COX7B    | 6.932649193 | Tumor_G2 |
| 10322 | COX8A    | 10.1342137  | Tumor_G2 |
| 10323 | SCO1     | 3.339351923 | Tumor_G2 |
| 10324 | SURF1    | 6.551180766 | Tumor_G2 |
| 10325 | ATP6V1E1 | 6.968317114 | Tumor_G2 |
| 10326 | DLAT     | 5.712213397 | Tumor_G2 |
| 10327 | PDC      | 0           | Tumor_G2 |
| 10328 | SUCLG2   | 7.164737962 | Tumor_G2 |
| 10329 | SLC25A5  | 8.719875945 | Tumor_G2 |
| 10330 | UCP2     | 5.01808403  | Tumor_G2 |
| 10331 | SOD2     | 4.764650782 | Tumor_G2 |
| 10332 | NOX4     | 0.922907611 | Tumor_G2 |
| 10333 | DUOX1    | 7.442510022 | Tumor_G2 |
| 10334 | DUOXA1   | 6.364756559 | Tumor_G2 |
| 10335 | DUOX2    | 8.671263118 | Tumor_G2 |
| 10336 | DUOXA2   | 6.108166007 | Tumor_G2 |
| 10337 | NDUFA1   | 8.505682498 | Tumor_G2 |
| 10338 | NDUFA2   | 6.909398043 | Tumor_G2 |
| 10339 | NDUFA8   | 7.637138477 | Tumor_G2 |
| 10340 | NDUFB1   | 6.272120303 | Tumor_G2 |
| 10341 | NDUFB10  | 7.741418001 | Tumor_G2 |
| 10342 | NDUFB2   | 6.713587986 | Tumor_G2 |
| 10343 | NDUFB3   | 6.643532173 | Tumor_G2 |
| 10344 | NDUFB7   | 8.68639983  | Tumor_G2 |
| 10345 | CYC1     | 7.037409993 | Tumor_G2 |
| 10346 | ETFB     | 5.743837088 | Tumor_G2 |
| 10347 | UQCR10   | 7.118633225 | Tumor_G2 |
| 10348 | UQCRQ    | 7.661391635 | Tumor_G2 |
| 10349 | UQCC3    | 4.725152996 | Tumor_G2 |
| 10350 | COX15    | 5.265427965 | Tumor_G2 |
| 10351 | COX5A    | 7.260253844 | Tumor_G2 |
| 10352 | COX6B1   | 8.878917264 | Tumor_G2 |
| 10353 | COX6C    | 6.819828219 | Tumor_G2 |
| 10354 | COX7A2   | 7.0436332   | Tumor_G2 |
| 10355 | COX7B    | 6.485678118 | Tumor_G2 |
| 10356 | COX8A    | 9.901031354 | Tumor_G2 |
| 10357 | SCO1     | 3.620410405 | Tumor_G2 |
| 10358 | SURF1    | 6.556271015 | Tumor_G2 |

|       |          |             |          |
|-------|----------|-------------|----------|
| 10359 | ATP6V1E1 | 7.254054368 | Tumor_G2 |
| 10360 | DLAT     | 5.209642562 | Tumor_G2 |
| 10361 | PDC      | 0.062585018 | Tumor_G2 |
| 10362 | SUCLG2   | 6.568167632 | Tumor_G2 |
| 10363 | SLC25A5  | 7.976572597 | Tumor_G2 |
| 10364 | UCP2     | 7.597766411 | Tumor_G2 |
| 10365 | SOD2     | 4.467646071 | Tumor_G2 |
| 10366 | NOX4     | 1.530690251 | Tumor_G2 |
| 10367 | DUOX1    | 9.247167993 | Tumor_G2 |
| 10368 | DUOXA1   | 8.665028992 | Tumor_G2 |
| 10369 | DUOX2    | 10.13103236 | Tumor_G2 |
| 10370 | DUOXA2   | 7.701317977 | Tumor_G2 |
| 10371 | NDUFA1   | 8.087161084 | Tumor_G2 |
| 10372 | NDUFA2   | 7.025356059 | Tumor_G2 |
| 10373 | NDUFA8   | 7.53959981  | Tumor_G2 |
| 10374 | NDUFB1   | 6.148060584 | Tumor_G2 |
| 10375 | NDUFB10  | 7.416864965 | Tumor_G2 |
| 10376 | NDUFB2   | 6.964021359 | Tumor_G2 |
| 10377 | NDUFB3   | 6.954623554 | Tumor_G2 |
| 10378 | NDUFB7   | 8.714938462 | Tumor_G2 |
| 10379 | CYC1     | 7.051332502 | Tumor_G2 |
| 10380 | ETFB     | 5.587681269 | Tumor_G2 |
| 10381 | UQCR10   | 7.03709038  | Tumor_G2 |
| 10382 | UQCRQ    | 7.758209944 | Tumor_G2 |
| 10383 | UQCC3    | 4.576951776 | Tumor_G2 |
| 10384 | COX15    | 5.434687338 | Tumor_G2 |
| 10385 | COX5A    | 7.160787917 | Tumor_G2 |
| 10386 | COX6B1   | 8.382497729 | Tumor_G2 |
| 10387 | COX6C    | 6.660477841 | Tumor_G2 |
| 10388 | COX7A2   | 7.143094535 | Tumor_G2 |
| 10389 | COX7B    | 6.446702154 | Tumor_G2 |
| 10390 | COX8A    | 9.844258994 | Tumor_G2 |
| 10391 | SCO1     | 4.476082748 | Tumor_G2 |
| 10392 | SURF1    | 6.817907419 | Tumor_G2 |
| 10393 | ATP6V1E1 | 6.330505868 | Tumor_G2 |
| 10394 | DLAT     | 5.496919885 | Tumor_G2 |
| 10395 | PDC      | 0.139186385 | Tumor_G2 |
| 10396 | SUCLG2   | 6.963790887 | Tumor_G2 |
| 10397 | SLC25A5  | 8.367427991 | Tumor_G2 |
| 10398 | UCP2     | 8.318272771 | Tumor_G2 |

|       |          |             |          |
|-------|----------|-------------|----------|
| 10399 | SOD2     | 4.360685928 | Tumor_G2 |
| 10400 | NOX4     | 1.204873566 | Tumor_G2 |
| 10401 | DUOX1    | 8.044359095 | Tumor_G2 |
| 10402 | DUOXA1   | 7.380899814 | Tumor_G2 |
| 10403 | DUOX2    | 10.16548747 | Tumor_G2 |
| 10404 | DUOXA2   | 7.654440618 | Tumor_G2 |
| 10405 | NDUFA1   | 8.285257579 | Tumor_G2 |
| 10406 | NDUFA2   | 6.855055571 | Tumor_G2 |
| 10407 | NDUFA8   | 7.100121577 | Tumor_G2 |
| 10408 | NDUFB1   | 5.728094707 | Tumor_G2 |
| 10409 | NDUFB10  | 7.593255781 | Tumor_G2 |
| 10410 | NDUFB2   | 6.659051266 | Tumor_G2 |
| 10411 | NDUFB3   | 5.622700889 | Tumor_G2 |
| 10412 | NDUFB7   | 8.571850349 | Tumor_G2 |
| 10413 | CYC1     | 7.21632286  | Tumor_G2 |
| 10414 | ETFB     | 5.171188804 | Tumor_G2 |
| 10415 | UQCR10   | 7.743657095 | Tumor_G2 |
| 10416 | UQCRQ    | 7.201012665 | Tumor_G2 |
| 10417 | UQCC3    | 3.44659033  | Tumor_G2 |
| 10418 | COX15    | 5.329063268 | Tumor_G2 |
| 10419 | COX5A    | 7.164676637 | Tumor_G2 |
| 10420 | COX6B1   | 8.430823883 | Tumor_G2 |
| 10421 | COX6C    | 6.57099164  | Tumor_G2 |
| 10422 | COX7A2   | 6.815895533 | Tumor_G2 |
| 10423 | COX7B    | 6.521109974 | Tumor_G2 |
| 10424 | COX8A    | 9.207997482 | Tumor_G2 |
| 10425 | SCO1     | 3.821193313 | Tumor_G2 |
| 10426 | SURF1    | 6.152363489 | Tumor_G2 |
| 10427 | ATP6V1E1 | 6.900053485 | Tumor_G2 |
| 10428 | DLAT     | 4.586035896 | Tumor_G2 |
| 10429 | PDC      | 0.085920101 | Tumor_G2 |
| 10430 | SUCLG2   | 5.756683738 | Tumor_G2 |
| 10431 | SLC25A5  | 8.756449174 | Tumor_G2 |
| 10432 | UCP2     | 5.682132113 | Tumor_G2 |
| 10433 | SOD2     | 4.331669723 | Tumor_G2 |
| 10434 | NOX4     | 0.773899487 | Tumor_G2 |
| 10435 | DUOX1    | 5.250248914 | Tumor_G2 |
| 10436 | DUOXA1   | 4.694940835 | Tumor_G2 |
| 10437 | DUOX2    | 6.336922684 | Tumor_G2 |
| 10438 | DUOXA2   | 5.167033993 | Tumor_G2 |

|       |          |             |          |
|-------|----------|-------------|----------|
| 10439 | NDUFA1   | 8.357985989 | Tumor_G2 |
| 10440 | NDUFA2   | 7.044152914 | Tumor_G2 |
| 10441 | NDUFA8   | 7.816202059 | Tumor_G2 |
| 10442 | NDUFB1   | 5.864356493 | Tumor_G2 |
| 10443 | NDUFB10  | 8.250427529 | Tumor_G2 |
| 10444 | NDUFB2   | 7.137741233 | Tumor_G2 |
| 10445 | NDUFB3   | 6.148273135 | Tumor_G2 |
| 10446 | NDUFB7   | 9.048377752 | Tumor_G2 |
| 10447 | CYC1     | 7.927147958 | Tumor_G2 |
| 10448 | ETFB     | 5.663791484 | Tumor_G2 |
| 10449 | UQCR10   | 8.082339106 | Tumor_G2 |
| 10450 | UQCRQ    | 7.62470575  | Tumor_G2 |
| 10451 | UQCC3    | 4.845596102 | Tumor_G2 |
| 10452 | COX15    | 5.33987013  | Tumor_G2 |
| 10453 | COX5A    | 7.908050544 | Tumor_G2 |
| 10454 | COX6B1   | 9.284704027 | Tumor_G2 |
| 10455 | COX6C    | 6.786969515 | Tumor_G2 |
| 10456 | COX7A2   | 7.114192968 | Tumor_G2 |
| 10457 | COX7B    | 6.818404991 | Tumor_G2 |
| 10458 | COX8A    | 10.48855336 | Tumor_G2 |
| 10459 | SCO1     | 3.658972034 | Tumor_G2 |
| 10460 | SURF1    | 6.4024581   | Tumor_G2 |
| 10461 | ATP6V1E1 | 7.467350012 | Tumor_G2 |
| 10462 | DLAT     | 5.136884068 | Tumor_G2 |
| 10463 | PDC      | 0.15642032  | Tumor_G2 |
| 10464 | SUCLG2   | 6.517504401 | Tumor_G2 |
| 10465 | SLC25A5  | 9.20239344  | Tumor_G2 |
| 10466 | UCP2     | 7.963218541 | Tumor_G2 |
| 10467 | SOD2     | 5.025229945 | Tumor_G2 |
| 10468 | NOX4     | 1.022419166 | Tumor_G2 |
| 10469 | DUOX1    | 6.507904978 | Tumor_G2 |
| 10470 | DUOXA1   | 6.612381838 | Tumor_G2 |
| 10471 | DUOX2    | 6.719009608 | Tumor_G2 |
| 10472 | DUOXA2   | 5.283356956 | Tumor_G2 |
| 10473 | NDUFA1   | 7.930513687 | Tumor_G2 |
| 10474 | NDUFA2   | 6.570494054 | Tumor_G2 |
| 10475 | NDUFA8   | 6.775428357 | Tumor_G2 |
| 10476 | NDUFB1   | 5.430626722 | Tumor_G2 |
| 10477 | NDUFB10  | 7.715803161 | Tumor_G2 |
| 10478 | NDUFB2   | 6.208469279 | Tumor_G2 |

|       |          |             |          |
|-------|----------|-------------|----------|
| 10479 | NDUFB3   | 6.132162103 | Tumor_G2 |
| 10480 | NDUFB7   | 8.200079943 | Tumor_G2 |
| 10481 | CYC1     | 6.79602144  | Tumor_G2 |
| 10482 | ETFB     | 5.206755936 | Tumor_G2 |
| 10483 | UQCR10   | 7.063439271 | Tumor_G2 |
| 10484 | UQCRQ    | 6.865180585 | Tumor_G2 |
| 10485 | UQCC3    | 4.537382705 | Tumor_G2 |
| 10486 | COX15    | 4.924381602 | Tumor_G2 |
| 10487 | COX5A    | 6.872046165 | Tumor_G2 |
| 10488 | COX6B1   | 8.647533483 | Tumor_G2 |
| 10489 | COX6C    | 6.155689142 | Tumor_G2 |
| 10490 | COX7A2   | 6.656572703 | Tumor_G2 |
| 10491 | COX7B    | 5.940291846 | Tumor_G2 |
| 10492 | COX8A    | 9.475732925 | Tumor_G2 |
| 10493 | SCO1     | 3.281517327 | Tumor_G2 |
| 10494 | SURF1    | 6.388271244 | Tumor_G2 |
| 10495 | ATP6V1E1 | 6.516080733 | Tumor_G2 |
| 10496 | DLAT     | 5.047118051 | Tumor_G2 |
| 10497 | PDC      | 0.059572395 | Tumor_G2 |
| 10498 | SUCLG2   | 6.062984921 | Tumor_G2 |
| 10499 | SLC25A5  | 8.123278273 | Tumor_G2 |
| 10500 | UCP2     | 9.114119656 | Tumor_G2 |
| 10501 | SOD2     | 5.31064931  | Tumor_G2 |
| 10502 | NOX4     | 3.485986396 | Tumor_G2 |
| 10503 | DUOX1    | 6.701503393 | Tumor_G2 |
| 10504 | DUOXA1   | 7.096434381 | Tumor_G2 |
| 10505 | DUOX2    | 7.526571391 | Tumor_G2 |
| 10506 | DUOXA2   | 5.247867126 | Tumor_G2 |
| 10507 | NDUFA1   | 8.317202263 | Tumor_G2 |
| 10508 | NDUFA2   | 7.500140471 | Tumor_G2 |
| 10509 | NDUFA8   | 7.67411294  | Tumor_G2 |
| 10510 | NDUFB1   | 5.996408088 | Tumor_G2 |
| 10511 | NDUFB10  | 7.946000734 | Tumor_G2 |
| 10512 | NDUFB2   | 8.074936976 | Tumor_G2 |
| 10513 | NDUFB3   | 6.645066292 | Tumor_G2 |
| 10514 | NDUFB7   | 9.403783598 | Tumor_G2 |
| 10515 | CYC1     | 7.433933347 | Tumor_G2 |
| 10516 | ETFB     | 5.570167601 | Tumor_G2 |
| 10517 | UQCR10   | 7.687673432 | Tumor_G2 |
| 10518 | UQCRQ    | 7.63021033  | Tumor_G2 |

|       |          |             |          |
|-------|----------|-------------|----------|
| 10519 | UQCC3    | 5.043474513 | Tumor_G2 |
| 10520 | COX15    | 5.385760169 | Tumor_G2 |
| 10521 | COX5A    | 7.184402222 | Tumor_G2 |
| 10522 | COX6B1   | 8.965936952 | Tumor_G2 |
| 10523 | COX6C    | 6.710223029 | Tumor_G2 |
| 10524 | COX7A2   | 7.021805967 | Tumor_G2 |
| 10525 | COX7B    | 6.43502871  | Tumor_G2 |
| 10526 | COX8A    | 10.51732225 | Tumor_G2 |
| 10527 | SCO1     | 3.817598889 | Tumor_G2 |
| 10528 | SURF1    | 7.59474986  | Tumor_G2 |
| 10529 | ATP6V1E1 | 6.29704613  | Tumor_G2 |
| 10530 | DLAT     | 5.1651178   | Tumor_G2 |
| 10531 | PDC      | 0           | Tumor_G2 |
| 10532 | SUCLG2   | 6.684842621 | Tumor_G2 |
| 10533 | SLC25A5  | 8.226826619 | Tumor_G2 |
| 10534 | UCP2     | 7.342456182 | Tumor_G2 |
| 10535 | SOD2     | 4.400535066 | Tumor_G2 |
| 10536 | NOX4     | 0.571647884 | Tumor_G2 |
| 10537 | DUOX1    | 6.835387272 | Tumor_G2 |
| 10538 | DUOXA1   | 6.847736333 | Tumor_G2 |
| 10539 | DUOX2    | 7.555460545 | Tumor_G2 |
| 10540 | DUOXA2   | 6.360853145 | Tumor_G2 |
| 10541 | NDUFA1   | 8.36145244  | Tumor_G2 |
| 10542 | NDUFA2   | 7.058183227 | Tumor_G2 |
| 10543 | NDUFA8   | 7.285691699 | Tumor_G2 |
| 10544 | NDUFB1   | 6.626073931 | Tumor_G2 |
| 10545 | NDUFB10  | 7.686357418 | Tumor_G2 |
| 10546 | NDUFB2   | 7.018929011 | Tumor_G2 |
| 10547 | NDUFB3   | 6.646795926 | Tumor_G2 |
| 10548 | NDUFB7   | 9.122643112 | Tumor_G2 |
| 10549 | CYC1     | 6.875847449 | Tumor_G2 |
| 10550 | ETFB     | 5.586626922 | Tumor_G2 |
| 10551 | UQCR10   | 7.909009987 | Tumor_G2 |
| 10552 | UQCRQ    | 7.791422565 | Tumor_G2 |
| 10553 | UQCC3    | 4.883575573 | Tumor_G2 |
| 10554 | COX15    | 4.900253644 | Tumor_G2 |
| 10555 | COX5A    | 7.330042257 | Tumor_G2 |
| 10556 | COX6B1   | 8.904931841 | Tumor_G2 |
| 10557 | COX6C    | 6.971275383 | Tumor_G2 |
| 10558 | COX7A2   | 7.154277413 | Tumor_G2 |



|       |          |             |          |
|-------|----------|-------------|----------|
| 10559 | COX7B    | 6.590731237 | Tumor_G2 |
| 10560 | COX8A    | 9.925465108 | Tumor_G2 |
| 10561 | SCO1     | 3.320826736 | Tumor_G2 |
| 10562 | SURF1    | 6.964169242 | Tumor_G2 |
| 10563 | ATP6V1E1 | 6.686660743 | Tumor_G2 |
| 10564 | DLAT     | 4.999701113 | Tumor_G2 |
| 10565 | PDC      | 0.124853928 | Tumor_G2 |
| 10566 | SUCLG2   | 6.198284921 | Tumor_G2 |
| 10567 | SLC25A5  | 7.933430092 | Tumor_G2 |
| 10568 | UCP2     | 7.654119945 | Tumor_G2 |
| 10569 | SOD2     | 4.314051024 | Tumor_G2 |
| 10570 | NOX4     | 1.910725139 | Tumor_G2 |
| 10571 | DUOX1    | 7.837820741 | Tumor_G2 |
| 10572 | DUOXA1   | 7.290832381 | Tumor_G2 |
| 10573 | DUOX2    | 9.916376415 | Tumor_G2 |
| 10574 | DUOXA2   | 7.922213975 | Tumor_G2 |
| 10575 | NDUFA1   | 7.904761238 | Tumor_G2 |
| 10576 | NDUFA2   | 6.718939129 | Tumor_G2 |
| 10577 | NDUFA8   | 7.129112919 | Tumor_G2 |
| 10578 | NDUFB1   | 5.560117092 | Tumor_G2 |
| 10579 | NDUFB10  | 7.193043728 | Tumor_G2 |
| 10580 | NDUFB2   | 6.423308945 | Tumor_G2 |
| 10581 | NDUFB3   | 6.348245326 | Tumor_G2 |
| 10582 | NDUFB7   | 8.317071395 | Tumor_G2 |
| 10583 | CYC1     | 6.54928026  | Tumor_G2 |
| 10584 | ETFB     | 4.908775174 | Tumor_G2 |
| 10585 | UQCR10   | 7.666580013 | Tumor_G2 |
| 10586 | UQCRQ    | 6.974625631 | Tumor_G2 |
| 10587 | UQCC3    | 4.247292454 | Tumor_G2 |
| 10588 | COX15    | 5.253093924 | Tumor_G2 |
| 10589 | COX5A    | 6.774595784 | Tumor_G2 |
| 10590 | COX6B1   | 8.295096339 | Tumor_G2 |
| 10591 | COX6C    | 6.261949238 | Tumor_G2 |
| 10592 | COX7A2   | 6.543640533 | Tumor_G2 |
| 10593 | COX7B    | 5.819265746 | Tumor_G2 |
| 10594 | COX8A    | 9.723966992 | Tumor_G2 |
| 10595 | SCO1     | 4.192096615 | Tumor_G2 |
| 10596 | SURF1    | 6.865887166 | Tumor_G2 |
| 10597 | ATP6V1E1 | 6.580091312 | Tumor_G2 |
| 10598 | DLAT     | 5.222381711 | Tumor_G2 |

|       |          |             |          |
|-------|----------|-------------|----------|
| 10599 | PDC      | 0.235879171 | Tumor_G2 |
| 10600 | SUCLG2   | 6.48531425  | Tumor_G2 |
| 10601 | SLC25A5  | 7.991366964 | Tumor_G2 |
| 10602 | UCP2     | 5.594486863 | Tumor_G2 |
| 10603 | SOD2     | 4.699761957 | Tumor_G2 |
| 10604 | NOX4     | 1.227824022 | Tumor_G2 |
| 10605 | DUOX1    | 7.604016832 | Tumor_G2 |
| 10606 | DUOXA1   | 6.687936295 | Tumor_G2 |
| 10607 | DUOX2    | 7.973511246 | Tumor_G2 |
| 10608 | DUOXA2   | 6.183253167 | Tumor_G2 |
| 10609 | NDUFA1   | 8.048710133 | Tumor_G2 |
| 10610 | NDUFA2   | 6.800241858 | Tumor_G2 |
| 10611 | NDUFA8   | 6.960602696 | Tumor_G2 |
| 10612 | NDUFB1   | 5.781317562 | Tumor_G2 |
| 10613 | NDUFB10  | 7.60363958  | Tumor_G2 |
| 10614 | NDUFB2   | 6.269117035 | Tumor_G2 |
| 10615 | NDUFB3   | 5.923229541 | Tumor_G2 |
| 10616 | NDUFB7   | 8.365037002 | Tumor_G2 |
| 10617 | CYC1     | 7.129990333 | Tumor_G2 |
| 10618 | ETFB     | 4.943218749 | Tumor_G2 |
| 10619 | UQCR10   | 6.75674453  | Tumor_G2 |
| 10620 | UQCRQ    | 7.299454973 | Tumor_G2 |
| 10621 | UQCC3    | 4.294669724 | Tumor_G2 |
| 10622 | COX15    | 4.540546032 | Tumor_G2 |
| 10623 | COX5A    | 7.384117704 | Tumor_G2 |
| 10624 | COX6B1   | 8.711938722 | Tumor_G2 |
| 10625 | COX6C    | 6.49306689  | Tumor_G2 |
| 10626 | COX7A2   | 6.759794137 | Tumor_G2 |
| 10627 | COX7B    | 6.133887676 | Tumor_G2 |
| 10628 | COX8A    | 9.95282626  | Tumor_G2 |
| 10629 | SCO1     | 2.853896963 | Tumor_G2 |
| 10630 | SURF1    | 6.025063187 | Tumor_G2 |
| 10631 | ATP6V1E1 | 6.015194854 | Tumor_G2 |
| 10632 | DLAT     | 4.728073835 | Tumor_G2 |
| 10633 | PDC      | 0.048433958 | Tumor_G2 |
| 10634 | SUCLG2   | 6.280593088 | Tumor_G2 |
| 10635 | SLC25A5  | 8.645202055 | Tumor_G2 |
| 10636 | UCP2     | 6.723350704 | Tumor_G2 |
| 10637 | SOD2     | 3.806441661 | Tumor_G2 |
| 10638 | NOX4     | 0.88551373  | Tumor_G2 |

|       |          |             |          |
|-------|----------|-------------|----------|
| 10639 | DUOX1    | 5.844560964 | Tumor_G2 |
| 10640 | DUOXA1   | 5.303028881 | Tumor_G2 |
| 10641 | DUOX2    | 9.550303474 | Tumor_G2 |
| 10642 | DUOXA2   | 6.887138653 | Tumor_G2 |
| 10643 | NDUFA1   | 7.937227925 | Tumor_G2 |
| 10644 | NDUFA2   | 7.347305928 | Tumor_G2 |
| 10645 | NDUFA8   | 7.33610292  | Tumor_G2 |
| 10646 | NDUFB1   | 5.842762642 | Tumor_G2 |
| 10647 | NDUFB10  | 7.943785309 | Tumor_G2 |
| 10648 | NDUFB2   | 6.099767886 | Tumor_G2 |
| 10649 | NDUFB3   | 5.313983329 | Tumor_G2 |
| 10650 | NDUFB7   | 9.249922762 | Tumor_G2 |
| 10651 | CYC1     | 7.102746926 | Tumor_G2 |
| 10652 | ETFB     | 5.001741693 | Tumor_G2 |
| 10653 | UQCR10   | 8.037094899 | Tumor_G2 |
| 10654 | UQCRQ    | 7.260463793 | Tumor_G2 |
| 10655 | UQCC3    | 5.158786494 | Tumor_G2 |
| 10656 | COX15    | 4.991806565 | Tumor_G2 |
| 10657 | COX5A    | 6.821335306 | Tumor_G2 |
| 10658 | COX6B1   | 9.466749336 | Tumor_G2 |
| 10659 | COX6C    | 6.757666757 | Tumor_G2 |
| 10660 | COX7A2   | 6.675506802 | Tumor_G2 |
| 10661 | COX7B    | 5.953258989 | Tumor_G2 |
| 10662 | COX8A    | 9.441827468 | Tumor_G2 |
| 10663 | SCO1     | 3.105791576 | Tumor_G2 |
| 10664 | SURF1    | 7.134001611 | Tumor_G2 |
| 10665 | ATP6V1E1 | 6.540440854 | Tumor_G2 |
| 10666 | DLAT     | 4.487136798 | Tumor_G2 |
| 10667 | PDC      | 0.203613303 | Tumor_G2 |
| 10668 | SUCLG2   | 6.263334813 | Tumor_G2 |
| 10669 | SLC25A5  | 7.532598876 | Tumor_G2 |
| 10670 | UCP2     | 7.004427453 | Tumor_G2 |
| 10671 | SOD2     | 4.893138777 | Tumor_G2 |
| 10672 | NOX4     | 0.778910824 | Tumor_G2 |
| 10673 | DUOX1    | 7.332143921 | Tumor_G2 |
| 10674 | DUOXA1   | 6.912838838 | Tumor_G2 |
| 10675 | DUOX2    | 7.172740379 | Tumor_G2 |
| 10676 | DUOXA2   | 5.775073613 | Tumor_G2 |
| 10677 | NDUFA1   | 8.300596821 | Tumor_G2 |
| 10678 | NDUFA2   | 7.11882831  | Tumor_G2 |

|       |          |             |          |
|-------|----------|-------------|----------|
| 10679 | NDUFA8   | 7.275469751 | Tumor_G2 |
| 10680 | NDUFB1   | 5.890643404 | Tumor_G2 |
| 10681 | NDUFB10  | 7.927379204 | Tumor_G2 |
| 10682 | NDUFB2   | 6.868312842 | Tumor_G2 |
| 10683 | NDUFB3   | 5.329389903 | Tumor_G2 |
| 10684 | NDUFB7   | 8.627342232 | Tumor_G2 |
| 10685 | CYC1     | 7.949856175 | Tumor_G2 |
| 10686 | ETFB     | 4.966738715 | Tumor_G2 |
| 10687 | UQCR10   | 7.529387435 | Tumor_G2 |
| 10688 | UQCRQ    | 7.495768598 | Tumor_G2 |
| 10689 | UQCC3    | 4.268536514 | Tumor_G2 |
| 10690 | COX15    | 4.72166578  | Tumor_G2 |
| 10691 | COX5A    | 7.446242184 | Tumor_G2 |
| 10692 | COX6B1   | 8.649258197 | Tumor_G2 |
| 10693 | COX6C    | 7.1600758   | Tumor_G2 |
| 10694 | COX7A2   | 6.974526204 | Tumor_G2 |
| 10695 | COX7B    | 6.779642051 | Tumor_G2 |
| 10696 | COX8A    | 9.752552646 | Tumor_G2 |
| 10697 | SCO1     | 3.365479563 | Tumor_G2 |
| 10698 | SURF1    | 6.205091114 | Tumor_G2 |
| 10699 | ATP6V1E1 | 6.665157137 | Tumor_G2 |
| 10700 | DLAT     | 5.077397346 | Tumor_G2 |
| 10701 | PDC      | 0           | Tumor_G2 |
| 10702 | SUCLG2   | 5.920748009 | Tumor_G2 |
| 10703 | SLC25A5  | 8.782952987 | Tumor_G2 |
| 10704 | UCP2     | 4.777769331 | Tumor_G2 |
| 10705 | SOD2     | 4.018352583 | Tumor_G2 |
| 10706 | NOX4     | 0.197939568 | Tumor_G2 |
| 10707 | DUOX1    | 4.785326986 | Tumor_G2 |
| 10708 | DUOXA1   | 4.768231072 | Tumor_G2 |
| 10709 | DUOX2    | 5.970081237 | Tumor_G2 |
| 10710 | DUOXA2   | 4.730056174 | Tumor_G2 |
| 10711 | NDUFA1   | 8.346371852 | Tumor_G2 |
| 10712 | NDUFA2   | 6.585829796 | Tumor_G2 |
| 10713 | NDUFA8   | 7.387401881 | Tumor_G2 |
| 10714 | NDUFB1   | 5.62309086  | Tumor_G2 |
| 10715 | NDUFB10  | 7.522111333 | Tumor_G2 |
| 10716 | NDUFB2   | 7.101325897 | Tumor_G2 |
| 10717 | NDUFB3   | 6.701075976 | Tumor_G2 |
| 10718 | NDUFB7   | 8.694912238 | Tumor_G2 |

|       |          |             |          |
|-------|----------|-------------|----------|
| 10719 | CYC1     | 7.476309057 | Tumor_G2 |
| 10720 | ETFB     | 4.684303764 | Tumor_G2 |
| 10721 | UQCR10   | 7.841892918 | Tumor_G2 |
| 10722 | UQCRQ    | 7.153223691 | Tumor_G2 |
| 10723 | UQCC3    | 4.18893463  | Tumor_G2 |
| 10724 | COX15    | 5.314739396 | Tumor_G2 |
| 10725 | COX5A    | 7.58705176  | Tumor_G2 |
| 10726 | COX6B1   | 8.685094368 | Tumor_G2 |
| 10727 | COX6C    | 6.841209512 | Tumor_G2 |
| 10728 | COX7A2   | 7.128640925 | Tumor_G2 |
| 10729 | COX7B    | 6.479551373 | Tumor_G2 |
| 10730 | COX8A    | 9.948244741 | Tumor_G2 |
| 10731 | SCO1     | 3.959749281 | Tumor_G2 |
| 10732 | SURF1    | 6.097928966 | Tumor_G2 |
| 10733 | ATP6V1E1 | 7.119503634 | Tumor_G2 |
| 10734 | DLAT     | 5.689561097 | Tumor_G2 |
| 10735 | PDC      | 0.131566441 | Tumor_G2 |
| 10736 | SUCLG2   | 6.697348003 | Tumor_G2 |
| 10737 | SLC25A5  | 9.085420924 | Tumor_G2 |
| 10738 | UCP2     | 6.738216668 | Tumor_G2 |
| 10739 | SOD2     | 5.21441174  | Tumor_G2 |
| 10740 | NOX4     | 1.291092618 | Tumor_G2 |
| 10741 | DUOX1    | 6.288106062 | Tumor_G2 |
| 10742 | DUOXA1   | 6.197386898 | Tumor_G2 |
| 10743 | DUOX2    | 8.189672916 | Tumor_G2 |
| 10744 | DUOXA2   | 5.288912701 | Tumor_G2 |
| 10745 | NDUFA1   | 7.881192686 | Tumor_G2 |
| 10746 | NDUFA2   | 6.352376484 | Tumor_G2 |
| 10747 | NDUFA8   | 7.084963009 | Tumor_G2 |
| 10748 | NDUFB1   | 5.613913581 | Tumor_G2 |
| 10749 | NDUFB10  | 7.427249934 | Tumor_G2 |
| 10750 | NDUFB2   | 6.622832924 | Tumor_G2 |
| 10751 | NDUFB3   | 6.185168068 | Tumor_G2 |
| 10752 | NDUFB7   | 8.518042084 | Tumor_G2 |
| 10753 | CYC1     | 6.939048434 | Tumor_G2 |
| 10754 | ETFB     | 5.722345955 | Tumor_G2 |
| 10755 | UQCR10   | 7.494903641 | Tumor_G2 |
| 10756 | UQCRQ    | 7.013894369 | Tumor_G2 |
| 10757 | UQCC3    | 4.576197814 | Tumor_G2 |
| 10758 | COX15    | 5.206464812 | Tumor_G2 |

|       |          |             |          |
|-------|----------|-------------|----------|
| 10759 | COX5A    | 6.922222621 | Tumor_G2 |
| 10760 | COX6B1   | 8.503249239 | Tumor_G2 |
| 10761 | COX6C    | 6.32266797  | Tumor_G2 |
| 10762 | COX7A2   | 6.924124767 | Tumor_G2 |
| 10763 | COX7B    | 5.919049731 | Tumor_G2 |
| 10764 | COX8A    | 9.337149475 | Tumor_G2 |
| 10765 | SCO1     | 3.656099293 | Tumor_G2 |
| 10766 | SURF1    | 6.540786828 | Tumor_G2 |
| 10767 | ATP6V1E1 | 6.876782126 | Tumor_G2 |
| 10768 | DLAT     | 5.154639613 | Tumor_G2 |
| 10769 | PDC      | 0.298896517 | Tumor_G2 |
| 10770 | SUCLG2   | 6.131138555 | Tumor_G2 |
| 10771 | SLC25A5  | 7.933998872 | Tumor_G2 |
| 10772 | UCP2     | 9.150292364 | Tumor_G2 |
| 10773 | SOD2     | 4.774386031 | Tumor_G2 |
| 10774 | NOX4     | 2.48056371  | Tumor_G2 |
| 10775 | DUOX1    | 7.734998606 | Tumor_G2 |
| 10776 | DUOXA1   | 7.834318882 | Tumor_G2 |
| 10777 | DUOX2    | 8.610334333 | Tumor_G2 |
| 10778 | DUOXA2   | 5.910205963 | Tumor_G2 |
| 10779 | NDUFA1   | 7.981379527 | Tumor_G2 |
| 10780 | NDUFA2   | 7.212150157 | Tumor_G2 |
| 10781 | NDUFA8   | 7.515856609 | Tumor_G2 |
| 10782 | NDUFB1   | 5.90084782  | Tumor_G2 |
| 10783 | NDUFB10  | 7.996161197 | Tumor_G2 |
| 10784 | NDUFB2   | 6.982812138 | Tumor_G2 |
| 10785 | NDUFB3   | 6.334281199 | Tumor_G2 |
| 10786 | NDUFB7   | 9.221963    | Tumor_G2 |
| 10787 | CYC1     | 7.07605949  | Tumor_G2 |
| 10788 | ETFB     | 5.590225117 | Tumor_G2 |
| 10789 | UQCR10   | 7.940483497 | Tumor_G2 |
| 10790 | UQCRQ    | 7.566846367 | Tumor_G2 |
| 10791 | UQCC3    | 4.859566888 | Tumor_G2 |
| 10792 | COX15    | 4.702225167 | Tumor_G2 |
| 10793 | COX5A    | 6.873314371 | Tumor_G2 |
| 10794 | COX6B1   | 8.983535095 | Tumor_G2 |
| 10795 | COX6C    | 6.661712714 | Tumor_G2 |
| 10796 | COX7A2   | 6.889714512 | Tumor_G2 |
| 10797 | COX7B    | 6.185317059 | Tumor_G2 |
| 10798 | COX8A    | 9.935767304 | Tumor_G2 |

|       |          |             |          |
|-------|----------|-------------|----------|
| 10799 | SCO1     | 3.342695222 | Tumor_G2 |
| 10800 | SURF1    | 6.85376288  | Tumor_G2 |
| 10801 | ATP6V1E1 | 6.696747274 | Tumor_G2 |
| 10802 | DLAT     | 4.582129125 | Tumor_G2 |
| 10803 | PDC      | 0.054376327 | Tumor_G2 |
| 10804 | SUCLG2   | 6.142415069 | Tumor_G2 |
| 10805 | SLC25A5  | 7.997073491 | Tumor_G2 |
| 10806 | UCP2     | 8.208534008 | Tumor_G2 |
| 10807 | SOD2     | 4.609490584 | Tumor_G2 |
| 10808 | NOX4     | 1.366080885 | Tumor_G2 |
| 10809 | DUOX1    | 7.576925197 | Tumor_G2 |
| 10810 | DUOXA1   | 7.241257426 | Tumor_G2 |
| 10811 | DUOX2    | 8.718984049 | Tumor_G2 |
| 10812 | DUOXA2   | 6.649306123 | Tumor_G2 |
| 10813 | NDUFA1   | 8.744470885 | Tumor_G2 |
| 10814 | NDUFA2   | 6.733138328 | Tumor_G2 |
| 10815 | NDUFA8   | 7.79639754  | Tumor_G2 |
| 10816 | NDUFB1   | 6.00318386  | Tumor_G2 |
| 10817 | NDUFB10  | 7.525863134 | Tumor_G2 |
| 10818 | NDUFB2   | 7.257686164 | Tumor_G2 |
| 10819 | NDUFB3   | 7.017726834 | Tumor_G2 |
| 10820 | NDUFB7   | 8.794095221 | Tumor_G2 |
| 10821 | CYC1     | 7.455859737 | Tumor_G2 |
| 10822 | ETFB     | 4.651004139 | Tumor_G2 |
| 10823 | UQCR10   | 8.349266855 | Tumor_G2 |
| 10824 | UQCRQ    | 7.613345031 | Tumor_G2 |
| 10825 | UQCC3    | 3.594192663 | Tumor_G2 |
| 10826 | COX15    | 5.150021256 | Tumor_G2 |
| 10827 | COX5A    | 7.973940079 | Tumor_G2 |
| 10828 | COX6B1   | 8.831659309 | Tumor_G2 |
| 10829 | COX6C    | 6.97187977  | Tumor_G2 |
| 10830 | COX7A2   | 7.573796851 | Tumor_G2 |
| 10831 | COX7B    | 7.412295745 | Tumor_G2 |
| 10832 | COX8A    | 9.863717037 | Tumor_G2 |
| 10833 | SCO1     | 3.783607417 | Tumor_G2 |
| 10834 | SURF1    | 5.516427694 | Tumor_G2 |
| 10835 | ATP6V1E1 | 6.642351601 | Tumor_G2 |
| 10836 | DLAT     | 5.833851922 | Tumor_G2 |
| 10837 | PDC      | 0.038945123 | Tumor_G2 |
| 10838 | SUCLG2   | 6.662300904 | Tumor_G2 |

|       |          |             |          |
|-------|----------|-------------|----------|
| 10839 | SLC25A5  | 9.164469642 | Tumor_G2 |
| 10840 | UCP2     | 6.828357075 | Tumor_G2 |
| 10841 | SOD2     | 5.552926218 | Tumor_G2 |
| 10842 | NOX4     | 0.798469486 | Tumor_G2 |
| 10843 | DUOX1    | 5.337899925 | Tumor_G2 |
| 10844 | DUOXA1   | 5.195106377 | Tumor_G2 |
| 10845 | DUOX2    | 6.042964571 | Tumor_G2 |
| 10846 | DUOXA2   | 4.384239853 | Tumor_G2 |
| 10847 | NDUFA1   | 8.694671215 | Tumor_G2 |
| 10848 | NDUFA2   | 6.865563856 | Tumor_G2 |
| 10849 | NDUFA8   | 7.511399713 | Tumor_G2 |
| 10850 | NDUFB1   | 6.35111803  | Tumor_G2 |
| 10851 | NDUFB10  | 7.194580407 | Tumor_G2 |
| 10852 | NDUFB2   | 7.809126025 | Tumor_G2 |
| 10853 | NDUFB3   | 7.034081052 | Tumor_G2 |
| 10854 | NDUFB7   | 8.841067381 | Tumor_G2 |
| 10855 | CYC1     | 7.73169605  | Tumor_G2 |
| 10856 | ETFB     | 4.586005123 | Tumor_G2 |
| 10857 | UQCR10   | 8.22468496  | Tumor_G2 |
| 10858 | UQCRQ    | 7.65177454  | Tumor_G2 |
| 10859 | UQCC3    | 3.974088815 | Tumor_G2 |
| 10860 | COX15    | 5.059410213 | Tumor_G2 |
| 10861 | COX5A    | 7.776350369 | Tumor_G2 |
| 10862 | COX6B1   | 8.942892644 | Tumor_G2 |
| 10863 | COX6C    | 7.170700992 | Tumor_G2 |
| 10864 | COX7A2   | 7.592785395 | Tumor_G2 |
| 10865 | COX7B    | 7.104927069 | Tumor_G2 |
| 10866 | COX8A    | 10.36261045 | Tumor_G2 |
| 10867 | SCO1     | 3.41788842  | Tumor_G2 |
| 10868 | SURF1    | 6.118470308 | Tumor_G2 |
| 10869 | ATP6V1E1 | 7.165346775 | Tumor_G2 |
| 10870 | DLAT     | 5.505692194 | Tumor_G2 |
| 10871 | PDC      | 0           | Tumor_G2 |
| 10872 | SUCLG2   | 6.756892386 | Tumor_G2 |
| 10873 | SLC25A5  | 9.076137981 | Tumor_G2 |
| 10874 | UCP2     | 6.895063575 | Tumor_G2 |
| 10875 | SOD2     | 5.05612552  | Tumor_G2 |
| 10876 | NOX4     | 1.529035039 | Tumor_G2 |
| 10877 | DUOX1    | 5.708652793 | Tumor_G2 |
| 10878 | DUOXA1   | 4.928523202 | Tumor_G2 |



|       |          |             |          |
|-------|----------|-------------|----------|
| 10879 | DUOX2    | 6.615001834 | Tumor_G2 |
| 10880 | DUOXA2   | 4.296191031 | Tumor_G2 |
| 10881 | NDUFA1   | 8.259103978 | Tumor_G2 |
| 10882 | NDUFA2   | 6.999729903 | Tumor_G2 |
| 10883 | NDUFA8   | 7.213273975 | Tumor_G2 |
| 10884 | NDUFB1   | 5.831688871 | Tumor_G2 |
| 10885 | NDUFB10  | 7.744837031 | Tumor_G2 |
| 10886 | NDUFB2   | 7.183129106 | Tumor_G2 |
| 10887 | NDUFB3   | 6.355538019 | Tumor_G2 |
| 10888 | NDUFB7   | 9.211375764 | Tumor_G2 |
| 10889 | CYC1     | 7.02958763  | Tumor_G2 |
| 10890 | ETFB     | 6.146787262 | Tumor_G2 |
| 10891 | UQCR10   | 7.324089518 | Tumor_G2 |
| 10892 | UQCRQ    | 7.716429255 | Tumor_G2 |
| 10893 | UQCC3    | 4.817109652 | Tumor_G2 |
| 10894 | COX15    | 4.675250928 | Tumor_G2 |
| 10895 | COX5A    | 7.03191359  | Tumor_G2 |
| 10896 | COX6B1   | 8.960139134 | Tumor_G2 |
| 10897 | COX6C    | 6.669427469 | Tumor_G2 |
| 10898 | COX7A2   | 7.180262773 | Tumor_G2 |
| 10899 | COX7B    | 6.130352668 | Tumor_G2 |
| 10900 | COX8A    | 9.546408007 | Tumor_G2 |
| 10901 | SCO1     | 3.320638339 | Tumor_G2 |
| 10902 | SURF1    | 6.923831555 | Tumor_G2 |
| 10903 | ATP6V1E1 | 6.932193801 | Tumor_G2 |
| 10904 | DLAT     | 4.783097742 | Tumor_G2 |
| 10905 | PDC      | 0.237994964 | Tumor_G2 |
| 10906 | SUCLG2   | 6.147888826 | Tumor_G2 |
| 10907 | SLC25A5  | 7.584974961 | Tumor_G2 |
| 10908 | UCP2     | 8.746274423 | Tumor_G2 |
| 10909 | SOD2     | 4.55791646  | Tumor_G2 |
| 10910 | NOX4     | 2.077432815 | Tumor_G2 |
| 10911 | DUOX1    | 6.834820838 | Tumor_G2 |
| 10912 | DUOXA1   | 7.101613701 | Tumor_G2 |
| 10913 | DUOX2    | 7.490706971 | Tumor_G2 |
| 10914 | DUOXA2   | 5.321043849 | Tumor_G2 |
| 10915 | NDUFA1   | 8.886160469 | Tumor_G2 |
| 10916 | NDUFA2   | 7.202658572 | Tumor_G2 |
| 10917 | NDUFA8   | 6.74770217  | Tumor_G2 |
| 10918 | NDUFB1   | 6.0557054   | Tumor_G2 |

|       |          |             |          |
|-------|----------|-------------|----------|
| 10919 | NDUFB10  | 7.464888142 | Tumor_G2 |
| 10920 | NDUFB2   | 7.328972568 | Tumor_G2 |
| 10921 | NDUFB3   | 5.624429275 | Tumor_G2 |
| 10922 | NDUFB7   | 9.083543508 | Tumor_G2 |
| 10923 | CYC1     | 7.604933096 | Tumor_G2 |
| 10924 | ETFB     | 5.087246886 | Tumor_G2 |
| 10925 | UQCR10   | 7.003045602 | Tumor_G2 |
| 10926 | UQCRQ    | 7.74965076  | Tumor_G2 |
| 10927 | UQCC3    | 4.393764131 | Tumor_G2 |
| 10928 | COX15    | 4.873239845 | Tumor_G2 |
| 10929 | COX5A    | 7.14043616  | Tumor_G2 |
| 10930 | COX6B1   | 8.854600781 | Tumor_G2 |
| 10931 | COX6C    | 7.252958967 | Tumor_G2 |
| 10932 | COX7A2   | 7.092657784 | Tumor_G2 |
| 10933 | COX7B    | 6.915348712 | Tumor_G2 |
| 10934 | COX8A    | 10.07039723 | Tumor_G2 |
| 10935 | SCO1     | 3.480878306 | Tumor_G2 |
| 10936 | SURF1    | 5.604948906 | Tumor_G2 |
| 10937 | ATP6V1E1 | 5.949039072 | Tumor_G2 |
| 10938 | DLAT     | 5.277651018 | Tumor_G2 |
| 10939 | PDC      | 0           | Tumor_G2 |
| 10940 | SUCLG2   | 6.103533541 | Tumor_G2 |
| 10941 | SLC25A5  | 9.271205586 | Tumor_G2 |
| 10942 | UCP2     | 3.578067992 | Tumor_G2 |
| 10943 | SOD2     | 4.700031274 | Tumor_G2 |
| 10944 | NOX4     | 0.823044966 | Tumor_G2 |
| 10945 | DUOX1    | 4.278566286 | Tumor_G2 |
| 10946 | DUOXA1   | 3.848312943 | Tumor_G2 |
| 10947 | DUOX2    | 4.345248203 | Tumor_G2 |
| 10948 | DUOXA2   | 3.754735944 | Tumor_G2 |
| 10949 | NDUFA1   | 8.332183216 | Tumor_G2 |
| 10950 | NDUFA2   | 6.84829248  | Tumor_G2 |
| 10951 | NDUFA8   | 7.257118575 | Tumor_G2 |
| 10952 | NDUFB1   | 6.075557056 | Tumor_G2 |
| 10953 | NDUFB10  | 7.796914436 | Tumor_G2 |
| 10954 | NDUFB2   | 7.16051987  | Tumor_G2 |
| 10955 | NDUFB3   | 6.634280209 | Tumor_G2 |
| 10956 | NDUFB7   | 8.722358861 | Tumor_G2 |
| 10957 | CYC1     | 7.540179222 | Tumor_G2 |
| 10958 | ETFB     | 5.050755825 | Tumor_G2 |

|       |          |             |          |
|-------|----------|-------------|----------|
| 10959 | UQCR10   | 7.93503336  | Tumor_G2 |
| 10960 | UQCRQ    | 7.564400102 | Tumor_G2 |
| 10961 | UQCC3    | 4.532650931 | Tumor_G2 |
| 10962 | COX15    | 5.265809498 | Tumor_G2 |
| 10963 | COX5A    | 7.820795141 | Tumor_G2 |
| 10964 | COX6B1   | 8.736936615 | Tumor_G2 |
| 10965 | COX6C    | 6.904933712 | Tumor_G2 |
| 10966 | COX7A2   | 7.266346541 | Tumor_G2 |
| 10967 | COX7B    | 6.468522291 | Tumor_G2 |
| 10968 | COX8A    | 9.696768421 | Tumor_G2 |
| 10969 | SCO1     | 3.824100302 | Tumor_G2 |
| 10970 | SURF1    | 6.840365891 | Tumor_G2 |
| 10971 | ATP6V1E1 | 7.457016819 | Tumor_G2 |
| 10972 | DLAT     | 5.621274496 | Tumor_G2 |
| 10973 | PDC      | 0.039991309 | Tumor_G2 |
| 10974 | SUCLG2   | 6.926505307 | Tumor_G2 |
| 10975 | SLC25A5  | 9.058668318 | Tumor_G2 |
| 10976 | UCP2     | 8.678531016 | Tumor_G2 |
| 10977 | SOD2     | 5.150067019 | Tumor_G2 |
| 10978 | NOX4     | 1.140066197 | Tumor_G2 |
| 10979 | DUOX1    | 6.243246411 | Tumor_G2 |
| 10980 | DUOXA1   | 6.410095635 | Tumor_G2 |
| 10981 | DUOX2    | 6.596722404 | Tumor_G2 |
| 10982 | DUOXA2   | 4.175082143 | Tumor_G2 |
| 10983 | NDUFA1   | 8.160954446 | Tumor_G2 |
| 10984 | NDUFA2   | 6.600533108 | Tumor_G2 |
| 10985 | NDUFA8   | 7.108376868 | Tumor_G2 |
| 10986 | NDUFB1   | 5.799462495 | Tumor_G2 |
| 10987 | NDUFB10  | 7.170115152 | Tumor_G2 |
| 10988 | NDUFB2   | 6.595525275 | Tumor_G2 |
| 10989 | NDUFB3   | 6.569494848 | Tumor_G2 |
| 10990 | NDUFB7   | 8.507502918 | Tumor_G2 |
| 10991 | CYC1     | 6.738434748 | Tumor_G2 |
| 10992 | ETFB     | 5.046944071 | Tumor_G2 |
| 10993 | UQCR10   | 7.747001468 | Tumor_G2 |
| 10994 | UQCRQ    | 7.249937655 | Tumor_G2 |
| 10995 | UQCC3    | 4.174740218 | Tumor_G2 |
| 10996 | COX15    | 5.164289901 | Tumor_G2 |
| 10997 | COX5A    | 7.057805184 | Tumor_G2 |
| 10998 | COX6B1   | 8.544321738 | Tumor_G2 |

|       |          |             |          |
|-------|----------|-------------|----------|
| 10999 | COX6C    | 6.493479065 | Tumor_G2 |
| 11000 | COX7A2   | 6.927457476 | Tumor_G2 |
| 11001 | COX7B    | 6.162376345 | Tumor_G2 |
| 11002 | COX8A    | 8.938372733 | Tumor_G2 |
| 11003 | SCO1     | 3.629195391 | Tumor_G2 |
| 11004 | SURF1    | 6.221676351 | Tumor_G2 |
| 11005 | ATP6V1E1 | 7.026491489 | Tumor_G2 |
| 11006 | DLAT     | 5.329321497 | Tumor_G2 |
| 11007 | PDC      | 0.297522583 | Tumor_G2 |
| 11008 | SUCLG2   | 6.511210885 | Tumor_G2 |
| 11009 | SLC25A5  | 8.01187271  | Tumor_G2 |
| 11010 | UCP2     | 8.838511601 | Tumor_G2 |
| 11011 | SOD2     | 5.358776167 | Tumor_G2 |
| 11012 | NOX4     | 1.776026955 | Tumor_G2 |
| 11013 | DUOX1    | 7.091908591 | Tumor_G2 |
| 11014 | DUOXA1   | 7.064541643 | Tumor_G2 |
| 11015 | DUOX2    | 8.038772458 | Tumor_G2 |
| 11016 | DUOXA2   | 5.326276429 | Tumor_G2 |
| 11017 | NDUFA1   | 8.200044914 | Tumor_G2 |
| 11018 | NDUFA2   | 6.894737439 | Tumor_G2 |
| 11019 | NDUFA8   | 7.59902654  | Tumor_G2 |
| 11020 | NDUFB1   | 6.326358061 | Tumor_G2 |
| 11021 | NDUFB10  | 7.832501442 | Tumor_G2 |
| 11022 | NDUFB2   | 7.10145299  | Tumor_G2 |
| 11023 | NDUFB3   | 6.711357059 | Tumor_G2 |
| 11024 | NDUFB7   | 8.854827587 | Tumor_G2 |
| 11025 | CYC1     | 5.943325992 | Tumor_G2 |
| 11026 | ETFB     | 5.515196274 | Tumor_G2 |
| 11027 | UQCR10   | 8.008009478 | Tumor_G2 |
| 11028 | UQCRQ    | 7.706467286 | Tumor_G2 |
| 11029 | UQCC3    | 4.504278683 | Tumor_G2 |
| 11030 | COX15    | 4.633330185 | Tumor_G2 |
| 11031 | COX5A    | 7.391154826 | Tumor_G2 |
| 11032 | COX6B1   | 9.01819938  | Tumor_G2 |
| 11033 | COX6C    | 6.834596667 | Tumor_G2 |
| 11034 | COX7A2   | 7.291234556 | Tumor_G2 |
| 11035 | COX7B    | 6.57230441  | Tumor_G2 |
| 11036 | COX8A    | 9.746609558 | Tumor_G2 |
| 11037 | SCO1     | 3.291699918 | Tumor_G2 |
| 11038 | SURF1    | 6.518975368 | Tumor_G2 |

|       |          |             |          |
|-------|----------|-------------|----------|
| 11039 | ATP6V1E1 | 6.633392899 | Tumor_G2 |
| 11040 | DLAT     | 4.832428803 | Tumor_G2 |
| 11041 | PDC      | 0.097873024 | Tumor_G2 |
| 11042 | SUCLG2   | 5.567803821 | Tumor_G2 |
| 11043 | SLC25A5  | 7.748722132 | Tumor_G2 |
| 11044 | UCP2     | 8.118369955 | Tumor_G2 |
| 11045 | SOD2     | 4.44859252  | Tumor_G2 |
| 11046 | NOX4     | 1.479505822 | Tumor_G2 |
| 11047 | DUOX1    | 7.339376667 | Tumor_G2 |
| 11048 | DUOXA1   | 6.775146138 | Tumor_G2 |
| 11049 | DUOX2    | 9.493024879 | Tumor_G2 |
| 11050 | DUOXA2   | 8.391772629 | Tumor_G2 |
| 11051 | NDUFA1   | 8.300259746 | Tumor_G2 |
| 11052 | NDUFA2   | 6.785756407 | Tumor_G2 |
| 11053 | NDUFA8   | 7.253320521 | Tumor_G2 |
| 11054 | NDUFB1   | 5.848780579 | Tumor_G2 |
| 11055 | NDUFB10  | 7.60717827  | Tumor_G2 |
| 11056 | NDUFB2   | 6.569657798 | Tumor_G2 |
| 11057 | NDUFB3   | 6.500841313 | Tumor_G2 |
| 11058 | NDUFB7   | 8.727980335 | Tumor_G2 |
| 11059 | CYC1     | 6.763927224 | Tumor_G2 |
| 11060 | ETFB     | 4.943778877 | Tumor_G2 |
| 11061 | UQCR10   | 7.795807466 | Tumor_G2 |
| 11062 | UQCRQ    | 7.353440022 | Tumor_G2 |
| 11063 | UQCC3    | 4.656983684 | Tumor_G2 |
| 11064 | COX15    | 4.984302633 | Tumor_G2 |
| 11065 | COX5A    | 7.071733487 | Tumor_G2 |
| 11066 | COX6B1   | 8.768609758 | Tumor_G2 |
| 11067 | COX6C    | 6.577756224 | Tumor_G2 |
| 11068 | COX7A2   | 6.964342835 | Tumor_G2 |
| 11069 | COX7B    | 6.060035624 | Tumor_G2 |
| 11070 | COX8A    | 9.395453486 | Tumor_G2 |
| 11071 | SCO1     | 3.388107558 | Tumor_G2 |
| 11072 | SURF1    | 6.742331867 | Tumor_G2 |
| 11073 | ATP6V1E1 | 7.07033877  | Tumor_G2 |
| 11074 | DLAT     | 5.095755943 | Tumor_G2 |
| 11075 | PDC      | 0.061219381 | Tumor_G2 |
| 11076 | SUCLG2   | 6.063795831 | Tumor_G2 |
| 11077 | SLC25A5  | 7.789784969 | Tumor_G2 |
| 11078 | UCP2     | 8.218761127 | Tumor_G2 |

|       |          |             |          |
|-------|----------|-------------|----------|
| 11079 | SOD2     | 5.229192443 | Tumor_G2 |
| 11080 | NOX4     | 3.456588075 | Tumor_G2 |
| 11081 | DUOX1    | 6.145078235 | Tumor_G2 |
| 11082 | DUOXA1   | 6.320634794 | Tumor_G2 |
| 11083 | DUOX2    | 6.32618939  | Tumor_G2 |
| 11084 | DUOXA2   | 5.027318958 | Tumor_G2 |
| 11085 | NDUFA1   | 7.809444203 | Tumor_G2 |
| 11086 | NDUFA2   | 6.552465921 | Tumor_G2 |
| 11087 | NDUFA8   | 6.964747001 | Tumor_G2 |
| 11088 | NDUFB1   | 5.577000962 | Tumor_G2 |
| 11089 | NDUFB10  | 7.404759633 | Tumor_G2 |
| 11090 | NDUFB2   | 6.787317784 | Tumor_G2 |
| 11091 | NDUFB3   | 6.336255915 | Tumor_G2 |
| 11092 | NDUFB7   | 8.70452035  | Tumor_G2 |
| 11093 | CYC1     | 7.099523652 | Tumor_G2 |
| 11094 | ETFB     | 5.313161516 | Tumor_G2 |
| 11095 | UQCR10   | 7.580825475 | Tumor_G2 |
| 11096 | UQCRQ    | 7.171783755 | Tumor_G2 |
| 11097 | UQCC3    | 4.58078026  | Tumor_G2 |
| 11098 | COX15    | 4.92701858  | Tumor_G2 |
| 11099 | COX5A    | 7.012491229 | Tumor_G2 |
| 11100 | COX6B1   | 8.511793566 | Tumor_G2 |
| 11101 | COX6C    | 6.42697923  | Tumor_G2 |
| 11102 | COX7A2   | 6.673397318 | Tumor_G2 |
| 11103 | COX7B    | 5.883253824 | Tumor_G2 |
| 11104 | COX8A    | 9.620871721 | Tumor_G2 |
| 11105 | SCO1     | 3.317494333 | Tumor_G2 |
| 11106 | SURF1    | 6.472767815 | Tumor_G2 |
| 11107 | ATP6V1E1 | 6.921467413 | Tumor_G2 |
| 11108 | DLAT     | 5.069922789 | Tumor_G2 |
| 11109 | PDC      | 0.098529543 | Tumor_G2 |
| 11110 | SUCLG2   | 6.385263577 | Tumor_G2 |
| 11111 | SLC25A5  | 8.115106174 | Tumor_G2 |
| 11112 | UCP2     | 8.696025798 | Tumor_G2 |
| 11113 | SOD2     | 4.805142294 | Tumor_G2 |
| 11114 | NOX4     | 1.947355391 | Tumor_G2 |
| 11115 | DUOX1    | 7.406070871 | Tumor_G2 |
| 11116 | DUOXA1   | 7.124303615 | Tumor_G2 |
| 11117 | DUOX2    | 8.075175536 | Tumor_G2 |
| 11118 | DUOXA2   | 6.052817202 | Tumor_G2 |

|       |          |             |          |
|-------|----------|-------------|----------|
| 11119 | NDUFA1   | 8.407947634 | Tumor_G2 |
| 11120 | NDUFA2   | 7.130407835 | Tumor_G2 |
| 11121 | NDUFA8   | 7.513347201 | Tumor_G2 |
| 11122 | NDUFB1   | 6.280410424 | Tumor_G2 |
| 11123 | NDUFB10  | 7.912234116 | Tumor_G2 |
| 11124 | NDUFB2   | 6.964825788 | Tumor_G2 |
| 11125 | NDUFB3   | 6.693758194 | Tumor_G2 |
| 11126 | NDUFB7   | 9.091336313 | Tumor_G2 |
| 11127 | CYC1     | 7.003927503 | Tumor_G2 |
| 11128 | ETFB     | 5.450866765 | Tumor_G2 |
| 11129 | UQCR10   | 8.142970043 | Tumor_G2 |
| 11130 | UQCRQ    | 7.849861321 | Tumor_G2 |
| 11131 | UQCC3    | 4.813838795 | Tumor_G2 |
| 11132 | COX15    | 5.116000814 | Tumor_G2 |
| 11133 | COX5A    | 7.231960304 | Tumor_G2 |
| 11134 | COX6B1   | 8.963911344 | Tumor_G2 |
| 11135 | COX6C    | 6.975893167 | Tumor_G2 |
| 11136 | COX7A2   | 7.094401266 | Tumor_G2 |
| 11137 | COX7B    | 6.513814978 | Tumor_G2 |
| 11138 | COX8A    | 9.341101932 | Tumor_G2 |
| 11139 | SCO1     | 3.394248248 | Tumor_G2 |
| 11140 | SURF1    | 7.077316804 | Tumor_G2 |
| 11141 | ATP6V1E1 | 7.140336445 | Tumor_G2 |
| 11142 | DLAT     | 5.251102169 | Tumor_G2 |
| 11143 | PDC      | 0           | Tumor_G2 |
| 11144 | SUCLG2   | 6.438293493 | Tumor_G2 |
| 11145 | SLC25A5  | 7.742947745 | Tumor_G2 |
| 11146 | UCP2     | 7.796196121 | Tumor_G2 |
| 11147 | SOD2     | 4.837840055 | Tumor_G2 |
| 11148 | NOX4     | 2.685116279 | Tumor_G2 |
| 11149 | DUOX1    | 7.343670688 | Tumor_G2 |
| 11150 | DUOXA1   | 7.376852899 | Tumor_G2 |
| 11151 | DUOX2    | 8.110848807 | Tumor_G2 |
| 11152 | DUOXA2   | 5.73227994  | Tumor_G2 |
| 11153 | NDUFA1   | 8.369904989 | Tumor_G2 |
| 11154 | NDUFA2   | 6.369632417 | Tumor_G2 |
| 11155 | NDUFA8   | 7.161543021 | Tumor_G2 |
| 11156 | NDUFB1   | 6.402119444 | Tumor_G2 |
| 11157 | NDUFB10  | 7.527897206 | Tumor_G2 |
| 11158 | NDUFB2   | 5.857166588 | Tumor_G2 |

|       |          |             |          |
|-------|----------|-------------|----------|
| 11159 | NDUFB3   | 6.045730303 | Tumor_G2 |
| 11160 | NDUFB7   | 8.834708536 | Tumor_G2 |
| 11161 | CYC1     | 6.178146156 | Tumor_G2 |
| 11162 | ETFB     | 4.801730273 | Tumor_G2 |
| 11163 | UQCR10   | 7.848918718 | Tumor_G2 |
| 11164 | UQCRQ    | 7.072006958 | Tumor_G2 |
| 11165 | UQCC3    | 3.457873408 | Tumor_G2 |
| 11166 | COX15    | 4.032179619 | Tumor_G2 |
| 11167 | COX5A    | 6.533432401 | Tumor_G2 |
| 11168 | COX6B1   | 9.231501542 | Tumor_G2 |
| 11169 | COX6C    | 6.362375551 | Tumor_G2 |
| 11170 | COX7A2   | 6.777800507 | Tumor_G2 |
| 11171 | COX7B    | 6.703348812 | Tumor_G2 |
| 11172 | COX8A    | 8.377645072 | Tumor_G2 |
| 11173 | SCO1     | 2.706878851 | Tumor_G2 |
| 11174 | SURF1    | 6.367270548 | Tumor_G2 |
| 11175 | ATP6V1E1 | 6.165283653 | Tumor_G2 |
| 11176 | DLAT     | 3.704030544 | Tumor_G2 |
| 11177 | PDC      | 0           | Tumor_G2 |
| 11178 | SUCLG2   | 4.740299543 | Tumor_G2 |
| 11179 | SLC25A5  | 7.049380556 | Tumor_G2 |
| 11180 | UCP2     | 8.206836465 | Tumor_G2 |
| 11181 | SOD2     | 3.910517302 | Tumor_G2 |
| 11182 | NOX4     | 1.582436297 | Tumor_G2 |
| 11183 | DUOX1    | 7.187529828 | Tumor_G2 |
| 11184 | DUOXA1   | 7.006726719 | Tumor_G2 |
| 11185 | DUOX2    | 7.758488051 | Tumor_G2 |
| 11186 | DUOXA2   | 5.069904234 | Tumor_G2 |
| 11187 | NDUFA1   | 8.290898329 | Tumor_G2 |
| 11188 | NDUFA2   | 6.895876708 | Tumor_G2 |
| 11189 | NDUFA8   | 6.967324061 | Tumor_G2 |
| 11190 | NDUFB1   | 6.005064064 | Tumor_G2 |
| 11191 | NDUFB10  | 7.28626355  | Tumor_G2 |
| 11192 | NDUFB2   | 6.799590427 | Tumor_G2 |
| 11193 | NDUFB3   | 6.733257822 | Tumor_G2 |
| 11194 | NDUFB7   | 8.552595526 | Tumor_G2 |
| 11195 | CYC1     | 6.882458824 | Tumor_G2 |
| 11196 | ETFB     | 5.119327636 | Tumor_G2 |
| 11197 | UQCR10   | 7.029560864 | Tumor_G2 |
| 11198 | UQCRQ    | 7.155242854 | Tumor_G2 |



|       |          |             |          |
|-------|----------|-------------|----------|
| 11199 | UQCC3    | 4.131417007 | Tumor_G2 |
| 11200 | COX15    | 5.310209353 | Tumor_G2 |
| 11201 | COX5A    | 7.123118069 | Tumor_G2 |
| 11202 | COX6B1   | 8.533288697 | Tumor_G2 |
| 11203 | COX6C    | 6.682634526 | Tumor_G2 |
| 11204 | COX7A2   | 7.066369211 | Tumor_G2 |
| 11205 | COX7B    | 6.186018978 | Tumor_G2 |
| 11206 | COX8A    | 10.04355926 | Tumor_G2 |
| 11207 | SCO1     | 4.21638457  | Tumor_G2 |
| 11208 | SURF1    | 6.494908584 | Tumor_G2 |
| 11209 | ATP6V1E1 | 6.705024941 | Tumor_G2 |
| 11210 | DLAT     | 5.300214194 | Tumor_G2 |
| 11211 | PDC      | 0.259529277 | Tumor_G2 |
| 11212 | SUCLG2   | 6.929273724 | Tumor_G2 |
| 11213 | SLC25A5  | 8.564691382 | Tumor_G2 |
| 11214 | UCP2     | 7.661433912 | Tumor_G2 |
| 11215 | SOD2     | 4.054203642 | Tumor_G2 |
| 11216 | NOX4     | 2.148740838 | Tumor_G2 |
| 11217 | DUOX1    | 8.397226162 | Tumor_G2 |
| 11218 | DUOXA1   | 7.346509559 | Tumor_G2 |
| 11219 | DUOX2    | 10.87726088 | Tumor_G2 |
| 11220 | DUOXA2   | 8.654387262 | Tumor_G2 |
| 11221 | NDUFA1   | 8.469552272 | Tumor_G2 |
| 11222 | NDUFA2   | 7.006181694 | Tumor_G2 |
| 11223 | NDUFA8   | 7.334878545 | Tumor_G2 |
| 11224 | NDUFB1   | 6.072217828 | Tumor_G2 |
| 11225 | NDUFB10  | 7.53588796  | Tumor_G2 |
| 11226 | NDUFB2   | 6.688341638 | Tumor_G2 |
| 11227 | NDUFB3   | 6.701418295 | Tumor_G2 |
| 11228 | NDUFB7   | 8.922146583 | Tumor_G2 |
| 11229 | CYC1     | 7.009590356 | Tumor_G2 |
| 11230 | ETFB     | 5.064799348 | Tumor_G2 |
| 11231 | UQCR10   | 8.015081368 | Tumor_G2 |
| 11232 | UQCRQ    | 7.264840675 | Tumor_G2 |
| 11233 | UQCC3    | 4.472641668 | Tumor_G2 |
| 11234 | COX15    | 5.412173483 | Tumor_G2 |
| 11235 | COX5A    | 7.15338765  | Tumor_G2 |
| 11236 | COX6B1   | 8.731196497 | Tumor_G2 |
| 11237 | COX6C    | 6.874400403 | Tumor_G2 |
| 11238 | COX7A2   | 7.006012652 | Tumor_G2 |

|       |          |             |          |
|-------|----------|-------------|----------|
| 11239 | COX7B    | 6.131586837 | Tumor_G2 |
| 11240 | COX8A    | 9.314762379 | Tumor_G2 |
| 11241 | SCO1     | 3.876528089 | Tumor_G2 |
| 11242 | SURF1    | 6.651955138 | Tumor_G2 |
| 11243 | ATP6V1E1 | 7.022507787 | Tumor_G2 |
| 11244 | DLAT     | 5.459418803 | Tumor_G2 |
| 11245 | PDC      | 0.066494358 | Tumor_G2 |
| 11246 | SUCLG2   | 6.43053462  | Tumor_G2 |
| 11247 | SLC25A5  | 8.066745557 | Tumor_G2 |
| 11248 | UCP2     | 7.51758452  | Tumor_G2 |
| 11249 | SOD2     | 5.197705086 | Tumor_G2 |
| 11250 | NOX4     | 2.235470193 | Tumor_G2 |
| 11251 | DUOX1    | 6.515988971 | Tumor_G2 |
| 11252 | DUOXA1   | 6.423776737 | Tumor_G2 |
| 11253 | DUOX2    | 7.042013654 | Tumor_G2 |
| 11254 | DUOXA2   | 6.009137722 | Tumor_G2 |
| 11255 | NDUFA1   | 8.718731236 | Tumor_G2 |
| 11256 | NDUFA2   | 7.141471613 | Tumor_G2 |
| 11257 | NDUFA8   | 7.294114262 | Tumor_G2 |
| 11258 | NDUFB1   | 6.33126693  | Tumor_G2 |
| 11259 | NDUFB10  | 7.814239334 | Tumor_G2 |
| 11260 | NDUFB2   | 6.81849751  | Tumor_G2 |
| 11261 | NDUFB3   | 6.69415428  | Tumor_G2 |
| 11262 | NDUFB7   | 9.158007329 | Tumor_G2 |
| 11263 | CYC1     | 6.959298291 | Tumor_G2 |
| 11264 | ETFB     | 5.444476385 | Tumor_G2 |
| 11265 | UQCR10   | 8.164591757 | Tumor_G2 |
| 11266 | UQCRQ    | 7.76584529  | Tumor_G2 |
| 11267 | UQCC3    | 4.874098304 | Tumor_G2 |
| 11268 | COX15    | 4.74831982  | Tumor_G2 |
| 11269 | COX5A    | 7.388926233 | Tumor_G2 |
| 11270 | COX6B1   | 9.249071155 | Tumor_G2 |
| 11271 | COX6C    | 7.086580173 | Tumor_G2 |
| 11272 | COX7A2   | 7.17941393  | Tumor_G2 |
| 11273 | COX7B    | 6.371405184 | Tumor_G2 |
| 11274 | COX8A    | 9.590162163 | Tumor_G2 |
| 11275 | SCO1     | 3.116742867 | Tumor_G2 |
| 11276 | SURF1    | 7.017935441 | Tumor_G2 |
| 11277 | ATP6V1E1 | 7.030832434 | Tumor_G2 |
| 11278 | DLAT     | 4.956819386 | Tumor_G2 |

|       |          |             |          |
|-------|----------|-------------|----------|
| 11279 | PDC      | 0           | Tumor_G2 |
| 11280 | SUCLG2   | 6.091474047 | Tumor_G2 |
| 11281 | SLC25A5  | 7.336801063 | Tumor_G2 |
| 11282 | UCP2     | 8.940627478 | Tumor_G2 |
| 11283 | SOD2     | 4.890776414 | Tumor_G2 |
| 11284 | NOX4     | 2.913060611 | Tumor_G2 |
| 11285 | DUOX1    | 6.375458729 | Tumor_G2 |
| 11286 | DUOXA1   | 6.937090104 | Tumor_G2 |
| 11287 | DUOX2    | 7.264854813 | Tumor_G2 |
| 11288 | DUOXA2   | 5.287003967 | Tumor_G2 |
| 11289 | NDUFA1   | 8.571141568 | Tumor_G2 |
| 11290 | NDUFA2   | 7.148395837 | Tumor_G2 |
| 11291 | NDUFA8   | 7.247871914 | Tumor_G2 |
| 11292 | NDUFB1   | 6.471234158 | Tumor_G2 |
| 11293 | NDUFB10  | 7.858064412 | Tumor_G2 |
| 11294 | NDUFB2   | 6.422145911 | Tumor_G2 |
| 11295 | NDUFB3   | 6.131428094 | Tumor_G2 |
| 11296 | NDUFB7   | 8.89974018  | Tumor_G2 |
| 11297 | CYC1     | 6.419418204 | Tumor_G2 |
| 11298 | ETFB     | 4.600307553 | Tumor_G2 |
| 11299 | UQCR10   | 7.548938326 | Tumor_G2 |
| 11300 | UQCRQ    | 7.759111428 | Tumor_G2 |
| 11301 | UQCC3    | 4.527766004 | Tumor_G2 |
| 11302 | COX15    | 4.437508279 | Tumor_G2 |
| 11303 | COX5A    | 7.525659801 | Tumor_G2 |
| 11304 | COX6B1   | 9.324072036 | Tumor_G2 |
| 11305 | COX6C    | 7.090820044 | Tumor_G2 |
| 11306 | COX7A2   | 7.213017777 | Tumor_G2 |
| 11307 | COX7B    | 6.379014317 | Tumor_G2 |
| 11308 | COX8A    | 9.188746384 | Tumor_G2 |
| 11309 | SCO1     | 2.698644941 | Tumor_G2 |
| 11310 | SURF1    | 6.510543203 | Tumor_G2 |
| 11311 | ATP6V1E1 | 6.344915471 | Tumor_G2 |
| 11312 | DLAT     | 4.943372838 | Tumor_G2 |
| 11313 | PDC      | 0.093307007 | Tumor_G2 |
| 11314 | SUCLG2   | 5.767131503 | Tumor_G2 |
| 11315 | SLC25A5  | 7.347551691 | Tumor_G2 |
| 11316 | UCP2     | 7.789485043 | Tumor_G2 |
| 11317 | SOD2     | 4.398376078 | Tumor_G2 |
| 11318 | NOX4     | 2.95570382  | Tumor_G2 |

|       |          |             |          |
|-------|----------|-------------|----------|
| 11319 | DUOX1    | 5.5911418   | Tumor_G2 |
| 11320 | DUOXA1   | 6.099538657 | Tumor_G2 |
| 11321 | DUOX2    | 7.058300152 | Tumor_G2 |
| 11322 | DUOXA2   | 4.488954577 | Tumor_G2 |
| 11323 | NDUFA1   | 8.421266457 | Tumor_G2 |
| 11324 | NDUFA2   | 7.08316925  | Tumor_G2 |
| 11325 | NDUFA8   | 7.278413291 | Tumor_G2 |
| 11326 | NDUFB1   | 6.197785633 | Tumor_G2 |
| 11327 | NDUFB10  | 7.574123255 | Tumor_G2 |
| 11328 | NDUFB2   | 6.363981278 | Tumor_G2 |
| 11329 | NDUFB3   | 6.569512596 | Tumor_G2 |
| 11330 | NDUFB7   | 8.75375753  | Tumor_G2 |
| 11331 | CYC1     | 6.753843501 | Tumor_G2 |
| 11332 | ETFB     | 5.128436917 | Tumor_G2 |
| 11333 | UQCR10   | 8.05824547  | Tumor_G2 |
| 11334 | UQCRQ    | 7.811984593 | Tumor_G2 |
| 11335 | UQCC3    | 4.373881581 | Tumor_G2 |
| 11336 | COX15    | 4.657767417 | Tumor_G2 |
| 11337 | COX5A    | 7.439290402 | Tumor_G2 |
| 11338 | COX6B1   | 9.111275003 | Tumor_G2 |
| 11339 | COX6C    | 6.747844718 | Tumor_G2 |
| 11340 | COX7A2   | 7.175667639 | Tumor_G2 |
| 11341 | COX7B    | 6.409646258 | Tumor_G2 |
| 11342 | COX8A    | 9.339550559 | Tumor_G2 |
| 11343 | SCO1     | 3.333155754 | Tumor_G2 |
| 11344 | SURF1    | 6.727111197 | Tumor_G2 |
| 11345 | ATP6V1E1 | 6.794078667 | Tumor_G2 |
| 11346 | DLAT     | 5.121368641 | Tumor_G2 |
| 11347 | PDC      | 0           | Tumor_G2 |
| 11348 | SUCLG2   | 6.048089489 | Tumor_G2 |
| 11349 | SLC25A5  | 8.37307918  | Tumor_G2 |
| 11350 | UCP2     | 8.162302406 | Tumor_G2 |
| 11351 | SOD2     | 5.624064172 | Tumor_G2 |
| 11352 | NOX4     | 2.964410817 | Tumor_G2 |
| 11353 | DUOX1    | 6.227599179 | Tumor_G2 |
| 11354 | DUOXA1   | 6.112276986 | Tumor_G2 |
| 11355 | DUOX2    | 6.132978461 | Tumor_G2 |
| 11356 | DUOXA2   | 4.352325006 | Tumor_G2 |
| 11357 | NDUFA1   | 8.589501704 | Tumor_G2 |
| 11358 | NDUFA2   | 7.563046313 | Tumor_G2 |

|       |          |             |          |
|-------|----------|-------------|----------|
| 11359 | NDUFA8   | 7.384426386 | Tumor_G2 |
| 11360 | NDUFB1   | 6.064567841 | Tumor_G2 |
| 11361 | NDUFB10  | 7.966493145 | Tumor_G2 |
| 11362 | NDUFB2   | 7.667895706 | Tumor_G2 |
| 11363 | NDUFB3   | 6.770593414 | Tumor_G2 |
| 11364 | NDUFB7   | 9.176619051 | Tumor_G2 |
| 11365 | CYC1     | 7.372997242 | Tumor_G2 |
| 11366 | ETFB     | 5.40584689  | Tumor_G2 |
| 11367 | UQCR10   | 8.025057166 | Tumor_G2 |
| 11368 | UQCRQ    | 7.689161032 | Tumor_G2 |
| 11369 | UQCC3    | 5.427848884 | Tumor_G2 |
| 11370 | COX15    | 5.20738891  | Tumor_G2 |
| 11371 | COX5A    | 7.314083217 | Tumor_G2 |
| 11372 | COX6B1   | 9.071626205 | Tumor_G2 |
| 11373 | COX6C    | 6.696763086 | Tumor_G2 |
| 11374 | COX7A2   | 7.09410647  | Tumor_G2 |
| 11375 | COX7B    | 6.278018761 | Tumor_G2 |
| 11376 | COX8A    | 10.07658805 | Tumor_G2 |
| 11377 | SCO1     | 3.598229914 | Tumor_G2 |
| 11378 | SURF1    | 7.059619846 | Tumor_G2 |
| 11379 | ATP6V1E1 | 7.148768795 | Tumor_G2 |
| 11380 | DLAT     | 5.360490112 | Tumor_G2 |
| 11381 | PDC      | 0           | Tumor_G2 |
| 11382 | SUCLG2   | 6.674137603 | Tumor_G2 |
| 11383 | SLC25A5  | 8.516654492 | Tumor_G2 |
| 11384 | UCP2     | 8.419433288 | Tumor_G2 |
| 11385 | SOD2     | 4.873106339 | Tumor_G2 |
| 11386 | NOX4     | 1.278038233 | Tumor_G2 |
| 11387 | DUOX1    | 7.005024854 | Tumor_G2 |
| 11388 | DUOXA1   | 6.528393494 | Tumor_G2 |
| 11389 | DUOX2    | 7.935835597 | Tumor_G2 |
| 11390 | DUOXA2   | 6.987527663 | Tumor_G2 |
| 11391 | NDUFA1   | 8.565882691 | Tumor_G2 |
| 11392 | NDUFA2   | 7.081529102 | Tumor_G2 |
| 11393 | NDUFA8   | 7.31180507  | Tumor_G2 |
| 11394 | NDUFB1   | 6.094463294 | Tumor_G2 |
| 11395 | NDUFB10  | 7.774359763 | Tumor_G2 |
| 11396 | NDUFB2   | 7.083848302 | Tumor_G2 |
| 11397 | NDUFB3   | 6.733301122 | Tumor_G2 |
| 11398 | NDUFB7   | 9.20612164  | Tumor_G2 |

|       |          |             |          |
|-------|----------|-------------|----------|
| 11399 | CYC1     | 7.155580274 | Tumor_G2 |
| 11400 | ETFB     | 5.679680457 | Tumor_G2 |
| 11401 | UQCR10   | 8.075521271 | Tumor_G2 |
| 11402 | UQCRQ    | 7.501694081 | Tumor_G2 |
| 11403 | UQCC3    | 5.016333374 | Tumor_G2 |
| 11404 | COX15    | 5.038870899 | Tumor_G2 |
| 11405 | COX5A    | 7.10418968  | Tumor_G2 |
| 11406 | COX6B1   | 9.007363164 | Tumor_G2 |
| 11407 | COX6C    | 6.712507132 | Tumor_G2 |
| 11408 | COX7A2   | 6.969987388 | Tumor_G2 |
| 11409 | COX7B    | 6.254254821 | Tumor_G2 |
| 11410 | COX8A    | 9.908166751 | Tumor_G2 |
| 11411 | SCO1     | 3.637164111 | Tumor_G2 |
| 11412 | SURF1    | 6.665811305 | Tumor_G2 |
| 11413 | ATP6V1E1 | 7.134579942 | Tumor_G2 |
| 11414 | DLAT     | 4.977699302 | Tumor_G2 |
| 11415 | PDC      | 0.377658655 | Tumor_G2 |
| 11416 | SUCLG2   | 5.989094396 | Tumor_G2 |
| 11417 | SLC25A5  | 7.405558424 | Tumor_G2 |
| 11418 | UCP2     | 8.787111506 | Tumor_G2 |
| 11419 | SOD2     | 4.579758443 | Tumor_G2 |
| 11420 | NOX4     | 1.786878261 | Tumor_G2 |
| 11421 | DUOX1    | 6.925954669 | Tumor_G2 |
| 11422 | DUOXA1   | 7.3220197   | Tumor_G2 |
| 11423 | DUOX2    | 8.425099686 | Tumor_G2 |
| 11424 | DUOXA2   | 6.928075069 | Tumor_G2 |
| 11425 | NDUFA1   | 8.427590989 | Tumor_G2 |
| 11426 | NDUFA2   | 7.393635924 | Tumor_G2 |
| 11427 | NDUFA8   | 7.514585068 | Tumor_G2 |
| 11428 | NDUFB1   | 6.262567953 | Tumor_G2 |
| 11429 | NDUFB10  | 7.707203285 | Tumor_G2 |
| 11430 | NDUFB2   | 7.361775154 | Tumor_G2 |
| 11431 | NDUFB3   | 6.907446265 | Tumor_G2 |
| 11432 | NDUFB7   | 9.183881706 | Tumor_G2 |
| 11433 | CYC1     | 7.273348187 | Tumor_G2 |
| 11434 | ETFB     | 5.442107635 | Tumor_G2 |
| 11435 | UQCR10   | 8.410973536 | Tumor_G2 |
| 11436 | UQCRQ    | 7.891501166 | Tumor_G2 |
| 11437 | UQCC3    | 4.965189448 | Tumor_G2 |
| 11438 | COX15    | 5.252771174 | Tumor_G2 |

|       |          |             |          |
|-------|----------|-------------|----------|
| 11439 | COX5A    | 7.451075734 | Tumor_G2 |
| 11440 | COX6B1   | 8.958484073 | Tumor_G2 |
| 11441 | COX6C    | 6.915306482 | Tumor_G2 |
| 11442 | COX7A2   | 7.316852194 | Tumor_G2 |
| 11443 | COX7B    | 6.660898532 | Tumor_G2 |
| 11444 | COX8A    | 10.10919769 | Tumor_G2 |
| 11445 | SCO1     | 3.658164948 | Tumor_G2 |
| 11446 | SURF1    | 6.845568717 | Tumor_G2 |
| 11447 | ATP6V1E1 | 7.05820217  | Tumor_G2 |
| 11448 | DLAT     | 5.404619581 | Tumor_G2 |
| 11449 | PDC      | 0.267940673 | Tumor_G2 |
| 11450 | SUCLG2   | 6.653908267 | Tumor_G2 |
| 11451 | SLC25A5  | 8.351472584 | Tumor_G2 |
| 11452 | UCP2     | 7.216768888 | Tumor_G2 |
| 11453 | SOD2     | 4.429462168 | Tumor_G2 |
| 11454 | NOX4     | 1.335805687 | Tumor_G2 |
| 11455 | DUOX1    | 8.699314088 | Tumor_G2 |
| 11456 | DUOXA1   | 7.997716812 | Tumor_G2 |
| 11457 | DUOX2    | 9.512765054 | Tumor_G2 |
| 11458 | DUOXA2   | 7.043046438 | Tumor_G2 |
| 11459 | NDUFA1   | 8.033043006 | Tumor_G2 |
| 11460 | NDUFA2   | 6.924442242 | Tumor_G2 |
| 11461 | NDUFA8   | 7.345071207 | Tumor_G2 |
| 11462 | NDUFB1   | 5.7092051   | Tumor_G2 |
| 11463 | NDUFB10  | 7.379684934 | Tumor_G2 |
| 11464 | NDUFB2   | 6.669328941 | Tumor_G2 |
| 11465 | NDUFB3   | 6.362588466 | Tumor_G2 |
| 11466 | NDUFB7   | 8.828445832 | Tumor_G2 |
| 11467 | CYC1     | 7.209756106 | Tumor_G2 |
| 11468 | ETFB     | 5.216045429 | Tumor_G2 |
| 11469 | UQCR10   | 7.045690985 | Tumor_G2 |
| 11470 | UQCRQ    | 7.258414192 | Tumor_G2 |
| 11471 | UQCC3    | 4.859432012 | Tumor_G2 |
| 11472 | COX15    | 4.971416778 | Tumor_G2 |
| 11473 | COX5A    | 6.893873544 | Tumor_G2 |
| 11474 | COX6B1   | 8.658333481 | Tumor_G2 |
| 11475 | COX6C    | 6.22657693  | Tumor_G2 |
| 11476 | COX7A2   | 7.09212974  | Tumor_G2 |
| 11477 | COX7B    | 6.052010291 | Tumor_G2 |
| 11478 | COX8A    | 9.538187297 | Tumor_G2 |

|       |          |             |          |
|-------|----------|-------------|----------|
| 11479 | SCO1     | 3.558213033 | Tumor_G2 |
| 11480 | SURF1    | 6.561946368 | Tumor_G2 |
| 11481 | ATP6V1E1 | 6.51901551  | Tumor_G2 |
| 11482 | DLAT     | 5.097178143 | Tumor_G2 |
| 11483 | PDC      | 0.064263365 | Tumor_G2 |
| 11484 | SUCLG2   | 6.357689368 | Tumor_G2 |
| 11485 | SLC25A5  | 7.808857107 | Tumor_G2 |
| 11486 | UCP2     | 8.242840573 | Tumor_G2 |
| 11487 | SOD2     | 4.103387871 | Tumor_G2 |
| 11488 | NOX4     | 1.705408704 | Tumor_G2 |
| 11489 | DUOX1    | 7.185530406 | Tumor_G2 |
| 11490 | DUOXA1   | 7.542543506 | Tumor_G2 |
| 11491 | DUOX2    | 8.528943174 | Tumor_G2 |
| 11492 | DUOXA2   | 6.323204847 | Tumor_G2 |
| 11493 | NDUFA1   | 9.01074633  | Tumor_G2 |
| 11494 | NDUFA2   | 7.619894098 | Tumor_G2 |
| 11495 | NDUFA8   | 7.604472642 | Tumor_G2 |
| 11496 | NDUFB1   | 5.579386181 | Tumor_G2 |
| 11497 | NDUFB10  | 8.246979609 | Tumor_G2 |
| 11498 | NDUFB2   | 7.147005411 | Tumor_G2 |
| 11499 | NDUFB3   | 6.676006957 | Tumor_G2 |
| 11500 | NDUFB7   | 9.484470865 | Tumor_G2 |
| 11501 | CYC1     | 7.816277388 | Tumor_G2 |
| 11502 | ETFB     | 4.816130924 | Tumor_G2 |
| 11503 | UQCR10   | 8.284180924 | Tumor_G2 |
| 11504 | UQCRQ    | 8.507737062 | Tumor_G2 |
| 11505 | UQCC3    | 4.734252629 | Tumor_G2 |
| 11506 | COX15    | 4.915404538 | Tumor_G2 |
| 11507 | COX5A    | 8.560840369 | Tumor_G2 |
| 11508 | COX6B1   | 9.541774804 | Tumor_G2 |
| 11509 | COX6C    | 6.92282268  | Tumor_G2 |
| 11510 | COX7A2   | 7.78823861  | Tumor_G2 |
| 11511 | COX7B    | 8.136747427 | Tumor_G2 |
| 11512 | COX8A    | 10.73232606 | Tumor_G2 |
| 11513 | SCO1     | 3.858967989 | Tumor_G2 |
| 11514 | SURF1    | 6.061202198 | Tumor_G2 |
| 11515 | ATP6V1E1 | 6.924039776 | Tumor_G2 |
| 11516 | DLAT     | 6.181457355 | Tumor_G2 |
| 11517 | PDC      | 0.064680771 | Tumor_G2 |
| 11518 | SUCLG2   | 6.753016692 | Tumor_G2 |



|       |          |             |          |
|-------|----------|-------------|----------|
| 11519 | SLC25A5  | 10.30099179 | Tumor_G2 |
| 11520 | UCP2     | 3.49088526  | Tumor_G2 |
| 11521 | SOD2     | 5.623470104 | Tumor_G2 |
| 11522 | NOX4     | 0.306481374 | Tumor_G2 |
| 11523 | DUOX1    | 3.964910127 | Tumor_G2 |
| 11524 | DUOXA1   | 3.738823766 | Tumor_G2 |
| 11525 | DUOX2    | 3.70802588  | Tumor_G2 |
| 11526 | DUOXA2   | 1.926244257 | Tumor_G2 |
| 11527 | NDUFA1   | 8.209692477 | Tumor_G2 |
| 11528 | NDUFA2   | 7.048215278 | Tumor_G2 |
| 11529 | NDUFA8   | 7.231035738 | Tumor_G2 |
| 11530 | NDUFB1   | 6.061907052 | Tumor_G2 |
| 11531 | NDUFB10  | 7.846605794 | Tumor_G2 |
| 11532 | NDUFB2   | 6.587030339 | Tumor_G2 |
| 11533 | NDUFB3   | 5.927288675 | Tumor_G2 |
| 11534 | NDUFB7   | 8.909369246 | Tumor_G2 |
| 11535 | CYC1     | 6.758467338 | Tumor_G2 |
| 11536 | ETFB     | 5.098827445 | Tumor_G2 |
| 11537 | UQCR10   | 7.814934643 | Tumor_G2 |
| 11538 | UQCRQ    | 7.659694718 | Tumor_G2 |
| 11539 | UQCC3    | 4.416823347 | Tumor_G2 |
| 11540 | COX15    | 3.935518021 | Tumor_G2 |
| 11541 | COX5A    | 7.253896253 | Tumor_G2 |
| 11542 | COX6B1   | 9.166101238 | Tumor_G2 |
| 11543 | COX6C    | 6.839748721 | Tumor_G2 |
| 11544 | COX7A2   | 6.870185351 | Tumor_G2 |
| 11545 | COX7B    | 6.105079803 | Tumor_G2 |
| 11546 | COX8A    | 9.509542128 | Tumor_G2 |
| 11547 | SCO1     | 2.223779494 | Tumor_G2 |
| 11548 | SURF1    | 6.481902735 | Tumor_G2 |
| 11549 | ATP6V1E1 | 6.868095208 | Tumor_G2 |
| 11550 | DLAT     | 4.045003568 | Tumor_G2 |
| 11551 | PDC      | 0.122436574 | Tumor_G2 |
| 11552 | SUCLG2   | 5.658543949 | Tumor_G2 |
| 11553 | SLC25A5  | 7.015125189 | Tumor_G2 |
| 11554 | UCP2     | 8.582263614 | Tumor_G2 |
| 11555 | SOD2     | 4.23804823  | Tumor_G2 |
| 11556 | NOX4     | 1.784438784 | Tumor_G2 |
| 11557 | DUOX1    | 5.364051428 | Tumor_G2 |
| 11558 | DUOXA1   | 5.645350285 | Tumor_G2 |

|       |          |             |          |
|-------|----------|-------------|----------|
| 11559 | DUOX2    | 5.428044565 | Tumor_G2 |
| 11560 | DUOXA2   | 4.612687418 | Tumor_G2 |
| 11561 | NDUFA1   | 8.069725618 | Tumor_G2 |
| 11562 | NDUFA2   | 6.691594118 | Tumor_G2 |
| 11563 | NDUFA8   | 7.187461688 | Tumor_G2 |
| 11564 | NDUFB1   | 5.720915836 | Tumor_G2 |
| 11565 | NDUFB10  | 7.621425663 | Tumor_G2 |
| 11566 | NDUFB2   | 6.434597766 | Tumor_G2 |
| 11567 | NDUFB3   | 6.110804754 | Tumor_G2 |
| 11568 | NDUFB7   | 8.746507548 | Tumor_G2 |
| 11569 | CYC1     | 6.94830821  | Tumor_G2 |
| 11570 | ETFB     | 4.831678434 | Tumor_G2 |
| 11571 | UQCR10   | 7.207164188 | Tumor_G2 |
| 11572 | UQCRQ    | 7.316174079 | Tumor_G2 |
| 11573 | UQCC3    | 4.385676509 | Tumor_G2 |
| 11574 | COX15    | 4.485376357 | Tumor_G2 |
| 11575 | COX5A    | 7.266178459 | Tumor_G2 |
| 11576 | COX6B1   | 8.6445443   | Tumor_G2 |
| 11577 | COX6C    | 6.514735114 | Tumor_G2 |
| 11578 | COX7A2   | 6.83496162  | Tumor_G2 |
| 11579 | COX7B    | 6.143202089 | Tumor_G2 |
| 11580 | COX8A    | 9.526025506 | Tumor_G2 |
| 11581 | SCO1     | 3.060659186 | Tumor_G2 |
| 11582 | SURF1    | 6.497552469 | Tumor_G2 |
| 11583 | ATP6V1E1 | 6.298562793 | Tumor_G2 |
| 11584 | DLAT     | 4.641483571 | Tumor_G2 |
| 11585 | PDC      | 0.093818989 | Tumor_G2 |
| 11586 | SUCLG2   | 6.157033764 | Tumor_G2 |
| 11587 | SLC25A5  | 8.065599263 | Tumor_G2 |
| 11588 | UCP2     | 8.343348927 | Tumor_G2 |
| 11589 | SOD2     | 4.835298928 | Tumor_G2 |
| 11590 | NOX4     | 1.74589142  | Tumor_G2 |
| 11591 | DUOX1    | 6.436907855 | Tumor_G2 |
| 11592 | DUOXA1   | 6.751050564 | Tumor_G2 |
| 11593 | DUOX2    | 7.729996751 | Tumor_G2 |
| 11594 | DUOXA2   | 5.817474694 | Tumor_G2 |
| 11595 | NDUFA1   | 8.489849512 | Tumor_G2 |
| 11596 | NDUFA2   | 7.460662892 | Tumor_G2 |
| 11597 | NDUFA8   | 7.457369836 | Tumor_G2 |
| 11598 | NDUFB1   | 6.740878218 | Tumor_G2 |

|       |          |             |          |
|-------|----------|-------------|----------|
| 11599 | NDUFB10  | 7.879423357 | Tumor_G2 |
| 11600 | NDUFB2   | 6.004532747 | Tumor_G2 |
| 11601 | NDUFB3   | 5.583911801 | Tumor_G2 |
| 11602 | NDUFB7   | 9.563621946 | Tumor_G2 |
| 11603 | CYC1     | 6.355035996 | Tumor_G2 |
| 11604 | ETFB     | 5.451450478 | Tumor_G2 |
| 11605 | UQCR10   | 7.150125842 | Tumor_G2 |
| 11606 | UQCRQ    | 8.009460063 | Tumor_G2 |
| 11607 | UQCC3    | 4.806217256 | Tumor_G2 |
| 11608 | COX15    | 3.80745743  | Tumor_G2 |
| 11609 | COX5A    | 6.612488561 | Tumor_G2 |
| 11610 | COX6B1   | 9.422936759 | Tumor_G2 |
| 11611 | COX6C    | 7.213339215 | Tumor_G2 |
| 11612 | COX7A2   | 6.744936383 | Tumor_G2 |
| 11613 | COX7B    | 6.28355002  | Tumor_G2 |
| 11614 | COX8A    | 9.375373012 | Tumor_G2 |
| 11615 | SCO1     | 1.917702179 | Tumor_G2 |
| 11616 | SURF1    | 6.288581408 | Tumor_G2 |
| 11617 | ATP6V1E1 | 5.166446285 | Tumor_G2 |
| 11618 | DLAT     | 3.53368724  | Tumor_G2 |
| 11619 | PDC      | 0.036473585 | Tumor_G2 |
| 11620 | SUCLG2   | 5.02673664  | Tumor_G2 |
| 11621 | SLC25A5  | 5.434968384 | Tumor_G2 |
| 11622 | UCP2     | 7.984717006 | Tumor_G2 |
| 11623 | SOD2     | 2.994339418 | Tumor_G2 |
| 11624 | NOX4     | 1.358090248 | Tumor_G2 |
| 11625 | DUOX1    | 7.456010053 | Tumor_G2 |
| 11626 | DUOXA1   | 7.792651179 | Tumor_G2 |
| 11627 | DUOX2    | 8.710453574 | Tumor_G2 |
| 11628 | DUOXA2   | 6.730636981 | Tumor_G2 |
| 11629 | NDUFA1   | 7.876242416 | Tumor_G2 |
| 11630 | NDUFA2   | 7.008759381 | Tumor_G2 |
| 11631 | NDUFA8   | 7.28414909  | Tumor_G2 |
| 11632 | NDUFB1   | 6.043900412 | Tumor_G2 |
| 11633 | NDUFB10  | 7.377012268 | Tumor_G2 |
| 11634 | NDUFB2   | 6.667493049 | Tumor_G2 |
| 11635 | NDUFB3   | 6.102355055 | Tumor_G2 |
| 11636 | NDUFB7   | 8.837322808 | Tumor_G2 |
| 11637 | CYC1     | 7.283864794 | Tumor_G2 |
| 11638 | ETFB     | 5.390736955 | Tumor_G2 |

|       |          |             |          |
|-------|----------|-------------|----------|
| 11639 | UQCR10   | 6.947570883 | Tumor_G2 |
| 11640 | UQCRQ    | 7.926253485 | Tumor_G2 |
| 11641 | UQCC3    | 4.357761186 | Tumor_G2 |
| 11642 | COX15    | 4.583262614 | Tumor_G2 |
| 11643 | COX5A    | 7.316229854 | Tumor_G2 |
| 11644 | COX6B1   | 8.808650595 | Tumor_G2 |
| 11645 | COX6C    | 6.911283199 | Tumor_G2 |
| 11646 | COX7A2   | 6.925821178 | Tumor_G2 |
| 11647 | COX7B    | 6.273520444 | Tumor_G2 |
| 11648 | COX8A    | 9.833582704 | Tumor_G2 |
| 11649 | SCO1     | 3.049061318 | Tumor_G2 |
| 11650 | SURF1    | 6.197436706 | Tumor_G2 |
| 11651 | ATP6V1E1 | 6.038418385 | Tumor_G2 |
| 11652 | DLAT     | 4.777606281 | Tumor_G2 |
| 11653 | PDC      | 0.139707419 | Tumor_G2 |
| 11654 | SUCLG2   | 6.450382452 | Tumor_G2 |
| 11655 | SLC25A5  | 7.938012606 | Tumor_G2 |
| 11656 | UCP2     | 7.437942638 | Tumor_G2 |
| 11657 | SOD2     | 3.904709379 | Tumor_G2 |
| 11658 | NOX4     | 1.422598515 | Tumor_G2 |
| 11659 | DUOX1    | 7.241705361 | Tumor_G2 |
| 11660 | DUOXA1   | 6.545337454 | Tumor_G2 |
| 11661 | DUOX2    | 9.289384    | Tumor_G2 |
| 11662 | DUOXA2   | 7.641378547 | Tumor_G2 |
| 11663 | NDUFA1   | 7.611468004 | Tumor_G2 |
| 11664 | NDUFA2   | 6.563575927 | Tumor_G2 |
| 11665 | NDUFA8   | 7.169175859 | Tumor_G2 |
| 11666 | NDUFB1   | 5.502126933 | Tumor_G2 |
| 11667 | NDUFB10  | 7.530096296 | Tumor_G2 |
| 11668 | NDUFB2   | 6.564902054 | Tumor_G2 |
| 11669 | NDUFB3   | 6.301902804 | Tumor_G2 |
| 11670 | NDUFB7   | 8.655310319 | Tumor_G2 |
| 11671 | CYC1     | 6.999973138 | Tumor_G2 |
| 11672 | ETFB     | 5.21715618  | Tumor_G2 |
| 11673 | UQCR10   | 7.534374622 | Tumor_G2 |
| 11674 | UQCRQ    | 7.046842893 | Tumor_G2 |
| 11675 | UQCC3    | 4.611970358 | Tumor_G2 |
| 11676 | COX15    | 5.127209461 | Tumor_G2 |
| 11677 | COX5A    | 6.864332257 | Tumor_G2 |
| 11678 | COX6B1   | 8.671580178 | Tumor_G2 |

|       |          |             |          |
|-------|----------|-------------|----------|
| 11679 | COX6C    | 6.294377892 | Tumor_G2 |
| 11680 | COX7A2   | 6.746317239 | Tumor_G2 |
| 11681 | COX7B    | 5.94478904  | Tumor_G2 |
| 11682 | COX8A    | 9.506514773 | Tumor_G2 |
| 11683 | SCO1     | 3.66300854  | Tumor_G2 |
| 11684 | SURF1    | 6.924440769 | Tumor_G2 |
| 11685 | ATP6V1E1 | 6.700856945 | Tumor_G2 |
| 11686 | DLAT     | 4.997169653 | Tumor_G2 |
| 11687 | PDC      | 0.145090634 | Tumor_G2 |
| 11688 | SUCLG2   | 6.262745583 | Tumor_G2 |
| 11689 | SLC25A5  | 8.305374688 | Tumor_G2 |
| 11690 | UCP2     | 8.512149805 | Tumor_G2 |
| 11691 | SOD2     | 5.077008645 | Tumor_G2 |
| 11692 | NOX4     | 2.161650791 | Tumor_G2 |
| 11693 | DUOX1    | 7.400629802 | Tumor_G2 |
| 11694 | DUOXA1   | 7.038206637 | Tumor_G2 |
| 11695 | DUOX2    | 8.335026657 | Tumor_G2 |
| 11696 | DUOXA2   | 7.41841089  | Tumor_G2 |
| 11697 | NDUFA1   | 8.422201859 | Tumor_G2 |
| 11698 | NDUFA2   | 7.131822757 | Tumor_G2 |
| 11699 | NDUFA8   | 6.962700011 | Tumor_G2 |
| 11700 | NDUFB1   | 6.03886392  | Tumor_G2 |
| 11701 | NDUFB10  | 7.578967994 | Tumor_G2 |
| 11702 | NDUFB2   | 6.716625983 | Tumor_G2 |
| 11703 | NDUFB3   | 6.465297603 | Tumor_G2 |
| 11704 | NDUFB7   | 8.740678552 | Tumor_G2 |
| 11705 | CYC1     | 7.385726076 | Tumor_G2 |
| 11706 | ETFB     | 4.846249363 | Tumor_G2 |
| 11707 | UQCR10   | 7.795049804 | Tumor_G2 |
| 11708 | UQCRQ    | 7.130796312 | Tumor_G2 |
| 11709 | UQCC3    | 4.524172802 | Tumor_G2 |
| 11710 | COX15    | 5.279324965 | Tumor_G2 |
| 11711 | COX5A    | 7.233584497 | Tumor_G2 |
| 11712 | COX6B1   | 8.790864691 | Tumor_G2 |
| 11713 | COX6C    | 6.539718041 | Tumor_G2 |
| 11714 | COX7A2   | 7.287711818 | Tumor_G2 |
| 11715 | COX7B    | 6.401515084 | Tumor_G2 |
| 11716 | COX8A    | 9.592423273 | Tumor_G2 |
| 11717 | SCO1     | 2.989308615 | Tumor_G2 |
| 11718 | SURF1    | 6.383648505 | Tumor_G2 |

|       |          |             |          |
|-------|----------|-------------|----------|
| 11719 | ATP6V1E1 | 7.210355451 | Tumor_G2 |
| 11720 | DLAT     | 5.015688057 | Tumor_G2 |
| 11721 | PDC      | 0.122576191 | Tumor_G2 |
| 11722 | SUCLG2   | 6.31298977  | Tumor_G2 |
| 11723 | SLC25A5  | 9.263508848 | Tumor_G2 |
| 11724 | UCP2     | 6.562548225 | Tumor_G2 |
| 11725 | SOD2     | 5.042904743 | Tumor_G2 |
| 11726 | NOX4     | 1.327431838 | Tumor_G2 |
| 11727 | DUOX1    | 5.77592866  | Tumor_G2 |
| 11728 | DUOXA1   | 5.842620143 | Tumor_G2 |
| 11729 | DUOX2    | 5.542588836 | Tumor_G2 |
| 11730 | DUOXA2   | 3.954687419 | Tumor_G2 |
| 11731 | NDUFA1   | 8.225384415 | Tumor_G2 |
| 11732 | NDUFA2   | 6.722150488 | Tumor_G2 |
| 11733 | NDUFA8   | 7.296009412 | Tumor_G2 |
| 11734 | NDUFB1   | 6.062210669 | Tumor_G2 |
| 11735 | NDUFB10  | 7.28534929  | Tumor_G2 |
| 11736 | NDUFB2   | 6.880038763 | Tumor_G2 |
| 11737 | NDUFB3   | 6.535304    | Tumor_G2 |
| 11738 | NDUFB7   | 8.616248775 | Tumor_G2 |
| 11739 | CYC1     | 7.173097908 | Tumor_G2 |
| 11740 | ETFB     | 5.08507478  | Tumor_G2 |
| 11741 | UQCR10   | 7.898324876 | Tumor_G2 |
| 11742 | UQCRQ    | 7.503085033 | Tumor_G2 |
| 11743 | UQCC3    | 4.057764984 | Tumor_G2 |
| 11744 | COX15    | 4.630604671 | Tumor_G2 |
| 11745 | COX5A    | 7.623502409 | Tumor_G2 |
| 11746 | COX6B1   | 8.845648437 | Tumor_G2 |
| 11747 | COX6C    | 6.891217286 | Tumor_G2 |
| 11748 | COX7A2   | 7.161875578 | Tumor_G2 |
| 11749 | COX7B    | 6.637444552 | Tumor_G2 |
| 11750 | COX8A    | 10.02180426 | Tumor_G2 |
| 11751 | SCO1     | 2.751702869 | Tumor_G2 |
| 11752 | SURF1    | 5.958839929 | Tumor_G2 |
| 11753 | ATP6V1E1 | 6.907076959 | Tumor_G2 |
| 11754 | DLAT     | 4.814445546 | Tumor_G2 |
| 11755 | PDC      | 0.070025057 | Tumor_G2 |
| 11756 | SUCLG2   | 6.027021002 | Tumor_G2 |
| 11757 | SLC25A5  | 8.349638775 | Tumor_G2 |
| 11758 | UCP2     | 6.621287204 | Tumor_G2 |

|       |          |             |          |
|-------|----------|-------------|----------|
| 11759 | SOD2     | 4.510642762 | Tumor_G2 |
| 11760 | NOX4     | 1.49606901  | Tumor_G2 |
| 11761 | DUOX1    | 6.625924022 | Tumor_G2 |
| 11762 | DUOXA1   | 5.766455459 | Tumor_G2 |
| 11763 | DUOX2    | 7.67314041  | Tumor_G2 |
| 11764 | DUOXA2   | 6.219431207 | Tumor_G2 |
| 11765 | NDUFA1   | 7.721545844 | Tumor_G2 |
| 11766 | NDUFA2   | 6.412187338 | Tumor_G2 |
| 11767 | NDUFA8   | 6.771327287 | Tumor_G2 |
| 11768 | NDUFB1   | 5.303300604 | Tumor_G2 |
| 11769 | NDUFB10  | 7.120287378 | Tumor_G2 |
| 11770 | NDUFB2   | 6.369333079 | Tumor_G2 |
| 11771 | NDUFB3   | 6.00139746  | Tumor_G2 |
| 11772 | NDUFB7   | 8.415277112 | Tumor_G2 |
| 11773 | CYC1     | 6.692423779 | Tumor_G2 |
| 11774 | ETFB     | 5.02609808  | Tumor_G2 |
| 11775 | UQCR10   | 7.289379668 | Tumor_G2 |
| 11776 | UQCRQ    | 6.976480043 | Tumor_G2 |
| 11777 | UQCC3    | 4.187390678 | Tumor_G2 |
| 11778 | COX15    | 4.619561005 | Tumor_G2 |
| 11779 | COX5A    | 6.637973471 | Tumor_G2 |
| 11780 | COX6B1   | 8.379379324 | Tumor_G2 |
| 11781 | COX6C    | 6.02373119  | Tumor_G2 |
| 11782 | COX7A2   | 6.478158732 | Tumor_G2 |
| 11783 | COX7B    | 5.798957761 | Tumor_G2 |
| 11784 | COX8A    | 9.34472892  | Tumor_G2 |
| 11785 | SCO1     | 3.174895821 | Tumor_G2 |
| 11786 | SURF1    | 6.148870997 | Tumor_G2 |
| 11787 | ATP6V1E1 | 6.897769344 | Tumor_G2 |
| 11788 | DLAT     | 4.919076962 | Tumor_G2 |
| 11789 | PDC      | 0.088932576 | Tumor_G2 |
| 11790 | SUCLG2   | 5.592538979 | Tumor_G2 |
| 11791 | SLC25A5  | 7.810300401 | Tumor_G2 |
| 11792 | UCP2     | 10.00984951 | Tumor_G2 |
| 11793 | SOD2     | 4.418015467 | Tumor_G2 |
| 11794 | NOX4     | 2.634446972 | Tumor_G2 |
| 11795 | DUOX1    | 7.054126525 | Tumor_G2 |
| 11796 | DUOXA1   | 7.135847389 | Tumor_G2 |
| 11797 | DUOX2    | 7.930264475 | Tumor_G2 |
| 11798 | DUOXA2   | 5.347027265 | Tumor_G2 |

|       |          |             |          |
|-------|----------|-------------|----------|
| 11799 | NDUFA1   | 7.814527057 | Tumor_G2 |
| 11800 | NDUFA2   | 6.468842265 | Tumor_G2 |
| 11801 | NDUFA8   | 6.890513407 | Tumor_G2 |
| 11802 | NDUFB1   | 5.355205091 | Tumor_G2 |
| 11803 | NDUFB10  | 7.595035739 | Tumor_G2 |
| 11804 | NDUFB2   | 6.474801603 | Tumor_G2 |
| 11805 | NDUFB3   | 5.98957772  | Tumor_G2 |
| 11806 | NDUFB7   | 8.576117368 | Tumor_G2 |
| 11807 | CYC1     | 6.790897888 | Tumor_G2 |
| 11808 | ETFB     | 4.923371516 | Tumor_G2 |
| 11809 | UQCR10   | 7.502139764 | Tumor_G2 |
| 11810 | UQCRQ    | 7.051339502 | Tumor_G2 |
| 11811 | UQCC3    | 4.262498617 | Tumor_G2 |
| 11812 | COX15    | 4.914712762 | Tumor_G2 |
| 11813 | COX5A    | 6.914803484 | Tumor_G2 |
| 11814 | COX6B1   | 8.590127235 | Tumor_G2 |
| 11815 | COX6C    | 6.233445844 | Tumor_G2 |
| 11816 | COX7A2   | 6.617732814 | Tumor_G2 |
| 11817 | COX7B    | 5.731537436 | Tumor_G2 |
| 11818 | COX8A    | 9.454093406 | Tumor_G2 |
| 11819 | SCO1     | 3.1592664   | Tumor_G2 |
| 11820 | SURF1    | 6.109512465 | Tumor_G2 |
| 11821 | ATP6V1E1 | 7.131992464 | Tumor_G2 |
| 11822 | DLAT     | 4.960737318 | Tumor_G2 |
| 11823 | PDC      | 0           | Tumor_G2 |
| 11824 | SUCLG2   | 6.2999383   | Tumor_G2 |
| 11825 | SLC25A5  | 8.23227581  | Tumor_G2 |
| 11826 | UCP2     | 8.569808652 | Tumor_G2 |
| 11827 | SOD2     | 4.809320258 | Tumor_G2 |
| 11828 | NOX4     | 2.436900758 | Tumor_G2 |
| 11829 | DUOX1    | 6.856845962 | Tumor_G2 |
| 11830 | DUOXA1   | 6.766591661 | Tumor_G2 |
| 11831 | DUOX2    | 7.459693242 | Tumor_G2 |
| 11832 | DUOXA2   | 5.000093066 | Tumor_G2 |
| 11833 | NDUFA1   | 8.031953693 | Tumor_G2 |
| 11834 | NDUFA2   | 6.765375757 | Tumor_G2 |
| 11835 | NDUFA8   | 7.054476965 | Tumor_G2 |
| 11836 | NDUFB1   | 5.355641927 | Tumor_G2 |
| 11837 | NDUFB10  | 7.593140742 | Tumor_G2 |
| 11838 | NDUFB2   | 6.501638639 | Tumor_G2 |



|       |          |             |          |
|-------|----------|-------------|----------|
| 11839 | NDUFB3   | 6.090001002 | Tumor_G2 |
| 11840 | NDUFB7   | 8.523667699 | Tumor_G2 |
| 11841 | CYC1     | 7.044647135 | Tumor_G2 |
| 11842 | ETFB     | 5.193927969 | Tumor_G2 |
| 11843 | UQCR10   | 6.931631424 | Tumor_G2 |
| 11844 | UQCRQ    | 6.986058198 | Tumor_G2 |
| 11845 | UQCC3    | 4.181296821 | Tumor_G2 |
| 11846 | COX15    | 5.284847907 | Tumor_G2 |
| 11847 | COX5A    | 7.088350625 | Tumor_G2 |
| 11848 | COX6B1   | 8.627059431 | Tumor_G2 |
| 11849 | COX6C    | 6.418608117 | Tumor_G2 |
| 11850 | COX7A2   | 6.791968063 | Tumor_G2 |
| 11851 | COX7B    | 5.877695088 | Tumor_G2 |
| 11852 | COX8A    | 9.483309347 | Tumor_G2 |
| 11853 | SCO1     | 3.166531378 | Tumor_G2 |
| 11854 | SURF1    | 6.075688324 | Tumor_G2 |
| 11855 | ATP6V1E1 | 6.487478785 | Tumor_G2 |
| 11856 | DLAT     | 5.287109916 | Tumor_G2 |
| 11857 | PDC      | 0.243734881 | Tumor_G2 |
| 11858 | SUCLG2   | 6.785062389 | Tumor_G2 |
| 11859 | SLC25A5  | 7.797498642 | Tumor_G2 |
| 11860 | UCP2     | 9.013244019 | Tumor_G2 |
| 11861 | SOD2     | 4.170980701 | Tumor_G2 |
| 11862 | NOX4     | 1.595214144 | Tumor_G2 |
| 11863 | DUOX1    | 6.861441218 | Tumor_G2 |
| 11864 | DUOXA1   | 6.830095683 | Tumor_G2 |
| 11865 | DUOX2    | 8.387200535 | Tumor_G2 |
| 11866 | DUOXA2   | 5.384699154 | Tumor_G2 |
| 11867 | NDUFA1   | 8.014932106 | Tumor_G2 |
| 11868 | NDUFA2   | 6.742387996 | Tumor_G2 |
| 11869 | NDUFA8   | 7.3499137   | Tumor_G2 |
| 11870 | NDUFB1   | 5.803238974 | Tumor_G2 |
| 11871 | NDUFB10  | 7.787658756 | Tumor_G2 |
| 11872 | NDUFB2   | 6.612464262 | Tumor_G2 |
| 11873 | NDUFB3   | 6.661266463 | Tumor_G2 |
| 11874 | NDUFB7   | 8.904100616 | Tumor_G2 |
| 11875 | CYC1     | 7.421211241 | Tumor_G2 |
| 11876 | ETFB     | 5.278785959 | Tumor_G2 |
| 11877 | UQCR10   | 7.739520861 | Tumor_G2 |
| 11878 | UQCRQ    | 7.382282739 | Tumor_G2 |

|       |          |             |          |
|-------|----------|-------------|----------|
| 11879 | UQCC3    | 4.778332322 | Tumor_G2 |
| 11880 | COX15    | 5.446192789 | Tumor_G2 |
| 11881 | COX5A    | 7.182646632 | Tumor_G2 |
| 11882 | COX6B1   | 8.448839682 | Tumor_G2 |
| 11883 | COX6C    | 6.569793441 | Tumor_G2 |
| 11884 | COX7A2   | 7.003984772 | Tumor_G2 |
| 11885 | COX7B    | 5.86455967  | Tumor_G2 |
| 11886 | COX8A    | 9.764907564 | Tumor_G2 |
| 11887 | SCO1     | 4.333276065 | Tumor_G2 |
| 11888 | SURF1    | 6.6528492   | Tumor_G2 |
| 11889 | ATP6V1E1 | 6.868650608 | Tumor_G2 |
| 11890 | DLAT     | 5.457503538 | Tumor_G2 |
| 11891 | PDC      | 0.058466614 | Tumor_G2 |
| 11892 | SUCLG2   | 6.583948993 | Tumor_G2 |
| 11893 | SLC25A5  | 8.543452737 | Tumor_G2 |
| 11894 | UCP2     | 7.776417843 | Tumor_G2 |
| 11895 | SOD2     | 4.450176087 | Tumor_G2 |
| 11896 | NOX4     | 1.989363046 | Tumor_G2 |
| 11897 | DUOX1    | 7.439035264 | Tumor_G2 |
| 11898 | DUOXA1   | 7.31554154  | Tumor_G2 |
| 11899 | DUOX2    | 9.382672893 | Tumor_G2 |
| 11900 | DUOXA2   | 6.81065363  | Tumor_G2 |
| 11901 | NDUFA1   | 7.999567403 | Tumor_G2 |
| 11902 | NDUFA2   | 7.111834171 | Tumor_G2 |
| 11903 | NDUFA8   | 7.110015477 | Tumor_G2 |
| 11904 | NDUFB1   | 5.932293097 | Tumor_G2 |
| 11905 | NDUFB10  | 7.621373204 | Tumor_G2 |
| 11906 | NDUFB2   | 6.707102072 | Tumor_G2 |
| 11907 | NDUFB3   | 6.280692652 | Tumor_G2 |
| 11908 | NDUFB7   | 8.621104586 | Tumor_G2 |
| 11909 | CYC1     | 7.236033353 | Tumor_G2 |
| 11910 | ETFB     | 4.707366427 | Tumor_G2 |
| 11911 | UQCR10   | 7.755991952 | Tumor_G2 |
| 11912 | UQCRQ    | 7.320485825 | Tumor_G2 |
| 11913 | UQCC3    | 4.505347767 | Tumor_G2 |
| 11914 | COX15    | 4.56990773  | Tumor_G2 |
| 11915 | COX5A    | 7.610499576 | Tumor_G2 |
| 11916 | COX6B1   | 9.157185234 | Tumor_G2 |
| 11917 | COX6C    | 6.601003675 | Tumor_G2 |
| 11918 | COX7A2   | 7.153174318 | Tumor_G2 |

|       |          |             |          |
|-------|----------|-------------|----------|
| 11919 | COX7B    | 6.182768522 | Tumor_G2 |
| 11920 | COX8A    | 9.88559185  | Tumor_G2 |
| 11921 | SCO1     | 3.097482908 | Tumor_G2 |
| 11922 | SURF1    | 6.662763977 | Tumor_G2 |
| 11923 | ATP6V1E1 | 7.596207105 | Tumor_G2 |
| 11924 | DLAT     | 4.867311994 | Tumor_G2 |
| 11925 | PDC      | 0.043881815 | Tumor_G2 |
| 11926 | SUCLG2   | 6.326023319 | Tumor_G2 |
| 11927 | SLC25A5  | 9.229925005 | Tumor_G2 |
| 11928 | UCP2     | 7.243467387 | Tumor_G2 |
| 11929 | SOD2     | 4.651731946 | Tumor_G2 |
| 11930 | NOX4     | 0.820942121 | Tumor_G2 |
| 11931 | DUOX1    | 4.200903648 | Tumor_G2 |
| 11932 | DUOXA1   | 4.519676209 | Tumor_G2 |
| 11933 | DUOX2    | 3.215424026 | Tumor_G2 |
| 11934 | DUOXA2   | 1.248711509 | Tumor_G2 |
| 11935 | NDUFA1   | 8.015386927 | Tumor_G2 |
| 11936 | NDUFA2   | 6.899696615 | Tumor_G2 |
| 11937 | NDUFA8   | 7.098909374 | Tumor_G2 |
| 11938 | NDUFB1   | 5.674845305 | Tumor_G2 |
| 11939 | NDUFB10  | 7.718997162 | Tumor_G2 |
| 11940 | NDUFB2   | 6.770093583 | Tumor_G2 |
| 11941 | NDUFB3   | 6.24105358  | Tumor_G2 |
| 11942 | NDUFB7   | 8.690727043 | Tumor_G2 |
| 11943 | CYC1     | 7.189726336 | Tumor_G2 |
| 11944 | ETFB     | 5.175723753 | Tumor_G2 |
| 11945 | UQCR10   | 7.674331178 | Tumor_G2 |
| 11946 | UQCRQ    | 7.223267452 | Tumor_G2 |
| 11947 | UQCC3    | 4.471625645 | Tumor_G2 |
| 11948 | COX15    | 4.852128685 | Tumor_G2 |
| 11949 | COX5A    | 7.259606759 | Tumor_G2 |
| 11950 | COX6B1   | 8.735932741 | Tumor_G2 |
| 11951 | COX6C    | 6.552110748 | Tumor_G2 |
| 11952 | COX7A2   | 6.996247491 | Tumor_G2 |
| 11953 | COX7B    | 6.053222731 | Tumor_G2 |
| 11954 | COX8A    | 9.469269104 | Tumor_G2 |
| 11955 | SCO1     | 3.065785717 | Tumor_G2 |
| 11956 | SURF1    | 6.151991178 | Tumor_G2 |
| 11957 | ATP6V1E1 | 7.511516286 | Tumor_G2 |
| 11958 | DLAT     | 5.097980799 | Tumor_G2 |

|       |          |             |          |
|-------|----------|-------------|----------|
| 11959 | PDC      | 0.104617516 | Tumor_G2 |
| 11960 | SUCLG2   | 6.420179774 | Tumor_G2 |
| 11961 | SLC25A5  | 8.61707328  | Tumor_G2 |
| 11962 | UCP2     | 8.093253496 | Tumor_G2 |
| 11963 | SOD2     | 4.506172317 | Tumor_G2 |
| 11964 | NOX4     | 1.913447246 | Tumor_G2 |
| 11965 | DUOX1    | 6.018956456 | Tumor_G2 |
| 11966 | DUOXA1   | 6.052822131 | Tumor_G2 |
| 11967 | DUOX2    | 5.482578814 | Tumor_G2 |
| 11968 | DUOXA2   | 2.842145731 | Tumor_G2 |
| 11969 | NDUFA1   | 7.80362166  | Tumor_G2 |
| 11970 | NDUFA2   | 6.502217264 | Tumor_G2 |
| 11971 | NDUFA8   | 7.168097318 | Tumor_G2 |
| 11972 | NDUFB1   | 5.423643553 | Tumor_G2 |
| 11973 | NDUFB10  | 7.517927635 | Tumor_G2 |
| 11974 | NDUFB2   | 6.907279886 | Tumor_G2 |
| 11975 | NDUFB3   | 6.458079813 | Tumor_G2 |
| 11976 | NDUFB7   | 8.348737953 | Tumor_G2 |
| 11977 | CYC1     | 6.887244468 | Tumor_G2 |
| 11978 | ETFB     | 5.530971966 | Tumor_G2 |
| 11979 | UQCR10   | 7.627601304 | Tumor_G2 |
| 11980 | UQCRQ    | 6.946076894 | Tumor_G2 |
| 11981 | UQCC3    | 4.462952633 | Tumor_G2 |
| 11982 | COX15    | 4.999002388 | Tumor_G2 |
| 11983 | COX5A    | 7.017353875 | Tumor_G2 |
| 11984 | COX6B1   | 8.700973552 | Tumor_G2 |
| 11985 | COX6C    | 6.367199198 | Tumor_G2 |
| 11986 | COX7A2   | 6.681015564 | Tumor_G2 |
| 11987 | COX7B    | 6.030830196 | Tumor_G2 |
| 11988 | COX8A    | 9.530230153 | Tumor_G2 |
| 11989 | SCO1     | 3.469975046 | Tumor_G2 |
| 11990 | SURF1    | 6.654381143 | Tumor_G2 |
| 11991 | ATP6V1E1 | 7.020828166 | Tumor_G2 |
| 11992 | DLAT     | 5.157323546 | Tumor_G2 |
| 11993 | PDC      | 0.200974441 | Tumor_G2 |
| 11994 | SUCLG2   | 6.452601036 | Tumor_G2 |
| 11995 | SLC25A5  | 8.162771262 | Tumor_G2 |
| 11996 | UCP2     | 9.430250626 | Tumor_G2 |
| 11997 | SOD2     | 4.579929095 | Tumor_G2 |
| 11998 | NOX4     | 2.001501404 | Tumor_G2 |

|       |          |             |          |
|-------|----------|-------------|----------|
| 11999 | DUOX1    | 6.939753151 | Tumor_G2 |
| 12000 | DUOXA1   | 6.973472087 | Tumor_G2 |
| 12001 | DUOX2    | 8.010578299 | Tumor_G2 |
| 12002 | DUOXA2   | 5.997486161 | Tumor_G2 |
| 12003 | NDUFA1   | 8.045864463 | Tumor_G2 |
| 12004 | NDUFA2   | 7.075413101 | Tumor_G2 |
| 12005 | NDUFA8   | 7.549883365 | Tumor_G2 |
| 12006 | NDUFB1   | 5.792756064 | Tumor_G2 |
| 12007 | NDUFB10  | 7.922561305 | Tumor_G2 |
| 12008 | NDUFB2   | 6.861027558 | Tumor_G2 |
| 12009 | NDUFB3   | 6.198816945 | Tumor_G2 |
| 12010 | NDUFB7   | 9.163522822 | Tumor_G2 |
| 12011 | CYC1     | 7.17815005  | Tumor_G2 |
| 12012 | ETFB     | 5.871422847 | Tumor_G2 |
| 12013 | UQCR10   | 7.353302887 | Tumor_G2 |
| 12014 | UQCRQ    | 7.570815235 | Tumor_G2 |
| 12015 | UQCC3    | 5.247607203 | Tumor_G2 |
| 12016 | COX15    | 4.981268751 | Tumor_G2 |
| 12017 | COX5A    | 7.11469541  | Tumor_G2 |
| 12018 | COX6B1   | 8.956837473 | Tumor_G2 |
| 12019 | COX6C    | 6.795905226 | Tumor_G2 |
| 12020 | COX7A2   | 7.079955512 | Tumor_G2 |
| 12021 | COX7B    | 6.240855341 | Tumor_G2 |
| 12022 | COX8A    | 10.23945446 | Tumor_G2 |
| 12023 | SCO1     | 3.189673901 | Tumor_G2 |
| 12024 | SURF1    | 7.003353983 | Tumor_G2 |
| 12025 | ATP6V1E1 | 6.582587064 | Tumor_G2 |
| 12026 | DLAT     | 4.981040169 | Tumor_G2 |
| 12027 | PDC      | 0.063425927 | Tumor_G2 |
| 12028 | SUCLG2   | 6.198692095 | Tumor_G2 |
| 12029 | SLC25A5  | 8.027567674 | Tumor_G2 |
| 12030 | UCP2     | 9.347937155 | Tumor_G2 |
| 12031 | SOD2     | 4.096447082 | Tumor_G2 |
| 12032 | NOX4     | 2.21499636  | Tumor_G2 |
| 12033 | DUOX1    | 7.916095872 | Tumor_G2 |
| 12034 | DUOXA1   | 7.907417892 | Tumor_G2 |
| 12035 | DUOX2    | 8.866700763 | Tumor_G2 |
| 12036 | DUOXA2   | 6.803786023 | Tumor_G2 |
| 12037 | NDUFA1   | 7.919698513 | Tumor_G2 |
| 12038 | NDUFA2   | 7.078507595 | Tumor_G2 |

|       |          |             |          |
|-------|----------|-------------|----------|
| 12039 | NDUFA8   | 7.524281755 | Tumor_G2 |
| 12040 | NDUFB1   | 5.847213697 | Tumor_G2 |
| 12041 | NDUFB10  | 7.698752704 | Tumor_G2 |
| 12042 | NDUFB2   | 7.388067432 | Tumor_G2 |
| 12043 | NDUFB3   | 6.700745756 | Tumor_G2 |
| 12044 | NDUFB7   | 8.968022326 | Tumor_G2 |
| 12045 | CYC1     | 7.466088908 | Tumor_G2 |
| 12046 | ETFB     | 5.474680127 | Tumor_G2 |
| 12047 | UQCR10   | 8.056723622 | Tumor_G2 |
| 12048 | UQCRQ    | 7.583308768 | Tumor_G2 |
| 12049 | UQCC3    | 4.822562969 | Tumor_G2 |
| 12050 | COX15    | 5.542132092 | Tumor_G2 |
| 12051 | COX5A    | 7.319770051 | Tumor_G2 |
| 12052 | COX6B1   | 8.79234353  | Tumor_G2 |
| 12053 | COX6C    | 6.748145969 | Tumor_G2 |
| 12054 | COX7A2   | 7.060717738 | Tumor_G2 |
| 12055 | COX7B    | 6.535593809 | Tumor_G2 |
| 12056 | COX8A    | 10.1394848  | Tumor_G2 |
| 12057 | SCO1     | 4.227438233 | Tumor_G2 |
| 12058 | SURF1    | 7.063783062 | Tumor_G2 |
| 12059 | ATP6V1E1 | 7.090657331 | Tumor_G2 |
| 12060 | DLAT     | 5.695003387 | Tumor_G2 |
| 12061 | PDC      | 0.0623983   | Tumor_G2 |
| 12062 | SUCLG2   | 6.891380821 | Tumor_G2 |
| 12063 | SLC25A5  | 8.52456769  | Tumor_G2 |
| 12064 | UCP2     | 8.276942137 | Tumor_G2 |
| 12065 | SOD2     | 4.938240572 | Tumor_G2 |
| 12066 | NOX4     | 1.395641916 | Tumor_G2 |
| 12067 | DUOX1    | 8.323279963 | Tumor_G2 |
| 12068 | DUOXA1   | 7.501251875 | Tumor_G2 |
| 12069 | DUOX2    | 9.440209076 | Tumor_G2 |
| 12070 | DUOXA2   | 7.247887137 | Tumor_G2 |
| 12071 | NDUFA1   | 7.663267578 | Tumor_G2 |
| 12072 | NDUFA2   | 6.723865651 | Tumor_G2 |
| 12073 | NDUFA8   | 7.246029854 | Tumor_G2 |
| 12074 | NDUFB1   | 5.37389339  | Tumor_G2 |
| 12075 | NDUFB10  | 7.353791757 | Tumor_G2 |
| 12076 | NDUFB2   | 6.275794009 | Tumor_G2 |
| 12077 | NDUFB3   | 6.221631103 | Tumor_G2 |
| 12078 | NDUFB7   | 8.642126259 | Tumor_G2 |

|       |          |             |          |
|-------|----------|-------------|----------|
| 12079 | CYC1     | 7.113953462 | Tumor_G2 |
| 12080 | ETFB     | 5.405112974 | Tumor_G2 |
| 12081 | UQCR10   | 7.56493742  | Tumor_G2 |
| 12082 | UQCRQ    | 7.172942104 | Tumor_G2 |
| 12083 | UQCC3    | 4.542540053 | Tumor_G2 |
| 12084 | COX15    | 4.8434723   | Tumor_G2 |
| 12085 | COX5A    | 7.136639171 | Tumor_G2 |
| 12086 | COX6B1   | 8.743465588 | Tumor_G2 |
| 12087 | COX6C    | 6.384457151 | Tumor_G2 |
| 12088 | COX7A2   | 6.796558886 | Tumor_G2 |
| 12089 | COX7B    | 6.108326606 | Tumor_G2 |
| 12090 | COX8A    | 9.208848267 | Tumor_G2 |
| 12091 | SCO1     | 3.300104945 | Tumor_G2 |
| 12092 | SURF1    | 6.409012829 | Tumor_G2 |
| 12093 | ATP6V1E1 | 6.837388575 | Tumor_G2 |
| 12094 | DLAT     | 5.416880218 | Tumor_G2 |
| 12095 | PDC      | 0.126466658 | Tumor_G2 |
| 12096 | SUCLG2   | 6.112405945 | Tumor_G2 |
| 12097 | SLC25A5  | 8.216773017 | Tumor_G2 |
| 12098 | UCP2     | 9.138798994 | Tumor_G2 |
| 12099 | SOD2     | 4.362187645 | Tumor_G2 |
| 12100 | NOX4     | 3.412699022 | Tumor_G2 |
| 12101 | DUOX1    | 6.163791974 | Tumor_G2 |
| 12102 | DUOXA1   | 6.455969182 | Tumor_G2 |
| 12103 | DUOX2    | 7.129905478 | Tumor_G2 |
| 12104 | DUOXA2   | 6.07735064  | Tumor_G2 |
| 12105 | NDUFA1   | 8.061333215 | Tumor_G2 |
| 12106 | NDUFA2   | 6.70634124  | Tumor_G2 |
| 12107 | NDUFA8   | 7.389328366 | Tumor_G2 |
| 12108 | NDUFB1   | 5.458537526 | Tumor_G2 |
| 12109 | NDUFB10  | 7.777736208 | Tumor_G2 |
| 12110 | NDUFB2   | 6.680847333 | Tumor_G2 |
| 12111 | NDUFB3   | 6.374885223 | Tumor_G2 |
| 12112 | NDUFB7   | 8.219435877 | Tumor_G2 |
| 12113 | CYC1     | 6.98009877  | Tumor_G2 |
| 12114 | ETFB     | 5.065520682 | Tumor_G2 |
| 12115 | UQCR10   | 7.635307408 | Tumor_G2 |
| 12116 | UQCRQ    | 7.229031198 | Tumor_G2 |
| 12117 | UQCC3    | 4.368547794 | Tumor_G2 |
| 12118 | COX15    | 5.138204895 | Tumor_G2 |

|       |          |             |          |
|-------|----------|-------------|----------|
| 12119 | COX5A    | 7.091592014 | Tumor_G2 |
| 12120 | COX6B1   | 8.611672976 | Tumor_G2 |
| 12121 | COX6C    | 6.473949169 | Tumor_G2 |
| 12122 | COX7A2   | 6.853116302 | Tumor_G2 |
| 12123 | COX7B    | 6.357465679 | Tumor_G2 |
| 12124 | COX8A    | 9.661075646 | Tumor_G2 |
| 12125 | SCO1     | 3.553026903 | Tumor_G2 |
| 12126 | SURF1    | 6.567405745 | Tumor_G2 |
| 12127 | ATP6V1E1 | 6.610816623 | Tumor_G2 |
| 12128 | DLAT     | 5.484563361 | Tumor_G2 |
| 12129 | PDC      | 0.403775208 | Tumor_G2 |
| 12130 | SUCLG2   | 6.32952812  | Tumor_G2 |
| 12131 | SLC25A5  | 8.130039257 | Tumor_G2 |
| 12132 | UCP2     | 6.864729833 | Tumor_G2 |
| 12133 | SOD2     | 4.661982579 | Tumor_G2 |
| 12134 | NOX4     | 2.696020205 | Tumor_G2 |
| 12135 | DUOX1    | 7.719144952 | Tumor_G2 |
| 12136 | DUOXA1   | 7.362501201 | Tumor_G2 |
| 12137 | DUOX2    | 8.942024372 | Tumor_G2 |
| 12138 | DUOXA2   | 6.79299222  | Tumor_G2 |
| 12139 | NDUFA1   | 8.305766741 | Tumor_G2 |
| 12140 | NDUFA2   | 7.323306565 | Tumor_G2 |
| 12141 | NDUFA8   | 7.308820586 | Tumor_G2 |
| 12142 | NDUFB1   | 5.983751909 | Tumor_G2 |
| 12143 | NDUFB10  | 7.916895305 | Tumor_G2 |
| 12144 | NDUFB2   | 6.781075699 | Tumor_G2 |
| 12145 | NDUFB3   | 6.187090042 | Tumor_G2 |
| 12146 | NDUFB7   | 9.161344662 | Tumor_G2 |
| 12147 | CYC1     | 6.924857595 | Tumor_G2 |
| 12148 | ETFB     | 5.893040045 | Tumor_G2 |
| 12149 | UQCR10   | 7.241522758 | Tumor_G2 |
| 12150 | UQCRQ    | 7.81533904  | Tumor_G2 |
| 12151 | UQCC3    | 5.137701527 | Tumor_G2 |
| 12152 | COX15    | 4.331650623 | Tumor_G2 |
| 12153 | COX5A    | 7.034104188 | Tumor_G2 |
| 12154 | COX6B1   | 9.225944645 | Tumor_G2 |
| 12155 | COX6C    | 6.553699049 | Tumor_G2 |
| 12156 | COX7A2   | 6.9324063   | Tumor_G2 |
| 12157 | COX7B    | 6.103663887 | Tumor_G2 |
| 12158 | COX8A    | 9.946183945 | Tumor_G2 |



|       |          |             |          |
|-------|----------|-------------|----------|
| 12159 | SCO1     | 2.583899445 | Tumor_G2 |
| 12160 | SURF1    | 6.930225275 | Tumor_G2 |
| 12161 | ATP6V1E1 | 5.952741901 | Tumor_G2 |
| 12162 | DLAT     | 3.929665687 | Tumor_G2 |
| 12163 | PDC      | 0           | Tumor_G2 |
| 12164 | SUCLG2   | 5.334343929 | Tumor_G2 |
| 12165 | SLC25A5  | 7.72207586  | Tumor_G2 |
| 12166 | UCP2     | 8.248739867 | Tumor_G2 |
| 12167 | SOD2     | 4.714221393 | Tumor_G2 |
| 12168 | NOX4     | 2.338433664 | Tumor_G2 |
| 12169 | DUOX1    | 6.457738047 | Tumor_G2 |
| 12170 | DUOXA1   | 7.093495085 | Tumor_G2 |
| 12171 | DUOX2    | 7.057168721 | Tumor_G2 |
| 12172 | DUOXA2   | 6.095348056 | Tumor_G2 |
| 12173 | NDUFA1   | 8.008168981 | Tumor_G2 |
| 12174 | NDUFA2   | 7.026932039 | Tumor_G2 |
| 12175 | NDUFA8   | 7.137384682 | Tumor_G2 |
| 12176 | NDUFB1   | 5.765153915 | Tumor_G2 |
| 12177 | NDUFB10  | 7.6262407   | Tumor_G2 |
| 12178 | NDUFB2   | 6.712149041 | Tumor_G2 |
| 12179 | NDUFB3   | 6.523528986 | Tumor_G2 |
| 12180 | NDUFB7   | 8.227775123 | Tumor_G2 |
| 12181 | CYC1     | 7.197454334 | Tumor_G2 |
| 12182 | ETFB     | 5.145615007 | Tumor_G2 |
| 12183 | UQCR10   | 7.678773178 | Tumor_G2 |
| 12184 | UQCRQ    | 7.343765266 | Tumor_G2 |
| 12185 | UQCC3    | 4.238707275 | Tumor_G2 |
| 12186 | COX15    | 5.055752771 | Tumor_G2 |
| 12187 | COX5A    | 7.081414964 | Tumor_G2 |
| 12188 | COX6B1   | 8.727726119 | Tumor_G2 |
| 12189 | COX6C    | 6.331677554 | Tumor_G2 |
| 12190 | COX7A2   | 6.846029736 | Tumor_G2 |
| 12191 | COX7B    | 6.116723905 | Tumor_G2 |
| 12192 | COX8A    | 9.706446067 | Tumor_G2 |
| 12193 | SCO1     | 3.153863546 | Tumor_G2 |
| 12194 | SURF1    | 6.012882954 | Tumor_G2 |
| 12195 | ATP6V1E1 | 7.420046927 | Tumor_G2 |
| 12196 | DLAT     | 5.334897173 | Tumor_G2 |
| 12197 | PDC      | 0           | Tumor_G2 |
| 12198 | SUCLG2   | 6.590122359 | Tumor_G2 |

|       |          |             |          |
|-------|----------|-------------|----------|
| 12199 | SLC25A5  | 8.441383468 | Tumor_G2 |
| 12200 | UCP2     | 6.880884961 | Tumor_G2 |
| 12201 | SOD2     | 4.706477781 | Tumor_G2 |
| 12202 | NOX4     | 1.488289844 | Tumor_G2 |
| 12203 | DUOX1    | 6.756609479 | Tumor_G2 |
| 12204 | DUOXA1   | 6.611301595 | Tumor_G2 |
| 12205 | DUOX2    | 6.43667225  | Tumor_G2 |
| 12206 | DUOXA2   | 4.687615724 | Tumor_G2 |
| 12207 | NDUFA1   | 7.875603935 | Tumor_G2 |
| 12208 | NDUFA2   | 6.914049364 | Tumor_G2 |
| 12209 | NDUFA8   | 7.281635001 | Tumor_G2 |
| 12210 | NDUFB1   | 5.936433089 | Tumor_G2 |
| 12211 | NDUFB10  | 7.712192687 | Tumor_G2 |
| 12212 | NDUFB2   | 6.651323811 | Tumor_G2 |
| 12213 | NDUFB3   | 6.349546118 | Tumor_G2 |
| 12214 | NDUFB7   | 8.872186444 | Tumor_G2 |
| 12215 | CYC1     | 7.114407646 | Tumor_G2 |
| 12216 | ETFB     | 5.252817252 | Tumor_G2 |
| 12217 | UQCR10   | 7.757180841 | Tumor_G2 |
| 12218 | UQCRQ    | 7.531824926 | Tumor_G2 |
| 12219 | UQCC3    | 4.862695866 | Tumor_G2 |
| 12220 | COX15    | 4.996564931 | Tumor_G2 |
| 12221 | COX5A    | 7.055551964 | Tumor_G2 |
| 12222 | COX6B1   | 8.53941718  | Tumor_G2 |
| 12223 | COX6C    | 6.560283551 | Tumor_G2 |
| 12224 | COX7A2   | 6.93097583  | Tumor_G2 |
| 12225 | COX7B    | 6.293129389 | Tumor_G2 |
| 12226 | COX8A    | 9.65906388  | Tumor_G2 |
| 12227 | SCO1     | 3.468616969 | Tumor_G2 |
| 12228 | SURF1    | 6.35289374  | Tumor_G2 |
| 12229 | ATP6V1E1 | 6.96883321  | Tumor_G2 |
| 12230 | DLAT     | 5.266501869 | Tumor_G2 |
| 12231 | PDC      | 0.329951197 | Tumor_G2 |
| 12232 | SUCLG2   | 5.962973371 | Tumor_G2 |
| 12233 | SLC25A5  | 8.291146456 | Tumor_G2 |
| 12234 | UCP2     | 8.033200402 | Tumor_G2 |
| 12235 | SOD2     | 6.15925988  | Tumor_G2 |
| 12236 | NOX4     | 2.991667515 | Tumor_G2 |
| 12237 | DUOX1    | 7.056479304 | Tumor_G2 |
| 12238 | DUOXA1   | 7.159480084 | Tumor_G2 |

|       |          |             |          |
|-------|----------|-------------|----------|
| 12239 | DUOX2    | 7.341961879 | Tumor_G2 |
| 12240 | DUOXA2   | 5.742604205 | Tumor_G2 |
| 12241 | NDUFA1   | 8.103789558 | Tumor_G2 |
| 12242 | NDUFA2   | 6.931647894 | Tumor_G2 |
| 12243 | NDUFA8   | 7.353483728 | Tumor_G2 |
| 12244 | NDUFB1   | 5.714670915 | Tumor_G2 |
| 12245 | NDUFB10  | 7.869350732 | Tumor_G2 |
| 12246 | NDUFB2   | 6.936268114 | Tumor_G2 |
| 12247 | NDUFB3   | 6.438791128 | Tumor_G2 |
| 12248 | NDUFB7   | 9.152661037 | Tumor_G2 |
| 12249 | CYC1     | 7.20733301  | Tumor_G2 |
| 12250 | ETFB     | 5.682484698 | Tumor_G2 |
| 12251 | UQCR10   | 7.812037116 | Tumor_G2 |
| 12252 | UQCRQ    | 7.415144768 | Tumor_G2 |
| 12253 | UQCC3    | 5.034557134 | Tumor_G2 |
| 12254 | COX15    | 5.050022015 | Tumor_G2 |
| 12255 | COX5A    | 7.073655839 | Tumor_G2 |
| 12256 | COX6B1   | 8.877594742 | Tumor_G2 |
| 12257 | COX6C    | 6.546011683 | Tumor_G2 |
| 12258 | COX7A2   | 7.096515477 | Tumor_G2 |
| 12259 | COX7B    | 6.232449236 | Tumor_G2 |
| 12260 | COX8A    | 9.888579371 | Tumor_G2 |
| 12261 | SCO1     | 3.275255399 | Tumor_G2 |
| 12262 | SURF1    | 7.054170624 | Tumor_G2 |
| 12263 | ATP6V1E1 | 7.11746483  | Tumor_G2 |
| 12264 | DLAT     | 5.040008707 | Tumor_G2 |
| 12265 | PDC      | 0.066734633 | Tumor_G2 |
| 12266 | SUCLG2   | 6.227227935 | Tumor_G2 |
| 12267 | SLC25A5  | 8.113808166 | Tumor_G2 |
| 12268 | UCP2     | 9.136231788 | Tumor_G2 |
| 12269 | SOD2     | 4.941013745 | Tumor_G2 |
| 12270 | NOX4     | 1.826916071 | Tumor_G2 |
| 12271 | DUOX1    | 7.02757945  | Tumor_G2 |
| 12272 | DUOXA1   | 6.971772713 | Tumor_G2 |
| 12273 | DUOX2    | 7.448166227 | Tumor_G2 |
| 12274 | DUOXA2   | 5.511853905 | Tumor_G2 |
| 12275 | NDUFA1   | 8.308722084 | Tumor_G2 |
| 12276 | NDUFA2   | 7.095387702 | Tumor_G2 |
| 12277 | NDUFA8   | 7.302000929 | Tumor_G2 |
| 12278 | NDUFB1   | 5.858375203 | Tumor_G2 |

|       |          |             |          |
|-------|----------|-------------|----------|
| 12279 | NDUFB10  | 7.956707043 | Tumor_G2 |
| 12280 | NDUFB2   | 7.181550965 | Tumor_G2 |
| 12281 | NDUFB3   | 6.546129733 | Tumor_G2 |
| 12282 | NDUFB7   | 8.851342202 | Tumor_G2 |
| 12283 | CYC1     | 7.560646143 | Tumor_G2 |
| 12284 | ETFB     | 5.026801932 | Tumor_G2 |
| 12285 | UQCR10   | 7.843723458 | Tumor_G2 |
| 12286 | UQCRQ    | 7.493424223 | Tumor_G2 |
| 12287 | UQCC3    | 4.705202645 | Tumor_G2 |
| 12288 | COX15    | 5.532678765 | Tumor_G2 |
| 12289 | COX5A    | 7.615792955 | Tumor_G2 |
| 12290 | COX6B1   | 8.97838409  | Tumor_G2 |
| 12291 | COX6C    | 6.739364198 | Tumor_G2 |
| 12292 | COX7A2   | 7.090053007 | Tumor_G2 |
| 12293 | COX7B    | 6.556105102 | Tumor_G2 |
| 12294 | COX8A    | 9.733762325 | Tumor_G2 |
| 12295 | SCO1     | 3.51581965  | Tumor_G2 |
| 12296 | SURF1    | 6.786904034 | Tumor_G2 |
| 12297 | ATP6V1E1 | 7.554450893 | Tumor_G2 |
| 12298 | DLAT     | 5.495508034 | Tumor_G2 |
| 12299 | PDC      | 0           | Tumor_G2 |
| 12300 | SUCLG2   | 6.953902342 | Tumor_G2 |
| 12301 | SLC25A5  | 9.301305178 | Tumor_G2 |
| 12302 | UCP2     | 7.558319107 | Tumor_G2 |
| 12303 | SOD2     | 5.180948144 | Tumor_G2 |
| 12304 | NOX4     | 1.587668675 | Tumor_G2 |
| 12305 | DUOX1    | 6.165191077 | Tumor_G2 |
| 12306 | DUOXA1   | 6.130745626 | Tumor_G2 |
| 12307 | DUOX2    | 6.465856302 | Tumor_G2 |
| 12308 | DUOXA2   | 4.772372841 | Tumor_G2 |
| 12309 | NDUFA1   | 8.259081194 | Tumor_G2 |
| 12310 | NDUFA2   | 7.215084414 | Tumor_G2 |
| 12311 | NDUFA8   | 7.557116017 | Tumor_G2 |
| 12312 | NDUFB1   | 5.979687834 | Tumor_G2 |
| 12313 | NDUFB10  | 7.945857397 | Tumor_G2 |
| 12314 | NDUFB2   | 6.565360005 | Tumor_G2 |
| 12315 | NDUFB3   | 6.137810798 | Tumor_G2 |
| 12316 | NDUFB7   | 8.943471483 | Tumor_G2 |
| 12317 | CYC1     | 7.218630074 | Tumor_G2 |
| 12318 | ETFB     | 5.923336562 | Tumor_G2 |

|       |          |             |          |
|-------|----------|-------------|----------|
| 12319 | UQCR10   | 7.416719409 | Tumor_G2 |
| 12320 | UQCRQ    | 7.627959246 | Tumor_G2 |
| 12321 | UQCC3    | 4.861816301 | Tumor_G2 |
| 12322 | COX15    | 4.819240203 | Tumor_G2 |
| 12323 | COX5A    | 7.102269568 | Tumor_G2 |
| 12324 | COX6B1   | 8.969555923 | Tumor_G2 |
| 12325 | COX6C    | 6.717584493 | Tumor_G2 |
| 12326 | COX7A2   | 6.914473717 | Tumor_G2 |
| 12327 | COX7B    | 6.327541056 | Tumor_G2 |
| 12328 | COX8A    | 9.726164758 | Tumor_G2 |
| 12329 | SCO1     | 2.916245901 | Tumor_G2 |
| 12330 | SURF1    | 6.627207755 | Tumor_G2 |
| 12331 | ATP6V1E1 | 6.408310397 | Tumor_G2 |
| 12332 | DLAT     | 4.769719523 | Tumor_G2 |
| 12333 | PDC      | 0.050658877 | Tumor_G2 |
| 12334 | SUCLG2   | 6.234352633 | Tumor_G2 |
| 12335 | SLC25A5  | 7.482119877 | Tumor_G2 |
| 12336 | UCP2     | 9.225003702 | Tumor_G2 |
| 12337 | SOD2     | 4.208296612 | Tumor_G2 |
| 12338 | NOX4     | 2.463018127 | Tumor_G2 |
| 12339 | DUOX1    | 6.58189581  | Tumor_G2 |
| 12340 | DUOXA1   | 6.763243848 | Tumor_G2 |
| 12341 | DUOX2    | 7.839723932 | Tumor_G2 |
| 12342 | DUOXA2   | 5.727239443 | Tumor_G2 |
| 12343 | NDUFA1   | 7.928894041 | Tumor_G2 |
| 12344 | NDUFA2   | 6.52420685  | Tumor_G2 |
| 12345 | NDUFA8   | 7.025316785 | Tumor_G2 |
| 12346 | NDUFB1   | 5.786676646 | Tumor_G2 |
| 12347 | NDUFB10  | 7.430397168 | Tumor_G2 |
| 12348 | NDUFB2   | 6.457264068 | Tumor_G2 |
| 12349 | NDUFB3   | 6.284845441 | Tumor_G2 |
| 12350 | NDUFB7   | 8.644008033 | Tumor_G2 |
| 12351 | CYC1     | 6.777333063 | Tumor_G2 |
| 12352 | ETFB     | 5.303018282 | Tumor_G2 |
| 12353 | UQCR10   | 7.554555324 | Tumor_G2 |
| 12354 | UQCRQ    | 7.260184828 | Tumor_G2 |
| 12355 | UQCC3    | 4.469098018 | Tumor_G2 |
| 12356 | COX15    | 4.758248837 | Tumor_G2 |
| 12357 | COX5A    | 6.967415385 | Tumor_G2 |
| 12358 | COX6B1   | 8.514209714 | Tumor_G2 |

|       |          |             |          |
|-------|----------|-------------|----------|
| 12359 | COX6C    | 6.437645242 | Tumor_G2 |
| 12360 | COX7A2   | 6.769366262 | Tumor_G2 |
| 12361 | COX7B    | 5.985196048 | Tumor_G2 |
| 12362 | COX8A    | 9.250402983 | Tumor_G2 |
| 12363 | SCO1     | 3.372611826 | Tumor_G2 |
| 12364 | SURF1    | 6.621115091 | Tumor_G2 |
| 12365 | ATP6V1E1 | 7.030700644 | Tumor_G2 |
| 12366 | DLAT     | 5.167223941 | Tumor_G2 |
| 12367 | PDC      | 0.144695521 | Tumor_G2 |
| 12368 | SUCLG2   | 6.037210841 | Tumor_G2 |
| 12369 | SLC25A5  | 7.907348773 | Tumor_G2 |
| 12370 | UCP2     | 9.222532391 | Tumor_G2 |
| 12371 | SOD2     | 4.821580353 | Tumor_G2 |
| 12372 | NOX4     | 2.535245049 | Tumor_G2 |
| 12373 | DUOX1    | 6.997239193 | Tumor_G2 |
| 12374 | DUOXA1   | 7.199609967 | Tumor_G2 |
| 12375 | DUOX2    | 7.587410903 | Tumor_G2 |
| 12376 | DUOXA2   | 5.578696728 | Tumor_G2 |
| 12377 | NDUFA1   | 7.690319656 | Tumor_G2 |
| 12378 | NDUFA2   | 6.792140981 | Tumor_G2 |
| 12379 | NDUFA8   | 7.178544345 | Tumor_G2 |
| 12380 | NDUFB1   | 5.43509405  | Tumor_G2 |
| 12381 | NDUFB10  | 7.606152557 | Tumor_G2 |
| 12382 | NDUFB2   | 6.720394396 | Tumor_G2 |
| 12383 | NDUFB3   | 6.122378961 | Tumor_G2 |
| 12384 | NDUFB7   | 8.777840412 | Tumor_G2 |
| 12385 | CYC1     | 7.064030812 | Tumor_G2 |
| 12386 | ETFB     | 5.396536251 | Tumor_G2 |
| 12387 | UQCR10   | 7.573688652 | Tumor_G2 |
| 12388 | UQCRQ    | 7.237731502 | Tumor_G2 |
| 12389 | UQCC3    | 4.595716836 | Tumor_G2 |
| 12390 | COX15    | 5.01011337  | Tumor_G2 |
| 12391 | COX5A    | 6.985597907 | Tumor_G2 |
| 12392 | COX6B1   | 8.728758379 | Tumor_G2 |
| 12393 | COX6C    | 6.553844484 | Tumor_G2 |
| 12394 | COX7A2   | 6.825512429 | Tumor_G2 |
| 12395 | COX7B    | 6.052297074 | Tumor_G2 |
| 12396 | COX8A    | 9.392649273 | Tumor_G2 |
| 12397 | SCO1     | 3.442897431 | Tumor_G2 |
| 12398 | SURF1    | 6.768587908 | Tumor_G2 |

|       |          |             |          |
|-------|----------|-------------|----------|
| 12399 | ATP6V1E1 | 7.427370541 | Tumor_G2 |
| 12400 | DLAT     | 5.378332637 | Tumor_G2 |
| 12401 | PDC      | 0.103434158 | Tumor_G2 |
| 12402 | SUCLG2   | 6.895946385 | Tumor_G2 |
| 12403 | SLC25A5  | 8.496177972 | Tumor_G2 |
| 12404 | UCP2     | 8.427177385 | Tumor_G2 |
| 12405 | SOD2     | 5.591321568 | Tumor_G2 |
| 12406 | NOX4     | 2.430756679 | Tumor_G2 |
| 12407 | DUOX1    | 6.936702599 | Tumor_G2 |
| 12408 | DUOXA1   | 7.329352144 | Tumor_G2 |
| 12409 | DUOX2    | 7.593143231 | Tumor_G2 |
| 12410 | DUOXA2   | 5.467124129 | Tumor_G2 |
| 12411 | NDUFA1   | 7.770087721 | Tumor_G2 |
| 12412 | NDUFA2   | 6.711240242 | Tumor_G2 |
| 12413 | NDUFA8   | 6.969717032 | Tumor_G2 |
| 12414 | NDUFB1   | 5.541112401 | Tumor_G2 |
| 12415 | NDUFB10  | 7.51740867  | Tumor_G2 |
| 12416 | NDUFB2   | 6.585276284 | Tumor_G2 |
| 12417 | NDUFB3   | 6.082287823 | Tumor_G2 |
| 12418 | NDUFB7   | 8.641655738 | Tumor_G2 |
| 12419 | CYC1     | 6.867560048 | Tumor_G2 |
| 12420 | ETFB     | 5.115508137 | Tumor_G2 |
| 12421 | UQCR10   | 7.532841632 | Tumor_G2 |
| 12422 | UQCRQ    | 7.335576852 | Tumor_G2 |
| 12423 | UQCC3    | 4.466238617 | Tumor_G2 |
| 12424 | COX15    | 4.890780612 | Tumor_G2 |
| 12425 | COX5A    | 7.067662172 | Tumor_G2 |
| 12426 | COX6B1   | 8.651913942 | Tumor_G2 |
| 12427 | COX6C    | 6.358998876 | Tumor_G2 |
| 12428 | COX7A2   | 7.021053138 | Tumor_G2 |
| 12429 | COX7B    | 6.101921767 | Tumor_G2 |
| 12430 | COX8A    | 9.537287501 | Tumor_G2 |
| 12431 | SCO1     | 3.477282187 | Tumor_G2 |
| 12432 | SURF1    | 6.51701291  | Tumor_G2 |
| 12433 | ATP6V1E1 | 7.066216148 | Tumor_G2 |
| 12434 | DLAT     | 5.535490247 | Tumor_G2 |
| 12435 | PDC      | 0.122221262 | Tumor_G2 |
| 12436 | SUCLG2   | 6.27731484  | Tumor_G2 |
| 12437 | SLC25A5  | 8.424553001 | Tumor_G2 |
| 12438 | UCP2     | 9.143546118 | Tumor_G2 |

|       |          |             |          |
|-------|----------|-------------|----------|
| 12439 | SOD2     | 5.409181818 | Tumor_G2 |
| 12440 | NOX4     | 2.894818147 | Tumor_G2 |
| 12441 | DUOX1    | 7.113359432 | Tumor_G2 |
| 12442 | DUOXA1   | 7.153136242 | Tumor_G2 |
| 12443 | DUOX2    | 7.901775747 | Tumor_G2 |
| 12444 | DUOXA2   | 5.414347266 | Tumor_G2 |
| 12445 | NDUFA1   | 7.674260502 | Tumor_G2 |
| 12446 | NDUFA2   | 6.432335765 | Tumor_G2 |
| 12447 | NDUFA8   | 7.048305302 | Tumor_G2 |
| 12448 | NDUFB1   | 5.4651137   | Tumor_G2 |
| 12449 | NDUFB10  | 7.444959868 | Tumor_G2 |
| 12450 | NDUFB2   | 6.167025253 | Tumor_G2 |
| 12451 | NDUFB3   | 5.873109932 | Tumor_G2 |
| 12452 | NDUFB7   | 8.432151126 | Tumor_G2 |
| 12453 | CYC1     | 6.594308226 | Tumor_G2 |
| 12454 | ETFB     | 5.152412988 | Tumor_G2 |
| 12455 | UQCR10   | 7.424440988 | Tumor_G2 |
| 12456 | UQCRQ    | 6.92844992  | Tumor_G2 |
| 12457 | UQCC3    | 4.849733346 | Tumor_G2 |
| 12458 | COX15    | 5.279359974 | Tumor_G2 |
| 12459 | COX5A    | 6.60174507  | Tumor_G2 |
| 12460 | COX6B1   | 8.356142505 | Tumor_G2 |
| 12461 | COX6C    | 6.168934365 | Tumor_G2 |
| 12462 | COX7A2   | 6.468598611 | Tumor_G2 |
| 12463 | COX7B    | 5.907303429 | Tumor_G2 |
| 12464 | COX8A    | 9.48769547  | Tumor_G2 |
| 12465 | SCO1     | 3.483302956 | Tumor_G2 |
| 12466 | SURF1    | 6.521026005 | Tumor_G2 |
| 12467 | ATP6V1E1 | 6.688025785 | Tumor_G2 |
| 12468 | DLAT     | 5.463164726 | Tumor_G2 |
| 12469 | PDC      | 0.213417219 | Tumor_G2 |
| 12470 | SUCLG2   | 6.135332019 | Tumor_G2 |
| 12471 | SLC25A5  | 7.577755094 | Tumor_G2 |
| 12472 | UCP2     | 8.261190492 | Tumor_G2 |
| 12473 | SOD2     | 4.487256367 | Tumor_G2 |
| 12474 | NOX4     | 2.144121434 | Tumor_G2 |
| 12475 | DUOX1    | 7.741579048 | Tumor_G2 |
| 12476 | DUOXA1   | 7.738500631 | Tumor_G2 |
| 12477 | DUOX2    | 8.358878324 | Tumor_G2 |
| 12478 | DUOXA2   | 6.65417738  | Tumor_G2 |



|       |          |             |          |
|-------|----------|-------------|----------|
| 12479 | NDUFA1   | 8.067409818 | Tumor_G2 |
| 12480 | NDUFA2   | 6.383160619 | Tumor_G2 |
| 12481 | NDUFA8   | 6.758070163 | Tumor_G2 |
| 12482 | NDUFB1   | 5.35977612  | Tumor_G2 |
| 12483 | NDUFB10  | 7.600589389 | Tumor_G2 |
| 12484 | NDUFB2   | 6.072157066 | Tumor_G2 |
| 12485 | NDUFB3   | 6.189206898 | Tumor_G2 |
| 12486 | NDUFB7   | 8.627178475 | Tumor_G2 |
| 12487 | CYC1     | 6.612086297 | Tumor_G2 |
| 12488 | ETFB     | 4.961543263 | Tumor_G2 |
| 12489 | UQCR10   | 7.398532051 | Tumor_G2 |
| 12490 | UQCRQ    | 6.998998604 | Tumor_G2 |
| 12491 | UQCC3    | 4.090716644 | Tumor_G2 |
| 12492 | COX15    | 4.991064269 | Tumor_G2 |
| 12493 | COX5A    | 6.737713378 | Tumor_G2 |
| 12494 | COX6B1   | 8.478902329 | Tumor_G2 |
| 12495 | COX6C    | 6.13222277  | Tumor_G2 |
| 12496 | COX7A2   | 6.570194816 | Tumor_G2 |
| 12497 | COX7B    | 5.851086384 | Tumor_G2 |
| 12498 | COX8A    | 9.510245052 | Tumor_G2 |
| 12499 | SCO1     | 3.301950153 | Tumor_G2 |
| 12500 | SURF1    | 6.683738644 | Tumor_G2 |
| 12501 | ATP6V1E1 | 6.957854453 | Tumor_G2 |
| 12502 | DLAT     | 4.914508759 | Tumor_G2 |
| 12503 | PDC      | 0.156903765 | Tumor_G2 |
| 12504 | SUCLG2   | 5.853156303 | Tumor_G2 |
| 12505 | SLC25A5  | 7.890143558 | Tumor_G2 |
| 12506 | UCP2     | 8.967070407 | Tumor_G2 |
| 12507 | SOD2     | 5.56818788  | Tumor_G2 |
| 12508 | NOX4     | 2.771795569 | Tumor_G2 |
| 12509 | DUOX1    | 6.789748653 | Tumor_G2 |
| 12510 | DUOXA1   | 6.785458208 | Tumor_G2 |
| 12511 | DUOX2    | 7.074571476 | Tumor_G2 |
| 12512 | DUOXA2   | 4.256305391 | Tumor_G2 |
| 12513 | NDUFA1   | 7.735549796 | Tumor_G2 |
| 12514 | NDUFA2   | 6.557632713 | Tumor_G2 |
| 12515 | NDUFA8   | 7.169133062 | Tumor_G2 |
| 12516 | NDUFB1   | 5.76529449  | Tumor_G2 |
| 12517 | NDUFB10  | 7.24197086  | Tumor_G2 |
| 12518 | NDUFB2   | 6.483313707 | Tumor_G2 |

|       |          |             |          |
|-------|----------|-------------|----------|
| 12519 | NDUFB3   | 6.271742838 | Tumor_G2 |
| 12520 | NDUFB7   | 8.657841351 | Tumor_G2 |
| 12521 | CYC1     | 6.982237327 | Tumor_G2 |
| 12522 | ETFB     | 4.976922459 | Tumor_G2 |
| 12523 | UQCR10   | 7.48365985  | Tumor_G2 |
| 12524 | UQCRQ    | 7.042992882 | Tumor_G2 |
| 12525 | UQCC3    | 4.456764043 | Tumor_G2 |
| 12526 | COX15    | 4.74708924  | Tumor_G2 |
| 12527 | COX5A    | 6.749270414 | Tumor_G2 |
| 12528 | COX6B1   | 8.510116565 | Tumor_G2 |
| 12529 | COX6C    | 6.483466996 | Tumor_G2 |
| 12530 | COX7A2   | 6.638269418 | Tumor_G2 |
| 12531 | COX7B    | 6.061868121 | Tumor_G2 |
| 12532 | COX8A    | 9.483681048 | Tumor_G2 |
| 12533 | SCO1     | 3.675635377 | Tumor_G2 |
| 12534 | SURF1    | 6.766258538 | Tumor_G2 |
| 12535 | ATP6V1E1 | 6.575312243 | Tumor_G2 |
| 12536 | DLAT     | 5.135072881 | Tumor_G2 |
| 12537 | PDC      | 0.135900759 | Tumor_G2 |
| 12538 | SUCLG2   | 6.461873831 | Tumor_G2 |
| 12539 | SLC25A5  | 8.424810662 | Tumor_G2 |
| 12540 | UCP2     | 6.532119946 | Tumor_G2 |
| 12541 | SOD2     | 5.370724212 | Tumor_G2 |
| 12542 | NOX4     | 1.52445785  | Tumor_G2 |
| 12543 | DUOX1    | 7.486071835 | Tumor_G2 |
| 12544 | DUOXA1   | 7.299105472 | Tumor_G2 |
| 12545 | DUOX2    | 8.052580412 | Tumor_G2 |
| 12546 | DUOXA2   | 5.266560001 | Tumor_G2 |
| 12547 | NDUFA1   | 7.641228505 | Tumor_G2 |
| 12548 | NDUFA2   | 6.587807576 | Tumor_G2 |
| 12549 | NDUFA8   | 7.056925216 | Tumor_G2 |
| 12550 | NDUFB1   | 5.352921718 | Tumor_G2 |
| 12551 | NDUFB10  | 7.343456145 | Tumor_G2 |
| 12552 | NDUFB2   | 6.630972434 | Tumor_G2 |
| 12553 | NDUFB3   | 6.208658724 | Tumor_G2 |
| 12554 | NDUFB7   | 8.401399925 | Tumor_G2 |
| 12555 | CYC1     | 6.865539275 | Tumor_G2 |
| 12556 | ETFB     | 5.185189372 | Tumor_G2 |
| 12557 | UQCR10   | 7.543513814 | Tumor_G2 |
| 12558 | UQCRQ    | 7.15526684  | Tumor_G2 |

|       |          |             |          |
|-------|----------|-------------|----------|
| 12559 | UQCC3    | 4.545922821 | Tumor_G2 |
| 12560 | COX15    | 5.169339656 | Tumor_G2 |
| 12561 | COX5A    | 7.001573275 | Tumor_G2 |
| 12562 | COX6B1   | 8.488649988 | Tumor_G2 |
| 12563 | COX6C    | 6.389314422 | Tumor_G2 |
| 12564 | COX7A2   | 6.676570206 | Tumor_G2 |
| 12565 | COX7B    | 6.104867087 | Tumor_G2 |
| 12566 | COX8A    | 9.382375578 | Tumor_G2 |
| 12567 | SCO1     | 3.656823839 | Tumor_G2 |
| 12568 | SURF1    | 6.600854666 | Tumor_G2 |
| 12569 | ATP6V1E1 | 6.938294791 | Tumor_G2 |
| 12570 | DLAT     | 5.708166824 | Tumor_G2 |
| 12571 | PDC      | 0.09946732  | Tumor_G2 |
| 12572 | SUCLG2   | 6.230323499 | Tumor_G2 |
| 12573 | SLC25A5  | 8.255036075 | Tumor_G2 |
| 12574 | UCP2     | 8.985877459 | Tumor_G2 |
| 12575 | SOD2     | 4.808059956 | Tumor_G2 |
| 12576 | NOX4     | 1.47888156  | Tumor_G2 |
| 12577 | DUOX1    | 6.361668391 | Tumor_G2 |
| 12578 | DUOXA1   | 6.376159    | Tumor_G2 |
| 12579 | DUOX2    | 6.781059878 | Tumor_G2 |
| 12580 | DUOXA2   | 5.434596192 | Tumor_G2 |
| 12581 | NDUFA1   | 8.12943319  | Tumor_G2 |
| 12582 | NDUFA2   | 7.322654259 | Tumor_G2 |
| 12583 | NDUFA8   | 7.515187695 | Tumor_G2 |
| 12584 | NDUFB1   | 5.891170475 | Tumor_G2 |
| 12585 | NDUFB10  | 8.067876366 | Tumor_G2 |
| 12586 | NDUFB2   | 7.576011126 | Tumor_G2 |
| 12587 | NDUFB3   | 6.409637188 | Tumor_G2 |
| 12588 | NDUFB7   | 9.377058825 | Tumor_G2 |
| 12589 | CYC1     | 7.731961752 | Tumor_G2 |
| 12590 | ETFB     | 5.688726237 | Tumor_G2 |
| 12591 | UQCR10   | 7.231152166 | Tumor_G2 |
| 12592 | UQCRQ    | 7.450414435 | Tumor_G2 |
| 12593 | UQCC3    | 4.462828523 | Tumor_G2 |
| 12594 | COX15    | 5.605440252 | Tumor_G2 |
| 12595 | COX5A    | 7.167862316 | Tumor_G2 |
| 12596 | COX6B1   | 8.98855326  | Tumor_G2 |
| 12597 | COX6C    | 6.868125708 | Tumor_G2 |
| 12598 | COX7A2   | 7.418514546 | Tumor_G2 |

|       |          |             |          |
|-------|----------|-------------|----------|
| 12599 | COX7B    | 6.673428174 | Tumor_G2 |
| 12600 | COX8A    | 10.13971202 | Tumor_G2 |
| 12601 | SCO1     | 4.447874509 | Tumor_G2 |
| 12602 | SURF1    | 7.647258    | Tumor_G2 |
| 12603 | ATP6V1E1 | 6.998051366 | Tumor_G2 |
| 12604 | DLAT     | 5.806235195 | Tumor_G2 |
| 12605 | PDC      | 0.13136068  | Tumor_G2 |
| 12606 | SUCLG2   | 6.990676314 | Tumor_G2 |
| 12607 | SLC25A5  | 8.47854868  | Tumor_G2 |
| 12608 | UCP2     | 7.719182795 | Tumor_G2 |
| 12609 | SOD2     | 4.84078048  | Tumor_G2 |
| 12610 | NOX4     | 1.361991279 | Tumor_G2 |
| 12611 | DUOX1    | 7.236650071 | Tumor_G2 |
| 12612 | DUOXA1   | 6.965058636 | Tumor_G2 |
| 12613 | DUOX2    | 7.683091863 | Tumor_G2 |
| 12614 | DUOXA2   | 6.671421368 | Tumor_G2 |
| 12615 | NDUFA1   | 8.357083848 | Tumor_G2 |
| 12616 | NDUFA2   | 7.272816324 | Tumor_G2 |
| 12617 | NDUFA8   | 7.278739662 | Tumor_G2 |
| 12618 | NDUFB1   | 6.388338378 | Tumor_G2 |
| 12619 | NDUFB10  | 7.84851775  | Tumor_G2 |
| 12620 | NDUFB2   | 6.702345838 | Tumor_G2 |
| 12621 | NDUFB3   | 6.538256678 | Tumor_G2 |
| 12622 | NDUFB7   | 9.015536536 | Tumor_G2 |
| 12623 | CYC1     | 6.898220228 | Tumor_G2 |
| 12624 | ETFB     | 5.310798167 | Tumor_G2 |
| 12625 | UQCR10   | 8.051414942 | Tumor_G2 |
| 12626 | UQCRQ    | 7.971672992 | Tumor_G2 |
| 12627 | UQCC3    | 4.942370986 | Tumor_G2 |
| 12628 | COX15    | 4.579098419 | Tumor_G2 |
| 12629 | COX5A    | 7.289714041 | Tumor_G2 |
| 12630 | COX6B1   | 9.068225474 | Tumor_G2 |
| 12631 | COX6C    | 6.803288169 | Tumor_G2 |
| 12632 | COX7A2   | 7.061493666 | Tumor_G2 |
| 12633 | COX7B    | 6.580992117 | Tumor_G2 |
| 12634 | COX8A    | 9.637865822 | Tumor_G2 |
| 12635 | SCO1     | 3.160361262 | Tumor_G2 |
| 12636 | SURF1    | 6.22212324  | Tumor_G2 |
| 12637 | ATP6V1E1 | 6.670472369 | Tumor_G2 |
| 12638 | DLAT     | 5.08049559  | Tumor_G2 |

|       |          |             |          |
|-------|----------|-------------|----------|
| 12639 | PDC      | 0           | Tumor_G2 |
| 12640 | SUCLG2   | 5.467136085 | Tumor_G2 |
| 12641 | SLC25A5  | 8.280297548 | Tumor_G2 |
| 12642 | UCP2     | 8.205319135 | Tumor_G2 |
| 12643 | SOD2     | 5.101611004 | Tumor_G2 |
| 12644 | NOX4     | 2.14588454  | Tumor_G2 |
| 12645 | DUOX1    | 6.875594368 | Tumor_G2 |
| 12646 | DUOXA1   | 6.947427443 | Tumor_G2 |
| 12647 | DUOX2    | 6.704223087 | Tumor_G2 |
| 12648 | DUOXA2   | 4.776351781 | Tumor_G2 |
| 12649 | NDUFA1   | 8.12382237  | Tumor_G2 |
| 12650 | NDUFA2   | 6.912053008 | Tumor_G2 |
| 12651 | NDUFA8   | 7.297626232 | Tumor_G2 |
| 12652 | NDUFB1   | 6.023002628 | Tumor_G2 |
| 12653 | NDUFB10  | 7.642915869 | Tumor_G2 |
| 12654 | NDUFB2   | 6.566504466 | Tumor_G2 |
| 12655 | NDUFB3   | 6.410616061 | Tumor_G2 |
| 12656 | NDUFB7   | 8.68935771  | Tumor_G2 |
| 12657 | CYC1     | 6.885032868 | Tumor_G2 |
| 12658 | ETFB     | 5.151016443 | Tumor_G2 |
| 12659 | UQCR10   | 7.413648641 | Tumor_G2 |
| 12660 | UQCRQ    | 7.461952675 | Tumor_G2 |
| 12661 | UQCC3    | 4.509516964 | Tumor_G2 |
| 12662 | COX15    | 4.717121622 | Tumor_G2 |
| 12663 | COX5A    | 6.999889129 | Tumor_G2 |
| 12664 | COX6B1   | 8.829581096 | Tumor_G2 |
| 12665 | COX6C    | 6.562858902 | Tumor_G2 |
| 12666 | COX7A2   | 6.916234575 | Tumor_G2 |
| 12667 | COX7B    | 6.222989598 | Tumor_G2 |
| 12668 | COX8A    | 9.392828853 | Tumor_G2 |
| 12669 | SCO1     | 3.231965798 | Tumor_G2 |
| 12670 | SURF1    | 6.085157312 | Tumor_G2 |
| 12671 | ATP6V1E1 | 6.549795092 | Tumor_G2 |
| 12672 | DLAT     | 4.775982299 | Tumor_G2 |
| 12673 | PDC      | 0.059706994 | Tumor_G2 |
| 12674 | SUCLG2   | 5.903687854 | Tumor_G2 |
| 12675 | SLC25A5  | 7.852041995 | Tumor_G2 |
| 12676 | UCP2     | 8.938022159 | Tumor_G2 |
| 12677 | SOD2     | 4.326753995 | Tumor_G2 |
| 12678 | NOX4     | 2.64244219  | Tumor_G2 |

|       |          |             |          |
|-------|----------|-------------|----------|
| 12679 | DUOX1    | 6.748143587 | Tumor_G2 |
| 12680 | DUOXA1   | 6.961890703 | Tumor_G2 |
| 12681 | DUOX2    | 7.388225782 | Tumor_G2 |
| 12682 | DUOXA2   | 5.290016121 | Tumor_G2 |
| 12683 | NDUFA1   | 8.094862185 | Tumor_G2 |
| 12684 | NDUFA2   | 6.955840624 | Tumor_G2 |
| 12685 | NDUFA8   | 7.352849351 | Tumor_G2 |
| 12686 | NDUFB1   | 6.051665311 | Tumor_G2 |
| 12687 | NDUFB10  | 7.699946262 | Tumor_G2 |
| 12688 | NDUFB2   | 7.065198283 | Tumor_G2 |
| 12689 | NDUFB3   | 6.62575948  | Tumor_G2 |
| 12690 | NDUFB7   | 8.991455053 | Tumor_G2 |
| 12691 | CYC1     | 7.235082816 | Tumor_G2 |
| 12692 | ETFB     | 5.358015359 | Tumor_G2 |
| 12693 | UQCR10   | 7.924680964 | Tumor_G2 |
| 12694 | UQCRQ    | 7.545478035 | Tumor_G2 |
| 12695 | UQCC3    | 4.801171777 | Tumor_G2 |
| 12696 | COX15    | 4.968705416 | Tumor_G2 |
| 12697 | COX5A    | 7.105697193 | Tumor_G2 |
| 12698 | COX6B1   | 8.716810084 | Tumor_G2 |
| 12699 | COX6C    | 6.75823094  | Tumor_G2 |
| 12700 | COX7A2   | 7.130293069 | Tumor_G2 |
| 12701 | COX7B    | 6.3081978   | Tumor_G2 |
| 12702 | COX8A    | 10.05199455 | Tumor_G2 |
| 12703 | SCO1     | 3.828386236 | Tumor_G2 |
| 12704 | SURF1    | 6.83851569  | Tumor_G2 |
| 12705 | ATP6V1E1 | 6.841024374 | Tumor_G2 |
| 12706 | DLAT     | 5.313897532 | Tumor_G2 |
| 12707 | PDC      | 0.094003642 | Tumor_G2 |
| 12708 | SUCLG2   | 6.509513305 | Tumor_G2 |
| 12709 | SLC25A5  | 8.427521159 | Tumor_G2 |
| 12710 | UCP2     | 5.540264503 | Tumor_G2 |
| 12711 | SOD2     | 4.592072796 | Tumor_G2 |
| 12712 | NOX4     | 0.90499376  | Tumor_G2 |
| 12713 | DUOX1    | 7.701252151 | Tumor_G2 |
| 12714 | DUOXA1   | 7.251953303 | Tumor_G2 |
| 12715 | DUOX2    | 8.813622848 | Tumor_G2 |
| 12716 | DUOXA2   | 6.917565147 | Tumor_G2 |
| 12717 | NDUFA1   | 7.743076219 | Tumor_G2 |
| 12718 | NDUFA2   | 6.857531885 | Tumor_G2 |

|       |          |              |          |
|-------|----------|--------------|----------|
| 12719 | NDUFA8   | 5.729679624  | Tumor_G2 |
| 12720 | NDUFB1   | 5.45753949   | Tumor_G2 |
| 12721 | NDUFB10  | 7.689873033  | Tumor_G2 |
| 12722 | NDUFB2   | 6.396275705  | Tumor_G2 |
| 12723 | NDUFB3   | 6.359917366  | Tumor_G2 |
| 12724 | NDUFB7   | 8.677008421  | Tumor_G2 |
| 12725 | CYC1     | 7.321570029  | Tumor_G2 |
| 12726 | ETFB     | 4.6171107337 | Tumor_G2 |
| 12727 | UQCR10   | 7.567357984  | Tumor_G2 |
| 12728 | UQCRQ    | 7.224831007  | Tumor_G2 |
| 12729 | UQCC3    | 4.069434691  | Tumor_G2 |
| 12730 | COX15    | 5.13024408   | Tumor_G2 |
| 12731 | COX5A    | 7.352583573  | Tumor_G2 |
| 12732 | COX6B1   | 8.609821456  | Tumor_G2 |
| 12733 | COX6C    | 6.315083959  | Tumor_G2 |
| 12734 | COX7A2   | 6.870930039  | Tumor_G2 |
| 12735 | COX7B    | 5.839925765  | Tumor_G2 |
| 12736 | COX8A    | 9.778038201  | Tumor_G2 |
| 12737 | SCO1     | 3.12306887   | Tumor_G2 |
| 12738 | SURF1    | 5.213120897  | Tumor_G2 |
| 12739 | ATP6V1E1 | 7.370085617  | Tumor_G2 |
| 12740 | DLAT     | 5.516495359  | Tumor_G2 |
| 12741 | PDC      | 0.118605943  | Tumor_G2 |
| 12742 | SUCLG2   | 7.197812596  | Tumor_G2 |
| 12743 | SLC25A5  | 8.283522902  | Tumor_G2 |
| 12744 | UCP2     | 8.045465551  | Tumor_G2 |
| 12745 | SOD2     | 4.729390537  | Tumor_G2 |
| 12746 | NOX4     | 0.674458033  | Tumor_G2 |
| 12747 | DUOX1    | 7.127990829  | Tumor_G2 |
| 12748 | DUOXA1   | 6.505246631  | Tumor_G2 |
| 12749 | DUOX2    | 6.899939536  | Tumor_G2 |
| 12750 | DUOXA2   | 4.103258154  | Tumor_G2 |
| 12751 | NDUFA1   | 8.293779224  | Tumor_G2 |
| 12752 | NDUFA2   | 6.93531568   | Tumor_G2 |
| 12753 | NDUFA8   | 7.254926215  | Tumor_G2 |
| 12754 | NDUFB1   | 5.737417295  | Tumor_G2 |
| 12755 | NDUFB10  | 7.835103372  | Tumor_G2 |
| 12756 | NDUFB2   | 6.93495718   | Tumor_G2 |
| 12757 | NDUFB3   | 6.381373185  | Tumor_G2 |
| 12758 | NDUFB7   | 8.948573251  | Tumor_G2 |

|       |          |             |          |
|-------|----------|-------------|----------|
| 12759 | CYC1     | 7.01371497  | Tumor_G2 |
| 12760 | ETFB     | 5.274087332 | Tumor_G2 |
| 12761 | UQCR10   | 7.897579586 | Tumor_G2 |
| 12762 | UQCRQ    | 7.556915048 | Tumor_G2 |
| 12763 | UQCC3    | 4.565442978 | Tumor_G2 |
| 12764 | COX15    | 4.887189915 | Tumor_G2 |
| 12765 | COX5A    | 7.282920815 | Tumor_G2 |
| 12766 | COX6B1   | 8.88170368  | Tumor_G2 |
| 12767 | COX6C    | 6.482257556 | Tumor_G2 |
| 12768 | COX7A2   | 6.993864994 | Tumor_G2 |
| 12769 | COX7B    | 6.084863242 | Tumor_G2 |
| 12770 | COX8A    | 9.7480625   | Tumor_G2 |
| 12771 | SCO1     | 3.208875484 | Tumor_G2 |
| 12772 | SURF1    | 6.330107881 | Tumor_G2 |
| 12773 | ATP6V1E1 | 7.045330251 | Tumor_G2 |
| 12774 | DLAT     | 4.81353287  | Tumor_G2 |
| 12775 | PDC      | 0.056655792 | Tumor_G2 |
| 12776 | SUCLG2   | 6.195492396 | Tumor_G2 |
| 12777 | SLC25A5  | 8.270023248 | Tumor_G2 |
| 12778 | UCP2     | 8.240157261 | Tumor_G2 |
| 12779 | SOD2     | 4.997573269 | Tumor_G2 |
| 12780 | NOX4     | 1.267598781 | Tumor_G2 |
| 12781 | DUOX1    | 6.255184639 | Tumor_G2 |
| 12782 | DUOXA1   | 6.397555841 | Tumor_G2 |
| 12783 | DUOX2    | 6.331035679 | Tumor_G2 |
| 12784 | DUOXA2   | 4.906828288 | Tumor_G2 |
| 12785 | NDUFA1   | 7.968238385 | Tumor_G2 |
| 12786 | NDUFA2   | 6.368749556 | Tumor_G2 |
| 12787 | NDUFA8   | 7.13218712  | Tumor_G2 |
| 12788 | NDUFB1   | 5.3700668   | Tumor_G2 |
| 12789 | NDUFB10  | 7.425980518 | Tumor_G2 |
| 12790 | NDUFB2   | 6.831254414 | Tumor_G2 |
| 12791 | NDUFB3   | 6.065487466 | Tumor_G2 |
| 12792 | NDUFB7   | 8.462044724 | Tumor_G2 |
| 12793 | CYC1     | 7.003054236 | Tumor_G2 |
| 12794 | ETFB     | 4.879451278 | Tumor_G2 |
| 12795 | UQCR10   | 7.301913321 | Tumor_G2 |
| 12796 | UQCRQ    | 7.047004919 | Tumor_G2 |
| 12797 | UQCC3    | 4.359237908 | Tumor_G2 |
| 12798 | COX15    | 5.203071521 | Tumor_G2 |



|       |          |             |          |
|-------|----------|-------------|----------|
| 12799 | COX5A    | 7.208093496 | Tumor_G2 |
| 12800 | COX6B1   | 8.491923016 | Tumor_G2 |
| 12801 | COX6C    | 6.225373261 | Tumor_G2 |
| 12802 | COX7A2   | 6.58259403  | Tumor_G2 |
| 12803 | COX7B    | 6.125156163 | Tumor_G2 |
| 12804 | COX8A    | 9.557646821 | Tumor_G2 |
| 12805 | SCO1     | 3.645954535 | Tumor_G2 |
| 12806 | SURF1    | 6.360162831 | Tumor_G2 |
| 12807 | ATP6V1E1 | 7.157352567 | Tumor_G2 |
| 12808 | DLAT     | 5.117641247 | Tumor_G2 |
| 12809 | PDC      | 0.271300184 | Tumor_G2 |
| 12810 | SUCLG2   | 6.56512431  | Tumor_G2 |
| 12811 | SLC25A5  | 8.350452929 | Tumor_G2 |
| 12812 | UCP2     | 6.915819525 | Tumor_G2 |
| 12813 | SOD2     | 4.977728873 | Tumor_G2 |
| 12814 | NOX4     | 1.130366131 | Tumor_G2 |
| 12815 | DUOX1    | 6.084738417 | Tumor_G2 |
| 12816 | DUOXA1   | 6.176899981 | Tumor_G2 |
| 12817 | DUOX2    | 6.55122053  | Tumor_G2 |
| 12818 | DUOXA2   | 4.300934776 | Tumor_G2 |
| 12819 | NDUFA1   | 7.843009569 | Tumor_G2 |
| 12820 | NDUFA2   | 6.490226374 | Tumor_G2 |
| 12821 | NDUFA8   | 7.009675276 | Tumor_G2 |
| 12822 | NDUFB1   | 5.467156707 | Tumor_G2 |
| 12823 | NDUFB10  | 7.47339296  | Tumor_G2 |
| 12824 | NDUFB2   | 6.623387017 | Tumor_G2 |
| 12825 | NDUFB3   | 6.143816229 | Tumor_G2 |
| 12826 | NDUFB7   | 8.491205698 | Tumor_G2 |
| 12827 | CYC1     | 7.018331336 | Tumor_G2 |
| 12828 | ETFB     | 5.190285354 | Tumor_G2 |
| 12829 | UQCR10   | 7.362396771 | Tumor_G2 |
| 12830 | UQCRQ    | 7.128998108 | Tumor_G2 |
| 12831 | UQCC3    | 4.207656018 | Tumor_G2 |
| 12832 | COX15    | 4.940706537 | Tumor_G2 |
| 12833 | COX5A    | 6.97361186  | Tumor_G2 |
| 12834 | COX6B1   | 8.631655998 | Tumor_G2 |
| 12835 | COX6C    | 6.20098389  | Tumor_G2 |
| 12836 | COX7A2   | 6.657165831 | Tumor_G2 |
| 12837 | COX7B    | 5.92527289  | Tumor_G2 |
| 12838 | COX8A    | 9.5694861   | Tumor_G2 |

|       |          |             |          |
|-------|----------|-------------|----------|
| 12839 | SCO1     | 3.279013566 | Tumor_G2 |
| 12840 | SURF1    | 6.087454151 | Tumor_G2 |
| 12841 | ATP6V1E1 | 7.069069515 | Tumor_G2 |
| 12842 | DLAT     | 5.113262814 | Tumor_G2 |
| 12843 | PDC      | 0.057191517 | Tumor_G2 |
| 12844 | SUCLG2   | 6.162973908 | Tumor_G2 |
| 12845 | SLC25A5  | 8.159474951 | Tumor_G2 |
| 12846 | UCP2     | 8.868090714 | Tumor_G2 |
| 12847 | SOD2     | 4.762773374 | Tumor_G2 |
| 12848 | NOX4     | 2.952655228 | Tumor_G2 |
| 12849 | DUOX1    | 6.683478841 | Tumor_G2 |
| 12850 | DUOXA1   | 6.608511013 | Tumor_G2 |
| 12851 | DUOX2    | 6.916102549 | Tumor_G2 |
| 12852 | DUOXA2   | 4.739666534 | Tumor_G2 |
| 12853 | NDUFA1   | 7.979619687 | Tumor_G2 |
| 12854 | NDUFA2   | 6.581529153 | Tumor_G2 |
| 12855 | NDUFA8   | 7.348928495 | Tumor_G2 |
| 12856 | NDUFB1   | 5.588767667 | Tumor_G2 |
| 12857 | NDUFB10  | 7.725390832 | Tumor_G2 |
| 12858 | NDUFB2   | 6.942624556 | Tumor_G2 |
| 12859 | NDUFB3   | 6.27644679  | Tumor_G2 |
| 12860 | NDUFB7   | 8.765626781 | Tumor_G2 |
| 12861 | CYC1     | 7.123407999 | Tumor_G2 |
| 12862 | ETFB     | 5.187110034 | Tumor_G2 |
| 12863 | UQCR10   | 7.613600752 | Tumor_G2 |
| 12864 | UQCRQ    | 7.349330776 | Tumor_G2 |
| 12865 | UQCC3    | 4.410143772 | Tumor_G2 |
| 12866 | COX15    | 4.879984345 | Tumor_G2 |
| 12867 | COX5A    | 7.470721651 | Tumor_G2 |
| 12868 | COX6B1   | 8.795726128 | Tumor_G2 |
| 12869 | COX6C    | 6.454297851 | Tumor_G2 |
| 12870 | COX7A2   | 6.956855024 | Tumor_G2 |
| 12871 | COX7B    | 6.188178046 | Tumor_G2 |
| 12872 | COX8A    | 9.747567371 | Tumor_G2 |
| 12873 | SCO1     | 2.963785752 | Tumor_G2 |
| 12874 | SURF1    | 6.624198306 | Tumor_G2 |
| 12875 | ATP6V1E1 | 7.291098303 | Tumor_G2 |
| 12876 | DLAT     | 5.133955935 | Tumor_G2 |
| 12877 | PDC      | 0           | Tumor_G2 |
| 12878 | SUCLG2   | 6.218728424 | Tumor_G2 |

|       |          |             |          |
|-------|----------|-------------|----------|
| 12879 | SLC25A5  | 8.487097996 | Tumor_G2 |
| 12880 | UCP2     | 9.584309137 | Tumor_G2 |
| 12881 | SOD2     | 4.343864101 | Tumor_G2 |
| 12882 | NOX4     | 1.772067657 | Tumor_G2 |
| 12883 | DUOX1    | 6.346267279 | Tumor_G2 |
| 12884 | DUOXA1   | 6.79523499  | Tumor_G2 |
| 12885 | DUOX2    | 6.701713141 | Tumor_G2 |
| 12886 | DUOXA2   | 4.368773482 | Tumor_G2 |
| 12887 | NDUFA1   | 8.754563952 | Tumor_G2 |
| 12888 | NDUFA2   | 7.37600341  | Tumor_G2 |
| 12889 | NDUFA8   | 7.475046148 | Tumor_G2 |
| 12890 | NDUFB1   | 6.821403107 | Tumor_G2 |
| 12891 | NDUFB10  | 8.05836747  | Tumor_G2 |
| 12892 | NDUFB2   | 6.404416156 | Tumor_G2 |
| 12893 | NDUFB3   | 6.053348528 | Tumor_G2 |
| 12894 | NDUFB7   | 9.546604424 | Tumor_G2 |
| 12895 | CYC1     | 6.631739474 | Tumor_G2 |
| 12896 | ETFB     | 5.204267243 | Tumor_G2 |
| 12897 | UQCR10   | 7.899304273 | Tumor_G2 |
| 12898 | UQCRQ    | 7.872332574 | Tumor_G2 |
| 12899 | UQCC3    | 4.805791124 | Tumor_G2 |
| 12900 | COX15    | 3.922060828 | Tumor_G2 |
| 12901 | COX5A    | 7.139001093 | Tumor_G2 |
| 12902 | COX6B1   | 9.49518865  | Tumor_G2 |
| 12903 | COX6C    | 7.184645785 | Tumor_G2 |
| 12904 | COX7A2   | 6.897012524 | Tumor_G2 |
| 12905 | COX7B    | 6.417725156 | Tumor_G2 |
| 12906 | COX8A    | 9.342703256 | Tumor_G2 |
| 12907 | SCO1     | 2.393748004 | Tumor_G2 |
| 12908 | SURF1    | 6.333997198 | Tumor_G2 |
| 12909 | ATP6V1E1 | 6.206984307 | Tumor_G2 |
| 12910 | DLAT     | 3.671433759 | Tumor_G2 |
| 12911 | PDC      | 0           | Tumor_G2 |
| 12912 | SUCLG2   | 5.109004786 | Tumor_G2 |
| 12913 | SLC25A5  | 6.739399019 | Tumor_G2 |
| 12914 | UCP2     | 7.330554569 | Tumor_G2 |
| 12915 | SOD2     | 3.747131391 | Tumor_G2 |
| 12916 | NOX4     | 2.094201031 | Tumor_G2 |
| 12917 | DUOX1    | 7.693770917 | Tumor_G2 |
| 12918 | DUOXA1   | 7.684793616 | Tumor_G2 |

|       |          |             |          |
|-------|----------|-------------|----------|
| 12919 | DUOX2    | 8.077667017 | Tumor_G2 |
| 12920 | DUOXA2   | 6.648107895 | Tumor_G2 |
| 12921 | NDUFA1   | 8.48464552  | Tumor_G2 |
| 12922 | NDUFA2   | 7.128305574 | Tumor_G2 |
| 12923 | NDUFA8   | 7.143838751 | Tumor_G2 |
| 12924 | NDUFB1   | 6.334444026 | Tumor_G2 |
| 12925 | NDUFB10  | 7.678880422 | Tumor_G2 |
| 12926 | NDUFB2   | 6.397402385 | Tumor_G2 |
| 12927 | NDUFB3   | 5.724504858 | Tumor_G2 |
| 12928 | NDUFB7   | 9.048773876 | Tumor_G2 |
| 12929 | CYC1     | 6.16877458  | Tumor_G2 |
| 12930 | ETFB     | 4.803023804 | Tumor_G2 |
| 12931 | UQCR10   | 7.805214397 | Tumor_G2 |
| 12932 | UQCRQ    | 7.522785925 | Tumor_G2 |
| 12933 | UQCC3    | 4.168015348 | Tumor_G2 |
| 12934 | COX15    | 3.645342915 | Tumor_G2 |
| 12935 | COX5A    | 6.810538489 | Tumor_G2 |
| 12936 | COX6B1   | 9.289818331 | Tumor_G2 |
| 12937 | COX6C    | 6.90449543  | Tumor_G2 |
| 12938 | COX7A2   | 6.684826939 | Tumor_G2 |
| 12939 | COX7B    | 6.170623111 | Tumor_G2 |
| 12940 | COX8A    | 9.031261403 | Tumor_G2 |
| 12941 | SCO1     | 1.997154321 | Tumor_G2 |
| 12942 | SURF1    | 6.056513571 | Tumor_G2 |
| 12943 | ATP6V1E1 | 6.299636651 | Tumor_G2 |
| 12944 | DLAT     | 3.747477912 | Tumor_G2 |
| 12945 | PDC      | 0           | Tumor_G2 |
| 12946 | SUCLG2   | 5.002834246 | Tumor_G2 |
| 12947 | SLC25A5  | 6.429160017 | Tumor_G2 |
| 12948 | UCP2     | 8.473833188 | Tumor_G2 |
| 12949 | SOD2     | 3.692026998 | Tumor_G2 |
| 12950 | NOX4     | 1.569968105 | Tumor_G2 |
| 12951 | DUOX1    | 5.585592699 | Tumor_G2 |
| 12952 | DUOXA1   | 6.043363884 | Tumor_G2 |
| 12953 | DUOX2    | 6.278765264 | Tumor_G2 |
| 12954 | DUOXA2   | 4.761788258 | Tumor_G2 |
| 12955 | NDUFA1   | 8.493188601 | Tumor_G2 |
| 12956 | NDUFA2   | 7.048358983 | Tumor_G2 |
| 12957 | NDUFA8   | 7.405636701 | Tumor_G2 |
| 12958 | NDUFB1   | 6.242771148 | Tumor_G2 |

|       |          |             |          |
|-------|----------|-------------|----------|
| 12959 | NDUFB10  | 7.813394015 | Tumor_G2 |
| 12960 | NDUFB2   | 6.938328137 | Tumor_G2 |
| 12961 | NDUFB3   | 6.733073864 | Tumor_G2 |
| 12962 | NDUFB7   | 9.391592048 | Tumor_G2 |
| 12963 | CYC1     | 7.313540019 | Tumor_G2 |
| 12964 | ETFB     | 5.67632004  | Tumor_G2 |
| 12965 | UQCR10   | 8.06412718  | Tumor_G2 |
| 12966 | UQCRQ    | 7.687327924 | Tumor_G2 |
| 12967 | UQCC3    | 4.992533656 | Tumor_G2 |
| 12968 | COX15    | 4.789952327 | Tumor_G2 |
| 12969 | COX5A    | 7.066521362 | Tumor_G2 |
| 12970 | COX6B1   | 9.015543807 | Tumor_G2 |
| 12971 | COX6C    | 6.838978497 | Tumor_G2 |
| 12972 | COX7A2   | 7.126142071 | Tumor_G2 |
| 12973 | COX7B    | 6.277709648 | Tumor_G2 |
| 12974 | COX8A    | 9.758293519 | Tumor_G2 |
| 12975 | SCO1     | 3.239422823 | Tumor_G2 |
| 12976 | SURF1    | 6.89634229  | Tumor_G2 |
| 12977 | ATP6V1E1 | 7.11669024  | Tumor_G2 |
| 12978 | DLAT     | 4.638830182 | Tumor_G2 |
| 12979 | PDC      | 0           | Tumor_G2 |
| 12980 | SUCLG2   | 5.932201794 | Tumor_G2 |
| 12981 | SLC25A5  | 8.011966648 | Tumor_G2 |
| 12982 | UCP2     | 8.397104578 | Tumor_G2 |
| 12983 | SOD2     | 4.054284694 | Tumor_G2 |
| 12984 | NOX4     | 2.093349431 | Tumor_G2 |
| 12985 | DUOX1    | 7.70678185  | Tumor_G2 |
| 12986 | DUOXA1   | 7.469982337 | Tumor_G2 |
| 12987 | DUOX2    | 8.375002919 | Tumor_G2 |
| 12988 | DUOXA2   | 6.151405001 | Tumor_G2 |
| 12989 | NDUFA1   | 8.004651848 | Tumor_G2 |
| 12990 | NDUFA2   | 6.553030391 | Tumor_G2 |
| 12991 | NDUFA8   | 6.932956174 | Tumor_G2 |
| 12992 | NDUFB1   | 5.632526763 | Tumor_G2 |
| 12993 | NDUFB10  | 7.449268641 | Tumor_G2 |
| 12994 | NDUFB2   | 6.50689203  | Tumor_G2 |
| 12995 | NDUFB3   | 6.392028043 | Tumor_G2 |
| 12996 | NDUFB7   | 8.75327964  | Tumor_G2 |
| 12997 | CYC1     | 6.929726094 | Tumor_G2 |
| 12998 | ETFB     | 5.093993453 | Tumor_G2 |

|       |          |             |          |
|-------|----------|-------------|----------|
| 12999 | UQCR10   | 7.705018724 | Tumor_G2 |
| 13000 | UQCRQ    | 7.246456436 | Tumor_G2 |
| 13001 | UQCC3    | 4.750277362 | Tumor_G2 |
| 13002 | COX15    | 4.562290492 | Tumor_G2 |
| 13003 | COX5A    | 6.965263075 | Tumor_G2 |
| 13004 | COX6B1   | 8.555548559 | Tumor_G2 |
| 13005 | COX6C    | 6.363546563 | Tumor_G2 |
| 13006 | COX7A2   | 6.835829363 | Tumor_G2 |
| 13007 | COX7B    | 6.00240879  | Tumor_G2 |
| 13008 | COX8A    | 9.569238847 | Tumor_G2 |
| 13009 | SCO1     | 3.524181507 | Tumor_G2 |
| 13010 | SURF1    | 6.429048951 | Tumor_G2 |
| 13011 | ATP6V1E1 | 7.066893501 | Tumor_G2 |
| 13012 | DLAT     | 5.010728626 | Tumor_G2 |
| 13013 | PDC      | 0.219978678 | Tumor_G2 |
| 13014 | SUCLG2   | 6.034364035 | Tumor_G2 |
| 13015 | SLC25A5  | 7.750245773 | Tumor_G2 |
| 13016 | UCP2     | 9.727650664 | Tumor_G2 |
| 13017 | SOD2     | 4.709945328 | Tumor_G2 |
| 13018 | NOX4     | 2.940217277 | Tumor_G2 |
| 13019 | DUOX1    | 7.992541494 | Tumor_G2 |
| 13020 | DUOXA1   | 7.936362805 | Tumor_G2 |
| 13021 | DUOX2    | 8.647903028 | Tumor_G2 |
| 13022 | DUOXA2   | 5.9749015   | Tumor_G2 |
| 13023 | NDUFA1   | 8.194301732 | Tumor_G2 |
| 13024 | NDUFA2   | 6.789029518 | Tumor_G2 |
| 13025 | NDUFA8   | 7.283471518 | Tumor_G2 |
| 13026 | NDUFB1   | 5.719187534 | Tumor_G2 |
| 13027 | NDUFB10  | 7.322585296 | Tumor_G2 |
| 13028 | NDUFB2   | 6.890392248 | Tumor_G2 |
| 13029 | NDUFB3   | 6.603994313 | Tumor_G2 |
| 13030 | NDUFB7   | 8.58649849  | Tumor_G2 |
| 13031 | CYC1     | 7.016496278 | Tumor_G2 |
| 13032 | ETFB     | 5.243647154 | Tumor_G2 |
| 13033 | UQCR10   | 7.731871943 | Tumor_G2 |
| 13034 | UQCRQ    | 7.43747166  | Tumor_G2 |
| 13035 | UQCC3    | 3.745482712 | Tumor_G2 |
| 13036 | COX15    | 4.861204157 | Tumor_G2 |
| 13037 | COX5A    | 7.195923093 | Tumor_G2 |
| 13038 | COX6B1   | 8.863161162 | Tumor_G2 |

|       |          |             |          |
|-------|----------|-------------|----------|
| 13039 | COX6C    | 6.651469968 | Tumor_G2 |
| 13040 | COX7A2   | 7.343750864 | Tumor_G2 |
| 13041 | COX7B    | 6.467770679 | Tumor_G2 |
| 13042 | COX8A    | 9.129708986 | Tumor_G2 |
| 13043 | SCO1     | 3.226752964 | Tumor_G2 |
| 13044 | SURF1    | 6.58559315  | Tumor_G2 |
| 13045 | ATP6V1E1 | 7.372100498 | Tumor_G2 |
| 13046 | DLAT     | 5.494897991 | Tumor_G2 |
| 13047 | PDC      | 0.048513094 | Tumor_G2 |
| 13048 | SUCLG2   | 6.462172986 | Tumor_G2 |
| 13049 | SLC25A5  | 8.676511788 | Tumor_G2 |
| 13050 | UCP2     | 9.010905926 | Tumor_G2 |
| 13051 | SOD2     | 5.488047935 | Tumor_G2 |
| 13052 | NOX4     | 3.307639985 | Tumor_G2 |
| 13053 | DUOX1    | 6.006686704 | Tumor_G2 |
| 13054 | DUOXA1   | 6.299230898 | Tumor_G2 |
| 13055 | DUOX2    | 5.89321893  | Tumor_G2 |
| 13056 | DUOXA2   | 3.314230514 | Tumor_G2 |
| 13057 | NDUFA1   | 8.660301382 | Tumor_G2 |
| 13058 | NDUFA2   | 7.419216298 | Tumor_G2 |
| 13059 | NDUFA8   | 6.809120271 | Tumor_G2 |
| 13060 | NDUFB1   | 6.412012829 | Tumor_G2 |
| 13061 | NDUFB10  | 7.632425632 | Tumor_G2 |
| 13062 | NDUFB2   | 7.069355646 | Tumor_G2 |
| 13063 | NDUFB3   | 6.747851214 | Tumor_G2 |
| 13064 | NDUFB7   | 9.481590735 | Tumor_G2 |
| 13065 | CYC1     | 7.012728716 | Tumor_G2 |
| 13066 | ETFB     | 5.356638628 | Tumor_G2 |
| 13067 | UQCR10   | 8.126842408 | Tumor_G2 |
| 13068 | UQCRQ    | 8.090454056 | Tumor_G2 |
| 13069 | UQCC3    | 4.612468507 | Tumor_G2 |
| 13070 | COX15    | 4.187255892 | Tumor_G2 |
| 13071 | COX5A    | 7.215599301 | Tumor_G2 |
| 13072 | COX6B1   | 9.137719718 | Tumor_G2 |
| 13073 | COX6C    | 7.070662269 | Tumor_G2 |
| 13074 | COX7A2   | 7.307602094 | Tumor_G2 |
| 13075 | COX7B    | 6.551770992 | Tumor_G2 |
| 13076 | COX8A    | 9.955731121 | Tumor_G2 |
| 13077 | SCO1     | 2.803312461 | Tumor_G2 |
| 13078 | SURF1    | 6.198281675 | Tumor_G2 |

|       |          |             |          |
|-------|----------|-------------|----------|
| 13079 | ATP6V1E1 | 7.207239429 | Tumor_G2 |
| 13080 | DLAT     | 4.584549661 | Tumor_G2 |
| 13081 | PDC      | 0.138926182 | Tumor_G2 |
| 13082 | SUCLG2   | 6.155336255 | Tumor_G2 |
| 13083 | SLC25A5  | 7.683230896 | Tumor_G2 |
| 13084 | UCP2     | 9.770431898 | Tumor_G2 |
| 13085 | SOD2     | 4.198329522 | Tumor_G2 |
| 13086 | NOX4     | 2.012387142 | Tumor_G2 |
| 13087 | DUOX1    | 6.518894633 | Tumor_G2 |
| 13088 | DUOXA1   | 6.292464659 | Tumor_G2 |
| 13089 | DUOX2    | 7.129052432 | Tumor_G2 |
| 13090 | DUOXA2   | 4.913994999 | Tumor_G2 |
| 13091 | NDUFA1   | 8.3496172   | Tumor_G2 |
| 13092 | NDUFA2   | 7.232231126 | Tumor_G2 |
| 13093 | NDUFA8   | 7.133437711 | Tumor_G2 |
| 13094 | NDUFB1   | 6.148137331 | Tumor_G2 |
| 13095 | NDUFB10  | 7.775651324 | Tumor_G2 |
| 13096 | NDUFB2   | 6.025786397 | Tumor_G2 |
| 13097 | NDUFB3   | 5.304498025 | Tumor_G2 |
| 13098 | NDUFB7   | 9.375857099 | Tumor_G2 |
| 13099 | CYC1     | 6.433029195 | Tumor_G2 |
| 13100 | ETFB     | 5.043437917 | Tumor_G2 |
| 13101 | UQCR10   | 7.65791983  | Tumor_G2 |
| 13102 | UQCRQ    | 7.266113312 | Tumor_G2 |
| 13103 | UQCC3    | 4.934751779 | Tumor_G2 |
| 13104 | COX15    | 4.106120132 | Tumor_G2 |
| 13105 | COX5A    | 6.363724581 | Tumor_G2 |
| 13106 | COX6B1   | 9.254289789 | Tumor_G2 |
| 13107 | COX6C    | 6.575565778 | Tumor_G2 |
| 13108 | COX7A2   | 6.251578589 | Tumor_G2 |
| 13109 | COX7B    | 5.872106901 | Tumor_G2 |
| 13110 | COX8A    | 8.974473615 | Tumor_G2 |
| 13111 | SCO1     | 2.073939562 | Tumor_G2 |
| 13112 | SURF1    | 6.3619841   | Tumor_G2 |
| 13113 | ATP6V1E1 | 6.074915768 | Tumor_G2 |
| 13114 | DLAT     | 3.760942324 | Tumor_G2 |
| 13115 | PDC      | 0.440624404 | Tumor_G2 |
| 13116 | SUCLG2   | 5.316527351 | Tumor_G2 |
| 13117 | SLC25A5  | 5.857194975 | Tumor_G2 |
| 13118 | UCP2     | 7.562371473 | Tumor_G2 |



|       |          |             |          |
|-------|----------|-------------|----------|
| 13119 | SOD2     | 3.395441767 | Tumor_G2 |
| 13120 | NOX4     | 2.216701262 | Tumor_G2 |
| 13121 | DUOX1    | 7.21213474  | Tumor_G2 |
| 13122 | DUOXA1   | 7.235337067 | Tumor_G2 |
| 13123 | DUOX2    | 7.557219979 | Tumor_G2 |
| 13124 | DUOXA2   | 6.471423586 | Tumor_G2 |
| 13125 | NDUFA1   | 8.193895045 | Tumor_G2 |
| 13126 | NDUFA2   | 6.700112604 | Tumor_G2 |
| 13127 | NDUFA8   | 7.02069994  | Tumor_G2 |
| 13128 | NDUFB1   | 5.617325142 | Tumor_G2 |
| 13129 | NDUFB10  | 7.805571436 | Tumor_G2 |
| 13130 | NDUFB2   | 6.473023232 | Tumor_G2 |
| 13131 | NDUFB3   | 6.241460885 | Tumor_G2 |
| 13132 | NDUFB7   | 8.97980514  | Tumor_G2 |
| 13133 | CYC1     | 6.828149651 | Tumor_G2 |
| 13134 | ETFB     | 5.048753673 | Tumor_G2 |
| 13135 | UQCR10   | 7.511190451 | Tumor_G2 |
| 13136 | UQCRQ    | 7.207021391 | Tumor_G2 |
| 13137 | UQCC3    | 4.199790044 | Tumor_G2 |
| 13138 | COX15    | 4.68105597  | Tumor_G2 |
| 13139 | COX5A    | 7.286456367 | Tumor_G2 |
| 13140 | COX6B1   | 8.760894839 | Tumor_G2 |
| 13141 | COX6C    | 6.429175307 | Tumor_G2 |
| 13142 | COX7A2   | 6.80287401  | Tumor_G2 |
| 13143 | COX7B    | 6.1025777   | Tumor_G2 |
| 13144 | COX8A    | 9.608330599 | Tumor_G2 |
| 13145 | SCO1     | 3.241580415 | Tumor_G2 |
| 13146 | SURF1    | 6.096040964 | Tumor_G2 |
| 13147 | ATP6V1E1 | 6.69916042  | Tumor_G2 |
| 13148 | DLAT     | 4.670642212 | Tumor_G2 |
| 13149 | PDC      | 0.226762831 | Tumor_G2 |
| 13150 | SUCLG2   | 5.477846832 | Tumor_G2 |
| 13151 | SLC25A5  | 7.965931296 | Tumor_G2 |
| 13152 | UCP2     | 8.085318639 | Tumor_G2 |
| 13153 | SOD2     | 4.707165752 | Tumor_G2 |
| 13154 | NOX4     | 3.095211826 | Tumor_G2 |
| 13155 | DUOX1    | 6.457444077 | Tumor_G2 |
| 13156 | DUOXA1   | 6.378967467 | Tumor_G2 |
| 13157 | DUOX2    | 6.843785998 | Tumor_G2 |
| 13158 | DUOXA2   | 4.926844029 | Tumor_G2 |

|       |          |             |          |
|-------|----------|-------------|----------|
| 13159 | NDUFA1   | 8.43517745  | Tumor_G2 |
| 13160 | NDUFA2   | 7.36184391  | Tumor_G2 |
| 13161 | NDUFA8   | 7.156352807 | Tumor_G2 |
| 13162 | NDUFB1   | 5.726541816 | Tumor_G2 |
| 13163 | NDUFB10  | 7.401147255 | Tumor_G2 |
| 13164 | NDUFB2   | 7.186169314 | Tumor_G2 |
| 13165 | NDUFB3   | 5.605216713 | Tumor_G2 |
| 13166 | NDUFB7   | 9.062286969 | Tumor_G2 |
| 13167 | CYC1     | 7.283155251 | Tumor_G2 |
| 13168 | ETFB     | 5.258002624 | Tumor_G2 |
| 13169 | UQCR10   | 8.006674806 | Tumor_G2 |
| 13170 | UQCRQ    | 7.419104484 | Tumor_G2 |
| 13171 | UQCC3    | 4.269065273 | Tumor_G2 |
| 13172 | COX15    | 4.481473832 | Tumor_G2 |
| 13173 | COX5A    | 6.466846478 | Tumor_G2 |
| 13174 | COX6B1   | 8.540420253 | Tumor_G2 |
| 13175 | COX6C    | 6.944755088 | Tumor_G2 |
| 13176 | COX7A2   | 6.404541451 | Tumor_G2 |
| 13177 | COX7B    | 6.264783869 | Tumor_G2 |
| 13178 | COX8A    | 9.535892339 | Tumor_G2 |
| 13179 | SCO1     | 3.58889032  | Tumor_G2 |
| 13180 | SURF1    | 5.901524508 | Tumor_G2 |
| 13181 | ATP6V1E1 | 6.636826496 | Tumor_G2 |
| 13182 | DLAT     | 4.315709425 | Tumor_G2 |
| 13183 | PDC      | 0.03783654  | Tumor_G2 |
| 13184 | SUCLG2   | 5.751293982 | Tumor_G2 |
| 13185 | SLC25A5  | 9.049856073 | Tumor_G2 |
| 13186 | UCP2     | 5.554315771 | Tumor_G2 |
| 13187 | SOD2     | 4.001444908 | Tumor_G2 |
| 13188 | NOX4     | 0.657960037 | Tumor_G2 |
| 13189 | DUOX1    | 4.87115093  | Tumor_G2 |
| 13190 | DUOXA1   | 5.672470383 | Tumor_G2 |
| 13191 | DUOX2    | 5.693966617 | Tumor_G2 |
| 13192 | DUOXA2   | 5.234208476 | Tumor_G2 |
| 13193 | NDUFA1   | 8.332894296 | Tumor_G2 |
| 13194 | NDUFA2   | 7.159430851 | Tumor_G2 |
| 13195 | NDUFA8   | 7.353185312 | Tumor_G2 |
| 13196 | NDUFB1   | 6.024050559 | Tumor_G2 |
| 13197 | NDUFB10  | 7.476188505 | Tumor_G2 |
| 13198 | NDUFB2   | 6.774618573 | Tumor_G2 |

|       |          |             |          |
|-------|----------|-------------|----------|
| 13199 | NDUFB3   | 6.402569217 | Tumor_G2 |
| 13200 | NDUFB7   | 8.944273786 | Tumor_G2 |
| 13201 | CYC1     | 6.921484099 | Tumor_G2 |
| 13202 | ETFB     | 5.093326587 | Tumor_G2 |
| 13203 | UQCR10   | 7.697348382 | Tumor_G2 |
| 13204 | UQCRQ    | 7.544958433 | Tumor_G2 |
| 13205 | UQCC3    | 4.687013326 | Tumor_G2 |
| 13206 | COX15    | 4.811385169 | Tumor_G2 |
| 13207 | COX5A    | 7.090485027 | Tumor_G2 |
| 13208 | COX6B1   | 8.859581563 | Tumor_G2 |
| 13209 | COX6C    | 6.704802144 | Tumor_G2 |
| 13210 | COX7A2   | 7.246047244 | Tumor_G2 |
| 13211 | COX7B    | 6.296506245 | Tumor_G2 |
| 13212 | COX8A    | 9.009952429 | Tumor_G2 |
| 13213 | SCO1     | 3.457641022 | Tumor_G2 |
| 13214 | SURF1    | 6.529059068 | Tumor_G2 |
| 13215 | ATP6V1E1 | 7.068933936 | Tumor_G2 |
| 13216 | DLAT     | 5.197805246 | Tumor_G2 |
| 13217 | PDC      | 0.455830049 | Tumor_G2 |
| 13218 | SUCLG2   | 6.062961228 | Tumor_G2 |
| 13219 | SLC25A5  | 8.057388511 | Tumor_G2 |
| 13220 | UCP2     | 9.249923055 | Tumor_G2 |
| 13221 | SOD2     | 4.931151776 | Tumor_G2 |
| 13222 | NOX4     | 2.815498582 | Tumor_G2 |
| 13223 | DUOX1    | 6.189018788 | Tumor_G2 |
| 13224 | DUOXA1   | 6.639416806 | Tumor_G2 |
| 13225 | DUOX2    | 6.846521781 | Tumor_G2 |
| 13226 | DUOXA2   | 5.134809876 | Tumor_G2 |
| 13227 | NDUFA1   | 8.09939152  | Tumor_G2 |
| 13228 | NDUFA2   | 6.990489396 | Tumor_G2 |
| 13229 | NDUFA8   | 7.150841973 | Tumor_G2 |
| 13230 | NDUFB1   | 5.81156702  | Tumor_G2 |
| 13231 | NDUFB10  | 7.622804104 | Tumor_G2 |
| 13232 | NDUFB2   | 6.895869096 | Tumor_G2 |
| 13233 | NDUFB3   | 6.616161338 | Tumor_G2 |
| 13234 | NDUFB7   | 8.613391721 | Tumor_G2 |
| 13235 | CYC1     | 7.176307477 | Tumor_G2 |
| 13236 | ETFB     | 5.085500591 | Tumor_G2 |
| 13237 | UQCR10   | 7.756290767 | Tumor_G2 |
| 13238 | UQCRQ    | 7.297764025 | Tumor_G2 |

|       |          |             |          |
|-------|----------|-------------|----------|
| 13239 | UQCC3    | 4.407557806 | Tumor_G2 |
| 13240 | COX15    | 4.487701517 | Tumor_G2 |
| 13241 | COX5A    | 7.363772269 | Tumor_G2 |
| 13242 | COX6B1   | 8.500683051 | Tumor_G2 |
| 13243 | COX6C    | 6.694694488 | Tumor_G2 |
| 13244 | COX7A2   | 6.956176928 | Tumor_G2 |
| 13245 | COX7B    | 6.113253428 | Tumor_G2 |
| 13246 | COX8A    | 9.511496054 | Tumor_G2 |
| 13247 | SCO1     | 3.395443269 | Tumor_G2 |
| 13248 | SURF1    | 6.282158108 | Tumor_G2 |
| 13249 | ATP6V1E1 | 6.945769656 | Tumor_G2 |
| 13250 | DLAT     | 4.924568667 | Tumor_G2 |
| 13251 | PDC      | 0.089481793 | Tumor_G2 |
| 13252 | SUCLG2   | 6.435315318 | Tumor_G2 |
| 13253 | SLC25A5  | 8.389406602 | Tumor_G2 |
| 13254 | UCP2     | 7.873334682 | Tumor_G2 |
| 13255 | SOD2     | 5.133973728 | Tumor_G2 |
| 13256 | NOX4     | 1.356208794 | Tumor_G2 |
| 13257 | DUOX1    | 6.251609456 | Tumor_G2 |
| 13258 | DUOXA1   | 6.066425479 | Tumor_G2 |
| 13259 | DUOX2    | 6.921444048 | Tumor_G2 |
| 13260 | DUOXA2   | 4.671833493 | Tumor_G2 |
| 13261 | NDUFA1   | 8.228230863 | Tumor_G2 |
| 13262 | NDUFA2   | 6.718893833 | Tumor_G2 |
| 13263 | NDUFA8   | 7.264200317 | Tumor_G2 |
| 13264 | NDUFB1   | 5.679890446 | Tumor_G2 |
| 13265 | NDUFB10  | 7.64251934  | Tumor_G2 |
| 13266 | NDUFB2   | 6.733026658 | Tumor_G2 |
| 13267 | NDUFB3   | 6.478487358 | Tumor_G2 |
| 13268 | NDUFB7   | 8.734062872 | Tumor_G2 |
| 13269 | CYC1     | 6.935729746 | Tumor_G2 |
| 13270 | ETFB     | 5.425332983 | Tumor_G2 |
| 13271 | UQCR10   | 7.411102435 | Tumor_G2 |
| 13272 | UQCRQ    | 7.15362436  | Tumor_G2 |
| 13273 | UQCC3    | 4.420754585 | Tumor_G2 |
| 13274 | COX15    | 5.161778539 | Tumor_G2 |
| 13275 | COX5A    | 7.261181566 | Tumor_G2 |
| 13276 | COX6B1   | 8.71282047  | Tumor_G2 |
| 13277 | COX6C    | 6.477081431 | Tumor_G2 |
| 13278 | COX7A2   | 6.866504676 | Tumor_G2 |

|       |          |             |          |
|-------|----------|-------------|----------|
| 13279 | COX7B    | 6.096708828 | Tumor_G2 |
| 13280 | COX8A    | 9.612996992 | Tumor_G2 |
| 13281 | SCO1     | 3.661648069 | Tumor_G2 |
| 13282 | SURF1    | 6.61006601  | Tumor_G2 |
| 13283 | ATP6V1E1 | 6.496500579 | Tumor_G2 |
| 13284 | DLAT     | 5.139882253 | Tumor_G2 |
| 13285 | PDC      | 0.238296996 | Tumor_G2 |
| 13286 | SUCLG2   | 6.393284773 | Tumor_G2 |
| 13287 | SLC25A5  | 8.056395559 | Tumor_G2 |
| 13288 | UCP2     | 8.752597512 | Tumor_G2 |
| 13289 | SOD2     | 4.890344195 | Tumor_G2 |
| 13290 | NOX4     | 1.375042846 | Tumor_G2 |
| 13291 | DUOX1    | 6.922134239 | Tumor_G2 |
| 13292 | DUOXA1   | 6.933004164 | Tumor_G2 |
| 13293 | DUOX2    | 8.064544913 | Tumor_G2 |
| 13294 | DUOXA2   | 6.202314076 | Tumor_G2 |
| 13295 | NDUFA1   | 8.657077369 | Tumor_G2 |
| 13296 | NDUFA2   | 7.216611459 | Tumor_G2 |
| 13297 | NDUFA8   | 7.666646298 | Tumor_G2 |
| 13298 | NDUFB1   | 6.316301305 | Tumor_G2 |
| 13299 | NDUFB10  | 7.234527361 | Tumor_G2 |
| 13300 | NDUFB2   | 7.768752778 | Tumor_G2 |
| 13301 | NDUFB3   | 6.998358871 | Tumor_G2 |
| 13302 | NDUFB7   | 8.862412672 | Tumor_G2 |
| 13303 | CYC1     | 7.844658284 | Tumor_G2 |
| 13304 | ETFB     | 4.933945023 | Tumor_G2 |
| 13305 | UQCR10   | 8.249745307 | Tumor_G2 |
| 13306 | UQCRQ    | 7.6469845   | Tumor_G2 |
| 13307 | UQCC3    | 3.981920256 | Tumor_G2 |
| 13308 | COX15    | 4.633575186 | Tumor_G2 |
| 13309 | COX5A    | 7.739392468 | Tumor_G2 |
| 13310 | COX6B1   | 9.110702526 | Tumor_G2 |
| 13311 | COX6C    | 6.982333407 | Tumor_G2 |
| 13312 | COX7A2   | 7.44033675  | Tumor_G2 |
| 13313 | COX7B    | 7.279077382 | Tumor_G2 |
| 13314 | COX8A    | 9.976607447 | Tumor_G2 |
| 13315 | SCO1     | 3.191744493 | Tumor_G2 |
| 13316 | SURF1    | 5.888116769 | Tumor_G2 |
| 13317 | ATP6V1E1 | 6.997661756 | Tumor_G2 |
| 13318 | DLAT     | 5.625403701 | Tumor_G2 |

|       |          |             |          |
|-------|----------|-------------|----------|
| 13319 | PDC      | 0           | Tumor_G2 |
| 13320 | SUCLG2   | 6.445609136 | Tumor_G2 |
| 13321 | SLC25A5  | 9.038401542 | Tumor_G2 |
| 13322 | UCP2     | 6.99267528  | Tumor_G2 |
| 13323 | SOD2     | 4.867184241 | Tumor_G2 |
| 13324 | NOX4     | 0.591197731 | Tumor_G2 |
| 13325 | DUOX1    | 5.979994292 | Tumor_G2 |
| 13326 | DUOXA1   | 5.420406898 | Tumor_G2 |
| 13327 | DUOX2    | 6.794768629 | Tumor_G2 |
| 13328 | DUOXA2   | 4.600324818 | Tumor_G2 |
| 13329 | NDUFA1   | 7.999826841 | Tumor_G2 |
| 13330 | NDUFA2   | 6.897713229 | Tumor_G2 |
| 13331 | NDUFA8   | 7.238887047 | Tumor_G2 |
| 13332 | NDUFB1   | 5.743676446 | Tumor_G2 |
| 13333 | NDUFB10  | 7.4353738   | Tumor_G2 |
| 13334 | NDUFB2   | 7.158168658 | Tumor_G2 |
| 13335 | NDUFB3   | 6.488352652 | Tumor_G2 |
| 13336 | NDUFB7   | 8.797513893 | Tumor_G2 |
| 13337 | CYC1     | 7.169932019 | Tumor_G2 |
| 13338 | ETFB     | 4.899127237 | Tumor_G2 |
| 13339 | UQCR10   | 7.804413695 | Tumor_G2 |
| 13340 | UQCRQ    | 7.422771169 | Tumor_G2 |
| 13341 | UQCC3    | 4.448642613 | Tumor_G2 |
| 13342 | COX15    | 4.598495258 | Tumor_G2 |
| 13343 | COX5A    | 7.270438905 | Tumor_G2 |
| 13344 | COX6B1   | 8.685469234 | Tumor_G2 |
| 13345 | COX6C    | 6.55681643  | Tumor_G2 |
| 13346 | COX7A2   | 6.957876599 | Tumor_G2 |
| 13347 | COX7B    | 6.238081564 | Tumor_G2 |
| 13348 | COX8A    | 9.638770558 | Tumor_G2 |
| 13349 | SCO1     | 3.549173906 | Tumor_G2 |
| 13350 | SURF1    | 6.422475246 | Tumor_G2 |
| 13351 | ATP6V1E1 | 7.617102222 | Tumor_G2 |
| 13352 | DLAT     | 5.289202688 | Tumor_G2 |
| 13353 | PDC      | 0.3471465   | Tumor_G2 |
| 13354 | SUCLG2   | 6.531049431 | Tumor_G2 |
| 13355 | SLC25A5  | 8.391804086 | Tumor_G2 |
| 13356 | UCP2     | 8.501194885 | Tumor_G2 |
| 13357 | SOD2     | 4.755140149 | Tumor_G2 |
| 13358 | NOX4     | 1.423895376 | Tumor_G2 |

|       |          |             |          |
|-------|----------|-------------|----------|
| 13359 | DUOX1    | 5.943242592 | Tumor_G2 |
| 13360 | DUOXA1   | 6.540995601 | Tumor_G2 |
| 13361 | DUOX2    | 7.028276747 | Tumor_G2 |
| 13362 | DUOXA2   | 4.381882593 | Tumor_G2 |
| 13363 | NDUFA1   | 8.447273352 | Tumor_G2 |
| 13364 | NDUFA2   | 7.302429763 | Tumor_G2 |
| 13365 | NDUFA8   | 7.553534881 | Tumor_G2 |
| 13366 | NDUFB1   | 6.393232836 | Tumor_G2 |
| 13367 | NDUFB10  | 8.000751443 | Tumor_G2 |
| 13368 | NDUFB2   | 7.162329284 | Tumor_G2 |
| 13369 | NDUFB3   | 6.591235389 | Tumor_G2 |
| 13370 | NDUFB7   | 9.201923206 | Tumor_G2 |
| 13371 | CYC1     | 7.501543716 | Tumor_G2 |
| 13372 | ETFB     | 5.628119805 | Tumor_G2 |
| 13373 | UQCR10   | 7.421882957 | Tumor_G2 |
| 13374 | UQCRQ    | 7.667032913 | Tumor_G2 |
| 13375 | UQCC3    | 5.276250289 | Tumor_G2 |
| 13376 | COX15    | 5.421974902 | Tumor_G2 |
| 13377 | COX5A    | 7.454805143 | Tumor_G2 |
| 13378 | COX6B1   | 8.892804686 | Tumor_G2 |
| 13379 | COX6C    | 6.86962041  | Tumor_G2 |
| 13380 | COX7A2   | 7.002174228 | Tumor_G2 |
| 13381 | COX7B    | 6.326152647 | Tumor_G2 |
| 13382 | COX8A    | 10.29412919 | Tumor_G2 |
| 13383 | SCO1     | 3.632876249 | Tumor_G2 |
| 13384 | SURF1    | 7.183550105 | Tumor_G2 |
| 13385 | ATP6V1E1 | 7.13959367  | Tumor_G2 |
| 13386 | DLAT     | 5.197376305 | Tumor_G2 |
| 13387 | PDC      | 0.224067608 | Tumor_G2 |
| 13388 | SUCLG2   | 6.424274129 | Tumor_G2 |
| 13389 | SLC25A5  | 8.37605138  | Tumor_G2 |
| 13390 | UCP2     | 9.231370535 | Tumor_G2 |
| 13391 | SOD2     | 4.387021318 | Tumor_G2 |
| 13392 | NOX4     | 1.882364659 | Tumor_G2 |
| 13393 | DUOX1    | 7.828799558 | Tumor_G2 |
| 13394 | DUOXA1   | 7.831978388 | Tumor_G2 |
| 13395 | DUOX2    | 9.3468355   | Tumor_G2 |
| 13396 | DUOXA2   | 6.459392198 | Tumor_G2 |
| 13397 | NDUFA1   | 8.102036245 | Tumor_G2 |
| 13398 | NDUFA2   | 6.749385578 | Tumor_G2 |

|       |          |             |          |
|-------|----------|-------------|----------|
| 13399 | NDUFA8   | 7.221163294 | Tumor_G2 |
| 13400 | NDUFB1   | 5.428326884 | Tumor_G2 |
| 13401 | NDUFB10  | 7.137801302 | Tumor_G2 |
| 13402 | NDUFB2   | 6.668783585 | Tumor_G2 |
| 13403 | NDUFB3   | 6.435948649 | Tumor_G2 |
| 13404 | NDUFB7   | 7.669369351 | Tumor_G2 |
| 13405 | CYC1     | 6.991733788 | Tumor_G2 |
| 13406 | ETFB     | 5.570711769 | Tumor_G2 |
| 13407 | UQCR10   | 6.792569732 | Tumor_G2 |
| 13408 | UQCRQ    | 7.045841046 | Tumor_G2 |
| 13409 | UQCC3    | 4.115591535 | Tumor_G2 |
| 13410 | COX15    | 5.55319949  | Tumor_G2 |
| 13411 | COX5A    | 6.278596226 | Tumor_G2 |
| 13412 | COX6B1   | 8.805385692 | Tumor_G2 |
| 13413 | COX6C    | 6.194732446 | Tumor_G2 |
| 13414 | COX7A2   | 6.847915213 | Tumor_G2 |
| 13415 | COX7B    | 5.81383878  | Tumor_G2 |
| 13416 | COX8A    | 9.373597744 | Tumor_G2 |
| 13417 | SCO1     | 3.791993567 | Tumor_G2 |
| 13418 | SURF1    | 6.561741826 | Tumor_G2 |
| 13419 | ATP6V1E1 | 6.677037227 | Tumor_G2 |
| 13420 | DLAT     | 5.521316321 | Tumor_G2 |
| 13421 | PDC      | 0.373499368 | Tumor_G2 |
| 13422 | SUCLG2   | 6.411224389 | Tumor_G2 |
| 13423 | SLC25A5  | 7.435730279 | Tumor_G2 |
| 13424 | UCP2     | 5.775164747 | Tumor_G2 |
| 13425 | SOD2     | 4.519008162 | Tumor_G2 |
| 13426 | NOX4     | 0.889895189 | Tumor_G2 |
| 13427 | DUOX1    | 7.857998635 | Tumor_G2 |
| 13428 | DUOXA1   | 7.283736514 | Tumor_G2 |
| 13429 | DUOX2    | 8.557606206 | Tumor_G2 |
| 13430 | DUOXA2   | 6.119782626 | Tumor_G2 |
| 13431 | NDUFA1   | 7.828062425 | Tumor_G2 |
| 13432 | NDUFA2   | 6.265848183 | Tumor_G2 |
| 13433 | NDUFA8   | 6.755451343 | Tumor_G2 |
| 13434 | NDUFB1   | 5.70053076  | Tumor_G2 |
| 13435 | NDUFB10  | 7.378178871 | Tumor_G2 |
| 13436 | NDUFB2   | 5.995990726 | Tumor_G2 |
| 13437 | NDUFB3   | 6.104321158 | Tumor_G2 |
| 13438 | NDUFB7   | 8.260691147 | Tumor_G2 |



|       |          |             |          |
|-------|----------|-------------|----------|
| 13439 | CYC1     | 6.552248352 | Tumor_G2 |
| 13440 | ETFB     | 4.794093301 | Tumor_G2 |
| 13441 | UQCR10   | 7.274280722 | Tumor_G2 |
| 13442 | UQCRQ    | 6.90990583  | Tumor_G2 |
| 13443 | UQCC3    | 4.217241756 | Tumor_G2 |
| 13444 | COX15    | 4.919047622 | Tumor_G2 |
| 13445 | COX5A    | 7.001172664 | Tumor_G2 |
| 13446 | COX6B1   | 8.254244904 | Tumor_G2 |
| 13447 | COX6C    | 6.159650397 | Tumor_G2 |
| 13448 | COX7A2   | 6.405783816 | Tumor_G2 |
| 13449 | COX7B    | 5.750787544 | Tumor_G2 |
| 13450 | COX8A    | 9.145627798 | Tumor_G2 |
| 13451 | SCO1     | 3.421916967 | Tumor_G2 |
| 13452 | SURF1    | 6.368527734 | Tumor_G2 |
| 13453 | ATP6V1E1 | 6.482023762 | Tumor_G2 |
| 13454 | DLAT     | 4.8113654   | Tumor_G2 |
| 13455 | PDC      | 0.223069469 | Tumor_G2 |
| 13456 | SUCLG2   | 5.905151447 | Tumor_G2 |
| 13457 | SLC25A5  | 7.534063902 | Tumor_G2 |
| 13458 | UCP2     | 8.927927106 | Tumor_G2 |
| 13459 | SOD2     | 5.307757542 | Tumor_G2 |
| 13460 | NOX4     | 1.675616087 | Tumor_G2 |
| 13461 | DUOX1    | 7.712677783 | Tumor_G2 |
| 13462 | DUOXA1   | 7.89738328  | Tumor_G2 |
| 13463 | DUOX2    | 8.325882052 | Tumor_G2 |
| 13464 | DUOXA2   | 5.791735775 | Tumor_G2 |
| 13465 | NDUFA1   | 8.39384811  | Tumor_G2 |
| 13466 | NDUFA2   | 7.164338589 | Tumor_G2 |
| 13467 | NDUFA8   | 7.022363702 | Tumor_G2 |
| 13468 | NDUFB1   | 5.851382773 | Tumor_G2 |
| 13469 | NDUFB10  | 7.913908807 | Tumor_G2 |
| 13470 | NDUFB2   | 6.503212239 | Tumor_G2 |
| 13471 | NDUFB3   | 6.235026672 | Tumor_G2 |
| 13472 | NDUFB7   | 9.187585223 | Tumor_G2 |
| 13473 | CYC1     | 7.138774415 | Tumor_G2 |
| 13474 | ETFB     | 4.322907308 | Tumor_G2 |
| 13475 | UQCR10   | 7.437356303 | Tumor_G2 |
| 13476 | UQCRQ    | 7.513445958 | Tumor_G2 |
| 13477 | UQCC3    | 5.102659833 | Tumor_G2 |
| 13478 | COX15    | 4.941013137 | Tumor_G2 |

|       |          |             |          |
|-------|----------|-------------|----------|
| 13479 | COX5A    | 7.418582593 | Tumor_G2 |
| 13480 | COX6B1   | 9.137720625 | Tumor_G2 |
| 13481 | COX6C    | 6.533253268 | Tumor_G2 |
| 13482 | COX7A2   | 7.106953998 | Tumor_G2 |
| 13483 | COX7B    | 6.054674776 | Tumor_G2 |
| 13484 | COX8A    | 9.688084915 | Tumor_G2 |
| 13485 | SCO1     | 3.357991322 | Tumor_G2 |
| 13486 | SURF1    | 6.732929932 | Tumor_G2 |
| 13487 | ATP6V1E1 | 6.837096569 | Tumor_G2 |
| 13488 | DLAT     | 4.834421506 | Tumor_G2 |
| 13489 | PDC      | 0.151832573 | Tumor_G2 |
| 13490 | SUCLG2   | 5.717922145 | Tumor_G2 |
| 13491 | SLC25A5  | 7.805878096 | Tumor_G2 |
| 13492 | UCP2     | 8.468464339 | Tumor_G2 |
| 13493 | SOD2     | 4.431493359 | Tumor_G2 |
| 13494 | NOX4     | 1.516405781 | Tumor_G2 |
| 13495 | DUOX1    | 5.759604541 | Tumor_G2 |
| 13496 | DUOXA1   | 6.574438532 | Tumor_G2 |
| 13497 | DUOX2    | 7.026586514 | Tumor_G2 |
| 13498 | DUOXA2   | 7.000176658 | Tumor_G2 |
| 13499 | NDUFA1   | 8.270736638 | Tumor_G2 |
| 13500 | NDUFA2   | 7.028857637 | Tumor_G2 |
| 13501 | NDUFA8   | 7.102869396 | Tumor_G2 |
| 13502 | NDUFB1   | 6.046856863 | Tumor_G2 |
| 13503 | NDUFB10  | 7.519918083 | Tumor_G2 |
| 13504 | NDUFB2   | 6.956528412 | Tumor_G2 |
| 13505 | NDUFB3   | 6.665467777 | Tumor_G2 |
| 13506 | NDUFB7   | 8.751614474 | Tumor_G2 |
| 13507 | CYC1     | 6.983857453 | Tumor_G2 |
| 13508 | ETFB     | 4.883347306 | Tumor_G2 |
| 13509 | UQCR10   | 7.809278654 | Tumor_G2 |
| 13510 | UQCRQ    | 7.42316854  | Tumor_G2 |
| 13511 | UQCC3    | 4.760380495 | Tumor_G2 |
| 13512 | COX15    | 4.962978844 | Tumor_G2 |
| 13513 | COX5A    | 7.178779683 | Tumor_G2 |
| 13514 | COX6B1   | 8.786881701 | Tumor_G2 |
| 13515 | COX6C    | 6.467363811 | Tumor_G2 |
| 13516 | COX7A2   | 7.135016748 | Tumor_G2 |
| 13517 | COX7B    | 6.267755364 | Tumor_G2 |
| 13518 | COX8A    | 9.83031883  | Tumor_G2 |

|       |          |             |          |
|-------|----------|-------------|----------|
| 13519 | SCO1     | 3.666468977 | Tumor_G2 |
| 13520 | SURF1    | 6.745380531 | Tumor_G2 |
| 13521 | ATP6V1E1 | 6.803349738 | Tumor_G2 |
| 13522 | DLAT     | 5.258321889 | Tumor_G2 |
| 13523 | PDC      | 0.183995711 | Tumor_G2 |
| 13524 | SUCLG2   | 6.043451587 | Tumor_G2 |
| 13525 | SLC25A5  | 7.985063391 | Tumor_G2 |
| 13526 | UCP2     | 7.57357888  | Tumor_G2 |
| 13527 | SOD2     | 4.710248821 | Tumor_G2 |
| 13528 | NOX4     | 0.343584638 | Tumor_G2 |
| 13529 | DUOX1    | 7.332219618 | Tumor_G2 |
| 13530 | DUOXA1   | 7.392292972 | Tumor_G2 |
| 13531 | DUOX2    | 8.410812909 | Tumor_G2 |
| 13532 | DUOXA2   | 7.141408635 | Tumor_G2 |
| 13533 | NDUFA1   | 7.726912559 | Tumor_G2 |
| 13534 | NDUFA2   | 6.632860827 | Tumor_G2 |
| 13535 | NDUFA8   | 6.856024738 | Tumor_G2 |
| 13536 | NDUFB1   | 5.597543633 | Tumor_G2 |
| 13537 | NDUFB10  | 7.129035815 | Tumor_G2 |
| 13538 | NDUFB2   | 6.467356485 | Tumor_G2 |
| 13539 | NDUFB3   | 6.163989545 | Tumor_G2 |
| 13540 | NDUFB7   | 8.40264847  | Tumor_G2 |
| 13541 | CYC1     | 6.736280018 | Tumor_G2 |
| 13542 | ETFB     | 4.769761684 | Tumor_G2 |
| 13543 | UQCR10   | 7.393824252 | Tumor_G2 |
| 13544 | UQCRQ    | 7.277395357 | Tumor_G2 |
| 13545 | UQCC3    | 4.057664017 | Tumor_G2 |
| 13546 | COX15    | 4.518190733 | Tumor_G2 |
| 13547 | COX5A    | 6.83680995  | Tumor_G2 |
| 13548 | COX6B1   | 8.456085133 | Tumor_G2 |
| 13549 | COX6C    | 6.3992582   | Tumor_G2 |
| 13550 | COX7A2   | 6.736694939 | Tumor_G2 |
| 13551 | COX7B    | 5.928818135 | Tumor_G2 |
| 13552 | COX8A    | 9.148754145 | Tumor_G2 |
| 13553 | SCO1     | 3.297467168 | Tumor_G2 |
| 13554 | SURF1    | 5.934990917 | Tumor_G2 |
| 13555 | ATP6V1E1 | 6.934544437 | Tumor_G2 |
| 13556 | DLAT     | 4.854769466 | Tumor_G2 |
| 13557 | PDC      | 0.198783684 | Tumor_G2 |
| 13558 | SUCLG2   | 6.009891756 | Tumor_G2 |

|       |          |             |          |
|-------|----------|-------------|----------|
| 13559 | SLC25A5  | 8.036568883 | Tumor_G2 |
| 13560 | UCP2     | 8.694896166 | Tumor_G2 |
| 13561 | SOD2     | 5.021452454 | Tumor_G2 |
| 13562 | NOX4     | 2.744799004 | Tumor_G2 |
| 13563 | DUOX1    | 6.716647952 | Tumor_G2 |
| 13564 | DUOXA1   | 6.893569671 | Tumor_G2 |
| 13565 | DUOX2    | 7.059853394 | Tumor_G2 |
| 13566 | DUOXA2   | 4.630963452 | Tumor_G2 |
| 13567 | NDUFA1   | 8.017081551 | Tumor_G2 |
| 13568 | NDUFA2   | 6.723869122 | Tumor_G2 |
| 13569 | NDUFA8   | 7.220054461 | Tumor_G2 |
| 13570 | NDUFB1   | 6.16092505  | Tumor_G2 |
| 13571 | NDUFB10  | 7.556085435 | Tumor_G2 |
| 13572 | NDUFB2   | 6.893040992 | Tumor_G2 |
| 13573 | NDUFB3   | 6.545177798 | Tumor_G2 |
| 13574 | NDUFB7   | 8.659970668 | Tumor_G2 |
| 13575 | CYC1     | 7.006674605 | Tumor_G2 |
| 13576 | ETFB     | 5.424131159 | Tumor_G2 |
| 13577 | UQCR10   | 7.766115698 | Tumor_G2 |
| 13578 | UQCRQ    | 7.534741475 | Tumor_G2 |
| 13579 | UQCC3    | 4.373569706 | Tumor_G2 |
| 13580 | COX15    | 4.90378913  | Tumor_G2 |
| 13581 | COX5A    | 7.013546714 | Tumor_G2 |
| 13582 | COX6B1   | 8.615552662 | Tumor_G2 |
| 13583 | COX6C    | 6.781184913 | Tumor_G2 |
| 13584 | COX7A2   | 7.025530528 | Tumor_G2 |
| 13585 | COX7B    | 6.456880555 | Tumor_G2 |
| 13586 | COX8A    | 9.727191017 | Tumor_G2 |
| 13587 | SCO1     | 3.790320867 | Tumor_G2 |
| 13588 | SURF1    | 6.552397435 | Tumor_G2 |
| 13589 | ATP6V1E1 | 6.91452     | Tumor_G2 |
| 13590 | DLAT     | 5.192047813 | Tumor_G2 |
| 13591 | PDC      | 0.177730101 | Tumor_G2 |
| 13592 | SUCLG2   | 6.033624537 | Tumor_G2 |
| 13593 | SLC25A5  | 8.064233132 | Tumor_G2 |
| 13594 | UCP2     | 7.715599748 | Tumor_G2 |
| 13595 | SOD2     | 4.407510054 | Tumor_G2 |
| 13596 | NOX4     | 2.029022491 | Tumor_G2 |
| 13597 | DUOX1    | 8.389936889 | Tumor_G2 |
| 13598 | DUOXA1   | 8.046142036 | Tumor_G2 |

|       |          |             |          |
|-------|----------|-------------|----------|
| 13599 | DUOX2    | 8.701986447 | Tumor_G2 |
| 13600 | DUOXA2   | 6.854458093 | Tumor_G2 |
| 13601 | NDUFA1   | 7.884470685 | Tumor_G2 |
| 13602 | NDUFA2   | 6.104673095 | Tumor_G2 |
| 13603 | NDUFA8   | 7.092753323 | Tumor_G2 |
| 13604 | NDUFB1   | 5.468745719 | Tumor_G2 |
| 13605 | NDUFB10  | 7.397622651 | Tumor_G2 |
| 13606 | NDUFB2   | 5.771250205 | Tumor_G2 |
| 13607 | NDUFB3   | 6.024663494 | Tumor_G2 |
| 13608 | NDUFB7   | 8.510377177 | Tumor_G2 |
| 13609 | CYC1     | 6.622743939 | Tumor_G2 |
| 13610 | ETFB     | 5.002430999 | Tumor_G2 |
| 13611 | UQCR10   | 6.983351792 | Tumor_G2 |
| 13612 | UQCRQ    | 6.942238296 | Tumor_G2 |
| 13613 | UQCC3    | 3.945205695 | Tumor_G2 |
| 13614 | COX15    | 4.893540369 | Tumor_G2 |
| 13615 | COX5A    | 6.644851261 | Tumor_G2 |
| 13616 | COX6B1   | 8.943098945 | Tumor_G2 |
| 13617 | COX6C    | 5.962868046 | Tumor_G2 |
| 13618 | COX7A2   | 6.706553871 | Tumor_G2 |
| 13619 | COX7B    | 6.163553315 | Tumor_G2 |
| 13620 | COX8A    | 9.115208915 | Tumor_G2 |
| 13621 | SCO1     | 3.381426795 | Tumor_G2 |
| 13622 | SURF1    | 6.08236262  | Tumor_G2 |
| 13623 | ATP6V1E1 | 6.297409585 | Tumor_G2 |
| 13624 | DLAT     | 5.004848523 | Tumor_G2 |
| 13625 | PDC      | 0.10245135  | Tumor_G2 |
| 13626 | SUCLG2   | 6.000043963 | Tumor_G2 |
| 13627 | SLC25A5  | 8.009054193 | Tumor_G2 |
| 13628 | UCP2     | 8.848954275 | Tumor_G2 |
| 13629 | SOD2     | 5.399296659 | Tumor_G2 |
| 13630 | NOX4     | 2.757667304 | Tumor_G2 |
| 13631 | DUOX1    | 7.090320524 | Tumor_G2 |
| 13632 | DUOXA1   | 7.226233656 | Tumor_G2 |
| 13633 | DUOX2    | 8.076012817 | Tumor_G2 |
| 13634 | DUOXA2   | 4.658237278 | Tumor_G2 |
| 13635 | NDUFA1   | 8.396266458 | Tumor_G2 |
| 13636 | NDUFA2   | 6.921812661 | Tumor_G2 |
| 13637 | NDUFA8   | 7.268057541 | Tumor_G2 |
| 13638 | NDUFB1   | 6.141643615 | Tumor_G2 |

|       |          |             |          |
|-------|----------|-------------|----------|
| 13639 | NDUFB10  | 7.72655784  | Tumor_G2 |
| 13640 | NDUFB2   | 6.875744657 | Tumor_G2 |
| 13641 | NDUFB3   | 6.706406016 | Tumor_G2 |
| 13642 | NDUFB7   | 8.549314506 | Tumor_G2 |
| 13643 | CYC1     | 7.483421845 | Tumor_G2 |
| 13644 | ETFB     | 5.481779207 | Tumor_G2 |
| 13645 | UQCR10   | 7.868968498 | Tumor_G2 |
| 13646 | UQCRQ    | 7.209020856 | Tumor_G2 |
| 13647 | UQCC3    | 4.224561828 | Tumor_G2 |
| 13648 | COX15    | 5.542899103 | Tumor_G2 |
| 13649 | COX5A    | 7.376794671 | Tumor_G2 |
| 13650 | COX6B1   | 8.716166747 | Tumor_G2 |
| 13651 | COX6C    | 6.709214858 | Tumor_G2 |
| 13652 | COX7A2   | 7.014016729 | Tumor_G2 |
| 13653 | COX7B    | 6.258559587 | Tumor_G2 |
| 13654 | COX8A    | 10.04217495 | Tumor_G2 |
| 13655 | SCO1     | 4.256747347 | Tumor_G2 |
| 13656 | SURF1    | 6.579649756 | Tumor_G2 |
| 13657 | ATP6V1E1 | 6.73300723  | Tumor_G2 |
| 13658 | DLAT     | 5.243272611 | Tumor_G2 |
| 13659 | PDC      | 0.22021293  | Tumor_G2 |
| 13660 | SUCLG2   | 6.534958073 | Tumor_G2 |
| 13661 | SLC25A5  | 8.989453141 | Tumor_G2 |
| 13662 | UCP2     | 5.129005658 | Tumor_G2 |
| 13663 | SOD2     | 4.497143923 | Tumor_G2 |
| 13664 | NOX4     | 1.746063778 | Tumor_G2 |
| 13665 | DUOX1    | 7.664571329 | Tumor_G2 |
| 13666 | DUOXA1   | 7.193242367 | Tumor_G2 |
| 13667 | DUOX2    | 10.75549818 | Tumor_G2 |
| 13668 | DUOXA2   | 8.086142516 | Tumor_G2 |
| 13669 | NDUFA1   | 8.008720085 | Tumor_G2 |
| 13670 | NDUFA2   | 6.937481582 | Tumor_G2 |
| 13671 | NDUFA8   | 6.918839204 | Tumor_G2 |
| 13672 | NDUFB1   | 5.689960457 | Tumor_G2 |
| 13673 | NDUFB10  | 7.611912573 | Tumor_G2 |
| 13674 | NDUFB2   | 6.834731142 | Tumor_G2 |
| 13675 | NDUFB3   | 6.282567932 | Tumor_G2 |
| 13676 | NDUFB7   | 8.7577553   | Tumor_G2 |
| 13677 | CYC1     | 7.232876297 | Tumor_G2 |
| 13678 | ETFB     | 5.039662893 | Tumor_G2 |

|       |          |             |          |
|-------|----------|-------------|----------|
| 13679 | UQCR10   | 7.927355372 | Tumor_G2 |
| 13680 | UQCRQ    | 7.153441547 | Tumor_G2 |
| 13681 | UQCC3    | 4.495428609 | Tumor_G2 |
| 13682 | COX15    | 4.985561931 | Tumor_G2 |
| 13683 | COX5A    | 7.003630927 | Tumor_G2 |
| 13684 | COX6B1   | 8.642127948 | Tumor_G2 |
| 13685 | COX6C    | 6.492020716 | Tumor_G2 |
| 13686 | COX7A2   | 6.836332109 | Tumor_G2 |
| 13687 | COX7B    | 5.910211265 | Tumor_G2 |
| 13688 | COX8A    | 9.578455768 | Tumor_G2 |
| 13689 | SCO1     | 3.19354563  | Tumor_G2 |
| 13690 | SURF1    | 6.258967178 | Tumor_G2 |
| 13691 | ATP6V1E1 | 7.233449681 | Tumor_G2 |
| 13692 | DLAT     | 5.154747951 | Tumor_G2 |
| 13693 | PDC      | 0.267402509 | Tumor_G2 |
| 13694 | SUCLG2   | 6.474161966 | Tumor_G2 |
| 13695 | SLC25A5  | 8.122219127 | Tumor_G2 |
| 13696 | UCP2     | 8.708953538 | Tumor_G2 |
| 13697 | SOD2     | 4.491896992 | Tumor_G2 |
| 13698 | NOX4     | 1.394755368 | Tumor_G2 |
| 13699 | DUOX1    | 6.55079752  | Tumor_G2 |
| 13700 | DUOXA1   | 6.468726426 | Tumor_G2 |
| 13701 | DUOX2    | 6.859874571 | Tumor_G2 |
| 13702 | DUOXA2   | 4.814192429 | Tumor_G2 |
| 13703 | NDUFA1   | 7.992152681 | Tumor_G2 |
| 13704 | NDUFA2   | 6.890180555 | Tumor_G2 |
| 13705 | NDUFA8   | 6.981842054 | Tumor_G2 |
| 13706 | NDUFB1   | 5.473137918 | Tumor_G2 |
| 13707 | NDUFB10  | 7.665595392 | Tumor_G2 |
| 13708 | NDUFB2   | 6.494063076 | Tumor_G2 |
| 13709 | NDUFB3   | 6.233242999 | Tumor_G2 |
| 13710 | NDUFB7   | 8.667922161 | Tumor_G2 |
| 13711 | CYC1     | 7.100028066 | Tumor_G2 |
| 13712 | ETFB     | 5.172785073 | Tumor_G2 |
| 13713 | UQCR10   | 7.485435437 | Tumor_G2 |
| 13714 | UQCRQ    | 7.33086508  | Tumor_G2 |
| 13715 | UQCC3    | 4.430597167 | Tumor_G2 |
| 13716 | COX15    | 4.755143268 | Tumor_G2 |
| 13717 | COX5A    | 7.063342049 | Tumor_G2 |
| 13718 | COX6B1   | 8.846416663 | Tumor_G2 |

|       |          |             |          |
|-------|----------|-------------|----------|
| 13719 | COX6C    | 6.417097048 | Tumor_G2 |
| 13720 | COX7A2   | 7.049684648 | Tumor_G2 |
| 13721 | COX7B    | 6.019307009 | Tumor_G2 |
| 13722 | COX8A    | 9.536942977 | Tumor_G2 |
| 13723 | SCO1     | 3.086622245 | Tumor_G2 |
| 13724 | SURF1    | 6.357727092 | Tumor_G2 |
| 13725 | ATP6V1E1 | 7.163500611 | Tumor_G2 |
| 13726 | DLAT     | 5.034592291 | Tumor_G2 |
| 13727 | PDC      | 0.043468941 | Tumor_G2 |
| 13728 | SUCLG2   | 6.209381253 | Tumor_G2 |
| 13729 | SLC25A5  | 8.270480478 | Tumor_G2 |
| 13730 | UCP2     | 8.290209736 | Tumor_G2 |
| 13731 | SOD2     | 4.986804207 | Tumor_G2 |
| 13732 | NOX4     | 2.182968559 | Tumor_G2 |
| 13733 | DUOX1    | 6.704672215 | Tumor_G2 |
| 13734 | DUOXA1   | 6.592130371 | Tumor_G2 |
| 13735 | DUOX2    | 6.698708479 | Tumor_G2 |
| 13736 | DUOXA2   | 4.529758365 | Tumor_G2 |
| 13737 | NDUFA1   | 8.120752713 | Tumor_G2 |
| 13738 | NDUFA2   | 6.955881689 | Tumor_G2 |
| 13739 | NDUFA8   | 6.90882775  | Tumor_G2 |
| 13740 | NDUFB1   | 6.050096051 | Tumor_G2 |
| 13741 | NDUFB10  | 7.598172438 | Tumor_G2 |
| 13742 | NDUFB2   | 6.85840571  | Tumor_G2 |
| 13743 | NDUFB3   | 6.178379486 | Tumor_G2 |
| 13744 | NDUFB7   | 8.885285969 | Tumor_G2 |
| 13745 | CYC1     | 6.99790549  | Tumor_G2 |
| 13746 | ETFB     | 4.983396721 | Tumor_G2 |
| 13747 | UQCR10   | 7.854800879 | Tumor_G2 |
| 13748 | UQCRQ    | 7.412643622 | Tumor_G2 |
| 13749 | UQCC3    | 4.48932734  | Tumor_G2 |
| 13750 | COX15    | 4.343497398 | Tumor_G2 |
| 13751 | COX5A    | 7.02793435  | Tumor_G2 |
| 13752 | COX6B1   | 8.886159001 | Tumor_G2 |
| 13753 | COX6C    | 6.665469735 | Tumor_G2 |
| 13754 | COX7A2   | 7.074939498 | Tumor_G2 |
| 13755 | COX7B    | 6.097257995 | Tumor_G2 |
| 13756 | COX8A    | 9.74200465  | Tumor_G2 |
| 13757 | SCO1     | 2.511094207 | Tumor_G2 |
| 13758 | SURF1    | 6.19695367  | Tumor_G2 |



|       |          |             |          |
|-------|----------|-------------|----------|
| 13759 | ATP6V1E1 | 7.156010268 | Tumor_G2 |
| 13760 | DLAT     | 4.468305619 | Tumor_G2 |
| 13761 | PDC      | 0.106226084 | Tumor_G2 |
| 13762 | SUCLG2   | 6.157038971 | Tumor_G2 |
| 13763 | SLC25A5  | 7.881656749 | Tumor_G2 |
| 13764 | UCP2     | 8.484131683 | Tumor_G2 |
| 13765 | SOD2     | 4.74344336  | Tumor_G2 |
| 13766 | NOX4     | 1.380070613 | Tumor_G2 |
| 13767 | DUOX1    | 5.851806442 | Tumor_G2 |
| 13768 | DUOXA1   | 5.988006468 | Tumor_G2 |
| 13769 | DUOX2    | 6.395561831 | Tumor_G2 |
| 13770 | DUOXA2   | 4.065511419 | Tumor_G2 |
| 13771 | NDUFA1   | 7.988018411 | Tumor_G2 |
| 13772 | NDUFA2   | 6.765523165 | Tumor_G2 |
| 13773 | NDUFA8   | 6.99809665  | Tumor_G2 |
| 13774 | NDUFB1   | 5.781388987 | Tumor_G2 |
| 13775 | NDUFB10  | 7.586735396 | Tumor_G2 |
| 13776 | NDUFB2   | 6.62791168  | Tumor_G2 |
| 13777 | NDUFB3   | 6.40190017  | Tumor_G2 |
| 13778 | NDUFB7   | 8.529726943 | Tumor_G2 |
| 13779 | CYC1     | 6.820959596 | Tumor_G2 |
| 13780 | ETFB     | 4.83483009  | Tumor_G2 |
| 13781 | UQCR10   | 7.729015673 | Tumor_G2 |
| 13782 | UQCRQ    | 7.404420075 | Tumor_G2 |
| 13783 | UQCC3    | 4.229476705 | Tumor_G2 |
| 13784 | COX15    | 4.553261879 | Tumor_G2 |
| 13785 | COX5A    | 7.125223126 | Tumor_G2 |
| 13786 | COX6B1   | 8.679560257 | Tumor_G2 |
| 13787 | COX6C    | 6.391305147 | Tumor_G2 |
| 13788 | COX7A2   | 6.873959437 | Tumor_G2 |
| 13789 | COX7B    | 5.952109526 | Tumor_G2 |
| 13790 | COX8A    | 9.199767461 | Tumor_G2 |
| 13791 | SCO1     | 3.392571314 | Tumor_G2 |
| 13792 | SURF1    | 6.530317896 | Tumor_G2 |
| 13793 | ATP6V1E1 | 7.137186976 | Tumor_G2 |
| 13794 | DLAT     | 5.184518137 | Tumor_G2 |
| 13795 | PDC      | 0.097163536 | Tumor_G2 |
| 13796 | SUCLG2   | 6.248043076 | Tumor_G2 |
| 13797 | SLC25A5  | 8.057104652 | Tumor_G2 |
| 13798 | UCP2     | 8.109963978 | Tumor_G2 |

|       |          |             |          |
|-------|----------|-------------|----------|
| 13799 | SOD2     | 5.606777547 | Tumor_G2 |
| 13800 | NOX4     | 3.40320714  | Tumor_G2 |
| 13801 | DUOX1    | 5.921988072 | Tumor_G2 |
| 13802 | DUOXA1   | 6.286613815 | Tumor_G2 |
| 13803 | DUOX2    | 6.246064405 | Tumor_G2 |
| 13804 | DUOXA2   | 4.354013478 | Tumor_G2 |
| 13805 | NDUFA1   | 8.168530261 | Tumor_G2 |
| 13806 | NDUFA2   | 7.052510234 | Tumor_G2 |
| 13807 | NDUFA8   | 7.18817972  | Tumor_G2 |
| 13808 | NDUFB1   | 6.192456422 | Tumor_G2 |
| 13809 | NDUFB10  | 7.643234076 | Tumor_G2 |
| 13810 | NDUFB2   | 7.37451723  | Tumor_G2 |
| 13811 | NDUFB3   | 6.654524134 | Tumor_G2 |
| 13812 | NDUFB7   | 8.924098996 | Tumor_G2 |
| 13813 | CYC1     | 6.911763362 | Tumor_G2 |
| 13814 | ETFB     | 5.218653816 | Tumor_G2 |
| 13815 | UQCR10   | 7.2838684   | Tumor_G2 |
| 13816 | UQCRQ    | 7.785085935 | Tumor_G2 |
| 13817 | UQCC3    | 4.63648215  | Tumor_G2 |
| 13818 | COX15    | 4.841126867 | Tumor_G2 |
| 13819 | COX5A    | 7.39866344  | Tumor_G2 |
| 13820 | COX6B1   | 8.898201857 | Tumor_G2 |
| 13821 | COX6C    | 6.695024875 | Tumor_G2 |
| 13822 | COX7A2   | 7.031413929 | Tumor_G2 |
| 13823 | COX7B    | 6.26189432  | Tumor_G2 |
| 13824 | COX8A    | 9.874100977 | Tumor_G2 |
| 13825 | SCO1     | 3.61191367  | Tumor_G2 |
| 13826 | SURF1    | 6.976670319 | Tumor_G2 |
| 13827 | ATP6V1E1 | 5.954950148 | Tumor_G2 |
| 13828 | DLAT     | 5.110618924 | Tumor_G2 |
| 13829 | PDC      | 0.154072202 | Tumor_G2 |
| 13830 | SUCLG2   | 6.30638424  | Tumor_G2 |
| 13831 | SLC25A5  | 8.051658319 | Tumor_G2 |
| 13832 | UCP2     | 8.271733146 | Tumor_G2 |
| 13833 | SOD2     | 4.831471041 | Tumor_G2 |
| 13834 | NOX4     | 1.224551807 | Tumor_G2 |
| 13835 | DUOX1    | 7.051397513 | Tumor_G2 |
| 13836 | DUOXA1   | 6.638971248 | Tumor_G2 |
| 13837 | DUOX2    | 9.860735892 | Tumor_G2 |
| 13838 | DUOXA2   | 8.320068089 | Tumor_G2 |

|       |          |             |          |
|-------|----------|-------------|----------|
| 13839 | NDUFA1   | 8.312889014 | Tumor_G2 |
| 13840 | NDUFA2   | 6.87741714  | Tumor_G2 |
| 13841 | NDUFA8   | 7.286117902 | Tumor_G2 |
| 13842 | NDUFB1   | 5.922582697 | Tumor_G2 |
| 13843 | NDUFB10  | 7.581747491 | Tumor_G2 |
| 13844 | NDUFB2   | 6.846932762 | Tumor_G2 |
| 13845 | NDUFB3   | 6.453818339 | Tumor_G2 |
| 13846 | NDUFB7   | 8.722098111 | Tumor_G2 |
| 13847 | CYC1     | 6.87259919  | Tumor_G2 |
| 13848 | ETFB     | 4.817734076 | Tumor_G2 |
| 13849 | UQCR10   | 7.775866423 | Tumor_G2 |
| 13850 | UQCRQ    | 7.350523758 | Tumor_G2 |
| 13851 | UQCC3    | 4.730018431 | Tumor_G2 |
| 13852 | COX15    | 4.859330293 | Tumor_G2 |
| 13853 | COX5A    | 7.336485721 | Tumor_G2 |
| 13854 | COX6B1   | 8.956631761 | Tumor_G2 |
| 13855 | COX6C    | 6.428602292 | Tumor_G2 |
| 13856 | COX7A2   | 7.071437909 | Tumor_G2 |
| 13857 | COX7B    | 6.233747008 | Tumor_G2 |
| 13858 | COX8A    | 9.504878164 | Tumor_G2 |
| 13859 | SCO1     | 3.522317515 | Tumor_G2 |
| 13860 | SURF1    | 6.759418562 | Tumor_G2 |
| 13861 | ATP6V1E1 | 7.054988738 | Tumor_G2 |
| 13862 | DLAT     | 4.982675077 | Tumor_G2 |
| 13863 | PDC      | 0           | Tumor_G2 |
| 13864 | SUCLG2   | 5.996252075 | Tumor_G2 |
| 13865 | SLC25A5  | 7.922778193 | Tumor_G2 |
| 13866 | UCP2     | 8.451692829 | Tumor_G2 |
| 13867 | SOD2     | 5.34669344  | Tumor_G2 |
| 13868 | NOX4     | 2.810011877 | Tumor_G2 |
| 13869 | DUOX1    | 5.703440298 | Tumor_G2 |
| 13870 | DUOXA1   | 6.309908041 | Tumor_G2 |
| 13871 | DUOX2    | 5.945280283 | Tumor_G2 |
| 13872 | DUOXA2   | 4.347947368 | Tumor_G2 |
| 13873 | NDUFA1   | 8.432925673 | Tumor_G2 |
| 13874 | NDUFA2   | 7.035921161 | Tumor_G2 |
| 13875 | NDUFA8   | 7.449540428 | Tumor_G2 |
| 13876 | NDUFB1   | 6.069461565 | Tumor_G2 |
| 13877 | NDUFB10  | 7.532415112 | Tumor_G2 |
| 13878 | NDUFB2   | 7.334958318 | Tumor_G2 |

|       |          |             |          |
|-------|----------|-------------|----------|
| 13879 | NDUFB3   | 6.807071834 | Tumor_G2 |
| 13880 | NDUFB7   | 8.915042236 | Tumor_G2 |
| 13881 | CYC1     | 7.401632595 | Tumor_G2 |
| 13882 | ETFB     | 5.373197311 | Tumor_G2 |
| 13883 | UQCR10   | 7.779455842 | Tumor_G2 |
| 13884 | UQCRQ    | 7.465915327 | Tumor_G2 |
| 13885 | UQCC3    | 4.390705955 | Tumor_G2 |
| 13886 | COX15    | 5.16528205  | Tumor_G2 |
| 13887 | COX5A    | 7.38300716  | Tumor_G2 |
| 13888 | COX6B1   | 8.93179593  | Tumor_G2 |
| 13889 | COX6C    | 6.92393614  | Tumor_G2 |
| 13890 | COX7A2   | 7.358454374 | Tumor_G2 |
| 13891 | COX7B    | 6.663561874 | Tumor_G2 |
| 13892 | COX8A    | 9.92430054  | Tumor_G2 |
| 13893 | SCO1     | 3.688958962 | Tumor_G2 |
| 13894 | SURF1    | 6.872948919 | Tumor_G2 |
| 13895 | ATP6V1E1 | 6.827977975 | Tumor_G2 |
| 13896 | DLAT     | 5.372419285 | Tumor_G2 |
| 13897 | PDC      | 0.164962563 | Tumor_G2 |
| 13898 | SUCLG2   | 6.639829193 | Tumor_G2 |
| 13899 | SLC25A5  | 8.540179676 | Tumor_G2 |
| 13900 | UCP2     | 7.40229053  | Tumor_G2 |
| 13901 | SOD2     | 4.732108194 | Tumor_G2 |
| 13902 | NOX4     | 1.371620866 | Tumor_G2 |
| 13903 | DUOX1    | 6.439584017 | Tumor_G2 |
| 13904 | DUOXA1   | 6.35715967  | Tumor_G2 |
| 13905 | DUOX2    | 6.786158573 | Tumor_G2 |
| 13906 | DUOXA2   | 5.436903979 | Tumor_G2 |
| 13907 | NDUFA1   | 8.586133116 | Tumor_G2 |
| 13908 | NDUFA2   | 7.00317878  | Tumor_G2 |
| 13909 | NDUFA8   | 7.692899358 | Tumor_G2 |
| 13910 | NDUFB1   | 6.288406134 | Tumor_G2 |
| 13911 | NDUFB10  | 7.700637393 | Tumor_G2 |
| 13912 | NDUFB2   | 7.134663706 | Tumor_G2 |
| 13913 | NDUFB3   | 6.868811218 | Tumor_G2 |
| 13914 | NDUFB7   | 8.938913628 | Tumor_G2 |
| 13915 | CYC1     | 7.7140069   | Tumor_G2 |
| 13916 | ETFB     | 4.692187222 | Tumor_G2 |
| 13917 | UQCR10   | 7.917690467 | Tumor_G2 |
| 13918 | UQCRQ    | 7.745025924 | Tumor_G2 |

|       |          |             |          |
|-------|----------|-------------|----------|
| 13919 | UQCC3    | 4.866440436 | Tumor_G2 |
| 13920 | COX15    | 4.728541162 | Tumor_G2 |
| 13921 | COX5A    | 7.998851765 | Tumor_G2 |
| 13922 | COX6B1   | 9.193247039 | Tumor_G2 |
| 13923 | COX6C    | 6.991921068 | Tumor_G2 |
| 13924 | COX7A2   | 7.448592824 | Tumor_G2 |
| 13925 | COX7B    | 7.059393027 | Tumor_G2 |
| 13926 | COX8A    | 9.894495393 | Tumor_G2 |
| 13927 | SCO1     | 3.739253277 | Tumor_G2 |
| 13928 | SURF1    | 6.539445211 | Tumor_G2 |
| 13929 | ATP6V1E1 | 7.316832275 | Tumor_G2 |
| 13930 | DLAT     | 5.238900186 | Tumor_G2 |
| 13931 | PDC      | 0           | Tumor_G2 |
| 13932 | SUCLG2   | 6.468681391 | Tumor_G2 |
| 13933 | SLC25A5  | 9.044123326 | Tumor_G2 |
| 13934 | UCP2     | 5.583617152 | Tumor_G2 |
| 13935 | SOD2     | 4.686933441 | Tumor_G2 |
| 13936 | NOX4     | 1.164885669 | Tumor_G2 |
| 13937 | DUOX1    | 5.369407971 | Tumor_G2 |
| 13938 | DUOXA1   | 6.037553736 | Tumor_G2 |
| 13939 | DUOX2    | 5.682647006 | Tumor_G2 |
| 13940 | DUOXA2   | 4.376118618 | Tumor_G2 |
| 13941 | NDUFA1   | 8.039819307 | Tumor_G2 |
| 13942 | NDUFA2   | 6.994822989 | Tumor_G2 |
| 13943 | NDUFA8   | 7.351629971 | Tumor_G2 |
| 13944 | NDUFB1   | 5.97129525  | Tumor_G2 |
| 13945 | NDUFB10  | 7.675879854 | Tumor_G2 |
| 13946 | NDUFB2   | 6.729840391 | Tumor_G2 |
| 13947 | NDUFB3   | 6.60934193  | Tumor_G2 |
| 13948 | NDUFB7   | 8.962468246 | Tumor_G2 |
| 13949 | CYC1     | 7.137885501 | Tumor_G2 |
| 13950 | ETFB     | 5.700016231 | Tumor_G2 |
| 13951 | UQCR10   | 7.862406754 | Tumor_G2 |
| 13952 | UQCRQ    | 7.522831653 | Tumor_G2 |
| 13953 | UQCC3    | 5.036103591 | Tumor_G2 |
| 13954 | COX15    | 5.003895664 | Tumor_G2 |
| 13955 | COX5A    | 7.098662417 | Tumor_G2 |
| 13956 | COX6B1   | 8.871373423 | Tumor_G2 |
| 13957 | COX6C    | 6.845528936 | Tumor_G2 |
| 13958 | COX7A2   | 7.292473808 | Tumor_G2 |

|       |          |             |          |
|-------|----------|-------------|----------|
| 13959 | COX7B    | 6.234856817 | Tumor_G2 |
| 13960 | COX8A    | 9.776638854 | Tumor_G2 |
| 13961 | SCO1     | 3.406420982 | Tumor_G2 |
| 13962 | SURF1    | 6.771058966 | Tumor_G2 |
| 13963 | ATP6V1E1 | 6.909113742 | Tumor_G2 |
| 13964 | DLAT     | 4.842848945 | Tumor_G2 |
| 13965 | PDC      | 0.16539203  | Tumor_G2 |
| 13966 | SUCLG2   | 6.105007158 | Tumor_G2 |
| 13967 | SLC25A5  | 7.856845875 | Tumor_G2 |
| 13968 | UCP2     | 9.098971011 | Tumor_G2 |
| 13969 | SOD2     | 3.951143995 | Tumor_G2 |
| 13970 | NOX4     | 2.438347847 | Tumor_G2 |
| 13971 | DUOX1    | 6.604069644 | Tumor_G2 |
| 13972 | DUOXA1   | 7.057735951 | Tumor_G2 |
| 13973 | DUOX2    | 7.492217924 | Tumor_G2 |
| 13974 | DUOXA2   | 5.584929991 | Tumor_G2 |
| 13975 | NDUFA1   | 8.261751051 | Tumor_G2 |
| 13976 | NDUFA2   | 6.971778054 | Tumor_G2 |
| 13977 | NDUFA8   | 7.311511068 | Tumor_G2 |
| 13978 | NDUFB1   | 5.909650462 | Tumor_G2 |
| 13979 | NDUFB10  | 7.927639602 | Tumor_G2 |
| 13980 | NDUFB2   | 6.987948409 | Tumor_G2 |
| 13981 | NDUFB3   | 6.550450252 | Tumor_G2 |
| 13982 | NDUFB7   | 8.891549209 | Tumor_G2 |
| 13983 | CYC1     | 7.220049996 | Tumor_G2 |
| 13984 | ETFB     | 5.453933485 | Tumor_G2 |
| 13985 | UQCR10   | 7.74711328  | Tumor_G2 |
| 13986 | UQCRQ    | 7.569052339 | Tumor_G2 |
| 13987 | UQCC3    | 4.672491984 | Tumor_G2 |
| 13988 | COX15    | 4.935548069 | Tumor_G2 |
| 13989 | COX5A    | 7.449414329 | Tumor_G2 |
| 13990 | COX6B1   | 9.021713241 | Tumor_G2 |
| 13991 | COX6C    | 6.81036125  | Tumor_G2 |
| 13992 | COX7A2   | 7.21411678  | Tumor_G2 |
| 13993 | COX7B    | 6.318185118 | Tumor_G2 |
| 13994 | COX8A    | 9.824592558 | Tumor_G2 |
| 13995 | SCO1     | 3.091815964 | Tumor_G2 |
| 13996 | SURF1    | 6.870661724 | Tumor_G2 |
| 13997 | ATP6V1E1 | 7.072803368 | Tumor_G2 |
| 13998 | DLAT     | 4.717808921 | Tumor_G2 |

|       |          |             |          |
|-------|----------|-------------|----------|
| 13999 | PDC      | 0.064676574 | Tumor_G2 |
| 14000 | SUCLG2   | 5.984761979 | Tumor_G2 |
| 14001 | SLC25A5  | 7.770662745 | Tumor_G2 |
| 14002 | UCP2     | 8.974030151 | Tumor_G2 |
| 14003 | SOD2     | 4.648030038 | Tumor_G2 |
| 14004 | NOX4     | 2.622094229 | Tumor_G2 |
| 14005 | DUOX1    | 6.758507473 | Tumor_G2 |
| 14006 | DUOXA1   | 6.906604226 | Tumor_G2 |
| 14007 | DUOX2    | 7.496695164 | Tumor_G2 |
| 14008 | DUOXA2   | 6.035422598 | Tumor_G2 |
| 14009 | NDUFA1   | 8.052153231 | Tumor_G2 |
| 14010 | NDUFA2   | 6.688218262 | Tumor_G2 |
| 14011 | NDUFA8   | 7.512043427 | Tumor_G2 |
| 14012 | NDUFB1   | 5.657216148 | Tumor_G2 |
| 14013 | NDUFB10  | 7.381251708 | Tumor_G2 |
| 14014 | NDUFB2   | 6.754489312 | Tumor_G2 |
| 14015 | NDUFB3   | 6.419550053 | Tumor_G2 |
| 14016 | NDUFB7   | 8.642947515 | Tumor_G2 |
| 14017 | CYC1     | 7.013498422 | Tumor_G2 |
| 14018 | ETFB     | 5.072421216 | Tumor_G2 |
| 14019 | UQCR10   | 7.693933934 | Tumor_G2 |
| 14020 | UQCRQ    | 7.380613385 | Tumor_G2 |
| 14021 | UQCC3    | 4.259865696 | Tumor_G2 |
| 14022 | COX15    | 5.111778948 | Tumor_G2 |
| 14023 | COX5A    | 7.564022197 | Tumor_G2 |
| 14024 | COX6B1   | 8.861468363 | Tumor_G2 |
| 14025 | COX6C    | 6.691353439 | Tumor_G2 |
| 14026 | COX7A2   | 7.040652901 | Tumor_G2 |
| 14027 | COX7B    | 6.400553756 | Tumor_G2 |
| 14028 | COX8A    | 9.262607394 | Tumor_G2 |
| 14029 | SCO1     | 3.663127273 | Tumor_G2 |
| 14030 | SURF1    | 6.467119883 | Tumor_G2 |
| 14031 | ATP6V1E1 | 6.907466636 | Tumor_G2 |
| 14032 | DLAT     | 5.716035711 | Tumor_G2 |
| 14033 | PDC      | 0           | Tumor_G2 |
| 14034 | SUCLG2   | 6.24402424  | Tumor_G2 |
| 14035 | SLC25A5  | 8.604493004 | Tumor_G2 |
| 14036 | UCP2     | 9.592845317 | Tumor_G2 |
| 14037 | SOD2     | 4.789067843 | Tumor_G2 |
| 14038 | NOX4     | 2.61589316  | Tumor_G2 |

|       |          |             |          |
|-------|----------|-------------|----------|
| 14039 | DUOX1    | 6.083327088 | Tumor_G2 |
| 14040 | DUOXA1   | 6.549481801 | Tumor_G2 |
| 14041 | DUOX2    | 6.013485771 | Tumor_G2 |
| 14042 | DUOXA2   | 5.016267124 | Tumor_G2 |
| 14043 | NDUFA1   | 8.368650862 | Tumor_G2 |
| 14044 | NDUFA2   | 7.107829671 | Tumor_G2 |
| 14045 | NDUFA8   | 7.502595508 | Tumor_G2 |
| 14046 | NDUFB1   | 6.08399232  | Tumor_G2 |
| 14047 | NDUFB10  | 7.971174125 | Tumor_G2 |
| 14048 | NDUFB2   | 7.310432103 | Tumor_G2 |
| 14049 | NDUFB3   | 6.777699435 | Tumor_G2 |
| 14050 | NDUFB7   | 9.032516571 | Tumor_G2 |
| 14051 | CYC1     | 7.613399283 | Tumor_G2 |
| 14052 | ETFB     | 5.260480932 | Tumor_G2 |
| 14053 | UQCR10   | 8.067935111 | Tumor_G2 |
| 14054 | UQCRQ    | 7.693861373 | Tumor_G2 |
| 14055 | UQCC3    | 4.340666579 | Tumor_G2 |
| 14056 | COX15    | 4.774760964 | Tumor_G2 |
| 14057 | COX5A    | 7.737060009 | Tumor_G2 |
| 14058 | COX6B1   | 9.09384245  | Tumor_G2 |
| 14059 | COX6C    | 7.011805069 | Tumor_G2 |
| 14060 | COX7A2   | 7.338838088 | Tumor_G2 |
| 14061 | COX7B    | 6.726288811 | Tumor_G2 |
| 14062 | COX8A    | 10.20402334 | Tumor_G2 |
| 14063 | SCO1     | 3.280058597 | Tumor_G2 |
| 14064 | SURF1    | 6.519465963 | Tumor_G2 |
| 14065 | ATP6V1E1 | 7.375397043 | Tumor_G2 |
| 14066 | DLAT     | 4.962490636 | Tumor_G2 |
| 14067 | PDC      | 0.053446217 | Tumor_G2 |
| 14068 | SUCLG2   | 6.35847112  | Tumor_G2 |
| 14069 | SLC25A5  | 8.699365049 | Tumor_G2 |
| 14070 | UCP2     | 8.621167646 | Tumor_G2 |
| 14071 | SOD2     | 4.771477487 | Tumor_G2 |
| 14072 | NOX4     | 1.510273    | Tumor_G2 |
| 14073 | DUOX1    | 5.807042712 | Tumor_G2 |
| 14074 | DUOXA1   | 5.976909109 | Tumor_G2 |
| 14075 | DUOX2    | 6.797167869 | Tumor_G2 |
| 14076 | DUOXA2   | 5.332572191 | Tumor_G2 |
| 14077 | NDUFA1   | 7.87203082  | Tumor_G2 |
| 14078 | NDUFA2   | 6.708729782 | Tumor_G2 |



|       |          |             |          |
|-------|----------|-------------|----------|
| 14079 | NDUFA8   | 7.118847714 | Tumor_G2 |
| 14080 | NDUFB1   | 5.548291005 | Tumor_G2 |
| 14081 | NDUFB10  | 7.758744155 | Tumor_G2 |
| 14082 | NDUFB2   | 6.888848403 | Tumor_G2 |
| 14083 | NDUFB3   | 6.069826336 | Tumor_G2 |
| 14084 | NDUFB7   | 8.688669753 | Tumor_G2 |
| 14085 | CYC1     | 7.200427555 | Tumor_G2 |
| 14086 | ETFB     | 4.810162259 | Tumor_G2 |
| 14087 | UQCR10   | 7.495990188 | Tumor_G2 |
| 14088 | UQCRQ    | 7.248490139 | Tumor_G2 |
| 14089 | UQCC3    | 4.668020394 | Tumor_G2 |
| 14090 | COX15    | 4.892870245 | Tumor_G2 |
| 14091 | COX5A    | 7.382273476 | Tumor_G2 |
| 14092 | COX6B1   | 8.670478866 | Tumor_G2 |
| 14093 | COX6C    | 6.413693128 | Tumor_G2 |
| 14094 | COX7A2   | 7.002352499 | Tumor_G2 |
| 14095 | COX7B    | 6.068271313 | Tumor_G2 |
| 14096 | COX8A    | 9.601165677 | Tumor_G2 |
| 14097 | SCO1     | 3.338677333 | Tumor_G2 |
| 14098 | SURF1    | 6.340999804 | Tumor_G2 |
| 14099 | ATP6V1E1 | 7.306979099 | Tumor_G2 |
| 14100 | DLAT     | 5.243254358 | Tumor_G2 |
| 14101 | PDC      | 0           | Tumor_G2 |
| 14102 | SUCLG2   | 6.447720961 | Tumor_G2 |
| 14103 | SLC25A5  | 8.749929421 | Tumor_G2 |
| 14104 | UCP2     | 7.361292019 | Tumor_G2 |
| 14105 | SOD2     | 4.594884393 | Tumor_G2 |
| 14106 | NOX4     | 1.312107917 | Tumor_G2 |
| 14107 | DUOX1    | 6.317960302 | Tumor_G2 |
| 14108 | DUOXA1   | 6.313497921 | Tumor_G2 |
| 14109 | DUOX2    | 6.028678957 | Tumor_G2 |
| 14110 | DUOXA2   | 3.966028902 | Tumor_G2 |
| 14111 | NDUFA1   | 7.983820074 | Tumor_G2 |
| 14112 | NDUFA2   | 7.042004212 | Tumor_G2 |
| 14113 | NDUFA8   | 7.271361786 | Tumor_G2 |
| 14114 | NDUFB1   | 5.850094135 | Tumor_G2 |
| 14115 | NDUFB10  | 7.893612193 | Tumor_G2 |
| 14116 | NDUFB2   | 6.416565743 | Tumor_G2 |
| 14117 | NDUFB3   | 6.019570121 | Tumor_G2 |
| 14118 | NDUFB7   | 8.898130473 | Tumor_G2 |

|       |          |             |          |
|-------|----------|-------------|----------|
| 14119 | CYC1     | 6.752971784 | Tumor_G2 |
| 14120 | ETFB     | 5.262888225 | Tumor_G2 |
| 14121 | UQCR10   | 7.754158723 | Tumor_G2 |
| 14122 | UQCRQ    | 7.462775096 | Tumor_G2 |
| 14123 | UQCC3    | 4.588204388 | Tumor_G2 |
| 14124 | COX15    | 4.297189519 | Tumor_G2 |
| 14125 | COX5A    | 7.173541105 | Tumor_G2 |
| 14126 | COX6B1   | 9.039088925 | Tumor_G2 |
| 14127 | COX6C    | 6.469387679 | Tumor_G2 |
| 14128 | COX7A2   | 6.885093309 | Tumor_G2 |
| 14129 | COX7B    | 6.232598061 | Tumor_G2 |
| 14130 | COX8A    | 9.377225864 | Tumor_G2 |
| 14131 | SCO1     | 2.755208412 | Tumor_G2 |
| 14132 | SURF1    | 6.516888252 | Tumor_G2 |
| 14133 | ATP6V1E1 | 6.864199782 | Tumor_G2 |
| 14134 | DLAT     | 4.41891081  | Tumor_G2 |
| 14135 | PDC      | 0           | Tumor_G2 |
| 14136 | SUCLG2   | 5.43402809  | Tumor_G2 |
| 14137 | SLC25A5  | 6.984002243 | Tumor_G2 |
| 14138 | UCP2     | 9.592582298 | Tumor_G2 |
| 14139 | SOD2     | 4.223862589 | Tumor_G2 |
| 14140 | NOX4     | 2.300213412 | Tumor_G2 |
| 14141 | DUOX1    | 6.542608589 | Tumor_G2 |
| 14142 | DUOXA1   | 6.962927921 | Tumor_G2 |
| 14143 | DUOX2    | 7.161631746 | Tumor_G2 |
| 14144 | DUOXA2   | 5.729670487 | Tumor_G2 |
| 14145 | NDUFA1   | 8.316238175 | Tumor_G2 |
| 14146 | NDUFA2   | 7.149496775 | Tumor_G2 |
| 14147 | NDUFA8   | 7.342370053 | Tumor_G2 |
| 14148 | NDUFB1   | 6.103309582 | Tumor_G2 |
| 14149 | NDUFB10  | 8.061012689 | Tumor_G2 |
| 14150 | NDUFB2   | 6.589526804 | Tumor_G2 |
| 14151 | NDUFB3   | 6.513783595 | Tumor_G2 |
| 14152 | NDUFB7   | 9.109341887 | Tumor_G2 |
| 14153 | CYC1     | 6.990804638 | Tumor_G2 |
| 14154 | ETFB     | 5.609000717 | Tumor_G2 |
| 14155 | UQCR10   | 7.586715603 | Tumor_G2 |
| 14156 | UQCRQ    | 7.765752392 | Tumor_G2 |
| 14157 | UQCC3    | 4.960935015 | Tumor_G2 |
| 14158 | COX15    | 4.774945862 | Tumor_G2 |

|       |          |             |          |
|-------|----------|-------------|----------|
| 14159 | COX5A    | 7.076830533 | Tumor_G2 |
| 14160 | COX6B1   | 8.979467928 | Tumor_G2 |
| 14161 | COX6C    | 6.790648985 | Tumor_G2 |
| 14162 | COX7A2   | 6.938151804 | Tumor_G2 |
| 14163 | COX7B    | 6.170074521 | Tumor_G2 |
| 14164 | COX8A    | 9.683976257 | Tumor_G2 |
| 14165 | SCO1     | 3.212956144 | Tumor_G2 |
| 14166 | SURF1    | 6.771506743 | Tumor_G2 |
| 14167 | ATP6V1E1 | 6.401200806 | Tumor_G2 |
| 14168 | DLAT     | 4.830506656 | Tumor_G2 |
| 14169 | PDC      | 0           | Tumor_G2 |
| 14170 | SUCLG2   | 5.938031876 | Tumor_G2 |
| 14171 | SLC25A5  | 7.503000626 | Tumor_G2 |
| 14172 | UCP2     | 8.448959291 | Tumor_G2 |
| 14173 | SOD2     | 4.670913779 | Tumor_G2 |
| 14174 | NOX4     | 2.265830269 | Tumor_G2 |
| 14175 | DUOX1    | 6.986773864 | Tumor_G2 |
| 14176 | DUOXA1   | 7.369576889 | Tumor_G2 |
| 14177 | DUOX2    | 7.884750808 | Tumor_G2 |
| 14178 | DUOXA2   | 5.655855911 | Tumor_G2 |
| 14179 | NDUFA1   | 7.879259492 | Tumor_G2 |
| 14180 | NDUFA2   | 6.753749882 | Tumor_G2 |
| 14181 | NDUFA8   | 6.962692457 | Tumor_G2 |
| 14182 | NDUFB1   | 5.730952049 | Tumor_G2 |
| 14183 | NDUFB10  | 7.538922081 | Tumor_G2 |
| 14184 | NDUFB2   | 6.650214509 | Tumor_G2 |
| 14185 | NDUFB3   | 6.079534352 | Tumor_G2 |
| 14186 | NDUFB7   | 8.702936052 | Tumor_G2 |
| 14187 | CYC1     | 6.739259771 | Tumor_G2 |
| 14188 | ETFB     | 5.136122886 | Tumor_G2 |
| 14189 | UQCR10   | 7.560566375 | Tumor_G2 |
| 14190 | UQCRQ    | 7.238424867 | Tumor_G2 |
| 14191 | UQCC3    | 4.415369296 | Tumor_G2 |
| 14192 | COX15    | 4.725380269 | Tumor_G2 |
| 14193 | COX5A    | 6.957224496 | Tumor_G2 |
| 14194 | COX6B1   | 8.820843985 | Tumor_G2 |
| 14195 | COX6C    | 6.364281117 | Tumor_G2 |
| 14196 | COX7A2   | 6.644492761 | Tumor_G2 |
| 14197 | COX7B    | 5.87069604  | Tumor_G2 |
| 14198 | COX8A    | 9.30894998  | Tumor_G2 |

|       |          |             |          |
|-------|----------|-------------|----------|
| 14199 | SCO1     | 3.003758716 | Tumor_G2 |
| 14200 | SURF1    | 6.759031835 | Tumor_G2 |
| 14201 | ATP6V1E1 | 6.929163036 | Tumor_G2 |
| 14202 | DLAT     | 4.633683045 | Tumor_G2 |
| 14203 | PDC      | 0           | Tumor_G2 |
| 14204 | SUCLG2   | 5.924492274 | Tumor_G2 |
| 14205 | SLC25A5  | 7.765289023 | Tumor_G2 |
| 14206 | UCP2     | 8.165393564 | Tumor_G2 |
| 14207 | SOD2     | 5.187616761 | Tumor_G2 |
| 14208 | NOX4     | 2.576799549 | Tumor_G2 |
| 14209 | DUOX1    | 6.329485338 | Tumor_G2 |
| 14210 | DUOXA1   | 6.554174811 | Tumor_G2 |
| 14211 | DUOX2    | 6.460620852 | Tumor_G2 |
| 14212 | DUOXA2   | 4.977939222 | Tumor_G2 |
| 14213 | NDUFA1   | 8.001355738 | Tumor_G2 |
| 14214 | NDUFA2   | 6.879416196 | Tumor_G2 |
| 14215 | NDUFA8   | 7.15310959  | Tumor_G2 |
| 14216 | NDUFB1   | 5.792779219 | Tumor_G2 |
| 14217 | NDUFB10  | 7.897449676 | Tumor_G2 |
| 14218 | NDUFB2   | 6.473057073 | Tumor_G2 |
| 14219 | NDUFB3   | 6.274084779 | Tumor_G2 |
| 14220 | NDUFB7   | 8.978995104 | Tumor_G2 |
| 14221 | CYC1     | 7.139577522 | Tumor_G2 |
| 14222 | ETFB     | 5.708644825 | Tumor_G2 |
| 14223 | UQCR10   | 7.862867401 | Tumor_G2 |
| 14224 | UQCRQ    | 7.335189107 | Tumor_G2 |
| 14225 | UQCC3    | 4.904249871 | Tumor_G2 |
| 14226 | COX15    | 5.026125739 | Tumor_G2 |
| 14227 | COX5A    | 7.124787138 | Tumor_G2 |
| 14228 | COX6B1   | 8.866931867 | Tumor_G2 |
| 14229 | COX6C    | 6.399085365 | Tumor_G2 |
| 14230 | COX7A2   | 6.909836521 | Tumor_G2 |
| 14231 | COX7B    | 5.772393605 | Tumor_G2 |
| 14232 | COX8A    | 9.870686172 | Tumor_G2 |
| 14233 | SCO1     | 3.27720916  | Tumor_G2 |
| 14234 | SURF1    | 6.801945616 | Tumor_G2 |
| 14235 | ATP6V1E1 | 7.073907533 | Tumor_G2 |
| 14236 | DLAT     | 4.762730758 | Tumor_G2 |
| 14237 | PDC      | 0.074584696 | Tumor_G2 |
| 14238 | SUCLG2   | 5.958935461 | Tumor_G2 |

|       |          |             |          |
|-------|----------|-------------|----------|
| 14239 | SLC25A5  | 7.705849199 | Tumor_G2 |
| 14240 | UCP2     | 8.991832106 | Tumor_G2 |
| 14241 | SOD2     | 4.876228996 | Tumor_G2 |
| 14242 | NOX4     | 2.945084838 | Tumor_G2 |
| 14243 | DUOX1    | 7.123681111 | Tumor_G2 |
| 14244 | DUOXA1   | 7.349597268 | Tumor_G2 |
| 14245 | DUOX2    | 7.520958193 | Tumor_G2 |
| 14246 | DUOXA2   | 6.077630098 | Tumor_G2 |
| 14247 | NDUFA1   | 8.240627187 | Tumor_G2 |
| 14248 | NDUFA2   | 6.974517346 | Tumor_G2 |
| 14249 | NDUFA8   | 7.245555558 | Tumor_G2 |
| 14250 | NDUFB1   | 5.978435409 | Tumor_G2 |
| 14251 | NDUFB10  | 8.043945535 | Tumor_G2 |
| 14252 | NDUFB2   | 6.946792891 | Tumor_G2 |
| 14253 | NDUFB3   | 6.354912688 | Tumor_G2 |
| 14254 | NDUFB7   | 9.276748411 | Tumor_G2 |
| 14255 | CYC1     | 7.12452563  | Tumor_G2 |
| 14256 | ETFB     | 5.966141926 | Tumor_G2 |
| 14257 | UQCR10   | 7.98249623  | Tumor_G2 |
| 14258 | UQCRQ    | 7.410652916 | Tumor_G2 |
| 14259 | UQCC3    | 5.017382106 | Tumor_G2 |
| 14260 | COX15    | 5.066410989 | Tumor_G2 |
| 14261 | COX5A    | 7.096290446 | Tumor_G2 |
| 14262 | COX6B1   | 9.087697637 | Tumor_G2 |
| 14263 | COX6C    | 6.591380444 | Tumor_G2 |
| 14264 | COX7A2   | 7.091082663 | Tumor_G2 |
| 14265 | COX7B    | 6.047728893 | Tumor_G2 |
| 14266 | COX8A    | 10.00675168 | Tumor_G2 |
| 14267 | SCO1     | 3.226234305 | Tumor_G2 |
| 14268 | SURF1    | 6.908448683 | Tumor_G2 |
| 14269 | ATP6V1E1 | 7.20132295  | Tumor_G2 |
| 14270 | DLAT     | 4.612211402 | Tumor_G2 |
| 14271 | PDC      | 0.238638961 | Tumor_G2 |
| 14272 | SUCLG2   | 5.873868249 | Tumor_G2 |
| 14273 | SLC25A5  | 7.391928863 | Tumor_G2 |
| 14274 | UCP2     | 9.387257076 | Tumor_G2 |
| 14275 | SOD2     | 4.027381369 | Tumor_G2 |
| 14276 | NOX4     | 1.509509074 | Tumor_G2 |
| 14277 | DUOX1    | 7.005277842 | Tumor_G2 |
| 14278 | DUOXA1   | 7.08687482  | Tumor_G2 |

|       |          |             |          |
|-------|----------|-------------|----------|
| 14279 | DUOX2    | 7.673500016 | Tumor_G2 |
| 14280 | DUOXA2   | 6.186147335 | Tumor_G2 |
| 14281 | NDUFA1   | 7.521066273 | Tumor_G2 |
| 14282 | NDUFA2   | 6.42067019  | Tumor_G2 |
| 14283 | NDUFA8   | 7.070989439 | Tumor_G2 |
| 14284 | NDUFB1   | 5.367127685 | Tumor_G2 |
| 14285 | NDUFB10  | 7.381541731 | Tumor_G2 |
| 14286 | NDUFB2   | 6.263757948 | Tumor_G2 |
| 14287 | NDUFB3   | 6.092808934 | Tumor_G2 |
| 14288 | NDUFB7   | 8.588574092 | Tumor_G2 |
| 14289 | CYC1     | 6.682808213 | Tumor_G2 |
| 14290 | ETFB     | 4.948388597 | Tumor_G2 |
| 14291 | UQCR10   | 7.575151645 | Tumor_G2 |
| 14292 | UQCRQ    | 7.102132068 | Tumor_G2 |
| 14293 | UQCC3    | 4.35145316  | Tumor_G2 |
| 14294 | COX15    | 4.779006811 | Tumor_G2 |
| 14295 | COX5A    | 7.124786529 | Tumor_G2 |
| 14296 | COX6B1   | 8.538515437 | Tumor_G2 |
| 14297 | COX6C    | 6.322355773 | Tumor_G2 |
| 14298 | COX7A2   | 6.852154223 | Tumor_G2 |
| 14299 | COX7B    | 5.894026176 | Tumor_G2 |
| 14300 | COX8A    | 9.340001726 | Tumor_G2 |
| 14301 | SCO1     | 3.49130813  | Tumor_G2 |
| 14302 | SURF1    | 6.583957646 | Tumor_G2 |
| 14303 | ATP6V1E1 | 7.127802263 | Tumor_G2 |
| 14304 | DLAT     | 5.228671051 | Tumor_G2 |
| 14305 | PDC      | 0.268163827 | Tumor_G2 |
| 14306 | SUCLG2   | 6.474672322 | Tumor_G2 |
| 14307 | SLC25A5  | 7.489460484 | Tumor_G2 |
| 14308 | UCP2     | 10.14170622 | Tumor_G2 |
| 14309 | SOD2     | 4.673628008 | Tumor_G2 |
| 14310 | NOX4     | 2.835543308 | Tumor_G2 |
| 14311 | DUOX1    | 6.777164225 | Tumor_G2 |
| 14312 | DUOXA1   | 7.260846764 | Tumor_G2 |
| 14313 | DUOX2    | 8.326855705 | Tumor_G2 |
| 14314 | DUOXA2   | 5.65697994  | Tumor_G2 |
| 14315 | NDUFA1   | 7.744418292 | Tumor_G2 |
| 14316 | NDUFA2   | 6.621815904 | Tumor_G2 |
| 14317 | NDUFA8   | 7.18450371  | Tumor_G2 |
| 14318 | NDUFB1   | 5.740832938 | Tumor_G2 |

|       |          |             |          |
|-------|----------|-------------|----------|
| 14319 | NDUFB10  | 7.60727646  | Tumor_G2 |
| 14320 | NDUFB2   | 6.161935099 | Tumor_G2 |
| 14321 | NDUFB3   | 6.06791302  | Tumor_G2 |
| 14322 | NDUFB7   | 8.648329265 | Tumor_G2 |
| 14323 | CYC1     | 6.703572213 | Tumor_G2 |
| 14324 | ETFB     | 5.258338146 | Tumor_G2 |
| 14325 | UQCR10   | 7.602189441 | Tumor_G2 |
| 14326 | UQCRQ    | 7.198320685 | Tumor_G2 |
| 14327 | UQCC3    | 4.406007244 | Tumor_G2 |
| 14328 | COX15    | 4.788002773 | Tumor_G2 |
| 14329 | COX5A    | 6.882007164 | Tumor_G2 |
| 14330 | COX6B1   | 8.632533942 | Tumor_G2 |
| 14331 | COX6C    | 6.504528582 | Tumor_G2 |
| 14332 | COX7A2   | 6.735479025 | Tumor_G2 |
| 14333 | COX7B    | 5.927340121 | Tumor_G2 |
| 14334 | COX8A    | 9.339919022 | Tumor_G2 |
| 14335 | SCO1     | 3.21537555  | Tumor_G2 |
| 14336 | SURF1    | 6.559633061 | Tumor_G2 |
| 14337 | ATP6V1E1 | 6.955076236 | Tumor_G2 |
| 14338 | DLAT     | 4.799734324 | Tumor_G2 |
| 14339 | PDC      | 0.530254869 | Tumor_G2 |
| 14340 | SUCLG2   | 6.133547188 | Tumor_G2 |
| 14341 | SLC25A5  | 7.184054263 | Tumor_G2 |
| 14342 | UCP2     | 9.62133139  | Tumor_G2 |
| 14343 | SOD2     | 4.113945944 | Tumor_G2 |
| 14344 | NOX4     | 1.961423367 | Tumor_G2 |
| 14345 | DUOX1    | 6.862108408 | Tumor_G2 |
| 14346 | DUOXA1   | 7.012372907 | Tumor_G2 |
| 14347 | DUOX2    | 7.942783168 | Tumor_G2 |
| 14348 | DUOXA2   | 5.321698227 | Tumor_G2 |
| 14349 | NDUFA1   | 8.524672152 | Tumor_G2 |
| 14350 | NDUFA2   | 6.98872705  | Tumor_G2 |
| 14351 | NDUFA8   | 7.402001838 | Tumor_G2 |
| 14352 | NDUFB1   | 6.172361523 | Tumor_G2 |
| 14353 | NDUFB10  | 7.755347238 | Tumor_G2 |
| 14354 | NDUFB2   | 7.256801526 | Tumor_G2 |
| 14355 | NDUFB3   | 6.661090207 | Tumor_G2 |
| 14356 | NDUFB7   | 8.957118968 | Tumor_G2 |
| 14357 | CYC1     | 7.047755839 | Tumor_G2 |
| 14358 | ETFB     | 5.644951763 | Tumor_G2 |

|       |          |             |          |
|-------|----------|-------------|----------|
| 14359 | UQCR10   | 7.106823555 | Tumor_G2 |
| 14360 | UQCRQ    | 7.686528756 | Tumor_G2 |
| 14361 | UQCC3    | 4.602387711 | Tumor_G2 |
| 14362 | COX15    | 5.241499784 | Tumor_G2 |
| 14363 | COX5A    | 7.296171588 | Tumor_G2 |
| 14364 | COX6B1   | 8.714872641 | Tumor_G2 |
| 14365 | COX6C    | 6.750807605 | Tumor_G2 |
| 14366 | COX7A2   | 7.114769286 | Tumor_G2 |
| 14367 | COX7B    | 6.31786413  | Tumor_G2 |
| 14368 | COX8A    | 10.08287101 | Tumor_G2 |
| 14369 | SCO1     | 3.765318472 | Tumor_G2 |
| 14370 | SURF1    | 7.123199666 | Tumor_G2 |
| 14371 | ATP6V1E1 | 7.436294005 | Tumor_G2 |
| 14372 | DLAT     | 5.243760703 | Tumor_G2 |
| 14373 | PDC      | 0.372717672 | Tumor_G2 |
| 14374 | SUCLG2   | 6.633222716 | Tumor_G2 |
| 14375 | SLC25A5  | 8.304632072 | Tumor_G2 |
| 14376 | UCP2     | 8.116668125 | Tumor_G2 |
| 14377 | SOD2     | 4.378049555 | Tumor_G2 |
| 14378 | NOX4     | 1.08199268  | Tumor_G2 |
| 14379 | DUOX1    | 8.011436715 | Tumor_G2 |
| 14380 | DUOXA1   | 7.782936685 | Tumor_G2 |
| 14381 | DUOX2    | 10.23348118 | Tumor_G2 |
| 14382 | DUOXA2   | 7.691985358 | Tumor_G2 |
| 14383 | NDUFA1   | 9.898541883 | Tumor_G3 |
| 14384 | NDUFA2   | 8.292576226 | Tumor_G3 |
| 14385 | NDUFA8   | 7.736217241 | Tumor_G3 |
| 14386 | NDUFB1   | 7.43999063  | Tumor_G3 |
| 14387 | NDUFB10  | 8.131394793 | Tumor_G3 |
| 14388 | NDUFB2   | 6.552561223 | Tumor_G3 |
| 14389 | NDUFB3   | 5.860393187 | Tumor_G3 |
| 14390 | NDUFB7   | 9.930699625 | Tumor_G3 |
| 14391 | CYC1     | 6.51165398  | Tumor_G3 |
| 14392 | ETFB     | 5.371225214 | Tumor_G3 |
| 14393 | UQCR10   | 8.575467693 | Tumor_G3 |
| 14394 | UQCRQ    | 8.178275654 | Tumor_G3 |
| 14395 | UQCC3    | 5.257566388 | Tumor_G3 |
| 14396 | COX15    | 3.82922538  | Tumor_G3 |
| 14397 | COX5A    | 6.992266403 | Tumor_G3 |
| 14398 | COX6B1   | 10.08362297 | Tumor_G3 |



|       |          |             |          |
|-------|----------|-------------|----------|
| 14399 | COX6C    | 7.571331862 | Tumor_G3 |
| 14400 | COX7A2   | 7.179447486 | Tumor_G3 |
| 14401 | COX7B    | 6.785771427 | Tumor_G3 |
| 14402 | COX8A    | 9.865157919 | Tumor_G3 |
| 14403 | SCO1     | 1.752365128 | Tumor_G3 |
| 14404 | SURF1    | 6.951967559 | Tumor_G3 |
| 14405 | ATP6V1E1 | 6.007590059 | Tumor_G3 |
| 14406 | DLAT     | 3.788322852 | Tumor_G3 |
| 14407 | PDC      | 0.179023048 | Tumor_G3 |
| 14408 | SUCLG2   | 4.931339433 | Tumor_G3 |
| 14409 | SLC25A5  | 5.949447018 | Tumor_G3 |
| 14410 | UCP2     | 7.394772359 | Tumor_G3 |
| 14411 | SOD2     | 3.558399108 | Tumor_G3 |
| 14412 | NOX4     | 1.000852954 | Tumor_G3 |
| 14413 | DUOX1    | 7.797291746 | Tumor_G3 |
| 14414 | DUOXA1   | 7.701750318 | Tumor_G3 |
| 14415 | DUOX2    | 7.960352253 | Tumor_G3 |
| 14416 | DUOXA2   | 6.568705799 | Tumor_G3 |
| 14417 | NDUFA1   | 9.087534411 | Tumor_G3 |
| 14418 | NDUFA2   | 7.369122621 | Tumor_G3 |
| 14419 | NDUFA8   | 7.885635559 | Tumor_G3 |
| 14420 | NDUFB1   | 6.33571518  | Tumor_G3 |
| 14421 | NDUFB10  | 8.064150881 | Tumor_G3 |
| 14422 | NDUFB2   | 7.099928017 | Tumor_G3 |
| 14423 | NDUFB3   | 6.98698306  | Tumor_G3 |
| 14424 | NDUFB7   | 8.811912393 | Tumor_G3 |
| 14425 | CYC1     | 8.005481775 | Tumor_G3 |
| 14426 | ETFB     | 6.485638038 | Tumor_G3 |
| 14427 | UQCR10   | 8.665016775 | Tumor_G3 |
| 14428 | UQCRQ    | 8.075433235 | Tumor_G3 |
| 14429 | UQCC3    | 4.770087013 | Tumor_G3 |
| 14430 | COX15    | 5.264275104 | Tumor_G3 |
| 14431 | COX5A    | 8.36665742  | Tumor_G3 |
| 14432 | COX6B1   | 9.332859294 | Tumor_G3 |
| 14433 | COX6C    | 7.586764509 | Tumor_G3 |
| 14434 | COX7A2   | 7.528878264 | Tumor_G3 |
| 14435 | COX7B    | 7.351953533 | Tumor_G3 |
| 14436 | COX8A    | 10.33588497 | Tumor_G3 |
| 14437 | SCO1     | 4.025404685 | Tumor_G3 |
| 14438 | SURF1    | 6.690208413 | Tumor_G3 |

|       |          |             |          |
|-------|----------|-------------|----------|
| 14439 | ATP6V1E1 | 6.966236063 | Tumor_G3 |
| 14440 | DLAT     | 5.562310153 | Tumor_G3 |
| 14441 | PDC      | 0           | Tumor_G3 |
| 14442 | SUCLG2   | 6.404921776 | Tumor_G3 |
| 14443 | SLC25A5  | 8.543095142 | Tumor_G3 |
| 14444 | UCP2     | 8.777074979 | Tumor_G3 |
| 14445 | SOD2     | 4.999350492 | Tumor_G3 |
| 14446 | NOX4     | 0.953108748 | Tumor_G3 |
| 14447 | DUOX1    | 7.786966941 | Tumor_G3 |
| 14448 | DUOXA1   | 5.800818831 | Tumor_G3 |
| 14449 | DUOX2    | 7.215169263 | Tumor_G3 |
| 14450 | DUOXA2   | 7.980031862 | Tumor_G3 |
| 14451 | NDUFA1   | 8.959137812 | Tumor_G3 |
| 14452 | NDUFA2   | 7.515523888 | Tumor_G3 |
| 14453 | NDUFA8   | 7.962384726 | Tumor_G3 |
| 14454 | NDUFB1   | 6.550045709 | Tumor_G3 |
| 14455 | NDUFB10  | 8.150033846 | Tumor_G3 |
| 14456 | NDUFB2   | 7.221325683 | Tumor_G3 |
| 14457 | NDUFB3   | 6.992376798 | Tumor_G3 |
| 14458 | NDUFB7   | 9.52194418  | Tumor_G3 |
| 14459 | CYC1     | 7.882544595 | Tumor_G3 |
| 14460 | ETFB     | 6.654789373 | Tumor_G3 |
| 14461 | UQCR10   | 8.615822647 | Tumor_G3 |
| 14462 | UQCRQ    | 8.049916146 | Tumor_G3 |
| 14463 | UQCC3    | 5.256786215 | Tumor_G3 |
| 14464 | COX15    | 5.448516426 | Tumor_G3 |
| 14465 | COX5A    | 8.288210301 | Tumor_G3 |
| 14466 | COX6B1   | 9.265741992 | Tumor_G3 |
| 14467 | COX6C    | 7.641313459 | Tumor_G3 |
| 14468 | COX7A2   | 7.546217619 | Tumor_G3 |
| 14469 | COX7B    | 7.185043454 | Tumor_G3 |
| 14470 | COX8A    | 10.47221843 | Tumor_G3 |
| 14471 | SCO1     | 3.971000045 | Tumor_G3 |
| 14472 | SURF1    | 7.346629344 | Tumor_G3 |
| 14473 | ATP6V1E1 | 7.122310735 | Tumor_G3 |
| 14474 | DLAT     | 5.502913769 | Tumor_G3 |
| 14475 | PDC      | 0.091014874 | Tumor_G3 |
| 14476 | SUCLG2   | 6.824656031 | Tumor_G3 |
| 14477 | SLC25A5  | 8.641031811 | Tumor_G3 |
| 14478 | UCP2     | 8.444675513 | Tumor_G3 |

|       |          |             |          |
|-------|----------|-------------|----------|
| 14479 | SOD2     | 4.935384053 | Tumor_G3 |
| 14480 | NOX4     | 1.636811212 | Tumor_G3 |
| 14481 | DUOX1    | 7.52465459  | Tumor_G3 |
| 14482 | DUOXA1   | 5.940414559 | Tumor_G3 |
| 14483 | DUOX2    | 8.440388978 | Tumor_G3 |
| 14484 | DUOXA2   | 8.974269068 | Tumor_G3 |
| 14485 | NDUFA1   | 8.553039923 | Tumor_G3 |
| 14486 | NDUFA2   | 7.352508441 | Tumor_G3 |
| 14487 | NDUFA8   | 7.527209338 | Tumor_G3 |
| 14488 | NDUFB1   | 6.200342822 | Tumor_G3 |
| 14489 | NDUFB10  | 8.071366865 | Tumor_G3 |
| 14490 | NDUFB2   | 7.223458328 | Tumor_G3 |
| 14491 | NDUFB3   | 7.072384443 | Tumor_G3 |
| 14492 | NDUFB7   | 7.895947752 | Tumor_G3 |
| 14493 | CYC1     | 7.284068691 | Tumor_G3 |
| 14494 | ETFB     | 5.113463284 | Tumor_G3 |
| 14495 | UQCR10   | 8.350837128 | Tumor_G3 |
| 14496 | UQCRQ    | 7.774088183 | Tumor_G3 |
| 14497 | UQCC3    | 4.132090672 | Tumor_G3 |
| 14498 | COX15    | 5.687873619 | Tumor_G3 |
| 14499 | COX5A    | 7.845804746 | Tumor_G3 |
| 14500 | COX6B1   | 8.999665516 | Tumor_G3 |
| 14501 | COX6C    | 7.03398831  | Tumor_G3 |
| 14502 | COX7A2   | 6.851905345 | Tumor_G3 |
| 14503 | COX7B    | 6.775813335 | Tumor_G3 |
| 14504 | COX8A    | 9.53163204  | Tumor_G3 |
| 14505 | SCO1     | 3.559669012 | Tumor_G3 |
| 14506 | SURF1    | 6.61075551  | Tumor_G3 |
| 14507 | ATP6V1E1 | 6.922747485 | Tumor_G3 |
| 14508 | DLAT     | 5.547052692 | Tumor_G3 |
| 14509 | PDC      | 0.246955999 | Tumor_G3 |
| 14510 | SUCLG2   | 6.053516425 | Tumor_G3 |
| 14511 | SLC25A5  | 8.152070417 | Tumor_G3 |
| 14512 | UCP2     | 6.453199544 | Tumor_G3 |
| 14513 | SOD2     | 5.156041142 | Tumor_G3 |
| 14514 | NOX4     | 0.345578897 | Tumor_G3 |
| 14515 | DUOX1    | 6.3622981   | Tumor_G3 |
| 14516 | DUOXA1   | 6.230044906 | Tumor_G3 |
| 14517 | DUOX2    | 6.491358095 | Tumor_G3 |
| 14518 | DUOXA2   | 4.608450683 | Tumor_G3 |

|       |          |             |          |
|-------|----------|-------------|----------|
| 14519 | NDUFA1   | 8.576297457 | Tumor_G3 |
| 14520 | NDUFA2   | 7.002217096 | Tumor_G3 |
| 14521 | NDUFA8   | 7.890050405 | Tumor_G3 |
| 14522 | NDUFB1   | 6.123330008 | Tumor_G3 |
| 14523 | NDUFB10  | 8.132760262 | Tumor_G3 |
| 14524 | NDUFB2   | 7.572615065 | Tumor_G3 |
| 14525 | NDUFB3   | 6.679841601 | Tumor_G3 |
| 14526 | NDUFB7   | 8.755365314 | Tumor_G3 |
| 14527 | CYC1     | 7.644666093 | Tumor_G3 |
| 14528 | ETFB     | 5.537517414 | Tumor_G3 |
| 14529 | UQCR10   | 8.76426676  | Tumor_G3 |
| 14530 | UQCRQ    | 7.603982948 | Tumor_G3 |
| 14531 | UQCC3    | 4.84182728  | Tumor_G3 |
| 14532 | COX15    | 5.317695573 | Tumor_G3 |
| 14533 | COX5A    | 7.51807461  | Tumor_G3 |
| 14534 | COX6B1   | 9.179177847 | Tumor_G3 |
| 14535 | COX6C    | 7.002524269 | Tumor_G3 |
| 14536 | COX7A2   | 7.111097546 | Tumor_G3 |
| 14537 | COX7B    | 6.888335642 | Tumor_G3 |
| 14538 | COX8A    | 10.32596001 | Tumor_G3 |
| 14539 | SCO1     | 4.381906959 | Tumor_G3 |
| 14540 | SURF1    | 6.780865936 | Tumor_G3 |
| 14541 | ATP6V1E1 | 6.434500387 | Tumor_G3 |
| 14542 | DLAT     | 5.514954232 | Tumor_G3 |
| 14543 | PDC      | 0.252629849 | Tumor_G3 |
| 14544 | SUCLG2   | 6.200597373 | Tumor_G3 |
| 14545 | SLC25A5  | 8.5519048   | Tumor_G3 |
| 14546 | UCP2     | 7.818053036 | Tumor_G3 |
| 14547 | SOD2     | 5.137079085 | Tumor_G3 |
| 14548 | NOX4     | 2.122507455 | Tumor_G3 |
| 14549 | DUOX1    | 8.291241359 | Tumor_G3 |
| 14550 | DUOXA1   | 7.332691038 | Tumor_G3 |
| 14551 | DUOX2    | 8.919295908 | Tumor_G3 |
| 14552 | DUOXA2   | 8.167490532 | Tumor_G3 |
| 14553 | NDUFA1   | 8.795414463 | Tumor_G3 |
| 14554 | NDUFA2   | 7.562071447 | Tumor_G3 |
| 14555 | NDUFA8   | 7.318430946 | Tumor_G3 |
| 14556 | NDUFB1   | 6.580115034 | Tumor_G3 |
| 14557 | NDUFB10  | 8.271812986 | Tumor_G3 |
| 14558 | NDUFB2   | 7.026057878 | Tumor_G3 |

|       |          |             |          |
|-------|----------|-------------|----------|
| 14559 | NDUFB3   | 6.913833966 | Tumor_G3 |
| 14560 | NDUFB7   | 9.356971394 | Tumor_G3 |
| 14561 | CYC1     | 7.353233111 | Tumor_G3 |
| 14562 | ETFB     | 5.686831927 | Tumor_G3 |
| 14563 | UQCR10   | 8.412979402 | Tumor_G3 |
| 14564 | UQCRQ    | 7.856320965 | Tumor_G3 |
| 14565 | UQCC3    | 5.266798996 | Tumor_G3 |
| 14566 | COX15    | 4.551038425 | Tumor_G3 |
| 14567 | COX5A    | 7.742823824 | Tumor_G3 |
| 14568 | COX6B1   | 9.558005943 | Tumor_G3 |
| 14569 | COX6C    | 7.161975212 | Tumor_G3 |
| 14570 | COX7A2   | 7.370025368 | Tumor_G3 |
| 14571 | COX7B    | 6.587228039 | Tumor_G3 |
| 14572 | COX8A    | 10.04456913 | Tumor_G3 |
| 14573 | SCO1     | 2.859335558 | Tumor_G3 |
| 14574 | SURF1    | 6.509999996 | Tumor_G3 |
| 14575 | ATP6V1E1 | 6.658592683 | Tumor_G3 |
| 14576 | DLAT     | 3.807782963 | Tumor_G3 |
| 14577 | PDC      | 0           | Tumor_G3 |
| 14578 | SUCLG2   | 5.546245851 | Tumor_G3 |
| 14579 | SLC25A5  | 8.584597168 | Tumor_G3 |
| 14580 | UCP2     | 8.379842718 | Tumor_G3 |
| 14581 | SOD2     | 4.624252455 | Tumor_G3 |
| 14582 | NOX4     | 0.495763327 | Tumor_G3 |
| 14583 | DUOX1    | 4.621775589 | Tumor_G3 |
| 14584 | DUOXA1   | 4.812591054 | Tumor_G3 |
| 14585 | DUOX2    | 4.416553995 | Tumor_G3 |
| 14586 | DUOXA2   | 4.734882572 | Tumor_G3 |
| 14587 | NDUFA1   | 9.221374131 | Tumor_G3 |
| 14588 | NDUFA2   | 7.701979417 | Tumor_G3 |
| 14589 | NDUFA8   | 8.102896943 | Tumor_G3 |
| 14590 | NDUFB1   | 7.357512872 | Tumor_G3 |
| 14591 | NDUFB10  | 8.279059971 | Tumor_G3 |
| 14592 | NDUFB2   | 7.750725533 | Tumor_G3 |
| 14593 | NDUFB3   | 7.40615409  | Tumor_G3 |
| 14594 | NDUFB7   | 9.729037512 | Tumor_G3 |
| 14595 | CYC1     | 7.718263824 | Tumor_G3 |
| 14596 | ETFB     | 6.326111067 | Tumor_G3 |
| 14597 | UQCR10   | 8.789455872 | Tumor_G3 |
| 14598 | UQCRQ    | 8.389364036 | Tumor_G3 |

|       |          |             |          |
|-------|----------|-------------|----------|
| 14599 | UQCC3    | 5.046323555 | Tumor_G3 |
| 14600 | COX15    | 4.514653432 | Tumor_G3 |
| 14601 | COX5A    | 7.808626362 | Tumor_G3 |
| 14602 | COX6B1   | 9.638270478 | Tumor_G3 |
| 14603 | COX6C    | 7.44306451  | Tumor_G3 |
| 14604 | COX7A2   | 7.727062941 | Tumor_G3 |
| 14605 | COX7B    | 7.327727005 | Tumor_G3 |
| 14606 | COX8A    | 10.71374276 | Tumor_G3 |
| 14607 | SCO1     | 3.14720576  | Tumor_G3 |
| 14608 | SURF1    | 6.624324979 | Tumor_G3 |
| 14609 | ATP6V1E1 | 7.078251165 | Tumor_G3 |
| 14610 | DLAT     | 4.601349354 | Tumor_G3 |
| 14611 | PDC      | 0           | Tumor_G3 |
| 14612 | SUCLG2   | 5.466864856 | Tumor_G3 |
| 14613 | SLC25A5  | 8.293410073 | Tumor_G3 |
| 14614 | UCP2     | 7.010906826 | Tumor_G3 |
| 14615 | SOD2     | 4.645967229 | Tumor_G3 |
| 14616 | NOX4     | 2.302798046 | Tumor_G3 |
| 14617 | DUOX1    | 7.119221178 | Tumor_G3 |
| 14618 | DUOXA1   | 6.853323326 | Tumor_G3 |
| 14619 | DUOX2    | 7.17705412  | Tumor_G3 |
| 14620 | DUOXA2   | 5.620739379 | Tumor_G3 |
| 14621 | NDUFA1   | 8.736609035 | Tumor_G3 |
| 14622 | NDUFA2   | 7.888830678 | Tumor_G3 |
| 14623 | NDUFA8   | 7.753570345 | Tumor_G3 |
| 14624 | NDUFB1   | 7.127971509 | Tumor_G3 |
| 14625 | NDUFB10  | 8.352779814 | Tumor_G3 |
| 14626 | NDUFB2   | 7.785015549 | Tumor_G3 |
| 14627 | NDUFB3   | 7.631318043 | Tumor_G3 |
| 14628 | NDUFB7   | 9.704356185 | Tumor_G3 |
| 14629 | CYC1     | 7.643371333 | Tumor_G3 |
| 14630 | ETFB     | 5.516424399 | Tumor_G3 |
| 14631 | UQCR10   | 8.793184708 | Tumor_G3 |
| 14632 | UQCRQ    | 8.445265707 | Tumor_G3 |
| 14633 | UQCC3    | 5.437928755 | Tumor_G3 |
| 14634 | COX15    | 4.999057135 | Tumor_G3 |
| 14635 | COX5A    | 8.056754081 | Tumor_G3 |
| 14636 | COX6B1   | 9.628042915 | Tumor_G3 |
| 14637 | COX6C    | 7.493795423 | Tumor_G3 |
| 14638 | COX7A2   | 8.040830232 | Tumor_G3 |

|       |          |             |          |
|-------|----------|-------------|----------|
| 14639 | COX7B    | 7.697001449 | Tumor_G3 |
| 14640 | COX8A    | 10.76236445 | Tumor_G3 |
| 14641 | SCO1     | 3.645359152 | Tumor_G3 |
| 14642 | SURF1    | 7.229231276 | Tumor_G3 |
| 14643 | ATP6V1E1 | 6.892698499 | Tumor_G3 |
| 14644 | DLAT     | 5.164403967 | Tumor_G3 |
| 14645 | PDC      | 0           | Tumor_G3 |
| 14646 | SUCLG2   | 6.202789558 | Tumor_G3 |
| 14647 | SLC25A5  | 8.670692196 | Tumor_G3 |
| 14648 | UCP2     | 8.004034505 | Tumor_G3 |
| 14649 | SOD2     | 4.515366003 | Tumor_G3 |
| 14650 | NOX4     | 2.370742693 | Tumor_G3 |
| 14651 | DUOX1    | 6.816647709 | Tumor_G3 |
| 14652 | DUOXA1   | 7.057916328 | Tumor_G3 |
| 14653 | DUOX2    | 8.789442886 | Tumor_G3 |
| 14654 | DUOXA2   | 7.978480798 | Tumor_G3 |
| 14655 | NDUFA1   | 9.106548319 | Tumor_G3 |
| 14656 | NDUFA2   | 8.097954838 | Tumor_G3 |
| 14657 | NDUFA8   | 7.461763313 | Tumor_G3 |
| 14658 | NDUFB1   | 6.693798255 | Tumor_G3 |
| 14659 | NDUFB10  | 8.55104297  | Tumor_G3 |
| 14660 | NDUFB2   | 8.377708041 | Tumor_G3 |
| 14661 | NDUFB3   | 7.259116706 | Tumor_G3 |
| 14662 | NDUFB7   | 10.03825797 | Tumor_G3 |
| 14663 | CYC1     | 7.600363364 | Tumor_G3 |
| 14664 | ETFB     | 5.895548939 | Tumor_G3 |
| 14665 | UQCR10   | 8.550955369 | Tumor_G3 |
| 14666 | UQCRQ    | 8.587256907 | Tumor_G3 |
| 14667 | UQCC3    | 5.589811544 | Tumor_G3 |
| 14668 | COX15    | 4.929496414 | Tumor_G3 |
| 14669 | COX5A    | 7.815093921 | Tumor_G3 |
| 14670 | COX6B1   | 9.312342421 | Tumor_G3 |
| 14671 | COX6C    | 7.223638432 | Tumor_G3 |
| 14672 | COX7A2   | 7.400134739 | Tumor_G3 |
| 14673 | COX7B    | 6.929136415 | Tumor_G3 |
| 14674 | COX8A    | 10.59553441 | Tumor_G3 |
| 14675 | SCO1     | 3.131097333 | Tumor_G3 |
| 14676 | SURF1    | 7.509877734 | Tumor_G3 |
| 14677 | ATP6V1E1 | 7.144844068 | Tumor_G3 |
| 14678 | DLAT     | 4.868956526 | Tumor_G3 |

|       |          |             |          |
|-------|----------|-------------|----------|
| 14679 | PDC      | 0           | Tumor_G3 |
| 14680 | SUCLG2   | 5.878588568 | Tumor_G3 |
| 14681 | SLC25A5  | 8.38995202  | Tumor_G3 |
| 14682 | UCP2     | 6.628099975 | Tumor_G3 |
| 14683 | SOD2     | 4.79192776  | Tumor_G3 |
| 14684 | NOX4     | 0.295551438 | Tumor_G3 |
| 14685 | DUOX1    | 5.677605168 | Tumor_G3 |
| 14686 | DUOXA1   | 5.827436201 | Tumor_G3 |
| 14687 | DUOX2    | 6.591030348 | Tumor_G3 |
| 14688 | DUOXA2   | 7.275318932 | Tumor_G3 |
| 14689 | NDUFA1   | 9.330296163 | Tumor_G3 |
| 14690 | NDUFA2   | 8.174437865 | Tumor_G3 |
| 14691 | NDUFA8   | 8.289096435 | Tumor_G3 |
| 14692 | NDUFB1   | 7.451134258 | Tumor_G3 |
| 14693 | NDUFB10  | 8.89229361  | Tumor_G3 |
| 14694 | NDUFB2   | 7.360097565 | Tumor_G3 |
| 14695 | NDUFB3   | 6.655529888 | Tumor_G3 |
| 14696 | NDUFB7   | 10.11643221 | Tumor_G3 |
| 14697 | CYC1     | 7.316861794 | Tumor_G3 |
| 14698 | ETFB     | 6.534481777 | Tumor_G3 |
| 14699 | UQCR10   | 8.044107993 | Tumor_G3 |
| 14700 | UQCRQ    | 8.623478643 | Tumor_G3 |
| 14701 | UQCC3    | 5.962590819 | Tumor_G3 |
| 14702 | COX15    | 4.650274277 | Tumor_G3 |
| 14703 | COX5A    | 8.125410863 | Tumor_G3 |
| 14704 | COX6B1   | 10.02361065 | Tumor_G3 |
| 14705 | COX6C    | 7.65601572  | Tumor_G3 |
| 14706 | COX7A2   | 7.487455181 | Tumor_G3 |
| 14707 | COX7B    | 7.269211613 | Tumor_G3 |
| 14708 | COX8A    | 11.01540807 | Tumor_G3 |
| 14709 | SCO1     | 2.883433832 | Tumor_G3 |
| 14710 | SURF1    | 7.049374887 | Tumor_G3 |
| 14711 | ATP6V1E1 | 6.375982248 | Tumor_G3 |
| 14712 | DLAT     | 4.192273123 | Tumor_G3 |
| 14713 | PDC      | 0.136663902 | Tumor_G3 |
| 14714 | SUCLG2   | 5.61809424  | Tumor_G3 |
| 14715 | SLC25A5  | 7.502022885 | Tumor_G3 |
| 14716 | UCP2     | 8.704617821 | Tumor_G3 |
| 14717 | SOD2     | 3.834484907 | Tumor_G3 |
| 14718 | NOX4     | 1.988467294 | Tumor_G3 |



|       |          |             |          |
|-------|----------|-------------|----------|
| 14719 | DUOX1    | 7.57301627  | Tumor_G3 |
| 14720 | DUOXA1   | 7.239682261 | Tumor_G3 |
| 14721 | DUOX2    | 8.821405572 | Tumor_G3 |
| 14722 | DUOXA2   | 7.694198537 | Tumor_G3 |
| 14723 | NDUFA1   | 8.486372969 | Tumor_G3 |
| 14724 | NDUFA2   | 7.470471367 | Tumor_G3 |
| 14725 | NDUFA8   | 8.385416243 | Tumor_G3 |
| 14726 | NDUFB1   | 6.066696663 | Tumor_G3 |
| 14727 | NDUFB10  | 8.252339689 | Tumor_G3 |
| 14728 | NDUFB2   | 8.29215566  | Tumor_G3 |
| 14729 | NDUFB3   | 6.713593166 | Tumor_G3 |
| 14730 | NDUFB7   | 9.884548796 | Tumor_G3 |
| 14731 | CYC1     | 7.858410942 | Tumor_G3 |
| 14732 | ETFB     | 6.196397949 | Tumor_G3 |
| 14733 | UQCR10   | 8.574210754 | Tumor_G3 |
| 14734 | UQCRQ    | 8.033096558 | Tumor_G3 |
| 14735 | UQCC3    | 5.453312702 | Tumor_G3 |
| 14736 | COX15    | 5.255575401 | Tumor_G3 |
| 14737 | COX5A    | 6.937029881 | Tumor_G3 |
| 14738 | COX6B1   | 9.314569262 | Tumor_G3 |
| 14739 | COX6C    | 6.919425211 | Tumor_G3 |
| 14740 | COX7A2   | 7.189901186 | Tumor_G3 |
| 14741 | COX7B    | 6.757874658 | Tumor_G3 |
| 14742 | COX8A    | 10.91109021 | Tumor_G3 |
| 14743 | SCO1     | 3.833489136 | Tumor_G3 |
| 14744 | SURF1    | 7.270614375 | Tumor_G3 |
| 14745 | ATP6V1E1 | 6.993284054 | Tumor_G3 |
| 14746 | DLAT     | 4.895383822 | Tumor_G3 |
| 14747 | PDC      | 0.154930819 | Tumor_G3 |
| 14748 | SUCLG2   | 6.31057126  | Tumor_G3 |
| 14749 | SLC25A5  | 8.646523251 | Tumor_G3 |
| 14750 | UCP2     | 9.260734305 | Tumor_G3 |
| 14751 | SOD2     | 4.437745763 | Tumor_G3 |
| 14752 | NOX4     | 2.461315527 | Tumor_G3 |
| 14753 | DUOX1    | 6.117100932 | Tumor_G3 |
| 14754 | DUOXA1   | 5.474903398 | Tumor_G3 |
| 14755 | DUOX2    | 5.928805365 | Tumor_G3 |
| 14756 | DUOXA2   | 5.375584318 | Tumor_G3 |
| 14757 | NDUFA1   | 8.778747635 | Tumor_G3 |
| 14758 | NDUFA2   | 7.6071948   | Tumor_G3 |

|       |          |             |          |
|-------|----------|-------------|----------|
| 14759 | NDUFA8   | 7.806334334 | Tumor_G3 |
| 14760 | NDUFB1   | 6.551666054 | Tumor_G3 |
| 14761 | NDUFB10  | 8.06729541  | Tumor_G3 |
| 14762 | NDUFB2   | 7.50051725  | Tumor_G3 |
| 14763 | NDUFB3   | 6.741412483 | Tumor_G3 |
| 14764 | NDUFB7   | 9.587258735 | Tumor_G3 |
| 14765 | CYC1     | 7.525860844 | Tumor_G3 |
| 14766 | ETFB     | 5.806722233 | Tumor_G3 |
| 14767 | UQCR10   | 8.226576791 | Tumor_G3 |
| 14768 | UQCRQ    | 8.041372744 | Tumor_G3 |
| 14769 | UQCC3    | 5.30704105  | Tumor_G3 |
| 14770 | COX15    | 4.633052539 | Tumor_G3 |
| 14771 | COX5A    | 7.598256067 | Tumor_G3 |
| 14772 | COX6B1   | 9.484332787 | Tumor_G3 |
| 14773 | COX6C    | 7.229057503 | Tumor_G3 |
| 14774 | COX7A2   | 7.485101178 | Tumor_G3 |
| 14775 | COX7B    | 6.654350908 | Tumor_G3 |
| 14776 | COX8A    | 10.34890084 | Tumor_G3 |
| 14777 | SCO1     | 2.96942767  | Tumor_G3 |
| 14778 | SURF1    | 6.424427098 | Tumor_G3 |
| 14779 | ATP6V1E1 | 6.816991816 | Tumor_G3 |
| 14780 | DLAT     | 4.758407781 | Tumor_G3 |
| 14781 | PDC      | 0           | Tumor_G3 |
| 14782 | SUCLG2   | 5.724006006 | Tumor_G3 |
| 14783 | SLC25A5  | 8.375310948 | Tumor_G3 |
| 14784 | UCP2     | 8.31431667  | Tumor_G3 |
| 14785 | SOD2     | 5.054686199 | Tumor_G3 |
| 14786 | NOX4     | 1.374015869 | Tumor_G3 |
| 14787 | DUOX1    | 6.558788371 | Tumor_G3 |
| 14788 | DUOXA1   | 6.632760234 | Tumor_G3 |
| 14789 | DUOX2    | 7.390802612 | Tumor_G3 |
| 14790 | DUOXA2   | 6.060150358 | Tumor_G3 |
| 14791 | NDUFA1   | 8.489761328 | Tumor_G3 |
| 14792 | NDUFA2   | 7.717738456 | Tumor_G3 |
| 14793 | NDUFA8   | 7.341644889 | Tumor_G3 |
| 14794 | NDUFB1   | 6.253635135 | Tumor_G3 |
| 14795 | NDUFB10  | 7.688038943 | Tumor_G3 |
| 14796 | NDUFB2   | 7.442410721 | Tumor_G3 |
| 14797 | NDUFB3   | 6.634470623 | Tumor_G3 |
| 14798 | NDUFB7   | 9.449179841 | Tumor_G3 |

|       |          |             |          |
|-------|----------|-------------|----------|
| 14799 | CYC1     | 7.317102932 | Tumor_G3 |
| 14800 | ETFB     | 5.542977248 | Tumor_G3 |
| 14801 | UQCR10   | 8.302999442 | Tumor_G3 |
| 14802 | UQCRQ    | 8.042409871 | Tumor_G3 |
| 14803 | UQCC3    | 5.021409102 | Tumor_G3 |
| 14804 | COX15    | 4.273677782 | Tumor_G3 |
| 14805 | COX5A    | 7.575952483 | Tumor_G3 |
| 14806 | COX6B1   | 9.467281475 | Tumor_G3 |
| 14807 | COX6C    | 7.046514794 | Tumor_G3 |
| 14808 | COX7A2   | 7.584504104 | Tumor_G3 |
| 14809 | COX7B    | 6.243489332 | Tumor_G3 |
| 14810 | COX8A    | 9.789315262 | Tumor_G3 |
| 14811 | SCO1     | 2.777969561 | Tumor_G3 |
| 14812 | SURF1    | 6.591444994 | Tumor_G3 |
| 14813 | ATP6V1E1 | 7.658490952 | Tumor_G3 |
| 14814 | DLAT     | 4.442487294 | Tumor_G3 |
| 14815 | PDC      | 0           | Tumor_G3 |
| 14816 | SUCLG2   | 6.090490153 | Tumor_G3 |
| 14817 | SLC25A5  | 8.379049339 | Tumor_G3 |
| 14818 | UCP2     | 8.385908836 | Tumor_G3 |
| 14819 | SOD2     | 4.991551939 | Tumor_G3 |
| 14820 | NOX4     | 1.927062624 | Tumor_G3 |
| 14821 | DUOX1    | 5.005943773 | Tumor_G3 |
| 14822 | DUOXA1   | 5.677541996 | Tumor_G3 |
| 14823 | DUOX2    | 4.053917948 | Tumor_G3 |
| 14824 | DUOXA2   | 3.72180284  | Tumor_G3 |
| 14825 | NDUFA1   | 8.698112594 | Tumor_G3 |
| 14826 | NDUFA2   | 7.929559564 | Tumor_G3 |
| 14827 | NDUFA8   | 8.070027212 | Tumor_G3 |
| 14828 | NDUFB1   | 6.755411065 | Tumor_G3 |
| 14829 | NDUFB10  | 8.6916988   | Tumor_G3 |
| 14830 | NDUFB2   | 8.192920442 | Tumor_G3 |
| 14831 | NDUFB3   | 7.011924992 | Tumor_G3 |
| 14832 | NDUFB7   | 10.39274298 | Tumor_G3 |
| 14833 | CYC1     | 8.15456681  | Tumor_G3 |
| 14834 | ETFB     | 6.832916603 | Tumor_G3 |
| 14835 | UQCR10   | 8.008628395 | Tumor_G3 |
| 14836 | UQCRQ    | 8.997327745 | Tumor_G3 |
| 14837 | UQCC3    | 5.825096549 | Tumor_G3 |
| 14838 | COX15    | 4.79149468  | Tumor_G3 |

|       |          |             |          |
|-------|----------|-------------|----------|
| 14839 | COX5A    | 8.169765333 | Tumor_G3 |
| 14840 | COX6B1   | 9.967461494 | Tumor_G3 |
| 14841 | COX6C    | 7.571707959 | Tumor_G3 |
| 14842 | COX7A2   | 7.927207436 | Tumor_G3 |
| 14843 | COX7B    | 6.995925539 | Tumor_G3 |
| 14844 | COX8A    | 11.29907536 | Tumor_G3 |
| 14845 | SCO1     | 3.443608565 | Tumor_G3 |
| 14846 | SURF1    | 7.489042419 | Tumor_G3 |
| 14847 | ATP6V1E1 | 6.43853008  | Tumor_G3 |
| 14848 | DLAT     | 4.126479896 | Tumor_G3 |
| 14849 | PDC      | 0           | Tumor_G3 |
| 14850 | SUCLG2   | 6.028085371 | Tumor_G3 |
| 14851 | SLC25A5  | 8.83830858  | Tumor_G3 |
| 14852 | UCP2     | 8.956359341 | Tumor_G3 |
| 14853 | SOD2     | 3.987578271 | Tumor_G3 |
| 14854 | NOX4     | 0.974637894 | Tumor_G3 |
| 14855 | DUOX1    | 7.44974138  | Tumor_G3 |
| 14856 | DUOXA1   | 7.188476593 | Tumor_G3 |
| 14857 | DUOX2    | 8.479109552 | Tumor_G3 |
| 14858 | DUOXA2   | 8.119236689 | Tumor_G3 |
| 14859 | NDUFA1   | 8.668291736 | Tumor_G3 |
| 14860 | NDUFA2   | 7.10100372  | Tumor_G3 |
| 14861 | NDUFA8   | 7.866778257 | Tumor_G3 |
| 14862 | NDUFB1   | 6.320734779 | Tumor_G3 |
| 14863 | NDUFB10  | 8.373752777 | Tumor_G3 |
| 14864 | NDUFB2   | 7.44361745  | Tumor_G3 |
| 14865 | NDUFB3   | 6.627614365 | Tumor_G3 |
| 14866 | NDUFB7   | 9.627482745 | Tumor_G3 |
| 14867 | CYC1     | 7.75035522  | Tumor_G3 |
| 14868 | ETFB     | 5.594034707 | Tumor_G3 |
| 14869 | UQCR10   | 8.86807829  | Tumor_G3 |
| 14870 | UQCRQ    | 7.936021466 | Tumor_G3 |
| 14871 | UQCC3    | 5.247018177 | Tumor_G3 |
| 14872 | COX15    | 4.727694016 | Tumor_G3 |
| 14873 | COX5A    | 7.853053834 | Tumor_G3 |
| 14874 | COX6B1   | 9.334579657 | Tumor_G3 |
| 14875 | COX6C    | 6.939048005 | Tumor_G3 |
| 14876 | COX7A2   | 7.164796768 | Tumor_G3 |
| 14877 | COX7B    | 7.047537805 | Tumor_G3 |
| 14878 | COX8A    | 10.57779195 | Tumor_G3 |

|       |          |             |          |
|-------|----------|-------------|----------|
| 14879 | SCO1     | 4.051448077 | Tumor_G3 |
| 14880 | SURF1    | 6.747257478 | Tumor_G3 |
| 14881 | ATP6V1E1 | 6.2624486   | Tumor_G3 |
| 14882 | DLAT     | 5.279814093 | Tumor_G3 |
| 14883 | PDC      | 0.285676216 | Tumor_G3 |
| 14884 | SUCLG2   | 5.584106518 | Tumor_G3 |
| 14885 | SLC25A5  | 8.438934139 | Tumor_G3 |
| 14886 | UCP2     | 7.872242768 | Tumor_G3 |
| 14887 | SOD2     | 4.664616633 | Tumor_G3 |
| 14888 | NOX4     | 2.051624456 | Tumor_G3 |
| 14889 | DUOX1    | 7.846359097 | Tumor_G3 |
| 14890 | DUOXA1   | 7.366454319 | Tumor_G3 |
| 14891 | DUOX2    | 8.85830774  | Tumor_G3 |
| 14892 | DUOXA2   | 7.829371737 | Tumor_G3 |
| 14893 | NDUFA1   | 8.351299568 | Tumor_G3 |
| 14894 | NDUFA2   | 7.127425304 | Tumor_G3 |
| 14895 | NDUFA8   | 7.416051745 | Tumor_G3 |
| 14896 | NDUFB1   | 6.633077728 | Tumor_G3 |
| 14897 | NDUFB10  | 7.82123759  | Tumor_G3 |
| 14898 | NDUFB2   | 6.662433575 | Tumor_G3 |
| 14899 | NDUFB3   | 6.477591099 | Tumor_G3 |
| 14900 | NDUFB7   | 9.247738425 | Tumor_G3 |
| 14901 | CYC1     | 7.003684789 | Tumor_G3 |
| 14902 | ETFB     | 5.280986558 | Tumor_G3 |
| 14903 | UQCR10   | 7.87475561  | Tumor_G3 |
| 14904 | UQCRQ    | 7.880870012 | Tumor_G3 |
| 14905 | UQCC3    | 4.801323167 | Tumor_G3 |
| 14906 | COX15    | 4.715297021 | Tumor_G3 |
| 14907 | COX5A    | 7.186008738 | Tumor_G3 |
| 14908 | COX6B1   | 9.052032298 | Tumor_G3 |
| 14909 | COX6C    | 7.181963395 | Tumor_G3 |
| 14910 | COX7A2   | 7.29561213  | Tumor_G3 |
| 14911 | COX7B    | 6.42325297  | Tumor_G3 |
| 14912 | COX8A    | 9.482428551 | Tumor_G3 |
| 14913 | SCO1     | 2.932203328 | Tumor_G3 |
| 14914 | SURF1    | 6.454162573 | Tumor_G3 |
| 14915 | ATP6V1E1 | 6.702865924 | Tumor_G3 |
| 14916 | DLAT     | 4.70564037  | Tumor_G3 |
| 14917 | PDC      | 0.166589472 | Tumor_G3 |
| 14918 | SUCLG2   | 5.98062425  | Tumor_G3 |

|       |          |             |          |
|-------|----------|-------------|----------|
| 14919 | SLC25A5  | 7.677914729 | Tumor_G3 |
| 14920 | UCP2     | 6.690845799 | Tumor_G3 |
| 14921 | SOD2     | 4.357881117 | Tumor_G3 |
| 14922 | NOX4     | 2.199670664 | Tumor_G3 |
| 14923 | DUOX1    | 8.142460436 | Tumor_G3 |
| 14924 | DUOXA1   | 7.807679744 | Tumor_G3 |
| 14925 | DUOX2    | 8.258428572 | Tumor_G3 |
| 14926 | DUOXA2   | 6.063581588 | Tumor_G3 |
| 14927 | NDUFA1   | 9.109750437 | Tumor_G3 |
| 14928 | NDUFA2   | 7.939575616 | Tumor_G3 |
| 14929 | NDUFA8   | 7.785890655 | Tumor_G3 |
| 14930 | NDUFB1   | 6.883895995 | Tumor_G3 |
| 14931 | NDUFB10  | 8.358513386 | Tumor_G3 |
| 14932 | NDUFB2   | 6.577183373 | Tumor_G3 |
| 14933 | NDUFB3   | 6.491540105 | Tumor_G3 |
| 14934 | NDUFB7   | 9.87403885  | Tumor_G3 |
| 14935 | CYC1     | 7.314179341 | Tumor_G3 |
| 14936 | ETFB     | 5.500446233 | Tumor_G3 |
| 14937 | UQCR10   | 7.59727992  | Tumor_G3 |
| 14938 | UQCRQ    | 8.222400235 | Tumor_G3 |
| 14939 | UQCC3    | 5.612366086 | Tumor_G3 |
| 14940 | COX15    | 5.025665701 | Tumor_G3 |
| 14941 | COX5A    | 7.245841154 | Tumor_G3 |
| 14942 | COX6B1   | 9.691223591 | Tumor_G3 |
| 14943 | COX6C    | 7.570908263 | Tumor_G3 |
| 14944 | COX7A2   | 7.348228302 | Tumor_G3 |
| 14945 | COX7B    | 6.758933104 | Tumor_G3 |
| 14946 | COX8A    | 10.19237944 | Tumor_G3 |
| 14947 | SCO1     | 2.718943078 | Tumor_G3 |
| 14948 | SURF1    | 7.109463814 | Tumor_G3 |
| 14949 | ATP6V1E1 | 6.099995676 | Tumor_G3 |
| 14950 | DLAT     | 4.571572648 | Tumor_G3 |
| 14951 | PDC      | 0.2527517   | Tumor_G3 |
| 14952 | SUCLG2   | 6.107243608 | Tumor_G3 |
| 14953 | SLC25A5  | 7.352684979 | Tumor_G3 |
| 14954 | UCP2     | 7.391611148 | Tumor_G3 |
| 14955 | SOD2     | 3.628578689 | Tumor_G3 |
| 14956 | NOX4     | 1.913587056 | Tumor_G3 |
| 14957 | DUOX1    | 7.979151612 | Tumor_G3 |
| 14958 | DUOXA1   | 7.847688768 | Tumor_G3 |

|       |          |             |          |
|-------|----------|-------------|----------|
| 14959 | DUOX2    | 9.287660269 | Tumor_G3 |
| 14960 | DUOXA2   | 7.290383828 | Tumor_G3 |
| 14961 | NDUFA1   | 8.673842654 | Tumor_G3 |
| 14962 | NDUFA2   | 6.976432508 | Tumor_G3 |
| 14963 | NDUFA8   | 7.616375541 | Tumor_G3 |
| 14964 | NDUFB1   | 6.141769836 | Tumor_G3 |
| 14965 | NDUFB10  | 8.046567913 | Tumor_G3 |
| 14966 | NDUFB2   | 7.534195144 | Tumor_G3 |
| 14967 | NDUFB3   | 6.525097009 | Tumor_G3 |
| 14968 | NDUFB7   | 9.078077194 | Tumor_G3 |
| 14969 | CYC1     | 7.586235301 | Tumor_G3 |
| 14970 | ETFB     | 5.490238592 | Tumor_G3 |
| 14971 | UQCR10   | 8.726960657 | Tumor_G3 |
| 14972 | UQCRQ    | 7.599725813 | Tumor_G3 |
| 14973 | UQCC3    | 5.082050498 | Tumor_G3 |
| 14974 | COX15    | 5.363930871 | Tumor_G3 |
| 14975 | COX5A    | 7.584118255 | Tumor_G3 |
| 14976 | COX6B1   | 9.210503117 | Tumor_G3 |
| 14977 | COX6C    | 7.021752153 | Tumor_G3 |
| 14978 | COX7A2   | 7.014497586 | Tumor_G3 |
| 14979 | COX7B    | 6.701139455 | Tumor_G3 |
| 14980 | COX8A    | 10.21902144 | Tumor_G3 |
| 14981 | SCO1     | 4.448010557 | Tumor_G3 |
| 14982 | SURF1    | 7.073714359 | Tumor_G3 |
| 14983 | ATP6V1E1 | 6.413269345 | Tumor_G3 |
| 14984 | DLAT     | 5.483879823 | Tumor_G3 |
| 14985 | PDC      | 0.301506282 | Tumor_G3 |
| 14986 | SUCLG2   | 6.331116704 | Tumor_G3 |
| 14987 | SLC25A5  | 8.781373768 | Tumor_G3 |
| 14988 | UCP2     | 8.189787869 | Tumor_G3 |
| 14989 | SOD2     | 4.936849579 | Tumor_G3 |
| 14990 | NOX4     | 2.487855636 | Tumor_G3 |
| 14991 | DUOX1    | 7.683077589 | Tumor_G3 |
| 14992 | DUOXA1   | 6.956541289 | Tumor_G3 |
| 14993 | DUOX2    | 8.936449041 | Tumor_G3 |
| 14994 | DUOXA2   | 8.219683294 | Tumor_G3 |
| 14995 | NDUFA1   | 8.171736944 | Tumor_G3 |
| 14996 | NDUFA2   | 7.733685131 | Tumor_G3 |
| 14997 | NDUFA8   | 7.350335746 | Tumor_G3 |
| 14998 | NDUFB1   | 6.427442408 | Tumor_G3 |

|       |          |             |          |
|-------|----------|-------------|----------|
| 14999 | NDUFB10  | 8.672381966 | Tumor_G3 |
| 15000 | NDUFB2   | 7.306069359 | Tumor_G3 |
| 15001 | NDUFB3   | 6.237003658 | Tumor_G3 |
| 15002 | NDUFB7   | 9.860500896 | Tumor_G3 |
| 15003 | CYC1     | 7.178851266 | Tumor_G3 |
| 15004 | ETFB     | 6.23498888  | Tumor_G3 |
| 15005 | UQCR10   | 8.223549061 | Tumor_G3 |
| 15006 | UQCRQ    | 8.143615521 | Tumor_G3 |
| 15007 | UQCC3    | 5.434690103 | Tumor_G3 |
| 15008 | COX15    | 3.928641624 | Tumor_G3 |
| 15009 | COX5A    | 7.420486428 | Tumor_G3 |
| 15010 | COX6B1   | 9.688920553 | Tumor_G3 |
| 15011 | COX6C    | 7.016470616 | Tumor_G3 |
| 15012 | COX7A2   | 7.372992209 | Tumor_G3 |
| 15013 | COX7B    | 6.207315315 | Tumor_G3 |
| 15014 | COX8A    | 10.14017172 | Tumor_G3 |
| 15015 | SCO1     | 2.469032548 | Tumor_G3 |
| 15016 | SURF1    | 6.98895207  | Tumor_G3 |
| 15017 | ATP6V1E1 | 7.118149422 | Tumor_G3 |
| 15018 | DLAT     | 3.695149375 | Tumor_G3 |
| 15019 | PDC      | 0           | Tumor_G3 |
| 15020 | SUCLG2   | 5.247298002 | Tumor_G3 |
| 15021 | SLC25A5  | 7.736086028 | Tumor_G3 |
| 15022 | UCP2     | 7.910633539 | Tumor_G3 |
| 15023 | SOD2     | 4.524643687 | Tumor_G3 |
| 15024 | NOX4     | 3.669759423 | Tumor_G3 |
| 15025 | DUOX1    | 5.246047981 | Tumor_G3 |
| 15026 | DUOXA1   | 6.167587885 | Tumor_G3 |
| 15027 | DUOX2    | 4.401501387 | Tumor_G3 |
| 15028 | DUOXA2   | 3.817401168 | Tumor_G3 |
| 15029 | NDUFA1   | 9.084860244 | Tumor_G3 |
| 15030 | NDUFA2   | 8.090018777 | Tumor_G3 |
| 15031 | NDUFA8   | 8.299402167 | Tumor_G3 |
| 15032 | NDUFB1   | 7.114323481 | Tumor_G3 |
| 15033 | NDUFB10  | 8.559470805 | Tumor_G3 |
| 15034 | NDUFB2   | 8.203673323 | Tumor_G3 |
| 15035 | NDUFB3   | 7.312274583 | Tumor_G3 |
| 15036 | NDUFB7   | 9.796148672 | Tumor_G3 |
| 15037 | CYC1     | 7.844704934 | Tumor_G3 |
| 15038 | ETFB     | 6.49082716  | Tumor_G3 |



|       |          |             |          |
|-------|----------|-------------|----------|
| 15039 | UQCR10   | 8.056324358 | Tumor_G3 |
| 15040 | UQCRQ    | 8.687167745 | Tumor_G3 |
| 15041 | UQCC3    | 5.487441087 | Tumor_G3 |
| 15042 | COX15    | 4.982718347 | Tumor_G3 |
| 15043 | COX5A    | 7.94980603  | Tumor_G3 |
| 15044 | COX6B1   | 10.14277365 | Tumor_G3 |
| 15045 | COX6C    | 7.330715578 | Tumor_G3 |
| 15046 | COX7A2   | 7.941682221 | Tumor_G3 |
| 15047 | COX7B    | 7.190800138 | Tumor_G3 |
| 15048 | COX8A    | 10.77183204 | Tumor_G3 |
| 15049 | SCO1     | 3.72297359  | Tumor_G3 |
| 15050 | SURF1    | 7.579832719 | Tumor_G3 |
| 15051 | ATP6V1E1 | 6.598173107 | Tumor_G3 |
| 15052 | DLAT     | 4.645310106 | Tumor_G3 |
| 15053 | PDC      | 0           | Tumor_G3 |
| 15054 | SUCLG2   | 6.245285779 | Tumor_G3 |
| 15055 | SLC25A5  | 8.576510926 | Tumor_G3 |
| 15056 | UCP2     | 8.721954373 | Tumor_G3 |
| 15057 | SOD2     | 3.852836747 | Tumor_G3 |
| 15058 | NOX4     | 0.573289314 | Tumor_G3 |
| 15059 | DUOX1    | 7.633718167 | Tumor_G3 |
| 15060 | DUOXA1   | 7.35779195  | Tumor_G3 |
| 15061 | DUOX2    | 9.539053441 | Tumor_G3 |
| 15062 | DUOXA2   | 8.32889005  | Tumor_G3 |
| 15063 | NDUFA1   | 8.751391559 | Tumor_G3 |
| 15064 | NDUFA2   | 7.201351601 | Tumor_G3 |
| 15065 | NDUFA8   | 7.756907765 | Tumor_G3 |
| 15066 | NDUFB1   | 6.351369495 | Tumor_G3 |
| 15067 | NDUFB10  | 8.240498378 | Tumor_G3 |
| 15068 | NDUFB2   | 7.34665966  | Tumor_G3 |
| 15069 | NDUFB3   | 6.639132541 | Tumor_G3 |
| 15070 | NDUFB7   | 9.341850002 | Tumor_G3 |
| 15071 | CYC1     | 7.651747253 | Tumor_G3 |
| 15072 | ETFB     | 5.716653634 | Tumor_G3 |
| 15073 | UQCR10   | 8.654667872 | Tumor_G3 |
| 15074 | UQCRQ    | 7.675497822 | Tumor_G3 |
| 15075 | UQCC3    | 5.091183681 | Tumor_G3 |
| 15076 | COX15    | 5.008478005 | Tumor_G3 |
| 15077 | COX5A    | 7.69628242  | Tumor_G3 |
| 15078 | COX6B1   | 9.445084235 | Tumor_G3 |

|       |          |             |          |
|-------|----------|-------------|----------|
| 15079 | COX6C    | 6.979089907 | Tumor_G3 |
| 15080 | COX7A2   | 7.023797143 | Tumor_G3 |
| 15081 | COX7B    | 6.784363336 | Tumor_G3 |
| 15082 | COX8A    | 10.42101477 | Tumor_G3 |
| 15083 | SCO1     | 4.147365676 | Tumor_G3 |
| 15084 | SURF1    | 6.912711552 | Tumor_G3 |
| 15085 | ATP6V1E1 | 6.393648056 | Tumor_G3 |
| 15086 | DLAT     | 4.778110256 | Tumor_G3 |
| 15087 | PDC      | 0           | Tumor_G3 |
| 15088 | SUCLG2   | 6.006434369 | Tumor_G3 |
| 15089 | SLC25A5  | 8.516966327 | Tumor_G3 |
| 15090 | UCP2     | 8.002265512 | Tumor_G3 |
| 15091 | SOD2     | 4.641643246 | Tumor_G3 |
| 15092 | NOX4     | 2.105277069 | Tumor_G3 |
| 15093 | DUOX1    | 7.996714848 | Tumor_G3 |
| 15094 | DUOXA1   | 7.326078711 | Tumor_G3 |
| 15095 | DUOX2    | 8.821722391 | Tumor_G3 |
| 15096 | DUOXA2   | 7.771860945 | Tumor_G3 |
| 15097 | NDUFA1   | 8.275294163 | Tumor_G3 |
| 15098 | NDUFA2   | 7.156214176 | Tumor_G3 |
| 15099 | NDUFA8   | 7.327948949 | Tumor_G3 |
| 15100 | NDUFB1   | 5.989688366 | Tumor_G3 |
| 15101 | NDUFB10  | 7.743187546 | Tumor_G3 |
| 15102 | NDUFB2   | 6.967685054 | Tumor_G3 |
| 15103 | NDUFB3   | 6.6875802   | Tumor_G3 |
| 15104 | NDUFB7   | 8.992895914 | Tumor_G3 |
| 15105 | CYC1     | 6.8472303   | Tumor_G3 |
| 15106 | ETFB     | 5.127794837 | Tumor_G3 |
| 15107 | UQCR10   | 8.005779157 | Tumor_G3 |
| 15108 | UQCRQ    | 7.760125547 | Tumor_G3 |
| 15109 | UQCC3    | 4.489122692 | Tumor_G3 |
| 15110 | COX15    | 4.314765477 | Tumor_G3 |
| 15111 | COX5A    | 7.48667973  | Tumor_G3 |
| 15112 | COX6B1   | 9.153303534 | Tumor_G3 |
| 15113 | COX6C    | 6.809643277 | Tumor_G3 |
| 15114 | COX7A2   | 7.235769398 | Tumor_G3 |
| 15115 | COX7B    | 6.348155234 | Tumor_G3 |
| 15116 | COX8A    | 9.763456844 | Tumor_G3 |
| 15117 | SCO1     | 3.00478831  | Tumor_G3 |
| 15118 | SURF1    | 6.455334866 | Tumor_G3 |

|       |          |             |          |
|-------|----------|-------------|----------|
| 15119 | ATP6V1E1 | 7.466169229 | Tumor_G3 |
| 15120 | DLAT     | 4.765622861 | Tumor_G3 |
| 15121 | PDC      | 0           | Tumor_G3 |
| 15122 | SUCLG2   | 5.891625795 | Tumor_G3 |
| 15123 | SLC25A5  | 8.835984835 | Tumor_G3 |
| 15124 | UCP2     | 7.67958319  | Tumor_G3 |
| 15125 | SOD2     | 5.021512877 | Tumor_G3 |
| 15126 | NOX4     | 3.414625217 | Tumor_G3 |
| 15127 | DUOX1    | 4.685477182 | Tumor_G3 |
| 15128 | DUOXA1   | 5.225907695 | Tumor_G3 |
| 15129 | DUOX2    | 3.691174063 | Tumor_G3 |
| 15130 | DUOXA2   | 1.942202699 | Tumor_G3 |
| 15131 | NDUFA1   | 9.290752509 | Tumor_G3 |
| 15132 | NDUFA2   | 7.998839716 | Tumor_G3 |
| 15133 | NDUFA8   | 7.82178731  | Tumor_G3 |
| 15134 | NDUFB1   | 7.276680019 | Tumor_G3 |
| 15135 | NDUFB10  | 9.001687609 | Tumor_G3 |
| 15136 | NDUFB2   | 7.890914037 | Tumor_G3 |
| 15137 | NDUFB3   | 6.856543553 | Tumor_G3 |
| 15138 | NDUFB7   | 10.70501325 | Tumor_G3 |
| 15139 | CYC1     | 6.836035054 | Tumor_G3 |
| 15140 | ETFB     | 6.731479954 | Tumor_G3 |
| 15141 | UQCR10   | 8.723495147 | Tumor_G3 |
| 15142 | UQCRQ    | 8.238059563 | Tumor_G3 |
| 15143 | UQCC3    | 6.11903901  | Tumor_G3 |
| 15144 | COX15    | 4.790653548 | Tumor_G3 |
| 15145 | COX5A    | 7.670467093 | Tumor_G3 |
| 15146 | COX6B1   | 10.1623335  | Tumor_G3 |
| 15147 | COX6C    | 7.591588901 | Tumor_G3 |
| 15148 | COX7A2   | 6.893440324 | Tumor_G3 |
| 15149 | COX7B    | 7.120055066 | Tumor_G3 |
| 15150 | COX8A    | 10.66820717 | Tumor_G3 |
| 15151 | SCO1     | 2.790669985 | Tumor_G3 |
| 15152 | SURF1    | 7.543630444 | Tumor_G3 |
| 15153 | ATP6V1E1 | 7.16249558  | Tumor_G3 |
| 15154 | DLAT     | 3.947977582 | Tumor_G3 |
| 15155 | PDC      | 0           | Tumor_G3 |
| 15156 | SUCLG2   | 5.257016512 | Tumor_G3 |
| 15157 | SLC25A5  | 7.095065521 | Tumor_G3 |
| 15158 | UCP2     | 9.07540934  | Tumor_G3 |

|       |          |             |          |
|-------|----------|-------------|----------|
| 15159 | SOD2     | 3.583012061 | Tumor_G3 |
| 15160 | NOX4     | 1.687411383 | Tumor_G3 |
| 15161 | DUOX1    | 7.29531345  | Tumor_G3 |
| 15162 | DUOXA1   | 7.54039191  | Tumor_G3 |
| 15163 | DUOX2    | 6.969638718 | Tumor_G3 |
| 15164 | DUOXA2   | 5.998928672 | Tumor_G3 |
| 15165 | NDUFA1   | 9.116131283 | Tumor_G3 |
| 15166 | NDUFA2   | 7.586161207 | Tumor_G3 |
| 15167 | NDUFA8   | 7.794957183 | Tumor_G3 |
| 15168 | NDUFB1   | 6.820236886 | Tumor_G3 |
| 15169 | NDUFB10  | 8.456964026 | Tumor_G3 |
| 15170 | NDUFB2   | 7.315100034 | Tumor_G3 |
| 15171 | NDUFB3   | 6.994627826 | Tumor_G3 |
| 15172 | NDUFB7   | 9.965818323 | Tumor_G3 |
| 15173 | CYC1     | 7.254260087 | Tumor_G3 |
| 15174 | ETFB     | 6.006335732 | Tumor_G3 |
| 15175 | UQCR10   | 8.586821258 | Tumor_G3 |
| 15176 | UQCRQ    | 8.228989953 | Tumor_G3 |
| 15177 | UQCC3    | 5.42474636  | Tumor_G3 |
| 15178 | COX15    | 4.534691924 | Tumor_G3 |
| 15179 | COX5A    | 7.728628312 | Tumor_G3 |
| 15180 | COX6B1   | 9.712635688 | Tumor_G3 |
| 15181 | COX6C    | 7.447644858 | Tumor_G3 |
| 15182 | COX7A2   | 7.503669681 | Tumor_G3 |
| 15183 | COX7B    | 6.706738476 | Tumor_G3 |
| 15184 | COX8A    | 10.18805212 | Tumor_G3 |
| 15185 | SCO1     | 2.95486093  | Tumor_G3 |
| 15186 | SURF1    | 7.097008479 | Tumor_G3 |
| 15187 | ATP6V1E1 | 7.170607753 | Tumor_G3 |
| 15188 | DLAT     | 4.229722588 | Tumor_G3 |
| 15189 | PDC      | 0.063158639 | Tumor_G3 |
| 15190 | SUCLG2   | 5.699385771 | Tumor_G3 |
| 15191 | SLC25A5  | 7.819565206 | Tumor_G3 |
| 15192 | UCP2     | 9.373552694 | Tumor_G3 |
| 15193 | SOD2     | 3.884044636 | Tumor_G3 |
| 15194 | NOX4     | 1.822130902 | Tumor_G3 |
| 15195 | DUOX1    | 6.462719161 | Tumor_G3 |
| 15196 | DUOXA1   | 6.435861417 | Tumor_G3 |
| 15197 | DUOX2    | 7.073848606 | Tumor_G3 |
| 15198 | DUOXA2   | 6.668472978 | Tumor_G3 |

|       |          |             |          |
|-------|----------|-------------|----------|
| 15199 | NDUFA1   | 8.844367767 | Tumor_G3 |
| 15200 | NDUFA2   | 7.472257506 | Tumor_G3 |
| 15201 | NDUFA8   | 7.696910605 | Tumor_G3 |
| 15202 | NDUFB1   | 6.73001465  | Tumor_G3 |
| 15203 | NDUFB10  | 7.922224786 | Tumor_G3 |
| 15204 | NDUFB2   | 7.476621934 | Tumor_G3 |
| 15205 | NDUFB3   | 6.894560033 | Tumor_G3 |
| 15206 | NDUFB7   | 9.331333559 | Tumor_G3 |
| 15207 | CYC1     | 7.213413877 | Tumor_G3 |
| 15208 | ETFB     | 5.468338754 | Tumor_G3 |
| 15209 | UQCR10   | 8.237255373 | Tumor_G3 |
| 15210 | UQCRQ    | 8.010087456 | Tumor_G3 |
| 15211 | UQCC3    | 4.818535048 | Tumor_G3 |
| 15212 | COX15    | 4.708460531 | Tumor_G3 |
| 15213 | COX5A    | 7.72354247  | Tumor_G3 |
| 15214 | COX6B1   | 9.221669844 | Tumor_G3 |
| 15215 | COX6C    | 7.158068653 | Tumor_G3 |
| 15216 | COX7A2   | 7.507903272 | Tumor_G3 |
| 15217 | COX7B    | 6.986951215 | Tumor_G3 |
| 15218 | COX8A    | 10.32833905 | Tumor_G3 |
| 15219 | SCO1     | 3.198272308 | Tumor_G3 |
| 15220 | SURF1    | 6.877296644 | Tumor_G3 |
| 15221 | ATP6V1E1 | 6.80371374  | Tumor_G3 |
| 15222 | DLAT     | 4.958734209 | Tumor_G3 |
| 15223 | PDC      | 0.241222903 | Tumor_G3 |
| 15224 | SUCLG2   | 6.087079589 | Tumor_G3 |
| 15225 | SLC25A5  | 8.158687984 | Tumor_G3 |
| 15226 | UCP2     | 7.824705183 | Tumor_G3 |
| 15227 | SOD2     | 4.062557102 | Tumor_G3 |
| 15228 | NOX4     | 0.863539007 | Tumor_G3 |
| 15229 | DUOX1    | 6.845936241 | Tumor_G3 |
| 15230 | DUOXA1   | 6.732412552 | Tumor_G3 |
| 15231 | DUOX2    | 7.732387349 | Tumor_G3 |
| 15232 | DUOXA2   | 6.791075243 | Tumor_G3 |
| 15233 | NDUFA1   | 8.718440487 | Tumor_G3 |
| 15234 | NDUFA2   | 7.565930895 | Tumor_G3 |
| 15235 | NDUFA8   | 7.452988876 | Tumor_G3 |
| 15236 | NDUFB1   | 6.635213791 | Tumor_G3 |
| 15237 | NDUFB10  | 7.737219813 | Tumor_G3 |
| 15238 | NDUFB2   | 7.38120868  | Tumor_G3 |

|       |          |             |          |
|-------|----------|-------------|----------|
| 15239 | NDUFB3   | 6.694716938 | Tumor_G3 |
| 15240 | NDUFB7   | 9.417400258 | Tumor_G3 |
| 15241 | CYC1     | 7.262347515 | Tumor_G3 |
| 15242 | ETFB     | 5.138573966 | Tumor_G3 |
| 15243 | UQCR10   | 8.390398091 | Tumor_G3 |
| 15244 | UQCRQ    | 8.016404679 | Tumor_G3 |
| 15245 | UQCC3    | 4.893193349 | Tumor_G3 |
| 15246 | COX15    | 4.490588759 | Tumor_G3 |
| 15247 | COX5A    | 7.471094533 | Tumor_G3 |
| 15248 | COX6B1   | 9.439309281 | Tumor_G3 |
| 15249 | COX6C    | 7.415555664 | Tumor_G3 |
| 15250 | COX7A2   | 7.461749288 | Tumor_G3 |
| 15251 | COX7B    | 6.854538535 | Tumor_G3 |
| 15252 | COX8A    | 10.16888819 | Tumor_G3 |
| 15253 | SCO1     | 3.242087955 | Tumor_G3 |
| 15254 | SURF1    | 6.782718209 | Tumor_G3 |
| 15255 | ATP6V1E1 | 6.795818966 | Tumor_G3 |
| 15256 | DLAT     | 4.985529175 | Tumor_G3 |
| 15257 | PDC      | 0.24955754  | Tumor_G3 |
| 15258 | SUCLG2   | 6.145727691 | Tumor_G3 |
| 15259 | SLC25A5  | 7.891152096 | Tumor_G3 |
| 15260 | UCP2     | 7.151715377 | Tumor_G3 |
| 15261 | SOD2     | 4.188088071 | Tumor_G3 |
| 15262 | NOX4     | 1.925952895 | Tumor_G3 |
| 15263 | DUOX1    | 7.800192212 | Tumor_G3 |
| 15264 | DUOXA1   | 7.427000115 | Tumor_G3 |
| 15265 | DUOX2    | 8.396670541 | Tumor_G3 |
| 15266 | DUOXA2   | 6.79520995  | Tumor_G3 |
| 15267 | NDUFA1   | 8.755806838 | Tumor_G3 |
| 15268 | NDUFA2   | 7.555403569 | Tumor_G3 |
| 15269 | NDUFA8   | 7.694797709 | Tumor_G3 |
| 15270 | NDUFB1   | 6.416465842 | Tumor_G3 |
| 15271 | NDUFB10  | 8.072411913 | Tumor_G3 |
| 15272 | NDUFB2   | 7.344683254 | Tumor_G3 |
| 15273 | NDUFB3   | 6.734533105 | Tumor_G3 |
| 15274 | NDUFB7   | 9.31057958  | Tumor_G3 |
| 15275 | CYC1     | 7.559393295 | Tumor_G3 |
| 15276 | ETFB     | 5.827206607 | Tumor_G3 |
| 15277 | UQCR10   | 7.775510503 | Tumor_G3 |
| 15278 | UQCRQ    | 7.956035328 | Tumor_G3 |

|       |          |             |          |
|-------|----------|-------------|----------|
| 15279 | UQCC3    | 5.31053111  | Tumor_G3 |
| 15280 | COX15    | 5.054181873 | Tumor_G3 |
| 15281 | COX5A    | 7.293220078 | Tumor_G3 |
| 15282 | COX6B1   | 9.329879493 | Tumor_G3 |
| 15283 | COX6C    | 7.056847949 | Tumor_G3 |
| 15284 | COX7A2   | 7.406322428 | Tumor_G3 |
| 15285 | COX7B    | 6.601917442 | Tumor_G3 |
| 15286 | COX8A    | 10.29207784 | Tumor_G3 |
| 15287 | SCO1     | 3.149179822 | Tumor_G3 |
| 15288 | SURF1    | 6.865342966 | Tumor_G3 |
| 15289 | ATP6V1E1 | 6.77475769  | Tumor_G3 |
| 15290 | DLAT     | 5.027538627 | Tumor_G3 |
| 15291 | PDC      | 0.274635247 | Tumor_G3 |
| 15292 | SUCLG2   | 6.344974338 | Tumor_G3 |
| 15293 | SLC25A5  | 8.051076498 | Tumor_G3 |
| 15294 | UCP2     | 8.729180892 | Tumor_G3 |
| 15295 | SOD2     | 4.074765649 | Tumor_G3 |
| 15296 | NOX4     | 2.38376152  | Tumor_G3 |
| 15297 | DUOX1    | 7.750375864 | Tumor_G3 |
| 15298 | DUOXA1   | 7.456319355 | Tumor_G3 |
| 15299 | DUOX2    | 9.101188314 | Tumor_G3 |
| 15300 | DUOXA2   | 6.869314416 | Tumor_G3 |
| 15301 | NDUFA1   | 8.782779066 | Tumor_G3 |
| 15302 | NDUFA2   | 7.761011854 | Tumor_G3 |
| 15303 | NDUFA8   | 7.662093464 | Tumor_G3 |
| 15304 | NDUFB1   | 6.776880821 | Tumor_G3 |
| 15305 | NDUFB10  | 8.131248154 | Tumor_G3 |
| 15306 | NDUFB2   | 7.032548514 | Tumor_G3 |
| 15307 | NDUFB3   | 6.709313848 | Tumor_G3 |
| 15308 | NDUFB7   | 9.600166852 | Tumor_G3 |
| 15309 | CYC1     | 7.417845569 | Tumor_G3 |
| 15310 | ETFB     | 5.717861039 | Tumor_G3 |
| 15311 | UQCR10   | 8.334700981 | Tumor_G3 |
| 15312 | UQCRQ    | 8.34877539  | Tumor_G3 |
| 15313 | UQCC3    | 5.205423903 | Tumor_G3 |
| 15314 | COX15    | 4.530661836 | Tumor_G3 |
| 15315 | COX5A    | 7.849284821 | Tumor_G3 |
| 15316 | COX6B1   | 9.461805995 | Tumor_G3 |
| 15317 | COX6C    | 7.465367977 | Tumor_G3 |
| 15318 | COX7A2   | 7.439172392 | Tumor_G3 |

|       |          |             |          |
|-------|----------|-------------|----------|
| 15319 | COX7B    | 6.844721396 | Tumor_G3 |
| 15320 | COX8A    | 10.42148469 | Tumor_G3 |
| 15321 | SCO1     | 3.300990319 | Tumor_G3 |
| 15322 | SURF1    | 7.20090384  | Tumor_G3 |
| 15323 | ATP6V1E1 | 6.825211799 | Tumor_G3 |
| 15324 | DLAT     | 4.446251394 | Tumor_G3 |
| 15325 | PDC      | 0.118193238 | Tumor_G3 |
| 15326 | SUCLG2   | 6.077997088 | Tumor_G3 |
| 15327 | SLC25A5  | 8.001088102 | Tumor_G3 |
| 15328 | UCP2     | 7.669009942 | Tumor_G3 |
| 15329 | SOD2     | 4.133142565 | Tumor_G3 |
| 15330 | NOX4     | 0.669672379 | Tumor_G3 |
| 15331 | DUOX1    | 8.58247254  | Tumor_G3 |
| 15332 | DUOXA1   | 8.51700536  | Tumor_G3 |
| 15333 | DUOX2    | 9.095376516 | Tumor_G3 |
| 15334 | DUOXA2   | 7.921852981 | Tumor_G3 |
| 15335 | NDUFA1   | 8.385949944 | Tumor_G3 |
| 15336 | NDUFA2   | 7.566751828 | Tumor_G3 |
| 15337 | NDUFA8   | 7.584965024 | Tumor_G3 |
| 15338 | NDUFB1   | 6.335469821 | Tumor_G3 |
| 15339 | NDUFB10  | 8.395434536 | Tumor_G3 |
| 15340 | NDUFB2   | 7.28906916  | Tumor_G3 |
| 15341 | NDUFB3   | 6.616218909 | Tumor_G3 |
| 15342 | NDUFB7   | 9.742728524 | Tumor_G3 |
| 15343 | CYC1     | 7.419531091 | Tumor_G3 |
| 15344 | ETFB     | 6.019899114 | Tumor_G3 |
| 15345 | UQCR10   | 8.389364105 | Tumor_G3 |
| 15346 | UQCRQ    | 8.042043661 | Tumor_G3 |
| 15347 | UQCC3    | 5.558967914 | Tumor_G3 |
| 15348 | COX15    | 4.931501931 | Tumor_G3 |
| 15349 | COX5A    | 7.582042475 | Tumor_G3 |
| 15350 | COX6B1   | 9.394967743 | Tumor_G3 |
| 15351 | COX6C    | 7.169626591 | Tumor_G3 |
| 15352 | COX7A2   | 7.358872184 | Tumor_G3 |
| 15353 | COX7B    | 6.442539117 | Tumor_G3 |
| 15354 | COX8A    | 10.20859033 | Tumor_G3 |
| 15355 | SCO1     | 3.158566925 | Tumor_G3 |
| 15356 | SURF1    | 7.194895695 | Tumor_G3 |
| 15357 | ATP6V1E1 | 6.965608426 | Tumor_G3 |
| 15358 | DLAT     | 4.606329911 | Tumor_G3 |



|       |          |             |          |
|-------|----------|-------------|----------|
| 15359 | PDC      | 0.067854306 | Tumor_G3 |
| 15360 | SUCLG2   | 5.919224717 | Tumor_G3 |
| 15361 | SLC25A5  | 7.616237411 | Tumor_G3 |
| 15362 | UCP2     | 9.621737426 | Tumor_G3 |
| 15363 | SOD2     | 5.212855005 | Tumor_G3 |
| 15364 | NOX4     | 1.011109189 | Tumor_G3 |
| 15365 | DUOX1    | 6.258361785 | Tumor_G3 |
| 15366 | DUOXA1   | 6.908962563 | Tumor_G3 |
| 15367 | DUOX2    | 7.159064958 | Tumor_G3 |
| 15368 | DUOXA2   | 6.872995161 | Tumor_G3 |
| 15369 | NDUFA1   | 8.464158725 | Tumor_G3 |
| 15370 | NDUFA2   | 7.192336757 | Tumor_G3 |
| 15371 | NDUFA8   | 7.164471454 | Tumor_G3 |
| 15372 | NDUFB1   | 6.483287585 | Tumor_G3 |
| 15373 | NDUFB10  | 8.110439846 | Tumor_G3 |
| 15374 | NDUFB2   | 6.758038379 | Tumor_G3 |
| 15375 | NDUFB3   | 7.140045055 | Tumor_G3 |
| 15376 | NDUFB7   | 9.540644787 | Tumor_G3 |
| 15377 | CYC1     | 7.185819166 | Tumor_G3 |
| 15378 | ETFB     | 5.786402969 | Tumor_G3 |
| 15379 | UQCR10   | 7.160178082 | Tumor_G3 |
| 15380 | UQCRQ    | 7.885786714 | Tumor_G3 |
| 15381 | UQCC3    | 5.012619285 | Tumor_G3 |
| 15382 | COX15    | 4.693474908 | Tumor_G3 |
| 15383 | COX5A    | 7.318760371 | Tumor_G3 |
| 15384 | COX6B1   | 9.058611344 | Tumor_G3 |
| 15385 | COX6C    | 6.915750005 | Tumor_G3 |
| 15386 | COX7A2   | 7.180316255 | Tumor_G3 |
| 15387 | COX7B    | 6.693227988 | Tumor_G3 |
| 15388 | COX8A    | 9.934051896 | Tumor_G3 |
| 15389 | SCO1     | 3.654593896 | Tumor_G3 |
| 15390 | SURF1    | 6.015752569 | Tumor_G3 |
| 15391 | ATP6V1E1 | 6.382049426 | Tumor_G3 |
| 15392 | DLAT     | 4.988749209 | Tumor_G3 |
| 15393 | PDC      | 0.059435341 | Tumor_G3 |
| 15394 | SUCLG2   | 6.455647876 | Tumor_G3 |
| 15395 | SLC25A5  | 8.252799036 | Tumor_G3 |
| 15396 | UCP2     | 7.98458886  | Tumor_G3 |
| 15397 | SOD2     | 4.624754187 | Tumor_G3 |
| 15398 | NOX4     | 2.381995322 | Tumor_G3 |

|       |          |             |          |
|-------|----------|-------------|----------|
| 15399 | DUOX1    | 7.936344627 | Tumor_G3 |
| 15400 | DUOXA1   | 7.71502319  | Tumor_G3 |
| 15401 | DUOX2    | 9.507564109 | Tumor_G3 |
| 15402 | DUOXA2   | 7.095282598 | Tumor_G3 |
| 15403 | NDUFA1   | 8.647676438 | Tumor_G3 |
| 15404 | NDUFA2   | 7.370006605 | Tumor_G3 |
| 15405 | NDUFA8   | 7.544386349 | Tumor_G3 |
| 15406 | NDUFB1   | 6.322262538 | Tumor_G3 |
| 15407 | NDUFB10  | 8.320488633 | Tumor_G3 |
| 15408 | NDUFB2   | 7.285380811 | Tumor_G3 |
| 15409 | NDUFB3   | 6.68837607  | Tumor_G3 |
| 15410 | NDUFB7   | 9.40249499  | Tumor_G3 |
| 15411 | CYC1     | 7.020811073 | Tumor_G3 |
| 15412 | ETFB     | 5.836527641 | Tumor_G3 |
| 15413 | UQCR10   | 8.152454131 | Tumor_G3 |
| 15414 | UQCRQ    | 7.856311866 | Tumor_G3 |
| 15415 | UQCC3    | 5.157555314 | Tumor_G3 |
| 15416 | COX15    | 4.40962182  | Tumor_G3 |
| 15417 | COX5A    | 7.784018912 | Tumor_G3 |
| 15418 | COX6B1   | 9.454025576 | Tumor_G3 |
| 15419 | COX6C    | 7.132031291 | Tumor_G3 |
| 15420 | COX7A2   | 7.347988369 | Tumor_G3 |
| 15421 | COX7B    | 6.550865301 | Tumor_G3 |
| 15422 | COX8A    | 9.949745366 | Tumor_G3 |
| 15423 | SCO1     | 2.890430852 | Tumor_G3 |
| 15424 | SURF1    | 6.667955861 | Tumor_G3 |
| 15425 | ATP6V1E1 | 7.263921979 | Tumor_G3 |
| 15426 | DLAT     | 4.152529414 | Tumor_G3 |
| 15427 | PDC      | 0           | Tumor_G3 |
| 15428 | SUCLG2   | 5.537046578 | Tumor_G3 |
| 15429 | SLC25A5  | 8.185923248 | Tumor_G3 |
| 15430 | UCP2     | 8.050322468 | Tumor_G3 |
| 15431 | SOD2     | 4.851054592 | Tumor_G3 |
| 15432 | NOX4     | 2.570273369 | Tumor_G3 |
| 15433 | DUOX1    | 5.299251683 | Tumor_G3 |
| 15434 | DUOXA1   | 5.884612969 | Tumor_G3 |
| 15435 | DUOX2    | 4.864861376 | Tumor_G3 |
| 15436 | DUOXA2   | 4.452218803 | Tumor_G3 |
| 15437 | NDUFA1   | 8.759498758 | Tumor_G3 |
| 15438 | NDUFA2   | 7.364861449 | Tumor_G3 |

|       |          |             |          |
|-------|----------|-------------|----------|
| 15439 | NDUFA8   | 7.626093693 | Tumor_G3 |
| 15440 | NDUFB1   | 6.519951089 | Tumor_G3 |
| 15441 | NDUFB10  | 8.013908472 | Tumor_G3 |
| 15442 | NDUFB2   | 6.048192145 | Tumor_G3 |
| 15443 | NDUFB3   | 7.077339837 | Tumor_G3 |
| 15444 | NDUFB7   | 9.492343588 | Tumor_G3 |
| 15445 | CYC1     | 7.200664145 | Tumor_G3 |
| 15446 | ETFB     | 5.523234321 | Tumor_G3 |
| 15447 | UQCR10   | 8.99876925  | Tumor_G3 |
| 15448 | UQCRQ    | 7.98759772  | Tumor_G3 |
| 15449 | UQCC3    | 5.178026195 | Tumor_G3 |
| 15450 | COX15    | 5.147650085 | Tumor_G3 |
| 15451 | COX5A    | 7.539595306 | Tumor_G3 |
| 15452 | COX6B1   | 9.158458586 | Tumor_G3 |
| 15453 | COX6C    | 8.022355361 | Tumor_G3 |
| 15454 | COX7A2   | 6.845843527 | Tumor_G3 |
| 15455 | COX7B    | 6.593155761 | Tumor_G3 |
| 15456 | COX8A    | 9.700645413 | Tumor_G3 |
| 15457 | SCO1     | 3.643427493 | Tumor_G3 |
| 15458 | SURF1    | 6.456648104 | Tumor_G3 |
| 15459 | ATP6V1E1 | 7.083774794 | Tumor_G3 |
| 15460 | DLAT     | 4.870333906 | Tumor_G3 |
| 15461 | PDC      | 0.067309287 | Tumor_G3 |
| 15462 | SUCLG2   | 5.812954168 | Tumor_G3 |
| 15463 | SLC25A5  | 7.941881136 | Tumor_G3 |
| 15464 | UCP2     | 6.021732103 | Tumor_G3 |
| 15465 | SOD2     | 4.683399969 | Tumor_G3 |
| 15466 | NOX4     | 2.262328297 | Tumor_G3 |
| 15467 | DUOX1    | 1.407442846 | Tumor_G3 |
| 15468 | DUOXA1   | 1.859795018 | Tumor_G3 |
| 15469 | DUOX2    | 0.810945686 | Tumor_G3 |
| 15470 | DUOXA2   | 0.170180073 | Tumor_G3 |
| 15471 | NDUFA1   | 8.345817795 | Tumor_G3 |
| 15472 | NDUFA2   | 7.833346479 | Tumor_G3 |
| 15473 | NDUFA8   | 7.454856341 | Tumor_G3 |
| 15474 | NDUFB1   | 5.963886866 | Tumor_G3 |
| 15475 | NDUFB10  | 8.594475728 | Tumor_G3 |
| 15476 | NDUFB2   | 7.210558125 | Tumor_G3 |
| 15477 | NDUFB3   | 6.305887086 | Tumor_G3 |
| 15478 | NDUFB7   | 9.933333219 | Tumor_G3 |

|       |          |             |          |
|-------|----------|-------------|----------|
| 15479 | CYC1     | 7.328576485 | Tumor_G3 |
| 15480 | ETFB     | 6.453378933 | Tumor_G3 |
| 15481 | UQCR10   | 7.521642359 | Tumor_G3 |
| 15482 | UQCRQ    | 8.053907192 | Tumor_G3 |
| 15483 | UQCC3    | 5.878972234 | Tumor_G3 |
| 15484 | COX15    | 4.167720991 | Tumor_G3 |
| 15485 | COX5A    | 7.387642679 | Tumor_G3 |
| 15486 | COX6B1   | 9.669302353 | Tumor_G3 |
| 15487 | COX6C    | 6.819237931 | Tumor_G3 |
| 15488 | COX7A2   | 7.289382409 | Tumor_G3 |
| 15489 | COX7B    | 6.208516763 | Tumor_G3 |
| 15490 | COX8A    | 10.66000951 | Tumor_G3 |
| 15491 | SCO1     | 2.795707908 | Tumor_G3 |
| 15492 | SURF1    | 7.166039418 | Tumor_G3 |
| 15493 | ATP6V1E1 | 6.464877168 | Tumor_G3 |
| 15494 | DLAT     | 3.779093055 | Tumor_G3 |
| 15495 | PDC      | 0           | Tumor_G3 |
| 15496 | SUCLG2   | 5.280514952 | Tumor_G3 |
| 15497 | SLC25A5  | 7.815958976 | Tumor_G3 |
| 15498 | UCP2     | 8.828691785 | Tumor_G3 |
| 15499 | SOD2     | 4.271645682 | Tumor_G3 |
| 15500 | NOX4     | 2.867917252 | Tumor_G3 |
| 15501 | DUOX1    | 6.788263162 | Tumor_G3 |
| 15502 | DUOXA1   | 6.977501867 | Tumor_G3 |
| 15503 | DUOX2    | 7.287594618 | Tumor_G3 |
| 15504 | DUOXA2   | 5.773364105 | Tumor_G3 |
| 15505 | NDUFA1   | 8.618696035 | Tumor_G3 |
| 15506 | NDUFA2   | 7.373822269 | Tumor_G3 |
| 15507 | NDUFA8   | 7.817384819 | Tumor_G3 |
| 15508 | NDUFB1   | 6.332044577 | Tumor_G3 |
| 15509 | NDUFB10  | 8.289514005 | Tumor_G3 |
| 15510 | NDUFB2   | 7.324175167 | Tumor_G3 |
| 15511 | NDUFB3   | 6.837321619 | Tumor_G3 |
| 15512 | NDUFB7   | 9.537599327 | Tumor_G3 |
| 15513 | CYC1     | 7.342091193 | Tumor_G3 |
| 15514 | ETFB     | 5.742759865 | Tumor_G3 |
| 15515 | UQCR10   | 7.641098857 | Tumor_G3 |
| 15516 | UQCRQ    | 7.962131943 | Tumor_G3 |
| 15517 | UQCC3    | 4.835844195 | Tumor_G3 |
| 15518 | COX15    | 4.673623782 | Tumor_G3 |

|       |          |             |          |
|-------|----------|-------------|----------|
| 15519 | COX5A    | 7.469578503 | Tumor_G3 |
| 15520 | COX6B1   | 9.201997667 | Tumor_G3 |
| 15521 | COX6C    | 6.948789278 | Tumor_G3 |
| 15522 | COX7A2   | 7.39372387  | Tumor_G3 |
| 15523 | COX7B    | 6.473230964 | Tumor_G3 |
| 15524 | COX8A    | 10.37918689 | Tumor_G3 |
| 15525 | SCO1     | 3.26636589  | Tumor_G3 |
| 15526 | SURF1    | 7.211230197 | Tumor_G3 |
| 15527 | ATP6V1E1 | 6.685235974 | Tumor_G3 |
| 15528 | DLAT     | 4.526105266 | Tumor_G3 |
| 15529 | PDC      | 0           | Tumor_G3 |
| 15530 | SUCLG2   | 5.608088325 | Tumor_G3 |
| 15531 | SLC25A5  | 8.332313355 | Tumor_G3 |
| 15532 | UCP2     | 7.297762356 | Tumor_G3 |
| 15533 | SOD2     | 4.318550595 | Tumor_G3 |
| 15534 | NOX4     | 1.18484604  | Tumor_G3 |
| 15535 | DUOX1    | 7.436687633 | Tumor_G3 |
| 15536 | DUOXA1   | 7.17954445  | Tumor_G3 |
| 15537 | DUOX2    | 8.856741463 | Tumor_G3 |
| 15538 | DUOXA2   | 7.079421421 | Tumor_G3 |
| 15539 | NDUFA1   | 8.628869386 | Tumor_G3 |
| 15540 | NDUFA2   | 7.036265981 | Tumor_G3 |
| 15541 | NDUFA8   | 7.545514993 | Tumor_G3 |
| 15542 | NDUFB1   | 6.218984749 | Tumor_G3 |
| 15543 | NDUFB10  | 7.877363974 | Tumor_G3 |
| 15544 | NDUFB2   | 7.262502541 | Tumor_G3 |
| 15545 | NDUFB3   | 6.805498336 | Tumor_G3 |
| 15546 | NDUFB7   | 8.979489263 | Tumor_G3 |
| 15547 | CYC1     | 7.166715238 | Tumor_G3 |
| 15548 | ETFB     | 5.399437184 | Tumor_G3 |
| 15549 | UQCR10   | 8.399056349 | Tumor_G3 |
| 15550 | UQCRQ    | 7.769180909 | Tumor_G3 |
| 15551 | UQCC3    | 4.763446672 | Tumor_G3 |
| 15552 | COX15    | 5.081167921 | Tumor_G3 |
| 15553 | COX5A    | 7.534595762 | Tumor_G3 |
| 15554 | COX6B1   | 8.889081347 | Tumor_G3 |
| 15555 | COX6C    | 6.916958223 | Tumor_G3 |
| 15556 | COX7A2   | 7.22208763  | Tumor_G3 |
| 15557 | COX7B    | 6.694920838 | Tumor_G3 |
| 15558 | COX8A    | 9.957497045 | Tumor_G3 |

|       |          |             |          |
|-------|----------|-------------|----------|
| 15559 | SCO1     | 4.218716947 | Tumor_G3 |
| 15560 | SURF1    | 6.722435152 | Tumor_G3 |
| 15561 | ATP6V1E1 | 6.524998175 | Tumor_G3 |
| 15562 | DLAT     | 5.411002951 | Tumor_G3 |
| 15563 | PDC      | 0.105259603 | Tumor_G3 |
| 15564 | SUCLG2   | 6.386031925 | Tumor_G3 |
| 15565 | SLC25A5  | 8.416267199 | Tumor_G3 |
| 15566 | UCP2     | 7.372423073 | Tumor_G3 |
| 15567 | SOD2     | 5.104948883 | Tumor_G3 |
| 15568 | NOX4     | 2.038745016 | Tumor_G3 |
| 15569 | DUOX1    | 7.909737787 | Tumor_G3 |
| 15570 | DUOXA1   | 6.803332773 | Tumor_G3 |
| 15571 | DUOX2    | 9.212502444 | Tumor_G3 |
| 15572 | DUOXA2   | 7.865886237 | Tumor_G3 |
| 15573 | NDUFA1   | 8.850670178 | Tumor_G3 |
| 15574 | NDUFA2   | 7.437137097 | Tumor_G3 |
| 15575 | NDUFA8   | 7.789010962 | Tumor_G3 |
| 15576 | NDUFB1   | 6.826218286 | Tumor_G3 |
| 15577 | NDUFB10  | 8.226729231 | Tumor_G3 |
| 15578 | NDUFB2   | 7.517098705 | Tumor_G3 |
| 15579 | NDUFB3   | 7.112203586 | Tumor_G3 |
| 15580 | NDUFB7   | 8.338789136 | Tumor_G3 |
| 15581 | CYC1     | 7.660128416 | Tumor_G3 |
| 15582 | ETFB     | 5.843146688 | Tumor_G3 |
| 15583 | UQCR10   | 8.606544941 | Tumor_G3 |
| 15584 | UQCRQ    | 8.023766183 | Tumor_G3 |
| 15585 | UQCC3    | 4.795206591 | Tumor_G3 |
| 15586 | COX15    | 5.602781365 | Tumor_G3 |
| 15587 | COX5A    | 8.030755785 | Tumor_G3 |
| 15588 | COX6B1   | 8.949478767 | Tumor_G3 |
| 15589 | COX6C    | 7.512663306 | Tumor_G3 |
| 15590 | COX7A2   | 7.640629193 | Tumor_G3 |
| 15591 | COX7B    | 7.154592337 | Tumor_G3 |
| 15592 | COX8A    | 10.38198349 | Tumor_G3 |
| 15593 | SCO1     | 4.115526643 | Tumor_G3 |
| 15594 | SURF1    | 7.506357115 | Tumor_G3 |
| 15595 | ATP6V1E1 | 6.987803605 | Tumor_G3 |
| 15596 | DLAT     | 5.698283218 | Tumor_G3 |
| 15597 | PDC      | 0.230450839 | Tumor_G3 |
| 15598 | SUCLG2   | 7.114317044 | Tumor_G3 |

|       |          |             |          |
|-------|----------|-------------|----------|
| 15599 | SLC25A5  | 8.272838631 | Tumor_G3 |
| 15600 | UCP2     | 8.094378807 | Tumor_G3 |
| 15601 | SOD2     | 4.73788707  | Tumor_G3 |
| 15602 | NOX4     | 0.455154874 | Tumor_G3 |
| 15603 | DUOX1    | 7.377508184 | Tumor_G3 |
| 15604 | DUOXA1   | 6.972942977 | Tumor_G3 |
| 15605 | DUOX2    | 7.432790431 | Tumor_G3 |
| 15606 | DUOXA2   | 5.911813299 | Tumor_G3 |
| 15607 | NDUFA1   | 8.129831425 | Tumor_G3 |
| 15608 | NDUFA2   | 8.221235504 | Tumor_G3 |
| 15609 | NDUFA8   | 7.161544144 | Tumor_G3 |
| 15610 | NDUFB1   | 6.153200732 | Tumor_G3 |
| 15611 | NDUFB10  | 7.94998811  | Tumor_G3 |
| 15612 | NDUFB2   | 7.209572874 | Tumor_G3 |
| 15613 | NDUFB3   | 6.68231243  | Tumor_G3 |
| 15614 | NDUFB7   | 9.467435767 | Tumor_G3 |
| 15615 | CYC1     | 7.168276738 | Tumor_G3 |
| 15616 | ETFB     | 5.317666207 | Tumor_G3 |
| 15617 | UQCR10   | 7.898925686 | Tumor_G3 |
| 15618 | UQCRQ    | 8.44440865  | Tumor_G3 |
| 15619 | UQCC3    | 4.972137931 | Tumor_G3 |
| 15620 | COX15    | 4.194478606 | Tumor_G3 |
| 15621 | COX5A    | 7.529832633 | Tumor_G3 |
| 15622 | COX6B1   | 9.392214293 | Tumor_G3 |
| 15623 | COX6C    | 6.658896308 | Tumor_G3 |
| 15624 | COX7A2   | 7.579637067 | Tumor_G3 |
| 15625 | COX7B    | 6.327083508 | Tumor_G3 |
| 15626 | COX8A    | 9.716320664 | Tumor_G3 |
| 15627 | SCO1     | 2.160016666 | Tumor_G3 |
| 15628 | SURF1    | 6.927388133 | Tumor_G3 |
| 15629 | ATP6V1E1 | 7.485223333 | Tumor_G3 |
| 15630 | DLAT     | 4.046742338 | Tumor_G3 |
| 15631 | PDC      | 0           | Tumor_G3 |
| 15632 | SUCLG2   | 5.746078488 | Tumor_G3 |
| 15633 | SLC25A5  | 8.154289348 | Tumor_G3 |
| 15634 | UCP2     | 7.5701644   | Tumor_G3 |
| 15635 | SOD2     | 5.29633422  | Tumor_G3 |
| 15636 | NOX4     | 2.237393516 | Tumor_G3 |
| 15637 | DUOX1    | 3.337413206 | Tumor_G3 |
| 15638 | DUOXA1   | 4.670308791 | Tumor_G3 |

|       |          |             |          |
|-------|----------|-------------|----------|
| 15639 | DUOX2    | 1.980080948 | Tumor_G3 |
| 15640 | DUOXA2   | 1.434993123 | Tumor_G3 |
| 15641 | NDUFA1   | 8.621761378 | Tumor_G3 |
| 15642 | NDUFA2   | 7.31947368  | Tumor_G3 |
| 15643 | NDUFA8   | 7.404244933 | Tumor_G3 |
| 15644 | NDUFB1   | 6.588710378 | Tumor_G3 |
| 15645 | NDUFB10  | 7.871418024 | Tumor_G3 |
| 15646 | NDUFB2   | 6.79469212  | Tumor_G3 |
| 15647 | NDUFB3   | 6.380664923 | Tumor_G3 |
| 15648 | NDUFB7   | 9.229625957 | Tumor_G3 |
| 15649 | CYC1     | 6.933229004 | Tumor_G3 |
| 15650 | ETFB     | 5.251989639 | Tumor_G3 |
| 15651 | UQCR10   | 7.999679894 | Tumor_G3 |
| 15652 | UQCRQ    | 7.972367484 | Tumor_G3 |
| 15653 | UQCC3    | 4.754844335 | Tumor_G3 |
| 15654 | COX15    | 4.479612811 | Tumor_G3 |
| 15655 | COX5A    | 7.266018433 | Tumor_G3 |
| 15656 | COX6B1   | 9.247571881 | Tumor_G3 |
| 15657 | COX6C    | 7.086246506 | Tumor_G3 |
| 15658 | COX7A2   | 7.092934025 | Tumor_G3 |
| 15659 | COX7B    | 6.489059097 | Tumor_G3 |
| 15660 | COX8A    | 9.801940332 | Tumor_G3 |
| 15661 | SCO1     | 2.811494031 | Tumor_G3 |
| 15662 | SURF1    | 6.872110681 | Tumor_G3 |
| 15663 | ATP6V1E1 | 6.692018413 | Tumor_G3 |
| 15664 | DLAT     | 4.282350194 | Tumor_G3 |
| 15665 | PDC      | 0.314236674 | Tumor_G3 |
| 15666 | SUCLG2   | 5.600634271 | Tumor_G3 |
| 15667 | SLC25A5  | 7.23563328  | Tumor_G3 |
| 15668 | UCP2     | 7.770395198 | Tumor_G3 |
| 15669 | SOD2     | 3.931960241 | Tumor_G3 |
| 15670 | NOX4     | 1.390344509 | Tumor_G3 |
| 15671 | DUOX1    | 7.277884011 | Tumor_G3 |
| 15672 | DUOXA1   | 7.262958426 | Tumor_G3 |
| 15673 | DUOX2    | 8.044900267 | Tumor_G3 |
| 15674 | DUOXA2   | 5.764248854 | Tumor_G3 |
| 15675 | NDUFA1   | 9.092396285 | Tumor_G3 |
| 15676 | NDUFA2   | 8.101563077 | Tumor_G3 |
| 15677 | NDUFA8   | 7.849291578 | Tumor_G3 |
| 15678 | NDUFB1   | 7.569829    | Tumor_G3 |



|       |          |             |          |
|-------|----------|-------------|----------|
| 15679 | NDUFB10  | 9.320614026 | Tumor_G3 |
| 15680 | NDUFB2   | 8.078853345 | Tumor_G3 |
| 15681 | NDUFB3   | 6.360984746 | Tumor_G3 |
| 15682 | NDUFB7   | 10.89941546 | Tumor_G3 |
| 15683 | CYC1     | 7.085111868 | Tumor_G3 |
| 15684 | ETFB     | 7.374976537 | Tumor_G3 |
| 15685 | UQCR10   | 8.84819408  | Tumor_G3 |
| 15686 | UQCRQ    | 9.029963232 | Tumor_G3 |
| 15687 | UQCC3    | 6.65466467  | Tumor_G3 |
| 15688 | COX15    | 4.247133936 | Tumor_G3 |
| 15689 | COX5A    | 7.733035085 | Tumor_G3 |
| 15690 | COX6B1   | 10.45539415 | Tumor_G3 |
| 15691 | COX6C    | 7.639946506 | Tumor_G3 |
| 15692 | COX7A2   | 7.651955577 | Tumor_G3 |
| 15693 | COX7B    | 6.764843109 | Tumor_G3 |
| 15694 | COX8A    | 10.24448195 | Tumor_G3 |
| 15695 | SCO1     | 2.580647128 | Tumor_G3 |
| 15696 | SURF1    | 7.608732401 | Tumor_G3 |
| 15697 | ATP6V1E1 | 6.797003488 | Tumor_G3 |
| 15698 | DLAT     | 3.476044288 | Tumor_G3 |
| 15699 | PDC      | 0           | Tumor_G3 |
| 15700 | SUCLG2   | 5.427961038 | Tumor_G3 |
| 15701 | SLC25A5  | 6.862065086 | Tumor_G3 |
| 15702 | UCP2     | 7.967512501 | Tumor_G3 |
| 15703 | SOD2     | 3.985570208 | Tumor_G3 |
| 15704 | NOX4     | 3.280429079 | Tumor_G3 |
| 15705 | DUOX1    | 5.443544466 | Tumor_G3 |
| 15706 | DUOXA1   | 6.687449642 | Tumor_G3 |
| 15707 | DUOX2    | 4.895039921 | Tumor_G3 |
| 15708 | DUOXA2   | 4.880067634 | Tumor_G3 |
| 15709 | NDUFA1   | 8.619878831 | Tumor_G3 |
| 15710 | NDUFA2   | 7.49350504  | Tumor_G3 |
| 15711 | NDUFA8   | 7.650292105 | Tumor_G3 |
| 15712 | NDUFB1   | 6.746193627 | Tumor_G3 |
| 15713 | NDUFB10  | 8.103465459 | Tumor_G3 |
| 15714 | NDUFB2   | 7.13508756  | Tumor_G3 |
| 15715 | NDUFB3   | 6.496136476 | Tumor_G3 |
| 15716 | NDUFB7   | 9.331099993 | Tumor_G3 |
| 15717 | CYC1     | 7.696578669 | Tumor_G3 |
| 15718 | ETFB     | 5.784493458 | Tumor_G3 |

|       |          |             |          |
|-------|----------|-------------|----------|
| 15719 | UQCR10   | 7.90015084  | Tumor_G3 |
| 15720 | UQCRQ    | 8.116059545 | Tumor_G3 |
| 15721 | UQCC3    | 5.69092777  | Tumor_G3 |
| 15722 | COX15    | 5.214826558 | Tumor_G3 |
| 15723 | COX5A    | 7.893536443 | Tumor_G3 |
| 15724 | COX6B1   | 9.283264617 | Tumor_G3 |
| 15725 | COX6C    | 7.195319089 | Tumor_G3 |
| 15726 | COX7A2   | 7.407542918 | Tumor_G3 |
| 15727 | COX7B    | 6.480799024 | Tumor_G3 |
| 15728 | COX8A    | 10.7881778  | Tumor_G3 |
| 15729 | SCO1     | 3.887605482 | Tumor_G3 |
| 15730 | SURF1    | 7.036493033 | Tumor_G3 |
| 15731 | ATP6V1E1 | 6.894539527 | Tumor_G3 |
| 15732 | DLAT     | 4.982192786 | Tumor_G3 |
| 15733 | PDC      | 0.173715378 | Tumor_G3 |
| 15734 | SUCLG2   | 6.567119011 | Tumor_G3 |
| 15735 | SLC25A5  | 8.468512332 | Tumor_G3 |
| 15736 | UCP2     | 7.303883091 | Tumor_G3 |
| 15737 | SOD2     | 3.817741809 | Tumor_G3 |
| 15738 | NOX4     | 1.555500098 | Tumor_G3 |
| 15739 | DUOX1    | 8.278584759 | Tumor_G3 |
| 15740 | DUOXA1   | 7.843582516 | Tumor_G3 |
| 15741 | DUOX2    | 8.80658454  | Tumor_G3 |
| 15742 | DUOXA2   | 7.554693751 | Tumor_G3 |
| 15743 | NDUFA1   | 8.804528787 | Tumor_G3 |
| 15744 | NDUFA2   | 7.863727166 | Tumor_G3 |
| 15745 | NDUFA8   | 7.654577167 | Tumor_G3 |
| 15746 | NDUFB1   | 6.578366752 | Tumor_G3 |
| 15747 | NDUFB10  | 8.643377417 | Tumor_G3 |
| 15748 | NDUFB2   | 7.075805943 | Tumor_G3 |
| 15749 | NDUFB3   | 6.447828423 | Tumor_G3 |
| 15750 | NDUFB7   | 9.973245943 | Tumor_G3 |
| 15751 | CYC1     | 7.097226167 | Tumor_G3 |
| 15752 | ETFB     | 5.650383245 | Tumor_G3 |
| 15753 | UQCR10   | 8.50975083  | Tumor_G3 |
| 15754 | UQCRQ    | 8.202644454 | Tumor_G3 |
| 15755 | UQCC3    | 5.531708713 | Tumor_G3 |
| 15756 | COX15    | 4.397529376 | Tumor_G3 |
| 15757 | COX5A    | 7.583353146 | Tumor_G3 |
| 15758 | COX6B1   | 9.772670194 | Tumor_G3 |

|       |          |             |          |
|-------|----------|-------------|----------|
| 15759 | COX6C    | 6.933327184 | Tumor_G3 |
| 15760 | COX7A2   | 7.2919631   | Tumor_G3 |
| 15761 | COX7B    | 6.580834298 | Tumor_G3 |
| 15762 | COX8A    | 10.07476065 | Tumor_G3 |
| 15763 | SCO1     | 2.604331702 | Tumor_G3 |
| 15764 | SURF1    | 7.350829675 | Tumor_G3 |
| 15765 | ATP6V1E1 | 7.034972643 | Tumor_G3 |
| 15766 | DLAT     | 4.081492778 | Tumor_G3 |
| 15767 | PDC      | 0.078632971 | Tumor_G3 |
| 15768 | SUCLG2   | 5.699083419 | Tumor_G3 |
| 15769 | SLC25A5  | 7.605236831 | Tumor_G3 |
| 15770 | UCP2     | 8.661358061 | Tumor_G3 |
| 15771 | SOD2     | 4.084518432 | Tumor_G3 |
| 15772 | NOX4     | 2.401050756 | Tumor_G3 |
| 15773 | DUOX1    | 5.946888829 | Tumor_G3 |
| 15774 | DUOXA1   | 6.61023239  | Tumor_G3 |
| 15775 | DUOX2    | 6.854042903 | Tumor_G3 |
| 15776 | DUOXA2   | 6.556535582 | Tumor_G3 |
| 15777 | NDUFA1   | 8.709566885 | Tumor_G3 |
| 15778 | NDUFA2   | 7.497251315 | Tumor_G3 |
| 15779 | NDUFA8   | 7.586810836 | Tumor_G3 |
| 15780 | NDUFB1   | 6.565302662 | Tumor_G3 |
| 15781 | NDUFB10  | 8.660641959 | Tumor_G3 |
| 15782 | NDUFB2   | 7.34828761  | Tumor_G3 |
| 15783 | NDUFB3   | 6.688332073 | Tumor_G3 |
| 15784 | NDUFB7   | 10.12396066 | Tumor_G3 |
| 15785 | CYC1     | 7.56795339  | Tumor_G3 |
| 15786 | ETFB     | 6.564580535 | Tumor_G3 |
| 15787 | UQCR10   | 8.435365252 | Tumor_G3 |
| 15788 | UQCRQ    | 8.29803121  | Tumor_G3 |
| 15789 | UQCC3    | 5.880790829 | Tumor_G3 |
| 15790 | COX15    | 4.552374417 | Tumor_G3 |
| 15791 | COX5A    | 7.456112637 | Tumor_G3 |
| 15792 | COX6B1   | 9.668060356 | Tumor_G3 |
| 15793 | COX6C    | 7.199845691 | Tumor_G3 |
| 15794 | COX7A2   | 7.589271821 | Tumor_G3 |
| 15795 | COX7B    | 6.447859373 | Tumor_G3 |
| 15796 | COX8A    | 10.516254   | Tumor_G3 |
| 15797 | SCO1     | 2.656532711 | Tumor_G3 |
| 15798 | SURF1    | 7.430785858 | Tumor_G3 |

|       |          |             |          |
|-------|----------|-------------|----------|
| 15799 | ATP6V1E1 | 7.067349539 | Tumor_G3 |
| 15800 | DLAT     | 4.000024921 | Tumor_G3 |
| 15801 | PDC      | 0.05495034  | Tumor_G3 |
| 15802 | SUCLG2   | 5.249643888 | Tumor_G3 |
| 15803 | SLC25A5  | 7.918862939 | Tumor_G3 |
| 15804 | UCP2     | 9.223406427 | Tumor_G3 |
| 15805 | SOD2     | 4.128631055 | Tumor_G3 |
| 15806 | NOX4     | 1.928120775 | Tumor_G3 |
| 15807 | DUOX1    | 6.720229834 | Tumor_G3 |
| 15808 | DUOXA1   | 7.392112585 | Tumor_G3 |
| 15809 | DUOX2    | 6.531362418 | Tumor_G3 |
| 15810 | DUOXA2   | 5.694422375 | Tumor_G3 |
| 15811 | NDUFA1   | 8.437211146 | Tumor_G3 |
| 15812 | NDUFA2   | 8.528677483 | Tumor_G3 |
| 15813 | NDUFA8   | 7.24061662  | Tumor_G3 |
| 15814 | NDUFB1   | 7.361432083 | Tumor_G3 |
| 15815 | NDUFB10  | 8.971410197 | Tumor_G3 |
| 15816 | NDUFB2   | 7.657688403 | Tumor_G3 |
| 15817 | NDUFB3   | 6.596614701 | Tumor_G3 |
| 15818 | NDUFB7   | 10.6153305  | Tumor_G3 |
| 15819 | CYC1     | 8.166398811 | Tumor_G3 |
| 15820 | ETFB     | 6.721779586 | Tumor_G3 |
| 15821 | UQCR10   | 8.333160147 | Tumor_G3 |
| 15822 | UQCRQ    | 9.041059843 | Tumor_G3 |
| 15823 | UQCC3    | 5.206846138 | Tumor_G3 |
| 15824 | COX15    | 4.285284237 | Tumor_G3 |
| 15825 | COX5A    | 7.666248698 | Tumor_G3 |
| 15826 | COX6B1   | 10.55241784 | Tumor_G3 |
| 15827 | COX6C    | 7.709323429 | Tumor_G3 |
| 15828 | COX7A2   | 7.719244076 | Tumor_G3 |
| 15829 | COX7B    | 6.105267142 | Tumor_G3 |
| 15830 | COX8A    | 10.25695879 | Tumor_G3 |
| 15831 | SCO1     | 3.600394223 | Tumor_G3 |
| 15832 | SURF1    | 7.584708026 | Tumor_G3 |
| 15833 | ATP6V1E1 | 6.43553524  | Tumor_G3 |
| 15834 | DLAT     | 3.612706823 | Tumor_G3 |
| 15835 | PDC      | 0.060961191 | Tumor_G3 |
| 15836 | SUCLG2   | 6.020735575 | Tumor_G3 |
| 15837 | SLC25A5  | 8.622844127 | Tumor_G3 |
| 15838 | UCP2     | 8.066569051 | Tumor_G3 |

|       |          |             |          |
|-------|----------|-------------|----------|
| 15839 | SOD2     | 3.039238318 | Tumor_G3 |
| 15840 | NOX4     | 1.374450597 | Tumor_G3 |
| 15841 | DUOX1    | 6.634394652 | Tumor_G3 |
| 15842 | DUOXA1   | 6.593414474 | Tumor_G3 |
| 15843 | DUOX2    | 8.463907166 | Tumor_G3 |
| 15844 | DUOXA2   | 7.245532164 | Tumor_G3 |
| 15845 | NDUFA1   | 9.051652598 | Tumor_G3 |
| 15846 | NDUFA2   | 7.874925271 | Tumor_G3 |
| 15847 | NDUFA8   | 7.711790189 | Tumor_G3 |
| 15848 | NDUFB1   | 6.45852852  | Tumor_G3 |
| 15849 | NDUFB10  | 8.067142222 | Tumor_G3 |
| 15850 | NDUFB2   | 7.700585741 | Tumor_G3 |
| 15851 | NDUFB3   | 6.422774704 | Tumor_G3 |
| 15852 | NDUFB7   | 9.96196867  | Tumor_G3 |
| 15853 | CYC1     | 7.718019822 | Tumor_G3 |
| 15854 | ETFB     | 6.270333396 | Tumor_G3 |
| 15855 | UQCR10   | 8.848476172 | Tumor_G3 |
| 15856 | UQCRQ    | 7.95957007  | Tumor_G3 |
| 15857 | UQCC3    | 5.37740759  | Tumor_G3 |
| 15858 | COX15    | 5.08728386  | Tumor_G3 |
| 15859 | COX5A    | 6.916586899 | Tumor_G3 |
| 15860 | COX6B1   | 9.290659427 | Tumor_G3 |
| 15861 | COX6C    | 7.143334884 | Tumor_G3 |
| 15862 | COX7A2   | 6.390008242 | Tumor_G3 |
| 15863 | COX7B    | 6.573387776 | Tumor_G3 |
| 15864 | COX8A    | 10.50479889 | Tumor_G3 |
| 15865 | SCO1     | 3.361770574 | Tumor_G3 |
| 15866 | SURF1    | 7.186042874 | Tumor_G3 |
| 15867 | ATP6V1E1 | 7.082683648 | Tumor_G3 |
| 15868 | DLAT     | 4.808504254 | Tumor_G3 |
| 15869 | PDC      | 0.081952836 | Tumor_G3 |
| 15870 | SUCLG2   | 6.460303071 | Tumor_G3 |
| 15871 | SLC25A5  | 8.137521464 | Tumor_G3 |
| 15872 | UCP2     | 8.363211574 | Tumor_G3 |
| 15873 | SOD2     | 3.460104242 | Tumor_G3 |
| 15874 | NOX4     | 1.081994398 | Tumor_G3 |
| 15875 | DUOX1    | 6.994379365 | Tumor_G3 |
| 15876 | DUOXA1   | 6.198869867 | Tumor_G3 |
| 15877 | DUOX2    | 8.732018283 | Tumor_G3 |
| 15878 | DUOXA2   | 8.025263409 | Tumor_G3 |

|       |          |             |          |
|-------|----------|-------------|----------|
| 15879 | NDUFA1   | 8.963962498 | Tumor_G3 |
| 15880 | NDUFA2   | 8.773242545 | Tumor_G3 |
| 15881 | NDUFA8   | 7.9151609   | Tumor_G3 |
| 15882 | NDUFB1   | 7.92605125  | Tumor_G3 |
| 15883 | NDUFB10  | 8.886187353 | Tumor_G3 |
| 15884 | NDUFB2   | 7.596333185 | Tumor_G3 |
| 15885 | NDUFB3   | 6.257018319 | Tumor_G3 |
| 15886 | NDUFB7   | 11.16564884 | Tumor_G3 |
| 15887 | CYC1     | 6.306011938 | Tumor_G3 |
| 15888 | ETFB     | 7.694333582 | Tumor_G3 |
| 15889 | UQCR10   | 9.681908835 | Tumor_G3 |
| 15890 | UQCRQ    | 8.916186953 | Tumor_G3 |
| 15891 | UQCC3    | 6.411597083 | Tumor_G3 |
| 15892 | COX15    | 4.86438067  | Tumor_G3 |
| 15893 | COX5A    | 7.398735737 | Tumor_G3 |
| 15894 | COX6B1   | 10.96996966 | Tumor_G3 |
| 15895 | COX6C    | 8.012219463 | Tumor_G3 |
| 15896 | COX7A2   | 5.698510327 | Tumor_G3 |
| 15897 | COX7B    | 7.41768736  | Tumor_G3 |
| 15898 | COX8A    | 11.51883855 | Tumor_G3 |
| 15899 | SCO1     | 2.594860653 | Tumor_G3 |
| 15900 | SURF1    | 7.844244868 | Tumor_G3 |
| 15901 | ATP6V1E1 | 6.643729534 | Tumor_G3 |
| 15902 | DLAT     | 3.183864241 | Tumor_G3 |
| 15903 | PDC      | 0           | Tumor_G3 |
| 15904 | SUCLG2   | 4.217984383 | Tumor_G3 |
| 15905 | SLC25A5  | 4.950938925 | Tumor_G3 |
| 15906 | UCP2     | 8.101023883 | Tumor_G3 |
| 15907 | SOD2     | 2.908927514 | Tumor_G3 |
| 15908 | NOX4     | 1.587035317 | Tumor_G3 |
| 15909 | DUOX1    | 7.421717439 | Tumor_G3 |
| 15910 | DUOXA1   | 6.683580771 | Tumor_G3 |
| 15911 | DUOX2    | 8.293745274 | Tumor_G3 |
| 15912 | DUOXA2   | 8.730544708 | Tumor_G3 |
| 15913 | NDUFA1   | 8.262577638 | Tumor_G3 |
| 15914 | NDUFA2   | 8.47281946  | Tumor_G3 |
| 15915 | NDUFA8   | 7.320567684 | Tumor_G3 |
| 15916 | NDUFB1   | 6.980104863 | Tumor_G3 |
| 15917 | NDUFB10  | 8.780589458 | Tumor_G3 |
| 15918 | NDUFB2   | 7.346725779 | Tumor_G3 |

|       |          |             |          |
|-------|----------|-------------|----------|
| 15919 | NDUFB3   | 6.022670767 | Tumor_G3 |
| 15920 | NDUFB7   | 10.49499168 | Tumor_G3 |
| 15921 | CYC1     | 6.056396001 | Tumor_G3 |
| 15922 | ETFB     | 7.170447908 | Tumor_G3 |
| 15923 | UQCR10   | 8.24933041  | Tumor_G3 |
| 15924 | UQCRQ    | 7.874140237 | Tumor_G3 |
| 15925 | UQCC3    | 6.428107359 | Tumor_G3 |
| 15926 | COX15    | 4.461703986 | Tumor_G3 |
| 15927 | COX5A    | 6.167104176 | Tumor_G3 |
| 15928 | COX6B1   | 10.34010546 | Tumor_G3 |
| 15929 | COX6C    | 6.94593747  | Tumor_G3 |
| 15930 | COX7A2   | 5.4689216   | Tumor_G3 |
| 15931 | COX7B    | 6.828438505 | Tumor_G3 |
| 15932 | COX8A    | 11.55495157 | Tumor_G3 |
| 15933 | SCO1     | 3.08254724  | Tumor_G3 |
| 15934 | SURF1    | 7.519405936 | Tumor_G3 |
| 15935 | ATP6V1E1 | 6.593333095 | Tumor_G3 |
| 15936 | DLAT     | 3.751465907 | Tumor_G3 |
| 15937 | PDC      | 0           | Tumor_G3 |
| 15938 | SUCLG2   | 4.057967519 | Tumor_G3 |
| 15939 | SLC25A5  | 4.960425813 | Tumor_G3 |
| 15940 | UCP2     | 8.615153841 | Tumor_G3 |
| 15941 | SOD2     | 2.607281997 | Tumor_G3 |
| 15942 | NOX4     | 1.357754166 | Tumor_G3 |
| 15943 | DUOX1    | 7.481256565 | Tumor_G3 |
| 15944 | DUOXA1   | 7.51693783  | Tumor_G3 |
| 15945 | DUOX2    | 8.153339182 | Tumor_G3 |
| 15946 | DUOXA2   | 7.974949925 | Tumor_G3 |
| 15947 | NDUFA1   | 8.807141649 | Tumor_G3 |
| 15948 | NDUFA2   | 7.202194899 | Tumor_G3 |
| 15949 | NDUFA8   | 7.839599985 | Tumor_G3 |
| 15950 | NDUFB1   | 6.224437415 | Tumor_G3 |
| 15951 | NDUFB10  | 8.19606895  | Tumor_G3 |
| 15952 | NDUFB2   | 7.720313988 | Tumor_G3 |
| 15953 | NDUFB3   | 6.931874185 | Tumor_G3 |
| 15954 | NDUFB7   | 9.09124687  | Tumor_G3 |
| 15955 | CYC1     | 8.124150965 | Tumor_G3 |
| 15956 | ETFB     | 5.583980422 | Tumor_G3 |
| 15957 | UQCR10   | 8.115825686 | Tumor_G3 |
| 15958 | UQCRQ    | 7.806051752 | Tumor_G3 |

|       |          |             |          |
|-------|----------|-------------|----------|
| 15959 | UQCC3    | 4.950326699 | Tumor_G3 |
| 15960 | COX15    | 5.774821838 | Tumor_G3 |
| 15961 | COX5A    | 8.399757619 | Tumor_G3 |
| 15962 | COX6B1   | 9.389421316 | Tumor_G3 |
| 15963 | COX6C    | 7.368813222 | Tumor_G3 |
| 15964 | COX7A2   | 7.771411887 | Tumor_G3 |
| 15965 | COX7B    | 7.347841864 | Tumor_G3 |
| 15966 | COX8A    | 10.61927796 | Tumor_G3 |
| 15967 | SCO1     | 4.236664048 | Tumor_G3 |
| 15968 | SURF1    | 7.46366135  | Tumor_G3 |
| 15969 | ATP6V1E1 | 7.565909816 | Tumor_G3 |
| 15970 | DLAT     | 5.924219367 | Tumor_G3 |
| 15971 | PDC      | 0.11589913  | Tumor_G3 |
| 15972 | SUCLG2   | 7.460679994 | Tumor_G3 |
| 15973 | SLC25A5  | 9.883771735 | Tumor_G3 |
| 15974 | UCP2     | 5.0619941   | Tumor_G3 |
| 15975 | SOD2     | 5.34579638  | Tumor_G3 |
| 15976 | NOX4     | 1.564049319 | Tumor_G3 |
| 15977 | DUOX1    | 6.427552906 | Tumor_G3 |
| 15978 | DUOXA1   | 6.241300126 | Tumor_G3 |
| 15979 | DUOX2    | 8.000103427 | Tumor_G3 |
| 15980 | DUOXA2   | 5.958859257 | Tumor_G3 |
| 15981 | NDUFA1   | 8.504674977 | Tumor_G3 |
| 15982 | NDUFA2   | 7.948774791 | Tumor_G3 |
| 15983 | NDUFA8   | 7.256421915 | Tumor_G3 |
| 15984 | NDUFB1   | 7.245665926 | Tumor_G3 |
| 15985 | NDUFB10  | 8.177695421 | Tumor_G3 |
| 15986 | NDUFB2   | 7.993979729 | Tumor_G3 |
| 15987 | NDUFB3   | 6.731685812 | Tumor_G3 |
| 15988 | NDUFB7   | 9.650572121 | Tumor_G3 |
| 15989 | CYC1     | 7.271630816 | Tumor_G3 |
| 15990 | ETFB     | 6.204761697 | Tumor_G3 |
| 15991 | UQCR10   | 8.278974263 | Tumor_G3 |
| 15992 | UQCRQ    | 8.055956235 | Tumor_G3 |
| 15993 | UQCC3    | 5.115674777 | Tumor_G3 |
| 15994 | COX15    | 5.314975933 | Tumor_G3 |
| 15995 | COX5A    | 7.039201825 | Tumor_G3 |
| 15996 | COX6B1   | 8.771517993 | Tumor_G3 |
| 15997 | COX6C    | 6.758930399 | Tumor_G3 |
| 15998 | COX7A2   | 7.150179872 | Tumor_G3 |



|       |          |             |          |
|-------|----------|-------------|----------|
| 15999 | COX7B    | 5.876546144 | Tumor_G3 |
| 16000 | COX8A    | 9.684979477 | Tumor_G3 |
| 16001 | SCO1     | 4.044979597 | Tumor_G3 |
| 16002 | SURF1    | 7.401420191 | Tumor_G3 |
| 16003 | ATP6V1E1 | 6.869906721 | Tumor_G3 |
| 16004 | DLAT     | 4.76719277  | Tumor_G3 |
| 16005 | PDC      | 0           | Tumor_G3 |
| 16006 | SUCLG2   | 5.724257383 | Tumor_G3 |
| 16007 | SLC25A5  | 7.919928023 | Tumor_G3 |
| 16008 | UCP2     | 7.641935599 | Tumor_G3 |
| 16009 | SOD2     | 3.819832582 | Tumor_G3 |
| 16010 | NOX4     | 1.4449707   | Tumor_G3 |
| 16011 | DUOX1    | 6.438165986 | Tumor_G3 |
| 16012 | DUOXA1   | 6.167788205 | Tumor_G3 |
| 16013 | DUOX2    | 6.929867233 | Tumor_G3 |
| 16014 | DUOXA2   | 7.953674618 | Tumor_G3 |
| 16015 | NDUFA1   | 9.086363538 | Tumor_G3 |
| 16016 | NDUFA2   | 7.320352562 | Tumor_G3 |
| 16017 | NDUFA8   | 7.783075216 | Tumor_G3 |
| 16018 | NDUFB1   | 6.462413653 | Tumor_G3 |
| 16019 | NDUFB10  | 7.737991069 | Tumor_G3 |
| 16020 | NDUFB2   | 7.20482986  | Tumor_G3 |
| 16021 | NDUFB3   | 7.272076848 | Tumor_G3 |
| 16022 | NDUFB7   | 8.596318485 | Tumor_G3 |
| 16023 | CYC1     | 8.125043425 | Tumor_G3 |
| 16024 | ETFB     | 6.042427345 | Tumor_G3 |
| 16025 | UQCR10   | 8.452959728 | Tumor_G3 |
| 16026 | UQCRQ    | 7.885355928 | Tumor_G3 |
| 16027 | UQCC3    | 4.711347544 | Tumor_G3 |
| 16028 | COX15    | 5.189888533 | Tumor_G3 |
| 16029 | COX5A    | 8.272133067 | Tumor_G3 |
| 16030 | COX6B1   | 9.151922479 | Tumor_G3 |
| 16031 | COX6C    | 7.497492596 | Tumor_G3 |
| 16032 | COX7A2   | 7.834461607 | Tumor_G3 |
| 16033 | COX7B    | 7.411206541 | Tumor_G3 |
| 16034 | COX8A    | 10.23118854 | Tumor_G3 |
| 16035 | SCO1     | 3.920530701 | Tumor_G3 |
| 16036 | SURF1    | 6.455965295 | Tumor_G3 |
| 16037 | ATP6V1E1 | 7.065178708 | Tumor_G3 |
| 16038 | DLAT     | 5.720226535 | Tumor_G3 |

|       |          |             |          |
|-------|----------|-------------|----------|
| 16039 | PDC      | 0.06145207  | Tumor_G3 |
| 16040 | SUCLG2   | 7.016484013 | Tumor_G3 |
| 16041 | SLC25A5  | 9.122906501 | Tumor_G3 |
| 16042 | UCP2     | 8.450212171 | Tumor_G3 |
| 16043 | SOD2     | 5.105290259 | Tumor_G3 |
| 16044 | NOX4     | 2.238228036 | Tumor_G3 |
| 16045 | DUOX1    | 7.538932269 | Tumor_G3 |
| 16046 | DUOXA1   | 6.147116227 | Tumor_G3 |
| 16047 | DUOX2    | 7.387054513 | Tumor_G3 |
| 16048 | DUOXA2   | 7.947995369 | Tumor_G3 |
| 16049 | NDUFA1   | 9.312658127 | Tumor_G3 |
| 16050 | NDUFA2   | 7.424904809 | Tumor_G3 |
| 16051 | NDUFA8   | 8.162854806 | Tumor_G3 |
| 16052 | NDUFB1   | 6.998176912 | Tumor_G3 |
| 16053 | NDUFB10  | 8.31524959  | Tumor_G3 |
| 16054 | NDUFB2   | 7.995968883 | Tumor_G3 |
| 16055 | NDUFB3   | 7.267510251 | Tumor_G3 |
| 16056 | NDUFB7   | 9.510042768 | Tumor_G3 |
| 16057 | CYC1     | 7.91267196  | Tumor_G3 |
| 16058 | ETFB     | 5.45791978  | Tumor_G3 |
| 16059 | UQCR10   | 9.223366626 | Tumor_G3 |
| 16060 | UQCRQ    | 8.239271852 | Tumor_G3 |
| 16061 | UQCC3    | 4.894485396 | Tumor_G3 |
| 16062 | COX15    | 5.08210645  | Tumor_G3 |
| 16063 | COX5A    | 8.148461541 | Tumor_G3 |
| 16064 | COX6B1   | 9.714945374 | Tumor_G3 |
| 16065 | COX6C    | 7.710243628 | Tumor_G3 |
| 16066 | COX7A2   | 7.601024324 | Tumor_G3 |
| 16067 | COX7B    | 7.553409769 | Tumor_G3 |
| 16068 | COX8A    | 10.38943733 | Tumor_G3 |
| 16069 | SCO1     | 4.052987917 | Tumor_G3 |
| 16070 | SURF1    | 6.857091875 | Tumor_G3 |
| 16071 | ATP6V1E1 | 6.750621425 | Tumor_G3 |
| 16072 | DLAT     | 5.733177447 | Tumor_G3 |
| 16073 | PDC      | 0.137952849 | Tumor_G3 |
| 16074 | SUCLG2   | 6.296999349 | Tumor_G3 |
| 16075 | SLC25A5  | 8.90815862  | Tumor_G3 |
| 16076 | UCP2     | 5.113568467 | Tumor_G3 |
| 16077 | SOD2     | 5.095471079 | Tumor_G3 |
| 16078 | NOX4     | 1.897501236 | Tumor_G3 |

|       |          |             |          |
|-------|----------|-------------|----------|
| 16079 | DUOX1    | 7.225893022 | Tumor_G3 |
| 16080 | DUOXA1   | 6.59129154  | Tumor_G3 |
| 16081 | DUOX2    | 7.782309269 | Tumor_G3 |
| 16082 | DUOXA2   | 6.83311544  | Tumor_G3 |
| 16083 | NDUFA1   | 8.617255062 | Tumor_G3 |
| 16084 | NDUFA2   | 7.393850226 | Tumor_G3 |
| 16085 | NDUFA8   | 7.384821408 | Tumor_G3 |
| 16086 | NDUFB1   | 6.485322042 | Tumor_G3 |
| 16087 | NDUFB10  | 7.840654273 | Tumor_G3 |
| 16088 | NDUFB2   | 6.742574323 | Tumor_G3 |
| 16089 | NDUFB3   | 6.444150585 | Tumor_G3 |
| 16090 | NDUFB7   | 9.493603448 | Tumor_G3 |
| 16091 | CYC1     | 7.192855843 | Tumor_G3 |
| 16092 | ETFB     | 5.716117523 | Tumor_G3 |
| 16093 | UQCR10   | 8.196178399 | Tumor_G3 |
| 16094 | UQCRQ    | 7.824752789 | Tumor_G3 |
| 16095 | UQCC3    | 5.079079402 | Tumor_G3 |
| 16096 | COX15    | 4.677551022 | Tumor_G3 |
| 16097 | COX5A    | 7.093734313 | Tumor_G3 |
| 16098 | COX6B1   | 9.183061798 | Tumor_G3 |
| 16099 | COX6C    | 7.02443519  | Tumor_G3 |
| 16100 | COX7A2   | 7.304856537 | Tumor_G3 |
| 16101 | COX7B    | 6.402019064 | Tumor_G3 |
| 16102 | COX8A    | 9.891761673 | Tumor_G3 |
| 16103 | SCO1     | 3.020358825 | Tumor_G3 |
| 16104 | SURF1    | 6.818000492 | Tumor_G3 |
| 16105 | ATP6V1E1 | 7.08035189  | Tumor_G3 |
| 16106 | DLAT     | 4.586231773 | Tumor_G3 |
| 16107 | PDC      | 0           | Tumor_G3 |
| 16108 | SUCLG2   | 5.755343693 | Tumor_G3 |
| 16109 | SLC25A5  | 7.771519147 | Tumor_G3 |
| 16110 | UCP2     | 8.000503991 | Tumor_G3 |
| 16111 | SOD2     | 4.45582107  | Tumor_G3 |
| 16112 | NOX4     | 1.574096605 | Tumor_G3 |
| 16113 | DUOX1    | 7.43077218  | Tumor_G3 |
| 16114 | DUOXA1   | 7.488398624 | Tumor_G3 |
| 16115 | DUOX2    | 7.247094318 | Tumor_G3 |
| 16116 | DUOXA2   | 5.101082059 | Tumor_G3 |
| 16117 | NDUFA1   | 9.083521052 | Tumor_G3 |
| 16118 | NDUFA2   | 7.074309892 | Tumor_G3 |

|       |          |             |          |
|-------|----------|-------------|----------|
| 16119 | NDUFA8   | 7.851534836 | Tumor_G3 |
| 16120 | NDUFB1   | 6.696397724 | Tumor_G3 |
| 16121 | NDUFB10  | 7.726710153 | Tumor_G3 |
| 16122 | NDUFB2   | 7.85020638  | Tumor_G3 |
| 16123 | NDUFB3   | 7.328477897 | Tumor_G3 |
| 16124 | NDUFB7   | 9.457961822 | Tumor_G3 |
| 16125 | CYC1     | 7.998906232 | Tumor_G3 |
| 16126 | ETFB     | 5.256821694 | Tumor_G3 |
| 16127 | UQCR10   | 8.457623118 | Tumor_G3 |
| 16128 | UQCRQ    | 7.796127338 | Tumor_G3 |
| 16129 | UQCC3    | 4.542517171 | Tumor_G3 |
| 16130 | COX15    | 5.12429635  | Tumor_G3 |
| 16131 | COX5A    | 8.036554394 | Tumor_G3 |
| 16132 | COX6B1   | 9.132212272 | Tumor_G3 |
| 16133 | COX6C    | 7.287983131 | Tumor_G3 |
| 16134 | COX7A2   | 7.648065463 | Tumor_G3 |
| 16135 | COX7B    | 7.247745084 | Tumor_G3 |
| 16136 | COX8A    | 10.56776716 | Tumor_G3 |
| 16137 | SCO1     | 3.710440287 | Tumor_G3 |
| 16138 | SURF1    | 6.381951978 | Tumor_G3 |
| 16139 | ATP6V1E1 | 7.32668045  | Tumor_G3 |
| 16140 | DLAT     | 5.635968386 | Tumor_G3 |
| 16141 | PDC      | 0           | Tumor_G3 |
| 16142 | SUCLG2   | 6.884732401 | Tumor_G3 |
| 16143 | SLC25A5  | 9.375719238 | Tumor_G3 |
| 16144 | UCP2     | 7.238975778 | Tumor_G3 |
| 16145 | SOD2     | 5.123195005 | Tumor_G3 |
| 16146 | NOX4     | 0.552993448 | Tumor_G3 |
| 16147 | DUOX1    | 5.798439541 | Tumor_G3 |
| 16148 | DUOXA1   | 5.726868124 | Tumor_G3 |
| 16149 | DUOX2    | 6.007919277 | Tumor_G3 |
| 16150 | DUOXA2   | 5.186024085 | Tumor_G3 |
| 16151 | NDUFA1   | 9.117844345 | Tumor_G3 |
| 16152 | NDUFA2   | 7.869552076 | Tumor_G3 |
| 16153 | NDUFA8   | 7.881842527 | Tumor_G3 |
| 16154 | NDUFB1   | 7.115284462 | Tumor_G3 |
| 16155 | NDUFB10  | 7.763179294 | Tumor_G3 |
| 16156 | NDUFB2   | 7.459942255 | Tumor_G3 |
| 16157 | NDUFB3   | 6.953029793 | Tumor_G3 |
| 16158 | NDUFB7   | 9.442452673 | Tumor_G3 |

|       |          |             |          |
|-------|----------|-------------|----------|
| 16159 | CYC1     | 6.777299893 | Tumor_G3 |
| 16160 | ETFB     | 5.00280057  | Tumor_G3 |
| 16161 | UQCR10   | 8.881838853 | Tumor_G3 |
| 16162 | UQCRQ    | 8.200384161 | Tumor_G3 |
| 16163 | UQCC3    | 4.475817542 | Tumor_G3 |
| 16164 | COX15    | 4.425925192 | Tumor_G3 |
| 16165 | COX5A    | 7.243223242 | Tumor_G3 |
| 16166 | COX6B1   | 9.678959448 | Tumor_G3 |
| 16167 | COX6C    | 7.475189043 | Tumor_G3 |
| 16168 | COX7A2   | 7.179084225 | Tumor_G3 |
| 16169 | COX7B    | 6.847144271 | Tumor_G3 |
| 16170 | COX8A    | 10.38365772 | Tumor_G3 |
| 16171 | SCO1     | 3.023745557 | Tumor_G3 |
| 16172 | SURF1    | 6.616008732 | Tumor_G3 |
| 16173 | ATP6V1E1 | 6.342665243 | Tumor_G3 |
| 16174 | DLAT     | 4.625280398 | Tumor_G3 |
| 16175 | PDC      | 0           | Tumor_G3 |
| 16176 | SUCLG2   | 5.999454455 | Tumor_G3 |
| 16177 | SLC25A5  | 7.695334745 | Tumor_G3 |
| 16178 | UCP2     | 7.834489362 | Tumor_G3 |
| 16179 | SOD2     | 3.951985707 | Tumor_G3 |
| 16180 | NOX4     | 1.556246267 | Tumor_G3 |
| 16181 | DUOX1    | 6.076749277 | Tumor_G3 |
| 16182 | DUOXA1   | 5.320847608 | Tumor_G3 |
| 16183 | DUOX2    | 6.182807427 | Tumor_G3 |
| 16184 | DUOXA2   | 4.694993849 | Tumor_G3 |
| 16185 | NDUFA1   | 8.937290451 | Tumor_G3 |
| 16186 | NDUFA2   | 7.561419023 | Tumor_G3 |
| 16187 | NDUFA8   | 8.042812635 | Tumor_G3 |
| 16188 | NDUFB1   | 6.876972586 | Tumor_G3 |
| 16189 | NDUFB10  | 8.111079285 | Tumor_G3 |
| 16190 | NDUFB2   | 7.283592363 | Tumor_G3 |
| 16191 | NDUFB3   | 7.12227918  | Tumor_G3 |
| 16192 | NDUFB7   | 9.36382563  | Tumor_G3 |
| 16193 | CYC1     | 6.800936852 | Tumor_G3 |
| 16194 | ETFB     | 5.639386096 | Tumor_G3 |
| 16195 | UQCR10   | 8.781268262 | Tumor_G3 |
| 16196 | UQCRQ    | 8.304655531 | Tumor_G3 |
| 16197 | UQCC3    | 5.048782187 | Tumor_G3 |
| 16198 | COX15    | 4.706731624 | Tumor_G3 |

|       |          |             |          |
|-------|----------|-------------|----------|
| 16199 | COX5A    | 8.24467878  | Tumor_G3 |
| 16200 | COX6B1   | 9.519081858 | Tumor_G3 |
| 16201 | COX6C    | 7.560805889 | Tumor_G3 |
| 16202 | COX7A2   | 7.595412717 | Tumor_G3 |
| 16203 | COX7B    | 7.304607326 | Tumor_G3 |
| 16204 | COX8A    | 10.73804776 | Tumor_G3 |
| 16205 | SCO1     | 3.316986528 | Tumor_G3 |
| 16206 | SURF1    | 6.93180068  | Tumor_G3 |
| 16207 | ATP6V1E1 | 6.55047412  | Tumor_G3 |
| 16208 | DLAT     | 5.167076326 | Tumor_G3 |
| 16209 | PDC      | 0.04735039  | Tumor_G3 |
| 16210 | SUCLG2   | 6.417025354 | Tumor_G3 |
| 16211 | SLC25A5  | 7.870922727 | Tumor_G3 |
| 16212 | UCP2     | 7.858235049 | Tumor_G3 |
| 16213 | SOD2     | 4.523291853 | Tumor_G3 |
| 16214 | NOX4     | 1.5817973   | Tumor_G3 |
| 16215 | DUOX1    | 8.193265182 | Tumor_G3 |
| 16216 | DUOXA1   | 7.352051225 | Tumor_G3 |
| 16217 | DUOX2    | 9.340134287 | Tumor_G3 |
| 16218 | DUOXA2   | 7.653762924 | Tumor_G3 |
| 16219 | NDUFA1   | 9.198860126 | Tumor_G3 |
| 16220 | NDUFA2   | 7.932082611 | Tumor_G3 |
| 16221 | NDUFA8   | 8.399105709 | Tumor_G3 |
| 16222 | NDUFB1   | 7.043849771 | Tumor_G3 |
| 16223 | NDUFB10  | 8.202334046 | Tumor_G3 |
| 16224 | NDUFB2   | 8.734702427 | Tumor_G3 |
| 16225 | NDUFB3   | 7.667024591 | Tumor_G3 |
| 16226 | NDUFB7   | 10.02532828 | Tumor_G3 |
| 16227 | CYC1     | 8.157868312 | Tumor_G3 |
| 16228 | ETFB     | 5.785845098 | Tumor_G3 |
| 16229 | UQCR10   | 9.200516063 | Tumor_G3 |
| 16230 | UQCRQ    | 8.572307085 | Tumor_G3 |
| 16231 | UQCC3    | 4.482795361 | Tumor_G3 |
| 16232 | COX15    | 5.226116871 | Tumor_G3 |
| 16233 | COX5A    | 7.959178956 | Tumor_G3 |
| 16234 | COX6B1   | 9.799900525 | Tumor_G3 |
| 16235 | COX6C    | 7.634242329 | Tumor_G3 |
| 16236 | COX7A2   | 8.112126176 | Tumor_G3 |
| 16237 | COX7B    | 7.880575235 | Tumor_G3 |
| 16238 | COX8A    | 10.94850241 | Tumor_G3 |

|       |          |             |          |
|-------|----------|-------------|----------|
| 16239 | SCO1     | 3.688673087 | Tumor_G3 |
| 16240 | SURF1    | 6.737726819 | Tumor_G3 |
| 16241 | ATP6V1E1 | 7.123752904 | Tumor_G3 |
| 16242 | DLAT     | 5.242424455 | Tumor_G3 |
| 16243 | PDC      | 0.105539507 | Tumor_G3 |
| 16244 | SUCLG2   | 6.794431968 | Tumor_G3 |
| 16245 | SLC25A5  | 8.695475779 | Tumor_G3 |
| 16246 | UCP2     | 9.38311066  | Tumor_G3 |
| 16247 | SOD2     | 4.069785152 | Tumor_G3 |
| 16248 | NOX4     | 2.05338746  | Tumor_G3 |
| 16249 | DUOX1    | 6.676196449 | Tumor_G3 |
| 16250 | DUOXA1   | 5.934895287 | Tumor_G3 |
| 16251 | DUOX2    | 7.234808904 | Tumor_G3 |
| 16252 | DUOXA2   | 6.495229884 | Tumor_G3 |
| 16253 | NDUFA1   | 8.956856547 | Tumor_G3 |
| 16254 | NDUFA2   | 7.536722283 | Tumor_G3 |
| 16255 | NDUFA8   | 8.123953072 | Tumor_G3 |
| 16256 | NDUFB1   | 6.526510579 | Tumor_G3 |
| 16257 | NDUFB10  | 8.288123071 | Tumor_G3 |
| 16258 | NDUFB2   | 8.08011647  | Tumor_G3 |
| 16259 | NDUFB3   | 7.260030436 | Tumor_G3 |
| 16260 | NDUFB7   | 9.510728727 | Tumor_G3 |
| 16261 | CYC1     | 8.136418603 | Tumor_G3 |
| 16262 | ETFB     | 5.138399249 | Tumor_G3 |
| 16263 | UQCR10   | 8.211595758 | Tumor_G3 |
| 16264 | UQCRQ    | 7.991902143 | Tumor_G3 |
| 16265 | UQCC3    | 5.437619359 | Tumor_G3 |
| 16266 | COX15    | 5.220926518 | Tumor_G3 |
| 16267 | COX5A    | 8.50149248  | Tumor_G3 |
| 16268 | COX6B1   | 9.34243436  | Tumor_G3 |
| 16269 | COX6C    | 7.407069693 | Tumor_G3 |
| 16270 | COX7A2   | 7.82188083  | Tumor_G3 |
| 16271 | COX7B    | 7.506807448 | Tumor_G3 |
| 16272 | COX8A    | 10.52324379 | Tumor_G3 |
| 16273 | SCO1     | 3.757657279 | Tumor_G3 |
| 16274 | SURF1    | 6.894061355 | Tumor_G3 |
| 16275 | ATP6V1E1 | 7.488236564 | Tumor_G3 |
| 16276 | DLAT     | 5.808351604 | Tumor_G3 |
| 16277 | PDC      | 0.054056827 | Tumor_G3 |
| 16278 | SUCLG2   | 6.391549726 | Tumor_G3 |

|       |          |             |          |
|-------|----------|-------------|----------|
| 16279 | SLC25A5  | 8.996472956 | Tumor_G3 |
| 16280 | UCP2     | 3.536708017 | Tumor_G3 |
| 16281 | SOD2     | 4.764310548 | Tumor_G3 |
| 16282 | NOX4     | 1.690004927 | Tumor_G3 |
| 16283 | DUOX1    | 6.421060401 | Tumor_G3 |
| 16284 | DUOXA1   | 5.895844485 | Tumor_G3 |
| 16285 | DUOX2    | 7.40620559  | Tumor_G3 |
| 16286 | DUOXA2   | 6.777576803 | Tumor_G3 |
| 16287 | NDUFA1   | 8.761663948 | Tumor_G3 |
| 16288 | NDUFA2   | 7.674142822 | Tumor_G3 |
| 16289 | NDUFA8   | 7.539572951 | Tumor_G3 |
| 16290 | NDUFB1   | 6.337714107 | Tumor_G3 |
| 16291 | NDUFB10  | 7.930805841 | Tumor_G3 |
| 16292 | NDUFB2   | 7.282394586 | Tumor_G3 |
| 16293 | NDUFB3   | 6.75673495  | Tumor_G3 |
| 16294 | NDUFB7   | 9.444574308 | Tumor_G3 |
| 16295 | CYC1     | 7.65125648  | Tumor_G3 |
| 16296 | ETFB     | 5.478830975 | Tumor_G3 |
| 16297 | UQCR10   | 8.377483377 | Tumor_G3 |
| 16298 | UQCRQ    | 8.065213992 | Tumor_G3 |
| 16299 | UQCC3    | 5.351495621 | Tumor_G3 |
| 16300 | COX15    | 5.112067864 | Tumor_G3 |
| 16301 | COX5A    | 7.630534509 | Tumor_G3 |
| 16302 | COX6B1   | 8.967112713 | Tumor_G3 |
| 16303 | COX6C    | 7.177758225 | Tumor_G3 |
| 16304 | COX7A2   | 7.550768266 | Tumor_G3 |
| 16305 | COX7B    | 6.541421949 | Tumor_G3 |
| 16306 | COX8A    | 10.39332873 | Tumor_G3 |
| 16307 | SCO1     | 4.04906953  | Tumor_G3 |
| 16308 | SURF1    | 7.516808834 | Tumor_G3 |
| 16309 | ATP6V1E1 | 6.682273023 | Tumor_G3 |
| 16310 | DLAT     | 5.035025711 | Tumor_G3 |
| 16311 | PDC      | 0.294192643 | Tumor_G3 |
| 16312 | SUCLG2   | 6.516029385 | Tumor_G3 |
| 16313 | SLC25A5  | 8.666952645 | Tumor_G3 |
| 16314 | UCP2     | 6.97718113  | Tumor_G3 |
| 16315 | SOD2     | 4.271633462 | Tumor_G3 |
| 16316 | NOX4     | 1.811098467 | Tumor_G3 |
| 16317 | DUOX1    | 7.872304036 | Tumor_G3 |
| 16318 | DUOXA1   | 7.618209072 | Tumor_G3 |



|       |          |             |          |
|-------|----------|-------------|----------|
| 16319 | DUOX2    | 8.760088448 | Tumor_G3 |
| 16320 | DUOXA2   | 6.905767859 | Tumor_G3 |
| 16321 | NDUFA1   | 9.102341021 | Tumor_G3 |
| 16322 | NDUFA2   | 7.963284657 | Tumor_G3 |
| 16323 | NDUFA8   | 8.250230864 | Tumor_G3 |
| 16324 | NDUFB1   | 7.315217807 | Tumor_G3 |
| 16325 | NDUFB10  | 8.569919414 | Tumor_G3 |
| 16326 | NDUFB2   | 7.372828118 | Tumor_G3 |
| 16327 | NDUFB3   | 6.866979003 | Tumor_G3 |
| 16328 | NDUFB7   | 10.05306496 | Tumor_G3 |
| 16329 | CYC1     | 7.37042212  | Tumor_G3 |
| 16330 | ETFB     | 5.662583392 | Tumor_G3 |
| 16331 | UQCR10   | 9.100301181 | Tumor_G3 |
| 16332 | UQCRQ    | 8.421502264 | Tumor_G3 |
| 16333 | UQCC3    | 5.426298004 | Tumor_G3 |
| 16334 | COX15    | 4.369763843 | Tumor_G3 |
| 16335 | COX5A    | 8.034673501 | Tumor_G3 |
| 16336 | COX6B1   | 10.43776068 | Tumor_G3 |
| 16337 | COX6C    | 8.145624524 | Tumor_G3 |
| 16338 | COX7A2   | 7.870647399 | Tumor_G3 |
| 16339 | COX7B    | 7.637271983 | Tumor_G3 |
| 16340 | COX8A    | 10.26568308 | Tumor_G3 |
| 16341 | SCO1     | 3.142602621 | Tumor_G3 |
| 16342 | SURF1    | 7.514654733 | Tumor_G3 |
| 16343 | ATP6V1E1 | 6.16731798  | Tumor_G3 |
| 16344 | DLAT     | 4.531015204 | Tumor_G3 |
| 16345 | PDC      | 0.06404782  | Tumor_G3 |
| 16346 | SUCLG2   | 5.589509648 | Tumor_G3 |
| 16347 | SLC25A5  | 7.698952609 | Tumor_G3 |
| 16348 | UCP2     | 8.197129216 | Tumor_G3 |
| 16349 | SOD2     | 3.828190612 | Tumor_G3 |
| 16350 | NOX4     | 1.52334061  | Tumor_G3 |
| 16351 | DUOX1    | 7.056131809 | Tumor_G3 |
| 16352 | DUOXA1   | 7.440561063 | Tumor_G3 |
| 16353 | DUOX2    | 7.760316999 | Tumor_G3 |
| 16354 | DUOXA2   | 6.51246046  | Tumor_G3 |
| 16355 | NDUFA1   | 8.52620053  | Tumor_G3 |
| 16356 | NDUFA2   | 7.533751314 | Tumor_G3 |
| 16357 | NDUFA8   | 7.375050795 | Tumor_G3 |
| 16358 | NDUFB1   | 6.279538858 | Tumor_G3 |

|       |          |             |          |
|-------|----------|-------------|----------|
| 16359 | NDUFB10  | 7.869193388 | Tumor_G3 |
| 16360 | NDUFB2   | 7.087094328 | Tumor_G3 |
| 16361 | NDUFB3   | 6.696941461 | Tumor_G3 |
| 16362 | NDUFB7   | 9.234583685 | Tumor_G3 |
| 16363 | CYC1     | 7.115631224 | Tumor_G3 |
| 16364 | ETFB     | 5.419976268 | Tumor_G3 |
| 16365 | UQCR10   | 8.1810959   | Tumor_G3 |
| 16366 | UQCRQ    | 8.00611584  | Tumor_G3 |
| 16367 | UQCC3    | 4.492889923 | Tumor_G3 |
| 16368 | COX15    | 4.138576676 | Tumor_G3 |
| 16369 | COX5A    | 7.470225383 | Tumor_G3 |
| 16370 | COX6B1   | 9.430018515 | Tumor_G3 |
| 16371 | COX6C    | 7.09099297  | Tumor_G3 |
| 16372 | COX7A2   | 7.631620722 | Tumor_G3 |
| 16373 | COX7B    | 6.600147642 | Tumor_G3 |
| 16374 | COX8A    | 9.385176818 | Tumor_G3 |
| 16375 | SCO1     | 2.73282641  | Tumor_G3 |
| 16376 | SURF1    | 6.824874235 | Tumor_G3 |
| 16377 | ATP6V1E1 | 7.414293671 | Tumor_G3 |
| 16378 | DLAT     | 4.26311475  | Tumor_G3 |
| 16379 | PDC      | 0           | Tumor_G3 |
| 16380 | SUCLG2   | 5.784671954 | Tumor_G3 |
| 16381 | SLC25A5  | 8.369282864 | Tumor_G3 |
| 16382 | UCP2     | 8.25693498  | Tumor_G3 |
| 16383 | SOD2     | 5.523631559 | Tumor_G3 |
| 16384 | NOX4     | 2.550904346 | Tumor_G3 |
| 16385 | DUOX1    | 5.040291973 | Tumor_G3 |
| 16386 | DUOXA1   | 5.639542207 | Tumor_G3 |
| 16387 | DUOX2    | 4.150588683 | Tumor_G3 |
| 16388 | DUOXA2   | 2.682014702 | Tumor_G3 |
| 16389 | NDUFA1   | 8.784479021 | Tumor_G3 |
| 16390 | NDUFA2   | 7.548014104 | Tumor_G3 |
| 16391 | NDUFA8   | 7.888985648 | Tumor_G3 |
| 16392 | NDUFB1   | 6.92213915  | Tumor_G3 |
| 16393 | NDUFB10  | 7.863808105 | Tumor_G3 |
| 16394 | NDUFB2   | 7.69397209  | Tumor_G3 |
| 16395 | NDUFB3   | 7.165791556 | Tumor_G3 |
| 16396 | NDUFB7   | 9.706919578 | Tumor_G3 |
| 16397 | CYC1     | 7.429195322 | Tumor_G3 |
| 16398 | ETFB     | 5.584371223 | Tumor_G3 |

|       |          |             |          |
|-------|----------|-------------|----------|
| 16399 | UQCR10   | 8.809176795 | Tumor_G3 |
| 16400 | UQCRQ    | 8.059005153 | Tumor_G3 |
| 16401 | UQCC3    | 4.887610036 | Tumor_G3 |
| 16402 | COX15    | 5.350676178 | Tumor_G3 |
| 16403 | COX5A    | 7.669656212 | Tumor_G3 |
| 16404 | COX6B1   | 9.344807111 | Tumor_G3 |
| 16405 | COX6C    | 7.262018232 | Tumor_G3 |
| 16406 | COX7A2   | 7.521303515 | Tumor_G3 |
| 16407 | COX7B    | 6.983523942 | Tumor_G3 |
| 16408 | COX8A    | 10.23544157 | Tumor_G3 |
| 16409 | SCO1     | 4.12216043  | Tumor_G3 |
| 16410 | SURF1    | 7.080575896 | Tumor_G3 |
| 16411 | ATP6V1E1 | 6.960722486 | Tumor_G3 |
| 16412 | DLAT     | 5.37526647  | Tumor_G3 |
| 16413 | PDC      | 0.144657909 | Tumor_G3 |
| 16414 | SUCLG2   | 6.840494192 | Tumor_G3 |
| 16415 | SLC25A5  | 8.396668821 | Tumor_G3 |
| 16416 | UCP2     | 7.039446731 | Tumor_G3 |
| 16417 | SOD2     | 4.769806938 | Tumor_G3 |
| 16418 | NOX4     | 2.034417927 | Tumor_G3 |
| 16419 | DUOX1    | 7.135437544 | Tumor_G3 |
| 16420 | DUOXA1   | 6.542061687 | Tumor_G3 |
| 16421 | DUOX2    | 7.359510457 | Tumor_G3 |
| 16422 | DUOXA2   | 7.084642787 | Tumor_G3 |
| 16423 | NDUFA1   | 8.447072671 | Tumor_G3 |
| 16424 | NDUFA2   | 7.322702079 | Tumor_G3 |
| 16425 | NDUFA8   | 8.254598017 | Tumor_G3 |
| 16426 | NDUFB1   | 6.155288134 | Tumor_G3 |
| 16427 | NDUFB10  | 8.338645763 | Tumor_G3 |
| 16428 | NDUFB2   | 7.780384455 | Tumor_G3 |
| 16429 | NDUFB3   | 7.073000421 | Tumor_G3 |
| 16430 | NDUFB7   | 9.362979715 | Tumor_G3 |
| 16431 | CYC1     | 8.295362618 | Tumor_G3 |
| 16432 | ETFB     | 5.675862996 | Tumor_G3 |
| 16433 | UQCR10   | 8.297701595 | Tumor_G3 |
| 16434 | UQCRQ    | 7.963625337 | Tumor_G3 |
| 16435 | UQCC3    | 5.007344142 | Tumor_G3 |
| 16436 | COX15    | 5.889725703 | Tumor_G3 |
| 16437 | COX5A    | 8.37976844  | Tumor_G3 |
| 16438 | COX6B1   | 9.385174004 | Tumor_G3 |

|       |          |             |          |
|-------|----------|-------------|----------|
| 16439 | COX6C    | 7.234917194 | Tumor_G3 |
| 16440 | COX7A2   | 7.948197096 | Tumor_G3 |
| 16441 | COX7B    | 7.506971246 | Tumor_G3 |
| 16442 | COX8A    | 10.83594617 | Tumor_G3 |
| 16443 | SCO1     | 4.377933043 | Tumor_G3 |
| 16444 | SURF1    | 6.968121223 | Tumor_G3 |
| 16445 | ATP6V1E1 | 7.706031113 | Tumor_G3 |
| 16446 | DLAT     | 6.403130773 | Tumor_G3 |
| 16447 | PDC      | 0.155017357 | Tumor_G3 |
| 16448 | SUCLG2   | 7.919349289 | Tumor_G3 |
| 16449 | SLC25A5  | 9.971874073 | Tumor_G3 |
| 16450 | UCP2     | 4.938063858 | Tumor_G3 |
| 16451 | SOD2     | 5.466454139 | Tumor_G3 |
| 16452 | NOX4     | 2.018720016 | Tumor_G3 |
| 16453 | DUOX1    | 7.551401391 | Tumor_G3 |
| 16454 | DUOXA1   | 6.794528192 | Tumor_G3 |
| 16455 | DUOX2    | 8.487466916 | Tumor_G3 |
| 16456 | DUOXA2   | 7.152828426 | Tumor_G3 |
| 16457 | NDUFA1   | 9.020877254 | Tumor_G3 |
| 16458 | NDUFA2   | 8.052318675 | Tumor_G3 |
| 16459 | NDUFA8   | 7.484829728 | Tumor_G3 |
| 16460 | NDUFB1   | 7.084923774 | Tumor_G3 |
| 16461 | NDUFB10  | 8.53708064  | Tumor_G3 |
| 16462 | NDUFB2   | 7.792990357 | Tumor_G3 |
| 16463 | NDUFB3   | 6.87008107  | Tumor_G3 |
| 16464 | NDUFB7   | 10.27739025 | Tumor_G3 |
| 16465 | CYC1     | 7.315010125 | Tumor_G3 |
| 16466 | ETFB     | 6.275218613 | Tumor_G3 |
| 16467 | UQCR10   | 8.64543984  | Tumor_G3 |
| 16468 | UQCRQ    | 8.506924414 | Tumor_G3 |
| 16469 | UQCC3    | 5.570593958 | Tumor_G3 |
| 16470 | COX15    | 4.342707445 | Tumor_G3 |
| 16471 | COX5A    | 7.874494577 | Tumor_G3 |
| 16472 | COX6B1   | 9.882786804 | Tumor_G3 |
| 16473 | COX6C    | 7.095534716 | Tumor_G3 |
| 16474 | COX7A2   | 7.530496485 | Tumor_G3 |
| 16475 | COX7B    | 6.827897916 | Tumor_G3 |
| 16476 | COX8A    | 10.51011947 | Tumor_G3 |
| 16477 | SCO1     | 2.557771937 | Tumor_G3 |
| 16478 | SURF1    | 7.240879049 | Tumor_G3 |

|       |          |             |          |
|-------|----------|-------------|----------|
| 16479 | ATP6V1E1 | 7.573965907 | Tumor_G3 |
| 16480 | DLAT     | 3.945061307 | Tumor_G3 |
| 16481 | PDC      | 0           | Tumor_G3 |
| 16482 | SUCLG2   | 5.4359193   | Tumor_G3 |
| 16483 | SLC25A5  | 8.147055123 | Tumor_G3 |
| 16484 | UCP2     | 8.676877494 | Tumor_G3 |
| 16485 | SOD2     | 4.526256854 | Tumor_G3 |
| 16486 | NOX4     | 1.316560072 | Tumor_G3 |
| 16487 | DUOX1    | 5.230477346 | Tumor_G3 |
| 16488 | DUOXA1   | 5.883229774 | Tumor_G3 |
| 16489 | DUOX2    | 4.549936151 | Tumor_G3 |
| 16490 | DUOXA2   | 4.515875377 | Tumor_G3 |
| 16491 | NDUFA1   | 9.35665309  | Tumor_G3 |
| 16492 | NDUFA2   | 7.980973445 | Tumor_G3 |
| 16493 | NDUFA8   | 7.731632375 | Tumor_G3 |
| 16494 | NDUFB1   | 6.891409989 | Tumor_G3 |
| 16495 | NDUFB10  | 8.645123386 | Tumor_G3 |
| 16496 | NDUFB2   | 7.921455216 | Tumor_G3 |
| 16497 | NDUFB3   | 6.863120388 | Tumor_G3 |
| 16498 | NDUFB7   | 10.06096132 | Tumor_G3 |
| 16499 | CYC1     | 7.62999897  | Tumor_G3 |
| 16500 | ETFB     | 5.781632584 | Tumor_G3 |
| 16501 | UQCR10   | 9.140884291 | Tumor_G3 |
| 16502 | UQCRQ    | 8.302788073 | Tumor_G3 |
| 16503 | UQCC3    | 6.016504659 | Tumor_G3 |
| 16504 | COX15    | 4.758505227 | Tumor_G3 |
| 16505 | COX5A    | 7.804487686 | Tumor_G3 |
| 16506 | COX6B1   | 10.05143884 | Tumor_G3 |
| 16507 | COX6C    | 7.328660262 | Tumor_G3 |
| 16508 | COX7A2   | 7.556415764 | Tumor_G3 |
| 16509 | COX7B    | 7.034522646 | Tumor_G3 |
| 16510 | COX8A    | 10.81245189 | Tumor_G3 |
| 16511 | SCO1     | 3.566199715 | Tumor_G3 |
| 16512 | SURF1    | 7.308349335 | Tumor_G3 |
| 16513 | ATP6V1E1 | 6.340973036 | Tumor_G3 |
| 16514 | DLAT     | 4.494951873 | Tumor_G3 |
| 16515 | PDC      | 0.058735579 | Tumor_G3 |
| 16516 | SUCLG2   | 5.634839063 | Tumor_G3 |
| 16517 | SLC25A5  | 7.800412584 | Tumor_G3 |
| 16518 | UCP2     | 7.61422042  | Tumor_G3 |

|       |          |             |          |
|-------|----------|-------------|----------|
| 16519 | SOD2     | 3.949368229 | Tumor_G3 |
| 16520 | NOX4     | 1.610510147 | Tumor_G3 |
| 16521 | DUOX1    | 7.345483298 | Tumor_G3 |
| 16522 | DUOXA1   | 7.210759855 | Tumor_G3 |
| 16523 | DUOX2    | 7.668993657 | Tumor_G3 |
| 16524 | DUOXA2   | 7.775375491 | Tumor_G3 |
| 16525 | NDUFA1   | 8.897205978 | Tumor_G3 |
| 16526 | NDUFA2   | 7.28231853  | Tumor_G3 |
| 16527 | NDUFA8   | 7.928196657 | Tumor_G3 |
| 16528 | NDUFB1   | 6.64416115  | Tumor_G3 |
| 16529 | NDUFB10  | 7.823938399 | Tumor_G3 |
| 16530 | NDUFB2   | 7.509070273 | Tumor_G3 |
| 16531 | NDUFB3   | 7.144544245 | Tumor_G3 |
| 16532 | NDUFB7   | 9.432332122 | Tumor_G3 |
| 16533 | CYC1     | 7.711918881 | Tumor_G3 |
| 16534 | ETFB     | 5.685762806 | Tumor_G3 |
| 16535 | UQCR10   | 8.491191813 | Tumor_G3 |
| 16536 | UQCRQ    | 8.116690361 | Tumor_G3 |
| 16537 | UQCC3    | 5.051497679 | Tumor_G3 |
| 16538 | COX15    | 4.889157036 | Tumor_G3 |
| 16539 | COX5A    | 7.883333477 | Tumor_G3 |
| 16540 | COX6B1   | 9.342245276 | Tumor_G3 |
| 16541 | COX6C    | 7.437993693 | Tumor_G3 |
| 16542 | COX7A2   | 7.570861856 | Tumor_G3 |
| 16543 | COX7B    | 7.277226231 | Tumor_G3 |
| 16544 | COX8A    | 10.53871267 | Tumor_G3 |
| 16545 | SCO1     | 3.498203125 | Tumor_G3 |
| 16546 | SURF1    | 6.918854115 | Tumor_G3 |
| 16547 | ATP6V1E1 | 7.202319805 | Tumor_G3 |
| 16548 | DLAT     | 5.303103466 | Tumor_G3 |
| 16549 | PDC      | 0.062033326 | Tumor_G3 |
| 16550 | SUCLG2   | 6.640042468 | Tumor_G3 |
| 16551 | SLC25A5  | 8.619991472 | Tumor_G3 |
| 16552 | UCP2     | 5.156908381 | Tumor_G3 |
| 16553 | SOD2     | 4.622784113 | Tumor_G3 |
| 16554 | NOX4     | 1.135325082 | Tumor_G3 |
| 16555 | DUOX1    | 8.011120882 | Tumor_G3 |
| 16556 | DUOXA1   | 7.734610349 | Tumor_G3 |
| 16557 | DUOX2    | 8.465068182 | Tumor_G3 |
| 16558 | DUOXA2   | 6.551259991 | Tumor_G3 |

|       |          |             |          |
|-------|----------|-------------|----------|
| 16559 | NDUFA1   | 8.076510558 | Tumor_G3 |
| 16560 | NDUFA2   | 7.404188739 | Tumor_G3 |
| 16561 | NDUFA8   | 7.472919923 | Tumor_G3 |
| 16562 | NDUFB1   | 5.919374419 | Tumor_G3 |
| 16563 | NDUFB10  | 8.413078558 | Tumor_G3 |
| 16564 | NDUFB2   | 7.190818294 | Tumor_G3 |
| 16565 | NDUFB3   | 6.247252987 | Tumor_G3 |
| 16566 | NDUFB7   | 9.613094426 | Tumor_G3 |
| 16567 | CYC1     | 7.419417438 | Tumor_G3 |
| 16568 | ETFB     | 6.122733819 | Tumor_G3 |
| 16569 | UQCR10   | 8.412834093 | Tumor_G3 |
| 16570 | UQCRQ    | 7.937290517 | Tumor_G3 |
| 16571 | UQCC3    | 5.434547366 | Tumor_G3 |
| 16572 | COX15    | 4.184696392 | Tumor_G3 |
| 16573 | COX5A    | 7.274300375 | Tumor_G3 |
| 16574 | COX6B1   | 9.536345489 | Tumor_G3 |
| 16575 | COX6C    | 6.781996242 | Tumor_G3 |
| 16576 | COX7A2   | 7.390513731 | Tumor_G3 |
| 16577 | COX7B    | 6.21395872  | Tumor_G3 |
| 16578 | COX8A    | 10.51230982 | Tumor_G3 |
| 16579 | SCO1     | 2.80357694  | Tumor_G3 |
| 16580 | SURF1    | 7.002309543 | Tumor_G3 |
| 16581 | ATP6V1E1 | 7.045679428 | Tumor_G3 |
| 16582 | DLAT     | 4.036459802 | Tumor_G3 |
| 16583 | PDC      | 0.159474961 | Tumor_G3 |
| 16584 | SUCLG2   | 5.778908477 | Tumor_G3 |
| 16585 | SLC25A5  | 7.776562565 | Tumor_G3 |
| 16586 | UCP2     | 9.265590428 | Tumor_G3 |
| 16587 | SOD2     | 4.229321049 | Tumor_G3 |
| 16588 | NOX4     | 1.988964591 | Tumor_G3 |
| 16589 | DUOX1    | 6.376260916 | Tumor_G3 |
| 16590 | DUOXA1   | 6.974233715 | Tumor_G3 |
| 16591 | DUOX2    | 6.521382839 | Tumor_G3 |
| 16592 | DUOXA2   | 5.519657215 | Tumor_G3 |
| 16593 | NDUFA1   | 9.315922724 | Tumor_G3 |
| 16594 | NDUFA2   | 7.968889245 | Tumor_G3 |
| 16595 | NDUFA8   | 7.535823091 | Tumor_G3 |
| 16596 | NDUFB1   | 6.240085493 | Tumor_G3 |
| 16597 | NDUFB10  | 9.155892329 | Tumor_G3 |
| 16598 | NDUFB2   | 7.239856724 | Tumor_G3 |

|       |          |             |          |
|-------|----------|-------------|----------|
| 16599 | NDUFB3   | 6.14170339  | Tumor_G3 |
| 16600 | NDUFB7   | 9.254360649 | Tumor_G3 |
| 16601 | CYC1     | 7.936841076 | Tumor_G3 |
| 16602 | ETFB     | 6.497214234 | Tumor_G3 |
| 16603 | UQCR10   | 8.129165812 | Tumor_G3 |
| 16604 | UQCRQ    | 8.26656897  | Tumor_G3 |
| 16605 | UQCC3    | 5.709253831 | Tumor_G3 |
| 16606 | COX15    | 5.232776552 | Tumor_G3 |
| 16607 | COX5A    | 7.677508121 | Tumor_G3 |
| 16608 | COX6B1   | 9.246412189 | Tumor_G3 |
| 16609 | COX6C    | 7.614878594 | Tumor_G3 |
| 16610 | COX7A2   | 7.149415762 | Tumor_G3 |
| 16611 | COX7B    | 7.270707147 | Tumor_G3 |
| 16612 | COX8A    | 10.00118985 | Tumor_G3 |
| 16613 | SCO1     | 3.478120696 | Tumor_G3 |
| 16614 | SURF1    | 7.47227826  | Tumor_G3 |
| 16615 | ATP6V1E1 | 7.157597475 | Tumor_G3 |
| 16616 | DLAT     | 4.714426498 | Tumor_G3 |
| 16617 | PDC      | 0           | Tumor_G3 |
| 16618 | SUCLG2   | 5.412090292 | Tumor_G3 |
| 16619 | SLC25A5  | 8.894397181 | Tumor_G3 |
| 16620 | UCP2     | 8.679890827 | Tumor_G3 |
| 16621 | SOD2     | 4.129168433 | Tumor_G3 |
| 16622 | NOX4     | 1.156732074 | Tumor_G3 |
| 16623 | DUOX1    | 7.268684543 | Tumor_G3 |
| 16624 | DUOXA1   | 6.365551465 | Tumor_G3 |
| 16625 | DUOX2    | 7.621903491 | Tumor_G3 |
| 16626 | DUOXA2   | 9.189500478 | Tumor_G3 |
| 16627 | NDUFA1   | 8.955796341 | Tumor_G3 |
| 16628 | NDUFA2   | 7.34889247  | Tumor_G3 |
| 16629 | NDUFA8   | 7.769505652 | Tumor_G3 |
| 16630 | NDUFB1   | 6.756490404 | Tumor_G3 |
| 16631 | NDUFB10  | 8.450627469 | Tumor_G3 |
| 16632 | NDUFB2   | 7.898002013 | Tumor_G3 |
| 16633 | NDUFB3   | 7.204458689 | Tumor_G3 |
| 16634 | NDUFB7   | 9.519125179 | Tumor_G3 |
| 16635 | CYC1     | 7.673030518 | Tumor_G3 |
| 16636 | ETFB     | 5.928646994 | Tumor_G3 |
| 16637 | UQCR10   | 9.196277511 | Tumor_G3 |
| 16638 | UQCRQ    | 8.037869753 | Tumor_G3 |



|       |          |             |          |
|-------|----------|-------------|----------|
| 16639 | UQCC3    | 5.142549453 | Tumor_G3 |
| 16640 | COX15    | 5.106171352 | Tumor_G3 |
| 16641 | COX5A    | 7.689596584 | Tumor_G3 |
| 16642 | COX6B1   | 9.375178154 | Tumor_G3 |
| 16643 | COX6C    | 7.380977521 | Tumor_G3 |
| 16644 | COX7A2   | 7.295148463 | Tumor_G3 |
| 16645 | COX7B    | 7.110334618 | Tumor_G3 |
| 16646 | COX8A    | 10.35528515 | Tumor_G3 |
| 16647 | SCO1     | 4.613150759 | Tumor_G3 |
| 16648 | SURF1    | 7.271262459 | Tumor_G3 |
| 16649 | ATP6V1E1 | 6.666033916 | Tumor_G3 |
| 16650 | DLAT     | 5.176533686 | Tumor_G3 |
| 16651 | PDC      | 0           | Tumor_G3 |
| 16652 | SUCLG2   | 6.415050962 | Tumor_G3 |
| 16653 | SLC25A5  | 8.887557601 | Tumor_G3 |
| 16654 | UCP2     | 6.698995601 | Tumor_G3 |
| 16655 | SOD2     | 4.875167597 | Tumor_G3 |
| 16656 | NOX4     | 0.798856243 | Tumor_G3 |
| 16657 | DUOX1    | 7.252462892 | Tumor_G3 |
| 16658 | DUOXA1   | 6.807440299 | Tumor_G3 |
| 16659 | DUOX2    | 7.421349538 | Tumor_G3 |
| 16660 | DUOXA2   | 7.662449778 | Tumor_G3 |
| 16661 | NDUFA1   | 9.15408625  | Tumor_G3 |
| 16662 | NDUFA2   | 8.011242731 | Tumor_G3 |
| 16663 | NDUFA8   | 8.269637255 | Tumor_G3 |
| 16664 | NDUFB1   | 7.308415564 | Tumor_G3 |
| 16665 | NDUFB10  | 8.392142034 | Tumor_G3 |
| 16666 | NDUFB2   | 7.67453067  | Tumor_G3 |
| 16667 | NDUFB3   | 7.183231354 | Tumor_G3 |
| 16668 | NDUFB7   | 9.764215992 | Tumor_G3 |
| 16669 | CYC1     | 7.353276671 | Tumor_G3 |
| 16670 | ETFB     | 6.220993611 | Tumor_G3 |
| 16671 | UQCR10   | 7.841967963 | Tumor_G3 |
| 16672 | UQCRQ    | 8.745875204 | Tumor_G3 |
| 16673 | UQCC3    | 5.299106413 | Tumor_G3 |
| 16674 | COX15    | 4.628069985 | Tumor_G3 |
| 16675 | COX5A    | 7.977453882 | Tumor_G3 |
| 16676 | COX6B1   | 10.03653578 | Tumor_G3 |
| 16677 | COX6C    | 7.799697415 | Tumor_G3 |
| 16678 | COX7A2   | 7.975276932 | Tumor_G3 |

|       |          |             |          |
|-------|----------|-------------|----------|
| 16679 | COX7B    | 7.363806741 | Tumor_G3 |
| 16680 | COX8A    | 10.44807726 | Tumor_G3 |
| 16681 | SCO1     | 2.92891565  | Tumor_G3 |
| 16682 | SURF1    | 6.871165349 | Tumor_G3 |
| 16683 | ATP6V1E1 | 6.623259508 | Tumor_G3 |
| 16684 | DLAT     | 4.543001433 | Tumor_G3 |
| 16685 | PDC      | 0           | Tumor_G3 |
| 16686 | SUCLG2   | 6.039703111 | Tumor_G3 |
| 16687 | SLC25A5  | 7.934249667 | Tumor_G3 |
| 16688 | UCP2     | 8.597761192 | Tumor_G3 |
| 16689 | SOD2     | 3.882629718 | Tumor_G3 |
| 16690 | NOX4     | 2.256444028 | Tumor_G3 |
| 16691 | DUOX1    | 7.395877183 | Tumor_G3 |
| 16692 | DUOXA1   | 7.353004655 | Tumor_G3 |
| 16693 | DUOX2    | 8.606664124 | Tumor_G3 |
| 16694 | DUOXA2   | 6.69359741  | Tumor_G3 |
| 16695 | NDUFA1   | 8.996891979 | Tumor_G3 |
| 16696 | NDUFA2   | 7.693419504 | Tumor_G3 |
| 16697 | NDUFA8   | 7.778386093 | Tumor_G3 |
| 16698 | NDUFB1   | 6.959256966 | Tumor_G3 |
| 16699 | NDUFB10  | 8.242663475 | Tumor_G3 |
| 16700 | NDUFB2   | 7.847967476 | Tumor_G3 |
| 16701 | NDUFB3   | 7.147489956 | Tumor_G3 |
| 16702 | NDUFB7   | 9.691747383 | Tumor_G3 |
| 16703 | CYC1     | 7.686423136 | Tumor_G3 |
| 16704 | ETFB     | 5.942151781 | Tumor_G3 |
| 16705 | UQCR10   | 8.469188121 | Tumor_G3 |
| 16706 | UQCRQ    | 8.259484145 | Tumor_G3 |
| 16707 | UQCC3    | 5.228030746 | Tumor_G3 |
| 16708 | COX15    | 4.51058188  | Tumor_G3 |
| 16709 | COX5A    | 7.834639502 | Tumor_G3 |
| 16710 | COX6B1   | 9.687090157 | Tumor_G3 |
| 16711 | COX6C    | 7.253929937 | Tumor_G3 |
| 16712 | COX7A2   | 7.670370202 | Tumor_G3 |
| 16713 | COX7B    | 7.078974338 | Tumor_G3 |
| 16714 | COX8A    | 10.45453132 | Tumor_G3 |
| 16715 | SCO1     | 3.370369854 | Tumor_G3 |
| 16716 | SURF1    | 6.94611117  | Tumor_G3 |
| 16717 | ATP6V1E1 | 7.181098108 | Tumor_G3 |
| 16718 | DLAT     | 4.667266992 | Tumor_G3 |

|       |          |             |          |
|-------|----------|-------------|----------|
| 16719 | PDC      | 0.051547103 | Tumor_G3 |
| 16720 | SUCLG2   | 6.258351772 | Tumor_G3 |
| 16721 | SLC25A5  | 8.331116431 | Tumor_G3 |
| 16722 | UCP2     | 7.845773012 | Tumor_G3 |
| 16723 | SOD2     | 4.569781536 | Tumor_G3 |
| 16724 | NOX4     | 1.218062492 | Tumor_G3 |
| 16725 | DUOX1    | 7.697202021 | Tumor_G3 |
| 16726 | DUOXA1   | 7.794892095 | Tumor_G3 |
| 16727 | DUOX2    | 8.474190922 | Tumor_G3 |
| 16728 | DUOXA2   | 7.207764393 | Tumor_G3 |
| 16729 | NDUFA1   | 8.08561258  | Tumor_G3 |
| 16730 | NDUFA2   | 7.775866769 | Tumor_G3 |
| 16731 | NDUFA8   | 6.864897778 | Tumor_G3 |
| 16732 | NDUFB1   | 6.593018598 | Tumor_G3 |
| 16733 | NDUFB10  | 9.140695963 | Tumor_G3 |
| 16734 | NDUFB2   | 7.432782152 | Tumor_G3 |
| 16735 | NDUFB3   | 5.182939736 | Tumor_G3 |
| 16736 | NDUFB7   | 10.46540893 | Tumor_G3 |
| 16737 | CYC1     | 6.711938914 | Tumor_G3 |
| 16738 | ETFB     | 6.817520347 | Tumor_G3 |
| 16739 | UQCR10   | 8.458893486 | Tumor_G3 |
| 16740 | UQCRQ    | 8.921945563 | Tumor_G3 |
| 16741 | UQCC3    | 6.314735307 | Tumor_G3 |
| 16742 | COX15    | 3.797118155 | Tumor_G3 |
| 16743 | COX5A    | 7.237145775 | Tumor_G3 |
| 16744 | COX6B1   | 10.21546936 | Tumor_G3 |
| 16745 | COX6C    | 6.9719734   | Tumor_G3 |
| 16746 | COX7A2   | 6.965552992 | Tumor_G3 |
| 16747 | COX7B    | 5.649916643 | Tumor_G3 |
| 16748 | COX8A    | 9.659606292 | Tumor_G3 |
| 16749 | SCO1     | 2.01812718  | Tumor_G3 |
| 16750 | SURF1    | 6.621332752 | Tumor_G3 |
| 16751 | ATP6V1E1 | 6.272879092 | Tumor_G3 |
| 16752 | DLAT     | 2.534253496 | Tumor_G3 |
| 16753 | PDC      | 0           | Tumor_G3 |
| 16754 | SUCLG2   | 5.141749085 | Tumor_G3 |
| 16755 | SLC25A5  | 6.615254981 | Tumor_G3 |
| 16756 | UCP2     | 7.217011703 | Tumor_G3 |
| 16757 | SOD2     | 4.929895551 | Tumor_G3 |
| 16758 | NOX4     | 2.299974556 | Tumor_G3 |

|       |          |             |          |
|-------|----------|-------------|----------|
| 16759 | DUOX1    | 3.508664842 | Tumor_G3 |
| 16760 | DUOXA1   | 5.079602703 | Tumor_G3 |
| 16761 | DUOX2    | 1.870090443 | Tumor_G3 |
| 16762 | DUOXA2   | 2.086118431 | Tumor_G3 |
| 16763 | NDUFA1   | 8.076872773 | Tumor_G3 |
| 16764 | NDUFA2   | 7.236037446 | Tumor_G3 |
| 16765 | NDUFA8   | 7.386366001 | Tumor_G3 |
| 16766 | NDUFB1   | 5.767916547 | Tumor_G3 |
| 16767 | NDUFB10  | 8.184570677 | Tumor_G3 |
| 16768 | NDUFB2   | 6.907461437 | Tumor_G3 |
| 16769 | NDUFB3   | 6.420034311 | Tumor_G3 |
| 16770 | NDUFB7   | 9.43291971  | Tumor_G3 |
| 16771 | CYC1     | 7.18039454  | Tumor_G3 |
| 16772 | ETFB     | 6.215597688 | Tumor_G3 |
| 16773 | UQCR10   | 7.96080999  | Tumor_G3 |
| 16774 | UQCRQ    | 7.848194967 | Tumor_G3 |
| 16775 | UQCC3    | 5.301581804 | Tumor_G3 |
| 16776 | COX15    | 4.43597754  | Tumor_G3 |
| 16777 | COX5A    | 7.130901927 | Tumor_G3 |
| 16778 | COX6B1   | 9.222526585 | Tumor_G3 |
| 16779 | COX6C    | 6.526127254 | Tumor_G3 |
| 16780 | COX7A2   | 7.418776684 | Tumor_G3 |
| 16781 | COX7B    | 6.272115339 | Tumor_G3 |
| 16782 | COX8A    | 10.20496102 | Tumor_G3 |
| 16783 | SCO1     | 2.993994462 | Tumor_G3 |
| 16784 | SURF1    | 6.959226131 | Tumor_G3 |
| 16785 | ATP6V1E1 | 7.100190337 | Tumor_G3 |
| 16786 | DLAT     | 4.194726466 | Tumor_G3 |
| 16787 | PDC      | 0           | Tumor_G3 |
| 16788 | SUCLG2   | 5.462368606 | Tumor_G3 |
| 16789 | SLC25A5  | 8.005618819 | Tumor_G3 |
| 16790 | UCP2     | 9.731851926 | Tumor_G3 |
| 16791 | SOD2     | 4.690517753 | Tumor_G3 |
| 16792 | NOX4     | 2.968088965 | Tumor_G3 |
| 16793 | DUOX1    | 6.544096615 | Tumor_G3 |
| 16794 | DUOXA1   | 6.959579233 | Tumor_G3 |
| 16795 | DUOX2    | 6.795108704 | Tumor_G3 |
| 16796 | DUOXA2   | 5.062387278 | Tumor_G3 |
| 16797 | NDUFA1   | 8.743358795 | Tumor_G3 |
| 16798 | NDUFA2   | 8.005225487 | Tumor_G3 |

|       |          |             |          |
|-------|----------|-------------|----------|
| 16799 | NDUFA8   | 7.58399764  | Tumor_G3 |
| 16800 | NDUFB1   | 6.069761844 | Tumor_G3 |
| 16801 | NDUFB10  | 7.819311567 | Tumor_G3 |
| 16802 | NDUFB2   | 7.135493369 | Tumor_G3 |
| 16803 | NDUFB3   | 6.634645711 | Tumor_G3 |
| 16804 | NDUFB7   | 9.378502392 | Tumor_G3 |
| 16805 | CYC1     | 7.298640492 | Tumor_G3 |
| 16806 | ETFB     | 6.838938658 | Tumor_G3 |
| 16807 | UQCR10   | 8.726038134 | Tumor_G3 |
| 16808 | UQCRQ    | 8.317844283 | Tumor_G3 |
| 16809 | UQCC3    | 4.155523292 | Tumor_G3 |
| 16810 | COX15    | 5.103790932 | Tumor_G3 |
| 16811 | COX5A    | 6.973773486 | Tumor_G3 |
| 16812 | COX6B1   | 9.930985518 | Tumor_G3 |
| 16813 | COX6C    | 7.094469306 | Tumor_G3 |
| 16814 | COX7A2   | 7.612580842 | Tumor_G3 |
| 16815 | COX7B    | 6.114167437 | Tumor_G3 |
| 16816 | COX8A    | 9.263261474 | Tumor_G3 |
| 16817 | SCO1     | 3.759413788 | Tumor_G3 |
| 16818 | SURF1    | 6.98127358  | Tumor_G3 |
| 16819 | ATP6V1E1 | 6.46448173  | Tumor_G3 |
| 16820 | DLAT     | 4.074650041 | Tumor_G3 |
| 16821 | PDC      | 0.203365903 | Tumor_G3 |
| 16822 | SUCLG2   | 6.093209508 | Tumor_G3 |
| 16823 | SLC25A5  | 7.867884185 | Tumor_G3 |
| 16824 | UCP2     | 6.76801991  | Tumor_G3 |
| 16825 | SOD2     | 3.498652958 | Tumor_G3 |
| 16826 | NOX4     | 1.35772657  | Tumor_G3 |
| 16827 | DUOX1    | 5.432390612 | Tumor_G3 |
| 16828 | DUOXA1   | 5.251096003 | Tumor_G3 |
| 16829 | DUOX2    | 5.527481047 | Tumor_G3 |
| 16830 | DUOXA2   | 4.378631063 | Tumor_G3 |
| 16831 | NDUFA1   | 8.672752447 | Tumor_G3 |
| 16832 | NDUFA2   | 7.541178904 | Tumor_G3 |
| 16833 | NDUFA8   | 7.708515508 | Tumor_G3 |
| 16834 | NDUFB1   | 6.571532444 | Tumor_G3 |
| 16835 | NDUFB10  | 7.92924286  | Tumor_G3 |
| 16836 | NDUFB2   | 7.39179056  | Tumor_G3 |
| 16837 | NDUFB3   | 6.863418261 | Tumor_G3 |
| 16838 | NDUFB7   | 9.387513337 | Tumor_G3 |

|       |          |             |          |
|-------|----------|-------------|----------|
| 16839 | CYC1     | 7.212377913 | Tumor_G3 |
| 16840 | ETFB     | 5.436569422 | Tumor_G3 |
| 16841 | UQCR10   | 8.282597852 | Tumor_G3 |
| 16842 | UQCRQ    | 8.087001319 | Tumor_G3 |
| 16843 | UQCC3    | 4.823545909 | Tumor_G3 |
| 16844 | COX15    | 4.697910465 | Tumor_G3 |
| 16845 | COX5A    | 7.129953806 | Tumor_G3 |
| 16846 | COX6B1   | 9.248498434 | Tumor_G3 |
| 16847 | COX6C    | 7.106196355 | Tumor_G3 |
| 16848 | COX7A2   | 7.401199314 | Tumor_G3 |
| 16849 | COX7B    | 6.641382726 | Tumor_G3 |
| 16850 | COX8A    | 9.526349625 | Tumor_G3 |
| 16851 | SCO1     | 3.161991283 | Tumor_G3 |
| 16852 | SURF1    | 6.551725355 | Tumor_G3 |
| 16853 | ATP6V1E1 | 7.044366123 | Tumor_G3 |
| 16854 | DLAT     | 4.850483059 | Tumor_G3 |
| 16855 | PDC      | 0.100726444 | Tumor_G3 |
| 16856 | SUCLG2   | 5.934256385 | Tumor_G3 |
| 16857 | SLC25A5  | 7.711485593 | Tumor_G3 |
| 16858 | UCP2     | 7.203815443 | Tumor_G3 |
| 16859 | SOD2     | 4.565635558 | Tumor_G3 |
| 16860 | NOX4     | 1.971815351 | Tumor_G3 |
| 16861 | DUOX1    | 7.858401047 | Tumor_G3 |
| 16862 | DUOXA1   | 7.638420021 | Tumor_G3 |
| 16863 | DUOX2    | 8.860771961 | Tumor_G3 |
| 16864 | DUOXA2   | 7.23730975  | Tumor_G3 |
| 16865 | NDUFA1   | 9.421088101 | Tumor_G3 |
| 16866 | NDUFA2   | 7.885814489 | Tumor_G3 |
| 16867 | NDUFA8   | 8.113130853 | Tumor_G3 |
| 16868 | NDUFB1   | 6.851981663 | Tumor_G3 |
| 16869 | NDUFB10  | 8.195342439 | Tumor_G3 |
| 16870 | NDUFB2   | 8.357260993 | Tumor_G3 |
| 16871 | NDUFB3   | 7.525144003 | Tumor_G3 |
| 16872 | NDUFB7   | 9.764065153 | Tumor_G3 |
| 16873 | CYC1     | 7.633834838 | Tumor_G3 |
| 16874 | ETFB     | 6.393266675 | Tumor_G3 |
| 16875 | UQCR10   | 9.016709172 | Tumor_G3 |
| 16876 | UQCRQ    | 8.3084212   | Tumor_G3 |
| 16877 | UQCC3    | 4.394016255 | Tumor_G3 |
| 16878 | COX15    | 5.214293232 | Tumor_G3 |

|       |          |             |          |
|-------|----------|-------------|----------|
| 16879 | COX5A    | 7.813311721 | Tumor_G3 |
| 16880 | COX6B1   | 9.724394906 | Tumor_G3 |
| 16881 | COX6C    | 7.502485738 | Tumor_G3 |
| 16882 | COX7A2   | 7.76815772  | Tumor_G3 |
| 16883 | COX7B    | 7.095572595 | Tumor_G3 |
| 16884 | COX8A    | 10.42773764 | Tumor_G3 |
| 16885 | SCO1     | 3.970176175 | Tumor_G3 |
| 16886 | SURF1    | 7.514931092 | Tumor_G3 |
| 16887 | ATP6V1E1 | 7.612264934 | Tumor_G3 |
| 16888 | DLAT     | 4.95071776  | Tumor_G3 |
| 16889 | PDC      | 0.049235462 | Tumor_G3 |
| 16890 | SUCLG2   | 6.361178645 | Tumor_G3 |
| 16891 | SLC25A5  | 8.59161387  | Tumor_G3 |
| 16892 | UCP2     | 8.049331608 | Tumor_G3 |
| 16893 | SOD2     | 4.144994286 | Tumor_G3 |
| 16894 | NOX4     | 0.580782619 | Tumor_G3 |
| 16895 | DUOX1    | 6.962825161 | Tumor_G3 |
| 16896 | DUOXA1   | 6.608713419 | Tumor_G3 |
| 16897 | DUOX2    | 7.104940139 | Tumor_G3 |
| 16898 | DUOXA2   | 5.628459407 | Tumor_G3 |
| 16899 | NDUFA1   | 8.70681749  | Tumor_G3 |
| 16900 | NDUFA2   | 7.786667073 | Tumor_G3 |
| 16901 | NDUFA8   | 7.66652915  | Tumor_G3 |
| 16902 | NDUFB1   | 6.487050552 | Tumor_G3 |
| 16903 | NDUFB10  | 8.338116216 | Tumor_G3 |
| 16904 | NDUFB2   | 6.692158628 | Tumor_G3 |
| 16905 | NDUFB3   | 6.101045771 | Tumor_G3 |
| 16906 | NDUFB7   | 9.89481994  | Tumor_G3 |
| 16907 | CYC1     | 7.06306192  | Tumor_G3 |
| 16908 | ETFB     | 5.641159179 | Tumor_G3 |
| 16909 | UQCR10   | 8.272860663 | Tumor_G3 |
| 16910 | UQCRQ    | 7.915534226 | Tumor_G3 |
| 16911 | UQCC3    | 5.676715849 | Tumor_G3 |
| 16912 | COX15    | 4.364820372 | Tumor_G3 |
| 16913 | COX5A    | 7.529754526 | Tumor_G3 |
| 16914 | COX6B1   | 9.794968895 | Tumor_G3 |
| 16915 | COX6C    | 6.970958874 | Tumor_G3 |
| 16916 | COX7A2   | 7.436090133 | Tumor_G3 |
| 16917 | COX7B    | 6.542749178 | Tumor_G3 |
| 16918 | COX8A    | 10.31373778 | Tumor_G3 |

|       |          |             |          |
|-------|----------|-------------|----------|
| 16919 | SCO1     | 2.741568774 | Tumor_G3 |
| 16920 | SURF1    | 7.095998332 | Tumor_G3 |
| 16921 | ATP6V1E1 | 7.024937317 | Tumor_G3 |
| 16922 | DLAT     | 3.968844096 | Tumor_G3 |
| 16923 | PDC      | 0.227517681 | Tumor_G3 |
| 16924 | SUCLG2   | 5.428738104 | Tumor_G3 |
| 16925 | SLC25A5  | 6.900995765 | Tumor_G3 |
| 16926 | UCP2     | 9.270313966 | Tumor_G3 |
| 16927 | SOD2     | 3.895905362 | Tumor_G3 |
| 16928 | NOX4     | 1.733911265 | Tumor_G3 |
| 16929 | DUOX1    | 5.617167512 | Tumor_G3 |
| 16930 | DUOXA1   | 6.466521657 | Tumor_G3 |
| 16931 | DUOX2    | 6.54222021  | Tumor_G3 |
| 16932 | DUOXA2   | 5.997029673 | Tumor_G3 |
| 16933 | NDUFA1   | 8.749520228 | Tumor_G3 |
| 16934 | NDUFA2   | 7.248098295 | Tumor_G3 |
| 16935 | NDUFA8   | 7.699552184 | Tumor_G3 |
| 16936 | NDUFB1   | 6.351653879 | Tumor_G3 |
| 16937 | NDUFB10  | 7.918987295 | Tumor_G3 |
| 16938 | NDUFB2   | 7.549905968 | Tumor_G3 |
| 16939 | NDUFB3   | 7.19506048  | Tumor_G3 |
| 16940 | NDUFB7   | 8.213671129 | Tumor_G3 |
| 16941 | CYC1     | 7.473621167 | Tumor_G3 |
| 16942 | ETFB     | 5.245381342 | Tumor_G3 |
| 16943 | UQCR10   | 8.649165266 | Tumor_G3 |
| 16944 | UQCRQ    | 7.890454531 | Tumor_G3 |
| 16945 | UQCC3    | 4.240676451 | Tumor_G3 |
| 16946 | COX15    | 5.681653902 | Tumor_G3 |
| 16947 | COX5A    | 7.89728222  | Tumor_G3 |
| 16948 | COX6B1   | 8.878084863 | Tumor_G3 |
| 16949 | COX6C    | 7.197379665 | Tumor_G3 |
| 16950 | COX7A2   | 7.397900226 | Tumor_G3 |
| 16951 | COX7B    | 7.079113188 | Tumor_G3 |
| 16952 | COX8A    | 10.24762237 | Tumor_G3 |
| 16953 | SCO1     | 4.146749516 | Tumor_G3 |
| 16954 | SURF1    | 7.171144345 | Tumor_G3 |
| 16955 | ATP6V1E1 | 7.13162678  | Tumor_G3 |
| 16956 | DLAT     | 6.113304167 | Tumor_G3 |
| 16957 | PDC      | 0.333734161 | Tumor_G3 |
| 16958 | SUCLG2   | 7.179039152 | Tumor_G3 |



|       |          |             |          |
|-------|----------|-------------|----------|
| 16959 | SLC25A5  | 8.424983708 | Tumor_G3 |
| 16960 | UCP2     | 8.407044222 | Tumor_G3 |
| 16961 | SOD2     | 5.214647214 | Tumor_G3 |
| 16962 | NOX4     | 0.919788973 | Tumor_G3 |
| 16963 | DUOX1    | 7.56758407  | Tumor_G3 |
| 16964 | DUOXA1   | 7.111300677 | Tumor_G3 |
| 16965 | DUOX2    | 8.48244911  | Tumor_G3 |
| 16966 | DUOXA2   | 6.021691857 | Tumor_G3 |
| 16967 | NDUFA1   | 8.99346138  | Tumor_G3 |
| 16968 | NDUFA2   | 7.303850895 | Tumor_G3 |
| 16969 | NDUFA8   | 7.736752423 | Tumor_G3 |
| 16970 | NDUFB1   | 7.005005508 | Tumor_G3 |
| 16971 | NDUFB10  | 8.120558234 | Tumor_G3 |
| 16972 | NDUFB2   | 7.804429215 | Tumor_G3 |
| 16973 | NDUFB3   | 7.246862207 | Tumor_G3 |
| 16974 | NDUFB7   | 9.116594237 | Tumor_G3 |
| 16975 | CYC1     | 8.038810973 | Tumor_G3 |
| 16976 | ETFB     | 5.482459208 | Tumor_G3 |
| 16977 | UQCR10   | 8.325973116 | Tumor_G3 |
| 16978 | UQCRQ    | 8.381661186 | Tumor_G3 |
| 16979 | UQCC3    | 4.36633255  | Tumor_G3 |
| 16980 | COX15    | 5.723152859 | Tumor_G3 |
| 16981 | COX5A    | 7.957283005 | Tumor_G3 |
| 16982 | COX6B1   | 8.880439328 | Tumor_G3 |
| 16983 | COX6C    | 7.262858634 | Tumor_G3 |
| 16984 | COX7A2   | 7.3050388   | Tumor_G3 |
| 16985 | COX7B    | 7.233468079 | Tumor_G3 |
| 16986 | COX8A    | 10.7401997  | Tumor_G3 |
| 16987 | SCO1     | 4.129451135 | Tumor_G3 |
| 16988 | SURF1    | 6.902919654 | Tumor_G3 |
| 16989 | ATP6V1E1 | 6.223697886 | Tumor_G3 |
| 16990 | DLAT     | 5.907002927 | Tumor_G3 |
| 16991 | PDC      | 0.039629468 | Tumor_G3 |
| 16992 | SUCLG2   | 7.240673411 | Tumor_G3 |
| 16993 | SLC25A5  | 8.633191863 | Tumor_G3 |
| 16994 | UCP2     | 4.882690852 | Tumor_G3 |
| 16995 | SOD2     | 5.630866048 | Tumor_G3 |
| 16996 | NOX4     | 1.690053663 | Tumor_G3 |
| 16997 | DUOX1    | 7.362874361 | Tumor_G3 |
| 16998 | DUOXA1   | 6.275115567 | Tumor_G3 |

|       |          |             |          |
|-------|----------|-------------|----------|
| 16999 | DUOX2    | 7.712355636 | Tumor_G3 |
| 17000 | DUOXA2   | 6.899121308 | Tumor_G3 |
| 17001 | NDUFA1   | 8.506370007 | Tumor_G3 |
| 17002 | NDUFA2   | 7.287339925 | Tumor_G3 |
| 17003 | NDUFA8   | 7.604887532 | Tumor_G3 |
| 17004 | NDUFB1   | 6.476357268 | Tumor_G3 |
| 17005 | NDUFB10  | 8.346569666 | Tumor_G3 |
| 17006 | NDUFB2   | 7.696026668 | Tumor_G3 |
| 17007 | NDUFB3   | 7.074829311 | Tumor_G3 |
| 17008 | NDUFB7   | 9.494916894 | Tumor_G3 |
| 17009 | CYC1     | 7.669515913 | Tumor_G3 |
| 17010 | ETFB     | 6.102175548 | Tumor_G3 |
| 17011 | UQCR10   | 8.260870911 | Tumor_G3 |
| 17012 | UQCRQ    | 8.177444834 | Tumor_G3 |
| 17013 | UQCC3    | 5.000205428 | Tumor_G3 |
| 17014 | COX15    | 5.592217988 | Tumor_G3 |
| 17015 | COX5A    | 7.568489858 | Tumor_G3 |
| 17016 | COX6B1   | 8.96252118  | Tumor_G3 |
| 17017 | COX6C    | 7.233728051 | Tumor_G3 |
| 17018 | COX7A2   | 7.287019331 | Tumor_G3 |
| 17019 | COX7B    | 6.524325029 | Tumor_G3 |
| 17020 | COX8A    | 10.54924092 | Tumor_G3 |
| 17021 | SCO1     | 4.258518341 | Tumor_G3 |
| 17022 | SURF1    | 7.194158628 | Tumor_G3 |
| 17023 | ATP6V1E1 | 7.065032682 | Tumor_G3 |
| 17024 | DLAT     | 5.536161959 | Tumor_G3 |
| 17025 | PDC      | 0.10397665  | Tumor_G3 |
| 17026 | SUCLG2   | 7.203185992 | Tumor_G3 |
| 17027 | SLC25A5  | 8.421749329 | Tumor_G3 |
| 17028 | UCP2     | 8.290546835 | Tumor_G3 |
| 17029 | SOD2     | 4.57680417  | Tumor_G3 |
| 17030 | NOX4     | 0.791161914 | Tumor_G3 |
| 17031 | DUOX1    | 7.853995198 | Tumor_G3 |
| 17032 | DUOXA1   | 7.328823184 | Tumor_G3 |
| 17033 | DUOX2    | 9.742489288 | Tumor_G3 |
| 17034 | DUOXA2   | 7.553886018 | Tumor_G3 |
| 17035 | NDUFA1   | 9.040227798 | Tumor_G3 |
| 17036 | NDUFA2   | 7.287857814 | Tumor_G3 |
| 17037 | NDUFA8   | 7.787621051 | Tumor_G3 |
| 17038 | NDUFB1   | 6.698013826 | Tumor_G3 |

|       |          |             |          |
|-------|----------|-------------|----------|
| 17039 | NDUFB10  | 7.850117311 | Tumor_G3 |
| 17040 | NDUFB2   | 7.596142751 | Tumor_G3 |
| 17041 | NDUFB3   | 7.519353567 | Tumor_G3 |
| 17042 | NDUFB7   | 8.198456386 | Tumor_G3 |
| 17043 | CYC1     | 8.38986095  | Tumor_G3 |
| 17044 | ETFB     | 5.800481289 | Tumor_G3 |
| 17045 | UQCR10   | 8.881817851 | Tumor_G3 |
| 17046 | UQCRQ    | 8.209184152 | Tumor_G3 |
| 17047 | UQCC3    | 4.671838069 | Tumor_G3 |
| 17048 | COX15    | 6.016003546 | Tumor_G3 |
| 17049 | COX5A    | 8.267980786 | Tumor_G3 |
| 17050 | COX6B1   | 9.665187362 | Tumor_G3 |
| 17051 | COX6C    | 7.433147237 | Tumor_G3 |
| 17052 | COX7A2   | 7.009284937 | Tumor_G3 |
| 17053 | COX7B    | 7.596600669 | Tumor_G3 |
| 17054 | COX8A    | 10.79988638 | Tumor_G3 |
| 17055 | SCO1     | 4.068366349 | Tumor_G3 |
| 17056 | SURF1    | 6.191232242 | Tumor_G3 |
| 17057 | ATP6V1E1 | 6.993858171 | Tumor_G3 |
| 17058 | DLAT     | 6.017878868 | Tumor_G3 |
| 17059 | PDC      | 0.270698135 | Tumor_G3 |
| 17060 | SUCLG2   | 6.828958298 | Tumor_G3 |
| 17061 | SLC25A5  | 8.921141715 | Tumor_G3 |
| 17062 | UCP2     | 7.667586314 | Tumor_G3 |
| 17063 | SOD2     | 4.860138673 | Tumor_G3 |
| 17064 | NOX4     | 1.832440681 | Tumor_G3 |
| 17065 | DUOX1    | 8.233664703 | Tumor_G3 |
| 17066 | DUOXA1   | 7.771975214 | Tumor_G3 |
| 17067 | DUOX2    | 8.096588435 | Tumor_G3 |
| 17068 | DUOXA2   | 5.978565266 | Tumor_G3 |
| 17069 | NDUFA1   | 8.36159864  | Tumor_G3 |
| 17070 | NDUFA2   | 7.529435788 | Tumor_G3 |
| 17071 | NDUFA8   | 7.554845961 | Tumor_G3 |
| 17072 | NDUFB1   | 6.402141617 | Tumor_G3 |
| 17073 | NDUFB10  | 7.979183471 | Tumor_G3 |
| 17074 | NDUFB2   | 7.46341333  | Tumor_G3 |
| 17075 | NDUFB3   | 6.897552178 | Tumor_G3 |
| 17076 | NDUFB7   | 9.451515472 | Tumor_G3 |
| 17077 | CYC1     | 7.31903783  | Tumor_G3 |
| 17078 | ETFB     | 5.616669102 | Tumor_G3 |

|       |          |             |          |
|-------|----------|-------------|----------|
| 17079 | UQCR10   | 8.374374653 | Tumor_G3 |
| 17080 | UQCRQ    | 7.863653926 | Tumor_G3 |
| 17081 | UQCC3    | 5.310291595 | Tumor_G3 |
| 17082 | COX15    | 4.798765273 | Tumor_G3 |
| 17083 | COX5A    | 7.391946671 | Tumor_G3 |
| 17084 | COX6B1   | 9.233903736 | Tumor_G3 |
| 17085 | COX6C    | 6.96653095  | Tumor_G3 |
| 17086 | COX7A2   | 7.226137148 | Tumor_G3 |
| 17087 | COX7B    | 6.669679919 | Tumor_G3 |
| 17088 | COX8A    | 10.18705973 | Tumor_G3 |
| 17089 | SCO1     | 3.441626691 | Tumor_G3 |
| 17090 | SURF1    | 6.921430287 | Tumor_G3 |
| 17091 | ATP6V1E1 | 6.433390106 | Tumor_G3 |
| 17092 | DLAT     | 5.140634027 | Tumor_G3 |
| 17093 | PDC      | 0.325012748 | Tumor_G3 |
| 17094 | SUCLG2   | 6.25626501  | Tumor_G3 |
| 17095 | SLC25A5  | 8.061706686 | Tumor_G3 |
| 17096 | UCP2     | 7.98562303  | Tumor_G3 |
| 17097 | SOD2     | 4.679687365 | Tumor_G3 |
| 17098 | NOX4     | 1.19684266  | Tumor_G3 |
| 17099 | DUOX1    | 7.266581804 | Tumor_G3 |
| 17100 | DUOXA1   | 7.17783449  | Tumor_G3 |
| 17101 | DUOX2    | 8.93491205  | Tumor_G3 |
| 17102 | DUOXA2   | 7.946707011 | Tumor_G3 |
| 17103 | NDUFA1   | 8.900522468 | Tumor_G3 |
| 17104 | NDUFA2   | 7.374684645 | Tumor_G3 |
| 17105 | NDUFA8   | 7.788260836 | Tumor_G3 |
| 17106 | NDUFB1   | 6.568043913 | Tumor_G3 |
| 17107 | NDUFB10  | 8.19370893  | Tumor_G3 |
| 17108 | NDUFB2   | 8.031285612 | Tumor_G3 |
| 17109 | NDUFB3   | 7.085056066 | Tumor_G3 |
| 17110 | NDUFB7   | 9.314584152 | Tumor_G3 |
| 17111 | CYC1     | 8.092170034 | Tumor_G3 |
| 17112 | ETFB     | 5.777227695 | Tumor_G3 |
| 17113 | UQCR10   | 8.02140719  | Tumor_G3 |
| 17114 | UQCRQ    | 8.001072026 | Tumor_G3 |
| 17115 | UQCC3    | 4.956310268 | Tumor_G3 |
| 17116 | COX15    | 5.33390958  | Tumor_G3 |
| 17117 | COX5A    | 8.33577321  | Tumor_G3 |
| 17118 | COX6B1   | 9.259714067 | Tumor_G3 |

|       |          |             |          |
|-------|----------|-------------|----------|
| 17119 | COX6C    | 7.328362913 | Tumor_G3 |
| 17120 | COX7A2   | 7.883691464 | Tumor_G3 |
| 17121 | COX7B    | 7.035248518 | Tumor_G3 |
| 17122 | COX8A    | 10.6743287  | Tumor_G3 |
| 17123 | SCO1     | 3.633795242 | Tumor_G3 |
| 17124 | SURF1    | 6.99455387  | Tumor_G3 |
| 17125 | ATP6V1E1 | 7.582877306 | Tumor_G3 |
| 17126 | DLAT     | 5.797214954 | Tumor_G3 |
| 17127 | PDC      | 0           | Tumor_G3 |
| 17128 | SUCLG2   | 7.305962668 | Tumor_G3 |
| 17129 | SLC25A5  | 9.837524588 | Tumor_G3 |
| 17130 | UCP2     | 7.275578458 | Tumor_G3 |
| 17131 | SOD2     | 5.049562844 | Tumor_G3 |
| 17132 | NOX4     | 0.737008606 | Tumor_G3 |
| 17133 | DUOX1    | 6.092055168 | Tumor_G3 |
| 17134 | DUOXA1   | 6.505625564 | Tumor_G3 |
| 17135 | DUOX2    | 7.857853687 | Tumor_G3 |
| 17136 | DUOXA2   | 5.776538246 | Tumor_G3 |
| 17137 | NDUFA1   | 9.134321493 | Tumor_G3 |
| 17138 | NDUFA2   | 8.36931632  | Tumor_G3 |
| 17139 | NDUFA8   | 7.637147222 | Tumor_G3 |
| 17140 | NDUFB1   | 7.680132432 | Tumor_G3 |
| 17141 | NDUFB10  | 9.470096346 | Tumor_G3 |
| 17142 | NDUFB2   | 8.526034759 | Tumor_G3 |
| 17143 | NDUFB3   | 5.84763259  | Tumor_G3 |
| 17144 | NDUFB7   | 11.01848272 | Tumor_G3 |
| 17145 | CYC1     | 7.143737131 | Tumor_G3 |
| 17146 | ETFB     | 7.517035377 | Tumor_G3 |
| 17147 | UQCR10   | 8.97404349  | Tumor_G3 |
| 17148 | UQCRQ    | 9.02214234  | Tumor_G3 |
| 17149 | UQCC3    | 6.970520983 | Tumor_G3 |
| 17150 | COX15    | 4.668817945 | Tumor_G3 |
| 17151 | COX5A    | 7.799922974 | Tumor_G3 |
| 17152 | COX6B1   | 10.66061094 | Tumor_G3 |
| 17153 | COX6C    | 7.543734149 | Tumor_G3 |
| 17154 | COX7A2   | 7.44590605  | Tumor_G3 |
| 17155 | COX7B    | 6.554659892 | Tumor_G3 |
| 17156 | COX8A    | 10.21029739 | Tumor_G3 |
| 17157 | SCO1     | 2.590155219 | Tumor_G3 |
| 17158 | SURF1    | 7.738759895 | Tumor_G3 |

|       |          |             |          |
|-------|----------|-------------|----------|
| 17159 | ATP6V1E1 | 7.171874367 | Tumor_G3 |
| 17160 | DLAT     | 3.626348123 | Tumor_G3 |
| 17161 | PDC      | 0.193358213 | Tumor_G3 |
| 17162 | SUCLG2   | 5.8754342   | Tumor_G3 |
| 17163 | SLC25A5  | 7.017970324 | Tumor_G3 |
| 17164 | UCP2     | 7.040113881 | Tumor_G3 |
| 17165 | SOD2     | 3.779294183 | Tumor_G3 |
| 17166 | NOX4     | 1.346898679 | Tumor_G3 |
| 17167 | DUOX1    | 5.054701526 | Tumor_G3 |
| 17168 | DUOXA1   | 6.139416619 | Tumor_G3 |
| 17169 | DUOX2    | 4.619445227 | Tumor_G3 |
| 17170 | DUOXA2   | 4.237126406 | Tumor_G3 |
| 17171 | NDUFA1   | 8.399137839 | Tumor_G3 |
| 17172 | NDUFA2   | 7.288803707 | Tumor_G3 |
| 17173 | NDUFA8   | 7.379577071 | Tumor_G3 |
| 17174 | NDUFB1   | 6.190312629 | Tumor_G3 |
| 17175 | NDUFB10  | 8.145806626 | Tumor_G3 |
| 17176 | NDUFB2   | 7.309774006 | Tumor_G3 |
| 17177 | NDUFB3   | 6.504293195 | Tumor_G3 |
| 17178 | NDUFB7   | 9.46887702  | Tumor_G3 |
| 17179 | CYC1     | 7.246047592 | Tumor_G3 |
| 17180 | ETFB     | 5.638334257 | Tumor_G3 |
| 17181 | UQCR10   | 8.19317812  | Tumor_G3 |
| 17182 | UQCRQ    | 7.837958423 | Tumor_G3 |
| 17183 | UQCC3    | 4.960380198 | Tumor_G3 |
| 17184 | COX15    | 4.471865832 | Tumor_G3 |
| 17185 | COX5A    | 7.572950715 | Tumor_G3 |
| 17186 | COX6B1   | 9.428825739 | Tumor_G3 |
| 17187 | COX6C    | 6.931495118 | Tumor_G3 |
| 17188 | COX7A2   | 7.281807482 | Tumor_G3 |
| 17189 | COX7B    | 6.289590484 | Tumor_G3 |
| 17190 | COX8A    | 9.853640288 | Tumor_G3 |
| 17191 | SCO1     | 2.790987274 | Tumor_G3 |
| 17192 | SURF1    | 6.984641741 | Tumor_G3 |
| 17193 | ATP6V1E1 | 7.291409361 | Tumor_G3 |
| 17194 | DLAT     | 4.240738345 | Tumor_G3 |
| 17195 | PDC      | 0           | Tumor_G3 |
| 17196 | SUCLG2   | 5.87119353  | Tumor_G3 |
| 17197 | SLC25A5  | 7.959433066 | Tumor_G3 |
| 17198 | UCP2     | 8.610729977 | Tumor_G3 |

|       |          |             |          |
|-------|----------|-------------|----------|
| 17199 | SOD2     | 4.971395974 | Tumor_G3 |
| 17200 | NOX4     | 2.725549758 | Tumor_G3 |
| 17201 | DUOX1    | 6.406850521 | Tumor_G3 |
| 17202 | DUOXA1   | 6.729597625 | Tumor_G3 |
| 17203 | DUOX2    | 5.967574296 | Tumor_G3 |
| 17204 | DUOXA2   | 5.151436101 | Tumor_G3 |
| 17205 | NDUFA1   | 9.457321502 | Tumor_G3 |
| 17206 | NDUFA2   | 7.983042056 | Tumor_G3 |
| 17207 | NDUFA8   | 7.806097521 | Tumor_G3 |
| 17208 | NDUFB1   | 7.341702205 | Tumor_G3 |
| 17209 | NDUFB10  | 8.052173247 | Tumor_G3 |
| 17210 | NDUFB2   | 6.85834686  | Tumor_G3 |
| 17211 | NDUFB3   | 6.292277666 | Tumor_G3 |
| 17212 | NDUFB7   | 9.464969083 | Tumor_G3 |
| 17213 | CYC1     | 7.446447928 | Tumor_G3 |
| 17214 | ETFB     | 5.899333536 | Tumor_G3 |
| 17215 | UQCR10   | 8.63128929  | Tumor_G3 |
| 17216 | UQCRQ    | 8.314732101 | Tumor_G3 |
| 17217 | UQCC3    | 4.721430345 | Tumor_G3 |
| 17218 | COX15    | 4.574293023 | Tumor_G3 |
| 17219 | COX5A    | 8.020303964 | Tumor_G3 |
| 17220 | COX6B1   | 9.604203756 | Tumor_G3 |
| 17221 | COX6C    | 7.878766807 | Tumor_G3 |
| 17222 | COX7A2   | 7.427497201 | Tumor_G3 |
| 17223 | COX7B    | 7.322292002 | Tumor_G3 |
| 17224 | COX8A    | 10.0799743  | Tumor_G3 |
| 17225 | SCO1     | 2.552981636 | Tumor_G3 |
| 17226 | SURF1    | 6.78934419  | Tumor_G3 |
| 17227 | ATP6V1E1 | 6.250606879 | Tumor_G3 |
| 17228 | DLAT     | 4.585389781 | Tumor_G3 |
| 17229 | PDC      | 0           | Tumor_G3 |
| 17230 | SUCLG2   | 5.66090801  | Tumor_G3 |
| 17231 | SLC25A5  | 6.664543517 | Tumor_G3 |
| 17232 | UCP2     | 9.210808485 | Tumor_G3 |
| 17233 | SOD2     | 3.735379728 | Tumor_G3 |
| 17234 | NOX4     | 1.04567906  | Tumor_G3 |
| 17235 | DUOX1    | 6.881754668 | Tumor_G3 |
| 17236 | DUOXA1   | 5.920346833 | Tumor_G3 |
| 17237 | DUOX2    | 7.556806298 | Tumor_G3 |
| 17238 | DUOXA2   | 8.675074883 | Tumor_G3 |

|       |          |             |          |
|-------|----------|-------------|----------|
| 17239 | NDUFA1   | 8.621441533 | Tumor_G3 |
| 17240 | NDUFA2   | 7.793367145 | Tumor_G3 |
| 17241 | NDUFA8   | 7.721176944 | Tumor_G3 |
| 17242 | NDUFB1   | 6.634887404 | Tumor_G3 |
| 17243 | NDUFB10  | 8.434435903 | Tumor_G3 |
| 17244 | NDUFB2   | 6.212367088 | Tumor_G3 |
| 17245 | NDUFB3   | 5.755422162 | Tumor_G3 |
| 17246 | NDUFB7   | 9.784518881 | Tumor_G3 |
| 17247 | CYC1     | 6.913462099 | Tumor_G3 |
| 17248 | ETFB     | 5.49292669  | Tumor_G3 |
| 17249 | UQCR10   | 8.286204018 | Tumor_G3 |
| 17250 | UQCRQ    | 7.854548098 | Tumor_G3 |
| 17251 | UQCC3    | 5.535590085 | Tumor_G3 |
| 17252 | COX15    | 4.34456804  | Tumor_G3 |
| 17253 | COX5A    | 7.414249317 | Tumor_G3 |
| 17254 | COX6B1   | 9.741765208 | Tumor_G3 |
| 17255 | COX6C    | 7.211561454 | Tumor_G3 |
| 17256 | COX7A2   | 7.091441568 | Tumor_G3 |
| 17257 | COX7B    | 6.302017158 | Tumor_G3 |
| 17258 | COX8A    | 9.587010953 | Tumor_G3 |
| 17259 | SCO1     | 2.582134998 | Tumor_G3 |
| 17260 | SURF1    | 6.851222393 | Tumor_G3 |
| 17261 | ATP6V1E1 | 6.507119205 | Tumor_G3 |
| 17262 | DLAT     | 3.922377627 | Tumor_G3 |
| 17263 | PDC      | 0           | Tumor_G3 |
| 17264 | SUCLG2   | 4.66711963  | Tumor_G3 |
| 17265 | SLC25A5  | 6.307895763 | Tumor_G3 |
| 17266 | UCP2     | 10.02988868 | Tumor_G3 |
| 17267 | SOD2     | 3.853137725 | Tumor_G3 |
| 17268 | NOX4     | 2.483611102 | Tumor_G3 |
| 17269 | DUOX1    | 5.965487922 | Tumor_G3 |
| 17270 | DUOXA1   | 6.831212128 | Tumor_G3 |
| 17271 | DUOX2    | 6.73735988  | Tumor_G3 |
| 17272 | DUOXA2   | 5.756880612 | Tumor_G3 |
| 17273 | NDUFA1   | 8.795603144 | Tumor_G3 |
| 17274 | NDUFA2   | 7.61236437  | Tumor_G3 |
| 17275 | NDUFA8   | 7.722874594 | Tumor_G3 |
| 17276 | NDUFB1   | 6.552217326 | Tumor_G3 |
| 17277 | NDUFB10  | 8.384704778 | Tumor_G3 |
| 17278 | NDUFB2   | 6.819071369 | Tumor_G3 |



|       |          |             |          |
|-------|----------|-------------|----------|
| 17279 | NDUFB3   | 6.465644904 | Tumor_G3 |
| 17280 | NDUFB7   | 9.777728909 | Tumor_G3 |
| 17281 | CYC1     | 7.108809367 | Tumor_G3 |
| 17282 | ETFB     | 5.735279267 | Tumor_G3 |
| 17283 | UQCR10   | 8.301763305 | Tumor_G3 |
| 17284 | UQCRQ    | 8.124621987 | Tumor_G3 |
| 17285 | UQCC3    | 5.320735876 | Tumor_G3 |
| 17286 | COX15    | 4.248273466 | Tumor_G3 |
| 17287 | COX5A    | 7.377390894 | Tumor_G3 |
| 17288 | COX6B1   | 9.776811779 | Tumor_G3 |
| 17289 | COX6C    | 7.21438183  | Tumor_G3 |
| 17290 | COX7A2   | 7.305184597 | Tumor_G3 |
| 17291 | COX7B    | 6.569340472 | Tumor_G3 |
| 17292 | COX8A    | 9.681848075 | Tumor_G3 |
| 17293 | SCO1     | 2.585227618 | Tumor_G3 |
| 17294 | SURF1    | 6.798991214 | Tumor_G3 |
| 17295 | ATP6V1E1 | 6.777848619 | Tumor_G3 |
| 17296 | DLAT     | 4.255355754 | Tumor_G3 |
| 17297 | PDC      | 0           | Tumor_G3 |
| 17298 | SUCLG2   | 5.300834893 | Tumor_G3 |
| 17299 | SLC25A5  | 7.15004538  | Tumor_G3 |
| 17300 | UCP2     | 9.143736679 | Tumor_G3 |
| 17301 | SOD2     | 4.080410873 | Tumor_G3 |
| 17302 | NOX4     | 3.034507301 | Tumor_G3 |
| 17303 | DUOX1    | 6.080842391 | Tumor_G3 |
| 17304 | DUOXA1   | 6.679932523 | Tumor_G3 |
| 17305 | DUOX2    | 6.358586383 | Tumor_G3 |
| 17306 | DUOXA2   | 5.636789801 | Tumor_G3 |
| 17307 | NDUFA1   | 8.802653949 | Tumor_G3 |
| 17308 | NDUFA2   | 7.32418053  | Tumor_G3 |
| 17309 | NDUFA8   | 7.582816476 | Tumor_G3 |
| 17310 | NDUFB1   | 6.718212627 | Tumor_G3 |
| 17311 | NDUFB10  | 8.041693382 | Tumor_G3 |
| 17312 | NDUFB2   | 7.261859879 | Tumor_G3 |
| 17313 | NDUFB3   | 6.670215366 | Tumor_G3 |
| 17314 | NDUFB7   | 9.263823553 | Tumor_G3 |
| 17315 | CYC1     | 7.324581156 | Tumor_G3 |
| 17316 | ETFB     | 5.426705503 | Tumor_G3 |
| 17317 | UQCR10   | 7.421414162 | Tumor_G3 |
| 17318 | UQCRQ    | 8.138700474 | Tumor_G3 |

|       |          |             |          |
|-------|----------|-------------|----------|
| 17319 | UQCC3    | 4.459158364 | Tumor_G3 |
| 17320 | COX15    | 4.690855959 | Tumor_G3 |
| 17321 | COX5A    | 7.675114157 | Tumor_G3 |
| 17322 | COX6B1   | 9.141727243 | Tumor_G3 |
| 17323 | COX6C    | 7.271712248 | Tumor_G3 |
| 17324 | COX7A2   | 7.396565855 | Tumor_G3 |
| 17325 | COX7B    | 6.723113067 | Tumor_G3 |
| 17326 | COX8A    | 9.99735174  | Tumor_G3 |
| 17327 | SCO1     | 3.181287535 | Tumor_G3 |
| 17328 | SURF1    | 6.858746166 | Tumor_G3 |
| 17329 | ATP6V1E1 | 6.031769784 | Tumor_G3 |
| 17330 | DLAT     | 4.71488752  | Tumor_G3 |
| 17331 | PDC      | 0.205725016 | Tumor_G3 |
| 17332 | SUCLG2   | 6.363071196 | Tumor_G3 |
| 17333 | SLC25A5  | 7.743147055 | Tumor_G3 |
| 17334 | UCP2     | 8.187848421 | Tumor_G3 |
| 17335 | SOD2     | 4.042604393 | Tumor_G3 |
| 17336 | NOX4     | 2.195262383 | Tumor_G3 |
| 17337 | DUOX1    | 8.598742182 | Tumor_G3 |
| 17338 | DUOXA1   | 8.225281266 | Tumor_G3 |
| 17339 | DUOX2    | 9.266641748 | Tumor_G3 |
| 17340 | DUOXA2   | 7.001645035 | Tumor_G3 |
