# Supplementary material for: Clinical Relevance and Tumor Growth Suppression of Mitochondrial ROS Regulators along NADH:Ubiquinone Oxidoreductase Subunit B3 in Thyroid Cancer
Source: Hindawi journal article supplement (doi:10.1155/2022/8038857), 2022-01-01
Supplement: f2 [file 8038857.f2.zip]

| Gene name | Forward primer          | Reverse primer        | Production length |
|-----------|-------------------------|-----------------------|-------------------|
| NDUFV1    | ATGAAGGTGACAGCGTGAGG    | TTCTTGGGTGCTGTCCGC    | 100bp             |
| NDUFV2    | TACGGCTGGAGTTTCAGAACTAA | CTGCTGGCATGCATTTGGAG  | 214bp             |
| NDUFV3    | AAAAAGCCAGCCCCAGTGC     | AGGATGCAGTGAAGACGGTG  | 209bp             |
| NDUFS1    | ACCGTCCTCCAAGTTGTAGCTG  | ACAGCACGCTTCCCCTCTAA  | 230bp             |
| NDUFS2    | TAGGATCACGGTCCTGGGAG    | CCTGGAACCAGCCACTAGG   | 111bp             |
| NDUFS3    | GTGGAGTTGGCCCAAGAGTT    | GCTTCTTGTCTCCGGCTTCA  | 112bp             |
| NDUFS4    | GGATCTTTGTTCTGCTCGC     | TAGCTCCATCGTTGATGCCC  | 128bp             |
| NDUFS5    | GCATCGGCCATGCCTTTCTT    | CGACCAGCCATCTTGTAGGG  | 104bp             |
| NDUFS6    | GTTCAGACAGCACCACCACT    | CACCAGGAATACCCTTCGCA  | 124bp             |
| NDUFS7    | AGTGGCCTTGTCTTTCTCAC    | CGCAGGTTTCAGAACAAAGGG | 96bp              |
| NDUFS8    | GAAGTTGCTCAACAACGGGG    | TCGGAGTGGTTTTATTGGGCA | 122bp             |
| NDUFA1    | GTGGTTCGAGATTCTCCCCG    | TTTCCTTGCCCCCGTTAGTG  | 104bp             |
| NDUFA2    | CGAATCCCGACCTACCCATC    | AAGAGAGAGAGGGAGGTGTC  | 113bp             |
| NDUFA3    | CATCTGGGATGAGACCTAGCG   | CTCAGCCTAGAAGTCGCTCC  | 114bp             |
| NDUFA4    | AGATCATCGGTCAGGCCAAG    | GGACCCAGTTTGTTCAGGG   | 163bp             |
| NDUFA5    | TGTGCTGAAGAAGAGGCTAAGA  | GCCAGCTTCTCATTTGTAATC | 117bp             |
| NDUFA6    | GGATCAGGGCAGCACTAACA    | GAACAGCTGTGCACCTAAGC  | 176bp             |
| NDUFA7    | CATCATGTCTCGTCGAGAAGG   | GAGGACAGCTCCCACCTCTT  | 120bp             |
| NDUFA8    | TTTGACGAGTGTGTGCTGGA    | TCCACCAGGGCTTGAGTTTC  | 144bp             |
| NDUFA9    | CCTGTGGCTGGCTACTCTTC    | GCAAAGACCCTTGCCTGGTA  | 125bp             |
| NDUFA10   | CTGCGATTACTCTGCCGGG     | CCCTCCCCGATCTTAAAGC   | 176bp             |
| NDUFA11   | GATGTCCACGCGTGTTCAG     | TGAGGGGCCCTTATTCCCAT  | 287bp             |
| NDUFA12   | TTTTTGCCGTCACCGATGG     | AAGCCAACGATGCCATTCAG  | 107bp             |
| NDUFA13   | ATACTGCGAGTATGGCGGC     | GTGCCCCGTAGATCAGGGTTC | 152bp             |
| NDUFB1    | ACTTCAGATTGTGCGGGACC    | GGCAGTTAGCCGTTTCATCAC | 100bp             |
| NDUFB2    | GTGCTGGGTCACTTTCCGTA    | GGCTCTTGTACAGAGTGAGGC | 115bp             |
| NDUFB3    | TGCTGTCAGGCAGAAGAACAG   | CTTAGCCCTTTTGCAGCCAG  | 159bp             |
| NDUFB4    | GGATTTGGGCCCTCATCTT     | TCACTCTGACAGCAGATTCCC | 279bp             |
| NDUFB5    | TTTCCGAAGGCTGCTGGTCA    | AAGGACGGCCATTGTTCTTTC | 156bp             |
| NDUFB6    | GAGGAAAATGGTCCATGGGGT   | TCTGGACTTCTTTCAACTATC | 139bp             |
| NDUFB7    | CCGGGTAGGAGCTAGGTGA     | GTAGTCTGGCGGGAAGGTTG  | 143bp             |
| NDUFB8    | CTGGGTCTGACCAGAGGCTA    | CTCATAGTGAACCACCCGCT  | 207bp             |

|         |                         |                       |       |
|---------|-------------------------|-----------------------|-------|
| NDUFB9  | GTAATGGCGTTCTTGGCGTC    | CGGGCTCTCATCAAACAAGC  | 141bp |
| NDUFB10 | AAAGCGTTCGACCTCATCGT    | ACTCAGTGATGTCTGGCACG  | 127bp |
| NDUFB11 | GACAAGGACCCCGTTTTGGA    | CCATCCCACGCTCTTGGAC   | 140bp |
| NDUFAB1 | TCGCGCAGGTTCCCTGGTAG    | GTCCTGGATGCCCTCTAACG  | 83bp  |
| NDUFC1  | AACTGACTACAAGGAGAAGGCT  | GGCTCTCGCACGTAGAACTT  | 275bp |
| NDUFC2  | TCGCCAGCTTCTATATATTACGG | TCAGTGAAACTGGAGCAAGC  | 219bp |
| MnSOD   | CCACTGCTGGGGATTGATGT    | CATTAGGGTATGATCAGCATA | 170bp |
