# Supplementary material for: Clinical Relevance and Tumor Growth Suppression of Mitochondrial ROS Regulators along NADH:Ubiquinone Oxidoreductase Subunit B3 in Thyroid Cancer
Source: Hindawi journal article supplement (doi:10.1155/2022/8038857), 2022-01-01
Supplement: f2 [file 8038857.f2.zip]

| Name     | logFC        | AveExpr    | t            | P.Value  | adj.P.Val | B           |
|----------|--------------|------------|--------------|----------|-----------|-------------|
| NDUFB3   | -1.09136663  | 6.31234456 | -29.20897714 | 1.64E-83 | 2.79E-79  | 179.3917534 |
| ATP5PF   | -0.963773616 | 6.77208906 | -22.124294   | 2.24E-61 | 1.90E-57  | 129.0455613 |
| NDUFB6   | -0.914182236 | 6.20621312 | -21.81579598 | 2.36E-60 | 1.34E-56  | 126.7139035 |
| SUCLG1   | -0.974284443 | 6.07562036 | -21.10485038 | 5.58E-58 | 2.37E-54  | 121.3012767 |
| BOLA3    | -0.947246301 | 3.47380511 | -20.97908898 | 1.48E-57 | 4.38E-54  | 120.3383077 |
| NDUFA1   | -0.818722892 | 6.05785056 | -20.97283888 | 1.55E-57 | 4.38E-54  | 120.2904078 |
| COX7A2   | -0.836530884 | 6.91643563 | -20.07278229 | 1.70E-54 | 4.13E-51  | 113.3524598 |
| MORN2    | -1.107969433 | 5.42428643 | -19.93260777 | 5.10E-54 | 1.08E-50  | 112.265089  |
| TMEM14   | -1.069690474 | 5.49308101 | -19.66561744 | 4.15E-53 | 7.81E-50  | 110.1891682 |
| GCSH     | -1.493511156 | 3.96125735 | -19.34202293 | 5.29E-52 | 8.98E-49  | 107.6650168 |
| NDUFB2   | -1.188724003 | 6.71950771 | -19.27872634 | 8.72E-52 | 1.34E-48  | 107.1702806 |
| ATP5MC   | -0.941702637 | 5.92033624 | -18.58391115 | 2.13E-49 | 3.01E-46  | 101.7195076 |
| NDUFA8   | -0.784984764 | 7.1817636  | -18.2782545  | 2.42E-48 | 3.15E-45  | 99.31099672 |
| GLRX5    | -0.796341062 | 5.38719004 | -18.22521693 | 3.69E-48 | 4.47E-45  | 98.89247066 |
| UQCRH    | -0.825315609 | 7.22489535 | -18.19284094 | 4.77E-48 | 5.39E-45  | 98.63690393 |
| ANAPC1   | -0.909031716 | 3.95405601 | -18.16854505 | 5.79E-48 | 6.09E-45  | 98.44507789 |
| ATP5F1C  | -0.768771878 | 7.60941026 | -18.16179173 | 6.11E-48 | 6.09E-45  | 98.39175143 |
| MRPS33   | -0.960598112 | 4.53199966 | -18.14327166 | 7.08E-48 | 6.67E-45  | 98.245497   |
| ATP5PD   | -0.87574813  | 6.91622254 | -18.10025304 | 9.97E-48 | 8.72E-45  | 97.9056979  |
| HSBP1    | -0.856228772 | 5.19954172 | -18.09641097 | 1.03E-47 | 8.72E-45  | 97.87534457 |
| LAMTOR   | -0.848215696 | 6.92078986 | -17.86861051 | 6.32E-47 | 5.11E-44  | 96.07417912 |
| PARK7    | -0.853357009 | 8.18760805 | -17.74088547 | 1.75E-46 | 1.35E-43  | 95.06306647 |
| C15orf61 | -0.820938598 | 2.55703268 | -17.69821813 | 2.47E-46 | 1.77E-43  | 94.72511314 |
| COX7B    | -0.914552186 | 6.26610868 | -17.69595231 | 2.51E-46 | 1.77E-43  | 94.70716386 |
| VDAC3    | -0.940531066 | 6.08461562 | -17.65369573 | 3.52E-46 | 2.39E-43  | 94.3723709  |
| RTN4IP1  | -0.832798621 | 3.74934224 | -17.63557545 | 4.07E-46 | 2.65E-43  | 94.22878002 |
| BEX3     | -1.216666792 | 8.54301211 | -17.61983173 | 4.61E-46 | 2.90E-43  | 94.10400891 |
| ATP5MC   | -0.920433142 | 6.28588401 | -17.51504819 | 1.07E-45 | 6.31E-43  | 93.2732898  |
| ATP5MG   | -0.7312178   | 7.06111501 | -17.51356767 | 1.08E-45 | 6.31E-43  | 93.26154868 |
| NDUFA1   | -0.867912529 | 8.17262181 | -17.49659237 | 1.24E-45 | 6.98E-43  | 93.12692086 |
| MRPS11   | -0.856075232 | 3.89986646 | -17.45368106 | 1.74E-45 | 9.53E-43  | 92.78654245 |
| COX8A    | -1.056235889 | 9.58584415 | -17.35708781 | 3.77E-45 | 2.00E-42  | 92.02006019 |
| COX6C    | -0.895119486 | 6.60591119 | -17.35180601 | 3.93E-45 | 2.02E-42  | 91.97813697 |
| SNAPC5   | -0.705466857 | 4.78932851 | -17.28358555 | 6.79E-45 | 3.39E-42  | 91.43654884 |
| RIDA     | -0.940415316 | 4.42619839 | -17.26903243 | 7.63E-45 | 3.70E-42  | 91.32099055 |
| POLR3K   | -0.972479105 | 4.60514021 | -17.15693578 | 1.87E-44 | 8.82E-42  | 90.43062027 |
| ELAC1    | -0.902643923 | 3.29914876 | -16.99746632 | 6.72E-44 | 3.08E-41  | 89.16319344 |
| ALG14    | -0.739688935 | 2.52859803 | -16.99199428 | 7.02E-44 | 3.13E-41  | 89.11968769 |
| APOO     | -0.9309396   | 5.12193303 | -16.96034036 | 9.05E-44 | 3.94E-41  | 88.86800287 |

|          |              |            |              |          |          |             |
|----------|--------------|------------|--------------|----------|----------|-------------|
| HDHC3    | -0.719882219 | 3.77673858 | -16.95263224 | 9.63E-44 | 4.08E-41 | 88.80670968 |
| METTL2   | -0.803587224 | 5.44293971 | -16.84342814 | 2.31E-43 | 9.56E-41 | 87.93815084 |
| MRPS28   | -0.869017026 | 4.46517745 | -16.83583031 | 2.46E-43 | 9.92E-41 | 87.87770823 |
| NDUFS3   | -0.661847354 | 5.71422434 | -16.81845206 | 2.82E-43 | 1.11E-40 | 87.73945393 |
| GON7     | -0.754202266 | 4.66029876 | -16.79756731 | 3.34E-43 | 1.29E-40 | 87.57329236 |
| ATP5MP   | -0.801296689 | 5.72681232 | -16.77674096 | 3.95E-43 | 1.49E-40 | 87.40758361 |
| ANAPC1   | -0.875492991 | 6.42510629 | -16.75794345 | 4.59E-43 | 1.69E-40 | 87.25800781 |
| SDSL     | -1.162990632 | 5.58024218 | -16.69007113 | 7.91E-43 | 2.86E-40 | 86.71785815 |
| FAM229E  | -0.945498592 | 4.37937345 | -16.64982948 | 1.09E-42 | 3.86E-40 | 86.39754907 |
| POP5     | -0.856100246 | 5.05191122 | -16.59334807 | 1.72E-42 | 5.92E-40 | 85.94791484 |
| MALSU1   | -0.761890939 | 4.11241898 | -16.59158937 | 1.74E-42 | 5.92E-40 | 85.93391311 |
| NDUFA6   | -0.901321463 | 6.71728473 | -16.54951005 | 2.44E-42 | 8.13E-40 | 85.59888395 |
| PRADC1   | -1.042662904 | 5.04531792 | -16.54478763 | 2.54E-42 | 8.28E-40 | 85.56128253 |
| ELP6     | -0.797154396 | 4.66008014 | -16.53845738 | 2.67E-42 | 8.55E-40 | 85.51087827 |
| MSRB2    | -1.023102264 | 5.55736722 | -16.53494858 | 2.75E-42 | 8.63E-40 | 85.48293925 |
| LSM10    | -0.78855413  | 5.82948698 | -16.52090304 | 3.08E-42 | 9.49E-40 | 85.37109871 |
| FXN      | -0.724162196 | 3.34679723 | -16.45565556 | 5.19E-42 | 1.56E-39 | 84.85150271 |
| TMEM12   | -0.664547996 | 5.44102572 | -16.45440203 | 5.25E-42 | 1.56E-39 | 84.84151956 |
| SMIM20   | -0.844960504 | 5.57483966 | -16.42976521 | 6.39E-42 | 1.87E-39 | 84.64530468 |
| FBXO16   | -0.946940962 | 2.28067155 | -16.38793883 | 8.95E-42 | 2.57E-39 | 84.31216403 |
| UQCR10   | -0.910662315 | 7.70280164 | -16.33001725 | 1.42E-41 | 4.03E-39 | 83.850783   |
| HINT2    | -0.864973789 | 5.05667864 | -16.25997459 | 2.50E-41 | 6.95E-39 | 83.29278839 |
| C11orf74 | -1.578786658 | 4.7385646  | -16.21828255 | 3.49E-41 | 9.48E-39 | 82.96062062 |
| DECR1    | -0.622934161 | 5.5715957  | -16.21741125 | 3.52E-41 | 9.48E-39 | 82.95367868 |
| NDUFB5   | -0.767788467 | 5.13632797 | -16.19102398 | 4.35E-41 | 1.15E-38 | 82.74343683 |
| BNIP1    | -0.756983648 | 3.71304687 | -16.15904364 | 5.62E-41 | 1.47E-38 | 82.48862288 |
| HSPB11   | -1.051982219 | 4.60275305 | -16.15579631 | 5.77E-41 | 1.48E-38 | 82.46274823 |
| COPZ1    | -0.74496838  | 7.23354378 | -16.13674409 | 6.73E-41 | 1.70E-38 | 82.31093849 |
| SNRNP2   | -1.091616558 | 4.6088203  | -16.13247431 | 6.96E-41 | 1.74E-38 | 82.27691616 |
| CISD3    | -0.908326049 | 5.40943298 | -16.08783434 | 9.97E-41 | 2.45E-38 | 81.92120852 |
| ECI2     | -0.774952025 | 4.89656526 | -16.04097995 | 1.45E-40 | 3.52E-38 | 81.54784156 |
| ZBTB8O   | -0.637069317 | 4.1327266  | -16.01159397 | 1.84E-40 | 4.36E-38 | 81.31366855 |
| TMEM24   | -0.752241479 | 3.74885418 | -16.01071165 | 1.85E-40 | 4.36E-38 | 81.30663738 |
| CYC1     | -0.882927    | 6.96017208 | -16.00917368 | 1.88E-40 | 4.36E-38 | 81.29438141 |
| RPL26L1  | -0.776385476 | 5.27017725 | -15.98805274 | 2.22E-40 | 5.09E-38 | 81.12606889 |
| TXNL4A   | -0.697775931 | 4.77153828 | -15.95336    | 2.94E-40 | 6.64E-38 | 80.84959973 |
| MKKS     | -0.795406204 | 4.0340548  | -15.93175445 | 3.49E-40 | 7.79E-38 | 80.67742178 |
| SLC25A2  | -1.059840668 | 4.52566057 | -15.92952948 | 3.56E-40 | 7.83E-38 | 80.65969067 |
| COX5A    | -0.801715098 | 7.19357577 | -15.91210559 | 4.09E-40 | 8.89E-38 | 80.52083637 |
| SLC35B1  | -0.954341125 | 4.88748544 | -15.87539704 | 5.49E-40 | 1.18E-37 | 80.22829823 |

|         |              |            |              |          |          |             |
|---------|--------------|------------|--------------|----------|----------|-------------|
| MANF    | -1.526630217 | 6.86362285 | -15.86787221 | 5.84E-40 | 1.24E-37 | 80.16833119 |
| COPS9   | -1.026480561 | 5.74162387 | -15.8460933  | 6.95E-40 | 1.46E-37 | 79.99477052 |
| LSM3    | -0.780147869 | 4.9919175  | -15.76917984 | 1.29E-39 | 2.67E-37 | 79.38183732 |
| ATP5F1E | -0.886160739 | 6.90228386 | -15.72099211 | 1.90E-39 | 3.88E-37 | 78.99783291 |
| QDPR    | -0.951356105 | 4.78463938 | -15.70436145 | 2.17E-39 | 4.37E-37 | 78.86530695 |
| NDUFC1  | -0.77670461  | 6.54297928 | -15.70180992 | 2.22E-39 | 4.37E-37 | 78.84497454 |
| CENPX   | -1.028909084 | 5.21724697 | -15.70176625 | 2.22E-39 | 4.37E-37 | 78.8446266  |
| EIPR1   | -0.914073387 | 4.23519255 | -15.6808046  | 2.62E-39 | 5.11E-37 | 78.67759061 |
| KRT10   | -1.182198387 | 4.88124116 | -15.67155887 | 2.83E-39 | 5.44E-37 | 78.60391551 |
| DPCD    | -0.806372542 | 4.99791853 | -15.58461752 | 5.68E-39 | 1.08E-36 | 77.91115087 |
| SSU72   | -0.71149955  | 6.03404695 | -15.58171175 | 5.81E-39 | 1.10E-36 | 77.88799835 |
| FDX1    | -0.927267486 | 5.04547093 | -15.53903724 | 8.19E-39 | 1.53E-36 | 77.54798672 |
| HGD     | -2.906128409 | 3.69324535 | -15.53027196 | 8.79E-39 | 1.62E-36 | 77.47815137 |
| POP4    | -0.569683708 | 3.80299394 | -15.52385905 | 9.25E-39 | 1.69E-36 | 77.42705846 |
| SDF2L1  | -1.753185971 | 6.54614846 | -15.5095129  | 1.04E-38 | 1.87E-36 | 77.31276176 |
| MGST2   | -0.792527254 | 5.05977625 | -15.50840859 | 1.05E-38 | 1.87E-36 | 77.30396375 |
| EIF2B2  | -1.058277022 | 5.02626143 | -15.49601841 | 1.16E-38 | 2.04E-36 | 77.20525256 |
| EBAG9   | -0.91402719  | 5.0040177  | -15.48805691 | 1.23E-38 | 2.16E-36 | 77.14182519 |
| NDUFB1  | -0.926413408 | 5.89891093 | -15.47837355 | 1.33E-38 | 2.31E-36 | 77.06468127 |
| COX7C   | -0.738516087 | 8.69184024 | -15.4443966  | 1.75E-38 | 3.00E-36 | 76.79400905 |
| TSFM    | -0.638068361 | 4.45810069 | -15.44030105 | 1.81E-38 | 3.07E-36 | 76.7613836  |
| ATP5PO  | -0.790607605 | 6.00696717 | -15.43204441 | 1.93E-38 | 3.25E-36 | 76.69561134 |
| NDUFA5  | -0.876170678 | 5.13045755 | -15.42859919 | 1.99E-38 | 3.31E-36 | 76.66816702 |
| UQCRCQ  | -0.852952864 | 7.42522976 | -15.40077721 | 2.49E-38 | 4.09E-36 | 76.4465466  |
| ATP5PB  | -0.832873492 | 6.72856796 | -15.39170185 | 2.67E-38 | 4.36E-36 | 76.374258   |
| KCNQ1   | -1.175338912 | 6.65952727 | -15.36832544 | 3.23E-38 | 5.21E-36 | 76.18806254 |
| CMC2    | -0.577818865 | 2.34171428 | -15.36034162 | 3.44E-38 | 5.51E-36 | 76.12447274 |
| NDUFC2  | -1.023568138 | 6.53525763 | -15.34487092 | 3.90E-38 | 6.18E-36 | 76.00125433 |
| MFSD3   | -1.04637598  | 5.52686493 | -15.31271618 | 5.04E-38 | 7.92E-36 | 75.74516779 |
| MPPED2  | -2.163220144 | 2.15139702 | -15.30520165 | 5.36E-38 | 8.34E-36 | 75.68532342 |
| MGST3   | -0.762891308 | 5.22660806 | -15.29858876 | 5.65E-38 | 8.71E-36 | 75.63266043 |
| PLEKHJ1 | -1.155219582 | 4.78942408 | -15.29054623 | 6.03E-38 | 9.21E-36 | 75.5686134  |
| CRELD2  | -1.459188733 | 4.81845095 | -15.28190917 | 6.46E-38 | 9.78E-36 | 75.49983332 |
| SPR     | -0.974503266 | 5.63711721 | -15.27803075 | 6.66E-38 | 1.00E-35 | 75.46894846 |
| COX16   | -0.77918213  | 5.26276567 | -15.27287111 | 6.94E-38 | 1.03E-35 | 75.42786149 |
| PEBP1   | -0.858145444 | 10.815693  | -15.25663547 | 7.91E-38 | 1.17E-35 | 75.29857819 |
| MTCH1   | -1.226655113 | 8.8479263  | -15.19365324 | 1.31E-37 | 1.92E-35 | 74.79710904 |
| SPX     | -2.284886353 | 2.64901461 | -15.18945551 | 1.36E-37 | 1.97E-35 | 74.76368966 |
| MPC1    | -1.003704059 | 6.0812808  | -15.18788081 | 1.37E-37 | 1.97E-35 | 74.75115308 |
| SWI5    | -1.039459935 | 6.03657771 | -15.18623228 | 1.39E-37 | 1.98E-35 | 74.7380288  |

|         |              |            |              |          |          |             |
|---------|--------------|------------|--------------|----------|----------|-------------|
| CHCHD1  | -0.700311354 | 6.06985084 | -15.17784388 | 1.49E-37 | 2.10E-35 | 74.67124805 |
| HSD17B  | -0.855742707 | 7.40989445 | -15.17155694 | 1.57E-37 | 2.20E-35 | 74.62119827 |
| C1QBP   | -0.765657996 | 6.1558855  | -15.11172104 | 2.53E-37 | 3.52E-35 | 74.14489943 |
| SEC61B  | -0.782714631 | 7.67337925 | -15.09588631 | 2.87E-37 | 3.96E-35 | 74.01886913 |
| SETMAR  | -0.856226003 | 4.02390554 | -15.03231454 | 4.79E-37 | 6.55E-35 | 73.51296437 |
| TIMMDC  | -0.705917126 | 5.88812926 | -15.02796595 | 4.96E-37 | 6.73E-35 | 73.47836251 |
| NDUFA4  | -0.853734679 | 7.46949523 | -15.01901935 | 5.33E-37 | 7.17E-35 | 73.4071759  |
| PTRHD1  | -0.947920401 | 5.17289835 | -15.01588814 | 5.46E-37 | 7.29E-35 | 73.38226189 |
| C2orf76 | -0.730739828 | 3.97093864 | -15.01472826 | 5.51E-37 | 7.31E-35 | 73.37303319 |
| ENSA    | -0.565035623 | 6.66427892 | -15.00383987 | 6.02E-37 | 7.91E-35 | 73.28640068 |
| COQ5    | -0.680609115 | 5.28085434 | -14.99043272 | 6.70E-37 | 8.74E-35 | 73.1797328  |
| CRADD   | -0.820950761 | 2.85413127 | -14.97824357 | 7.39E-37 | 9.56E-35 | 73.08276024 |
| TRAPPC  | -1.202065058 | 6.18675201 | -14.96912431 | 7.95E-37 | 1.02E-34 | 73.01021364 |
| CDKN2A  | -0.777923598 | 5.3967706  | -14.96881291 | 7.97E-37 | 1.02E-34 | 73.0077364  |
| COX6A1  | -0.810525548 | 7.7366856  | -14.96510377 | 8.21E-37 | 1.04E-34 | 72.9782299  |
| SIRT4   | -0.946459375 | 2.1388413  | -14.95914306 | 8.61E-37 | 1.08E-34 | 72.93081272 |
| MRPL48  | -0.655257371 | 4.08182202 | -14.95670268 | 8.78E-37 | 1.10E-34 | 72.91139998 |
| PRDX5   | -0.949580002 | 10.4800696 | -14.9207977  | 1.17E-36 | 1.45E-34 | 72.62580514 |
| IDH3B   | -0.725567665 | 6.27200217 | -14.8856301  | 1.55E-36 | 1.91E-34 | 72.34611756 |
| COQ3    | -0.63207233  | 3.78149554 | -14.87628896 | 1.67E-36 | 2.04E-34 | 72.27183481 |
| NDUFS4  | -0.801004058 | 6.59420167 | -14.85633951 | 1.96E-36 | 2.38E-34 | 72.11320277 |
| NDUFB4  | -0.611573768 | 6.98649697 | -14.85298591 | 2.02E-36 | 2.43E-34 | 72.08653729 |
| HSD17B1 | -0.931712316 | 6.46007274 | -14.82449403 | 2.53E-36 | 3.02E-34 | 71.86000694 |
| SPA17   | -0.844351466 | 3.39797188 | -14.82389041 | 2.55E-36 | 3.02E-34 | 71.85520801 |
| HEBP1   | -0.948638013 | 6.21731135 | -14.81986266 | 2.63E-36 | 3.10E-34 | 71.82318707 |
| STOML1  | -0.755565612 | 3.1750513  | -14.80733427 | 2.91E-36 | 3.40E-34 | 71.72358932 |
| NDRG2   | -1.133917703 | 4.52692116 | -14.78362377 | 3.52E-36 | 4.09E-34 | 71.5351128  |
| COX20   | -0.795450969 | 2.60240508 | -14.76014649 | 4.24E-36 | 4.90E-34 | 71.34851169 |
| TIMM21  | -0.711013791 | 3.38998839 | -14.74680287 | 4.72E-36 | 5.41E-34 | 71.24246426 |
| PDIA3   | -1.153303864 | 9.17333682 | -14.71562499 | 6.06E-36 | 6.90E-34 | 70.99470848 |
| TPMT    | -1.168802338 | 6.97872637 | -14.711505   | 6.27E-36 | 7.09E-34 | 70.96197193 |
| NUCB2   | -1.119479833 | 4.56244755 | -14.69132448 | 7.37E-36 | 8.28E-34 | 70.80163193 |
| TCTA    | -0.894328555 | 6.39528996 | -14.67578883 | 8.34E-36 | 9.31E-34 | 70.67820846 |
| ATP5MF  | -0.758557711 | 6.45517344 | -14.67225328 | 8.58E-36 | 9.52E-34 | 70.65012167 |
| HSP90B1 | -1.321934796 | 10.0129794 | -14.6684558  | 8.85E-36 | 9.75E-34 | 70.61995463 |
| COX17   | -0.777933962 | 5.37671457 | -14.65160288 | 1.01E-35 | 1.11E-33 | 70.48608336 |
| NUDT9   | -0.800502425 | 5.26768357 | -14.6297446  | 1.21E-35 | 1.31E-33 | 70.31247063 |
| LDHB    | -1.005574139 | 8.31274704 | -14.62538005 | 1.25E-35 | 1.35E-33 | 70.27780705 |
| TUSC2   | -0.695461454 | 5.7268146  | -14.61890222 | 1.32E-35 | 1.41E-33 | 70.22636127 |
| DCTN3   | -0.813466142 | 5.39820456 | -14.57518112 | 1.87E-35 | 1.99E-33 | 69.87918648 |



|         |              |            |              |          |          |             |
|---------|--------------|------------|--------------|----------|----------|-------------|
| RWDD1   | -0.625065222 | 4.74175575 | -14.54576327 | 2.36E-35 | 2.51E-33 | 69.64563969 |
| TMEM37  | -1.186332322 | 6.28698105 | -14.54403972 | 2.40E-35 | 2.52E-33 | 69.63195783 |
| CALR    | -1.232375233 | 10.6242153 | -14.53763101 | 2.52E-35 | 2.64E-33 | 69.58108544 |
| UBB     | -0.840457118 | 10.0562212 | -14.52845458 | 2.71E-35 | 2.82E-33 | 69.50824639 |
| TIMM8B  | -0.704984491 | 5.97056002 | -14.52129869 | 2.87E-35 | 2.97E-33 | 69.45144845 |
| SPATA2  | -0.836760115 | 3.21600854 | -14.51358787 | 3.06E-35 | 3.14E-33 | 69.39024876 |
| DNAJB1  | -0.96951918  | 5.32312784 | -14.50393868 | 3.30E-35 | 3.37E-33 | 69.31366876 |
| C11orf1 | -0.732286825 | 3.93142105 | -14.49483264 | 3.55E-35 | 3.61E-33 | 69.24140356 |
| UQCC2   | -0.858174905 | 4.32770535 | -14.48188652 | 3.94E-35 | 3.98E-33 | 69.13867101 |
| POLR2G  | -0.6763022   | 6.08223852 | -14.47633936 | 4.12E-35 | 4.13E-33 | 69.09465468 |
| ACADS   | -0.915494164 | 5.20360723 | -14.47254251 | 4.25E-35 | 4.24E-33 | 69.06452788 |
| SLC25A4 | -0.913437497 | 5.29163106 | -14.46430029 | 4.54E-35 | 4.50E-33 | 68.99913093 |
| COX14   | -0.787543553 | 7.20419688 | -14.45280025 | 4.97E-35 | 4.90E-33 | 68.90789113 |
| EMC3    | -0.763120351 | 5.8951892  | -14.44529998 | 5.28E-35 | 5.18E-33 | 68.84838872 |
| SMIM19  | -0.807608985 | 4.95866084 | -14.42775822 | 6.08E-35 | 5.92E-33 | 68.70923497 |
| MRPS7   | -0.707691961 | 5.44267212 | -14.41618649 | 6.66E-35 | 6.46E-33 | 68.61744869 |
| FUNDC1  | -0.692855124 | 5.13533339 | -14.39720964 | 7.76E-35 | 7.47E-33 | 68.4669411  |
| CMC1    | -0.462343063 | 2.06667567 | -14.39590535 | 7.84E-35 | 7.51E-33 | 68.45659735 |
| MICOS1  | -0.688477401 | 4.07754416 | -14.3896984  | 8.24E-35 | 7.85E-33 | 68.40737396 |
| MRPS9   | -0.605525273 | 5.37579486 | -14.38083933 | 8.84E-35 | 8.38E-33 | 68.33712206 |
| OSCP1   | -0.869691035 | 3.91118601 | -14.37771056 | 9.07E-35 | 8.54E-33 | 68.31231204 |
| HMBS    | -0.983990665 | 3.86219489 | -14.37098592 | 9.57E-35 | 8.96E-33 | 68.2589901  |
| WASHC   | -0.59885085  | 4.89464182 | -14.36201869 | 1.03E-34 | 9.58E-33 | 68.18788978 |
| SRPRB   | -0.899674205 | 5.26095582 | -14.35422144 | 1.09E-34 | 1.01E-32 | 68.1260697  |
| ALDH9A  | -1.058412243 | 7.46017679 | -14.35213807 | 1.11E-34 | 1.03E-32 | 68.10955247 |
| SYTL3   | -1.239576236 | 4.7196463  | -14.35081101 | 1.12E-34 | 1.03E-32 | 68.09903145 |
| MRPL47  | -0.605135907 | 5.8010235  | -14.3222426  | 1.41E-34 | 1.29E-32 | 67.87256348 |
| WWOX    | -1.010629116 | 3.67553789 | -14.31748115 | 1.47E-34 | 1.33E-32 | 67.83482302 |
| ETFA    | -0.753840474 | 4.98433675 | -14.30925192 | 1.57E-34 | 1.41E-32 | 67.76959902 |
| CYB561  | -1.137765172 | 5.6841637  | -14.30741445 | 1.59E-34 | 1.43E-32 | 67.75503605 |
| COMMD   | -0.639432772 | 6.4371579  | -14.29752006 | 1.72E-34 | 1.54E-32 | 67.67662056 |
| SMIM7   | -0.712592811 | 4.84115223 | -14.29457808 | 1.76E-34 | 1.56E-32 | 67.65330575 |
| CLN5    | -1.033028914 | 4.79353398 | -14.28169652 | 1.95E-34 | 1.73E-32 | 67.55122696 |
| GTF2A2  | -0.643502872 | 4.89966702 | -14.27814653 | 2.01E-34 | 1.77E-32 | 67.52309719 |
| COQ9    | -0.807654234 | 5.31667578 | -14.27256376 | 2.10E-34 | 1.84E-32 | 67.47886126 |
| SNX11   | -0.786659202 | 4.71792447 | -14.27134534 | 2.12E-34 | 1.84E-32 | 67.46920717 |
| SDHAF3  | -0.946747437 | 3.77821988 | -14.27097054 | 2.13E-34 | 1.84E-32 | 67.46623751 |
| TPI1    | -0.698206442 | 8.33198786 | -14.25659938 | 2.39E-34 | 2.05E-32 | 67.35237549 |
| BCDIN3  | -0.789642914 | 2.61856095 | -14.25404907 | 2.44E-34 | 2.09E-32 | 67.33217076 |
| TMEM21  | -0.761408949 | 2.80047409 | -14.25049332 | 2.51E-34 | 2.14E-32 | 67.30400124 |

|          |              |            |              |          |          |             |
|----------|--------------|------------|--------------|----------|----------|-------------|
| DAD1     | -0.778899153 | 8.96553363 | -14.24748116 | 2.57E-34 | 2.18E-32 | 67.28013869 |
| FAHD2A   | -0.944186286 | 3.74985354 | -14.23932589 | 2.74E-34 | 2.31E-32 | 67.21553491 |
| TIMM17A  | -0.82105316  | 5.18906605 | -14.23114982 | 2.92E-34 | 2.46E-32 | 67.15077048 |
| PPIL1    | -1.197115249 | 5.49809655 | -14.22941836 | 2.97E-34 | 2.48E-32 | 67.13705573 |
| CA4      | -2.856553469 | 2.9751396  | -14.22790092 | 3.00E-34 | 2.50E-32 | 67.12503637 |
| NDUFAF   | -0.655191534 | 4.887673   | -14.22158268 | 3.16E-34 | 2.61E-32 | 67.07499228 |
| ECHS1    | -0.845863176 | 8.06010338 | -14.20454761 | 3.62E-34 | 2.98E-32 | 66.94007717 |
| AIFM1    | -0.774181179 | 5.00682013 | -14.18455569 | 4.24E-34 | 3.48E-32 | 66.78176737 |
| MRPL22   | -0.50832551  | 3.6933174  | -14.18317458 | 4.29E-34 | 3.50E-32 | 66.77083177 |
| ZSCAN5   | -0.506009299 | 1.38415973 | -14.1826128  | 4.31E-34 | 3.50E-32 | 66.76638366 |
| UQCRB    | -0.723143974 | 5.96193176 | -14.16760074 | 4.86E-34 | 3.92E-32 | 66.64752639 |
| EID2     | -0.634359845 | 4.62281994 | -14.16577779 | 4.93E-34 | 3.96E-32 | 66.63309426 |
| MRPL20   | -0.701302162 | 6.34565744 | -14.15921206 | 5.19E-34 | 4.16E-32 | 66.58111572 |
| CINP     | -0.52801639  | 3.97094176 | -14.15462965 | 5.39E-34 | 4.29E-32 | 66.5448401  |
| PTPMT1   | -0.588625493 | 4.36797702 | -14.15091021 | 5.55E-34 | 4.40E-32 | 66.51539697 |
| CLYBL    | -0.757648561 | 2.30671855 | -14.1499511  | 5.59E-34 | 4.41E-32 | 66.50780479 |
| BCAT2    | -0.772302764 | 4.51732275 | -14.14603133 | 5.77E-34 | 4.51E-32 | 66.47677699 |
| NDUFS2   | -0.727939759 | 6.03062133 | -14.14593745 | 5.77E-34 | 4.51E-32 | 66.47603388 |
| FH       | -0.769292529 | 5.97041425 | -14.13852778 | 6.13E-34 | 4.77E-32 | 66.41738398 |
| CETN2    | -0.853372562 | 6.92373862 | -14.12501277 | 6.82E-34 | 5.29E-32 | 66.31041753 |
| PPIB     | -1.037624889 | 8.88859191 | -14.11687484 | 7.28E-34 | 5.61E-32 | 66.24601458 |
| NEDD8    | -0.679164691 | 5.67030367 | -14.11296284 | 7.51E-34 | 5.77E-32 | 66.21505693 |
| C16orf89 | -2.171029713 | 8.35525466 | -14.10323013 | 8.12E-34 | 6.20E-32 | 66.13804134 |
| LRTOMT   | -0.749552968 | 2.74510147 | -14.09465547 | 8.69E-34 | 6.60E-32 | 66.07019474 |
| MRPS14   | -0.773564514 | 4.96536293 | -14.09430674 | 8.72E-34 | 6.60E-32 | 66.06743552 |
| COA6     | -0.68815233  | 5.08302113 | -14.08684948 | 9.25E-34 | 6.98E-32 | 66.0084345  |
| SEC11C   | -1.052434608 | 5.47066009 | -14.08569912 | 9.34E-34 | 7.01E-32 | 65.99933332 |
| MRPS26   | -0.893197506 | 7.16594764 | -14.08386067 | 9.48E-34 | 7.08E-32 | 65.9847884  |
| SNF8     | -0.570522722 | 5.08339492 | -14.08274169 | 9.56E-34 | 7.11E-32 | 65.97593572 |
| JTB      | -0.704111688 | 7.98604095 | -14.06799534 | 1.08E-33 | 7.97E-32 | 65.85927947 |
| PEF1     | -0.714138384 | 7.72683703 | -14.06695235 | 1.08E-33 | 8.00E-32 | 65.85102911 |
| ATP5ME   | -0.892856927 | 7.94404285 | -14.04962935 | 1.25E-33 | 9.14E-32 | 65.7140097  |
| C1orf122 | -0.948854497 | 5.624044   | -14.04823893 | 1.26E-33 | 9.20E-32 | 65.70301278 |
| SPCS2    | -0.836767708 | 5.62812856 | -14.04469743 | 1.30E-33 | 9.43E-32 | 65.67500357 |
| EMC8     | -0.609988378 | 4.13169601 | -14.04145436 | 1.33E-33 | 9.63E-32 | 65.64935538 |
| TMX2     | -0.890200763 | 6.60329178 | -14.0283989  | 1.47E-33 | 1.06E-31 | 65.54611206 |
| HMOX2    | -0.622318547 | 5.30871317 | -14.02590272 | 1.50E-33 | 1.08E-31 | 65.52637346 |
| BTBD11   | -1.854637724 | 3.31813961 | -14.02062822 | 1.57E-33 | 1.12E-31 | 65.48466681 |
| TMA7     | -0.775143297 | 7.80620719 | -14.01523252 | 1.64E-33 | 1.17E-31 | 65.44200376 |
| FKBP1A   | -0.800709969 | 8.08844688 | -14.01028216 | 1.70E-33 | 1.21E-31 | 65.40286372 |

|          |              |            |              |          |          |             |
|----------|--------------|------------|--------------|----------|----------|-------------|
| MRPS22   | -0.554638081 | 4.01080252 | -14.00869141 | 1.73E-33 | 1.22E-31 | 65.39028687 |
| BCCIP    | -0.639539506 | 5.01831277 | -13.99044374 | 2.00E-33 | 1.40E-31 | 65.24602907 |
| SLC25A3  | -0.961501906 | 2.44898241 | -13.97475761 | 2.26E-33 | 1.59E-31 | 65.12204072 |
| SMIM10L  | -0.660428686 | 4.35957301 | -13.95624253 | 2.62E-33 | 1.83E-31 | 64.97571458 |
| TMEM12   | -0.73205567  | 6.33949265 | -13.9505183  | 2.74E-33 | 1.91E-31 | 64.9304806  |
| PXMP2    | -0.888922946 | 3.86608844 | -13.9437355  | 2.90E-33 | 2.01E-31 | 64.87688475 |
| MRO      | -1.774424494 | 1.38739837 | -13.94056    | 2.97E-33 | 2.05E-31 | 64.85179398 |
| COA4     | -0.641530065 | 5.92611364 | -13.93637557 | 3.07E-33 | 2.11E-31 | 64.81873249 |
| NT5C3B   | -0.910253809 | 5.84410705 | -13.92984443 | 3.24E-33 | 2.21E-31 | 64.76713194 |
| FKBP4    | -0.923646441 | 6.16339964 | -13.91728878 | 3.58E-33 | 2.43E-31 | 64.66794265 |
| PEX11A   | -1.103581354 | 3.6123645  | -13.91716832 | 3.58E-33 | 2.43E-31 | 64.6669911  |
| LDHD     | -1.722975365 | 3.9216153  | -13.8983051  | 4.16E-33 | 2.81E-31 | 64.51799475 |
| SLC25A3  | -0.645911793 | 7.20736545 | -13.89154131 | 4.39E-33 | 2.95E-31 | 64.46457569 |
| RPP25L   | -0.75606044  | 5.76682524 | -13.89118604 | 4.40E-33 | 2.95E-31 | 64.46176988 |
| GCDH     | -0.674450731 | 4.03312053 | -13.86715728 | 5.33E-33 | 3.56E-31 | 64.27202457 |
| SULT1A1  | -1.344963513 | 3.73833359 | -13.86040119 | 5.62E-33 | 3.73E-31 | 64.21868249 |
| MRPL24   | -0.655490506 | 6.59765987 | -13.86023554 | 5.63E-33 | 3.73E-31 | 64.21737465 |
| DSTN     | -0.828985116 | 8.12823009 | -13.85758439 | 5.75E-33 | 3.80E-31 | 64.19644378 |
| WSCD2    | -2.624189402 | 2.1006274  | -13.84518376 | 6.35E-33 | 4.17E-31 | 64.09854784 |
| NCBP2A   | -0.750789157 | 5.54409176 | -13.84082168 | 6.57E-33 | 4.30E-31 | 64.06411458 |
| RAB5IF   | -0.778809687 | 4.74779148 | -13.83199237 | 7.05E-33 | 4.59E-31 | 63.99442259 |
| 2-Mar    | -1.370274026 | 4.86477063 | -13.83180385 | 7.06E-33 | 4.59E-31 | 63.99293459 |
| MOCS2    | -0.684872385 | 4.7880034  | -13.82933126 | 7.20E-33 | 4.66E-31 | 63.97341898 |
| FAM104E  | -0.686366926 | 3.85372317 | -13.82139799 | 7.67E-33 | 4.95E-31 | 63.91080657 |
| CYB5D2   | -0.95898822  | 5.43566305 | -13.82011843 | 7.75E-33 | 4.98E-31 | 63.90070829 |
| GTF2H5   | -0.569026771 | 3.86269757 | -13.8162955  | 7.99E-33 | 5.11E-31 | 63.87053848 |
| NFU1     | -0.658289521 | 5.45030823 | -13.80616241 | 8.66E-33 | 5.52E-31 | 63.79057573 |
| ATP5F1A  | -0.828852245 | 6.98274551 | -13.79389666 | 9.55E-33 | 6.04E-31 | 63.69379469 |
| APOM     | -0.822129556 | 2.71194961 | -13.79388321 | 9.55E-33 | 6.04E-31 | 63.69368856 |
| COMMD1   | -0.659586964 | 5.18038366 | -13.7819526  | 1.05E-32 | 6.62E-31 | 63.59956354 |
| UQCR11   | -0.779848912 | 6.48644433 | -13.77976764 | 1.07E-32 | 6.71E-31 | 63.58232683 |
| VPS25    | -0.713416927 | 5.65009941 | -13.7667375  | 1.19E-32 | 7.42E-31 | 63.4795429  |
| MTX2     | -0.731141999 | 5.69431519 | -13.76277342 | 1.22E-32 | 7.63E-31 | 63.44827629 |
| C9orf116 | -1.059541595 | 3.12444307 | -13.73476722 | 1.53E-32 | 9.50E-31 | 63.22741522 |
| DHRS7    | -0.962312447 | 6.54150841 | -13.72902924 | 1.60E-32 | 9.90E-31 | 63.18217278 |
| LYRM4    | -0.657558006 | 3.23603974 | -13.7239501  | 1.67E-32 | 1.03E-30 | 63.14212739 |
| KATNALB  | -1.436743456 | 2.4228608  | -13.70582657 | 1.92E-32 | 1.18E-30 | 62.99925401 |
| PDHB     | -0.580677887 | 5.22911349 | -13.70325617 | 1.96E-32 | 1.20E-30 | 62.97899297 |
| ATP5MD   | -0.723481631 | 7.4044699  | -13.69963679 | 2.02E-32 | 1.23E-30 | 62.95046442 |
| ESAM     | -1.281323834 | 7.14347879 | -13.69951762 | 2.02E-32 | 1.23E-30 | 62.94952513 |

|         |              |            |              |          |          |             |
|---------|--------------|------------|--------------|----------|----------|-------------|
| SURF1   | -0.782515483 | 6.41713862 | -13.6813681  | 2.34E-32 | 1.42E-30 | 62.80648473 |
| ACSF2   | -1.125901602 | 5.2458958  | -13.67801907 | 2.40E-32 | 1.45E-30 | 62.78009339 |
| HSPA5   | -1.475377759 | 9.66959932 | -13.6655054  | 2.65E-32 | 1.59E-30 | 62.68149046 |
| RILP    | -0.878608702 | 5.44060578 | -13.65888735 | 2.79E-32 | 1.67E-30 | 62.62934831 |
| YIPF1   | -1.051782744 | 5.95372122 | -13.65509471 | 2.88E-32 | 1.72E-30 | 62.59946866 |
| PIH1D2  | -0.770692314 | 2.27851454 | -13.63574424 | 3.36E-32 | 2.00E-30 | 62.44703892 |
| MRPL13  | -0.654593084 | 4.00968179 | -13.63467364 | 3.39E-32 | 2.01E-30 | 62.43860648 |
| COMMD1  | -0.842872057 | 4.61481014 | -13.62661519 | 3.61E-32 | 2.13E-30 | 62.37513806 |
| ACYP2   | -0.685321477 | 3.14218631 | -13.60335593 | 4.34E-32 | 2.56E-30 | 62.19198033 |
| MRPL51  | -0.66521736  | 7.33841674 | -13.59659967 | 4.58E-32 | 2.69E-30 | 62.13878651 |
| MTX1    | -0.593349085 | 3.80004529 | -13.59351027 | 4.70E-32 | 2.75E-30 | 62.11446418 |
| CFAP53  | -0.942073921 | 2.95188416 | -13.59170955 | 4.76E-32 | 2.78E-30 | 62.10028781 |
| XPA     | -0.906070855 | 5.19976792 | -13.59110926 | 4.79E-32 | 2.78E-30 | 62.09556208 |
| STMP1   | -0.701431462 | 5.17774476 | -13.58350918 | 5.08E-32 | 2.94E-30 | 62.03573327 |
| SMDT1   | -0.863429564 | 6.76937984 | -13.56828837 | 5.74E-32 | 3.31E-30 | 61.91592896 |
| TXNL1   | -0.873968156 | 5.47311322 | -13.56784964 | 5.76E-32 | 3.31E-30 | 61.91247603 |
| MTIF3   | -0.611224463 | 5.993219   | -13.56575139 | 5.85E-32 | 3.35E-30 | 61.89596223 |
| SULT1A2 | -1.543366081 | 2.72125052 | -13.56412573 | 5.93E-32 | 3.39E-30 | 61.88316821 |
| MRPL34  | -0.802881428 | 6.23873835 | -13.56123518 | 6.07E-32 | 3.45E-30 | 61.86041993 |
| PRDX2   | -0.725893852 | 8.13997691 | -13.55653878 | 6.30E-32 | 3.57E-30 | 61.82346145 |
| COPZ2   | -1.240011048 | 4.59477975 | -13.54529382 | 6.89E-32 | 3.89E-30 | 61.73497725 |
| ARHGAP  | -1.670953116 | 2.95003329 | -13.53204063 | 7.65E-32 | 4.31E-30 | 61.63070567 |
| MDP1    | -0.719885731 | 2.86151659 | -13.51476407 | 8.77E-32 | 4.93E-30 | 61.49480429 |
| PPCS    | -0.665408337 | 6.13867072 | -13.51190397 | 8.97E-32 | 5.02E-30 | 61.47230882 |
| CNPPD1  | -0.712333069 | 6.87539597 | -13.50983307 | 9.12E-32 | 5.09E-30 | 61.45602111 |
| SLC25A4 | -1.179143039 | 4.89782424 | -13.5040618  | 9.55E-32 | 5.31E-30 | 61.41063186 |
| DNAJC1  | -0.59101638  | 4.4908446  | -13.49686406 | 1.01E-31 | 5.60E-30 | 61.35402833 |
| EEF1AK1 | -0.659681328 | 4.1352457  | -13.48958878 | 1.07E-31 | 5.92E-30 | 61.29682012 |
| TMEM25  | -0.768980461 | 4.83486525 | -13.48017282 | 1.15E-31 | 6.35E-30 | 61.22278629 |
| IFT22   | -0.701534942 | 5.06414901 | -13.47994236 | 1.16E-31 | 6.35E-30 | 61.22097439 |
| PDRG1   | -0.694398419 | 4.84936505 | -13.47767785 | 1.18E-31 | 6.44E-30 | 61.20317086 |
| GNA14   | -1.889067638 | 3.63111054 | -13.47358417 | 1.22E-31 | 6.63E-30 | 61.17098756 |
| TXN2    | -0.673618332 | 7.02093004 | -13.46716933 | 1.28E-31 | 6.96E-30 | 61.12055931 |
| C3orf33 | -0.997332317 | 3.92070933 | -13.46530222 | 1.30E-31 | 7.04E-30 | 61.10588234 |
| FAM167A | -2.849215159 | 4.61370037 | -13.45555874 | 1.40E-31 | 7.58E-30 | 61.02929629 |
| MTFR1L  | -0.693680357 | 5.12697298 | -13.45336406 | 1.43E-31 | 7.69E-30 | 61.01204693 |
| SF3B5   | -0.70487499  | 8.21622744 | -13.44604569 | 1.51E-31 | 8.12E-30 | 60.95453046 |
| LAMTOR  | -0.536706589 | 6.35793172 | -13.43527108 | 1.65E-31 | 8.82E-30 | 60.86986022 |
| ATOX1   | -0.835941248 | 4.81231179 | -13.42566485 | 1.78E-31 | 9.48E-30 | 60.79438111 |
| KIF9    | -0.800259545 | 3.09159727 | -13.4118367  | 1.98E-31 | 1.05E-29 | 60.68574502 |

|          |              |            |              |          |          |             |
|----------|--------------|------------|--------------|----------|----------|-------------|
| C3orf18  | -0.868139091 | 3.71108268 | -13.40741293 | 2.05E-31 | 1.09E-29 | 60.65099524 |
| MRPS36   | -0.638406257 | 5.61701212 | -13.3916021  | 2.33E-31 | 1.23E-29 | 60.52681313 |
| CDADC1   | -0.882098732 | 3.24791618 | -13.38893829 | 2.38E-31 | 1.25E-29 | 60.50589343 |
| NDUFAB   | -0.728763614 | 6.41040981 | -13.38589583 | 2.44E-31 | 1.28E-29 | 60.48200086 |
| ECSIT    | -0.811028506 | 5.34844161 | -13.38117917 | 2.53E-31 | 1.32E-29 | 60.44496264 |
| TOMM5    | -0.599062967 | 3.69188581 | -13.37937941 | 2.57E-31 | 1.34E-29 | 60.43083032 |
| MIEN1    | -0.621870681 | 6.08285489 | -13.35680499 | 3.07E-31 | 1.60E-29 | 60.25359668 |
| CENPS    | -0.714365074 | 3.10555047 | -13.3452493  | 3.36E-31 | 1.74E-29 | 60.16289204 |
| CRELD1   | -1.067366355 | 5.87690738 | -13.33608784 | 3.61E-31 | 1.87E-29 | 60.09099026 |
| CAPSL    | -2.090945411 | 2.01489069 | -13.33281363 | 3.71E-31 | 1.91E-29 | 60.06529539 |
| DHRS7B   | -0.673987954 | 4.45125444 | -13.33082052 | 3.77E-31 | 1.94E-29 | 60.04965474 |
| TRIP4    | -0.770837694 | 4.98422481 | -13.3252984  | 3.94E-31 | 2.02E-29 | 60.00632269 |
| ERI3     | -0.616764453 | 5.69077116 | -13.31091197 | 4.41E-31 | 2.25E-29 | 59.89344742 |
| SRP19    | -0.632848321 | 4.47948309 | -13.30722589 | 4.54E-31 | 2.31E-29 | 59.86453005 |
| SDHD     | -0.880237014 | 6.36841937 | -13.30059802 | 4.79E-31 | 2.43E-29 | 59.81253783 |
| TMEM14   | -0.611364602 | 7.96161975 | -13.28291853 | 5.50E-31 | 2.79E-29 | 59.67387399 |
| SFXN4    | -0.874475819 | 5.28811971 | -13.28020943 | 5.62E-31 | 2.84E-29 | 59.65262884 |
| AK6      | -0.639405438 | 4.84143169 | -13.26186983 | 6.50E-31 | 3.27E-29 | 59.50882774 |
| SDHB     | -0.608637712 | 6.11006958 | -13.25480328 | 6.88E-31 | 3.45E-29 | 59.45342828 |
| NDUFV3   | -0.553717616 | 4.49888601 | -13.24875502 | 7.21E-31 | 3.61E-29 | 59.40601624 |
| MTHFS    | -0.831895972 | 3.48486917 | -13.23462171 | 8.06E-31 | 4.02E-29 | 59.29524101 |
| PIR      | -1.218107452 | 3.37381929 | -13.23230188 | 8.21E-31 | 4.09E-29 | 59.27706052 |
| TMCO1    | -0.787874699 | 5.61940899 | -13.23129143 | 8.28E-31 | 4.11E-29 | 59.26914185 |
| COA3     | -0.662004127 | 6.27305979 | -13.22652006 | 8.60E-31 | 4.25E-29 | 59.23175095 |
| TMEM11   | -0.560913766 | 4.58294801 | -13.22317485 | 8.83E-31 | 4.35E-29 | 59.20553774 |
| OXSM     | -0.617670588 | 3.72059366 | -13.21237939 | 9.61E-31 | 4.73E-29 | 59.12095211 |
| ATP5IF1  | -0.728029114 | 7.53540524 | -13.18906347 | 1.16E-30 | 5.67E-29 | 58.9383085  |
| FAAH     | -1.038951478 | 5.47178656 | -13.18312777 | 1.21E-30 | 5.92E-29 | 58.89182117 |
| OAZ2     | -0.775486244 | 5.54651173 | -13.17465799 | 1.30E-30 | 6.31E-29 | 58.82549411 |
| ECI1     | -0.991335135 | 6.64313829 | -13.16803437 | 1.36E-30 | 6.62E-29 | 58.7736299  |
| DERL2    | -0.721298983 | 4.62186259 | -13.1678617  | 1.37E-30 | 6.62E-29 | 58.77227795 |
| TFF3     | -3.879491737 | 5.47456694 | -13.16515094 | 1.40E-30 | 6.73E-29 | 58.75105365 |
| CHCHD2   | -0.726394135 | 8.79956232 | -13.16510277 | 1.40E-30 | 6.73E-29 | 58.75067649 |
| B9D1     | -0.845472084 | 4.75697373 | -13.16443918 | 1.40E-30 | 6.75E-29 | 58.74548095 |
| MRPL2    | -0.54872934  | 5.19848948 | -13.15692403 | 1.49E-30 | 7.14E-29 | 58.68664489 |
| C16orf91 | -0.750710766 | 4.64239816 | -13.14037499 | 1.70E-30 | 8.11E-29 | 58.5571048  |
| PREB     | -0.581695295 | 5.43679822 | -13.13349624 | 1.79E-30 | 8.54E-29 | 58.50326939 |
| ABCB8    | -0.671295803 | 3.78552378 | -13.11437483 | 2.08E-30 | 9.90E-29 | 58.35364709 |
| TSR2     | -0.671148512 | 7.2512592  | -13.11244532 | 2.12E-30 | 1.00E-28 | 58.3385512  |
| PNPLA4   | -0.934886699 | 4.70422287 | -13.09835239 | 2.37E-30 | 1.12E-28 | 58.22830584 |

|         |              |            |              |          |          |             |
|---------|--------------|------------|--------------|----------|----------|-------------|
| POLR2K  | -0.604161913 | 6.08430969 | -13.0950836  | 2.43E-30 | 1.14E-28 | 58.20273823 |
| SRA1    | -0.612527142 | 5.33353326 | -13.09307961 | 2.47E-30 | 1.16E-28 | 58.18706406 |
| AAMDC   | -0.823252586 | 4.71088037 | -13.08483485 | 2.63E-30 | 1.23E-28 | 58.12258305 |
| NDUFA1  | -0.582214839 | 4.72494421 | -13.07823119 | 2.77E-30 | 1.30E-28 | 58.07094241 |
| HINT1   | -0.779347873 | 8.26838313 | -13.07669691 | 2.81E-30 | 1.31E-28 | 58.0589451  |
| HACL1   | -0.744318086 | 4.50981773 | -13.07524744 | 2.84E-30 | 1.32E-28 | 58.04761117 |
| MRPL21  | -0.725152091 | 5.19212907 | -13.05598108 | 3.30E-30 | 1.53E-28 | 57.89698397 |
| UCHL3   | -0.672419584 | 4.03496044 | -13.05546576 | 3.32E-30 | 1.53E-28 | 57.8929557  |
| PGP     | -0.752374811 | 4.71464482 | -13.04135259 | 3.71E-30 | 1.71E-28 | 57.78264527 |
| PSMC4   | -0.571387505 | 6.84912287 | -13.02593481 | 4.19E-30 | 1.92E-28 | 57.66216472 |
| CENPS   | -0.50834287  | 1.02594468 | -13.01676706 | 4.50E-30 | 2.06E-28 | 57.59053765 |
| CCDC51  | -0.700634566 | 4.0346608  | -13.01602852 | 4.53E-30 | 2.07E-28 | 57.58476787 |
| ANAPC1  | -0.582725779 | 6.59422746 | -13.00478674 | 4.95E-30 | 2.26E-28 | 57.49695129 |
| MDH2    | -0.818014311 | 6.98189711 | -12.99733508 | 5.25E-30 | 2.39E-28 | 57.43874997 |
| SPCS1   | -0.694599147 | 6.02124179 | -12.99622278 | 5.29E-30 | 2.40E-28 | 57.43006287 |
| SPATA4  | -0.706066415 | 0.85494791 | -12.99229117 | 5.46E-30 | 2.47E-28 | 57.39935823 |
| FARS2   | -0.769405957 | 4.5605683  | -12.99106307 | 5.51E-30 | 2.49E-28 | 57.38976755 |
| CISD2   | -0.691556416 | 5.30706083 | -12.97981153 | 6.02E-30 | 2.71E-28 | 57.30190833 |
| PDCD6   | -0.609171463 | 4.80388654 | -12.97512838 | 6.25E-30 | 2.80E-28 | 57.26534392 |
| SLC39A7 | -0.984148312 | 7.59812346 | -12.97373301 | 6.32E-30 | 2.83E-28 | 57.2544498  |
| MRPL36  | -0.562669663 | 4.80667798 | -12.97197038 | 6.41E-30 | 2.86E-28 | 57.2406888  |
| CAMKM1  | -0.608517191 | 2.77871877 | -12.97068095 | 6.47E-30 | 2.88E-28 | 57.23062226 |
| MRPL58  | -0.546158686 | 5.53780681 | -12.96980952 | 6.52E-30 | 2.89E-28 | 57.22381919 |
| ETFRF1  | -0.750236718 | 4.87775796 | -12.96012328 | 7.03E-30 | 3.11E-28 | 57.14820698 |
| TMEM50  | -1.09130813  | 6.18739685 | -12.95674064 | 7.22E-30 | 3.19E-28 | 57.12180423 |
| PTGES2  | -0.616695173 | 5.65808245 | -12.95300468 | 7.44E-30 | 3.28E-28 | 57.09264537 |
| FKBP2   | -0.983647336 | 7.94539534 | -12.95060688 | 7.58E-30 | 3.33E-28 | 57.0739317  |
| GSTK1   | -0.634236752 | 6.52309943 | -12.94050078 | 8.21E-30 | 3.60E-28 | 56.99506595 |
| PDHA1   | -0.675977464 | 5.78268975 | -12.93559358 | 8.53E-30 | 3.73E-28 | 56.95677574 |
| MRPS10  | -0.688288222 | 5.5546206  | -12.92539012 | 9.24E-30 | 4.03E-28 | 56.87716923 |
| MCRIP2  | -1.038963686 | 4.08289526 | -12.92474096 | 9.29E-30 | 4.04E-28 | 56.87210496 |
| PKIG    | -0.689977973 | 6.35766374 | -12.90853539 | 1.06E-29 | 4.58E-28 | 56.74569825 |
| LMAN2L  | -0.899514119 | 5.23739009 | -12.90307154 | 1.10E-29 | 4.77E-28 | 56.70308646 |
| COX4I1  | -0.687117891 | 7.65402572 | -12.88969596 | 1.22E-29 | 5.28E-28 | 56.59878808 |
| BORCS7  | -0.877177436 | 6.00060025 | -12.887081   | 1.25E-29 | 5.38E-28 | 56.57840012 |
| OCIAD1  | -0.769114595 | 6.63748362 | -12.88486816 | 1.27E-29 | 5.46E-28 | 56.56114801 |
| BDH1    | -0.911109672 | 3.42138668 | -12.87748098 | 1.35E-29 | 5.77E-28 | 56.50355935 |
| UQCRRF5 | -0.832358326 | 5.27810178 | -12.87657432 | 1.36E-29 | 5.80E-28 | 56.49649172 |
| IDNK    | -0.766017757 | 3.64646235 | -12.87102115 | 1.42E-29 | 6.04E-28 | 56.4532057  |
| MPDU1   | -0.633501621 | 5.83338513 | -12.85708302 | 1.58E-29 | 6.73E-28 | 56.34457769 |

|          |              |            |              |          |          |             |
|----------|--------------|------------|--------------|----------|----------|-------------|
| TLE6     | -1.213974819 | 2.80124482 | -12.85581861 | 1.60E-29 | 6.78E-28 | 56.33472466 |
| MON1A    | -0.684249794 | 3.45370845 | -12.84522495 | 1.74E-29 | 7.35E-28 | 56.25218024 |
| MLEC     | -1.059045079 | 6.97316051 | -12.84436721 | 1.75E-29 | 7.38E-28 | 56.24549752 |
| HSPE1    | -0.678503212 | 6.24434184 | -12.83790781 | 1.84E-29 | 7.74E-28 | 56.19517454 |
| MRPL33   | -0.784143611 | 5.73902927 | -12.83737288 | 1.85E-29 | 7.75E-28 | 56.19100727 |
| MRPL32   | -0.616794551 | 4.8713023  | -12.81826966 | 2.15E-29 | 8.99E-28 | 56.04221336 |
| MAP1LC   | -1.188690977 | 4.97011908 | -12.80815726 | 2.32E-29 | 9.71E-28 | 55.96346751 |
| NAA20    | -0.628278902 | 6.14930666 | -12.80738548 | 2.34E-29 | 9.74E-28 | 55.95745819 |
| NDFIP1   | -0.871084289 | 7.21286579 | -12.80433144 | 2.39E-29 | 9.95E-28 | 55.9336791  |
| HYKK     | -0.556186796 | 1.39331049 | -12.80147024 | 2.45E-29 | 1.02E-27 | 55.91140267 |
| PNKD     | -0.638128399 | 5.72088398 | -12.80000021 | 2.48E-29 | 1.02E-27 | 55.89995786 |
| SH3BGR   | -1.10064149  | 4.02455213 | -12.79779573 | 2.52E-29 | 1.04E-27 | 55.88279554 |
| ASRGL1   | -0.965730034 | 2.52373    | -12.79583789 | 2.56E-29 | 1.05E-27 | 55.86755386 |
| ADAL     | -0.805923308 | 2.79843461 | -12.78668216 | 2.75E-29 | 1.13E-27 | 55.79628399 |
| ATP6V0E  | -0.689170421 | 6.67890395 | -12.78325057 | 2.83E-29 | 1.16E-27 | 55.76957465 |
| CHCHD5   | -0.674030234 | 4.36591192 | -12.78275932 | 2.84E-29 | 1.16E-27 | 55.76575118 |
| NDUFA9   | -0.501240974 | 3.48428123 | -12.78047707 | 2.89E-29 | 1.18E-27 | 55.74798859 |
| IMMP1L   | -0.535357744 | 3.2558588  | -12.7789348  | 2.92E-29 | 1.19E-27 | 55.73598558 |
| RTN3     | -0.842439384 | 7.10707411 | -12.77286587 | 3.07E-29 | 1.24E-27 | 55.68875614 |
| POLD2    | -0.732810734 | 5.62961163 | -12.76825864 | 3.18E-29 | 1.29E-27 | 55.65290512 |
| ENY2     | -0.58275877  | 4.22816356 | -12.76681224 | 3.22E-29 | 1.30E-27 | 55.64165064 |
| SNX17    | -0.708397559 | 6.7178386  | -12.76236221 | 3.33E-29 | 1.34E-27 | 55.60702639 |
| DNAL4    | -0.760964096 | 5.39584837 | -12.7603305  | 3.38E-29 | 1.36E-27 | 55.59121918 |
| PINX1    | -0.504186668 | 2.14856635 | -12.75500795 | 3.53E-29 | 1.41E-27 | 55.54981101 |
| TMED9    | -0.687624673 | 7.76046783 | -12.75491274 | 3.53E-29 | 1.41E-27 | 55.54907035 |
| MMP15    | -1.251413733 | 6.86906579 | -12.74832543 | 3.72E-29 | 1.48E-27 | 55.49782793 |
| C20orf96 | -0.890262259 | 4.67405322 | -12.74650748 | 3.77E-29 | 1.50E-27 | 55.48368718 |
| RDH11    | -0.836730341 | 5.82473417 | -12.73768132 | 4.04E-29 | 1.61E-27 | 55.41504011 |
| MED19    | -0.743010924 | 4.34935297 | -12.736707   | 4.07E-29 | 1.61E-27 | 55.40746284 |
| TIMM17E  | -0.828286512 | 5.1201231  | -12.72980766 | 4.30E-29 | 1.70E-27 | 55.35381008 |
| MRPS34   | -0.731416561 | 7.16117208 | -12.72926009 | 4.32E-29 | 1.70E-27 | 55.34955222 |
| EMC7     | -0.624510987 | 7.03872348 | -12.72803877 | 4.36E-29 | 1.72E-27 | 55.34005532 |
| TCF7L1   | -1.625245324 | 3.59398016 | -12.72761444 | 4.37E-29 | 1.72E-27 | 55.33675586 |
| NDUFS6   | -0.74828129  | 6.65310049 | -12.72629311 | 4.42E-29 | 1.73E-27 | 55.32648167 |
| NFS1     | -0.591965865 | 3.3701327  | -12.71586601 | 4.80E-29 | 1.87E-27 | 55.24541244 |
| UBE2D2   | -0.593811593 | 6.3227041  | -12.70725557 | 5.13E-29 | 2.00E-27 | 55.17847848 |
| AACS     | -0.693899992 | 2.75623125 | -12.70214819 | 5.34E-29 | 2.08E-27 | 55.13878062 |
| ERP29    | -0.688457725 | 7.69306889 | -12.70151531 | 5.37E-29 | 2.08E-27 | 55.13386172 |
| SPATA1   | -0.605313039 | 1.13103053 | -12.69825463 | 5.51E-29 | 2.13E-27 | 55.10851979 |
| MCRS1    | -0.596644449 | 6.03771508 | -12.69812913 | 5.51E-29 | 2.13E-27 | 55.1075444  |

|          |              |            |              |          |          |             |
|----------|--------------|------------|--------------|----------|----------|-------------|
| PMVK     | -0.726755248 | 7.00529718 | -12.69560195 | 5.62E-29 | 2.16E-27 | 55.08790425 |
| TACO1    | -0.556132983 | 4.48968408 | -12.69548275 | 5.63E-29 | 2.16E-27 | 55.08697786 |
| NELFCD   | -0.738307002 | 5.12231649 | -12.69235648 | 5.77E-29 | 2.21E-27 | 55.06268308 |
| NMNAT1   | -0.773756906 | 3.47280288 | -12.68694891 | 6.02E-29 | 2.30E-27 | 55.02066303 |
| PRRG2    | -0.869265165 | 5.0490179  | -12.68083387 | 6.31E-29 | 2.41E-27 | 54.97315033 |
| POLR3G   | -0.74577455  | 5.76853955 | -12.673473   | 6.69E-29 | 2.55E-27 | 54.91596456 |
| LGI3     | -2.088777166 | 3.30157921 | -12.67042237 | 6.85E-29 | 2.60E-27 | 54.89226671 |
| SHLD1    | -0.645424383 | 3.63362912 | -12.67009551 | 6.87E-29 | 2.60E-27 | 54.88972769 |
| SLC4A4   | -2.226408684 | 2.91563942 | -12.66377309 | 7.21E-29 | 2.73E-27 | 54.84061845 |
| ETFB     | -0.845626335 | 5.11235777 | -12.66337008 | 7.24E-29 | 2.73E-27 | 54.83748828 |
| MANBAL   | -0.735049931 | 6.69877261 | -12.66317411 | 7.25E-29 | 2.73E-27 | 54.83596614 |
| OARD1    | -0.688497536 | 4.15202083 | -12.6622175  | 7.30E-29 | 2.75E-27 | 54.82853626 |
| RUVBL1   | -0.608119784 | 3.92478799 | -12.65894664 | 7.49E-29 | 2.81E-27 | 54.80313279 |
| SMIM8    | -0.443281811 | 1.72586857 | -12.6564956  | 7.64E-29 | 2.86E-27 | 54.78409748 |
| IAH1     | -0.571643661 | 4.27505498 | -12.64604415 | 8.29E-29 | 3.10E-27 | 54.70293873 |
| MT1F     | -2.837154931 | 6.36093613 | -12.63647986 | 8.93E-29 | 3.33E-27 | 54.62868229 |
| SELENBI  | -1.226172609 | 7.14988289 | -12.6326984  | 9.20E-29 | 3.42E-27 | 54.59932685 |
| GRPEL1   | -0.527674161 | 4.23409739 | -12.62838075 | 9.52E-29 | 3.53E-27 | 54.56581136 |
| ST7      | -0.697459326 | 4.10877511 | -12.61903252 | 1.02E-28 | 3.79E-27 | 54.49325537 |
| SLC5A8   | -2.796601884 | 2.98240026 | -12.61048195 | 1.10E-28 | 4.05E-27 | 54.42690107 |
| PRPSAP   | -0.809393961 | 4.50898287 | -12.60569784 | 1.14E-28 | 4.19E-27 | 54.3897798  |
| ATPAF1   | -0.56529389  | 5.10492375 | -12.60368375 | 1.15E-28 | 4.25E-27 | 54.37415288 |
| SOD1     | -0.674676555 | 8.13408657 | -12.59844112 | 1.20E-28 | 4.42E-27 | 54.33347908 |
| C11orf65 | -0.409885553 | 0.85944277 | -12.59065053 | 1.28E-28 | 4.69E-27 | 54.27304471 |
| NDUFB1   | -0.76323189  | 7.79318347 | -12.58403268 | 1.35E-28 | 4.92E-27 | 54.22171437 |
| MED11    | -0.555014668 | 5.25417118 | -12.56930635 | 1.51E-28 | 5.51E-27 | 54.10751442 |
| INAFM2   | -1.186148827 | 6.60482434 | -12.56838024 | 1.52E-28 | 5.54E-27 | 54.1003336  |
| COPS3    | -0.618979385 | 5.48185268 | -12.56121521 | 1.61E-28 | 5.84E-27 | 54.0447823  |
| ISOC2    | -0.884719061 | 4.88636037 | -12.56101926 | 1.61E-28 | 5.84E-27 | 54.04326316 |
| MESD     | -0.810157331 | 5.77022057 | -12.55988978 | 1.63E-28 | 5.88E-27 | 54.03450682 |
| EPHX1    | -1.088817202 | 7.16852777 | -12.55651143 | 1.67E-28 | 6.03E-27 | 54.00831733 |
| ACAD10   | -0.792333824 | 3.68707629 | -12.55064628 | 1.75E-28 | 6.30E-27 | 53.96285356 |
| DHRS4    | -0.666588094 | 3.89404402 | -12.53477202 | 1.98E-28 | 7.12E-27 | 53.83982903 |
| NDUFA2   | -0.750070062 | 6.91343933 | -12.53363539 | 2.00E-28 | 7.16E-27 | 53.83102163 |
| PDIA5    | -1.211886952 | 4.72450028 | -12.53010388 | 2.05E-28 | 7.35E-27 | 53.80365817 |
| TMEM16   | -0.910132395 | 5.01469664 | -12.52870017 | 2.08E-28 | 7.41E-27 | 53.79278225 |
| FHL1     | -2.188834007 | 6.1969674  | -12.52764898 | 2.09E-28 | 7.46E-27 | 53.78463783 |
| C16orf46 | -1.019799137 | 2.74166341 | -12.52626608 | 2.12E-28 | 7.51E-27 | 53.7739236  |
| DCXR     | -1.075031056 | 6.02898771 | -12.52621138 | 2.12E-28 | 7.51E-27 | 53.77349979 |
| MRPS18   | -0.495518714 | 3.05468391 | -12.5245669  | 2.14E-28 | 7.59E-27 | 53.76075933 |



|          |              |            |              |          |          |             |
|----------|--------------|------------|--------------|----------|----------|-------------|
| CCDC13   | -0.430985048 | 0.83986751 | -12.52082889 | 2.21E-28 | 7.80E-27 | 53.73180079 |
| NME5     | -0.719018573 | 3.8912597  | -12.50251811 | 2.55E-28 | 8.98E-27 | 53.5899761  |
| TM2D2    | -0.768902028 | 5.06745169 | -12.49832076 | 2.63E-28 | 9.26E-27 | 53.55747284 |
| CXorf40A | -0.650362088 | 3.22243113 | -12.4941173  | 2.72E-28 | 9.55E-27 | 53.52492479 |
| TEX264   | -0.6245419   | 5.47149395 | -12.49215253 | 2.76E-28 | 9.68E-27 | 53.50971221 |
| P3H4     | -0.766704625 | 4.89798762 | -12.48947973 | 2.82E-28 | 9.87E-27 | 53.48901841 |
| ATG10    | -0.673342156 | 2.70088098 | -12.48108315 | 3.01E-28 | 1.05E-26 | 53.42401598 |
| TMEM22   | -1.097750965 | 3.16226318 | -12.47820518 | 3.08E-28 | 1.07E-26 | 53.40173843 |
| METTL5   | -0.545621831 | 4.79302045 | -12.46556098 | 3.40E-28 | 1.18E-26 | 53.30387799 |
| ANXA6    | -0.950510258 | 6.42508621 | -12.46436781 | 3.43E-28 | 1.19E-26 | 53.29464461 |
| OSTC     | -0.751614238 | 6.85174626 | -12.4618741  | 3.50E-28 | 1.21E-26 | 53.27534773 |
| GIN1     | -0.575912334 | 2.62789891 | -12.4618168  | 3.50E-28 | 1.21E-26 | 53.27490434 |
| GSTZ1    | -0.670288347 | 3.39944353 | -12.46081574 | 3.53E-28 | 1.22E-26 | 53.2671581  |
| SUB1     | -0.572991943 | 5.10815959 | -12.45864735 | 3.59E-28 | 1.23E-26 | 53.25037967 |
| NAA38    | -0.798940529 | 6.02283186 | -12.45198123 | 3.78E-28 | 1.30E-26 | 53.1988034  |
| TIMM23   | -0.547292075 | 6.90543051 | -12.45143769 | 3.80E-28 | 1.30E-26 | 53.19459822 |
| RIBC1    | -0.793012677 | 2.35641664 | -12.45120545 | 3.80E-28 | 1.30E-26 | 53.19280156 |
| SRP14    | -0.618071678 | 8.78826346 | -12.44318317 | 4.05E-28 | 1.38E-26 | 53.1307423  |
| SDHAF1   | -0.753379264 | 5.27773504 | -12.43955732 | 4.17E-28 | 1.42E-26 | 53.10269637 |
| IFT20    | -0.651882856 | 4.48294335 | -12.43818878 | 4.21E-28 | 1.43E-26 | 53.0921112  |
| SORBS2   | -1.796464954 | 4.51143968 | -12.43663787 | 4.26E-28 | 1.45E-26 | 53.08011589 |
| COASY    | -0.622749306 | 6.01079997 | -12.4288346  | 4.53E-28 | 1.53E-26 | 53.0197678  |
| NAXD     | -0.742405895 | 5.93861376 | -12.42514498 | 4.66E-28 | 1.58E-26 | 52.9912366  |
| RGCC     | -1.54997371  | 7.17016973 | -12.42222536 | 4.77E-28 | 1.61E-26 | 52.96866121 |
| ALG5     | -0.751064377 | 6.01654345 | -12.41717982 | 4.96E-28 | 1.67E-26 | 52.92965046 |
| ILVBL    | -0.833438851 | 5.83425614 | -12.41274347 | 5.14E-28 | 1.72E-26 | 52.89535305 |
| AAGAB    | -0.750540922 | 5.32002829 | -12.41152556 | 5.18E-28 | 1.74E-26 | 52.88593796 |
| MYT1     | -0.740894797 | 0.99037148 | -12.40378833 | 5.51E-28 | 1.84E-26 | 52.82613004 |
| RWDD4    | -0.703955136 | 3.83433671 | -12.39435529 | 5.93E-28 | 1.98E-26 | 52.75322599 |
| SEPHS2   | -0.664184493 | 6.28943608 | -12.38791542 | 6.23E-28 | 2.08E-26 | 52.70346278 |
| UGP2     | -0.725988855 | 5.42390572 | -12.38472574 | 6.39E-28 | 2.13E-26 | 52.67881735 |
| NBDY     | -0.640952118 | 6.53036275 | -12.36424879 | 7.50E-28 | 2.49E-26 | 52.52063683 |
| RMDN1    | -0.715768026 | 4.64685745 | -12.36303425 | 7.57E-28 | 2.51E-26 | 52.51125679 |
| GSTM4    | -0.842414604 | 4.300637   | -12.3515886  | 8.27E-28 | 2.74E-26 | 52.42287182 |
| NAXE     | -0.661469133 | 7.0716958  | -12.34845915 | 8.48E-28 | 2.79E-26 | 52.39870924 |
| TUFM     | -0.572512041 | 7.89543224 | -12.34842128 | 8.48E-28 | 2.79E-26 | 52.39841684 |
| UQCC1    | -0.600273413 | 4.16507334 | -12.34772525 | 8.53E-28 | 2.80E-26 | 52.39304304 |
| HMGCL    | -0.578323177 | 5.3224973  | -12.3403373  | 9.03E-28 | 2.96E-26 | 52.33600745 |
| ATP6V0E  | -0.65944321  | 8.55358188 | -12.33752893 | 9.23E-28 | 3.02E-26 | 52.31432881 |
| UROS     | -0.577109493 | 4.4120964  | -12.32581333 | 1.01E-27 | 3.30E-26 | 52.223906   |

|         |              |            |              |          |          |             |
|---------|--------------|------------|--------------|----------|----------|-------------|
| HAX1    | -0.541752538 | 6.70499015 | -12.32506234 | 1.02E-27 | 3.32E-26 | 52.21811045 |
| RGN     | -1.189273313 | 4.59933961 | -12.32314997 | 1.03E-27 | 3.36E-26 | 52.20335278 |
| SMIM27  | -0.609120746 | 3.2766331  | -12.3217675  | 1.04E-27 | 3.39E-26 | 52.19268463 |
| DMAC1   | -0.643535253 | 5.53983577 | -12.31422571 | 1.11E-27 | 3.59E-26 | 52.13449216 |
| ARHGAP  | -1.061085648 | 2.7354855  | -12.30773259 | 1.16E-27 | 3.77E-26 | 52.0843984  |
| GMPPB   | -0.781269325 | 4.01731332 | -12.29993927 | 1.24E-27 | 4.00E-26 | 52.02428249 |
| TMEM88  | -1.519336662 | 4.63997122 | -12.29700753 | 1.27E-27 | 4.08E-26 | 52.00167017 |
| GALT    | -0.703542198 | 4.29497306 | -12.28586817 | 1.38E-27 | 4.44E-26 | 51.91576562 |
| PDAP1   | -0.538957129 | 6.83065213 | -12.28433207 | 1.40E-27 | 4.49E-26 | 51.90392109 |
| DYNLT1  | -0.703967485 | 5.97578226 | -12.28213008 | 1.42E-27 | 4.56E-26 | 51.88694265 |
| PRPS1   | -0.995401229 | 5.6539878  | -12.27905754 | 1.46E-27 | 4.66E-26 | 51.86325307 |
| C8orf48 | -0.870297062 | 2.48460574 | -12.27701231 | 1.48E-27 | 4.72E-26 | 51.84748503 |
| SPATA3  | -0.593714246 | 2.34642561 | -12.27428584 | 1.51E-27 | 4.81E-26 | 51.82646592 |
| PIGP    | -0.599180827 | 3.22414643 | -12.27234858 | 1.53E-27 | 4.87E-26 | 51.81153174 |
| MRPL35  | -0.696002303 | 4.58368358 | -12.27225827 | 1.53E-27 | 4.87E-26 | 51.81083553 |
| ITPR1   | -1.7710268   | 3.54684354 | -12.27077779 | 1.55E-27 | 4.92E-26 | 51.79942309 |
| HMGNS   | -0.978381175 | 4.29086739 | -12.26433316 | 1.63E-27 | 5.16E-26 | 51.74974793 |
| FLRT1   | -1.835114455 | 1.58610673 | -12.24565124 | 1.89E-27 | 5.96E-26 | 51.60578553 |
| ZMYND1  | -0.875662679 | 3.13536963 | -12.24182215 | 1.94E-27 | 6.13E-26 | 51.57628562 |
| MIOX    | -2.052758618 | 2.85762787 | -12.23487782 | 2.05E-27 | 6.46E-26 | 51.52279141 |
| MRPL15  | -0.690902747 | 5.99569243 | -12.23151327 | 2.11E-27 | 6.62E-26 | 51.49687613 |
| TMEM22  | -0.601800001 | 4.70337184 | -12.21183713 | 2.45E-27 | 7.69E-26 | 51.34535849 |
| LIPT2   | -0.760731187 | 2.44280516 | -12.20923877 | 2.50E-27 | 7.84E-26 | 51.32535434 |
| NDUFAF  | -0.79152991  | 5.41086357 | -12.20822227 | 2.52E-27 | 7.88E-26 | 51.31752885 |
| TMCO4   | -0.682206899 | 5.15312678 | -12.2079856  | 2.53E-27 | 7.88E-26 | 51.31570691 |
| COQ4    | -0.840249478 | 5.72232993 | -12.20130678 | 2.66E-27 | 8.29E-26 | 51.26429469 |
| BFSP1   | -1.15922784  | 2.20938971 | -12.19825446 | 2.73E-27 | 8.47E-26 | 51.24080106 |
| SPAG7   | -0.568493309 | 6.35494552 | -12.19047963 | 2.90E-27 | 8.98E-26 | 51.1809651  |
| WDR61   | -0.693893772 | 4.33437721 | -12.18950513 | 2.92E-27 | 9.03E-26 | 51.17346595 |
| FHIT    | -0.651769175 | 2.8147588  | -12.18757615 | 2.96E-27 | 9.15E-26 | 51.15862218 |
| ARL3    | -0.676986218 | 5.22797047 | -12.18693718 | 2.98E-27 | 9.18E-26 | 51.15370536 |
| PLEKHD  | -1.134669066 | 0.88335605 | -12.18355316 | 3.06E-27 | 9.41E-26 | 51.12766664 |
| SNRPG   | -0.686834485 | 5.76217043 | -12.18256347 | 3.08E-27 | 9.47E-26 | 51.12005173 |
| COX5B   | -0.816788148 | 7.82738517 | -12.17624931 | 3.24E-27 | 9.92E-26 | 51.07147291 |
| ELP5    | -0.592189673 | 5.14800672 | -12.17560145 | 3.25E-27 | 9.96E-26 | 51.06648887 |
| GOT2    | -0.694615915 | 6.38783317 | -12.17360509 | 3.30E-27 | 1.01E-25 | 51.05113118 |
| CYCS    | -0.917097628 | 5.67081891 | -12.1731711  | 3.31E-27 | 1.01E-25 | 51.0477927  |
| FUNDC2  | -0.567232436 | 4.3520005  | -12.16804248 | 3.45E-27 | 1.05E-25 | 51.00834244 |
| LSM4    | -0.625367668 | 6.29158436 | -12.16217784 | 3.61E-27 | 1.10E-25 | 50.96323596 |
| ATP5F1E | -0.923779413 | 9.17933753 | -12.16076196 | 3.65E-27 | 1.11E-25 | 50.95234689 |

|          |              |            |              |          |          |             |
|----------|--------------|------------|--------------|----------|----------|-------------|
| DNAJC1   | -0.751008122 | 6.00284714 | -12.15856156 | 3.71E-27 | 1.12E-25 | 50.93542497 |
| TPST1    | -0.938440633 | 3.85488355 | -12.15652488 | 3.77E-27 | 1.14E-25 | 50.9197629  |
| CLCNKB   | -1.707428755 | 2.67376947 | -12.15511238 | 3.81E-27 | 1.15E-25 | 50.90890117 |
| MRPL16   | -0.482649373 | 4.65368335 | -12.14853595 | 4.01E-27 | 1.21E-25 | 50.85833467 |
| ARMC6    | -0.596555117 | 4.85110111 | -12.13721072 | 4.38E-27 | 1.32E-25 | 50.77127138 |
| RSPH1    | -1.058603471 | 2.9932251  | -12.1261865  | 4.77E-27 | 1.43E-25 | 50.68654282 |
| OST4     | -0.639921522 | 9.02879537 | -12.11590264 | 5.17E-27 | 1.55E-25 | 50.6075229  |
| TCEAL3   | -0.717257346 | 5.96009914 | -12.11539923 | 5.19E-27 | 1.55E-25 | 50.60365522 |
| DUSP19   | -0.823905888 | 1.75786618 | -12.11426708 | 5.23E-27 | 1.56E-25 | 50.5949571  |
| C12orf45 | -0.65150217  | 4.42047199 | -12.10298541 | 5.71E-27 | 1.70E-25 | 50.50829381 |
| CFAP99   | -0.483655256 | 0.6170716  | -12.10001798 | 5.84E-27 | 1.74E-25 | 50.48550228 |
| FMC1     | -0.892034408 | 5.00463969 | -12.09720026 | 5.97E-27 | 1.77E-25 | 50.46386192 |
| ADIPOR2  | -0.920901014 | 5.35698055 | -12.09517944 | 6.07E-27 | 1.80E-25 | 50.4483427  |
| CFAP46   | -0.824175106 | 1.3112042  | -12.08069155 | 6.79E-27 | 2.01E-25 | 50.33710105 |
| NIT2     | -0.478303118 | 3.78078142 | -12.08059161 | 6.79E-27 | 2.01E-25 | 50.33633379 |
| C16orf71 | -0.622248941 | 0.89078847 | -12.07890855 | 6.88E-27 | 2.03E-25 | 50.32341314 |
| ATP5K    | -0.719741351 | 3.80304308 | -12.07775566 | 6.95E-27 | 2.05E-25 | 50.31456291 |
| MRPS17   | -0.529900386 | 3.79174667 | -12.07613731 | 7.03E-27 | 2.07E-25 | 50.30213981 |
| MYCBP    | -0.75708409  | 4.51874904 | -12.07192732 | 7.27E-27 | 2.13E-25 | 50.26982445 |
| SYP      | -0.512265951 | 1.00933431 | -12.06939694 | 7.41E-27 | 2.17E-25 | 50.25040309 |
| ARL4D    | -1.109462956 | 6.48869449 | -12.06754595 | 7.52E-27 | 2.20E-25 | 50.23619686 |
| LGMN     | -1.102198281 | 6.64042384 | -12.05074367 | 8.56E-27 | 2.50E-25 | 50.10726778 |
| CDON     | -1.553832331 | 2.99034141 | -12.04210314 | 9.15E-27 | 2.67E-25 | 50.04098526 |
| OTOS     | -2.489681862 | 5.39179479 | -12.03696286 | 9.53E-27 | 2.77E-25 | 50.00155975 |
| ZC2HC1   | -0.77496254  | 3.01398242 | -12.03230041 | 9.88E-27 | 2.87E-25 | 49.96580316 |
| CCDC16   | -0.915332262 | 5.04003271 | -12.02574231 | 1.04E-26 | 3.01E-25 | 49.9155151  |
| MRS2     | -0.665564834 | 4.09187869 | -12.02242617 | 1.07E-26 | 3.09E-25 | 49.89008946 |
| SMIM4    | -0.845963265 | 5.00823143 | -12.01878352 | 1.10E-26 | 3.17E-25 | 49.8621627  |
| PCBD1    | -0.587561082 | 7.17051857 | -12.01503228 | 1.13E-26 | 3.26E-25 | 49.83340582 |
| GNG11    | -1.198322636 | 4.95315794 | -11.99827075 | 1.29E-26 | 3.70E-25 | 49.70494261 |
| CPT2     | -0.741728229 | 4.50553911 | -11.9953811  | 1.31E-26 | 3.78E-25 | 49.68280078 |
| BCAP29   | -0.967130012 | 5.12654787 | -11.99255318 | 1.34E-26 | 3.85E-25 | 49.66113347 |
| COQ6     | -0.456618273 | 2.63973999 | -11.9878656  | 1.39E-26 | 3.99E-25 | 49.62522063 |
| MRPS5    | -0.500262981 | 4.49480852 | -11.9786981  | 1.50E-26 | 4.26E-25 | 49.55499711 |
| DIRAS2   | -1.161405128 | 1.13897996 | -11.97869729 | 1.50E-26 | 4.26E-25 | 49.55499093 |
| CIB4     | -1.873017173 | 1.36027309 | -11.978668   | 1.50E-26 | 4.26E-25 | 49.55476662 |
| MPC2     | -0.634621924 | 5.82741381 | -11.97836042 | 1.50E-26 | 4.27E-25 | 49.55241083 |
| THAP11   | -0.679633162 | 5.16704427 | -11.96697244 | 1.64E-26 | 4.65E-25 | 49.46519974 |
| TTC30B   | -0.84307496  | 3.07656476 | -11.96622154 | 1.65E-26 | 4.67E-25 | 49.45945011 |
| RNF167   | -0.590266385 | 7.09565381 | -11.96123282 | 1.71E-26 | 4.85E-25 | 49.42125355 |

|          |              |            |              |          |          |             |
|----------|--------------|------------|--------------|----------|----------|-------------|
| SPRYD4   | -0.522815919 | 3.06028183 | -11.95892643 | 1.74E-26 | 4.92E-25 | 49.40359607 |
| C6orf136 | -0.57106903  | 4.63573062 | -11.95177103 | 1.84E-26 | 5.20E-25 | 49.34882089 |
| CCDC58   | -0.55586364  | 4.15732858 | -11.95098431 | 1.85E-26 | 5.22E-25 | 49.34279905 |
| CYB561I  | -0.675730267 | 4.79685608 | -11.94864095 | 1.89E-26 | 5.30E-25 | 49.32486275 |
| NDUFAF   | -0.677429226 | 4.06225958 | -11.93311084 | 2.13E-26 | 5.97E-25 | 49.20601894 |
| RAB13    | -0.560761409 | 7.01443679 | -11.92696438 | 2.23E-26 | 6.25E-25 | 49.1589952  |
| COMMD1   | -0.726320338 | 6.38420405 | -11.92395444 | 2.28E-26 | 6.39E-25 | 49.13597009 |
| SLC25A1  | -0.578032005 | 6.46570104 | -11.9223025  | 2.31E-26 | 6.46E-25 | 49.12333394 |
| NRL      | -0.656841036 | 2.20916075 | -11.92141025 | 2.33E-26 | 6.49E-25 | 49.11650904 |
| IQCG     | -0.693927612 | 2.09803641 | -11.91820546 | 2.39E-26 | 6.64E-25 | 49.09199665 |
| POLDIP2  | -0.530962531 | 7.1338945  | -11.91740968 | 2.40E-26 | 6.67E-25 | 49.08591026 |
| TPO      | -3.999579536 | 6.98325197 | -11.90794842 | 2.58E-26 | 7.17E-25 | 49.01355627 |
| SNRPC    | -0.582362629 | 7.17593981 | -11.90642903 | 2.61E-26 | 7.24E-25 | 49.00193845 |
| IMPA2    | -1.235406174 | 3.84595041 | -11.90271663 | 2.69E-26 | 7.44E-25 | 48.97355374 |
| TMED3    | -0.673463838 | 4.74042582 | -11.90064953 | 2.73E-26 | 7.55E-25 | 48.95774993 |
| SHISA4   | -0.930160813 | 5.75931786 | -11.89816863 | 2.78E-26 | 7.68E-25 | 48.93878347 |
| RBP7     | -1.217279328 | 5.39465831 | -11.89413667 | 2.87E-26 | 7.91E-25 | 48.90796165 |
| HPF1     | -0.586127886 | 5.12066954 | -11.88672835 | 3.04E-26 | 8.36E-25 | 48.85133731 |
| PPP1R4   | -0.603514637 | 0.67504926 | -11.88390346 | 3.11E-26 | 8.53E-25 | 48.82974841 |
| TMEM23   | -0.680280319 | 6.99574092 | -11.88282083 | 3.13E-26 | 8.59E-25 | 48.8214749  |
| RIC8B    | -0.853607416 | 3.22706284 | -11.88110801 | 3.18E-26 | 8.69E-25 | 48.80838588 |
| NTPCR    | -0.633162784 | 3.32786572 | -11.88009689 | 3.20E-26 | 8.74E-25 | 48.80065938 |
| C15orf65 | -0.749310262 | 2.76025466 | -11.87562088 | 3.31E-26 | 9.04E-25 | 48.76645797 |
| ARMC7    | -0.683586228 | 4.15490694 | -11.8733495  | 3.37E-26 | 9.18E-25 | 48.74910371 |
| PIGBOS   | -0.689879881 | 5.11661231 | -11.86931115 | 3.48E-26 | 9.46E-25 | 48.71825134 |
| P4HB     | -0.721424857 | 8.53312769 | -11.86663169 | 3.55E-26 | 9.64E-25 | 48.69778238 |
| HIST1H4  | -1.765634535 | 3.14171055 | -11.85558188 | 3.87E-26 | 1.05E-24 | 48.61338444 |
| DEPTOR   | -1.618453274 | 5.71105171 | -11.85536161 | 3.87E-26 | 1.05E-24 | 48.61170225 |
| DYNLL2   | -0.698826141 | 6.70029163 | -11.85183375 | 3.98E-26 | 1.08E-24 | 48.58476149 |
| MRPL1    | -0.529257173 | 4.78116224 | -11.84373606 | 4.24E-26 | 1.14E-24 | 48.52293168 |
| CDK2AP   | -0.912846147 | 7.12244398 | -11.83913447 | 4.39E-26 | 1.18E-24 | 48.48780167 |
| C12orf73 | -0.6507086   | 3.29038983 | -11.83420241 | 4.56E-26 | 1.23E-24 | 48.45015317 |
| PEX11G   | -0.800221912 | 3.84766056 | -11.8210458  | 5.05E-26 | 1.35E-24 | 48.34974528 |
| PPA2     | -0.550974601 | 5.33267697 | -11.81728178 | 5.20E-26 | 1.39E-24 | 48.32102522 |
| PSMD9    | -0.541916805 | 3.21108445 | -11.81580865 | 5.25E-26 | 1.41E-24 | 48.30978572 |
| TMEM20   | -0.77683703  | 7.66260199 | -11.81022072 | 5.49E-26 | 1.47E-24 | 48.26715536 |
| BAD      | -0.755656159 | 6.44602879 | -11.8082229  | 5.57E-26 | 1.49E-24 | 48.25191545 |
| UXT      | -0.56900395  | 6.990733   | -11.79594646 | 6.12E-26 | 1.63E-24 | 48.15828354 |
| SEC61G   | -0.734033094 | 6.18262034 | -11.79463363 | 6.19E-26 | 1.64E-24 | 48.14827235 |
| SAP18    | -0.531109663 | 6.81896534 | -11.79259785 | 6.28E-26 | 1.67E-24 | 48.1327488  |

|          |              |            |              |          |          |             |
|----------|--------------|------------|--------------|----------|----------|-------------|
| MCTS1    | -0.540386934 | 4.8626457  | -11.78926973 | 6.45E-26 | 1.71E-24 | 48.10737236 |
| PRPSAP   | -0.659409844 | 4.35282253 | -11.78514884 | 6.65E-26 | 1.76E-24 | 48.07595404 |
| ZNHIT3   | -0.564075503 | 3.72610016 | -11.78203494 | 6.82E-26 | 1.80E-24 | 48.05221538 |
| GSTM3    | -1.50222971  | 4.6410833  | -11.77689312 | 7.09E-26 | 1.87E-24 | 48.01302089 |
| CBR1     | -1.001719282 | 5.91368443 | -11.77325842 | 7.29E-26 | 1.92E-24 | 47.98531776 |
| STXBP5l  | -1.377064584 | 1.11510041 | -11.77307562 | 7.30E-26 | 1.92E-24 | 47.98392453 |
| GRHPR    | -0.596451155 | 5.01699418 | -11.77157469 | 7.39E-26 | 1.94E-24 | 47.97248551 |
| NOP10    | -0.580871977 | 8.00571723 | -11.74486697 | 9.07E-26 | 2.38E-24 | 47.769009   |
| PPIA     | -0.507245498 | 7.38612701 | -11.74321866 | 9.19E-26 | 2.40E-24 | 47.75645554 |
| GRIN2C   | -2.102744326 | 2.26406488 | -11.7417753  | 9.29E-26 | 2.43E-24 | 47.74546349 |
| PRELID1  | -0.514730965 | 5.76748526 | -11.74130345 | 9.32E-26 | 2.43E-24 | 47.7418701  |
| KCTD8    | -1.422805147 | 1.74649579 | -11.73794253 | 9.57E-26 | 2.49E-24 | 47.71627642 |
| ALDOA    | -0.621514873 | 8.76739153 | -11.73791934 | 9.57E-26 | 2.49E-24 | 47.71609982 |
| ESD      | -0.627236047 | 6.42502148 | -11.73259556 | 9.97E-26 | 2.59E-24 | 47.67556332 |
| IMMT     | -0.727032061 | 5.76112854 | -11.72962686 | 1.02E-25 | 2.64E-24 | 47.65296126 |
| LCA5L    | -0.635029316 | 1.66915712 | -11.71891881 | 1.11E-25 | 2.87E-24 | 47.57145028 |
| AK2      | -0.630352735 | 5.97707948 | -11.71524598 | 1.14E-25 | 2.94E-24 | 47.54349729 |
| DYNLRB   | -0.856089883 | 1.51472787 | -11.71286369 | 1.16E-25 | 2.99E-24 | 47.52536774 |
| RRP36    | -0.575924186 | 5.32728997 | -11.70741655 | 1.21E-25 | 3.12E-24 | 47.48391834 |
| TIMM13   | -0.717836836 | 6.28254777 | -11.70705151 | 1.21E-25 | 3.12E-24 | 47.48114077 |
| NDUFAF   | -0.584849573 | 5.21894232 | -11.69933046 | 1.29E-25 | 3.31E-24 | 47.42239873 |
| SMUG1    | -0.543097721 | 3.99609086 | -11.69880312 | 1.29E-25 | 3.32E-24 | 47.4183871  |
| UNG      | -0.714957312 | 5.57597489 | -11.69239863 | 1.36E-25 | 3.48E-24 | 47.36967091 |
| LLPH     | -0.529484114 | 3.06276956 | -11.69174688 | 1.36E-25 | 3.49E-24 | 47.36471384 |
| ZNF346   | -0.633985279 | 3.53198336 | -11.68867728 | 1.40E-25 | 3.57E-24 | 47.34136788 |
| PDIA4    | -1.19918058  | 8.4470224  | -11.68555889 | 1.43E-25 | 3.65E-24 | 47.31765286 |
| C18orf32 | -0.580166764 | 2.56435777 | -11.68481151 | 1.44E-25 | 3.66E-24 | 47.31196935 |
| HDDC2    | -0.629016198 | 5.07246816 | -11.68292446 | 1.46E-25 | 3.71E-24 | 47.29761973 |
| IL11RA   | -1.064906722 | 4.3689369  | -11.66711364 | 1.65E-25 | 4.18E-24 | 47.17741731 |
| ERH      | -0.550179083 | 7.57203294 | -11.66685147 | 1.65E-25 | 4.19E-24 | 47.17542456 |
| MMAB     | -0.646563249 | 4.30761048 | -11.66302613 | 1.70E-25 | 4.31E-24 | 47.14634977 |
| NECAB3   | -0.886668467 | 4.45338482 | -11.65895241 | 1.75E-25 | 4.44E-24 | 47.1153904  |
| GATB     | -0.448068886 | 2.38895806 | -11.65703107 | 1.78E-25 | 4.49E-24 | 47.10078979 |
| MYL6     | -0.648344501 | 9.00249658 | -11.65652951 | 1.79E-25 | 4.51E-24 | 47.09697839 |
| NIPSNAF  | -0.812907518 | 5.473136   | -11.65537377 | 1.80E-25 | 4.54E-24 | 47.08819621 |
| NFYC     | -0.605217428 | 4.90044267 | -11.64445964 | 1.96E-25 | 4.93E-24 | 47.005275   |
| HSD11B1  | -1.671638846 | 2.95251542 | -11.64133752 | 2.01E-25 | 5.04E-24 | 46.98155873 |
| CUEDC2   | -0.602544348 | 6.91788671 | -11.63898355 | 2.05E-25 | 5.12E-24 | 46.96367878 |
| NAGLU    | -0.769721824 | 6.01438059 | -11.63568207 | 2.10E-25 | 5.25E-24 | 46.93860365 |
| COPS6    | -0.520606335 | 6.81879826 | -11.63139767 | 2.17E-25 | 5.41E-24 | 46.90606639 |

|          |              |            |              |          |          |             |
|----------|--------------|------------|--------------|----------|----------|-------------|
| RPS19BI  | -0.805625767 | 5.72517493 | -11.62983631 | 2.19E-25 | 5.46E-24 | 46.89420976 |
| ATPAF2   | -0.483867792 | 3.56920627 | -11.62980439 | 2.19E-25 | 5.46E-24 | 46.89396741 |
| PPIC     | -0.762117937 | 6.56738767 | -11.62972896 | 2.20E-25 | 5.46E-24 | 46.89339462 |
| MDH1     | -0.629517988 | 6.3626329  | -11.61691381 | 2.42E-25 | 6.02E-24 | 46.79609785 |
| CDK5     | -0.540770597 | 4.02736494 | -11.61232335 | 2.51E-25 | 6.22E-24 | 46.76125362 |
| LRRFIP2  | -0.57613849  | 3.65462978 | -11.61143372 | 2.53E-25 | 6.25E-24 | 46.75450128 |
| FZD8     | -1.112445452 | 3.33797025 | -11.59820908 | 2.80E-25 | 6.91E-24 | 46.65414446 |
| SCO1     | -0.69137141  | 3.23303969 | -11.59367152 | 2.89E-25 | 7.15E-24 | 46.61971873 |
| BTNL9    | -1.543522547 | 2.84111202 | -11.58961515 | 2.99E-25 | 7.36E-24 | 46.58894721 |
| SEPHS1   | -0.681209418 | 5.79167579 | -11.58735379 | 3.04E-25 | 7.48E-24 | 46.57179402 |
| C15orf40 | -0.471456002 | 2.34034771 | -11.58295368 | 3.14E-25 | 7.72E-24 | 46.53842066 |
| DIO1     | -3.753301549 | 4.97111922 | -11.58071255 | 3.20E-25 | 7.85E-24 | 46.52142391 |
| BEX5     | -1.138829862 | 5.35271582 | -11.57683214 | 3.29E-25 | 8.07E-24 | 46.4919973  |
| RNF7     | -0.545946048 | 5.84078339 | -11.57619315 | 3.31E-25 | 8.10E-24 | 46.4871519  |
| SIRT5    | -0.564899094 | 3.55253846 | -11.57266762 | 3.40E-25 | 8.31E-24 | 46.46041956 |
| ALG1     | -0.712642971 | 3.87024908 | -11.56990055 | 3.47E-25 | 8.47E-24 | 46.43944005 |
| RAMP3    | -1.17422508  | 6.45518819 | -11.56894175 | 3.50E-25 | 8.52E-24 | 46.43217091 |
| MCEE     | -0.590213108 | 3.80952193 | -11.56398569 | 3.63E-25 | 8.84E-24 | 46.39459963 |
| MLF2     | -0.500369255 | 7.48784304 | -11.56301545 | 3.66E-25 | 8.89E-24 | 46.38724491 |
| SUMO1    | -0.633490318 | 7.18061061 | -11.56214719 | 3.68E-25 | 8.94E-24 | 46.38066345 |
| ANKRD4   | -0.833242727 | 3.47076806 | -11.56166611 | 3.70E-25 | 8.96E-24 | 46.37701685 |
| NUDT22   | -0.624631384 | 4.57677696 | -11.55779654 | 3.81E-25 | 9.21E-24 | 46.34768736 |
| PDE6D    | -0.548311886 | 3.97265823 | -11.55768783 | 3.81E-25 | 9.21E-24 | 46.34686345 |
| KCNAB1   | -2.353768012 | 3.63573583 | -11.55687369 | 3.84E-25 | 9.26E-24 | 46.34069304 |
| LSM1     | -0.648144356 | 5.02864457 | -11.55515812 | 3.89E-25 | 9.36E-24 | 46.3276912  |
| ADIG     | -1.481973972 | 1.23598405 | -11.55407771 | 3.92E-25 | 9.43E-24 | 46.31950331 |
| TMEM80   | -0.863146848 | 4.58039485 | -11.5527305  | 3.96E-25 | 9.51E-24 | 46.30929385 |
| METTL1   | -0.679853318 | 4.24473171 | -11.55225404 | 3.97E-25 | 9.53E-24 | 46.30568324 |
| NSMCE3   | -0.718812994 | 5.55142844 | -11.55120897 | 4.01E-25 | 9.60E-24 | 46.29776377 |
| PSMB6    | -0.592724872 | 7.63704705 | -11.5495376  | 4.06E-25 | 9.71E-24 | 46.28509884 |
| BLMH     | -0.57175762  | 4.32494282 | -11.54377563 | 4.24E-25 | 1.01E-23 | 46.2414412  |
| MRPS31   | -0.556272696 | 4.8571809  | -11.5436961  | 4.24E-25 | 1.01E-23 | 46.2408387  |
| PDE7B    | -1.423537778 | 2.74280705 | -11.54142409 | 4.32E-25 | 1.03E-23 | 46.22362589 |
| ID4      | -1.269158256 | 8.23627354 | -11.53888079 | 4.40E-25 | 1.05E-23 | 46.20435906 |
| C7orf50  | -0.696664962 | 6.14835861 | -11.53767781 | 4.44E-25 | 1.06E-23 | 46.19524632 |
| PSPH     | -0.928861761 | 3.86144944 | -11.53667932 | 4.48E-25 | 1.06E-23 | 46.18768286 |
| ZNF781   | -0.803192228 | 1.35566312 | -11.53345442 | 4.59E-25 | 1.09E-23 | 46.16325588 |
| MATN2    | -1.744107327 | 5.64803628 | -11.52823555 | 4.78E-25 | 1.13E-23 | 46.12373017 |
| THEM6    | -0.669783657 | 5.11579251 | -11.52761431 | 4.80E-25 | 1.13E-23 | 46.11902554 |
| SLC27A4  | -1.344082836 | 5.1076206  | -11.52537257 | 4.88E-25 | 1.15E-23 | 46.10204943 |

|          |              |            |              |          |          |             |
|----------|--------------|------------|--------------|----------|----------|-------------|
| RAD51C   | -0.463368924 | 2.56390347 | -11.52420542 | 4.93E-25 | 1.16E-23 | 46.09321137 |
| MAPRE3   | -0.801745666 | 4.273443   | -11.52113148 | 5.04E-25 | 1.19E-23 | 46.0699357  |
| COA5     | -0.61216182  | 5.37350567 | -11.51622826 | 5.24E-25 | 1.23E-23 | 46.03281288 |
| FAM200E  | -0.591804989 | 4.2428069  | -11.51585392 | 5.25E-25 | 1.23E-23 | 46.02997888 |
| TRUB2    | -0.529291921 | 4.31626421 | -11.51576688 | 5.25E-25 | 1.23E-23 | 46.02931998 |
| DYNC2LI  | -0.654018402 | 4.22183501 | -11.51526448 | 5.27E-25 | 1.23E-23 | 46.02551659 |
| ELOC     | -0.491923941 | 4.44967273 | -11.51341994 | 5.35E-25 | 1.25E-23 | 46.01155296 |
| ZCRB1    | -0.60414153  | 5.88106954 | -11.51331529 | 5.35E-25 | 1.25E-23 | 46.01076077 |
| ERO1B    | -1.28138027  | 3.87790547 | -11.51317994 | 5.36E-25 | 1.25E-23 | 46.0097362  |
| SNX3     | -0.66383095  | 7.68542511 | -11.51274153 | 5.38E-25 | 1.25E-23 | 46.00641742 |
| TCEAL9   | -0.780321099 | 7.21443572 | -11.51016232 | 5.48E-25 | 1.27E-23 | 45.98689379 |
| SYNM     | -1.090697259 | 2.5751686  | -11.50612504 | 5.66E-25 | 1.31E-23 | 45.95633584 |
| GLT8D1   | -0.676378557 | 5.93294259 | -11.50455439 | 5.72E-25 | 1.33E-23 | 45.94444862 |
| ANKRD9   | -0.934585166 | 2.68115229 | -11.50415809 | 5.74E-25 | 1.33E-23 | 45.94144938 |
| NAP1L5   | -0.9147144   | 4.28273597 | -11.50344404 | 5.77E-25 | 1.33E-23 | 45.93604545 |
| ATRAID   | -0.649970208 | 7.80257626 | -11.50098814 | 5.88E-25 | 1.36E-23 | 45.91745989 |
| NFKBIB   | -0.557236667 | 5.05127022 | -11.4974893  | 6.04E-25 | 1.39E-23 | 45.89098383 |
| DEFB131  | -1.374358191 | 2.07264287 | -11.49176086 | 6.31E-25 | 1.45E-23 | 45.84764161 |
| MPLKIP   | -0.538606365 | 3.39198748 | -11.48964968 | 6.41E-25 | 1.47E-23 | 45.83166985 |
| MROH8    | -0.647219503 | 1.90889401 | -11.48884117 | 6.45E-25 | 1.48E-23 | 45.82555345 |
| ALDH4A1  | -1.252240052 | 3.20740975 | -11.47556732 | 7.14E-25 | 1.64E-23 | 45.72515594 |
| TAF11    | -0.584472669 | 5.56790992 | -11.46948865 | 7.48E-25 | 1.71E-23 | 45.67919187 |
| SDHAF2   | -0.604287309 | 4.39654268 | -11.46633562 | 7.66E-25 | 1.75E-23 | 45.65535314 |
| ECE2     | -0.734709564 | 1.88344263 | -11.46599718 | 7.68E-25 | 1.75E-23 | 45.65279451 |
| C11orf71 | -0.71144862  | 4.48027295 | -11.45689128 | 8.24E-25 | 1.88E-23 | 45.583961   |
| ZNF32    | -0.606732804 | 6.2951514  | -11.45233477 | 8.53E-25 | 1.94E-23 | 45.54952388 |
| CEP70    | -0.734866909 | 4.41888055 | -11.44371237 | 9.11E-25 | 2.07E-23 | 45.48436964 |
| NDUFB7   | -0.774337558 | 8.80064577 | -11.4374053  | 9.56E-25 | 2.17E-23 | 45.43672081 |
| ETFBKM   | -0.551525347 | 1.68451819 | -11.4362385  | 9.64E-25 | 2.19E-23 | 45.42790678 |
| CYP17A1  | -1.12052636  | 1.45456069 | -11.43605231 | 9.66E-25 | 2.19E-23 | 45.42650033 |
| GPB1     | -1.295040274 | 3.78474816 | -11.43498687 | 9.74E-25 | 2.20E-23 | 45.41845227 |
| SNUPN    | -0.545282881 | 4.04841261 | -11.43260549 | 9.91E-25 | 2.24E-23 | 45.40046473 |
| GPR137   | -0.603844195 | 4.74505865 | -11.42425414 | 1.06E-24 | 2.38E-23 | 45.33739315 |
| STK25    | -0.745618139 | 5.2782865  | -11.42419108 | 1.06E-24 | 2.38E-23 | 45.33691703 |
| GPAM     | -1.404154901 | 3.19744221 | -11.41793489 | 1.11E-24 | 2.49E-23 | 45.28967839 |
| GMDS     | -0.692128595 | 3.70046212 | -11.41701865 | 1.12E-24 | 2.51E-23 | 45.28276085 |
| TMEM11   | -0.753141653 | 2.36536287 | -11.41283286 | 1.15E-24 | 2.59E-23 | 45.25116064 |
| VPS16    | -0.576496342 | 5.13397839 | -11.41011953 | 1.18E-24 | 2.64E-23 | 45.23067869 |
| ATP6V1E  | -0.610951804 | 6.32446858 | -11.3990867  | 1.28E-24 | 2.86E-23 | 45.14741179 |
| TIMM22   | -0.521273203 | 4.51303145 | -11.39800633 | 1.29E-24 | 2.88E-23 | 45.1392594  |

|          |              |            |              |          |          |             |
|----------|--------------|------------|--------------|----------|----------|-------------|
| SELENO   | -0.669719354 | 6.43042235 | -11.39188299 | 1.35E-24 | 3.02E-23 | 45.09305798 |
| HTATIP2  | -0.789617533 | 5.26147515 | -11.38985192 | 1.37E-24 | 3.06E-23 | 45.07773507 |
| SMIM26   | -0.552503813 | 6.3923213  | -11.38699826 | 1.40E-24 | 3.12E-23 | 45.05620788 |
| ATG4A    | -0.639213872 | 4.37902355 | -11.38281427 | 1.45E-24 | 3.22E-23 | 45.02464813 |
| ZC3HC1   | -0.492825283 | 4.03609113 | -11.38278854 | 1.45E-24 | 3.22E-23 | 45.02445401 |
| MLYCD    | -0.556833498 | 2.01208306 | -11.37896368 | 1.49E-24 | 3.31E-23 | 44.99560649 |
| VEGFB    | -0.614023045 | 7.32926443 | -11.37709146 | 1.51E-24 | 3.35E-23 | 44.98148718 |
| TIMM10   | -0.670546718 | 6.36181899 | -11.37509156 | 1.54E-24 | 3.40E-23 | 44.96640575 |
| CYP2S1   | 2.132951421  | 3.19083729 | 11.37362171  | 1.55E-24 | 3.43E-23 | 44.95532206 |
| TFCP2L1  | -1.966903018 | 2.86232125 | -11.36605445 | 1.65E-24 | 3.63E-23 | 44.89826691 |
| DUS2     | -0.496136083 | 2.75877525 | -11.36514551 | 1.66E-24 | 3.65E-23 | 44.89141457 |
| MTRF1L   | -0.524179857 | 2.73522539 | -11.36445031 | 1.67E-24 | 3.67E-23 | 44.88617367 |
| TCEANC   | -0.48134536  | 1.71128115 | -11.36272974 | 1.69E-24 | 3.71E-23 | 44.87320337 |
| PPFIA3   | -0.69696994  | 1.97919163 | -11.36032578 | 1.72E-24 | 3.77E-23 | 44.85508244 |
| NDUFB1   | -0.60305263  | 7.63568037 | -11.35264237 | 1.82E-24 | 4.00E-23 | 44.79717377 |
| SAT2     | -0.788782098 | 6.92319618 | -11.34978161 | 1.86E-24 | 4.08E-23 | 44.77561587 |
| SGTA     | -0.592156367 | 6.32281639 | -11.34291794 | 1.96E-24 | 4.29E-23 | 44.7239005  |
| SNRPE    | -0.637532421 | 5.96609006 | -11.34169963 | 1.98E-24 | 4.33E-23 | 44.714722   |
| LYPLAL1  | -0.576053556 | 4.58454545 | -11.3387136  | 2.03E-24 | 4.42E-23 | 44.6922273  |
| BLVRB    | -0.666883423 | 6.53962187 | -11.32235852 | 2.30E-24 | 5.00E-23 | 44.56905376 |
| EIF3M    | -0.600870766 | 5.65499102 | -11.32098811 | 2.32E-24 | 5.04E-23 | 44.5587356  |
| C10orf14 | -0.568089318 | 2.04531503 | -11.32045197 | 2.33E-24 | 5.06E-23 | 44.55469897 |
| WFS1     | -1.071873135 | 5.61568805 | -11.31936558 | 2.35E-24 | 5.09E-23 | 44.54651961 |
| TMED4    | -0.73586265  | 7.70023797 | -11.3165508  | 2.40E-24 | 5.20E-23 | 44.52532869 |
| GBA2     | -0.662216448 | 5.43928899 | -11.31213868 | 2.48E-24 | 5.37E-23 | 44.49211571 |
| SNTA1    | -1.098042749 | 7.13235932 | -11.31121697 | 2.50E-24 | 5.40E-23 | 44.48517789 |
| BOD1     | -0.705083109 | 6.25025498 | -11.31013634 | 2.52E-24 | 5.44E-23 | 44.47704412 |
| KPTN     | -0.642370598 | 3.04656235 | -11.30847497 | 2.55E-24 | 5.50E-23 | 44.46453976 |
| METRNL   | -1.282000587 | 4.52754299 | -11.30749851 | 2.57E-24 | 5.53E-23 | 44.45719067 |
| HDHD5    | -0.620196485 | 3.63736564 | -11.29857726 | 2.75E-24 | 5.91E-23 | 44.39005656 |
| KMT5A    | -0.728220927 | 4.73114114 | -11.29845965 | 2.75E-24 | 5.91E-23 | 44.38917169 |
| IQCH     | -0.666710437 | 1.41911574 | -11.29522078 | 2.82E-24 | 6.05E-23 | 44.36480299 |
| SOD3     | -1.84150259  | 5.93250373 | -11.28574614 | 3.03E-24 | 6.49E-23 | 44.29353079 |
| RAB1A    | -0.749642328 | 7.34176766 | -11.28111394 | 3.14E-24 | 6.72E-23 | 44.25869265 |
| G6PC3    | -0.629672976 | 6.09673243 | -11.27958131 | 3.18E-24 | 6.79E-23 | 44.247167   |
| SLC18B1  | -0.796754594 | 4.3250982  | -11.27602581 | 3.26E-24 | 6.96E-23 | 44.22043103 |
| EXOC3L   | -0.990126241 | 3.08415695 | -11.27283824 | 3.34E-24 | 7.13E-23 | 44.19646413 |
| ATP6V01  | -0.750009971 | 5.50906849 | -11.27018101 | 3.41E-24 | 7.26E-23 | 44.17648646 |
| MRPL54   | -0.742855536 | 6.9543448  | -11.26670384 | 3.50E-24 | 7.45E-23 | 44.1503467  |
| ERCC8    | -0.50845785  | 2.34726412 | -11.26403421 | 3.58E-24 | 7.59E-23 | 44.13027953 |



|         |              |            |              |          |          |             |
|---------|--------------|------------|--------------|----------|----------|-------------|
| IFT46   | -0.602028199 | 4.71440878 | -11.26077657 | 3.66E-24 | 7.77E-23 | 44.10579449 |
| COQ7    | -0.57145254  | 4.24296419 | -11.25566367 | 3.81E-24 | 8.07E-23 | 44.0673697  |
| HSD17B  | -0.86704574  | 6.23320757 | -11.25425847 | 3.85E-24 | 8.14E-23 | 44.0568103  |
| MDH1B   | -0.873745183 | 2.08729427 | -11.2499803  | 3.98E-24 | 8.40E-23 | 44.02466451 |
| NUDCD2  | -0.552007934 | 3.27769877 | -11.2407229  | 4.27E-24 | 9.00E-23 | 43.95511944 |
| BRK1    | -0.63980424  | 8.71849612 | -11.23984849 | 4.30E-24 | 9.05E-23 | 43.94855153 |
| RABGEF  | -0.611763705 | 2.34181904 | -11.2397493  | 4.30E-24 | 9.05E-23 | 43.94780646 |
| LSM5    | -0.513474561 | 4.21580178 | -11.23411934 | 4.49E-24 | 9.43E-23 | 43.90552265 |
| UQCRC1  | -0.535867567 | 7.37963033 | -11.23118768 | 4.59E-24 | 9.63E-23 | 43.88350728 |
| SH2D6   | -0.976908535 | 0.88737904 | -11.22620074 | 4.76E-24 | 9.99E-23 | 43.84606206 |
| STK16   | -0.635007441 | 4.68643063 | -11.22425914 | 4.83E-24 | 1.01E-22 | 43.83148482 |
| MRPS18  | -0.564901195 | 6.91626383 | -11.2237914  | 4.85E-24 | 1.01E-22 | 43.82797317 |
| C5orf30 | -0.951896098 | 3.13528563 | -11.22378839 | 4.85E-24 | 1.01E-22 | 43.82795062 |
| MOK     | -0.696263722 | 2.05509578 | -11.22189902 | 4.92E-24 | 1.03E-22 | 43.81376647 |
| LRRC28  | -0.481148883 | 2.40645928 | -11.22115954 | 4.95E-24 | 1.03E-22 | 43.8082152  |
| 2-Mar   | -0.640525551 | 6.04557063 | -11.21611922 | 5.14E-24 | 1.07E-22 | 43.7703806  |
| DMAC2   | -0.492485442 | 4.86650742 | -11.21223416 | 5.30E-24 | 1.10E-22 | 43.74122182 |
| NOL7    | -0.506461848 | 6.48451842 | -11.2110449  | 5.34E-24 | 1.11E-22 | 43.73229661 |
| GFOD2   | -0.801150922 | 2.88690333 | -11.20962095 | 5.40E-24 | 1.12E-22 | 43.72161061 |
| ZSCAN1  | -1.056121842 | 1.88188681 | -11.20839027 | 5.45E-24 | 1.13E-22 | 43.71237532 |
| NUDT16  | -0.771502459 | 4.65484197 | -11.20793113 | 5.47E-24 | 1.13E-22 | 43.7089299  |
| NUDT5   | -0.513773105 | 4.90351225 | -11.20569501 | 5.57E-24 | 1.15E-22 | 43.69215071 |
| C8orf76 | -0.571387278 | 2.85304407 | -11.19592456 | 5.99E-24 | 1.24E-22 | 43.61884943 |
| RPN1    | -0.664312001 | 8.22925932 | -11.19449748 | 6.06E-24 | 1.25E-22 | 43.60814477 |
| MBLAC1  | -0.761439502 | 2.53069828 | -11.19381652 | 6.09E-24 | 1.25E-22 | 43.60303702 |
| CDH16   | -2.533112908 | 2.52471972 | -11.19060255 | 6.24E-24 | 1.28E-22 | 43.57893092 |
| CFAP221 | -0.603695736 | 0.86291526 | -11.18604411 | 6.46E-24 | 1.33E-22 | 43.54474487 |
| UST     | -1.242272896 | 5.41093507 | -11.18440904 | 6.54E-24 | 1.34E-22 | 43.53248376 |
| ATAD3C  | -0.844030536 | 4.07649593 | -11.18359229 | 6.58E-24 | 1.35E-22 | 43.5263594  |
| PGF     | -1.844960356 | 4.97475875 | -11.18339006 | 6.59E-24 | 1.35E-22 | 43.52484296 |
| KLHDC9  | -0.703952134 | 4.50477217 | -11.18062686 | 6.73E-24 | 1.38E-22 | 43.50412432 |
| PTGR2   | -0.618699922 | 3.11974705 | -11.17871586 | 6.83E-24 | 1.39E-22 | 43.48979648 |
| RAC3    | -1.010694984 | 3.13082923 | -11.17553817 | 6.99E-24 | 1.43E-22 | 43.46597349 |
| ZMAT4   | -2.158210012 | 1.79834815 | -11.17534206 | 7.00E-24 | 1.43E-22 | 43.46450334 |
| ZNF438  | -0.586935565 | 3.80023593 | -11.17463479 | 7.04E-24 | 1.43E-22 | 43.45920128 |
| PPCDC   | -0.572572975 | 3.37283554 | -11.17021159 | 7.28E-24 | 1.48E-22 | 43.42604554 |
| CETP    | -1.414024391 | 2.69602336 | -11.16805221 | 7.40E-24 | 1.50E-22 | 43.40986069 |
| SRI     | -0.656515908 | 5.64315348 | -11.16653937 | 7.49E-24 | 1.52E-22 | 43.39852239 |
| PYM1    | -0.572748088 | 5.55220985 | -11.16545519 | 7.55E-24 | 1.53E-22 | 43.39039709 |
| SAMD13  | -0.886223678 | 2.86351083 | -11.16091731 | 7.81E-24 | 1.58E-22 | 43.35639124 |

|         |              |            |              |          |          |             |
|---------|--------------|------------|--------------|----------|----------|-------------|
| TRAPPC  | -0.564399356 | 4.27141444 | -11.15248483 | 8.33E-24 | 1.68E-22 | 43.29321277 |
| TRPT1   | -0.57214595  | 5.43471537 | -11.15081221 | 8.43E-24 | 1.70E-22 | 43.28068295 |
| B3GNT3  | 3.10937549   | 3.90181137 | 11.14779063  | 8.63E-24 | 1.74E-22 | 43.25804959 |
| PSMG1   | -0.600084237 | 5.08223824 | -11.1452321  | 8.80E-24 | 1.77E-22 | 43.23888637 |
| IDI1    | -0.749676453 | 4.65763819 | -11.1398082  | 9.17E-24 | 1.84E-22 | 43.19826667 |
| FKBP3   | -0.552974912 | 5.82035428 | -11.1294931  | 9.91E-24 | 1.99E-22 | 43.12103547 |
| GALNT1  | -1.68744259  | 3.17125608 | -11.12890801 | 9.95E-24 | 2.00E-22 | 43.11665552 |
| ATP6V1C | -1.064495046 | 2.2485615  | -11.12112732 | 1.06E-23 | 2.11E-22 | 43.05841734 |
| FIS1    | -0.68827335  | 7.8874013  | -11.11909506 | 1.07E-23 | 2.14E-22 | 43.04320823 |
| MT1G    | -4.136679141 | 7.30760668 | -11.11665085 | 1.09E-23 | 2.18E-22 | 43.02491742 |
| CYB5A   | -0.633010475 | 2.79471574 | -11.11604904 | 1.10E-23 | 2.19E-22 | 43.02041414 |
| PCCB    | -0.835393    | 4.31505058 | -11.11417454 | 1.11E-23 | 2.22E-22 | 43.00638785 |
| PAFAH2  | -0.750619141 | 4.87841499 | -11.11389612 | 1.11E-23 | 2.22E-22 | 43.00430459 |
| MED8    | -0.628021663 | 5.4523983  | -11.11383645 | 1.12E-23 | 2.22E-22 | 43.00385809 |
| PRUNE1  | -0.912565034 | 5.4887262  | -11.11306571 | 1.12E-23 | 2.23E-22 | 42.99809121 |
| LIPG    | -1.681818568 | 5.67894999 | -11.11200094 | 1.13E-23 | 2.24E-22 | 42.99012458 |
| RBPMS2  | -1.041736683 | 4.29859579 | -11.11154898 | 1.13E-23 | 2.25E-22 | 42.98674304 |
| ALDH2   | -0.980815602 | 4.86720407 | -11.11100317 | 1.14E-23 | 2.26E-22 | 42.98265943 |
| PSMB5   | -0.584040611 | 7.12379627 | -11.10743437 | 1.17E-23 | 2.31E-22 | 42.95596019 |
| EEF2KM  | -0.588065832 | 3.26656972 | -11.10616606 | 1.18E-23 | 2.33E-22 | 42.9464723  |
| SLC2A8  | -0.704122769 | 3.71083239 | -11.10323831 | 1.21E-23 | 2.38E-22 | 42.924572   |
| ATP5MC  | -0.498568775 | 7.37472486 | -11.10252898 | 1.21E-23 | 2.39E-22 | 42.9192663  |
| CCDC11  | -0.879298511 | 1.71108163 | -11.10131403 | 1.23E-23 | 2.41E-22 | 42.91017901 |
| FAM3A   | -0.640158865 | 5.37754609 | -11.0965552  | 1.27E-23 | 2.50E-22 | 42.87458818 |
| PRDX1   | -0.863429517 | 9.4824939  | -11.09119285 | 1.32E-23 | 2.60E-22 | 42.83449008 |
| MAPK10  | -0.887926162 | 2.8122836  | -11.0886706  | 1.35E-23 | 2.65E-22 | 42.81563176 |
| ZCCHC1  | -0.495784298 | 5.67249142 | -11.08481591 | 1.39E-23 | 2.72E-22 | 42.78681391 |
| ADH5    | -0.697637059 | 5.90160042 | -11.08460571 | 1.39E-23 | 2.72E-22 | 42.78524251 |
| UQCRHL  | -0.489291326 | 1.53941549 | -11.08275946 | 1.41E-23 | 2.76E-22 | 42.77144119 |
| TRMO    | -0.637631828 | 3.56150186 | -11.08234957 | 1.41E-23 | 2.76E-22 | 42.76837725 |
| PIK3R3  | -0.989439214 | 4.05480179 | -11.0774423  | 1.47E-23 | 2.86E-22 | 42.73169814 |
| IFT43   | -0.669059779 | 4.36961774 | -11.07732125 | 1.47E-23 | 2.86E-22 | 42.73079344 |
| FOXRED  | -0.488008082 | 3.37410975 | -11.0725336  | 1.52E-23 | 2.96E-22 | 42.69501406 |
| RBKS    | -0.663316528 | 3.39714686 | -11.07192585 | 1.53E-23 | 2.97E-22 | 42.69047256 |
| RWDD2E  | -0.608677827 | 4.21059275 | -11.06934032 | 1.56E-23 | 3.03E-22 | 42.67115278 |
| DDOST   | -0.70401948  | 8.04318858 | -11.0686156  | 1.57E-23 | 3.04E-22 | 42.66573781 |
| GMPPA   | -0.637386616 | 4.4862046  | -11.05282768 | 1.77E-23 | 3.42E-22 | 42.5478033  |
| COPS5   | -0.479142666 | 4.23886729 | -11.047752   | 1.84E-23 | 3.55E-22 | 42.50990089 |
| SPEF1   | -0.955917459 | 2.09256732 | -11.04737788 | 1.84E-23 | 3.56E-22 | 42.50710741 |
| NDUFB9  | -0.558561445 | 7.2535846  | -11.04246915 | 1.91E-23 | 3.69E-22 | 42.47045797 |

|         |              |            |              |          |          |             |
|---------|--------------|------------|--------------|----------|----------|-------------|
| TMEM25  | -0.673217689 | 5.03147973 | -11.04214771 | 1.92E-23 | 3.69E-22 | 42.46805822 |
| JAZF1   | -0.91245238  | 4.43747585 | -11.04099881 | 1.93E-23 | 3.72E-22 | 42.45948126 |
| GPS1    | -0.525741104 | 5.64710151 | -11.03896011 | 1.96E-23 | 3.78E-22 | 42.44426231 |
| RABL3   | -0.756095565 | 4.22889117 | -11.03433124 | 2.03E-23 | 3.90E-22 | 42.40971145 |
| RTF2    | -0.535816373 | 6.12871866 | -11.03252898 | 2.06E-23 | 3.95E-22 | 42.39626036 |
| ELMO1   | -1.636922562 | 3.72919091 | -11.0279389  | 2.13E-23 | 4.09E-22 | 42.36200605 |
| AHNAK2  | 1.917563419  | 2.85456287 | 11.0235309   | 2.21E-23 | 4.22E-22 | 42.3291152  |
| CCDC15  | -0.660736971 | 1.84702658 | -11.02153591 | 2.24E-23 | 4.28E-22 | 42.31423089 |
| MAIP1   | -0.611930346 | 4.54304612 | -11.01550853 | 2.34E-23 | 4.47E-22 | 42.26926731 |
| CLCNKA  | -1.900454779 | 1.87761291 | -11.01528338 | 2.35E-23 | 4.48E-22 | 42.2675879  |
| BCL2    | -1.271559747 | 4.5986378  | -11.01280083 | 2.39E-23 | 4.56E-22 | 42.249071   |
| HDAC11  | -0.604414898 | 4.52662356 | -11.01135309 | 2.42E-23 | 4.60E-22 | 42.23827325 |
| GEMIN6  | -0.483203144 | 3.09522614 | -11.01096155 | 2.42E-23 | 4.61E-22 | 42.23535303 |
| ZNF580  | -0.797622323 | 5.20575667 | -11.00777194 | 2.48E-23 | 4.72E-22 | 42.21156593 |
| MINDY1  | -0.91548801  | 5.38660101 | -11.00767061 | 2.49E-23 | 4.72E-22 | 42.21081026 |
| MPV17L  | -0.588152028 | 4.42181941 | -11.0068221  | 2.50E-23 | 4.74E-22 | 42.20448276 |
| CASC1   | -0.830851898 | 2.33258017 | -11.00423791 | 2.55E-23 | 4.83E-22 | 42.18521298 |
| MRPL11  | -0.555918529 | 5.0500055  | -11.00269566 | 2.58E-23 | 4.88E-22 | 42.17371355 |
| DYRK4   | -0.528230961 | 3.58673614 | -11.00220237 | 2.59E-23 | 4.89E-22 | 42.17003558 |
| ZMAT5   | -0.632175076 | 4.00129128 | -10.99974045 | 2.64E-23 | 4.98E-22 | 42.15168028 |
| ATG4D   | -0.587986924 | 4.42807713 | -10.99723864 | 2.69E-23 | 5.07E-22 | 42.13302905 |
| AKR7A2  | -0.643982084 | 6.09080143 | -10.9954815  | 2.72E-23 | 5.13E-22 | 42.11993034 |
| MRPL27  | -0.6364807   | 5.37404921 | -10.99194641 | 2.80E-23 | 5.26E-22 | 42.09357993 |
| TSPAN7  | -1.479414845 | 4.52817106 | -10.99003305 | 2.84E-23 | 5.33E-22 | 42.07931911 |
| YKT6    | -0.565986847 | 6.06784573 | -10.98335528 | 2.98E-23 | 5.60E-22 | 42.02955475 |
| CCDC87  | -0.622957584 | 1.17510093 | -10.98018435 | 3.06E-23 | 5.73E-22 | 42.00592796 |
| FAM50B  | -0.811366417 | 3.70142145 | -10.97957012 | 3.07E-23 | 5.75E-22 | 42.00135155 |
| ANKRD5  | -0.651930707 | 4.38374207 | -10.97644621 | 3.14E-23 | 5.88E-22 | 41.97807798 |
| SUOX    | -0.631106056 | 4.41538687 | -10.97290475 | 3.23E-23 | 6.03E-22 | 41.95169638 |
| RCAN2   | -1.357814805 | 4.05269591 | -10.97123617 | 3.27E-23 | 6.10E-22 | 41.93926762 |
| LYRM7   | -0.758515369 | 3.41779056 | -10.96659442 | 3.39E-23 | 6.31E-22 | 41.90469613 |
| DGAT2   | -1.690539251 | 3.48324945 | -10.96654912 | 3.39E-23 | 6.31E-22 | 41.90435876 |
| CBX8    | -0.674618929 | 2.79515692 | -10.96516465 | 3.42E-23 | 6.37E-22 | 41.89404828 |
| PCCA    | -0.719002344 | 3.82201464 | -10.96421424 | 3.45E-23 | 6.40E-22 | 41.88697063 |
| SRP9    | -0.713071893 | 7.59610177 | -10.95817068 | 3.61E-23 | 6.69E-22 | 41.84196983 |
| AUH     | -0.73622713  | 5.04526698 | -10.95759432 | 3.62E-23 | 6.72E-22 | 41.83767874 |
| SWSAP1  | -0.577048276 | 3.17876447 | -10.95564653 | 3.68E-23 | 6.81E-22 | 41.82317746 |
| SLC2A4F | -0.683342205 | 6.26108613 | -10.95532198 | 3.69E-23 | 6.82E-22 | 41.82076133 |
| NSMCE4  | -0.52218989  | 4.4814137  | -10.9517257  | 3.79E-23 | 7.00E-22 | 41.79398984 |
| CHCHD6  | -0.661581957 | 3.9531176  | -10.95145689 | 3.79E-23 | 7.00E-22 | 41.79198886 |

|          |              |            |              |          |          |             |
|----------|--------------|------------|--------------|----------|----------|-------------|
| TTC30A   | -0.889011896 | 2.64863707 | -10.94894576 | 3.87E-23 | 7.13E-22 | 41.77329754 |
| C17orf97 | -0.806045929 | 3.68036475 | -10.94597674 | 3.95E-23 | 7.28E-22 | 41.75119995 |
| NDUFV1   | -0.588996703 | 6.504199   | -10.94536323 | 3.97E-23 | 7.31E-22 | 41.74663397 |
| GRIK4    | -1.28867269  | 1.21050387 | -10.94342031 | 4.03E-23 | 7.41E-22 | 41.73217487 |
| RILPL1   | -0.873228936 | 3.57525527 | -10.94244776 | 4.06E-23 | 7.45E-22 | 41.72493751 |
| EBNA1B   | -0.614750997 | 5.51809106 | -10.93954618 | 4.15E-23 | 7.61E-22 | 41.7033464  |
| IVD      | -0.821473314 | 6.44285622 | -10.93933004 | 4.16E-23 | 7.61E-22 | 41.70173815 |
| TMEM14   | -0.754955944 | 5.63876112 | -10.93072186 | 4.43E-23 | 8.11E-22 | 41.63769593 |
| ASL      | -0.73241525  | 4.84227516 | -10.9273173  | 4.55E-23 | 8.31E-22 | 41.61237206 |
| C22orf39 | -0.656045317 | 3.89226505 | -10.92394754 | 4.67E-23 | 8.52E-22 | 41.58730984 |
| TMEM38   | -1.067385032 | 2.40392429 | -10.91940911 | 4.83E-23 | 8.80E-22 | 41.55356014 |
| PSMC5    | -0.545315297 | 6.68302782 | -10.91612802 | 4.95E-23 | 9.01E-22 | 41.52916375 |
| FGFBP3   | -0.705979735 | 2.39839054 | -10.91611897 | 4.95E-23 | 9.01E-22 | 41.52909647 |
| UBXN8    | -0.748817576 | 3.96420671 | -10.9152114  | 4.98E-23 | 9.06E-22 | 41.52234869 |
| MVD      | -0.697143539 | 4.25160009 | -10.91182473 | 5.11E-23 | 9.28E-22 | 41.49717079 |
| IMP4     | -0.430913849 | 5.16137629 | -10.90908233 | 5.22E-23 | 9.46E-22 | 41.47678476 |
| HIGD1A   | -0.65515597  | 6.63256976 | -10.90628822 | 5.33E-23 | 9.65E-22 | 41.45601621 |
| TCEAL4   | -0.584954948 | 7.29650307 | -10.90432687 | 5.41E-23 | 9.79E-22 | 41.44143871 |
| DTD2     | -0.69621916  | 3.49074076 | -10.90329263 | 5.45E-23 | 9.85E-22 | 41.43375223 |
| CCDC10   | -0.632192173 | 3.35944663 | -10.90191998 | 5.51E-23 | 9.94E-22 | 41.42355106 |
| PSMA4    | -0.509383259 | 5.20550708 | -10.89619113 | 5.75E-23 | 1.04E-21 | 41.38098083 |
| BCAP31   | -0.622970447 | 8.19954309 | -10.89455972 | 5.82E-23 | 1.05E-21 | 41.36885955 |
| NPRL2    | -0.543123085 | 4.22481532 | -10.89330882 | 5.87E-23 | 1.06E-21 | 41.3595659  |
| NQO1     | -1.708603624 | 6.3416244  | -10.88997942 | 6.02E-23 | 1.08E-21 | 41.33483179 |
| UBL7     | -0.558960234 | 6.2761565  | -10.88455275 | 6.27E-23 | 1.13E-21 | 41.2945229  |
| SLC15A2  | -1.242883306 | 2.85850324 | -10.88019309 | 6.48E-23 | 1.16E-21 | 41.262145   |
| STAC     | 1.411965617  | 1.73036716 | 10.87603576  | 6.69E-23 | 1.20E-21 | 41.23127407 |
| C8orf33  | -0.723650755 | 5.50301502 | -10.87109803 | 6.94E-23 | 1.24E-21 | 41.19461379 |
| AMZ2     | -0.49092062  | 5.42449247 | -10.86888592 | 7.05E-23 | 1.26E-21 | 41.17819193 |
| AFG1L    | -0.412798787 | 1.50791797 | -10.86211058 | 7.42E-23 | 1.33E-21 | 41.12790195 |
| RBFA     | -0.472115845 | 3.61591947 | -10.85618793 | 7.76E-23 | 1.38E-21 | 41.0839504  |
| TRAPPC   | -0.518264433 | 3.56334719 | -10.85617432 | 7.76E-23 | 1.38E-21 | 41.08384941 |
| CARS     | -0.583064016 | 4.35073396 | -10.85559688 | 7.79E-23 | 1.39E-21 | 41.07956478 |
| CISD1    | -0.647368431 | 4.26334048 | -10.85258352 | 7.97E-23 | 1.42E-21 | 41.05720668 |
| ERAL1    | -0.50350561  | 5.74233734 | -10.85050348 | 8.10E-23 | 1.44E-21 | 41.04177485 |
| ACP1     | -0.614726292 | 5.76365433 | -10.85013656 | 8.12E-23 | 1.44E-21 | 41.03905273 |
| BBS4     | -0.773846023 | 4.05943289 | -10.8496993  | 8.15E-23 | 1.45E-21 | 41.03580886 |
| AIFM2    | -0.697810911 | 4.16798433 | -10.84568935 | 8.39E-23 | 1.49E-21 | 41.00606287 |
| NDUFAB   | -0.39016592  | 2.09968497 | -10.84476078 | 8.45E-23 | 1.50E-21 | 40.99917526 |
| WDR25    | -0.711438034 | 3.87669147 | -10.84345932 | 8.54E-23 | 1.51E-21 | 40.98952211 |

|         |              |            |              |          |          |             |
|---------|--------------|------------|--------------|----------|----------|-------------|
| KCNIP3  | -1.351657477 | 3.62929319 | -10.83845274 | 8.86E-23 | 1.57E-21 | 40.95239154 |
| PHKB    | -0.839193727 | 4.45694308 | -10.83476968 | 9.11E-23 | 1.61E-21 | 40.92508067 |
| CHCHD1  | -1.179100569 | 6.37315786 | -10.83168516 | 9.32E-23 | 1.64E-21 | 40.90221072 |
| POMP    | -0.555559412 | 7.43940822 | -10.82899782 | 9.51E-23 | 1.68E-21 | 40.88228765 |
| PPARGC  | -1.627442764 | 2.60074729 | -10.82734209 | 9.63E-23 | 1.69E-21 | 40.87001348 |
| GABARA  | -0.591672514 | 6.87155142 | -10.82671458 | 9.68E-23 | 1.70E-21 | 40.86536182 |
| BUD31   | -0.514074434 | 5.90903392 | -10.82520332 | 9.79E-23 | 1.72E-21 | 40.85415952 |
| C1orf56 | -0.610277867 | 4.55518911 | -10.82326358 | 9.93E-23 | 1.74E-21 | 40.83978183 |
| KLC4    | -0.564528461 | 4.27293186 | -10.82160481 | 1.01E-22 | 1.76E-21 | 40.82748751 |
| NUDT8   | -0.773835372 | 4.35762522 | -10.81769135 | 1.04E-22 | 1.81E-21 | 40.79848489 |
| MAGEH1  | -0.841985273 | 5.76090567 | -10.81736734 | 1.04E-22 | 1.81E-21 | 40.79608385 |
| FLYWCH  | -0.58495479  | 5.84618903 | -10.81628865 | 1.05E-22 | 1.83E-21 | 40.78809046 |
| MPI     | -0.543909092 | 3.9657793  | -10.8153739  | 1.05E-22 | 1.84E-21 | 40.78131212 |
| THNSL1  | -0.727125469 | 3.56298614 | -10.81433633 | 1.06E-22 | 1.85E-21 | 40.77362398 |
| FECH    | -0.751245166 | 4.06713394 | -10.81316191 | 1.07E-22 | 1.87E-21 | 40.7649221  |
| TMEM18  | -0.57664722  | 4.42619551 | -10.81058669 | 1.09E-22 | 1.90E-21 | 40.74584223 |
| ZSWIM7  | -0.674668754 | 4.82999017 | -10.80873548 | 1.11E-22 | 1.92E-21 | 40.73212764 |
| GLRX2   | -0.510331661 | 3.10641911 | -10.8069156  | 1.12E-22 | 1.95E-21 | 40.71864596 |
| FCGBP   | -1.638205879 | 6.62797565 | -10.80521948 | 1.14E-22 | 1.97E-21 | 40.70608187 |
| HAGH    | -0.512898517 | 4.72053019 | -10.8042209  | 1.15E-22 | 1.98E-21 | 40.69868519 |
| PLVAP   | -1.312266015 | 8.8335876  | -10.80388847 | 1.15E-22 | 1.99E-21 | 40.69622286 |
| ATP6V1F | -0.595029339 | 5.38844086 | -10.8028428  | 1.16E-22 | 2.00E-21 | 40.68847769 |
| UBE2M   | -0.506181927 | 6.86069328 | -10.79784642 | 1.20E-22 | 2.07E-21 | 40.65147403 |
| 1-Mar   | -1.336472943 | 3.93862265 | -10.79466637 | 1.23E-22 | 2.12E-21 | 40.62792559 |
| POR     | -0.873392099 | 6.84390831 | -10.78903862 | 1.28E-22 | 2.21E-21 | 40.58625809 |
| COX6B1  | -0.610802691 | 8.86511895 | -10.78641859 | 1.31E-22 | 2.25E-21 | 40.56686228 |
| SERPINE | -0.567468841 | 6.28757199 | -10.78546321 | 1.32E-22 | 2.27E-21 | 40.55979013 |
| LMAN2   | -0.700523669 | 8.19127532 | -10.78088892 | 1.36E-22 | 2.34E-21 | 40.5259325  |
| COPS4   | -0.744791779 | 5.16974092 | -10.775993   | 1.41E-22 | 2.43E-21 | 40.48970018 |
| MRM3    | -0.548009443 | 4.24645591 | -10.77418484 | 1.43E-22 | 2.46E-21 | 40.47632041 |
| EMD     | -0.531235645 | 6.91483606 | -10.77179723 | 1.46E-22 | 2.50E-21 | 40.45865422 |
| RAB17   | -0.821773136 | 4.64139824 | -10.77092429 | 1.47E-22 | 2.51E-21 | 40.45219559 |
| C2orf74 | -0.742479857 | 3.15671469 | -10.7641419  | 1.55E-22 | 2.64E-21 | 40.40202137 |
| ZNF763  | -0.613188155 | 2.17147652 | -10.76203891 | 1.57E-22 | 2.68E-21 | 40.3864664  |
| PEX2    | -0.644280328 | 4.83072089 | -10.76185953 | 1.57E-22 | 2.68E-21 | 40.38513971 |
| ABHD6   | -0.80266277  | 3.36675694 | -10.76006673 | 1.59E-22 | 2.72E-21 | 40.37188005 |
| COPE    | -0.56860181  | 7.31702093 | -10.75697332 | 1.63E-22 | 2.78E-21 | 40.34900303 |
| TMEM23  | -0.462216723 | 0.8709223  | -10.75264149 | 1.68E-22 | 2.87E-21 | 40.31697149 |
| DUSP15  | -1.081275454 | 2.20057175 | -10.74743837 | 1.75E-22 | 2.98E-21 | 40.27850372 |
| SLIRP   | -0.599009383 | 5.14785768 | -10.74498649 | 1.78E-22 | 3.03E-21 | 40.2603788  |

|         |              |            |              |          |          |             |
|---------|--------------|------------|--------------|----------|----------|-------------|
| SMIM30  | -0.616327456 | 6.00409638 | -10.74115671 | 1.84E-22 | 3.11E-21 | 40.23207127 |
| MRPL40  | -0.879210895 | 6.77095785 | -10.73828732 | 1.87E-22 | 3.18E-21 | 40.21086483 |
| ERP44   | -0.674157658 | 5.90970689 | -10.73744626 | 1.89E-22 | 3.19E-21 | 40.20464938 |
| METTL2  | -0.566136681 | 3.03616114 | -10.73698928 | 1.89E-22 | 3.20E-21 | 40.20127229 |
| FN1     | 3.365305375  | 9.07048436 | 10.7293232   | 2.00E-22 | 3.39E-21 | 40.14462863 |
| ATG4C   | -0.730058282 | 3.80409154 | -10.72596362 | 2.06E-22 | 3.47E-21 | 40.11980994 |
| ATP6V0E | -1.157787186 | 6.03613254 | -10.72556474 | 2.06E-22 | 3.48E-21 | 40.11686346 |
| ST6GALI | 2.146533241  | 2.14818163 | 10.72367523  | 2.09E-22 | 3.52E-21 | 40.10290634 |
| ARIH2O5 | -0.658765335 | 2.47633041 | -10.72319828 | 2.10E-22 | 3.53E-21 | 40.09938339 |
| ISCA1   | -0.703803994 | 4.90779546 | -10.72192543 | 2.12E-22 | 3.56E-21 | 40.08998201 |
| MZT2B   | -0.926191874 | 7.07373513 | -10.72078252 | 2.14E-22 | 3.59E-21 | 40.08154068 |
| EMCN    | -1.210471142 | 4.08102145 | -10.71764894 | 2.19E-22 | 3.67E-21 | 40.05839842 |
| FAM192  | -0.480512612 | 5.60856018 | -10.71696796 | 2.20E-22 | 3.68E-21 | 40.05336949 |
| ACAT1   | -0.960389485 | 4.97923892 | -10.71503246 | 2.23E-22 | 3.73E-21 | 40.03907698 |
| RILPL2  | -0.799374588 | 4.90620021 | -10.71438007 | 2.24E-22 | 3.75E-21 | 40.03425966 |
| PGD     | -0.746898587 | 6.95042323 | -10.71282151 | 2.27E-22 | 3.79E-21 | 40.02275159 |
| ADGRV1  | -0.872234036 | 0.86406779 | -10.71106273 | 2.30E-22 | 3.84E-21 | 40.00976593 |
| BCAS2   | -0.617919602 | 6.27874866 | -10.7053723  | 2.40E-22 | 4.00E-21 | 39.96775692 |
| MMACHC  | -0.52215993  | 2.54651838 | -10.70170515 | 2.46E-22 | 4.10E-21 | 39.94068911 |
| SELENO  | -0.59379478  | 5.5029569  | -10.69998848 | 2.50E-22 | 4.15E-21 | 39.92801926 |
| CXXC4   | -1.336300255 | 2.24618791 | -10.69856172 | 2.52E-22 | 4.19E-21 | 39.91748972 |
| DCTPP1  | -0.785692184 | 5.17335958 | -10.69769758 | 2.54E-22 | 4.22E-21 | 39.91111252 |
| RABEPK  | -0.530934384 | 3.85243761 | -10.69609282 | 2.57E-22 | 4.26E-21 | 39.89927034 |
| CPQ     | -1.146412305 | 7.26724785 | -10.69175937 | 2.65E-22 | 4.40E-21 | 39.8672953  |
| UBL5    | -0.634867398 | 7.52901596 | -10.69030052 | 2.68E-22 | 4.44E-21 | 39.85653204 |
| POLB    | -0.464942228 | 3.38131305 | -10.68957269 | 2.70E-22 | 4.46E-21 | 39.8511624  |
| ACACB   | -0.927252285 | 2.78367751 | -10.67448434 | 3.02E-22 | 4.99E-21 | 39.73987771 |
| MAGOH   | -0.570704471 | 5.85188304 | -10.6738359  | 3.03E-22 | 5.01E-21 | 39.73509644 |
| KCNE3   | -1.459385734 | 3.30136992 | -10.67265083 | 3.06E-22 | 5.05E-21 | 39.72635862 |
| LRP1B   | -1.141938903 | 0.7650378  | -10.67223189 | 3.07E-22 | 5.06E-21 | 39.72326977 |
| PYGM    | -1.547759841 | 1.81497545 | -10.67107907 | 3.10E-22 | 5.10E-21 | 39.71477027 |
| ARFIP2  | -0.604141691 | 5.18697983 | -10.67087007 | 3.10E-22 | 5.10E-21 | 39.71322939 |
| C6orf52 | -0.76619614  | 1.23630523 | -10.67010396 | 3.12E-22 | 5.12E-21 | 39.70758119 |
| SLC39A1 | -0.915222531 | 4.69990478 | -10.66913792 | 3.14E-22 | 5.16E-21 | 39.70045933 |
| HYOU1   | -1.3542628   | 6.04102774 | -10.66768094 | 3.17E-22 | 5.21E-21 | 39.68971849 |
| TOMM22  | -0.552472806 | 6.25786467 | -10.66726139 | 3.18E-22 | 5.22E-21 | 39.68662574 |
| ELP4    | -0.543716488 | 3.62804395 | -10.66660545 | 3.20E-22 | 5.24E-21 | 39.6817904  |
| DPY30   | -0.633763241 | 5.78051879 | -10.66523258 | 3.23E-22 | 5.29E-21 | 39.67167054 |
| SNRPN   | -0.813762221 | 7.54481398 | -10.66166167 | 3.32E-22 | 5.43E-21 | 39.64535064 |
| APRT    | -0.579330244 | 7.15214779 | -10.65740979 | 3.43E-22 | 5.59E-21 | 39.61401593 |

|          |              |            |              |          |          |             |
|----------|--------------|------------|--------------|----------|----------|-------------|
| TPST2    | -0.98375178  | 5.10767668 | -10.65706883 | 3.44E-22 | 5.60E-21 | 39.61150338 |
| TMEM17   | -0.566664509 | 3.46927078 | -10.656108   | 3.46E-22 | 5.64E-21 | 39.60442315 |
| COLEC1   | -1.347877952 | 2.13735488 | -10.6549499  | 3.49E-22 | 5.68E-21 | 39.59588961 |
| C4orf33  | -0.729409963 | 2.40808831 | -10.65184125 | 3.57E-22 | 5.81E-21 | 39.57298508 |
| NUDT7    | -0.670302954 | 2.81447138 | -10.65173168 | 3.58E-22 | 5.81E-21 | 39.57217782 |
| CGNL1    | -1.526281144 | 4.85119076 | -10.65014113 | 3.62E-22 | 5.87E-21 | 39.56045973 |
| ARL16    | -0.669504196 | 5.09207904 | -10.64734684 | 3.69E-22 | 5.99E-21 | 39.53987484 |
| ZNF599   | -0.545995294 | 2.35677777 | -10.64611136 | 3.73E-22 | 6.04E-21 | 39.53077398 |
| LAMTOR   | -0.743128425 | 6.70978917 | -10.64522814 | 3.75E-22 | 6.07E-21 | 39.52426822 |
| MRPS21   | -0.550919031 | 7.13420984 | -10.64428812 | 3.78E-22 | 6.11E-21 | 39.51734432 |
| UBE3D    | -0.399887746 | 1.5344292  | -10.64399408 | 3.79E-22 | 6.12E-21 | 39.51517857 |
| INSL3    | 0.919021917  | 0.9956942  | 10.63737057  | 3.98E-22 | 6.42E-21 | 39.46639888 |
| DUSP22   | -0.523406514 | 4.52927068 | -10.63516369 | 4.04E-22 | 6.52E-21 | 39.45014862 |
| FBXO8    | -0.645895943 | 4.77069985 | -10.63403604 | 4.08E-22 | 6.57E-21 | 39.44184573 |
| SPAAR    | -0.809545951 | 1.73198794 | -10.63384581 | 4.08E-22 | 6.57E-21 | 39.44044506 |
| NME4     | -0.72304945  | 5.73196624 | -10.63345351 | 4.10E-22 | 6.59E-21 | 39.4375567  |
| HLF      | -1.635816319 | 3.08830164 | -10.62974905 | 4.21E-22 | 6.76E-21 | 39.41028362 |
| STRAP    | -0.693405708 | 7.19270519 | -10.62766907 | 4.28E-22 | 6.86E-21 | 39.39497196 |
| DNAJC3   | -0.507740713 | 5.11277153 | -10.62661286 | 4.31E-22 | 6.91E-21 | 39.38719716 |
| TRIM16L  | -0.932989696 | 2.19078675 | -10.62636751 | 4.32E-22 | 6.92E-21 | 39.38539123 |
| ALAS1    | -0.738138973 | 5.91532261 | -10.62480796 | 4.37E-22 | 6.99E-21 | 39.37391196 |
| FAM32A   | -0.464968736 | 6.7279549  | -10.62289066 | 4.43E-22 | 7.08E-21 | 39.35980034 |
| PARL     | -0.528781496 | 6.00361667 | -10.62249236 | 4.44E-22 | 7.10E-21 | 39.35686892 |
| OXNAD1   | -0.483258257 | 2.93557987 | -10.61969061 | 4.54E-22 | 7.24E-21 | 39.33624968 |
| MRPL57   | -0.553426661 | 6.21626445 | -10.61880937 | 4.57E-22 | 7.28E-21 | 39.32976468 |
| C12orf57 | -0.720340253 | 6.76622925 | -10.61805509 | 4.59E-22 | 7.32E-21 | 39.32421417 |
| CDC26    | -0.630678567 | 4.1749627  | -10.61253942 | 4.79E-22 | 7.61E-21 | 39.28363058 |
| KLHDC8   | -0.692774934 | 6.25372292 | -10.60629991 | 5.01E-22 | 7.97E-21 | 39.23773096 |
| COA1     | -0.487846909 | 3.19726322 | -10.60597418 | 5.02E-22 | 7.97E-21 | 39.23533505 |
| IGSF22   | -0.54348837  | 1.54723495 | -10.60595425 | 5.03E-22 | 7.97E-21 | 39.23518849 |
| BCL7B    | -0.465458942 | 5.60887308 | -10.60579243 | 5.03E-22 | 7.98E-21 | 39.23399822 |
| SNN      | -0.77347076  | 5.63428699 | -10.60498406 | 5.06E-22 | 8.02E-21 | 39.22805247 |
| MED7     | -0.498402539 | 3.9047119  | -10.60068822 | 5.23E-22 | 8.27E-21 | 39.19645856 |
| TMEM18   | -0.55950929  | 4.05674917 | -10.59601314 | 5.41E-22 | 8.55E-21 | 39.16208114 |
| PPIF     | -0.961957897 | 5.73093341 | -10.59485489 | 5.46E-22 | 8.62E-21 | 39.15356505 |
| JMJD8    | -0.682478624 | 6.14393472 | -10.59402671 | 5.49E-22 | 8.66E-21 | 39.14747609 |
| STKLD1   | -0.420634245 | 0.94302843 | -10.59398854 | 5.49E-22 | 8.66E-21 | 39.14719541 |
| ZNF684   | -0.548415849 | 1.96530481 | -10.5926363  | 5.55E-22 | 8.74E-21 | 39.13725382 |
| FBXO9    | -0.792797838 | 4.23093031 | -10.59158852 | 5.59E-22 | 8.80E-21 | 39.1295509  |
| DNAJC2   | -0.641740708 | 3.57619179 | -10.59145405 | 5.60E-22 | 8.80E-21 | 39.12856232 |

|         |              |            |              |          |          |             |
|---------|--------------|------------|--------------|----------|----------|-------------|
| STX18   | -0.462820061 | 3.91959115 | -10.58997114 | 5.66E-22 | 8.89E-21 | 39.11766103 |
| PSMD6   | -0.45523457  | 4.26033172 | -10.58764471 | 5.76E-22 | 9.03E-21 | 39.10056    |
| PITHD1  | -0.555607412 | 6.05103463 | -10.58516437 | 5.87E-22 | 9.19E-21 | 39.08232926 |
| FAXDC2  | -1.111501613 | 4.06588533 | -10.58360984 | 5.93E-22 | 9.29E-21 | 39.07090408 |
| RDH14   | -0.574761144 | 4.97727191 | -10.58348834 | 5.94E-22 | 9.29E-21 | 39.07001115 |
| FAM53A  | -0.56682671  | 1.66315795 | -10.57966373 | 6.11E-22 | 9.55E-21 | 39.04190476 |
| DCUN1D  | -0.579887521 | 4.35928409 | -10.5795614  | 6.11E-22 | 9.55E-21 | 39.04115285 |
| PPM1L   | -1.229977362 | 2.86694629 | -10.57625944 | 6.27E-22 | 9.78E-21 | 39.01689062 |
| DGLUCY  | -0.599447822 | 4.45081607 | -10.57448044 | 6.35E-22 | 9.90E-21 | 39.00382    |
| ANAPC1  | -0.621177757 | 5.46264263 | -10.57230367 | 6.45E-22 | 1.01E-20 | 38.98782815 |
| MRPS15  | -0.475688355 | 5.66640274 | -10.57158084 | 6.49E-22 | 1.01E-20 | 38.9825181  |
| ACSS1   | -0.775409514 | 4.3026737  | -10.57089421 | 6.52E-22 | 1.01E-20 | 38.97747411 |
| CSRP2   | -0.915460416 | 3.30786268 | -10.56793924 | 6.67E-22 | 1.04E-20 | 38.95576825 |
| TMPRSS  | 2.99301171   | 3.37259789 | 10.56422994  | 6.85E-22 | 1.06E-20 | 38.92852481 |
| LHPP    | -0.788745178 | 5.6564938  | -10.56414931 | 6.86E-22 | 1.06E-20 | 38.92793266 |
| MTERF4  | -0.689674803 | 3.44970788 | -10.56039899 | 7.05E-22 | 1.09E-20 | 38.90039182 |
| FTCDNL  | -0.871595236 | 2.15650103 | -10.55813669 | 7.17E-22 | 1.11E-20 | 38.88378025 |
| CIAPIN1 | -0.589531056 | 4.73582283 | -10.55615207 | 7.28E-22 | 1.12E-20 | 38.86920873 |
| PDIA6   | -1.261193631 | 7.29064303 | -10.55484574 | 7.35E-22 | 1.13E-20 | 38.85961792 |
| CYB5R1  | -0.602553114 | 5.24906941 | -10.55074555 | 7.57E-22 | 1.17E-20 | 38.82951833 |
| LYRM2   | -0.600902886 | 4.11706735 | -10.54978484 | 7.63E-22 | 1.18E-20 | 38.8224664  |
| CCDC14  | -0.642923691 | 2.79668774 | -10.54949796 | 7.64E-22 | 1.18E-20 | 38.82036069 |
| MTCH2   | -0.569184054 | 6.28213717 | -10.54775081 | 7.74E-22 | 1.19E-20 | 38.80753673 |
| POLR1C  | -0.562797182 | 4.90237971 | -10.54244818 | 8.05E-22 | 1.24E-20 | 38.76862113 |
| UQCRC2  | -0.681686893 | 6.28921021 | -10.53942815 | 8.24E-22 | 1.27E-20 | 38.7464607  |
| EBF4    | -1.974133568 | 4.22116623 | -10.53871212 | 8.28E-22 | 1.27E-20 | 38.74120702 |
| DHRS12  | -0.52603206  | 4.12538946 | -10.53855225 | 8.29E-22 | 1.27E-20 | 38.74003397 |
| CCNC    | -0.679587356 | 4.90518851 | -10.53843375 | 8.30E-22 | 1.27E-20 | 38.73916452 |
| ZC3H8   | -0.625124407 | 2.49537018 | -10.53575821 | 8.46E-22 | 1.30E-20 | 38.71953474 |
| MYDGF   | -0.666231465 | 7.2307041  | -10.53476312 | 8.53E-22 | 1.30E-20 | 38.71223451 |
| SAMM50  | -0.610754353 | 4.24388786 | -10.53166903 | 8.72E-22 | 1.33E-20 | 38.6895372  |
| TMEM19  | -0.467544835 | 3.58252675 | -10.53140091 | 8.74E-22 | 1.33E-20 | 38.6875705  |
| PKNOX2  | -1.946882814 | 2.15974243 | -10.52776666 | 8.98E-22 | 1.37E-20 | 38.66091436 |
| HDHD3   | -0.623447407 | 5.78067695 | -10.52566064 | 9.12E-22 | 1.39E-20 | 38.64546896 |
| MED9    | -0.50821328  | 3.83585055 | -10.52436124 | 9.21E-22 | 1.40E-20 | 38.63593987 |
| NTHL1   | -0.75321182  | 4.00061411 | -10.52417532 | 9.22E-22 | 1.40E-20 | 38.63457649 |
| PTS     | -0.555211766 | 4.3549506  | -10.52384245 | 9.25E-22 | 1.41E-20 | 38.63213549 |
| UFC1    | -0.489856869 | 7.08355887 | -10.51866239 | 9.61E-22 | 1.46E-20 | 38.59415314 |
| ASB8    | -0.559920192 | 4.58068933 | -10.51389204 | 9.95E-22 | 1.51E-20 | 38.55918137 |
| FAM136A | -0.530852067 | 5.30305975 | -10.5112628  | 1.01E-21 | 1.54E-20 | 38.53990896 |



|         |              |            |              |          |          |             |
|---------|--------------|------------|--------------|----------|----------|-------------|
| VPS45   | -0.530861314 | 4.42481627 | -10.51034678 | 1.02E-21 | 1.55E-20 | 38.53319497 |
| POLR3B  | -0.673655563 | 3.03832595 | -10.51028157 | 1.02E-21 | 1.55E-20 | 38.53271701 |
| SUPT4H  | -0.485680495 | 6.40107894 | -10.51000125 | 1.02E-21 | 1.55E-20 | 38.53066239 |
| AP4S1   | -0.570325212 | 2.78216882 | -10.50822507 | 1.04E-21 | 1.57E-20 | 38.5176446  |
| SYS1    | -0.546200304 | 4.88150695 | -10.50405537 | 1.07E-21 | 1.62E-20 | 38.48708789 |
| PYY     | -0.724555971 | 0.96987902 | -10.50390664 | 1.07E-21 | 1.62E-20 | 38.48599805 |
| C1orf53 | -0.83258305  | 3.17996475 | -10.50359449 | 1.07E-21 | 1.62E-20 | 38.48371077 |
| TKFC    | -0.585225678 | 4.37354649 | -10.50194368 | 1.09E-21 | 1.64E-20 | 38.47161472 |
| RGS16   | -1.386335455 | 6.18824385 | -10.50002601 | 1.10E-21 | 1.66E-20 | 38.45756418 |
| HABP4   | -0.622894134 | 4.244067   | -10.49674988 | 1.13E-21 | 1.70E-20 | 38.43356284 |
| LRRC45  | -0.697231083 | 3.62198436 | -10.49037142 | 1.18E-21 | 1.78E-20 | 38.38684182 |
| RCCD1   | -0.538970945 | 2.54339286 | -10.48977412 | 1.19E-21 | 1.78E-20 | 38.38246728 |
| COX10   | -0.595992248 | 3.48682647 | -10.48617497 | 1.22E-21 | 1.83E-20 | 38.35610972 |
| UROD    | -0.545272491 | 6.58308602 | -10.48528448 | 1.23E-21 | 1.84E-20 | 38.349589   |
| SPIN2B  | -0.50467502  | 2.47738957 | -10.47023406 | 1.38E-21 | 2.06E-20 | 38.23941328 |
| DUSP28  | -0.492132414 | 2.3205286  | -10.46689883 | 1.41E-21 | 2.11E-20 | 38.21500641 |
| MRPL52  | -0.593326055 | 5.28413673 | -10.46631651 | 1.42E-21 | 2.11E-20 | 38.21074541 |
| ARV1    | -0.585857026 | 5.14263114 | -10.46627635 | 1.42E-21 | 2.11E-20 | 38.21045154 |
| SCFD1   | -0.574177454 | 4.7973141  | -10.46514098 | 1.43E-21 | 2.13E-20 | 38.20214396 |
| WDR83C  | -0.597877458 | 7.04447414 | -10.46064026 | 1.48E-21 | 2.20E-20 | 38.16921525 |
| UQCC3   | -0.732483792 | 4.4503948  | -10.45679919 | 1.52E-21 | 2.26E-20 | 38.14111727 |
| SLC25A3 | -0.829989548 | 6.69459457 | -10.4560574  | 1.53E-21 | 2.27E-20 | 38.13569143 |
| POLR2L  | -0.696230336 | 8.01606901 | -10.45564324 | 1.53E-21 | 2.27E-20 | 38.13266211 |
| FARSB   | -0.484814841 | 4.94738363 | -10.45559164 | 1.53E-21 | 2.27E-20 | 38.13228472 |
| KCNQ3   | 1.534645809  | 2.39707868 | 10.45301885  | 1.56E-21 | 2.32E-20 | 38.11346746 |
| TOMM7   | -0.631723722 | 7.85282922 | -10.45042797 | 1.59E-21 | 2.36E-20 | 38.09451989 |
| CYSTM1  | -0.610613085 | 7.32701324 | -10.44877403 | 1.61E-21 | 2.39E-20 | 38.08242524 |
| COPRS   | -0.714879359 | 6.79880831 | -10.44707912 | 1.63E-21 | 2.41E-20 | 38.07003181 |
| CZIB    | -0.533070418 | 4.85975846 | -10.44665424 | 1.64E-21 | 2.42E-20 | 38.06692514 |
| PRDX3   | -0.698775855 | 7.21702033 | -10.44375983 | 1.67E-21 | 2.47E-20 | 38.045763   |
| RPL6    | -0.582669167 | 8.77048626 | -10.44351646 | 1.68E-21 | 2.47E-20 | 38.04398374 |
| STX5    | -0.608315988 | 6.29751379 | -10.44197135 | 1.69E-21 | 2.50E-20 | 38.03268791 |
| CCDC14  | -1.078346626 | 2.88002395 | -10.44175379 | 1.70E-21 | 2.50E-20 | 38.03109748 |
| ATG3    | -0.5466585   | 4.80159024 | -10.44168977 | 1.70E-21 | 2.50E-20 | 38.03062946 |
| PSMG4   | -0.547517485 | 2.49084757 | -10.44160915 | 1.70E-21 | 2.50E-20 | 38.03004012 |
| DCLK2   | -0.951170964 | 2.56482398 | -10.4384133  | 1.74E-21 | 2.55E-20 | 38.00667868 |
| RPP14   | -0.532001354 | 3.13951769 | -10.43621416 | 1.77E-21 | 2.59E-20 | 37.99060478 |
| KCNN4   | 2.512420846  | 3.91220208 | 10.43491653  | 1.79E-21 | 2.62E-20 | 37.98112076 |
| MRPL39  | -0.454394577 | 5.26145611 | -10.43411574 | 1.80E-21 | 2.63E-20 | 37.97526831 |
| ECH1    | -0.621706367 | 7.45714518 | -10.43365806 | 1.80E-21 | 2.64E-20 | 37.97192349 |

|          |              |            |              |          |          |             |
|----------|--------------|------------|--------------|----------|----------|-------------|
| NUP37    | -0.54879011  | 3.72049664 | -10.4283949  | 1.87E-21 | 2.74E-20 | 37.93346338 |
| PSMC3    | -0.523661199 | 7.27278004 | -10.42481887 | 1.92E-21 | 2.81E-20 | 37.90733628 |
| C12orf43 | -0.412401659 | 3.06574352 | -10.42122907 | 1.98E-21 | 2.88E-20 | 37.88111223 |
| ADI1     | -0.625464619 | 5.43558599 | -10.41701132 | 2.04E-21 | 2.97E-20 | 37.85030553 |
| ABCB6    | -0.69876567  | 1.98356568 | -10.4146957  | 2.07E-21 | 3.02E-20 | 37.83339417 |
| HSD17B1  | -0.530971659 | 1.57032303 | -10.4093977  | 2.16E-21 | 3.14E-20 | 37.79470778 |
| PPP2R3C  | -0.566619866 | 3.45697917 | -10.40883266 | 2.16E-21 | 3.15E-20 | 37.79058228 |
| NDUFS7   | -0.539698417 | 4.357993   | -10.40718522 | 2.19E-21 | 3.18E-20 | 37.77855443 |
| ACVRL1   | -0.933608704 | 4.29709952 | -10.3994973  | 2.32E-21 | 3.37E-20 | 37.72243553 |
| FAM218B  | -0.892581215 | 2.1807783  | -10.39577195 | 2.38E-21 | 3.46E-20 | 37.69524789 |
| TOMM40   | -0.612887905 | 3.80457917 | -10.39533567 | 2.39E-21 | 3.47E-20 | 37.69206415 |
| PSMA2    | -0.504430765 | 3.17104105 | -10.39039449 | 2.48E-21 | 3.59E-20 | 37.65601012 |
| METTL7   | -0.939964965 | 8.27603864 | -10.38920985 | 2.50E-21 | 3.62E-20 | 37.6473672  |
| GALNT1   | -1.128910028 | 4.26654238 | -10.38827211 | 2.52E-21 | 3.64E-20 | 37.64052594 |
| OR2W3    | -1.406561819 | 2.88324232 | -10.38179252 | 2.64E-21 | 3.82E-20 | 37.59326099 |
| FDFT1    | -0.633481078 | 5.28423024 | -10.37864662 | 2.70E-21 | 3.90E-20 | 37.57031773 |
| WNT4     | -1.645824508 | 1.83786007 | -10.37756631 | 2.73E-21 | 3.93E-20 | 37.56243963 |
| WDR93    | -0.64541068  | 1.13755149 | -10.37699916 | 2.74E-21 | 3.95E-20 | 37.5583038  |
| COPS8    | -0.513017034 | 4.85412944 | -10.37428756 | 2.79E-21 | 4.02E-20 | 37.53853145 |
| TXNRD2   | -0.54467536  | 3.41204771 | -10.3730391  | 2.82E-21 | 4.06E-20 | 37.52942866 |
| HIBCH    | -0.622393265 | 4.14700425 | -10.36981731 | 2.89E-21 | 4.15E-20 | 37.50593999 |
| SLC39A1  | -1.169240084 | 5.75211334 | -10.36757053 | 2.93E-21 | 4.21E-20 | 37.48956144 |
| C12orf60 | -0.376262112 | 0.84982645 | -10.36628199 | 2.96E-21 | 4.25E-20 | 37.48016894 |
| CKB      | -1.284388454 | 7.34646431 | -10.36396447 | 3.01E-21 | 4.32E-20 | 37.46327702 |
| PPIE     | -0.525728271 | 4.43330256 | -10.36092579 | 3.08E-21 | 4.41E-20 | 37.44113111 |
| LRRIQ3   | -0.412150845 | 0.49936197 | -10.3596365  | 3.11E-21 | 4.45E-20 | 37.43173558 |
| SLC35G   | -0.77653628  | 1.88969418 | -10.35958265 | 3.11E-21 | 4.45E-20 | 37.43134315 |
| MRPL53   | -0.58216279  | 2.57659833 | -10.35685217 | 3.18E-21 | 4.54E-20 | 37.4114467  |
| NSDHL    | -0.55542352  | 5.21480741 | -10.35462214 | 3.23E-21 | 4.61E-20 | 37.39519852 |
| ADAMTS1  | 1.199154806  | 1.2778486  | 10.34754396  | 3.40E-21 | 4.85E-20 | 37.34363567 |
| SOCS2    | -0.902036829 | 2.83534142 | -10.34613964 | 3.44E-21 | 4.90E-20 | 37.33340726 |
| PRKG1    | -1.183725172 | 2.46546599 | -10.3452769  | 3.46E-21 | 4.93E-20 | 37.32712373 |
| ADM2     | -1.645937314 | 3.77482413 | -10.34493949 | 3.47E-21 | 4.93E-20 | 37.32466633 |
| UMPS     | -0.557305198 | 3.42845063 | -10.34433816 | 3.48E-21 | 4.95E-20 | 37.32028694 |
| SPHK2    | -0.714348332 | 3.42952089 | -10.34135606 | 3.56E-21 | 5.06E-20 | 37.2985701  |
| SLC27A5  | -0.53311769  | 1.98168974 | -10.34057045 | 3.58E-21 | 5.08E-20 | 37.29284942 |
| PYCR3    | -0.625538827 | 4.12738285 | -10.33875715 | 3.63E-21 | 5.15E-20 | 37.27964591 |
| IMP3     | -0.534630305 | 5.67858761 | -10.33795141 | 3.65E-21 | 5.17E-20 | 37.27377916 |
| TOR2A    | -0.607936511 | 3.29722734 | -10.33748028 | 3.66E-21 | 5.19E-20 | 37.2703489  |
| UFD1     | -0.532696688 | 4.13769417 | -10.33670718 | 3.68E-21 | 5.21E-20 | 37.2647202  |

|          |              |            |              |          |          |             |
|----------|--------------|------------|--------------|----------|----------|-------------|
| SPG7     | -0.646143622 | 4.66332979 | -10.33275196 | 3.79E-21 | 5.36E-20 | 37.23592591 |
| AP5S1    | -0.52419331  | 3.54806796 | -10.32746689 | 3.94E-21 | 5.57E-20 | 37.1974573  |
| DDRK1    | -0.67751851  | 6.96155498 | -10.32643477 | 3.97E-21 | 5.61E-20 | 37.1899457  |
| UBAC1    | -0.461692209 | 5.05567969 | -10.32579026 | 3.99E-21 | 5.63E-20 | 37.18525526 |
| FBLN7    | -0.994384315 | 2.895563   | -10.32304323 | 4.07E-21 | 5.74E-20 | 37.16526482 |
| MIA2     | -0.600908642 | 1.9211585  | -10.3219713  | 4.11E-21 | 5.78E-20 | 37.15746485 |
| PDGFD    | -1.160293676 | 4.20242425 | -10.32109047 | 4.13E-21 | 5.81E-20 | 37.15105575 |
| COA8     | -0.582083222 | 4.41786111 | -10.32007677 | 4.16E-21 | 5.85E-20 | 37.14368008 |
| C16orf86 | -0.799797389 | 2.01757845 | -10.31930714 | 4.19E-21 | 5.88E-20 | 37.13808041 |
| HERPUD   | -0.860991932 | 6.58915382 | -10.31457184 | 4.34E-21 | 6.08E-20 | 37.10363139 |
| SLC25A1  | -1.484267068 | 3.82341731 | -10.31171218 | 4.43E-21 | 6.21E-20 | 37.08283069 |
| SNU13    | -0.563616221 | 7.29018364 | -10.31134848 | 4.44E-21 | 6.22E-20 | 37.08018537 |
| CCDC96   | -0.608887867 | 2.41614989 | -10.31118524 | 4.44E-21 | 6.22E-20 | 37.07899808 |
| ROPN1L   | -0.516145525 | 0.60880077 | -10.30880703 | 4.52E-21 | 6.32E-20 | 37.06170152 |
| NHLRC1   | -0.713691704 | 2.58426528 | -10.3082253  | 4.54E-21 | 6.35E-20 | 37.05747089 |
| AAMP     | -0.617743067 | 6.94927573 | -10.30547612 | 4.64E-21 | 6.47E-20 | 37.03747878 |
| ANAPC7   | -0.400213964 | 4.51815185 | -10.30024126 | 4.82E-21 | 6.72E-20 | 36.99941684 |
| SLC35D2  | -0.753980503 | 5.21307365 | -10.29468807 | 5.02E-21 | 6.99E-20 | 36.95904906 |
| VTI1B    | -0.534534416 | 5.46115854 | -10.29465848 | 5.02E-21 | 6.99E-20 | 36.95883399 |
| GNAI1    | -1.208320685 | 3.82267217 | -10.29059561 | 5.17E-21 | 7.19E-20 | 36.92930544 |
| AP2S1    | -0.545611423 | 6.42080188 | -10.28619744 | 5.34E-21 | 7.43E-20 | 36.89734541 |
| GNG7     | -0.564793625 | 3.55413402 | -10.28437544 | 5.41E-21 | 7.52E-20 | 36.88410723 |
| NRSN2    | -0.575792937 | 5.83742653 | -10.28024046 | 5.58E-21 | 7.74E-20 | 36.85406702 |
| ALKBH4   | -0.610985626 | 4.72142556 | -10.27901651 | 5.63E-21 | 7.81E-20 | 36.84517609 |
| FBXO15   | -0.471901185 | 0.6472006  | -10.27875136 | 5.64E-21 | 7.82E-20 | 36.84325007 |
| HIST1H3  | -0.499261678 | 0.6359301  | -10.27823765 | 5.66E-21 | 7.84E-20 | 36.83951866 |
| ACOT13   | -0.443136518 | 4.26839505 | -10.27819207 | 5.66E-21 | 7.84E-20 | 36.83918756 |
| CFAP36   | -0.550683004 | 6.00423601 | -10.27494538 | 5.80E-21 | 8.02E-20 | 36.81560611 |
| OGDHL    | -1.747857249 | 3.67858824 | -10.26988097 | 6.02E-21 | 8.31E-20 | 36.77882832 |
| BEX2     | -0.828657095 | 7.37013856 | -10.26985028 | 6.02E-21 | 8.31E-20 | 36.77860552 |
| PRKCQ    | -0.894076587 | 4.25967762 | -10.26736309 | 6.13E-21 | 8.46E-20 | 36.76054628 |
| CFAP20   | -0.536610269 | 5.30023981 | -10.26397137 | 6.29E-21 | 8.66E-20 | 36.73592232 |
| HIBADH   | -0.871162716 | 6.52392752 | -10.25774431 | 6.58E-21 | 9.06E-20 | 36.69072236 |
| ESRRA    | -0.731475942 | 5.05401167 | -10.25711612 | 6.61E-21 | 9.10E-20 | 36.68616326 |
| DHODH    | -0.474613013 | 2.26697074 | -10.24490817 | 7.23E-21 | 9.94E-20 | 36.59758556 |
| POMGN1   | -0.671000729 | 4.89961966 | -10.23700596 | 7.66E-21 | 1.05E-19 | 36.54027258 |
| SEN8     | -0.565233211 | 2.17860344 | -10.2360828  | 7.72E-21 | 1.06E-19 | 36.53357828 |
| TOMM40   | -0.471745332 | 5.20797866 | -10.23598133 | 7.72E-21 | 1.06E-19 | 36.5328425  |
| GEMIN7   | -0.496362189 | 3.94685849 | -10.23573042 | 7.74E-21 | 1.06E-19 | 36.53102308 |
| TXNDC1   | -0.604527217 | 5.81750869 | -10.23384946 | 7.84E-21 | 1.07E-19 | 36.51738433 |

|          |              |            |              |          |          |             |
|----------|--------------|------------|--------------|----------|----------|-------------|
| SLC25A2  | -0.576129966 | 3.87852401 | -10.23099319 | 8.01E-21 | 1.10E-19 | 36.4966756  |
| CHCHD4   | -0.539813905 | 4.58239311 | -10.22255654 | 8.52E-21 | 1.16E-19 | 36.43552174 |
| MPPE1    | -0.825215182 | 3.50315108 | -10.21635723 | 8.92E-21 | 1.22E-19 | 36.39059888 |
| SLC26A7  | -2.261443479 | 5.82777648 | -10.2120543  | 9.20E-21 | 1.26E-19 | 36.35942465 |
| PRKACB   | -1.107177448 | 4.11322728 | -10.21027485 | 9.32E-21 | 1.27E-19 | 36.34653439 |
| LYRM9    | -0.646805707 | 3.63661731 | -10.2083817  | 9.45E-21 | 1.29E-19 | 36.3328215  |
| LNP1     | -0.854287057 | 3.20563339 | -10.20779501 | 9.49E-21 | 1.29E-19 | 36.32857205 |
| UNC119   | -0.534061259 | 3.76474305 | -10.20271064 | 9.85E-21 | 1.34E-19 | 36.29174998 |
| MCAT     | -0.5785458   | 4.49236209 | -10.20269616 | 9.85E-21 | 1.34E-19 | 36.29164511 |
| SRSF9    | -0.729565582 | 6.02777044 | -10.19774376 | 1.02E-20 | 1.39E-19 | 36.25578615 |
| ORC5     | -0.503034856 | 3.45273708 | -10.19599787 | 1.03E-20 | 1.40E-19 | 36.24314638 |
| OAZ1     | -0.500468965 | 8.33665531 | -10.19471705 | 1.04E-20 | 1.42E-19 | 36.23387413 |
| EIF2B3   | -0.476510167 | 4.28609905 | -10.19449831 | 1.05E-20 | 1.42E-19 | 36.23229066 |
| NUDC     | -0.529045085 | 7.14987679 | -10.19313328 | 1.06E-20 | 1.43E-19 | 36.22240949 |
| SIRT2    | -0.532160841 | 5.06008956 | -10.19211813 | 1.06E-20 | 1.44E-19 | 36.21506133 |
| TG       | -1.830703586 | 12.6676832 | -10.18934941 | 1.09E-20 | 1.47E-19 | 36.19502165 |
| DDX41    | -0.444840896 | 5.46573429 | -10.18871363 | 1.09E-20 | 1.47E-19 | 36.19042029 |
| NOL3     | -0.616656923 | 5.01000528 | -10.18826643 | 1.10E-20 | 1.48E-19 | 36.1871838  |
| FAM204A  | -0.469998772 | 3.05557774 | -10.18789626 | 1.10E-20 | 1.48E-19 | 36.18450479 |
| CDHR3    | -0.471280652 | 0.86120174 | -10.18775463 | 1.10E-20 | 1.48E-19 | 36.18347982 |
| PPP5D1   | -0.307807375 | 0.78221526 | -10.18716599 | 1.10E-20 | 1.49E-19 | 36.17921989 |
| GGTLC1   | -1.096214222 | 1.78059301 | -10.18241371 | 1.14E-20 | 1.54E-19 | 36.14483178 |
| PSMD14   | -0.530569647 | 4.31940511 | -10.18130296 | 1.15E-20 | 1.55E-19 | 36.13679522 |
| EIF3K    | -0.532192925 | 7.48666811 | -10.18113111 | 1.15E-20 | 1.55E-19 | 36.13555195 |
| ACYP1    | -0.655280944 | 3.85879841 | -10.18060459 | 1.16E-20 | 1.55E-19 | 36.13174255 |
| RAP1GA   | -1.500567668 | 6.16600594 | -10.18010288 | 1.16E-20 | 1.56E-19 | 36.12811282 |
| TP53INP  | -0.949629325 | 5.19572813 | -10.17807237 | 1.18E-20 | 1.58E-19 | 36.11342323 |
| LMOD1    | -1.336379502 | 4.05387311 | -10.1778062  | 1.18E-20 | 1.58E-19 | 36.11149775 |
| C17orf75 | -0.531006643 | 3.80445683 | -10.17677028 | 1.19E-20 | 1.59E-19 | 36.10400405 |
| DNAJC21  | -0.59233048  | 2.55112237 | -10.17575184 | 1.20E-20 | 1.60E-19 | 36.09663704 |
| ECSCR    | -0.914390079 | 3.83449006 | -10.17534825 | 1.20E-20 | 1.61E-19 | 36.09371774 |
| CYP46A1  | -0.450698332 | 0.63151991 | -10.17505024 | 1.21E-20 | 1.61E-19 | 36.09156213 |
| C16orf74 | -1.300410621 | 2.66058458 | -10.17294143 | 1.23E-20 | 1.63E-19 | 36.07630935 |
| CLEC3B   | -1.326164438 | 5.97755056 | -10.16826176 | 1.27E-20 | 1.69E-19 | 36.04246654 |
| TMEM14   | -0.622813646 | 7.4718799  | -10.16735954 | 1.28E-20 | 1.70E-19 | 36.03594259 |
| SKA2     | -0.587595254 | 4.96695667 | -10.16677384 | 1.28E-20 | 1.70E-19 | 36.03170749 |
| PRXL2A   | -0.592392736 | 5.47713046 | -10.16480909 | 1.30E-20 | 1.73E-19 | 36.01750146 |
| RUNX1    | 1.280645933  | 2.97999383 | 10.16187522  | 1.33E-20 | 1.76E-19 | 35.99629049 |
| IQGAP2   | -1.617473225 | 3.8262374  | -10.15884326 | 1.36E-20 | 1.80E-19 | 35.97437303 |
| PCYT2    | -0.53153453  | 4.08957641 | -10.15802934 | 1.37E-20 | 1.81E-19 | 35.96848985 |

|         |              |            |              |          |          |             |
|---------|--------------|------------|--------------|----------|----------|-------------|
| TFB2M   | -0.736134413 | 4.59570206 | -10.15577561 | 1.39E-20 | 1.84E-19 | 35.95220035 |
| DCTN2   | -0.488913098 | 6.40214839 | -10.15321245 | 1.42E-20 | 1.87E-19 | 35.93367635 |
| MOAP1   | -0.75760077  | 5.93875578 | -10.15219133 | 1.43E-20 | 1.89E-19 | 35.92629718 |
| KIF6    | -0.445206738 | 0.52730299 | -10.14941875 | 1.46E-20 | 1.92E-19 | 35.90626269 |
| BOLA1   | -0.643130749 | 4.98894266 | -10.14401038 | 1.51E-20 | 2.00E-19 | 35.86718885 |
| TMEM42  | -0.592101679 | 4.53161332 | -10.14300796 | 1.52E-20 | 2.01E-19 | 35.85994769 |
| ETFDH   | -0.662610278 | 3.65004734 | -10.14245899 | 1.53E-20 | 2.02E-19 | 35.85598218 |
| AKTIP   | -0.579293732 | 4.34175841 | -10.14216323 | 1.53E-20 | 2.02E-19 | 35.85384577 |
| EFCC1   | -1.021945961 | 2.11594372 | -10.14173123 | 1.54E-20 | 2.03E-19 | 35.85072534 |
| ZNF691  | -0.564677039 | 4.52959575 | -10.14033293 | 1.55E-20 | 2.05E-19 | 35.84062543 |
| MT1X    | -1.37931902  | 7.72572367 | -10.13681509 | 1.60E-20 | 2.10E-19 | 35.81521872 |
| FRAT2   | -0.57882459  | 3.82838688 | -10.13590579 | 1.61E-20 | 2.11E-19 | 35.8086522  |
| TMEM10  | -0.596488213 | 5.35666269 | -10.13588324 | 1.61E-20 | 2.11E-19 | 35.8084893  |
| DNPH1   | -0.666348063 | 5.62325181 | -10.13313522 | 1.64E-20 | 2.15E-19 | 35.78864581 |
| TTC1    | -0.449355786 | 6.28416553 | -10.13199792 | 1.65E-20 | 2.17E-19 | 35.78043404 |
| TRAPPC  | -0.505629289 | 4.88993492 | -10.13128558 | 1.66E-20 | 2.18E-19 | 35.77529088 |
| PDCD2   | -0.514230516 | 4.4151117  | -10.13116513 | 1.66E-20 | 2.18E-19 | 35.7744212  |
| FASTKD  | -0.594074839 | 3.44009356 | -10.13092243 | 1.67E-20 | 2.18E-19 | 35.77266891 |
| FABP4   | -2.428911576 | 3.2819485  | -10.13034498 | 1.67E-20 | 2.19E-19 | 35.76849985 |
| SEMA3D  | -2.209207445 | 1.96938382 | -10.12971802 | 1.68E-20 | 2.19E-19 | 35.76397337 |
| PFKM    | -0.853804989 | 4.61804362 | -10.12823672 | 1.70E-20 | 2.22E-19 | 35.75327934 |
| EEF1AK1 | -0.538708868 | 3.3900089  | -10.12804276 | 1.70E-20 | 2.22E-19 | 35.75187915 |
| FAM189F | -1.316750436 | 1.54947128 | -10.1272314  | 1.71E-20 | 2.23E-19 | 35.74602198 |
| LEKR1   | -0.498157234 | 0.90643188 | -10.12535625 | 1.73E-20 | 2.26E-19 | 35.73248619 |
| B9D2    | -0.67148342  | 3.91005111 | -10.12384768 | 1.75E-20 | 2.28E-19 | 35.72159733 |
| ENDOG   | -0.687462303 | 3.83992449 | -10.12245537 | 1.77E-20 | 2.30E-19 | 35.71154823 |
| MTG2    | -0.523588213 | 4.0304396  | -10.11891657 | 1.82E-20 | 2.36E-19 | 35.68600929 |
| PIGF    | -0.596953826 | 2.96209105 | -10.11795801 | 1.83E-20 | 2.38E-19 | 35.67909221 |
| HSDL2   | -0.73037558  | 5.64213512 | -10.11034101 | 1.94E-20 | 2.51E-19 | 35.62413672 |
| PSMB7   | -0.450640322 | 7.18219941 | -10.10595143 | 2.00E-20 | 2.59E-19 | 35.59247464 |
| GPD1L   | -0.922633688 | 5.51453876 | -10.10276911 | 2.05E-20 | 2.65E-19 | 35.5695242  |
| BIN1    | -0.627237558 | 4.37940305 | -10.10018277 | 2.08E-20 | 2.70E-19 | 35.55087414 |
| DNAAF4  | -0.570946755 | 2.08593471 | -10.09714509 | 2.13E-20 | 2.75E-19 | 35.52897204 |
| ALDH7A1 | -0.737285081 | 4.89772635 | -10.09604048 | 2.15E-20 | 2.78E-19 | 35.52100836 |
| LIPT1   | -0.612604766 | 3.49625988 | -10.09480297 | 2.17E-20 | 2.80E-19 | 35.51208704 |
| COX7A2I | -0.50362369  | 5.58001846 | -10.09447676 | 2.17E-20 | 2.80E-19 | 35.50973542 |
| NAPA    | -0.598238133 | 5.36611341 | -10.09307365 | 2.20E-20 | 2.83E-19 | 35.49962092 |
| FAIM    | -0.615836247 | 3.50854212 | -10.09301908 | 2.20E-20 | 2.83E-19 | 35.49922751 |
| QRSL1   | -0.525918364 | 3.72221913 | -10.09229608 | 2.21E-20 | 2.84E-19 | 35.49401595 |
| FAM227E | -0.554574874 | 2.03215895 | -10.09121308 | 2.23E-20 | 2.86E-19 | 35.48620963 |

|         |              |            |              |          |          |             |
|---------|--------------|------------|--------------|----------|----------|-------------|
| KY      | -0.883323039 | 1.28551066 | -10.09071174 | 2.23E-20 | 2.87E-19 | 35.48259614 |
| B4GALT1 | -0.54414655  | 4.53709066 | -10.08953246 | 2.25E-20 | 2.89E-19 | 35.47409646 |
| SPATA7  | -0.569784557 | 2.92490345 | -10.08846024 | 2.27E-20 | 2.91E-19 | 35.46636875 |
| MAPK8IF | -0.751655214 | 3.45073369 | -10.0852271  | 2.32E-20 | 2.98E-19 | 35.44306907 |
| DUOXA2  | -1.90904245  | 5.18522183 | -10.08055025 | 2.41E-20 | 3.08E-19 | 35.409371   |
| UBE2V2  | -0.554112764 | 4.34718198 | -10.0739002  | 2.52E-20 | 3.23E-19 | 35.36146692 |
| TMEM10  | -0.585347342 | 5.53608398 | -10.07377882 | 2.53E-20 | 3.23E-19 | 35.36059267 |
| FUCA2   | -0.511834571 | 6.20294086 | -10.06878804 | 2.62E-20 | 3.35E-19 | 35.32465031 |
| RPF1    | -0.54251296  | 5.75635195 | -10.06817628 | 2.63E-20 | 3.36E-19 | 35.32024513 |
| TMEM17  | -1.450248539 | 3.7825873  | -10.06639014 | 2.67E-20 | 3.40E-19 | 35.30738401 |
| SLC34A2 | 3.742880382  | 8.40538712 | 10.05979411  | 2.80E-20 | 3.57E-19 | 35.25989767 |
| TARBP2  | -0.586405088 | 3.98908242 | -10.05769383 | 2.84E-20 | 3.62E-19 | 35.24478013 |
| ME1     | -1.2033652   | 3.02592743 | -10.05395047 | 2.92E-20 | 3.72E-19 | 35.21783916 |
| SLC16A2 | -1.490921956 | 4.26694955 | -10.05118011 | 2.98E-20 | 3.79E-19 | 35.19790374 |
| MYCT1   | -1.035193705 | 3.68089027 | -10.04962288 | 3.01E-20 | 3.83E-19 | 35.186699   |
| BEAN1   | 1.008129045  | 1.70677828 | 10.04798858  | 3.05E-20 | 3.87E-19 | 35.17494047 |
| UBE2D4  | -0.39804573  | 3.96353429 | -10.04567334 | 3.10E-20 | 3.94E-19 | 35.15828419 |
| TMPRSS2 | 3.370766719  | 2.81449182 | 10.03647634  | 3.32E-20 | 4.21E-19 | 35.09213537 |
| CORO2B  | -1.144981896 | 2.22610037 | -10.03634478 | 3.32E-20 | 4.21E-19 | 35.09118933 |
| TMEM14  | -0.617753354 | 7.18211113 | -10.03406382 | 3.37E-20 | 4.27E-19 | 35.07478786 |
| PROX1   | -1.042185716 | 1.76173352 | -10.03354199 | 3.39E-20 | 4.29E-19 | 35.07103575 |
| THAP4   | -0.502253835 | 5.39220409 | -10.0322514  | 3.42E-20 | 4.32E-19 | 35.06175658 |
| GRB14   | -0.830844129 | 2.03431739 | -10.0314766  | 3.44E-20 | 4.34E-19 | 35.05618612 |
| VIPR1   | -1.041991943 | 1.44241465 | -10.02997807 | 3.48E-20 | 4.39E-19 | 35.04541279 |
| CKMT2   | -1.470830483 | 2.81130792 | -10.02834309 | 3.52E-20 | 4.44E-19 | 35.03365935 |
| ZFAND2  | -0.711177346 | 4.55435738 | -10.02798493 | 3.53E-20 | 4.45E-19 | 35.03108479 |
| DTWD1   | -0.492865154 | 2.24340114 | -10.02768839 | 3.53E-20 | 4.45E-19 | 35.02895311 |
| TMEM59  | -0.658249767 | 6.98490695 | -10.02719858 | 3.55E-20 | 4.47E-19 | 35.02543226 |
| TBCA    | -0.572403033 | 6.45844637 | -10.02607766 | 3.58E-20 | 4.50E-19 | 35.01737515 |
| HADH    | -0.642670328 | 5.71538674 | -10.02531653 | 3.60E-20 | 4.52E-19 | 35.01190442 |
| FBXO10  | -0.660855949 | 1.88002856 | -10.02502183 | 3.60E-20 | 4.53E-19 | 35.00978628 |
| AIMP2   | -0.743358892 | 4.84701024 | -10.02493139 | 3.61E-20 | 4.53E-19 | 35.00913625 |
| TSACC   | -0.448106251 | 0.79413327 | -10.02444507 | 3.62E-20 | 4.54E-19 | 35.00564086 |
| MAGED2  | -0.649329716 | 8.21295173 | -10.02297435 | 3.66E-20 | 4.58E-19 | 34.99507074 |
| CCDC28  | -0.644343579 | 6.56086836 | -10.02079009 | 3.72E-20 | 4.65E-19 | 34.97937362 |
| TRIM41  | -0.565095603 | 3.62348625 | -10.02015319 | 3.73E-20 | 4.67E-19 | 34.97479679 |
| IGFBPL1 | -1.67732349  | 2.08828408 | -10.01580629 | 3.85E-20 | 4.82E-19 | 34.94356323 |
| C9orf78 | -0.475846266 | 5.6324061  | -10.01463756 | 3.89E-20 | 4.86E-19 | 34.93516658 |
| PLPP1   | -1.079203878 | 6.44048752 | -10.01092405 | 3.99E-20 | 4.99E-19 | 34.90849002 |
| GPAT3   | -1.105200949 | 4.47751681 | -10.00468878 | 4.18E-20 | 5.21E-19 | 34.86370775 |

|         |              |            |              |          |          |             |
|---------|--------------|------------|--------------|----------|----------|-------------|
| SERF2   | -0.588458581 | 7.45168129 | -10.00326407 | 4.22E-20 | 5.26E-19 | 34.85347704 |
| MAPKAP  | -0.568459933 | 5.28912557 | -9.995938941 | 4.45E-20 | 5.55E-19 | 34.80088606 |
| CFAP206 | -0.191250347 | 0.23022781 | -9.995829146 | 4.45E-20 | 5.55E-19 | 34.80009791 |
| CCM2L   | -0.872893669 | 2.97230531 | -9.994746449 | 4.49E-20 | 5.59E-19 | 34.79232611 |
| TRMT12  | -0.531632086 | 4.10468628 | -9.990125369 | 4.64E-20 | 5.77E-19 | 34.75915928 |
| LARP7   | -0.566650327 | 5.2248816  | -9.989333843 | 4.67E-20 | 5.80E-19 | 34.75347894 |
| KIAA161 | -0.716128981 | 1.98919802 | -9.98724533  | 4.74E-20 | 5.89E-19 | 34.73849179 |
| UFSP1   | -0.666490256 | 2.42846454 | -9.986645236 | 4.76E-20 | 5.91E-19 | 34.73418578 |
| SSBP1   | -0.448541781 | 5.13450096 | -9.986572001 | 4.76E-20 | 5.91E-19 | 34.73366028 |
| STOML2  | -0.508233479 | 7.00302816 | -9.986183417 | 4.78E-20 | 5.92E-19 | 34.73087204 |
| CCDC18  | -0.568991373 | 1.62462553 | -9.985613207 | 4.80E-20 | 5.94E-19 | 34.72678064 |
| PDE6B   | -0.624105656 | 3.27413679 | -9.984860834 | 4.82E-20 | 5.97E-19 | 34.72138234 |
| NFIA    | -0.790992677 | 4.75908391 | -9.981771742 | 4.93E-20 | 6.10E-19 | 34.69921987 |
| LRRC6   | -0.692853157 | 2.82362741 | -9.980989081 | 4.96E-20 | 6.13E-19 | 34.6936052  |
| KIT     | -1.930618111 | 3.3018151  | -9.980191432 | 4.99E-20 | 6.16E-19 | 34.6878832  |
| AAK1    | -0.85092033  | 3.45706985 | -9.979919558 | 5.00E-20 | 6.17E-19 | 34.68593294 |
| MRPL43  | -0.511297464 | 5.99507887 | -9.9792741   | 5.02E-20 | 6.19E-19 | 34.6813029  |
| SLC9A3F | -0.865061138 | 6.48540419 | -9.979022134 | 5.03E-20 | 6.20E-19 | 34.67949552 |
| ABCF3   | -0.487874614 | 5.12197141 | -9.977576019 | 5.09E-20 | 6.26E-19 | 34.66912274 |
| PRSS16  | -0.804329091 | 3.76107858 | -9.973806411 | 5.23E-20 | 6.43E-19 | 34.64208698 |
| KLHDC3  | -0.573577946 | 7.15639157 | -9.972044681 | 5.29E-20 | 6.51E-19 | 34.62945333 |
| ANGPTL  | -1.437555173 | 3.69269763 | -9.971648806 | 5.31E-20 | 6.52E-19 | 34.62661458 |
| GAPDH   | -0.519987566 | 10.6421027 | -9.967909457 | 5.45E-20 | 6.69E-19 | 34.59980279 |
| FAM162  | -0.494384185 | 5.64862006 | -9.963864731 | 5.62E-20 | 6.89E-19 | 34.57080635 |
| ZNF428  | -0.626169647 | 6.24023027 | -9.962179349 | 5.69E-20 | 6.97E-19 | 34.55872546 |
| ZNF396  | -0.572309583 | 2.01280411 | -9.961825675 | 5.70E-20 | 6.98E-19 | 34.55619042 |
| PSMC2   | -0.494936323 | 6.1061824  | -9.961574295 | 5.71E-20 | 6.99E-19 | 34.55438862 |
| PPP1R3  | -0.746960326 | 4.5694624  | -9.960466488 | 5.76E-20 | 7.04E-19 | 34.54644851 |
| UBE2E3  | -0.5978721   | 5.90537339 | -9.960093793 | 5.77E-20 | 7.05E-19 | 34.54377733 |
| NGDN    | -0.493747255 | 4.15273083 | -9.958994268 | 5.82E-20 | 7.11E-19 | 34.5358971  |
| MGAT1   | -0.592741017 | 6.4691547  | -9.958240862 | 5.85E-20 | 7.14E-19 | 34.53049769 |
| TMEM15  | -0.907853302 | 3.79693392 | -9.957803461 | 5.87E-20 | 7.16E-19 | 34.52736308 |
| ZNRD2   | -0.537011835 | 4.99064587 | -9.95407487  | 6.03E-20 | 7.35E-19 | 34.5006447  |
| CCDC65  | -0.74550318  | 2.19422945 | -9.95242217  | 6.10E-20 | 7.43E-19 | 34.48880317 |
| LENG1   | -0.553765455 | 4.72849158 | -9.951290906 | 6.15E-20 | 7.49E-19 | 34.48069821 |
| SNPH    | -0.834706002 | 3.04120681 | -9.947898939 | 6.31E-20 | 7.67E-19 | 34.45639882 |
| TRMT10  | -0.510870514 | 4.77001024 | -9.947118499 | 6.34E-20 | 7.71E-19 | 34.45080841 |
| TATDN3  | -0.446326741 | 3.61479975 | -9.943546622 | 6.51E-20 | 7.90E-19 | 34.42522501 |
| CPT1A   | -0.838843008 | 4.40885462 | -9.94213125  | 6.58E-20 | 7.98E-19 | 34.41508859 |
| TMEM25  | -0.556215332 | 6.05278838 | -9.936244981 | 6.86E-20 | 8.32E-19 | 34.37293992 |

|         |              |            |              |          |          |             |
|---------|--------------|------------|--------------|----------|----------|-------------|
| ABHD10  | -0.552704004 | 5.54786451 | -9.935794899 | 6.88E-20 | 8.34E-19 | 34.36971756 |
| GLA     | -0.515349664 | 4.2820165  | -9.934529752 | 6.95E-20 | 8.41E-19 | 34.36066008 |
| MRPL28  | -0.588366005 | 6.14689617 | -9.933830784 | 6.98E-20 | 8.45E-19 | 34.35565623 |
| MRFAP1  | -0.564581644 | 8.50139437 | -9.933438915 | 7.00E-20 | 8.47E-19 | 34.35285094 |
| FRMD5   | 1.468682098  | 1.89399482 | 9.929818067  | 7.19E-20 | 8.68E-19 | 34.32693252 |
| PFN2    | -0.763258941 | 6.92526635 | -9.92979726  | 7.19E-20 | 8.68E-19 | 34.32678359 |
| RPS6KL  | -0.668889439 | 1.05930704 | -9.928564033 | 7.25E-20 | 8.75E-19 | 34.31795698 |
| TYSND1  | -0.541284707 | 4.17807078 | -9.926894115 | 7.34E-20 | 8.85E-19 | 34.3060056  |
| POLR3F  | -0.487210574 | 3.72789718 | -9.92420921  | 7.49E-20 | 9.02E-19 | 34.28679195 |
| ACOT2   | -0.55598408  | 4.26358462 | -9.922254313 | 7.59E-20 | 9.14E-19 | 34.27280381 |
| VPS4A   | -0.479464592 | 5.37114209 | -9.920442395 | 7.69E-20 | 9.25E-19 | 34.25983984 |
| MRPL49  | -0.684405938 | 6.15877908 | -9.917821758 | 7.84E-20 | 9.43E-19 | 34.24109145 |
| ABHD14I | -0.504926702 | 6.98197713 | -9.916970463 | 7.89E-20 | 9.48E-19 | 34.23500166 |
| TCTN1   | -0.672321366 | 4.0806215  | -9.916614552 | 7.91E-20 | 9.49E-19 | 34.23245569 |
| CETN3   | -0.539634224 | 3.83026142 | -9.913771519 | 8.07E-20 | 9.69E-19 | 34.21211983 |
| SYNE1   | -1.093838995 | 2.63317045 | -9.91168818  | 8.20E-20 | 9.83E-19 | 34.19721961 |
| CD36    | -1.652003249 | 2.92363629 | -9.909680905 | 8.32E-20 | 9.96E-19 | 34.18286471 |
| EFCAB2  | -0.648388154 | 2.60287167 | -9.908682276 | 8.38E-20 | 1.00E-18 | 34.17572356 |
| DLD     | -0.801105306 | 5.19542937 | -9.905022233 | 8.60E-20 | 1.03E-18 | 34.14955349 |
| DIO2    | -1.641227335 | 6.15616326 | -9.903526832 | 8.70E-20 | 1.04E-18 | 34.13886229 |
| PTDSS2  | -0.602330262 | 4.20683748 | -9.90075984  | 8.87E-20 | 1.06E-18 | 34.11908188 |
| R3HCC1  | -0.514098283 | 5.29416052 | -9.900595434 | 8.88E-20 | 1.06E-18 | 34.11790667 |
| TPRKB   | -0.455957404 | 4.32494302 | -9.89923048  | 8.97E-20 | 1.07E-18 | 34.10814999 |
| RSAD1   | -0.486448698 | 5.07164694 | -9.896323265 | 9.16E-20 | 1.09E-18 | 34.08737124 |
| AUP1    | -0.527968377 | 6.94162363 | -9.894458363 | 9.28E-20 | 1.11E-18 | 34.07404364 |
| PRKRIP1 | -0.582391002 | 4.8635694  | -9.893924849 | 9.32E-20 | 1.11E-18 | 34.07023106 |
| PSMA3   | -0.466660028 | 6.06697076 | -9.892945579 | 9.39E-20 | 1.12E-18 | 34.06323329 |
| RIPOR3  | -0.828562537 | 1.09742432 | -9.89283113  | 9.39E-20 | 1.12E-18 | 34.06241546 |
| UFSP2   | -0.630481591 | 5.20136046 | -9.892557526 | 9.41E-20 | 1.12E-18 | 34.06046038 |
| SEC62   | -0.641439997 | 6.52400346 | -9.892116087 | 9.44E-20 | 1.12E-18 | 34.05730605 |
| CXorf58 | -0.228423475 | 0.3777094  | -9.890251126 | 9.57E-20 | 1.14E-18 | 34.04398055 |
| SFTPB   | 3.823812612  | 6.45643155 | 9.88955196   | 9.62E-20 | 1.14E-18 | 34.03898515 |
| KIZ     | -0.685494066 | 3.66446905 | -9.888575863 | 9.69E-20 | 1.15E-18 | 34.03201142 |
| MNAT1   | -0.479375137 | 3.53332789 | -9.880784947 | 1.02E-19 | 1.21E-18 | 33.97636011 |
| RNF14   | -0.555753615 | 5.18292701 | -9.876067365 | 1.06E-19 | 1.25E-18 | 33.94267142 |
| ACAA1   | -0.578017143 | 4.96978182 | -9.87414711  | 1.08E-19 | 1.27E-18 | 33.92896076 |
| RPS6KA1 | -0.882159516 | 2.40156026 | -9.873502072 | 1.08E-19 | 1.28E-18 | 33.92435544 |
| TMEM9B  | -0.618767621 | 6.61926568 | -9.866368622 | 1.14E-19 | 1.34E-18 | 33.87343434 |
| GTF3C1  | -0.874018839 | 5.45994939 | -9.86394951  | 1.16E-19 | 1.37E-18 | 33.85616959 |
| ALKBH3  | -0.467450327 | 4.42718354 | -9.861321825 | 1.18E-19 | 1.39E-18 | 33.83741843 |



|         |              |            |              |          |          |             |
|---------|--------------|------------|--------------|----------|----------|-------------|
| EPHX2   | -0.666230973 | 4.89210136 | -9.860805487 | 1.18E-19 | 1.39E-18 | 33.8337341  |
| SNRNP2  | -0.544022478 | 4.98811058 | -9.856484305 | 1.22E-19 | 1.44E-18 | 33.80290373 |
| ETV2    | -0.522073357 | 1.11581588 | -9.852967758 | 1.25E-19 | 1.47E-18 | 33.77781864 |
| HIGD2A  | -0.543461944 | 7.83071631 | -9.851802693 | 1.26E-19 | 1.49E-18 | 33.7695086  |
| STX8    | -0.526436888 | 4.85807979 | -9.847007031 | 1.31E-19 | 1.54E-18 | 33.7353073  |
| HIST1H1 | -1.551817479 | 7.80970617 | -9.845323478 | 1.32E-19 | 1.55E-18 | 33.72330244 |
| TRMT10  | -0.58321145  | 2.38511211 | -9.844468718 | 1.33E-19 | 1.56E-18 | 33.71720778 |
| BTNL8   | -0.268583216 | 0.24087351 | -9.842956274 | 1.35E-19 | 1.58E-18 | 33.70642425 |
| MAP2K6  | -0.587809145 | 1.069481   | -9.841916746 | 1.36E-19 | 1.59E-18 | 33.69901298 |
| SYS1-DE | -0.414927045 | 0.82791922 | -9.84105093  | 1.37E-19 | 1.60E-18 | 33.69284045 |
| MED20   | -0.583234043 | 4.10632147 | -9.836670907 | 1.41E-19 | 1.65E-18 | 33.66161835 |
| POLE4   | -0.704953209 | 4.94387217 | -9.83486232  | 1.43E-19 | 1.67E-18 | 33.64872802 |
| TRIT1   | -0.655632649 | 4.54313023 | -9.83339955  | 1.44E-19 | 1.69E-18 | 33.63830321 |
| GKAP1   | -0.571283347 | 3.44815979 | -9.833286696 | 1.44E-19 | 1.69E-18 | 33.63749896 |
| ESRRG   | -0.821366109 | 1.32878769 | -9.832936479 | 1.45E-19 | 1.69E-18 | 33.63500317 |
| ATP23   | -0.565176679 | 3.7970931  | -9.830735614 | 1.47E-19 | 1.71E-18 | 33.61931978 |
| PSMF1   | -0.434158646 | 6.24401992 | -9.830512811 | 1.47E-19 | 1.72E-18 | 33.61773217 |
| ZNF219  | -0.828717867 | 4.73396724 | -9.830097004 | 1.48E-19 | 1.72E-18 | 33.61476933 |
| AGBL4   | -0.36381492  | 0.5795364  | -9.828875801 | 1.49E-19 | 1.73E-18 | 33.60606796 |
| ZNF576  | -0.480702747 | 3.68657717 | -9.828172095 | 1.50E-19 | 1.74E-18 | 33.6010541  |
| EDF1    | -0.653079237 | 9.54410921 | -9.823423832 | 1.55E-19 | 1.80E-18 | 33.56722726 |
| TMEM20  | -1.086715427 | 5.46194788 | -9.821303691 | 1.57E-19 | 1.83E-18 | 33.55212566 |
| SPACA9  | -0.658920319 | 4.2324962  | -9.820638617 | 1.58E-19 | 1.84E-18 | 33.54738869 |
| SYBU    | -1.030203703 | 2.62791296 | -9.815274916 | 1.64E-19 | 1.91E-18 | 33.50919116 |
| ASXL3   | -0.642496316 | 0.48515756 | -9.815167536 | 1.65E-19 | 1.91E-18 | 33.50842655 |
| PIGH    | -0.673462553 | 4.50011411 | -9.81453688  | 1.65E-19 | 1.91E-18 | 33.50393598 |
| CLEC14  | -0.967991883 | 5.70990456 | -9.81412191  | 1.66E-19 | 1.92E-18 | 33.50098127 |
| DCTN6   | -0.543983324 | 5.66654268 | -9.808853862 | 1.72E-19 | 1.99E-18 | 33.46347607 |
| NEK11   | -0.662690269 | 3.26242159 | -9.80834445  | 1.73E-19 | 2.00E-18 | 33.45984986 |
| SCGB2A  | -1.528915238 | 2.81210616 | -9.802295232 | 1.81E-19 | 2.08E-18 | 33.41679543 |
| MICOS1  | -0.576944229 | 6.26338438 | -9.80165885  | 1.81E-19 | 2.09E-18 | 33.41226677 |
| NANS    | -0.530709505 | 4.44444603 | -9.800698957 | 1.83E-19 | 2.11E-18 | 33.40543618 |
| NDUFV2  | -0.544502117 | 3.4827368  | -9.798561417 | 1.85E-19 | 2.14E-18 | 33.39022654 |
| CDPF1   | -0.570596402 | 3.92520026 | -9.798418904 | 1.86E-19 | 2.14E-18 | 33.38921254 |
| CDIPT   | -0.473755698 | 6.60733978 | -9.797320605 | 1.87E-19 | 2.15E-18 | 33.38139824 |
| NUDT15  | -0.564077407 | 4.81683302 | -9.794169996 | 1.91E-19 | 2.20E-18 | 33.35898412 |
| FAM234  | -1.009617709 | 2.69224952 | -9.794165946 | 1.91E-19 | 2.20E-18 | 33.35895532 |
| AKT1S1  | -0.480467679 | 4.84451226 | -9.793806507 | 1.92E-19 | 2.20E-18 | 33.35639839 |
| CRY2    | -0.8082925   | 5.07287862 | -9.793708472 | 1.92E-19 | 2.20E-18 | 33.35570102 |
| SAYSD1  | -0.437649526 | 4.44157029 | -9.793520433 | 1.92E-19 | 2.20E-18 | 33.3543634  |

|          |              |            |              |          |          |             |
|----------|--------------|------------|--------------|----------|----------|-------------|
| RNF150   | -1.067034117 | 1.7833513  | -9.793484927 | 1.92E-19 | 2.20E-18 | 33.35411083 |
| PAIP2B   | -0.980113817 | 2.67929029 | -9.791573924 | 1.95E-19 | 2.23E-18 | 33.34051756 |
| ANO10    | -0.493373017 | 4.7040443  | -9.791457155 | 1.95E-19 | 2.23E-18 | 33.33968701 |
| NUBPL    | -0.53472849  | 2.54682572 | -9.789173669 | 1.98E-19 | 2.27E-18 | 33.32344586 |
| BCS1L    | -0.521330173 | 4.00333628 | -9.783853993 | 2.06E-19 | 2.36E-18 | 33.28561669 |
| HMGCR    | -0.861499099 | 4.43104856 | -9.781974282 | 2.09E-19 | 2.39E-18 | 33.27225195 |
| RASIP1   | -0.913698658 | 3.60848405 | -9.78105652  | 2.10E-19 | 2.40E-18 | 33.26572709 |
| TSGA10   | -0.571939736 | 2.32325375 | -9.780680265 | 2.11E-19 | 2.41E-18 | 33.26305217 |
| ALOX5    | 2.374334256  | 4.44263518 | 9.776978876  | 2.17E-19 | 2.47E-18 | 33.23674029 |
| SPARCL   | -1.270864024 | 7.47826891 | -9.772333058 | 2.24E-19 | 2.55E-18 | 33.20372118 |
| HK1      | -0.755423896 | 6.22555302 | -9.765844421 | 2.35E-19 | 2.67E-18 | 33.15761658 |
| ENO4     | -0.372195829 | 0.61788534 | -9.764767459 | 2.37E-19 | 2.69E-18 | 33.14996565 |
| DIS3L    | -0.648283734 | 4.19024843 | -9.75962469  | 2.45E-19 | 2.79E-18 | 33.11343574 |
| NPR1     | -0.897064896 | 2.88946735 | -9.756599797 | 2.51E-19 | 2.85E-18 | 33.09195354 |
| C19orf73 | -0.675374982 | 2.18798294 | -9.755998247 | 2.52E-19 | 2.86E-18 | 33.08768182 |
| AKAP3    | -0.705817482 | 1.26983441 | -9.755598629 | 2.53E-19 | 2.87E-18 | 33.08484411 |
| TFB1M    | -0.502976147 | 3.79810666 | -9.754164156 | 2.55E-19 | 2.89E-18 | 33.0746583  |
| PRKAG1   | -0.527009432 | 5.2413193  | -9.746673744 | 2.69E-19 | 3.05E-18 | 33.02148195 |
| CDC42E1  | 1.108141854  | 3.92178351 | 9.746524436  | 2.70E-19 | 3.05E-18 | 33.02042216 |
| TEFM     | -0.450139735 | 2.54752091 | -9.746519653 | 2.70E-19 | 3.05E-18 | 33.02038821 |
| HADHB    | -0.686993342 | 6.64934536 | -9.746136829 | 2.70E-19 | 3.06E-18 | 33.01767096 |
| ZDHHC4   | -0.610294311 | 5.34167964 | -9.743265938 | 2.76E-19 | 3.12E-18 | 32.99729522 |
| CCT6B    | -0.530680203 | 1.68849425 | -9.741022555 | 2.81E-19 | 3.17E-18 | 32.98137504 |
| AHSA1    | -0.445063221 | 6.13810177 | -9.739287158 | 2.84E-19 | 3.21E-18 | 32.96906093 |
| NDUFB8   | -0.562750078 | 6.00571486 | -9.737820048 | 2.87E-19 | 3.24E-18 | 32.95865132 |
| KDR      | -1.311612604 | 5.22009764 | -9.736781951 | 2.89E-19 | 3.26E-18 | 32.95128613 |
| AFG3L2   | -0.737618574 | 4.74272619 | -9.733758955 | 2.96E-19 | 3.33E-18 | 32.92984033 |
| SLC35A4  | -0.497387701 | 6.02836564 | -9.730939628 | 3.02E-19 | 3.39E-18 | 32.90984214 |
| KCTD15   | -0.935603329 | 3.56712781 | -9.730285838 | 3.03E-19 | 3.41E-18 | 32.90520502 |
| GSS      | -0.44475871  | 6.55187783 | -9.72965713  | 3.04E-19 | 3.42E-18 | 32.90074594 |
| SAR1B    | -0.545677994 | 4.21361352 | -9.729316722 | 3.05E-19 | 3.43E-18 | 32.89833167 |
| DUS1L    | -0.530895903 | 5.33975405 | -9.727368672 | 3.09E-19 | 3.47E-18 | 32.88451627 |
| SLC25A3  | -0.513851499 | 6.9082409  | -9.726257712 | 3.12E-19 | 3.50E-18 | 32.87663801 |
| LDB2     | -0.967717261 | 3.97298105 | -9.725625554 | 3.13E-19 | 3.51E-18 | 32.8721553  |
| C19orf25 | -0.579492307 | 4.40225811 | -9.725399874 | 3.14E-19 | 3.52E-18 | 32.87055501 |
| HIST1H4  | -0.910844627 | 4.28331148 | -9.724396183 | 3.16E-19 | 3.54E-18 | 32.86343808 |
| ACOX2    | -0.749952212 | 4.78068086 | -9.723194415 | 3.19E-19 | 3.57E-18 | 32.85491707 |
| FKBPL    | -0.632052687 | 4.60790383 | -9.720634485 | 3.25E-19 | 3.63E-18 | 32.83676777 |
| FLT1     | -1.229102371 | 4.88866625 | -9.717117144 | 3.33E-19 | 3.72E-18 | 32.8118342  |
| HMGN3    | -0.570181219 | 8.0510463  | -9.71669396  | 3.34E-19 | 3.73E-18 | 32.80883464 |

|         |              |            |              |          |          |             |
|---------|--------------|------------|--------------|----------|----------|-------------|
| DNAL1   | -0.66390775  | 3.13589137 | -9.715428363 | 3.37E-19 | 3.76E-18 | 32.79986433 |
| ITFG2   | -0.594353659 | 4.50808092 | -9.71264319  | 3.44E-19 | 3.83E-18 | 32.78012544 |
| PRMT3   | -0.768105826 | 3.31953918 | -9.712051268 | 3.45E-19 | 3.85E-18 | 32.77593075 |
| PTCD2   | -0.496200743 | 1.97383161 | -9.711207254 | 3.47E-19 | 3.87E-18 | 32.76994978 |
| CCDC12  | -0.669325102 | 2.70700308 | -9.708372119 | 3.55E-19 | 3.95E-18 | 32.74986083 |
| TMEM25  | -0.472479603 | 0.58490137 | -9.708176149 | 3.55E-19 | 3.95E-18 | 32.74847235 |
| ELOVL1  | -0.753071246 | 6.78682438 | -9.707854774 | 3.56E-19 | 3.96E-18 | 32.74619537 |
| ITPA    | -0.569171961 | 6.35833548 | -9.707222666 | 3.58E-19 | 3.97E-18 | 32.74171691 |
| SIL1    | -0.599750762 | 6.33651784 | -9.705626263 | 3.62E-19 | 4.01E-18 | 32.73040706 |
| SHBG    | -0.438277695 | 0.94412434 | -9.700390044 | 3.75E-19 | 4.16E-18 | 32.69331663 |
| TECR    | -0.511524839 | 5.98207529 | -9.700245945 | 3.76E-19 | 4.17E-18 | 32.69229604 |
| CXCL17  | 2.369193743  | 3.53735119 | 9.698155864  | 3.82E-19 | 4.23E-18 | 32.67749375 |
| PRCP    | -0.707051819 | 4.42913802 | -9.696710427 | 3.85E-19 | 4.27E-18 | 32.6672578  |
| NUDT16l | -0.771647877 | 6.18388078 | -9.695524312 | 3.89E-19 | 4.30E-18 | 32.65885877 |
| RBM45   | -0.433914857 | 2.80529712 | -9.693515769 | 3.94E-19 | 4.36E-18 | 32.6446371  |
| DDX1    | -0.601694311 | 6.51287852 | -9.689170474 | 4.07E-19 | 4.50E-18 | 32.61387451 |
| FASTKD  | -0.549758894 | 2.9285276  | -9.688112705 | 4.10E-19 | 4.53E-18 | 32.60638697 |
| LMO2    | -0.842094053 | 4.19567012 | -9.685199402 | 4.19E-19 | 4.62E-18 | 32.58576678 |
| FASTK   | -0.518006144 | 5.69588862 | -9.684069472 | 4.22E-19 | 4.65E-18 | 32.57776998 |
| DHX29   | -0.713261609 | 4.78033131 | -9.679474377 | 4.36E-19 | 4.81E-18 | 32.54525373 |
| TMSB15l | -1.097961614 | 1.83999866 | -9.678831072 | 4.38E-19 | 4.83E-18 | 32.54070208 |
| BUD23   | -0.496275222 | 5.1421196  | -9.677737965 | 4.42E-19 | 4.86E-18 | 32.53296821 |
| H2AFV   | -0.547176701 | 6.32202669 | -9.67731132  | 4.43E-19 | 4.87E-18 | 32.52994976 |
| TCEAL1  | -0.6337701   | 5.46732509 | -9.67466087  | 4.51E-19 | 4.96E-18 | 32.51119957 |
| FZD4    | -0.869563201 | 4.20644225 | -9.67367057  | 4.55E-19 | 4.99E-18 | 32.50419445 |
| RPS27A  | -0.639766834 | 8.73693131 | -9.671216992 | 4.63E-19 | 5.08E-18 | 32.48683994 |
| IPO13   | -0.591849699 | 5.4565059  | -9.669500361 | 4.68E-19 | 5.14E-18 | 32.47469917 |
| ERGIC3  | -0.541116108 | 7.08156632 | -9.668907701 | 4.70E-19 | 5.16E-18 | 32.47050784 |
| TBC1D2l | -0.589705656 | 3.03307772 | -9.667930554 | 4.74E-19 | 5.19E-18 | 32.46359767 |
| NDUFA3  | -0.669811148 | 6.21514305 | -9.66692295  | 4.77E-19 | 5.22E-18 | 32.45647244 |
| TMEM17  | -0.556443912 | 4.61489269 | -9.666177856 | 4.80E-19 | 5.25E-18 | 32.45120377 |
| ANKEF1  | -0.814991538 | 2.91440399 | -9.663923275 | 4.88E-19 | 5.33E-18 | 32.43526242 |
| NEK5    | -0.295472822 | 0.59089364 | -9.663297487 | 4.90E-19 | 5.35E-18 | 32.430838   |
| EID1    | -0.629149458 | 8.3261074  | -9.663036751 | 4.91E-19 | 5.36E-18 | 32.4289946  |
| ZFAND6  | -0.594408431 | 5.92149722 | -9.662872401 | 4.91E-19 | 5.36E-18 | 32.42783265 |
| TM4SF1l | -1.054776393 | 3.40729496 | -9.662288596 | 4.93E-19 | 5.38E-18 | 32.42370526 |
| SDF4    | -0.555705883 | 6.70856676 | -9.66048282  | 5.00E-19 | 5.45E-18 | 32.4109395  |
| CRABP1  | -2.824350565 | 4.90812375 | -9.660236119 | 5.01E-19 | 5.45E-18 | 32.40919555 |
| PHB     | -0.540335679 | 6.22622336 | -9.65879555  | 5.06E-19 | 5.51E-18 | 32.3990125  |
| CATIP   | -0.682154109 | 1.91650809 | -9.657351972 | 5.11E-19 | 5.56E-18 | 32.38880888 |

|         |              |            |              |          |          |             |
|---------|--------------|------------|--------------|----------|----------|-------------|
| SKP1    | -0.59357929  | 6.17153371 | -9.653841898 | 5.24E-19 | 5.70E-18 | 32.36400163 |
| RIMKLA  | -0.60501724  | 0.69707311 | -9.652412072 | 5.29E-19 | 5.75E-18 | 32.35389761 |
| CBR4    | -0.67887479  | 4.33292952 | -9.651454794 | 5.33E-19 | 5.79E-18 | 32.3471333  |
| HADHA   | -0.589936223 | 7.29734432 | -9.65016489  | 5.38E-19 | 5.84E-18 | 32.33801907 |
| EXOSC7  | -0.522090942 | 4.70237534 | -9.649626365 | 5.40E-19 | 5.86E-18 | 32.33421412 |
| C2orf15 | -0.61544079  | 3.20381516 | -9.640315776 | 5.77E-19 | 6.25E-18 | 32.26844565 |
| NAIF1   | -0.440422014 | 3.19520742 | -9.640305434 | 5.77E-19 | 6.25E-18 | 32.26837262 |
| RAD51D  | -0.456858003 | 2.28979348 | -9.6389624   | 5.83E-19 | 6.31E-18 | 32.25888809 |
| TALDO1  | -0.66507538  | 7.57655813 | -9.638123649 | 5.86E-19 | 6.34E-18 | 32.25296512 |
| GAR1    | -0.500644627 | 4.54184288 | -9.638007018 | 5.87E-19 | 6.34E-18 | 32.25214154 |
| RARB    | -0.917124132 | 2.95686745 | -9.637860378 | 5.87E-19 | 6.35E-18 | 32.25110605 |
| SLC29A4 | -1.443265706 | 2.2029662  | -9.634464846 | 6.02E-19 | 6.50E-18 | 32.22713075 |
| BANP    | -0.479004199 | 2.35245278 | -9.634350271 | 6.02E-19 | 6.50E-18 | 32.22632182 |
| ITM2A   | -1.157060639 | 5.95460856 | -9.633947015 | 6.04E-19 | 6.51E-18 | 32.22347478 |
| UBE2O   | -0.683776331 | 4.45044141 | -9.630270603 | 6.20E-19 | 6.68E-18 | 32.19752131 |
| EIF4E2  | -0.409555647 | 4.494084   | -9.629833848 | 6.22E-19 | 6.70E-18 | 32.19443837 |
| TEX261  | -0.657468758 | 6.27939005 | -9.626067398 | 6.39E-19 | 6.88E-18 | 32.16785463 |
| TSPAN1  | -0.73182587  | 4.34705726 | -9.625695205 | 6.41E-19 | 6.89E-18 | 32.16522794 |
| MAGT1   | -0.890993198 | 6.48152805 | -9.623695347 | 6.50E-19 | 6.99E-18 | 32.15111151 |
| FAM241E | -0.586782143 | 4.41475673 | -9.619234212 | 6.71E-19 | 7.21E-18 | 32.11963813 |
| COMMD1  | -0.323405271 | 4.03600012 | -9.618393071 | 6.75E-19 | 7.25E-18 | 32.11370396 |
| TSPAN3  | -1.377860661 | 4.20875899 | -9.615296469 | 6.90E-19 | 7.40E-18 | 32.09185978 |
| TCFL5   | -0.865222189 | 4.12230395 | -9.614549641 | 6.94E-19 | 7.44E-18 | 32.08659197 |
| APIP    | -0.581258131 | 3.77322116 | -9.612700421 | 7.03E-19 | 7.53E-18 | 32.07354917 |
| VEGFA   | -1.275965206 | 6.0652999  | -9.612689026 | 7.03E-19 | 7.53E-18 | 32.0734688  |
| DCAF4   | -0.575386952 | 3.52531083 | -9.612587938 | 7.04E-19 | 7.53E-18 | 32.07275585 |
| ATF7IP2 | -0.824503346 | 2.31056689 | -9.610175919 | 7.16E-19 | 7.66E-18 | 32.0557454  |
| COL23A1 | -1.789112294 | 4.92221047 | -9.610027147 | 7.17E-19 | 7.66E-18 | 32.05469627 |
| CANX    | -0.833041551 | 8.67494285 | -9.609469704 | 7.19E-19 | 7.68E-18 | 32.05076529 |
| SCPEP1  | -0.898216622 | 7.17199733 | -9.606437995 | 7.35E-19 | 7.85E-18 | 32.02938813 |
| NETO2   | -0.87600598  | 1.80640379 | -9.603619218 | 7.50E-19 | 8.00E-18 | 32.00951521 |
| NOSTRIN | -0.847013015 | 2.59435987 | -9.602544392 | 7.56E-19 | 8.06E-18 | 32.0019382  |
| BRMS1   | -0.498374037 | 5.83314095 | -9.601917051 | 7.59E-19 | 8.09E-18 | 31.99751594 |
| MTFP1   | -0.604394512 | 2.68488616 | -9.600494186 | 7.67E-19 | 8.17E-18 | 31.98748634 |
| GMPR2   | -0.543339095 | 6.34247017 | -9.599358085 | 7.73E-19 | 8.23E-18 | 31.9794786  |
| SNX4    | -0.788253608 | 5.6897037  | -9.595532986 | 7.95E-19 | 8.45E-18 | 31.95252089 |
| COG2    | -0.530969974 | 3.23439512 | -9.593915317 | 8.04E-19 | 8.54E-18 | 31.94112175 |
| OTUB1   | -0.483894758 | 5.92894559 | -9.593728446 | 8.05E-19 | 8.55E-18 | 31.93980499 |
| ZNF467  | -0.823619833 | 4.03703511 | -9.591086902 | 8.20E-19 | 8.71E-18 | 31.92119306 |
| JMJD4   | -0.47258999  | 3.51724888 | -9.587686682 | 8.40E-19 | 8.91E-18 | 31.89723915 |

|          |              |            |              |          |          |             |
|----------|--------------|------------|--------------|----------|----------|-------------|
| EML1     | -0.885284355 | 2.83099466 | -9.585370182 | 8.54E-19 | 9.06E-18 | 31.88092213 |
| TBX22    | -0.790023194 | 0.57828658 | -9.583438567 | 8.66E-19 | 9.18E-18 | 31.86731758 |
| SPATA2   | -0.628838631 | 4.04621226 | -9.58144952  | 8.79E-19 | 9.30E-18 | 31.85330988 |
| C6orf226 | -0.636758255 | 5.04689874 | -9.581015673 | 8.81E-19 | 9.33E-18 | 31.85025473 |
| SPINT2   | -0.796682272 | 8.68069479 | -9.580811078 | 8.83E-19 | 9.33E-18 | 31.84881399 |
| C5orf63  | -0.524319907 | 1.39170968 | -9.57848547  | 8.97E-19 | 9.48E-18 | 31.83243833 |
| GHITM    | -0.681846853 | 7.67372898 | -9.576831029 | 9.08E-19 | 9.59E-18 | 31.8207898  |
| PAX6     | -0.178199544 | 0.39818855 | -9.574389818 | 9.24E-19 | 9.75E-18 | 31.80360353 |
| MT1M     | -1.787533841 | 3.34672285 | -9.573742091 | 9.28E-19 | 9.79E-18 | 31.79904383 |
| RPUSD2   | -0.458154092 | 3.70350134 | -9.568131956 | 9.66E-19 | 1.02E-17 | 31.75955722 |
| DGAT1    | -0.553549235 | 4.87845232 | -9.567988435 | 9.67E-19 | 1.02E-17 | 31.7585472  |
| DPAGT1   | -0.536298084 | 4.34179051 | -9.566585145 | 9.77E-19 | 1.03E-17 | 31.74867199 |
| SNRPA1   | -0.515297265 | 4.05964808 | -9.565253536 | 9.86E-19 | 1.04E-17 | 31.73930185 |
| CDIP1    | -0.766363847 | 5.25845686 | -9.561453909 | 1.01E-18 | 1.07E-17 | 31.71256837 |
| CWC15    | -0.412679458 | 5.99273578 | -9.560153119 | 1.02E-18 | 1.07E-17 | 31.7034174  |
| RRP8     | -0.459992039 | 3.47315904 | -9.558253361 | 1.04E-18 | 1.09E-17 | 31.69005378 |
| JAK3     | 1.322482235  | 2.69735263 | 9.558143881  | 1.04E-18 | 1.09E-17 | 31.68928369 |
| KCNJ13   | -1.278151305 | 1.12973294 | -9.551317066 | 1.09E-18 | 1.14E-17 | 31.64127188 |
| SPATA2   | -0.701255964 | 5.98119525 | -9.550040016 | 1.10E-18 | 1.15E-17 | 31.63229241 |
| SLC46A3  | -0.866152528 | 4.11854755 | -9.548371905 | 1.11E-18 | 1.17E-17 | 31.62056407 |
| AGTR1    | -1.192159227 | 1.20217027 | -9.543627708 | 1.15E-18 | 1.20E-17 | 31.58721335 |
| FBXO36   | -0.699231957 | 2.9427851  | -9.540415445 | 1.18E-18 | 1.23E-17 | 31.56463625 |
| MUC1     | 2.171081042  | 5.02595284 | 9.538143767  | 1.20E-18 | 1.25E-17 | 31.54867214 |
| SCARB1   | -0.806939079 | 3.84541179 | -9.536995378 | 1.21E-18 | 1.26E-17 | 31.54060257 |
| TMEM12   | -0.468465496 | 5.76146703 | -9.536977224 | 1.21E-18 | 1.26E-17 | 31.54047501 |
| MYOM2    | -0.627884113 | 1.21159966 | -9.531941266 | 1.25E-18 | 1.30E-17 | 31.50509351 |
| NUCB1    | -0.514380242 | 8.1244849  | -9.531930116 | 1.25E-18 | 1.30E-17 | 31.50501519 |
| FLT4     | -1.073134418 | 3.47098276 | -9.529071503 | 1.28E-18 | 1.33E-17 | 31.48493517 |
| FBXL5    | -0.771771573 | 6.36708699 | -9.528136018 | 1.28E-18 | 1.34E-17 | 31.47836457 |
| CNDP2    | -0.685421888 | 6.16072484 | -9.523768928 | 1.32E-18 | 1.38E-17 | 31.44769536 |
| BCO2     | -0.716515998 | 1.05751408 | -9.523687677 | 1.33E-18 | 1.38E-17 | 31.44712481 |
| PKIA     | -1.165492916 | 4.47770055 | -9.522525665 | 1.34E-18 | 1.39E-17 | 31.43896538 |
| GCAT     | -0.740550283 | 4.96013816 | -9.520863112 | 1.35E-18 | 1.41E-17 | 31.42729208 |
| ATP2C2   | -1.04145477  | 1.38742577 | -9.520191225 | 1.36E-18 | 1.41E-17 | 31.42257482 |
| RAB1B    | -0.527025758 | 8.13998037 | -9.519742646 | 1.36E-18 | 1.42E-17 | 31.41942548 |
| SAE1     | -0.706344026 | 6.63861583 | -9.518338555 | 1.38E-18 | 1.43E-17 | 31.40956822 |
| TBC1D3   | -0.563243215 | 1.25840269 | -9.515490491 | 1.41E-18 | 1.46E-17 | 31.38957583 |
| CCDC17   | -0.669366173 | 1.2609168  | -9.5139054   | 1.42E-18 | 1.47E-17 | 31.37845029 |
| ERCC2    | -0.54865359  | 3.73395916 | -9.513368256 | 1.43E-18 | 1.48E-17 | 31.37468035 |
| DUT      | -0.595449356 | 5.26722723 | -9.513126701 | 1.43E-18 | 1.48E-17 | 31.37298502 |

|         |              |            |              |          |          |             |
|---------|--------------|------------|--------------|----------|----------|-------------|
| SUCLA2  | -0.758426192 | 5.12681352 | -9.51026775  | 1.46E-18 | 1.51E-17 | 31.35292144 |
| PET100  | -0.761594011 | 4.8947977  | -9.508513652 | 1.48E-18 | 1.53E-17 | 31.34061292 |
| PSMA7   | -0.536829394 | 7.56319355 | -9.508225725 | 1.48E-18 | 1.53E-17 | 31.33859264 |
| ACADM   | -0.84181326  | 4.69794118 | -9.507705048 | 1.49E-18 | 1.53E-17 | 31.33493931 |
| TMEM16  | -0.619274621 | 5.50949192 | -9.506986113 | 1.49E-18 | 1.54E-17 | 31.32989506 |
| DNAJC4  | -0.504459453 | 5.89993303 | -9.501294533 | 1.55E-18 | 1.60E-17 | 31.2899677  |
| NIT1    | -0.511624962 | 4.93007075 | -9.497486038 | 1.60E-18 | 1.65E-17 | 31.26325685 |
| SLC33A1 | -0.720139377 | 3.98666089 | -9.495233784 | 1.62E-18 | 1.67E-17 | 31.24746308 |
| PHPT1   | -0.593414438 | 7.60465671 | -9.494280681 | 1.63E-18 | 1.68E-17 | 31.24078005 |
| MLLT3   | -0.740828197 | 3.47993286 | -9.491482944 | 1.67E-18 | 1.71E-17 | 31.22116455 |
| USHBP1  | -0.741818953 | 1.98221899 | -9.488851531 | 1.70E-18 | 1.75E-17 | 31.2027177  |
| TERF2IP | -0.503685228 | 6.70375954 | -9.487293196 | 1.72E-18 | 1.76E-17 | 31.19179454 |
| KCNE2   | -0.5298055   | 1.24484074 | -9.484202253 | 1.75E-18 | 1.80E-17 | 31.17013108 |
| MACC1   | 1.370205815  | 2.37014437 | 9.480592934  | 1.80E-18 | 1.85E-17 | 31.14483875 |
| CFAP57  | -0.557400822 | 0.89761038 | -9.479774036 | 1.81E-18 | 1.86E-17 | 31.13910096 |
| KLLN    | -0.479621668 | 1.04712646 | -9.476118881 | 1.86E-18 | 1.90E-17 | 31.11349318 |
| KCTD2   | -0.691416638 | 5.13841133 | -9.475055034 | 1.87E-18 | 1.92E-17 | 31.10604082 |
| FAM114  | -0.529827415 | 3.24094148 | -9.474588559 | 1.88E-18 | 1.92E-17 | 31.10277325 |
| TTC25   | -0.634497773 | 2.64526418 | -9.470042714 | 1.94E-18 | 1.98E-17 | 31.0709344  |
| RXYLT1  | -0.532394556 | 3.08899001 | -9.469480892 | 1.95E-18 | 1.99E-17 | 31.06699994 |
| PLCD4   | -0.82709019  | 1.72026503 | -9.466843504 | 1.98E-18 | 2.03E-17 | 31.04853169 |
| STRA6   | 1.797741933  | 2.49642202 | 9.465852996  | 2.00E-18 | 2.04E-17 | 31.04159632 |
| CLNS1A  | -0.538194893 | 5.6121614  | -9.463972849 | 2.03E-18 | 2.07E-17 | 31.02843281 |
| TUSC1   | -0.709817229 | 4.47479012 | -9.461776002 | 2.06E-18 | 2.10E-17 | 31.01305355 |
| GOLGA8  | -0.835111797 | 1.56386296 | -9.461749753 | 2.06E-18 | 2.10E-17 | 31.01286981 |
| CFDP1   | -0.535317769 | 5.94026798 | -9.461147021 | 2.07E-18 | 2.10E-17 | 31.00865062 |
| MKS1    | -0.540958236 | 3.47260216 | -9.460530661 | 2.08E-18 | 2.11E-17 | 31.00433618 |
| GGPS1   | -0.451020863 | 4.99463031 | -9.457379832 | 2.12E-18 | 2.16E-17 | 30.98228286 |
| SEC11A  | -0.549111783 | 6.38169834 | -9.456761974 | 2.13E-18 | 2.17E-17 | 30.97795875 |
| BSPRY   | -0.687657392 | 6.48126911 | -9.456385616 | 2.14E-18 | 2.17E-17 | 30.97532486 |
| GEMIN8  | -0.56857545  | 4.66077004 | -9.456307992 | 2.14E-18 | 2.17E-17 | 30.97478163 |
| NPR3    | -1.621289202 | 2.32942752 | -9.454961537 | 2.16E-18 | 2.19E-17 | 30.96535909 |
| COX19   | -0.558465165 | 3.06357789 | -9.452587211 | 2.20E-18 | 2.23E-17 | 30.94874505 |
| EDN3    | -2.417428668 | 2.83666885 | -9.450427103 | 2.23E-18 | 2.26E-17 | 30.93363171 |
| RBM48   | -0.496192175 | 3.22439529 | -9.446901595 | 2.29E-18 | 2.32E-17 | 30.90896882 |
| TMEM19  | -0.630583255 | 2.34336565 | -9.444036274 | 2.33E-18 | 2.36E-17 | 30.88892756 |
| SPAG16  | -0.486395885 | 3.18017866 | -9.443655624 | 2.34E-18 | 2.37E-17 | 30.88626536 |
| SLC10A4 | -0.752852495 | 1.00061928 | -9.44363456  | 2.34E-18 | 2.37E-17 | 30.88611804 |
| SPTY2D  | -0.378953314 | 1.08226893 | -9.442731951 | 2.35E-18 | 2.38E-17 | 30.87980555 |
| C9orf43 | -0.466409363 | 0.85579645 | -9.441380785 | 2.38E-18 | 2.40E-17 | 30.87035657 |

|         |              |            |              |          |          |             |
|---------|--------------|------------|--------------|----------|----------|-------------|
| DNAJA2  | -0.480875455 | 5.55668694 | -9.440316298 | 2.39E-18 | 2.42E-17 | 30.86291286 |
| NUBP2   | -0.531209189 | 4.82753728 | -9.440201297 | 2.40E-18 | 2.42E-17 | 30.8621087  |
| FAM185A | -0.455286275 | 2.46291229 | -9.438230454 | 2.43E-18 | 2.45E-17 | 30.84832819 |
| MCCC2   | -0.767154349 | 5.61752848 | -9.436632967 | 2.46E-18 | 2.48E-17 | 30.83715927 |
| HES1    | -0.970661429 | 7.31645555 | -9.433050208 | 2.52E-18 | 2.54E-17 | 30.81211352 |
| OCEL1   | -0.642531122 | 4.98585974 | -9.431696876 | 2.55E-18 | 2.56E-17 | 30.80265407 |
| PIGQ    | -0.58261159  | 5.54624736 | -9.429066821 | 2.59E-18 | 2.61E-17 | 30.7842725  |
| TMEM92  | 1.497430344  | 1.58723301 | 9.425743639  | 2.66E-18 | 2.67E-17 | 30.76105018 |
| CAVIN2  | -1.410888492 | 5.74535749 | -9.425337424 | 2.66E-18 | 2.68E-17 | 30.75821183 |
| DUSP14  | -0.786048409 | 5.68611726 | -9.424972156 | 2.67E-18 | 2.68E-17 | 30.75565964 |
| ACTR10  | -0.531829148 | 5.60978127 | -9.424357052 | 2.68E-18 | 2.69E-17 | 30.75136191 |
| POMGN1  | -0.5009068   | 5.60127513 | -9.420650907 | 2.75E-18 | 2.76E-17 | 30.72546995 |
| CRYZL1  | -0.489628627 | 3.5077093  | -9.418269391 | 2.80E-18 | 2.81E-17 | 30.70883473 |
| EEF1AK1 | -0.651049061 | 3.68235573 | -9.416198797 | 2.84E-18 | 2.85E-17 | 30.694373   |
| TATDN2  | -0.458467334 | 4.17382721 | -9.413918339 | 2.89E-18 | 2.89E-17 | 30.67844729 |
| CIAO2A  | -0.549033572 | 6.00513096 | -9.413574818 | 2.89E-18 | 2.90E-17 | 30.67604845 |
| RIOX2   | -0.962517732 | 4.43621771 | -9.41213906  | 2.92E-18 | 2.92E-17 | 30.66602288 |
| ABHD14A | -0.798691998 | 5.80529574 | -9.40979675  | 2.97E-18 | 2.97E-17 | 30.64966866 |
| DHRS4L  | -0.606041417 | 3.72316943 | -9.409320095 | 2.98E-18 | 2.98E-17 | 30.64634085 |
| HEY1    | -0.815987995 | 3.16862719 | -9.408121421 | 3.01E-18 | 3.00E-17 | 30.63797256 |
| BCKDHB  | -0.696375287 | 3.95113973 | -9.407464529 | 3.02E-18 | 3.01E-17 | 30.63338683 |
| UBE2G2  | -0.611793359 | 4.98109398 | -9.405318633 | 3.07E-18 | 3.06E-17 | 30.61840751 |
| CDC123  | -0.456270829 | 5.93827795 | -9.404586911 | 3.08E-18 | 3.07E-17 | 30.61330014 |
| GABRB3  | -1.344609822 | 1.68537721 | -9.396381348 | 3.27E-18 | 3.25E-17 | 30.55603902 |
| RPA3    | -0.514074031 | 4.21943523 | -9.39509683  | 3.30E-18 | 3.28E-17 | 30.54707743 |
| ADGRA3  | -0.893643756 | 3.62237429 | -9.394383575 | 3.31E-18 | 3.30E-17 | 30.54210158 |
| PRR15L  | -1.34321228  | 6.33923312 | -9.393165855 | 3.34E-18 | 3.32E-17 | 30.53360686 |
| ZNF22   | -0.692425113 | 4.73803178 | -9.389460462 | 3.43E-18 | 3.41E-17 | 30.50776165 |
| PHOSPH  | -0.65156281  | 2.87077992 | -9.388215312 | 3.46E-18 | 3.44E-17 | 30.4990778  |
| CWH43   | -1.71810303  | 1.9471883  | -9.387232232 | 3.49E-18 | 3.46E-17 | 30.49222206 |
| RAB28   | -0.569857193 | 4.47692426 | -9.386683007 | 3.50E-18 | 3.47E-17 | 30.48839206 |
| TTYH2   | -1.088008681 | 3.15304556 | -9.386650181 | 3.50E-18 | 3.47E-17 | 30.48816316 |
| MOCS1   | -0.639380651 | 3.86308296 | -9.385014501 | 3.54E-18 | 3.51E-17 | 30.47675747 |
| SEM1    | -0.520486881 | 4.21490004 | -9.38426897  | 3.56E-18 | 3.52E-17 | 30.47155917 |
| ALOX15E | 2.218055805  | 4.43233389 | 9.380317733  | 3.66E-18 | 3.62E-17 | 30.44401203 |
| APTX    | -0.390200936 | 4.01311354 | -9.37821795  | 3.71E-18 | 3.67E-17 | 30.4293751  |
| EMC4    | -0.434685833 | 5.6560867  | -9.37805399  | 3.72E-18 | 3.68E-17 | 30.42823226 |
| C2orf42 | -0.532707589 | 3.25704135 | -9.375160344 | 3.80E-18 | 3.75E-17 | 30.40806435 |
| RGS14   | -0.683817361 | 4.05629804 | -9.372295368 | 3.87E-18 | 3.82E-17 | 30.38809925 |
| TMEM13  | -0.677366563 | 3.63779243 | -9.371228274 | 3.90E-18 | 3.85E-17 | 30.38066377 |

|          |              |            |              |          |          |             |
|----------|--------------|------------|--------------|----------|----------|-------------|
| SLC41A3  | -0.556795669 | 4.9230357  | -9.369892964 | 3.94E-18 | 3.89E-17 | 30.37135995 |
| RGS6     | -0.724287475 | 2.14015979 | -9.367070794 | 4.02E-18 | 3.96E-17 | 30.3516985  |
| TRPC6    | -1.008024049 | 2.7825666  | -9.366187764 | 4.04E-18 | 3.98E-17 | 30.34554722 |
| DBT      | -0.626184559 | 3.26244907 | -9.36351457  | 4.12E-18 | 4.06E-17 | 30.32692717 |
| FAM81B   | -0.75950052  | 1.30046815 | -9.363382944 | 4.12E-18 | 4.06E-17 | 30.32601041 |
| CIB1     | -0.538164976 | 8.12106436 | -9.362879397 | 4.14E-18 | 4.07E-17 | 30.32250328 |
| SNAPIN   | -0.480200857 | 6.12158222 | -9.362857924 | 4.14E-18 | 4.07E-17 | 30.32235372 |
| CCDC13   | -0.547302648 | 4.35231569 | -9.360212005 | 4.22E-18 | 4.14E-17 | 30.30392684 |
| C12orf10 | -0.521710755 | 6.04165267 | -9.35990558  | 4.23E-18 | 4.15E-17 | 30.30179298 |
| HARBI1   | -0.464025556 | 2.16662069 | -9.358280313 | 4.28E-18 | 4.19E-17 | 30.29047563 |
| ADSSL1   | -0.581422366 | 3.07977173 | -9.356600791 | 4.33E-18 | 4.24E-17 | 30.27878149 |
| SFXN2    | -0.653385217 | 2.89588626 | -9.355764872 | 4.35E-18 | 4.26E-17 | 30.27296155 |
| PPID     | -0.576808481 | 4.87342551 | -9.354914969 | 4.38E-18 | 4.29E-17 | 30.26704451 |
| TMEM13   | -0.411784495 | 3.42052054 | -9.351979175 | 4.47E-18 | 4.38E-17 | 30.24660748 |
| COL8A2   | 1.888704653  | 5.22140584 | 9.349148019  | 4.56E-18 | 4.46E-17 | 30.22690184 |
| SPOP     | -0.475265833 | 5.07928274 | -9.348911399 | 4.57E-18 | 4.47E-17 | 30.22525503 |
| BMP8A    | -2.141960091 | 2.34674658 | -9.348830333 | 4.57E-18 | 4.47E-17 | 30.22469083 |
| DPH5     | -0.49001494  | 4.55658505 | -9.347872328 | 4.60E-18 | 4.49E-17 | 30.21802362 |
| COLEC1   | -0.765259935 | 0.94916135 | -9.345834735 | 4.67E-18 | 4.56E-17 | 30.20384415 |
| DCSTAM   | 3.49909712   | 4.34613684 | 9.345368398  | 4.68E-18 | 4.57E-17 | 30.20059916 |
| TSG101   | -0.480105187 | 5.82537319 | -9.344639456 | 4.71E-18 | 4.59E-17 | 30.19552699 |
| PLEK2    | -0.636773151 | 6.10246542 | -9.344196104 | 4.72E-18 | 4.60E-17 | 30.19244213 |
| FAM241   | -0.640146091 | 2.28271412 | -9.344170957 | 4.72E-18 | 4.60E-17 | 30.19226715 |
| ENKUR    | -0.45099585  | 0.55702623 | -9.343483919 | 4.75E-18 | 4.62E-17 | 30.18748685 |
| GGT7     | -0.739859069 | 5.11982409 | -9.343337731 | 4.75E-18 | 4.62E-17 | 30.18646973 |
| NWD1     | -0.772032581 | 0.69880575 | -9.342859184 | 4.77E-18 | 4.63E-17 | 30.1831402  |
| RTRAF    | -0.423495105 | 5.50622158 | -9.337615699 | 4.95E-18 | 4.81E-17 | 30.14666377 |
| TCEAL8   | -0.538545368 | 7.15310104 | -9.337211837 | 4.96E-18 | 4.82E-17 | 30.14385471 |
| TXNDC1   | -0.535484182 | 4.53671036 | -9.336423229 | 4.99E-18 | 4.84E-17 | 30.13836973 |
| TMEM20   | -0.481856108 | 6.36734802 | -9.332130823 | 5.14E-18 | 4.99E-17 | 30.10851883 |
| COL9A3   | -2.735534047 | 2.96120788 | -9.327799807 | 5.30E-18 | 5.14E-17 | 30.07840625 |
| SNRPB2   | -0.409735261 | 5.8433921  | -9.325335352 | 5.39E-18 | 5.22E-17 | 30.0612745  |
| MLH1     | -0.582679052 | 5.0607139  | -9.323058278 | 5.48E-18 | 5.31E-17 | 30.04544731 |
| IL17RC   | -0.568519771 | 5.07506897 | -9.319495818 | 5.62E-18 | 5.44E-17 | 30.02068964 |
| UPF3B    | -0.548196295 | 4.08395759 | -9.318171043 | 5.67E-18 | 5.49E-17 | 30.01148416 |
| TUBB3    | 0.762233099  | 0.87101727 | 9.317790837  | 5.69E-18 | 5.50E-17 | 30.00884234 |
| OS9      | -0.707097096 | 7.43686254 | -9.317085964 | 5.72E-18 | 5.52E-17 | 30.00394475 |
| VRK3     | -0.521330472 | 3.42828232 | -9.314934612 | 5.80E-18 | 5.60E-17 | 29.98899786 |
| SFTPD    | -0.903444888 | 4.22767065 | -9.313182316 | 5.87E-18 | 5.67E-17 | 29.97682473 |
| SDHAF4   | -0.491514973 | 4.66679745 | -9.311748285 | 5.93E-18 | 5.72E-17 | 29.96686342 |



|         |              |            |              |          |          |             |
|---------|--------------|------------|--------------|----------|----------|-------------|
| HIST1H2 | -1.129371082 | 6.73314912 | -9.310280802 | 6.00E-18 | 5.78E-17 | 29.95667051 |
| HSPA1L  | -0.663039717 | 2.75111874 | -9.309217961 | 6.04E-18 | 5.82E-17 | 29.94928867 |
| TRAPPC  | -0.468658241 | 4.82128105 | -9.302883307 | 6.32E-18 | 6.08E-17 | 29.90530071 |
| TMEM12  | -0.693259845 | 5.94605418 | -9.300781295 | 6.41E-18 | 6.17E-17 | 29.89070756 |
| B4GAT1  | -0.630313516 | 6.11288822 | -9.299775072 | 6.46E-18 | 6.21E-17 | 29.88372246 |
| FOXJ1   | -1.456953285 | 1.5783657  | -9.299084493 | 6.49E-18 | 6.23E-17 | 29.87892874 |
| TM2D3   | -0.519726219 | 3.88738516 | -9.298103966 | 6.53E-18 | 6.27E-17 | 29.87212262 |
| FAM162F | -1.015588783 | 2.20739482 | -9.297769461 | 6.55E-18 | 6.28E-17 | 29.86980082 |
| NFE2    | -0.846553127 | 1.68430113 | -9.29739779  | 6.56E-18 | 6.30E-17 | 29.86722108 |
| DNAAF1  | -0.783767846 | 0.98335515 | -9.292977362 | 6.77E-18 | 6.49E-17 | 29.83654319 |
| DNASE2  | -0.528236516 | 6.91575606 | -9.289665439 | 6.93E-18 | 6.64E-17 | 29.81356306 |
| GALM    | -0.489188396 | 5.45447568 | -9.289487282 | 6.94E-18 | 6.65E-17 | 29.81232702 |
| RNF135  | -0.45474418  | 4.75347606 | -9.288867795 | 6.97E-18 | 6.67E-17 | 29.80802913 |
| IRS1    | -1.231298529 | 4.32987278 | -9.280026528 | 7.42E-18 | 7.10E-17 | 29.74670548 |
| C1orf50 | -0.423905825 | 3.76641333 | -9.278708207 | 7.49E-18 | 7.16E-17 | 29.73756399 |
| PIH1D1  | -0.530844724 | 5.72589647 | -9.275605075 | 7.65E-18 | 7.31E-17 | 29.7160488  |
| C1QTNF  | -0.359218999 | 0.41206792 | -9.275460904 | 7.66E-18 | 7.31E-17 | 29.71504929 |
| TBPL1   | -0.469842782 | 2.9294955  | -9.272635201 | 7.81E-18 | 7.46E-17 | 29.69546087 |
| MRPS35  | -0.559384817 | 6.27248659 | -9.272294254 | 7.83E-18 | 7.47E-17 | 29.69309754 |
| COMTD1  | -0.822870022 | 4.33349669 | -9.270871042 | 7.91E-18 | 7.54E-17 | 29.68323281 |
| ROGDI   | -0.582501196 | 3.80761587 | -9.270620062 | 7.92E-18 | 7.55E-17 | 29.68149326 |
| DNAJC8  | -0.462795392 | 6.81567554 | -9.270068416 | 7.95E-18 | 7.58E-17 | 29.67766988 |
| CA2     | -1.303859239 | 3.92036097 | -9.267631742 | 8.09E-18 | 7.70E-17 | 29.66078298 |
| METTL2  | -0.473827077 | 2.66937452 | -9.26560494  | 8.21E-18 | 7.81E-17 | 29.6467383  |
| IQCC    | -0.627270037 | 3.41205685 | -9.265286413 | 8.23E-18 | 7.82E-17 | 29.64453121 |
| CLPTM1  | -0.573408956 | 6.30130348 | -9.2651239   | 8.24E-18 | 7.83E-17 | 29.64340516 |
| MSRA    | -0.44757634  | 3.94227417 | -9.264302377 | 8.28E-18 | 7.87E-17 | 29.63771302 |
| C2orf73 | -0.477987806 | 0.69973492 | -9.263828191 | 8.31E-18 | 7.89E-17 | 29.6344276  |
| COPS7A  | -0.483728641 | 6.35107153 | -9.262701481 | 8.38E-18 | 7.95E-17 | 29.62662148 |
| PIN1    | -0.496337655 | 4.6748552  | -9.25899242  | 8.60E-18 | 8.15E-17 | 29.60092755 |
| PEX12   | -0.669468167 | 3.83481028 | -9.258188368 | 8.65E-18 | 8.19E-17 | 29.59535828 |
| RGS8    | -1.52424957  | 1.04604495 | -9.258098551 | 8.65E-18 | 8.19E-17 | 29.59473618 |
| PDE8B   | -1.447266584 | 6.39004694 | -9.255251865 | 8.83E-18 | 8.35E-17 | 29.57502061 |
| DHRX    | -0.530671203 | 4.59454941 | -9.254216511 | 8.89E-18 | 8.41E-17 | 29.56785071 |
| MARVEL  | -0.819057369 | 5.16896269 | -9.251284044 | 9.07E-18 | 8.58E-17 | 29.54754532 |
| ZC4H2   | -0.688747571 | 2.67133446 | -9.251189751 | 9.08E-18 | 8.58E-17 | 29.54689246 |
| RBX1    | -0.546120764 | 5.68736925 | -9.250908547 | 9.10E-18 | 8.59E-17 | 29.54494548 |
| SPTBN2  | 1.218205751  | 2.34102912 | 9.248499632  | 9.25E-18 | 8.73E-17 | 29.52826806 |
| PRKN    | -0.500618833 | 1.62533708 | -9.248000733 | 9.29E-18 | 8.76E-17 | 29.52481436 |
| FAM220  | -0.543813109 | 4.51935754 | -9.247841642 | 9.30E-18 | 8.76E-17 | 29.52371304 |

|        |              |            |              |          |          |             |
|--------|--------------|------------|--------------|----------|----------|-------------|
| HM13   | -0.530606136 | 5.71369769 | -9.243018439 | 9.62E-18 | 9.06E-17 | 29.49032868 |
| SELENO | -1.630507    | 1.79033603 | -9.239761627 | 9.84E-18 | 9.27E-17 | 29.46779117 |
| PTPA   | -0.5044351   | 6.62790114 | -9.23907638  | 9.89E-18 | 9.30E-17 | 29.4630497  |
| PPP2CA | -0.4746939   | 6.27456217 | -9.235035942 | 1.02E-17 | 9.57E-17 | 29.43509593 |
| CTH    | -0.786297662 | 2.4909768  | -9.234517644 | 1.02E-17 | 9.60E-17 | 29.43151053 |
| DMAC2L | -0.459954806 | 3.23038685 | -9.227564824 | 1.07E-17 | 1.01E-16 | 29.38342305 |
| IDH3G  | -0.378394681 | 6.06721304 | -9.22575915  | 1.09E-17 | 1.02E-16 | 29.37093751 |
| RABEP2 | -0.458415609 | 4.58126477 | -9.224978582 | 1.09E-17 | 1.02E-16 | 29.36554055 |
| FGGY   | -0.482218019 | 2.49246976 | -9.222694535 | 1.11E-17 | 1.04E-16 | 29.34974965 |
| RING1  | -0.518292805 | 7.06169357 | -9.222494458 | 1.11E-17 | 1.04E-16 | 29.3483665  |
| TEKT4  | -0.822274272 | 0.74476383 | -9.220995238 | 1.12E-17 | 1.05E-16 | 29.33800271 |
| KLHL8  | -0.826172081 | 3.79089408 | -9.217059452 | 1.15E-17 | 1.08E-16 | 29.31079949 |
| PGK1   | -0.766161053 | 6.98902752 | -9.214408324 | 1.18E-17 | 1.10E-16 | 29.29247879 |
| SHANK2 | -0.895831422 | 1.7863554  | -9.209981681 | 1.21E-17 | 1.13E-16 | 29.26189419 |
| NME1   | -0.511713763 | 4.79616894 | -9.207593402 | 1.23E-17 | 1.15E-16 | 29.24539613 |
| PTPRR  | -0.59688859  | 1.06811246 | -9.206890016 | 1.24E-17 | 1.16E-16 | 29.2405376  |
| AKT2   | -0.820343241 | 5.83581173 | -9.206656142 | 1.24E-17 | 1.16E-16 | 29.23892219 |
| NABP2  | -0.407300927 | 5.61550714 | -9.205740572 | 1.25E-17 | 1.17E-16 | 29.23259839 |
| ROBO4  | -0.993007548 | 4.06733674 | -9.203266061 | 1.27E-17 | 1.19E-16 | 29.21550862 |
| SLCO2A | -1.148813178 | 5.98191145 | -9.202707956 | 1.28E-17 | 1.19E-16 | 29.21165449 |
| TMED1  | -0.699029936 | 5.28079138 | -9.201466107 | 1.29E-17 | 1.20E-16 | 29.203079   |
| LINGO2 | -1.103976877 | 0.89281026 | -9.19407893  | 1.35E-17 | 1.26E-16 | 29.15207947 |
| LSM2   | -0.52139649  | 6.31502823 | -9.192979931 | 1.37E-17 | 1.27E-16 | 29.14449396 |
| HIRIP3 | -0.495682269 | 4.52776669 | -9.185957539 | 1.43E-17 | 1.33E-16 | 29.09603476 |
| STARD3 | -0.590119308 | 4.8391109  | -9.184842058 | 1.45E-17 | 1.34E-16 | 29.08833891 |
| HCCS   | -0.505872842 | 4.55773176 | -9.184217743 | 1.45E-17 | 1.35E-16 | 29.08403187 |
| PDCD5  | -0.446712782 | 5.49621756 | -9.180831012 | 1.49E-17 | 1.38E-16 | 29.06067003 |
| RABAC1 | -0.642721541 | 6.67615722 | -9.179459182 | 1.50E-17 | 1.39E-16 | 29.05120831 |
| CLUL1  | -0.877287407 | 1.57448297 | -9.178167528 | 1.51E-17 | 1.40E-16 | 29.04230022 |
| LRRC27 | -0.465075821 | 2.46452622 | -9.175706991 | 1.54E-17 | 1.43E-16 | 29.0253325  |
| AGBL5  | -0.528562876 | 4.73646788 | -9.17355239  | 1.56E-17 | 1.45E-16 | 29.01047638 |
| THAP1  | -0.543327838 | 3.90394782 | -9.170131668 | 1.60E-17 | 1.48E-16 | 28.98689386 |
| PAK1   | -0.719166983 | 5.53141288 | -9.168315858 | 1.62E-17 | 1.50E-16 | 28.97437743 |
| RAB2A  | -0.491787407 | 6.45366881 | -9.166571225 | 1.64E-17 | 1.52E-16 | 28.9623528  |
| WDR72  | -1.402425438 | 3.7282771  | -9.16546878  | 1.65E-17 | 1.53E-16 | 28.95475496 |
| CEP19  | -0.571323988 | 2.42395834 | -9.165436009 | 1.65E-17 | 1.53E-16 | 28.95452911 |
| INPP5J | -1.267424343 | 7.33929594 | -9.164766568 | 1.66E-17 | 1.54E-16 | 28.94991569 |
| NMRAL1 | -0.468583696 | 4.97767291 | -9.16421649  | 1.67E-17 | 1.54E-16 | 28.94612496 |
| ZNHIT1 | -0.63511284  | 5.62047056 | -9.162192687 | 1.69E-17 | 1.56E-16 | 28.93217945 |
| ANAPC1 | -0.463000784 | 3.30799533 | -9.161826546 | 1.70E-17 | 1.57E-16 | 28.92965663 |

|        |              |            |              |          |          |             |
|--------|--------------|------------|--------------|----------|----------|-------------|
| ALKBH5 | -0.505625699 | 6.74705387 | -9.161366135 | 1.70E-17 | 1.57E-16 | 28.92648433 |
| CCNJL  | -0.66966722  | 3.06256232 | -9.160662362 | 1.71E-17 | 1.58E-16 | 28.92163539 |
| AARS   | -0.731188824 | 6.86042483 | -9.160555292 | 1.71E-17 | 1.58E-16 | 28.9208977  |
| SPG21  | -0.485277263 | 6.3542664  | -9.156521218 | 1.76E-17 | 1.62E-16 | 28.89310705 |
| ZNF480 | -0.496100434 | 3.18936956 | -9.156271909 | 1.76E-17 | 1.62E-16 | 28.89138977 |
| YWHAE  | -0.416108619 | 8.83458606 | -9.153926067 | 1.79E-17 | 1.65E-16 | 28.87523236 |
| KBTBD3 | -0.440665459 | 2.27759117 | -9.152439267 | 1.81E-17 | 1.66E-16 | 28.86499285 |
| FAM86C | -0.453558477 | 3.34958157 | -9.150872882 | 1.83E-17 | 1.68E-16 | 28.85420614 |
| UGT8   | -1.183006916 | 2.2544117  | -9.141951366 | 1.95E-17 | 1.79E-16 | 28.79278707 |
| KBTBD7 | -0.657311589 | 3.33373591 | -9.141825573 | 1.95E-17 | 1.79E-16 | 28.79192128 |
| EIF2B5 | -0.435578095 | 4.63435584 | -9.140807418 | 1.97E-17 | 1.80E-16 | 28.78491389 |
| ALKBH7 | -0.677396046 | 6.67114461 | -9.140490896 | 1.97E-17 | 1.80E-16 | 28.78273553 |
| TXNDC1 | -0.47651862  | 5.73987584 | -9.137373463 | 2.01E-17 | 1.84E-16 | 28.76128282 |
| HPCAL1 | -0.728186827 | 4.75864917 | -9.137199534 | 2.02E-17 | 1.84E-16 | 28.76008602 |
| SUMF1  | -0.540612117 | 4.78043241 | -9.137177071 | 2.02E-17 | 1.84E-16 | 28.75993146 |
| EID2B  | -0.578103977 | 3.14362519 | -9.13692181  | 2.02E-17 | 1.85E-16 | 28.75817506 |
| COX11  | -0.555522343 | 4.22905364 | -9.136790023 | 2.02E-17 | 1.85E-16 | 28.75726827 |
| ZNF30  | -0.486832412 | 2.30031035 | -9.135264512 | 2.04E-17 | 1.87E-16 | 28.7467721  |
| PLEKHN | 1.160616396  | 2.78168882 | 9.133852714  | 2.06E-17 | 1.88E-16 | 28.73705912 |
| RHBDD3 | -0.584226664 | 4.39257929 | -9.133212198 | 2.07E-17 | 1.89E-16 | 28.73265271 |
| SMTN   | -0.835226892 | 3.14123347 | -9.133190053 | 2.07E-17 | 1.89E-16 | 28.73250036 |
| CGRRF1 | -0.5277856   | 3.50152492 | -9.131440295 | 2.10E-17 | 1.91E-16 | 28.72046376 |
| MRM2   | -0.460403715 | 5.04513739 | -9.130899629 | 2.11E-17 | 1.92E-16 | 28.71674475 |
| SFTPC  | -0.969710702 | 0.93803859 | -9.119130033 | 2.29E-17 | 2.08E-16 | 28.63581438 |
| RAB4A  | -0.598721753 | 5.48202978 | -9.118872792 | 2.29E-17 | 2.08E-16 | 28.63404612 |
| GALNT1 | -1.066812716 | 5.59254712 | -9.116903837 | 2.32E-17 | 2.11E-16 | 28.62051251 |
| KHDRBS | -1.428878971 | 2.05419109 | -9.116091967 | 2.33E-17 | 2.12E-16 | 28.61493255 |
| PBX4   | -0.972909885 | 2.61676565 | -9.116014998 | 2.34E-17 | 2.12E-16 | 28.61440356 |
| LY6G5C | -0.515735658 | 1.70581033 | -9.115919179 | 2.34E-17 | 2.12E-16 | 28.61374502 |
| CHI3L1 | 3.094484769  | 5.85748835 | 9.112419931  | 2.39E-17 | 2.17E-16 | 28.58969791 |
| STK40  | -0.70249005  | 5.14807658 | -9.108310485 | 2.46E-17 | 2.24E-16 | 28.56146347 |
| RWDD2  | -0.521725311 | 3.04618968 | -9.107966751 | 2.47E-17 | 2.24E-16 | 28.5591021  |
| POLR3H | -0.558261916 | 4.420784   | -9.107604043 | 2.48E-17 | 2.24E-16 | 28.55661043 |
| ASB9   | -0.660281121 | 2.33981028 | -9.105467255 | 2.51E-17 | 2.28E-16 | 28.5419325  |
| RPL17  | -0.625734683 | 5.61253536 | -9.105254651 | 2.52E-17 | 2.28E-16 | 28.54047219 |
| MZT2A  | -0.807881342 | 5.0198909  | -9.102969809 | 2.56E-17 | 2.31E-16 | 28.52477939 |
| SPATA4 | -0.353085671 | 0.46479222 | -9.10079421  | 2.60E-17 | 2.35E-16 | 28.50983875 |
| ANKMY2 | -0.658454538 | 4.92999308 | -9.098327877 | 2.64E-17 | 2.39E-16 | 28.49290373 |
| ASPRV1 | -0.497366744 | 1.27242399 | -9.09420597  | 2.72E-17 | 2.46E-16 | 28.46460597 |
| ARF1   | -0.424728563 | 8.86919857 | -9.08802289  | 2.84E-17 | 2.56E-16 | 28.42217007 |

|          |              |            |              |          |          |             |
|----------|--------------|------------|--------------|----------|----------|-------------|
| MTIF2    | -0.465618058 | 4.77871517 | -9.085921757 | 2.88E-17 | 2.60E-16 | 28.40775285 |
| GPIHBP1  | -1.008442839 | 2.19718594 | -9.083975447 | 2.92E-17 | 2.63E-16 | 28.3943995  |
| ZNF330   | -0.582223361 | 5.47075602 | -9.083504632 | 2.93E-17 | 2.64E-16 | 28.39116953 |
| GPKOW    | -0.541197589 | 5.46738133 | -9.080852406 | 2.98E-17 | 2.69E-16 | 28.37297581 |
| CYP27B1  | -0.964713078 | 2.44597295 | -9.074388808 | 3.12E-17 | 2.81E-16 | 28.32864826 |
| THRA     | -0.561507426 | 4.96531656 | -9.072877091 | 3.15E-17 | 2.84E-16 | 28.31828318 |
| CBY1     | -0.520117507 | 5.26521977 | -9.072017253 | 3.17E-17 | 2.85E-16 | 28.3123881  |
| TCTEX1L  | -0.540377605 | 3.72354193 | -9.066601786 | 3.29E-17 | 2.96E-16 | 28.27526604 |
| ECHDC3   | -0.784684582 | 4.72157451 | -9.065499166 | 3.32E-17 | 2.98E-16 | 28.26770916 |
| NEXMIF   | -0.373689198 | 0.40516616 | -9.064225221 | 3.35E-17 | 3.01E-16 | 28.25897869 |
| WDCP     | -0.505541787 | 2.51302032 | -9.062673583 | 3.38E-17 | 3.04E-16 | 28.248346   |
| TMEM60   | -0.426794068 | 5.77685165 | -9.061627572 | 3.41E-17 | 3.06E-16 | 28.24117868 |
| C17orf80 | -0.563022007 | 4.09818775 | -9.059865497 | 3.45E-17 | 3.09E-16 | 28.2291058  |
| CWC27    | -0.489184032 | 4.16894178 | -9.058113517 | 3.49E-17 | 3.13E-16 | 28.21710328 |
| FOPNL    | -0.557981819 | 5.57884148 | -9.057973323 | 3.50E-17 | 3.13E-16 | 28.21614289 |
| PARD6A   | -0.648510916 | 2.73768988 | -9.057233809 | 3.51E-17 | 3.15E-16 | 28.211077   |
| PHF5A    | -0.518551776 | 5.43845484 | -9.056912542 | 3.52E-17 | 3.15E-16 | 28.2088763  |
| NQO2     | -0.44265351  | 2.97430617 | -9.056582804 | 3.53E-17 | 3.16E-16 | 28.2066176  |
| WBP1     | -0.717638375 | 4.71254615 | -9.054840612 | 3.57E-17 | 3.19E-16 | 28.19468436 |
| SMIM12   | -0.462853631 | 3.75437404 | -9.054495564 | 3.58E-17 | 3.20E-16 | 28.19232107 |
| PSMB4    | -0.429935436 | 8.01854213 | -9.053870672 | 3.60E-17 | 3.21E-16 | 28.1880412  |
| DCTD     | -0.623600147 | 6.70789076 | -9.053527673 | 3.61E-17 | 3.22E-16 | 28.18569208 |
| PET117   | -0.41540086  | 3.63632891 | -9.052910123 | 3.62E-17 | 3.23E-16 | 28.18146273 |
| GAS8     | -0.515759    | 4.44286366 | -9.052757167 | 3.63E-17 | 3.23E-16 | 28.18041522 |
| BEGAIN   | -0.3348974   | 0.43238864 | -9.05098639  | 3.67E-17 | 3.27E-16 | 28.16828882 |
| SLC26A4  | -2.301169321 | 5.79010767 | -9.050935257 | 3.67E-17 | 3.27E-16 | 28.16793867 |
| MTERF1   | -0.425343309 | 2.58284155 | -9.050581486 | 3.68E-17 | 3.28E-16 | 28.16551617 |
| PSMD3    | -0.460579555 | 5.90821256 | -9.050483242 | 3.68E-17 | 3.28E-16 | 28.16484345 |
| KYAT1    | -0.537084603 | 3.14034055 | -9.050365659 | 3.69E-17 | 3.28E-16 | 28.16403829 |
| MT1H     | -3.205596739 | 4.09908665 | -9.049564841 | 3.71E-17 | 3.29E-16 | 28.15855482 |
| DENND6   | -0.679863378 | 4.01131812 | -9.046342298 | 3.79E-17 | 3.37E-16 | 28.13649152 |
| CDC25A   | -0.599243436 | 1.75417147 | -9.045695325 | 3.81E-17 | 3.38E-16 | 28.13206248 |
| ZNF433   | -0.50737086  | 3.01684209 | -9.045552865 | 3.81E-17 | 3.38E-16 | 28.13108725 |
| LRP2     | -1.579383897 | 4.10232514 | -9.044811392 | 3.83E-17 | 3.40E-16 | 28.12601151 |
| APOA1    | -1.610998113 | 1.88667323 | -9.042239304 | 3.90E-17 | 3.46E-16 | 28.10840601 |
| MAP6     | -0.745704867 | 2.52974921 | -9.0400957   | 3.96E-17 | 3.51E-16 | 28.09373537 |
| ACOT8    | -0.431868385 | 4.03121522 | -9.039828992 | 3.97E-17 | 3.51E-16 | 28.09191017 |
| PPP1CC   | -0.462590512 | 5.32768874 | -9.039645466 | 3.97E-17 | 3.51E-16 | 28.09065423 |
| TRIM16   | -0.768168874 | 2.74503109 | -9.039387712 | 3.98E-17 | 3.52E-16 | 28.08889035 |
| QRFPR    | -0.922348703 | 1.17029594 | -9.039247081 | 3.98E-17 | 3.52E-16 | 28.08792799 |

|        |              |            |              |          |          |             |
|--------|--------------|------------|--------------|----------|----------|-------------|
| PNMA8A | -1.083600642 | 5.00142092 | -9.039166081 | 3.98E-17 | 3.52E-16 | 28.0873737  |
| THOC7  | -0.397119013 | 5.71801304 | -9.037624862 | 4.03E-17 | 3.56E-16 | 28.07682739 |
| HSDL1  | -0.595166673 | 4.69872144 | -9.035470433 | 4.09E-17 | 3.61E-16 | 28.06208653 |
| STUB1  | -0.59920766  | 6.14278759 | -9.035258756 | 4.09E-17 | 3.61E-16 | 28.06063831 |
| MRPL42 | -0.40476149  | 3.09922176 | -9.033284163 | 4.15E-17 | 3.66E-16 | 28.04712967 |
| CD24   | -0.860424425 | 10.2376986 | -9.027542488 | 4.32E-17 | 3.81E-16 | 28.00785818 |
| TRMT61 | -0.541111313 | 4.78394128 | -9.026000587 | 4.37E-17 | 3.84E-16 | 27.99731418 |
| ABLIM2 | -0.750657306 | 3.32537884 | -9.024445797 | 4.41E-17 | 3.88E-16 | 27.98668299 |
| TTLL1  | -0.557579142 | 4.1032741  | -9.019927673 | 4.55E-17 | 4.01E-16 | 27.95579476 |
| SGK1   | -1.108866687 | 4.38531775 | -9.0189375   | 4.58E-17 | 4.03E-16 | 27.94902648 |
| LRRC8D | -0.637809369 | 4.15411595 | -9.018392824 | 4.60E-17 | 4.04E-16 | 27.94530354 |
| CUTA   | -0.511936859 | 8.18620714 | -9.016736366 | 4.65E-17 | 4.09E-16 | 27.93398213 |
| AHCY   | -0.58307976  | 7.24593825 | -9.011751538 | 4.82E-17 | 4.23E-16 | 27.89991874 |
| TXNL4B | -0.512308684 | 3.21129398 | -9.009035249 | 4.91E-17 | 4.31E-16 | 27.8813613  |
| ZNF511 | -0.545133538 | 3.81355443 | -9.007877102 | 4.95E-17 | 4.34E-16 | 27.87344982 |
| SVBP   | -0.515957461 | 5.18666875 | -9.005945721 | 5.02E-17 | 4.40E-16 | 27.86025744 |
| FBXL2  | -0.623754401 | 3.21766068 | -9.003724092 | 5.09E-17 | 4.46E-16 | 27.8450843  |
| WASF3  | -1.052845191 | 3.67121893 | -9.003295204 | 5.11E-17 | 4.47E-16 | 27.84215534 |
| VLDLR  | -1.058439767 | 3.15161053 | -9.001336003 | 5.18E-17 | 4.53E-16 | 27.82877645 |
| MAGOHE | -0.368891857 | 2.91269236 | -8.996945609 | 5.34E-17 | 4.67E-16 | 27.79880104 |
| LRGUK  | -0.385302831 | 0.48337585 | -8.996680922 | 5.35E-17 | 4.68E-16 | 27.79699414 |
| CAAP1  | -0.610707902 | 5.04646551 | -8.995130828 | 5.41E-17 | 4.72E-16 | 27.78641284 |
| PSMD8  | -0.468498374 | 6.98637003 | -8.993888804 | 5.45E-17 | 4.76E-16 | 27.77793518 |
| SEC13  | -0.466863546 | 5.92809354 | -8.993736769 | 5.46E-17 | 4.76E-16 | 27.77689748 |
| CCNQ   | -0.44936883  | 5.17076286 | -8.993578003 | 5.46E-17 | 4.77E-16 | 27.77581384 |
| ZCCHC3 | -0.556784637 | 4.96007911 | -8.993417744 | 5.47E-17 | 4.77E-16 | 27.77472003 |
| PHB2   | -0.44779471  | 7.63274883 | -8.99255364  | 5.50E-17 | 4.80E-16 | 27.76882245 |
| MED31  | -0.44872456  | 3.44339039 | -8.991787268 | 5.53E-17 | 4.82E-16 | 27.76359214 |
| KCNJ8  | -0.94029964  | 3.3628738  | -8.989425092 | 5.62E-17 | 4.90E-16 | 27.7474723  |
| EIF4E  | -0.472332335 | 3.02996277 | -8.988753982 | 5.65E-17 | 4.92E-16 | 27.74289294 |
| HDAC3  | -0.553393208 | 4.95140715 | -8.986618671 | 5.73E-17 | 4.99E-16 | 27.72832372 |
| DNASE1 | -1.257337021 | 2.61096384 | -8.985944656 | 5.76E-17 | 5.01E-16 | 27.72372529 |
| SCN4B  | -1.177647377 | 3.11795484 | -8.983887703 | 5.84E-17 | 5.08E-16 | 27.70969294 |
| RAVER2 | -0.582552006 | 2.78165491 | -8.983552164 | 5.86E-17 | 5.09E-16 | 27.70740408 |
| NLK    | -0.554780898 | 4.37199773 | -8.983197214 | 5.87E-17 | 5.10E-16 | 27.70498286 |
| MRPS12 | -0.480065907 | 4.81610122 | -8.980393423 | 5.99E-17 | 5.19E-16 | 27.68585909 |
| SPINK5 | -1.031320454 | 1.19588687 | -8.977531984 | 6.10E-17 | 5.29E-16 | 27.66634532 |
| NAGS   | -0.884712139 | 4.02599262 | -8.975236821 | 6.20E-17 | 5.38E-16 | 27.65069563 |
| ASTE1  | -0.555841208 | 3.27953113 | -8.973236115 | 6.29E-17 | 5.45E-16 | 27.63705541 |
| ACTR5  | -0.431768209 | 3.2911405  | -8.971625948 | 6.36E-17 | 5.51E-16 | 27.62607892 |

|         |              |            |              |          |          |             |
|---------|--------------|------------|--------------|----------|----------|-------------|
| GPR160  | -0.793579237 | 2.50039947 | -8.970952919 | 6.39E-17 | 5.53E-16 | 27.62149119 |
| ELP3    | -0.500612019 | 4.39726393 | -8.970622208 | 6.40E-17 | 5.54E-16 | 27.61923695 |
| EBPL    | -0.626916356 | 5.20796139 | -8.970190533 | 6.42E-17 | 5.55E-16 | 27.61629457 |
| LXN     | -0.567069653 | 4.64850379 | -8.967429424 | 6.55E-17 | 5.66E-16 | 27.59747605 |
| PRR13   | -0.451620198 | 6.42006734 | -8.967013424 | 6.56E-17 | 5.67E-16 | 27.59464104 |
| HIST1H2 | -0.975591702 | 6.89495443 | -8.962526443 | 6.77E-17 | 5.84E-16 | 27.56406691 |
| FBXL17  | -0.641575967 | 4.19089411 | -8.961689643 | 6.81E-17 | 5.88E-16 | 27.55836586 |
| CFAP41C | -0.547962836 | 4.27388064 | -8.958939973 | 6.94E-17 | 5.99E-16 | 27.53963454 |
| DGKI    | -1.382317795 | 1.99746597 | -8.957872875 | 6.99E-17 | 6.03E-16 | 27.53236606 |
| AKR1E2  | -0.619281119 | 0.97907652 | -8.956941563 | 7.04E-17 | 6.06E-16 | 27.52602284 |
| NUDT18  | -0.607626551 | 4.35555655 | -8.955062516 | 7.13E-17 | 6.14E-16 | 27.51322559 |
| MARK3   | -0.47992583  | 4.53404869 | -8.952790939 | 7.24E-17 | 6.23E-16 | 27.49775688 |
| TIMM50  | -0.378383547 | 4.9500624  | -8.95107025  | 7.33E-17 | 6.30E-16 | 27.48604091 |
| RAG1    | -0.823161359 | 0.86758165 | -8.949542109 | 7.41E-17 | 6.36E-16 | 27.47563696 |
| PCBD2   | -0.464790031 | 2.55273968 | -8.949531081 | 7.41E-17 | 6.36E-16 | 27.47556188 |
| CD2BP2  | -0.557347339 | 6.40719572 | -8.949083593 | 7.43E-17 | 6.38E-16 | 27.47251545 |
| PPT2    | -0.549586216 | 2.74584166 | -8.942213251 | 7.79E-17 | 6.69E-16 | 27.42575318 |
| TMEM26  | -0.720978043 | 4.30713574 | -8.940149239 | 7.90E-17 | 6.78E-16 | 27.41170836 |
| PAIP2   | -0.638650984 | 5.58118205 | -8.938242556 | 8.01E-17 | 6.87E-16 | 27.39873561 |
| PLEKHB  | -0.981040327 | 4.97275785 | -8.936172045 | 8.12E-17 | 6.96E-16 | 27.38464983 |
| TMEM19  | -0.552673171 | 3.58849734 | -8.933917034 | 8.25E-17 | 7.07E-16 | 27.36931084 |
| PEG3    | -0.932821362 | 2.13478548 | -8.933474599 | 8.27E-17 | 7.08E-16 | 27.36630155 |
| UBXN6   | -0.502061648 | 7.1004416  | -8.93294171  | 8.31E-17 | 7.11E-16 | 27.36267713 |
| OAT     | -0.714162085 | 5.85745342 | -8.931661259 | 8.38E-17 | 7.17E-16 | 27.35396867 |
| ID3     | -1.128218985 | 7.69907463 | -8.931308668 | 8.40E-17 | 7.18E-16 | 27.35157078 |
| PLAAT1  | -0.929239149 | 3.09025952 | -8.930599152 | 8.44E-17 | 7.21E-16 | 27.34674567 |
| PTPRE   | 1.416956001  | 3.59362581 | 8.930583572  | 8.44E-17 | 7.21E-16 | 27.34663972 |
| BET1    | -0.465613373 | 3.67599529 | -8.929053806 | 8.53E-17 | 7.28E-16 | 27.33623715 |
| TMEM16  | -0.820458136 | 4.01847231 | -8.928777285 | 8.55E-17 | 7.29E-16 | 27.33435688 |
| TOMM20  | -0.429118597 | 1.23741103 | -8.928325683 | 8.57E-17 | 7.31E-16 | 27.33128617 |
| DNAJB6  | -0.520760443 | 3.57533884 | -8.928079446 | 8.59E-17 | 7.32E-16 | 27.32961189 |
| ARMC8   | -0.501002291 | 3.50338474 | -8.926165449 | 8.70E-17 | 7.41E-16 | 27.31659857 |
| RPP38   | -0.40868132  | 4.49223088 | -8.926020294 | 8.71E-17 | 7.41E-16 | 27.31561171 |
| RASGRF  | -0.740091936 | 2.46378998 | -8.926017526 | 8.71E-17 | 7.41E-16 | 27.31559289 |
| IFT88   | -0.581448865 | 3.67802397 | -8.923654023 | 8.85E-17 | 7.53E-16 | 27.29952551 |
| LIAS    | -0.490502569 | 3.59722627 | -8.922704013 | 8.91E-17 | 7.58E-16 | 27.29306786 |
| GTF3C6  | -0.44314728  | 6.71484245 | -8.922334334 | 8.93E-17 | 7.59E-16 | 27.29055508 |
| RMND5B  | -0.434291592 | 4.50955341 | -8.921017851 | 9.02E-17 | 7.66E-16 | 27.28160713 |
| ZDHHC2  | -0.431812985 | 4.09445921 | -8.920848681 | 9.03E-17 | 7.66E-16 | 27.28045735 |
| PIGV    | -0.568935445 | 4.61189307 | -8.920592406 | 9.04E-17 | 7.67E-16 | 27.27871559 |

|          |              |            |              |          |          |             |
|----------|--------------|------------|--------------|----------|----------|-------------|
| ACSF3    | -0.550428043 | 3.20076828 | -8.91844036  | 9.18E-17 | 7.78E-16 | 27.26409028 |
| RIOK2    | -0.474959686 | 3.642586   | -8.91810398  | 9.20E-17 | 7.80E-16 | 27.26180441 |
| ZNF226   | -0.48732851  | 3.34849024 | -8.914659528 | 9.42E-17 | 7.98E-16 | 27.23840023 |
| P2RY6    | 1.06165774   | 2.09132971 | 8.913493448  | 9.50E-17 | 8.04E-16 | 27.23047808 |
| PEPD     | -0.526102662 | 5.71214274 | -8.911130258 | 9.65E-17 | 8.17E-16 | 27.21442464 |
| C6orf89  | -0.621028264 | 5.97027639 | -8.910673746 | 9.68E-17 | 8.19E-16 | 27.21132376 |
| SLC2A4   | -1.024320384 | 1.81501353 | -8.907628048 | 9.89E-17 | 8.36E-16 | 27.19063781 |
| HHEX     | -1.027049485 | 7.20059987 | -8.904608585 | 1.01E-16 | 8.53E-16 | 27.1701337  |
| PPP2R5I  | -0.493172075 | 4.47852841 | -8.904404398 | 1.01E-16 | 8.54E-16 | 27.16874727 |
| RBBP8N   | -0.989737852 | 2.91726586 | -8.904071222 | 1.01E-16 | 8.55E-16 | 27.16648504 |
| B3GNT9   | -0.816351479 | 5.70155522 | -8.901127921 | 1.03E-16 | 8.73E-16 | 27.14650227 |
| DPM2     | -0.56686152  | 5.89044465 | -8.899635241 | 1.04E-16 | 8.81E-16 | 27.13636943 |
| WBP1L    | -0.644600314 | 6.43866651 | -8.894607956 | 1.08E-16 | 9.12E-16 | 27.10224903 |
| ALDH1A1  | -1.388390161 | 7.18823976 | -8.892452367 | 1.10E-16 | 9.25E-16 | 27.08762205 |
| ANKRD1   | -0.502603349 | 0.98331115 | -8.892262395 | 1.10E-16 | 9.26E-16 | 27.08633307 |
| RAB10    | -0.595025352 | 6.806875   | -8.89110272  | 1.11E-16 | 9.32E-16 | 27.07846483 |
| GPT2     | -0.808216352 | 2.94988895 | -8.8896274   | 1.12E-16 | 9.42E-16 | 27.06845577 |
| KRT80    | 1.575783064  | 3.51512315 | 8.886823753  | 1.14E-16 | 9.59E-16 | 27.0494373  |
| PPP3CC   | -0.453895241 | 4.43221854 | -8.886243261 | 1.15E-16 | 9.63E-16 | 27.04549994 |
| DDTL     | -0.555285889 | 4.45828408 | -8.88513803  | 1.15E-16 | 9.70E-16 | 27.03800376 |
| C9orf85  | -0.472958473 | 2.84354222 | -8.884787323 | 1.16E-16 | 9.71E-16 | 27.03562521 |
| TLE1     | -0.750599088 | 3.58079091 | -8.883016312 | 1.17E-16 | 9.83E-16 | 27.02361467 |
| ARHGEF   | -0.256468697 | 0.49165993 | -8.882208303 | 1.18E-16 | 9.88E-16 | 27.01813539 |
| TARS2    | -0.446685353 | 4.59148339 | -8.881556933 | 1.18E-16 | 9.92E-16 | 27.0137185  |
| PXMP4    | -0.875921349 | 4.00211731 | -8.88037602  | 1.19E-16 | 9.99E-16 | 27.00571125 |
| SDHC     | -0.567244283 | 4.1277605  | -8.875680784 | 1.23E-16 | 1.03E-15 | 26.97388048 |
| FPGT     | -0.575347534 | 3.47540075 | -8.875385915 | 1.23E-16 | 1.03E-15 | 26.97188174 |
| STYXL1   | -0.441926651 | 5.43039594 | -8.873758475 | 1.25E-16 | 1.04E-15 | 26.96085098 |
| INPP5A   | -0.635321625 | 4.46919151 | -8.871928999 | 1.26E-16 | 1.06E-15 | 26.94845209 |
| C18orf21 | -0.413298696 | 4.23697289 | -8.870674535 | 1.27E-16 | 1.07E-15 | 26.93995101 |
| EMC10    | -0.564711944 | 6.5925332  | -8.87049327  | 1.28E-16 | 1.07E-15 | 26.93872269 |
| CCDC15   | -1.063753888 | 2.19917845 | -8.869725879 | 1.28E-16 | 1.07E-15 | 26.93352271 |
| RRAGA    | -0.536376942 | 7.40210183 | -8.869254974 | 1.29E-16 | 1.07E-15 | 26.93033188 |
| EARS2    | -0.5396216   | 4.0686028  | -8.869168723 | 1.29E-16 | 1.07E-15 | 26.92974746 |
| CD34     | -0.915899026 | 4.78754829 | -8.867915342 | 1.30E-16 | 1.08E-15 | 26.92125511 |
| TMBIM4   | -0.515893724 | 5.73942851 | -8.86751501  | 1.30E-16 | 1.09E-15 | 26.91854277 |
| CIAO2B   | -0.481406322 | 7.67545693 | -8.866312718 | 1.31E-16 | 1.09E-15 | 26.91039736 |
| STK32C   | -0.518571848 | 2.70012298 | -8.865884768 | 1.32E-16 | 1.10E-15 | 26.90749819 |
| RAB40B   | -0.580165503 | 3.02786759 | -8.864705514 | 1.33E-16 | 1.11E-15 | 26.89950963 |
| GOT1     | -0.871069501 | 5.86991908 | -8.861604608 | 1.36E-16 | 1.13E-15 | 26.87850601 |

|         |              |            |              |          |          |             |
|---------|--------------|------------|--------------|----------|----------|-------------|
| GAL3ST  | -1.085111649 | 4.90996628 | -8.861058957 | 1.36E-16 | 1.13E-15 | 26.87481051 |
| NAT16   | -1.198830566 | 0.98139691 | -8.858739554 | 1.38E-16 | 1.15E-15 | 26.85910336 |
| KCNK3   | -1.378585026 | 2.95784869 | -8.858336719 | 1.39E-16 | 1.15E-15 | 26.85637555 |
| MYO1G   | 1.599108521  | 2.76894449 | 8.856981784  | 1.40E-16 | 1.16E-15 | 26.84720107 |
| PPIL6   | -0.635490372 | 2.85224181 | -8.855943433 | 1.41E-16 | 1.17E-15 | 26.84017073 |
| ATAD3A  | -0.442610082 | 4.31564449 | -8.855685684 | 1.41E-16 | 1.17E-15 | 26.83842565 |
| DGCR6L  | -0.57640364  | 7.16359036 | -8.853225816 | 1.44E-16 | 1.19E-15 | 26.82177268 |
| MAPRE1  | -0.558865606 | 7.25632573 | -8.848641839 | 1.48E-16 | 1.23E-15 | 26.79074629 |
| PDE10A  | -1.047900851 | 1.96575894 | -8.848071077 | 1.49E-16 | 1.23E-15 | 26.78688372 |
| URI1    | -0.559737541 | 5.46137268 | -8.847855102 | 1.49E-16 | 1.23E-15 | 26.78542216 |
| NUDT13  | -0.456873482 | 1.76528217 | -8.846961648 | 1.50E-16 | 1.24E-15 | 26.77937615 |
| GLO1    | -0.476542697 | 6.73354295 | -8.845429708 | 1.52E-16 | 1.25E-15 | 26.76901024 |
| PBDC1   | -0.47133067  | 6.01772631 | -8.845087212 | 1.52E-16 | 1.26E-15 | 26.76669286 |
| ETNPPL  | -0.990583183 | 0.70342483 | -8.842865272 | 1.54E-16 | 1.27E-15 | 26.75166005 |
| HIRA    | -0.865473715 | 5.68825311 | -8.841435611 | 1.56E-16 | 1.29E-15 | 26.74198855 |
| RANBP3  | -0.765178285 | 1.08959516 | -8.841197671 | 1.56E-16 | 1.29E-15 | 26.740379   |
| REPIN1  | -0.519952315 | 5.93420391 | -8.840486629 | 1.57E-16 | 1.29E-15 | 26.73556926 |
| AKIP1   | -0.462151126 | 4.97280868 | -8.836603345 | 1.61E-16 | 1.33E-15 | 26.70930497 |
| MT1E    | -1.617089764 | 7.79092003 | -8.830283032 | 1.68E-16 | 1.39E-15 | 26.66657111 |
| ZADH2   | -0.547489409 | 4.08450658 | -8.828740216 | 1.70E-16 | 1.40E-15 | 26.65614205 |
| CYTH3   | -0.754766833 | 4.57312938 | -8.827564057 | 1.71E-16 | 1.41E-15 | 26.64819216 |
| CFL2    | -0.590049526 | 3.93068204 | -8.82714617  | 1.72E-16 | 1.41E-15 | 26.64536771 |
| C8orf88 | -0.950027036 | 1.81794347 | -8.825113748 | 1.74E-16 | 1.43E-15 | 26.63163183 |
| GPM6A   | -0.963862076 | 1.31652991 | -8.824825869 | 1.75E-16 | 1.44E-15 | 26.62968637 |
| PARP8   | -0.654241194 | 4.28868749 | -8.822037242 | 1.78E-16 | 1.46E-15 | 26.61084283 |
| CNPY2   | -0.539846043 | 5.16711952 | -8.821877189 | 1.78E-16 | 1.46E-15 | 26.60976141 |
| ACTBL2  | 0.842861207  | 0.81846295 | 8.821133242  | 1.79E-16 | 1.47E-15 | 26.60473493 |
| CHMP2A  | -0.49921433  | 7.86847035 | -8.820092979 | 1.80E-16 | 1.48E-15 | 26.59770678 |
| DYNLRB  | -0.476665943 | 7.33584185 | -8.819973479 | 1.81E-16 | 1.48E-15 | 26.59689944 |
| ANKRD3  | -0.778661168 | 2.60791544 | -8.817964893 | 1.83E-16 | 1.50E-15 | 26.58333051 |
| ALG8    | -0.470779442 | 5.0342632  | -8.816830808 | 1.84E-16 | 1.51E-15 | 26.57566997 |
| LCLAT1  | -0.61354996  | 3.12448116 | -8.814956639 | 1.87E-16 | 1.53E-15 | 26.56301143 |
| NME7    | -0.610890414 | 3.29231938 | -8.814075422 | 1.88E-16 | 1.54E-15 | 26.55706001 |
| PDGFB   | -0.798821671 | 4.51205589 | -8.813885715 | 1.88E-16 | 1.54E-15 | 26.55577883 |
| ATXN10  | -0.611245263 | 5.85702799 | -8.809215045 | 1.94E-16 | 1.59E-15 | 26.52424041 |
| ZC3H10  | -0.423765952 | 2.49414993 | -8.807530016 | 1.97E-16 | 1.61E-15 | 26.51286454 |
| CFAP298 | -0.483044401 | 4.55730237 | -8.806626674 | 1.98E-16 | 1.62E-15 | 26.50676643 |
| NSL1    | -0.471198617 | 3.95696481 | -8.80655595  | 1.98E-16 | 1.62E-15 | 26.50628901 |
| STT3B   | -0.670518206 | 6.63295118 | -8.805994258 | 1.99E-16 | 1.62E-15 | 26.50249743 |
| MANSC1  | -0.632877347 | 3.85218058 | -8.803363225 | 2.02E-16 | 1.65E-15 | 26.48473892 |



|         |              |            |              |          |          |             |
|---------|--------------|------------|--------------|----------|----------|-------------|
| MRPS18  | -0.507562495 | 5.35668596 | -8.802700225 | 2.03E-16 | 1.66E-15 | 26.48026436 |
| TRIAP1  | -0.436034613 | 5.2739989  | -8.802228153 | 2.04E-16 | 1.66E-15 | 26.47707847 |
| ADPRM   | -0.567363263 | 4.16787546 | -8.800987807 | 2.06E-16 | 1.67E-15 | 26.46870815 |
| GORASF  | -0.544133906 | 4.61332154 | -8.797953394 | 2.10E-16 | 1.71E-15 | 26.44823343 |
| ZNF420  | -0.536770768 | 2.97280273 | -8.797209968 | 2.11E-16 | 1.72E-15 | 26.44321773 |
| CHST14  | -0.727548368 | 4.365592   | -8.797060865 | 2.11E-16 | 1.72E-15 | 26.4422118  |
| WDR4    | -0.45470433  | 3.23292848 | -8.796671554 | 2.12E-16 | 1.72E-15 | 26.43958534 |
| NMRK1   | -0.586824371 | 5.07324156 | -8.792501424 | 2.18E-16 | 1.77E-15 | 26.4114557  |
| RAE1    | -0.458494819 | 3.79909845 | -8.791756704 | 2.19E-16 | 1.78E-15 | 26.40643293 |
| NECTIN4 | 1.787303336  | 3.72350288 | 8.790899849  | 2.20E-16 | 1.79E-15 | 26.40065416 |
| CFAP29C | -0.143051176 | 0.1306983  | -8.789866025 | 2.22E-16 | 1.80E-15 | 26.39368227 |
| CCDC71  | -0.525495537 | 5.75094619 | -8.788212031 | 2.24E-16 | 1.82E-15 | 26.382529   |
| NUP35   | -0.489704381 | 2.906469   | -8.783810786 | 2.31E-16 | 1.87E-15 | 26.35285584 |
| RNASET  | -0.593250388 | 4.26966308 | -8.779926414 | 2.37E-16 | 1.92E-15 | 26.32667403 |
| STT3A   | -0.630091369 | 6.0169234  | -8.779734077 | 2.38E-16 | 1.93E-15 | 26.32537778 |
| TMEM20  | -0.481024731 | 6.21061035 | -8.777434504 | 2.41E-16 | 1.96E-15 | 26.30988109 |
| TBXA2R  | -0.831974204 | 2.44896786 | -8.777276018 | 2.42E-16 | 1.96E-15 | 26.30881314 |
| COMMD1  | -0.522049377 | 4.98774714 | -8.777050632 | 2.42E-16 | 1.96E-15 | 26.3072944  |
| BTD     | -0.641404341 | 4.6172861  | -8.774872103 | 2.46E-16 | 1.99E-15 | 26.29261577 |
| DZIP3   | -0.614874602 | 3.68571919 | -8.774672867 | 2.46E-16 | 1.99E-15 | 26.29127344 |
| CRAT    | -0.523215901 | 5.22551876 | -8.774303695 | 2.47E-16 | 1.99E-15 | 26.28878623 |
| COX15   | -0.488079989 | 4.75443713 | -8.770336073 | 2.53E-16 | 2.05E-15 | 26.26205886 |
| CCNB1IF | -0.593327038 | 5.38064924 | -8.770149953 | 2.54E-16 | 2.05E-15 | 26.26080525 |
| ANP32A  | -0.489096194 | 5.50449243 | -8.769928585 | 2.54E-16 | 2.05E-15 | 26.25931424 |
| TMEM11  | -0.515861425 | 6.80059376 | -8.769148899 | 2.56E-16 | 2.06E-15 | 26.25406288 |
| ZNF688  | -0.514483351 | 3.85624666 | -8.769102666 | 2.56E-16 | 2.06E-15 | 26.2537515  |
| LRRC73  | -0.597574992 | 1.64531341 | -8.767995491 | 2.58E-16 | 2.07E-15 | 26.24629487 |
| SLC20A2 | -0.784350732 | 6.23183776 | -8.76655123  | 2.60E-16 | 2.09E-15 | 26.2365688  |
| GPR155  | -0.808185389 | 2.2629088  | -8.766260515 | 2.61E-16 | 2.10E-15 | 26.23461114 |
| RXRB    | -0.52444782  | 5.67573077 | -8.765933011 | 2.61E-16 | 2.10E-15 | 26.23240579 |
| TTC12   | -0.647706063 | 3.61753442 | -8.765543329 | 2.62E-16 | 2.11E-15 | 26.22978181 |
| RFX4    | -0.137637078 | 0.10757869 | -8.763475911 | 2.66E-16 | 2.13E-15 | 26.21586156 |
| ERLEC1  | -0.645101405 | 6.81189707 | -8.760628762 | 2.71E-16 | 2.17E-15 | 26.19669415 |
| SLC25A1 | -0.522896915 | 4.12863684 | -8.760582767 | 2.71E-16 | 2.17E-15 | 26.19638453 |
| L3MBTL4 | -0.662174092 | 1.77299927 | -8.758339876 | 2.75E-16 | 2.21E-15 | 26.18128747 |
| MUL1    | -0.610826122 | 5.49588529 | -8.756807934 | 2.78E-16 | 2.23E-15 | 26.17097704 |
| KATNA1  | -0.47486258  | 4.56188762 | -8.752700291 | 2.86E-16 | 2.29E-15 | 26.14333617 |
| RBIS    | -0.480366164 | 4.82410945 | -8.752477547 | 2.86E-16 | 2.29E-15 | 26.1418375  |
| PIGX    | -0.411068905 | 3.86893624 | -8.750796523 | 2.90E-16 | 2.32E-15 | 26.13052782 |
| CEBPZO  | -0.498690604 | 5.0427293  | -8.750724124 | 2.90E-16 | 2.32E-15 | 26.13004076 |

|         |              |            |              |          |          |             |
|---------|--------------|------------|--------------|----------|----------|-------------|
| HDAC1   | -0.61047176  | 7.11802403 | -8.750638523 | 2.90E-16 | 2.32E-15 | 26.12946488 |
| CDNF    | -0.68204963  | 2.61934876 | -8.750229354 | 2.91E-16 | 2.33E-15 | 26.12671226 |
| SERP1   | -0.554722522 | 6.68524248 | -8.749397467 | 2.92E-16 | 2.34E-15 | 26.12111608 |
| SYT1    | 1.301572038  | 1.38704014 | 8.747905111  | 2.95E-16 | 2.36E-15 | 26.11107759 |
| MLST8   | -0.457953273 | 5.29098055 | -8.744798986 | 3.02E-16 | 2.41E-15 | 26.09018684 |
| SPCS3   | -0.659016977 | 5.86365484 | -8.743913976 | 3.04E-16 | 2.42E-15 | 26.0842353  |
| CUTC    | -0.459841917 | 4.81557153 | -8.74267879  | 3.06E-16 | 2.44E-15 | 26.07592941 |
| FAM53B  | -0.645735624 | 5.47002882 | -8.74173022  | 3.08E-16 | 2.46E-15 | 26.06955128 |
| HHLA3   | -0.511356545 | 4.79034161 | -8.740739516 | 3.10E-16 | 2.47E-15 | 26.06289024 |
| SYNDIG  | -1.219417033 | 2.20555197 | -8.740111374 | 3.12E-16 | 2.48E-15 | 26.05866711 |
| BZW2    | -0.561436888 | 5.51163601 | -8.740041898 | 3.12E-16 | 2.48E-15 | 26.05820002 |
| SGSM3   | -0.543147656 | 5.1616262  | -8.737563571 | 3.17E-16 | 2.52E-15 | 26.04153937 |
| SLC49A4 | -0.600964603 | 3.93110608 | -8.733951037 | 3.25E-16 | 2.58E-15 | 26.01725853 |
| VPS28   | -0.534005034 | 6.79829102 | -8.733287698 | 3.26E-16 | 2.60E-15 | 26.01280064 |
| AMACR   | -0.672426333 | 1.83580619 | -8.733047563 | 3.27E-16 | 2.60E-15 | 26.01118689 |
| HSPBP1  | -0.487815061 | 5.93833732 | -8.731539065 | 3.30E-16 | 2.62E-15 | 26.00105002 |
| NADK2   | -0.540767391 | 4.00059115 | -8.73078027  | 3.32E-16 | 2.64E-15 | 25.9959514  |
| GARNL3  | -0.558781052 | 1.51025494 | -8.730566112 | 3.33E-16 | 2.64E-15 | 25.99451243 |
| UNC119F | -0.783063187 | 5.1801641  | -8.730019036 | 3.34E-16 | 2.65E-15 | 25.99083663 |
| CDH5    | -0.824898923 | 5.09518172 | -8.728712105 | 3.37E-16 | 2.67E-15 | 25.98205585 |
| NKIRAS1 | -0.465022926 | 3.61011244 | -8.728702442 | 3.37E-16 | 2.67E-15 | 25.98199093 |
| MACO1   | -0.506910271 | 5.18787796 | -8.727682873 | 3.39E-16 | 2.69E-15 | 25.97514132 |
| NIPSNAP | -0.561829385 | 5.95693355 | -8.727513565 | 3.39E-16 | 2.69E-15 | 25.97400393 |
| KLHL22  | -0.504403374 | 4.61801815 | -8.724773686 | 3.46E-16 | 2.74E-15 | 25.95559937 |
| FAM110I | -0.82901384  | 2.76870463 | -8.724356192 | 3.47E-16 | 2.74E-15 | 25.95279521 |
| NSUN4   | -0.486358312 | 3.2401425  | -8.722133943 | 3.52E-16 | 2.78E-15 | 25.93787041 |
| ERBB3   | 1.396225742  | 4.24487712 | 8.719436283  | 3.59E-16 | 2.83E-15 | 25.91975545 |
| ITGB8   | 1.239052518  | 2.2100364  | 8.717250847  | 3.64E-16 | 2.88E-15 | 25.90508233 |
| TBL2    | -0.570115595 | 4.87634157 | -8.716610298 | 3.66E-16 | 2.89E-15 | 25.90078203 |
| SIAE    | -0.789954086 | 5.50595669 | -8.715927811 | 3.67E-16 | 2.90E-15 | 25.89620037 |
| AP3S2   | -0.519586462 | 3.65110477 | -8.713156827 | 3.74E-16 | 2.95E-15 | 25.87760024 |
| CLMN    | -0.706839408 | 1.55582263 | -8.712201806 | 3.77E-16 | 2.97E-15 | 25.87119043 |
| HIST1H2 | -1.204636176 | 2.77287071 | -8.710635089 | 3.81E-16 | 3.00E-15 | 25.86067593 |
| COG8    | -0.495713094 | 3.59253183 | -8.710114011 | 3.82E-16 | 3.01E-15 | 25.85717912 |
| LIFR    | -1.229907281 | 3.07018069 | -8.707434171 | 3.89E-16 | 3.06E-15 | 25.83919722 |
| SNRNP3  | -0.477107024 | 4.06095747 | -8.70380998  | 3.99E-16 | 3.14E-15 | 25.81488344 |
| TSR3    | -0.508918562 | 6.80551858 | -8.703151768 | 4.01E-16 | 3.15E-15 | 25.81046825 |
| MIPEP   | -0.542378829 | 4.08659307 | -8.70233605  | 4.03E-16 | 3.17E-15 | 25.80499678 |
| CLPB    | -0.484825    | 3.27932757 | -8.700942211 | 4.07E-16 | 3.20E-15 | 25.79564817 |
| TRMT5   | -0.4296282   | 3.14066584 | -8.700123589 | 4.09E-16 | 3.21E-15 | 25.79015798 |

|          |              |            |              |          |          |             |
|----------|--------------|------------|--------------|----------|----------|-------------|
| MTMR4    | -0.696742737 | 3.79800647 | -8.699600498 | 4.11E-16 | 3.22E-15 | 25.78664995 |
| TMED10   | -0.666379758 | 7.7223129  | -8.699027302 | 4.12E-16 | 3.23E-15 | 25.78280604 |
| POLR2J   | -0.560648671 | 6.42575805 | -8.69894098  | 4.12E-16 | 3.24E-15 | 25.78222716 |
| TMEM10   | -0.586937867 | 3.8788016  | -8.698837263 | 4.13E-16 | 3.24E-15 | 25.78153164 |
| GIMAP8   | -0.875043853 | 3.84314554 | -8.69707892  | 4.18E-16 | 3.27E-15 | 25.76974098 |
| PSTPIP2  | 0.699752387  | 1.87736538 | 8.692990782  | 4.29E-16 | 3.36E-15 | 25.74233275 |
| SPOCK2   | 1.87597356   | 5.93426835 | 8.692790719  | 4.30E-16 | 3.37E-15 | 25.74099164 |
| PRCC     | -0.468503041 | 5.43559515 | -8.691821459 | 4.33E-16 | 3.39E-15 | 25.73449451 |
| FAM98A   | -0.527759471 | 4.62976878 | -8.691351854 | 4.34E-16 | 3.40E-15 | 25.7313468  |
| GOLGA8   | -0.943367777 | 1.07504156 | -8.690769457 | 4.36E-16 | 3.41E-15 | 25.72744319 |
| PRKCE    | -0.609166918 | 1.77315007 | -8.690623732 | 4.36E-16 | 3.41E-15 | 25.72646646 |
| VDAC2    | -0.497736362 | 5.85196963 | -8.68877495  | 4.42E-16 | 3.45E-15 | 25.71407574 |
| CCDC25   | -0.520184756 | 5.17921865 | -8.688469787 | 4.43E-16 | 3.46E-15 | 25.71203064 |
| WDR92    | -0.319965919 | 1.22882151 | -8.687413355 | 4.46E-16 | 3.48E-15 | 25.7049511  |
| PCDH12   | -0.892957057 | 3.80425931 | -8.684406649 | 4.55E-16 | 3.55E-15 | 25.68480463 |
| DPM1     | -0.534781575 | 6.18067168 | -8.680685144 | 4.67E-16 | 3.64E-15 | 25.65987387 |
| TXNDC1   | -0.490951619 | 6.18836189 | -8.680323641 | 4.68E-16 | 3.65E-15 | 25.65745243 |
| PTP4A2   | -0.519402561 | 6.97182044 | -8.6800768   | 4.69E-16 | 3.65E-15 | 25.65579906 |
| SLC35B3  | -0.624562712 | 5.14461951 | -8.677858201 | 4.76E-16 | 3.71E-15 | 25.64093976 |
| ARL4A    | -0.584285884 | 3.26701578 | -8.675518748 | 4.84E-16 | 3.76E-15 | 25.62527326 |
| RFESD    | -0.287663819 | 1.24833777 | -8.672905311 | 4.92E-16 | 3.83E-15 | 25.6077747  |
| ALG3     | -0.447857565 | 4.78971219 | -8.672728905 | 4.93E-16 | 3.83E-15 | 25.60659365 |
| SERPIN/  | 2.607669499  | 8.40740909 | 8.672487688  | 4.94E-16 | 3.84E-15 | 25.60497872 |
| SPSB2    | -0.600996111 | 4.5490479  | -8.670297908 | 5.01E-16 | 3.89E-15 | 25.5903194  |
| AIMP1    | -0.468430209 | 5.60067761 | -8.670023567 | 5.02E-16 | 3.90E-15 | 25.58848298 |
| SOSTDC   | -0.935463325 | 0.78091347 | -8.668594182 | 5.07E-16 | 3.93E-15 | 25.57891532 |
| CCS      | -0.592412236 | 5.59309012 | -8.668236836 | 5.08E-16 | 3.94E-15 | 25.57652354 |
| C1orf210 | -0.746963913 | 5.38281779 | -8.667514173 | 5.11E-16 | 3.96E-15 | 25.57168679 |
| NPPC     | -1.352922198 | 1.38399257 | -8.663868564 | 5.23E-16 | 4.06E-15 | 25.54729025 |
| PPP1R3I  | -0.58880714  | 3.18445964 | -8.663848031 | 5.23E-16 | 4.06E-15 | 25.54715286 |
| AKIRIN1  | -0.750764817 | 5.94734745 | -8.662806153 | 5.27E-16 | 4.08E-15 | 25.54018162 |
| C4orf47  | -0.752391389 | 2.38376216 | -8.661693178 | 5.31E-16 | 4.11E-15 | 25.53273516 |
| RUUBL2   | -0.460261313 | 6.13351462 | -8.661214273 | 5.33E-16 | 4.12E-15 | 25.52953116 |
| PRMT7    | -0.488279564 | 3.07624542 | -8.656555067 | 5.50E-16 | 4.25E-15 | 25.49836494 |
| ACKR3    | -1.062832042 | 5.17815963 | -8.655522294 | 5.54E-16 | 4.28E-15 | 25.49145778 |
| UBA5     | -0.498369083 | 4.16018672 | -8.654759522 | 5.57E-16 | 4.30E-15 | 25.48635667 |
| POLR2C   | -0.501702429 | 5.85659787 | -8.652940647 | 5.64E-16 | 4.35E-15 | 25.47419376 |
| FGF12    | -1.022099608 | 1.4666658  | -8.651701341 | 5.68E-16 | 4.39E-15 | 25.46590726 |
| HOGA1    | -0.745843284 | 0.79462141 | -8.650857855 | 5.72E-16 | 4.41E-15 | 25.46026774 |
| PLCH1    | -1.006477489 | 1.57725878 | -8.650593683 | 5.73E-16 | 4.42E-15 | 25.45850156 |

|          |              |            |              |          |          |             |
|----------|--------------|------------|--------------|----------|----------|-------------|
| ADAMTS   | -1.0164997   | 2.26836073 | -8.647976395 | 5.83E-16 | 4.49E-15 | 25.44100466 |
| ZFP3     | -0.620277098 | 2.94373268 | -8.644504882 | 5.97E-16 | 4.60E-15 | 25.41780161 |
| TAF13    | -0.572231311 | 5.53110725 | -8.643509562 | 6.01E-16 | 4.63E-15 | 25.41114999 |
| SFXN5    | -0.490341656 | 2.36660035 | -8.639739493 | 6.16E-16 | 4.75E-15 | 25.38595879 |
| PMPCA    | -0.400984784 | 4.67586206 | -8.638256493 | 6.23E-16 | 4.79E-15 | 25.37605119 |
| ZFPL1    | -0.462529716 | 3.37825482 | -8.637449243 | 6.26E-16 | 4.82E-15 | 25.37065852 |
| FCGRT    | -0.713096844 | 6.38736188 | -8.636258053 | 6.31E-16 | 4.85E-15 | 25.36270151 |
| ZNF775   | -0.560630855 | 2.9620614  | -8.635861705 | 6.33E-16 | 4.86E-15 | 25.36005409 |
| MOB2     | -0.479151624 | 4.62834832 | -8.634662647 | 6.38E-16 | 4.90E-15 | 25.35204534 |
| FAM155E  | -1.839621417 | 4.03254213 | -8.634189305 | 6.40E-16 | 4.91E-15 | 25.34888396 |
| CDH11    | 1.392933611  | 2.18886632 | 8.63329552   | 6.44E-16 | 4.94E-15 | 25.34291476 |
| PGAP2    | -0.546663554 | 4.61638501 | -8.631953865 | 6.50E-16 | 4.98E-15 | 25.33395507 |
| AVPR1A   | -1.192056654 | 1.8837129  | -8.63068484  | 6.55E-16 | 5.03E-15 | 25.32548111 |
| C11orf52 | -0.199048235 | 0.2708262  | -8.630073829 | 6.58E-16 | 5.04E-15 | 25.32140131 |
| HIST1H2  | -0.512470814 | 1.06706019 | -8.625125622 | 6.81E-16 | 5.21E-15 | 25.28836727 |
| DPP6     | -1.341303359 | 1.27854411 | -8.623387059 | 6.89E-16 | 5.27E-15 | 25.27676315 |
| KCNK16   | -1.352688231 | 0.96327175 | -8.62325617  | 6.89E-16 | 5.28E-15 | 25.27588958 |
| CEACAM   | 1.901250829  | 2.08311041 | 8.619998431  | 7.05E-16 | 5.39E-15 | 25.25414929 |
| MET      | 1.428032546  | 6.96089416 | 8.619206738  | 7.08E-16 | 5.42E-15 | 25.24886666 |
| ZNRF1    | -0.510000777 | 4.24047099 | -8.619138677 | 7.09E-16 | 5.42E-15 | 25.24841253 |
| SMARCA   | -0.775684554 | 6.08418885 | -8.617364204 | 7.17E-16 | 5.48E-15 | 25.23657325 |
| DLG2     | -0.926869599 | 1.24512432 | -8.616895743 | 7.20E-16 | 5.49E-15 | 25.23344791 |
| GINM1    | -0.588993989 | 7.16756882 | -8.615411825 | 7.27E-16 | 5.55E-15 | 25.22354853 |
| NT5M     | -0.628549002 | 2.17565708 | -8.615010073 | 7.29E-16 | 5.56E-15 | 25.22086855 |
| EMID1    | -1.557529873 | 3.67906432 | -8.613318077 | 7.37E-16 | 5.62E-15 | 25.2095825  |
| MID1     | -0.651074882 | 2.03376296 | -8.611761206 | 7.45E-16 | 5.68E-15 | 25.19919883 |
| NUS1     | -0.597186386 | 4.62028595 | -8.611302252 | 7.47E-16 | 5.69E-15 | 25.196138   |
| HIST1H2  | -0.784626056 | 1.31723021 | -8.610315455 | 7.52E-16 | 5.73E-15 | 25.18955722 |
| NUBP1    | -0.43454891  | 5.17386087 | -8.608534571 | 7.61E-16 | 5.80E-15 | 25.17768184 |
| ROR1     | 0.837211483  | 1.17148061 | 8.608075014  | 7.64E-16 | 5.81E-15 | 25.17461761 |
| NDUFS8   | -0.473316052 | 6.05760392 | -8.606209166 | 7.73E-16 | 5.88E-15 | 25.16217749 |
| CHADL    | -0.706839651 | 2.98533369 | -8.606017488 | 7.74E-16 | 5.89E-15 | 25.1608996  |
| DDT      | -0.580083048 | 5.32158424 | -8.604238063 | 7.84E-16 | 5.96E-15 | 25.1490372  |
| FOXP2    | -0.775275922 | 1.02432705 | -8.603686422 | 7.87E-16 | 5.98E-15 | 25.14536001 |
| FBXW9    | -0.579920375 | 4.15501271 | -8.60335653  | 7.89E-16 | 5.99E-15 | 25.14316104 |
| TFG      | -0.504316714 | 5.9265463  | -8.602446891 | 7.93E-16 | 6.02E-15 | 25.13709786 |
| MLX      | -0.465834442 | 5.05605922 | -8.599907979 | 8.07E-16 | 6.12E-15 | 25.12017667 |
| AIG1     | -0.47774412  | 4.91015151 | -8.598942594 | 8.12E-16 | 6.16E-15 | 25.11374335 |
| DUS4L    | -0.424776332 | 2.36923848 | -8.597593262 | 8.20E-16 | 6.21E-15 | 25.10475208 |
| EBI3     | 1.244578936  | 2.94570875 | 8.596793418  | 8.24E-16 | 6.24E-15 | 25.09942269 |

|         |              |            |              |          |          |             |
|---------|--------------|------------|--------------|----------|----------|-------------|
| SCML2   | -0.52286327  | 1.13911372 | -8.596065243 | 8.28E-16 | 6.27E-15 | 25.09457106 |
| THAP3   | -0.509280659 | 3.91435647 | -8.595263131 | 8.33E-16 | 6.30E-15 | 25.08922707 |
| ISCU    | -0.504947372 | 7.24123538 | -8.594902733 | 8.35E-16 | 6.32E-15 | 25.08682605 |
| ERICH6  | -0.194566258 | 0.33807937 | -8.592732383 | 8.47E-16 | 6.41E-15 | 25.07236804 |
| REEP5   | -0.529336093 | 8.19687607 | -8.592200374 | 8.50E-16 | 6.43E-15 | 25.06882431 |
| CCDC40  | -0.544761527 | 1.71085682 | -8.590888249 | 8.58E-16 | 6.48E-15 | 25.06008473 |
| CALM3   | -0.547052548 | 7.84418088 | -8.588826649 | 8.70E-16 | 6.57E-15 | 25.04635465 |
| SLC25A4 | -0.664801868 | 3.02030375 | -8.588605552 | 8.71E-16 | 6.58E-15 | 25.04488228 |
| YBX1    | -0.486937353 | 8.70339034 | -8.586861777 | 8.82E-16 | 6.65E-15 | 25.03327046 |
| PEAR1   | -0.842284702 | 2.42945278 | -8.586126257 | 8.86E-16 | 6.68E-15 | 25.02837302 |
| SF3B6   | -0.487857574 | 7.21509123 | -8.5859724   | 8.87E-16 | 6.69E-15 | 25.02734859 |
| RNF5    | -0.458773932 | 7.0159595  | -8.585260382 | 8.91E-16 | 6.71E-15 | 25.02260791 |
| PLAUR   | 1.372760939  | 3.49340909 | 8.583110207  | 9.04E-16 | 6.81E-15 | 25.00829313 |
| USP16   | -0.588543744 | 4.5818894  | -8.582031223 | 9.11E-16 | 6.86E-15 | 25.00111055 |
| DIPK2B  | -0.749815428 | 3.53179169 | -8.581037237 | 9.17E-16 | 6.90E-15 | 24.99449422 |
| FBXO25  | -0.463481797 | 3.74751923 | -8.580891738 | 9.18E-16 | 6.90E-15 | 24.99352576 |
| NICN1   | -0.524924475 | 5.00446455 | -8.580329709 | 9.21E-16 | 6.93E-15 | 24.98978492 |
| ELF3    | 1.39051922   | 3.74059188 | 8.580071513  | 9.23E-16 | 6.94E-15 | 24.98806642 |
| SYPL1   | -0.655773854 | 7.11379538 | -8.578028571 | 9.36E-16 | 7.03E-15 | 24.97447004 |
| HIST1H3 | -0.900388411 | 1.65445399 | -8.577932965 | 9.36E-16 | 7.03E-15 | 24.97383379 |
| NR1H3   | -0.568520812 | 3.50587852 | -8.5772186   | 9.41E-16 | 7.06E-15 | 24.96907993 |
| CCL20   | 1.300744071  | 1.54281972 | 8.575207184  | 9.54E-16 | 7.15E-15 | 24.95569581 |
| MED29   | -0.48940919  | 6.54812882 | -8.574121239 | 9.61E-16 | 7.20E-15 | 24.94847056 |
| URM1    | -0.420393591 | 5.34967806 | -8.573486117 | 9.65E-16 | 7.23E-15 | 24.94424506 |
| WDR78   | -0.521229358 | 2.3467153  | -8.573376287 | 9.66E-16 | 7.23E-15 | 24.94351437 |
| EFCAB1  | -0.535549872 | 0.90744146 | -8.570493851 | 9.85E-16 | 7.37E-15 | 24.92433968 |
| RCC1L   | -0.410697794 | 5.63869979 | -8.569196076 | 9.93E-16 | 7.43E-15 | 24.91570772 |
| PEX7    | -0.516656034 | 4.45245354 | -8.569083546 | 9.94E-16 | 7.43E-15 | 24.91495928 |
| TAF8    | -0.488304805 | 3.62469062 | -8.569051083 | 9.94E-16 | 7.43E-15 | 24.91474336 |
| MYL6B   | -0.563973287 | 5.88901849 | -8.568953942 | 9.95E-16 | 7.44E-15 | 24.91409728 |
| VAPB    | -0.653042273 | 4.44063444 | -8.567927919 | 1.00E-15 | 7.48E-15 | 24.90727345 |
| KRBOX4  | -0.479185941 | 3.0902315  | -8.565930677 | 1.02E-15 | 7.58E-15 | 24.89399158 |
| GBP2    | 1.359847076  | 4.7164879  | 8.565215145  | 1.02E-15 | 7.62E-15 | 24.88923363 |
| ISCA2   | -0.497893449 | 5.4192246  | -8.563878768 | 1.03E-15 | 7.68E-15 | 24.88034795 |
| IPCEF1  | -1.453819265 | 2.29313528 | -8.562614149 | 1.04E-15 | 7.74E-15 | 24.8719401  |
| AURKAIF | -0.553530916 | 7.06288194 | -8.562014754 | 1.04E-15 | 7.77E-15 | 24.86795524 |
| SYAP1   | -0.467678752 | 5.04876119 | -8.561800916 | 1.04E-15 | 7.78E-15 | 24.86653366 |
| CALCOC  | -0.551710558 | 5.07365725 | -8.559544777 | 1.06E-15 | 7.90E-15 | 24.85153615 |
| PTPRU   | 1.205458812  | 4.12335271 | 8.558063433  | 1.07E-15 | 7.97E-15 | 24.84169022 |
| MEA1    | -0.421384019 | 7.59967392 | -8.556505573 | 1.08E-15 | 8.05E-15 | 24.83133674 |

|         |              |            |              |          |          |             |
|---------|--------------|------------|--------------|----------|----------|-------------|
| GPAA1   | -0.615086306 | 6.93078576 | -8.555156398 | 1.09E-15 | 8.12E-15 | 24.82237101 |
| UNC5CL  | 1.11106293   | 2.4529338  | 8.554501705  | 1.10E-15 | 8.15E-15 | 24.81802063 |
| KIF17   | -0.51343456  | 1.49179847 | -8.554157525 | 1.10E-15 | 8.17E-15 | 24.81573366 |
| TIMP4   | -0.77936904  | 1.0804376  | -8.553842604 | 1.10E-15 | 8.18E-15 | 24.81364115 |
| SMAD6   | -0.742803634 | 3.42835734 | -8.553379161 | 1.11E-15 | 8.21E-15 | 24.81056185 |
| TIMM10E | -0.503640702 | 5.39105832 | -8.547350987 | 1.15E-15 | 8.54E-15 | 24.77051673 |
| EIF2D   | -0.4101501   | 4.68608091 | -8.546007554 | 1.16E-15 | 8.62E-15 | 24.76159445 |
| STMN3   | -0.836429447 | 6.71603217 | -8.545860152 | 1.16E-15 | 8.62E-15 | 24.76061554 |
| DTNB    | -0.562377482 | 4.0474043  | -8.545433457 | 1.17E-15 | 8.64E-15 | 24.75778188 |
| MSANTD  | -0.511152739 | 4.11546698 | -8.544491709 | 1.17E-15 | 8.69E-15 | 24.75152804 |
| ANKRD1  | -0.392903446 | 2.96397265 | -8.543799051 | 1.18E-15 | 8.73E-15 | 24.74692857 |
| NAP1L2  | -0.790060373 | 3.83631498 | -8.543712537 | 1.18E-15 | 8.73E-15 | 24.7463541  |
| PLA2R1  | -1.247818172 | 2.832586   | -8.542953145 | 1.19E-15 | 8.77E-15 | 24.74131177 |
| ARSG    | -0.613574442 | 2.70398306 | -8.542118669 | 1.19E-15 | 8.82E-15 | 24.73577116 |
| MVB12A  | -0.460397676 | 5.23813184 | -8.540767785 | 1.20E-15 | 8.89E-15 | 24.72680244 |
| CREM    | -0.536789689 | 3.41817526 | -8.54068679  | 1.20E-15 | 8.90E-15 | 24.72626473 |
| CYB5B   | -0.398002901 | 4.915392   | -8.540190667 | 1.21E-15 | 8.92E-15 | 24.72297111 |
| ENDOV   | -0.478578136 | 3.31450177 | -8.540115237 | 1.21E-15 | 8.92E-15 | 24.72247035 |
| NHP2    | -0.523039354 | 6.39418639 | -8.539262175 | 1.22E-15 | 8.97E-15 | 24.71680739 |
| LRRC23  | -0.531023327 | 3.89704547 | -8.539223118 | 1.22E-15 | 8.97E-15 | 24.71654813 |
| PEX11B  | -0.488887084 | 6.1438367  | -8.539122231 | 1.22E-15 | 8.97E-15 | 24.71587842 |
| ACAD9   | -0.397883271 | 5.07262424 | -8.538536135 | 1.22E-15 | 9.00E-15 | 24.7119879  |
| SDCCAG  | -0.559001108 | 4.73366526 | -8.535331552 | 1.25E-15 | 9.19E-15 | 24.69071842 |
| THTPA   | -0.682259047 | 3.22037663 | -8.533470586 | 1.26E-15 | 9.31E-15 | 24.67836884 |
| RBM4B   | -0.506260331 | 3.66338645 | -8.533396523 | 1.26E-15 | 9.31E-15 | 24.67787738 |
| CMAS    | -0.482009432 | 5.57610449 | -8.532027774 | 1.28E-15 | 9.39E-15 | 24.6687952  |
| ZCWPW   | -0.541770383 | 3.24424152 | -8.52822059  | 1.31E-15 | 9.63E-15 | 24.64353732 |
| GNRH2   | -0.507536921 | 0.6611189  | -8.52703765  | 1.32E-15 | 9.70E-15 | 24.63569065 |
| ALYREF  | -0.573378406 | 6.21479531 | -8.526567702 | 1.32E-15 | 9.73E-15 | 24.63257356 |
| FZD9    | -0.305416392 | 0.35827046 | -8.526045205 | 1.33E-15 | 9.76E-15 | 24.62910804 |
| RER1    | -0.394888393 | 5.60842464 | -8.52598509  | 1.33E-15 | 9.76E-15 | 24.62870933 |
| CCT3    | -0.468723198 | 7.22640063 | -8.525491967 | 1.33E-15 | 9.79E-15 | 24.62543875 |
| NME9    | -0.43949612  | 0.98062262 | -8.518321134 | 1.40E-15 | 1.03E-14 | 24.577891   |
| RALY    | -0.43347723  | 6.51470744 | -8.517375211 | 1.41E-15 | 1.03E-14 | 24.57162051 |
| ZNF658  | -0.42926583  | 1.25847953 | -8.516915421 | 1.41E-15 | 1.04E-14 | 24.56857272 |
| BACH2   | 0.589802334  | 1.13498736 | 8.516121597  | 1.42E-15 | 1.04E-14 | 24.56331095 |
| BMP7    | -0.788462106 | 6.30713187 | -8.513241887 | 1.45E-15 | 1.06E-14 | 24.54422542 |
| ADCY7   | 0.788801163  | 1.25898807 | 8.511885705  | 1.46E-15 | 1.07E-14 | 24.53523845 |
| ALDH3B1 | 1.23232798   | 3.79789018 | 8.511066854  | 1.47E-15 | 1.08E-14 | 24.52981258 |
| COIL    | -0.511231149 | 4.40821625 | -8.508834918 | 1.49E-15 | 1.09E-14 | 24.5150248  |

|         |              |            |              |          |          |             |
|---------|--------------|------------|--------------|----------|----------|-------------|
| ELAC2   | -0.421006075 | 5.05872612 | -8.508430502 | 1.50E-15 | 1.09E-14 | 24.51234556 |
| C2CD4A  | 1.560759921  | 1.84669397 | 8.506279416  | 1.52E-15 | 1.11E-14 | 24.49809588 |
| TECTB   | -0.516470114 | 0.37304059 | -8.504091938 | 1.54E-15 | 1.12E-14 | 24.48360719 |
| MTLN    | -0.739316213 | 4.55386705 | -8.503046418 | 1.55E-15 | 1.13E-14 | 24.47668295 |
| FIBP    | -0.461503384 | 5.93115511 | -8.502652303 | 1.55E-15 | 1.13E-14 | 24.47407294 |
| LCN2    | 2.391320152  | 4.64147571 | 8.50221363   | 1.56E-15 | 1.14E-14 | 24.47116793 |
| BLCAP   | -0.406222016 | 5.13122867 | -8.50041951  | 1.58E-15 | 1.15E-14 | 24.45928764 |
| TMEM16  | -0.555641282 | 5.43973363 | -8.498955652 | 1.59E-15 | 1.16E-14 | 24.44959531 |
| CACNG4  | 1.506054753  | 1.7295845  | 8.496316087  | 1.62E-15 | 1.18E-14 | 24.43212089 |
| NUDT6   | -0.397848922 | 1.32336806 | -8.496069341 | 1.63E-15 | 1.18E-14 | 24.43048754 |
| MAPK8   | -0.539987515 | 3.58620441 | -8.496042262 | 1.63E-15 | 1.18E-14 | 24.43030829 |
| MRPL19  | -0.545441966 | 4.24788826 | -8.495749008 | 1.63E-15 | 1.18E-14 | 24.42836711 |
| ST3GAL1 | -0.903196378 | 2.24992008 | -8.495562129 | 1.63E-15 | 1.19E-14 | 24.4271301  |
| FAM216A | -0.456572812 | 2.22060719 | -8.495504656 | 1.63E-15 | 1.19E-14 | 24.42674967 |
| ACOT11  | -0.768595921 | 2.16016184 | -8.495125044 | 1.64E-15 | 1.19E-14 | 24.42423694 |
| AR      | -1.010909643 | 1.57798593 | -8.49281011  | 1.66E-15 | 1.21E-14 | 24.40891534 |
| DRC3    | -0.698374945 | 2.78022924 | -8.492136147 | 1.67E-15 | 1.21E-14 | 24.40445508 |
| RRNAD1  | -0.505134932 | 5.32406611 | -8.491642598 | 1.67E-15 | 1.22E-14 | 24.40118893 |
| NEXN    | -0.890401778 | 2.32112432 | -8.488552133 | 1.71E-15 | 1.24E-14 | 24.3807396  |
| CA5A    | -0.162923338 | 0.17272021 | -8.486124288 | 1.74E-15 | 1.26E-14 | 24.36467768 |
| GRB10   | -0.83040754  | 4.21266706 | -8.483560873 | 1.77E-15 | 1.28E-14 | 24.34772165 |
| WNT10A  | 1.580579387  | 2.08071345 | 8.483038836  | 1.77E-15 | 1.29E-14 | 24.34426892 |
| PPIH    | -0.431229511 | 5.35322376 | -8.48198083  | 1.79E-15 | 1.29E-14 | 24.33727169 |
| BORCS6  | -0.474192737 | 3.8346965  | -8.481647723 | 1.79E-15 | 1.30E-14 | 24.33506875 |
| FAM167E | -0.833210601 | 5.12483211 | -8.481645039 | 1.79E-15 | 1.30E-14 | 24.335051   |
| PSMB1   | -0.439840101 | 7.62006867 | -8.480926484 | 1.80E-15 | 1.30E-14 | 24.33029914 |
| SLC35G2 | -0.565764121 | 2.50651637 | -8.477577559 | 1.84E-15 | 1.33E-14 | 24.30815543 |
| ITM2B   | -0.544488096 | 7.95075982 | -8.475970246 | 1.86E-15 | 1.34E-14 | 24.29752932 |
| MAPRE2  | -0.689502939 | 4.14840732 | -8.47437307  | 1.88E-15 | 1.36E-14 | 24.28697134 |
| C7orf26 | -0.467193378 | 4.89932174 | -8.472900061 | 1.90E-15 | 1.37E-14 | 24.27723514 |
| DNAAF3  | -0.825887056 | 1.67524118 | -8.470849161 | 1.92E-15 | 1.39E-14 | 24.26368081 |
| EIF5A   | -0.368930532 | 8.36259891 | -8.470048934 | 1.94E-15 | 1.40E-14 | 24.25839264 |
| CDC37   | -0.450707179 | 7.26318424 | -8.468831036 | 1.95E-15 | 1.41E-14 | 24.25034489 |
| CAMTA1  | -0.423720288 | 3.66590048 | -8.467767128 | 1.97E-15 | 1.42E-14 | 24.24331522 |
| KDM8    | -0.387288864 | 2.56874902 | -8.4659175   | 1.99E-15 | 1.43E-14 | 24.23109516 |
| ARHGEF  | 1.187056114  | 1.71440453 | 8.465826213  | 1.99E-15 | 1.43E-14 | 24.23049209 |
| ADAM22  | -0.676219826 | 1.23400884 | -8.465710599 | 1.99E-15 | 1.43E-14 | 24.22972831 |
| PRMT9   | -0.616843181 | 3.64261656 | -8.465202884 | 2.00E-15 | 1.44E-14 | 24.22637427 |
| MCUR1   | -0.542928155 | 4.77913178 | -8.464107297 | 2.01E-15 | 1.45E-14 | 24.21913703 |
| FBXO44  | -0.486167972 | 5.10980358 | -8.463495693 | 2.02E-15 | 1.45E-14 | 24.21509712 |

|         |              |            |              |          |          |             |
|---------|--------------|------------|--------------|----------|----------|-------------|
| LMNTD2  | -0.69058873  | 1.84070626 | -8.459776391 | 2.07E-15 | 1.49E-14 | 24.19053304 |
| AGL     | -0.656486886 | 3.53302581 | -8.458064567 | 2.10E-15 | 1.51E-14 | 24.17922935 |
| PRKAG2  | -0.466790357 | 3.48093388 | -8.45748089  | 2.11E-15 | 1.51E-14 | 24.17537545 |
| HIST2H2 | -1.006789044 | 5.03758258 | -8.457171947 | 2.11E-15 | 1.51E-14 | 24.17333563 |
| APEH    | -0.541671478 | 6.48678412 | -8.456104496 | 2.12E-15 | 1.52E-14 | 24.166288   |
| TRAF2   | -0.454457037 | 4.37318084 | -8.450327558 | 2.21E-15 | 1.58E-14 | 24.1281556  |
| OXLD1   | -0.575938004 | 5.21317082 | -8.449400865 | 2.22E-15 | 1.59E-14 | 24.12204005 |
| SLC27A6 | 2.502953265  | 3.87994355 | 8.448545925  | 2.24E-15 | 1.60E-14 | 24.11639836 |
| BEND5   | -0.673168238 | 3.45217875 | -8.444790796 | 2.29E-15 | 1.64E-14 | 24.0916223  |
| STAMPB  | -0.4550643   | 4.03631865 | -8.442833903 | 2.32E-15 | 1.66E-14 | 24.07871332 |
| CLBA1   | -0.608271391 | 4.07050656 | -8.441818216 | 2.34E-15 | 1.67E-14 | 24.07201383 |
| FBXO4   | -0.495472646 | 3.85128372 | -8.440608683 | 2.36E-15 | 1.69E-14 | 24.06403633 |
| DNAJC3  | -0.808093673 | 5.96882568 | -8.439300474 | 2.38E-15 | 1.70E-14 | 24.05540872 |
| DDX49   | -0.439159685 | 5.54839487 | -8.437652457 | 2.40E-15 | 1.72E-14 | 24.04454116 |
| UCK1    | -0.455087858 | 5.74562248 | -8.436210067 | 2.43E-15 | 1.73E-14 | 24.03503055 |
| TMEM9   | -0.59299329  | 6.61379585 | -8.435729992 | 2.44E-15 | 1.74E-14 | 24.03186531 |
| GNMT    | -0.717569253 | 1.57291065 | -8.435423958 | 2.44E-15 | 1.74E-14 | 24.02984761 |
| MTFR1   | -0.561479117 | 3.10288841 | -8.434413129 | 2.46E-15 | 1.75E-14 | 24.02318346 |
| ZMAT2   | -0.529091229 | 7.18971328 | -8.433886556 | 2.47E-15 | 1.76E-14 | 24.01971207 |
| PSENN   | -0.529977279 | 6.40655664 | -8.432519243 | 2.49E-15 | 1.77E-14 | 24.01069873 |
| PELO    | -0.568859298 | 4.16290317 | -8.432130981 | 2.49E-15 | 1.78E-14 | 24.00813946 |
| OSBPL1  | -0.686553298 | 3.57666298 | -8.430531982 | 2.52E-15 | 1.80E-14 | 23.99760017 |
| BBOF1   | -0.636135881 | 3.33733564 | -8.430107517 | 2.53E-15 | 1.80E-14 | 23.99480264 |
| NGRN    | -0.659853286 | 4.3124599  | -8.429650338 | 2.54E-15 | 1.81E-14 | 23.99178957 |
| IFI27L1 | -0.496951756 | 3.22340397 | -8.426769863 | 2.59E-15 | 1.84E-14 | 23.97280781 |
| ELMOD2  | -0.498299432 | 3.94337128 | -8.426619182 | 2.59E-15 | 1.84E-14 | 23.97181495 |
| ZBTB22  | -0.483655881 | 5.69166003 | -8.424155863 | 2.63E-15 | 1.87E-14 | 23.95558522 |
| ICAM1   | 1.440901937  | 5.64806075 | 8.423662223  | 2.64E-15 | 1.88E-14 | 23.95233317 |
| CAMK2G  | -0.489605215 | 3.62795448 | -8.423414786 | 2.64E-15 | 1.88E-14 | 23.95070311 |
| UBTF    | -0.484955147 | 6.2712044  | -8.423389687 | 2.64E-15 | 1.88E-14 | 23.95053777 |
| STIP1   | -0.490035253 | 6.1281303  | -8.422839051 | 2.65E-15 | 1.88E-14 | 23.94691042 |
| SERPINI | -0.600096527 | 3.36308322 | -8.42195827  | 2.67E-15 | 1.89E-14 | 23.9411085  |
| MRPL4   | -0.490535502 | 4.98292993 | -8.420870896 | 2.69E-15 | 1.91E-14 | 23.93394618 |
| ZNF536  | -0.708273141 | 0.54018804 | -8.419612408 | 2.71E-15 | 1.92E-14 | 23.92565741 |
| ARPC1A  | -0.404888066 | 7.21132277 | -8.417087695 | 2.76E-15 | 1.95E-14 | 23.90903103 |
| EXOSC1  | -0.327881921 | 4.56282418 | -8.416955172 | 2.76E-15 | 1.96E-14 | 23.90815838 |
| SNRPD3  | -0.45075722  | 6.60602304 | -8.416479451 | 2.77E-15 | 1.96E-14 | 23.90502588 |
| ATP6V1E | -0.470762336 | 2.02842311 | -8.415988019 | 2.78E-15 | 1.97E-14 | 23.90179003 |
| TUBA8   | -0.190108474 | 0.23918498 | -8.414607417 | 2.80E-15 | 1.98E-14 | 23.8927     |
| FAM117A | -0.61966775  | 4.5324534  | -8.412383576 | 2.85E-15 | 2.01E-14 | 23.87805977 |



|         |              |            |              |          |          |             |
|---------|--------------|------------|--------------|----------|----------|-------------|
| GABRB2  | 1.951939606  | 3.55672845 | 8.411866661  | 2.86E-15 | 2.02E-14 | 23.87465707 |
| XK      | -0.724594492 | 1.3051963  | -8.411171153 | 2.87E-15 | 2.03E-14 | 23.87007893 |
| SOX12   | -0.582462024 | 4.32336523 | -8.407093332 | 2.95E-15 | 2.08E-14 | 23.84324123 |
| ALDH1B1 | -0.876190348 | 4.52366124 | -8.40664852  | 2.96E-15 | 2.09E-14 | 23.8403142  |
| AJM1    | -0.61896795  | 1.95461981 | -8.406128847 | 2.97E-15 | 2.09E-14 | 23.83689466 |
| INTS13  | -0.45245274  | 4.08317603 | -8.406030362 | 2.97E-15 | 2.09E-14 | 23.83624663 |
| AP3M2   | -0.497693397 | 3.42556352 | -8.404923674 | 2.99E-15 | 2.11E-14 | 23.82896488 |
| MED10   | -0.47577644  | 5.05853136 | -8.402994529 | 3.03E-15 | 2.14E-14 | 23.81627285 |
| DUSP12  | -0.530359219 | 4.37850634 | -8.40221549  | 3.05E-15 | 2.15E-14 | 23.81114795 |
| SUCLG2  | -0.553132626 | 6.05656708 | -8.399417563 | 3.10E-15 | 2.19E-14 | 23.79274402 |
| AQP11   | -0.476358291 | 1.93828965 | -8.392116284 | 3.26E-15 | 2.29E-14 | 23.74473473 |
| RBM20   | -0.57388982  | 0.79796561 | -8.391236573 | 3.28E-15 | 2.31E-14 | 23.73895182 |
| PTPN18  | -0.419134059 | 4.91177827 | -8.390604763 | 3.29E-15 | 2.32E-14 | 23.73479874 |
| TMEM10  | -0.598515954 | 6.99087876 | -8.389766415 | 3.31E-15 | 2.33E-14 | 23.72928828 |
| ZRANB3  | -0.388950598 | 1.46890936 | -8.389396318 | 3.32E-15 | 2.33E-14 | 23.72685574 |
| B3GAT3  | -0.518948812 | 5.83276794 | -8.389110587 | 3.33E-15 | 2.34E-14 | 23.72497775 |
| DTYMK   | -0.496522161 | 4.39236406 | -8.387171943 | 3.37E-15 | 2.36E-14 | 23.71223683 |
| INHBC   | -0.488235865 | 0.50379434 | -8.384578198 | 3.43E-15 | 2.41E-14 | 23.69519315 |
| FUT3    | 0.812918522  | 0.84356187 | 8.384131799  | 3.44E-15 | 2.41E-14 | 23.69226013 |
| TIFA    | -0.634318458 | 3.91225889 | -8.380607407 | 3.52E-15 | 2.47E-14 | 23.66910658 |
| HES2    | 0.5866207    | 0.71487028 | 8.380418539  | 3.52E-15 | 2.47E-14 | 23.66786596 |
| PSMB3   | -0.462381318 | 8.00350646 | -8.375638174 | 3.64E-15 | 2.55E-14 | 23.63647053 |
| LRRN2   | -1.128347569 | 2.42605112 | -8.372652753 | 3.71E-15 | 2.60E-14 | 23.61686868 |
| LUC7L2  | -0.501992847 | 4.7627526  | -8.371978608 | 3.73E-15 | 2.61E-14 | 23.61244289 |
| MTA3    | -0.417507176 | 3.31673867 | -8.371506881 | 3.74E-15 | 2.62E-14 | 23.60934611 |
| RANBP1  | -0.628400375 | 3.25851624 | -8.3702271   | 3.77E-15 | 2.64E-14 | 23.60094512 |
| MMRN2   | -0.795786889 | 4.73336863 | -8.369209206 | 3.80E-15 | 2.65E-14 | 23.59426378 |
| KCTD6   | -0.488199175 | 3.29380264 | -8.369156825 | 3.80E-15 | 2.65E-14 | 23.59391998 |
| AAAS    | -0.419084901 | 4.8195966  | -8.368794058 | 3.81E-15 | 2.66E-14 | 23.59153894 |
| DRG1    | -0.465097482 | 6.17837544 | -8.368559662 | 3.81E-15 | 2.66E-14 | 23.59000049 |
| TTI2    | -0.425656203 | 2.86477537 | -8.366992872 | 3.85E-15 | 2.69E-14 | 23.57971763 |
| RCBTB2  | -0.614054544 | 4.95975341 | -8.365904694 | 3.88E-15 | 2.71E-14 | 23.57257655 |
| PPP2R5I | -0.449011855 | 5.24636298 | -8.365387954 | 3.90E-15 | 2.72E-14 | 23.56918566 |
| MAGED1  | -0.675182378 | 6.89172051 | -8.364952344 | 3.91E-15 | 2.72E-14 | 23.56632725 |
| SPECC1  | -0.486963543 | 4.2273914  | -8.363163455 | 3.95E-15 | 2.75E-14 | 23.55458971 |
| SEC22A  | -0.461913829 | 3.47141671 | -8.361719257 | 3.99E-15 | 2.78E-14 | 23.54511485 |
| TACSTD  | 2.838594727  | 6.89952483 | 8.361534725  | 4.00E-15 | 2.78E-14 | 23.54390427 |
| DHRS13  | -0.535157082 | 1.95225856 | -8.360414073 | 4.03E-15 | 2.80E-14 | 23.53655281 |
| SYT12   | 2.154496384  | 2.86921599 | 8.358768521  | 4.07E-15 | 2.83E-14 | 23.52575904 |
| ALKBH2  | -0.453701384 | 4.01683429 | -8.357863539 | 4.10E-15 | 2.85E-14 | 23.51982345 |

|        |              |            |              |          |          |             |
|--------|--------------|------------|--------------|----------|----------|-------------|
| MAP2K5 | -0.536429977 | 3.63988788 | -8.355839382 | 4.15E-15 | 2.89E-14 | 23.50654874 |
| CCDC36 | -0.256541233 | 0.44785704 | -8.355685674 | 4.16E-15 | 2.89E-14 | 23.50554078 |
| ZNF717 | -0.399742466 | 2.09513286 | -8.35337947  | 4.22E-15 | 2.93E-14 | 23.49041876 |
| SMPD2  | -0.441000512 | 4.4317484  | -8.352564065 | 4.24E-15 | 2.95E-14 | 23.48507264 |
| EPM2A  | -0.448813227 | 2.07936591 | -8.352384903 | 4.25E-15 | 2.95E-14 | 23.48389802 |
| POPDC2 | -0.644691601 | 2.62611681 | -8.351703032 | 4.27E-15 | 2.96E-14 | 23.47942768 |
| SETD3  | -0.496722703 | 5.84144472 | -8.350472829 | 4.30E-15 | 2.98E-14 | 23.471363   |
| MAP4K2 | -0.498063356 | 3.26380727 | -8.34900412  | 4.34E-15 | 3.01E-14 | 23.46173568 |
| ST7L   | -0.39460718  | 2.38701845 | -8.348623913 | 4.36E-15 | 3.02E-14 | 23.45924359 |
| STARD1 | -0.852060505 | 3.57538268 | -8.347422414 | 4.39E-15 | 3.04E-14 | 23.45136874 |
| MRPS16 | -0.398527392 | 6.0352581  | -8.34701375  | 4.40E-15 | 3.05E-14 | 23.44869042 |
| RND2   | -1.173264251 | 3.84366929 | -8.345043871 | 4.46E-15 | 3.09E-14 | 23.43578122 |
| CLN3   | -0.374782284 | 2.87233386 | -8.344953267 | 4.46E-15 | 3.09E-14 | 23.43518751 |
| CCL22  | 1.224572535  | 1.66171491 | 8.344588472  | 4.47E-15 | 3.09E-14 | 23.4327971  |
| PYURF  | -0.558457036 | 2.86291134 | -8.34305896  | 4.52E-15 | 3.12E-14 | 23.42277526 |
| HYLS1  | -0.387410295 | 2.0055275  | -8.34269501  | 4.53E-15 | 3.13E-14 | 23.4203907  |
| ATG4B  | -0.496242566 | 4.5734755  | -8.339758164 | 4.62E-15 | 3.19E-14 | 23.40115099 |
| NELFE  | -0.395601153 | 6.29157391 | -8.336318117 | 4.73E-15 | 3.26E-14 | 23.37861965 |
| PDE2A  | -0.866375108 | 2.84342763 | -8.335413819 | 4.76E-15 | 3.28E-14 | 23.37269763 |
| CYYR1  | -0.808071953 | 4.32851347 | -8.335080949 | 4.77E-15 | 3.29E-14 | 23.37051785 |
| TARDBP | -0.424622502 | 5.6929776  | -8.334106011 | 4.80E-15 | 3.31E-14 | 23.36413379 |
| MTFMT  | -0.414170232 | 3.26162063 | -8.33247782  | 4.85E-15 | 3.34E-14 | 23.35347306 |
| DMTN   | -0.552693205 | 5.49279299 | -8.331534705 | 4.88E-15 | 3.36E-14 | 23.34729848 |
| MAGIX  | -0.542033245 | 2.68259385 | -8.328748393 | 4.97E-15 | 3.42E-14 | 23.32905879 |
| CCDC24 | -0.633592365 | 4.22048532 | -8.327751347 | 5.00E-15 | 3.44E-14 | 23.3225328  |
| NAT9   | -0.488721616 | 4.73542216 | -8.32753436  | 5.01E-15 | 3.45E-14 | 23.32111261 |
| WDR83  | -0.52563821  | 3.65297729 | -8.326875986 | 5.03E-15 | 3.46E-14 | 23.31680365 |
| CBWD2  | -0.479771889 | 2.49870115 | -8.325590078 | 5.08E-15 | 3.49E-14 | 23.30838813 |
| SMIM10 | -0.742540908 | 3.03396306 | -8.325425054 | 5.08E-15 | 3.49E-14 | 23.3073082  |
| SCP2   | -0.576554649 | 5.50261094 | -8.325423983 | 5.08E-15 | 3.49E-14 | 23.30730119 |
| SH3BGR | -0.535083255 | 7.37836112 | -8.323708774 | 5.14E-15 | 3.53E-14 | 23.29607743 |
| FAM3D  | -0.749222195 | 1.45397783 | -8.323023544 | 5.16E-15 | 3.54E-14 | 23.29159388 |
| POLI   | -0.685345379 | 3.28157522 | -8.322216769 | 5.19E-15 | 3.56E-14 | 23.28631532 |
| EHHADH | -0.604760859 | 3.07434199 | -8.321651519 | 5.21E-15 | 3.57E-14 | 23.28261718 |
| PAX8   | -0.781317928 | 8.4577054  | -8.320098236 | 5.26E-15 | 3.61E-14 | 23.27245559 |
| LPGAT1 | -0.674877861 | 4.80380579 | -8.319483965 | 5.29E-15 | 3.62E-14 | 23.26843732 |
| FAM98C | -0.478690877 | 3.75237855 | -8.315833779 | 5.42E-15 | 3.71E-14 | 23.24456306 |
| KDELR2 | -0.531531816 | 7.38003434 | -8.31505394  | 5.44E-15 | 3.73E-14 | 23.23946326 |
| HKDC1  | -1.202372408 | 2.23896065 | -8.314665462 | 5.46E-15 | 3.74E-14 | 23.23692288 |
| MKRN2  | -0.534800497 | 5.14571494 | -8.314519554 | 5.46E-15 | 3.74E-14 | 23.23596876 |

|         |              |            |              |          |          |             |
|---------|--------------|------------|--------------|----------|----------|-------------|
| ZCWPW   | -0.415310677 | 1.4833715  | -8.313420752 | 5.50E-15 | 3.76E-14 | 23.2287838  |
| NIPSNAF | -0.527468878 | 4.585998   | -8.311324069 | 5.58E-15 | 3.81E-14 | 23.21507531 |
| DNAH7   | -0.382733871 | 0.7733846  | -8.31127135  | 5.58E-15 | 3.81E-14 | 23.21473066 |
| RPP40   | -0.419143729 | 2.55211873 | -8.310476598 | 5.61E-15 | 3.83E-14 | 23.20953496 |
| HPSE    | 0.883425767  | 1.90898108 | 8.310452241  | 5.61E-15 | 3.83E-14 | 23.20937573 |
| PLCD3   | 1.499157512  | 5.18664697 | 8.310101084  | 5.63E-15 | 3.84E-14 | 23.20708014 |
| NOVA2   | -0.591466449 | 1.7724753  | -8.310086221 | 5.63E-15 | 3.84E-14 | 23.20698297 |
| NABP1   | 0.676478475  | 1.28598346 | 8.309846958  | 5.64E-15 | 3.84E-14 | 23.20541889 |
| CNTN5   | -0.630143073 | 0.57290817 | -8.303260303 | 5.89E-15 | 4.01E-14 | 23.16237145 |
| MRPL3   | -0.49335791  | 6.35328716 | -8.301531578 | 5.96E-15 | 4.06E-14 | 23.15107651 |
| ACSM5   | -0.813377133 | 1.73808238 | -8.296505602 | 6.16E-15 | 4.19E-14 | 23.11824607 |
| SH3BP5I | -0.510723492 | 4.03954307 | -8.29489267  | 6.22E-15 | 4.24E-14 | 23.10771257 |
| ARHGEF  | -0.780552065 | 3.62118446 | -8.290597185 | 6.40E-15 | 4.36E-14 | 23.07966599 |
| EVA1A   | 1.530026168  | 3.5835354  | 8.290295275  | 6.42E-15 | 4.36E-14 | 23.07769503 |
| AVPR2   | -0.708568008 | 1.50443672 | -8.290252237 | 6.42E-15 | 4.36E-14 | 23.07741408 |
| LARS2   | -0.602091988 | 3.6469961  | -8.287958921 | 6.52E-15 | 4.43E-14 | 23.06244407 |
| GDPGP1  | -0.36943275  | 2.12512564 | -8.287167354 | 6.55E-15 | 4.45E-14 | 23.05727753 |
| ASPSCR  | -0.471762583 | 3.39778555 | -8.287137873 | 6.55E-15 | 4.45E-14 | 23.05708512 |
| EML2    | -0.530685756 | 4.77591026 | -8.286846237 | 6.56E-15 | 4.46E-14 | 23.05518169 |
| FITM2   | -0.759624898 | 3.71780179 | -8.284997418 | 6.65E-15 | 4.51E-14 | 23.04311588 |
| UBE2N   | -0.426305414 | 4.80721141 | -8.280814934 | 6.83E-15 | 4.63E-14 | 23.01582575 |
| EIF3J   | -0.499321708 | 5.54702147 | -8.279358196 | 6.90E-15 | 4.68E-14 | 23.0063226  |
| TAL1    | -0.656395144 | 1.62106504 | -8.278826371 | 6.92E-15 | 4.69E-14 | 23.00285343 |
| ZDHHC1  | -0.493619825 | 1.5400447  | -8.27880334  | 6.92E-15 | 4.69E-14 | 23.00270321 |
| ENPP3   | -1.31884473  | 1.23856275 | -8.27821887  | 6.95E-15 | 4.71E-14 | 22.99889078 |
| USF2    | -0.435097352 | 6.43016858 | -8.277759623 | 6.97E-15 | 4.72E-14 | 22.99589528 |
| DBI     | -0.652922846 | 7.23730325 | -8.277026638 | 7.01E-15 | 4.74E-14 | 22.99111449 |
| GDPD1   | -0.634865721 | 2.38662943 | -8.275868974 | 7.06E-15 | 4.78E-14 | 22.98356429 |
| TIMM9   | -0.406825805 | 5.50473559 | -8.272994205 | 7.19E-15 | 4.87E-14 | 22.96481787 |
| GCNT2   | -0.627729467 | 1.52736928 | -8.272509201 | 7.22E-15 | 4.88E-14 | 22.96165552 |
| CEBPA   | -1.046633054 | 3.57420426 | -8.272318166 | 7.23E-15 | 4.88E-14 | 22.96040995 |
| TRAPPC  | -0.418687005 | 2.89583783 | -8.269854201 | 7.35E-15 | 4.96E-14 | 22.94434614 |
| TSSC4   | -0.485029891 | 5.4868692  | -8.265131932 | 7.58E-15 | 5.12E-14 | 22.91356703 |
| GRPEL2  | -0.402837096 | 3.30524438 | -8.264449479 | 7.61E-15 | 5.14E-14 | 22.90911973 |
| DNAJB2  | -0.508422034 | 6.44863587 | -8.263300722 | 7.67E-15 | 5.18E-14 | 22.90163418 |
| PPP1CA  | -0.467807717 | 7.6218579  | -8.260972713 | 7.79E-15 | 5.25E-14 | 22.8864662  |
| TADA2A  | -0.464550983 | 3.57248272 | -8.260587945 | 7.81E-15 | 5.27E-14 | 22.88395951 |
| RND1    | -0.955801222 | 2.70211021 | -8.260338003 | 7.82E-15 | 5.27E-14 | 22.88233122 |
| RBBP7   | -0.461848794 | 5.56011304 | -8.260185509 | 7.83E-15 | 5.28E-14 | 22.88133779 |
| CCDC30  | -0.444875518 | 1.5535598  | -8.259787237 | 7.85E-15 | 5.29E-14 | 22.87874327 |

|         |              |            |              |          |          |             |
|---------|--------------|------------|--------------|----------|----------|-------------|
| PGBD4   | -0.308859877 | 1.09521659 | -8.259266598 | 7.88E-15 | 5.30E-14 | 22.8753517  |
| GLMN    | -0.479133357 | 3.10278315 | -8.258768233 | 7.91E-15 | 5.32E-14 | 22.87210534 |
| KIN     | -0.417153009 | 2.85579964 | -8.257273379 | 7.98E-15 | 5.37E-14 | 22.86236853 |
| TXNRD3  | -0.473063416 | 2.93944716 | -8.25643147  | 8.03E-15 | 5.40E-14 | 22.85688516 |
| PIAS2   | -0.442346882 | 2.65994274 | -8.254256922 | 8.14E-15 | 5.47E-14 | 22.84272378 |
| SKIDA1  | -0.732006993 | 1.85101717 | -8.252573674 | 8.24E-15 | 5.53E-14 | 22.83176338 |
| SURF6   | -0.486128572 | 4.96932017 | -8.248373431 | 8.47E-15 | 5.69E-14 | 22.80441931 |
| TRIM58  | -1.296379434 | 2.86143879 | -8.247732596 | 8.50E-15 | 5.71E-14 | 22.80024811 |
| PIN4    | -0.483790733 | 4.38663115 | -8.247197727 | 8.53E-15 | 5.72E-14 | 22.79676679 |
| PKHD1L  | -1.955719311 | 2.19636957 | -8.247186269 | 8.53E-15 | 5.72E-14 | 22.79669221 |
| MPHOSF  | -0.439512698 | 3.79720246 | -8.246513531 | 8.57E-15 | 5.75E-14 | 22.79231372 |
| CCDC59  | -0.410600804 | 4.21203839 | -8.244895417 | 8.66E-15 | 5.81E-14 | 22.78178314 |
| ABCC8   | -1.408351022 | 1.58162321 | -8.244601696 | 8.68E-15 | 5.82E-14 | 22.77987174 |
| TMEM38  | -0.875161471 | 4.31920609 | -8.243105693 | 8.77E-15 | 5.87E-14 | 22.77013711 |
| DAP     | -0.572811709 | 7.79516874 | -8.241793174 | 8.84E-15 | 5.92E-14 | 22.76159727 |
| NES     | -0.966222217 | 4.8922461  | -8.241657147 | 8.85E-15 | 5.92E-14 | 22.76071226 |
| PPP2R5  | -0.538850731 | 5.91921644 | -8.241113107 | 8.88E-15 | 5.94E-14 | 22.75717275 |
| TECTA   | -0.339752052 | 0.78906534 | -8.240723786 | 8.91E-15 | 5.95E-14 | 22.75463993 |
| TSNAXIF | -0.480841521 | 0.6551535  | -8.240122276 | 8.94E-15 | 5.98E-14 | 22.75072679 |
| TMEM17  | -0.507017289 | 6.74447616 | -8.239596408 | 8.97E-15 | 5.99E-14 | 22.74730588 |
| MAPK4   | -1.143140208 | 1.19198743 | -8.239395606 | 8.99E-15 | 6.00E-14 | 22.74599964 |
| CCDC11  | -0.467670784 | 5.60924147 | -8.238540682 | 9.04E-15 | 6.03E-14 | 22.74043848 |
| APMAP   | -0.691158508 | 8.66216974 | -8.237404525 | 9.10E-15 | 6.07E-14 | 22.73304845 |
| CFAP43  | -0.591694227 | 1.2949659  | -8.236285686 | 9.17E-15 | 6.12E-14 | 22.72577164 |
| SACM1L  | -0.578756006 | 4.72571463 | -8.235846147 | 9.20E-15 | 6.13E-14 | 22.72291309 |
| GCK     | -0.614636756 | 0.54888609 | -8.234063693 | 9.31E-15 | 6.20E-14 | 22.71132174 |
| TCEA3   | -0.583175659 | 6.0839973  | -8.232146091 | 9.43E-15 | 6.28E-14 | 22.69885315 |
| CCDC12  | -0.468934854 | 6.644089   | -8.232085897 | 9.43E-15 | 6.28E-14 | 22.69846178 |
| CDC14B  | -0.688298364 | 3.21347314 | -8.231324867 | 9.48E-15 | 6.31E-14 | 22.69351391 |
| NDUFA7  | -0.556965625 | 3.00426908 | -8.230600791 | 9.52E-15 | 6.34E-14 | 22.68880655 |
| EDNRB   | -1.262463443 | 4.53507904 | -8.230283197 | 9.54E-15 | 6.35E-14 | 22.68674189 |
| NDUFA1  | -0.658400592 | 5.66225245 | -8.227466122 | 9.72E-15 | 6.46E-14 | 22.66843021 |
| PGGT1B  | -0.466176746 | 2.89349915 | -8.223119306 | 1.00E-14 | 6.65E-14 | 22.64018199 |
| GADD45  | -1.072777871 | 4.11615296 | -8.222951802 | 1.00E-14 | 6.65E-14 | 22.63909361 |
| TRIM39  | -0.428091383 | 3.88886485 | -8.222619964 | 1.00E-14 | 6.67E-14 | 22.63693751 |
| FBXL22  | -0.538016808 | 1.60645417 | -8.222368938 | 1.01E-14 | 6.67E-14 | 22.63530652 |
| NSF     | -0.509187962 | 4.58979545 | -8.221378149 | 1.01E-14 | 6.72E-14 | 22.62886933 |
| CCDC15  | -0.448080482 | 4.22365468 | -8.220453311 | 1.02E-14 | 6.75E-14 | 22.62286103 |
| HSPA12i | -0.701770519 | 3.33907097 | -8.2194376   | 1.03E-14 | 6.80E-14 | 22.61626282 |
| SMPD1   | -0.553646692 | 6.35836731 | -8.218982226 | 1.03E-14 | 6.81E-14 | 22.61330479 |

|           |              |            |              |          |          |             |
|-----------|--------------|------------|--------------|----------|----------|-------------|
| SUMF2     | -0.665934124 | 6.85806135 | -8.217766948 | 1.04E-14 | 6.87E-14 | 22.60541104 |
| ITGA1     | -0.767739217 | 3.17037909 | -8.21766208  | 1.04E-14 | 6.87E-14 | 22.60472991 |
| SAXO2     | -0.479992032 | 1.09278305 | -8.217344452 | 1.04E-14 | 6.88E-14 | 22.6026669  |
| PIGU      | -0.468333922 | 5.05215083 | -8.213181408 | 1.07E-14 | 7.07E-14 | 22.57563208 |
| RNLS      | -0.498801358 | 3.47513597 | -8.213172513 | 1.07E-14 | 7.07E-14 | 22.57557433 |
| RFT1      | -0.430838683 | 3.82183843 | -8.21130852  | 1.08E-14 | 7.15E-14 | 22.56347215 |
| VGLL1     | 1.20310091   | 1.22270836 | 8.208803645  | 1.10E-14 | 7.27E-14 | 22.54721148 |
| FASTKD1   | -0.531368927 | 3.96965958 | -8.208053617 | 1.10E-14 | 7.30E-14 | 22.54234314 |
| ANKRD3    | -0.3743521   | 2.56594359 | -8.207458155 | 1.11E-14 | 7.33E-14 | 22.53847827 |
| BCAS3     | -0.476826742 | 2.68230492 | -8.204992655 | 1.13E-14 | 7.44E-14 | 22.52247754 |
| TNFSF18   | 0.885756641  | 1.04529468 | 8.204118699  | 1.13E-14 | 7.48E-14 | 22.51680638 |
| VPS37D    | -0.611406151 | 3.07395784 | -8.203737754 | 1.14E-14 | 7.50E-14 | 22.5143345  |
| HNRNPA2B1 | -0.467564064 | 7.8889162  | -8.202988871 | 1.14E-14 | 7.53E-14 | 22.50947535 |
| PFDN5     | -0.501493998 | 8.35043997 | -8.201563465 | 1.15E-14 | 7.60E-14 | 22.50022727 |
| KLK7      | 2.675342995  | 3.54448403 | 8.20006574   | 1.16E-14 | 7.67E-14 | 22.49051099 |
| TMEM183C  | -0.5108152   | 3.9825265  | -8.198651268 | 1.18E-14 | 7.74E-14 | 22.48133576 |
| ATG13     | -0.478536157 | 5.28519067 | -8.197769988 | 1.18E-14 | 7.79E-14 | 22.47561963 |
| ZNF582    | -0.442182678 | 2.8122325  | -8.197135571 | 1.19E-14 | 7.82E-14 | 22.47150492 |
| SUSD5     | -1.034266481 | 2.14352286 | -8.196784167 | 1.19E-14 | 7.83E-14 | 22.46922586 |
| NENF      | -0.554713965 | 6.96140754 | -8.196006991 | 1.20E-14 | 7.87E-14 | 22.46418562 |
| PCMT1     | -0.575463664 | 6.20501935 | -8.194321191 | 1.21E-14 | 7.95E-14 | 22.45325363 |
| PYROXD1   | -0.802256119 | 3.48368827 | -8.193586475 | 1.22E-14 | 7.99E-14 | 22.44848958 |
| LAMTOR2   | -0.448718574 | 5.29394691 | -8.192835776 | 1.22E-14 | 8.02E-14 | 22.44362216 |
| PSMD13    | -0.406139056 | 5.93709604 | -8.191046402 | 1.24E-14 | 8.12E-14 | 22.43202116 |
| AGMAT     | -0.611057671 | 1.62120736 | -8.190522245 | 1.24E-14 | 8.14E-14 | 22.42862319 |
| CCDC121   | -0.612021013 | 2.9966004  | -8.187815343 | 1.26E-14 | 8.28E-14 | 22.41107708 |
| PPP1R15B  | -0.601071822 | 4.82535862 | -8.185466472 | 1.28E-14 | 8.41E-14 | 22.39585446 |
| TRA2B     | -0.518515688 | 4.87229868 | -8.183436787 | 1.30E-14 | 8.52E-14 | 22.38270248 |
| TBC1D4    | -0.934305139 | 3.9228405  | -8.182867942 | 1.30E-14 | 8.55E-14 | 22.37901681 |
| NOD1      | 1.369086993  | 4.26045506 | 8.17994154   | 1.33E-14 | 8.71E-14 | 22.36005839 |
| RIOK1     | -0.473457494 | 3.83326127 | -8.177056542 | 1.36E-14 | 8.87E-14 | 22.34137208 |
| TSPAN3    | -0.55482533  | 5.22621018 | -8.176485946 | 1.36E-14 | 8.90E-14 | 22.33767675 |
| 9-Mar     | -0.417631131 | 4.61487069 | -8.176297758 | 1.36E-14 | 8.91E-14 | 22.33645803 |
| DNAJC5    | -0.50947042  | 6.13758999 | -8.175201989 | 1.37E-14 | 8.97E-14 | 22.32936206 |
| ADRM1     | -0.406398722 | 6.79788659 | -8.174925079 | 1.37E-14 | 8.99E-14 | 22.32756894 |
| SQLE      | -0.677202575 | 3.34476638 | -8.174536285 | 1.38E-14 | 9.01E-14 | 22.32505137 |
| SSNA1     | -0.476728809 | 6.78681899 | -8.172060434 | 1.40E-14 | 9.15E-14 | 22.30902109 |
| NDUFAF3   | -0.436668664 | 6.86047098 | -8.167845961 | 1.44E-14 | 9.40E-14 | 22.28174035 |
| LDLR      | 1.27334161   | 2.92512225 | 8.167268793  | 1.45E-14 | 9.44E-14 | 22.27800492 |
| LOX       | 1.346308673  | 3.01643838 | 8.166056671  | 1.46E-14 | 9.51E-14 | 22.27016057 |

|         |              |            |              |          |          |             |
|---------|--------------|------------|--------------|----------|----------|-------------|
| MUC21   | 1.881527901  | 2.32646772 | 8.161664299  | 1.50E-14 | 9.78E-14 | 22.24174068 |
| ACSL3   | -0.642872831 | 5.03552829 | -8.160685796 | 1.51E-14 | 9.84E-14 | 22.2354107  |
| STC2    | -0.929540812 | 2.7003788  | -8.158863212 | 1.53E-14 | 9.96E-14 | 22.22362152 |
| INAVA   | 0.992339788  | 1.0596895  | 8.15720175   | 1.54E-14 | 1.01E-13 | 22.21287587 |
| HSPBAP  | -0.372832721 | 2.83143045 | -8.156888622 | 1.55E-14 | 1.01E-13 | 22.21085084 |
| GZF1    | -0.523701703 | 3.34316195 | -8.155160563 | 1.57E-14 | 1.02E-13 | 22.19967609 |
| SFN     | 2.21212315   | 4.39433673 | 8.153705204  | 1.58E-14 | 1.03E-13 | 22.19026587 |
| USE1    | -0.492828698 | 4.94963627 | -8.152562173 | 1.59E-14 | 1.04E-13 | 22.18287582 |
| EAPP    | -0.510447678 | 6.11005402 | -8.152294969 | 1.59E-14 | 1.04E-13 | 22.18114836 |
| SLC39A5 | -0.551572761 | 4.96299501 | -8.149991565 | 1.62E-14 | 1.05E-13 | 22.16625828 |
| SAR1A   | -0.487261949 | 5.6322189  | -8.149682245 | 1.62E-14 | 1.05E-13 | 22.1642589  |
| NGEF    | 1.806112235  | 3.71432067 | 8.14949185   | 1.62E-14 | 1.06E-13 | 22.16302826 |
| SPATA5  | -0.465279784 | 3.09173051 | -8.14824899  | 1.64E-14 | 1.06E-13 | 22.15499525 |
| BMP8B   | -0.876261834 | 2.68321307 | -8.146520148 | 1.66E-14 | 1.08E-13 | 22.14382237 |
| SCD     | 1.188706402  | 3.43255489 | 8.146320144  | 1.66E-14 | 1.08E-13 | 22.14252991 |
| LDAH    | -0.531364468 | 3.04650944 | -8.144649608 | 1.68E-14 | 1.09E-13 | 22.13173532 |
| CAPZB   | -0.401399976 | 7.66477498 | -8.143497436 | 1.69E-14 | 1.10E-13 | 22.12429104 |
| NOL4    | -0.678947801 | 0.5240393  | -8.139505278 | 1.73E-14 | 1.12E-13 | 22.09850211 |
| TOMM70  | -0.464468156 | 5.46456005 | -8.139444875 | 1.74E-14 | 1.12E-13 | 22.09811197 |
| CRCP    | -0.505397281 | 5.19920783 | -8.138746966 | 1.74E-14 | 1.13E-13 | 22.09360433 |
| P2RX5-T | -0.1849368   | 0.45631398 | -8.137109544 | 1.76E-14 | 1.14E-13 | 22.08302948 |
| FCHO1   | 0.903771317  | 1.53940793 | 8.136962235  | 1.76E-14 | 1.14E-13 | 22.08207819 |
| UBAC2   | -0.456243107 | 5.79051233 | -8.136617963 | 1.77E-14 | 1.14E-13 | 22.07985498 |
| KLHL23  | -0.750128745 | 3.03822839 | -8.136266864 | 1.77E-14 | 1.15E-13 | 22.07758775 |
| TACC2   | -0.709779448 | 3.63125586 | -8.135448293 | 1.78E-14 | 1.15E-13 | 22.07230202 |
| OR2T8   | -0.596520868 | 0.7948609  | -8.134653818 | 1.79E-14 | 1.16E-13 | 22.06717218 |
| MRPL44  | -0.487248703 | 5.27055023 | -8.133513188 | 1.80E-14 | 1.17E-13 | 22.05980777 |
| PTGES3  | -0.297209134 | 0.52266097 | -8.131313681 | 1.83E-14 | 1.18E-13 | 22.0456085  |
| SLC45A4 | -0.671127522 | 3.45568149 | -8.131059234 | 1.83E-14 | 1.18E-13 | 22.04396602 |
| DHX35   | -0.482730375 | 2.98706444 | -8.1305805   | 1.84E-14 | 1.19E-13 | 22.04087584 |
| GATM    | -1.158252278 | 3.7249661  | -8.130471524 | 1.84E-14 | 1.19E-13 | 22.04017241 |
| MRFAP1  | -0.447061005 | 6.77717285 | -8.130167541 | 1.84E-14 | 1.19E-13 | 22.0382103  |
| LBHD1   | -0.472827969 | 1.79761545 | -8.127068898 | 1.88E-14 | 1.21E-13 | 22.01821201 |
| DZANK1  | -0.551909987 | 2.0657264  | -8.126807064 | 1.89E-14 | 1.21E-13 | 22.01652236 |
| RNF8    | -0.373537002 | 2.95882264 | -8.1259987   | 1.90E-14 | 1.22E-13 | 22.0113061  |
| UNC50   | -0.542147451 | 5.9780049  | -8.124645145 | 1.91E-14 | 1.23E-13 | 22.00257249 |
| PLGRKT  | -0.530952712 | 5.64051114 | -8.1226304   | 1.94E-14 | 1.25E-13 | 21.98957424 |
| CNNM2   | -0.469732966 | 2.28220823 | -8.118915364 | 1.99E-14 | 1.28E-13 | 21.96561142 |
| CCDC101 | -0.516972628 | 4.98315253 | -8.116463056 | 2.02E-14 | 1.30E-13 | 21.94979701 |
| MTMR11  | 0.958063142  | 2.84656619 | 8.114147876  | 2.05E-14 | 1.32E-13 | 21.9348695  |

|         |              |            |              |          |          |             |
|---------|--------------|------------|--------------|----------|----------|-------------|
| IER2    | -1.020485762 | 7.24612102 | -8.11327714  | 2.06E-14 | 1.32E-13 | 21.92925593 |
| SMARCA  | -0.448356739 | 3.97879784 | -8.112206988 | 2.07E-14 | 1.33E-13 | 21.92235723 |
| SDF2    | -0.512395791 | 5.7678873  | -8.111168905 | 2.09E-14 | 1.34E-13 | 21.91566578 |
| PSMA1   | -0.380203591 | 5.60626327 | -8.110797422 | 2.09E-14 | 1.34E-13 | 21.91327133 |
| LAYN    | -0.879414321 | 3.00453532 | -8.109758336 | 2.11E-14 | 1.35E-13 | 21.90657409 |
| RUNDC1  | -0.496019571 | 4.46455378 | -8.108502211 | 2.13E-14 | 1.36E-13 | 21.89847865 |
| STARD8  | -0.816846604 | 2.94805326 | -8.107530958 | 2.14E-14 | 1.37E-13 | 21.89221964 |
| FER1L6  | -0.715075635 | 0.46003953 | -8.106734053 | 2.15E-14 | 1.38E-13 | 21.88708451 |
| MTERF3  | -0.387417951 | 4.37551657 | -8.105202046 | 2.17E-14 | 1.39E-13 | 21.87721334 |
| SRSF8   | -0.496696059 | 5.78706223 | -8.10171732  | 2.22E-14 | 1.42E-13 | 21.85476432 |
| CLDN10  | 1.920099509  | 2.3187156  | 8.10115488   | 2.23E-14 | 1.43E-13 | 21.85114155 |
| HNRNPM  | -0.576271524 | 6.51409926 | -8.100783791 | 2.24E-14 | 1.43E-13 | 21.84875138 |
| UBE2F   | -0.418297129 | 4.68713318 | -8.100436794 | 2.24E-14 | 1.43E-13 | 21.84651645 |
| CNPY4   | -0.553533891 | 4.33483296 | -8.100226926 | 2.24E-14 | 1.43E-13 | 21.84516476 |
| MRPS27  | -0.476413551 | 5.05284402 | -8.099769813 | 2.25E-14 | 1.44E-13 | 21.84222073 |
| SLC25A1 | -0.407998008 | 4.30365018 | -8.098216863 | 2.27E-14 | 1.45E-13 | 21.8322197  |
| IL4I1   | 1.260169408  | 2.11956624 | 8.097636835  | 2.28E-14 | 1.46E-13 | 21.82848459 |
| ANXA9   | -0.725892432 | 5.48810203 | -8.097544803 | 2.28E-14 | 1.46E-13 | 21.82789196 |
| MRPS24  | -0.509272527 | 3.18948161 | -8.096537625 | 2.30E-14 | 1.47E-13 | 21.82140663 |
| CCDC13  | -0.506185405 | 3.02755241 | -8.09606694  | 2.31E-14 | 1.47E-13 | 21.818376   |
| ARSK    | -0.565595415 | 2.68828101 | -8.095772588 | 2.31E-14 | 1.47E-13 | 21.8164808  |
| QPRT    | -1.474719516 | 3.36972281 | -8.093634179 | 2.34E-14 | 1.49E-13 | 21.80271137 |
| MAOA    | -0.977700826 | 7.32223659 | -8.09355212  | 2.34E-14 | 1.49E-13 | 21.80218545 |
| MECR    | -0.392114516 | 3.97115498 | -8.091744376 | 2.37E-14 | 1.51E-13 | 21.79054892 |
| ZNF180  | -0.4960465   | 2.83965262 | -8.091660151 | 2.37E-14 | 1.51E-13 | 21.79000679 |
| PAK1IP1 | -0.496573436 | 4.59044966 | -8.089002218 | 2.41E-14 | 1.54E-13 | 21.77290046 |
| PAF1    | -0.440645448 | 6.79239628 | -8.088655777 | 2.42E-14 | 1.54E-13 | 21.77067102 |
| LEO1    | -0.54205052  | 4.77849224 | -8.086966185 | 2.45E-14 | 1.56E-13 | 21.75979888 |
| LRR1    | -0.395954146 | 2.79057634 | -8.08695829  | 2.45E-14 | 1.56E-13 | 21.75974808 |
| SYTL5   | 1.751813005  | 2.84022451 | 8.086076847  | 2.46E-14 | 1.56E-13 | 21.75407674 |
| ZNF544  | -0.421003264 | 3.63514121 | -8.084705621 | 2.48E-14 | 1.58E-13 | 21.74525477 |
| TEAD4   | -0.657291703 | 3.93769546 | -8.083576231 | 2.50E-14 | 1.59E-13 | 21.73798936 |
| GTF2H2  | -0.367349466 | 1.09485997 | -8.083138669 | 2.51E-14 | 1.59E-13 | 21.73517467 |
| ANKS3   | -0.542110938 | 3.03216714 | -8.08128859  | 2.54E-14 | 1.61E-13 | 21.72327471 |
| CATSPE  | -0.358821184 | 0.98170922 | -8.079144286 | 2.58E-14 | 1.63E-13 | 21.70948427 |
| IST1    | -0.431840534 | 5.68836278 | -8.071680103 | 2.70E-14 | 1.71E-13 | 21.66149755 |
| CREB5   | 0.941736881  | 1.75098902 | 8.071371572  | 2.71E-14 | 1.72E-13 | 21.65951459 |
| TP53I11 | -0.853414245 | 4.52282332 | -8.069876542 | 2.74E-14 | 1.73E-13 | 21.64990652 |
| TSNAX   | -0.469128998 | 4.28865284 | -8.069842002 | 2.74E-14 | 1.73E-13 | 21.64968455 |
| OGDH    | -0.57732048  | 6.74671832 | -8.06918211  | 2.75E-14 | 1.74E-13 | 21.64544399 |

|          |              |            |              |          |          |             |
|----------|--------------|------------|--------------|----------|----------|-------------|
| THAP9    | -0.561014461 | 2.67679173 | -8.066120366 | 2.80E-14 | 1.77E-13 | 21.62577146 |
| ARF4     | -0.572311901 | 7.66514586 | -8.063548369 | 2.85E-14 | 1.80E-13 | 21.6092491  |
| ALG12    | -0.668229014 | 3.39139439 | -8.0623932   | 2.87E-14 | 1.82E-13 | 21.60182938 |
| CACNA2   | -0.809696184 | 1.28116094 | -8.057773556 | 2.96E-14 | 1.87E-13 | 21.57216344 |
| PPM1G    | -0.381727239 | 6.30554536 | -8.057300508 | 2.97E-14 | 1.88E-13 | 21.56912624 |
| CAB39L   | -0.605166456 | 3.20723534 | -8.057238012 | 2.97E-14 | 1.88E-13 | 21.56872499 |
| RITA1    | -0.41285335  | 5.17587418 | -8.057141637 | 2.97E-14 | 1.88E-13 | 21.56810623 |
| CNBD2    | -0.107082016 | 0.21790773 | -8.056394116 | 2.99E-14 | 1.89E-13 | 21.56330705 |
| DIS3L2   | -0.406344489 | 3.10920368 | -8.055773353 | 3.00E-14 | 1.89E-13 | 21.55932187 |
| ITGAE    | -0.475844681 | 2.5434445  | -8.055191707 | 3.01E-14 | 1.90E-13 | 21.55558798 |
| EXOSC4   | -0.538544789 | 5.18700842 | -8.052413365 | 3.07E-14 | 1.93E-13 | 21.53775457 |
| FLAD1    | -0.37313344  | 4.85928241 | -8.049859003 | 3.12E-14 | 1.96E-13 | 21.52136205 |
| C8orf82  | -0.503362855 | 4.21678228 | -8.049517974 | 3.12E-14 | 1.97E-13 | 21.51917375 |
| DPF3     | -0.279149422 | 0.59884703 | -8.049124012 | 3.13E-14 | 1.97E-13 | 21.51664585 |
| BSG      | -0.442857413 | 9.30759476 | -8.047025339 | 3.18E-14 | 2.00E-13 | 21.50318074 |
| FAM151E  | -0.252219811 | 0.94970075 | -8.046256241 | 3.19E-14 | 2.01E-13 | 21.49824672 |
| PDLIM4   | 2.075525228  | 5.60633819 | 8.045600823  | 3.21E-14 | 2.02E-13 | 21.49404221 |
| ABHD8    | -0.468278027 | 5.03412901 | -8.045223822 | 3.21E-14 | 2.02E-13 | 21.49162385 |
| CPLANE   | -0.596332723 | 4.04416186 | -8.044876929 | 3.22E-14 | 2.02E-13 | 21.48939868 |
| ATP6AP2  | -0.575360256 | 8.23957002 | -8.043671929 | 3.25E-14 | 2.04E-13 | 21.48166955 |
| ABHD17I  | -0.584190049 | 3.5831866  | -8.042988711 | 3.26E-14 | 2.05E-13 | 21.47728756 |
| SSB      | -0.544979662 | 5.9735791  | -8.0415451   | 3.29E-14 | 2.07E-13 | 21.46802931 |
| RNF121   | -0.54089074  | 4.70227663 | -8.038613684 | 3.35E-14 | 2.11E-13 | 21.44923242 |
| ZKSCAN   | -0.434554924 | 3.01034663 | -8.03665094  | 3.40E-14 | 2.13E-13 | 21.43664915 |
| DDX59    | -0.503474917 | 3.40798634 | -8.03563447  | 3.42E-14 | 2.15E-13 | 21.43013323 |
| KLF15    | -0.890703117 | 2.60330225 | -8.035393927 | 3.43E-14 | 2.15E-13 | 21.42859133 |
| NAA60    | -0.431694674 | 4.05571698 | -8.033895083 | 3.46E-14 | 2.17E-13 | 21.41898428 |
| HNRNPA   | -0.509687798 | 6.9586413  | -8.032926311 | 3.48E-14 | 2.18E-13 | 21.41277537 |
| TNFRSF   | 1.141393006  | 2.08965849 | 8.030301472  | 3.54E-14 | 2.22E-13 | 21.39595488 |
| FBXL15   | -0.632355501 | 4.63155025 | -8.030044304 | 3.55E-14 | 2.22E-13 | 21.39430706 |
| GPANK1   | -0.472318638 | 4.35893737 | -8.028717547 | 3.58E-14 | 2.24E-13 | 21.38580635 |
| ING3     | -0.518690973 | 2.97319417 | -8.027867588 | 3.60E-14 | 2.25E-13 | 21.38036098 |
| TNFRSF   | -1.510013287 | 4.8699436  | -8.027334916 | 3.61E-14 | 2.26E-13 | 21.37694853 |
| TTC23    | -0.448536168 | 3.65357259 | -8.023723358 | 3.70E-14 | 2.31E-13 | 21.3538154  |
| ITGB4    | 1.164580915  | 4.92899293 | 8.02238104   | 3.73E-14 | 2.33E-13 | 21.34521902 |
| ING2     | -0.576204023 | 4.76755226 | -8.020896983 | 3.76E-14 | 2.35E-13 | 21.33571593 |
| GRHL3    | 1.052027236  | 1.89034361 | 8.019783847  | 3.79E-14 | 2.37E-13 | 21.3285887  |
| C16orf95 | -0.238152501 | 0.68285515 | -8.018049407 | 3.84E-14 | 2.39E-13 | 21.31748454 |
| CHRM3    | -0.66253496  | 1.19612849 | -8.017630505 | 3.85E-14 | 2.40E-13 | 21.31480288 |
| ADGRL4   | -0.759757652 | 4.70345901 | -8.014738226 | 3.92E-14 | 2.44E-13 | 21.29628982 |



|          |              |            |              |          |          |             |
|----------|--------------|------------|--------------|----------|----------|-------------|
| MRPL45   | -0.519015877 | 5.99318921 | -8.012016395 | 3.99E-14 | 2.49E-13 | 21.27887141 |
| CXorf40E | -0.521380088 | 3.92175455 | -8.011778641 | 3.99E-14 | 2.49E-13 | 21.27735007 |
| PDSS1    | -0.355084306 | 2.14208569 | -8.010651715 | 4.02E-14 | 2.51E-13 | 21.27013945 |
| TSPAN3   | -0.557993677 | 7.06906003 | -8.010396769 | 4.03E-14 | 2.51E-13 | 21.26850826 |
| MAD2L1I  | -0.467706321 | 4.87215379 | -8.010388814 | 4.03E-14 | 2.51E-13 | 21.26845737 |
| GABARA   | -0.530841351 | 6.00966133 | -8.009723459 | 4.05E-14 | 2.52E-13 | 21.26420047 |
| RNF10    | -0.381805091 | 6.4999289  | -8.00932612  | 4.06E-14 | 2.53E-13 | 21.26165842 |
| CHTOP    | -0.433227618 | 5.57875718 | -8.008813244 | 4.07E-14 | 2.53E-13 | 21.25837732 |
| CD1D     | -0.659567902 | 2.47549492 | -8.007011205 | 4.12E-14 | 2.56E-13 | 21.24684983 |
| DNAJB9   | -0.770619798 | 5.97124694 | -8.006195614 | 4.14E-14 | 2.57E-13 | 21.24163308 |
| ARHGEF   | -0.649985057 | 4.43886585 | -8.004685737 | 4.18E-14 | 2.60E-13 | 21.23197632 |
| TFAP2C   | 0.971231642  | 2.86800982 | 8.004317576  | 4.19E-14 | 2.60E-13 | 21.22962183 |
| WDR20    | -0.505383348 | 3.59564516 | -8.003734742 | 4.21E-14 | 2.61E-13 | 21.22589457 |
| HEXIM2   | -0.520345663 | 2.91243408 | -8.002464517 | 4.24E-14 | 2.63E-13 | 21.21777197 |
| RBM4     | -0.477010364 | 3.01700056 | -7.999812936 | 4.32E-14 | 2.68E-13 | 21.20081863 |
| PSMD10   | -0.487394743 | 5.6601976  | -7.999339931 | 4.33E-14 | 2.69E-13 | 21.19779474 |
| JAGN1    | -0.448728003 | 5.95428037 | -7.998720575 | 4.35E-14 | 2.70E-13 | 21.1938354  |
| CCDC32   | -0.437976441 | 2.68764454 | -7.996585912 | 4.41E-14 | 2.73E-13 | 21.18019062 |
| C1D      | -0.537934794 | 3.78348072 | -7.996204173 | 4.42E-14 | 2.74E-13 | 21.17775077 |
| DLG3     | -0.532057686 | 4.89373901 | -7.995229003 | 4.45E-14 | 2.75E-13 | 21.17151838 |
| HDHD2    | -0.713302561 | 4.51551815 | -7.99176674  | 4.55E-14 | 2.82E-13 | 21.14939445 |
| MGAT3    | 1.65968211   | 3.49274347 | 7.991466291  | 4.56E-14 | 2.82E-13 | 21.14747484 |
| SELENO   | -0.819497221 | 6.20145302 | -7.990901232 | 4.58E-14 | 2.83E-13 | 21.14386473 |
| ACE      | -0.862701573 | 3.30108014 | -7.990867865 | 4.58E-14 | 2.83E-13 | 21.14365156 |
| IFT52    | -0.505785993 | 5.40369316 | -7.984914747 | 4.76E-14 | 2.94E-13 | 21.10562699 |
| YAE1     | -0.406686297 | 3.57450356 | -7.982259551 | 4.84E-14 | 2.99E-13 | 21.08867284 |
| SLC48A1  | -0.588986207 | 5.91040458 | -7.982222534 | 4.84E-14 | 2.99E-13 | 21.08843651 |
| LYSMD1   | -0.499156434 | 3.66134543 | -7.982039698 | 4.85E-14 | 2.99E-13 | 21.08726918 |
| TMEM70   | -0.415848731 | 3.76487661 | -7.980970426 | 4.88E-14 | 3.01E-13 | 21.08044265 |
| ABCG2    | -1.035037329 | 2.88510888 | -7.980532007 | 4.89E-14 | 3.02E-13 | 21.07764383 |
| SFT2D1   | -0.471739123 | 5.41653588 | -7.979896725 | 4.91E-14 | 3.03E-13 | 21.0735884  |
| SRBD1    | -0.574423499 | 3.53614311 | -7.97911593  | 4.94E-14 | 3.05E-13 | 21.06860434 |
| BAP1     | -0.410246195 | 5.63395732 | -7.978395637 | 4.96E-14 | 3.06E-13 | 21.06400675 |
| DARS     | -0.496181736 | 5.96555761 | -7.976117696 | 5.04E-14 | 3.10E-13 | 21.04946839 |
| ARHGEF   | -0.78931853  | 5.15240133 | -7.976106503 | 5.04E-14 | 3.10E-13 | 21.04939696 |
| CABIN1   | -0.577012126 | 4.9706837  | -7.9753279   | 5.06E-14 | 3.12E-13 | 21.04442831 |
| PSMA5    | -0.388323951 | 5.28992518 | -7.975058418 | 5.07E-14 | 3.12E-13 | 21.04270868 |
| ZC3H15   | -0.522992363 | 5.80467366 | -7.974358995 | 5.09E-14 | 3.13E-13 | 21.03824565 |
| FA2H     | -0.884785033 | 2.04357925 | -7.972674037 | 5.15E-14 | 3.17E-13 | 21.02749488 |
| FARSA    | -0.424219542 | 6.16769472 | -7.972606912 | 5.15E-14 | 3.17E-13 | 21.02706663 |

|         |              |            |              |          |          |             |
|---------|--------------|------------|--------------|----------|----------|-------------|
| ARNTL2  | 0.700225157  | 1.40583395 | 7.971821242  | 5.18E-14 | 3.18E-13 | 21.02205419 |
| CSTF1   | -0.429754869 | 4.19054322 | -7.971812429 | 5.18E-14 | 3.18E-13 | 21.02199797 |
| VTCN1   | 1.499042022  | 1.35784941 | 7.971155714  | 5.20E-14 | 3.19E-13 | 21.01780848 |
| SMARCA  | -0.733069943 | 5.75473315 | -7.971056128 | 5.20E-14 | 3.19E-13 | 21.0171732  |
| RAB6B   | -0.664706718 | 2.82882972 | -7.968613666 | 5.29E-14 | 3.24E-13 | 21.00159354 |
| FGF11   | -0.446737764 | 0.48158669 | -7.968490836 | 5.29E-14 | 3.25E-13 | 21.00081012 |
| SOX18   | -1.028039335 | 4.32909783 | -7.968454964 | 5.29E-14 | 3.25E-13 | 21.00058133 |
| NUP88   | -0.481137893 | 4.26482153 | -7.968114016 | 5.30E-14 | 3.25E-13 | 20.99840679 |
| RNF32   | -0.338278403 | 1.23061254 | -7.967911337 | 5.31E-14 | 3.25E-13 | 20.99711414 |
| PCBP2   | -0.393012838 | 7.16236001 | -7.967601102 | 5.32E-14 | 3.26E-13 | 20.99513557 |
| SLC22A2 | -0.592954911 | 1.78048308 | -7.96756648  | 5.32E-14 | 3.26E-13 | 20.99491476 |
| CMBL    | -0.869381145 | 4.52774642 | -7.967296464 | 5.33E-14 | 3.26E-13 | 20.99319273 |
| TBC1D1  | -0.498619133 | 2.95025695 | -7.966625339 | 5.36E-14 | 3.28E-13 | 20.98891277 |
| SYVN1   | -0.517873676 | 5.79915455 | -7.965572948 | 5.39E-14 | 3.30E-13 | 20.98220181 |
| DYNLL1  | -0.448050603 | 6.95639921 | -7.964827954 | 5.42E-14 | 3.31E-13 | 20.9774514  |
| CDKN2C  | -0.798176824 | 3.69268202 | -7.964417232 | 5.43E-14 | 3.32E-13 | 20.97483258 |
| FOXO1   | -0.802126352 | 4.90007388 | -7.961702295 | 5.53E-14 | 3.38E-13 | 20.95752374 |
| GMNN    | -0.513494469 | 3.59189193 | -7.96061737  | 5.57E-14 | 3.40E-13 | 20.95060788 |
| PITX3   | 0.509229994  | 0.55265817 | 7.959723371  | 5.60E-14 | 3.42E-13 | 20.94490952 |
| SALL2   | -0.905300071 | 3.96463474 | -7.959594367 | 5.61E-14 | 3.42E-13 | 20.94408728 |
| SCGN    | -0.679819314 | 0.65864657 | -7.958710084 | 5.64E-14 | 3.44E-13 | 20.93845127 |
| SHARPI  | -0.40830985  | 6.20362987 | -7.958451737 | 5.65E-14 | 3.44E-13 | 20.93680476 |
| NT5DC1  | -0.550899704 | 4.57522683 | -7.957968511 | 5.66E-14 | 3.45E-13 | 20.93372513 |
| PERM1   | 0.81331905   | 1.77076698 | 7.956349527  | 5.72E-14 | 3.49E-13 | 20.92340804 |
| HTRA2   | -0.44123115  | 4.46526798 | -7.956286365 | 5.73E-14 | 3.49E-13 | 20.92300556 |
| KRCC1   | -0.535084153 | 6.29447272 | -7.955718417 | 5.75E-14 | 3.50E-13 | 20.91938659 |
| MCF2L   | -0.603071279 | 2.55120487 | -7.955400882 | 5.76E-14 | 3.51E-13 | 20.91736332 |
| DHDDS   | -0.408339552 | 4.49531935 | -7.95419128  | 5.81E-14 | 3.53E-13 | 20.90965643 |
| RPS6KA  | -0.435110442 | 5.46621264 | -7.953855487 | 5.82E-14 | 3.54E-13 | 20.90751707 |
| SNAP47  | -0.475055622 | 4.01677175 | -7.953169774 | 5.84E-14 | 3.55E-13 | 20.90314852 |
| PLEKHA  | 1.130790292  | 2.18776901 | 7.952438063  | 5.87E-14 | 3.57E-13 | 20.89848718 |
| CREG1   | -0.575210618 | 7.32046182 | -7.952197026 | 5.88E-14 | 3.57E-13 | 20.89695172 |
| NAA40   | -0.546642336 | 4.04157002 | -7.949872469 | 5.97E-14 | 3.63E-13 | 20.88214519 |
| NOTCH4  | -0.825756584 | 3.80232078 | -7.949439235 | 5.99E-14 | 3.64E-13 | 20.87938594 |
| FAAP20  | -0.535826472 | 3.83461341 | -7.948213128 | 6.03E-14 | 3.66E-13 | 20.87157741 |
| PCTP    | -0.437124443 | 3.17959295 | -7.947690364 | 6.05E-14 | 3.67E-13 | 20.86824839 |
| CYREN   | -0.422226979 | 3.39206416 | -7.946487743 | 6.10E-14 | 3.70E-13 | 20.86059044 |
| ACAD8   | -0.715726651 | 4.62473807 | -7.945631746 | 6.14E-14 | 3.72E-13 | 20.85514012 |
| FAM120  | -0.529853929 | 5.7303397  | -7.94393853  | 6.20E-14 | 3.76E-13 | 20.8443601  |
| NRIP2   | -0.665933062 | 3.32948646 | -7.94305875  | 6.24E-14 | 3.78E-13 | 20.83875944 |

|          |              |            |              |          |          |             |
|----------|--------------|------------|--------------|----------|----------|-------------|
| PUS3     | -0.377196074 | 3.9916453  | -7.942852256 | 6.25E-14 | 3.78E-13 | 20.83744496 |
| ZNF76    | -0.446277066 | 4.66954559 | -7.942477153 | 6.26E-14 | 3.79E-13 | 20.83505721 |
| IL17D    | -0.546556914 | 1.5814048  | -7.94233744  | 6.27E-14 | 3.79E-13 | 20.83416787 |
| RPUSD3   | -0.362007075 | 3.92678902 | -7.941856708 | 6.29E-14 | 3.80E-13 | 20.83110787 |
| STARD7   | -0.524834046 | 6.63670958 | -7.941285028 | 6.31E-14 | 3.82E-13 | 20.8274691  |
| SHLD3    | -0.363864266 | 2.15872363 | -7.941260851 | 6.31E-14 | 3.82E-13 | 20.82731521 |
| MARCO    | 1.730960819  | 2.97003634 | 7.940062633  | 6.36E-14 | 3.84E-13 | 20.81968903 |
| ATP5F1C  | -0.665640437 | 6.55385526 | -7.939646538 | 6.38E-14 | 3.85E-13 | 20.81704091 |
| C19orf54 | -0.455347964 | 3.60314415 | -7.939466178 | 6.39E-14 | 3.86E-13 | 20.81589308 |
| EMC2     | -0.466989128 | 4.77067291 | -7.938156117 | 6.44E-14 | 3.89E-13 | 20.80755623 |
| RNASEH   | -0.448432746 | 3.74970395 | -7.937370086 | 6.47E-14 | 3.91E-13 | 20.80255455 |
| CDKL3    | -0.301961789 | 1.18983131 | -7.935260527 | 6.56E-14 | 3.96E-13 | 20.78913247 |
| ZNF444   | -0.580561838 | 4.41707783 | -7.935061877 | 6.57E-14 | 3.96E-13 | 20.78786867 |
| BORCS8   | -0.372996842 | 3.26200582 | -7.933369231 | 6.64E-14 | 4.01E-13 | 20.77710093 |
| NT5C     | -0.52333139  | 5.7105422  | -7.932343548 | 6.69E-14 | 4.03E-13 | 20.77057673 |
| SLC25A5  | -0.708226296 | 8.0549071  | -7.931394962 | 6.73E-14 | 4.05E-13 | 20.76454338 |
| TMEM17   | -1.35370133  | 3.26362922 | -7.930319735 | 6.77E-14 | 4.08E-13 | 20.75770508 |
| ZNF77    | -0.429360644 | 2.44288215 | -7.929069134 | 6.83E-14 | 4.11E-13 | 20.74975213 |
| YIPF3    | -0.482756659 | 7.18563937 | -7.927935404 | 6.88E-14 | 4.14E-13 | 20.74254306 |
| SDHA     | -0.51609287  | 4.87089082 | -7.927115211 | 6.92E-14 | 4.16E-13 | 20.73732807 |
| AK8      | -0.601477509 | 3.08725237 | -7.92485335  | 7.02E-14 | 4.22E-13 | 20.72294828 |
| ARL6     | -0.431894338 | 2.55913018 | -7.924475076 | 7.04E-14 | 4.23E-13 | 20.72054364 |
| AQP4     | -1.46595049  | 2.87583462 | -7.924100944 | 7.05E-14 | 4.24E-13 | 20.7181654  |
| GTF2IIRC | -0.39221924  | 1.54737393 | -7.923121427 | 7.10E-14 | 4.26E-13 | 20.71193925 |
| DPM3     | -0.638272296 | 7.2307309  | -7.923076453 | 7.10E-14 | 4.26E-13 | 20.71165339 |
| PBX3     | -1.26372544  | 6.37492011 | -7.922929017 | 7.11E-14 | 4.27E-13 | 20.71071627 |
| DDX28    | -0.416043348 | 4.16365309 | -7.922212011 | 7.14E-14 | 4.28E-13 | 20.7061591  |
| MLH3     | -0.498561966 | 3.39496505 | -7.921422588 | 7.18E-14 | 4.31E-13 | 20.70114193 |
| QRICH2   | -0.667655944 | 1.86125615 | -7.920407522 | 7.22E-14 | 4.33E-13 | 20.69469114 |
| SLC25A3  | -0.496650223 | 3.18383598 | -7.92020323  | 7.23E-14 | 4.33E-13 | 20.69339292 |
| CRIP1    | -0.359185797 | 4.22794924 | -7.920199862 | 7.23E-14 | 4.33E-13 | 20.69337151 |
| AP5M1    | -0.479528016 | 3.43214337 | -7.919515558 | 7.26E-14 | 4.35E-13 | 20.68902308 |
| IGDCC3   | -0.928908507 | 1.25034632 | -7.918002082 | 7.34E-14 | 4.39E-13 | 20.67940645 |
| BTF3L4   | -0.42593371  | 4.68840503 | -7.917396745 | 7.36E-14 | 4.41E-13 | 20.67556045 |
| CLP1     | -0.487705091 | 3.44167565 | -7.917226796 | 7.37E-14 | 4.41E-13 | 20.67448072 |
| DCAF13   | -0.418656968 | 3.29818131 | -7.913853744 | 7.54E-14 | 4.51E-13 | 20.65305361 |
| SUPV3L   | -0.337869308 | 4.00464844 | -7.911656286 | 7.64E-14 | 4.57E-13 | 20.63909737 |
| SIVA1    | -0.559678273 | 5.28367067 | -7.910712446 | 7.69E-14 | 4.60E-13 | 20.63310368 |
| ZNF804E  | -0.997442482 | 0.73869615 | -7.908903024 | 7.78E-14 | 4.65E-13 | 20.62161448 |
| USP40    | -0.518393747 | 4.08056551 | -7.908063686 | 7.82E-14 | 4.67E-13 | 20.61628552 |

|          |              |            |              |          |          |             |
|----------|--------------|------------|--------------|----------|----------|-------------|
| TYW3     | -0.510789261 | 4.13785805 | -7.907460483 | 7.85E-14 | 4.69E-13 | 20.61245599 |
| ZNF835   | -0.471395443 | 1.74112831 | -7.906346149 | 7.91E-14 | 4.72E-13 | 20.60538192 |
| THEM4    | -0.447132004 | 4.10873197 | -7.906096703 | 7.92E-14 | 4.73E-13 | 20.60379846 |
| TUBGCP   | -0.497240877 | 3.1100806  | -7.906093244 | 7.92E-14 | 4.73E-13 | 20.60377651 |
| LPCAT2   | -0.856188931 | 5.96386677 | -7.905683666 | 7.94E-14 | 4.74E-13 | 20.60117661 |
| RPL41    | -0.615631637 | 9.34731803 | -7.905153959 | 7.97E-14 | 4.75E-13 | 20.59781428 |
| TTC34    | -0.490332613 | 0.88614851 | -7.902687241 | 8.10E-14 | 4.83E-13 | 20.58215854 |
| C14orf28 | -0.427322913 | 2.4441925  | -7.902130057 | 8.13E-14 | 4.84E-13 | 20.57862262 |
| PJA1     | -0.784430478 | 5.70576761 | -7.899198566 | 8.28E-14 | 4.93E-13 | 20.56002171 |
| ATG5     | -0.470540637 | 4.94736934 | -7.898025839 | 8.35E-14 | 4.97E-13 | 20.55258169 |
| SCOC     | -0.491739116 | 5.10532633 | -7.894212348 | 8.55E-14 | 5.09E-13 | 20.52839276 |
| EFHB     | -0.432174496 | 0.77152118 | -7.893826487 | 8.57E-14 | 5.10E-13 | 20.52594564 |
| ZNF630   | -0.482972598 | 2.34373299 | -7.891613854 | 8.70E-14 | 5.17E-13 | 20.51191459 |
| SYNJ2BF  | -0.511038881 | 4.06974065 | -7.889579692 | 8.81E-14 | 5.24E-13 | 20.49901739 |
| CALM1    | -0.4479812   | 6.88049108 | -7.887746895 | 8.92E-14 | 5.30E-13 | 20.48739864 |
| IP6K3    | -1.294080306 | 2.53655715 | -7.887604255 | 8.93E-14 | 5.30E-13 | 20.48649447 |
| WRNIP1   | -0.447993747 | 5.75885248 | -7.887318887 | 8.94E-14 | 5.31E-13 | 20.48468558 |
| ABHD15   | -0.525903089 | 4.13243213 | -7.887241768 | 8.95E-14 | 5.31E-13 | 20.48419675 |
| TOR1A    | -0.449934517 | 5.08675395 | -7.886166431 | 9.01E-14 | 5.35E-13 | 20.47738083 |
| PRXL2C   | -0.51503382  | 4.07922883 | -7.885773982 | 9.03E-14 | 5.36E-13 | 20.47489348 |
| TPRG1L   | -0.501059809 | 6.84229951 | -7.885430447 | 9.05E-14 | 5.37E-13 | 20.4727162  |
| F8       | -0.705177909 | 2.54472447 | -7.882133656 | 9.25E-14 | 5.48E-13 | 20.45182452 |
| HARS2    | -0.414607484 | 4.84308132 | -7.881733604 | 9.27E-14 | 5.49E-13 | 20.44928977 |
| ARHGEF   | -0.5643499   | 3.74387437 | -7.880265887 | 9.36E-14 | 5.54E-13 | 20.43999088 |
| RFXANK   | -0.52270417  | 6.2220154  | -7.879820788 | 9.38E-14 | 5.56E-13 | 20.43717111 |
| HIGD1B   | -1.005584827 | 3.41536827 | -7.873640603 | 9.77E-14 | 5.78E-13 | 20.39802874 |
| EEF1E1   | -0.401570235 | 3.63155283 | -7.871848911 | 9.88E-14 | 5.85E-13 | 20.38668451 |
| EXTL2    | -0.562198062 | 3.30840001 | -7.871455689 | 9.90E-14 | 5.86E-13 | 20.384195   |
| ZNF709   | -0.245082163 | 0.64907131 | -7.870255961 | 9.98E-14 | 5.90E-13 | 20.37659994 |
| YDJC     | -0.603356579 | 5.06856471 | -7.868591283 | 1.01E-13 | 5.96E-13 | 20.3660626  |
| HRC      | -0.762722707 | 1.9175746  | -7.868383279 | 1.01E-13 | 5.97E-13 | 20.36474605 |
| PTPN4    | -0.759736833 | 3.24993985 | -7.865448766 | 1.03E-13 | 6.08E-13 | 20.34617432 |
| MCCC1    | -0.493718593 | 4.51188672 | -7.865205661 | 1.03E-13 | 6.09E-13 | 20.34463597 |
| DCPS     | -0.359574978 | 3.77514756 | -7.863774349 | 1.04E-13 | 6.14E-13 | 20.33557929 |
| CCNA1    | 0.962635047  | 1.43996266 | 7.863377582  | 1.04E-13 | 6.16E-13 | 20.33306891 |
| MTURN    | -0.660176264 | 4.20274696 | -7.863109336 | 1.05E-13 | 6.17E-13 | 20.33137174 |
| GUK1     | -0.43680874  | 6.64754261 | -7.861619104 | 1.06E-13 | 6.22E-13 | 20.3219438  |
| PDLIM3   | -0.935071984 | 2.28601492 | -7.860248305 | 1.06E-13 | 6.28E-13 | 20.31327241 |
| RRBP1    | -0.661966237 | 8.26693723 | -7.859790986 | 1.07E-13 | 6.29E-13 | 20.31037971 |
| HAUS1    | -0.410110608 | 4.21363938 | -7.85940084  | 1.07E-13 | 6.31E-13 | 20.30791199 |

|          |              |            |              |          |          |             |
|----------|--------------|------------|--------------|----------|----------|-------------|
| DSC3     | 1.133317055  | 1.07881327 | 7.858353079  | 1.08E-13 | 6.35E-13 | 20.30128513 |
| NEB      | -0.983891747 | 0.84295463 | -7.857317165 | 1.08E-13 | 6.39E-13 | 20.29473372 |
| C9orf153 | -0.143124746 | 0.2021843  | -7.857182143 | 1.09E-13 | 6.39E-13 | 20.29387985 |
| GLDC     | -1.505975173 | 1.32454864 | -7.855038333 | 1.10E-13 | 6.48E-13 | 20.28032362 |
| EGFL7    | -0.837773312 | 5.90315227 | -7.852177073 | 1.12E-13 | 6.59E-13 | 20.26223418 |
| IFT140   | -0.673904391 | 4.48663131 | -7.85053334  | 1.13E-13 | 6.66E-13 | 20.25184399 |
| STOX2    | -0.60268528  | 2.08460882 | -7.850413306 | 1.13E-13 | 6.66E-13 | 20.2510853  |
| NOP16    | -0.384179025 | 3.5857735  | -7.849303958 | 1.14E-13 | 6.71E-13 | 20.24407383 |
| STXBP4   | -0.425413773 | 1.72188305 | -7.848887846 | 1.15E-13 | 6.73E-13 | 20.241444   |
| C3       | 1.956899541  | 6.11743726 | 7.847309276  | 1.16E-13 | 6.79E-13 | 20.23146825 |
| CCL13    | 1.544857083  | 2.58884948 | 7.843151104  | 1.19E-13 | 6.97E-13 | 20.20519659 |
| STK17B   | 1.000449206  | 3.1716255  | 7.841818145  | 1.20E-13 | 7.03E-13 | 20.19677664 |
| RPL7L1   | -0.475214291 | 5.26986614 | -7.840321007 | 1.21E-13 | 7.10E-13 | 20.18732067 |
| SEMA6A   | -0.570521417 | 1.9713148  | -7.840038134 | 1.21E-13 | 7.11E-13 | 20.18553416 |
| LTF      | -1.16070644  | 2.305019   | -7.839632605 | 1.22E-13 | 7.12E-13 | 20.18297307 |
| ZNF747   | -0.374195068 | 3.88044753 | -7.839081105 | 1.22E-13 | 7.15E-13 | 20.17949024 |
| LRRC70   | -0.599982314 | 1.32239093 | -7.836967208 | 1.24E-13 | 7.24E-13 | 20.16614197 |
| DCAF11   | -0.514433466 | 5.83172632 | -7.834969679 | 1.25E-13 | 7.33E-13 | 20.15353053 |
| BEX1     | -1.726718087 | 4.21125867 | -7.834862601 | 1.25E-13 | 7.33E-13 | 20.15285454 |
| RAB3A    | -0.571905488 | 2.82109511 | -7.834859714 | 1.25E-13 | 7.33E-13 | 20.15283632 |
| CHMP4B   | -0.404898117 | 8.30779505 | -7.833648886 | 1.26E-13 | 7.39E-13 | 20.14519275 |
| COQ8B    | -0.457770647 | 4.44395169 | -7.832938897 | 1.27E-13 | 7.42E-13 | 20.14071116 |
| LARGE2   | -0.735574127 | 4.2882959  | -7.832379766 | 1.27E-13 | 7.44E-13 | 20.13718199 |
| SAP30    | -0.575451296 | 4.16853826 | -7.832156677 | 1.28E-13 | 7.45E-13 | 20.13577391 |
| BAK1     | -0.418878228 | 4.02273652 | -7.831949826 | 1.28E-13 | 7.46E-13 | 20.13446835 |
| MORN4    | -0.450384084 | 4.20022981 | -7.830472009 | 1.29E-13 | 7.53E-13 | 20.12514159 |
| SAAL1    | -0.348907026 | 3.19674116 | -7.830136031 | 1.29E-13 | 7.54E-13 | 20.12302132 |
| FAM76A   | -0.45590028  | 3.89337028 | -7.82899053  | 1.30E-13 | 7.59E-13 | 20.1157928  |
| KCNK2    | -1.213802826 | 1.95112301 | -7.828933456 | 1.30E-13 | 7.59E-13 | 20.11543266 |
| CAMK1D   | -0.756141501 | 3.57747053 | -7.828446244 | 1.31E-13 | 7.61E-13 | 20.11235838 |
| BIK      | -0.617421983 | 2.80606292 | -7.827205816 | 1.32E-13 | 7.67E-13 | 20.10453189 |
| NECAB1   | -0.62760812  | 1.12669077 | -7.827110485 | 1.32E-13 | 7.67E-13 | 20.10393043 |
| ARL1     | -0.510363887 | 6.32797242 | -7.827109338 | 1.32E-13 | 7.67E-13 | 20.10392319 |
| GIMAP7   | -0.825965886 | 5.19771267 | -7.824971604 | 1.34E-13 | 7.77E-13 | 20.09043703 |
| MRPL30   | -0.395793458 | 4.64305292 | -7.824764531 | 1.34E-13 | 7.78E-13 | 20.0891308  |
| COQ10A   | -0.430689467 | 3.23238873 | -7.824550454 | 1.34E-13 | 7.79E-13 | 20.08778042 |
| PMPCB    | -0.417600774 | 5.43465267 | -7.824012068 | 1.34E-13 | 7.81E-13 | 20.08438441 |
| MYPOP    | -0.34697476  | 3.38064076 | -7.820937787 | 1.37E-13 | 7.97E-13 | 20.06499533 |
| MPP1     | -0.463970466 | 3.77239413 | -7.817659964 | 1.40E-13 | 8.13E-13 | 20.04432768 |
| CD164    | -0.63061466  | 7.67509272 | -7.815896519 | 1.42E-13 | 8.22E-13 | 20.03321084 |

|         |              |            |              |          |          |             |
|---------|--------------|------------|--------------|----------|----------|-------------|
| RAMP2   | -0.801747618 | 5.98709411 | -7.8136182   | 1.44E-13 | 8.34E-13 | 20.01885047 |
| ODAM    | -0.975166492 | 0.7599046  | -7.813322716 | 1.44E-13 | 8.35E-13 | 20.01698821 |
| C9orf24 | -0.550897836 | 0.67595706 | -7.811603376 | 1.45E-13 | 8.44E-13 | 20.00615307 |
| LRRC47  | -0.476681915 | 5.56020081 | -7.810119393 | 1.47E-13 | 8.52E-13 | 19.99680231 |
| YBEY    | -0.51024292  | 4.33718908 | -7.810037222 | 1.47E-13 | 8.52E-13 | 19.99628457 |
| GRINA   | -0.486960719 | 8.44159718 | -7.809826714 | 1.47E-13 | 8.53E-13 | 19.99495823 |
| HEMK1   | -0.42626973  | 2.56882044 | -7.806443916 | 1.50E-13 | 8.72E-13 | 19.97364736 |
| ELOB    | -0.536782817 | 8.62334959 | -7.805694047 | 1.51E-13 | 8.75E-13 | 19.96892412 |
| PIK3C2B | -0.612588111 | 3.30824736 | -7.804329763 | 1.52E-13 | 8.83E-13 | 19.96033154 |
| EHF     | 1.280738752  | 2.33107147 | 7.803908569  | 1.53E-13 | 8.85E-13 | 19.95767895 |
| RASGEF  | 0.797434491  | 2.21556124 | 7.802187279  | 1.55E-13 | 8.94E-13 | 19.94683955 |
| SAMD15  | -0.661392507 | 2.20161794 | -7.801410002 | 1.55E-13 | 8.99E-13 | 19.94194532 |
| MICAL2  | 0.931270249  | 3.22239874 | 7.799445765  | 1.57E-13 | 9.10E-13 | 19.92957857 |
| SMOX    | -0.777401816 | 3.56751472 | -7.799264186 | 1.57E-13 | 9.10E-13 | 19.92843545 |
| PDSS2   | -0.526734664 | 4.57955762 | -7.797471328 | 1.59E-13 | 9.21E-13 | 19.91714952 |
| TTC19   | -0.486579437 | 5.12246894 | -7.797231918 | 1.59E-13 | 9.22E-13 | 19.91564258 |
| CHST12  | -0.37861419  | 2.44247185 | -7.794937719 | 1.62E-13 | 9.35E-13 | 19.90120334 |
| MFF     | -0.367447104 | 4.77306804 | -7.794863636 | 1.62E-13 | 9.35E-13 | 19.90073712 |
| GFM2    | -0.536552334 | 4.08738343 | -7.793849191 | 1.63E-13 | 9.41E-13 | 19.89435327 |
| DNALI1  | -1.053736097 | 3.93508583 | -7.793148225 | 1.64E-13 | 9.45E-13 | 19.88994243 |
| MRPL18  | -0.40254242  | 6.5749538  | -7.792480015 | 1.64E-13 | 9.49E-13 | 19.88573793 |
| NIM1K   | -0.586493425 | 0.75534844 | -7.789835789 | 1.67E-13 | 9.64E-13 | 19.86910216 |
| TMEM23  | 0.247940586  | 0.32450969 | 7.789746994  | 1.67E-13 | 9.65E-13 | 19.86854358 |
| HMG20B  | -0.444199956 | 5.64737807 | -7.788068037 | 1.69E-13 | 9.75E-13 | 19.85798254 |
| TM2D1   | -0.537206474 | 4.03498618 | -7.787466751 | 1.70E-13 | 9.78E-13 | 19.85420064 |
| PFKFB1  | -0.398978699 | 0.52821541 | -7.784010437 | 1.74E-13 | 9.99E-13 | 19.83246504 |
| COX4I2  | -1.147046393 | 4.65127957 | -7.7839997   | 1.74E-13 | 9.99E-13 | 19.83239753 |
| CASP9   | -0.520505895 | 3.78476838 | -7.782664293 | 1.75E-13 | 1.01E-12 | 19.8240012  |
| PRCD    | -0.218732119 | 0.46877723 | -7.781220671 | 1.77E-13 | 1.02E-12 | 19.81492547 |
| IQCE    | -0.483330924 | 3.84882608 | -7.779876207 | 1.78E-13 | 1.03E-12 | 19.80647406 |
| XPNPEP  | -0.40409632  | 4.59612181 | -7.779632843 | 1.78E-13 | 1.03E-12 | 19.80494435 |
| INPPL1  | -0.483941051 | 5.64738102 | -7.778236346 | 1.80E-13 | 1.04E-12 | 19.79616697 |
| COL25A1 | -0.758830531 | 0.92506874 | -7.776488867 | 1.82E-13 | 1.05E-12 | 19.78518494 |
| SCFD2   | -0.442498866 | 3.81808288 | -7.774676884 | 1.84E-13 | 1.06E-12 | 19.77379914 |
| CUX1    | -0.48285012  | 4.91492663 | -7.773230174 | 1.86E-13 | 1.07E-12 | 19.76470975 |
| MSRB1   | -0.423501213 | 4.73094921 | -7.77252402  | 1.87E-13 | 1.07E-12 | 19.7602735  |
| DDX56   | -0.437687908 | 5.60587016 | -7.771682286 | 1.88E-13 | 1.08E-12 | 19.75498583 |
| INTS14  | -0.487974073 | 5.10350028 | -7.768805687 | 1.91E-13 | 1.10E-12 | 19.73691805 |
| KLK10   | 2.483238952  | 4.26796694 | 7.767917959  | 1.92E-13 | 1.10E-12 | 19.73134311 |
| EEFSEC  | -0.382535334 | 4.62533056 | -7.767597863 | 1.93E-13 | 1.10E-12 | 19.72933299 |

|         |              |            |              |          |          |             |
|---------|--------------|------------|--------------|----------|----------|-------------|
| SLC9B1  | -0.252171325 | 0.76788352 | -7.766979743 | 1.94E-13 | 1.11E-12 | 19.72545152 |
| PRTG    | -0.806161016 | 2.15073949 | -7.765364088 | 1.96E-13 | 1.12E-12 | 19.71530696 |
| PTDSS1  | -0.544883403 | 5.11531104 | -7.764552546 | 1.97E-13 | 1.13E-12 | 19.71021184 |
| USP19   | -0.5121148   | 5.37694537 | -7.764373411 | 1.97E-13 | 1.13E-12 | 19.70908722 |
| DSC2    | 0.951581581  | 2.63001904 | 7.76091894   | 2.01E-13 | 1.15E-12 | 19.68740294 |
| ZCCHC1  | -0.40571179  | 3.71923394 | -7.760199414 | 2.02E-13 | 1.16E-12 | 19.68288711 |
| RSPH6A  | -1.05182724  | 2.24729244 | -7.759131242 | 2.03E-13 | 1.16E-12 | 19.6761836  |
| ZNF771  | -0.432814044 | 1.65312051 | -7.759064441 | 2.04E-13 | 1.16E-12 | 19.67576441 |
| EIF1B   | -0.492975869 | 6.26433831 | -7.75815433  | 2.05E-13 | 1.17E-12 | 19.67005333 |
| DNAJC7  | -0.370344237 | 4.65336663 | -7.757508996 | 2.06E-13 | 1.17E-12 | 19.66600401 |
| FICD    | -0.592841069 | 3.15492314 | -7.756226249 | 2.07E-13 | 1.18E-12 | 19.6579557  |
| DMKN    | -0.806785136 | 5.48783676 | -7.755435715 | 2.08E-13 | 1.19E-12 | 19.65299608 |
| CDK10   | -0.595747199 | 5.14088815 | -7.755215412 | 2.09E-13 | 1.19E-12 | 19.65161401 |
| PUS7    | -0.57876248  | 2.98798357 | -7.751716665 | 2.13E-13 | 1.22E-12 | 19.62966785 |
| RADIL   | -0.520642984 | 0.71621963 | -7.750897517 | 2.14E-13 | 1.22E-12 | 19.62453056 |
| FSTL3   | 1.091631175  | 5.01231835 | 7.750335271  | 2.15E-13 | 1.23E-12 | 19.62100464 |
| VWA1    | -0.76761921  | 5.96611842 | -7.749129314 | 2.17E-13 | 1.24E-12 | 19.61344243 |
| ABT1    | -0.3991457   | 4.81095777 | -7.749083977 | 2.17E-13 | 1.24E-12 | 19.61315815 |
| CCDC43  | -0.380143361 | 4.73231626 | -7.748946233 | 2.17E-13 | 1.24E-12 | 19.61229445 |
| NSFL1C  | -0.394781064 | 5.26078412 | -7.747496503 | 2.19E-13 | 1.25E-12 | 19.6032047  |
| TSPAN1  | -0.439252663 | 4.16548819 | -7.74417057  | 2.24E-13 | 1.27E-12 | 19.58235524 |
| ATP1A1  | -0.681585708 | 9.28555063 | -7.744100624 | 2.24E-13 | 1.27E-12 | 19.58191682 |
| DYNC111 | -0.616886672 | 1.28037299 | -7.743891502 | 2.24E-13 | 1.28E-12 | 19.58060608 |
| RBM47   | -0.603553407 | 5.97496195 | -7.742772341 | 2.26E-13 | 1.28E-12 | 19.57359173 |
| ZNF18   | -0.382182798 | 3.28492952 | -7.742101316 | 2.27E-13 | 1.29E-12 | 19.56938638 |
| MEIG1   | -0.305340956 | 0.5882431  | -7.740200822 | 2.30E-13 | 1.30E-12 | 19.5574771  |
| TSEN15  | -0.416948683 | 5.15864798 | -7.740080322 | 2.30E-13 | 1.31E-12 | 19.55672206 |
| UBE2D3  | -0.443443622 | 6.18365197 | -7.739834672 | 2.30E-13 | 1.31E-12 | 19.55518286 |
| XKR8    | -0.435451803 | 4.03727657 | -7.739500276 | 2.31E-13 | 1.31E-12 | 19.55308764 |
| SCARF1  | -0.684535959 | 4.13061064 | -7.739326483 | 2.31E-13 | 1.31E-12 | 19.55199874 |
| SS18L2  | -0.379864663 | 4.96701264 | -7.738606255 | 2.32E-13 | 1.32E-12 | 19.54748628 |
| KIF22   | -0.618679323 | 5.98259956 | -7.738553004 | 2.32E-13 | 1.32E-12 | 19.54715266 |
| GOSR2   | -0.443974041 | 3.56584701 | -7.735206767 | 2.37E-13 | 1.34E-12 | 19.52619092 |
| LIX1L   | -0.657730942 | 4.2878713  | -7.73489587  | 2.37E-13 | 1.35E-12 | 19.52424366 |
| PHF20L1 | -0.593704499 | 2.92369128 | -7.734867691 | 2.38E-13 | 1.35E-12 | 19.52406717 |
| SAMD5   | -0.909030439 | 1.24614548 | -7.732853533 | 2.41E-13 | 1.36E-12 | 19.51145299 |
| MAP7D3  | -0.546551465 | 3.10786021 | -7.732342201 | 2.41E-13 | 1.37E-12 | 19.50825096 |
| SLC39A3 | -0.405103957 | 3.6248748  | -7.732263912 | 2.42E-13 | 1.37E-12 | 19.50776072 |
| DYRK3   | -0.565963394 | 2.64129822 | -7.732138821 | 2.42E-13 | 1.37E-12 | 19.50697741 |
| CFB     | 1.325144458  | 2.4351411  | 7.730974383  | 2.43E-13 | 1.38E-12 | 19.49968616 |

|         |              |            |              |          |          |             |
|---------|--------------|------------|--------------|----------|----------|-------------|
| PRMT1   | -0.468643486 | 6.24810505 | -7.728979797 | 2.47E-13 | 1.39E-12 | 19.48719844 |
| EXOSC3  | -0.357007588 | 3.75311088 | -7.728937719 | 2.47E-13 | 1.39E-12 | 19.48693502 |
| TAPT1   | -0.454809313 | 3.60817138 | -7.727646798 | 2.49E-13 | 1.41E-12 | 19.4788539  |
| GPR89A  | -0.226878529 | 1.27129249 | -7.727409461 | 2.49E-13 | 1.41E-12 | 19.47736827 |
| HIST1H2 | -1.088382166 | 4.04190819 | -7.727207247 | 2.49E-13 | 1.41E-12 | 19.47610252 |
| TMPRSS  | 1.245061436  | 1.18813538 | 7.718802583  | 2.63E-13 | 1.49E-12 | 19.42351197 |
| CLDN23  | -0.59035448  | 3.93182603 | -7.717756668 | 2.65E-13 | 1.49E-12 | 19.41696984 |
| MRGBP   | -0.414518557 | 4.37740845 | -7.715061439 | 2.69E-13 | 1.52E-12 | 19.40011391 |
| OSBPL2  | -0.411972961 | 3.91409992 | -7.713009332 | 2.73E-13 | 1.54E-12 | 19.38728251 |
| RBM8A   | -0.443382383 | 5.71039303 | -7.712222672 | 2.74E-13 | 1.55E-12 | 19.38236425 |
| OR13A1  | 0.359836519  | 0.35350368 | 7.711326723  | 2.76E-13 | 1.55E-12 | 19.37676309 |
| RHCE    | -0.414836824 | 0.77855166 | -7.710845193 | 2.77E-13 | 1.56E-12 | 19.3737529  |
| CEBPG   | -0.710609086 | 4.62737975 | -7.710558037 | 2.77E-13 | 1.56E-12 | 19.37195785 |
| RPP25   | -0.625166466 | 4.23801925 | -7.709618423 | 2.79E-13 | 1.57E-12 | 19.36608451 |
| SLC22A3 | 2.149633946  | 4.39351634 | 7.709425374  | 2.79E-13 | 1.57E-12 | 19.36487785 |
| ADCY1   | -0.899743067 | 2.05964705 | -7.708433982 | 2.81E-13 | 1.58E-12 | 19.35868143 |
| ERLIN2  | -0.616537647 | 5.07530397 | -7.708109211 | 2.82E-13 | 1.58E-12 | 19.35665165 |
| RAMAC   | -0.424599432 | 4.2775716  | -7.705050658 | 2.87E-13 | 1.61E-12 | 19.33753864 |
| HIST1H4 | -0.621932473 | 0.90688739 | -7.703682815 | 2.90E-13 | 1.63E-12 | 19.32899246 |
| AK7     | -0.55377426  | 1.15042246 | -7.703490125 | 2.90E-13 | 1.63E-12 | 19.32778863 |
| ZMPSTE  | -0.523579285 | 5.48846186 | -7.703375101 | 2.90E-13 | 1.63E-12 | 19.32707002 |
| CIAO3   | -0.375694885 | 3.52345893 | -7.703300371 | 2.90E-13 | 1.63E-12 | 19.32660315 |
| IRAK1BF | -0.450473808 | 2.26766553 | -7.701104144 | 2.94E-13 | 1.65E-12 | 19.3128837  |
| UXS1    | -0.58502096  | 4.77384571 | -7.700790759 | 2.95E-13 | 1.66E-12 | 19.31092623 |
| NANP    | -0.441184577 | 2.48647468 | -7.700714631 | 2.95E-13 | 1.66E-12 | 19.31045073 |
| CARD11  | 1.140180899  | 2.2188698  | 7.700707474  | 2.95E-13 | 1.66E-12 | 19.31040603 |
| RASL11A | -0.816371023 | 2.79336317 | -7.700217225 | 2.96E-13 | 1.66E-12 | 19.30734396 |
| BRF1    | -0.370457783 | 2.29398493 | -7.699792424 | 2.97E-13 | 1.66E-12 | 19.30469077 |
| RFXAP   | -0.477009602 | 2.98485877 | -7.698774775 | 2.99E-13 | 1.67E-12 | 19.29833519 |
| ARMC5   | -0.5612181   | 3.62732478 | -7.697906037 | 3.01E-13 | 1.68E-12 | 19.29291002 |
| VBP1    | -0.502183676 | 5.70544774 | -7.6967682   | 3.03E-13 | 1.69E-12 | 19.28580494 |
| SLC14A1 | -0.850832307 | 1.52412191 | -7.695289602 | 3.06E-13 | 1.71E-12 | 19.276573   |
| FOXF2   | -0.844230014 | 1.39848753 | -7.693302169 | 3.09E-13 | 1.73E-12 | 19.26416578 |
| MRPL12  | -0.564792527 | 5.36819899 | -7.692727546 | 3.11E-13 | 1.74E-12 | 19.26057888 |
| NCOA5   | -0.546254557 | 5.29970845 | -7.692491248 | 3.11E-13 | 1.74E-12 | 19.25910391 |
| TMEM64  | -0.748290806 | 4.62891428 | -7.69172278  | 3.13E-13 | 1.75E-12 | 19.25430734 |
| EIF2S2  | -0.450324414 | 6.29110003 | -7.691600505 | 3.13E-13 | 1.75E-12 | 19.25354416 |
| ZFP36L2 | -0.756199118 | 7.75996091 | -7.690453555 | 3.15E-13 | 1.76E-12 | 19.24638583 |
| BPHL    | -0.401408426 | 2.24830316 | -7.690111889 | 3.16E-13 | 1.76E-12 | 19.24425356 |
| ZNF569  | -0.471741027 | 2.51851879 | -7.689678514 | 3.17E-13 | 1.77E-12 | 19.24154903 |



|         |              |            |              |          |          |             |
|---------|--------------|------------|--------------|----------|----------|-------------|
| CATSPE  | -0.334039439 | 1.05734053 | -7.689620693 | 3.17E-13 | 1.77E-12 | 19.2411882  |
| ICA1    | -0.39958518  | 3.75534114 | -7.689057333 | 3.18E-13 | 1.77E-12 | 19.23767265 |
| PYGO2   | -0.500054517 | 6.2985242  | -7.688644046 | 3.19E-13 | 1.78E-12 | 19.2350937  |
| RUSC2   | -0.514234099 | 4.23647421 | -7.688474942 | 3.19E-13 | 1.78E-12 | 19.2340385  |
| DIPK1A  | -0.587133548 | 3.28159486 | -7.688122317 | 3.20E-13 | 1.78E-12 | 19.23183819 |
| ZNF446  | -0.427560077 | 3.16481752 | -7.688101962 | 3.20E-13 | 1.78E-12 | 19.23171118 |
| AEN     | -0.57077377  | 4.28777207 | -7.687513604 | 3.21E-13 | 1.79E-12 | 19.22804009 |
| IRX6    | -1.047117351 | 0.80550901 | -7.687211104 | 3.22E-13 | 1.79E-12 | 19.22615269 |
| GDF9    | -0.351076657 | 0.79517818 | -7.686518551 | 3.23E-13 | 1.80E-12 | 19.2218318  |
| CACYBP  | -0.385821233 | 4.75057576 | -7.683139388 | 3.30E-13 | 1.84E-12 | 19.20075241 |
| CABLES  | -0.689903383 | 3.3766661  | -7.681475189 | 3.34E-13 | 1.85E-12 | 19.19037317 |
| LDLRAP  | -0.452266381 | 4.92634824 | -7.680963415 | 3.35E-13 | 1.86E-12 | 19.18718164 |
| CCT5    | -0.512123962 | 5.71646644 | -7.680031062 | 3.37E-13 | 1.87E-12 | 19.18136762 |
| C2CD2   | -0.460266354 | 3.05235542 | -7.680015606 | 3.37E-13 | 1.87E-12 | 19.18127124 |
| RIMS4   | -1.255319844 | 2.21039311 | -7.677877637 | 3.41E-13 | 1.90E-12 | 19.16794085 |
| SNRPD1  | -0.389693016 | 4.4075621  | -7.676895578 | 3.43E-13 | 1.91E-12 | 19.16181842 |
| HLTF    | -0.69690703  | 4.54111337 | -7.676874337 | 3.43E-13 | 1.91E-12 | 19.161686   |
| ARL14EF | -0.436073039 | 4.16537324 | -7.676160817 | 3.45E-13 | 1.91E-12 | 19.15723803 |
| EIF5    | -0.619659266 | 5.8798786  | -7.676152355 | 3.45E-13 | 1.91E-12 | 19.15718528 |
| BRD2    | -0.581211761 | 6.79779094 | -7.675637291 | 3.46E-13 | 1.92E-12 | 19.15397462 |
| TEX2    | -0.745427143 | 4.89982884 | -7.675463346 | 3.47E-13 | 1.92E-12 | 19.15289036 |
| TUBG2   | -0.582481659 | 4.71883593 | -7.675277061 | 3.47E-13 | 1.92E-12 | 19.15172919 |
| ADCK1   | -0.4181087   | 2.92489258 | -7.674200836 | 3.49E-13 | 1.93E-12 | 19.14502115 |
| TMEM41  | -0.512144047 | 5.20746936 | -7.673908584 | 3.50E-13 | 1.94E-12 | 19.14319967 |
| CTNNB1  | -0.480975088 | 5.56671229 | -7.672685858 | 3.53E-13 | 1.95E-12 | 19.13557938 |
| SYN3    | -0.163567605 | 0.24537819 | -7.671782745 | 3.55E-13 | 1.96E-12 | 19.12995148 |
| GIMAP6  | -0.764471854 | 4.16268849 | -7.669756572 | 3.59E-13 | 1.99E-12 | 19.11732655 |
| FAHD1   | -0.400283468 | 4.74170048 | -7.668777284 | 3.62E-13 | 2.00E-12 | 19.11122542 |
| CCDC12  | -0.364498393 | 2.6982951  | -7.667151605 | 3.65E-13 | 2.02E-12 | 19.10109825 |
| FAM151A | -0.489840171 | 0.86618058 | -7.665611771 | 3.69E-13 | 2.04E-12 | 19.09150709 |
| ZNF487  | -0.417859035 | 2.36691364 | -7.665329177 | 3.70E-13 | 2.04E-12 | 19.08974703 |
| PGBD2   | -0.490499743 | 3.02892858 | -7.664997291 | 3.70E-13 | 2.05E-12 | 19.08768001 |
| STK33   | -0.511954445 | 3.05420556 | -7.662436091 | 3.76E-13 | 2.08E-12 | 19.07173054 |
| CCDC90  | -0.407003523 | 4.35648717 | -7.662416905 | 3.76E-13 | 2.08E-12 | 19.07161107 |
| BCL6B   | -0.783896971 | 3.64962632 | -7.661208811 | 3.79E-13 | 2.09E-12 | 19.06408902 |
| KIF19   | -0.946774273 | 0.88839314 | -7.660836885 | 3.80E-13 | 2.10E-12 | 19.06177342 |
| SLC16A1 | -0.638781949 | 1.54337777 | -7.659874764 | 3.83E-13 | 2.11E-12 | 19.0557836  |
| ZNF527  | -0.359089822 | 1.9016891  | -7.659549258 | 3.83E-13 | 2.11E-12 | 19.05375722 |
| GFM1    | -0.583306232 | 3.99808878 | -7.659212312 | 3.84E-13 | 2.12E-12 | 19.05165969 |
| SH2D3C  | -0.733056256 | 4.08880057 | -7.658403541 | 3.86E-13 | 2.13E-12 | 19.04662521 |

|         |              |            |              |          |          |             |
|---------|--------------|------------|--------------|----------|----------|-------------|
| TIGD1   | -0.500243431 | 2.72938303 | -7.652904138 | 4.00E-13 | 2.20E-12 | 19.01240107 |
| RHOBTB  | -0.800031767 | 2.73659988 | -7.651046524 | 4.04E-13 | 2.23E-12 | 19.00084416 |
| MORN1   | -0.451631311 | 2.2454081  | -7.650793991 | 4.05E-13 | 2.23E-12 | 18.99927319 |
| TIGD6   | -0.309458774 | 2.64094141 | -7.65017989  | 4.07E-13 | 2.24E-12 | 18.9954531  |
| RPS27L  | -0.399370611 | 5.20858306 | -7.65013776  | 4.07E-13 | 2.24E-12 | 18.99519104 |
| C9orf92 | -0.495207093 | 0.5216492  | -7.649152023 | 4.09E-13 | 2.25E-12 | 18.98905957 |
| ACSL1   | -0.672299581 | 5.16858839 | -7.646779431 | 4.16E-13 | 2.28E-12 | 18.97430363 |
| NEIL2   | -0.542481288 | 4.74469544 | -7.646405271 | 4.17E-13 | 2.29E-12 | 18.97197687 |
| KCTD10  | -0.575235374 | 5.12676196 | -7.645683611 | 4.18E-13 | 2.30E-12 | 18.96748932 |
| UBE2L3  | -0.392978805 | 5.96950104 | -7.64562986  | 4.19E-13 | 2.30E-12 | 18.96715509 |
| AAR2    | -0.427445213 | 5.43829303 | -7.645124141 | 4.20E-13 | 2.31E-12 | 18.96401052 |
| FAM13A  | -0.734319198 | 3.93883027 | -7.644922797 | 4.20E-13 | 2.31E-12 | 18.9627586  |
| MAGEL2  | -0.661216099 | 0.84922705 | -7.643985266 | 4.23E-13 | 2.32E-12 | 18.95692946 |
| ZNF830  | -0.438576598 | 4.52841508 | -7.643136564 | 4.25E-13 | 2.33E-12 | 18.95165301 |
| OLFM2   | -1.292157465 | 3.56617953 | -7.64211017  | 4.28E-13 | 2.35E-12 | 18.94527231 |
| RAB27B  | 1.092108013  | 1.15036712 | 7.64091509   | 4.31E-13 | 2.36E-12 | 18.93784364 |
| ZNF787  | -0.419277322 | 4.50400193 | -7.640157316 | 4.33E-13 | 2.37E-12 | 18.93313367 |
| EMG1    | -0.37086979  | 3.45325843 | -7.639632646 | 4.35E-13 | 2.38E-12 | 18.92987273 |
| COMMD1  | -0.378226612 | 4.98345648 | -7.639598025 | 4.35E-13 | 2.38E-12 | 18.92965755 |
| ITGAX   | 0.986646447  | 2.49472466 | 7.637741358  | 4.40E-13 | 2.41E-12 | 18.91811913 |
| ROMO1   | -0.62505715  | 7.87792422 | -7.636574945 | 4.43E-13 | 2.42E-12 | 18.91087124 |
| PEX3    | -0.581170814 | 4.84416646 | -7.636562789 | 4.43E-13 | 2.42E-12 | 18.91079571 |
| PRDM11  | -0.706456258 | 2.7315043  | -7.635724826 | 4.46E-13 | 2.44E-12 | 18.90558919 |
| SLC28A3 | 0.688076101  | 0.97601143 | 7.634253519  | 4.50E-13 | 2.46E-12 | 18.89644838 |
| ACY1    | -0.458741961 | 2.73281645 | -7.633414245 | 4.52E-13 | 2.47E-12 | 18.89123471 |
| CBX1    | -0.523805185 | 5.98652049 | -7.633341307 | 4.52E-13 | 2.47E-12 | 18.89078162 |
| FMOD    | -1.068237883 | 5.97128552 | -7.631847689 | 4.57E-13 | 2.49E-12 | 18.88150403 |
| SEC23B  | -0.722517034 | 5.90194616 | -7.631673664 | 4.57E-13 | 2.50E-12 | 18.88042314 |
| RAD17   | -0.440830426 | 4.50162052 | -7.631437576 | 4.58E-13 | 2.50E-12 | 18.87895681 |
| HSPB7   | -1.410301265 | 2.94968209 | -7.631034958 | 4.59E-13 | 2.50E-12 | 18.87645623 |
| MRPL17  | -0.391307896 | 6.36848163 | -7.631027814 | 4.59E-13 | 2.50E-12 | 18.87641186 |
| SLC24A3 | -0.958712782 | 1.99914798 | -7.630541288 | 4.61E-13 | 2.51E-12 | 18.87339026 |
| ZNF415  | -0.465920845 | 3.56376562 | -7.630115219 | 4.62E-13 | 2.52E-12 | 18.87074423 |
| PCED1A  | -0.562441212 | 6.05722967 | -7.629208668 | 4.64E-13 | 2.53E-12 | 18.86511455 |
| ST3GAL1 | -0.476353414 | 3.08926552 | -7.629099541 | 4.65E-13 | 2.53E-12 | 18.8644369  |
| CRLF2   | 1.15201025   | 1.24186374 | 7.627380496  | 4.70E-13 | 2.56E-12 | 18.85376289 |
| NPC1    | 0.63709712   | 3.45701326 | 7.624639736  | 4.78E-13 | 2.60E-12 | 18.8367479  |
| PEX16   | -0.431190634 | 5.18284442 | -7.623124727 | 4.83E-13 | 2.63E-12 | 18.82734419 |
| YY1     | -0.456581553 | 5.82241906 | -7.622141128 | 4.86E-13 | 2.64E-12 | 18.82123958 |
| MDM1    | -0.494278688 | 2.69162994 | -7.620226807 | 4.92E-13 | 2.67E-12 | 18.80935996 |

|         |              |            |              |          |          |             |
|---------|--------------|------------|--------------|----------|----------|-------------|
| CSRP1   | -0.483460657 | 6.71238898 | -7.619716701 | 4.93E-13 | 2.68E-12 | 18.80619473 |
| RTN4RL  | -0.523093631 | 1.12561926 | -7.619581974 | 4.94E-13 | 2.68E-12 | 18.80535877 |
| EXT1    | -0.596308447 | 4.06341082 | -7.619507891 | 4.94E-13 | 2.68E-12 | 18.80489909 |
| CCDC17  | -0.431182541 | 0.54143105 | -7.617663215 | 5.00E-13 | 2.71E-12 | 18.79345412 |
| PAGR1   | -0.463993913 | 4.1450348  | -7.61730542  | 5.01E-13 | 2.72E-12 | 18.79123444 |
| EFHC2   | -0.786162593 | 1.52527419 | -7.617214782 | 5.01E-13 | 2.72E-12 | 18.79067216 |
| CTSL    | -0.47807294  | 7.08596255 | -7.610871056 | 5.21E-13 | 2.83E-12 | 18.75132837 |
| FAM200  | -0.416053228 | 3.7513601  | -7.60951474  | 5.26E-13 | 2.85E-12 | 18.74291917 |
| IER3IP1 | -0.442889081 | 5.46288389 | -7.609376061 | 5.26E-13 | 2.85E-12 | 18.74205941 |
| FBXW5   | -0.393024804 | 6.76187076 | -7.608808918 | 5.28E-13 | 2.86E-12 | 18.73854343 |
| DNAJA3  | -0.48950911  | 4.58886514 | -7.608599606 | 5.29E-13 | 2.87E-12 | 18.73724584 |
| AQP9    | 0.735414316  | 1.03493604 | 7.608515598  | 5.29E-13 | 2.87E-12 | 18.73672506 |
| GOLGA8  | -0.543247551 | 0.54603069 | -7.608460474 | 5.29E-13 | 2.87E-12 | 18.73638334 |
| MMEL1   | -0.779885966 | 0.61585796 | -7.607491487 | 5.33E-13 | 2.88E-12 | 18.7303767  |
| DPH3    | -0.463637388 | 4.51550293 | -7.605753705 | 5.39E-13 | 2.91E-12 | 18.71960558 |
| FAM83F  | -0.616574861 | 2.98144825 | -7.605199164 | 5.40E-13 | 2.92E-12 | 18.71616876 |
| POMT2   | -0.495415924 | 3.19539274 | -7.604535348 | 5.43E-13 | 2.94E-12 | 18.71205489 |
| CCT7    | -0.428019584 | 7.31694189 | -7.601726729 | 5.52E-13 | 2.99E-12 | 18.69465156 |
| ANAPC5  | -0.363840528 | 4.74773529 | -7.601491692 | 5.53E-13 | 2.99E-12 | 18.69319535 |
| GTPBP6  | -0.43743332  | 5.84455188 | -7.60133807  | 5.54E-13 | 2.99E-12 | 18.69224358 |
| TDGF1   | -0.360411293 | 0.37555313 | -7.600592387 | 5.56E-13 | 3.01E-12 | 18.68762386 |
| ZNHIT2  | -0.562779296 | 5.23062148 | -7.599940402 | 5.59E-13 | 3.02E-12 | 18.68358486 |
| SLC6A2C | 1.270134979  | 1.20883966 | 7.597988456  | 5.66E-13 | 3.05E-12 | 18.67149399 |
| FAM118E | -0.441481385 | 3.65482714 | -7.596799315 | 5.70E-13 | 3.07E-12 | 18.66412909 |
| ZNF132  | -0.547150529 | 3.05948074 | -7.596762346 | 5.70E-13 | 3.07E-12 | 18.66390014 |
| RPL21   | -0.641847998 | 7.96710502 | -7.596515409 | 5.71E-13 | 3.08E-12 | 18.66237084 |
| OPLAH   | -0.727528564 | 2.58926313 | -7.59563583  | 5.74E-13 | 3.09E-12 | 18.65692381 |
| XXYLT1  | -0.443099316 | 2.91310721 | -7.593785957 | 5.81E-13 | 3.13E-12 | 18.64546925 |
| TSSK6   | -0.52200916  | 1.96351169 | -7.593163073 | 5.83E-13 | 3.14E-12 | 18.6416127  |
| CHKA    | -0.618976634 | 4.9884233  | -7.593159741 | 5.83E-13 | 3.14E-12 | 18.64159207 |
| ADAMTS  | -0.871912005 | 3.78629169 | -7.591983471 | 5.87E-13 | 3.16E-12 | 18.63430981 |
| WDR77   | -0.348415865 | 4.34371612 | -7.591937656 | 5.88E-13 | 3.16E-12 | 18.63402618 |
| RPN2    | -0.602906124 | 8.73983363 | -7.590994906 | 5.91E-13 | 3.18E-12 | 18.62819017 |
| C1GALT  | -0.576136704 | 1.55927802 | -7.590198597 | 5.94E-13 | 3.20E-12 | 18.62326105 |
| SLC25A4 | -0.631590994 | 0.61142365 | -7.589641758 | 5.96E-13 | 3.21E-12 | 18.61981443 |
| PA2G4   | -0.311348398 | 6.48308401 | -7.589449254 | 5.97E-13 | 3.21E-12 | 18.61862294 |
| EWSR1   | -0.442665474 | 5.8553439  | -7.588748996 | 5.99E-13 | 3.22E-12 | 18.61428892 |
| KIAA055 | -0.654481284 | 3.89547008 | -7.586945502 | 6.06E-13 | 3.26E-12 | 18.60312791 |
| HIST1H2 | -0.609807525 | 1.88267615 | -7.585980381 | 6.10E-13 | 3.28E-12 | 18.5971559  |
| APOA5   | -0.198579936 | 0.13597598 | -7.58357407  | 6.19E-13 | 3.33E-12 | 18.58226814 |

|         |              |            |              |          |          |             |
|---------|--------------|------------|--------------|----------|----------|-------------|
| FOXO6   | -0.710219271 | 3.44318672 | -7.583292548 | 6.20E-13 | 3.33E-12 | 18.58052656 |
| ANKRD3  | -0.381222478 | 0.87167616 | -7.583092734 | 6.21E-13 | 3.33E-12 | 18.57929049 |
| PHF11   | -0.473045858 | 4.42071389 | -7.5807145   | 6.31E-13 | 3.38E-12 | 18.56457995 |
| SCAMP3  | -0.429751044 | 6.34709822 | -7.579941941 | 6.34E-13 | 3.40E-12 | 18.55980193 |
| PTGS2   | 1.175599734  | 2.26217358 | 7.578990181  | 6.37E-13 | 3.42E-12 | 18.55391603 |
| TSPAN1  | -0.513757442 | 1.7065     | -7.578710586 | 6.39E-13 | 3.42E-12 | 18.55218704 |
| RETSAT  | -0.661231847 | 6.32175281 | -7.578695666 | 6.39E-13 | 3.42E-12 | 18.55209478 |
| GLT8D2  | -1.077284182 | 3.15101073 | -7.578033034 | 6.41E-13 | 3.43E-12 | 18.54799728 |
| LAMB3   | 2.062150824  | 5.30178186 | 7.575681284  | 6.51E-13 | 3.48E-12 | 18.53345669 |
| PRPF19  | -0.374273745 | 7.10985031 | -7.575611255 | 6.51E-13 | 3.49E-12 | 18.53302375 |
| SYPL2   | -0.859640863 | 3.10483112 | -7.575273348 | 6.53E-13 | 3.49E-12 | 18.53093476 |
| ABCF1   | -0.461630277 | 5.48048995 | -7.572903243 | 6.62E-13 | 3.54E-12 | 18.51628406 |
| SMYD3   | -0.529168002 | 2.50718712 | -7.572493505 | 6.64E-13 | 3.55E-12 | 18.51375157 |
| ARL5A   | -0.618191649 | 4.68281625 | -7.57110966  | 6.70E-13 | 3.58E-12 | 18.50519903 |
| TRAM1L  | -0.609849836 | 3.10550776 | -7.570559022 | 6.72E-13 | 3.59E-12 | 18.50179621 |
| P2RY8   | -0.862183609 | 3.37848128 | -7.570110844 | 6.74E-13 | 3.60E-12 | 18.49902669 |
| TMEM21  | -0.433772327 | 7.30230199 | -7.569843628 | 6.75E-13 | 3.61E-12 | 18.49737547 |
| HIST1H3 | -0.874446536 | 2.83918563 | -7.567196872 | 6.87E-13 | 3.67E-12 | 18.48102228 |
| TFEB    | -0.419534691 | 4.44710323 | -7.567119975 | 6.87E-13 | 3.67E-12 | 18.48054722 |
| NSMCE1  | -0.424028279 | 5.77583408 | -7.566274662 | 6.91E-13 | 3.68E-12 | 18.47532518 |
| BRSK2   | -0.402806171 | 0.49764071 | -7.565242049 | 6.95E-13 | 3.71E-12 | 18.46894657 |
| NDUFS5  | -0.485583528 | 9.67259968 | -7.561536898 | 7.11E-13 | 3.79E-12 | 18.44606382 |
| PTPN9   | -0.610400355 | 4.59889776 | -7.56132244  | 7.12E-13 | 3.80E-12 | 18.44473957 |
| HMGCS1  | -0.634836649 | 4.2664763  | -7.560926824 | 7.14E-13 | 3.81E-12 | 18.44229673 |
| SNAPC1  | -0.505385475 | 3.7578734  | -7.560644005 | 7.15E-13 | 3.81E-12 | 18.44055044 |
| PSKH1   | -0.512985465 | 4.81216854 | -7.559779917 | 7.19E-13 | 3.83E-12 | 18.43521532 |
| PODNL1  | 0.798698346  | 1.01230753 | 7.557192721  | 7.31E-13 | 3.89E-12 | 18.41924354 |
| EMC9    | -0.56038465  | 4.89708908 | -7.557090834 | 7.32E-13 | 3.89E-12 | 18.41861462 |
| AHR     | 0.942129729  | 5.50937884 | 7.556973417  | 7.32E-13 | 3.90E-12 | 18.41788985 |
| C7orf25 | -0.190772815 | 0.72094659 | -7.555111971 | 7.41E-13 | 3.94E-12 | 18.40640077 |
| COL11A1 | 1.280269168  | 1.01805246 | 7.552137773  | 7.55E-13 | 4.01E-12 | 18.38804736 |
| GVQW3   | -0.276825061 | 0.63968423 | -7.551573296 | 7.57E-13 | 4.03E-12 | 18.38456456 |
| EIF2S1  | -0.444232003 | 4.93356824 | -7.551515429 | 7.58E-13 | 4.03E-12 | 18.38420753 |
| GABRA6  | 0.153101097  | 0.15222032 | 7.55134318   | 7.58E-13 | 4.03E-12 | 18.3831448  |
| CHURC1  | -0.322408292 | 2.32322543 | -7.55053237  | 7.62E-13 | 4.05E-12 | 18.37814252 |
| PRR18   | -0.327925019 | 0.31249356 | -7.550388834 | 7.63E-13 | 4.05E-12 | 18.37725701 |
| TMEM50  | -0.412924535 | 6.7885315  | -7.549730159 | 7.66E-13 | 4.07E-12 | 18.37319362 |
| MSX2    | -0.507681796 | 0.96599369 | -7.549461041 | 7.68E-13 | 4.07E-12 | 18.37153349 |
| TMUB2   | -0.436477816 | 5.33621935 | -7.549215236 | 7.69E-13 | 4.08E-12 | 18.37001721 |
| LZTFL1  | -0.552663951 | 4.13344066 | -7.54838433  | 7.73E-13 | 4.10E-12 | 18.36489187 |

|         |              |            |              |          |          |             |
|---------|--------------|------------|--------------|----------|----------|-------------|
| CLCC1   | -0.537284766 | 3.87898749 | -7.547341632 | 7.78E-13 | 4.12E-12 | 18.35846062 |
| LSG1    | -0.444501563 | 4.57373164 | -7.546829666 | 7.80E-13 | 4.13E-12 | 18.35530307 |
| TCEANC  | -0.335819426 | 1.93572401 | -7.545648406 | 7.86E-13 | 4.16E-12 | 18.34801818 |
| C2CD4B  | 1.190207907  | 2.11464394 | 7.545502477  | 7.87E-13 | 4.17E-12 | 18.34711828 |
| IMMP2L  | -0.479072685 | 4.04799915 | -7.544124157 | 7.94E-13 | 4.20E-12 | 18.33861914 |
| MSI1    | -1.1433321   | 1.42652017 | -7.541414133 | 8.07E-13 | 4.27E-12 | 18.32191117 |
| BIRC3   | 1.221441349  | 2.59264747 | 7.537284447  | 8.28E-13 | 4.38E-12 | 18.29645795 |
| PAMR1   | -0.721134504 | 2.17242933 | -7.535704543 | 8.37E-13 | 4.43E-12 | 18.2867226  |
| SLC30A9 | -0.530220261 | 5.02293927 | -7.535262617 | 8.39E-13 | 4.44E-12 | 18.28399968 |
| TUBG1   | -0.391405698 | 5.12828024 | -7.534738997 | 8.42E-13 | 4.45E-12 | 18.28077355 |
| SARAF   | -0.599216412 | 8.77937207 | -7.533010937 | 8.51E-13 | 4.50E-12 | 18.27012761 |
| TSPAN11 | -1.211587974 | 4.31121794 | -7.531979516 | 8.57E-13 | 4.52E-12 | 18.26377414 |
| COL1A1  | 1.809327854  | 6.52060389 | 7.52816659   | 8.77E-13 | 4.63E-12 | 18.24029165 |
| VAV3    | -1.104393397 | 3.33540504 | -7.527606844 | 8.80E-13 | 4.65E-12 | 18.236845   |
| AFAP1L1 | -0.703693768 | 3.14861698 | -7.526397207 | 8.87E-13 | 4.68E-12 | 18.2293972  |
| ASF1A   | -0.491565754 | 5.12752026 | -7.526317714 | 8.87E-13 | 4.68E-12 | 18.22890778 |
| POLR3E  | -0.430831793 | 3.8574904  | -7.525579588 | 8.92E-13 | 4.70E-12 | 18.2243635  |
| TMEM25  | -0.453658188 | 6.69534568 | -7.524799889 | 8.96E-13 | 4.72E-12 | 18.21956359 |
| FNTB    | -0.360477689 | 3.15129355 | -7.524775124 | 8.96E-13 | 4.72E-12 | 18.21941114 |
| DDX31   | -0.508727951 | 3.97473553 | -7.52186274  | 9.13E-13 | 4.81E-12 | 18.201485   |
| HGH1    | -0.399710861 | 5.14458784 | -7.521318537 | 9.16E-13 | 4.82E-12 | 18.19813585 |
| YIF1A   | -0.45958572  | 6.32205153 | -7.521179025 | 9.16E-13 | 4.83E-12 | 18.19727728 |
| EMC6    | -0.670929846 | 3.25786061 | -7.521004848 | 9.18E-13 | 4.83E-12 | 18.1962054  |
| TRAPPC  | -0.357625843 | 6.24751394 | -7.519999704 | 9.23E-13 | 4.86E-12 | 18.19002008 |
| CYP26B1 | -0.99624621  | 1.9565035  | -7.519864121 | 9.24E-13 | 4.86E-12 | 18.18918578 |
| MSANTD  | -0.519931313 | 3.48191739 | -7.519525128 | 9.26E-13 | 4.87E-12 | 18.18709987 |
| ACRBP   | -0.834199192 | 3.17458298 | -7.517142067 | 9.40E-13 | 4.94E-12 | 18.17243798 |
| SLC7A6  | -0.569311829 | 2.11479962 | -7.515557835 | 9.49E-13 | 4.99E-12 | 18.16269257 |
| ATG101  | -0.507921352 | 4.79693179 | -7.514643285 | 9.55E-13 | 5.02E-12 | 18.15706729 |
| PARP3   | -0.502540729 | 5.0889776  | -7.513611884 | 9.61E-13 | 5.05E-12 | 18.15072382 |
| PITPNC1 | -0.681987523 | 3.11542942 | -7.512832023 | 9.66E-13 | 5.07E-12 | 18.14592777 |
| ATP6V1F | -0.329931725 | 8.29830854 | -7.510827099 | 9.78E-13 | 5.13E-12 | 18.13359918 |
| SLC26A3 | -0.372988412 | 0.2948542  | -7.509918531 | 9.83E-13 | 5.16E-12 | 18.12801295 |
| CENPO   | -0.425843759 | 2.24027869 | -7.507524715 | 9.98E-13 | 5.24E-12 | 18.11329689 |
| DNAH9   | -0.340001593 | 0.38418482 | -7.507387277 | 9.99E-13 | 5.24E-12 | 18.11245207 |
| CFAP65  | -0.371068776 | 0.46976273 | -7.506557708 | 1.00E-12 | 5.27E-12 | 18.10735303 |
| SPEF2   | -0.476140237 | 1.86376892 | -7.505600549 | 1.01E-12 | 5.30E-12 | 18.10147019 |
| DRAXIN  | 0.6120603    | 1.00152259 | 7.504848642  | 1.02E-12 | 5.32E-12 | 18.09684919 |
| ST3GAL3 | -0.464731489 | 3.67249742 | -7.503336865 | 1.02E-12 | 5.37E-12 | 18.08755915 |
| SLC26A9 | -0.607723853 | 1.05025612 | -7.502013155 | 1.03E-12 | 5.41E-12 | 18.07942578 |

|          |              |            |              |          |          |             |
|----------|--------------|------------|--------------|----------|----------|-------------|
| SYNGR1   | -0.826694238 | 2.67003658 | -7.500558936 | 1.04E-12 | 5.46E-12 | 18.07049156 |
| KIAA132  | -1.314490078 | 1.73863641 | -7.500394505 | 1.04E-12 | 5.46E-12 | 18.06948143 |
| PRELID3  | -0.561046418 | 5.82819201 | -7.499522895 | 1.05E-12 | 5.49E-12 | 18.06412717 |
| PBXIP1   | -0.766734961 | 8.45830548 | -7.499040576 | 1.05E-12 | 5.51E-12 | 18.06116448 |
| C1orf131 | -0.368827653 | 2.35240459 | -7.497484293 | 1.06E-12 | 5.56E-12 | 18.05160568 |
| TMBIM6   | -0.494867092 | 9.14604869 | -7.491383254 | 1.10E-12 | 5.77E-12 | 18.0141449  |
| DBNL     | -0.375807725 | 4.85964476 | -7.491381125 | 1.10E-12 | 5.77E-12 | 18.01413183 |
| RAB9B    | -0.579097602 | 1.75763477 | -7.490120572 | 1.11E-12 | 5.81E-12 | 18.00639438 |
| TNFAIP8  | -0.659930449 | 3.18778468 | -7.490038108 | 1.11E-12 | 5.82E-12 | 18.00588824 |
| RALB     | -0.486681026 | 5.93711931 | -7.488807362 | 1.12E-12 | 5.86E-12 | 17.9983346  |
| MYCL     | -0.935444922 | 2.16708091 | -7.486230853 | 1.14E-12 | 5.95E-12 | 17.982524   |
| HCN4     | 0.749780958  | 1.37842553 | 7.485989241  | 1.14E-12 | 5.96E-12 | 17.98104154 |
| PLA2G4f  | -1.015084271 | 1.60752786 | -7.48419045  | 1.16E-12 | 6.02E-12 | 17.97000565 |
| PSMD7    | -0.443023981 | 5.43898071 | -7.484146251 | 1.16E-12 | 6.02E-12 | 17.9697345  |
| KMT5B    | -0.544047248 | 4.65754868 | -7.483605505 | 1.16E-12 | 6.04E-12 | 17.96641727 |
| GOLGA8   | -0.667258541 | 0.66668332 | -7.481967959 | 1.17E-12 | 6.10E-12 | 17.95637262 |
| ROPN1B   | -0.317078469 | 0.42074902 | -7.480920302 | 1.18E-12 | 6.14E-12 | 17.94994707 |
| SELENO   | -0.518469516 | 6.65033744 | -7.480428561 | 1.18E-12 | 6.16E-12 | 17.94693129 |
| RPS26    | -0.833875043 | 7.58024471 | -7.479039713 | 1.19E-12 | 6.21E-12 | 17.93841437 |
| TPPP     | -0.864924296 | 2.60664007 | -7.478402082 | 1.20E-12 | 6.23E-12 | 17.93450452 |
| ZNF875   | -0.438127614 | 4.42508072 | -7.478083716 | 1.20E-12 | 6.24E-12 | 17.93255243 |
| TMEM18   | -0.410611723 | 4.55069432 | -7.476890798 | 1.21E-12 | 6.29E-12 | 17.92523843 |
| ZNF20    | -0.193074899 | 0.65695397 | -7.475619076 | 1.22E-12 | 6.34E-12 | 17.91744209 |
| CBWD1    | -0.376810254 | 1.80388186 | -7.474973466 | 1.22E-12 | 6.36E-12 | 17.91348448 |
| PDZK1IP  | 2.219263888  | 5.06054218 | 7.47495936   | 1.22E-12 | 6.36E-12 | 17.91339801 |
| SETD4    | -0.450009483 | 2.90277125 | -7.474852951 | 1.22E-12 | 6.36E-12 | 17.91274574 |
| IL1RN    | 1.237900801  | 3.31990519 | 7.474276256  | 1.23E-12 | 6.38E-12 | 17.9092108  |
| MTRF1    | -0.389503345 | 2.38532749 | -7.474248727 | 1.23E-12 | 6.38E-12 | 17.90904206 |
| IFT27    | -0.521784019 | 3.59390361 | -7.473458986 | 1.24E-12 | 6.41E-12 | 17.90420152 |
| CCNB1    | -0.45658709  | 3.99697946 | -7.472274808 | 1.24E-12 | 6.46E-12 | 17.89694397 |
| ZNF652   | -0.479087958 | 3.57523486 | -7.471437307 | 1.25E-12 | 6.49E-12 | 17.89181158 |
| SLC25A1  | -0.514052059 | 3.43253716 | -7.471150247 | 1.25E-12 | 6.50E-12 | 17.89005249 |
| EBF3     | -0.729724237 | 2.15232805 | -7.467477205 | 1.28E-12 | 6.65E-12 | 17.86754815 |
| EDA      | -1.161411636 | 2.78731221 | -7.465054124 | 1.30E-12 | 6.75E-12 | 17.85270607 |
| QPCTL    | -0.456709995 | 4.41711072 | -7.464342021 | 1.31E-12 | 6.77E-12 | 17.84834482 |
| 3-Mar    | -0.393071953 | 1.04378539 | -7.463661293 | 1.31E-12 | 6.80E-12 | 17.84417597 |
| WDR5B    | -0.460303186 | 3.62841142 | -7.463290105 | 1.32E-12 | 6.81E-12 | 17.84190288 |
| SNCA     | -0.708171919 | 1.91778849 | -7.461482214 | 1.33E-12 | 6.89E-12 | 17.83083271 |
| NKIRAS2  | -0.331414751 | 4.2215559  | -7.461241456 | 1.33E-12 | 6.90E-12 | 17.82935862 |
| SCEL     | 1.673640211  | 4.64785012 | 7.461134578  | 1.33E-12 | 6.90E-12 | 17.82870424 |

|          |              |            |              |          |          |             |
|----------|--------------|------------|--------------|----------|----------|-------------|
| ZMYND1   | -0.644144517 | 6.34850897 | -7.460615372 | 1.34E-12 | 6.92E-12 | 17.82552543 |
| TFF2     | -0.725918368 | 0.50175996 | -7.45932546  | 1.35E-12 | 6.97E-12 | 17.81762861 |
| CHID1    | -0.462607737 | 5.79187582 | -7.458310462 | 1.36E-12 | 7.02E-12 | 17.81141543 |
| NECTIN3  | -1.006659418 | 4.01654755 | -7.457421805 | 1.37E-12 | 7.05E-12 | 17.80597608 |
| RBM23    | -0.485405242 | 4.24680329 | -7.457402656 | 1.37E-12 | 7.05E-12 | 17.80585887 |
| TTC23L   | -0.30505448  | 0.62130675 | -7.45695475  | 1.37E-12 | 7.07E-12 | 17.80311746 |
| KDM4B    | -0.556845638 | 3.90198757 | -7.456413269 | 1.37E-12 | 7.09E-12 | 17.79980346 |
| N6AMT1   | -0.434377853 | 2.9584058  | -7.454694064 | 1.39E-12 | 7.16E-12 | 17.78928252 |
| KNTC1    | 0.425049085  | 1.85021625 | 7.454253904  | 1.39E-12 | 7.18E-12 | 17.78658914 |
| LRRC42   | -0.591202298 | 5.30208733 | -7.452116206 | 1.41E-12 | 7.28E-12 | 17.77350983 |
| UCHL5    | -0.477253368 | 2.86745487 | -7.451465998 | 1.42E-12 | 7.30E-12 | 17.76953207 |
| RSPO4    | 1.490912495  | 3.30569943 | 7.449570576  | 1.43E-12 | 7.39E-12 | 17.75793777 |
| TAF12    | -0.349484565 | 4.89603742 | -7.448883025 | 1.44E-12 | 7.42E-12 | 17.75373249 |
| TMEM47   | -0.904863015 | 4.08046195 | -7.448735085 | 1.44E-12 | 7.42E-12 | 17.75282768 |
| KIFC3    | -0.546031036 | 4.8674076  | -7.44797534  | 1.45E-12 | 7.46E-12 | 17.74818118 |
| SLC20A10 | 0.712199511  | 4.32511834 | 7.447805892  | 1.45E-12 | 7.46E-12 | 17.7471449  |
| GATA2    | -0.640034487 | 2.12964394 | -7.445631997 | 1.47E-12 | 7.56E-12 | 17.73385154 |
| SLC14A2  | -1.246806698 | 1.0278163  | -7.445588002 | 1.47E-12 | 7.56E-12 | 17.73358253 |
| ARMT1    | -0.605006216 | 5.3798077  | -7.445051963 | 1.47E-12 | 7.58E-12 | 17.73030505 |
| EPHA10   | 0.987282292  | 1.65832302 | 7.444728031  | 1.48E-12 | 7.60E-12 | 17.72832452 |
| C4orf46  | -0.457170685 | 2.81294057 | -7.443377847 | 1.49E-12 | 7.66E-12 | 17.72007004 |
| KLF2     | -0.982012578 | 5.24986895 | -7.441876128 | 1.50E-12 | 7.73E-12 | 17.71089028 |
| MEPCE    | -0.495210345 | 6.57318187 | -7.441394397 | 1.51E-12 | 7.75E-12 | 17.70794579 |
| PMF1     | -0.444613218 | 5.38142011 | -7.441046754 | 1.51E-12 | 7.76E-12 | 17.70582096 |
| NACA     | -0.366309344 | 7.78129533 | -7.440834243 | 1.51E-12 | 7.77E-12 | 17.70452211 |
| UPRT     | -0.400794574 | 4.08088485 | -7.440488227 | 1.52E-12 | 7.79E-12 | 17.70240732 |
| ACADSB   | -0.67810572  | 3.71455914 | -7.439745938 | 1.52E-12 | 7.82E-12 | 17.69787081 |
| ADO      | -0.495560811 | 4.46065273 | -7.439050322 | 1.53E-12 | 7.85E-12 | 17.69361981 |
| DMGDH    | -0.801756517 | 1.99466411 | -7.438753513 | 1.53E-12 | 7.86E-12 | 17.69180605 |
| VCAN     | 1.22185228   | 2.34834189 | 7.437398108  | 1.55E-12 | 7.93E-12 | 17.68352393 |
| GABARA   | -0.388063494 | 6.97643904 | -7.436037834 | 1.56E-12 | 7.99E-12 | 17.67521304 |
| BUD13    | -0.427827845 | 4.82048484 | -7.435691466 | 1.56E-12 | 8.01E-12 | 17.67309698 |
| SLC6A4   | -0.222558312 | 0.25413265 | -7.435570402 | 1.56E-12 | 8.01E-12 | 17.67235739 |
| STPG1    | -0.383066001 | 2.70256684 | -7.432910534 | 1.59E-12 | 8.14E-12 | 17.65610983 |
| SPN      | 0.839973453  | 1.8700315  | 7.431200037  | 1.61E-12 | 8.23E-12 | 17.64566339 |
| RXFP1    | -0.35380158  | 0.44577727 | -7.427615518 | 1.64E-12 | 8.41E-12 | 17.62377684 |
| TBC1D20  | -0.407416279 | 5.0630399  | -7.426956809 | 1.65E-12 | 8.44E-12 | 17.6197556  |
| SPIRE2   | -0.739681009 | 2.14820587 | -7.42676596  | 1.65E-12 | 8.45E-12 | 17.61859057 |
| PTRH2    | -0.335134352 | 3.1658525  | -7.425940039 | 1.66E-12 | 8.49E-12 | 17.61354894 |
| TXNDC9   | -0.486793079 | 4.57726067 | -7.425884276 | 1.66E-12 | 8.49E-12 | 17.61320857 |

|         |              |            |              |          |          |             |
|---------|--------------|------------|--------------|----------|----------|-------------|
| MISP    | 1.409114354  | 2.37636353 | 7.424605112  | 1.67E-12 | 8.55E-12 | 17.605401   |
| ZFYVE2  | -0.360488304 | 4.70926346 | -7.42410696  | 1.68E-12 | 8.58E-12 | 17.60236069 |
| CDH6    | 1.038760137  | 3.07654846 | 7.424039558  | 1.68E-12 | 8.58E-12 | 17.60194933 |
| CSF2    | 1.077760611  | 1.66621922 | 7.423333591  | 1.69E-12 | 8.61E-12 | 17.59764094 |
| INTS9   | -0.382215483 | 3.77334693 | -7.422306154 | 1.70E-12 | 8.67E-12 | 17.59137114 |
| RGS17   | -0.710705025 | 0.9695825  | -7.421900644 | 1.70E-12 | 8.69E-12 | 17.58889673 |
| ZFAND2  | -0.489616705 | 5.63252382 | -7.421384728 | 1.71E-12 | 8.71E-12 | 17.58574874 |
| DGUOK   | -0.461515761 | 6.2705394  | -7.421021034 | 1.71E-12 | 8.73E-12 | 17.58352966 |
| FIZ1    | -0.358098241 | 3.60163822 | -7.420748651 | 1.72E-12 | 8.74E-12 | 17.58186775 |
| ARMH3   | -0.455913883 | 4.49506162 | -7.420327267 | 1.72E-12 | 8.76E-12 | 17.57929683 |
| RBM14-F | -0.290817065 | 1.05443103 | -7.419388503 | 1.73E-12 | 8.81E-12 | 17.57356962 |
| DUOX1   | -0.962194113 | 6.40240071 | -7.417935563 | 1.75E-12 | 8.89E-12 | 17.56470645 |
| GRAMD1  | -0.841098424 | 2.53240939 | -7.416672226 | 1.76E-12 | 8.95E-12 | 17.5570008  |
| MMD     | -0.810229158 | 3.85101465 | -7.415950096 | 1.77E-12 | 8.99E-12 | 17.55259659 |
| CAP2    | -0.638484198 | 3.02747629 | -7.413683575 | 1.79E-12 | 9.12E-12 | 17.53877506 |
| TMED7   | -0.582242038 | 6.54627821 | -7.413548337 | 1.79E-12 | 9.12E-12 | 17.53795045 |
| PLOD1   | -0.519310157 | 6.30532729 | -7.412497292 | 1.81E-12 | 9.18E-12 | 17.53154204 |
| MRPL37  | -0.410909677 | 5.84478459 | -7.41208     | 1.81E-12 | 9.20E-12 | 17.52899791 |
| SRSF3   | -0.464049765 | 6.37967459 | -7.41045265  | 1.83E-12 | 9.29E-12 | 17.51907719 |
| PDE8A   | -0.509998989 | 3.41713562 | -7.403481052 | 1.91E-12 | 9.70E-12 | 17.47659257 |
| NCS1    | -0.647318474 | 5.05500439 | -7.403358158 | 1.91E-12 | 9.70E-12 | 17.47584389 |
| IVL     | 1.489867447  | 1.66600443 | 7.400942393  | 1.94E-12 | 9.85E-12 | 17.4611285  |
| PPP2R2  | -0.319781742 | 3.86309649 | -7.400642451 | 1.94E-12 | 9.86E-12 | 17.45930165 |
| AKR1A1  | -0.411168605 | 7.02735077 | -7.400489722 | 1.95E-12 | 9.87E-12 | 17.45837145 |
| EML6    | -0.554800377 | 1.29506656 | -7.400068009 | 1.95E-12 | 9.89E-12 | 17.45580305 |
| THSD7B  | -0.497057227 | 0.80147589 | -7.399931246 | 1.95E-12 | 9.90E-12 | 17.45497012 |
| HDGFL3  | -0.437728338 | 3.72870288 | -7.398742317 | 1.97E-12 | 9.97E-12 | 17.44772966 |
| CLPTM1  | -0.469778759 | 6.49077137 | -7.39765582  | 1.98E-12 | 1.00E-11 | 17.44111366 |
| CD55    | 1.409947294  | 6.82095924 | 7.397321958  | 1.98E-12 | 1.00E-11 | 17.4390808  |
| UPF3A   | -0.490872283 | 4.80327266 | -7.394918336 | 2.01E-12 | 1.02E-11 | 17.42444709 |
| GHR     | -0.575714517 | 1.2919702  | -7.391400595 | 2.06E-12 | 1.04E-11 | 17.40303595 |
| SDR16C  | 0.753032607  | 0.7610333  | 7.389771932  | 2.08E-12 | 1.05E-11 | 17.39312513 |
| UBALD1  | -0.42908058  | 4.88524762 | -7.389510853 | 2.08E-12 | 1.05E-11 | 17.39153653 |
| NOP56   | -0.428887411 | 5.28277872 | -7.387756318 | 2.10E-12 | 1.06E-11 | 17.38086159 |
| HLA-G   | 1.509434486  | 3.72214429 | 7.386853251  | 2.12E-12 | 1.07E-11 | 17.37536778 |
| MACROD1 | -0.562186043 | 5.86040622 | -7.386601923 | 2.12E-12 | 1.07E-11 | 17.3738389  |
| GALK2   | -0.478171171 | 2.78350775 | -7.386445887 | 2.12E-12 | 1.07E-11 | 17.37288972 |
| RPL19   | -0.408828145 | 10.4111341 | -7.383991062 | 2.15E-12 | 1.09E-11 | 17.35795853 |
| ZFP41   | -0.408418002 | 2.3172182  | -7.383314539 | 2.16E-12 | 1.09E-11 | 17.35384422 |
| RCHY1   | -0.523130016 | 3.75499468 | -7.382335658 | 2.18E-12 | 1.10E-11 | 17.34789154 |



|         |              |            |              |          |          |             |
|---------|--------------|------------|--------------|----------|----------|-------------|
| ING4    | -0.468954908 | 5.67061657 | -7.382047229 | 2.18E-12 | 1.10E-11 | 17.34613767 |
| TMEM18  | -0.431235203 | 2.0586931  | -7.381160398 | 2.19E-12 | 1.11E-11 | 17.34074533 |
| SCRN2   | -0.514162109 | 6.12222474 | -7.380852199 | 2.20E-12 | 1.11E-11 | 17.33887143 |
| LAMTOR  | -0.40885923  | 6.30280635 | -7.379424978 | 2.22E-12 | 1.12E-11 | 17.33019439 |
| PDCL3   | -0.40279676  | 4.87958974 | -7.377380729 | 2.24E-12 | 1.13E-11 | 17.31776791 |
| HSD17B  | -0.543823112 | 5.00473388 | -7.374528044 | 2.28E-12 | 1.15E-11 | 17.30043088 |
| FAM210  | -0.431692692 | 3.52428843 | -7.374502284 | 2.28E-12 | 1.15E-11 | 17.30027434 |
| TAF6L   | -0.413201224 | 3.98559086 | -7.372134146 | 2.32E-12 | 1.17E-11 | 17.28588545 |
| GAMT    | -0.557518639 | 5.71224635 | -7.367149067 | 2.39E-12 | 1.20E-11 | 17.25560572 |
| FAM81A  | -0.662529644 | 1.87274877 | -7.366442117 | 2.40E-12 | 1.21E-11 | 17.25131274 |
| LETM1   | -0.470370038 | 4.23988914 | -7.364877775 | 2.43E-12 | 1.22E-11 | 17.24181414 |
| BOP1    | -0.55511547  | 5.22699467 | -7.364387549 | 2.43E-12 | 1.22E-11 | 17.23883778 |
| ARL14EF | 0.339605306  | 0.34053593 | 7.362702668  | 2.46E-12 | 1.24E-11 | 17.22860919 |
| FCSK    | -0.377024876 | 3.95134642 | -7.360924419 | 2.49E-12 | 1.25E-11 | 17.21781543 |
| FAM219  | -0.456024706 | 3.88370604 | -7.359956714 | 2.50E-12 | 1.26E-11 | 17.21194228 |
| MIS12   | -0.483264141 | 4.15970158 | -7.359736925 | 2.50E-12 | 1.26E-11 | 17.21060841 |
| TGM2    | 1.089224286  | 5.23105868 | 7.359528026  | 2.51E-12 | 1.26E-11 | 17.20934066 |
| HSD17B  | -0.619356695 | 0.86506343 | -7.359395967 | 2.51E-12 | 1.26E-11 | 17.20853925 |
| PDZD9   | -0.147354908 | 0.26664684 | -7.359047584 | 2.51E-12 | 1.26E-11 | 17.20642509 |
| COG7    | -0.409130186 | 4.72669449 | -7.358980142 | 2.52E-12 | 1.26E-11 | 17.20601582 |
| PNO1    | -0.481077235 | 4.49076981 | -7.358450188 | 2.52E-12 | 1.27E-11 | 17.20279994 |
| NMNAT3  | -0.553014877 | 2.29633099 | -7.356461189 | 2.55E-12 | 1.28E-11 | 17.19073159 |
| BRD7    | -0.382787241 | 4.66245295 | -7.356092501 | 2.56E-12 | 1.28E-11 | 17.18849479 |
| BAG1    | -0.446832457 | 5.43369142 | -7.355073898 | 2.58E-12 | 1.29E-11 | 17.18231538 |
| TMEM18  | 0.857871789  | 1.95180017 | 7.349878011  | 2.66E-12 | 1.33E-11 | 17.15080293 |
| AP4B1   | -0.449674316 | 3.11831304 | -7.346698743 | 2.71E-12 | 1.36E-11 | 17.13152818 |
| AGPAT1  | -0.474470152 | 6.07914058 | -7.345008212 | 2.74E-12 | 1.37E-11 | 17.12128131 |
| SRSF1   | -0.432747986 | 6.8072736  | -7.344443295 | 2.75E-12 | 1.38E-11 | 17.1178575  |
| BTBD6   | -0.399456394 | 5.88366371 | -7.342516686 | 2.78E-12 | 1.39E-11 | 17.10618214 |
| P4HTM   | -0.486734186 | 5.1114451  | -7.340938237 | 2.81E-12 | 1.41E-11 | 17.09661813 |
| TMED2   | -0.572077937 | 7.75841895 | -7.337865643 | 2.87E-12 | 1.43E-11 | 17.07800476 |
| FAH     | -0.47230869  | 3.90617262 | -7.337083556 | 2.88E-12 | 1.44E-11 | 17.07326779 |
| WSB2    | -0.507306897 | 5.71057272 | -7.337053056 | 2.88E-12 | 1.44E-11 | 17.07308307 |
| PIGK    | -0.523902556 | 4.44605625 | -7.335909741 | 2.90E-12 | 1.45E-11 | 17.06615881 |
| CLDND2  | -0.570889408 | 1.92383233 | -7.334689243 | 2.92E-12 | 1.46E-11 | 17.05876788 |
| ZNF329  | -0.508392905 | 3.61718236 | -7.333374379 | 2.95E-12 | 1.47E-11 | 17.05080641 |
| CENPT   | -0.52233373  | 3.36291421 | -7.333236259 | 2.95E-12 | 1.47E-11 | 17.04997014 |
| TRPM3   | -0.350214031 | 0.25998309 | -7.33276726  | 2.96E-12 | 1.48E-11 | 17.04713063 |
| SYT9    | -0.460655122 | 0.57761087 | -7.332742394 | 2.96E-12 | 1.48E-11 | 17.04698008 |
| AQP7    | -0.689738413 | 0.80435795 | -7.331189382 | 2.99E-12 | 1.49E-11 | 17.03757835 |

|         |              |            |              |          |          |             |
|---------|--------------|------------|--------------|----------|----------|-------------|
| LIMS2   | -0.66758547  | 3.22813953 | -7.330525913 | 3.00E-12 | 1.50E-11 | 17.03356218 |
| TIGD7   | -0.365231158 | 2.02618618 | -7.327842099 | 3.05E-12 | 1.52E-11 | 17.01731874 |
| MBD3    | -0.454452465 | 4.94621845 | -7.327414719 | 3.06E-12 | 1.52E-11 | 17.01473243 |
| CACNB4  | -0.610131289 | 0.7944697  | -7.327317785 | 3.06E-12 | 1.52E-11 | 17.01414585 |
| IMPACT  | -0.577919451 | 4.73312661 | -7.327074981 | 3.06E-12 | 1.53E-11 | 17.01267656 |
| VAPA    | -0.407422799 | 5.46648398 | -7.326978771 | 3.06E-12 | 1.53E-11 | 17.01209438 |
| TBKBP1  | -0.521905412 | 3.67853849 | -7.3268645   | 3.07E-12 | 1.53E-11 | 17.01140291 |
| DCTN5   | -0.442123773 | 4.07872135 | -7.325971361 | 3.08E-12 | 1.54E-11 | 17.00599862 |
| RAG2    | -1.369695515 | 0.89359175 | -7.324721928 | 3.11E-12 | 1.55E-11 | 16.99843917 |
| KAT8    | -0.388552752 | 5.27886575 | -7.324001005 | 3.12E-12 | 1.55E-11 | 16.99407774 |
| ILF2    | -0.502405856 | 7.63901437 | -7.323897822 | 3.12E-12 | 1.55E-11 | 16.99345353 |
| SSBP3   | -0.528574469 | 4.82507498 | -7.322366512 | 3.15E-12 | 1.57E-11 | 16.98419046 |
| PNRC2   | -0.460564136 | 6.7967686  | -7.321100215 | 3.18E-12 | 1.58E-11 | 16.97653144 |
| ZBED3   | -0.574529268 | 4.47598276 | -7.320375518 | 3.19E-12 | 1.59E-11 | 16.97214859 |
| TERF1   | -0.461966659 | 2.99326535 | -7.32025912  | 3.19E-12 | 1.59E-11 | 16.97144466 |
| MEN1    | -0.414283872 | 5.0343624  | -7.319544237 | 3.21E-12 | 1.59E-11 | 16.9671215  |
| FRG1    | -0.424188324 | 5.3795221  | -7.3183826   | 3.23E-12 | 1.60E-11 | 16.96009723 |
| BNC1    | 0.835406894  | 1.07118884 | 7.317094615  | 3.26E-12 | 1.62E-11 | 16.95230981 |
| AP3B1   | -0.541232033 | 4.93969967 | -7.316876831 | 3.26E-12 | 1.62E-11 | 16.95099313 |
| RPS13   | -0.425912796 | 8.76127314 | -7.316449242 | 3.27E-12 | 1.62E-11 | 16.94840809 |
| SFMBT1  | -0.478705453 | 2.45226429 | -7.315702539 | 3.29E-12 | 1.63E-11 | 16.94389403 |
| NOL10   | -0.352833134 | 4.45854071 | -7.31525715  | 3.29E-12 | 1.63E-11 | 16.94120165 |
| DCP1B   | -0.39388775  | 3.87396559 | -7.308192786 | 3.44E-12 | 1.71E-11 | 16.89851195 |
| CLK3    | -0.385925413 | 3.23533946 | -7.307295684 | 3.46E-12 | 1.71E-11 | 16.89309272 |
| RARS2   | -0.392899578 | 5.19767377 | -7.306590474 | 3.47E-12 | 1.72E-11 | 16.88883298 |
| MAFB    | -0.813320219 | 5.36129911 | -7.306419257 | 3.48E-12 | 1.72E-11 | 16.88779881 |
| LETMD1  | -0.442413513 | 5.24362578 | -7.3061203   | 3.48E-12 | 1.73E-11 | 16.8859931  |
| SCYL1   | -0.337824876 | 6.41286222 | -7.305469146 | 3.50E-12 | 1.73E-11 | 16.88206029 |
| IFT74   | -0.485283404 | 4.14070751 | -7.305465017 | 3.50E-12 | 1.73E-11 | 16.88203535 |
| HID1    | -0.566887755 | 3.83868992 | -7.304889846 | 3.51E-12 | 1.74E-11 | 16.87856165 |
| ELMOD3  | -0.435600236 | 3.16324305 | -7.301955024 | 3.58E-12 | 1.77E-11 | 16.86083978 |
| CFAP157 | -0.277200662 | 0.82655018 | -7.301386286 | 3.59E-12 | 1.77E-11 | 16.857406   |
| RAD9A   | -0.504344217 | 3.59143787 | -7.299110035 | 3.64E-12 | 1.80E-11 | 16.84366481 |
| RPA2    | -0.485450031 | 6.71374023 | -7.297717944 | 3.67E-12 | 1.81E-11 | 16.83526246 |
| COL4A6  | -0.413345694 | 0.45368968 | -7.297690781 | 3.67E-12 | 1.81E-11 | 16.83509852 |
| GIMAP1  | -0.610528797 | 2.73342464 | -7.297409487 | 3.68E-12 | 1.82E-11 | 16.83340083 |
| BANF1   | -0.417089267 | 7.91773327 | -7.295609613 | 3.72E-12 | 1.84E-11 | 16.82253905 |
| ZNF280E | -0.500909525 | 1.76293275 | -7.294799207 | 3.74E-12 | 1.84E-11 | 16.81764903 |
| ACOT1   | -0.528569113 | 2.42289919 | -7.294671939 | 3.74E-12 | 1.84E-11 | 16.81688113 |
| TMEM26  | -0.534804487 | 5.46916123 | -7.292935303 | 3.78E-12 | 1.86E-11 | 16.80640352 |

|         |              |            |              |          |          |             |
|---------|--------------|------------|--------------|----------|----------|-------------|
| KSR1    | -0.655231781 | 3.01257844 | -7.291655862 | 3.81E-12 | 1.88E-11 | 16.79868533 |
| ZNF174  | -0.411630732 | 3.66237695 | -7.291523827 | 3.81E-12 | 1.88E-11 | 16.79788889 |
| DUSP5   | 1.491350949  | 6.65385347 | 7.291521384  | 3.81E-12 | 1.88E-11 | 16.79787415 |
| MMADHC  | -0.535486074 | 6.20705986 | -7.291088058 | 3.82E-12 | 1.88E-11 | 16.79526036 |
| NUTF2   | -0.364735529 | 5.78262151 | -7.290834376 | 3.83E-12 | 1.89E-11 | 16.79373022 |
| IBA57   | -0.382993523 | 1.77789108 | -7.290482732 | 3.84E-12 | 1.89E-11 | 16.79160925 |
| RAB20   | -0.682278036 | 6.05150659 | -7.290155168 | 3.84E-12 | 1.89E-11 | 16.78963359 |
| TMEM14  | -0.3399298   | 2.70643728 | -7.288558347 | 3.88E-12 | 1.91E-11 | 16.78000337 |
| CD274   | 0.812576076  | 2.7011023  | 7.287583924  | 3.91E-12 | 1.92E-11 | 16.77412742 |
| HDAC8   | -0.339424338 | 3.84372812 | -7.287441383 | 3.91E-12 | 1.92E-11 | 16.77326792 |
| RPS3A   | -0.509751045 | 8.98419591 | -7.285796224 | 3.95E-12 | 1.94E-11 | 16.76334862 |
| RUNX2   | 1.068458374  | 2.32241481 | 7.284036137  | 3.99E-12 | 1.96E-11 | 16.752738   |
| TMUB1   | -0.409570865 | 5.97887036 | -7.283881135 | 4.00E-12 | 1.96E-11 | 16.75180366 |
| DEPDC1  | 1.218715743  | 2.40789228 | 7.283509699  | 4.00E-12 | 1.97E-11 | 16.74956471 |
| PAICS   | -0.481011146 | 4.62952376 | -7.283008561 | 4.02E-12 | 1.97E-11 | 16.74654407 |
| GNAS    | -0.751150577 | 9.66153818 | -7.282714918 | 4.02E-12 | 1.98E-11 | 16.74477418 |
| POMT1   | -0.441519373 | 4.05937398 | -7.282040236 | 4.04E-12 | 1.98E-11 | 16.74070781 |
| MRPL50  | -0.406980165 | 4.43162164 | -7.281473665 | 4.06E-12 | 1.99E-11 | 16.73729323 |
| CCDC12  | -0.475292185 | 4.99270023 | -7.280987886 | 4.07E-12 | 1.99E-11 | 16.7343657  |
| ABTB2   | 1.048362863  | 3.47323415 | 7.280644042  | 4.08E-12 | 2.00E-11 | 16.73229362 |
| ARL2    | -0.457787752 | 5.70986448 | -7.280481716 | 4.08E-12 | 2.00E-11 | 16.73131542 |
| CRLS1   | -0.349125206 | 4.68580004 | -7.279507007 | 4.10E-12 | 2.01E-11 | 16.72544202 |
| SIKE1   | -0.46189946  | 3.69667967 | -7.279238789 | 4.11E-12 | 2.01E-11 | 16.72382589 |
| ERMARC  | -0.401518175 | 3.96610358 | -7.27862934  | 4.13E-12 | 2.02E-11 | 16.72015382 |
| FAM171E | -0.941497709 | 2.05498771 | -7.275081696 | 4.22E-12 | 2.07E-11 | 16.69878249 |
| ZNF491  | -0.371967079 | 1.19783847 | -7.273625798 | 4.26E-12 | 2.08E-11 | 16.69001401 |
| ITFG1   | -0.603241029 | 5.01229362 | -7.273288416 | 4.26E-12 | 2.09E-11 | 16.68798221 |
| PSAT1   | -1.308366469 | 3.69702572 | -7.272912775 | 4.27E-12 | 2.09E-11 | 16.68572008 |
| TMEM12  | -0.376999696 | 5.08443918 | -7.272332427 | 4.29E-12 | 2.10E-11 | 16.68222535 |
| SLPI    | 2.106299394  | 7.03913718 | 7.272064658  | 4.30E-12 | 2.10E-11 | 16.68061296 |
| LRMDA   | -0.328109146 | 3.23586391 | -7.267388419 | 4.42E-12 | 2.16E-11 | 16.65246098 |
| POLR1D  | -0.346503974 | 4.77953958 | -7.267132113 | 4.43E-12 | 2.16E-11 | 16.65091831 |
| CCT2    | -0.450430456 | 5.95018147 | -7.265317037 | 4.48E-12 | 2.19E-11 | 16.63999461 |
| TMEM20  | -0.405183347 | 2.78586605 | -7.26404548  | 4.51E-12 | 2.20E-11 | 16.63234305 |
| SPON1   | 1.18867817   | 1.70798096 | 7.263765078  | 4.52E-12 | 2.21E-11 | 16.63065585 |
| SLCO4A  | 0.889935083  | 1.98895099 | 7.261420639  | 4.59E-12 | 2.24E-11 | 16.61655091 |
| SUGP2   | -0.560889011 | 4.74836503 | -7.25852839  | 4.67E-12 | 2.28E-11 | 16.59915428 |
| ZPR1    | -0.394112916 | 4.0948375  | -7.257246417 | 4.71E-12 | 2.30E-11 | 16.59144478 |
| PDCD4   | -0.643880331 | 7.77808543 | -7.256584447 | 4.72E-12 | 2.30E-11 | 16.58746419 |
| PAPOLA  | -0.454474651 | 5.0634252  | -7.255526222 | 4.76E-12 | 2.32E-11 | 16.58110132 |

|         |              |            |              |          |          |             |
|---------|--------------|------------|--------------|----------|----------|-------------|
| KIF1A   | -1.055474853 | 1.00114434 | -7.253849452 | 4.80E-12 | 2.34E-11 | 16.57102052 |
| PARP1   | -0.546956942 | 5.45963227 | -7.253445872 | 4.82E-12 | 2.35E-11 | 16.56859441 |
| KRT222  | -0.87130092  | 1.14973922 | -7.2513538   | 4.88E-12 | 2.38E-11 | 16.55601941 |
| ZFAND3  | -0.516369515 | 6.2579057  | -7.250867965 | 4.89E-12 | 2.38E-11 | 16.5530995  |
| ZNF843  | -0.353875415 | 1.18187669 | -7.250802068 | 4.89E-12 | 2.38E-11 | 16.55270346 |
| EEPDI   | -0.391534124 | 1.59027587 | -7.250742393 | 4.90E-12 | 2.38E-11 | 16.55234482 |
| TLK2    | -0.378279591 | 3.53618516 | -7.25059007  | 4.90E-12 | 2.38E-11 | 16.55142939 |
| TNC     | 1.53553893   | 4.13576414 | 7.248828656  | 4.95E-12 | 2.41E-11 | 16.54084448 |
| PRICKLE | -0.580144704 | 2.98932581 | -7.246989563 | 5.01E-12 | 2.44E-11 | 16.52979459 |
| GJB6    | -1.122697975 | 2.15599552 | -7.246585965 | 5.02E-12 | 2.44E-11 | 16.52736989 |
| CDC37L  | -0.403688662 | 4.54181226 | -7.245413596 | 5.06E-12 | 2.46E-11 | 16.52032712 |
| BDH2    | -0.500987615 | 6.26513733 | -7.244779549 | 5.08E-12 | 2.47E-11 | 16.51651852 |
| COL9A1  | -0.299135088 | 0.38872172 | -7.244709048 | 5.08E-12 | 2.47E-11 | 16.51609504 |
| ZNF680  | -0.599917252 | 4.16079678 | -7.243714248 | 5.11E-12 | 2.48E-11 | 16.51011996 |
| ITGA2   | 1.260803473  | 4.05388802 | 7.243283771  | 5.13E-12 | 2.49E-11 | 16.50753454 |
| WDR59   | -0.440586975 | 3.93883901 | -7.241362859 | 5.19E-12 | 2.52E-11 | 16.4959989  |
| UTP11   | -0.352025773 | 4.556406   | -7.24037588  | 5.22E-12 | 2.53E-11 | 16.4900726  |
| CPSF4   | -0.36534628  | 3.87748625 | -7.239954796 | 5.23E-12 | 2.54E-11 | 16.48754436 |
| ZNF34   | -0.433260384 | 3.66765866 | -7.238961284 | 5.26E-12 | 2.55E-11 | 16.48157958 |
| ARSJ    | 0.849003891  | 1.54042544 | 7.238676103  | 5.27E-12 | 2.56E-11 | 16.47986754 |
| NDRG3   | -0.424601425 | 5.47465806 | -7.23723985  | 5.32E-12 | 2.58E-11 | 16.47124584 |
| CITED2  | -0.98013425  | 7.36000447 | -7.237178875 | 5.32E-12 | 2.58E-11 | 16.47087984 |
| TRIM61  | -0.570767877 | 1.46811486 | -7.237092725 | 5.32E-12 | 2.58E-11 | 16.47036273 |
| GPATCH  | -0.36990767  | 4.46743669 | -7.23614821  | 5.35E-12 | 2.59E-11 | 16.46469359 |
| AOX1    | -0.99985691  | 1.36157477 | -7.23457321  | 5.41E-12 | 2.62E-11 | 16.45524125 |
| CBX4    | -0.542566048 | 5.30271222 | -7.233848836 | 5.43E-12 | 2.63E-11 | 16.45089438 |
| MMUT    | -0.524802917 | 5.00172787 | -7.232520373 | 5.47E-12 | 2.65E-11 | 16.44292321 |
| DEGS2   | -0.713983328 | 3.17093012 | -7.231311666 | 5.51E-12 | 2.67E-11 | 16.43567144 |
| MFAP1   | -0.560031905 | 5.80730413 | -7.230768512 | 5.53E-12 | 2.68E-11 | 16.432413   |
| GEMIN2  | -0.349360568 | 2.9254044  | -7.229892572 | 5.56E-12 | 2.69E-11 | 16.42715846 |
| CRYL1   | -0.536375055 | 5.9575764  | -7.226172874 | 5.69E-12 | 2.75E-11 | 16.40484965 |
| TINCR   | 1.034268717  | 1.13537961 | 7.225134118  | 5.73E-12 | 2.77E-11 | 16.39862109 |
| LRRC2   | -0.917031076 | 4.03747404 | -7.224406049 | 5.75E-12 | 2.78E-11 | 16.39425581 |
| ST8SIA4 | 0.746453676  | 3.08326008 | 7.224374     | 5.75E-12 | 2.78E-11 | 16.39406366 |
| ZNF768  | -0.353128468 | 5.98631569 | -7.223826579 | 5.77E-12 | 2.79E-11 | 16.3907817  |
| ACTR6   | -0.436983699 | 4.17788984 | -7.223034542 | 5.80E-12 | 2.80E-11 | 16.38603347 |
| YIPF6   | -0.486208807 | 4.61935278 | -7.22275781  | 5.81E-12 | 2.80E-11 | 16.38437455 |
| SRRD    | -0.534112572 | 3.64785513 | -7.221706069 | 5.85E-12 | 2.82E-11 | 16.37807009 |
| VCP     | -0.445957689 | 7.45317572 | -7.21891458  | 5.95E-12 | 2.87E-11 | 16.36134001 |
| LRRC4B  | -0.569245652 | 1.35450732 | -7.218759685 | 5.95E-12 | 2.87E-11 | 16.36041181 |

|          |              |            |              |          |          |             |
|----------|--------------|------------|--------------|----------|----------|-------------|
| KRT19    | 1.947011738  | 7.38285732 | 7.218008968  | 5.98E-12 | 2.88E-11 | 16.35591336 |
| KLHDC7   | -0.721803797 | 2.84262308 | -7.216722652 | 6.03E-12 | 2.90E-11 | 16.34820623 |
| VPS54    | -0.467466953 | 4.41891664 | -7.216651626 | 6.03E-12 | 2.90E-11 | 16.34778069 |
| NOSIP    | -0.492352075 | 5.11563496 | -7.215623172 | 6.07E-12 | 2.92E-11 | 16.34161926 |
| TGIF2    | -0.525759163 | 4.38613123 | -7.214311526 | 6.12E-12 | 2.94E-11 | 16.33376209 |
| FGFBP2   | -0.492544635 | 0.74450956 | -7.211986735 | 6.21E-12 | 2.99E-11 | 16.31983816 |
| RPAP2    | -0.399592918 | 2.16951531 | -7.211402396 | 6.23E-12 | 3.00E-11 | 16.31633883 |
| ZNF222   | -0.397731188 | 2.41562303 | -7.210610841 | 6.26E-12 | 3.01E-11 | 16.31159888 |
| NRN1     | -0.584729531 | 2.69021514 | -7.210471931 | 6.26E-12 | 3.01E-11 | 16.3107671  |
| HSPA9    | -0.585061082 | 7.25584604 | -7.21044118  | 6.26E-12 | 3.01E-11 | 16.31058297 |
| CC2D2A   | -0.563149356 | 2.8079583  | -7.210369317 | 6.27E-12 | 3.01E-11 | 16.31015267 |
| ZKSCAN   | -0.400435855 | 2.23488226 | -7.210282631 | 6.27E-12 | 3.01E-11 | 16.30963362 |
| KHDC1    | -0.542874308 | 2.03809622 | -7.208968632 | 6.32E-12 | 3.04E-11 | 16.30176619 |
| LIN7B    | -0.526576864 | 3.16912734 | -7.205984843 | 6.44E-12 | 3.09E-11 | 16.28390461 |
| C12orf65 | -0.338933884 | 3.5360212  | -7.20585985  | 6.44E-12 | 3.09E-11 | 16.28315648 |
| ZNF2     | -0.375304475 | 2.42312482 | -7.205818261 | 6.44E-12 | 3.09E-11 | 16.28290756 |
| GTF2IRC  | -0.414333581 | 2.2560851  | -7.205609512 | 6.45E-12 | 3.09E-11 | 16.28165814 |
| GOLGA7   | -0.395655833 | 5.55702095 | -7.204291801 | 6.50E-12 | 3.12E-11 | 16.27377188 |
| MRTFA    | -0.442392047 | 4.4982667  | -7.204177043 | 6.51E-12 | 3.12E-11 | 16.27308511 |
| DHRS11   | -0.441593256 | 3.71045355 | -7.203634063 | 6.53E-12 | 3.13E-11 | 16.26983579 |
| PCID2    | -0.4282025   | 4.08380807 | -7.203233447 | 6.55E-12 | 3.14E-11 | 16.26743851 |
| C7orf31  | -0.39944989  | 2.74907646 | -7.202388177 | 6.58E-12 | 3.15E-11 | 16.26238071 |
| VPS51    | -0.502101318 | 5.89735399 | -7.201324138 | 6.62E-12 | 3.17E-11 | 16.25601444 |
| MFAP3L   | -0.692325011 | 1.2047305  | -7.200357125 | 6.66E-12 | 3.19E-11 | 16.25022922 |
| PRTFDC   | -0.705764022 | 2.58380666 | -7.200001528 | 6.68E-12 | 3.20E-11 | 16.24810197 |
| HPD      | -0.27707568  | 0.62755066 | -7.199789311 | 6.69E-12 | 3.20E-11 | 16.24683248 |
| MCEMP1   | 1.058673214  | 1.14903311 | 7.19927876   | 6.71E-12 | 3.21E-11 | 16.24377844 |
| CLIC3    | -1.014852652 | 8.28771002 | -7.199026773 | 6.72E-12 | 3.21E-11 | 16.24227115 |
| GRSF1    | -0.413219886 | 5.26960149 | -7.197389804 | 6.78E-12 | 3.24E-11 | 16.23248024 |
| HNRNPL   | -0.377682163 | 6.37226326 | -7.196839311 | 6.81E-12 | 3.25E-11 | 16.22918802 |
| TFCP2    | -0.549070984 | 4.82099023 | -7.194364401 | 6.91E-12 | 3.30E-11 | 16.21438884 |
| C21orf59 | -0.239563011 | 0.51059576 | -7.192187575 | 7.00E-12 | 3.34E-11 | 16.2013749  |
| ADPRH    | -0.437826252 | 3.37739935 | -7.190423657 | 7.08E-12 | 3.38E-11 | 16.1908314  |
| CAPS2    | -0.446198461 | 1.67961784 | -7.190097331 | 7.09E-12 | 3.39E-11 | 16.18888104 |
| SNRPF    | -0.420358253 | 4.87753054 | -7.189092916 | 7.14E-12 | 3.41E-11 | 16.18287828 |
| KRT27    | -1.073017296 | 1.99577775 | -7.187786789 | 7.19E-12 | 3.43E-11 | 16.1750732  |
| USP44    | -0.347838281 | 0.83073592 | -7.186927263 | 7.23E-12 | 3.45E-11 | 16.16993741 |
| UTP6     | -0.351020804 | 4.00394341 | -7.186722015 | 7.24E-12 | 3.45E-11 | 16.16871109 |
| BHLHB9   | -0.483060855 | 2.45857412 | -7.183221378 | 7.40E-12 | 3.53E-11 | 16.14779889 |
| PDE1B    | -0.629136547 | 1.69248863 | -7.182534765 | 7.43E-12 | 3.54E-11 | 16.14369797 |

|         |              |            |              |          |          |             |
|---------|--------------|------------|--------------|----------|----------|-------------|
| GPN2    | -0.37002967  | 4.33075513 | -7.180569805 | 7.52E-12 | 3.58E-11 | 16.13196335 |
| ARHGEF  | -0.646214475 | 2.58038137 | -7.180361937 | 7.53E-12 | 3.58E-11 | 16.1307221  |
| OSMR    | 0.906484727  | 3.60676385 | 7.180166661  | 7.53E-12 | 3.59E-11 | 16.12955606 |
| HSD17B  | -0.519760612 | 2.94967839 | -7.179128375 | 7.58E-12 | 3.61E-11 | 16.12335656 |
| TBCD    | -0.425162209 | 4.67114306 | -7.178997049 | 7.59E-12 | 3.61E-11 | 16.12257248 |
| SEMA3C  | 0.893171073  | 1.52352797 | 7.176723786  | 7.69E-12 | 3.66E-11 | 16.10900131 |
| PSMC1   | -0.505654959 | 2.90685677 | -7.17669106  | 7.70E-12 | 3.66E-11 | 16.10880596 |
| ERG     | -0.622439658 | 2.82174298 | -7.176405953 | 7.71E-12 | 3.67E-11 | 16.1071041  |
| DET1    | -0.403250576 | 2.47174009 | -7.17587036  | 7.73E-12 | 3.68E-11 | 16.10390717 |
| MYO1H   | -0.204299656 | 0.35762887 | -7.175405363 | 7.76E-12 | 3.69E-11 | 16.10113176 |
| ZSWIM9  | -0.448264195 | 3.82864419 | -7.173125123 | 7.86E-12 | 3.74E-11 | 16.08752346 |
| OGFOD2  | -0.282229993 | 1.11572719 | -7.17254095  | 7.89E-12 | 3.75E-11 | 16.08403763 |
| PWWP3I  | -1.204629122 | 2.26656535 | -7.172331307 | 7.90E-12 | 3.75E-11 | 16.0827867  |
| POLR2E  | -0.411029141 | 6.39126023 | -7.168132847 | 8.11E-12 | 3.85E-11 | 16.05773998 |
| CFAP58  | -0.329402829 | 0.81060869 | -7.16808566  | 8.11E-12 | 3.85E-11 | 16.05745854 |
| GNPAT   | -0.331346408 | 5.47800233 | -7.166495965 | 8.19E-12 | 3.88E-11 | 16.04797749 |
| C12orf4 | -0.365190718 | 3.29879467 | -7.166142358 | 8.21E-12 | 3.89E-11 | 16.04586874 |
| TM7SF2  | -0.679066058 | 5.94537404 | -7.165825094 | 8.22E-12 | 3.90E-11 | 16.04397679 |
| TMEM18  | -0.589210675 | 5.00116286 | -7.165770904 | 8.22E-12 | 3.90E-11 | 16.04365364 |
| CDC42EI | -0.629333356 | 4.70296345 | -7.165381104 | 8.24E-12 | 3.91E-11 | 16.04132922 |
| CFAP61  | -0.165000874 | 0.2348601  | -7.165014238 | 8.26E-12 | 3.91E-11 | 16.03914163 |
| GPR153  | 0.823119454  | 2.1613626  | 7.164113363  | 8.31E-12 | 3.93E-11 | 16.0337701  |
| RAN     | -0.426565569 | 6.61088306 | -7.163565301 | 8.34E-12 | 3.95E-11 | 16.03050247 |
| MAEA    | -0.381175139 | 4.48067368 | -7.16037396  | 8.50E-12 | 4.02E-11 | 16.01147849 |
| MGME1   | -0.433905409 | 4.76207712 | -7.160039605 | 8.52E-12 | 4.03E-11 | 16.00948569 |
| ULK4    | -0.417323758 | 2.12063621 | -7.158812302 | 8.58E-12 | 4.06E-11 | 16.00217131 |
| GTF2E1  | -0.425915925 | 3.01132256 | -7.156972006 | 8.68E-12 | 4.10E-11 | 15.99120523 |
| GAP43   | 1.607619817  | 2.06734902 | 7.15626079   | 8.71E-12 | 4.12E-11 | 15.98696769 |
| B4GALT  | -0.418356795 | 5.28733902 | -7.155587331 | 8.75E-12 | 4.14E-11 | 15.98295537 |
| SLC31A1 | -0.592329543 | 4.16785335 | -7.155094774 | 8.78E-12 | 4.15E-11 | 15.98002098 |
| TCHP    | -0.37896207  | 2.8297733  | -7.152472226 | 8.92E-12 | 4.21E-11 | 15.96439953 |
| LGALSL  | -0.518705684 | 2.94826083 | -7.152211453 | 8.93E-12 | 4.22E-11 | 15.96284642 |
| TIMM8A  | -0.344143163 | 2.79730385 | -7.150145836 | 9.04E-12 | 4.27E-11 | 15.95054537 |
| SCUBE3  | -1.275082375 | 4.33072112 | -7.149420867 | 9.08E-12 | 4.29E-11 | 15.94622863 |
| EPPK1   | 0.762594428  | 1.49309802 | 7.149158824  | 9.10E-12 | 4.29E-11 | 15.9446684  |
| DPH2    | -0.390153831 | 3.96988792 | -7.147244067 | 9.20E-12 | 4.34E-11 | 15.9332689  |
| PSMG3   | -0.441838679 | 5.08926357 | -7.146754558 | 9.23E-12 | 4.35E-11 | 15.93035494 |
| FAM189  | -0.9472736   | 5.84594784 | -7.14649451  | 9.25E-12 | 4.36E-11 | 15.92880696 |
| RHOD    | -0.490742963 | 6.2689129  | -7.142905163 | 9.45E-12 | 4.45E-11 | 15.90744477 |
| PSMC6   | -0.381492211 | 4.57045081 | -7.139531934 | 9.65E-12 | 4.55E-11 | 15.88737533 |

|         |              |            |              |          |          |             |
|---------|--------------|------------|--------------|----------|----------|-------------|
| TNFSF9  | 1.06194603   | 1.47006994 | 7.139482413  | 9.65E-12 | 4.55E-11 | 15.88708074 |
| ZSCAN1i | -0.471721776 | 5.04798249 | -7.138890273 | 9.68E-12 | 4.56E-11 | 15.8835584  |
| ACBD5   | -0.603102193 | 5.03217978 | -7.138400762 | 9.71E-12 | 4.57E-11 | 15.88064669 |
| SULT1C4 | -0.639728383 | 1.38512318 | -7.137250843 | 9.78E-12 | 4.60E-11 | 15.87380728 |
| MMP11   | 1.049546099  | 2.3025196  | 7.137065116  | 9.79E-12 | 4.61E-11 | 15.87270269 |
| CLUAP1  | -0.394594228 | 3.80820735 | -7.136972816 | 9.80E-12 | 4.61E-11 | 15.87215375 |
| L3MBTL2 | -0.404780587 | 4.11992643 | -7.134712225 | 9.93E-12 | 4.67E-11 | 15.85871084 |
| TUBD1   | -0.48193989  | 3.24165989 | -7.134696009 | 9.93E-12 | 4.67E-11 | 15.85861442 |
| C2orf88 | -0.590169136 | 1.68730023 | -7.134051893 | 9.97E-12 | 4.69E-11 | 15.85478462 |
| GTF2H1  | -0.434275421 | 3.90428751 | -7.131991966 | 1.01E-11 | 4.75E-11 | 15.84253821 |
| WDR45   | -0.37960685  | 5.35749486 | -7.131738656 | 1.01E-11 | 4.75E-11 | 15.84103243 |
| ACBD6   | -0.304748364 | 3.77593138 | -7.129279172 | 1.03E-11 | 4.82E-11 | 15.82641406 |
| ARHGEF  | -0.504831158 | 3.51942231 | -7.128501718 | 1.03E-11 | 4.84E-11 | 15.82179383 |
| POFUT2  | -0.505167832 | 4.37266962 | -7.128133118 | 1.03E-11 | 4.85E-11 | 15.81960344 |
| TOE1    | -0.462284362 | 4.41247074 | -7.127945214 | 1.03E-11 | 4.86E-11 | 15.81848686 |
| CREB3   | -0.402692377 | 6.65574275 | -7.126579749 | 1.04E-11 | 4.90E-11 | 15.81037345 |
| PSTK    | -0.267816665 | 1.60879254 | -7.125125433 | 1.05E-11 | 4.94E-11 | 15.80173324 |
| DISP2   | -0.556251911 | 1.37634063 | -7.122433198 | 1.07E-11 | 5.02E-11 | 15.78574155 |
| OGFOD3  | -0.429451143 | 4.79643567 | -7.121296342 | 1.08E-11 | 5.05E-11 | 15.77898993 |
| PDE5A   | 1.341784083  | 5.44177433 | 7.120105031  | 1.09E-11 | 5.09E-11 | 15.77191567 |
| TOM1L2  | -0.561959523 | 5.78895968 | -7.119259691 | 1.09E-11 | 5.11E-11 | 15.76689634 |
| AGPAT4  | -0.541742019 | 1.31358084 | -7.118628461 | 1.09E-11 | 5.13E-11 | 15.76314858 |
| MAGI1   | -0.579996288 | 3.85356097 | -7.118279681 | 1.10E-11 | 5.14E-11 | 15.76107788 |
| MAN1C1  | -0.717880269 | 4.45500847 | -7.11628493  | 1.11E-11 | 5.20E-11 | 15.74923643 |
| NIF3L1  | -0.408502651 | 4.77409367 | -7.116134084 | 1.11E-11 | 5.20E-11 | 15.74834105 |
| DUOX2   | -1.439892739 | 6.86014999 | -7.115269936 | 1.12E-11 | 5.23E-11 | 15.74321196 |
| LMF2    | -0.442452714 | 6.39391388 | -7.112826762 | 1.13E-11 | 5.30E-11 | 15.72871293 |
| ENO3    | -1.108495636 | 2.81279171 | -7.110373651 | 1.15E-11 | 5.38E-11 | 15.71415828 |
| LRRC7   | -0.432086016 | 0.63260432 | -7.109665399 | 1.16E-11 | 5.40E-11 | 15.70995675 |
| MAPK3   | -0.376946707 | 5.94707444 | -7.108847642 | 1.16E-11 | 5.43E-11 | 15.70510595 |
| KTI12   | -0.403218822 | 3.82671522 | -7.108417886 | 1.16E-11 | 5.44E-11 | 15.70255686 |
| CYP1B1  | 1.698490806  | 4.12899042 | 7.10818386   | 1.17E-11 | 5.45E-11 | 15.70116878 |
| L1CAM   | 0.539304173  | 0.73216002 | 7.107455488  | 1.17E-11 | 5.47E-11 | 15.69684879 |
| SMIM15  | -0.435448918 | 5.90186945 | -7.106928425 | 1.18E-11 | 5.49E-11 | 15.69372294 |
| SNRNP4  | -0.441930468 | 4.55445868 | -7.106479772 | 1.18E-11 | 5.50E-11 | 15.69106225 |
| BHLHE40 | 0.993246654  | 7.53870827 | 7.106335843  | 1.18E-11 | 5.50E-11 | 15.69020871 |
| ARFGAP  | -0.378675066 | 5.7278435  | -7.105301196 | 1.19E-11 | 5.54E-11 | 15.68407335 |
| PIWIL2  | -0.401943719 | 0.55633032 | -7.104935276 | 1.19E-11 | 5.55E-11 | 15.68190362 |
| MTHFSD  | -0.355173217 | 3.0594982  | -7.103225888 | 1.20E-11 | 5.60E-11 | 15.67176875 |
| TADA2B  | -0.382340746 | 4.63206049 | -7.103180617 | 1.20E-11 | 5.60E-11 | 15.67150037 |

|         |              |            |              |          |          |             |
|---------|--------------|------------|--------------|----------|----------|-------------|
| MRPL10  | -0.367233121 | 5.73609455 | -7.102747147 | 1.21E-11 | 5.62E-11 | 15.66893062 |
| ZNF35   | -0.333145419 | 2.65818978 | -7.099596232 | 1.23E-11 | 5.72E-11 | 15.65025415 |
| CNTNAP  | -0.212795719 | 0.2511979  | -7.09950734  | 1.23E-11 | 5.72E-11 | 15.64972733 |
| TTF1    | -0.442334684 | 4.08213157 | -7.098188981 | 1.24E-11 | 5.77E-11 | 15.64191471 |
| RDH13   | -0.384438939 | 2.50768205 | -7.095114494 | 1.26E-11 | 5.87E-11 | 15.62369903 |
| SDK1    | 1.207921382  | 2.16501271 | 7.094100604  | 1.27E-11 | 5.91E-11 | 15.6176931  |
| CCDC86  | -0.447864926 | 4.69003577 | -7.094060266 | 1.27E-11 | 5.91E-11 | 15.61745416 |
| PRIMA1  | -0.735302444 | 0.80804785 | -7.093571004 | 1.27E-11 | 5.93E-11 | 15.61455616 |
| TMEM24  | -0.510509965 | 2.08484385 | -7.093339625 | 1.28E-11 | 5.93E-11 | 15.61318571 |
| IL1RAP  | 1.048175277  | 2.6753292  | 7.091528991  | 1.29E-11 | 6.00E-11 | 15.60246235 |
| FBXO3   | -0.447223292 | 3.61444956 | -7.089284599 | 1.31E-11 | 6.08E-11 | 15.58917264 |
| ODR4    | -0.456575276 | 4.83241604 | -7.088682193 | 1.31E-11 | 6.10E-11 | 15.5856061  |
| CHMP6   | -0.446707253 | 5.45791614 | -7.088168059 | 1.32E-11 | 6.11E-11 | 15.58256233 |
| GPI     | -0.386545203 | 6.24998306 | -7.087562593 | 1.32E-11 | 6.13E-11 | 15.57897805 |
| DNTT    | -0.43729892  | 0.32045811 | -7.087348623 | 1.32E-11 | 6.14E-11 | 15.57771142 |
| SLC25A2 | -0.853979625 | 6.97949887 | -7.085681944 | 1.34E-11 | 6.20E-11 | 15.56784615 |
| MMP7    | 1.783317881  | 2.520041   | 7.085216477  | 1.34E-11 | 6.22E-11 | 15.56509127 |
| ZNF671  | -0.493303092 | 3.73708156 | -7.085158515 | 1.34E-11 | 6.22E-11 | 15.56474823 |
| WDR63   | -0.455242489 | 1.0854877  | -7.0849291   | 1.34E-11 | 6.22E-11 | 15.56339049 |
| CTIF    | -0.476151305 | 3.84354792 | -7.084579019 | 1.35E-11 | 6.24E-11 | 15.56131866 |
| TKT     | -0.516833235 | 7.02261784 | -7.083622458 | 1.35E-11 | 6.27E-11 | 15.55565797 |
| FOXA2   | -1.160266323 | 1.69354726 | -7.083336226 | 1.36E-11 | 6.28E-11 | 15.55396421 |
| SLC43A1 | -0.860831447 | 3.07449971 | -7.083069902 | 1.36E-11 | 6.29E-11 | 15.5523883  |
| TAMM41  | -0.311313341 | 2.23447911 | -7.081014851 | 1.37E-11 | 6.36E-11 | 15.54022936 |
| MRRF    | -0.346254436 | 2.98771094 | -7.080958224 | 1.37E-11 | 6.36E-11 | 15.53989436 |
| ZDHHC1  | -0.539918977 | 4.5465243  | -7.080933959 | 1.38E-11 | 6.36E-11 | 15.5397508  |
| OCA2    | -1.070870875 | 1.34934324 | -7.078984337 | 1.39E-11 | 6.44E-11 | 15.52821793 |
| CHMP7   | -0.354707271 | 4.90825253 | -7.077847759 | 1.40E-11 | 6.48E-11 | 15.52149555 |
| IRAK1   | -0.577844895 | 4.87154643 | -7.077129488 | 1.41E-11 | 6.51E-11 | 15.51724766 |
| METTL2  | -0.392312534 | 3.41839243 | -7.076383007 | 1.41E-11 | 6.53E-11 | 15.51283323 |
| MORF4L  | -0.44872652  | 7.75070797 | -7.076278905 | 1.41E-11 | 6.54E-11 | 15.51221763 |
| MOB4    | -0.447507165 | 4.2312008  | -7.075610409 | 1.42E-11 | 6.56E-11 | 15.50826469 |
| TNN     | -0.79673816  | 1.03127208 | -7.075215301 | 1.42E-11 | 6.57E-11 | 15.50592846 |
| ISY1    | -0.407243903 | 4.1261892  | -7.074252796 | 1.43E-11 | 6.61E-11 | 15.50023764 |
| TRMU    | -0.435490568 | 2.96101258 | -7.07334222  | 1.44E-11 | 6.65E-11 | 15.49485432 |
| USP5    | -0.456322277 | 6.29882618 | -7.073272834 | 1.44E-11 | 6.65E-11 | 15.49444413 |
| ADGRF4  | 0.659968858  | 0.58143165 | 7.07258831   | 1.45E-11 | 6.67E-11 | 15.49039757 |
| GABRD   | -1.000827982 | 3.31236874 | -7.070547027 | 1.46E-11 | 6.75E-11 | 15.47833209 |
| CST5    | 1.138984973  | 1.37293173 | 7.069922783  | 1.47E-11 | 6.78E-11 | 15.47464282 |
| EFCAB6  | -0.413503649 | 1.53840644 | -7.068994179 | 1.48E-11 | 6.81E-11 | 15.46915519 |



|         |              |            |              |          |          |             |
|---------|--------------|------------|--------------|----------|----------|-------------|
| KCNIP4  | -0.623571301 | 1.41962055 | -7.067213898 | 1.49E-11 | 6.88E-11 | 15.45863588 |
| RNF225  | 0.653885251  | 0.88038544 | 7.064469431  | 1.52E-11 | 7.00E-11 | 15.44242289 |
| PELI1   | 1.039674372  | 4.24627583 | 7.06400427   | 1.52E-11 | 7.01E-11 | 15.43967537 |
| PPP1R1  | -0.519860615 | 4.2271631  | -7.0636289   | 1.53E-11 | 7.03E-11 | 15.43745829 |
| MICU2   | -0.453679664 | 5.51718101 | -7.059934935 | 1.56E-11 | 7.19E-11 | 15.41564456 |
| ISG20L2 | -0.434403181 | 4.09192235 | -7.059786891 | 1.56E-11 | 7.19E-11 | 15.41477049 |
| FAM20A  | 1.482559724  | 4.62367996 | 7.058685251  | 1.57E-11 | 7.24E-11 | 15.40826662 |
| TMEM16  | -0.500509543 | 3.79084356 | -7.053654236 | 1.62E-11 | 7.46E-11 | 15.37857318 |
| SUGT1   | -0.353448636 | 3.48249723 | -7.051423074 | 1.64E-11 | 7.55E-11 | 15.36540926 |
| ZSCAN2  | -0.38250803  | 3.03819493 | -7.049704241 | 1.66E-11 | 7.63E-11 | 15.35527    |
| TCF25   | -0.429430006 | 6.0100992  | -7.048581751 | 1.67E-11 | 7.68E-11 | 15.34864942 |
| EPHB3   | 1.213676273  | 3.25915176 | 7.0468396    | 1.69E-11 | 7.76E-11 | 15.33837541 |
| CHAC2   | -0.415410366 | 1.79865996 | -7.045998166 | 1.70E-11 | 7.80E-11 | 15.33341383 |
| GALNT1  | -0.485761756 | 4.78715573 | -7.045820381 | 1.70E-11 | 7.80E-11 | 15.33236556 |
| MRC1    | 1.0568612    | 2.86776717 | 7.045263779  | 1.70E-11 | 7.83E-11 | 15.32908378 |
| SLC9A1  | -0.488781586 | 5.00020284 | -7.0443635   | 1.71E-11 | 7.87E-11 | 15.32377603 |
| PHLPP1  | -0.515610555 | 3.15973998 | -7.043897636 | 1.72E-11 | 7.89E-11 | 15.32102962 |
| GRASP   | -0.702566582 | 3.52518398 | -7.043629957 | 1.72E-11 | 7.90E-11 | 15.31945163 |
| CPEB3   | -0.545268963 | 2.68922346 | -7.043590015 | 1.72E-11 | 7.90E-11 | 15.31921617 |
| LSM14B  | -0.430116451 | 5.25830561 | -7.042576677 | 1.73E-11 | 7.94E-11 | 15.31324285 |
| C4orf19 | -0.516362068 | 0.97467367 | -7.042046015 | 1.74E-11 | 7.97E-11 | 15.31011498 |
| TSTD1   | -0.534476533 | 8.0532765  | -7.040579748 | 1.75E-11 | 8.04E-11 | 15.30147324 |
| DMAP1   | -0.438660962 | 4.68804498 | -7.039979814 | 1.76E-11 | 8.06E-11 | 15.29793776 |
| WIPI2   | -0.339143056 | 4.89997177 | -7.039791416 | 1.76E-11 | 8.07E-11 | 15.29682755 |
| GIPC3   | -0.70058393  | 2.67807475 | -7.039332732 | 1.77E-11 | 8.09E-11 | 15.29412465 |
| GPATCH  | -0.552785746 | 3.93377233 | -7.03899763  | 1.77E-11 | 8.10E-11 | 15.29215006 |
| XPNPEP  | -0.397472164 | 2.44292646 | -7.036174246 | 1.80E-11 | 8.24E-11 | 15.27551582 |
| PI4KB   | -0.438685566 | 5.79892216 | -7.035519073 | 1.81E-11 | 8.27E-11 | 15.27165645 |
| GOLGA7  | 0.887585457  | 2.06229502 | 7.034231134  | 1.82E-11 | 8.33E-11 | 15.26407039 |
| ASB3    | -0.341355205 | 1.5933411  | -7.033078331 | 1.83E-11 | 8.39E-11 | 15.2572811  |
| PARM1   | -0.75972741  | 7.31536651 | -7.032265092 | 1.84E-11 | 8.43E-11 | 15.25249208 |
| TLE5    | -0.394252174 | 8.50425138 | -7.030709412 | 1.86E-11 | 8.50E-11 | 15.24333199 |
| TRIM46  | 0.54000768   | 0.74669716 | 7.030478575  | 1.86E-11 | 8.51E-11 | 15.24197291 |
| IL1RL1  | 1.846498497  | 2.36545732 | 7.027806641  | 1.89E-11 | 8.65E-11 | 15.22624368 |
| ZNF559  | -0.490462225 | 3.29974668 | -7.027166575 | 1.90E-11 | 8.68E-11 | 15.22247633 |
| ADCY9   | -0.632653246 | 4.76892543 | -7.026782077 | 1.91E-11 | 8.70E-11 | 15.22021333 |
| ZNF469  | 0.399704539  | 0.61386824 | 7.026617857  | 1.91E-11 | 8.70E-11 | 15.21924681 |
| LEMD2   | -0.373995354 | 4.62955052 | -7.026579699 | 1.91E-11 | 8.70E-11 | 15.21902224 |
| DNAAF2  | -0.440125816 | 3.86079337 | -7.025763052 | 1.92E-11 | 8.74E-11 | 15.21421615 |
| TMEM10  | -0.449669318 | 4.17617354 | -7.024508422 | 1.93E-11 | 8.81E-11 | 15.2068332  |

|          |              |            |              |          |          |             |
|----------|--------------|------------|--------------|----------|----------|-------------|
| OR2T33   | -0.192387331 | 0.19291777 | -7.024102695 | 1.94E-11 | 8.83E-11 | 15.20444587 |
| ALG2     | -0.469985028 | 5.5586953  | -7.02365902  | 1.94E-11 | 8.85E-11 | 15.20183535 |
| APBA2    | -0.766455471 | 1.65136448 | -7.023488591 | 1.94E-11 | 8.85E-11 | 15.2008326  |
| QTRT1    | -0.51946173  | 5.14225749 | -7.023369219 | 1.94E-11 | 8.86E-11 | 15.20013026 |
| GLI4     | -0.510140439 | 3.30438941 | -7.022258333 | 1.96E-11 | 8.92E-11 | 15.19359464 |
| CD70     | 1.077768821  | 1.34357398 | 7.02190126   | 1.96E-11 | 8.93E-11 | 15.19149404 |
| ACADVL   | -0.487097003 | 7.87318658 | -7.02133125  | 1.97E-11 | 8.96E-11 | 15.18814092 |
| FGF2     | 0.678630134  | 2.35658131 | 7.021030851  | 1.97E-11 | 8.97E-11 | 15.18637387 |
| GNG10    | -0.562421627 | 3.9851303  | -7.019520763 | 1.99E-11 | 9.05E-11 | 15.17749181 |
| TMED5    | -0.580813081 | 4.61546204 | -7.018716117 | 2.00E-11 | 9.09E-11 | 15.17275957 |
| VAMP2    | -0.456412884 | 6.71109264 | -7.018615031 | 2.00E-11 | 9.10E-11 | 15.17216509 |
| CLDN5    | -0.918177852 | 4.22834965 | -7.018463677 | 2.00E-11 | 9.10E-11 | 15.171275   |
| C16orf96 | -0.281966092 | 0.54537431 | -7.018341773 | 2.00E-11 | 9.10E-11 | 15.17055812 |
| RNF215   | -0.410541303 | 2.74887992 | -7.018306683 | 2.00E-11 | 9.10E-11 | 15.17035176 |
| ACAT2    | -0.38785332  | 3.0641151  | -7.018306146 | 2.00E-11 | 9.10E-11 | 15.1703486  |
| THAP7    | -0.417345158 | 5.16015978 | -7.018025687 | 2.01E-11 | 9.12E-11 | 15.16869933 |
| ZFP62    | -0.472906482 | 4.30671528 | -7.017125661 | 2.02E-11 | 9.16E-11 | 15.16340693 |
| MARCKS   | -0.675427418 | 9.07064201 | -7.016897604 | 2.02E-11 | 9.17E-11 | 15.16206596 |
| SEPTIN4  | -0.486652838 | 1.68949561 | -7.01664998  | 2.02E-11 | 9.19E-11 | 15.16060997 |
| C4orf3   | -0.499430677 | 7.17052761 | -7.016276447 | 2.03E-11 | 9.20E-11 | 15.15841372 |
| PHYH     | -0.608377838 | 5.6555333  | -7.015820728 | 2.03E-11 | 9.23E-11 | 15.15573436 |
| CFAP52   | -0.228718436 | 0.38770817 | -7.014048838 | 2.06E-11 | 9.32E-11 | 15.1453178  |
| RAB29    | -0.653844047 | 5.16429598 | -7.014019942 | 2.06E-11 | 9.32E-11 | 15.14514794 |
| E2F4     | -0.357575173 | 5.43736318 | -7.013669989 | 2.06E-11 | 9.34E-11 | 15.14309086 |
| FRMPD3   | -0.86111575  | 1.9367535  | -7.013535244 | 2.06E-11 | 9.34E-11 | 15.14229882 |
| SLC6A14  | 0.929217349  | 1.00950413 | 7.012769765  | 2.07E-11 | 9.38E-11 | 15.13779951 |
| NCAM1    | -1.289640289 | 3.09440613 | -7.012603793 | 2.07E-11 | 9.39E-11 | 15.136824   |
| IK       | -0.384044824 | 6.615169   | -7.012432181 | 2.08E-11 | 9.40E-11 | 15.13581537 |
| CNTN3    | -0.636305601 | 1.05223515 | -7.011370946 | 2.09E-11 | 9.46E-11 | 15.12957842 |
| GABRG1   | -0.294654385 | 0.28176064 | -7.011068657 | 2.09E-11 | 9.47E-11 | 15.12780196 |
| TRAPPC   | -0.671845706 | 0.62562064 | -7.01086471  | 2.10E-11 | 9.48E-11 | 15.12660346 |
| SLA      | -0.873177038 | 3.39891509 | -7.010782199 | 2.10E-11 | 9.48E-11 | 15.12611858 |
| ARMC2    | -0.330255031 | 1.54667408 | -7.006645817 | 2.15E-11 | 9.72E-11 | 15.10181627 |
| FBXO42   | -0.37621848  | 3.62779376 | -7.006587    | 2.15E-11 | 9.72E-11 | 15.10147077 |
| MAMLD1   | 1.025073492  | 2.8531734  | 7.00568886   | 2.16E-11 | 9.77E-11 | 15.09619528 |
| JAM3     | -0.599823573 | 3.46997837 | -7.004214175 | 2.18E-11 | 9.85E-11 | 15.08753426 |
| DDX25    | -0.368345821 | 0.55502564 | -7.004168109 | 2.18E-11 | 9.85E-11 | 15.08726374 |
| UMAD1    | -0.514390356 | 4.58209044 | -7.004160872 | 2.18E-11 | 9.85E-11 | 15.08722124 |
| CDC23    | -0.438668939 | 4.31966896 | -7.002643066 | 2.20E-11 | 9.94E-11 | 15.0783083  |
| TUBGCP   | -0.364096158 | 5.05530911 | -7.001758839 | 2.21E-11 | 9.99E-11 | 15.07311651 |

|         |              |            |              |          |          |             |
|---------|--------------|------------|--------------|----------|----------|-------------|
| RNF26   | -0.455652438 | 5.3089941  | -7.001164172 | 2.22E-11 | 1.00E-10 | 15.06962513 |
| TIAM2   | -0.568661131 | 1.92733375 | -7.001110992 | 2.22E-11 | 1.00E-10 | 15.06931292 |
| SCRN3   | -0.549380676 | 3.655964   | -7.000890469 | 2.23E-11 | 1.00E-10 | 15.06801825 |
| PTRH1   | -0.123450521 | 0.24810669 | -6.999547067 | 2.24E-11 | 1.01E-10 | 15.06013189 |
| KBTBD1  | -0.554854902 | 1.78988983 | -6.999263323 | 2.25E-11 | 1.01E-10 | 15.05846632 |
| YARS2   | -0.332418635 | 4.07496938 | -6.998413972 | 2.26E-11 | 1.02E-10 | 15.05348093 |
| SRARP   | -0.430315285 | 0.30542189 | -6.997769195 | 2.27E-11 | 1.02E-10 | 15.04969658 |
| TRAPPC  | -0.40640406  | 7.76810347 | -6.997697539 | 2.27E-11 | 1.02E-10 | 15.04927603 |
| PAPPA   | 0.623583178  | 1.04353574 | 6.997308487  | 2.27E-11 | 1.02E-10 | 15.04699272 |
| PROS1   | 1.441337331  | 6.67154085 | 6.995680481  | 2.30E-11 | 1.03E-10 | 15.03743906 |
| VDAC1   | -0.383627447 | 6.94821536 | -6.994790282 | 2.31E-11 | 1.04E-10 | 15.03221572 |
| WDR53   | -0.306590449 | 3.61989767 | -6.994621149 | 2.31E-11 | 1.04E-10 | 15.03122337 |
| PAXX    | -0.622032991 | 6.20181125 | -6.994298139 | 2.31E-11 | 1.04E-10 | 15.02932822 |
| GALNT5  | 0.733970019  | 0.97248541 | 6.993870475  | 2.32E-11 | 1.04E-10 | 15.02681913 |
| RPS6KB  | -0.402811758 | 4.23155406 | -6.990812378 | 2.36E-11 | 1.06E-10 | 15.00888045 |
| CIITA   | 0.842430588  | 2.20459425 | 6.989646736  | 2.38E-11 | 1.07E-10 | 15.00204425 |
| TMC8    | 1.026324162  | 3.43700121 | 6.988767028  | 2.39E-11 | 1.07E-10 | 14.99688548 |
| CDK5RA  | -0.301494182 | 4.27088938 | -6.988112735 | 2.40E-11 | 1.08E-10 | 14.99304888 |
| SDC2    | -0.847646003 | 7.85340801 | -6.98702588  | 2.42E-11 | 1.09E-10 | 14.98667638 |
| CCL17   | 1.517983706  | 2.52720647 | 6.986801152  | 2.42E-11 | 1.09E-10 | 14.98535883 |
| ELOA    | -0.434874656 | 4.97571664 | -6.986654717 | 2.42E-11 | 1.09E-10 | 14.98450031 |
| SUMO2   | -0.37282166  | 7.07192582 | -6.986632526 | 2.42E-11 | 1.09E-10 | 14.98437021 |
| TM6SF1  | -0.765860084 | 2.76762005 | -6.986561851 | 2.42E-11 | 1.09E-10 | 14.98395587 |
| ITGA3   | 0.883113715  | 7.56856187 | 6.985560594  | 2.44E-11 | 1.09E-10 | 14.97808611 |
| NPHP1   | -0.384569072 | 2.04373969 | -6.985296627 | 2.44E-11 | 1.09E-10 | 14.97653873 |
| CLPP    | -0.384067488 | 5.77363287 | -6.981376242 | 2.50E-11 | 1.12E-10 | 14.953562   |
| GNPDA2  | -0.416863955 | 3.1947563  | -6.981269796 | 2.50E-11 | 1.12E-10 | 14.95293826 |
| KPNA5   | -0.476129583 | 3.46978629 | -6.980197228 | 2.52E-11 | 1.13E-10 | 14.9466537  |
| NT5C3A  | -0.403912689 | 4.71540133 | -6.978710123 | 2.54E-11 | 1.14E-10 | 14.93794131 |
| CCL14   | -0.542080733 | 1.06633931 | -6.978588878 | 2.54E-11 | 1.14E-10 | 14.93723104 |
| CECR2   | -0.400472682 | 0.4588423  | -6.978086323 | 2.55E-11 | 1.14E-10 | 14.93428708 |
| TNFAIP2 | 0.834260519  | 4.78391522 | 6.977710041  | 2.56E-11 | 1.14E-10 | 14.93208292 |
| ENKD1   | -0.583329807 | 4.60177998 | -6.976458277 | 2.58E-11 | 1.15E-10 | 14.924751   |
| CA12    | -1.640180534 | 4.05756844 | -6.97615148  | 2.58E-11 | 1.15E-10 | 14.92295414 |
| MED18   | -0.356259104 | 4.42821401 | -6.975779894 | 2.59E-11 | 1.16E-10 | 14.9207779  |
| WDFY4   | 0.645386056  | 1.32790305 | 6.975603829  | 2.59E-11 | 1.16E-10 | 14.91974677 |
| TBX2    | -0.958333501 | 3.23357279 | -6.97434217  | 2.61E-11 | 1.17E-10 | 14.91235841 |
| ICAM5   | 1.278615992  | 3.11608497 | 6.974027832  | 2.61E-11 | 1.17E-10 | 14.91051777 |
| ZNF3    | -0.36337745  | 4.14127682 | -6.973397635 | 2.62E-11 | 1.17E-10 | 14.90682774 |
| ATXN7L  | -0.516559193 | 5.70585004 | -6.972831367 | 2.63E-11 | 1.18E-10 | 14.90351224 |

|         |              |            |              |          |          |             |
|---------|--------------|------------|--------------|----------|----------|-------------|
| C6orf47 | -0.348799808 | 5.46935719 | -6.971505406 | 2.65E-11 | 1.18E-10 | 14.89574944 |
| DCDC1   | -0.1787354   | 0.30068188 | -6.970904184 | 2.66E-11 | 1.19E-10 | 14.89222994 |
| NOD2    | 0.482676881  | 0.81009643 | 6.97041393   | 2.67E-11 | 1.19E-10 | 14.88936018 |
| KAT5    | -0.542444129 | 5.13538257 | -6.96872954  | 2.70E-11 | 1.20E-10 | 14.87950147 |
| HSD11B  | -0.432160481 | 3.54632837 | -6.968221722 | 2.71E-11 | 1.21E-10 | 14.87652953 |
| DST     | 0.827108423  | 2.61169635 | 6.966710554  | 2.73E-11 | 1.22E-10 | 14.8676865  |
| EIF3I   | -0.308180885 | 8.57203889 | -6.96647162  | 2.73E-11 | 1.22E-10 | 14.86628843 |
| TRMT9B  | -0.767249123 | 3.30404798 | -6.966231443 | 2.74E-11 | 1.22E-10 | 14.86488312 |
| DXO     | -0.400102807 | 4.56994422 | -6.965882269 | 2.74E-11 | 1.22E-10 | 14.86284011 |
| ZBTB2   | -0.60094206  | 5.31041061 | -6.965272504 | 2.75E-11 | 1.23E-10 | 14.85927255 |
| RPL22   | -0.412645489 | 7.63282527 | -6.964201206 | 2.77E-11 | 1.23E-10 | 14.85300521 |
| FAM166E | -0.353907086 | 0.85854061 | -6.963995092 | 2.77E-11 | 1.23E-10 | 14.85179948 |
| TNFAIP8 | -0.575112309 | 2.74480765 | -6.962847683 | 2.79E-11 | 1.24E-10 | 14.84508774 |
| AKR1C3  | -0.944953123 | 2.12843995 | -6.962783266 | 2.79E-11 | 1.24E-10 | 14.84471096 |
| NUMB    | -0.445448664 | 4.28934679 | -6.961596704 | 2.81E-11 | 1.25E-10 | 14.83777103 |
| RBM42   | -0.432069234 | 6.76831959 | -6.960708088 | 2.83E-11 | 1.26E-10 | 14.83257424 |
| DCAF17  | -0.560052999 | 3.09083458 | -6.959711079 | 2.85E-11 | 1.27E-10 | 14.82674409 |
| ALDH6A  | -0.648227923 | 4.21750231 | -6.958241556 | 2.87E-11 | 1.28E-10 | 14.81815189 |
| STX10   | -0.411805094 | 5.57981747 | -6.957832803 | 2.88E-11 | 1.28E-10 | 14.81576215 |
| PINK1   | -0.646758514 | 4.75924244 | -6.95745863  | 2.88E-11 | 1.28E-10 | 14.81357467 |
| ZDHHC1  | -0.482062101 | 1.09205482 | -6.956165315 | 2.91E-11 | 1.29E-10 | 14.80601435 |
| PAPSS2  | -0.938944946 | 2.84883936 | -6.95550733  | 2.92E-11 | 1.30E-10 | 14.80216833 |
| RMDN3   | -0.41562982  | 5.09313825 | -6.952327883 | 2.97E-11 | 1.32E-10 | 14.78358751 |
| C5orf49 | -0.544844698 | 0.97138924 | -6.951831057 | 2.98E-11 | 1.32E-10 | 14.78068457 |
| RABL6   | -0.34598928  | 4.99955046 | -6.951139761 | 3.00E-11 | 1.33E-10 | 14.77664557 |
| ADCK2   | -0.445628805 | 5.22838847 | -6.950654506 | 3.00E-11 | 1.33E-10 | 14.77381056 |
| RXRA    | -0.438861627 | 5.00071616 | -6.950127528 | 3.01E-11 | 1.34E-10 | 14.77073194 |
| NIP7    | -0.377921368 | 4.22053162 | -6.949321566 | 3.03E-11 | 1.34E-10 | 14.7660238  |
| SDR42E  | -0.407645527 | 1.80475263 | -6.949172967 | 3.03E-11 | 1.34E-10 | 14.76515578 |
| RNPEP   | -0.405808971 | 6.46133613 | -6.949006335 | 3.03E-11 | 1.34E-10 | 14.76418243 |
| PTCD3   | -0.383078537 | 3.83958094 | -6.948593473 | 3.04E-11 | 1.35E-10 | 14.76177086 |
| GOLGA8  | -0.580995769 | 0.88136685 | -6.948551481 | 3.04E-11 | 1.35E-10 | 14.76152559 |
| TMEM17  | -0.780385212 | 2.40653251 | -6.947302288 | 3.07E-11 | 1.36E-10 | 14.75422954 |
| JOSD2   | -0.549318674 | 5.37292971 | -6.946580315 | 3.08E-11 | 1.36E-10 | 14.75001318 |
| RANBP1  | -0.406317966 | 4.79015295 | -6.946414957 | 3.08E-11 | 1.36E-10 | 14.74904752 |
| TCEAL7  | -0.627226183 | 1.89828235 | -6.946234204 | 3.08E-11 | 1.36E-10 | 14.74799199 |
| SCTR    | -0.519815583 | 1.04480126 | -6.944858799 | 3.11E-11 | 1.38E-10 | 14.73996065 |
| GCFC2   | -0.448264327 | 3.6225008  | -6.94326009  | 3.14E-11 | 1.39E-10 | 14.73062676 |
| TMEM12  | -0.466322429 | 5.69540876 | -6.943073343 | 3.14E-11 | 1.39E-10 | 14.72953655 |
| TMEM16  | 1.390173125  | 2.57029824 | 6.94300109   | 3.14E-11 | 1.39E-10 | 14.72911475 |

|         |              |            |              |          |          |             |
|---------|--------------|------------|--------------|----------|----------|-------------|
| RNF185  | -0.548292256 | 5.73097657 | -6.942960759 | 3.15E-11 | 1.39E-10 | 14.72887931 |
| HMG2    | -0.524301873 | 8.0615212  | -6.942188567 | 3.16E-11 | 1.40E-10 | 14.72437161 |
| CCNO    | -0.51306407  | 4.36017997 | -6.939999056 | 3.20E-11 | 1.41E-10 | 14.7115921  |
| MINPP1  | -0.500097478 | 4.38857099 | -6.937410986 | 3.25E-11 | 1.43E-10 | 14.69648987 |
| PDZD11  | -0.311777452 | 6.46194964 | -6.936998298 | 3.26E-11 | 1.44E-10 | 14.69408206 |
| MXD4    | -0.508101511 | 5.80295854 | -6.936068967 | 3.28E-11 | 1.45E-10 | 14.68866027 |
| CATSPE  | 0.917696595  | 1.58405492 | 6.935708858  | 3.28E-11 | 1.45E-10 | 14.6865595  |
| COP1    | -0.364353049 | 4.89426729 | -6.934783754 | 3.30E-11 | 1.46E-10 | 14.68116305 |
| RALGPS  | -0.513389465 | 2.77282656 | -6.932020146 | 3.36E-11 | 1.48E-10 | 14.66504491 |
| ENTR1   | -0.380973833 | 4.59192446 | -6.931997442 | 3.36E-11 | 1.48E-10 | 14.66491251 |
| EIF1AX  | -0.46473665  | 5.65795456 | -6.931580233 | 3.37E-11 | 1.48E-10 | 14.66247962 |
| PACSIN2 | -0.526793864 | 6.04042191 | -6.930659901 | 3.38E-11 | 1.49E-10 | 14.65711318 |
| LTV1    | -0.410400651 | 4.80922291 | -6.927632227 | 3.45E-11 | 1.52E-10 | 14.63946234 |
| GALNS   | -0.383041013 | 3.26113628 | -6.926399367 | 3.47E-11 | 1.53E-10 | 14.63227647 |
| GVQW2   | -0.241755932 | 0.62705436 | -6.92496521  | 3.50E-11 | 1.54E-10 | 14.62391843 |
| FAM49A  | -0.593415272 | 5.74684995 | -6.924046352 | 3.52E-11 | 1.55E-10 | 14.61856409 |
| RAPGEF  | -0.674915786 | 2.29699206 | -6.923286815 | 3.54E-11 | 1.56E-10 | 14.6141385  |
| ZNF350  | -0.413695839 | 3.21917056 | -6.922593983 | 3.55E-11 | 1.56E-10 | 14.61010187 |
| ID1     | -1.034099888 | 8.2831497  | -6.922123871 | 3.56E-11 | 1.57E-10 | 14.60736303 |
| TSEN2   | -0.351450771 | 2.66978047 | -6.921741524 | 3.57E-11 | 1.57E-10 | 14.6051356  |
| NARS    | -0.454765815 | 6.99718494 | -6.920735397 | 3.59E-11 | 1.58E-10 | 14.59927461 |
| PICK1   | -0.391102961 | 4.40021138 | -6.919788867 | 3.61E-11 | 1.59E-10 | 14.59376133 |
| PSMD4   | -0.362626155 | 6.92075402 | -6.919315558 | 3.62E-11 | 1.59E-10 | 14.59100463 |
| PAK4    | -0.444782387 | 4.8878022  | -6.919272722 | 3.62E-11 | 1.59E-10 | 14.59075515 |
| BANK1   | -0.718018436 | 3.48324684 | -6.918440812 | 3.64E-11 | 1.60E-10 | 14.58591016 |
| KCMF1   | -0.3669383   | 4.55785209 | -6.91809982  | 3.65E-11 | 1.60E-10 | 14.58392437 |
| TRIP6   | -0.485375966 | 6.71573972 | -6.917353523 | 3.66E-11 | 1.61E-10 | 14.57957848 |
| TRAPPC  | -0.391416151 | 4.58165687 | -6.917171853 | 3.67E-11 | 1.61E-10 | 14.57852062 |
| RYR2    | -0.701428489 | 0.8323766  | -6.917107384 | 3.67E-11 | 1.61E-10 | 14.57814522 |
| NUP62C  | -0.576891032 | 2.73805423 | -6.914619626 | 3.72E-11 | 1.63E-10 | 14.563661   |
| FAP     | 0.836416961  | 1.39798025 | 6.913673474  | 3.74E-11 | 1.64E-10 | 14.55815325 |
| PRR36   | 0.940926684  | 3.58096367 | 6.913218394  | 3.75E-11 | 1.65E-10 | 14.55550431 |
| PGM5    | -0.606803698 | 1.78581752 | -6.913145001 | 3.76E-11 | 1.65E-10 | 14.55507712 |
| PARP16  | -0.352495143 | 3.55911041 | -6.911230087 | 3.80E-11 | 1.66E-10 | 14.54393216 |
| CHMP1A  | -0.368753468 | 6.68479431 | -6.910259302 | 3.82E-11 | 1.67E-10 | 14.53828292 |
| SRPRA   | -0.418337604 | 7.11247198 | -6.909220011 | 3.84E-11 | 1.68E-10 | 14.53223563 |
| TRIR    | -0.454199488 | 7.75512439 | -6.908734833 | 3.86E-11 | 1.69E-10 | 14.52941275 |
| ZNF181  | -0.424733196 | 2.7253708  | -6.907103968 | 3.89E-11 | 1.70E-10 | 14.51992499 |
| RNF11   | -0.526330105 | 7.14447008 | -6.904857019 | 3.95E-11 | 1.73E-10 | 14.50685561 |
| DRG2    | -0.368973967 | 3.72823405 | -6.904702336 | 3.95E-11 | 1.73E-10 | 14.505956   |

|          |              |            |              |          |          |             |
|----------|--------------|------------|--------------|----------|----------|-------------|
| DAZAP2   | -0.465433879 | 7.29398362 | -6.902806463 | 3.99E-11 | 1.75E-10 | 14.49493108 |
| BAIAP2L  | -0.4007578   | 4.64896382 | -6.902767703 | 3.99E-11 | 1.75E-10 | 14.4947057  |
| C11orf54 | -0.539845367 | 4.17426446 | -6.902036647 | 4.01E-11 | 1.75E-10 | 14.49045502 |
| RAB5C    | -0.47889998  | 7.02834161 | -6.901545301 | 4.02E-11 | 1.76E-10 | 14.48759829 |
| CNOT11   | -0.369200781 | 5.19658661 | -6.901001955 | 4.04E-11 | 1.76E-10 | 14.4844394  |
| CXCL5    | 0.698944227  | 0.61164717 | 6.900645479  | 4.05E-11 | 1.77E-10 | 14.48236701 |
| METTL6   | -0.312923265 | 2.55544441 | -6.900194475 | 4.06E-11 | 1.77E-10 | 14.47974519 |
| ALG6     | -0.330935165 | 2.79686745 | -6.898377058 | 4.10E-11 | 1.79E-10 | 14.46918119 |
| ASAH1    | -0.666819734 | 8.22136491 | -6.898244771 | 4.10E-11 | 1.79E-10 | 14.46841233 |
| SLC35E3  | -0.272133402 | 1.44034002 | -6.897187588 | 4.13E-11 | 1.80E-10 | 14.46226826 |
| APOLD1   | -1.097614417 | 5.07688797 | -6.896429687 | 4.15E-11 | 1.81E-10 | 14.45786394 |
| S100A10  | 1.22569728   | 7.23584182 | 6.894637692  | 4.19E-11 | 1.83E-10 | 14.4474516  |
| FER1L5   | -0.134032345 | 0.16125989 | -6.892806498 | 4.24E-11 | 1.85E-10 | 14.43681341 |
| ZNF19    | -0.333454068 | 1.92440869 | -6.892349674 | 4.25E-11 | 1.85E-10 | 14.43415982 |
| KITLG    | -0.670281923 | 2.41584745 | -6.889924026 | 4.31E-11 | 1.88E-10 | 14.42007181 |
| ARFRP1   | -0.39258851  | 4.15087604 | -6.889758529 | 4.32E-11 | 1.88E-10 | 14.41911074 |
| PTMS     | -0.541273961 | 9.39349365 | -6.889600994 | 4.32E-11 | 1.88E-10 | 14.41819593 |
| YIPF4    | -0.415845142 | 4.10539124 | -6.888863143 | 4.34E-11 | 1.89E-10 | 14.41391134 |
| CKAP4    | -0.480553407 | 5.92974689 | -6.888651204 | 4.34E-11 | 1.89E-10 | 14.41268071 |
| PODXL    | -0.753335029 | 5.79801997 | -6.886218746 | 4.41E-11 | 1.92E-10 | 14.39855836 |
| ZNF442   | -0.314236923 | 1.43133196 | -6.886096269 | 4.41E-11 | 1.92E-10 | 14.39784737 |
| ANKRD4   | -0.436651785 | 3.51690151 | -6.884101521 | 4.46E-11 | 1.94E-10 | 14.38626897 |
| TIPRL    | -0.379082581 | 5.1042689  | -6.883657032 | 4.47E-11 | 1.94E-10 | 14.38368927 |
| ZNF541   | -0.3328227   | 0.54384287 | -6.883280927 | 4.48E-11 | 1.95E-10 | 14.38150654 |
| MRPS6    | -0.509481659 | 6.06984334 | -6.883050417 | 4.49E-11 | 1.95E-10 | 14.38016882 |
| SELENO   | -0.544663396 | 6.93415367 | -6.882306176 | 4.51E-11 | 1.96E-10 | 14.37584996 |
| SGF29    | -0.433874441 | 5.00971462 | -6.881906517 | 4.52E-11 | 1.96E-10 | 14.37353085 |
| LRFN1    | -0.524428251 | 1.02130436 | -6.881422907 | 4.53E-11 | 1.97E-10 | 14.37072472 |
| ARHGEF   | -0.786541807 | 3.29398304 | -6.879380341 | 4.59E-11 | 1.99E-10 | 14.35887432 |
| CKMT1B   | -0.558777985 | 1.34489957 | -6.876417432 | 4.67E-11 | 2.03E-10 | 14.34168863 |
| SLC25A1  | -0.349677619 | 2.89347094 | -6.874465724 | 4.72E-11 | 2.05E-10 | 14.33037096 |
| PLPBP    | -0.413903266 | 5.85046368 | -6.874416759 | 4.73E-11 | 2.05E-10 | 14.33008705 |
| IGDCC4   | -0.989094876 | 3.12728449 | -6.872893244 | 4.77E-11 | 2.07E-10 | 14.32125399 |
| ATP6V1C  | -0.385753077 | 8.30115218 | -6.872599138 | 4.78E-11 | 2.07E-10 | 14.31954897 |
| MGMT     | -0.439771486 | 4.85037916 | -6.872434154 | 4.78E-11 | 2.07E-10 | 14.31859253 |
| AXIN2    | -0.778317304 | 2.99031739 | -6.871266614 | 4.82E-11 | 2.09E-10 | 14.31182457 |
| FCF1     | -0.537881461 | 4.86105088 | -6.869157623 | 4.88E-11 | 2.11E-10 | 14.29960124 |
| ELF4     | 0.637114712  | 3.28665539 | 6.867938119  | 4.91E-11 | 2.13E-10 | 14.29253438 |
| FRY      | -0.490671065 | 1.99665581 | -6.867892394 | 4.91E-11 | 2.13E-10 | 14.29226943 |
| TOM1L1   | -0.64488548  | 3.90616545 | -6.867734713 | 4.92E-11 | 2.13E-10 | 14.29135576 |

|         |              |            |              |          |          |             |
|---------|--------------|------------|--------------|----------|----------|-------------|
| CCPG1   | -0.512225151 | 3.70772928 | -6.86514961  | 4.99E-11 | 2.16E-10 | 14.27637861 |
| CEP85   | -0.540137204 | 2.83898201 | -6.863460308 | 5.04E-11 | 2.18E-10 | 14.26659351 |
| FAXC    | 0.710998396  | 2.01225344 | 6.862223997  | 5.08E-11 | 2.20E-10 | 14.25943336 |
| FAM181E | -0.614226744 | 0.93619271 | -6.861446437 | 5.10E-11 | 2.21E-10 | 14.25493054 |
| NMB     | -1.38928291  | 6.58138937 | -6.860139116 | 5.14E-11 | 2.22E-10 | 14.24736069 |
| BBIP1   | -0.418583605 | 2.97055357 | -6.859755433 | 5.15E-11 | 2.23E-10 | 14.24513921 |
| ORMDL2  | -0.381291964 | 4.75875216 | -6.859564794 | 5.16E-11 | 2.23E-10 | 14.24403547 |
| CEP57L1 | -0.270118319 | 1.89463509 | -6.858361571 | 5.20E-11 | 2.24E-10 | 14.23706966 |
| FAM49B  | -0.431074457 | 3.75068038 | -6.857909882 | 5.21E-11 | 2.25E-10 | 14.23445492 |
| GNG5    | -0.368356479 | 7.99360464 | -6.856231875 | 5.26E-11 | 2.27E-10 | 14.22474229 |
| HIST1H3 | -0.671036731 | 1.76374455 | -6.855841862 | 5.28E-11 | 2.28E-10 | 14.22248506 |
| MESP1   | -0.629679747 | 1.81101271 | -6.853946901 | 5.33E-11 | 2.30E-10 | 14.21151905 |
| VEGFD   | -0.200164599 | 0.27930299 | -6.85355577  | 5.35E-11 | 2.31E-10 | 14.20925586 |
| GSK3A   | -0.286039017 | 5.60950408 | -6.85350315  | 5.35E-11 | 2.31E-10 | 14.2089514  |
| SUMO3   | -0.395901962 | 6.60527253 | -6.85201855  | 5.40E-11 | 2.33E-10 | 14.20036197 |
| HEMGN   | -0.224679918 | 0.17421414 | -6.851650324 | 5.41E-11 | 2.33E-10 | 14.19823172 |
| SH3RF3  | -0.622405939 | 2.12603594 | -6.850266414 | 5.45E-11 | 2.35E-10 | 14.1902263  |
| CCDC9B  | -0.71398421  | 3.79503665 | -6.850241455 | 5.45E-11 | 2.35E-10 | 14.19008193 |
| MEST    | -0.474044091 | 3.90988833 | -6.850054697 | 5.46E-11 | 2.35E-10 | 14.1890017  |
| ZBTB48  | -0.441218466 | 4.20538799 | -6.847876838 | 5.53E-11 | 2.38E-10 | 14.17640609 |
| NFE2L3  | 1.318737192  | 3.90637507 | 6.847854006  | 5.53E-11 | 2.38E-10 | 14.17627406 |
| FBXL3   | -0.614961974 | 4.81935564 | -6.847603412 | 5.54E-11 | 2.38E-10 | 14.17482493 |
| ARMCX1  | -0.60886829  | 4.98850433 | -6.847540048 | 5.54E-11 | 2.38E-10 | 14.17445852 |
| PDIK1L  | -0.547381234 | 4.50345079 | -6.845834521 | 5.60E-11 | 2.41E-10 | 14.1645969  |
| KCNK17  | -1.237760271 | 1.89167291 | -6.84573144  | 5.60E-11 | 2.41E-10 | 14.16400092 |
| MTERF2  | -0.486130981 | 4.00079008 | -6.845228568 | 5.62E-11 | 2.41E-10 | 14.16109359 |
| CLUH    | -0.410425212 | 4.60305369 | -6.844312643 | 5.65E-11 | 2.43E-10 | 14.15579859 |
| LIN9    | -0.411555575 | 1.87046956 | -6.843783128 | 5.66E-11 | 2.43E-10 | 14.15273767 |
| CDK8    | -0.351083415 | 3.26134019 | -6.84086806  | 5.76E-11 | 2.48E-10 | 14.1358897  |
| SPPL3   | -0.38679895  | 5.25884355 | -6.840386357 | 5.78E-11 | 2.48E-10 | 14.13310611 |
| ZNF425  | -0.463612084 | 2.3751748  | -6.840309813 | 5.78E-11 | 2.48E-10 | 14.13266381 |
| GLOD4   | -0.380460659 | 5.27063665 | -6.840244268 | 5.78E-11 | 2.48E-10 | 14.13228506 |
| ZNF138  | -0.436785597 | 3.24643477 | -6.839453836 | 5.81E-11 | 2.49E-10 | 14.12771781 |
| ZNF14   | -0.452816476 | 3.63663715 | -6.839367785 | 5.81E-11 | 2.49E-10 | 14.12722062 |
| PPP1R7  | -0.62996675  | 6.13725398 | -6.838907937 | 5.83E-11 | 2.50E-10 | 14.12456373 |
| PPIL2   | -0.475509467 | 4.56658436 | -6.838529442 | 5.84E-11 | 2.51E-10 | 14.12237697 |
| CCDC61  | -0.440947653 | 4.20587181 | -6.837131227 | 5.89E-11 | 2.53E-10 | 14.11429948 |
| ARSI    | 0.630798017  | 0.70597156 | 6.836200441  | 5.92E-11 | 2.54E-10 | 14.10892297 |
| CLTB    | -0.410430612 | 6.91814067 | -6.835160629 | 5.96E-11 | 2.55E-10 | 14.10291728 |
| JDP2    | -0.562098145 | 3.16026885 | -6.833671688 | 6.01E-11 | 2.58E-10 | 14.09431864 |

|         |              |            |              |          |          |             |
|---------|--------------|------------|--------------|----------|----------|-------------|
| DDIT3   | -0.823063178 | 7.09662936 | -6.833221516 | 6.03E-11 | 2.58E-10 | 14.09171914 |
| MAGI2   | -0.485966554 | 2.41735511 | -6.833122995 | 6.03E-11 | 2.58E-10 | 14.09115026 |
| RAB41   | -0.367641161 | 1.51535652 | -6.832581183 | 6.05E-11 | 2.59E-10 | 14.08802179 |
| RAB9A   | -0.40730145  | 5.02268026 | -6.832549552 | 6.05E-11 | 2.59E-10 | 14.08783915 |
| NUP42   | -0.38171005  | 3.88629177 | -6.832133934 | 6.07E-11 | 2.60E-10 | 14.08543946 |
| UNC45A  | -0.375619371 | 5.18883507 | -6.830738347 | 6.12E-11 | 2.62E-10 | 14.07738236 |
| CLCN4   | -0.592820373 | 3.48475462 | -6.830282545 | 6.13E-11 | 2.62E-10 | 14.07475114 |
| ANO2    | -0.325855022 | 0.6174125  | -6.829930976 | 6.15E-11 | 2.63E-10 | 14.07272171 |
| RDH12   | -0.696293337 | 1.27837469 | -6.829448136 | 6.16E-11 | 2.64E-10 | 14.06993464 |
| SDR39U  | -0.470360059 | 3.42407117 | -6.826565895 | 6.27E-11 | 2.68E-10 | 14.05330046 |
| TCAF1   | -0.514372447 | 3.51714    | -6.825639808 | 6.30E-11 | 2.69E-10 | 14.04795679 |
| ASCC2   | -0.338532403 | 5.49108471 | -6.823671435 | 6.38E-11 | 2.72E-10 | 14.03660064 |
| TMEM22  | -0.431119871 | 5.40940113 | -6.823232819 | 6.39E-11 | 2.73E-10 | 14.03407044 |
| HIKESHI | -0.332220599 | 4.07184649 | -6.822652003 | 6.42E-11 | 2.74E-10 | 14.03072011 |
| HSCB    | -0.42764698  | 4.71897024 | -6.821011739 | 6.48E-11 | 2.77E-10 | 14.02125963 |
| NOL11   | -0.393353173 | 4.49088229 | -6.8195983   | 6.53E-11 | 2.79E-10 | 14.01310865 |
| ABRAXA  | -0.407398419 | 4.48762243 | -6.819594432 | 6.53E-11 | 2.79E-10 | 14.01308635 |
| PLAC9   | -0.920415029 | 3.61117962 | -6.818519583 | 6.57E-11 | 2.80E-10 | 14.00688872 |
| NACAD   | 0.566368618  | 1.27060216 | 6.817944194  | 6.60E-11 | 2.81E-10 | 14.00357129 |
| TMEM16  | -0.459693154 | 4.78191728 | -6.81676615  | 6.64E-11 | 2.83E-10 | 13.99677982 |
| CLEC2D  | 0.559929738  | 2.00616597 | 6.816334147  | 6.66E-11 | 2.84E-10 | 13.9942895  |
| DHFR2   | -0.487448759 | 3.11633915 | -6.815935988 | 6.68E-11 | 2.84E-10 | 13.99199438 |
| INKA2   | -0.396233772 | 1.7448753  | -6.813125914 | 6.79E-11 | 2.89E-10 | 13.97579882 |
| COX7A1  | -1.236642926 | 5.3836037  | -6.812142301 | 6.83E-11 | 2.91E-10 | 13.97013097 |
| ORC4    | -0.38934215  | 3.49326371 | -6.812058253 | 6.83E-11 | 2.91E-10 | 13.96964668 |
| SSPO    | -0.405836654 | 0.50954204 | -6.810198088 | 6.90E-11 | 2.94E-10 | 13.95892953 |
| AHCYL2  | -0.682518887 | 4.94906901 | -6.810090158 | 6.91E-11 | 2.94E-10 | 13.95830777 |
| NINJ1   | -0.440579719 | 7.48049739 | -6.80917706  | 6.95E-11 | 2.96E-10 | 13.95304784 |
| ZBPB    | -0.140359104 | 0.17197225 | -6.808442203 | 6.98E-11 | 2.97E-10 | 13.94881503 |
| FAM186F | -0.236965292 | 0.62360617 | -6.807233377 | 7.03E-11 | 2.99E-10 | 13.94185283 |
| PSMB2   | -0.326565173 | 5.85801315 | -6.806263656 | 7.07E-11 | 3.00E-10 | 13.93626836 |
| COL10A1 | 1.327313437  | 1.81197266 | 6.805553283  | 7.10E-11 | 3.02E-10 | 13.93217779 |
| ZFYVE9  | -0.600467302 | 4.2008473  | -6.804328701 | 7.15E-11 | 3.04E-10 | 13.92512692 |
| ZNF664  | -0.600174783 | 6.52706742 | -6.802992056 | 7.20E-11 | 3.06E-10 | 13.91743182 |
| EBP     | -0.361169234 | 5.23090945 | -6.80275755  | 7.21E-11 | 3.06E-10 | 13.91608187 |
| ORMDL3  | -0.603026304 | 7.2443338  | -6.802631586 | 7.22E-11 | 3.06E-10 | 13.91535676 |
| ZFYVE22 | -0.465185325 | 2.62818849 | -6.802572795 | 7.22E-11 | 3.07E-10 | 13.91501834 |
| MED30   | -0.463738982 | 4.06322866 | -6.801580912 | 7.26E-11 | 3.08E-10 | 13.90930896 |
| NPRL3   | -0.377132135 | 4.40125109 | -6.801332584 | 7.27E-11 | 3.09E-10 | 13.90787965 |
| MMP13   | 0.927042686  | 0.65434043 | 6.800258157  | 7.32E-11 | 3.10E-10 | 13.90169595 |



|         |              |            |              |          |          |             |
|---------|--------------|------------|--------------|----------|----------|-------------|
| AMOT    | 0.8672119    | 3.72188531 | 6.799926506  | 7.33E-11 | 3.11E-10 | 13.89978732 |
| CALCRL  | -0.846712788 | 4.40599043 | -6.798874353 | 7.38E-11 | 3.13E-10 | 13.89373267 |
| ATL3    | -0.433233191 | 5.28787173 | -6.79736113  | 7.45E-11 | 3.16E-10 | 13.88502592 |
| SHQ1    | -0.373532091 | 3.28321063 | -6.797034825 | 7.46E-11 | 3.16E-10 | 13.88314861 |
| TRNT1   | -0.380209859 | 3.41859509 | -6.796610892 | 7.48E-11 | 3.17E-10 | 13.88070971 |
| CROT    | -0.662946634 | 5.27453811 | -6.796532576 | 7.48E-11 | 3.17E-10 | 13.88025918 |
| RAC2    | 1.226372973  | 4.4644898  | 6.795572267  | 7.53E-11 | 3.19E-10 | 13.87473494 |
| SLC25A1 | -0.474573396 | 4.50658849 | -6.795158268 | 7.54E-11 | 3.19E-10 | 13.87235354 |
| NDUFS1  | -0.482835998 | 4.42714406 | -6.795140544 | 7.54E-11 | 3.19E-10 | 13.8722516  |
| IRS4    | -0.412561271 | 0.35837138 | -6.794982389 | 7.55E-11 | 3.19E-10 | 13.87134189 |
| FANCC   | -0.383472378 | 2.15605281 | -6.794606898 | 7.57E-11 | 3.20E-10 | 13.86918213 |
| FUT1    | -0.430383147 | 2.62538643 | -6.793231962 | 7.63E-11 | 3.23E-10 | 13.86127444 |
| REEP1   | -0.580895126 | 1.14076315 | -6.790825906 | 7.74E-11 | 3.27E-10 | 13.84743912 |
| RORC    | -0.619728576 | 4.82676763 | -6.790185225 | 7.77E-11 | 3.28E-10 | 13.84375565 |
| METTL2  | -0.300477751 | 2.1443041  | -6.787259303 | 7.90E-11 | 3.34E-10 | 13.82693668 |
| PLA2G3  | -0.743065386 | 0.99251054 | -6.786870471 | 7.92E-11 | 3.35E-10 | 13.82470195 |
| RFLNB   | -0.724730282 | 4.34630256 | -6.785499861 | 7.98E-11 | 3.37E-10 | 13.81682536 |
| DAP3    | -0.366944106 | 5.70117    | -6.783721753 | 8.07E-11 | 3.41E-10 | 13.80660862 |
| CCDC17  | -0.64278024  | 2.69257705 | -6.783413461 | 8.08E-11 | 3.41E-10 | 13.80483741 |
| SLC50A1 | -0.383460832 | 6.14739666 | -6.782876525 | 8.11E-11 | 3.42E-10 | 13.80175272 |
| H2AFZ   | -0.411686651 | 6.67789666 | -6.782817242 | 8.11E-11 | 3.42E-10 | 13.80141215 |
| CYHR1   | -0.423738961 | 4.39732539 | -6.781586198 | 8.17E-11 | 3.45E-10 | 13.7943405  |
| DERPC   | -0.580940298 | 6.13123517 | -6.781383845 | 8.18E-11 | 3.45E-10 | 13.79317818 |
| CHTF8   | -0.580940298 | 6.13123517 | -6.781383845 | 8.18E-11 | 3.45E-10 | 13.79317818 |
| RPL27   | -0.427945305 | 9.33799644 | -6.780364974 | 8.23E-11 | 3.47E-10 | 13.78732614 |
| FANCF   | -0.3709894   | 3.61297554 | -6.779112192 | 8.29E-11 | 3.49E-10 | 13.78013143 |
| RAB24   | -0.478108704 | 3.78494222 | -6.778908237 | 8.30E-11 | 3.50E-10 | 13.77896021 |
| ARFGAP  | -0.567005902 | 5.87804759 | -6.7780058   | 8.34E-11 | 3.51E-10 | 13.77377821 |
| GLTPD2  | -0.417867732 | 1.29323015 | -6.777094269 | 8.39E-11 | 3.53E-10 | 13.76854448 |
| TIGD5   | -0.379914347 | 3.34808463 | -6.776749784 | 8.40E-11 | 3.54E-10 | 13.76656667 |
| PAK6    | -0.213283291 | 0.50745346 | -6.775976063 | 8.44E-11 | 3.55E-10 | 13.76212474 |
| LIMK2   | -0.583029117 | 5.12402196 | -6.775313602 | 8.48E-11 | 3.57E-10 | 13.75832183 |
| EID3    | -0.473065419 | 1.8093714  | -6.774281594 | 8.53E-11 | 3.59E-10 | 13.75239803 |
| MNS1    | -0.458597577 | 2.17998127 | -6.774038589 | 8.54E-11 | 3.59E-10 | 13.75100325 |
| YJU2    | -0.387283357 | 5.66184804 | -6.772610026 | 8.61E-11 | 3.62E-10 | 13.74280443 |
| MFSD9   | -0.444320814 | 2.70209553 | -6.771703213 | 8.66E-11 | 3.64E-10 | 13.73760066 |
| NDUFA4  | -0.869981505 | 5.01797241 | -6.771456989 | 8.67E-11 | 3.64E-10 | 13.73618779 |
| USP7    | -0.397389318 | 5.29993772 | -6.771203674 | 8.68E-11 | 3.65E-10 | 13.73473425 |
| CDK20   | -0.423300391 | 2.90647607 | -6.770180982 | 8.73E-11 | 3.67E-10 | 13.72886639 |
| BCL2L2  | -0.540440255 | 5.49975067 | -6.768859195 | 8.80E-11 | 3.70E-10 | 13.72128334 |

|          |              |            |              |          |          |             |
|----------|--------------|------------|--------------|----------|----------|-------------|
| NNT      | -0.666810451 | 4.7102648  | -6.767811525 | 8.86E-11 | 3.72E-10 | 13.71527362 |
| FOXP3    | 0.733983163  | 1.72949258 | 6.765240895  | 8.99E-11 | 3.77E-10 | 13.70053053 |
| MST1R    | 0.874684009  | 2.70193995 | 6.763473454  | 9.08E-11 | 3.81E-10 | 13.69039615 |
| F12      | -0.553317015 | 1.15289361 | -6.762861945 | 9.12E-11 | 3.82E-10 | 13.68689023 |
| ZNF589   | -0.486222218 | 3.70785754 | -6.762097753 | 9.16E-11 | 3.84E-10 | 13.68250926 |
| TOR3A    | -0.392257327 | 4.85002428 | -6.762011701 | 9.16E-11 | 3.84E-10 | 13.68201596 |
| TRMT61I  | -0.487992664 | 3.59106182 | -6.760949979 | 9.22E-11 | 3.86E-10 | 13.67592993 |
| PSMD12   | -0.347374421 | 4.68236652 | -6.760920854 | 9.22E-11 | 3.86E-10 | 13.67576298 |
| TRPV6    | -0.629702879 | 0.80586087 | -6.758967858 | 9.33E-11 | 3.91E-10 | 13.66456973 |
| ILDR1    | -0.563624393 | 4.53592171 | -6.758403161 | 9.36E-11 | 3.92E-10 | 13.66133369 |
| FMNL3    | -0.481543067 | 4.11709837 | -6.75761885  | 9.40E-11 | 3.94E-10 | 13.65683944 |
| TIMP1    | 1.533704515  | 9.34593253 | 6.757099349  | 9.43E-11 | 3.95E-10 | 13.6538628  |
| EPS15L1  | -0.338288181 | 3.80750212 | -6.756201865 | 9.48E-11 | 3.97E-10 | 13.64872077 |
| PLXNC1   | 1.140974127  | 3.86454969 | 6.756149247  | 9.48E-11 | 3.97E-10 | 13.64841932 |
| VMAC     | -0.376242734 | 3.09363362 | -6.754797847 | 9.56E-11 | 4.00E-10 | 13.64067758 |
| SYNGR3   | 0.458039333  | 0.797242   | 6.754616521  | 9.57E-11 | 4.00E-10 | 13.6396389  |
| ITGAM    | 0.785483514  | 2.50748809 | 6.753729138  | 9.62E-11 | 4.02E-10 | 13.63455604 |
| CIRBP    | -0.500995665 | 7.82742745 | -6.752440771 | 9.69E-11 | 4.05E-10 | 13.62717721 |
| LRPAP1   | -0.481470822 | 6.30081109 | -6.750791144 | 9.78E-11 | 4.09E-10 | 13.61773077 |
| MMP16    | 0.991275182  | 1.91490411 | 6.749914447  | 9.84E-11 | 4.11E-10 | 13.6127111  |
| WDR45B   | -0.412327324 | 6.03132113 | -6.749613338 | 9.85E-11 | 4.12E-10 | 13.61098716 |
| IFIT5    | 0.656003302  | 4.44851779 | 6.749490052  | 9.86E-11 | 4.12E-10 | 13.61028132 |
| EED      | -0.321475531 | 2.78326607 | -6.748565757 | 9.91E-11 | 4.14E-10 | 13.60498984 |
| RFX8     | -0.461906039 | 0.95981806 | -6.748008555 | 9.95E-11 | 4.15E-10 | 13.60180018 |
| STK19    | -0.400181632 | 3.4105495  | -6.747947776 | 9.95E-11 | 4.15E-10 | 13.60145226 |
| ZNF287   | -0.441921213 | 2.75087908 | -6.747797696 | 9.96E-11 | 4.15E-10 | 13.60059317 |
| SNRPD2   | -0.421856714 | 7.85017386 | -6.747234813 | 9.99E-11 | 4.17E-10 | 13.59737124 |
| ABHD1    | -0.290373498 | 0.65982944 | -6.746391219 | 1.00E-10 | 4.19E-10 | 13.59254287 |
| DPH6     | -0.313969356 | 2.22227981 | -6.745421629 | 1.01E-10 | 4.21E-10 | 13.58699387 |
| ZDHHC7   | -0.421851631 | 5.34414278 | -6.743636812 | 1.02E-10 | 4.25E-10 | 13.57678076 |
| BLOC1S   | -0.372563415 | 5.50684165 | -6.74226175  | 1.03E-10 | 4.29E-10 | 13.56891363 |
| C17orf58 | -0.395248068 | 4.69780258 | -6.74128275  | 1.03E-10 | 4.31E-10 | 13.56331318 |
| DDX50    | -0.461173545 | 5.64748544 | -6.741047428 | 1.04E-10 | 4.31E-10 | 13.56196709 |
| CAMK2N   | 1.515795627  | 6.41040615 | 6.740916918  | 1.04E-10 | 4.32E-10 | 13.56122055 |
| LYPLA1   | -0.460547118 | 4.24030589 | -6.74091438  | 1.04E-10 | 4.32E-10 | 13.56120603 |
| PGRMC2   | -0.448447058 | 6.15594799 | -6.740876137 | 1.04E-10 | 4.32E-10 | 13.56098728 |
| AASDH    | -0.478582557 | 3.08680691 | -6.740823135 | 1.04E-10 | 4.32E-10 | 13.5606841  |
| BTF3     | -0.395966097 | 8.82833523 | -6.739398176 | 1.05E-10 | 4.35E-10 | 13.5525339  |
| INHBA    | 0.942484454  | 2.0541601  | 6.739312388  | 1.05E-10 | 4.35E-10 | 13.55204327 |
| SLC25A2  | -0.46409325  | 6.69773882 | -6.738607049 | 1.05E-10 | 4.37E-10 | 13.54800949 |

|         |              |            |              |          |          |             |
|---------|--------------|------------|--------------|----------|----------|-------------|
| RBM34   | -0.257363879 | 1.48069139 | -6.738297941 | 1.05E-10 | 4.38E-10 | 13.54624182 |
| TMEM19  | -0.230567914 | 0.44985281 | -6.737792695 | 1.06E-10 | 4.39E-10 | 13.54335263 |
| DELE1   | -0.394726798 | 5.15908327 | -6.737203544 | 1.06E-10 | 4.40E-10 | 13.53998382 |
| DHPS    | -0.3415258   | 5.55717526 | -6.73714007  | 1.06E-10 | 4.40E-10 | 13.53962088 |
| ASPA    | -0.367851988 | 0.6403835  | -6.736769253 | 1.06E-10 | 4.41E-10 | 13.53750065 |
| ZNF613  | -0.396961841 | 2.78166323 | -6.736232609 | 1.07E-10 | 4.42E-10 | 13.53443241 |
| FSIP1   | -0.268595895 | 0.76211266 | -6.736049996 | 1.07E-10 | 4.43E-10 | 13.53338836 |
| SHISA2  | -1.207998528 | 5.85745662 | -6.735927397 | 1.07E-10 | 4.43E-10 | 13.53268744 |
| MRM1    | -0.386897605 | 3.7942486  | -6.735689241 | 1.07E-10 | 4.43E-10 | 13.53132589 |
| KCTD18  | -0.520333425 | 3.87469295 | -6.735606844 | 1.07E-10 | 4.44E-10 | 13.53085483 |
| CDR2    | -0.486721095 | 5.21132304 | -6.733654927 | 1.08E-10 | 4.49E-10 | 13.51969697 |
| ATRN    | -0.601843588 | 5.34257521 | -6.73346633  | 1.08E-10 | 4.49E-10 | 13.518619   |
| BLOC1S1 | -0.408467136 | 3.84090104 | -6.733104808 | 1.09E-10 | 4.50E-10 | 13.51655269 |
| DIABLO  | -0.407390194 | 2.48892826 | -6.732758473 | 1.09E-10 | 4.51E-10 | 13.51457327 |
| ITGA10  | -0.565739314 | 1.66603049 | -6.729389821 | 1.11E-10 | 4.59E-10 | 13.49532393 |
| ZFP82   | -0.349480934 | 2.06482715 | -6.729170359 | 1.11E-10 | 4.60E-10 | 13.49407011 |
| LMNTD1  | -0.270497783 | 0.20764168 | -6.728933482 | 1.11E-10 | 4.60E-10 | 13.49271681 |
| ARHGEF  | -0.50257054  | 3.79344459 | -6.728454067 | 1.11E-10 | 4.62E-10 | 13.48997799 |
| PALMD   | -0.544708505 | 2.49111114 | -6.728050045 | 1.12E-10 | 4.63E-10 | 13.48766998 |
| BNIP3   | -0.506244947 | 4.49607939 | -6.726904593 | 1.13E-10 | 4.66E-10 | 13.48112702 |
| LARS    | -0.405005    | 5.22760341 | -6.726627228 | 1.13E-10 | 4.66E-10 | 13.47954279 |
| PIGT    | -0.527089806 | 7.56464425 | -6.726513475 | 1.13E-10 | 4.66E-10 | 13.47889309 |
| DRAM1   | 0.802475875  | 4.17590568 | 6.726310614  | 1.13E-10 | 4.67E-10 | 13.47773444 |
| C9orf40 | -0.333906029 | 2.63806473 | -6.723026662 | 1.15E-10 | 4.76E-10 | 13.45898158 |
| ZFPM1   | -0.430898439 | 2.20272996 | -6.722954296 | 1.15E-10 | 4.76E-10 | 13.45856841 |
| CHRNA7  | -0.384609382 | 0.52311459 | -6.722031993 | 1.16E-10 | 4.78E-10 | 13.45330283 |
| NXT1    | -0.374606366 | 5.20873869 | -6.721985299 | 1.16E-10 | 4.78E-10 | 13.45303626 |
| CST2    | 1.664916015  | 2.04151652 | 6.721688677  | 1.16E-10 | 4.79E-10 | 13.45134291 |
| PPP2R5C | -0.385531578 | 4.74761162 | -6.721662478 | 1.16E-10 | 4.79E-10 | 13.45119335 |
| OSCAR   | 0.858535142  | 2.30833697 | 6.71978686   | 1.17E-10 | 4.84E-10 | 13.4404871  |
| GOLGA1  | -0.432552927 | 3.53569192 | -6.719617494 | 1.17E-10 | 4.84E-10 | 13.43952044 |
| ERVK3-1 | -0.403080388 | 3.25856993 | -6.717455161 | 1.19E-10 | 4.90E-10 | 13.4271804  |
| TSPAN1  | -0.401428154 | 4.39311508 | -6.71628633  | 1.20E-10 | 4.94E-10 | 13.42051125 |
| FAM174F | -0.576125988 | 5.77380516 | -6.716278041 | 1.20E-10 | 4.94E-10 | 13.42046396 |
| BRF2    | -0.498799808 | 3.01795222 | -6.71495484  | 1.21E-10 | 4.97E-10 | 13.41291499 |
| SLC38A1 | -0.447656274 | 6.49834094 | -6.713134031 | 1.22E-10 | 5.03E-10 | 13.40252882 |
| SAP30B  | -0.34563183  | 4.40331787 | -6.71135936  | 1.23E-10 | 5.08E-10 | 13.39240773 |
| CRY1    | -0.525811739 | 4.14992853 | -6.711171839 | 1.23E-10 | 5.08E-10 | 13.39133839 |
| EGF     | -0.633342443 | 0.95178299 | -6.706715526 | 1.27E-10 | 5.21E-10 | 13.36593242 |
| GJC3    | -0.20422163  | 0.41911906 | -6.705725205 | 1.27E-10 | 5.24E-10 | 13.36028809 |

|          |              |            |              |          |          |             |
|----------|--------------|------------|--------------|----------|----------|-------------|
| OPA3     | -0.367913114 | 3.52140096 | -6.704369069 | 1.28E-10 | 5.28E-10 | 13.35255974 |
| C11orf98 | -0.423801867 | 3.56657764 | -6.703606124 | 1.29E-10 | 5.30E-10 | 13.34821235 |
| ZNF814   | -0.376227248 | 2.30457809 | -6.702435503 | 1.30E-10 | 5.34E-10 | 13.34154262 |
| AMIGO1   | -0.482692816 | 3.87097819 | -6.69896779  | 1.32E-10 | 5.45E-10 | 13.32178979 |
| NRXN2    | -0.724194205 | 1.48211456 | -6.69815833  | 1.33E-10 | 5.47E-10 | 13.31717996 |
| PARD6G   | -0.495106407 | 4.20832921 | -6.697964433 | 1.33E-10 | 5.48E-10 | 13.31607579 |
| DDIT4L   | -0.578150294 | 0.87033133 | -6.697124428 | 1.34E-10 | 5.50E-10 | 13.31129252 |
| PHACTR   | 0.559309135  | 0.69103021 | 6.697014326  | 1.34E-10 | 5.50E-10 | 13.31066559 |
| MRT04    | -0.339664185 | 5.06349555 | -6.69652005  | 1.34E-10 | 5.52E-10 | 13.30785124 |
| MED4     | -0.348578936 | 5.75411216 | -6.696516597 | 1.34E-10 | 5.52E-10 | 13.30783159 |
| KAT2B    | -0.638981838 | 4.35350217 | -6.696463978 | 1.34E-10 | 5.52E-10 | 13.30753199 |
| BTBD17   | -0.872213436 | 0.59821429 | -6.696131274 | 1.35E-10 | 5.53E-10 | 13.30563771 |
| DCUN1D   | -0.434799559 | 3.43554935 | -6.695365799 | 1.35E-10 | 5.55E-10 | 13.30127966 |
| DNAJB1   | -0.312830033 | 5.31106763 | -6.695172515 | 1.35E-10 | 5.56E-10 | 13.3001793  |
| FAF2     | -0.457612089 | 4.95914369 | -6.693913102 | 1.36E-10 | 5.59E-10 | 13.29301003 |
| EXOC6    | -0.537485648 | 4.73719901 | -6.692484544 | 1.37E-10 | 5.64E-10 | 13.28487904 |
| EIF4H    | -0.492205738 | 7.69542202 | -6.691693604 | 1.38E-10 | 5.66E-10 | 13.28037774 |
| BYSL     | -0.379623378 | 3.91550756 | -6.690121045 | 1.39E-10 | 5.71E-10 | 13.27142928 |
| LYNX1    | 0.751930796  | 3.98179082 | 6.690099415  | 1.39E-10 | 5.71E-10 | 13.27130621 |
| SORD     | -0.897090931 | 6.20583374 | -6.688124873 | 1.41E-10 | 5.78E-10 | 13.26007243 |
| BLOC1S1  | -0.351027162 | 3.8938028  | -6.685842861 | 1.43E-10 | 5.85E-10 | 13.24709226 |
| SYN1     | 0.769045215  | 1.35397372 | 6.685026391  | 1.44E-10 | 5.88E-10 | 13.2424489  |
| VPS26B   | -0.368623799 | 4.75413015 | -6.684289115 | 1.44E-10 | 5.91E-10 | 13.23825627 |
| KHK      | -0.483560457 | 1.79322945 | -6.683693878 | 1.45E-10 | 5.92E-10 | 13.2348716  |
| C19orf44 | -0.364814554 | 2.97993767 | -6.683546165 | 1.45E-10 | 5.93E-10 | 13.2340317  |
| PRPF31   | -0.381411826 | 5.99678747 | -6.682806889 | 1.45E-10 | 5.95E-10 | 13.22982835 |
| BEND6    | 0.574821365  | 0.89982564 | 6.681272044  | 1.47E-10 | 6.00E-10 | 13.22110262 |
| DDX23    | -0.419988802 | 5.69374689 | -6.680975372 | 1.47E-10 | 6.01E-10 | 13.21941618 |
| KBTBD6   | -0.428227162 | 3.33041887 | -6.680837491 | 1.47E-10 | 6.02E-10 | 13.2186324  |
| HUS1     | -0.338763177 | 3.36180997 | -6.680482659 | 1.47E-10 | 6.03E-10 | 13.21661545 |
| ATP1B2   | -1.097937833 | 3.42039252 | -6.679666412 | 1.48E-10 | 6.05E-10 | 13.21197596 |
| SF3A3    | -0.3841287   | 5.54134567 | -6.677817393 | 1.50E-10 | 6.12E-10 | 13.20146777 |
| PCIF1    | -0.389217208 | 6.05422599 | -6.677726766 | 1.50E-10 | 6.12E-10 | 13.20095278 |
| INTS10   | -0.434707158 | 5.06255891 | -6.676727594 | 1.51E-10 | 6.15E-10 | 13.19527528 |
| KDF1     | -0.400838936 | 5.35246742 | -6.676467803 | 1.51E-10 | 6.16E-10 | 13.19379918 |
| RPL31    | -0.454749768 | 8.50906527 | -6.676020398 | 1.51E-10 | 6.18E-10 | 13.19125719 |
| SELENO1  | -0.507246283 | 8.43128461 | -6.674998305 | 1.52E-10 | 6.21E-10 | 13.1854505  |
| OPN1SV   | -0.490952845 | 2.33135235 | -6.674923483 | 1.52E-10 | 6.21E-10 | 13.18502544 |
| LSM8     | -0.287710462 | 3.46121097 | -6.674421543 | 1.53E-10 | 6.23E-10 | 13.18217408 |
| AS3MT    | -0.268700069 | 0.56560158 | -6.673743213 | 1.53E-10 | 6.25E-10 | 13.17832094 |

|         |              |            |              |          |          |             |
|---------|--------------|------------|--------------|----------|----------|-------------|
| LRRC46  | -0.427809148 | 2.34661896 | -6.673353963 | 1.54E-10 | 6.27E-10 | 13.17610999 |
| DPY19L2 | -0.798340433 | 2.27125016 | -6.671691489 | 1.55E-10 | 6.32E-10 | 13.16666813 |
| NKAPD1  | -0.380146223 | 4.29024858 | -6.67018992  | 1.57E-10 | 6.38E-10 | 13.15814154 |
| RPL7    | -0.474228041 | 9.13334203 | -6.669154401 | 1.57E-10 | 6.42E-10 | 13.15226218 |
| CRYBG2  | 0.523151826  | 0.76027296 | 6.667254752  | 1.59E-10 | 6.48E-10 | 13.14147822 |
| PDCD2L  | -0.347588758 | 3.42433231 | -6.666485603 | 1.60E-10 | 6.51E-10 | 13.13711251 |
| TANGO2  | -0.466253927 | 4.30944268 | -6.666391499 | 1.60E-10 | 6.51E-10 | 13.1365784  |
| JHY     | -0.399675879 | 2.43842158 | -6.666332629 | 1.60E-10 | 6.51E-10 | 13.13624427 |
| ZBTB17  | -0.341481889 | 4.28338787 | -6.666324067 | 1.60E-10 | 6.51E-10 | 13.13619567 |
| TEKT3   | -0.289327553 | 0.49722858 | -6.665366708 | 1.61E-10 | 6.55E-10 | 13.13076227 |
| IL2RA   | 0.693090847  | 1.37514255 | 6.663428378  | 1.63E-10 | 6.62E-10 | 13.11976314 |
| H1FO    | -0.570824143 | 7.71083804 | -6.663259703 | 1.63E-10 | 6.63E-10 | 13.1188061  |
| FAM122A | -0.448996556 | 4.21022136 | -6.663202376 | 1.63E-10 | 6.63E-10 | 13.11848083 |
| LINS1   | -0.373825308 | 2.82314766 | -6.662811328 | 1.63E-10 | 6.64E-10 | 13.11626214 |
| EPHB1   | -0.777986948 | 2.02778062 | -6.66093563  | 1.65E-10 | 6.71E-10 | 13.10562125 |
| SPECC1  | 0.566508776  | 2.71687228 | 6.659371939  | 1.67E-10 | 6.77E-10 | 13.096752   |
| MRPS2   | -0.364594637 | 5.294397   | -6.659249133 | 1.67E-10 | 6.77E-10 | 13.0960555  |
| PRDM16  | -0.7419212   | 3.01543319 | -6.659017668 | 1.67E-10 | 6.78E-10 | 13.09474277 |
| TTLL7   | -0.495393069 | 1.01189228 | -6.658201017 | 1.68E-10 | 6.81E-10 | 13.09011149 |
| DTX3    | -0.471465141 | 4.94722381 | -6.657976535 | 1.68E-10 | 6.82E-10 | 13.0888385  |
| DEDD2   | -0.398934846 | 5.10681237 | -6.657027879 | 1.69E-10 | 6.85E-10 | 13.08345923 |
| TIPIN   | -0.367022244 | 2.69624568 | -6.655403892 | 1.71E-10 | 6.92E-10 | 13.07425182 |
| BLOC1S1 | -0.480377338 | 6.23902478 | -6.653270553 | 1.73E-10 | 7.00E-10 | 13.06215896 |
| SPATA1  | 0.176517475  | 0.25448619 | 6.653155775  | 1.73E-10 | 7.01E-10 | 13.06150841 |
| DDX19A  | -0.374663262 | 4.06106032 | -6.652848035 | 1.73E-10 | 7.02E-10 | 13.05976423 |
| TRIM2   | -0.646652037 | 5.30188572 | -6.652217001 | 1.74E-10 | 7.04E-10 | 13.05618789 |
| SIGLEC6 | 1.292377796  | 1.2666038  | 6.652010466  | 1.74E-10 | 7.05E-10 | 13.05501742 |
| DMBX1   | 1.048238067  | 1.13985598 | 6.6485608    | 1.77E-10 | 7.19E-10 | 13.03547133 |
| RIN1    | 0.678487154  | 2.20250595 | 6.647852648  | 1.78E-10 | 7.22E-10 | 13.03145977 |
| HSD17B1 | -1.552948408 | 4.23786704 | -6.646348529 | 1.80E-10 | 7.28E-10 | 13.02294018 |
| LIN37   | -0.31935267  | 2.25949238 | -6.645424155 | 1.81E-10 | 7.31E-10 | 13.01770504 |
| MRPL55  | -0.437858982 | 5.7978663  | -6.644772902 | 1.81E-10 | 7.34E-10 | 13.01401701 |
| RBM18   | -0.430546319 | 4.22424373 | -6.64430269  | 1.82E-10 | 7.36E-10 | 13.01135437 |
| USP21   | -0.404469939 | 4.53184965 | -6.644112689 | 1.82E-10 | 7.36E-10 | 13.01027851 |
| PHYKPL  | -0.407233188 | 3.86700456 | -6.641818306 | 1.84E-10 | 7.46E-10 | 12.99728843 |
| WRAP53  | -0.341759574 | 2.6084817  | -6.640687423 | 1.86E-10 | 7.51E-10 | 12.99088688 |
| PLCL2   | -0.508864169 | 1.99863396 | -6.640144126 | 1.86E-10 | 7.53E-10 | 12.98781173 |
| ABI3    | -0.576061283 | 4.05770248 | -6.639032668 | 1.87E-10 | 7.58E-10 | 12.98152126 |
| STARD1  | -0.449614929 | 5.6336053  | -6.638970183 | 1.88E-10 | 7.58E-10 | 12.98116764 |
| CACNA2  | -1.013877981 | 2.80555902 | -6.63870801  | 1.88E-10 | 7.59E-10 | 12.97968395 |

|         |              |            |              |          |          |             |
|---------|--------------|------------|--------------|----------|----------|-------------|
| SETD6   | -0.385649265 | 3.23108104 | -6.634910283 | 1.92E-10 | 7.75E-10 | 12.95819645 |
| FXYD3   | 0.999078655  | 1.20425208 | 6.634684803  | 1.92E-10 | 7.76E-10 | 12.95692096 |
| RPL18A  | -0.492267342 | 7.86535355 | -6.634620511 | 1.92E-10 | 7.76E-10 | 12.95655728 |
| CDSN    | 0.503754652  | 0.60639906 | 6.632846542  | 1.94E-10 | 7.84E-10 | 12.94652347 |
| SMO     | -0.723432785 | 4.22663391 | -6.628594962 | 1.99E-10 | 8.04E-10 | 12.92248364 |
| SLC25A2 | -0.324917368 | 5.48261198 | -6.627409499 | 2.01E-10 | 8.09E-10 | 12.91578259 |
| HARS    | -0.312759405 | 4.58362242 | -6.62729337  | 2.01E-10 | 8.09E-10 | 12.91512619 |
| REELD1  | 0.620570662  | 0.84483696 | 6.625958205  | 2.02E-10 | 8.15E-10 | 12.90758002 |
| E4F1    | -0.441963712 | 4.28362039 | -6.624678945 | 2.04E-10 | 8.21E-10 | 12.90035083 |
| NUDT12  | -0.519729809 | 4.30411314 | -6.622929692 | 2.06E-10 | 8.29E-10 | 12.89046727 |
| DOK6    | -0.464781077 | 0.80139714 | -6.622490255 | 2.06E-10 | 8.31E-10 | 12.88798466 |
| CBWD5   | -0.18205972  | 0.59516358 | -6.622284577 | 2.07E-10 | 8.32E-10 | 12.88682273 |
| CXCL8   | 1.223344019  | 2.53834558 | 6.622188224  | 2.07E-10 | 8.32E-10 | 12.88627841 |
| USP20   | -0.438528038 | 5.13026917 | -6.620881536 | 2.08E-10 | 8.38E-10 | 12.87889719 |
| PAAF1   | -0.362554647 | 3.39003336 | -6.620640053 | 2.09E-10 | 8.39E-10 | 12.87753322 |
| ZBED8   | -0.438234429 | 3.28298594 | -6.620505831 | 2.09E-10 | 8.40E-10 | 12.87677511 |
| RDX     | -0.645332872 | 5.22501166 | -6.619998468 | 2.09E-10 | 8.42E-10 | 12.87390951 |
| PWP1    | -0.359322545 | 5.44731377 | -6.619383581 | 2.10E-10 | 8.45E-10 | 12.87043682 |
| OLR1    | 1.051363168  | 2.84659846 | 6.6189123    | 2.11E-10 | 8.47E-10 | 12.86777533 |
| ZNF212  | -0.413702294 | 4.04050086 | -6.618459994 | 2.11E-10 | 8.49E-10 | 12.86522112 |
| FDXR    | -0.528032386 | 4.30346632 | -6.615637572 | 2.15E-10 | 8.63E-10 | 12.84928547 |
| CNOT10  | -0.316548281 | 4.07862142 | -6.615516547 | 2.15E-10 | 8.63E-10 | 12.84860226 |
| CYB561C | -0.452647634 | 3.76441998 | -6.613425453 | 2.17E-10 | 8.73E-10 | 12.836799   |
| EREG    | 0.71949983   | 0.58771595 | 6.610976499  | 2.20E-10 | 8.86E-10 | 12.82297915 |
| SPRY4   | -0.674517628 | 4.76129102 | -6.610283321 | 2.21E-10 | 8.89E-10 | 12.81906808 |
| PANK1   | -0.625796947 | 2.47820746 | -6.609215595 | 2.23E-10 | 8.94E-10 | 12.81304431 |
| COX18   | -0.318052211 | 3.1329105  | -6.609178283 | 2.23E-10 | 8.94E-10 | 12.81283382 |
| FAM8A1  | -0.51565623  | 5.2576672  | -6.608850294 | 2.23E-10 | 8.96E-10 | 12.81098355 |
| RPL35A  | -0.413707158 | 8.82337937 | -6.604897413 | 2.28E-10 | 9.16E-10 | 12.7886895  |
| FBXO5   | -0.451864789 | 2.29247487 | -6.604891597 | 2.28E-10 | 9.16E-10 | 12.78865671 |
| SYDE1   | -0.496367423 | 3.22736736 | -6.604406434 | 2.29E-10 | 9.18E-10 | 12.78592106 |
| VPS29   | -0.312901276 | 5.7764143  | -6.602073131 | 2.32E-10 | 9.31E-10 | 12.77276647 |
| COMP    | 1.824566751  | 3.67670279 | 6.598610114  | 2.37E-10 | 9.49E-10 | 12.75324889 |
| ZBTB5   | -0.490367134 | 3.7494125  | -6.598205497 | 2.37E-10 | 9.51E-10 | 12.75096894 |
| THAP5   | -0.458590487 | 4.05759116 | -6.597969617 | 2.38E-10 | 9.52E-10 | 12.74963985 |
| ZNF689  | -0.389715361 | 3.33933039 | -6.59687993  | 2.39E-10 | 9.58E-10 | 12.74350029 |
| CLIP3   | 0.967800682  | 3.8686484  | 6.596426669  | 2.40E-10 | 9.60E-10 | 12.74094671 |
| ASPH    | -0.653396008 | 3.99078652 | -6.596300381 | 2.40E-10 | 9.61E-10 | 12.74023526 |
| RPL5    | -0.421025973 | 10.1895448 | -6.596194324 | 2.40E-10 | 9.61E-10 | 12.73963779 |
| GSPT1   | -0.454767021 | 5.52732109 | -6.596099754 | 2.40E-10 | 9.61E-10 | 12.73910503 |

|          |              |            |              |          |          |             |
|----------|--------------|------------|--------------|----------|----------|-------------|
| ARRDC4   | -0.716486438 | 4.50911811 | -6.595996425 | 2.40E-10 | 9.62E-10 | 12.73852293 |
| C17orf50 | -0.374580284 | 0.68729635 | -6.595564912 | 2.41E-10 | 9.64E-10 | 12.73609211 |
| CHRA1    | -0.367577675 | 5.19886719 | -6.594136847 | 2.43E-10 | 9.72E-10 | 12.72804828 |
| LRIG1    | -0.596734794 | 3.99221466 | -6.593636971 | 2.44E-10 | 9.74E-10 | 12.72523293 |
| LAMC3    | -0.607855645 | 0.86595746 | -6.593505385 | 2.44E-10 | 9.75E-10 | 12.72449184 |
| SH3RF1   | -0.62781202  | 4.19273712 | -6.593087067 | 2.44E-10 | 9.77E-10 | 12.72213599 |
| CARTPT   | -2.036359126 | 1.82840687 | -6.592476972 | 2.45E-10 | 9.80E-10 | 12.71870028 |
| SMYD4    | -0.380720488 | 2.84835877 | -6.590801784 | 2.48E-10 | 9.89E-10 | 12.70926773 |
| ZDHHC1   | -0.374142236 | 2.02723216 | -6.589726207 | 2.49E-10 | 9.95E-10 | 12.70321233 |
| CYP7B1   | -0.701693718 | 2.35506789 | -6.585931293 | 2.55E-10 | 1.02E-09 | 12.68185291 |
| COL4A5   | -0.792708588 | 3.11698258 | -6.584974477 | 2.56E-10 | 1.02E-09 | 12.67646892 |
| HIST2H4  | -0.16295841  | 0.27917331 | -6.584931573 | 2.56E-10 | 1.02E-09 | 12.67622751 |
| OTUD7A   | -0.241953902 | 0.69920702 | -6.584342184 | 2.57E-10 | 1.03E-09 | 12.67291131 |
| AK3      | -0.45010843  | 5.88123055 | -6.583687212 | 2.58E-10 | 1.03E-09 | 12.66922636 |
| CACNB2   | -0.51456239  | 1.14029021 | -6.582781342 | 2.59E-10 | 1.03E-09 | 12.66413026 |
| BRMS1L   | -0.442738712 | 3.16743587 | -6.581866806 | 2.61E-10 | 1.04E-09 | 12.6589859  |
| HEBP2    | -0.328530672 | 4.03921163 | -6.580383677 | 2.63E-10 | 1.05E-09 | 12.65064423 |
| LRRIQ1   | -0.316477957 | 0.76324017 | -6.57974924  | 2.64E-10 | 1.05E-09 | 12.64707634 |
| ZFAND1   | -0.447564502 | 4.75026481 | -6.578388996 | 2.66E-10 | 1.06E-09 | 12.63942752 |
| FUT2     | 0.493152113  | 1.42061335 | 6.578107895  | 2.66E-10 | 1.06E-09 | 12.63784699 |
| DHTKD1   | -0.515218679 | 4.20779936 | -6.575214115 | 2.71E-10 | 1.08E-09 | 12.62157913 |
| MLLT1    | -0.507623052 | 5.77650829 | -6.573779941 | 2.73E-10 | 1.09E-09 | 12.61351858 |
| SLC9A3F  | -0.660725592 | 5.573283   | -6.5732847   | 2.74E-10 | 1.09E-09 | 12.61073544 |
| FTSJ3    | -0.418933869 | 4.93877372 | -6.573129138 | 2.74E-10 | 1.09E-09 | 12.60986124 |
| THOP1    | -0.381693938 | 3.84020553 | -6.572979821 | 2.74E-10 | 1.09E-09 | 12.60902217 |
| NOLC1    | -0.526113625 | 5.81100871 | -6.571317237 | 2.77E-10 | 1.10E-09 | 12.59968023 |
| PRELID2  | -0.263903663 | 1.26998754 | -6.570035433 | 2.79E-10 | 1.11E-09 | 12.59247902 |
| PLCL1    | -0.532056582 | 1.69342642 | -6.569723779 | 2.80E-10 | 1.11E-09 | 12.59072829 |
| PHTF1    | -0.369976709 | 2.53005642 | -6.569374901 | 2.80E-10 | 1.11E-09 | 12.58876852 |
| TRADD    | -0.435110356 | 4.90218135 | -6.568808396 | 2.81E-10 | 1.12E-09 | 12.58558642 |
| SELENO   | -0.421510636 | 4.95838415 | -6.568559456 | 2.82E-10 | 1.12E-09 | 12.58418817 |
| ERG28    | -0.357494193 | 6.10122664 | -6.568471723 | 2.82E-10 | 1.12E-09 | 12.5836954  |
| CCDC77   | -0.349233677 | 2.73181733 | -6.568107867 | 2.82E-10 | 1.12E-09 | 12.58165177 |
| GTF3C5   | -0.381132919 | 5.26328248 | -6.565954561 | 2.86E-10 | 1.13E-09 | 12.56955921 |
| AP1S1    | -0.419476605 | 6.50401    | -6.565562433 | 2.86E-10 | 1.14E-09 | 12.56735739 |
| CXCL16   | 0.596041401  | 5.74502684 | 6.565270034  | 2.87E-10 | 1.14E-09 | 12.56571561 |
| FDPS     | -0.419018254 | 5.50570476 | -6.565095383 | 2.87E-10 | 1.14E-09 | 12.564735   |
| ACO2     | -0.720709615 | 6.01256809 | -6.563903669 | 2.89E-10 | 1.15E-09 | 12.55804439 |
| PARN     | -0.37477171  | 5.50849145 | -6.56343593  | 2.90E-10 | 1.15E-09 | 12.55541861 |
| WDR31    | -0.513137365 | 2.6703757  | -6.562458289 | 2.92E-10 | 1.16E-09 | 12.54993078 |

|          |              |            |              |          |          |             |
|----------|--------------|------------|--------------|----------|----------|-------------|
| KDM1B    | -0.598291269 | 4.67349414 | -6.561823852 | 2.93E-10 | 1.16E-09 | 12.54636979 |
| CCDC10   | -0.471947078 | 4.21628334 | -6.561644658 | 2.93E-10 | 1.16E-09 | 12.54536405 |
| LIPH     | 1.559327553  | 4.65813754 | 6.560376392  | 2.95E-10 | 1.17E-09 | 12.53824634 |
| LRRC59   | -0.453228723 | 5.85812477 | -6.559468967 | 2.97E-10 | 1.17E-09 | 12.53315433 |
| LGALS3   | 1.338577011  | 8.04049266 | 6.559359431  | 2.97E-10 | 1.17E-09 | 12.5325397  |
| MAOB     | -1.097028688 | 2.55544761 | -6.559052797 | 2.97E-10 | 1.18E-09 | 12.53081916 |
| LYRM1    | -0.334361272 | 4.85678432 | -6.558507322 | 2.98E-10 | 1.18E-09 | 12.52775861 |
| ITGB2    | 1.039432066  | 4.32221146 | 6.55801668   | 2.99E-10 | 1.18E-09 | 12.52500587 |
| H1FX     | -0.493118404 | 7.39828991 | -6.557903583 | 2.99E-10 | 1.18E-09 | 12.52437136 |
| USP49    | -0.495190266 | 1.69261305 | -6.552976715 | 3.08E-10 | 1.22E-09 | 12.49673771 |
| BOLA2-S  | -0.420593198 | 1.59259937 | -6.551965865 | 3.10E-10 | 1.22E-09 | 12.49106991 |
| SMARCE   | -0.357088439 | 4.32981174 | -6.551548577 | 3.10E-10 | 1.23E-09 | 12.48873037 |
| BUB1B-F  | -0.132219535 | 0.29156055 | -6.551187537 | 3.11E-10 | 1.23E-09 | 12.48670628 |
| C11orf94 | -0.393406794 | 0.82376066 | -6.549594556 | 3.14E-10 | 1.24E-09 | 12.47777651 |
| DYNC1LI  | -0.375686976 | 3.98730842 | -6.549577294 | 3.14E-10 | 1.24E-09 | 12.47767976 |
| ARPC4    | -0.366190268 | 6.76692695 | -6.549017839 | 3.15E-10 | 1.24E-09 | 12.474544   |
| ICMT     | -0.427909112 | 6.10045821 | -6.548925988 | 3.15E-10 | 1.24E-09 | 12.47402919 |
| C1QTNF   | -0.189271873 | 0.27410627 | -6.548787996 | 3.15E-10 | 1.24E-09 | 12.47325578 |
| UPP1     | 0.850757704  | 4.78068089 | 6.548665338  | 3.16E-10 | 1.25E-09 | 12.47256832 |
| RNASE1   | -0.635262478 | 6.74395337 | -6.547948827 | 3.17E-10 | 1.25E-09 | 12.46855269 |
| C4orf45  | -0.132652007 | 0.17215473 | -6.547834939 | 3.17E-10 | 1.25E-09 | 12.46791444 |
| TNK1     | -0.37091512  | 3.55612637 | -6.547406727 | 3.18E-10 | 1.25E-09 | 12.46551474 |
| HIST1H4  | -0.586578928 | 1.09456393 | -6.547183239 | 3.18E-10 | 1.25E-09 | 12.46426235 |
| C19orf33 | 1.55257921   | 6.17030734 | 6.546555726  | 3.19E-10 | 1.26E-09 | 12.46074605 |
| MAP1LC   | -0.575584086 | 1.2990351  | -6.543528173 | 3.25E-10 | 1.28E-09 | 12.44378439 |
| ERCC1    | -0.320456408 | 5.05323668 | -6.542543826 | 3.27E-10 | 1.29E-09 | 12.43827085 |
| DNAJC1   | -0.475414933 | 4.29247797 | -6.542500068 | 3.27E-10 | 1.29E-09 | 12.43802577 |
| C1orf158 | -0.261632339 | 0.17581769 | -6.542226799 | 3.27E-10 | 1.29E-09 | 12.43649525 |
| ADRA2B   | -0.437794743 | 1.00046193 | -6.541495371 | 3.29E-10 | 1.29E-09 | 12.43239889 |
| C9orf64  | -0.568405614 | 4.79204637 | -6.541375371 | 3.29E-10 | 1.30E-09 | 12.43172686 |
| PIGS     | -0.585368203 | 4.96271275 | -6.540345932 | 3.31E-10 | 1.30E-09 | 12.42596212 |
| CADPS2   | -0.589035147 | 3.92219462 | -6.540114619 | 3.31E-10 | 1.30E-09 | 12.42466688 |
| TMEM79   | 0.799417716  | 3.86611747 | 6.539927157  | 3.32E-10 | 1.30E-09 | 12.42361722 |
| RUNX1T   | -0.359436883 | 0.94030162 | -6.537774749 | 3.36E-10 | 1.32E-09 | 12.41156662 |
| ANK3     | -0.620523286 | 2.85866022 | -6.537629977 | 3.36E-10 | 1.32E-09 | 12.41075619 |
| SLC35A1  | -0.405008681 | 4.32316491 | -6.536858389 | 3.38E-10 | 1.33E-09 | 12.40643709 |
| IGSF6    | 0.782033288  | 2.71342593 | 6.536168638  | 3.39E-10 | 1.33E-09 | 12.40257639 |
| CSTF3    | -0.381981673 | 4.3636347  | -6.535829571 | 3.40E-10 | 1.33E-09 | 12.40067866 |
| TMEM86   | -0.333275557 | 2.82620921 | -6.535347127 | 3.41E-10 | 1.34E-09 | 12.39797858 |
| CCDC17   | -0.328022941 | 4.32169999 | -6.5346867   | 3.42E-10 | 1.34E-09 | 12.39428263 |



|         |              |            |              |          |          |             |
|---------|--------------|------------|--------------|----------|----------|-------------|
| GPX3    | -0.894864636 | 11.1330279 | -6.534483645 | 3.42E-10 | 1.34E-09 | 12.39314632 |
| PRRT4   | -1.042683076 | 0.94642928 | -6.533928184 | 3.43E-10 | 1.35E-09 | 12.39003805 |
| GNA15   | 0.767621016  | 2.23115908 | 6.531460328  | 3.48E-10 | 1.37E-09 | 12.37623065 |
| COG5    | -0.530954368 | 3.7260422  | -6.531258425 | 3.49E-10 | 1.37E-09 | 12.37510118 |
| IL22RA1 | -0.902744423 | 2.39741531 | -6.529983433 | 3.51E-10 | 1.38E-09 | 12.36796935 |
| RPAIN   | -0.339192507 | 3.43599534 | -6.529923798 | 3.51E-10 | 1.38E-09 | 12.3676358  |
| VEPH1   | -0.372531807 | 0.74141793 | -6.529374636 | 3.52E-10 | 1.38E-09 | 12.36456431 |
| GATC    | -0.323353797 | 4.09231997 | -6.52844939  | 3.54E-10 | 1.39E-09 | 12.35938979 |
| DLL4    | -0.773021899 | 3.79030219 | -6.527842488 | 3.56E-10 | 1.39E-09 | 12.35599592 |
| CERS4   | -0.544731424 | 6.4236575  | -6.526804709 | 3.58E-10 | 1.40E-09 | 12.35019306 |
| TCEA1   | -0.532200223 | 5.44056644 | -6.526190847 | 3.59E-10 | 1.41E-09 | 12.34676088 |
| CHST10  | -0.577446988 | 4.08895525 | -6.52601532  | 3.59E-10 | 1.41E-09 | 12.34577953 |
| HAP1    | -0.651325082 | 0.9315304  | -6.525660806 | 3.60E-10 | 1.41E-09 | 12.34379755 |
| AOC2    | -0.32187547  | 0.76334918 | -6.524298736 | 3.63E-10 | 1.42E-09 | 12.33618332 |
| HAPLN3  | 0.845635062  | 2.81885557 | 6.524293906  | 3.63E-10 | 1.42E-09 | 12.33615633 |
| USP46   | -0.508992978 | 3.02563088 | -6.522528399 | 3.67E-10 | 1.43E-09 | 12.32628851 |
| ADAM12  | 0.767201844  | 1.16442277 | 6.521555826  | 3.69E-10 | 1.44E-09 | 12.32085339 |
| SH3TC1  | -0.467190256 | 2.65730386 | -6.519890581 | 3.72E-10 | 1.46E-09 | 12.3115487  |
| HPS6    | -0.343338269 | 4.63533847 | -6.519823917 | 3.72E-10 | 1.46E-09 | 12.31117624 |
| DAXX    | -0.324856688 | 5.60294968 | -6.519376084 | 3.73E-10 | 1.46E-09 | 12.30867424 |
| MTPAP   | -0.339583781 | 3.06954028 | -6.51698633  | 3.78E-10 | 1.48E-09 | 12.29532502 |
| FAM234  | -0.37727213  | 4.65100231 | -6.516377385 | 3.80E-10 | 1.48E-09 | 12.29192399 |
| MYRIP   | -0.51105278  | 1.31447745 | -6.516373156 | 3.80E-10 | 1.48E-09 | 12.29190037 |
| MAP11   | -0.447097783 | 4.29092075 | -6.516359487 | 3.80E-10 | 1.48E-09 | 12.29182403 |
| GDF10   | -1.075913022 | 1.18754543 | -6.515688936 | 3.81E-10 | 1.49E-09 | 12.2880792  |
| ZNF17   | -0.361901177 | 2.47554294 | -6.51453636  | 3.84E-10 | 1.50E-09 | 12.28164305 |
| MMP12   | 0.943422339  | 1.09089989 | 6.513940127  | 3.85E-10 | 1.50E-09 | 12.27831391 |
| DTD1    | -0.400452379 | 5.40197596 | -6.513791643 | 3.85E-10 | 1.50E-09 | 12.27748487 |
| GDF15   | 1.401943856  | 6.31521389 | 6.513762436  | 3.85E-10 | 1.50E-09 | 12.2773218  |
| HRH1    | 0.828181822  | 2.58300931 | 6.510496992  | 3.93E-10 | 1.53E-09 | 12.25909304 |
| INO80E  | -0.398184938 | 4.45084762 | -6.510212033 | 3.93E-10 | 1.53E-09 | 12.25750261 |
| ECHDC2  | -0.496112257 | 4.86987189 | -6.509023789 | 3.96E-10 | 1.54E-09 | 12.25087128 |
| IPO11   | -0.427502536 | 3.27133283 | -6.509005178 | 3.96E-10 | 1.54E-09 | 12.25076743 |
| TRPC4   | -0.387972368 | 0.89581874 | -6.508558357 | 3.97E-10 | 1.55E-09 | 12.24827404 |
| HTATSF  | -0.484164435 | 6.34218431 | -6.50852922  | 3.97E-10 | 1.55E-09 | 12.24811146 |
| MS4A14  | 0.339488462  | 0.77747016 | 6.507377116  | 4.00E-10 | 1.56E-09 | 12.24168299 |
| NKAP    | -0.295817271 | 3.26627327 | -6.50726079  | 4.00E-10 | 1.56E-09 | 12.24103396 |
| DTX4    | 1.43811283   | 6.5546372  | 6.507164885  | 4.00E-10 | 1.56E-09 | 12.24049888 |
| RNF223  | 0.376970669  | 0.43332775 | 6.505799865  | 4.03E-10 | 1.57E-09 | 12.23288362 |
| MYH3    | -0.717139913 | 1.34951247 | -6.504615607 | 4.06E-10 | 1.58E-09 | 12.22627774 |

|         |              |            |              |          |          |             |
|---------|--------------|------------|--------------|----------|----------|-------------|
| TRIM4   | -0.534819549 | 4.84834293 | -6.504537365 | 4.06E-10 | 1.58E-09 | 12.22584133 |
| PMEL    | -0.338452305 | 1.47112513 | -6.50420606  | 4.07E-10 | 1.58E-09 | 12.22399346 |
| PDHX    | -0.368153368 | 4.08644899 | -6.503485085 | 4.09E-10 | 1.59E-09 | 12.2199724  |
| YEATS4  | -0.462914361 | 4.54238702 | -6.502032982 | 4.12E-10 | 1.60E-09 | 12.21187464 |
| NEU4    | -0.3232161   | 0.31069464 | -6.500624122 | 4.15E-10 | 1.61E-09 | 12.20401926 |
| PSMD1   | -0.421262439 | 5.58435525 | -6.500367083 | 4.16E-10 | 1.62E-09 | 12.20258622 |
| GTPBP4  | -0.378051256 | 4.09535068 | -6.500135821 | 4.17E-10 | 1.62E-09 | 12.20129692 |
| SRD5A3  | -0.463892264 | 3.32944224 | -6.499440143 | 4.18E-10 | 1.62E-09 | 12.19741869 |
| PIGO    | -0.52258754  | 4.14354462 | -6.499159813 | 4.19E-10 | 1.63E-09 | 12.195856   |
| BIVM    | -0.390954457 | 3.16937339 | -6.499076815 | 4.19E-10 | 1.63E-09 | 12.19539334 |
| NTMT1   | -0.379116278 | 4.05068501 | -6.498692103 | 4.20E-10 | 1.63E-09 | 12.19324888 |
| TCP10L  | -0.214914578 | 0.58807649 | -6.497202689 | 4.24E-10 | 1.64E-09 | 12.18494744 |
| TLN2    | -0.695592196 | 2.89588291 | -6.495275104 | 4.28E-10 | 1.66E-09 | 12.17420583 |
| MRPL46  | -0.353931276 | 2.8596226  | -6.495185953 | 4.28E-10 | 1.66E-09 | 12.17370909 |
| ST6GAL1 | -0.685989368 | 3.2978848  | -6.49467303  | 4.30E-10 | 1.67E-09 | 12.1708512  |
| RP9     | -0.345700367 | 4.03217973 | -6.493904505 | 4.32E-10 | 1.67E-09 | 12.16656945 |
| CWC25   | -0.365209999 | 4.20634496 | -6.493704868 | 4.32E-10 | 1.67E-09 | 12.16545726 |
| ADAMTS  | -0.450817689 | 1.29383815 | -6.493144551 | 4.33E-10 | 1.68E-09 | 12.16233582 |
| SOX3    | -0.830898478 | 0.57528144 | -6.490896684 | 4.39E-10 | 1.70E-09 | 12.14981524 |
| GJB3    | 1.41167036   | 3.44424566 | 6.488194213  | 4.46E-10 | 1.73E-09 | 12.13476663 |
| HEATR3  | -0.367746976 | 3.22507808 | -6.485426752 | 4.53E-10 | 1.75E-09 | 12.11936077 |
| MAP3K4  | -0.40753346  | 3.50445492 | -6.482751568 | 4.60E-10 | 1.78E-09 | 12.10447309 |
| ADCY8   | 1.181463731  | 1.40603544 | 6.479682578  | 4.68E-10 | 1.81E-09 | 12.08739924 |
| PRKD1   | -0.488376493 | 2.59485405 | -6.478517339 | 4.71E-10 | 1.82E-09 | 12.08091814 |
| RSL24D1 | -0.377424243 | 6.42695979 | -6.478468342 | 4.71E-10 | 1.82E-09 | 12.08064564 |
| HLA-DQβ | 1.389362495  | 4.64090987 | 6.477683037  | 4.73E-10 | 1.83E-09 | 12.07627824 |
| KANK3   | -0.57612402  | 3.48013115 | -6.477518452 | 4.74E-10 | 1.83E-09 | 12.07536296 |
| DOK7    | 1.082907525  | 2.56267524 | 6.477136202  | 4.75E-10 | 1.84E-09 | 12.07323729 |
| RNF144A | 0.676841833  | 3.34742435 | 6.476465774  | 4.77E-10 | 1.84E-09 | 12.06950929 |
| CMPK1   | -0.441599993 | 6.89715562 | -6.475257712 | 4.80E-10 | 1.85E-09 | 12.06279241 |
| KCNC4   | -0.328849643 | 1.1718265  | -6.472040465 | 4.89E-10 | 1.89E-09 | 12.04490876 |
| DEXI    | -0.452087562 | 3.9885552  | -6.471304706 | 4.91E-10 | 1.90E-09 | 12.04081981 |
| ST6GAL2 | -0.990321034 | 5.22380103 | -6.469437399 | 4.96E-10 | 1.92E-09 | 12.03044382 |
| NAP1L4  | -0.33824422  | 6.39202947 | -6.466877171 | 5.03E-10 | 1.94E-09 | 12.01622099 |
| MBOAT2  | 0.80298464   | 4.01506969 | 6.466581525  | 5.04E-10 | 1.95E-09 | 12.01457885 |
| NCALD   | -0.453101078 | 1.77658301 | -6.466195815 | 5.05E-10 | 1.95E-09 | 12.01243654 |
| C1GALT1 | -0.458185988 | 3.34834012 | -6.464170602 | 5.11E-10 | 1.97E-09 | 12.0011896  |
| RAP1A   | -0.374853677 | 5.55816357 | -6.463899763 | 5.12E-10 | 1.97E-09 | 11.9996857  |
| SLTM    | -0.459618274 | 5.07849293 | -6.463641884 | 5.13E-10 | 1.98E-09 | 11.9982538  |
| GSTA4   | -0.532008348 | 4.71260174 | -6.463358219 | 5.14E-10 | 1.98E-09 | 11.99667877 |

|         |              |            |              |          |          |             |
|---------|--------------|------------|--------------|----------|----------|-------------|
| PEX5    | -0.428032396 | 4.55630312 | -6.462048949 | 5.17E-10 | 1.99E-09 | 11.98940979 |
| CCDC15  | -0.431744019 | 1.61047944 | -6.46200348  | 5.18E-10 | 1.99E-09 | 11.98915737 |
| PPM1F   | -0.398273758 | 3.45562971 | -6.461926047 | 5.18E-10 | 1.99E-09 | 11.9887275  |
| CTU2    | -0.360798567 | 3.94277463 | -6.461404229 | 5.19E-10 | 2.00E-09 | 11.98583074 |
| TMEM12  | -0.378234734 | 2.43543904 | -6.460787414 | 5.21E-10 | 2.01E-09 | 11.98240683 |
| COG1    | -0.350287175 | 4.57412869 | -6.460398222 | 5.22E-10 | 2.01E-09 | 11.98024657 |
| CBX7    | -0.502415505 | 5.13880038 | -6.460369909 | 5.22E-10 | 2.01E-09 | 11.98008942 |
| TRAPPC  | -0.419903674 | 4.52514505 | -6.459212668 | 5.26E-10 | 2.02E-09 | 11.97366658 |
| TMEM21  | -0.40477018  | 4.38459817 | -6.458805401 | 5.27E-10 | 2.03E-09 | 11.97140639 |
| ARPC5   | -0.338437829 | 5.20035941 | -6.458563723 | 5.28E-10 | 2.03E-09 | 11.97006521 |
| MYCN    | -0.727274067 | 1.64521234 | -6.458212152 | 5.29E-10 | 2.03E-09 | 11.96811425 |
| SCUBE1  | -0.880452763 | 1.20491022 | -6.457461106 | 5.31E-10 | 2.04E-09 | 11.96394675 |
| MMP20   | 0.103307334  | 0.07423797 | 6.457181496  | 5.32E-10 | 2.04E-09 | 11.9623953  |
| LRRC57  | -0.378892237 | 3.19946886 | -6.45408729  | 5.41E-10 | 2.08E-09 | 11.94522999 |
| NCBP2   | -0.353108068 | 5.67945739 | -6.453063448 | 5.44E-10 | 2.09E-09 | 11.93955146 |
| CBLL1   | -0.438436063 | 3.94384882 | -6.452667038 | 5.46E-10 | 2.10E-09 | 11.93735302 |
| TFDP1   | -0.46794755  | 5.52464948 | -6.452628977 | 5.46E-10 | 2.10E-09 | 11.93714195 |
| ATP7B   | -0.425754414 | 1.25077317 | -6.450507617 | 5.52E-10 | 2.12E-09 | 11.92537889 |
| TGM1    | 0.843434178  | 2.0432199  | 6.450472557  | 5.53E-10 | 2.12E-09 | 11.92518451 |
| RPRM    | -0.692680552 | 1.36009973 | -6.450095597 | 5.54E-10 | 2.13E-09 | 11.92309454 |
| HLX     | -0.624006099 | 2.48054832 | -6.449279317 | 5.56E-10 | 2.13E-09 | 11.91856917 |
| RPUSD1  | -0.3421664   | 4.35242118 | -6.44878841  | 5.58E-10 | 2.14E-09 | 11.91584783 |
| MIGA2   | -0.37621855  | 4.15035246 | -6.447867328 | 5.61E-10 | 2.15E-09 | 11.91074223 |
| SLC2A11 | -0.436178987 | 3.06752175 | -6.444308464 | 5.72E-10 | 2.19E-09 | 11.8910202  |
| QARS    | -0.320538275 | 6.69455434 | -6.441677897 | 5.81E-10 | 2.23E-09 | 11.87644751 |
| CCDC81  | -0.214711298 | 0.59701643 | -6.440883971 | 5.83E-10 | 2.24E-09 | 11.8720502  |
| KIAA031 | -0.446067509 | 5.32953615 | -6.440238132 | 5.86E-10 | 2.24E-09 | 11.86847338 |
| ZC3H7A  | -0.470162266 | 4.44793212 | -6.439640372 | 5.88E-10 | 2.25E-09 | 11.86516307 |
| TXNRD1  | -0.632994822 | 4.48941029 | -6.438750213 | 5.91E-10 | 2.26E-09 | 11.86023391 |
| KIF7    | -0.522134226 | 2.78320972 | -6.437993266 | 5.93E-10 | 2.27E-09 | 11.85604278 |
| USP30   | -0.404295316 | 3.69629899 | -6.437938445 | 5.93E-10 | 2.27E-09 | 11.85573925 |
| PLAU    | 1.430414877  | 6.22768368 | 6.437785587  | 5.94E-10 | 2.27E-09 | 11.85489294 |
| SRP54   | -0.442732062 | 5.35964956 | -6.437629102 | 5.94E-10 | 2.27E-09 | 11.85402657 |
| RHOJ    | -0.538009229 | 3.24116972 | -6.437471948 | 5.95E-10 | 2.28E-09 | 11.8531565  |
| EIF6    | -0.365433311 | 7.44290256 | -6.436958498 | 5.97E-10 | 2.28E-09 | 11.85031395 |
| MVK     | -0.370767299 | 3.88055934 | -6.436777189 | 5.97E-10 | 2.28E-09 | 11.84931023 |
| WBP4    | -0.348773535 | 4.41903757 | -6.436419697 | 5.98E-10 | 2.29E-09 | 11.84733123 |
| VPS33B  | -0.315459232 | 3.74467348 | -6.435532038 | 6.01E-10 | 2.30E-09 | 11.84241768 |
| ACVR1B  | -0.476751538 | 4.31610651 | -6.434441236 | 6.05E-10 | 2.31E-09 | 11.83638032 |
| ZNF674  | -0.297539172 | 1.4429031  | -6.433262454 | 6.09E-10 | 2.33E-09 | 11.82985683 |

|          |              |            |              |          |          |             |
|----------|--------------|------------|--------------|----------|----------|-------------|
| SELENO   | -0.400485595 | 6.39572866 | -6.432800728 | 6.11E-10 | 2.33E-09 | 11.82730183 |
| CHRM1    | -0.08076905  | 0.08616273 | -6.432006379 | 6.14E-10 | 2.34E-09 | 11.82290655 |
| WDR41    | -0.361226144 | 4.24297074 | -6.430158192 | 6.20E-10 | 2.37E-09 | 11.81268169 |
| S100B    | 1.394820942  | 2.5618958  | 6.430043942  | 6.20E-10 | 2.37E-09 | 11.81204968 |
| ZBTB3    | -0.393816015 | 2.81345316 | -6.428813955 | 6.25E-10 | 2.38E-09 | 11.8052462  |
| SMAD7    | -0.604513576 | 5.12212817 | -6.427138163 | 6.31E-10 | 2.41E-09 | 11.79597832 |
| SLC25A3  | -0.516782323 | 1.49671461 | -6.426404213 | 6.33E-10 | 2.42E-09 | 11.7919198  |
| RIBC2    | -0.518958334 | 1.84927073 | -6.425393113 | 6.37E-10 | 2.43E-09 | 11.78632927 |
| PHLDA1   | -0.789268726 | 5.92718711 | -6.424783204 | 6.39E-10 | 2.44E-09 | 11.78295729 |
| C1orf116 | 1.239770034  | 4.38316259 | 6.424661871  | 6.40E-10 | 2.44E-09 | 11.78228651 |
| PMF1-BC  | -0.482808795 | 2.90074017 | -6.423797131 | 6.43E-10 | 2.45E-09 | 11.77750612 |
| EXD2     | -0.421035669 | 3.90465304 | -6.423509496 | 6.44E-10 | 2.45E-09 | 11.77591614 |
| TRIM24   | -0.447653404 | 3.50636558 | -6.422992655 | 6.46E-10 | 2.46E-09 | 11.7730593  |
| MYO10    | -0.608739801 | 4.29184439 | -6.422733834 | 6.47E-10 | 2.46E-09 | 11.77162872 |
| BCAS4    | 0.664432119  | 3.4357639  | 6.421271967  | 6.52E-10 | 2.48E-09 | 11.76354937 |
| MCUB     | 0.843348285  | 3.27104631 | 6.421193663  | 6.52E-10 | 2.48E-09 | 11.76311664 |
| P2RX3    | -0.171246549 | 0.15810601 | -6.420591646 | 6.55E-10 | 2.49E-09 | 11.75978986 |
| FATE1    | -0.52720663  | 1.01593588 | -6.419759619 | 6.58E-10 | 2.50E-09 | 11.75519241 |
| SAXO1    | -0.095823398 | 0.14424548 | -6.419672272 | 6.58E-10 | 2.50E-09 | 11.75470978 |
| TCP1     | -0.376944577 | 6.24336882 | -6.419304217 | 6.59E-10 | 2.51E-09 | 11.75267622 |
| UBE2E1   | -0.354959911 | 5.95065727 | -6.418864108 | 6.61E-10 | 2.51E-09 | 11.75024465 |
| FADS2    | -0.605274147 | 2.2804647  | -6.418402729 | 6.63E-10 | 2.52E-09 | 11.74769569 |
| DHX40    | -0.446661171 | 4.82140997 | -6.418213657 | 6.63E-10 | 2.52E-09 | 11.74665117 |
| DOLPP1   | -0.419090318 | 4.35507899 | -6.418132189 | 6.64E-10 | 2.52E-09 | 11.74620111 |
| C1GALT   | -0.443866579 | 5.61733404 | -6.417793621 | 6.65E-10 | 2.53E-09 | 11.74433079 |
| RNF13    | -0.502759212 | 5.96309459 | -6.416069363 | 6.71E-10 | 2.55E-09 | 11.73480669 |
| MEF2C    | -0.543301694 | 3.65025904 | -6.415478123 | 6.74E-10 | 2.56E-09 | 11.73154135 |
| ALDH18A  | -0.430595319 | 6.35969257 | -6.415464965 | 6.74E-10 | 2.56E-09 | 11.73146868 |
| CCDC16   | -0.215147223 | 0.28621647 | -6.415168344 | 6.75E-10 | 2.56E-09 | 11.72983057 |
| INTS12   | -0.383567089 | 4.20093775 | -6.414346279 | 6.78E-10 | 2.57E-09 | 11.72529093 |
| MED25    | -0.402105782 | 5.09545919 | -6.414300522 | 6.78E-10 | 2.57E-09 | 11.72503826 |
| EPAS1    | -0.685643677 | 6.88862563 | -6.412065488 | 6.87E-10 | 2.61E-09 | 11.71269805 |
| IRF5     | 0.559604296  | 3.16791532 | 6.411104367  | 6.91E-10 | 2.62E-09 | 11.70739241 |
| SHANK3   | -0.639897075 | 4.10274152 | -6.410438509 | 6.93E-10 | 2.63E-09 | 11.70371703 |
| PCDHAC   | 0.678724231  | 1.24939877 | 6.409904209  | 6.95E-10 | 2.64E-09 | 11.70076802 |
| FXR2     | -0.361284832 | 5.1077159  | -6.408676891 | 7.00E-10 | 2.65E-09 | 11.69399465 |
| PSME3    | -0.409781251 | 5.53201453 | -6.408114836 | 7.02E-10 | 2.66E-09 | 11.69089307 |
| ATP6AP   | -0.374999711 | 7.35593441 | -6.406757682 | 7.08E-10 | 2.68E-09 | 11.68340472 |
| SUGP1    | -0.343104403 | 4.27623954 | -6.40593545  | 7.11E-10 | 2.69E-09 | 11.67886846 |
| NUTM2B   | -0.107483381 | 0.20691832 | -6.40391377  | 7.19E-10 | 2.72E-09 | 11.66771662 |

|         |              |            |              |          |          |             |
|---------|--------------|------------|--------------|----------|----------|-------------|
| MTMR10  | -0.429210148 | 3.91683225 | -6.403079417 | 7.23E-10 | 2.74E-09 | 11.66311497 |
| SLC5A5  | -1.414234482 | 1.26707717 | -6.402595815 | 7.25E-10 | 2.74E-09 | 11.66044799 |
| URGCP   | -0.327015534 | 4.27493277 | -6.398654403 | 7.41E-10 | 2.80E-09 | 11.63871722 |
| DYM     | -0.399193834 | 4.68280233 | -6.398208103 | 7.43E-10 | 2.81E-09 | 11.63625718 |
| PLA2G12 | -0.423333006 | 4.79122033 | -6.396290593 | 7.51E-10 | 2.84E-09 | 11.62568912 |
| G6PD    | -0.521330006 | 6.1853256  | -6.395734473 | 7.53E-10 | 2.85E-09 | 11.62262458 |
| FOLR3   | -0.535379478 | 0.67653162 | -6.394799691 | 7.57E-10 | 2.86E-09 | 11.61747383 |
| ACSS2   | -0.299320858 | 4.1149706  | -6.394024013 | 7.61E-10 | 2.87E-09 | 11.61320018 |
| CHPF    | -0.494547032 | 7.16848305 | -6.393979177 | 7.61E-10 | 2.87E-09 | 11.61295316 |
| TUT1    | -0.386071601 | 3.81329701 | -6.393740326 | 7.62E-10 | 2.88E-09 | 11.61163727 |
| NLGN2   | 0.558657465  | 3.41100811 | 6.393318913  | 7.64E-10 | 2.88E-09 | 11.6093157  |
| SUV39H1 | -0.378322359 | 2.44113917 | -6.392398009 | 7.68E-10 | 2.90E-09 | 11.6042428  |
| SRR     | -0.351226376 | 3.01335167 | -6.3920416   | 7.69E-10 | 2.90E-09 | 11.60227962 |
| MCFD2   | -0.612178135 | 6.41061594 | -6.388453569 | 7.85E-10 | 2.96E-09 | 11.58252041 |
| OSBPL6  | -0.463168695 | 0.7902671  | -6.386081233 | 7.95E-10 | 3.00E-09 | 11.56946042 |
| TNFSF14 | 0.415054437  | 0.69912067 | 6.385590199  | 7.98E-10 | 3.01E-09 | 11.56675766 |
| DTWD2   | -0.568243874 | 2.87273975 | -6.385290096 | 7.99E-10 | 3.01E-09 | 11.56510589 |
| DBH     | -0.546197629 | 1.08402469 | -6.384573417 | 8.02E-10 | 3.03E-09 | 11.56116153 |
| AIP     | -0.357211872 | 7.39671696 | -6.384388399 | 8.03E-10 | 3.03E-09 | 11.56014331 |
| WDR89   | -0.368466631 | 4.11902498 | -6.38416193  | 8.04E-10 | 3.03E-09 | 11.55889699 |
| PREP    | -0.371380474 | 4.79504261 | -6.383521971 | 8.07E-10 | 3.04E-09 | 11.55537531 |
| SPOUT1  | -0.355902212 | 4.44495816 | -6.383206186 | 8.08E-10 | 3.05E-09 | 11.55363765 |
| MAZ     | -0.535295147 | 4.9395788  | -6.381146357 | 8.18E-10 | 3.08E-09 | 11.54230459 |
| TRAF6   | -0.432261928 | 2.93371311 | -6.380392385 | 8.21E-10 | 3.09E-09 | 11.53815694 |
| PIFO    | -0.43958033  | 4.02140359 | -6.379329351 | 8.26E-10 | 3.11E-09 | 11.53230972 |
| WDR13   | -0.339025014 | 5.39578046 | -6.378158629 | 8.32E-10 | 3.13E-09 | 11.52587099 |
| GLYCTK  | -0.362855614 | 2.4546594  | -6.377873464 | 8.33E-10 | 3.14E-09 | 11.52430276 |
| GP5     | -0.258197057 | 0.36043512 | -6.377199854 | 8.36E-10 | 3.15E-09 | 11.52059856 |
| RNF187  | -0.53498932  | 7.57966321 | -6.377131831 | 8.36E-10 | 3.15E-09 | 11.52022451 |
| GAS2L1  | -0.355137396 | 3.85827438 | -6.3770923   | 8.37E-10 | 3.15E-09 | 11.52000714 |
| FRA10A  | -0.367529819 | 3.54416607 | -6.375977489 | 8.42E-10 | 3.17E-09 | 11.51387744 |
| GOLGA8  | -0.121877496 | 0.15361709 | -6.37548597  | 8.44E-10 | 3.17E-09 | 11.51117511 |
| HIST1H3 | -0.350392638 | 0.66424405 | -6.375190799 | 8.46E-10 | 3.18E-09 | 11.50955236 |
| GTF2H2  | -0.365840486 | 0.94147882 | -6.375151876 | 8.46E-10 | 3.18E-09 | 11.50933838 |
| TERF2   | -0.368849646 | 4.32355566 | -6.374931606 | 8.47E-10 | 3.18E-09 | 11.50812744 |
| RNF170  | -0.47040613  | 4.61571663 | -6.373921217 | 8.52E-10 | 3.20E-09 | 11.50257324 |
| NCF2    | 0.874740142  | 3.04567672 | 6.372058134  | 8.61E-10 | 3.23E-09 | 11.49233336 |
| TBC1D11 | -0.459068643 | 5.46232578 | -6.368399386 | 8.79E-10 | 3.30E-09 | 11.47223046 |
| OSTF1   | -0.378576717 | 6.68307061 | -6.367408908 | 8.84E-10 | 3.32E-09 | 11.46678974 |
| SLC5A6  | -0.352554221 | 3.25387513 | -6.365540096 | 8.93E-10 | 3.35E-09 | 11.45652599 |

|         |              |            |              |          |          |             |
|---------|--------------|------------|--------------|----------|----------|-------------|
| TMEM23  | -0.776009219 | 3.74012737 | -6.365280103 | 8.94E-10 | 3.36E-09 | 11.45509825 |
| TFPT    | -0.419526306 | 5.3823152  | -6.365236205 | 8.94E-10 | 3.36E-09 | 11.45485719 |
| ENPEP   | -0.70233517  | 2.25306801 | -6.362551734 | 9.08E-10 | 3.41E-09 | 11.44011807 |
| PLLP    | -0.392328189 | 2.65288659 | -6.360269334 | 9.20E-10 | 3.45E-09 | 11.42759008 |
| VPS9D1  | -0.344919649 | 4.38446335 | -6.359991727 | 9.21E-10 | 3.45E-09 | 11.42606653 |
| SH3BP2  | 0.497147296  | 3.23087039 | 6.359489559  | 9.24E-10 | 3.46E-09 | 11.42331068 |
| CHRNA1  | -0.488538416 | 4.33029678 | -6.35936999  | 9.24E-10 | 3.46E-09 | 11.42265452 |
| TMEM24  | -0.369583615 | 6.6307311  | -6.358908014 | 9.27E-10 | 3.47E-09 | 11.42011941 |
| SH2B1   | -0.405854547 | 5.15103022 | -6.358607032 | 9.28E-10 | 3.48E-09 | 11.41846784 |
| ACTR1A  | -0.277454172 | 6.33450943 | -6.358565938 | 9.29E-10 | 3.48E-09 | 11.41824234 |
| ERICH2  | -0.777547431 | 2.24414119 | -6.358367878 | 9.30E-10 | 3.48E-09 | 11.41715556 |
| CUX2    | -1.133373658 | 0.95726783 | -6.357306791 | 9.35E-10 | 3.50E-09 | 11.41133369 |
| CCDC91  | -0.411436244 | 3.87115479 | -6.356920456 | 9.37E-10 | 3.51E-09 | 11.40921415 |
| WDR5    | -0.365123133 | 4.86501206 | -6.35677634  | 9.38E-10 | 3.51E-09 | 11.40842351 |
| ANKRD2  | -0.468371608 | 1.62280302 | -6.353449835 | 9.56E-10 | 3.58E-09 | 11.39017761 |
| PREX2   | -0.638653713 | 1.92722852 | -6.353257617 | 9.57E-10 | 3.58E-09 | 11.3891235  |
| MBD2    | -0.408826074 | 5.75290905 | -6.353021089 | 9.58E-10 | 3.58E-09 | 11.38782644 |
| WWTR1   | -0.504316784 | 4.60800041 | -6.352476927 | 9.61E-10 | 3.59E-09 | 11.38484251 |
| RPL11   | -0.381986124 | 10.2316019 | -6.352140226 | 9.63E-10 | 3.60E-09 | 11.38299629 |
| NMU     | 1.852716515  | 3.5462007  | 6.350603924  | 9.71E-10 | 3.63E-09 | 11.37457326 |
| MPP6    | -0.494214025 | 2.07360473 | -6.349073658 | 9.79E-10 | 3.66E-09 | 11.3661848  |
| ETV7    | 0.871510288  | 2.36229176 | 6.348861073  | 9.81E-10 | 3.66E-09 | 11.36501959 |
| NRDE2   | -0.314272934 | 2.17431595 | -6.348689476 | 9.82E-10 | 3.67E-09 | 11.36407906 |
| OLFM3   | -0.281908229 | 0.19045935 | -6.348026134 | 9.85E-10 | 3.68E-09 | 11.36044344 |
| TANGO6  | -0.389953604 | 2.62456067 | -6.348004492 | 9.85E-10 | 3.68E-09 | 11.36032482 |
| SOX17   | -0.630346582 | 2.54679317 | -6.347737093 | 9.87E-10 | 3.68E-09 | 11.35885936 |
| FAM178B | 0.699882619  | 1.27338663 | 6.347605305  | 9.88E-10 | 3.68E-09 | 11.35813711 |
| ZNF837  | -0.487556489 | 2.92283248 | -6.345828867 | 9.97E-10 | 3.72E-09 | 11.34840269 |
| RAB40C  | -0.372646387 | 4.18372416 | -6.345367071 | 1.00E-09 | 3.73E-09 | 11.34587249 |
| CLEC5A  | 0.675007062  | 1.73432978 | 6.345167132  | 1.00E-09 | 3.73E-09 | 11.34477706 |
| NOXREC  | -0.323085526 | 1.02070273 | -6.343740047 | 1.01E-09 | 3.76E-09 | 11.33695903 |
| GDAP1   | -0.4492603   | 3.41404244 | -6.342256756 | 1.02E-09 | 3.79E-09 | 11.32883444 |
| SCNN1A  | 1.338894876  | 5.8728292  | 6.341856803  | 1.02E-09 | 3.80E-09 | 11.32664397 |
| KCNJ11  | -0.730243829 | 3.48315866 | -6.341204799 | 1.02E-09 | 3.81E-09 | 11.32307328 |
| ABHD17  | -0.376281489 | 4.01901797 | -6.340987727 | 1.02E-09 | 3.82E-09 | 11.32188455 |
| ZNF696  | -0.368236033 | 2.54267117 | -6.34090333  | 1.03E-09 | 3.82E-09 | 11.32142238 |
| CD109   | 0.964710506  | 2.51064876 | 6.340720688  | 1.03E-09 | 3.82E-09 | 11.32042223 |
| MAPK14  | -0.481606782 | 5.17350156 | -6.340399769 | 1.03E-09 | 3.83E-09 | 11.31866492 |
| GRB7    | 0.877908159  | 4.51716106 | 6.340307242  | 1.03E-09 | 3.83E-09 | 11.31815826 |
| WNT11   | -0.806444575 | 1.34745191 | -6.33957324  | 1.03E-09 | 3.84E-09 | 11.31413924 |

|          |              |            |              |          |          |             |
|----------|--------------|------------|--------------|----------|----------|-------------|
| IL17RD   | 0.740890036  | 1.99775651 | 6.338201047  | 1.04E-09 | 3.87E-09 | 11.30662673 |
| GATD1    | -0.351736094 | 5.30605546 | -6.338046274 | 1.04E-09 | 3.87E-09 | 11.30577944 |
| R3HDM1   | -0.368999075 | 3.31651502 | -6.337678208 | 1.04E-09 | 3.88E-09 | 11.30376459 |
| GTF3A    | -0.29955665  | 5.89138513 | -6.337517123 | 1.05E-09 | 3.88E-09 | 11.3028828  |
| TMEM63   | -0.582467402 | 1.25610237 | -6.336413619 | 1.05E-09 | 3.91E-09 | 11.29684265 |
| MLF1     | -0.494922476 | 3.27597387 | -6.334326828 | 1.06E-09 | 3.95E-09 | 11.28542245 |
| ZNF782   | -0.3664972   | 1.86636943 | -6.334279689 | 1.06E-09 | 3.95E-09 | 11.28516451 |
| NDUFAF   | -0.332837678 | 3.31596617 | -6.334198555 | 1.06E-09 | 3.95E-09 | 11.28472055 |
| TIMP3    | -0.92305278  | 2.77914453 | -6.333910443 | 1.07E-09 | 3.96E-09 | 11.28314406 |
| CCN4     | 0.642837565  | 0.89916861 | 6.331984547  | 1.08E-09 | 4.00E-09 | 11.27260731 |
| PSMD11   | -0.326202006 | 4.80801903 | -6.33163265  | 1.08E-09 | 4.01E-09 | 11.2706823  |
| UBLCP1   | -0.411064909 | 4.87287401 | -6.330219253 | 1.09E-09 | 4.04E-09 | 11.26295128 |
| FBF1     | -0.682187573 | 3.04246135 | -6.330105875 | 1.09E-09 | 4.04E-09 | 11.26233117 |
| RNF25    | -0.349433266 | 5.09966545 | -6.329674971 | 1.09E-09 | 4.05E-09 | 11.25997448 |
| CPPED1   | -0.406087459 | 3.54988613 | -6.328766858 | 1.10E-09 | 4.07E-09 | 11.25500825 |
| C1orf194 | -0.399241059 | 0.40307515 | -6.328492132 | 1.10E-09 | 4.08E-09 | 11.25350595 |
| POP7     | -0.330944275 | 5.90486152 | -6.326703999 | 1.11E-09 | 4.12E-09 | 11.24372892 |
| POLR2H   | -0.380066401 | 5.26209186 | -6.326266864 | 1.11E-09 | 4.12E-09 | 11.2413391  |
| LY6G6C   | 1.102887092  | 1.7697389  | 6.326176366  | 1.11E-09 | 4.13E-09 | 11.24084436 |
| CHRNA4   | -0.523859685 | 0.48799377 | -6.324453315 | 1.12E-09 | 4.17E-09 | 11.23142566 |
| CNRIP1   | -0.441328626 | 2.43775621 | -6.323932705 | 1.13E-09 | 4.18E-09 | 11.22858023 |
| RWDD3    | -0.40180527  | 3.33308083 | -6.321679423 | 1.14E-09 | 4.23E-09 | 11.2162667  |
| MPP2     | -0.757564832 | 2.63103688 | -6.321498188 | 1.14E-09 | 4.23E-09 | 11.21527645 |
| DHDH     | 0.788297295  | 1.89288937 | 6.320991343  | 1.15E-09 | 4.24E-09 | 11.21250719 |
| AARSD1   | -0.316866507 | 2.23146122 | -6.320652835 | 1.15E-09 | 4.25E-09 | 11.21065776 |
| GLIS3    | -0.639573736 | 3.67978839 | -6.31974321  | 1.15E-09 | 4.27E-09 | 11.20568842 |
| PGA5     | -0.345982828 | 0.34348522 | -6.319398548 | 1.16E-09 | 4.28E-09 | 11.20380565 |
| CPOX     | -0.434970429 | 3.50008309 | -6.319219204 | 1.16E-09 | 4.28E-09 | 11.20282598 |
| CNST     | -0.50265234  | 3.97860421 | -6.318925471 | 1.16E-09 | 4.29E-09 | 11.2012215  |
| CTNNBL   | -0.347729948 | 4.83228121 | -6.318783965 | 1.16E-09 | 4.29E-09 | 11.20044857 |
| TNPO3    | -0.412676747 | 5.41916655 | -6.318644902 | 1.16E-09 | 4.29E-09 | 11.19968899 |
| SMARCC1  | -0.432667373 | 4.97928379 | -6.317686376 | 1.17E-09 | 4.31E-09 | 11.19445373 |
| CCDC8    | -0.917831553 | 5.07691019 | -6.31547558  | 1.18E-09 | 4.37E-09 | 11.18238105 |
| ADD3     | -0.637065446 | 5.65648817 | -6.31424385  | 1.19E-09 | 4.40E-09 | 11.17565617 |
| HMGN1    | -0.414913225 | 6.61439931 | -6.313908217 | 1.19E-09 | 4.40E-09 | 11.17382388 |
| NFKBIL1  | -0.38942079  | 5.713707   | -6.31384584  | 1.19E-09 | 4.40E-09 | 11.17348336 |
| SH2B2    | -0.486689839 | 3.27875401 | -6.31305138  | 1.20E-09 | 4.42E-09 | 11.16914655 |
| PHGDH    | -0.80104909  | 5.1352555  | -6.312363527 | 1.20E-09 | 4.44E-09 | 11.16539202 |
| GPNMB    | 1.347763423  | 4.83564379 | 6.311657208  | 1.21E-09 | 4.46E-09 | 11.161537   |
| RHOT1    | -0.423382963 | 4.57890273 | -6.310451187 | 1.22E-09 | 4.49E-09 | 11.15495538 |

|          |              |            |              |          |          |             |
|----------|--------------|------------|--------------|----------|----------|-------------|
| C11orf80 | 0.579740536  | 3.60811933 | 6.309805111  | 1.22E-09 | 4.50E-09 | 11.15142993 |
| ASNSD1   | -0.367066636 | 5.55516636 | -6.308803997 | 1.23E-09 | 4.52E-09 | 11.14596766 |
| PIGC     | -0.293415744 | 4.11386555 | -6.306111171 | 1.25E-09 | 4.59E-09 | 11.13127821 |
| UBE2J2   | -0.325134143 | 4.8435715  | -6.306095392 | 1.25E-09 | 4.59E-09 | 11.13119215 |
| TRMT2B   | -0.399661531 | 3.8099651  | -6.303757459 | 1.26E-09 | 4.65E-09 | 11.11844239 |
| POU2F3   | 0.679599761  | 2.25466839 | 6.303699298  | 1.26E-09 | 4.65E-09 | 11.11812526 |
| ACTR3B   | -0.281477828 | 2.08651109 | -6.301910277 | 1.28E-09 | 4.70E-09 | 11.10837136 |
| LAMB4    | -0.187946246 | 0.20177595 | -6.301499594 | 1.28E-09 | 4.71E-09 | 11.10613256 |
| H3F3A    | -0.422689908 | 4.80543854 | -6.300942853 | 1.28E-09 | 4.72E-09 | 11.10309772 |
| DRAM2    | -0.311332821 | 5.15410842 | -6.300412627 | 1.29E-09 | 4.73E-09 | 11.10020759 |
| PLEKHA   | -0.415379539 | 2.53143931 | -6.299789919 | 1.29E-09 | 4.75E-09 | 11.09681359 |
| TDRD9    | -1.107804386 | 2.16173266 | -6.299299574 | 1.29E-09 | 4.76E-09 | 11.0941412  |
| ARHGAP   | -0.433900162 | 3.3833227  | -6.298902806 | 1.30E-09 | 4.77E-09 | 11.09197891 |
| ADRB1    | -0.365575645 | 0.68112164 | -6.296364032 | 1.32E-09 | 4.84E-09 | 11.07814558 |
| ZNF391   | -0.445778295 | 2.28635219 | -6.295711827 | 1.32E-09 | 4.85E-09 | 11.07459249 |
| C14orf93 | -0.350863128 | 3.52185104 | -6.29544312  | 1.32E-09 | 4.86E-09 | 11.0731287  |
| TIE1     | -0.586675976 | 4.13042362 | -6.294988867 | 1.33E-09 | 4.87E-09 | 11.07065425 |
| SYCE3    | -0.655627763 | 2.5498014  | -6.29424071  | 1.33E-09 | 4.89E-09 | 11.06657911 |
| ZNF512E  | -0.477770387 | 4.45275134 | -6.293156541 | 1.34E-09 | 4.92E-09 | 11.06067436 |
| ZNF555   | -0.321341005 | 1.64759048 | -6.292896431 | 1.34E-09 | 4.93E-09 | 11.05925783 |
| RBM28    | -0.300625445 | 2.49434312 | -6.291484084 | 1.35E-09 | 4.96E-09 | 11.05156706 |
| GRAP     | -0.400099575 | 1.04501156 | -6.291228766 | 1.35E-09 | 4.97E-09 | 11.05017689 |
| HESX1    | -0.353119536 | 1.45299568 | -6.291226543 | 1.35E-09 | 4.97E-09 | 11.05016479 |
| VILL     | -0.573408869 | 2.67135297 | -6.290997032 | 1.36E-09 | 4.97E-09 | 11.04891516 |
| CDK5RA   | -0.441112103 | 5.91395738 | -6.288582381 | 1.37E-09 | 5.04E-09 | 11.03577014 |
| CLDN16   | 1.788613581  | 4.94223662 | 6.288441913  | 1.38E-09 | 5.04E-09 | 11.03500557 |
| CTDP1    | -0.314741966 | 3.55377844 | -6.288428238 | 1.38E-09 | 5.04E-09 | 11.03493113 |
| DNAJB4   | -0.594225075 | 4.72403607 | -6.288340107 | 1.38E-09 | 5.04E-09 | 11.03445144 |
| MAPT     | -0.531770228 | 0.69889236 | -6.287641203 | 1.38E-09 | 5.06E-09 | 11.0306475  |
| PUF60    | -0.422598383 | 6.22414537 | -6.287609002 | 1.38E-09 | 5.06E-09 | 11.03047224 |
| CPO      | -0.367649381 | 1.18573058 | -6.285868875 | 1.40E-09 | 5.11E-09 | 11.0210026  |
| TADA3    | -0.376119911 | 6.52247116 | -6.285834562 | 1.40E-09 | 5.11E-09 | 11.02081589 |
| MYBPH    | 0.874533314  | 1.34901194 | 6.28459517   | 1.41E-09 | 5.14E-09 | 11.0140724  |
| SPTBN4   | -0.401306866 | 0.98455249 | -6.284555029 | 1.41E-09 | 5.14E-09 | 11.01385401 |
| 11-Mar   | 0.460534448  | 0.46920832 | 6.283729757  | 1.41E-09 | 5.17E-09 | 11.00936429 |
| PANK4    | -0.359773749 | 3.99944429 | -6.283568331 | 1.41E-09 | 5.17E-09 | 11.00848614 |
| FOXF1    | -0.597534974 | 1.8060779  | -6.283471638 | 1.41E-09 | 5.17E-09 | 11.00796014 |
| PEX14    | -0.312254766 | 4.85657696 | -6.283123145 | 1.42E-09 | 5.18E-09 | 11.00606442 |
| ZNF354A  | -0.32462055  | 3.56733228 | -6.282481035 | 1.42E-09 | 5.20E-09 | 11.00257171 |
| THUMPC   | -0.358112783 | 3.03525948 | -6.282381633 | 1.42E-09 | 5.20E-09 | 11.00203104 |



|          |              |            |              |          |          |             |
|----------|--------------|------------|--------------|----------|----------|-------------|
| DNAJC2   | -0.550904025 | 4.39574786 | -6.281245557 | 1.43E-09 | 5.23E-09 | 10.99585214 |
| KDM4D    | -0.255964155 | 1.18881589 | -6.281238315 | 1.43E-09 | 5.23E-09 | 10.99581275 |
| GOLPH3   | -0.427677454 | 5.28545683 | -6.280953762 | 1.43E-09 | 5.24E-09 | 10.99426525 |
| SSRP1    | -0.439108944 | 6.13102961 | -6.280810762 | 1.43E-09 | 5.24E-09 | 10.99348759 |
| SYT3     | -0.453482836 | 0.51046262 | -6.280225875 | 1.44E-09 | 5.26E-09 | 10.99030698 |
| PLEKHG   | -0.776882474 | 1.2013912  | -6.279812933 | 1.44E-09 | 5.27E-09 | 10.98806153 |
| GFER     | -0.351282549 | 4.60013253 | -6.279304344 | 1.45E-09 | 5.28E-09 | 10.98529614 |
| EHD4     | -0.440390689 | 5.14263072 | -6.279275487 | 1.45E-09 | 5.28E-09 | 10.98513924 |
| PWWP2I   | -0.441010252 | 5.33228462 | -6.278803884 | 1.45E-09 | 5.30E-09 | 10.98257511 |
| ANAPC2   | -0.371359209 | 4.40597217 | -6.277340102 | 1.46E-09 | 5.34E-09 | 10.97461735 |
| GPX8     | -0.48805543  | 4.87417633 | -6.277328398 | 1.46E-09 | 5.34E-09 | 10.97455372 |
| PGAP3    | -0.458956459 | 6.41748481 | -6.277020277 | 1.47E-09 | 5.34E-09 | 10.97287882 |
| AKR1C1   | -0.773640764 | 1.02849854 | -6.276530807 | 1.47E-09 | 5.36E-09 | 10.97021824 |
| TOR1B    | -0.390991068 | 4.57674473 | -6.276530419 | 1.47E-09 | 5.36E-09 | 10.97021614 |
| C1orf109 | -0.428521121 | 3.23857195 | -6.275531795 | 1.48E-09 | 5.39E-09 | 10.96478847 |
| C9orf152 | -0.358099603 | 0.34916908 | -6.275108016 | 1.48E-09 | 5.40E-09 | 10.96248536 |
| JKAMP    | -0.448869604 | 4.7117478  | -6.274424703 | 1.49E-09 | 5.42E-09 | 10.958772   |
| EIF2B4   | -0.313967832 | 4.56678218 | -6.273740903 | 1.49E-09 | 5.44E-09 | 10.9550563  |
| VWF      | -0.887048788 | 5.89286521 | -6.273726621 | 1.49E-09 | 5.44E-09 | 10.95497869 |
| SHMT1    | -0.471473067 | 5.01737491 | -6.270605379 | 1.52E-09 | 5.53E-09 | 10.93802194 |
| NAT1     | -0.502345453 | 1.7454542  | -6.270451223 | 1.52E-09 | 5.53E-09 | 10.93718462 |
| EFCAB1   | -0.307989065 | 2.15489167 | -6.269971052 | 1.52E-09 | 5.55E-09 | 10.93457659 |
| VEGFC    | -0.518427946 | 6.04551779 | -6.269715303 | 1.53E-09 | 5.55E-09 | 10.93318756 |
| TMEM17   | -0.395215255 | 1.88061668 | -6.269020626 | 1.53E-09 | 5.57E-09 | 10.92941483 |
| RIC8A    | -0.34498366  | 5.43301807 | -6.268461934 | 1.54E-09 | 5.59E-09 | 10.92638084 |
| HIST1H2  | -0.76886557  | 5.46524443 | -6.268037547 | 1.54E-09 | 5.60E-09 | 10.92407633 |
| SLC1A2   | -0.270236565 | 0.29839639 | -6.267847607 | 1.54E-09 | 5.61E-09 | 10.92304496 |
| CREB3L   | -0.461642749 | 4.10117071 | -6.267504413 | 1.55E-09 | 5.62E-09 | 10.92118147 |
| DRAP1    | -0.456851648 | 8.12139042 | -6.267004388 | 1.55E-09 | 5.63E-09 | 10.91846654 |
| NPTXR    | 0.72720995   | 4.54422935 | 6.265966299  | 1.56E-09 | 5.66E-09 | 10.91283067 |
| TENM2    | -0.46836373  | 0.43722967 | -6.264972397 | 1.57E-09 | 5.69E-09 | 10.90743533 |
| DAND5    | -0.374293437 | 0.49157321 | -6.263743394 | 1.58E-09 | 5.73E-09 | 10.90076462 |
| PTGES3   | -0.4304333   | 7.72949084 | -6.259884666 | 1.61E-09 | 5.85E-09 | 10.8798267  |
| MED6     | -0.340606566 | 3.76432891 | -6.259831136 | 1.61E-09 | 5.85E-09 | 10.8795363  |
| DEAF1    | -0.424590681 | 5.39737411 | -6.259493877 | 1.62E-09 | 5.86E-09 | 10.87770676 |
| CIR1     | -0.34428783  | 5.69205522 | -6.259445144 | 1.62E-09 | 5.86E-09 | 10.8774424  |
| WDR34    | -0.433816886 | 6.9698318  | -6.259321017 | 1.62E-09 | 5.87E-09 | 10.87676906 |
| RIMKLB   | -0.461246257 | 3.68750335 | -6.259022594 | 1.62E-09 | 5.87E-09 | 10.87515029 |
| PLPP3    | -0.879878037 | 8.68364966 | -6.258914441 | 1.62E-09 | 5.88E-09 | 10.87456363 |
| CENPBD   | -0.49431358  | 2.77066725 | -6.258092975 | 1.63E-09 | 5.90E-09 | 10.87010799 |

|         |              |            |              |          |          |             |
|---------|--------------|------------|--------------|----------|----------|-------------|
| SSR1    | -0.398496195 | 5.33058041 | -6.256811109 | 1.64E-09 | 5.94E-09 | 10.86315598 |
| ELOF1   | -0.321268334 | 5.37088774 | -6.25679367  | 1.64E-09 | 5.94E-09 | 10.86306141 |
| PNPO    | -0.568926714 | 5.02181647 | -6.255248901 | 1.65E-09 | 5.99E-09 | 10.854685   |
| TRIM5   | -0.465581997 | 4.21305274 | -6.254106664 | 1.66E-09 | 6.03E-09 | 10.84849226 |
| CSGALN  | -0.846170701 | 4.64910304 | -6.253648504 | 1.67E-09 | 6.04E-09 | 10.84600855 |
| RHOT2   | -0.406825917 | 5.29074909 | -6.252950449 | 1.68E-09 | 6.07E-09 | 10.84222459 |
| ZNF773  | -0.293982187 | 1.95851765 | -6.252318738 | 1.68E-09 | 6.09E-09 | 10.83880054 |
| CFAP47  | -0.181529567 | 0.13586471 | -6.251741125 | 1.69E-09 | 6.10E-09 | 10.83566994 |
| SRRT    | -0.372287813 | 5.88711556 | -6.25138225  | 1.69E-09 | 6.12E-09 | 10.83372498 |
| FOXC1   | -0.639050451 | 2.83630744 | -6.250693126 | 1.70E-09 | 6.14E-09 | 10.82999043 |
| OXA1L   | -0.274642026 | 6.44517584 | -6.250066845 | 1.70E-09 | 6.16E-09 | 10.82659671 |
| KCNJ2   | 1.152052413  | 3.33634533 | 6.248098603  | 1.72E-09 | 6.22E-09 | 10.81593273 |
| METTL4  | -0.346949542 | 2.68567178 | -6.246527546 | 1.74E-09 | 6.28E-09 | 10.80742248 |
| ZKSCAN  | -0.446604298 | 1.88774584 | -6.243917748 | 1.76E-09 | 6.37E-09 | 10.79328894 |
| RERGL   | -0.642638771 | 1.00796899 | -6.242694882 | 1.77E-09 | 6.41E-09 | 10.78666793 |
| PFKFB2  | -0.79707406  | 4.48946906 | -6.242375811 | 1.78E-09 | 6.42E-09 | 10.78494052 |
| ZNF518E | -0.564122081 | 2.98185712 | -6.24165556  | 1.78E-09 | 6.44E-09 | 10.78104143 |
| MAP3K1  | -0.326781716 | 2.8694185  | -6.240801371 | 1.79E-09 | 6.47E-09 | 10.77641769 |
| BSCL2   | -0.40789569  | 3.0175902  | -6.240428183 | 1.80E-09 | 6.49E-09 | 10.77439776 |
| FREM2   | -0.797228851 | 2.57833008 | -6.239639077 | 1.80E-09 | 6.51E-09 | 10.77012691 |
| HS6ST3  | -0.701006231 | 1.02236419 | -6.239434702 | 1.81E-09 | 6.52E-09 | 10.76902084 |
| ELFN2   | 0.580592225  | 0.51254681 | 6.238541077  | 1.82E-09 | 6.55E-09 | 10.76418491 |
| METAP1  | -0.34358368  | 1.85273427 | -6.238128001 | 1.82E-09 | 6.56E-09 | 10.76194968 |
| GALC    | -0.493951286 | 4.09668507 | -6.238024618 | 1.82E-09 | 6.57E-09 | 10.76139028 |
| PPP1R1  | -0.460150576 | 5.82184519 | -6.235690522 | 1.84E-09 | 6.65E-09 | 10.74876228 |
| KAT7    | -0.434972787 | 4.21897151 | -6.235308902 | 1.85E-09 | 6.66E-09 | 10.74669795 |
| HIF3A   | -0.397524693 | 0.72162957 | -6.235217077 | 1.85E-09 | 6.66E-09 | 10.74620125 |
| ZNF785  | -0.379778583 | 3.20507778 | -6.234768509 | 1.85E-09 | 6.68E-09 | 10.74377493 |
| SLC25A1 | -0.411746937 | 6.69856976 | -6.233402657 | 1.87E-09 | 6.73E-09 | 10.73638776 |
| CLTCL1  | -0.398357977 | 1.88276807 | -6.233397407 | 1.87E-09 | 6.73E-09 | 10.73635937 |
| RHOB    | -0.772798304 | 8.00680792 | -6.231409962 | 1.89E-09 | 6.80E-09 | 10.72561248 |
| MXRA7   | -0.675228866 | 6.48561108 | -6.230998161 | 1.89E-09 | 6.81E-09 | 10.72338602 |
| GPR4    | -0.638424241 | 3.89648533 | -6.230431615 | 1.90E-09 | 6.83E-09 | 10.72032309 |
| PCDH9   | 0.342722555  | 0.45393196 | 6.228942192  | 1.91E-09 | 6.89E-09 | 10.71227178 |
| VEZT    | -0.471498827 | 5.08704126 | -6.228722239 | 1.92E-09 | 6.90E-09 | 10.71108291 |
| SZRD1   | -0.33405695  | 6.50145075 | -6.228703752 | 1.92E-09 | 6.90E-09 | 10.71098299 |
| UBE2K   | -0.405436722 | 5.50187203 | -6.22812454  | 1.92E-09 | 6.92E-09 | 10.70785243 |
| YWHAB   | -0.406078312 | 7.90047617 | -6.22795803  | 1.92E-09 | 6.92E-09 | 10.70695251 |
| SDK2    | -0.645516874 | 1.10142401 | -6.226490655 | 1.94E-09 | 6.98E-09 | 10.69902269 |
| ZFAND4  | -0.370541789 | 2.54677415 | -6.22645871  | 1.94E-09 | 6.98E-09 | 10.69885007 |

|                   |              |             |              |          |             |             |
|-------------------|--------------|-------------|--------------|----------|-------------|-------------|
| ZNF653            | -0.365008418 | 3.0257536   | -6.225533291 | 1.95E-09 | 7.01E-09    | 10.69384976 |
| IGFBP7            | -0.635320612 | 9.13588468  | -6.225080203 | 1.96E-09 | 7.03E-09    | 10.69140178 |
| CNOT3             | -0.379465466 | 4.53390434  | -6.224870459 | 1.96E-09 | 7.03E-09    | 10.69026861 |
| CH25H             | 1.117803749  | 2.78993525  | 6.224867215  | 1.96E-09 | 7.03E-09    | 10.69025109 |
| HPRT1             | -0.314516525 | 5.79619462  | -6.22478572  | 1.96E-09 | 7.03E-09    | 10.6898108  |
| MUC16             | 0.481497748  | 0.40076884  | 6.224369733  | 1.96E-09 | 7.05E-09    | 10.68756348 |
| GOLGA8            | -0.183777501 | 0.25801821  | -6.224131456 | 1.97E-09 | 7.06E-09    | 10.68627626 |
| TNFRSF:0.95155947 | 4.5595924    | 6.221799765 | 1.99E-09     | 7.15E-09 | 10.67368194 |             |
| RIPK1             | -0.39928079  | 4.85683518  | -6.221027484 | 2.00E-09 | 7.18E-09    | 10.66951134 |
| FBXO24            | -0.235620216 | 0.63575464  | -6.220515061 | 2.01E-09 | 7.19E-09    | 10.66674427 |
| GUF1              | -0.350251068 | 4.00843237  | -6.22007588  | 2.01E-09 | 7.21E-09    | 10.66437284 |
| IYD               | -1.387232584 | 7.25137968  | -6.218931805 | 2.02E-09 | 7.25E-09    | 10.65819581 |
| TBP               | -0.345232397 | 4.34953458  | -6.218413602 | 2.03E-09 | 7.27E-09    | 10.65539822 |
| CEP63             | -0.338098827 | 3.33176323  | -6.217401004 | 2.04E-09 | 7.31E-09    | 10.64993209 |
| INKA1             | -0.620990829 | 2.78336304  | -6.217319325 | 2.04E-09 | 7.32E-09    | 10.6494912  |
| TRAPPC            | -0.31134706  | 3.23127244  | -6.216784161 | 2.05E-09 | 7.34E-09    | 10.64660261 |
| LTO1              | -0.329917564 | 2.73446756  | -6.215644086 | 2.06E-09 | 7.38E-09    | 10.64044957 |
| THG1L             | -0.383890292 | 4.16337326  | -6.21547854  | 2.06E-09 | 7.39E-09    | 10.63955618 |
| LRRCC1            | -0.500599365 | 3.43405675  | -6.215383539 | 2.06E-09 | 7.39E-09    | 10.6390435  |
| PRKAB1            | -0.392786949 | 4.58270276  | -6.214175056 | 2.08E-09 | 7.44E-09    | 10.63252236 |
| GP9               | -0.186828565 | 0.19790528  | -6.21406689  | 2.08E-09 | 7.44E-09    | 10.63193873 |
| CLEC1A            | -0.447859096 | 1.89116584  | -6.213816501 | 2.08E-09 | 7.45E-09    | 10.63058773 |
| TARSL2            | -0.367290948 | 3.58641852  | -6.213807624 | 2.08E-09 | 7.45E-09    | 10.63053984 |
| MAN1B1            | -0.399254606 | 5.08321289  | -6.213063835 | 2.09E-09 | 7.48E-09    | 10.6265269  |
| LYSMD2            | -0.472446003 | 3.91500613  | -6.212436401 | 2.10E-09 | 7.50E-09    | 10.62314199 |
| BORCS8            | -0.293836035 | 1.08638557  | -6.211873687 | 2.10E-09 | 7.52E-09    | 10.62010646 |
| TSPAN1            | -0.123390926 | 0.08409622  | -6.209111957 | 2.14E-09 | 7.64E-09    | 10.60521137 |
| ASGR1             | -0.668730702 | 2.01146311  | -6.206755077 | 2.16E-09 | 7.73E-09    | 10.59250366 |
| E2F5              | -0.372632812 | 2.66948475  | -6.20561172  | 2.18E-09 | 7.78E-09    | 10.58634025 |
| SHROOM            | 0.812675993  | 3.97164766  | 6.205307899  | 2.18E-09 | 7.79E-09    | 10.58470261 |
| RPS17             | -0.39896168  | 8.90239519  | -6.204462499 | 2.19E-09 | 7.83E-09    | 10.58014607 |
| BANF2             | -0.366399004 | 0.28509814  | -6.203528244 | 2.20E-09 | 7.87E-09    | 10.57511115 |
| BEX4              | -0.517646962 | 8.01474073  | -6.203021629 | 2.21E-09 | 7.89E-09    | 10.57238112 |
| PRKCZ             | -0.535266479 | 3.90982513  | -6.20265169  | 2.21E-09 | 7.90E-09    | 10.57038772 |
| EXTL3             | -0.372529862 | 3.43040373  | -6.202351567 | 2.22E-09 | 7.91E-09    | 10.56877057 |
| LIPJ              | -0.142087948 | 0.14319002  | -6.202319847 | 2.22E-09 | 7.91E-09    | 10.56859966 |
| TONSL             | -0.423391909 | 2.40540331  | -6.202157675 | 2.22E-09 | 7.92E-09    | 10.56772586 |
| PDF               | -0.480961041 | 2.68641787  | -6.201549321 | 2.23E-09 | 7.94E-09    | 10.56444813 |
| ZNF641            | -0.391409038 | 3.42133963  | -6.200352227 | 2.24E-09 | 7.99E-09    | 10.55799906 |
| CDH13             | -0.639478773 | 2.58804529  | -6.199977324 | 2.25E-09 | 8.01E-09    | 10.55597954 |

|         |              |            |              |          |          |             |
|---------|--------------|------------|--------------|----------|----------|-------------|
| VTI1A   | -0.312334575 | 2.98220101 | -6.199470056 | 2.25E-09 | 8.03E-09 | 10.55324715 |
| C3orf62 | -0.328802058 | 3.0566958  | -6.199001067 | 2.26E-09 | 8.05E-09 | 10.55072109 |
| JAM2    | -0.578046137 | 3.10704949 | -6.198840624 | 2.26E-09 | 8.05E-09 | 10.54985695 |
| RASSF9  | -0.465721299 | 1.0429557  | -6.197958271 | 2.27E-09 | 8.09E-09 | 10.54510491 |
| PSMA6   | -0.387525445 | 3.12876157 | -6.195644044 | 2.30E-09 | 8.19E-09 | 10.53264369 |
| HMBOX1  | -0.343396768 | 2.90522227 | -6.189312539 | 2.38E-09 | 8.48E-09 | 10.49856852 |
| CTDSP1  | -0.388375838 | 7.00841846 | -6.189011099 | 2.39E-09 | 8.50E-09 | 10.49694686 |
| TSGA10I | -0.917322761 | 1.60536345 | -6.188886696 | 2.39E-09 | 8.50E-09 | 10.49627762 |
| CXCL2   | 1.390349098  | 3.67403177 | 6.188882393  | 2.39E-09 | 8.50E-09 | 10.49625448 |
| NUAK2   | -0.644794753 | 4.33148421 | -6.187984686 | 2.40E-09 | 8.54E-09 | 10.49142549 |
| MRPS23  | -0.368090661 | 4.81608728 | -6.187946774 | 2.40E-09 | 8.54E-09 | 10.49122156 |
| SLC17A5 | 0.711426553  | 1.88314064 | 6.187885504  | 2.40E-09 | 8.54E-09 | 10.49089199 |
| SPRTN   | -0.343538278 | 2.34011702 | -6.187287949 | 2.41E-09 | 8.57E-09 | 10.48767793 |
| SLC4A11 | -0.355353632 | 4.26795978 | -6.1870992   | 2.41E-09 | 8.57E-09 | 10.48666275 |
| SETDB2  | -0.378956649 | 3.15789596 | -6.18622445  | 2.42E-09 | 8.61E-09 | 10.48195824 |
| TFF1    | -0.661264866 | 0.57489014 | -6.18459007  | 2.45E-09 | 8.69E-09 | 10.47316969 |
| BABAM2  | -0.350513394 | 4.99549957 | -6.183568732 | 2.46E-09 | 8.74E-09 | 10.46767852 |
| ADGRD1  | -0.794322325 | 2.60245795 | -6.182840702 | 2.47E-09 | 8.77E-09 | 10.46376471 |
| KIF5C   | -0.717886612 | 1.32429216 | -6.182089954 | 2.48E-09 | 8.80E-09 | 10.45972913 |
| SH3BP5  | -0.724007675 | 3.24383218 | -6.18180683  | 2.48E-09 | 8.82E-09 | 10.45820732 |
| PLPP6   | -0.401795497 | 3.90578728 | -6.181587271 | 2.49E-09 | 8.83E-09 | 10.4570272  |
| PRORP   | -0.284777564 | 1.80282478 | -6.180856259 | 2.50E-09 | 8.86E-09 | 10.45309829 |
| SMYD2   | -0.38795559  | 4.39815192 | -6.179825933 | 2.51E-09 | 8.91E-09 | 10.44756128 |
| GADD45  | -0.511098503 | 6.55923317 | -6.179530523 | 2.52E-09 | 8.92E-09 | 10.44597385 |
| ABCA8   | -0.755106008 | 1.88108244 | -6.177482665 | 2.54E-09 | 9.02E-09 | 10.43497099 |
| TTC9B   | -0.240933461 | 0.41848228 | -6.177199559 | 2.55E-09 | 9.03E-09 | 10.43345011 |
| XPO6    | -0.342173134 | 5.14460645 | -6.175623689 | 2.57E-09 | 9.11E-09 | 10.42498529 |
| EIF2B1  | -0.292980448 | 5.06388681 | -6.175330518 | 2.57E-09 | 9.12E-09 | 10.42341069 |
| TBCC    | -0.362355982 | 5.63661645 | -6.174867287 | 2.58E-09 | 9.14E-09 | 10.42092283 |
| RPP30   | -0.247442715 | 3.6052046  | -6.17441877  | 2.59E-09 | 9.16E-09 | 10.41851412 |
| XKR4    | 0.177365114  | 0.15821909 | 6.173774031  | 2.60E-09 | 9.19E-09 | 10.41505185 |
| ARPC3   | -0.283888526 | 7.473598   | -6.171748278 | 2.63E-09 | 9.30E-09 | 10.40417523 |
| CAPN7   | -0.479797272 | 4.65656213 | -6.170154502 | 2.65E-09 | 9.38E-09 | 10.39561983 |
| UBE2Q2  | -0.449630405 | 5.20298734 | -6.170039843 | 2.65E-09 | 9.38E-09 | 10.3950044  |
| USP39   | -0.338355476 | 5.29808455 | -6.168634671 | 2.67E-09 | 9.45E-09 | 10.38746289 |
| ECHDC1  | -0.393703214 | 4.9638272  | -6.167838861 | 2.68E-09 | 9.49E-09 | 10.38319237 |
| RHEB    | -0.410180369 | 5.92608503 | -6.167330102 | 2.69E-09 | 9.51E-09 | 10.38046245 |
| CHCHD3  | -0.45762658  | 5.25920662 | -6.167119813 | 2.69E-09 | 9.52E-09 | 10.37933412 |
| VANGL1  | -0.524195406 | 2.87304553 | -6.165841051 | 2.71E-09 | 9.59E-09 | 10.3724734  |
| KCNRG   | -0.189650621 | 0.56529052 | -6.165350784 | 2.72E-09 | 9.61E-09 | 10.36984334 |

|          |              |            |              |          |          |             |
|----------|--------------|------------|--------------|----------|----------|-------------|
| TM9SF1   | -0.413987088 | 3.07531327 | -6.164811703 | 2.73E-09 | 9.64E-09 | 10.36695158 |
| PI4K2B   | -0.411566845 | 3.15610478 | -6.164357811 | 2.73E-09 | 9.66E-09 | 10.36451694 |
| C3orf70  | -0.442727633 | 1.47632141 | -6.164335812 | 2.74E-09 | 9.66E-09 | 10.36439895 |
| UBIAD1   | -0.363762552 | 3.7650407  | -6.163633423 | 2.75E-09 | 9.70E-09 | 10.36063167 |
| GCLC     | -0.570301435 | 3.99259679 | -6.163240137 | 2.75E-09 | 9.71E-09 | 10.35852241 |
| OLA1     | -0.359303089 | 5.29561879 | -6.163214772 | 2.75E-09 | 9.71E-09 | 10.35838638 |
| TIMM44   | -0.332891272 | 4.67764587 | -6.163211992 | 2.75E-09 | 9.71E-09 | 10.35837147 |
| FMO4     | -0.358716631 | 2.7821878  | -6.16259279  | 2.76E-09 | 9.74E-09 | 10.3550508  |
| KRT15    | 0.715473652  | 1.30484137 | 6.162136575  | 2.77E-09 | 9.77E-09 | 10.35260436 |
| DNTTIP2  | -0.328598064 | 4.51140526 | -6.161562071 | 2.78E-09 | 9.79E-09 | 10.34952378 |
| PPP6C    | -0.379703378 | 5.74834619 | -6.15969605  | 2.81E-09 | 9.89E-09 | 10.33951938 |
| ZHX3     | -0.51624825  | 3.72329904 | -6.159649047 | 2.81E-09 | 9.89E-09 | 10.33926741 |
| CCL18    | 1.647685074  | 3.99184524 | 6.159528374  | 2.81E-09 | 9.90E-09 | 10.33862052 |
| IQGAP3   | 0.484563962  | 1.13204126 | 6.159321395  | 2.81E-09 | 9.91E-09 | 10.33751099 |
| TMEM18   | -0.358278458 | 3.62900412 | -6.158792024 | 2.82E-09 | 9.93E-09 | 10.33467338 |
| AKAP7    | -0.432182851 | 2.59609085 | -6.1585815   | 2.82E-09 | 9.94E-09 | 10.33354495 |
| C1orf52  | -0.350597959 | 3.58708096 | -6.158419287 | 2.83E-09 | 9.95E-09 | 10.33267549 |
| POFUT1   | -0.423912895 | 4.99288011 | -6.158234549 | 2.83E-09 | 9.96E-09 | 10.33168532 |
| CD74     | 0.94163567   | 10.5698719 | 6.157079574  | 2.85E-09 | 1.00E-08 | 10.3254953  |
| FBXW10   | -0.209881379 | 0.20826024 | -6.156865995 | 2.85E-09 | 1.00E-08 | 10.32435073 |
| RPS21    | -0.46762689  | 9.57250263 | -6.154627093 | 2.89E-09 | 1.02E-08 | 10.31235422 |
| DAPP1    | 0.62853616   | 1.13036877 | 6.153376099  | 2.90E-09 | 1.02E-08 | 10.30565254 |
| SEN3     | -0.350686371 | 4.21868639 | -6.152181125 | 2.92E-09 | 1.03E-08 | 10.29925191 |
| LRG1     | 1.166836618  | 2.92381838 | 6.151940693  | 2.93E-09 | 1.03E-08 | 10.2979642  |
| SLC10A7  | -0.367700319 | 2.09209543 | -6.150994576 | 2.94E-09 | 1.03E-08 | 10.29289731 |
| PRMT5    | -0.608754596 | 5.14419971 | -6.150011632 | 2.96E-09 | 1.04E-08 | 10.28763382 |
| GYG2     | -0.593672279 | 1.56302189 | -6.149994674 | 2.96E-09 | 1.04E-08 | 10.28754302 |
| PALM     | 0.960719747  | 4.79744792 | 6.149727417  | 2.96E-09 | 1.04E-08 | 10.28611202 |
| LRWD1    | -0.329798023 | 3.49316475 | -6.14926448  | 2.97E-09 | 1.04E-08 | 10.28363337 |
| HOMER1   | -0.596513055 | 3.88395647 | -6.14879759  | 2.98E-09 | 1.05E-08 | 10.2811337  |
| HTR1E    | -0.315259697 | 0.27399869 | -6.148756093 | 2.98E-09 | 1.05E-08 | 10.28091154 |
| C6orf118 | -0.16460234  | 0.13677015 | -6.14747176  | 3.00E-09 | 1.05E-08 | 10.27403614 |
| AOC3     | -0.745116064 | 3.71398962 | -6.146505626 | 3.02E-09 | 1.06E-08 | 10.26886485 |
| TARS     | -0.447095609 | 5.05350602 | -6.146499392 | 3.02E-09 | 1.06E-08 | 10.26883148 |
| HAUS7    | -0.383397213 | 1.37153117 | -6.146339957 | 3.02E-09 | 1.06E-08 | 10.26797816 |
| MCRIP1   | -0.406954586 | 6.26992377 | -6.145917884 | 3.03E-09 | 1.06E-08 | 10.26571922 |
| DFFA     | -0.316070212 | 4.39049036 | -6.145652726 | 3.03E-09 | 1.06E-08 | 10.26430016 |
| PXYLP1   | -0.675066303 | 3.22587939 | -6.14490595  | 3.04E-09 | 1.07E-08 | 10.26030383 |
| ZNF414   | -0.37917682  | 4.11824138 | -6.144889913 | 3.04E-09 | 1.07E-08 | 10.26021801 |
| JMJD6    | -0.351145745 | 3.37996149 | -6.144547986 | 3.05E-09 | 1.07E-08 | 10.25838833 |

|         |              |            |              |          |          |             |
|---------|--------------|------------|--------------|----------|----------|-------------|
| C5orf47 | -0.142241227 | 0.17668408 | -6.144351761 | 3.05E-09 | 1.07E-08 | 10.25733834 |
| CHCHD7  | -0.340607017 | 4.13592783 | -6.144326092 | 3.05E-09 | 1.07E-08 | 10.25720099 |
| CNIH1   | -0.393780388 | 5.19071215 | -6.143406555 | 3.07E-09 | 1.07E-08 | 10.25228097 |
| MPP5    | -0.543065884 | 4.34775784 | -6.143380437 | 3.07E-09 | 1.07E-08 | 10.25214123 |
| AKAP10  | -0.457201508 | 4.23958381 | -6.143016203 | 3.08E-09 | 1.08E-08 | 10.25019254 |
| PLA2G2E | 0.718988413  | 0.81316294 | 6.143007474  | 3.08E-09 | 1.08E-08 | 10.25014584 |
| SLC35F5 | -0.562772361 | 4.83753627 | -6.142670625 | 3.08E-09 | 1.08E-08 | 10.24834374 |
| EVA1B   | -0.70860667  | 5.00719375 | -6.141972821 | 3.09E-09 | 1.08E-08 | 10.24461081 |
| COG3    | -0.436692106 | 4.18456641 | -6.141144749 | 3.11E-09 | 1.09E-08 | 10.24018141 |
| ONECUT  | -0.083359844 | 0.08999092 | -6.139386034 | 3.14E-09 | 1.10E-08 | 10.23077543 |
| SEC61A  | -0.37697208  | 7.75002486 | -6.138960303 | 3.14E-09 | 1.10E-08 | 10.22849884 |
| ZNF75A  | -0.407599504 | 3.04432602 | -6.138614975 | 3.15E-09 | 1.10E-08 | 10.22665228 |
| BVES    | -0.48019208  | 0.9162086  | -6.137792197 | 3.16E-09 | 1.11E-08 | 10.22225298 |
| GYS1    | -0.307442825 | 5.12073306 | -6.137633501 | 3.17E-09 | 1.11E-08 | 10.22140451 |
| CRYZ    | -0.519414389 | 5.19342953 | -6.135891832 | 3.20E-09 | 1.12E-08 | 10.21209364 |
| HS1BP3  | -0.326571325 | 3.90007391 | -6.135345324 | 3.21E-09 | 1.12E-08 | 10.20917244 |
| ANKS1B  | -0.385924976 | 0.92033994 | -6.133377315 | 3.24E-09 | 1.13E-08 | 10.19865463 |
| LCP1    | 1.043370402  | 4.9128451  | 6.132775646  | 3.25E-09 | 1.14E-08 | 10.19543957 |
| EGLN1   | -0.434715441 | 4.5007841  | -6.132669777 | 3.25E-09 | 1.14E-08 | 10.19487388 |
| WDR70   | -0.304182424 | 3.4991602  | -6.129858616 | 3.31E-09 | 1.15E-08 | 10.17985556 |
| NR2F6   | -0.428444665 | 5.99565732 | -6.128933928 | 3.32E-09 | 1.16E-08 | 10.17491664 |
| VTA1    | -0.376271645 | 3.79322242 | -6.128810414 | 3.32E-09 | 1.16E-08 | 10.17425697 |
| CNOT4   | -0.360202311 | 3.60974604 | -6.127927322 | 3.34E-09 | 1.17E-08 | 10.1695408  |
| NME1-NI | -0.365716649 | 1.54562116 | -6.127676306 | 3.34E-09 | 1.17E-08 | 10.16820034 |
| CLN6    | -0.320261134 | 4.81786163 | -6.127457863 | 3.35E-09 | 1.17E-08 | 10.16703386 |
| ZNF284  | -0.252398254 | 1.51569722 | -6.12601309  | 3.38E-09 | 1.18E-08 | 10.15931956 |
| ARMCX5  | -0.403141476 | 3.57210054 | -6.124803097 | 3.40E-09 | 1.18E-08 | 10.1528599  |
| ASPHD1  | 0.843541433  | 1.75137541 | 6.12457872   | 3.40E-09 | 1.19E-08 | 10.15166214 |
| RSPH4A  | -0.448260375 | 0.95469639 | -6.124418313 | 3.41E-09 | 1.19E-08 | 10.15080589 |
| STK11IP | -0.395433127 | 3.69702213 | -6.124075999 | 3.41E-09 | 1.19E-08 | 10.14897867 |
| THAP6   | -0.34305608  | 2.94590962 | -6.123474064 | 3.42E-09 | 1.19E-08 | 10.14576582 |
| SHLD2   | -0.423886861 | 4.05419343 | -6.122464211 | 3.44E-09 | 1.20E-08 | 10.14037621 |
| KLK6    | 1.267175556  | 1.42441507 | 6.122448832  | 3.44E-09 | 1.20E-08 | 10.14029414 |
| RTCA    | -0.298528675 | 4.83227834 | -6.122336476 | 3.44E-09 | 1.20E-08 | 10.13969454 |
| MPHOSF  | -0.35857661  | 4.55541736 | -6.121799193 | 3.45E-09 | 1.20E-08 | 10.13682737 |
| PIWIL1  | -1.331769123 | 2.19720192 | -6.121501089 | 3.46E-09 | 1.20E-08 | 10.13523663 |
| PCMTD1  | -0.473206654 | 5.14621416 | -6.12093679  | 3.47E-09 | 1.21E-08 | 10.1322256  |
| FOXE1   | -0.772398778 | 7.8440808  | -6.120583946 | 3.48E-09 | 1.21E-08 | 10.13034297 |
| POLD4   | -0.35506903  | 4.24981951 | -6.11977564  | 3.49E-09 | 1.21E-08 | 10.12603049 |
| SMCO4   | -0.478205765 | 5.87009067 | -6.119327899 | 3.50E-09 | 1.22E-08 | 10.12364188 |

|          |              |            |              |          |          |             |
|----------|--------------|------------|--------------|----------|----------|-------------|
| OTOR     | -0.099548292 | 0.11338429 | -6.119287696 | 3.50E-09 | 1.22E-08 | 10.12342742 |
| DRC1     | -0.287590478 | 0.28250678 | -6.119162457 | 3.50E-09 | 1.22E-08 | 10.12275932 |
| GPATCH   | -0.323871785 | 3.26045283 | -6.118809919 | 3.51E-09 | 1.22E-08 | 10.12087872 |
| ZNF540   | -0.476510491 | 3.02299651 | -6.118269708 | 3.52E-09 | 1.22E-08 | 10.11799716 |
| SLC2A9   | -0.398436919 | 1.52184361 | -6.11715764  | 3.54E-09 | 1.23E-08 | 10.11206583 |
| PDCD10   | -0.42726862  | 4.66681329 | -6.11638969  | 3.56E-09 | 1.24E-08 | 10.10797035 |
| USP2     | -0.605732133 | 2.18866323 | -6.113764538 | 3.61E-09 | 1.25E-08 | 10.09397331 |
| PIGB     | -0.413734169 | 3.43328922 | -6.113041866 | 3.62E-09 | 1.26E-08 | 10.09012088 |
| CFTR     | 0.291500705  | 0.30562101 | 6.112600719  | 3.63E-09 | 1.26E-08 | 10.08776937 |
| FOCAD    | -0.471531841 | 4.32900526 | -6.112289234 | 3.64E-09 | 1.26E-08 | 10.0861091  |
| TNFSF11  | 0.542210358  | 0.6563332  | 6.112186227  | 3.64E-09 | 1.26E-08 | 10.08556006 |
| KIAA119  | -0.429589289 | 6.74928863 | -6.110901688 | 3.67E-09 | 1.27E-08 | 10.07871398 |
| FKRP     | -0.342712316 | 3.51909098 | -6.110745465 | 3.67E-09 | 1.27E-08 | 10.07788145 |
| CD300LF  | 0.642508119  | 1.67261    | 6.110646034  | 3.67E-09 | 1.27E-08 | 10.07735157 |
| BRD3OS   | -0.428791492 | 4.14402428 | -6.109792524 | 3.69E-09 | 1.28E-08 | 10.07280343 |
| HNRNPC   | -0.339684474 | 6.25281058 | -6.109786655 | 3.69E-09 | 1.28E-08 | 10.07277216 |
| TGFR2    | -0.676928392 | 6.04883463 | -6.108969527 | 3.71E-09 | 1.28E-08 | 10.06841834 |
| TBC1D2   | 0.831081715  | 5.78144658 | 6.108692066  | 3.71E-09 | 1.29E-08 | 10.06694007 |
| AP1B1    | -0.357334064 | 5.770366   | -6.108489957 | 3.72E-09 | 1.29E-08 | 10.06586329 |
| RPL30    | -0.37802799  | 8.74067032 | -6.108477192 | 3.72E-09 | 1.29E-08 | 10.06579529 |
| CCAR2    | -0.326635323 | 5.21122144 | -6.10794348  | 3.73E-09 | 1.29E-08 | 10.06295197 |
| C11orf68 | -0.379335788 | 6.5416409  | -6.107728383 | 3.73E-09 | 1.29E-08 | 10.06180611 |
| METTL2   | -0.304914008 | 3.38587284 | -6.107644477 | 3.73E-09 | 1.29E-08 | 10.06135913 |
| SSR2     | -0.333579478 | 6.06831436 | -6.106158011 | 3.76E-09 | 1.30E-08 | 10.05344133 |
| KNSTRN   | -0.669896972 | 4.29724731 | -6.10477061  | 3.79E-09 | 1.31E-08 | 10.04605251 |
| ZNF813   | -0.349231515 | 2.08745468 | -6.10417272  | 3.80E-09 | 1.32E-08 | 10.04286874 |
| MON1B    | -0.381151932 | 4.6604418  | -6.103994266 | 3.81E-09 | 1.32E-08 | 10.04191851 |
| ALG13    | -0.383218799 | 3.56949434 | -6.102166412 | 3.85E-09 | 1.33E-08 | 10.03218682 |
| COG4     | -0.35792639  | 5.52746453 | -6.10175522  | 3.85E-09 | 1.33E-08 | 10.02999789 |
| DLST     | -0.430297034 | 6.20410182 | -6.101603652 | 3.86E-09 | 1.33E-08 | 10.02919106 |
| FAM124   | -0.526243743 | 1.11822114 | -6.100428467 | 3.88E-09 | 1.34E-08 | 10.02293583 |
| TMX1     | -0.461460361 | 4.8954051  | -6.100322091 | 3.88E-09 | 1.34E-08 | 10.02236966 |
| PYROXD   | -0.322461031 | 3.35730018 | -6.097345491 | 3.95E-09 | 1.36E-08 | 10.00653013 |
| PRXL2B   | -0.409776844 | 4.47084141 | -6.096779128 | 3.96E-09 | 1.37E-08 | 10.00351697 |
| SERTM1   | -1.138479878 | 1.38598705 | -6.09664752  | 3.96E-09 | 1.37E-08 | 10.00281682 |
| FGFR1O   | -0.351930543 | 2.07243641 | -6.095912497 | 3.98E-09 | 1.37E-08 | 9.998906729 |
| KANSL2   | -0.389392473 | 4.50876425 | -6.09521048  | 3.99E-09 | 1.38E-08 | 9.995172545 |
| U2AF2    | -0.36063358  | 6.74600669 | -6.093897847 | 4.02E-09 | 1.39E-08 | 9.988191221 |
| PGAM1    | -0.543540789 | 4.71200706 | -6.09301312  | 4.04E-09 | 1.39E-08 | 9.98348638  |
| RNPS1    | -0.314169936 | 5.20711475 | -6.092771754 | 4.05E-09 | 1.40E-08 | 9.982202921 |

|          |              |            |              |          |          |             |
|----------|--------------|------------|--------------|----------|----------|-------------|
| GALK1    | -0.379312729 | 3.85950911 | -6.092180069 | 4.06E-09 | 1.40E-08 | 9.979056805 |
| C1orf43  | -0.386025635 | 7.83691226 | -6.091754418 | 4.07E-09 | 1.40E-08 | 9.976793668 |
| CDC42    | -0.367977118 | 7.39169638 | -6.091597919 | 4.07E-09 | 1.40E-08 | 9.975961611 |
| WDR60    | -0.429195731 | 3.51250511 | -6.08991579  | 4.11E-09 | 1.42E-08 | 9.967019256 |
| BCKDHA   | -0.547847932 | 2.93178759 | -6.089249725 | 4.13E-09 | 1.42E-08 | 9.963478906 |
| PPP1R3I  | -0.372713449 | 3.14432178 | -6.088940991 | 4.13E-09 | 1.42E-08 | 9.961837981 |
| TAF10    | -0.340512065 | 5.08027379 | -6.087758558 | 4.16E-09 | 1.43E-08 | 9.95555391  |
| ZBED9    | -0.371584964 | 1.5810381  | -6.086370387 | 4.19E-09 | 1.44E-08 | 9.948177599 |
| MAN2B2   | -0.460609256 | 5.19500623 | -6.083265471 | 4.26E-09 | 1.47E-08 | 9.931683587 |
| POMC     | -0.740086506 | 1.52441494 | -6.082351835 | 4.29E-09 | 1.47E-08 | 9.926831347 |
| ICAM2    | -0.51551424  | 3.41495804 | -6.081404994 | 4.31E-09 | 1.48E-08 | 9.921803326 |
| CTHRC1   | 1.273615156  | 3.34315574 | 6.080358448  | 4.33E-09 | 1.49E-08 | 9.916246521 |
| ZDHHC3   | -0.421799763 | 4.79399658 | -6.080216442 | 4.34E-09 | 1.49E-08 | 9.915492574 |
| RAB4B    | -0.363908001 | 3.60134322 | -6.079872094 | 4.34E-09 | 1.49E-08 | 9.913664391 |
| ZNF324   | -0.314602148 | 2.87102075 | -6.078807041 | 4.37E-09 | 1.50E-08 | 9.908010396 |
| SND1     | -0.3995708   | 6.63758673 | -6.078376402 | 4.38E-09 | 1.50E-08 | 9.905724488 |
| SLC19A1  | -0.587722392 | 1.84240293 | -6.07753131  | 4.40E-09 | 1.51E-08 | 9.901238954 |
| PARS2    | -0.388214834 | 3.0640905  | -6.077133399 | 4.41E-09 | 1.51E-08 | 9.8991271   |
| PPM1H    | -0.554516182 | 2.7255731  | -6.076009556 | 4.44E-09 | 1.52E-08 | 9.893163036 |
| GANAB    | -0.47946865  | 7.9920414  | -6.075793051 | 4.44E-09 | 1.53E-08 | 9.892014169 |
| KCP      | 0.772634288  | 1.818186   | 6.075696727  | 4.44E-09 | 1.53E-08 | 9.891503046 |
| AFTPH    | -0.342397411 | 4.52509344 | -6.075199866 | 4.46E-09 | 1.53E-08 | 9.888866644 |
| AANAT    | -0.147663392 | 0.26737244 | -6.074619593 | 4.47E-09 | 1.53E-08 | 9.885787851 |
| KIF1BP   | -0.453013383 | 5.31039901 | -6.07461793  | 4.47E-09 | 1.53E-08 | 9.885779028 |
| SLC35B2  | -0.404918708 | 6.30529279 | -6.074550748 | 4.47E-09 | 1.53E-08 | 9.885422593 |
| ENPP5    | -0.561941102 | 5.80529115 | -6.073575437 | 4.49E-09 | 1.54E-08 | 9.88024836  |
| NOMO1    | -0.364116212 | 4.49981774 | -6.073132359 | 4.51E-09 | 1.55E-08 | 9.877897938 |
| CD81     | -0.394029075 | 7.84773592 | -6.071968758 | 4.53E-09 | 1.55E-08 | 9.871725938 |
| AATF     | -0.307929006 | 5.08586252 | -6.071789281 | 4.54E-09 | 1.56E-08 | 9.87077403  |
| CHMP5    | -0.425031881 | 6.78529205 | -6.071754993 | 4.54E-09 | 1.56E-08 | 9.870592176 |
| FBXW4    | -0.306132206 | 5.752061   | -6.071025705 | 4.56E-09 | 1.56E-08 | 9.866724419 |
| SNAP29   | -0.323317391 | 4.47461337 | -6.070779441 | 4.56E-09 | 1.56E-08 | 9.865418445 |
| SESN1    | -0.419320831 | 5.12563853 | -6.070177861 | 4.58E-09 | 1.57E-08 | 9.862228343 |
| HK3      | 0.740332904  | 1.84472317 | 6.069991199  | 4.58E-09 | 1.57E-08 | 9.861238548 |
| SLC4A5   | -0.891569585 | 3.05464967 | -6.06889863  | 4.61E-09 | 1.58E-08 | 9.855445528 |
| SLC25A4  | -0.39779536  | 4.03812673 | -6.068737744 | 4.61E-09 | 1.58E-08 | 9.854592548 |
| SFRP1    | -1.578204904 | 2.47876727 | -6.068541171 | 4.62E-09 | 1.58E-08 | 9.853550381 |
| ZNF563   | -0.358299163 | 2.95280827 | -6.0680481   | 4.63E-09 | 1.58E-08 | 9.850936391 |
| KCNN2    | -0.223779478 | 0.62445761 | -6.06779471  | 4.64E-09 | 1.59E-08 | 9.84959312  |
| C6orf223 | -0.357046551 | 0.73677885 | -6.067347409 | 4.65E-09 | 1.59E-08 | 9.847221987 |



|         |              |            |              |          |          |             |
|---------|--------------|------------|--------------|----------|----------|-------------|
| ADGRE3  | 0.15687701   | 0.20053608 | 6.064868746  | 4.71E-09 | 1.61E-08 | 9.834085028 |
| IDH2    | -0.410524055 | 5.80611595 | -6.062102873 | 4.78E-09 | 1.64E-08 | 9.819430588 |
| GPAT4   | -0.308147934 | 4.69491527 | -6.060056784 | 4.84E-09 | 1.65E-08 | 9.808592997 |
| CUL5    | -0.44047402  | 4.24536493 | -6.059753151 | 4.85E-09 | 1.66E-08 | 9.806984967 |
| TMEM12  | -0.601712492 | 7.67016    | -6.059734136 | 4.85E-09 | 1.66E-08 | 9.806884268 |
| USP48   | -0.374247213 | 4.31373166 | -6.059497553 | 4.85E-09 | 1.66E-08 | 9.80563138  |
| DGKE    | -0.331201985 | 1.94552642 | -6.058747172 | 4.87E-09 | 1.66E-08 | 9.801657771 |
| IRF2BP2 | -0.464474033 | 6.87049313 | -6.057144232 | 4.92E-09 | 1.68E-08 | 9.793170712 |
| PSD4    | -0.464990179 | 4.41432972 | -6.056893414 | 4.92E-09 | 1.68E-08 | 9.791842861 |
| FAM181I | -0.738968548 | 1.74019108 | -6.056754778 | 4.93E-09 | 1.68E-08 | 9.791108926 |
| ERGIC2  | -0.324627937 | 4.48560925 | -6.052861571 | 5.03E-09 | 1.72E-08 | 9.770503617 |
| SDCBP2  | -0.617203318 | 4.34991681 | -6.052630576 | 5.04E-09 | 1.72E-08 | 9.76928136  |
| NSUN6   | -0.391049965 | 3.1886558  | -6.052309648 | 5.05E-09 | 1.72E-08 | 9.767583297 |
| BIRC7   | 1.396236593  | 2.26927051 | 6.051651676  | 5.06E-09 | 1.73E-08 | 9.76410211  |
| PMAIP1  | 0.869209574  | 2.73209912 | 6.051534198  | 5.07E-09 | 1.73E-08 | 9.763480591 |
| DCBLD1  | -0.480857166 | 2.77816589 | -6.051223705 | 5.08E-09 | 1.73E-08 | 9.761837962 |
| LZIC    | -0.434834504 | 4.49527923 | -6.050467616 | 5.10E-09 | 1.74E-08 | 9.757838222 |
| BBS12   | -0.46066175  | 3.80580999 | -6.050317861 | 5.10E-09 | 1.74E-08 | 9.757046057 |
| TMEM16  | -0.69193445  | 4.61653355 | -6.048689011 | 5.15E-09 | 1.75E-08 | 9.748430805 |
| PTGR1   | -0.557346636 | 4.97422762 | -6.04836473  | 5.16E-09 | 1.76E-08 | 9.74671584  |
| RPS25   | -0.370593839 | 10.0293445 | -6.045723447 | 5.23E-09 | 1.78E-08 | 9.732749926 |
| FNTA    | -0.314212039 | 4.22348856 | -6.045703471 | 5.23E-09 | 1.78E-08 | 9.732644323 |
| RHOC    | -0.363531387 | 7.18452578 | -6.045411199 | 5.24E-09 | 1.78E-08 | 9.731099204 |
| ITGA2B  | -0.42012688  | 1.15214618 | -6.044422509 | 5.27E-09 | 1.79E-08 | 9.725872834 |
| SDC4    | 1.011350849  | 9.41170425 | 6.04389192   | 5.28E-09 | 1.80E-08 | 9.723068321 |
| SORT1   | -0.428972654 | 6.09534716 | -6.042668049 | 5.32E-09 | 1.81E-08 | 9.716600062 |
| MB      | -0.736815666 | 1.14413553 | -6.041896018 | 5.34E-09 | 1.82E-08 | 9.712520316 |
| GUSB    | -0.326799828 | 6.06121803 | -6.041875408 | 5.34E-09 | 1.82E-08 | 9.712411412 |
| TGFBR3  | 0.632714269  | 1.05339886 | 6.041516252  | 5.35E-09 | 1.82E-08 | 9.710513616 |
| COA7    | -0.393765621 | 3.83420058 | -6.041454965 | 5.35E-09 | 1.82E-08 | 9.71018978  |
| PRICKLE | 0.837456083  | 3.72779597 | 6.038481573  | 5.44E-09 | 1.85E-08 | 9.69448161  |
| TAOK2   | -0.360000399 | 4.73424361 | -6.03821292  | 5.45E-09 | 1.85E-08 | 9.693062627 |
| GRWD1   | -0.339158388 | 4.35933598 | -6.036698426 | 5.49E-09 | 1.87E-08 | 9.685064183 |
| P2RX4   | -0.345668451 | 3.60562002 | -6.036247397 | 5.51E-09 | 1.87E-08 | 9.682682469 |
| SPOCD1  | 0.505573194  | 0.72486888 | 6.036033371  | 5.51E-09 | 1.87E-08 | 9.681552325 |
| FAM133F | -0.357380015 | 2.6362965  | -6.035851505 | 5.52E-09 | 1.87E-08 | 9.680592027 |
| PTPN22  | 0.561287211  | 1.14325131 | 6.035174554  | 5.54E-09 | 1.88E-08 | 9.677017727 |
| TTPAL   | -0.402176231 | 3.70661471 | -6.034786288 | 5.55E-09 | 1.88E-08 | 9.674967824 |
| D2HGDH  | -0.465367316 | 3.97999526 | -6.034031246 | 5.57E-09 | 1.89E-08 | 9.670981758 |
| CABCOC  | -0.773816578 | 0.97419669 | -6.032296272 | 5.62E-09 | 1.91E-08 | 9.661823784 |

|         |              |            |              |          |          |             |
|---------|--------------|------------|--------------|----------|----------|-------------|
| ZNF844  | -0.451343799 | 3.86790498 | -6.032198834 | 5.63E-09 | 1.91E-08 | 9.66130952  |
| HIC2    | -0.477359527 | 2.09510166 | -6.031829642 | 5.64E-09 | 1.91E-08 | 9.659361037 |
| MFSD11  | -0.362030506 | 3.677113   | -6.031001068 | 5.66E-09 | 1.92E-08 | 9.654988401 |
| CTSC    | 0.917712717  | 5.53602812 | 6.029130908  | 5.72E-09 | 1.94E-08 | 9.645120659 |
| FAM86B  | -0.407769879 | 1.50580742 | -6.028026403 | 5.76E-09 | 1.95E-08 | 9.639293912 |
| NCK1    | -0.429564744 | 4.49482756 | -6.028018425 | 5.76E-09 | 1.95E-08 | 9.639251825 |
| DDX51   | -0.343738009 | 3.89421674 | -6.02436728  | 5.87E-09 | 1.99E-08 | 9.619996155 |
| IQCD    | -0.350302028 | 2.58891756 | -6.022877459 | 5.92E-09 | 2.01E-08 | 9.612141547 |
| TRMT10I | -0.406191329 | 3.50684293 | -6.021769369 | 5.95E-09 | 2.02E-08 | 9.606300437 |
| SOX4    | 0.778964724  | 5.86571642 | 6.020518427  | 6.00E-09 | 2.03E-08 | 9.599707278 |
| METTL2  | -0.456118584 | 0.5925598  | -6.018769285 | 6.05E-09 | 2.05E-08 | 9.590490051 |
| SP2     | -0.486666924 | 4.84960831 | -6.018557626 | 6.06E-09 | 2.05E-08 | 9.589374839 |
| DCLK3   | -0.333143599 | 0.59180118 | -6.018129274 | 6.07E-09 | 2.06E-08 | 9.587117976 |
| IRF2BP1 | -0.368847373 | 5.57363926 | -6.017538541 | 6.09E-09 | 2.06E-08 | 9.584005771 |
| CDK11B  | -0.322340532 | 4.70079574 | -6.01752083  | 6.09E-09 | 2.06E-08 | 9.583912463 |
| CAND2   | -0.509962004 | 2.35298962 | -6.017222431 | 6.10E-09 | 2.06E-08 | 9.582340474 |
| GOLGA5  | -0.400407539 | 5.81023428 | -6.016790163 | 6.12E-09 | 2.07E-08 | 9.580063359 |
| ZNF263  | -0.33482685  | 3.86849585 | -6.016033788 | 6.14E-09 | 2.08E-08 | 9.576079198 |
| UNC13D  | 0.612918759  | 2.21436262 | 6.015903882  | 6.15E-09 | 2.08E-08 | 9.57539496  |
| KLHL14  | -0.558043111 | 4.36116546 | -6.015825585 | 6.15E-09 | 2.08E-08 | 9.574982564 |
| INIP    | -0.417538434 | 4.11666829 | -6.015533886 | 6.16E-09 | 2.08E-08 | 9.5734462   |
| UCKL1   | -0.346146074 | 4.8947247  | -6.012634715 | 6.26E-09 | 2.11E-08 | 9.558179416 |
| ALDH1A1 | 0.963809563  | 3.00267189 | 6.011482949  | 6.30E-09 | 2.13E-08 | 9.552115853 |
| LRRC4   | -0.485604235 | 1.40657266 | -6.01120577  | 6.31E-09 | 2.13E-08 | 9.550656756 |
| FASTKD1 | -0.383328235 | 3.76349245 | -6.010171335 | 6.34E-09 | 2.14E-08 | 9.545211821 |
| TMEM81  | -0.281536191 | 2.51390661 | -6.010015863 | 6.35E-09 | 2.14E-08 | 9.544393526 |
| ZBTB45  | -0.332810199 | 4.04877562 | -6.009636466 | 6.36E-09 | 2.15E-08 | 9.542396719 |
| SYT14   | 0.633906395  | 2.5335475  | 6.009556378  | 6.36E-09 | 2.15E-08 | 9.54197522  |
| CYB5D1  | -0.48120123  | 1.56041944 | -6.00864923  | 6.39E-09 | 2.16E-08 | 9.537201234 |
| LYZ     | 1.47654719   | 5.89692964 | 6.008528511  | 6.40E-09 | 2.16E-08 | 9.536565976 |
| SFRP2   | 1.993831297  | 4.21173224 | 6.008161728  | 6.41E-09 | 2.16E-08 | 9.534635911 |
| PRR9    | -0.335266242 | 0.28698891 | -6.008132206 | 6.41E-09 | 2.16E-08 | 9.534480565 |
| TASP1   | -0.434464253 | 3.42136013 | -6.006366214 | 6.47E-09 | 2.18E-08 | 9.525188952 |
| SLC25A6 | -0.375332914 | 9.68123332 | -6.006294681 | 6.47E-09 | 2.18E-08 | 9.52481263  |
| MAP10   | -0.577362464 | 2.03870437 | -6.003136748 | 6.59E-09 | 2.22E-08 | 9.508202716 |
| CD1C    | 1.049635073  | 2.01652056 | 6.002801823  | 6.60E-09 | 2.22E-08 | 9.506441477 |
| SRSF2   | -0.389095196 | 6.59348155 | -6.002127601 | 6.62E-09 | 2.23E-08 | 9.502896244 |
| POLG2   | -0.373208683 | 2.97154865 | -6.001886421 | 6.63E-09 | 2.23E-08 | 9.501628131 |
| LRRC34  | -0.348632832 | 1.27713778 | -5.999315021 | 6.72E-09 | 2.26E-08 | 9.488110198 |
| PARP11  | -0.383524823 | 3.02797731 | -5.996723423 | 6.82E-09 | 2.29E-08 | 9.47449049  |

|          |              |            |              |          |          |             |
|----------|--------------|------------|--------------|----------|----------|-------------|
| PTOV1    | -0.420861053 | 6.27537913 | -5.996542116 | 6.82E-09 | 2.30E-08 | 9.473537831 |
| CCR8     | 0.430259746  | 0.5363364  | 5.994145244  | 6.91E-09 | 2.33E-08 | 9.460945704 |
| MTO1     | -0.31002065  | 2.84671115 | -5.993601274 | 6.93E-09 | 2.33E-08 | 9.458088449 |
| CYGB     | -0.717459895 | 4.48593591 | -5.992385691 | 6.98E-09 | 2.35E-08 | 9.451704187 |
| PLA2G1E  | -0.388193871 | 4.30703507 | -5.992259233 | 6.98E-09 | 2.35E-08 | 9.451040087 |
| ZNF672   | -0.311052559 | 5.24666889 | -5.991860491 | 7.00E-09 | 2.35E-08 | 9.448946134 |
| ILKAP    | -0.434398966 | 4.59057256 | -5.990946172 | 7.03E-09 | 2.36E-08 | 9.444145074 |
| SLC6A17  | -0.544114021 | 0.51504171 | -5.989146982 | 7.10E-09 | 2.39E-08 | 9.434699203 |
| PDE4C    | 0.876853287  | 2.49998382 | 5.989031942  | 7.11E-09 | 2.39E-08 | 9.434095307 |
| SLC27A3  | -0.430557378 | 3.44208575 | -5.988936051 | 7.11E-09 | 2.39E-08 | 9.433591938 |
| KARS     | -0.274221166 | 6.44355245 | -5.988052965 | 7.14E-09 | 2.40E-08 | 9.42895658  |
| YIF1B    | -0.320892984 | 4.58208134 | -5.986641909 | 7.20E-09 | 2.42E-08 | 9.421550952 |
| C4orf36  | -0.343910049 | 2.31712264 | -5.986254185 | 7.21E-09 | 2.42E-08 | 9.419516297 |
| SLFN11   | -0.529921167 | 3.93545449 | -5.986086099 | 7.22E-09 | 2.42E-08 | 9.418634259 |
| LTB      | 1.239296699  | 3.00779345 | 5.985789111  | 7.23E-09 | 2.43E-08 | 9.417075857 |
| DCLK1    | 0.521776181  | 1.09762845 | 5.985618607  | 7.24E-09 | 2.43E-08 | 9.416181191 |
| CYP20A1  | -0.348709212 | 3.69357099 | -5.985199046 | 7.26E-09 | 2.43E-08 | 9.413979749 |
| NAGK     | -0.374758562 | 4.38520945 | -5.984906471 | 7.27E-09 | 2.44E-08 | 9.412444678 |
| PHF14    | -0.330840796 | 3.5349446  | -5.984190058 | 7.29E-09 | 2.45E-08 | 9.408686056 |
| C15orf62 | 0.45611327   | 1.83616774 | 5.98373977   | 7.31E-09 | 2.45E-08 | 9.406323824 |
| RIMBP2   | -0.647430522 | 1.26678749 | -5.982625015 | 7.36E-09 | 2.47E-08 | 9.400476336 |
| SCAMP5   | -0.465405151 | 3.94615674 | -5.9815826   | 7.40E-09 | 2.48E-08 | 9.395009053 |
| MED21    | -0.380539553 | 4.65319021 | -5.979026429 | 7.50E-09 | 2.51E-08 | 9.381605424 |
| STMN2    | 0.777640249  | 1.09912634 | 5.978881397  | 7.51E-09 | 2.51E-08 | 9.380845061 |
| ZNF217   | 0.614266112  | 4.87045521 | 5.978744088  | 7.51E-09 | 2.52E-08 | 9.380125195 |
| CRPPA    | -0.249667658 | 1.01645793 | -5.978231713 | 7.53E-09 | 2.52E-08 | 9.377439101 |
| ANKRD2   | -0.377560264 | 3.73279352 | -5.977584944 | 7.56E-09 | 2.53E-08 | 9.374048709 |
| HELQ     | -0.336974697 | 3.6759859  | -5.977514954 | 7.56E-09 | 2.53E-08 | 9.373681834 |
| TM9SF2   | -0.524941784 | 7.43276418 | -5.977248439 | 7.57E-09 | 2.53E-08 | 9.372284842 |
| NMT1     | -0.331843039 | 5.8250895  | -5.976590124 | 7.60E-09 | 2.54E-08 | 9.368834349 |
| SLC4A3   | -0.574787683 | 1.84094809 | -5.974069261 | 7.70E-09 | 2.58E-08 | 9.35562416  |
| SNX29    | -0.485930803 | 3.27473792 | -5.973451723 | 7.73E-09 | 2.59E-08 | 9.352388686 |
| TM4SF1   | 1.073388342  | 6.50830333 | 5.973201278  | 7.74E-09 | 2.59E-08 | 9.3510766   |
| CES2     | -0.426303879 | 5.64284436 | -5.971266564 | 7.82E-09 | 2.61E-08 | 9.340941992 |
| EFR3B    | -0.638143626 | 2.91934774 | -5.970483081 | 7.85E-09 | 2.63E-08 | 9.336838582 |
| TMC6     | 0.772400758  | 4.70283214 | 5.97016518   | 7.87E-09 | 2.63E-08 | 9.335173723 |
| RASGRF   | 0.917655835  | 1.5207241  | 5.969015636  | 7.92E-09 | 2.65E-08 | 9.32915408  |
| MAF1     | -0.295036977 | 7.25265095 | -5.968809648 | 7.92E-09 | 2.65E-08 | 9.32807551  |
| MOSPD3   | -0.373883596 | 4.75237885 | -5.967788243 | 7.97E-09 | 2.66E-08 | 9.322727746 |
| AKAP1    | -0.546246134 | 5.7099274  | -5.965206897 | 8.08E-09 | 2.70E-08 | 9.30921569  |

|          |              |            |              |          |          |             |
|----------|--------------|------------|--------------|----------|----------|-------------|
| ZNF789   | -0.366868471 | 2.40608585 | -5.963282421 | 8.16E-09 | 2.73E-08 | 9.299144895 |
| CDH22    | 0.810828759  | 1.49242024 | 5.962621792  | 8.19E-09 | 2.73E-08 | 9.295688384 |
| B4GALT4  | -0.375267628 | 3.66412413 | -5.961234364 | 8.25E-09 | 2.75E-08 | 9.288430093 |
| NSRP1    | -0.405474098 | 4.63920471 | -5.961062426 | 8.26E-09 | 2.76E-08 | 9.28753069  |
| SPATA6   | -0.407066648 | 3.48099462 | -5.961029619 | 8.26E-09 | 2.76E-08 | 9.287359081 |
| CERK     | -0.531819121 | 5.2099331  | -5.95782748  | 8.41E-09 | 2.80E-08 | 9.270612484 |
| RNF130   | -0.292990415 | 4.13465141 | -5.957770471 | 8.41E-09 | 2.80E-08 | 9.270314401 |
| P2RY1    | -0.338160816 | 1.12149828 | -5.957530791 | 8.42E-09 | 2.81E-08 | 9.269061199 |
| DHRS9    | 0.742513316  | 1.1956339  | 5.957140336  | 8.44E-09 | 2.81E-08 | 9.267019732 |
| PRKCH    | -0.516923044 | 3.99222714 | -5.955645713 | 8.51E-09 | 2.83E-08 | 9.259206137 |
| EIF4G3   | -0.464037751 | 5.31433336 | -5.954000233 | 8.58E-09 | 2.86E-08 | 9.250605609 |
| INO80B-1 | -0.065685916 | 0.08791418 | -5.953883713 | 8.59E-09 | 2.86E-08 | 9.249996653 |
| TMEM21   | -0.375761939 | 6.30646882 | -5.951509497 | 8.70E-09 | 2.90E-08 | 9.23759054  |
| CTNNA2   | -0.19553291  | 0.16049958 | -5.950127877 | 8.76E-09 | 2.92E-08 | 9.230372811 |
| PAPOLG   | -0.504421187 | 3.63731771 | -5.94997271  | 8.77E-09 | 2.92E-08 | 9.229562283 |
| ZDHHC6   | -0.301447049 | 4.81447664 | -5.94981568  | 8.78E-09 | 2.92E-08 | 9.22874204  |
| LSM6     | -0.324088664 | 3.54977307 | -5.949718346 | 8.78E-09 | 2.92E-08 | 9.228233626 |
| ARIH2    | -0.391305266 | 4.81592069 | -5.949617642 | 8.79E-09 | 2.92E-08 | 9.227707611 |
| C16orf70 | -0.352611977 | 2.91043389 | -5.948497131 | 8.84E-09 | 2.94E-08 | 9.221855254 |
| STXBP3   | -0.383828269 | 4.74973558 | -5.946749678 | 8.92E-09 | 2.97E-08 | 9.212730081 |
| SNRNP4   | -0.363144257 | 2.81384016 | -5.945346602 | 8.99E-09 | 2.99E-08 | 9.205404711 |
| PNPT1    | -0.392486543 | 3.90331535 | -5.944895915 | 9.01E-09 | 3.00E-08 | 9.20305198  |
| HIST1H2  | -0.546910132 | 1.10704882 | -5.944190178 | 9.04E-09 | 3.01E-08 | 9.199368076 |
| CRYBB3   | -0.532346063 | 1.48381974 | -5.944047867 | 9.05E-09 | 3.01E-08 | 9.198625263 |
| PPP1R11  | 1.119439175  | 2.16641789 | 5.943996772  | 9.05E-09 | 3.01E-08 | 9.198358565 |
| CREBL2   | -0.412248525 | 6.56768579 | -5.943826435 | 9.06E-09 | 3.01E-08 | 9.197469492 |
| BAIAP3   | 1.028744207  | 2.81677923 | 5.943751924  | 9.07E-09 | 3.01E-08 | 9.197080582 |
| LAD1     | 0.844805652  | 5.03365822 | 5.941088891  | 9.20E-09 | 3.05E-08 | 9.183183471 |
| TYW1     | -0.369322973 | 4.18721035 | -5.940855098 | 9.21E-09 | 3.06E-08 | 9.181963641 |
| METAP2   | -0.377221842 | 5.59363559 | -5.93899384  | 9.30E-09 | 3.09E-08 | 9.1722537   |
| GIMAP5   | -0.337932043 | 0.94439092 | -5.938138899 | 9.34E-09 | 3.10E-08 | 9.167794358 |
| HAT1     | -0.441847849 | 4.13523792 | -5.937673719 | 9.37E-09 | 3.11E-08 | 9.165368198 |
| SPTBN1   | -0.568692047 | 5.829657   | -5.936504623 | 9.43E-09 | 3.13E-08 | 9.15927138  |
| PTEN     | -0.354208116 | 4.7474603  | -5.934969667 | 9.50E-09 | 3.15E-08 | 9.151267989 |
| IGIP     | -0.402232636 | 4.57923826 | -5.933675786 | 9.57E-09 | 3.17E-08 | 9.144522804 |
| THSD1    | -0.478044228 | 2.52987646 | -5.933412614 | 9.58E-09 | 3.18E-08 | 9.143150983 |
| IFT57    | -0.460760127 | 5.91671056 | -5.933061515 | 9.60E-09 | 3.18E-08 | 9.141320911 |
| CFL1     | -0.331100023 | 8.1830214  | -5.93205114  | 9.65E-09 | 3.20E-08 | 9.136054867 |
| C20orf20 | -0.254994973 | 0.66933959 | -5.931255243 | 9.69E-09 | 3.21E-08 | 9.131907151 |
| TMEM24   | -0.589967724 | 6.05809198 | -5.930672582 | 9.72E-09 | 3.22E-08 | 9.128870957 |

|         |              |            |              |          |          |             |
|---------|--------------|------------|--------------|----------|----------|-------------|
| HNRNP1  | -0.386362481 | 6.3043865  | -5.930622539 | 9.73E-09 | 3.22E-08 | 9.128610199 |
| BAMBI   | -0.712533721 | 1.62028145 | -5.93007775  | 9.76E-09 | 3.23E-08 | 9.125771575 |
| RETREG  | -0.447523383 | 3.90790708 | -5.929133391 | 9.80E-09 | 3.25E-08 | 9.12085146  |
| LIMCH1  | -0.561952225 | 4.76252675 | -5.929052655 | 9.81E-09 | 3.25E-08 | 9.120430853 |
| GOLGA8  | -0.157829083 | 0.1998086  | -5.928824831 | 9.82E-09 | 3.25E-08 | 9.119243988 |
| IGFBP6  | 1.581912977  | 7.31181775 | 5.928345324  | 9.85E-09 | 3.26E-08 | 9.11674608  |
| FMNL1   | 0.609672403  | 3.16952833 | 5.928200609  | 9.85E-09 | 3.26E-08 | 9.115992242 |
| CMSS1   | -0.304728599 | 3.41750722 | -5.925769576 | 9.98E-09 | 3.30E-08 | 9.10333079  |
| LNK1    | -0.578696594 | 4.10942596 | -5.924850738 | 1.00E-08 | 3.32E-08 | 9.098546265 |
| ALDH1L1 | -0.651913684 | 0.75294309 | -5.92429228  | 1.01E-08 | 3.33E-08 | 9.095638566 |
| PIGW    | -0.394576259 | 3.05257422 | -5.924146617 | 1.01E-08 | 3.33E-08 | 9.094880185 |
| NKX2-1  | -0.557520601 | 8.16701774 | -5.922397642 | 1.02E-08 | 3.36E-08 | 9.085775392 |
| SLC25A3 | 0.513140612  | 4.30516047 | 5.922104097  | 1.02E-08 | 3.36E-08 | 9.084247457 |
| MROH6   | 0.795970817  | 2.75691355 | 5.921228376  | 1.02E-08 | 3.38E-08 | 9.079689577 |
| AUNIP   | -0.206406135 | 0.89942391 | -5.921177893 | 1.02E-08 | 3.38E-08 | 9.079426842 |
| ZHX1    | -0.50645415  | 4.76056667 | -5.919445187 | 1.03E-08 | 3.41E-08 | 9.070410159 |
| INPP1   | -0.299876427 | 4.55050788 | -5.918187883 | 1.04E-08 | 3.43E-08 | 9.063868637 |
| FCGR2A  | 0.731709344  | 3.06176288 | 5.918123336  | 1.04E-08 | 3.43E-08 | 9.063532839 |
| FAM20C  | 0.701769024  | 5.05919859 | 5.917000156  | 1.05E-08 | 3.45E-08 | 9.057690073 |
| STARD4  | -0.467704856 | 2.44300918 | -5.916777561 | 1.05E-08 | 3.46E-08 | 9.056532241 |
| PCLO    | -0.40433715  | 1.39680485 | -5.916067424 | 1.05E-08 | 3.47E-08 | 9.052838656 |
| KLHDC2  | -0.475954907 | 4.77238587 | -5.914928026 | 1.06E-08 | 3.49E-08 | 9.046913098 |
| EIF2AK3 | -0.548058792 | 4.16546111 | -5.913731477 | 1.06E-08 | 3.51E-08 | 9.040691247 |
| TTC36   | -0.375115602 | 0.90380129 | -5.913145225 | 1.07E-08 | 3.52E-08 | 9.037643189 |
| NIPIB9  | -0.146723174 | 0.2270362  | -5.911904871 | 1.08E-08 | 3.54E-08 | 9.031195054 |
| RASL12  | -0.595633297 | 2.93517338 | -5.911706958 | 1.08E-08 | 3.55E-08 | 9.030166272 |
| LYAR    | -0.311038111 | 3.59864276 | -5.908600782 | 1.09E-08 | 3.61E-08 | 9.01402335  |
| GPR150  | 0.208288947  | 0.41558036 | 5.908058249  | 1.10E-08 | 3.62E-08 | 9.011204444 |
| PRMT6   | -0.432991564 | 4.23559698 | -5.90688048  | 1.10E-08 | 3.64E-08 | 9.005085639 |
| FHAD1   | -0.458548272 | 1.01104435 | -5.906868682 | 1.10E-08 | 3.64E-08 | 9.005024351 |
| NUPR2   | -1.047854523 | 4.10021518 | -5.905516827 | 1.11E-08 | 3.66E-08 | 8.998002278 |
| SEC22C  | -0.363815604 | 4.03696341 | -5.905144406 | 1.11E-08 | 3.67E-08 | 8.996067988 |
| FRAT1   | -0.363111456 | 2.91088737 | -5.905056946 | 1.12E-08 | 3.67E-08 | 8.99561375  |
| FAM107A | -0.89683254  | 5.0204083  | -5.904609091 | 1.12E-08 | 3.68E-08 | 8.993287822 |
| PIH1D3  | -0.110971176 | 0.10818951 | -5.902720499 | 1.13E-08 | 3.72E-08 | 8.983480911 |
| KEAP1   | -0.322401783 | 6.15451122 | -5.902108566 | 1.13E-08 | 3.73E-08 | 8.980303834 |
| TCEAL2  | -1.456359727 | 3.7720442  | -5.900683936 | 1.14E-08 | 3.76E-08 | 8.972908305 |
| LRRC4C  | -0.56467953  | 1.09709309 | -5.900566865 | 1.14E-08 | 3.76E-08 | 8.972300629 |
| SLC35F2 | 0.660028333  | 4.61977306 | 5.899471741  | 1.15E-08 | 3.78E-08 | 8.966616633 |
| ABCD4   | -0.394802953 | 4.08955637 | -5.899043912 | 1.15E-08 | 3.79E-08 | 8.964396303 |

|         |              |            |              |          |          |             |
|---------|--------------|------------|--------------|----------|----------|-------------|
| TPRA1   | -0.314089003 | 5.19692136 | -5.8982369   | 1.16E-08 | 3.80E-08 | 8.960208433 |
| TMEM18  | -0.302962965 | 2.50385074 | -5.897866822 | 1.16E-08 | 3.81E-08 | 8.958288113 |
| APPBP2  | -0.429972277 | 3.79245561 | -5.897572335 | 1.16E-08 | 3.81E-08 | 8.956760097 |
| MINDY3  | -0.357397157 | 4.1278473  | -5.897299565 | 1.16E-08 | 3.82E-08 | 8.955344819 |
| SIM2    | -0.32559164  | 0.6118661  | -5.89650658  | 1.17E-08 | 3.83E-08 | 8.951230664 |
| MAGI3   | -0.624943114 | 4.09528297 | -5.895883971 | 1.17E-08 | 3.85E-08 | 8.948000743 |
| DCUN1D  | -0.384346144 | 3.71674935 | -5.895618343 | 1.17E-08 | 3.85E-08 | 8.946622819 |
| RPS7    | -0.363141956 | 7.68656484 | -5.895432745 | 1.17E-08 | 3.85E-08 | 8.945660072 |
| TREX2   | -0.307454735 | 0.66501908 | -5.895213291 | 1.18E-08 | 3.86E-08 | 8.944521734 |
| FUZ     | -0.376026695 | 4.74575685 | -5.895189529 | 1.18E-08 | 3.86E-08 | 8.944398479 |
| CLDN1   | 1.519946033  | 7.49517375 | 5.895175478  | 1.18E-08 | 3.86E-08 | 8.944325595 |
| PFDN1   | -0.27587809  | 6.59846321 | -5.893271523 | 1.19E-08 | 3.90E-08 | 8.934450927 |
| BBS5    | -0.408246166 | 3.23261578 | -5.892273569 | 1.19E-08 | 3.92E-08 | 8.929276106 |
| POLR2I  | -0.38170692  | 6.23567633 | -5.892016751 | 1.20E-08 | 3.92E-08 | 8.927944503 |
| ANKRD7  | -0.317412873 | 0.75715322 | -5.89166667  | 1.20E-08 | 3.93E-08 | 8.926129402 |
| PRKCSH  | -0.337764434 | 7.73665008 | -5.890842313 | 1.20E-08 | 3.94E-08 | 8.921855596 |
| PIGN    | -0.435339423 | 3.29693767 | -5.889790129 | 1.21E-08 | 3.96E-08 | 8.9164013   |
| DHX57   | -0.347184928 | 3.23689824 | -5.88960228  | 1.21E-08 | 3.97E-08 | 8.915427607 |
| JPT2    | -0.388591829 | 5.67032345 | -5.887765865 | 1.22E-08 | 4.01E-08 | 8.905910035 |
| FHOD3   | -0.663515221 | 1.79591279 | -5.887635701 | 1.22E-08 | 4.01E-08 | 8.90523552  |
| LYST    | 0.541678291  | 3.08835664 | 5.887354225  | 1.23E-08 | 4.01E-08 | 8.903776944 |
| PEX10   | -0.371346366 | 4.10584492 | -5.887338663 | 1.23E-08 | 4.01E-08 | 8.903696302 |
| TTLL13P | -0.092904362 | 0.19040713 | -5.886553882 | 1.23E-08 | 4.03E-08 | 8.899629935 |
| ZNF596  | -0.380537627 | 2.0088864  | -5.886307632 | 1.23E-08 | 4.03E-08 | 8.898354069 |
| PHAX    | -0.359602165 | 4.56463346 | -5.885958867 | 1.23E-08 | 4.04E-08 | 8.896547126 |
| PTPRN2  | -0.6468754   | 4.28739772 | -5.885840895 | 1.24E-08 | 4.04E-08 | 8.895935933 |
| TMEM25  | -0.396382135 | 2.26421434 | -5.885745273 | 1.24E-08 | 4.04E-08 | 8.895440535 |
| DCLRE1  | -0.382434528 | 3.22642759 | -5.881861717 | 1.26E-08 | 4.13E-08 | 8.875325954 |
| DIRAS1  | 0.671939962  | 1.2772579  | 5.880272157  | 1.27E-08 | 4.16E-08 | 8.867095861 |
| FDXACB  | -0.250449027 | 1.61533115 | -5.879945238 | 1.27E-08 | 4.17E-08 | 8.865403415 |
| REXO4   | -0.328778651 | 5.19596817 | -5.879164525 | 1.28E-08 | 4.18E-08 | 8.861361991 |
| HNRNPf  | -0.379920872 | 7.12199902 | -5.879004441 | 1.28E-08 | 4.19E-08 | 8.860533358 |
| STK11   | -0.338222808 | 4.6030651  | -5.878967501 | 1.28E-08 | 4.19E-08 | 8.860342148 |
| LIN7A   | -0.627971723 | 1.72801101 | -5.878345636 | 1.29E-08 | 4.20E-08 | 8.857123389 |
| RND3    | 0.793769281  | 3.41496247 | 5.877514753  | 1.29E-08 | 4.22E-08 | 8.852823161 |
| THYN1   | -0.318690872 | 6.46098018 | -5.877496121 | 1.29E-08 | 4.22E-08 | 8.85272674  |
| TMEM8B  | -0.424895192 | 4.61428641 | -5.877435424 | 1.29E-08 | 4.22E-08 | 8.852412619 |
| MEIS2   | -0.441526603 | 1.21895044 | -5.877181917 | 1.29E-08 | 4.22E-08 | 8.851100704 |
| CHMP2B  | -0.430917876 | 6.03435261 | -5.876653265 | 1.30E-08 | 4.23E-08 | 8.848365032 |
| TBCCD1  | -0.405557781 | 3.53336596 | -5.876622558 | 1.30E-08 | 4.23E-08 | 8.848206131 |

|         |              |            |              |          |          |             |
|---------|--------------|------------|--------------|----------|----------|-------------|
| ZNF521  | -0.636906133 | 2.33829672 | -5.876580826 | 1.30E-08 | 4.23E-08 | 8.847990188 |
| ARF3    | -0.344354804 | 7.36577945 | -5.876247326 | 1.30E-08 | 4.24E-08 | 8.8462645   |
| FOLR1   | -0.931993698 | 5.43659677 | -5.875131916 | 1.31E-08 | 4.26E-08 | 8.840493379 |
| TBC1D17 | -0.343129759 | 5.47286685 | -5.873910668 | 1.32E-08 | 4.29E-08 | 8.834175616 |
| FSD2    | -0.236165627 | 0.30698057 | -5.873773058 | 1.32E-08 | 4.29E-08 | 8.833463796 |
| SMARCC1 | -0.344670373 | 6.03977673 | -5.871790812 | 1.33E-08 | 4.34E-08 | 8.823211541 |
| SERF1A  | -0.134298314 | 0.41411191 | -5.871069196 | 1.34E-08 | 4.35E-08 | 8.819479971 |
| PRSS22  | 0.785039049  | 3.79875695 | 5.870970805  | 1.34E-08 | 4.36E-08 | 8.818971205 |
| CASTOR  | -0.421187946 | 2.46376492 | -5.870714253 | 1.34E-08 | 4.36E-08 | 8.817644643 |
| CCL7    | 0.384564087  | 0.49771197 | 5.870001172  | 1.34E-08 | 4.38E-08 | 8.813957722 |
| ALKBH1  | -0.338609376 | 3.74654136 | -5.86997222  | 1.34E-08 | 4.38E-08 | 8.813808034 |
| PTTG1   | -0.765073158 | 5.62716319 | -5.868762159 | 1.35E-08 | 4.40E-08 | 8.807552326 |
| MYLK4   | -0.260170143 | 0.86695809 | -5.86861224  | 1.35E-08 | 4.41E-08 | 8.80677735  |
| NAA10   | -0.348656152 | 4.25536555 | -5.868239365 | 1.36E-08 | 4.41E-08 | 8.804849916 |
| PRKCA   | -0.579151655 | 1.87840782 | -5.866691314 | 1.37E-08 | 4.45E-08 | 8.796848863 |
| LRRC61  | -0.449929955 | 4.64414568 | -5.866302643 | 1.37E-08 | 4.46E-08 | 8.794840282 |
| SEC63   | -0.472670269 | 5.93779064 | -5.865731817 | 1.37E-08 | 4.47E-08 | 8.791890537 |
| RERG    | -0.457325168 | 1.47637049 | -5.865208735 | 1.38E-08 | 4.48E-08 | 8.789187705 |
| DNAI2   | -0.13807082  | 0.15851675 | -5.864417442 | 1.38E-08 | 4.50E-08 | 8.785099339 |
| MROH7   | -0.385182377 | 0.81172244 | -5.862243541 | 1.40E-08 | 4.55E-08 | 8.773869632 |
| GPBP1   | -0.34622808  | 5.63532332 | -5.860625824 | 1.41E-08 | 4.59E-08 | 8.765515064 |
| LILRB3  | 0.332807419  | 0.93749431 | 5.859236211  | 1.42E-08 | 4.62E-08 | 8.75833992  |
| CPNE2   | -0.415493177 | 4.10396531 | -5.857835377 | 1.43E-08 | 4.66E-08 | 8.751108152 |
| CSF2RA  | 0.637253692  | 1.98420502 | 5.857264111  | 1.44E-08 | 4.67E-08 | 8.748159384 |
| SSC4D   | -0.90015575  | 2.10832222 | -5.856302191 | 1.45E-08 | 4.69E-08 | 8.743194634 |
| UBR7    | -0.336327805 | 5.04099012 | -5.853720033 | 1.47E-08 | 4.76E-08 | 8.72987043  |
| E2F6    | -0.354756439 | 3.15335466 | -5.85321208  | 1.47E-08 | 4.77E-08 | 8.727249865 |
| ALAD    | -0.42080914  | 5.44299588 | -5.853019097 | 1.47E-08 | 4.77E-08 | 8.7262543   |
| SIAH1   | -0.289399785 | 2.94525328 | -5.852909361 | 1.47E-08 | 4.78E-08 | 8.725688204 |
| ORC2    | -0.365129734 | 3.66039034 | -5.852735868 | 1.47E-08 | 4.78E-08 | 8.724793213 |
| PSPN    | -0.316127893 | 2.38277052 | -5.850808347 | 1.49E-08 | 4.83E-08 | 8.714851207 |
| PPP6R2  | -0.337343841 | 5.34060173 | -5.850644448 | 1.49E-08 | 4.83E-08 | 8.71400594  |
| CXCL14  | 2.297829758  | 5.59465121 | 5.850562682  | 1.49E-08 | 4.83E-08 | 8.713584264 |
| SIK3    | -0.418307627 | 4.17088267 | -5.850227979 | 1.49E-08 | 4.84E-08 | 8.711858201 |
| FERMT1  | -0.695057102 | 1.51363575 | -5.846169303 | 1.53E-08 | 4.94E-08 | 8.690933611 |
| EPB41L4 | -0.572793956 | 4.76796959 | -5.845763843 | 1.53E-08 | 4.95E-08 | 8.68884386  |
| MORF4L  | -0.421804852 | 6.7553382  | -5.845255893 | 1.53E-08 | 4.97E-08 | 8.686226034 |
| COMMD1  | -0.312416259 | 4.61536204 | -5.8426403   | 1.55E-08 | 5.03E-08 | 8.67274877  |
| FLYWCH1 | -0.354225453 | 3.93484721 | -5.842179092 | 1.56E-08 | 5.04E-08 | 8.670372803 |
| SLC16A6 | -0.516494816 | 1.89463263 | -5.842015389 | 1.56E-08 | 5.05E-08 | 8.669529497 |

|         |              |            |              |          |          |             |
|---------|--------------|------------|--------------|----------|----------|-------------|
| MEGF8   | -0.431957297 | 4.5570402  | -5.841456768 | 1.56E-08 | 5.06E-08 | 8.666651949 |
| TMEM35  | -0.544874397 | 4.87205946 | -5.840101392 | 1.58E-08 | 5.10E-08 | 8.659671048 |
| SCN4A   | -0.787904445 | 2.560855   | -5.838645113 | 1.59E-08 | 5.14E-08 | 8.652171825 |
| ATF2    | -0.428315454 | 4.91456256 | -5.838081885 | 1.59E-08 | 5.15E-08 | 8.649271823 |
| SLC16A1 | -0.503782818 | 3.27878129 | -5.837603212 | 1.60E-08 | 5.16E-08 | 8.646807351 |
| ADAM8   | 0.608469001  | 2.18550951 | 5.837121977  | 1.60E-08 | 5.17E-08 | 8.644329844 |
| GPM6B   | -0.479822603 | 1.93397374 | -5.837021441 | 1.60E-08 | 5.18E-08 | 8.643812286 |
| PIANP   | 0.749549767  | 1.60774027 | 5.836989597  | 1.60E-08 | 5.18E-08 | 8.64364835  |
| PPARD   | -0.414311184 | 6.17546517 | -5.83556772  | 1.61E-08 | 5.21E-08 | 8.63632925  |
| DNAJC2  | -0.38070056  | 2.23927106 | -5.835031265 | 1.62E-08 | 5.23E-08 | 8.633568205 |
| C3orf14 | -0.287222514 | 2.20906614 | -5.833832308 | 1.63E-08 | 5.26E-08 | 8.627398076 |
| LIN7C   | -0.383393142 | 4.8219879  | -5.833819922 | 1.63E-08 | 5.26E-08 | 8.627334338 |
| TSEN34  | -0.364368518 | 5.70371071 | -5.833484744 | 1.63E-08 | 5.27E-08 | 8.625609605 |
| TATDN1  | -0.358573335 | 3.92314829 | -5.8332936   | 1.63E-08 | 5.27E-08 | 8.624626062 |
| UBL4A   | -0.355446468 | 5.95519722 | -5.832988609 | 1.64E-08 | 5.28E-08 | 8.623056769 |
| ACTR3C  | -0.262864184 | 1.20149424 | -5.832488044 | 1.64E-08 | 5.29E-08 | 8.620481313 |
| HOOK2   | -0.461206777 | 4.8895744  | -5.831676469 | 1.65E-08 | 5.32E-08 | 8.616306032 |
| RNF212  | -0.792236865 | 2.08903791 | -5.830936366 | 1.65E-08 | 5.33E-08 | 8.612498836 |
| ANKK1   | -0.37909034  | 0.57911944 | -5.829935137 | 1.66E-08 | 5.36E-08 | 8.607348963 |
| LCMT2   | -0.347854691 | 2.9613744  | -5.826718092 | 1.69E-08 | 5.45E-08 | 8.590806496 |
| RAF1    | -0.365318552 | 5.48767265 | -5.825223666 | 1.70E-08 | 5.50E-08 | 8.583124337 |
| DLAT    | -0.443754255 | 4.8742496  | -5.824479225 | 1.71E-08 | 5.52E-08 | 8.579298072 |
| BCAT1   | 0.760022187  | 2.14046288 | 5.823662953  | 1.72E-08 | 5.54E-08 | 8.575103041 |
| SKP2    | -0.37181796  | 2.69015477 | -5.823658079 | 1.72E-08 | 5.54E-08 | 8.575077992 |
| PRIMPOI | -0.355736821 | 3.44646625 | -5.822846443 | 1.73E-08 | 5.56E-08 | 8.570907235 |
| POT1    | -0.376803182 | 3.68056884 | -5.822152342 | 1.73E-08 | 5.58E-08 | 8.567340805 |
| PAQR6   | 0.679294491  | 2.3640246  | 5.821445933  | 1.74E-08 | 5.60E-08 | 8.563711472 |
| PLEC    | 0.431688349  | 5.49340697 | 5.821227563  | 1.74E-08 | 5.61E-08 | 8.562589616 |
| IL2RB   | 0.883817915  | 2.7595578  | 5.821095132  | 1.74E-08 | 5.61E-08 | 8.561909278 |
| FBXO33  | -0.403259414 | 4.3577273  | -5.820722838 | 1.75E-08 | 5.62E-08 | 8.55999676  |
| AXDND1  | -0.10997873  | 0.20192285 | -5.820687916 | 1.75E-08 | 5.62E-08 | 8.559817365 |
| APOBR   | 0.666239721  | 2.55500332 | 5.818048225  | 1.77E-08 | 5.70E-08 | 8.546259695 |
| STIM1   | -0.503109028 | 5.90175558 | -5.817987927 | 1.77E-08 | 5.70E-08 | 8.545950055 |
| ZNRD1   | -0.349861036 | 3.62238494 | -5.81731803  | 1.78E-08 | 5.72E-08 | 8.542510184 |
| RAB11B  | -0.364223515 | 8.12884525 | -5.814959639 | 1.80E-08 | 5.79E-08 | 8.53040244  |
| SLU7    | -0.358384091 | 5.40538199 | -5.814633364 | 1.80E-08 | 5.80E-08 | 8.528727673 |
| NDUFA1  | -0.457867947 | 5.06899127 | -5.814267326 | 1.81E-08 | 5.81E-08 | 8.526848887 |
| GABPA   | -0.444591035 | 4.35257572 | -5.812853124 | 1.82E-08 | 5.85E-08 | 8.519590983 |
| PANK2   | -0.336144227 | 4.03611497 | -5.812312013 | 1.82E-08 | 5.86E-08 | 8.516814273 |
| CTSE    | 1.444451013  | 3.70292606 | 5.811987693  | 1.83E-08 | 5.87E-08 | 8.515150122 |



|          |              |            |              |          |          |             |
|----------|--------------|------------|--------------|----------|----------|-------------|
| GHDC     | -0.55797337  | 5.86426877 | -5.811422514 | 1.83E-08 | 5.89E-08 | 8.512250242 |
| GNPTG    | -0.317441356 | 6.0634266  | -5.810956977 | 1.84E-08 | 5.90E-08 | 8.509861778 |
| MRPL23   | -0.421176227 | 4.95554456 | -5.810737591 | 1.84E-08 | 5.91E-08 | 8.508736261 |
| TMEM45   | -0.555612592 | 1.76657836 | -5.809868427 | 1.85E-08 | 5.93E-08 | 8.504277486 |
| MYLIP    | -0.608168864 | 6.31061967 | -5.808637123 | 1.86E-08 | 5.97E-08 | 8.497961828 |
| GTPBP8   | -0.326751534 | 3.32916828 | -5.807976093 | 1.87E-08 | 5.99E-08 | 8.494571671 |
| CAMK1    | -0.540862482 | 3.24787546 | -5.807655938 | 1.87E-08 | 6.00E-08 | 8.492929827 |
| C16orf72 | -0.3653811   | 3.45878011 | -5.807505414 | 1.87E-08 | 6.00E-08 | 8.492157922 |
| FSCN1    | -0.564194972 | 5.13967899 | -5.807198879 | 1.87E-08 | 6.01E-08 | 8.490586023 |
| TTC39B   | 0.586686956  | 3.12873719 | 5.806389587  | 1.88E-08 | 6.04E-08 | 8.486436316 |
| C8G      | -0.408591426 | 1.4564918  | -5.805373987 | 1.89E-08 | 6.07E-08 | 8.481229369 |
| SSR4     | -0.429366196 | 6.95059467 | -5.80530812  | 1.89E-08 | 6.07E-08 | 8.480891698 |
| RFNG     | -0.324861527 | 5.13825869 | -5.803898161 | 1.91E-08 | 6.11E-08 | 8.47366411  |
| RCN2     | -0.528030739 | 4.87916403 | -5.803273367 | 1.91E-08 | 6.13E-08 | 8.470461786 |
| PPP3R1   | -0.334413288 | 5.20703026 | -5.802379515 | 1.92E-08 | 6.16E-08 | 8.465880888 |
| ZNF185   | -0.57898189  | 5.05964413 | -5.801926418 | 1.93E-08 | 6.17E-08 | 8.463559019 |
| PHF23    | -0.369352687 | 5.79865303 | -5.801841573 | 1.93E-08 | 6.18E-08 | 8.463124252 |
| PTGES3   | -0.073576319 | 0.08818087 | -5.801497831 | 1.93E-08 | 6.19E-08 | 8.461362877 |
| ZFP1     | -0.384702757 | 3.6456483  | -5.801394895 | 1.93E-08 | 6.19E-08 | 8.460835441 |
| ANO3     | -0.277370993 | 0.62797034 | -5.801090574 | 1.94E-08 | 6.20E-08 | 8.459276153 |
| EDARAD   | -0.657776246 | 1.74735764 | -5.800833387 | 1.94E-08 | 6.20E-08 | 8.457958421 |
| ZNF780A  | -0.364613307 | 2.81158889 | -5.800182826 | 1.95E-08 | 6.22E-08 | 8.454625386 |
| REM1     | -0.613420284 | 2.01845898 | -5.799970472 | 1.95E-08 | 6.23E-08 | 8.453537488 |
| C2CD5    | -0.428368118 | 4.41680871 | -5.799144587 | 1.96E-08 | 6.26E-08 | 8.449306741 |
| PTCD1    | -0.235305225 | 2.13662775 | -5.798766515 | 1.96E-08 | 6.27E-08 | 8.447370157 |
| TM4SF4   | 1.19043986   | 1.99843678 | 5.798002706  | 1.97E-08 | 6.29E-08 | 8.443458012 |
| AGPAT5   | -0.50570414  | 3.88569524 | -5.797527252 | 1.97E-08 | 6.31E-08 | 8.441022988 |
| LRRTM1   | -0.859110288 | 0.96827608 | -5.797259418 | 1.98E-08 | 6.31E-08 | 8.439651353 |
| PPME1    | -0.34090868  | 4.58635009 | -5.797025877 | 1.98E-08 | 6.32E-08 | 8.438455381 |
| ODF3L2   | -0.143403944 | 0.26099688 | -5.796471313 | 1.98E-08 | 6.34E-08 | 8.435615581 |
| PRKAR2   | -0.464696361 | 4.75304857 | -5.795803657 | 1.99E-08 | 6.36E-08 | 8.432196941 |
| SNX12    | -0.389424277 | 6.2636646  | -5.794876959 | 2.00E-08 | 6.39E-08 | 8.427452408 |
| MCIDAS   | -0.405684463 | 1.69828805 | -5.794801531 | 2.00E-08 | 6.39E-08 | 8.427066254 |
| RIPOR1   | -0.397461902 | 4.75861144 | -5.794790753 | 2.00E-08 | 6.39E-08 | 8.427011078 |
| DPP4     | 1.542442634  | 5.38791353 | 5.794416631  | 2.01E-08 | 6.40E-08 | 8.425095828 |
| DECR2    | -0.412963862 | 3.06038534 | -5.793674111 | 2.01E-08 | 6.42E-08 | 8.421294909 |
| TCTN3    | -0.658995241 | 7.06337111 | -5.792794405 | 2.02E-08 | 6.45E-08 | 8.416792221 |
| C1orf35  | -0.394414929 | 3.92654029 | -5.791102236 | 2.04E-08 | 6.51E-08 | 8.408132508 |
| SLC12A4  | -0.431957572 | 4.97717631 | -5.790278887 | 2.05E-08 | 6.54E-08 | 8.4039197   |
| SLC51A   | -0.282671373 | 1.37705618 | -5.789765297 | 2.05E-08 | 6.55E-08 | 8.401292061 |

|         |              |            |              |          |          |             |
|---------|--------------|------------|--------------|----------|----------|-------------|
| ZNF436  | -0.522890743 | 4.47071258 | -5.789548388 | 2.06E-08 | 6.56E-08 | 8.400182363 |
| TMC3    | -0.484230394 | 0.8015244  | -5.789454784 | 2.06E-08 | 6.56E-08 | 8.399703493 |
| RNF141  | -0.424992328 | 4.2330585  | -5.789010435 | 2.06E-08 | 6.57E-08 | 8.397430348 |
| PTPRB   | -0.571308016 | 3.42687309 | -5.788697806 | 2.07E-08 | 6.58E-08 | 8.395831118 |
| USO1    | -0.51849236  | 6.11671246 | -5.787550647 | 2.08E-08 | 6.62E-08 | 8.389963479 |
| MRPL41  | -0.466319739 | 6.21371368 | -5.787458351 | 2.08E-08 | 6.62E-08 | 8.389491428 |
| STRBP   | -0.363168782 | 4.28159018 | -5.787385119 | 2.08E-08 | 6.63E-08 | 8.389116886 |
| TEX14   | -0.084375373 | 0.20463747 | -5.787371965 | 2.08E-08 | 6.63E-08 | 8.389049611 |
| ATF4    | -0.377811697 | 8.01632448 | -5.786107085 | 2.09E-08 | 6.67E-08 | 8.382581025 |
| MAJIN   | -0.252601566 | 0.37558503 | -5.784750652 | 2.11E-08 | 6.71E-08 | 8.375645446 |
| SLC1A5  | 0.852553256  | 4.48172881 | 5.784670885  | 2.11E-08 | 6.72E-08 | 8.375237625 |
| TCF4    | -0.479063532 | 3.05672605 | -5.784401953 | 2.11E-08 | 6.72E-08 | 8.373862711 |
| GAS2    | -0.235221203 | 0.75785496 | -5.783480095 | 2.12E-08 | 6.76E-08 | 8.369150092 |
| CTBP2   | -0.506578157 | 4.99402418 | -5.78311431  | 2.13E-08 | 6.77E-08 | 8.367280322 |
| PLD1    | -0.335913791 | 1.44000393 | -5.783021306 | 2.13E-08 | 6.77E-08 | 8.366804935 |
| ABITRAM | -0.357871183 | 4.69195858 | -5.781973084 | 2.14E-08 | 6.81E-08 | 8.361447351 |
| NRG2    | -0.250685041 | 0.43644483 | -5.780898689 | 2.15E-08 | 6.84E-08 | 8.355956771 |
| SLIT3   | -0.811395354 | 4.85090142 | -5.780630209 | 2.16E-08 | 6.85E-08 | 8.354584858 |
| ARHGAP  | 0.638815596  | 4.1598369  | 5.780536927  | 2.16E-08 | 6.85E-08 | 8.354108206 |
| PHYHIP  | 1.012461139  | 3.77573591 | 5.78041914   | 2.16E-08 | 6.86E-08 | 8.353506343 |
| MXI1    | -0.442989415 | 5.45644241 | -5.779935218 | 2.16E-08 | 6.87E-08 | 8.351033724 |
| TAS2R14 | -0.349529979 | 1.4843953  | -5.778802832 | 2.18E-08 | 6.91E-08 | 8.345248381 |
| PDZD4   | -0.421886998 | 1.45154644 | -5.777219168 | 2.19E-08 | 6.97E-08 | 8.337158921 |
| CUL1    | -0.325869045 | 5.89648796 | -5.776897262 | 2.20E-08 | 6.98E-08 | 8.335514812 |
| HECW2   | -0.563989175 | 2.2832169  | -5.776796496 | 2.20E-08 | 6.98E-08 | 8.335000171 |
| RFTN2   | -0.360169243 | 1.34317429 | -5.773587422 | 2.24E-08 | 7.10E-08 | 8.318614156 |
| USP33   | -0.384441234 | 4.6940994  | -5.772695972 | 2.25E-08 | 7.13E-08 | 8.314063521 |
| WARS2   | -0.337654658 | 3.67555967 | -5.77147563  | 2.26E-08 | 7.17E-08 | 8.307834847 |
| PGS1    | -0.36918896  | 4.16814259 | -5.771474075 | 2.26E-08 | 7.17E-08 | 8.307826907 |
| GATAD1  | -0.398331773 | 5.22645618 | -5.769567293 | 2.28E-08 | 7.25E-08 | 8.298096646 |
| STX6    | -0.33584584  | 4.66467792 | -5.769188385 | 2.29E-08 | 7.26E-08 | 8.296163385 |
| UCK2    | -0.398619833 | 2.58955409 | -5.768110306 | 2.30E-08 | 7.30E-08 | 8.290663347 |
| MARK2   | -0.38753092  | 5.06832478 | -5.76792158  | 2.30E-08 | 7.30E-08 | 8.289700602 |
| SULT2B1 | 0.863508209  | 2.64436024 | 5.767245798  | 2.31E-08 | 7.33E-08 | 8.286253452 |
| PRKRA   | -0.30708522  | 4.8532937  | -5.767154705 | 2.31E-08 | 7.33E-08 | 8.285788812 |
| EPCAM   | -0.511908626 | 9.05334811 | -5.766846188 | 2.32E-08 | 7.34E-08 | 8.284215197 |
| CCZ1B   | -0.288547377 | 1.68687341 | -5.76537093  | 2.34E-08 | 7.40E-08 | 8.27669142  |
| CDKN2A  | 0.718156724  | 1.66841899 | 5.765213821  | 2.34E-08 | 7.40E-08 | 8.275890258 |
| ST6GAL1 | -1.077562631 | 4.81002376 | -5.763340453 | 2.36E-08 | 7.47E-08 | 8.266338462 |
| TCAF2   | -0.466097006 | 1.05080586 | -5.762226606 | 2.37E-08 | 7.52E-08 | 8.260660391 |

|         |              |            |              |          |          |             |
|---------|--------------|------------|--------------|----------|----------|-------------|
| ZSCAN3  | -0.874072017 | 3.09581448 | -5.762049446 | 2.38E-08 | 7.52E-08 | 8.259757359 |
| YBX3    | 0.487784426  | 5.57375783 | 5.760908026  | 2.39E-08 | 7.57E-08 | 8.25393974  |
| FAM168E | -0.478633231 | 6.10809176 | -5.760038011 | 2.40E-08 | 7.60E-08 | 8.249506022 |
| DBR1    | -0.37980003  | 3.84889569 | -5.758410131 | 2.42E-08 | 7.66E-08 | 8.241211507 |
| FLNA    | 0.717520563  | 7.54275204 | 5.757959041  | 2.43E-08 | 7.68E-08 | 8.238913391 |
| UBXN11  | -0.487765072 | 4.76362803 | -5.757623644 | 2.43E-08 | 7.69E-08 | 8.237204777 |
| CNTFR   | -1.400154211 | 1.66262993 | -5.757600486 | 2.43E-08 | 7.69E-08 | 8.237086802 |
| SMIM5   | -0.648341894 | 3.66729311 | -5.757262257 | 2.44E-08 | 7.70E-08 | 8.235363844 |
| EPHX3   | 0.585204014  | 1.27823148 | 5.757016128  | 2.44E-08 | 7.71E-08 | 8.234110091 |
| CORO1B  | -0.308293099 | 6.37667271 | -5.757006818 | 2.44E-08 | 7.71E-08 | 8.234062668 |
| IGFL2   | 1.214638018  | 1.91122769 | 5.755479859  | 2.46E-08 | 7.77E-08 | 8.226285476 |
| ARVCF   | -0.474452149 | 4.96502268 | -5.755199012 | 2.46E-08 | 7.78E-08 | 8.224855222 |
| ZP1     | -0.231196744 | 0.2682439  | -5.754931515 | 2.47E-08 | 7.79E-08 | 8.223493005 |
| MT1HL1  | -0.494137226 | 0.48063617 | -5.754025825 | 2.48E-08 | 7.83E-08 | 8.218881183 |
| ANKS1A  | -0.482318277 | 4.25029805 | -5.751667225 | 2.51E-08 | 7.92E-08 | 8.206873679 |
| ZFP64   | -0.362260703 | 2.7800497  | -5.751456246 | 2.51E-08 | 7.93E-08 | 8.205799784 |
| KDM4C   | -0.356217763 | 2.88500049 | -5.750699212 | 2.52E-08 | 7.96E-08 | 8.201946681 |
| ZNF440  | -0.327151857 | 2.14048919 | -5.75041961  | 2.53E-08 | 7.97E-08 | 8.200523674 |
| GDF11   | -0.43996409  | 2.68331472 | -5.75027113  | 2.53E-08 | 7.97E-08 | 8.199768024 |
| EPHB6   | -0.893952926 | 4.72932714 | -5.749522696 | 2.54E-08 | 8.00E-08 | 8.195959296 |
| KLRG1   | -0.32171633  | 1.04307574 | -5.748088463 | 2.56E-08 | 8.06E-08 | 8.188661648 |
| FOXQ1   | 1.331763529  | 4.96828452 | 5.747435729  | 2.57E-08 | 8.09E-08 | 8.185340878 |
| GMEB2   | -0.33319598  | 4.68100608 | -5.746829592 | 2.57E-08 | 8.11E-08 | 8.182257431 |
| VPS72   | -0.310761767 | 4.8127381  | -5.746586696 | 2.58E-08 | 8.12E-08 | 8.181021879 |
| ATE1    | -0.454024427 | 4.33033117 | -5.745582804 | 2.59E-08 | 8.16E-08 | 8.175915748 |
| CCN1    | -0.982510783 | 7.88861069 | -5.745483628 | 2.59E-08 | 8.17E-08 | 8.175411343 |
| PSMG2   | -0.272368917 | 5.52577944 | -5.744272469 | 2.61E-08 | 8.22E-08 | 8.169251982 |
| PITPNA  | -0.384650955 | 6.33767413 | -5.743982761 | 2.61E-08 | 8.23E-08 | 8.167778818 |
| ZNF697  | -0.436297908 | 2.72323868 | -5.743165037 | 2.62E-08 | 8.26E-08 | 8.163621    |
| SPI1    | 0.767701705  | 4.22172522 | 5.742893841  | 2.63E-08 | 8.27E-08 | 8.162242174 |
| ADGRL2  | -0.825353083 | 4.76512972 | -5.742695852 | 2.63E-08 | 8.28E-08 | 8.161235578 |
| OR4D10  | 0.618934718  | 0.8232639  | 5.74167904   | 2.64E-08 | 8.32E-08 | 8.156066442 |
| MARS2   | -0.44915464  | 2.71262879 | -5.741532079 | 2.65E-08 | 8.33E-08 | 8.155319394 |
| BDKRB2  | -0.70503216  | 2.41366887 | -5.740809763 | 2.66E-08 | 8.36E-08 | 8.151647879 |
| RPL23   | -0.343385826 | 8.48242277 | -5.739857006 | 2.67E-08 | 8.40E-08 | 8.146805576 |
| NALCN   | 0.604378505  | 0.99623081 | 5.739658843  | 2.67E-08 | 8.40E-08 | 8.145798513 |
| PROB1   | -0.392017262 | 1.73289936 | -5.739383567 | 2.68E-08 | 8.41E-08 | 8.144399599 |
| ZNF57   | -0.300962537 | 2.50762465 | -5.737772452 | 2.70E-08 | 8.48E-08 | 8.136213187 |
| CTLA4   | 0.708261401  | 1.18061353 | 5.737637487  | 2.70E-08 | 8.49E-08 | 8.13552748  |
| RGS5    | -0.862589743 | 6.32159988 | -5.735917168 | 2.73E-08 | 8.56E-08 | 8.126788294 |

|           |              |            |              |          |          |             |
|-----------|--------------|------------|--------------|----------|----------|-------------|
| CFH       | 1.106462247  | 4.48406572 | 5.734660717  | 2.74E-08 | 8.62E-08 | 8.120406823 |
| GGNBP2    | -0.339016317 | 4.48261567 | -5.733877233 | 2.75E-08 | 8.65E-08 | 8.116428086 |
| EIF4A3    | -0.377160463 | 5.30496121 | -5.733771582 | 2.76E-08 | 8.65E-08 | 8.115891592 |
| NOL12     | -0.346311417 | 2.53976542 | -5.733159623 | 2.77E-08 | 8.68E-08 | 8.112784237 |
| ARHGEF    | -0.659658996 | 2.31199175 | -5.733121144 | 2.77E-08 | 8.68E-08 | 8.11258886  |
| NEURL1    | 0.276354633  | 0.42912344 | 5.732051057  | 2.78E-08 | 8.73E-08 | 8.107155901 |
| LPAR2     | -0.390940202 | 3.88789305 | -5.731044402 | 2.80E-08 | 8.77E-08 | 8.102045712 |
| C1orf74   | -0.309849933 | 1.56133819 | -5.729561487 | 2.82E-08 | 8.84E-08 | 8.094519092 |
| MARS      | -0.359146592 | 5.11609923 | -5.729492306 | 2.82E-08 | 8.84E-08 | 8.094167998 |
| APLN      | -0.844566033 | 2.2213475  | -5.72931511  | 2.82E-08 | 8.85E-08 | 8.093268741 |
| SLC10A3   | -0.40845542  | 5.53375167 | -5.72810885  | 2.84E-08 | 8.90E-08 | 8.087147609 |
| EPYC      | 0.618578673  | 0.45788626 | 5.727533186  | 2.85E-08 | 8.93E-08 | 8.084226771 |
| STYK1     | 0.267873765  | 0.47769384 | 5.727422473  | 2.85E-08 | 8.93E-08 | 8.083665056 |
| ZBTB25    | -0.306739013 | 2.41310313 | -5.727217891 | 2.85E-08 | 8.94E-08 | 8.082627106 |
| DCAKD     | -0.343750947 | 6.3035322  | -5.726740535 | 2.86E-08 | 8.96E-08 | 8.080205346 |
| PPP2CB    | -0.411956951 | 6.45081992 | -5.725787292 | 2.87E-08 | 9.00E-08 | 8.075369738 |
| FAM184A   | -0.61709062  | 2.58252819 | -5.725508685 | 2.88E-08 | 9.01E-08 | 8.073956542 |
| MED22     | -0.392623783 | 4.23662179 | -5.724843912 | 2.89E-08 | 9.04E-08 | 8.070584775 |
| METTL8    | -0.256389762 | 1.63619427 | -5.724453013 | 2.89E-08 | 9.06E-08 | 8.068602258 |
| ASCC1     | -0.370933989 | 3.71614118 | -5.722291175 | 2.93E-08 | 9.16E-08 | 8.057639973 |
| FTSJ1     | -0.318648264 | 5.4430465  | -5.722273268 | 2.93E-08 | 9.16E-08 | 8.057549183 |
| C11orf58  | -0.416930424 | 5.63787439 | -5.721057983 | 2.95E-08 | 9.22E-08 | 8.051388116 |
| ADAMTS    | -0.388095514 | 1.81105024 | -5.720995886 | 2.95E-08 | 9.22E-08 | 8.051073334 |
| ZRSR2     | -0.33978299  | 4.93610642 | -5.720598631 | 2.95E-08 | 9.23E-08 | 8.049059625 |
| OTUB2     | -0.232521414 | 0.70205246 | -5.720222525 | 2.96E-08 | 9.25E-08 | 8.047153223 |
| VPS39     | -0.346471174 | 5.11784842 | -5.719767845 | 2.97E-08 | 9.27E-08 | 8.044848678 |
| PREPL     | -0.471649534 | 4.83782826 | -5.719503034 | 2.97E-08 | 9.28E-08 | 8.043506548 |
| JAML      | 0.656464765  | 1.83421205 | 5.7180177    | 2.99E-08 | 9.35E-08 | 8.035979377 |
| BRINP1    | 0.931246151  | 2.08980072 | 5.717576481  | 3.00E-08 | 9.37E-08 | 8.033743722 |
| MAB21L4   | 0.415824742  | 0.6121076  | 5.717195931  | 3.01E-08 | 9.39E-08 | 8.031815583 |
| DOHH      | -0.332950328 | 3.98504149 | -5.715988547 | 3.02E-08 | 9.45E-08 | 8.025698763 |
| EIF1      | -0.319024225 | 8.65582199 | -5.71567446  | 3.03E-08 | 9.46E-08 | 8.024107706 |
| NLRC5     | 0.580364313  | 2.66299628 | 5.715427771  | 3.03E-08 | 9.47E-08 | 8.022858111 |
| CSNK1G    | -0.39259188  | 3.06278874 | -5.714212144 | 3.05E-08 | 9.53E-08 | 8.016701008 |
| SNX2      | -0.457162943 | 6.17407208 | -5.713243997 | 3.07E-08 | 9.58E-08 | 8.011798102 |
| ACTR1B    | -0.37310069  | 6.68195369 | -5.71304689  | 3.07E-08 | 9.58E-08 | 8.010799988 |
| UBE2S     | -0.415615124 | 3.09631036 | -5.71281369  | 3.07E-08 | 9.59E-08 | 8.009619143 |
| NIBAN1    | 0.828939234  | 3.61927364 | 5.712236702  | 3.08E-08 | 9.62E-08 | 8.006697626 |
| TGIF2-IT1 | -0.167138044 | 0.28986021 | -5.71109734  | 3.10E-08 | 9.68E-08 | 8.000929266 |
| CD1E      | 0.875707167  | 1.44694211 | 5.710432405  | 3.11E-08 | 9.71E-08 | 7.997563241 |

|          |              |            |              |          |          |             |
|----------|--------------|------------|--------------|----------|----------|-------------|
| ADAT2    | -0.370721526 | 1.62556089 | -5.710282074 | 3.12E-08 | 9.71E-08 | 7.996802282 |
| CCT4     | -0.439543795 | 7.15551631 | -5.709962516 | 3.12E-08 | 9.73E-08 | 7.995184758 |
| MIB2     | -0.38867178  | 3.95025758 | -5.709080906 | 3.14E-08 | 9.77E-08 | 7.990722638 |
| SLAMF8   | 0.882195368  | 2.6033413  | 5.708627777  | 3.14E-08 | 9.79E-08 | 7.988429412 |
| ZNF568   | -0.306928775 | 2.08034913 | -5.707200085 | 3.17E-08 | 9.86E-08 | 7.981204962 |
| HYAL1    | -0.41250584  | 2.23877745 | -5.706701448 | 3.17E-08 | 9.89E-08 | 7.978682075 |
| U2AF1L4  | -0.476754306 | 3.60829982 | -5.706066785 | 3.19E-08 | 9.92E-08 | 7.975471198 |
| ADGRE2   | 0.408829646  | 0.84768146 | 5.704138886  | 3.22E-08 | 1.00E-07 | 7.965719302 |
| C19orf47 | -0.248369366 | 3.37837984 | -5.70346851  | 3.23E-08 | 1.01E-07 | 7.962328936 |
| LAMB2    | -0.448177171 | 6.93406921 | -5.702631502 | 3.24E-08 | 1.01E-07 | 7.958096276 |
| RNF4     | -0.384408938 | 4.76687738 | -5.702381465 | 3.25E-08 | 1.01E-07 | 7.95683196  |
| ADGRF3   | -0.211717864 | 0.68447864 | -5.700323809 | 3.28E-08 | 1.02E-07 | 7.946429008 |
| PDCD1L   | 0.595135001  | 1.66172762 | 5.699538044  | 3.30E-08 | 1.03E-07 | 7.942457162 |
| HSPA4    | -0.361427231 | 6.24532627 | -5.699375513 | 3.30E-08 | 1.03E-07 | 7.941635658 |
| PACRG    | -0.469863097 | 1.31766212 | -5.69813785  | 3.32E-08 | 1.03E-07 | 7.935380574 |
| TSPYL5   | -0.563514147 | 4.12378095 | -5.697364095 | 3.33E-08 | 1.04E-07 | 7.93147059  |
| GOSR1    | -0.345440689 | 3.99818267 | -5.696573808 | 3.35E-08 | 1.04E-07 | 7.927477493 |
| MZF1     | -0.469902746 | 3.94256841 | -5.695876018 | 3.36E-08 | 1.04E-07 | 7.923952112 |
| LRRC43   | -0.415982915 | 1.65768463 | -5.695868616 | 3.36E-08 | 1.04E-07 | 7.923914714 |
| PCDHB1   | -0.643652771 | 1.72948066 | -5.695061833 | 3.37E-08 | 1.05E-07 | 7.919839098 |
| KDM1A    | -0.346549692 | 5.41217218 | -5.693526065 | 3.40E-08 | 1.06E-07 | 7.912082114 |
| PFDN6    | -0.336829896 | 5.18672928 | -5.693277377 | 3.40E-08 | 1.06E-07 | 7.910826173 |
| KCNMB3   | -0.139130984 | 0.45807341 | -5.693085596 | 3.41E-08 | 1.06E-07 | 7.909857659 |
| BSDC1    | -0.349973146 | 5.6907507  | -5.692342214 | 3.42E-08 | 1.06E-07 | 7.906103729 |
| WIPI1    | -0.378860937 | 4.15723292 | -5.691700232 | 3.43E-08 | 1.07E-07 | 7.902862155 |
| SRPX2    | 0.708948321  | 1.69293872 | 5.691049344  | 3.44E-08 | 1.07E-07 | 7.899575898 |
| SH3KBP   | -0.414275129 | 4.58648888 | -5.690655804 | 3.45E-08 | 1.07E-07 | 7.897589106 |
| ZNF740   | -0.378588643 | 3.96777888 | -5.687234481 | 3.51E-08 | 1.09E-07 | 7.880320977 |
| SAFB2    | -0.321222463 | 5.26704415 | -5.686880425 | 3.52E-08 | 1.09E-07 | 7.87853444  |
| ZDHHC2   | -0.430574434 | 2.32778492 | -5.685985069 | 3.54E-08 | 1.10E-07 | 7.874016936 |
| AK9      | -0.314972351 | 1.97055476 | -5.684588642 | 3.56E-08 | 1.10E-07 | 7.866972393 |
| TRAPPC   | -0.298823378 | 0.71046441 | -5.684428841 | 3.56E-08 | 1.11E-07 | 7.866166327 |
| CCDC47   | -0.485130836 | 6.18312033 | -5.683117833 | 3.59E-08 | 1.11E-07 | 7.85955406  |
| MEOX2    | -0.594788679 | 1.91728313 | -5.683111911 | 3.59E-08 | 1.11E-07 | 7.859524197 |
| RNF114   | -0.331050179 | 6.04854681 | -5.682793914 | 3.59E-08 | 1.11E-07 | 7.857920508 |
| TCAIM    | -0.297554742 | 3.00619802 | -5.681996791 | 3.61E-08 | 1.12E-07 | 7.853900851 |
| RASD2    | 0.908080059  | 3.75114117 | 5.681541862  | 3.62E-08 | 1.12E-07 | 7.851606973 |
| RMND5A   | -0.449341856 | 4.54599557 | -5.681036865 | 3.63E-08 | 1.12E-07 | 7.849060809 |
| MXRA8    | 1.182550039  | 7.00258246 | 5.680915377  | 3.63E-08 | 1.12E-07 | 7.848448298 |
| ASAP3    | -0.396326344 | 5.08539648 | -5.680366887 | 3.64E-08 | 1.13E-07 | 7.845683085 |

|         |              |            |              |          |          |             |
|---------|--------------|------------|--------------|----------|----------|-------------|
| SMARCC  | -0.346571363 | 5.17453669 | -5.678172876 | 3.68E-08 | 1.14E-07 | 7.834624054 |
| ESPN    | 0.987804012  | 1.70434802 | 5.677630564  | 3.69E-08 | 1.14E-07 | 7.831891014 |
| POLL    | -0.308095498 | 4.2561497  | -5.677461354 | 3.70E-08 | 1.14E-07 | 7.831038301 |
| LILRA6  | 0.303088469  | 0.60407646 | 5.677126107  | 3.70E-08 | 1.15E-07 | 7.829348926 |
| DPP3    | -0.363513787 | 4.70887846 | -5.676535705 | 3.71E-08 | 1.15E-07 | 7.826373965 |
| KCNE4   | -0.665760954 | 2.96398749 | -5.675076085 | 3.74E-08 | 1.16E-07 | 7.819020149 |
| RPL15   | -0.345895349 | 8.90165354 | -5.674944461 | 3.74E-08 | 1.16E-07 | 7.818357078 |
| RPRD1B  | -0.444266753 | 4.20343521 | -5.674745218 | 3.75E-08 | 1.16E-07 | 7.817353387 |
| SURF4   | -0.459532768 | 7.60183916 | -5.673766829 | 3.77E-08 | 1.16E-07 | 7.812425144 |
| EIF2A   | -0.381331819 | 6.11433035 | -5.673325254 | 3.78E-08 | 1.17E-07 | 7.810201099 |
| CD99L2  | -0.391230292 | 4.66427348 | -5.673102106 | 3.78E-08 | 1.17E-07 | 7.80907724  |
| AIF1L   | -0.775485354 | 5.94879575 | -5.671663171 | 3.81E-08 | 1.18E-07 | 7.801831032 |
| BRI3BP  | -0.379395374 | 3.04077548 | -5.670803626 | 3.83E-08 | 1.18E-07 | 7.797503203 |
| ENOSF1  | -0.466575198 | 3.94524785 | -5.67075506  | 3.83E-08 | 1.18E-07 | 7.79725869  |
| SMOC2   | -1.033783811 | 4.0308119  | -5.66882945  | 3.87E-08 | 1.19E-07 | 7.787565112 |
| PNRC1   | -0.357507278 | 6.76681405 | -5.667241124 | 3.90E-08 | 1.20E-07 | 7.779571358 |
| PECAM1  | -0.499492919 | 6.14465687 | -5.66600299  | 3.92E-08 | 1.21E-07 | 7.773341258 |
| ZNF572  | -0.347222043 | 1.73408104 | -5.665099944 | 3.94E-08 | 1.22E-07 | 7.768797942 |
| ARFIP1  | -0.38964897  | 4.99524068 | -5.663660648 | 3.97E-08 | 1.22E-07 | 7.761557851 |
| ZMYND1  | -0.533954233 | 2.26668085 | -5.663472968 | 3.97E-08 | 1.23E-07 | 7.760613871 |
| HHAT    | -0.445014773 | 3.36346613 | -5.663085211 | 3.98E-08 | 1.23E-07 | 7.758663633 |
| IFT172  | -0.365281603 | 3.72759549 | -5.66283808  | 3.99E-08 | 1.23E-07 | 7.757420729 |
| SYT13   | -1.03290575  | 2.44162812 | -5.66256509  | 3.99E-08 | 1.23E-07 | 7.756047827 |
| ZNF280C | -0.331455968 | 2.7971287  | -5.66251402  | 3.99E-08 | 1.23E-07 | 7.755790991 |
| TTC5    | -0.325608252 | 2.6405943  | -5.66229232  | 4.00E-08 | 1.23E-07 | 7.754676078 |
| SIRT7   | -0.318480907 | 3.17492992 | -5.662154628 | 4.00E-08 | 1.23E-07 | 7.753983649 |
| KIAA132 | -0.682575948 | 2.23611084 | -5.660804104 | 4.03E-08 | 1.24E-07 | 7.747192811 |
| GSTO1   | -0.301386877 | 7.40035566 | -5.659327358 | 4.06E-08 | 1.25E-07 | 7.739768736 |
| CSF1    | 0.567745209  | 4.18967932 | 5.658909277  | 4.07E-08 | 1.25E-07 | 7.737667178 |
| KCNJ10  | -0.447288105 | 0.80257605 | -5.658883322 | 4.07E-08 | 1.25E-07 | 7.737536718 |
| DBN1    | -0.414103233 | 5.95791286 | -5.658803175 | 4.07E-08 | 1.25E-07 | 7.737133857 |
| LRTM2   | -0.195434623 | 0.14318698 | -5.658537192 | 4.08E-08 | 1.25E-07 | 7.735796934 |
| SEL1L3  | 0.901109155  | 5.08316286 | 5.656759291  | 4.11E-08 | 1.27E-07 | 7.726861816 |
| CD1A    | 1.121643227  | 1.69943714 | 5.656269913  | 4.12E-08 | 1.27E-07 | 7.724402752 |
| PRRT1   | -0.469999612 | 1.61909773 | -5.655808096 | 4.13E-08 | 1.27E-07 | 7.722082333 |
| PKP2    | 0.652521204  | 1.25530405 | 5.655336891  | 4.14E-08 | 1.27E-07 | 7.719714897 |
| CARD8   | -0.354789555 | 3.07196039 | -5.6552747   | 4.15E-08 | 1.27E-07 | 7.719402447 |
| SARS    | -0.420858616 | 7.21420117 | -5.655130986 | 4.15E-08 | 1.28E-07 | 7.718680432 |
| GIMAP4  | -0.516835988 | 5.17634766 | -5.654525278 | 4.16E-08 | 1.28E-07 | 7.715637528 |
| KANSL3  | -0.355268246 | 4.37032897 | -5.653712151 | 4.18E-08 | 1.28E-07 | 7.711553017 |

|          |              |            |              |          |          |             |
|----------|--------------|------------|--------------|----------|----------|-------------|
| LRRN4    | 0.284117332  | 0.34454056 | 5.651418857  | 4.23E-08 | 1.30E-07 | 7.700035757 |
| PDZRN3   | 0.551330098  | 1.08999327 | 5.649739962  | 4.27E-08 | 1.31E-07 | 7.691606408 |
| PHLDB2   | 0.624081717  | 2.57900524 | 5.649421567  | 4.27E-08 | 1.31E-07 | 7.690008038 |
| NSMCE2   | -0.257703621 | 4.19710484 | -5.648457194 | 4.29E-08 | 1.32E-07 | 7.68516723  |
| BPNT1    | -0.380090996 | 4.98474791 | -5.647594315 | 4.31E-08 | 1.32E-07 | 7.680836431 |
| NOP58    | -0.340208662 | 5.56848907 | -5.64732243  | 4.32E-08 | 1.33E-07 | 7.679471943 |
| HBS1L    | -0.309588824 | 3.51746411 | -5.646836551 | 4.33E-08 | 1.33E-07 | 7.677033628 |
| ZNF273   | -0.468838217 | 2.12122313 | -5.646344745 | 4.34E-08 | 1.33E-07 | 7.674565738 |
| C20orf14 | -0.174615647 | 0.53821761 | -5.644656861 | 4.38E-08 | 1.34E-07 | 7.666097174 |
| ACP5     | 0.976900677  | 4.48843805 | 5.644338145  | 4.39E-08 | 1.35E-07 | 7.664498315 |
| CCDC74   | -0.558564438 | 1.93086884 | -5.643962141 | 4.40E-08 | 1.35E-07 | 7.662612152 |
| ERMN     | 0.154780487  | 0.19929756 | 5.643724158  | 4.40E-08 | 1.35E-07 | 7.661418402 |
| MAP2K1   | -0.418534441 | 5.13727118 | -5.643686387 | 4.40E-08 | 1.35E-07 | 7.661228943 |
| STC1     | -0.819655534 | 4.92284956 | -5.643590017 | 4.40E-08 | 1.35E-07 | 7.660745553 |
| SLITRK5  | -0.41163401  | 0.36235938 | -5.641666635 | 4.45E-08 | 1.36E-07 | 7.651099254 |
| NFE2L1   | -0.434187335 | 7.42770395 | -5.641181155 | 4.46E-08 | 1.37E-07 | 7.648664837 |
| FGFR2    | -0.661544369 | 4.48245912 | -5.640684597 | 4.47E-08 | 1.37E-07 | 7.646175045 |
| AP3D1    | -0.356719966 | 5.9587848  | -5.640004363 | 4.49E-08 | 1.37E-07 | 7.642764553 |
| TRIM68   | -0.433936889 | 4.03644723 | -5.63985886  | 4.49E-08 | 1.38E-07 | 7.64203509  |
| EBF2     | -0.516398752 | 1.66792029 | -5.639491522 | 4.50E-08 | 1.38E-07 | 7.640193533 |
| TOLLIP   | -0.307596247 | 5.53476754 | -5.638761225 | 4.52E-08 | 1.38E-07 | 7.636532662 |
| GPC3     | -0.676045186 | 1.23443113 | -5.638306686 | 4.53E-08 | 1.39E-07 | 7.63425431  |
| SIGMAR   | -0.330609446 | 6.34161884 | -5.636950331 | 4.56E-08 | 1.39E-07 | 7.6274565   |
| NAPB     | -0.339811418 | 3.22901399 | -5.636683293 | 4.56E-08 | 1.40E-07 | 7.626118301 |
| GTF2E2   | -0.291379135 | 5.26156609 | -5.636231539 | 4.58E-08 | 1.40E-07 | 7.623854554 |
| DHX30    | -0.309220757 | 5.20949085 | -5.636157709 | 4.58E-08 | 1.40E-07 | 7.623484606 |
| CCDC13   | -0.389311745 | 4.69106432 | -5.63596773  | 4.58E-08 | 1.40E-07 | 7.622532671 |
| NFE2L2   | -0.510010693 | 6.32698087 | -5.635953522 | 4.58E-08 | 1.40E-07 | 7.622461478 |
| GID4     | -0.337804704 | 3.52457728 | -5.635165385 | 4.60E-08 | 1.41E-07 | 7.618512608 |
| GGCX     | -0.40659131  | 3.9436538  | -5.635030767 | 4.60E-08 | 1.41E-07 | 7.617838161 |
| ARMC10   | -0.296830146 | 4.57679687 | -5.633803078 | 4.63E-08 | 1.42E-07 | 7.611687934 |
| METRNL   | -0.392917446 | 6.08101271 | -5.63363243  | 4.64E-08 | 1.42E-07 | 7.610833136 |
| MTPN     | -0.455887205 | 7.09078203 | -5.633586053 | 4.64E-08 | 1.42E-07 | 7.610600834 |
| TDP2     | -0.302264    | 5.18370153 | -5.633083772 | 4.65E-08 | 1.42E-07 | 7.608084981 |
| SH3BP1   | 0.556526457  | 2.64353251 | 5.632865254  | 4.66E-08 | 1.42E-07 | 7.606990514 |
| DOK2     | 0.73185765   | 2.60984491 | 5.632511801  | 4.66E-08 | 1.42E-07 | 7.60522028  |
| CFHR3    | 0.145519007  | 0.1997845  | 5.630611189  | 4.71E-08 | 1.44E-07 | 7.595702732 |
| ZNF764   | -0.263152937 | 2.9527453  | -5.630598933 | 4.71E-08 | 1.44E-07 | 7.595641364 |
| PTPRA    | -0.360949178 | 6.4334411  | -5.630238661 | 4.72E-08 | 1.44E-07 | 7.593837546 |
| HACD4    | -0.3700784   | 2.15703766 | -5.629438548 | 4.74E-08 | 1.45E-07 | 7.589831836 |

|         |              |            |              |          |          |             |
|---------|--------------|------------|--------------|----------|----------|-------------|
| ADAMTS  | 0.485852654  | 1.10438792 | 5.628278023  | 4.77E-08 | 1.45E-07 | 7.584022535 |
| CSF2RB  | 0.70359438   | 2.31921411 | 5.627047191  | 4.80E-08 | 1.46E-07 | 7.57786232  |
| STIM2   | -0.351326125 | 3.74019372 | -5.626620646 | 4.81E-08 | 1.47E-07 | 7.57572774  |
| SBNO1   | -0.414284581 | 4.09485227 | -5.62592018  | 4.82E-08 | 1.47E-07 | 7.57222264  |
| RAPGEF  | -0.530545507 | 3.84418117 | -5.625565253 | 4.83E-08 | 1.47E-07 | 7.570446729 |
| LRRC3B  | -0.086631006 | 0.10095335 | -5.624211013 | 4.87E-08 | 1.48E-07 | 7.563671465 |
| SNTB2   | -0.414192109 | 4.16266132 | -5.623465385 | 4.89E-08 | 1.49E-07 | 7.55994163  |
| PEX19   | -0.437386937 | 6.2006978  | -5.623071433 | 4.90E-08 | 1.49E-07 | 7.557971134 |
| TBCEL   | -0.387770956 | 3.26567782 | -5.622699513 | 4.91E-08 | 1.49E-07 | 7.556110935 |
| YWHAQ   | -0.4417417   | 7.57901999 | -5.622383102 | 4.91E-08 | 1.50E-07 | 7.554528443 |
| MFSD5   | -0.270291141 | 5.17296578 | -5.622322774 | 4.92E-08 | 1.50E-07 | 7.554226726 |
| NRARP   | -0.610155368 | 2.88090073 | -5.621626751 | 4.93E-08 | 1.50E-07 | 7.550745932 |
| RARS    | -0.317691283 | 5.49711567 | -5.620572467 | 4.96E-08 | 1.51E-07 | 7.545474118 |
| HILPDA  | -0.359706001 | 3.28203887 | -5.619007018 | 5.00E-08 | 1.52E-07 | 7.537647708 |
| RAB26   | -0.438612034 | 1.69299459 | -5.618970958 | 5.00E-08 | 1.52E-07 | 7.537467452 |
| LRRC15  | 0.949322273  | 1.15492593 | 5.618947319  | 5.00E-08 | 1.52E-07 | 7.537349279 |
| SMIM32  | -0.638719925 | 0.55160648 | -5.615451418 | 5.09E-08 | 1.55E-07 | 7.519877928 |
| ORMDL1  | -0.362542028 | 5.11832794 | -5.615321204 | 5.10E-08 | 1.55E-07 | 7.519227323 |
| RNF145  | -0.526264211 | 5.95580655 | -5.61527068  | 5.10E-08 | 1.55E-07 | 7.518974887 |
| MSTO1   | -0.308273573 | 3.10214928 | -5.61510148  | 5.10E-08 | 1.55E-07 | 7.518129522 |
| CARMIL5 | -0.178810876 | 0.5479286  | -5.614956899 | 5.11E-08 | 1.55E-07 | 7.51740717  |
| R3HCC11 | -0.378151841 | 3.59863785 | -5.614267333 | 5.12E-08 | 1.56E-07 | 7.513962184 |
| LRSAM1  | -0.323943949 | 4.32698124 | -5.613174861 | 5.15E-08 | 1.57E-07 | 7.508505007 |
| ING5    | -0.38641315  | 3.63267076 | -5.613140646 | 5.15E-08 | 1.57E-07 | 7.508334111 |
| IFFO2   | -0.519529051 | 4.13946677 | -5.613096097 | 5.15E-08 | 1.57E-07 | 7.508111597 |
| RTCB    | -0.440125127 | 6.13222663 | -5.612256338 | 5.18E-08 | 1.57E-07 | 7.503917394 |
| PCGF1   | -0.279146526 | 4.14422335 | -5.611689272 | 5.19E-08 | 1.58E-07 | 7.501085441 |
| ZSWIM3  | -0.320651099 | 2.61143737 | -5.609958498 | 5.24E-08 | 1.59E-07 | 7.492443266 |
| BTBD3   | -0.441135241 | 3.95537913 | -5.609683625 | 5.25E-08 | 1.59E-07 | 7.491070948 |
| NKX3-2  | 0.317968784  | 0.38835978 | 5.608745398  | 5.27E-08 | 1.60E-07 | 7.486387201 |
| TAPBPL  | -0.507336145 | 5.33675656 | -5.608654493 | 5.27E-08 | 1.60E-07 | 7.485933425 |
| APP     | -0.529624115 | 9.04198383 | -5.606728855 | 5.33E-08 | 1.62E-07 | 7.476322432 |
| NRIP1   | 0.806045741  | 4.10952845 | 5.606653384  | 5.33E-08 | 1.62E-07 | 7.475945806 |
| CFAP69  | -0.38603927  | 1.61379798 | -5.60533362  | 5.36E-08 | 1.63E-07 | 7.469360328 |
| AKAP8   | -0.330523917 | 4.47298864 | -5.604798359 | 5.38E-08 | 1.63E-07 | 7.466689778 |
| C1QL2   | 0.898015498  | 0.99252397 | 5.604380229  | 5.39E-08 | 1.63E-07 | 7.464603764 |
| FHL2    | -0.645400866 | 2.97145557 | -5.604136441 | 5.40E-08 | 1.64E-07 | 7.463387584 |
| WNT7A   | 0.355540786  | 0.32951154 | 5.604099771  | 5.40E-08 | 1.64E-07 | 7.463204653 |
| ABCG5   | -0.061638335 | 0.09312504 | -5.603992273 | 5.40E-08 | 1.64E-07 | 7.462668397 |
| TRPM5   | -0.374481555 | 0.57436473 | -5.6033107   | 5.42E-08 | 1.64E-07 | 7.459268529 |



|          |              |            |              |          |          |             |
|----------|--------------|------------|--------------|----------|----------|-------------|
| ZNF227   | -0.315402135 | 2.83887935 | -5.601292061 | 5.48E-08 | 1.66E-07 | 7.449200923 |
| ZNF512   | -0.417356026 | 4.89190818 | -5.600445867 | 5.50E-08 | 1.67E-07 | 7.444981524 |
| NSUN5    | -0.313513139 | 4.39997881 | -5.599780514 | 5.52E-08 | 1.67E-07 | 7.441664206 |
| YTHDF2   | -0.315445889 | 5.69976913 | -5.599441891 | 5.53E-08 | 1.67E-07 | 7.439976015 |
| POP1     | -0.25983818  | 2.04710993 | -5.599166951 | 5.54E-08 | 1.68E-07 | 7.438605372 |
| IL2RG    | 1.059003416  | 3.39784499 | 5.598244066  | 5.56E-08 | 1.68E-07 | 7.434004952 |
| APCDD1   | 0.310496983  | 0.31868109 | 5.597121534  | 5.60E-08 | 1.69E-07 | 7.428410129 |
| SERF1B   | -0.199904595 | 0.63927688 | -5.596843327 | 5.60E-08 | 1.69E-07 | 7.42702365  |
| MCAM     | -0.60938512  | 5.24128704 | -5.596831332 | 5.60E-08 | 1.69E-07 | 7.42696387  |
| GPX7     | -0.565114598 | 4.88291588 | -5.596814563 | 5.60E-08 | 1.69E-07 | 7.426880301 |
| GRAMD4   | -0.484220458 | 4.89644586 | -5.596691977 | 5.61E-08 | 1.70E-07 | 7.426269399 |
| MAFF     | 0.752635005  | 3.86543024 | 5.596489546  | 5.61E-08 | 1.70E-07 | 7.425260614 |
| GNB2     | -0.347971937 | 7.84790762 | -5.596186188 | 5.62E-08 | 1.70E-07 | 7.423748929 |
| IKBK     | -0.360786109 | 2.21558429 | -5.594235842 | 5.68E-08 | 1.72E-07 | 7.414031538 |
| CAB39    | -0.468684323 | 5.74994252 | -5.594170101 | 5.68E-08 | 1.72E-07 | 7.413704033 |
| VPS52    | -0.379074739 | 5.31838698 | -5.593649755 | 5.70E-08 | 1.72E-07 | 7.411111939 |
| CKMT1A   | -0.360530093 | 0.9285536  | -5.593547958 | 5.70E-08 | 1.72E-07 | 7.410604858 |
| PPP2R1I  | -0.340134475 | 3.36798203 | -5.593260636 | 5.71E-08 | 1.72E-07 | 7.409173668 |
| EPN1     | -0.293657064 | 4.47167324 | -5.591701129 | 5.75E-08 | 1.74E-07 | 7.401406553 |
| CST6     | 1.899263877  | 6.81082801 | 5.590857041  | 5.78E-08 | 1.74E-07 | 7.397203283 |
| NDN      | -0.657651791 | 5.37052767 | -5.590512604 | 5.79E-08 | 1.75E-07 | 7.395488249 |
| SNURF    | -0.362334613 | 1.76848366 | -5.590157644 | 5.80E-08 | 1.75E-07 | 7.393720906 |
| GJB1     | -0.329564432 | 0.28690754 | -5.589245402 | 5.83E-08 | 1.76E-07 | 7.389179251 |
| OSBPL9   | -0.360984559 | 5.01103183 | -5.589108742 | 5.83E-08 | 1.76E-07 | 7.388498933 |
| HLA-DQA1 | 0.908181639  | 2.39498261 | 5.589076716  | 5.83E-08 | 1.76E-07 | 7.388339505 |
| GPR84    | 0.422217056  | 1.01768019 | 5.588621661  | 5.85E-08 | 1.76E-07 | 7.386074256 |
| ZNF607   | -0.323825204 | 2.83137408 | -5.588603621 | 5.85E-08 | 1.76E-07 | 7.385984457 |
| C10orf90 | -0.321826041 | 0.26801128 | -5.58857902  | 5.85E-08 | 1.76E-07 | 7.385861995 |
| ZNF197   | -0.354089181 | 3.43530486 | -5.587860377 | 5.87E-08 | 1.77E-07 | 7.382284934 |
| SAA1     | 0.915014559  | 1.2297075  | 5.587627849  | 5.88E-08 | 1.77E-07 | 7.381127593 |
| TAF5     | -0.26236772  | 2.0867355  | -5.587155284 | 5.89E-08 | 1.77E-07 | 7.378775663 |
| TNFSF4   | 0.478705408  | 1.28323467 | 5.585496237  | 5.94E-08 | 1.79E-07 | 7.370519896 |
| CPNE4    | 0.867356344  | 1.35172507 | 5.585378003  | 5.94E-08 | 1.79E-07 | 7.369931612 |
| CDC42E1  | 0.807067391  | 4.50759605 | 5.584817958  | 5.96E-08 | 1.79E-07 | 7.367145192 |
| TAF9     | -0.261660292 | 5.05964682 | -5.58421483  | 5.98E-08 | 1.80E-07 | 7.364144661 |
| FJX1     | -0.516830411 | 2.94500493 | -5.584170173 | 5.98E-08 | 1.80E-07 | 7.363922504 |
| TAF7     | -0.391783785 | 7.04563499 | -5.582982933 | 6.02E-08 | 1.81E-07 | 7.358016826 |
| THBS2    | 1.033770729  | 3.47646105 | 5.582944818  | 6.02E-08 | 1.81E-07 | 7.357827244 |
| DNTTIP1  | -0.309396971 | 5.63169497 | -5.580811268 | 6.08E-08 | 1.83E-07 | 7.347216867 |
| MT2A     | -0.74318513  | 8.94116223 | -5.580081365 | 6.11E-08 | 1.84E-07 | 7.343587708 |

|          |              |            |              |          |          |             |
|----------|--------------|------------|--------------|----------|----------|-------------|
| ST3GAL   | -0.623976837 | 6.62468225 | -5.579512298 | 6.12E-08 | 1.84E-07 | 7.340758498 |
| SCARA3   | 1.202658309  | 6.13413868 | 5.578876851  | 6.14E-08 | 1.85E-07 | 7.33759954  |
| ENG      | -0.613386466 | 7.39891507 | -5.578719622 | 6.15E-08 | 1.85E-07 | 7.336817959 |
| RPAP3    | -0.333228923 | 3.93651933 | -5.577809407 | 6.18E-08 | 1.86E-07 | 7.332293653 |
| VMA21    | -0.320326366 | 4.89862537 | -5.577659083 | 6.18E-08 | 1.86E-07 | 7.331546512 |
| HNRNPA   | -0.341980845 | 2.86047133 | -5.574886015 | 6.27E-08 | 1.88E-07 | 7.317766572 |
| FIP1L1   | -0.374099562 | 4.00494391 | -5.573666973 | 6.31E-08 | 1.90E-07 | 7.311710603 |
| DNM1L    | -0.300226112 | 4.58507545 | -5.57365578  | 6.31E-08 | 1.90E-07 | 7.311655004 |
| ARHGAP   | -0.554205542 | 4.37630383 | -5.572870158 | 6.34E-08 | 1.90E-07 | 7.307752738 |
| DEK      | -0.480620967 | 6.52784483 | -5.572238456 | 6.36E-08 | 1.91E-07 | 7.304615324 |
| SIRPA    | 0.573758065  | 3.70836022 | 5.570983657  | 6.40E-08 | 1.92E-07 | 7.29838405  |
| CBWD6    | -0.147359536 | 0.52592636 | -5.570330778 | 6.42E-08 | 1.93E-07 | 7.29514232  |
| KLHL13   | 0.394080555  | 0.65397349 | 5.569768991  | 6.44E-08 | 1.93E-07 | 7.292353129 |
| PGRMC1   | -0.457273681 | 7.77529955 | -5.569761095 | 6.44E-08 | 1.93E-07 | 7.292313927 |
| C20orf27 | -0.398222657 | 5.08672556 | -5.56972435  | 6.44E-08 | 1.93E-07 | 7.292131499 |
| PPP1R1   | -0.293847798 | 6.51711545 | -5.569309989 | 6.45E-08 | 1.94E-07 | 7.290074409 |
| KATNB1   | -0.309022191 | 3.91066616 | -5.569195777 | 6.46E-08 | 1.94E-07 | 7.289507428 |
| MVP      | 0.590705312  | 6.76557537 | 5.568384537  | 6.48E-08 | 1.94E-07 | 7.285480444 |
| ANO5     | -0.526127996 | 1.60456712 | -5.567735381 | 6.51E-08 | 1.95E-07 | 7.282258379 |
| BATF3    | 0.49317721   | 1.42813085 | 5.567402244  | 6.52E-08 | 1.95E-07 | 7.280604975 |
| GRB2     | -0.326618785 | 6.4922789  | -5.567291171 | 6.52E-08 | 1.95E-07 | 7.280053721 |
| PLAC8L1  | -0.269665153 | 0.60707488 | -5.566421284 | 6.55E-08 | 1.96E-07 | 7.275736792 |
| WDR3     | -0.381294208 | 3.08005185 | -5.565683799 | 6.57E-08 | 1.97E-07 | 7.272077342 |
| RAB11FI  | -0.499713087 | 3.79241409 | -5.563957604 | 6.63E-08 | 1.99E-07 | 7.263513327 |
| PPP2R2   | -0.374416773 | 4.43400498 | -5.563246736 | 6.66E-08 | 1.99E-07 | 7.259987162 |
| P3H2     | -0.460814414 | 2.19245527 | -5.563151518 | 6.66E-08 | 1.99E-07 | 7.259514875 |
| IRS2     | 0.624623     | 3.84873269 | 5.562846737  | 6.67E-08 | 2.00E-07 | 7.258003181 |
| SECISBF  | -0.384351214 | 4.3199991  | -5.561784535 | 6.71E-08 | 2.01E-07 | 7.252735232 |
| HLA-DQ   | 1.137484414  | 4.75495178 | 5.56166045   | 6.71E-08 | 2.01E-07 | 7.252119888 |
| ZHX1-C8  | -0.205666013 | 0.93140811 | -5.561315264 | 6.72E-08 | 2.01E-07 | 7.25040815  |
| HLA-DO   | 1.15772788   | 3.92011842 | 5.56102471   | 6.73E-08 | 2.01E-07 | 7.248967393 |
| NATD1    | -0.461900127 | 4.53736978 | -5.56085496  | 6.74E-08 | 2.02E-07 | 7.248125686 |
| C10orf88 | -0.285395638 | 3.11003411 | -5.560338272 | 6.76E-08 | 2.02E-07 | 7.245563815 |
| ABAT     | -0.746915677 | 4.97420627 | -5.559432255 | 6.79E-08 | 2.03E-07 | 7.241071994 |
| GK       | -0.291388039 | 1.85809407 | -5.558389951 | 6.82E-08 | 2.04E-07 | 7.235905208 |
| PQBP1    | -0.328570281 | 6.59795706 | -5.557863791 | 6.84E-08 | 2.05E-07 | 7.23329728  |
| SERHL2   | -0.375082647 | 1.22920767 | -5.556366437 | 6.90E-08 | 2.06E-07 | 7.225876652 |
| EXOSC2   | -0.291576734 | 3.62742438 | -5.555866708 | 6.91E-08 | 2.06E-07 | 7.223400431 |
| NEU1     | -0.396936258 | 6.63415716 | -5.555860055 | 6.91E-08 | 2.06E-07 | 7.223367467 |
| NR1D1    | 0.871614803  | 5.70848627 | 5.555678374  | 6.92E-08 | 2.07E-07 | 7.222467261 |

|          |              |            |              |          |          |             |
|----------|--------------|------------|--------------|----------|----------|-------------|
| SCGB3A   | -0.396372607 | 0.32174235 | -5.554242977 | 6.97E-08 | 2.08E-07 | 7.215355842 |
| S100A4   | 1.136916416  | 7.8499207  | 5.55296192   | 7.02E-08 | 2.09E-07 | 7.209010294 |
| CACNA1   | -0.597843992 | 2.33135043 | -5.552253    | 7.04E-08 | 2.10E-07 | 7.205499241 |
| AGPAT3   | -0.357080147 | 4.91692483 | -5.551438908 | 7.07E-08 | 2.11E-07 | 7.201467741 |
| HACD3    | -0.564780519 | 6.17900343 | -5.551424738 | 7.07E-08 | 2.11E-07 | 7.201397575 |
| DCAF8    | -0.346722602 | 5.32173938 | -5.551173294 | 7.08E-08 | 2.11E-07 | 7.200152488 |
| PPP1R8   | -0.335770593 | 5.53316877 | -5.550960634 | 7.09E-08 | 2.11E-07 | 7.199099477 |
| CEP89    | -0.27578809  | 3.25640185 | -5.549938097 | 7.13E-08 | 2.13E-07 | 7.194036729 |
| TPGS2    | -0.32010521  | 4.17726908 | -5.549777543 | 7.13E-08 | 2.13E-07 | 7.193241868 |
| TMOD1    | -0.832461765 | 2.8756866  | -5.547933972 | 7.20E-08 | 2.15E-07 | 7.184116098 |
| METTL1   | -0.326579318 | 4.27339205 | -5.547533481 | 7.21E-08 | 2.15E-07 | 7.182133965 |
| INTS8    | -0.323738744 | 3.35303464 | -5.547413063 | 7.22E-08 | 2.15E-07 | 7.181538005 |
| ARF5     | -0.297045392 | 7.47545312 | -5.546711916 | 7.24E-08 | 2.16E-07 | 7.178068171 |
| UTP4     | -0.334525587 | 4.50869589 | -5.546615258 | 7.25E-08 | 2.16E-07 | 7.177589858 |
| TREM1    | 0.861766577  | 2.17166357 | 5.546326623  | 7.26E-08 | 2.16E-07 | 7.176161586 |
| PIGG     | -0.366047675 | 3.75366065 | -5.546225476 | 7.26E-08 | 2.16E-07 | 7.175661084 |
| SERBP1   | -0.362931429 | 6.54329315 | -5.545472849 | 7.29E-08 | 2.17E-07 | 7.171937127 |
| EEF1AK1  | -0.413955092 | 4.55752391 | -5.545228757 | 7.30E-08 | 2.17E-07 | 7.170729457 |
| C16orf58 | -0.575024992 | 5.36979951 | -5.54465689  | 7.32E-08 | 2.18E-07 | 7.167900251 |
| ALOX5AI  | 0.926271674  | 4.15132612 | 5.544235674  | 7.34E-08 | 2.18E-07 | 7.165816513 |
| PRDX4    | -0.429983107 | 6.31543055 | -5.54371441  | 7.36E-08 | 2.19E-07 | 7.163238011 |
| TMEM23   | -0.160322351 | 0.12138048 | -5.542707966 | 7.39E-08 | 2.20E-07 | 7.158260041 |
| CD86     | 0.648185545  | 2.28987523 | 5.542470869  | 7.40E-08 | 2.20E-07 | 7.15708744  |
| EGFL6    | 0.474637799  | 0.88323414 | 5.542297116  | 7.41E-08 | 2.20E-07 | 7.156228143 |
| NR2F2    | -0.43948331  | 4.03804157 | -5.540827918 | 7.46E-08 | 2.22E-07 | 7.14896304  |
| PAN2     | -0.474718111 | 4.30175817 | -5.540800103 | 7.47E-08 | 2.22E-07 | 7.148825511 |
| SMARCE1  | -0.338172562 | 6.70208745 | -5.540424312 | 7.48E-08 | 2.22E-07 | 7.146967494 |
| IL36RN   | 0.490248859  | 0.90568988 | 5.540338426  | 7.48E-08 | 2.22E-07 | 7.146542868 |
| ZFP2     | -0.32422323  | 2.31141878 | -5.539880174 | 7.50E-08 | 2.23E-07 | 7.144277304 |
| SRF      | -0.437711035 | 5.39255787 | -5.539763093 | 7.50E-08 | 2.23E-07 | 7.143698485 |
| JUN      | -0.82418317  | 8.07335754 | -5.539653852 | 7.51E-08 | 2.23E-07 | 7.143158435 |
| VKORC1   | -0.35602971  | 5.39421549 | -5.539388037 | 7.52E-08 | 2.23E-07 | 7.141844377 |
| CCT6A    | -0.307239164 | 6.64358975 | -5.538632699 | 7.55E-08 | 2.24E-07 | 7.138110624 |
| SART1    | -0.29291514  | 5.94562584 | -5.537972416 | 7.57E-08 | 2.25E-07 | 7.134847068 |
| GALNT9   | -0.81174383  | 1.6977497  | -5.535387261 | 7.67E-08 | 2.28E-07 | 7.122072469 |
| RCAN1    | -0.764796712 | 3.9468429  | -5.534483663 | 7.71E-08 | 2.29E-07 | 7.117608424 |
| CNKSRR2  | 0.408504141  | 0.78297929 | 5.534351348  | 7.71E-08 | 2.29E-07 | 7.116954796 |
| GNAL     | -0.587616287 | 2.15329394 | -5.534055222 | 7.73E-08 | 2.29E-07 | 7.115492    |
| RPL37    | -0.344751193 | 7.79473046 | -5.533959855 | 7.73E-08 | 2.29E-07 | 7.115020916 |
| GLYR1    | -0.410379157 | 6.01790314 | -5.533641709 | 7.74E-08 | 2.30E-07 | 7.113449434 |

|         |              |            |              |          |          |             |
|---------|--------------|------------|--------------|----------|----------|-------------|
| HSPB1   | -0.47468825  | 9.47114172 | -5.533506    | 7.75E-08 | 2.30E-07 | 7.112779123 |
| SHTN1   | -0.415071651 | 4.26153228 | -5.533207242 | 7.76E-08 | 2.30E-07 | 7.111303496 |
| DIPK2A  | -0.436002468 | 3.69161418 | -5.531657307 | 7.82E-08 | 2.32E-07 | 7.103649076 |
| NEMP2   | -0.275504989 | 2.28975754 | -5.531651059 | 7.82E-08 | 2.32E-07 | 7.103618224 |
| PTPN21  | -0.493610452 | 4.40892591 | -5.531621473 | 7.82E-08 | 2.32E-07 | 7.103472126 |
| FBXO30  | -0.470567011 | 3.04249473 | -5.531081554 | 7.84E-08 | 2.32E-07 | 7.100806121 |
| TEDDM1  | -0.078394368 | 0.08063348 | -5.530864883 | 7.85E-08 | 2.33E-07 | 7.099736304 |
| NIPA1   | -0.468433431 | 3.28153719 | -5.529603367 | 7.90E-08 | 2.34E-07 | 7.093508198 |
| DNMT3B  | -0.369784195 | 1.64727666 | -5.529010297 | 7.93E-08 | 2.35E-07 | 7.090580594 |
| IPO8    | -0.374263458 | 4.59477749 | -5.52900151  | 7.93E-08 | 2.35E-07 | 7.090537219 |
| DOLK    | -0.337995458 | 5.13578651 | -5.527942371 | 7.97E-08 | 2.36E-07 | 7.085309561 |
| ZNF85   | -0.351484395 | 2.53119446 | -5.527760694 | 7.98E-08 | 2.36E-07 | 7.08441292  |
| FNDC5   | -0.652121532 | 1.9680065  | -5.527723757 | 7.98E-08 | 2.36E-07 | 7.084230629 |
| CNOT7   | -0.357784081 | 4.85239063 | -5.527376662 | 7.99E-08 | 2.36E-07 | 7.082517672 |
| C2orf68 | -0.288615011 | 4.52668728 | -5.526923552 | 8.01E-08 | 2.37E-07 | 7.080281646 |
| BARX2   | -0.419153031 | 0.38624849 | -5.525900513 | 8.05E-08 | 2.38E-07 | 7.075233647 |
| RHOA    | -0.333861245 | 9.28706966 | -5.52553629  | 8.07E-08 | 2.39E-07 | 7.073436628 |
| PHC2    | -0.3391291   | 6.44075953 | -5.52357553  | 8.15E-08 | 2.41E-07 | 7.063764167 |
| COQ8A   | -0.376220037 | 3.82426701 | -5.522491631 | 8.19E-08 | 2.42E-07 | 7.058418428 |
| MAP2K2  | -0.289820442 | 6.08202049 | -5.522319418 | 8.20E-08 | 2.42E-07 | 7.057569158 |
| ZBTB12  | -0.464370612 | 3.24983805 | -5.522246597 | 8.21E-08 | 2.42E-07 | 7.057210051 |
| AGGF1   | -0.373863042 | 4.54132202 | -5.520611049 | 8.27E-08 | 2.44E-07 | 7.04914545  |
| NPTN    | -0.459500303 | 6.5058095  | -5.519121024 | 8.34E-08 | 2.46E-07 | 7.04180004  |
| GALNT1  | -0.443591877 | 1.17119319 | -5.518622602 | 8.36E-08 | 2.47E-07 | 7.039343304 |
| NCAN    | -0.098981196 | 0.10950563 | -5.518164625 | 8.38E-08 | 2.47E-07 | 7.037086077 |
| CCR9    | 0.302964808  | 0.24852242 | 5.518153198  | 8.38E-08 | 2.47E-07 | 7.03702976  |
| WDYHV1  | -0.331704502 | 3.76959397 | -5.517328838 | 8.41E-08 | 2.48E-07 | 7.032967122 |
| FUBP3   | -0.459412439 | 5.50150235 | -5.516972938 | 8.43E-08 | 2.49E-07 | 7.031213312 |
| S100A6  | 0.822572002  | 12.1087699 | 5.516302998  | 8.46E-08 | 2.50E-07 | 7.027912207 |
| RAB11A  | -0.355101776 | 6.64701355 | -5.515646917 | 8.48E-08 | 2.50E-07 | 7.024679702 |
| CCR4    | 0.567010491  | 0.85079876 | 5.515622764  | 8.49E-08 | 2.50E-07 | 7.02456071  |
| ZSCAN2  | -0.349427363 | 2.86476351 | -5.515527494 | 8.49E-08 | 2.50E-07 | 7.024091342 |
| MEI4    | -0.580008767 | 1.15290524 | -5.515115308 | 8.51E-08 | 2.51E-07 | 7.022060694 |
| KCNN3   | -0.445516856 | 1.95392901 | -5.513501164 | 8.58E-08 | 2.53E-07 | 7.014109709 |
| FAM174  | -0.316236368 | 5.67306816 | -5.513477175 | 8.58E-08 | 2.53E-07 | 7.013991559 |
| MFN2    | -0.420182884 | 6.84072511 | -5.512356085 | 8.63E-08 | 2.54E-07 | 7.008470368 |
| ABCC6   | -0.525165676 | 2.7980585  | -5.510628436 | 8.70E-08 | 2.56E-07 | 6.999963701 |
| PCK2    | -0.438102649 | 5.265666   | -5.510046614 | 8.73E-08 | 2.57E-07 | 6.997099374 |
| CD207   | 1.1281425    | 1.95969422 | 5.509853598  | 8.74E-08 | 2.57E-07 | 6.996149201 |
| DDX24   | -0.366711906 | 6.53175941 | -5.508844981 | 8.78E-08 | 2.59E-07 | 6.991184453 |

|         |              |            |              |          |          |             |
|---------|--------------|------------|--------------|----------|----------|-------------|
| SNTG2   | -0.268081923 | 0.53910801 | -5.507660593 | 8.84E-08 | 2.60E-07 | 6.985355415 |
| SLIT2   | 0.847364227  | 2.81013089 | 5.507097578  | 8.86E-08 | 2.61E-07 | 6.98258485  |
| PSME4   | -0.377214904 | 4.36906816 | -5.506917492 | 8.87E-08 | 2.61E-07 | 6.981698703 |
| CWC22   | -0.390384228 | 4.8011783  | -5.506809648 | 8.87E-08 | 2.61E-07 | 6.981168047 |
| RPS10   | -0.388860219 | 7.94497776 | -5.506311352 | 8.90E-08 | 2.62E-07 | 6.978716245 |
| L2HGDH  | -0.415871511 | 2.25255523 | -5.503280904 | 9.03E-08 | 2.66E-07 | 6.963809078 |
| HPGDS   | 0.519706919  | 1.68969364 | 5.502630849  | 9.06E-08 | 2.67E-07 | 6.960612213 |
| ZNF586  | -0.289186822 | 2.8287882  | -5.502220734 | 9.08E-08 | 2.67E-07 | 6.958595488 |
| PIK3R4  | -0.460505965 | 4.55979703 | -5.502220381 | 9.08E-08 | 2.67E-07 | 6.958593752 |
| RIMS2   | 0.577943361  | 1.27493081 | 5.502001871  | 9.09E-08 | 2.67E-07 | 6.957519285 |
| GSTO2   | -0.41359612  | 3.07036758 | -5.501748691 | 9.11E-08 | 2.68E-07 | 6.95627438  |
| MRPS30  | -0.283460748 | 4.25199575 | -5.501651873 | 9.11E-08 | 2.68E-07 | 6.955798333 |
| FZD3    | -0.423799855 | 2.46157788 | -5.501204531 | 9.13E-08 | 2.68E-07 | 6.953598859 |
| NME3    | -0.58284389  | 6.60759861 | -5.500419414 | 9.17E-08 | 2.69E-07 | 6.949738967 |
| RAB3IP  | -0.336058371 | 2.63283921 | -5.499691956 | 9.20E-08 | 2.70E-07 | 6.946162934 |
| KRTDAP  | -0.401826345 | 1.08566704 | -5.499003275 | 9.23E-08 | 2.71E-07 | 6.942777865 |
| HDAC4   | -0.371558581 | 2.11198735 | -5.49850476  | 9.26E-08 | 2.72E-07 | 6.940327724 |
| BMPR1A  | -0.410681898 | 3.83096323 | -5.498218849 | 9.27E-08 | 2.72E-07 | 6.93892259  |
| FAM161E | -0.359623672 | 2.7351847  | -5.498156857 | 9.27E-08 | 2.72E-07 | 6.938617929 |
| DMPK    | -0.527281363 | 3.65001608 | -5.497442763 | 9.31E-08 | 2.73E-07 | 6.935108726 |
| DLG1    | -0.423193268 | 4.47816998 | -5.496822078 | 9.34E-08 | 2.74E-07 | 6.932058843 |
| WDR33   | -0.307313643 | 3.92437367 | -5.496817202 | 9.34E-08 | 2.74E-07 | 6.932034888 |
| SDCBP   | -0.413310648 | 6.37391053 | -5.495812484 | 9.38E-08 | 2.75E-07 | 6.927098546 |
| MFSD10  | -0.475399247 | 6.21524247 | -5.495398322 | 9.40E-08 | 2.76E-07 | 6.925063909 |
| MFSD1   | -0.410334703 | 5.26154777 | -5.494650349 | 9.44E-08 | 2.77E-07 | 6.921389681 |
| B3GALT  | -0.364733457 | 5.11667943 | -5.494608116 | 9.44E-08 | 2.77E-07 | 6.921182232 |
| OSGIN1  | -0.591181336 | 2.94032095 | -5.494202294 | 9.46E-08 | 2.77E-07 | 6.919188912 |
| ZNF605  | -0.346368764 | 2.74138968 | -5.494201886 | 9.46E-08 | 2.77E-07 | 6.91918691  |
| LANCL2  | -0.309724605 | 4.49623294 | -5.49363822  | 9.49E-08 | 2.78E-07 | 6.916418478 |
| TSPYL1  | -0.460573988 | 7.26264062 | -5.493055802 | 9.52E-08 | 2.79E-07 | 6.913558185 |
| CCDC16  | -0.565328199 | 1.92197974 | -5.492001366 | 9.57E-08 | 2.80E-07 | 6.908380385 |
| CDH3    | 1.162494428  | 4.99647139 | 5.491691871  | 9.58E-08 | 2.81E-07 | 6.906860764 |
| HLCS    | -0.393557256 | 3.65519477 | -5.490010466 | 9.66E-08 | 2.83E-07 | 6.89860623  |
| ZNF879  | -0.337520804 | 2.38533128 | -5.487239178 | 9.80E-08 | 2.87E-07 | 6.885005473 |
| PNPLA8  | -0.433337694 | 4.45531704 | -5.487168232 | 9.80E-08 | 2.87E-07 | 6.88465736  |
| CDC25B  | 0.558098007  | 5.19501591 | 5.48677629   | 9.82E-08 | 2.88E-07 | 6.882734265 |
| RAB22A  | -0.312836935 | 4.30788062 | -5.48673757  | 9.83E-08 | 2.88E-07 | 6.882544291 |
| MYNN    | -0.302324813 | 3.14427676 | -5.486522627 | 9.84E-08 | 2.88E-07 | 6.88148971  |
| MIS18A  | -0.307494175 | 3.76290996 | -5.486046962 | 9.86E-08 | 2.88E-07 | 6.879156052 |
| KIAA201 | -0.368469836 | 6.83602342 | -5.485996393 | 9.86E-08 | 2.88E-07 | 6.878907966 |

|          |              |            |              |          |          |             |
|----------|--------------|------------|--------------|----------|----------|-------------|
| DNAH6    | -0.328087253 | 0.93744863 | -5.485039683 | 9.91E-08 | 2.90E-07 | 6.874214779 |
| MOV10L   | -0.130514217 | 0.25741545 | -5.48440693  | 9.94E-08 | 2.91E-07 | 6.871111136 |
| RMDN2    | -0.34927571  | 2.17721359 | -5.48438144  | 9.94E-08 | 2.91E-07 | 6.870986112 |
| DALRD3   | -0.355607049 | 4.79528628 | -5.483791957 | 9.97E-08 | 2.91E-07 | 6.868094973 |
| NR1I3    | -0.107016115 | 0.28081968 | -5.482659392 | 1.00E-07 | 2.93E-07 | 6.862540951 |
| PRPF38   | -0.362737224 | 4.84714435 | -5.482079705 | 1.01E-07 | 2.94E-07 | 6.859698561 |
| VPS37B   | -0.353738505 | 4.86639868 | -5.481832019 | 1.01E-07 | 2.94E-07 | 6.858484146 |
| CXXC1    | -0.329217024 | 5.06435395 | -5.481280134 | 1.01E-07 | 2.95E-07 | 6.855778393 |
| HOXA4    | -0.267221078 | 0.81998445 | -5.481184499 | 1.01E-07 | 2.95E-07 | 6.855309541 |
| SPINK13  | -0.404775134 | 0.85793071 | -5.48111564  | 1.01E-07 | 2.95E-07 | 6.854971959 |
| SCAND1   | -0.473255836 | 6.22078834 | -5.480832531 | 1.01E-07 | 2.96E-07 | 6.853584066 |
| TNFRSF10 | 0.452551874  | 0.68658588 | 5.480584472  | 1.01E-07 | 2.96E-07 | 6.852368042 |
| EHD1     | -0.354991886 | 5.06133868 | -5.478696015 | 1.02E-07 | 2.99E-07 | 6.843111957 |
| URGCP1   | -0.127874981 | 0.28198056 | -5.478559979 | 1.02E-07 | 2.99E-07 | 6.842445288 |
| PEX1     | -0.406755704 | 3.33479036 | -5.477852897 | 1.03E-07 | 3.00E-07 | 6.838980312 |
| KCNT2    | 0.418997689  | 0.90513704 | 5.47643035   | 1.04E-07 | 3.02E-07 | 6.832010351 |
| SYNCRIF  | -0.381082675 | 6.00328123 | -5.475005789 | 1.04E-07 | 3.04E-07 | 6.825031958 |
| CAMKK2   | -0.314806961 | 4.44563116 | -5.474245143 | 1.05E-07 | 3.05E-07 | 6.821306421 |
| ZNF862   | -0.39881695  | 3.03853003 | -5.473606806 | 1.05E-07 | 3.06E-07 | 6.818180253 |
| ZNF571   | -0.264228361 | 2.01394542 | -5.470716263 | 1.07E-07 | 3.11E-07 | 6.804027813 |
| UTP14C   | -0.559697202 | 4.05011375 | -5.470574805 | 1.07E-07 | 3.11E-07 | 6.80333537  |
| MEX3A    | 0.568684661  | 1.80085559 | 5.470359191  | 1.07E-07 | 3.11E-07 | 6.802279961 |
| ACACA    | -0.402826363 | 3.34509268 | -5.468639523 | 1.08E-07 | 3.14E-07 | 6.793863499 |
| DDX19B   | -0.253535085 | 3.94444504 | -5.468215518 | 1.08E-07 | 3.14E-07 | 6.791788638 |
| CD37     | 0.746661417  | 2.8868923  | 5.467980851  | 1.08E-07 | 3.15E-07 | 6.790640354 |
| HRAS     | -0.385486237 | 5.49485236 | -5.467371692 | 1.08E-07 | 3.16E-07 | 6.787659774 |
| SIGLEC10 | 0.804093043  | 1.5774539  | 5.464913795  | 1.10E-07 | 3.19E-07 | 6.775636081 |
| PTPRQ    | -0.337162558 | 0.39679242 | -5.464852059 | 1.10E-07 | 3.19E-07 | 6.775334132 |
| RPS14    | -0.354323072 | 8.91701108 | -5.464771668 | 1.10E-07 | 3.20E-07 | 6.774940946 |
| PPP1R3   | -0.592170988 | 2.03482049 | -5.464746136 | 1.10E-07 | 3.20E-07 | 6.774816069 |
| GTPBP1   | -0.277912687 | 2.75866033 | -5.464307728 | 1.10E-07 | 3.20E-07 | 6.772671938 |
| SEN2     | -0.388602523 | 4.28673612 | -5.464286996 | 1.10E-07 | 3.20E-07 | 6.772570551 |
| C15orf48 | 0.996887612  | 3.9229348  | 5.463711975  | 1.10E-07 | 3.21E-07 | 6.769758498 |
| TTC9     | -0.447609351 | 4.30369008 | -5.463316331 | 1.11E-07 | 3.22E-07 | 6.767823798 |
| SSR3     | -0.419645156 | 6.98849569 | -5.463236365 | 1.11E-07 | 3.22E-07 | 6.767432776 |
| TMEM20   | -0.41239623  | 4.06224889 | -5.462572683 | 1.11E-07 | 3.23E-07 | 6.764187656 |
| TTC38    | -0.35136845  | 4.65577105 | -5.462401996 | 1.11E-07 | 3.23E-07 | 6.763353121 |
| CDCA7L   | -0.678704047 | 4.2216569  | -5.461826724 | 1.11E-07 | 3.24E-07 | 6.760540609 |
| PERP     | 0.717314255  | 7.02595858 | 5.460362543  | 1.12E-07 | 3.26E-07 | 6.753383264 |
| HEPHL1   | -0.258828312 | 0.50841766 | -5.460274624 | 1.12E-07 | 3.26E-07 | 6.752953536 |

|         |              |            |              |          |          |             |
|---------|--------------|------------|--------------|----------|----------|-------------|
| CRISPLC | -0.741437273 | 3.24506852 | -5.458691268 | 1.13E-07 | 3.29E-07 | 6.745215439 |
| BET1L   | -0.310327583 | 6.04168194 | -5.457165269 | 1.14E-07 | 3.31E-07 | 6.737759332 |
| GJD4    | -0.249590147 | 0.23071639 | -5.456842096 | 1.14E-07 | 3.32E-07 | 6.736180502 |
| COMMD1  | -0.353677879 | 4.42146462 | -5.456444023 | 1.14E-07 | 3.32E-07 | 6.73423586  |
| THBS1   | 0.91717488   | 4.21851318 | 5.455395452  | 1.15E-07 | 3.34E-07 | 6.729113981 |
| GGTLC2  | -0.525496987 | 0.87863138 | -5.454910741 | 1.15E-07 | 3.35E-07 | 6.726746611 |
| PLOD3   | -0.284421224 | 5.02162879 | -5.454717467 | 1.16E-07 | 3.35E-07 | 6.72580269  |
| PODXL2  | -0.62624888  | 4.20191293 | -5.454673162 | 1.16E-07 | 3.35E-07 | 6.725586315 |
| EFCAB7  | -0.312803861 | 2.29254025 | -5.454601565 | 1.16E-07 | 3.35E-07 | 6.725236656 |
| KLHDC11 | -0.35425842  | 4.92098349 | -5.453449078 | 1.16E-07 | 3.37E-07 | 6.719608729 |
| GPN3    | -0.363127914 | 4.64087209 | -5.453096485 | 1.16E-07 | 3.38E-07 | 6.717887107 |
| EDN2    | -0.615349587 | 1.20320813 | -5.452814631 | 1.17E-07 | 3.38E-07 | 6.716510944 |
| PPP2R1  | -0.29214025  | 7.27771048 | -5.452728333 | 1.17E-07 | 3.38E-07 | 6.716089605 |
| TPM1    | -0.396924082 | 4.77572297 | -5.452555724 | 1.17E-07 | 3.38E-07 | 6.715246874 |
| MLXIPL  | 0.815846031  | 2.66390787 | 5.450882187  | 1.18E-07 | 3.41E-07 | 6.707077246 |
| PUDP    | -0.366457695 | 4.4065316  | -5.449885498 | 1.18E-07 | 3.43E-07 | 6.7022127   |
| IKZF3   | 0.766562485  | 2.6120552  | 5.449025305  | 1.19E-07 | 3.44E-07 | 6.698014915 |
| ZNF225  | -0.273552628 | 1.67581493 | -5.448564209 | 1.19E-07 | 3.45E-07 | 6.695764961 |
| DAAM2   | -0.76088467  | 2.86530064 | -5.448328308 | 1.19E-07 | 3.45E-07 | 6.694613917 |
| RTKN2   | 0.298534493  | 0.69633021 | 5.448119855  | 1.19E-07 | 3.46E-07 | 6.693596842 |
| ZCCHC9  | -0.340784443 | 3.5585632  | -5.447482817 | 1.20E-07 | 3.47E-07 | 6.690488811 |
| EFCAB5  | -0.128105726 | 0.30571698 | -5.446342586 | 1.20E-07 | 3.49E-07 | 6.684926479 |
| NEK1    | -0.432333901 | 2.95060746 | -5.446261956 | 1.21E-07 | 3.49E-07 | 6.684533181 |
| TFRC    | -0.555451613 | 3.95214711 | -5.444774224 | 1.21E-07 | 3.51E-07 | 6.677277127 |
| ZNF235  | -0.271948216 | 1.41902793 | -5.441935678 | 1.23E-07 | 3.56E-07 | 6.663437159 |
| PCARE   | -0.258908973 | 0.6515984  | -5.439422504 | 1.25E-07 | 3.61E-07 | 6.651188384 |
| PLXNA3  | 0.500890265  | 4.06370065 | 5.438074999  | 1.26E-07 | 3.63E-07 | 6.644622726 |
| CCNH    | -0.30538449  | 4.51273549 | -5.43805113  | 1.26E-07 | 3.63E-07 | 6.644506436 |
| SEC14L3 | -0.260617284 | 0.17602393 | -5.437670997 | 1.26E-07 | 3.64E-07 | 6.642654492 |
| TIAL1   | -0.305707654 | 4.97131357 | -5.437602085 | 1.26E-07 | 3.64E-07 | 6.642318776 |
| METTTL1 | -0.3024918   | 3.03407838 | -5.436405868 | 1.27E-07 | 3.66E-07 | 6.636491741 |
| LRR1Q4  | -0.072569259 | 0.09964173 | -5.436265286 | 1.27E-07 | 3.66E-07 | 6.635807005 |
| NCF4    | 0.69265707   | 3.12718701 | 5.435318772  | 1.27E-07 | 3.68E-07 | 6.631197138 |
| DLX4    | -0.35571031  | 0.67811795 | -5.434572357 | 1.28E-07 | 3.69E-07 | 6.627562278 |
| ORAI1   | -0.365915221 | 5.23068967 | -5.434382524 | 1.28E-07 | 3.69E-07 | 6.626637901 |
| SF3B2   | -0.338631244 | 6.48597411 | -5.434305108 | 1.28E-07 | 3.70E-07 | 6.626260938 |
| FAM111E | 0.690118343  | 2.19208818 | 5.433965288  | 1.28E-07 | 3.70E-07 | 6.624606292 |
| TMED8   | -0.43945521  | 4.12813564 | -5.432870061 | 1.29E-07 | 3.72E-07 | 6.619273989 |
| NOC2L   | -0.302431285 | 5.34138013 | -5.432336998 | 1.29E-07 | 3.73E-07 | 6.616678988 |
| AP2A2   | -0.269543616 | 4.21872462 | -5.431034313 | 1.30E-07 | 3.75E-07 | 6.610338243 |

|         |              |            |              |          |          |             |
|---------|--------------|------------|--------------|----------|----------|-------------|
| FDX2    | -0.380604074 | 3.36323    | -5.430111563 | 1.31E-07 | 3.77E-07 | 6.605847538 |
| ZNF248  | -0.365908499 | 3.22605448 | -5.429647016 | 1.31E-07 | 3.78E-07 | 6.60358698  |
| MNDA    | 0.733590787  | 3.1817518  | 5.428994564  | 1.31E-07 | 3.79E-07 | 6.600412304 |
| NEK9    | -0.371135744 | 4.62030009 | -5.427233441 | 1.33E-07 | 3.82E-07 | 6.591844605 |
| TTC26   | -0.352763534 | 2.82426771 | -5.426778113 | 1.33E-07 | 3.83E-07 | 6.589629833 |
| PSRC1   | -0.316681849 | 2.0081828  | -5.426611801 | 1.33E-07 | 3.83E-07 | 6.588820911 |
| FOSL2   | 0.651392471  | 5.13555903 | 5.425698576  | 1.34E-07 | 3.85E-07 | 6.584379426 |
| ANXA7   | -0.351782573 | 7.51188968 | -5.424836017 | 1.34E-07 | 3.87E-07 | 6.580184902 |
| NUFIP1  | -0.283987387 | 2.9896145  | -5.423739968 | 1.35E-07 | 3.89E-07 | 6.574855707 |
| MED27   | -0.323258868 | 4.74845989 | -5.421267163 | 1.37E-07 | 3.94E-07 | 6.562835605 |
| ELFN1   | -0.391308871 | 1.64300991 | -5.420112302 | 1.37E-07 | 3.96E-07 | 6.557223411 |
| UIMC1   | -0.3132862   | 3.91062885 | -5.419556397 | 1.38E-07 | 3.97E-07 | 6.554522256 |
| RBM27   | -0.286648707 | 2.84032015 | -5.417211563 | 1.39E-07 | 4.01E-07 | 6.543131079 |
| MSR1    | 0.655355642  | 2.37059752 | 5.416201461  | 1.40E-07 | 4.03E-07 | 6.538225223 |
| ACOT4   | -0.355630033 | 2.21786904 | -5.415839791 | 1.40E-07 | 4.04E-07 | 6.536468843 |
| CHMP1B  | -0.504923669 | 6.6319013  | -5.41577056  | 1.40E-07 | 4.04E-07 | 6.536132647 |
| TCEAL5  | -0.659109892 | 0.86437299 | -5.415357687 | 1.41E-07 | 4.05E-07 | 6.534127744 |
| CFAP161 | -0.385460447 | 0.56730821 | -5.41480248  | 1.41E-07 | 4.06E-07 | 6.53143186  |
| CLEC7A  | 0.59670968   | 2.00593105 | 5.41412062   | 1.42E-07 | 4.07E-07 | 6.528121293 |
| RNF113A | -0.266707085 | 4.99041187 | -5.413947949 | 1.42E-07 | 4.08E-07 | 6.527282996 |
| DEDD    | -0.270595736 | 5.09495348 | -5.412480263 | 1.43E-07 | 4.11E-07 | 6.520158394 |
| SMCO2   | 0.127741858  | 0.16104134 | 5.411266356  | 1.44E-07 | 4.13E-07 | 6.514266872 |
| CBY3    | -0.277438221 | 0.78029933 | -5.411080201 | 1.44E-07 | 4.13E-07 | 6.513363485 |
| HTRA1   | -0.548654705 | 6.97505166 | -5.410464511 | 1.44E-07 | 4.15E-07 | 6.510375807 |
| HAPLN2  | -0.266357356 | 0.3738591  | -5.408684728 | 1.46E-07 | 4.18E-07 | 6.501740805 |
| ZNF749  | -0.316574644 | 1.93599565 | -5.407151022 | 1.47E-07 | 4.21E-07 | 6.494301505 |
| ANTXRL  | -0.105630136 | 0.12387685 | -5.406311952 | 1.47E-07 | 4.23E-07 | 6.490232272 |
| B3GNT6  | 0.155412895  | 0.13061745 | 5.405788316  | 1.48E-07 | 4.24E-07 | 6.487693052 |
| IFI27   | -0.610759068 | 5.02990777 | -5.40558801  | 1.48E-07 | 4.24E-07 | 6.48672178  |
| MAP3K6  | 0.407366622  | 4.82160845 | 5.403842742  | 1.49E-07 | 4.28E-07 | 6.478260271 |
| TEKT2   | -0.62402862  | 2.14605768 | -5.403271381 | 1.50E-07 | 4.29E-07 | 6.47549064  |
| MUTYH   | -0.341968105 | 3.65176917 | -5.40305889  | 1.50E-07 | 4.30E-07 | 6.47446066  |
| MILR1   | 0.692932868  | 2.69590201 | 5.401998292  | 1.51E-07 | 4.32E-07 | 6.469320263 |
| FAM98B  | -0.349432942 | 4.04294904 | -5.401307654 | 1.51E-07 | 4.33E-07 | 6.465973381 |
| RNF180  | -0.441929714 | 3.56328613 | -5.401027756 | 1.51E-07 | 4.34E-07 | 6.464617073 |
| RAB30   | -0.458014078 | 2.71915245 | -5.399746707 | 1.52E-07 | 4.36E-07 | 6.458410168 |
| KIAA125 | -0.153234048 | 0.35079551 | -5.39703346  | 1.54E-07 | 4.42E-07 | 6.445267887 |
| SYF2    | -0.319335654 | 6.33721477 | -5.396662031 | 1.55E-07 | 4.43E-07 | 6.443469189 |
| RASGRF  | 0.561706576  | 1.16701714 | 5.395290421  | 1.56E-07 | 4.46E-07 | 6.436827818 |
| PEBP4   | -1.081090551 | 6.02702355 | -5.394194609 | 1.57E-07 | 4.48E-07 | 6.431522831 |



|          |              |            |              |          |          |             |
|----------|--------------|------------|--------------|----------|----------|-------------|
| SFXN3    | 0.422487924  | 4.81777558 | 5.394057936  | 1.57E-07 | 4.49E-07 | 6.430861236 |
| CXorf56  | -0.367480991 | 4.95420071 | -5.393095321 | 1.57E-07 | 4.51E-07 | 6.426201879 |
| LAMP5    | 1.297402122  | 2.97345419 | 5.391352504  | 1.59E-07 | 4.55E-07 | 6.41776778  |
| HNRNPL   | -0.289521677 | 5.57673894 | -5.390188452 | 1.60E-07 | 4.57E-07 | 6.412135738 |
| SMU1     | -0.312086092 | 5.06289918 | -5.389852608 | 1.60E-07 | 4.58E-07 | 6.410510997 |
| SMPD4    | -0.367404673 | 4.61419238 | -5.388765515 | 1.61E-07 | 4.60E-07 | 6.405252439 |
| TBX6     | -0.358820159 | 1.55626548 | -5.388190673 | 1.61E-07 | 4.62E-07 | 6.402472118 |
| SPRR1B   | 0.676614756  | 0.64046033 | 5.387292289  | 1.62E-07 | 4.64E-07 | 6.398127398 |
| RAB11FI  | 0.866934737  | 3.74404476 | 5.387064685  | 1.62E-07 | 4.64E-07 | 6.397026762 |
| ABCB10   | -0.399935664 | 3.29818896 | -5.386709553 | 1.62E-07 | 4.65E-07 | 6.395309507 |
| FRMPD2   | -0.436878017 | 0.84012862 | -5.386561626 | 1.63E-07 | 4.65E-07 | 6.394594226 |
| UBTD2    | -0.361383797 | 4.54521276 | -5.38635097  | 1.63E-07 | 4.65E-07 | 6.393575656 |
| PPP1R2   | -0.368216338 | 5.67539309 | -5.385310798 | 1.64E-07 | 4.68E-07 | 6.388546648 |
| TADA1    | -0.337805473 | 3.53276906 | -5.385106015 | 1.64E-07 | 4.68E-07 | 6.387556661 |
| APOL4    | 0.639860715  | 1.96354475 | 5.384853781  | 1.64E-07 | 4.69E-07 | 6.386337317 |
| PFDN4    | -0.271992259 | 4.23916152 | -5.384773476 | 1.64E-07 | 4.69E-07 | 6.385949117 |
| AK4      | 0.467220344  | 2.12140875 | 5.38471665   | 1.64E-07 | 4.69E-07 | 6.385674422 |
| MPZ      | -0.345782071 | 1.59950741 | -5.384599078 | 1.64E-07 | 4.69E-07 | 6.385106082 |
| FFAR4    | 0.3128287    | 0.64202084 | 5.384369332  | 1.64E-07 | 4.70E-07 | 6.383995535 |
| KRI1     | -0.327931106 | 4.7142359  | -5.384112499 | 1.65E-07 | 4.70E-07 | 6.382754091 |
| PGAM5    | -0.304022323 | 4.58180107 | -5.383666138 | 1.65E-07 | 4.71E-07 | 6.38059665  |
| FGD5     | -0.464737087 | 3.31267495 | -5.382834816 | 1.66E-07 | 4.73E-07 | 6.376578925 |
| CTR9     | -0.420074557 | 5.20877453 | -5.381183668 | 1.67E-07 | 4.77E-07 | 6.36860049  |
| NOX4     | 0.506266753  | 1.84677863 | 5.380604597  | 1.68E-07 | 4.78E-07 | 6.365802846 |
| ZCCHC7   | -0.311882639 | 4.08143579 | -5.380036908 | 1.68E-07 | 4.79E-07 | 6.363060427 |
| GIPC2    | -0.27914002  | 0.97768382 | -5.379046713 | 1.69E-07 | 4.82E-07 | 6.358277502 |
| CD68     | 0.42757885   | 0.90344266 | 5.378879597  | 1.69E-07 | 4.82E-07 | 6.357470351 |
| FAM207I  | -0.355670687 | 4.14396402 | -5.378814155 | 1.69E-07 | 4.82E-07 | 6.357154278 |
| GGACT    | -0.308146407 | 2.3431782  | -5.377475538 | 1.70E-07 | 4.85E-07 | 6.35068971  |
| CFAP45   | -0.346438427 | 0.85565213 | -5.377062854 | 1.70E-07 | 4.86E-07 | 6.348696995 |
| TRABD    | -0.383723045 | 5.07063709 | -5.37699342  | 1.71E-07 | 4.86E-07 | 6.348361732 |
| TRIM39-I | -0.311055911 | 2.96920574 | -5.376486295 | 1.71E-07 | 4.87E-07 | 6.34591319  |
| RHBDD2   | -0.371477585 | 8.36734438 | -5.375160881 | 1.72E-07 | 4.90E-07 | 6.339514577 |
| SLC6A3   | -0.294305627 | 0.35518919 | -5.373610303 | 1.73E-07 | 4.94E-07 | 6.332030555 |
| SLC25A4  | -0.365403737 | 3.88884783 | -5.372513928 | 1.74E-07 | 4.97E-07 | 6.326739825 |
| TOP1MT   | -0.320509806 | 4.11084883 | -5.371881279 | 1.75E-07 | 4.98E-07 | 6.32368727  |
| GPRASP   | -0.493140618 | 4.54353129 | -5.371216978 | 1.76E-07 | 5.00E-07 | 6.320482302 |
| ARMCX5   | -0.493140618 | 4.54353129 | -5.371216978 | 1.76E-07 | 5.00E-07 | 6.320482302 |
| TOX4     | -0.334735741 | 5.07063061 | -5.37042807  | 1.76E-07 | 5.02E-07 | 6.316676569 |
| P4HA1    | -0.440988194 | 5.19789721 | -5.369873761 | 1.77E-07 | 5.03E-07 | 6.314002817 |

|         |              |            |              |          |          |             |
|---------|--------------|------------|--------------|----------|----------|-------------|
| SLC9A2  | -0.462566422 | 1.29125361 | -5.369681923 | 1.77E-07 | 5.03E-07 | 6.313077522 |
| DTNBP1  | -0.322259088 | 4.66328269 | -5.369206813 | 1.77E-07 | 5.04E-07 | 6.310786037 |
| TMEM18  | -0.417513638 | 4.86753671 | -5.369134605 | 1.77E-07 | 5.05E-07 | 6.310437784 |
| AXL     | 0.578299793  | 4.56589693 | 5.367653665  | 1.79E-07 | 5.08E-07 | 6.303296223 |
| FAM126F | -0.324463286 | 2.54300639 | -5.367576521 | 1.79E-07 | 5.08E-07 | 6.302924254 |
| PPOX    | -0.313019423 | 3.51354089 | -5.366579701 | 1.80E-07 | 5.11E-07 | 6.298118216 |
| RASL10E | -0.476146229 | 1.17482707 | -5.366287984 | 1.80E-07 | 5.11E-07 | 6.296711873 |
| PPP1R14 | -0.595266091 | 2.70829326 | -5.366202537 | 1.80E-07 | 5.12E-07 | 6.296299949 |
| MAPK12  | -0.329625597 | 1.30149325 | -5.365927235 | 1.80E-07 | 5.12E-07 | 6.294972819 |
| SERGEF  | -0.656863019 | 5.6078403  | -5.365871527 | 1.80E-07 | 5.12E-07 | 6.294704274 |
| LAS1L   | -0.247355393 | 4.67878668 | -5.365122775 | 1.81E-07 | 5.14E-07 | 6.29109511  |
| PCSK4   | -0.431003894 | 2.0426137  | -5.364844217 | 1.81E-07 | 5.15E-07 | 6.289752495 |
| ZNF530  | -0.199566718 | 1.31983283 | -5.364498897 | 1.82E-07 | 5.15E-07 | 6.288088172 |
| TTC9C   | -0.269843821 | 4.33445278 | -5.364477094 | 1.82E-07 | 5.15E-07 | 6.287983094 |
| ZNF584  | -0.278276439 | 3.15487875 | -5.36417466  | 1.82E-07 | 5.16E-07 | 6.286525543 |
| TTLL9   | -0.201037746 | 0.4712154  | -5.363583611 | 1.82E-07 | 5.18E-07 | 6.283677227 |
| CLIC2   | -0.449957025 | 5.81808626 | -5.363422515 | 1.82E-07 | 5.18E-07 | 6.282900938 |
| ABR     | 0.425008886  | 4.79838208 | 5.362527972  | 1.83E-07 | 5.20E-07 | 6.278590638 |
| CNTN2   | -0.127162264 | 0.13690848 | -5.362204291 | 1.84E-07 | 5.21E-07 | 6.277031146 |
| ESM1    | -0.995194525 | 3.84477688 | -5.361944276 | 1.84E-07 | 5.21E-07 | 6.275778447 |
| SMAD2   | -0.312473223 | 3.43176264 | -5.361175836 | 1.85E-07 | 5.23E-07 | 6.272076545 |
| ALG9    | -0.277270825 | 2.11282099 | -5.360319115 | 1.85E-07 | 5.26E-07 | 6.267949857 |
| JAKMIP3 | -0.232974145 | 0.3225542  | -5.356978218 | 1.88E-07 | 5.34E-07 | 6.251862316 |
| TREH    | -0.474182913 | 0.69234587 | -5.356572345 | 1.89E-07 | 5.35E-07 | 6.249908447 |
| TMEM87  | -0.526197802 | 6.28229573 | -5.356491131 | 1.89E-07 | 5.35E-07 | 6.249517499 |
| ETF1    | -0.384027791 | 6.07474257 | -5.356086746 | 1.89E-07 | 5.36E-07 | 6.247570931 |
| ABCA12  | 0.177570529  | 0.26540059 | 5.354762326  | 1.91E-07 | 5.40E-07 | 6.241196469 |
| WFIKK1  | -0.242380971 | 0.44737469 | -5.354523205 | 1.91E-07 | 5.40E-07 | 6.240045704 |
| TRAF4   | -0.364535005 | 5.23087815 | -5.353946529 | 1.91E-07 | 5.42E-07 | 6.237270643 |
| RPP21   | -0.332609584 | 3.86233057 | -5.353862665 | 1.91E-07 | 5.42E-07 | 6.236867094 |
| SLC9A5  | 0.426375791  | 1.41787206 | 5.351983437  | 1.93E-07 | 5.47E-07 | 6.227825695 |
| RETN    | 0.844594969  | 1.24045169 | 5.351827208  | 1.93E-07 | 5.47E-07 | 6.227074155 |
| HSPA8   | -0.650714453 | 8.66945042 | -5.351711057 | 1.93E-07 | 5.48E-07 | 6.226515421 |
| ANGPT4  | -0.49395216  | 0.99984138 | -5.351459588 | 1.94E-07 | 5.48E-07 | 6.225305786 |
| NFYB    | -0.311673187 | 4.15374381 | -5.350747106 | 1.94E-07 | 5.50E-07 | 6.221878804 |
| WTIP    | 0.575743046  | 2.80061718 | 5.350738565  | 1.94E-07 | 5.50E-07 | 6.221837725 |
| PRSS8   | -0.488803798 | 7.13591915 | -5.349564492 | 1.96E-07 | 5.53E-07 | 6.21619132  |
| TMEM39  | -0.309437973 | 4.57128872 | -5.348555869 | 1.96E-07 | 5.56E-07 | 6.211341397 |
| WDR12   | -0.296609875 | 2.81760836 | -5.347881104 | 1.97E-07 | 5.57E-07 | 6.208097226 |
| GTF2B   | -0.320461107 | 5.33884574 | -5.347836132 | 1.97E-07 | 5.58E-07 | 6.207881017 |

|         |              |            |              |          |          |             |
|---------|--------------|------------|--------------|----------|----------|-------------|
| DLGAP1  | -0.39811955  | 0.64905145 | -5.347179635 | 1.98E-07 | 5.59E-07 | 6.204725008 |
| DIP2C   | -0.464965813 | 2.94647967 | -5.345325367 | 2.00E-07 | 5.64E-07 | 6.19581257  |
| LAPTM4I | -0.48322021  | 6.0474733  | -5.344541587 | 2.00E-07 | 5.66E-07 | 6.192046116 |
| SLC7A6C | -0.27920902  | 1.87423046 | -5.343115055 | 2.02E-07 | 5.70E-07 | 6.185192051 |
| UBA52   | -0.326368553 | 8.12916489 | -5.342983968 | 2.02E-07 | 5.71E-07 | 6.184562294 |
| RFC2    | -0.273725518 | 4.80536812 | -5.342723023 | 2.02E-07 | 5.71E-07 | 6.183308713 |
| SCGB2B  | -0.232879878 | 0.86673201 | -5.342681449 | 2.02E-07 | 5.71E-07 | 6.183108992 |
| PPL     | 0.867196227  | 6.50538612 | 5.342466166  | 2.03E-07 | 5.72E-07 | 6.182074817 |
| PNMA6A  | -0.663823219 | 2.34599193 | -5.341589903 | 2.03E-07 | 5.74E-07 | 6.177865762 |
| NCMAP   | -0.691779161 | 3.94195809 | -5.340641085 | 2.04E-07 | 5.77E-07 | 6.17330882  |
| ZNF706  | -0.247233727 | 4.66308786 | -5.339917213 | 2.05E-07 | 5.79E-07 | 6.169832674 |
| SERPINI | -0.522126911 | 0.44503888 | -5.339340976 | 2.06E-07 | 5.80E-07 | 6.167065766 |
| TPD52L2 | -0.260448381 | 6.07468436 | -5.339232376 | 2.06E-07 | 5.81E-07 | 6.166544327 |
| STXBP1  | -0.442676501 | 4.67969794 | -5.338996825 | 2.06E-07 | 5.81E-07 | 6.165413371 |
| CIPC    | -0.459498727 | 4.54123894 | -5.337527885 | 2.08E-07 | 5.85E-07 | 6.158361421 |
| PLEKHA  | 0.957929179  | 5.80512496 | 5.336847396  | 2.08E-07 | 5.87E-07 | 6.15509512  |
| NUAK1   | -0.436235137 | 2.48025258 | -5.336808091 | 2.08E-07 | 5.87E-07 | 6.154906465 |
| NCKAP1  | 0.639452887  | 2.11789861 | 5.334865855  | 2.10E-07 | 5.93E-07 | 6.145585744 |
| SAMD14  | -0.211634736 | 0.71368414 | -5.334479283 | 2.11E-07 | 5.94E-07 | 6.143730926 |
| TRIM28  | -0.324395431 | 7.62806942 | -5.333639029 | 2.12E-07 | 5.96E-07 | 6.139699647 |
| PPP1R2  | -0.510878856 | 5.50689835 | -5.333417037 | 2.12E-07 | 5.97E-07 | 6.138634686 |
| SIX5    | -0.486640848 | 3.88399033 | -5.333147664 | 2.12E-07 | 5.97E-07 | 6.137342469 |
| ZNF595  | -0.295161865 | 2.73026307 | -5.333125794 | 2.12E-07 | 5.97E-07 | 6.137237555 |
| ZNF382  | -0.2327366   | 1.36336696 | -5.33264302  | 2.13E-07 | 5.99E-07 | 6.134921765 |
| ZNF546  | -0.295484219 | 1.56105499 | -5.332349518 | 2.13E-07 | 6.00E-07 | 6.133513964 |
| CD52    | 1.043105357  | 5.04322861 | 5.331726568  | 2.14E-07 | 6.01E-07 | 6.130526154 |
| AKR1C2  | -0.708338781 | 0.75872695 | -5.331299291 | 2.14E-07 | 6.02E-07 | 6.128476995 |
| MAT2A   | -0.638874113 | 6.78032717 | -5.331228313 | 2.14E-07 | 6.03E-07 | 6.128136607 |
| YARS    | -0.344107314 | 5.02474274 | -5.331170607 | 2.14E-07 | 6.03E-07 | 6.127859871 |
| NBL1    | 0.867864837  | 4.34545099 | 5.331150117  | 2.14E-07 | 6.03E-07 | 6.127761609 |
| MICOS1  | 0.867864837  | 4.34545099 | 5.331150117  | 2.14E-07 | 6.03E-07 | 6.127761609 |
| DNAJC2  | -0.277377179 | 3.75714296 | -5.331066355 | 2.14E-07 | 6.03E-07 | 6.127359923 |
| RECK    | -0.34686461  | 2.52850241 | -5.331030648 | 2.14E-07 | 6.03E-07 | 6.127188687 |
| TRMT11  | -0.333119354 | 8.14255682 | -5.330960292 | 2.14E-07 | 6.03E-07 | 6.126851297 |
| PDCD7   | -0.32884406  | 4.67853311 | -5.330611838 | 2.15E-07 | 6.04E-07 | 6.125180343 |
| TVP23C  | -0.147072249 | 0.37432292 | -5.329824688 | 2.16E-07 | 6.06E-07 | 6.121406018 |
| LPAR5   | 1.128751993  | 5.04886562 | 5.329121669  | 2.16E-07 | 6.08E-07 | 6.118035473 |
| DDX20   | -0.312324623 | 3.12101821 | -5.328993462 | 2.17E-07 | 6.08E-07 | 6.117420835 |
| FAU     | -0.358106735 | 9.42380721 | -5.328824902 | 2.17E-07 | 6.09E-07 | 6.11661276  |
| HINFP   | -0.259237009 | 2.81111298 | -5.328287134 | 2.17E-07 | 6.10E-07 | 6.114034846 |

|          |              |            |              |          |          |             |
|----------|--------------|------------|--------------|----------|----------|-------------|
| ZNF790   | -0.299154929 | 2.58275847 | -5.32760473  | 2.18E-07 | 6.12E-07 | 6.110763885 |
| HEXA     | -0.291081512 | 4.88210552 | -5.326833026 | 2.19E-07 | 6.14E-07 | 6.10706529  |
| PRPF3    | -0.350170046 | 4.40811719 | -5.324806676 | 2.21E-07 | 6.21E-07 | 6.097355501 |
| PSEN2    | -0.28765807  | 4.07544778 | -5.32415556  | 2.22E-07 | 6.22E-07 | 6.094236138 |
| CHURC1   | -0.428666952 | 4.6777735  | -5.324046035 | 2.22E-07 | 6.23E-07 | 6.093711459 |
| EIF5B    | -0.326963638 | 5.78267772 | -5.32302013  | 2.23E-07 | 6.26E-07 | 6.088797255 |
| FBL      | -0.335688482 | 7.17865063 | -5.32262434  | 2.23E-07 | 6.27E-07 | 6.086901578 |
| MAFA     | -0.526584803 | 0.60363842 | -5.322391695 | 2.24E-07 | 6.27E-07 | 6.085787353 |
| HLA-DR/  | 1.021577015  | 9.77849659 | 5.321923243  | 2.24E-07 | 6.29E-07 | 6.083543877 |
| NEK10    | -0.087909375 | 0.17025419 | -5.321503799 | 2.25E-07 | 6.30E-07 | 6.08153524  |
| RPS16    | -0.33018831  | 9.39267269 | -5.319546258 | 2.27E-07 | 6.36E-07 | 6.072162632 |
| ZBED1    | -0.351523111 | 5.06251034 | -5.316532666 | 2.30E-07 | 6.46E-07 | 6.057739101 |
| BTRC     | -0.354356049 | 3.80944276 | -5.315966597 | 2.31E-07 | 6.47E-07 | 6.055030533 |
| DUSP1    | -0.8785133   | 9.12752736 | -5.315395918 | 2.32E-07 | 6.49E-07 | 6.052300142 |
| DNAJC1   | -0.372364856 | 3.96670409 | -5.315179125 | 2.32E-07 | 6.50E-07 | 6.051262964 |
| KIF16B   | -0.445481418 | 3.40966223 | -5.314738025 | 2.32E-07 | 6.51E-07 | 6.04915277  |
| HOMER3   | -0.380121975 | 5.23737751 | -5.313682982 | 2.34E-07 | 6.54E-07 | 6.044106076 |
| HYDIN    | -0.219681349 | 0.52749402 | -5.313424919 | 2.34E-07 | 6.55E-07 | 6.042871778 |
| HHIPL2   | -0.786876546 | 0.86531774 | -5.312688135 | 2.35E-07 | 6.57E-07 | 6.039348055 |
| RUSC1    | -0.323510787 | 3.70332269 | -5.312406482 | 2.35E-07 | 6.58E-07 | 6.038001133 |
| GLB1     | -0.444461715 | 6.28750954 | -5.312310876 | 2.35E-07 | 6.58E-07 | 6.037543941 |
| RRN3     | -0.344000839 | 4.99848822 | -5.3123081   | 2.35E-07 | 6.58E-07 | 6.037530665 |
| CCDC92   | -0.269032829 | 4.71210721 | -5.312256406 | 2.35E-07 | 6.58E-07 | 6.037283466 |
| TTC39C   | 0.395926573  | 1.4951687  | 5.311629031  | 2.36E-07 | 6.60E-07 | 6.034283505 |
| GYS2     | -0.120651898 | 0.14907866 | -5.311195192 | 2.36E-07 | 6.61E-07 | 6.032209152 |
| SEC22B   | -0.34808401  | 3.89439416 | -5.30929532  | 2.39E-07 | 6.67E-07 | 6.02312673  |
| PGM2     | -0.425032754 | 4.30144461 | -5.308862379 | 2.39E-07 | 6.69E-07 | 6.021057401 |
| CPXM1    | -1.274028955 | 3.89618108 | -5.308168953 | 2.40E-07 | 6.71E-07 | 6.017743313 |
| C1orf189 | -0.245709934 | 0.406007   | -5.307088524 | 2.41E-07 | 6.74E-07 | 6.012580313 |
| TMEM10   | 1.128103141  | 2.71939401 | 5.306370528  | 2.42E-07 | 6.77E-07 | 6.009149721 |
| DISC1    | -0.252895772 | 1.30450738 | -5.306325985 | 2.42E-07 | 6.77E-07 | 6.008936909 |
| CPSF3    | -0.285561349 | 4.97633075 | -5.305076239 | 2.44E-07 | 6.81E-07 | 6.00296654  |
| HLA-DP/  | 1.025951123  | 6.46431722 | 5.304912908  | 2.44E-07 | 6.81E-07 | 6.002186345 |
| ZNF570   | -0.299601939 | 2.4029555  | -5.304646734 | 2.44E-07 | 6.82E-07 | 6.000914939 |
| MXRA5    | 0.760446658  | 5.15879735 | 5.304265757  | 2.45E-07 | 6.83E-07 | 5.999095251 |
| DYDC2    | -0.141776218 | 0.23250807 | -5.30143477  | 2.48E-07 | 6.93E-07 | 5.985576696 |
| KRIT1    | -0.441327195 | 4.16262834 | -5.301234801 | 2.48E-07 | 6.93E-07 | 5.984622022 |
| TACR3    | -0.067902725 | 0.05087253 | -5.300666496 | 2.49E-07 | 6.95E-07 | 5.981909025 |
| C16orf87 | -0.247193429 | 1.86050621 | -5.300531117 | 2.49E-07 | 6.96E-07 | 5.981262779 |
| SEMA7A   | 0.528048064  | 1.82285436 | 5.300392502  | 2.49E-07 | 6.96E-07 | 5.980601103 |

|         |              |            |              |          |          |             |
|---------|--------------|------------|--------------|----------|----------|-------------|
| HIST4H4 | -0.361380295 | 1.30874618 | -5.299779331 | 2.50E-07 | 6.98E-07 | 5.977674308 |
| DENND2  | -0.461549732 | 1.52884267 | -5.298881638 | 2.51E-07 | 7.01E-07 | 5.973389914 |
| WRAP73  | -0.241093541 | 3.12568395 | -5.298407678 | 2.52E-07 | 7.02E-07 | 5.971128095 |
| RPL23A  | -0.337995154 | 8.64980093 | -5.297837388 | 2.53E-07 | 7.04E-07 | 5.968406785 |
| GLTP    | -0.275487504 | 6.60751105 | -5.29766807  | 2.53E-07 | 7.05E-07 | 5.967598882 |
| SMS     | -0.337907727 | 6.43509211 | -5.296964369 | 2.54E-07 | 7.07E-07 | 5.964241372 |
| SLC25A2 | -0.61469419  | 3.84673659 | -5.296891618 | 2.54E-07 | 7.07E-07 | 5.963894283 |
| FAM13C  | -0.377174959 | 1.12981005 | -5.294574263 | 2.57E-07 | 7.15E-07 | 5.95284033  |
| ZNF268  | -0.306356801 | 2.84116264 | -5.294334494 | 2.57E-07 | 7.16E-07 | 5.951696836 |
| ERICH4  | -0.106049829 | 0.15902628 | -5.293306064 | 2.58E-07 | 7.19E-07 | 5.946792572 |
| OSBP    | -0.403802263 | 5.64251459 | -5.291545343 | 2.61E-07 | 7.26E-07 | 5.938398013 |
| BRCC3   | -0.367919183 | 4.49835062 | -5.29097622  | 2.61E-07 | 7.28E-07 | 5.935685092 |
| PITRM1  | -0.305925217 | 4.69979025 | -5.290705504 | 2.62E-07 | 7.28E-07 | 5.934394718 |
| LIPC    | -0.403476942 | 0.62321995 | -5.289986182 | 2.63E-07 | 7.31E-07 | 5.930966298 |
| ACBD7   | 0.845110433  | 2.42689966 | 5.289604078  | 2.63E-07 | 7.32E-07 | 5.929145275 |
| JPH2    | -0.396418638 | 0.99714098 | -5.289510638 | 2.63E-07 | 7.32E-07 | 5.928699977 |
| PSG8    | 0.804148191  | 0.76053877 | 5.289385148  | 2.63E-07 | 7.33E-07 | 5.928101947 |
| NSUN2   | -0.297624842 | 4.74516238 | -5.289254224 | 2.63E-07 | 7.33E-07 | 5.927478038 |
| GRK4    | -0.331500484 | 2.57677889 | -5.289076948 | 2.64E-07 | 7.34E-07 | 5.926633261 |
| ARHGEF  | -0.516285708 | 4.85211921 | -5.288333707 | 2.65E-07 | 7.36E-07 | 5.923091723 |
| IFIT2   | 0.605614983  | 3.78278741 | 5.288187775  | 2.65E-07 | 7.36E-07 | 5.922396405 |
| TNS1    | -0.516222303 | 5.35851577 | -5.287924163 | 2.65E-07 | 7.37E-07 | 5.921140417 |
| EPHA4   | 0.883537536  | 4.86587328 | 5.287470569  | 2.66E-07 | 7.39E-07 | 5.918979373 |
| SLC35F6 | -0.338474353 | 5.893059   | -5.286603748 | 2.67E-07 | 7.42E-07 | 5.914850025 |
| COL7A1  | 0.651935412  | 1.29959368 | 5.28616626   | 2.68E-07 | 7.43E-07 | 5.912766127 |
| SLC35A2 | -0.363338289 | 4.85653348 | -5.285595386 | 2.68E-07 | 7.45E-07 | 5.910047085 |
| EVI5L   | -0.289700882 | 3.81705807 | -5.284094554 | 2.70E-07 | 7.51E-07 | 5.902899815 |
| SPRYD3  | -0.412015294 | 6.76764948 | -5.283932083 | 2.70E-07 | 7.51E-07 | 5.902126194 |
| CELF1   | -0.31247269  | 4.95325477 | -5.281552314 | 2.74E-07 | 7.60E-07 | 5.89079687  |
| KLHDC1  | -0.433386897 | 2.76061913 | -5.281544788 | 2.74E-07 | 7.60E-07 | 5.890761047 |
| INO80C  | -0.316244442 | 3.3149741  | -5.279173452 | 2.77E-07 | 7.69E-07 | 5.879475954 |
| DNAJC11 | -0.324780915 | 3.32025787 | -5.278805927 | 2.77E-07 | 7.70E-07 | 5.877727283 |
| PIP     | -0.560268433 | 0.56938731 | -5.278418629 | 2.78E-07 | 7.71E-07 | 5.875884641 |
| BIN3    | -0.318719742 | 3.33076036 | -5.278344706 | 2.78E-07 | 7.71E-07 | 5.87553295  |
| NAA30   | -0.366598398 | 3.48735046 | -5.278023451 | 2.78E-07 | 7.73E-07 | 5.874004616 |
| CYP4V2  | -0.380599505 | 3.93669012 | -5.276986321 | 2.80E-07 | 7.76E-07 | 5.869071098 |
| LRP6    | -0.431403835 | 3.54824413 | -5.276855065 | 2.80E-07 | 7.77E-07 | 5.868446783 |
| SARNP   | -0.228532957 | 1.84863925 | -5.276110775 | 2.81E-07 | 7.79E-07 | 5.864906828 |
| PLEKHH  | -0.660722918 | 4.6513764  | -5.276046315 | 2.81E-07 | 7.80E-07 | 5.864600262 |
| CTSZ    | -0.398287569 | 8.02850181 | -5.275914841 | 2.81E-07 | 7.80E-07 | 5.863974998 |

|         |              |            |              |          |          |             |
|---------|--------------|------------|--------------|----------|----------|-------------|
| CNPY3   | -0.335805364 | 7.20490639 | -5.27564019  | 2.82E-07 | 7.81E-07 | 5.86266886  |
| SMAD9   | -0.767673386 | 4.14919082 | -5.275517971 | 2.82E-07 | 7.81E-07 | 5.862087648 |
| DMRTC1  | -0.082798707 | 0.12077001 | -5.275335135 | 2.82E-07 | 7.82E-07 | 5.86121819  |
| B4GALN  | 0.70531674   | 3.68762967 | 5.273016877  | 2.85E-07 | 7.91E-07 | 5.85019607  |
| TPD52   | -0.358446293 | 5.3003201  | -5.272967452 | 2.85E-07 | 7.91E-07 | 5.849961125 |
| TBC1D8  | -0.3639126   | 2.49258838 | -5.271191649 | 2.88E-07 | 7.97E-07 | 5.841520792 |
| THUMPC  | -0.387767307 | 5.12454394 | -5.271126035 | 2.88E-07 | 7.98E-07 | 5.841208974 |
| PPARG   | -0.634300613 | 2.57920757 | -5.270792352 | 2.89E-07 | 7.99E-07 | 5.839623262 |
| TSC2    | -0.345161598 | 4.92645153 | -5.26994568  | 2.90E-07 | 8.02E-07 | 5.835600109 |
| RPL34   | -0.388842182 | 8.85471841 | -5.269918145 | 2.90E-07 | 8.02E-07 | 5.835469282 |
| RAB6A   | -0.386010859 | 6.38275292 | -5.269908839 | 2.90E-07 | 8.02E-07 | 5.835425066 |
| CXorf65 | 0.264772012  | 0.36880183 | 5.269296546  | 2.91E-07 | 8.04E-07 | 5.832515954 |
| ADSL    | -0.307442303 | 4.58736745 | -5.26870983  | 2.92E-07 | 8.06E-07 | 5.829728623 |
| ADCY4   | -0.435565702 | 2.53352967 | -5.268703074 | 2.92E-07 | 8.06E-07 | 5.829696527 |
| MCMDC2  | -0.144639364 | 0.61902382 | -5.268084561 | 2.92E-07 | 8.09E-07 | 5.826758408 |
| MBD1    | -0.310035569 | 4.74493499 | -5.2679981   | 2.93E-07 | 8.09E-07 | 5.826347714 |
| OMA1    | -0.319953281 | 4.23650824 | -5.265939744 | 2.96E-07 | 8.17E-07 | 5.816572044 |
| HNRNPK  | -0.35280639  | 8.24566784 | -5.265199773 | 2.97E-07 | 8.20E-07 | 5.813058479 |
| CLDN9   | 1.040113018  | 3.64020602 | 5.264814282  | 2.97E-07 | 8.21E-07 | 5.811228226 |
| CDC16   | -0.262679928 | 5.79447033 | -5.261759398 | 3.02E-07 | 8.33E-07 | 5.796727937 |
| FRMPD1  | -0.132370819 | 0.19923603 | -5.26169629  | 3.02E-07 | 8.33E-07 | 5.796428461 |
| KAT14   | -0.322006687 | 4.12986157 | -5.261516436 | 3.02E-07 | 8.34E-07 | 5.795574986 |
| CENPJ   | -0.601541486 | 2.5467732  | -5.260783402 | 3.03E-07 | 8.37E-07 | 5.792096708 |
| NLRX1   | -0.329363967 | 4.26618468 | -5.260112025 | 3.04E-07 | 8.40E-07 | 5.788911335 |
| ZGPAT   | -0.310421808 | 2.70219476 | -5.260012126 | 3.04E-07 | 8.40E-07 | 5.788437392 |
| MUC20   | 0.660398912  | 2.91676012 | 5.259582586  | 3.05E-07 | 8.42E-07 | 5.786399625 |
| SIRT3   | -0.341913994 | 4.24595975 | -5.259250722 | 3.05E-07 | 8.43E-07 | 5.784825333 |
| NXP3    | -0.351978572 | 1.27519474 | -5.258771119 | 3.06E-07 | 8.45E-07 | 5.782550339 |
| SNX20   | 0.57928306   | 1.37682784 | 5.258681839  | 3.06E-07 | 8.45E-07 | 5.782126859 |
| IP6K2   | -0.392469611 | 5.53328615 | -5.258466123 | 3.07E-07 | 8.46E-07 | 5.781103683 |
| BLZF1   | -0.356871083 | 4.23039771 | -5.258349756 | 3.07E-07 | 8.46E-07 | 5.780551745 |
| TRIM26  | -0.312325215 | 5.50999132 | -5.258117588 | 3.07E-07 | 8.47E-07 | 5.779450589 |
| AKAP17L | -0.396784234 | 5.23516364 | -5.258006909 | 3.07E-07 | 8.47E-07 | 5.778925659 |
| PAFAH1I | -0.391348885 | 5.73940218 | -5.257811615 | 3.08E-07 | 8.48E-07 | 5.77799944  |
| REEP4   | -0.304478741 | 4.83385788 | -5.257213745 | 3.08E-07 | 8.50E-07 | 5.775164101 |
| MMP9    | 1.157344754  | 4.2928653  | 5.256884973  | 3.09E-07 | 8.51E-07 | 5.773605041 |
| ERBB4   | -0.563820164 | 1.21382015 | -5.256181789 | 3.10E-07 | 8.54E-07 | 5.770270757 |
| ERCC3   | -0.309478746 | 4.20880823 | -5.256090682 | 3.10E-07 | 8.54E-07 | 5.769838783 |
| MIA3    | -0.39134509  | 4.41780954 | -5.255945417 | 3.10E-07 | 8.55E-07 | 5.769150034 |
| SCCPDH  | -0.353967542 | 5.98444301 | -5.254023387 | 3.13E-07 | 8.63E-07 | 5.760038515 |

|          |              |            |              |          |          |             |
|----------|--------------|------------|--------------|----------|----------|-------------|
| PTER     | -0.421609968 | 3.96852532 | -5.254011691 | 3.13E-07 | 8.63E-07 | 5.759983079 |
| RNF157   | -0.59046141  | 1.41184915 | -5.252413666 | 3.16E-07 | 8.69E-07 | 5.752409583 |
| C14orf11 | -0.303203268 | 5.7686488  | -5.251864978 | 3.17E-07 | 8.72E-07 | 5.749809619 |
| EFHC1    | -0.453520658 | 3.50419036 | -5.251789527 | 3.17E-07 | 8.72E-07 | 5.749452112 |
| DSN1     | -0.284816841 | 4.00912758 | -5.251699658 | 3.17E-07 | 8.72E-07 | 5.749026296 |
| RASSF1   | -0.306687617 | 4.00385332 | -5.251590173 | 3.17E-07 | 8.72E-07 | 5.74850754  |
| DUOXA1   | -0.612432231 | 6.34353112 | -5.25043724  | 3.19E-07 | 8.77E-07 | 5.7430453   |
| SPAG5    | -0.562284441 | 2.31363535 | -5.25011901  | 3.19E-07 | 8.78E-07 | 5.741537798 |
| TULP4    | -0.324808771 | 3.55387552 | -5.249581862 | 3.20E-07 | 8.80E-07 | 5.738993413 |
| MYEOV    | 0.454908042  | 0.73511232 | 5.249267671  | 3.21E-07 | 8.82E-07 | 5.737505237 |
| ZNF79    | -0.327451009 | 3.05786718 | -5.249023483 | 3.21E-07 | 8.83E-07 | 5.73634868  |
| HCK      | 0.712372499  | 3.0839645  | 5.248713368  | 3.22E-07 | 8.84E-07 | 5.734879935 |
| FN3K     | -0.318695424 | 4.44061491 | -5.247909864 | 3.23E-07 | 8.87E-07 | 5.731074761 |
| NEPRO    | -0.326839636 | 4.43307468 | -5.2467255   | 3.25E-07 | 8.92E-07 | 5.72546679  |
| ZNF408   | -0.281807581 | 3.75820176 | -5.246506312 | 3.25E-07 | 8.93E-07 | 5.72442905  |
| SH3GL2   | -0.818776611 | 1.06148909 | -5.246501018 | 3.25E-07 | 8.93E-07 | 5.724403985 |
| EPC1     | -0.341228968 | 3.49840341 | -5.246077132 | 3.26E-07 | 8.95E-07 | 5.722397201 |
| GJC1     | -0.528648267 | 2.31774187 | -5.244813417 | 3.28E-07 | 9.00E-07 | 5.716415225 |
| RP1      | 0.094171336  | 0.07777038 | 5.244630141  | 3.28E-07 | 9.01E-07 | 5.715547755 |
| PLEKHB   | -0.464532208 | 6.0778414  | -5.244337599 | 3.29E-07 | 9.02E-07 | 5.714163172 |
| UTP15    | -0.251930723 | 2.70613957 | -5.244111733 | 3.29E-07 | 9.03E-07 | 5.7130942   |
| SLC45A1  | -0.394931992 | 1.79796778 | -5.244006613 | 3.29E-07 | 9.03E-07 | 5.712596706 |
| ZNF606   | -0.324160935 | 3.04085087 | -5.241067694 | 3.34E-07 | 9.16E-07 | 5.698691127 |
| RPL36AL  | -0.350445656 | 9.4684375  | -5.237730758 | 3.39E-07 | 9.31E-07 | 5.682909925 |
| PPP6R3   | -0.338427582 | 5.29055444 | -5.237293325 | 3.40E-07 | 9.33E-07 | 5.680841797 |
| USP8     | -0.359381242 | 3.19647297 | -5.236377198 | 3.42E-07 | 9.37E-07 | 5.676510912 |
| BRAP     | -0.243551407 | 4.21059932 | -5.235558267 | 3.43E-07 | 9.40E-07 | 5.672640028 |
| TELO2    | -0.335738497 | 4.70199496 | -5.235075082 | 3.44E-07 | 9.42E-07 | 5.67035636  |
| TMEM69   | -0.276457993 | 5.20281512 | -5.234638663 | 3.44E-07 | 9.44E-07 | 5.668293868 |
| PPP1R3   | -0.427248267 | 5.43190767 | -5.234220179 | 3.45E-07 | 9.46E-07 | 5.666316268 |
| RNASEL   | -0.374063323 | 3.64240462 | -5.233249721 | 3.47E-07 | 9.50E-07 | 5.66173073  |
| C2       | 0.670772761  | 1.95137819 | 5.232739796  | 3.48E-07 | 9.53E-07 | 5.659321544 |
| SPNS2    | -0.437689229 | 2.83798803 | -5.232014285 | 3.49E-07 | 9.56E-07 | 5.655894125 |
| PTPRO    | 0.319361458  | 0.74750902 | 5.231769091  | 3.49E-07 | 9.57E-07 | 5.654735882 |
| SARS2    | -0.305637331 | 2.93033306 | -5.231111534 | 3.50E-07 | 9.60E-07 | 5.65162994  |
| METTL9   | -0.354955734 | 5.85798321 | -5.230145436 | 3.52E-07 | 9.64E-07 | 5.647067186 |
| RIOX1    | -0.279315965 | 4.08022784 | -5.230038504 | 3.52E-07 | 9.64E-07 | 5.646562205 |
| RYR1     | 0.719470817  | 2.50598676 | 5.228694717  | 3.55E-07 | 9.71E-07 | 5.640216908 |
| FAM214   | -0.443610614 | 4.05928638 | -5.227685871 | 3.56E-07 | 9.75E-07 | 5.635454055 |
| TM9SF3   | -0.366847091 | 6.69462471 | -5.22742706  | 3.57E-07 | 9.76E-07 | 5.634232302 |

|         |              |            |              |          |          |             |
|---------|--------------|------------|--------------|----------|----------|-------------|
| SLC7A4  | 0.404226576  | 0.81826198 | 5.225873474  | 3.60E-07 | 9.84E-07 | 5.626899422 |
| RASSF1  | -0.427637983 | 0.50018044 | -5.225819269 | 3.60E-07 | 9.84E-07 | 5.62664361  |
| TMEM19  | -0.373322921 | 0.66060848 | -5.225137143 | 3.61E-07 | 9.87E-07 | 5.623424574 |
| ELOVL2  | -0.457787737 | 1.25966544 | -5.224867333 | 3.61E-07 | 9.88E-07 | 5.622151405 |
| SCN1B   | 0.62671643   | 3.70524741 | 5.224656328  | 3.62E-07 | 9.89E-07 | 5.621155755 |
| EEF1D   | -0.355468063 | 5.51227557 | -5.224475342 | 3.62E-07 | 9.90E-07 | 5.620301781 |
| PDXDC1  | -0.370601519 | 5.41529878 | -5.224369925 | 3.62E-07 | 9.90E-07 | 5.61980439  |
| SPRYD7  | -0.279398387 | 3.96554299 | -5.223402285 | 3.64E-07 | 9.94E-07 | 5.615239102 |
| RPL10A  | -0.424460151 | 10.284954  | -5.223201218 | 3.64E-07 | 9.95E-07 | 5.614290563 |
| CXCL1   | 0.585213945  | 1.02066912 | 5.221433874  | 3.67E-07 | 1.00E-06 | 5.605954328 |
| USH1C   | -0.394776167 | 0.39944862 | -5.221087871 | 3.68E-07 | 1.01E-06 | 5.604322564 |
| POLDIP3 | -0.440307274 | 6.37360232 | -5.220944704 | 3.68E-07 | 1.01E-06 | 5.603647407 |
| RPS23   | -0.329110803 | 8.62842377 | -5.220038464 | 3.70E-07 | 1.01E-06 | 5.599374048 |
| LAPTM4  | -0.437715623 | 9.12344802 | -5.220002732 | 3.70E-07 | 1.01E-06 | 5.599205566 |
| MEAK7   | -0.246922065 | 2.66317717 | -5.219064046 | 3.72E-07 | 1.01E-06 | 5.594779864 |
| CRIP3   | -0.295036342 | 0.68402699 | -5.217479033 | 3.75E-07 | 1.02E-06 | 5.587308324 |
| GATA5   | -0.995832453 | 1.26118941 | -5.216388995 | 3.77E-07 | 1.03E-06 | 5.582171091 |
| PLPPR1  | 0.221183419  | 0.21753742 | 5.215793589  | 3.78E-07 | 1.03E-06 | 5.579365374 |
| HAVCR2  | 0.649543241  | 2.48015597 | 5.214928842  | 3.79E-07 | 1.03E-06 | 5.575290908 |
| LEAP2   | -0.304475404 | 1.08491943 | -5.21422359  | 3.81E-07 | 1.04E-06 | 5.571968347 |
| SLC12A5 | -0.306784065 | 3.74121948 | -5.213579238 | 3.82E-07 | 1.04E-06 | 5.568933008 |
| FHL5    | -0.632858162 | 1.98620707 | -5.213043993 | 3.83E-07 | 1.04E-06 | 5.566411873 |
| ZNF44   | -0.317669667 | 3.13028207 | -5.212496005 | 3.84E-07 | 1.05E-06 | 5.563830929 |
| TRAPPC  | -0.377429808 | 4.27999303 | -5.212146265 | 3.84E-07 | 1.05E-06 | 5.562183817 |
| MAP3K1  | -0.27259246  | 3.62010121 | -5.211818089 | 3.85E-07 | 1.05E-06 | 5.560638344 |
| FPR3    | 0.768744828  | 2.81011752 | 5.211622718  | 3.85E-07 | 1.05E-06 | 5.559718328 |
| SDC3    | 0.542437124  | 5.54992961 | 5.21158196   | 3.86E-07 | 1.05E-06 | 5.559526398 |
| AMD1    | -0.374655473 | 4.89631294 | -5.211579313 | 3.86E-07 | 1.05E-06 | 5.55951393  |
| CXCL3   | 0.416901977  | 0.80284163 | 5.211066345  | 3.87E-07 | 1.05E-06 | 5.557098467 |
| CASTOR  | 0.474060828  | 1.83428022 | 5.210776518  | 3.87E-07 | 1.05E-06 | 5.555733818 |
| TVP23C  | -0.246077895 | 1.63233001 | -5.208899969 | 3.91E-07 | 1.06E-06 | 5.54689956  |
| AKNA    | 0.514214747  | 3.68138071 | 5.208595243  | 3.91E-07 | 1.06E-06 | 5.545465239 |
| FSCN2   | -0.437992141 | 3.51736563 | -5.207763437 | 3.93E-07 | 1.07E-06 | 5.541550336 |
| SEMA6D  | -0.698927892 | 2.19598139 | -5.207652266 | 3.93E-07 | 1.07E-06 | 5.541027149 |
| NRBF2   | -0.3183542   | 4.71660825 | -5.207378608 | 3.94E-07 | 1.07E-06 | 5.53973931  |
| PEX6    | -0.38988407  | 5.54507846 | -5.207131825 | 3.94E-07 | 1.07E-06 | 5.538577989 |
| PTMA    | -0.363453163 | 9.57994392 | -5.206846558 | 3.95E-07 | 1.07E-06 | 5.537235631 |
| CEP126  | -0.403944367 | 2.022572   | -5.206482708 | 3.95E-07 | 1.07E-06 | 5.535523571 |
| EVI2B   | 0.819304219  | 3.27692805 | 5.206249557  | 3.96E-07 | 1.08E-06 | 5.534426549 |
| KLHL12  | -0.329691758 | 5.25835914 | -5.206071293 | 3.96E-07 | 1.08E-06 | 5.533587813 |



|          |              |            |              |          |          |             |
|----------|--------------|------------|--------------|----------|----------|-------------|
| TRIM52   | -0.340426765 | 2.8467864  | -5.20597768  | 3.96E-07 | 1.08E-06 | 5.533147373 |
| ENDOU    | -0.344221656 | 0.86476748 | -5.205850755 | 3.96E-07 | 1.08E-06 | 5.53255021  |
| LRP3     | -0.393489769 | 4.30071417 | -5.204566702 | 3.99E-07 | 1.08E-06 | 5.526509591 |
| CFAP77   | -0.187083205 | 0.22035849 | -5.204386681 | 3.99E-07 | 1.08E-06 | 5.525662806 |
| ZNF383   | -0.285016551 | 2.29386386 | -5.204010221 | 4.00E-07 | 1.09E-06 | 5.523892093 |
| IL23A    | 0.424634784  | 2.0205268  | 5.203427221  | 4.01E-07 | 1.09E-06 | 5.521150097 |
| KCTD3    | -0.395466702 | 5.02335536 | -5.203131981 | 4.02E-07 | 1.09E-06 | 5.519761606 |
| DCHS2    | 0.297154516  | 0.53576287 | 5.20279137   | 4.02E-07 | 1.09E-06 | 5.518159816 |
| MTX3     | -0.357648126 | 3.49360323 | -5.202579976 | 4.03E-07 | 1.09E-06 | 5.517165736 |
| SLC38A6  | -0.222166556 | 2.44620978 | -5.201766039 | 4.04E-07 | 1.10E-06 | 5.513338507 |
| CHRFAM   | -0.243012846 | 0.47007196 | -5.201757245 | 4.04E-07 | 1.10E-06 | 5.51329716  |
| RRAS2    | -0.361946264 | 4.43594567 | -5.201229884 | 4.05E-07 | 1.10E-06 | 5.510817708 |
| C1orf127 | -0.187424156 | 0.45145039 | -5.20111599  | 4.06E-07 | 1.10E-06 | 5.51028225  |
| ZNF720   | -0.312159485 | 2.71604454 | -5.201044579 | 4.06E-07 | 1.10E-06 | 5.509946523 |
| ZNF112   | -0.361201235 | 2.57727506 | -5.200923323 | 4.06E-07 | 1.10E-06 | 5.509376467 |
| OR4D6    | 0.242742521  | 0.2758962  | 5.200123853  | 4.08E-07 | 1.11E-06 | 5.505618226 |
| SYDE2    | -0.402001048 | 1.67438572 | -5.199894614 | 4.08E-07 | 1.11E-06 | 5.504540678 |
| ZBTB46   | -0.302225858 | 3.81402833 | -5.198568035 | 4.11E-07 | 1.11E-06 | 5.498305797 |
| RAB7A    | -0.25555762  | 8.57216833 | -5.197782291 | 4.12E-07 | 1.12E-06 | 5.49461343  |
| TAX1BP1  | -0.355470431 | 5.94703885 | -5.197142714 | 4.14E-07 | 1.12E-06 | 5.491608265 |
| UNC13B   | -0.396869333 | 4.60752119 | -5.195616799 | 4.17E-07 | 1.13E-06 | 5.484439689 |
| CUL2     | -0.310117436 | 4.17459772 | -5.194923518 | 4.18E-07 | 1.13E-06 | 5.481183298 |
| CFAP74   | -0.1253131   | 0.2111769  | -5.193562829 | 4.21E-07 | 1.14E-06 | 5.474793059 |
| ATMIN    | -0.328437698 | 5.08276347 | -5.192640969 | 4.23E-07 | 1.14E-06 | 5.470464477 |
| C1orf174 | -0.288405556 | 3.8440319  | -5.190616674 | 4.27E-07 | 1.16E-06 | 5.460961601 |
| RAPGEF   | -0.229944853 | 1.88678102 | -5.188435583 | 4.31E-07 | 1.17E-06 | 5.45072601  |
| SMKR1    | -0.398544679 | 1.83407771 | -5.187997357 | 4.32E-07 | 1.17E-06 | 5.448669892 |
| SPDL1    | -0.278408483 | 2.07799497 | -5.187257284 | 4.34E-07 | 1.17E-06 | 5.44519785  |
| CCDC7    | -0.178204022 | 0.75330706 | -5.18654196  | 4.35E-07 | 1.18E-06 | 5.441842297 |
| ZNF639   | -0.318255469 | 3.88418206 | -5.186144447 | 4.36E-07 | 1.18E-06 | 5.439977745 |
| ZNF497   | -0.340860377 | 1.76138332 | -5.186042931 | 4.37E-07 | 1.18E-06 | 5.439501597 |
| RNASEK   | -0.18532139  | 0.83816953 | -5.185412695 | 4.38E-07 | 1.18E-06 | 5.436545733 |
| AMN1     | -0.327620406 | 2.39468895 | -5.184980209 | 4.39E-07 | 1.19E-06 | 5.434517497 |
| PADI1    | 0.141569118  | 0.11659193 | 5.181897173  | 4.45E-07 | 1.20E-06 | 5.42006293  |
| CCDC15   | -0.670544474 | 2.2791783  | -5.181118697 | 4.47E-07 | 1.21E-06 | 5.416414206 |
| SLC6A13  | -0.600547094 | 2.3560934  | -5.180817506 | 4.48E-07 | 1.21E-06 | 5.415002643 |
| SMAD4    | -0.332059754 | 4.27757446 | -5.179765567 | 4.50E-07 | 1.22E-06 | 5.410073132 |
| ZBED5    | -0.326084956 | 4.05898537 | -5.179559487 | 4.50E-07 | 1.22E-06 | 5.409107514 |
| RAB3C    | 0.162387082  | 0.23772233 | 5.178898517  | 4.52E-07 | 1.22E-06 | 5.406010647 |
| CTSO     | -0.479338815 | 5.89946033 | -5.178436121 | 4.53E-07 | 1.22E-06 | 5.403844355 |

|          |              |            |              |          |          |             |
|----------|--------------|------------|--------------|----------|----------|-------------|
| EDDM13   | -0.138968801 | 0.41453001 | -5.177648891 | 4.55E-07 | 1.23E-06 | 5.400156601 |
| ATP4A    | -0.413627287 | 0.55848217 | -5.177037629 | 4.56E-07 | 1.23E-06 | 5.397293476 |
| ANP32B   | -0.332627898 | 7.92465586 | -5.176360498 | 4.58E-07 | 1.24E-06 | 5.39412214  |
| ZNF616   | -0.297244882 | 2.79081624 | -5.176215685 | 4.58E-07 | 1.24E-06 | 5.393443957 |
| NPNT     | -0.585967886 | 8.14838464 | -5.17565102  | 4.59E-07 | 1.24E-06 | 5.390799672 |
| CPSF2    | -0.312646735 | 3.75361055 | -5.17507834  | 4.60E-07 | 1.24E-06 | 5.388118095 |
| ADGRG3   | -0.362245307 | 0.57866929 | -5.174692326 | 4.61E-07 | 1.24E-06 | 5.386310716 |
| PPP4R3   | -0.319637195 | 5.12966565 | -5.172386261 | 4.66E-07 | 1.26E-06 | 5.375515635 |
| TMEM19   | -0.347319245 | 3.83262094 | -5.170448499 | 4.71E-07 | 1.27E-06 | 5.366447658 |
| IGSF3    | 0.647716788  | 4.4347634  | 5.170235538  | 4.71E-07 | 1.27E-06 | 5.365451249 |
| IER5L    | 0.695652622  | 4.19798636 | 5.168551129  | 4.75E-07 | 1.28E-06 | 5.357571364 |
| BRPF1    | -0.327012848 | 4.13325796 | -5.16816804  | 4.76E-07 | 1.28E-06 | 5.355779516 |
| PTPRJ    | -0.40253741  | 4.59587654 | -5.168065767 | 4.76E-07 | 1.28E-06 | 5.355301166 |
| BCL2A1   | 0.761607553  | 2.51702918 | 5.167382492  | 4.78E-07 | 1.29E-06 | 5.352105552 |
| SLC30A5  | -0.392130446 | 5.09407865 | -5.167072946 | 4.79E-07 | 1.29E-06 | 5.350657949 |
| VSIG1    | 0.334315383  | 0.67352716 | 5.166608779  | 4.80E-07 | 1.29E-06 | 5.34848738  |
| SDR42E1  | -0.111609597 | 0.26869729 | -5.166376091 | 4.80E-07 | 1.29E-06 | 5.347399333 |
| ZBTB40   | -0.364631184 | 3.60588131 | -5.165463863 | 4.82E-07 | 1.30E-06 | 5.343134134 |
| DKC1     | -0.325652692 | 5.40545371 | -5.16490934  | 4.84E-07 | 1.30E-06 | 5.340541714 |
| CFAP54   | -0.174418149 | 0.39876872 | -5.164737502 | 4.84E-07 | 1.30E-06 | 5.33973841  |
| SPINDO1  | -0.307682418 | 4.21022152 | -5.164603593 | 4.84E-07 | 1.30E-06 | 5.339112428 |
| COL8A1   | 0.728601353  | 6.21123109 | 5.164568573  | 4.84E-07 | 1.30E-06 | 5.338948725 |
| C19orf81 | -0.677611732 | 0.95834002 | -5.163916209 | 4.86E-07 | 1.31E-06 | 5.335899349 |
| TBRG4    | -0.22717152  | 4.40451671 | -5.163863387 | 4.86E-07 | 1.31E-06 | 5.335652454 |
| UGGT1    | -0.395201168 | 4.39512082 | -5.16343719  | 4.87E-07 | 1.31E-06 | 5.33366044  |
| PITPNB   | -0.311562012 | 4.75703123 | -5.163386904 | 4.87E-07 | 1.31E-06 | 5.33342542  |
| ABCB1    | -0.477278599 | 1.86021485 | -5.163263754 | 4.88E-07 | 1.31E-06 | 5.332849856 |
| RAB19    | -0.549409163 | 2.05809385 | -5.162914836 | 4.88E-07 | 1.31E-06 | 5.331219185 |
| MYL5     | -0.362544867 | 2.69267299 | -5.161768416 | 4.91E-07 | 1.32E-06 | 5.325862013 |
| BCL2L10  | -0.561988132 | 1.69480581 | -5.161615657 | 4.91E-07 | 1.32E-06 | 5.325148248 |
| WAC      | -0.348925154 | 5.12020276 | -5.16134005  | 4.92E-07 | 1.32E-06 | 5.323860523 |
| DNAAF5   | -0.284627863 | 3.62480982 | -5.160896681 | 4.93E-07 | 1.33E-06 | 5.321789076 |
| PHF1     | -0.300175957 | 6.70807484 | -5.16074699  | 4.93E-07 | 1.33E-06 | 5.321089744 |
| H2AFY2   | -0.364591379 | 5.48520767 | -5.160352661 | 4.94E-07 | 1.33E-06 | 5.31924758  |
| CTXN1    | 0.967541898  | 4.76087724 | 5.159406124  | 4.97E-07 | 1.33E-06 | 5.314826164 |
| CDK6     | -0.445491859 | 2.16503628 | -5.158411128 | 4.99E-07 | 1.34E-06 | 5.310179096 |
| CS       | -0.343010996 | 5.70235254 | -5.157377787 | 5.02E-07 | 1.35E-06 | 5.305353712 |
| ARNTL    | 0.85951909   | 4.31769515 | 5.156260759  | 5.04E-07 | 1.35E-06 | 5.300138418 |
| PACRGL   | -0.343191261 | 3.23657958 | -5.156122297 | 5.05E-07 | 1.35E-06 | 5.299492017 |
| TDRD6    | -0.45680105  | 1.12144641 | -5.154099164 | 5.10E-07 | 1.37E-06 | 5.290048742 |

|         |              |            |              |          |          |             |
|---------|--------------|------------|--------------|----------|----------|-------------|
| SLC1A1  | -0.853659149 | 4.3287749  | -5.153847479 | 5.10E-07 | 1.37E-06 | 5.288874174 |
| ACBD4   | -0.351617846 | 4.55747609 | -5.152966552 | 5.12E-07 | 1.37E-06 | 5.28476342  |
| TPGS1   | -0.539096029 | 1.90529877 | -5.152916473 | 5.13E-07 | 1.38E-06 | 5.284529747 |
| LAPTM5  | 0.724045023  | 6.20898146 | 5.152167231  | 5.14E-07 | 1.38E-06 | 5.281033963 |
| ZMYND1  | -0.258465421 | 4.1169378  | -5.152108116 | 5.15E-07 | 1.38E-06 | 5.280758166 |
| UBE2R2  | -0.271692483 | 5.98479158 | -5.151721525 | 5.15E-07 | 1.38E-06 | 5.278954599 |
| PWWP3   | -0.357980404 | 3.52325043 | -5.15140334  | 5.16E-07 | 1.38E-06 | 5.277470257 |
| SNAP25  | 0.667581019  | 1.67582806 | 5.151348249  | 5.16E-07 | 1.38E-06 | 5.277213259 |
| KLF9    | -0.523992526 | 5.22471235 | -5.150779322 | 5.18E-07 | 1.39E-06 | 5.274559401 |
| NAPEPL1 | -0.404180724 | 3.70232812 | -5.150701449 | 5.18E-07 | 1.39E-06 | 5.274196166 |
| INSC    | -0.334412196 | 0.46149522 | -5.149961163 | 5.20E-07 | 1.39E-06 | 5.270743373 |
| MCPH1   | -0.278074592 | 2.78501084 | -5.149942969 | 5.20E-07 | 1.39E-06 | 5.270658518 |
| KCTD5   | -0.33566523  | 4.48327514 | -5.149294714 | 5.22E-07 | 1.40E-06 | 5.267635305 |
| SERPINE | 0.325598301  | 0.34185035 | 5.149180322  | 5.22E-07 | 1.40E-06 | 5.26710186  |
| RNASEH  | -0.391768343 | 4.4858884  | -5.149166843 | 5.22E-07 | 1.40E-06 | 5.267039003 |
| LENG9   | 0.504742461  | 2.45749386 | 5.148771338  | 5.23E-07 | 1.40E-06 | 5.26519471  |
| HFE     | -0.399296607 | 3.32961515 | -5.147135059 | 5.27E-07 | 1.41E-06 | 5.257565742 |
| MAPK11  | -0.395948757 | 3.67693251 | -5.145887847 | 5.30E-07 | 1.42E-06 | 5.251752076 |
| GBE1    | -0.374278604 | 4.01034081 | -5.145878512 | 5.30E-07 | 1.42E-06 | 5.251708564 |
| TENT5B  | -0.594997545 | 2.75890263 | -5.145610577 | 5.31E-07 | 1.42E-06 | 5.25045978  |
| NT5E    | 0.911756946  | 5.57105735 | 5.143900533  | 5.35E-07 | 1.43E-06 | 5.24249091  |
| TVP23B  | -0.407742026 | 4.07400809 | -5.142864589 | 5.38E-07 | 1.44E-06 | 5.23766442  |
| GPC4    | -0.497415063 | 4.46157502 | -5.14285208  | 5.38E-07 | 1.44E-06 | 5.237606144 |
| ESS2    | -0.270812963 | 3.57475141 | -5.142740701 | 5.38E-07 | 1.44E-06 | 5.237087274 |
| SCAP    | -0.315420421 | 5.62815593 | -5.142052656 | 5.40E-07 | 1.44E-06 | 5.233882154 |
| COQ2    | -0.289415905 | 3.73565924 | -5.141946782 | 5.40E-07 | 1.44E-06 | 5.23338899  |
| DNAJA4  | -0.453857757 | 3.37610734 | -5.140801692 | 5.43E-07 | 1.45E-06 | 5.228055674 |
| IGHMBP1 | -0.27130109  | 2.99605321 | -5.140478971 | 5.44E-07 | 1.45E-06 | 5.226552762 |
| DGAT2L1 | 0.140895711  | 0.21691624 | 5.139700049  | 5.46E-07 | 1.46E-06 | 5.222925628 |
| TAF15   | -0.293108209 | 6.17588721 | -5.139654769 | 5.46E-07 | 1.46E-06 | 5.222714788 |
| ATP13A1 | -0.289771097 | 5.06707407 | -5.13943646  | 5.47E-07 | 1.46E-06 | 5.2216983   |
| ATP6V1E | -0.302318756 | 6.76741931 | -5.139420205 | 5.47E-07 | 1.46E-06 | 5.221622615 |
| TESMIN  | -0.283410703 | 1.13567023 | -5.138394103 | 5.50E-07 | 1.47E-06 | 5.216845352 |
| LDB3    | -0.35202376  | 1.07357442 | -5.138006541 | 5.51E-07 | 1.47E-06 | 5.215041171 |
| ZNF547  | -0.297201516 | 1.66727913 | -5.136657529 | 5.54E-07 | 1.48E-06 | 5.208762092 |
| SIGLEC9 | 0.410270536  | 1.35487708 | 5.135912861  | 5.56E-07 | 1.48E-06 | 5.205296549 |
| RPS6KC  | -0.309398584 | 3.13217321 | -5.134993033 | 5.59E-07 | 1.49E-06 | 5.201016414 |
| TCEA2   | -0.340577616 | 5.10320497 | -5.132919801 | 5.64E-07 | 1.51E-06 | 5.191371547 |
| MAP7    | -0.389790703 | 4.68947591 | -5.132356916 | 5.66E-07 | 1.51E-06 | 5.1887535   |
| CD164L2 | 0.787731985  | 2.22654541 | 5.130431224  | 5.71E-07 | 1.52E-06 | 5.179798641 |

|         |              |            |              |          |          |             |
|---------|--------------|------------|--------------|----------|----------|-------------|
| CNBP    | -0.274573557 | 9.08567915 | -5.130304244 | 5.72E-07 | 1.52E-06 | 5.179208252 |
| ANKRD4  | -0.335344354 | 3.79594587 | -5.129994936 | 5.72E-07 | 1.53E-06 | 5.177770192 |
| EPHA5   | -0.327137002 | 0.26342234 | -5.129910979 | 5.73E-07 | 1.53E-06 | 5.177379865 |
| LIF     | 0.702402776  | 3.14195771 | 5.127938995  | 5.78E-07 | 1.54E-06 | 5.168213322 |
| COPG1   | -0.283665176 | 7.2845813  | -5.127788109 | 5.79E-07 | 1.54E-06 | 5.167512063 |
| LYSMD3  | -0.453578654 | 4.13224904 | -5.127570973 | 5.79E-07 | 1.54E-06 | 5.166502932 |
| MPV17   | -0.290895519 | 5.42642585 | -5.127062106 | 5.81E-07 | 1.55E-06 | 5.164138126 |
| CHIC2   | -0.362364181 | 4.61910099 | -5.126691267 | 5.82E-07 | 1.55E-06 | 5.162414879 |
| PEX13   | -0.368163164 | 4.33692077 | -5.125890571 | 5.84E-07 | 1.56E-06 | 5.158694492 |
| ZNF626  | -0.378525354 | 3.2710439  | -5.124001786 | 5.89E-07 | 1.57E-06 | 5.149920229 |
| FRMD4B  | -0.645016744 | 4.2019587  | -5.122877161 | 5.92E-07 | 1.58E-06 | 5.144697085 |
| TUBA4B  | -0.340132715 | 0.44090808 | -5.122732799 | 5.93E-07 | 1.58E-06 | 5.144026687 |
| EIF4G2  | -0.427043959 | 8.08761799 | -5.121234256 | 5.97E-07 | 1.59E-06 | 5.137068546 |
| ARL4C   | 0.717261132  | 2.96943522 | 5.120637865  | 5.99E-07 | 1.59E-06 | 5.134299805 |
| RCBTB1  | -0.502524994 | 5.68093709 | -5.119751412 | 6.01E-07 | 1.60E-06 | 5.130184933 |
| CLCN2   | -0.269274327 | 2.48742027 | -5.119437718 | 6.02E-07 | 1.60E-06 | 5.128728922 |
| FCER1A  | 0.957742525  | 2.58476978 | 5.119134925  | 6.03E-07 | 1.60E-06 | 5.127323576 |
| SBSPON  | -0.423968262 | 1.09421968 | -5.118507576 | 6.05E-07 | 1.61E-06 | 5.124412088 |
| B3GALN  | -0.553805287 | 2.22237714 | -5.117357236 | 6.08E-07 | 1.62E-06 | 5.119074186 |
| MPHOSF  | -0.325526991 | 1.68127381 | -5.117086251 | 6.09E-07 | 1.62E-06 | 5.117816883 |
| CMTM4   | -0.565513675 | 6.0859004  | -5.116476327 | 6.11E-07 | 1.62E-06 | 5.114987181 |
| NADK    | -0.354400688 | 4.70211725 | -5.115359942 | 6.14E-07 | 1.63E-06 | 5.1098085   |
| SNED1   | -0.549901948 | 3.19317245 | -5.115251137 | 6.15E-07 | 1.63E-06 | 5.109303825 |
| FADD    | -0.372687578 | 4.10040741 | -5.114388308 | 6.17E-07 | 1.64E-06 | 5.105302035 |
| BHMT2   | -0.962168224 | 3.36394754 | -5.113051402 | 6.21E-07 | 1.65E-06 | 5.099102573 |
| VRK1    | -0.265547475 | 3.37441094 | -5.112103831 | 6.24E-07 | 1.66E-06 | 5.094709321 |
| ASB1    | -0.374608708 | 3.57418988 | -5.111320341 | 6.26E-07 | 1.66E-06 | 5.091077307 |
| NAMPT   | 0.555939432  | 4.20218704 | 5.111089116  | 6.27E-07 | 1.66E-06 | 5.090005502 |
| IL7R    | 0.826500828  | 1.95177745 | 5.110900388  | 6.28E-07 | 1.67E-06 | 5.089130719 |
| CLEC4D  | 0.154382636  | 0.20802638 | 5.110030089  | 6.30E-07 | 1.67E-06 | 5.085097085 |
| TUB     | -0.558884939 | 3.1193689  | -5.110018204 | 6.30E-07 | 1.67E-06 | 5.085042006 |
| A2M     | -0.482037798 | 7.69087814 | -5.10991703  | 6.30E-07 | 1.67E-06 | 5.084573121 |
| PIM2    | 0.75938607   | 4.09909823 | 5.109233585  | 6.33E-07 | 1.68E-06 | 5.081405961 |
| KCNAB2  | 0.414639743  | 2.50515843 | 5.109232793  | 6.33E-07 | 1.68E-06 | 5.081402291 |
| PLEKHG  | 0.653394231  | 2.91079043 | 5.109075781  | 6.33E-07 | 1.68E-06 | 5.08067473  |
| CCDC19  | -0.193284414 | 0.60782025 | -5.108984342 | 6.33E-07 | 1.68E-06 | 5.080251029 |
| TMC4    | -0.406424979 | 7.0462363  | -5.108800244 | 6.34E-07 | 1.68E-06 | 5.079397987 |
| NCBP1   | -0.344280153 | 4.2109448  | -5.10817086  | 6.36E-07 | 1.69E-06 | 5.07648186  |
| CD101   | 0.331606907  | 0.96573269 | 5.108039542  | 6.36E-07 | 1.69E-06 | 5.07587346  |
| KLHDC7I | 0.852228817  | 2.34025452 | 5.107341967  | 6.38E-07 | 1.69E-06 | 5.07264179  |

|          |              |            |              |          |          |             |
|----------|--------------|------------|--------------|----------|----------|-------------|
| MSX1     | -0.413548191 | 2.1063535  | -5.107209292 | 6.39E-07 | 1.69E-06 | 5.072027184 |
| ADRA1D   | -0.197445548 | 0.36790781 | -5.107080338 | 6.39E-07 | 1.69E-06 | 5.071429826 |
| SLMAP    | -0.433057136 | 3.4066797  | -5.10700474  | 6.39E-07 | 1.69E-06 | 5.071079639 |
| KIAA158  | -0.303805202 | 2.78716297 | -5.106829109 | 6.40E-07 | 1.70E-06 | 5.070266088 |
| NGLY1    | -0.289178085 | 3.46409609 | -5.105924984 | 6.43E-07 | 1.70E-06 | 5.066078409 |
| ZNF285   | -0.259659655 | 1.60193613 | -5.105711199 | 6.43E-07 | 1.70E-06 | 5.065088297 |
| HCFC2    | -0.381551528 | 3.02558509 | -5.105552997 | 6.44E-07 | 1.70E-06 | 5.064355634 |
| THBS4    | -1.120273584 | 3.02098719 | -5.105430643 | 6.44E-07 | 1.71E-06 | 5.063789    |
| EPX      | -0.115773801 | 0.25001526 | -5.104511242 | 6.47E-07 | 1.71E-06 | 5.059531516 |
| TMPRSS   | -0.661827204 | 1.41399688 | -5.10389347  | 6.49E-07 | 1.72E-06 | 5.056671144 |
| LY6E     | 0.869191989  | 7.06307016 | 5.103181245  | 6.51E-07 | 1.72E-06 | 5.053373791 |
| DDX10    | -0.311446843 | 3.03315372 | -5.103061702 | 6.52E-07 | 1.72E-06 | 5.052820385 |
| GPR89B   | -0.170719845 | 1.27720354 | -5.10239488  | 6.54E-07 | 1.73E-06 | 5.049733627 |
| BCL3     | 0.469686394  | 4.73368532 | 5.102242832  | 6.54E-07 | 1.73E-06 | 5.049029837 |
| ATRNL1   | -0.468401687 | 0.53390574 | -5.101126704 | 6.58E-07 | 1.74E-06 | 5.043864079 |
| TBC1D3   | -0.249053784 | 1.23385522 | -5.100641049 | 6.59E-07 | 1.74E-06 | 5.04161662  |
| NR2F1    | 0.693616352  | 3.45553133 | 5.100050831  | 6.61E-07 | 1.75E-06 | 5.038885508 |
| DLK2     | -0.22682903  | 0.76155335 | -5.099935409 | 6.61E-07 | 1.75E-06 | 5.038351446 |
| GRM4     | 0.586533186  | 0.83345119 | 5.099766294  | 6.62E-07 | 1.75E-06 | 5.037568964 |
| SH2D4B   | -0.143010706 | 0.16632667 | -5.099519925 | 6.63E-07 | 1.75E-06 | 5.036429069 |
| RSRC1    | -0.306864513 | 3.66083931 | -5.0990773   | 6.64E-07 | 1.75E-06 | 5.034381257 |
| C22orf23 | -0.429730546 | 2.26529783 | -5.098464704 | 6.66E-07 | 1.76E-06 | 5.031547309 |
| TEK      | -0.547299269 | 3.59741452 | -5.097845912 | 6.68E-07 | 1.76E-06 | 5.028684976 |
| IGSF9    | 0.596003724  | 2.27842607 | 5.097556836  | 6.69E-07 | 1.77E-06 | 5.027347904 |
| DNASE1   | -0.312565189 | 2.06595821 | -5.097534006 | 6.69E-07 | 1.77E-06 | 5.027242311 |
| ZNF282   | -0.289321979 | 4.64269251 | -5.097362643 | 6.70E-07 | 1.77E-06 | 5.026449728 |
| FN3KRP   | -0.309055826 | 5.351336   | -5.096213845 | 6.73E-07 | 1.78E-06 | 5.021136925 |
| CENPQ    | -0.287996823 | 3.02128984 | -5.094494464 | 6.79E-07 | 1.79E-06 | 5.013187193 |
| SYNE4    | -0.358863044 | 4.44595296 | -5.094339579 | 6.79E-07 | 1.79E-06 | 5.012471172 |
| RFFL     | -0.521452377 | 4.00869199 | -5.09342655  | 6.82E-07 | 1.80E-06 | 5.008250684 |
| SAMSN1   | 0.635703099  | 1.67636448 | 5.093290434  | 6.83E-07 | 1.80E-06 | 5.007621537 |
| UFM1     | -0.329237371 | 5.77221867 | -5.093068765 | 6.84E-07 | 1.80E-06 | 5.006596983 |
| WDR73    | -0.276174111 | 1.58957999 | -5.091885032 | 6.87E-07 | 1.81E-06 | 5.001126395 |
| WDR37    | -0.351292921 | 3.84018076 | -5.090208798 | 6.93E-07 | 1.83E-06 | 4.993381496 |
| C10orf55 | 0.604208478  | 1.46589814 | 5.090189613  | 6.93E-07 | 1.83E-06 | 4.993292866 |
| LIPF     | -0.149715113 | 0.09705551 | -5.088621171 | 6.98E-07 | 1.84E-06 | 4.986047918 |
| SPTBN5   | -0.359714699 | 1.32885301 | -5.088186404 | 7.00E-07 | 1.84E-06 | 4.984039963 |
| FMO1     | -0.327292078 | 0.6122127  | -5.086690722 | 7.05E-07 | 1.86E-06 | 4.977133286 |
| ADCYAP   | -0.621983429 | 1.04335847 | -5.086286844 | 7.06E-07 | 1.86E-06 | 4.975268564 |
| TTC32    | -0.393421969 | 3.73435221 | -5.085636398 | 7.08E-07 | 1.87E-06 | 4.97226568  |

|         |              |            |              |          |          |             |
|---------|--------------|------------|--------------|----------|----------|-------------|
| HNRNPA  | -0.344275507 | 6.09708226 | -5.085180925 | 7.10E-07 | 1.87E-06 | 4.970163107 |
| TMEM39  | -0.373958679 | 4.32210848 | -5.085029693 | 7.10E-07 | 1.87E-06 | 4.969465018 |
| TNIP2   | -0.249688563 | 5.44214682 | -5.084717994 | 7.11E-07 | 1.87E-06 | 4.968026263 |
| VASN    | 0.652692492  | 6.63313424 | 5.083242133  | 7.16E-07 | 1.89E-06 | 4.961214897 |
| GLB1L   | -0.395035398 | 4.15052057 | -5.082224629 | 7.20E-07 | 1.90E-06 | 4.956519867 |
| SELENO  | -0.385893335 | 3.48688543 | -5.081091053 | 7.24E-07 | 1.91E-06 | 4.951290155 |
| EPN3    | -0.539031393 | 2.23823778 | -5.080840271 | 7.25E-07 | 1.91E-06 | 4.950133312 |
| PPP5C   | -0.30809039  | 4.98259427 | -5.079338858 | 7.30E-07 | 1.92E-06 | 4.943208341 |
| PPP1R1  | -0.389133036 | 2.40521411 | -5.078498617 | 7.33E-07 | 1.93E-06 | 4.939333625 |
| LHFPL1  | -0.442945632 | 1.06707652 | -5.07845634  | 7.33E-07 | 1.93E-06 | 4.93913868  |
| NXN     | 0.686503408  | 4.48137278 | 5.078424299  | 7.33E-07 | 1.93E-06 | 4.938990939 |
| PHKG2   | -0.297508948 | 4.10786401 | -5.078074002 | 7.34E-07 | 1.93E-06 | 4.937375742 |
| GABPB1  | -0.293726059 | 3.38624629 | -5.076649726 | 7.39E-07 | 1.94E-06 | 4.930809428 |
| IREB2   | -0.419428406 | 4.00337994 | -5.074974034 | 7.45E-07 | 1.96E-06 | 4.923085948 |
| GLIPR1L | -0.376475535 | 1.22955151 | -5.074662845 | 7.46E-07 | 1.96E-06 | 4.921651864 |
| CNOT2   | -0.240474456 | 3.77391743 | -5.074479996 | 7.47E-07 | 1.96E-06 | 4.92080926  |
| GREM1   | 0.462811186  | 0.61250642 | 5.072661905  | 7.54E-07 | 1.98E-06 | 4.912432458 |
| SEZ6L2  | 1.108894232  | 3.85382746 | 5.072228083  | 7.55E-07 | 1.98E-06 | 4.910434    |
| ICE2    | -0.310564663 | 3.06555069 | -5.070799358 | 7.60E-07 | 2.00E-06 | 4.903853373 |
| SBDS    | -0.358347613 | 7.67111654 | -5.070574627 | 7.61E-07 | 2.00E-06 | 4.902818414 |
| ITGA8   | -0.440428641 | 1.98660267 | -5.070213666 | 7.63E-07 | 2.00E-06 | 4.901156148 |
| SRGAP2  | 0.378779721  | 2.32598389 | 5.069680511  | 7.64E-07 | 2.01E-06 | 4.898701084 |
| PDE4B   | -0.551618894 | 2.70493886 | -5.068560114 | 7.69E-07 | 2.02E-06 | 4.893542588 |
| DIXDC1  | -0.454926465 | 3.34706247 | -5.068510119 | 7.69E-07 | 2.02E-06 | 4.893312428 |
| TRIM3   | -0.22477474  | 2.17319125 | -5.068301054 | 7.69E-07 | 2.02E-06 | 4.892349966 |
| ADGRF1  | 0.740987989  | 3.179752   | 5.067805553  | 7.71E-07 | 2.02E-06 | 4.89006899  |
| NBR1    | -0.379424051 | 6.28153605 | -5.067420804 | 7.73E-07 | 2.03E-06 | 4.888297971 |
| PTAFR   | 0.636394571  | 2.81474021 | 5.066872047  | 7.75E-07 | 2.03E-06 | 4.885772207 |
| KIAA195 | -0.298426643 | 1.73172816 | -5.066780471 | 7.75E-07 | 2.03E-06 | 4.885350727 |
| HIGD2B  | -0.122935641 | 0.12636642 | -5.06657759  | 7.76E-07 | 2.03E-06 | 4.884417001 |
| GRP     | 0.696597453  | 0.97585135 | 5.066221762  | 7.77E-07 | 2.04E-06 | 4.882779424 |
| ABRACL  | -0.307809625 | 6.08592003 | -5.065698827 | 7.79E-07 | 2.04E-06 | 4.880372971 |
| ZNF429  | -0.38418246  | 2.96237969 | -5.065062956 | 7.81E-07 | 2.05E-06 | 4.877447077 |
| CD300LC | -0.356301794 | 0.4831478  | -5.064860208 | 7.82E-07 | 2.05E-06 | 4.876514217 |
| PRRG3   | -0.335182657 | 0.53527071 | -5.063909408 | 7.86E-07 | 2.06E-06 | 4.872139919 |
| ZBTB26  | -0.3728339   | 3.15743654 | -5.063889295 | 7.86E-07 | 2.06E-06 | 4.872047391 |
| NAT2    | -0.062625755 | 0.07998041 | -5.063638416 | 7.87E-07 | 2.06E-06 | 4.870893299 |
| PTPN7   | 0.642002058  | 1.55805845 | 5.063303041  | 7.88E-07 | 2.06E-06 | 4.869350582 |
| LTBP1   | 0.739160161  | 3.17261938 | 5.061864991  | 7.93E-07 | 2.08E-06 | 4.862736535 |
| SELPLG  | 0.682954481  | 4.07567179 | 5.061204272  | 7.96E-07 | 2.08E-06 | 4.859698197 |

|         |              |            |              |          |          |             |
|---------|--------------|------------|--------------|----------|----------|-------------|
| ZBTB14  | -0.335970713 | 3.93366628 | -5.060688501 | 7.98E-07 | 2.09E-06 | 4.857326628 |
| NOP2    | -0.260435877 | 4.29759146 | -5.060152557 | 8.00E-07 | 2.09E-06 | 4.854862513 |
| STAU1   | -0.359377474 | 6.95721753 | -5.05847163  | 8.06E-07 | 2.11E-06 | 4.847135485 |
| TSPAN5  | -0.556357114 | 3.33642943 | -5.058172584 | 8.08E-07 | 2.11E-06 | 4.845761021 |
| TP53RK  | -0.270781888 | 4.28043545 | -5.058097791 | 8.08E-07 | 2.11E-06 | 4.845417273 |
| PATZ1   | -0.362471287 | 5.47906682 | -5.057770184 | 8.09E-07 | 2.12E-06 | 4.843911637 |
| GRK5    | -0.549308156 | 3.36907729 | -5.056764482 | 8.13E-07 | 2.13E-06 | 4.839290067 |
| ZNF416  | -0.313669797 | 3.07668986 | -5.056051573 | 8.16E-07 | 2.13E-06 | 4.836014445 |
| KTN1    | -0.417938289 | 5.38934747 | -5.055552589 | 8.18E-07 | 2.14E-06 | 4.833721973 |
| CD84    | 0.551511391  | 1.54666305 | 5.053799253  | 8.25E-07 | 2.16E-06 | 4.825668125 |
| LUM     | 1.403111313  | 4.84317483 | 5.053186151  | 8.27E-07 | 2.16E-06 | 4.822852417 |
| TMPRSS  | -0.146712974 | 0.37146327 | -5.053168707 | 8.27E-07 | 2.16E-06 | 4.822772306 |
| TSPAN1  | -0.564729298 | 4.70310794 | -5.05217667  | 8.31E-07 | 2.17E-06 | 4.818216919 |
| TRAF3IP | -0.375002667 | 4.34821115 | -5.052118098 | 8.31E-07 | 2.17E-06 | 4.817947984 |
| ZC3H18  | -0.292442522 | 4.08743726 | -5.051904823 | 8.32E-07 | 2.17E-06 | 4.81696874  |
| CES3    | -0.422535523 | 1.03398214 | -5.051032419 | 8.36E-07 | 2.18E-06 | 4.81296348  |
| MEDAG   | 0.842497747  | 3.76322198 | 5.050825674  | 8.36E-07 | 2.18E-06 | 4.812014386 |
| C8orf58 | -0.287604193 | 2.96160554 | -5.04944675  | 8.42E-07 | 2.20E-06 | 4.805685034 |
| KCNA2   | -0.374413139 | 0.45741081 | -5.049318048 | 8.42E-07 | 2.20E-06 | 4.805094353 |
| STX12   | -0.421575676 | 6.82639606 | -5.048316752 | 8.46E-07 | 2.21E-06 | 4.800499322 |
| ZBTB49  | -0.323614642 | 2.70052831 | -5.046655878 | 8.53E-07 | 2.23E-06 | 4.792879069 |
| TENT4B  | -0.317403316 | 2.95423975 | -5.046538531 | 8.54E-07 | 2.23E-06 | 4.792340749 |
| ZNF737  | -0.548738775 | 3.49500646 | -5.046099025 | 8.55E-07 | 2.23E-06 | 4.790324636 |
| RPAP1   | -0.314051781 | 3.42413057 | -5.04584072  | 8.56E-07 | 2.23E-06 | 4.789139798 |
| ZNF517  | -0.291634062 | 3.24662085 | -5.045666439 | 8.57E-07 | 2.23E-06 | 4.788340407 |
| FIGNL1  | 0.373650914  | 2.4401083  | 5.045663888  | 8.57E-07 | 2.23E-06 | 4.788328706 |
| GTF2F1  | -0.29709286  | 6.91435377 | -5.045487653 | 8.58E-07 | 2.24E-06 | 4.78752037  |
| GDI2    | -0.34827193  | 7.25638479 | -5.045439995 | 8.58E-07 | 2.24E-06 | 4.787301782 |
| FAM120E | -0.337361339 | 4.41393077 | -5.045195392 | 8.59E-07 | 2.24E-06 | 4.786179918 |
| CUEDC1  | -0.368540151 | 4.36607154 | -5.044260309 | 8.63E-07 | 2.25E-06 | 4.781891587 |
| TBCK    | -0.318395506 | 3.0944669  | -5.044131865 | 8.63E-07 | 2.25E-06 | 4.781302585 |
| ITGBL1  | 0.629218642  | 1.43289941 | 5.044077416  | 8.64E-07 | 2.25E-06 | 4.781052904 |
| GATD3B  | -0.319174323 | 1.25535807 | -5.044025836 | 8.64E-07 | 2.25E-06 | 4.780816383 |
| TREML2  | 0.193650716  | 0.27880812 | 5.04362141   | 8.66E-07 | 2.25E-06 | 4.77896194  |
| NUGGC   | -0.58800964  | 1.13392527 | -5.042753359 | 8.69E-07 | 2.26E-06 | 4.774982015 |
| PTH1R   | -0.411416018 | 1.08050687 | -5.042550149 | 8.70E-07 | 2.26E-06 | 4.7740504   |
| SNX19   | -0.398123662 | 5.02584248 | -5.042218759 | 8.71E-07 | 2.27E-06 | 4.772531206 |
| APBA3   | -0.245593365 | 3.19806297 | -5.042209947 | 8.71E-07 | 2.27E-06 | 4.772490813 |
| CHD3    | -0.407896857 | 5.42797058 | -5.042113928 | 8.72E-07 | 2.27E-06 | 4.772050649 |
| RAB5B   | -0.265045557 | 6.58556417 | -5.039135152 | 8.84E-07 | 2.30E-06 | 4.758398948 |

|         |              |            |              |          |          |             |
|---------|--------------|------------|--------------|----------|----------|-------------|
| FAM189E | -0.309784229 | 3.44189036 | -5.038670149 | 8.86E-07 | 2.31E-06 | 4.756268441 |
| KCTD21  | -0.319734175 | 3.91294807 | -5.037887457 | 8.89E-07 | 2.31E-06 | 4.752682734 |
| TAF2A   | -0.79242125  | 1.3725965  | -5.037843581 | 8.90E-07 | 2.31E-06 | 4.752481745 |
| PAG1    | 0.487653003  | 2.1026101  | 5.036924737  | 8.94E-07 | 2.32E-06 | 4.748272908 |
| HFM1    | -0.321047975 | 0.73120899 | -5.036623549 | 8.95E-07 | 2.33E-06 | 4.74689343  |
| CD1B    | 0.547342246  | 0.73157234 | 5.036590504  | 8.95E-07 | 2.33E-06 | 4.746742085 |
| SSC5D   | 0.577734007  | 1.7773405  | 5.036503709  | 8.95E-07 | 2.33E-06 | 4.746344564 |
| FAR1    | -0.34361297  | 4.14325752 | -5.036203089 | 8.97E-07 | 2.33E-06 | 4.744967782 |
| ARMS2   | -0.1319327   | 0.15211397 | -5.03538906  | 9.00E-07 | 2.34E-06 | 4.741240022 |
| HMGA2   | 0.899790021  | 2.66186482 | 5.034921125  | 9.02E-07 | 2.34E-06 | 4.739097387 |
| ZMYM6   | -0.2363796   | 2.54644571 | -5.034879252 | 9.02E-07 | 2.34E-06 | 4.738905663 |
| CD5     | 0.694881301  | 1.68480718 | 5.03380196   | 9.07E-07 | 2.36E-06 | 4.733973485 |
| TFIP11  | -0.408267426 | 3.98784264 | -5.033474512 | 9.08E-07 | 2.36E-06 | 4.732474495 |
| SRSF7   | -0.336144398 | 6.06074763 | -5.033434397 | 9.08E-07 | 2.36E-06 | 4.732290865 |
| CRLF1   | 1.570925789  | 4.52941739 | 5.033406646  | 9.09E-07 | 2.36E-06 | 4.73216383  |
| METTL14 | -0.330642098 | 3.65009799 | -5.032927233 | 9.11E-07 | 2.36E-06 | 4.729969347 |
| MR1     | -0.405819739 | 4.4517285  | -5.032214912 | 9.14E-07 | 2.37E-06 | 4.726709061 |
| NP1PB6  | -0.217810651 | 0.47285154 | -5.031071637 | 9.19E-07 | 2.38E-06 | 4.721477092 |
| EIF2AK4 | -0.340752273 | 4.01150864 | -5.031003007 | 9.19E-07 | 2.38E-06 | 4.72116305  |
| IL4R    | 0.474523882  | 4.62172257 | 5.03084372   | 9.20E-07 | 2.39E-06 | 4.720434191 |
| VPS50   | -0.299025965 | 2.91728209 | -5.030219997 | 9.22E-07 | 2.39E-06 | 4.717580361 |
| KXD1    | -0.256958714 | 5.50120454 | -5.030130385 | 9.23E-07 | 2.39E-06 | 4.717170369 |
| TRIM22  | 0.651636512  | 4.83992584 | 5.02960511   | 9.25E-07 | 2.40E-06 | 4.714767246 |
| HENMT1  | -0.43239173  | 2.22380154 | -5.028764581 | 9.29E-07 | 2.41E-06 | 4.710922274 |
| TRIM27  | -0.28505434  | 4.67812112 | -5.028551937 | 9.30E-07 | 2.41E-06 | 4.709949625 |
| HSD11B1 | 0.594786267  | 1.25734397 | 5.028473667  | 9.30E-07 | 2.41E-06 | 4.709591622 |
| DDX27   | -0.287224783 | 5.20822982 | -5.028030808 | 9.32E-07 | 2.41E-06 | 4.707566082 |
| IGLL5   | 1.707189291  | 2.82595097 | 5.027757383  | 9.33E-07 | 2.42E-06 | 4.706315572 |
| EIF2AK1 | -0.201107861 | 6.3461921  | -5.027587613 | 9.34E-07 | 2.42E-06 | 4.705539154 |
| YPEL5   | -0.324404442 | 6.67385634 | -5.025946854 | 9.41E-07 | 2.44E-06 | 4.698036512 |
| IDS     | 0.483149197  | 5.88705346 | 5.025528328  | 9.43E-07 | 2.44E-06 | 4.696123053 |
| EXOSC9  | -0.243028572 | 3.70954341 | -5.025138724 | 9.45E-07 | 2.45E-06 | 4.69434194  |
| LGI2    | -0.514653786 | 1.22235481 | -5.024725933 | 9.47E-07 | 2.45E-06 | 4.69245495  |
| MITD1   | -0.273005036 | 3.42837953 | -5.022360837 | 9.57E-07 | 2.48E-06 | 4.681645841 |
| CLEC12F | 0.401960227  | 0.92190025 | 5.021648932  | 9.61E-07 | 2.49E-06 | 4.678393068 |
| UGT2B1  | -0.140674918 | 0.17867505 | -5.021517322 | 9.61E-07 | 2.49E-06 | 4.677791767 |
| RAC1    | -0.241212115 | 7.9743129  | -5.01936895  | 9.71E-07 | 2.51E-06 | 4.667978114 |
| FBXO22  | -0.262845939 | 2.98858693 | -5.018732042 | 9.74E-07 | 2.52E-06 | 4.665069411 |
| CSNK2A  | -0.306632282 | 5.32463526 | -5.017945967 | 9.78E-07 | 2.53E-06 | 4.661479896 |
| ZCCHC4  | -0.253768216 | 2.70945952 | -5.017768888 | 9.78E-07 | 2.53E-06 | 4.660671348 |



|         |              |            |              |          |          |             |
|---------|--------------|------------|--------------|----------|----------|-------------|
| ACAA2   | -0.583515486 | 5.63146714 | -5.017682945 | 9.79E-07 | 2.53E-06 | 4.66027894  |
| ZNF16   | -0.293073881 | 3.28103896 | -5.017108049 | 9.82E-07 | 2.54E-06 | 4.657654154 |
| OCRL    | -0.401292847 | 4.76380787 | -5.016796518 | 9.83E-07 | 2.54E-06 | 4.656231905 |
| RC3H1   | -0.359303537 | 3.16061479 | -5.01555453  | 9.89E-07 | 2.56E-06 | 4.650562523 |
| IFITM10 | 0.414671839  | 1.52485692 | 5.015535939  | 9.89E-07 | 2.56E-06 | 4.65047767  |
| TMLHE   | -0.318882749 | 2.86890019 | -5.01499412  | 9.91E-07 | 2.56E-06 | 4.648004761 |
| CD177   | 1.165005407  | 1.31870624 | 5.014903511  | 9.92E-07 | 2.56E-06 | 4.647591235 |
| TRMT1L  | -0.317252595 | 3.99639203 | -5.014498234 | 9.94E-07 | 2.57E-06 | 4.645741688 |
| AGR3    | -0.590565032 | 0.88029063 | -5.014196505 | 9.95E-07 | 2.57E-06 | 4.644364778 |
| CDH2    | -1.220018855 | 4.4537179  | -5.014104111 | 9.96E-07 | 2.57E-06 | 4.64394316  |
| LEMD1   | 0.673229296  | 2.702702   | 5.013956885  | 9.96E-07 | 2.57E-06 | 4.643271344 |
| REL     | 0.413467606  | 1.54963428 | 5.013502464  | 9.98E-07 | 2.58E-06 | 4.64119785  |
| COL5A1  | 0.865989388  | 3.50343698 | 5.012687461  | 1.00E-06 | 2.59E-06 | 4.637479429 |
| UGT3A2  | -0.514602324 | 0.52198565 | -5.011286414 | 1.01E-06 | 2.60E-06 | 4.631088359 |
| GPA33   | 0.255166673  | 0.34090529 | 5.010329302  | 1.01E-06 | 2.62E-06 | 4.626723206 |
| GSDMD   | -0.33890228  | 5.57372126 | -5.010225049 | 1.01E-06 | 2.62E-06 | 4.626247777 |
| TOGARA  | -0.385159523 | 3.01956293 | -5.010084032 | 1.01E-06 | 2.62E-06 | 4.625604698 |
| NBEA    | -0.630595206 | 2.99461939 | -5.009859144 | 1.02E-06 | 2.62E-06 | 4.62457918  |
| IQCA1   | -0.563440775 | 4.71352775 | -5.00981126  | 1.02E-06 | 2.62E-06 | 4.62436083  |
| GPR83   | -0.663480699 | 1.70039025 | -5.00889944  | 1.02E-06 | 2.63E-06 | 4.620203231 |
| TCTEX1I | -0.402179997 | 1.26312266 | -5.008872856 | 1.02E-06 | 2.63E-06 | 4.620082023 |
| ASB6    | -0.241041828 | 4.10229013 | -5.008181359 | 1.02E-06 | 2.64E-06 | 4.616929453 |
| KIAA175 | 0.289979649  | 0.57715367 | 5.007460422  | 1.03E-06 | 2.65E-06 | 4.613643045 |
| ZNF583  | -0.234325196 | 1.59334102 | -5.007254377 | 1.03E-06 | 2.65E-06 | 4.612703854 |
| ZNF362  | -0.321611555 | 5.3122089  | -5.007234455 | 1.03E-06 | 2.65E-06 | 4.612613047 |
| IQCK    | -0.420596972 | 3.9821869  | -5.005852029 | 1.04E-06 | 2.67E-06 | 4.606312545 |
| XRCC6   | -0.341451912 | 7.90842501 | -5.005582469 | 1.04E-06 | 2.67E-06 | 4.605084177 |
| ZNF839  | -0.30886966  | 2.61192717 | -5.005503116 | 1.04E-06 | 2.67E-06 | 4.604722576 |
| WDR18   | -0.340710675 | 5.39399102 | -5.005488985 | 1.04E-06 | 2.67E-06 | 4.604658185 |
| H3F3B   | -0.336043771 | 8.30048282 | -5.00520867  | 1.04E-06 | 2.67E-06 | 4.60338088  |
| TMEM23  | -0.342126689 | 3.33702882 | -5.004839449 | 1.04E-06 | 2.68E-06 | 4.601698547 |
| SLC37A4 | -0.2595298   | 3.71356019 | -5.001529873 | 1.06E-06 | 2.72E-06 | 4.586623236 |
| GRIK5   | -0.551967701 | 4.17993091 | -5.001463745 | 1.06E-06 | 2.72E-06 | 4.586322103 |
| ATP2A3  | -0.550512243 | 3.85237502 | -5.001173552 | 1.06E-06 | 2.72E-06 | 4.585000663 |
| KIFAP3  | -0.314513402 | 4.44410649 | -5.001122576 | 1.06E-06 | 2.72E-06 | 4.584768539 |
| TRIM66  | -0.394817771 | 2.08277847 | -5.000633289 | 1.06E-06 | 2.73E-06 | 4.582540655 |
| BMS1    | -0.263528379 | 4.19258212 | -4.99984498  | 1.07E-06 | 2.74E-06 | 4.578951595 |
| CYP21A2 | 0.344083514  | 0.90981383 | 4.999665471  | 1.07E-06 | 2.74E-06 | 4.578134381 |
| WDFY2   | -0.264893853 | 2.81661966 | -4.998493637 | 1.07E-06 | 2.76E-06 | 4.572800208 |
| ZUP1    | -0.264943808 | 3.16738707 | -4.998162584 | 1.07E-06 | 2.76E-06 | 4.571293444 |

|         |              |            |              |          |          |             |
|---------|--------------|------------|--------------|----------|----------|-------------|
| ISM1    | -0.872821218 | 5.08487716 | -4.997975372 | 1.07E-06 | 2.76E-06 | 4.570441397 |
| ZNF513  | -0.371401353 | 4.80328765 | -4.997679869 | 1.08E-06 | 2.76E-06 | 4.56909655  |
| THEMIS2 | 0.650308386  | 4.56877825 | 4.997436811  | 1.08E-06 | 2.77E-06 | 4.567990427 |
| SSBP2   | -0.597155223 | 3.67785647 | -4.997264081 | 1.08E-06 | 2.77E-06 | 4.567204384 |
| PNKP    | -0.293521804 | 5.00188052 | -4.997180739 | 1.08E-06 | 2.77E-06 | 4.566825131 |
| UBE2Q1  | -0.271996579 | 5.93502849 | -4.99428332  | 1.09E-06 | 2.81E-06 | 4.553643367 |
| NRF1    | -0.28849973  | 4.05606141 | -4.993982619 | 1.09E-06 | 2.81E-06 | 4.552275691 |
| SH2D5   | 0.388819207  | 1.16498552 | 4.992709798  | 1.10E-06 | 2.83E-06 | 4.546487287 |
| KLHL10  | -0.152583619 | 0.36229372 | -4.991819592 | 1.11E-06 | 2.84E-06 | 4.542439615 |
| SLC30A4 | -0.345661462 | 2.48511604 | -4.991765373 | 1.11E-06 | 2.84E-06 | 4.542193108 |
| P2RY10  | 0.563631191  | 0.9305251  | 4.991506768  | 1.11E-06 | 2.84E-06 | 4.541017381 |
| BPIFA2  | -0.364081387 | 0.95594657 | -4.991092556 | 1.11E-06 | 2.85E-06 | 4.539134304 |
| HSPA14  | -0.289853675 | 3.52060906 | -4.990849722 | 1.11E-06 | 2.85E-06 | 4.538030398 |
| CORT    | -0.214573145 | 0.65339658 | -4.990737133 | 1.11E-06 | 2.85E-06 | 4.537518595 |
| LRRC32  | -0.525845095 | 4.54435177 | -4.990631764 | 1.11E-06 | 2.85E-06 | 4.537039616 |
| SYT8    | 0.254630861  | 0.29134417 | 4.990154618  | 1.11E-06 | 2.86E-06 | 4.534870754 |
| PDE4A   | -0.526444105 | 4.05717983 | -4.988775669 | 1.12E-06 | 2.88E-06 | 4.528603718 |
| PABPC5  | -0.322869833 | 1.27854589 | -4.988749242 | 1.12E-06 | 2.88E-06 | 4.528483626 |
| MEGF6   | 0.474119119  | 2.44655266 | 4.988668827  | 1.12E-06 | 2.88E-06 | 4.528118204 |
| RAB5A   | -0.325815461 | 5.86093325 | -4.985843329 | 1.14E-06 | 2.92E-06 | 4.515281572 |
| XYLT2   | -0.274734136 | 4.57070686 | -4.98572212  | 1.14E-06 | 2.92E-06 | 4.514731036 |
| MAP1A   | -0.55050512  | 2.22917112 | -4.985719476 | 1.14E-06 | 2.92E-06 | 4.514719026 |
| GPR146  | -0.246037986 | 0.9101897  | -4.985655512 | 1.14E-06 | 2.92E-06 | 4.514428504 |
| MOB3B   | -0.512778747 | 2.65260398 | -4.985461826 | 1.14E-06 | 2.92E-06 | 4.513548807 |
| ARAF    | -0.335271538 | 5.87042209 | -4.984751862 | 1.14E-06 | 2.93E-06 | 4.510324485 |
| LSM7    | -0.356401134 | 5.61009811 | -4.983377269 | 1.15E-06 | 2.95E-06 | 4.504082805 |
| ELP1    | -0.370901677 | 4.44097259 | -4.983137083 | 1.15E-06 | 2.95E-06 | 4.502992329 |
| SRP68   | -0.332733739 | 5.70261574 | -4.982872201 | 1.15E-06 | 2.95E-06 | 4.501789774 |
| KCNK6   | 0.445516932  | 2.13116038 | 4.982478445  | 1.16E-06 | 2.96E-06 | 4.500002239 |
| AURKA   | -0.311979415 | 1.76620631 | -4.982252664 | 1.16E-06 | 2.96E-06 | 4.498977313 |
| RSBN1L  | -0.33994495  | 4.05890997 | -4.981978308 | 1.16E-06 | 2.96E-06 | 4.497731929 |
| EN1     | 0.18197934   | 0.25998275 | 4.981862841  | 1.16E-06 | 2.97E-06 | 4.49720781  |
| YRDC    | -0.280236405 | 4.37500753 | -4.981731462 | 1.16E-06 | 2.97E-06 | 4.496611473 |
| BTK     | 0.532116382  | 1.72550831 | 4.981708217  | 1.16E-06 | 2.97E-06 | 4.496505964 |
| MROH2A  | -0.79193369  | 0.74107807 | -4.981580404 | 1.16E-06 | 2.97E-06 | 4.495925829 |
| HLA-DQF | 0.990940597  | 6.03369057 | 4.980677503  | 1.17E-06 | 2.98E-06 | 4.491827969 |
| CCDC18  | -0.303284105 | 1.52145262 | -4.980590619 | 1.17E-06 | 2.98E-06 | 4.491433674 |
| APEX1   | -0.320030026 | 7.74988479 | -4.980218145 | 1.17E-06 | 2.99E-06 | 4.489743387 |
| RRP15   | -0.300337122 | 2.96060985 | -4.977455073 | 1.18E-06 | 3.02E-06 | 4.477207801 |
| HYI     | -0.402567721 | 4.11103751 | -4.976159055 | 1.19E-06 | 3.04E-06 | 4.471329959 |

|         |              |            |              |          |          |             |
|---------|--------------|------------|--------------|----------|----------|-------------|
| NKPD1   | -0.211851958 | 0.37194996 | -4.975411172 | 1.20E-06 | 3.05E-06 | 4.46793865  |
| BDKRB1  | -0.238432755 | 0.47786587 | -4.975020008 | 1.20E-06 | 3.06E-06 | 4.466165072 |
| ZNF230  | -0.250110652 | 1.95217222 | -4.974807441 | 1.20E-06 | 3.06E-06 | 4.465201315 |
| TRO     | -0.590623059 | 2.47769745 | -4.974590908 | 1.20E-06 | 3.06E-06 | 4.464219612 |
| IBTK    | -0.35579399  | 4.35351181 | -4.97446754  | 1.20E-06 | 3.06E-06 | 4.46366031  |
| GMPS    | -0.327175028 | 4.19929403 | -4.974311624 | 1.20E-06 | 3.07E-06 | 4.462953467 |
| GSC     | -0.334504991 | 0.76767601 | -4.974274075 | 1.20E-06 | 3.07E-06 | 4.46278324  |
| USP11   | -0.375363091 | 6.52394524 | -4.973872801 | 1.20E-06 | 3.07E-06 | 4.460964163 |
| MRC2    | 1.087463094  | 5.73684739 | 4.973612636  | 1.21E-06 | 3.08E-06 | 4.459784835 |
| SLC2A3  | 0.719243372  | 4.37511847 | 4.972790134  | 1.21E-06 | 3.09E-06 | 4.456056757 |
| MAPK9   | -0.291948133 | 4.2355982  | -4.972182294 | 1.21E-06 | 3.09E-06 | 4.453301986 |
| NP1PB2  | -0.665154349 | 1.57750127 | -4.971284192 | 1.22E-06 | 3.11E-06 | 4.449232237 |
| CIB2    | -0.606560094 | 2.994656   | -4.970904059 | 1.22E-06 | 3.11E-06 | 4.447509844 |
| CAT     | -0.565647471 | 7.49729788 | -4.970149901 | 1.23E-06 | 3.12E-06 | 4.44409306  |
| NAA35   | -0.354022253 | 4.11840899 | -4.969770727 | 1.23E-06 | 3.13E-06 | 4.442375334 |
| OPHN1   | -0.397370349 | 1.96649168 | -4.969642454 | 1.23E-06 | 3.13E-06 | 4.441794262 |
| CSPG4   | -0.583715351 | 3.12289139 | -4.96961946  | 1.23E-06 | 3.13E-06 | 4.4416901   |
| TRERF1  | -0.362750008 | 1.85378097 | -4.969562758 | 1.23E-06 | 3.13E-06 | 4.441433245 |
| OLAH    | 0.597650421  | 1.44246664 | 4.968356779  | 1.24E-06 | 3.15E-06 | 4.435970859 |
| CTAGE4  | -0.147393137 | 0.31955667 | -4.968135037 | 1.24E-06 | 3.15E-06 | 4.434966616 |
| CERS2   | -0.439135771 | 6.87051047 | -4.967625028 | 1.24E-06 | 3.16E-06 | 4.432656982 |
| TMC7    | -0.258731095 | 1.12570375 | -4.966787078 | 1.24E-06 | 3.17E-06 | 4.428862659 |
| DDX5    | -0.411163714 | 8.06168027 | -4.966680146 | 1.25E-06 | 3.17E-06 | 4.4283785   |
| COPS7B  | -0.271898877 | 4.22939769 | -4.965982973 | 1.25E-06 | 3.18E-06 | 4.425222083 |
| TAF1    | -0.10330814  | 0.23033896 | -4.965702255 | 1.25E-06 | 3.18E-06 | 4.42395125  |
| UNC79   | -0.143506563 | 0.35514468 | -4.965079681 | 1.25E-06 | 3.19E-06 | 4.421133018 |
| CASKIN2 | -0.352084031 | 5.04911678 | -4.96430458  | 1.26E-06 | 3.20E-06 | 4.417624743 |
| TNFRSF5 | 0.528321433  | 3.27205215 | 4.962812399  | 1.27E-06 | 3.23E-06 | 4.410872081 |
| GOLM1   | -0.474741142 | 5.76043864 | -4.962804392 | 1.27E-06 | 3.23E-06 | 4.410835848 |
| EPHB4   | -0.374066765 | 4.15803412 | -4.961964724 | 1.27E-06 | 3.24E-06 | 4.407036784 |
| LAMA4   | -0.495997956 | 3.66962172 | -4.961685935 | 1.27E-06 | 3.24E-06 | 4.405775529 |
| SPDYE3  | -0.235727346 | 2.52972661 | -4.960967323 | 1.28E-06 | 3.25E-06 | 4.40252475  |
| TRDMT1  | -0.28248537  | 1.85252262 | -4.960792344 | 1.28E-06 | 3.25E-06 | 4.40173326  |
| LARP4B  | -0.289910618 | 4.27308299 | -4.960323905 | 1.28E-06 | 3.26E-06 | 4.399614457 |
| WDR24   | -0.264530432 | 4.05311592 | -4.960319496 | 1.28E-06 | 3.26E-06 | 4.399594515 |
| THNSL2  | -0.589473905 | 4.67994724 | -4.95998974  | 1.29E-06 | 3.27E-06 | 4.398103093 |
| SLC15A1 | -0.323496917 | 0.47323377 | -4.959143354 | 1.29E-06 | 3.28E-06 | 4.394275425 |
| SALL4   | -0.50395433  | 1.20111912 | -4.95837344  | 1.29E-06 | 3.29E-06 | 4.390794058 |
| PDCL    | -0.32644955  | 4.25359162 | -4.958289673 | 1.30E-06 | 3.29E-06 | 4.390415309 |
| ZKSCAN  | -0.313041928 | 2.72947314 | -4.957184185 | 1.30E-06 | 3.31E-06 | 4.385417409 |

|         |              |            |              |          |          |             |
|---------|--------------|------------|--------------|----------|----------|-------------|
| ADCY5   | -0.316565221 | 0.7242487  | -4.957082615 | 1.30E-06 | 3.31E-06 | 4.38495826  |
| BICC1   | 0.508069388  | 1.62299667 | 4.95642425   | 1.31E-06 | 3.32E-06 | 4.381982283 |
| BUB3    | -0.249231241 | 4.46666983 | -4.954909697 | 1.32E-06 | 3.34E-06 | 4.375137356 |
| NINL    | -0.406003776 | 3.49920037 | -4.954105757 | 1.32E-06 | 3.35E-06 | 4.371504703 |
| AP1M2   | -0.3522134   | 7.63023739 | -4.954028349 | 1.32E-06 | 3.35E-06 | 4.371154954 |
| AGMO    | -0.270458778 | 0.35268448 | -4.95393329  | 1.32E-06 | 3.35E-06 | 4.370725464 |
| PPP1R1  | -0.415835641 | 5.24872011 | -4.953758418 | 1.32E-06 | 3.36E-06 | 4.36993538  |
| HIST1H2 | -0.261340993 | 0.5065871  | -4.953042701 | 1.33E-06 | 3.37E-06 | 4.366701961 |
| FOS     | -1.063331272 | 8.5879241  | -4.952682725 | 1.33E-06 | 3.37E-06 | 4.365075833 |
| TNPO1   | -0.395864364 | 4.77389721 | -4.952412725 | 1.33E-06 | 3.38E-06 | 4.363856216 |
| G3BP2   | -0.458581032 | 5.96202351 | -4.951948883 | 1.33E-06 | 3.38E-06 | 4.36176113  |
| PSPC1   | -0.31002692  | 5.21145644 | -4.951465132 | 1.34E-06 | 3.39E-06 | 4.35957629  |
| RMND1   | -0.313348713 | 5.30021443 | -4.951241138 | 1.34E-06 | 3.39E-06 | 4.358564687 |
| SVIP    | -0.330526204 | 5.38145291 | -4.950507975 | 1.34E-06 | 3.40E-06 | 4.355253849 |
| SEPTIN2 | -0.392007959 | 7.47862689 | -4.950135004 | 1.35E-06 | 3.41E-06 | 4.353569729 |
| KDELR1  | -0.281071877 | 8.44187009 | -4.949509085 | 1.35E-06 | 3.42E-06 | 4.350743681 |
| ITM2C   | -0.657722234 | 7.24995333 | -4.949487198 | 1.35E-06 | 3.42E-06 | 4.350644866 |
| ST6GAL1 | -0.388199108 | 4.57085525 | -4.949256931 | 1.35E-06 | 3.42E-06 | 4.349605276 |
| ZFYVE27 | -0.301203863 | 4.9745782  | -4.948367262 | 1.36E-06 | 3.44E-06 | 4.34558906  |
| AMFR    | -0.330547494 | 6.23313439 | -4.947972569 | 1.36E-06 | 3.44E-06 | 4.343807498 |
| THBD    | -0.588419744 | 4.56163481 | -4.946903985 | 1.37E-06 | 3.46E-06 | 4.338984711 |
| USP47   | -0.335979386 | 4.46813605 | -4.946751427 | 1.37E-06 | 3.46E-06 | 4.338296252 |
| TLL2    | -0.38870614  | 0.59361126 | -4.946647672 | 1.37E-06 | 3.46E-06 | 4.337828037 |
| NOB1    | -0.326885268 | 6.13653295 | -4.945939539 | 1.37E-06 | 3.47E-06 | 4.334632669 |
| ZNF148  | -0.425866652 | 4.44092962 | -4.945924229 | 1.37E-06 | 3.47E-06 | 4.334563586 |
| NARS2   | -0.341416386 | 4.32503737 | -4.944873163 | 1.38E-06 | 3.49E-06 | 4.329821482 |
| SYT15   | -0.109249106 | 0.20811378 | -4.944424329 | 1.38E-06 | 3.50E-06 | 4.327796722 |
| NPY5R   | -0.121149568 | 0.17086826 | -4.942866449 | 1.39E-06 | 3.52E-06 | 4.320770072 |
| TRMT13  | -0.348567053 | 3.30815853 | -4.940077338 | 1.41E-06 | 3.57E-06 | 4.30819465  |
| DROSHA  | -0.307144219 | 4.16350099 | -4.939381017 | 1.42E-06 | 3.58E-06 | 4.305056024 |
| UBR3    | -0.430474359 | 4.30522325 | -4.938947318 | 1.42E-06 | 3.58E-06 | 4.303101336 |
| SEMA3G  | -0.526392871 | 3.56557786 | -4.93815857  | 1.42E-06 | 3.60E-06 | 4.299546798 |
| LMBRD2  | -0.403941082 | 3.32343821 | -4.936709009 | 1.43E-06 | 3.62E-06 | 4.293015489 |
| EXOC3   | -0.281731234 | 4.57052313 | -4.936221563 | 1.44E-06 | 3.63E-06 | 4.290819548 |
| PYCR2   | -0.239090206 | 5.57791823 | -4.936014688 | 1.44E-06 | 3.63E-06 | 4.289887636 |
| SFXN1   | -0.2748088   | 3.57511381 | -4.935650696 | 1.44E-06 | 3.64E-06 | 4.28824803  |
| YTHDF1  | -0.281270101 | 5.98537725 | -4.935528922 | 1.44E-06 | 3.64E-06 | 4.28769952  |
| CEACAM  | 0.287946598  | 0.49841691 | 4.935454963  | 1.44E-06 | 3.64E-06 | 4.287366392 |
| SUPT7L  | -0.293195472 | 4.66313471 | -4.935324323 | 1.44E-06 | 3.64E-06 | 4.286777965 |
| SNAP91  | -0.304700729 | 0.37498068 | -4.934958595 | 1.44E-06 | 3.65E-06 | 4.285130728 |

|          |              |            |              |          |          |             |
|----------|--------------|------------|--------------|----------|----------|-------------|
| B3GALN'  | -0.447643981 | 4.43882555 | -4.9331647   | 1.46E-06 | 3.68E-06 | 4.277052507 |
| TCIM     | 0.972953128  | 6.55527449 | 4.933087022  | 1.46E-06 | 3.68E-06 | 4.276702765 |
| CSMD2    | -0.163472272 | 0.28084097 | -4.931080065 | 1.47E-06 | 3.71E-06 | 4.267668079 |
| ZNF134   | -0.334824323 | 3.88781785 | -4.930531506 | 1.48E-06 | 3.72E-06 | 4.26519917  |
| ZNF704   | -0.417367291 | 2.97245407 | -4.929388924 | 1.48E-06 | 3.74E-06 | 4.260057457 |
| WDR38    | -0.229352701 | 0.39677947 | -4.929024773 | 1.49E-06 | 3.75E-06 | 4.258418954 |
| ARPC5L   | -0.28163828  | 5.30271719 | -4.928722678 | 1.49E-06 | 3.75E-06 | 4.257059746 |
| IGFL1    | 0.291518403  | 0.29448325 | 4.927316643  | 1.50E-06 | 3.78E-06 | 4.250734531 |
| GAA      | -0.343969479 | 6.35621344 | -4.92681152  | 1.50E-06 | 3.78E-06 | 4.248462536 |
| KCTD17   | 0.626999918  | 3.66062175 | 4.926691704  | 1.50E-06 | 3.79E-06 | 4.247923645 |
| S1PR5    | -0.268545882 | 0.81754467 | -4.92617721  | 1.51E-06 | 3.79E-06 | 4.24560975  |
| STEAP1   | 0.543353727  | 1.03272351 | 4.925880202  | 1.51E-06 | 3.80E-06 | 4.244274069 |
| LMBR1    | -0.399961652 | 3.95323018 | -4.925821597 | 1.51E-06 | 3.80E-06 | 4.244010522 |
| C11orf49 | -0.361915554 | 4.72919499 | -4.925790918 | 1.51E-06 | 3.80E-06 | 4.243872558 |
| ANGPT2   | -0.56414862  | 2.79777433 | -4.925171904 | 1.51E-06 | 3.81E-06 | 4.241089039 |
| ZMYND1   | 0.329046056  | 2.02025818 | 4.924441725  | 1.52E-06 | 3.82E-06 | 4.237806009 |
| APH1A    | -0.326833091 | 7.62307685 | -4.924261432 | 1.52E-06 | 3.82E-06 | 4.236995439 |
| IL17C    | 0.12868043   | 0.24678242 | 4.923478173  | 1.52E-06 | 3.84E-06 | 4.233474304 |
| SIRPB1   | 0.304796059  | 0.53197209 | 4.921463509  | 1.54E-06 | 3.87E-06 | 4.224419531 |
| TBX3     | -0.497385666 | 6.6603842  | -4.920941019 | 1.54E-06 | 3.88E-06 | 4.222071732 |
| HNRNPR   | -0.365735237 | 5.45220088 | -4.920733359 | 1.54E-06 | 3.89E-06 | 4.221138674 |
| FAM47E   | -0.322726814 | 1.97382963 | -4.9204937   | 1.55E-06 | 3.89E-06 | 4.22006188  |
| TUBA3D   | -0.269055254 | 0.74731119 | -4.920007965 | 1.55E-06 | 3.90E-06 | 4.21787959  |
| DUSP2    | 0.959463841  | 2.99144637 | 4.919082533  | 1.56E-06 | 3.91E-06 | 4.213722338 |
| RGP1     | -0.367488581 | 4.50420575 | -4.91812623  | 1.56E-06 | 3.93E-06 | 4.209427087 |
| PRDM5    | -0.315657618 | 1.96863705 | -4.913927155 | 1.59E-06 | 4.01E-06 | 4.190575048 |
| SNW1     | -0.320162249 | 6.34995186 | -4.91378528  | 1.60E-06 | 4.01E-06 | 4.189938325 |
| NXPH4    | -0.600415577 | 0.94623565 | -4.912223079 | 1.61E-06 | 4.04E-06 | 4.182928278 |
| ITGB1BF  | -0.30605899  | 4.36760072 | -4.912162684 | 1.61E-06 | 4.04E-06 | 4.182657308 |
| NNMT     | 0.877976505  | 3.49648356 | 4.911651523  | 1.61E-06 | 4.05E-06 | 4.180364003 |
| PCED1B   | 0.585954547  | 3.27730566 | 4.91156446   | 1.61E-06 | 4.05E-06 | 4.17997342  |
| LRRTM2   | -0.077996898 | 0.16259934 | -4.910607817 | 1.62E-06 | 4.07E-06 | 4.175682072 |
| RPE      | -0.336482069 | 4.82411516 | -4.908327545 | 1.64E-06 | 4.11E-06 | 4.165455929 |
| CTSH     | 0.811836487  | 6.94135728 | 4.907099799  | 1.65E-06 | 4.13E-06 | 4.159951592 |
| RBM14    | -0.286066866 | 5.1841616  | -4.905715832 | 1.66E-06 | 4.16E-06 | 4.153748232 |
| RPL39    | -0.338347562 | 6.93533182 | -4.905169518 | 1.66E-06 | 4.17E-06 | 4.151299887 |
| RPS29    | -0.376727127 | 6.29661679 | -4.905102329 | 1.66E-06 | 4.17E-06 | 4.150998787 |
| CSTA     | 0.618411976  | 1.8811766  | 4.904916743  | 1.66E-06 | 4.17E-06 | 4.150167133 |
| MTREX    | -0.343509986 | 4.71224856 | -4.904706656 | 1.66E-06 | 4.18E-06 | 4.14922571  |
| PCF11    | -0.369392908 | 4.00782817 | -4.904661185 | 1.66E-06 | 4.18E-06 | 4.149021958 |

|          |              |            |              |          |          |             |
|----------|--------------|------------|--------------|----------|----------|-------------|
| WDR48    | -0.339342471 | 4.7612471  | -4.904095975 | 1.67E-06 | 4.19E-06 | 4.146489381 |
| HMGB1    | -0.313124078 | 6.38425829 | -4.903334838 | 1.67E-06 | 4.20E-06 | 4.143079283 |
| AADAT    | -0.462996346 | 2.85237628 | -4.901989304 | 1.69E-06 | 4.23E-06 | 4.137052003 |
| HIVEP3   | -0.375879005 | 2.34828844 | -4.901908622 | 1.69E-06 | 4.23E-06 | 4.136690635 |
| SYNDIG   | 0.609111794  | 1.74192751 | 4.901674838  | 1.69E-06 | 4.23E-06 | 4.135643562 |
| LMLN     | -0.297176943 | 2.32687214 | -4.900645131 | 1.70E-06 | 4.25E-06 | 4.13103219  |
| LTA      | 0.408651825  | 0.69251632 | 4.900387122  | 1.70E-06 | 4.26E-06 | 4.129876864 |
| PCDHB4   | -0.327391004 | 1.11018849 | -4.899966523 | 1.70E-06 | 4.26E-06 | 4.127993595 |
| CCDC9    | -0.313994871 | 4.74938614 | -4.899822861 | 1.70E-06 | 4.27E-06 | 4.127350363 |
| DYRK1A   | -0.312420696 | 4.53452718 | -4.899756792 | 1.70E-06 | 4.27E-06 | 4.127054556 |
| PDE12    | -0.309045076 | 3.48936657 | -4.899242185 | 1.71E-06 | 4.28E-06 | 4.124750617 |
| FBXO46   | -0.281749429 | 4.4292263  | -4.899012444 | 1.71E-06 | 4.28E-06 | 4.123722116 |
| KDM2B    | -0.262330546 | 2.6218617  | -4.898242839 | 1.71E-06 | 4.30E-06 | 4.120277041 |
| MKNK2    | -0.31316794  | 7.06802127 | -4.898170196 | 1.72E-06 | 4.30E-06 | 4.119951882 |
| KIAA154  | -0.370293986 | 1.79599698 | -4.897421418 | 1.72E-06 | 4.31E-06 | 4.116600512 |
| TP53I13  | -0.380823188 | 4.74730971 | -4.897366574 | 1.72E-06 | 4.31E-06 | 4.116355056 |
| CTU1     | -0.379490911 | 2.46130386 | -4.896530193 | 1.73E-06 | 4.33E-06 | 4.112612127 |
| MADD     | -0.280472523 | 4.04650293 | -4.895929852 | 1.73E-06 | 4.34E-06 | 4.109925841 |
| 5-Mar    | -0.322829283 | 5.04646581 | -4.895034997 | 1.74E-06 | 4.36E-06 | 4.105922222 |
| IFRD2    | -0.305077889 | 5.24357735 | -4.894972489 | 1.74E-06 | 4.36E-06 | 4.105642583 |
| C17orf53 | 0.24668837   | 1.17486398 | 4.894704898  | 1.74E-06 | 4.36E-06 | 4.104445499 |
| ZEB1     | -0.457251773 | 3.04672995 | -4.894517531 | 1.74E-06 | 4.36E-06 | 4.103607335 |
| CDK4     | -0.430698351 | 5.89221357 | -4.894355379 | 1.75E-06 | 4.37E-06 | 4.102881989 |
| MOSMO    | -0.296634387 | 2.80873797 | -4.89429175  | 1.75E-06 | 4.37E-06 | 4.10259737  |
| COQ10B   | -0.304070541 | 5.31158895 | -4.894158549 | 1.75E-06 | 4.37E-06 | 4.102001549 |
| CALHM5   | -0.281899862 | 1.19744867 | -4.893955699 | 1.75E-06 | 4.37E-06 | 4.101094211 |
| DHX34    | -0.306419829 | 3.77261805 | -4.893875881 | 1.75E-06 | 4.37E-06 | 4.100737193 |
| ALDH5A   | -0.363191508 | 4.95298565 | -4.893851035 | 1.75E-06 | 4.37E-06 | 4.100626061 |
| PECR     | -0.534915201 | 4.56319822 | -4.892765971 | 1.76E-06 | 4.40E-06 | 4.095773231 |
| RNF40    | -0.444622788 | 4.8759199  | -4.892509283 | 1.76E-06 | 4.40E-06 | 4.094625353 |
| GALNTL1  | 0.299783299  | 0.6729882  | 4.891668055  | 1.77E-06 | 4.42E-06 | 4.090863825 |
| UBOX5    | -0.261152906 | 3.50714227 | -4.890771715 | 1.78E-06 | 4.43E-06 | 4.086856458 |
| ANK2     | -0.571512045 | 1.3603358  | -4.889792799 | 1.78E-06 | 4.45E-06 | 4.082480606 |
| CACTIN   | -0.270922327 | 3.44683658 | -4.889775562 | 1.78E-06 | 4.45E-06 | 4.08240356  |
| CDS2     | -0.297349734 | 4.37730742 | -4.889270519 | 1.79E-06 | 4.46E-06 | 4.080146257 |
| KCTD1    | -0.374872259 | 3.27789642 | -4.889112732 | 1.79E-06 | 4.47E-06 | 4.079441062 |
| COL6A6   | -0.202976022 | 0.23408512 | -4.888996143 | 1.79E-06 | 4.47E-06 | 4.078920009 |
| GASK1B   | -0.528742998 | 3.71263643 | -4.888770184 | 1.79E-06 | 4.47E-06 | 4.077910189 |
| CAPZA2   | -0.339320868 | 5.40572216 | -4.888046373 | 1.80E-06 | 4.49E-06 | 4.074675705 |
| CFAP44   | -0.462788725 | 1.63812153 | -4.88788198  | 1.80E-06 | 4.49E-06 | 4.073941141 |

|         |              |            |              |          |          |             |
|---------|--------------|------------|--------------|----------|----------|-------------|
| HRK     | 0.784501989  | 2.21781777 | 4.887705029  | 1.80E-06 | 4.49E-06 | 4.073150486 |
| DAW1    | 0.235094149  | 0.353348   | 4.885847047  | 1.82E-06 | 4.53E-06 | 4.064850052 |
| AGK     | -0.27264563  | 3.734304   | -4.885179952 | 1.82E-06 | 4.54E-06 | 4.061870477 |
| UBE3A   | -0.344038167 | 4.55356735 | -4.884038205 | 1.83E-06 | 4.57E-06 | 4.056771661 |
| CCNDBP  | -0.383044456 | 5.12036425 | -4.882013421 | 1.85E-06 | 4.61E-06 | 4.047731803 |
| DNASE1  | -0.349884524 | 4.38959005 | -4.881925109 | 1.85E-06 | 4.61E-06 | 4.047337595 |
| APOL1   | 0.696516868  | 5.71356697 | 4.881784651  | 1.85E-06 | 4.61E-06 | 4.046710632 |
| SELENO  | -0.357083984 | 6.76049188 | -4.881731697 | 1.85E-06 | 4.61E-06 | 4.046474263 |
| GPR176  | -0.43837223  | 3.00374936 | -4.881459775 | 1.85E-06 | 4.62E-06 | 4.045260533 |
| BATF    | 0.761726511  | 2.23901575 | 4.881248773  | 1.86E-06 | 4.62E-06 | 4.044318762 |
| CRNKL1  | -0.274943737 | 4.45687287 | -4.880366928 | 1.86E-06 | 4.64E-06 | 4.040383153 |
| RPS15A  | -0.324349588 | 7.52089779 | -4.879629764 | 1.87E-06 | 4.66E-06 | 4.037093699 |
| SNX5    | -0.37627006  | 6.71943158 | -4.877808653 | 1.89E-06 | 4.69E-06 | 4.028969108 |
| HSPD1   | -0.362124363 | 6.97851603 | -4.877396272 | 1.89E-06 | 4.70E-06 | 4.027129683 |
| ARTN    | -0.253180544 | 1.06945737 | -4.877353176 | 1.89E-06 | 4.70E-06 | 4.026937463 |
| ZC3H3   | -0.335169642 | 4.68141138 | -4.877211402 | 1.89E-06 | 4.71E-06 | 4.026305116 |
| COPB2   | -0.371457831 | 5.86854178 | -4.876888387 | 1.89E-06 | 4.71E-06 | 4.024864444 |
| ZSCAN1  | -0.371232162 | 2.47988396 | -4.875956083 | 1.90E-06 | 4.73E-06 | 4.020706744 |
| CHMP3   | -0.366642444 | 5.4476478  | -4.874941468 | 1.91E-06 | 4.75E-06 | 4.016182719 |
| COLEC1  | 0.642960778  | 1.66709152 | 4.87416578   | 1.92E-06 | 4.77E-06 | 4.012724562 |
| CEP41   | -0.233188819 | 2.01777322 | -4.873760135 | 1.92E-06 | 4.78E-06 | 4.010916305 |
| EVPLL   | -0.26920012  | 0.69651749 | -4.873220547 | 1.93E-06 | 4.79E-06 | 4.008511162 |
| ATP5MF  | -0.065685813 | 0.15262074 | -4.871164854 | 1.94E-06 | 4.83E-06 | 3.999350197 |
| MDFIC   | 0.490282847  | 5.17723568 | 4.869645713  | 1.96E-06 | 4.87E-06 | 3.992582375 |
| TUNAR   | -0.681935164 | 0.61202879 | -4.868148071 | 1.97E-06 | 4.90E-06 | 3.985912048 |
| SULT1C2 | -0.52492526  | 3.38847401 | -4.868073067 | 1.97E-06 | 4.90E-06 | 3.985578031 |
| ATP6V1F | 0.515747771  | 1.57613067 | 4.867833115  | 1.97E-06 | 4.91E-06 | 3.984509483 |
| C8orf37 | -0.325790649 | 2.10012388 | -4.865852925 | 1.99E-06 | 4.95E-06 | 3.97569303  |
| VAC14   | -0.211052228 | 4.60706273 | -4.865305179 | 2.00E-06 | 4.96E-06 | 3.973254811 |
| ZNF593  | -0.346968189 | 2.8891563  | -4.864477367 | 2.01E-06 | 4.98E-06 | 3.969570347 |
| ZNF343  | -0.25910434  | 2.89652137 | -4.86257222  | 2.02E-06 | 5.02E-06 | 3.961092813 |
| NELFB   | -0.298393158 | 6.35443342 | -4.861026738 | 2.04E-06 | 5.06E-06 | 3.954217741 |
| DDX55   | -0.271951514 | 3.1299847  | -4.8603904   | 2.04E-06 | 5.07E-06 | 3.951387519 |
| CCDC13  | -0.175340906 | 0.86445804 | -4.860130263 | 2.05E-06 | 5.08E-06 | 3.950230605 |
| SELL    | 0.726992451  | 3.03067574 | 4.859643525  | 2.05E-06 | 5.09E-06 | 3.948066059 |
| HLA-DRE | 0.876780688  | 9.04401683 | 4.858863673  | 2.06E-06 | 5.11E-06 | 3.944598399 |
| ACE2    | -0.329744103 | 1.44471334 | -4.858169739 | 2.07E-06 | 5.12E-06 | 3.941513166 |
| CHST7   | -0.549679053 | 3.31163218 | -4.858018401 | 2.07E-06 | 5.13E-06 | 3.940840365 |
| TBXT    | -0.396601787 | 0.30875755 | -4.8576196   | 2.07E-06 | 5.14E-06 | 3.93906751  |
| RNF181  | -0.332988803 | 7.53830933 | -4.856644756 | 2.08E-06 | 5.16E-06 | 3.934734377 |

|         |              |            |              |          |          |             |
|---------|--------------|------------|--------------|----------|----------|-------------|
| GSTM2   | -0.514746457 | 3.06602465 | -4.856107201 | 2.08E-06 | 5.17E-06 | 3.932345281 |
| CD80    | 0.301738485  | 0.63732476 | 4.855874238  | 2.09E-06 | 5.17E-06 | 3.931309971 |
| TINF2   | -0.31278036  | 5.79758976 | -4.855660473 | 2.09E-06 | 5.18E-06 | 3.930360019 |
| UVRAG   | -0.313246706 | 3.51887373 | -4.855044472 | 2.10E-06 | 5.19E-06 | 3.927622759 |
| ARHGAP  | -0.417832742 | 1.19872739 | -4.854502961 | 2.10E-06 | 5.21E-06 | 3.925216742 |
| P2RX7   | 0.419374119  | 1.52716773 | 4.852872764  | 2.12E-06 | 5.24E-06 | 3.917974867 |
| STAT1   | 0.726955857  | 6.52950143 | 4.852392535  | 2.12E-06 | 5.25E-06 | 3.915841916 |
| CARHSP  | -0.29034136  | 4.49930664 | -4.852348475 | 2.12E-06 | 5.25E-06 | 3.915646228 |
| CLINT1  | -0.432423392 | 5.37745268 | -4.851483419 | 2.13E-06 | 5.28E-06 | 3.911804532 |
| DNAJA1  | -0.415805819 | 7.32583754 | -4.851226845 | 2.13E-06 | 5.28E-06 | 3.910665199 |
| UNC80   | -0.115451535 | 0.18109095 | -4.851226774 | 2.13E-06 | 5.28E-06 | 3.910664886 |
| FES     | -0.35531558  | 4.12314573 | -4.850816714 | 2.14E-06 | 5.29E-06 | 3.908844091 |
| WFDC1   | -0.2378439   | 0.77563229 | -4.850382272 | 2.14E-06 | 5.30E-06 | 3.906915178 |
| FBXO48  | -0.193344495 | 1.57227713 | -4.84953617  | 2.15E-06 | 5.32E-06 | 3.903158911 |
| GSR     | -0.317845428 | 5.8644893  | -4.84941457  | 2.15E-06 | 5.32E-06 | 3.902619116 |
| LAGE3   | -0.398443614 | 5.65762147 | -4.848424427 | 2.16E-06 | 5.34E-06 | 3.89822416  |
| ZNF629  | -0.286722832 | 4.44491657 | -4.848061912 | 2.16E-06 | 5.35E-06 | 3.896615251 |
| TMEM52  | -0.27110908  | 0.90702965 | -4.847621075 | 2.17E-06 | 5.36E-06 | 3.89465887  |
| SPIDR   | -0.369257557 | 4.51693342 | -4.846647627 | 2.18E-06 | 5.39E-06 | 3.890339341 |
| CDS1    | -0.393792141 | 5.70295034 | -4.845531642 | 2.19E-06 | 5.41E-06 | 3.885388218 |
| HIST1H4 | -0.579319588 | 1.60191915 | -4.845139635 | 2.19E-06 | 5.42E-06 | 3.883649285 |
| FLOT2   | -0.263740148 | 6.82807117 | -4.843985883 | 2.20E-06 | 5.45E-06 | 3.878531944 |
| FBXL12  | -0.283110297 | 4.19308681 | -4.842896341 | 2.22E-06 | 5.48E-06 | 3.873700333 |
| ATP2A2  | -0.456085501 | 5.66457747 | -4.842879893 | 2.22E-06 | 5.48E-06 | 3.873627402 |
| EIF3B   | -0.257782525 | 5.53288401 | -4.842733701 | 2.22E-06 | 5.48E-06 | 3.872979179 |
| NVL     | -0.280636143 | 3.7382057  | -4.841946276 | 2.23E-06 | 5.50E-06 | 3.869487976 |
| CD53    | 0.791147373  | 4.42714332 | 4.841808156  | 2.23E-06 | 5.50E-06 | 3.868875641 |
| COL18A1 | -0.472701641 | 6.0074901  | -4.841403079 | 2.23E-06 | 5.51E-06 | 3.86707988  |
| SUV39H1 | -0.220975489 | 2.67900268 | -4.84130419  | 2.23E-06 | 5.51E-06 | 3.866641508 |
| RASGEF  | -0.486337956 | 2.18517126 | -4.840727308 | 2.24E-06 | 5.53E-06 | 3.86408437  |
| PAX1    | -0.523857787 | 0.40915171 | -4.840504911 | 2.24E-06 | 5.53E-06 | 3.863098625 |
| ACP6    | -0.384179312 | 3.35868446 | -4.840381164 | 2.24E-06 | 5.53E-06 | 3.862550145 |
| RNF144E | -0.553784801 | 5.90215161 | -4.838689769 | 2.26E-06 | 5.58E-06 | 3.855054623 |
| HBB     | -0.947724828 | 5.49133106 | -4.838429283 | 2.26E-06 | 5.58E-06 | 3.85390046  |
| CDH4    | 0.888056402  | 2.27811302 | 4.836661515  | 2.28E-06 | 5.63E-06 | 3.846069165 |
| ERICH1  | -0.224780329 | 2.56998966 | -4.836391109 | 2.28E-06 | 5.63E-06 | 3.844871467 |
| LRRC14  | -0.32590819  | 3.71472037 | -4.836359991 | 2.28E-06 | 5.63E-06 | 3.84473364  |
| GPATCH  | -0.295949764 | 3.3509177  | -4.835873178 | 2.29E-06 | 5.64E-06 | 3.842577566 |
| ACOT6   | -0.079973586 | 0.11220752 | -4.835851256 | 2.29E-06 | 5.64E-06 | 3.842480479 |
| ABCF2   | -0.283138147 | 5.18906689 | -4.835523898 | 2.29E-06 | 5.65E-06 | 3.84103073  |



|          |              |            |              |          |          |             |
|----------|--------------|------------|--------------|----------|----------|-------------|
| ARMC12   | -0.24730364  | 0.6324134  | -4.835507118 | 2.29E-06 | 5.65E-06 | 3.840956422 |
| NKD2     | 0.474746327  | 1.16339855 | 4.83531883   | 2.29E-06 | 5.66E-06 | 3.840122602 |
| EXOSC5   | -0.320580014 | 5.19999097 | -4.834507888 | 2.30E-06 | 5.68E-06 | 3.836531721 |
| RPS6     | -0.320320893 | 10.8821883 | -4.834150361 | 2.31E-06 | 5.69E-06 | 3.834948733 |
| NEK8     | -0.310711369 | 3.68145374 | -4.833940226 | 2.31E-06 | 5.69E-06 | 3.834018385 |
| CCR1     | 0.588899899  | 2.47260024 | 4.833422076  | 2.31E-06 | 5.70E-06 | 3.831724484 |
| XDH      | 0.547649048  | 0.69323511 | 4.833206857  | 2.32E-06 | 5.71E-06 | 3.830771749 |
| RRAGB    | -0.364462904 | 4.6407823  | -4.833182634 | 2.32E-06 | 5.71E-06 | 3.830664519 |
| ICOS     | 0.485495462  | 0.83609914 | 4.832470961  | 2.32E-06 | 5.73E-06 | 3.827514337 |
| CRHBP    | -0.596489837 | 1.75146996 | -4.832141593 | 2.33E-06 | 5.73E-06 | 3.826056536 |
| COPS2    | -0.301647773 | 4.94055438 | -4.832101453 | 2.33E-06 | 5.73E-06 | 3.82587888  |
| PNPLA5   | 0.725704574  | 1.16370868 | 4.831794865  | 2.33E-06 | 5.74E-06 | 3.82452199  |
| IWS1     | -0.318016451 | 5.27937706 | -4.830162574 | 2.35E-06 | 5.78E-06 | 3.817299036 |
| GNAI3    | -0.254645914 | 3.02402252 | -4.829763471 | 2.35E-06 | 5.79E-06 | 3.815533295 |
| RNFT1    | -0.390644796 | 3.4546408  | -4.829572371 | 2.36E-06 | 5.80E-06 | 3.81468786  |
| INSYN2E  | -0.344187142 | 0.29954259 | -4.829332896 | 2.36E-06 | 5.80E-06 | 3.813628456 |
| GDF7     | -0.184606178 | 0.3735218  | -4.829091519 | 2.36E-06 | 5.81E-06 | 3.812560674 |
| STK3     | -0.264720869 | 2.57418963 | -4.828655411 | 2.37E-06 | 5.82E-06 | 3.810631578 |
| HIST1H4  | -0.331264895 | 0.62373084 | -4.828163859 | 2.37E-06 | 5.83E-06 | 3.808457405 |
| CACNA2   | -0.443702877 | 3.46607369 | -4.828012261 | 2.37E-06 | 5.83E-06 | 3.807786911 |
| RNF20    | -0.373125896 | 5.15552144 | -4.827436048 | 2.38E-06 | 5.85E-06 | 3.805238575 |
| SBF1     | -0.440603556 | 5.60296914 | -4.826015223 | 2.40E-06 | 5.89E-06 | 3.798955977 |
| CNOT9    | -0.272264698 | 4.48357087 | -4.824850855 | 2.41E-06 | 5.92E-06 | 3.793808522 |
| PHACTR   | -0.348884451 | 4.35020961 | -4.824658583 | 2.41E-06 | 5.92E-06 | 3.792958627 |
| NR3C1    | -0.365521037 | 4.38397068 | -4.824087325 | 2.42E-06 | 5.94E-06 | 3.790433665 |
| LRRC36   | -0.134653913 | 0.27163338 | -4.822943038 | 2.43E-06 | 5.97E-06 | 3.785376658 |
| CCNB3    | -0.129645245 | 0.3916455  | -4.820503442 | 2.46E-06 | 6.03E-06 | 3.774598569 |
| ATP10D   | -0.459532533 | 3.17778375 | -4.820016982 | 2.46E-06 | 6.05E-06 | 3.772449941 |
| C15orf41 | -0.176653389 | 1.19474077 | -4.819464623 | 2.47E-06 | 6.06E-06 | 3.770010467 |
| FAM50A   | -0.260195441 | 6.69195806 | -4.819249215 | 2.47E-06 | 6.07E-06 | 3.769059186 |
| GOPC     | -0.368824696 | 4.97839879 | -4.818119834 | 2.48E-06 | 6.10E-06 | 3.764072224 |
| HDAC2    | -0.283693841 | 3.9097253  | -4.818028055 | 2.48E-06 | 6.10E-06 | 3.763667002 |
| PDPK1    | -0.348834204 | 3.424999   | -4.817482264 | 2.49E-06 | 6.11E-06 | 3.761257357 |
| RPL26    | -0.34493668  | 8.71089488 | -4.817029744 | 2.50E-06 | 6.12E-06 | 3.759259678 |
| FBH1     | -0.307177852 | 4.65709202 | -4.815956584 | 2.51E-06 | 6.15E-06 | 3.754522763 |
| RNASE2   | 0.467316986  | 1.1646974  | 4.81560097   | 2.51E-06 | 6.16E-06 | 3.752953278 |
| ZBTB16   | -0.645353903 | 2.35984903 | -4.815522102 | 2.51E-06 | 6.16E-06 | 3.752605214 |
| PEMT     | -0.368961447 | 6.25886223 | -4.813123217 | 2.54E-06 | 6.23E-06 | 3.742020536 |
| RPA1     | -0.353560378 | 5.64003518 | -4.812997874 | 2.54E-06 | 6.23E-06 | 3.741467604 |
| SPATS2   | -0.295013197 | 4.41164368 | -4.811566885 | 2.56E-06 | 6.27E-06 | 3.735155834 |

|         |              |            |              |          |          |             |
|---------|--------------|------------|--------------|----------|----------|-------------|
| CEBPZ   | -0.348418495 | 5.13445586 | -4.811202881 | 2.56E-06 | 6.28E-06 | 3.733550545 |
| PUS7L   | -0.295193886 | 2.36590428 | -4.81080271  | 2.57E-06 | 6.29E-06 | 3.731785876 |
| HSPB8   | -0.825073174 | 4.86275258 | -4.809326267 | 2.59E-06 | 6.34E-06 | 3.725276123 |
| NCL     | -0.32950306  | 7.8685058  | -4.808369819 | 2.60E-06 | 6.36E-06 | 3.721059955 |
| ZNF500  | -0.298513007 | 3.04774012 | -4.808284749 | 2.60E-06 | 6.36E-06 | 3.72068499  |
| MYO1F   | 0.482189122  | 2.30272075 | 4.807879654  | 2.60E-06 | 6.38E-06 | 3.718899506 |
| DGKH    | 0.356504486  | 1.83371073 | 4.807738624  | 2.60E-06 | 6.38E-06 | 3.71827794  |
| NMUR2   | -0.33984979  | 0.56410538 | -4.807297066 | 2.61E-06 | 6.39E-06 | 3.716331933 |
| RPF2    | -0.230910766 | 4.58330469 | -4.806875008 | 2.62E-06 | 6.40E-06 | 3.714472006 |
| TRAF3   | -0.336801728 | 3.44600708 | -4.806711552 | 2.62E-06 | 6.41E-06 | 3.713751728 |
| CYTL1   | -0.502978966 | 1.64254532 | -4.806611322 | 2.62E-06 | 6.41E-06 | 3.713310065 |
| SAC3D1  | -0.326803494 | 3.3244854  | -4.805979435 | 2.63E-06 | 6.43E-06 | 3.710525844 |
| EDEM2   | -0.265525268 | 5.62366327 | -4.805925961 | 2.63E-06 | 6.43E-06 | 3.710290244 |
| SCNM1   | -0.26482825  | 4.43905627 | -4.804952296 | 2.64E-06 | 6.45E-06 | 3.706000718 |
| EXT2    | -0.320988695 | 5.40192013 | -4.804433326 | 2.64E-06 | 6.47E-06 | 3.703714672 |
| UEVLD   | -0.330005716 | 3.48285793 | -4.804176139 | 2.65E-06 | 6.48E-06 | 3.702581844 |
| GPBP1L  | -0.322166457 | 5.90046192 | -4.804004173 | 2.65E-06 | 6.48E-06 | 3.701824421 |
| FKBP9   | -0.365014248 | 5.66494571 | -4.80340175  | 2.66E-06 | 6.50E-06 | 3.69917122  |
| CYBB    | 0.726058538  | 3.76183283 | 4.803279112  | 2.66E-06 | 6.50E-06 | 3.698631129 |
| MBTPS1  | -0.361464499 | 5.78057834 | -4.802681523 | 2.67E-06 | 6.52E-06 | 3.695999546 |
| RNF183  | 0.563669102  | 1.09117395 | 4.802535502  | 2.67E-06 | 6.52E-06 | 3.695356561 |
| SP3     | -0.397948259 | 4.61668639 | -4.802464121 | 2.67E-06 | 6.52E-06 | 3.695042252 |
| EPHA6   | -0.171714998 | 0.31314878 | -4.802261203 | 2.67E-06 | 6.53E-06 | 3.694148764 |
| TRIM13  | -0.286171735 | 3.69780774 | -4.801503352 | 2.68E-06 | 6.55E-06 | 3.690812079 |
| ODF3L1  | -0.606225441 | 1.28897548 | -4.801279611 | 2.68E-06 | 6.55E-06 | 3.689827071 |
| POLR3G  | -0.252755007 | 1.32563802 | -4.800655545 | 2.69E-06 | 6.57E-06 | 3.687079858 |
| SGMS2   | 0.749906592  | 4.59328462 | 4.800004246  | 2.70E-06 | 6.59E-06 | 3.684213077 |
| ZNF587E | -0.277237731 | 2.5511602  | -4.799894311 | 2.70E-06 | 6.59E-06 | 3.683729215 |
| CATSPE  | -0.074531427 | 0.08804932 | -4.798734328 | 2.71E-06 | 6.63E-06 | 3.67862429  |
| TMEM15  | 0.379109249  | 0.93725321 | 4.798400019  | 2.72E-06 | 6.64E-06 | 3.677153237 |
| COL24A1 | 0.129370874  | 0.21667185 | 4.797146245  | 2.73E-06 | 6.67E-06 | 3.671637033 |
| GLE1    | -0.286027261 | 4.98181554 | -4.797077813 | 2.74E-06 | 6.67E-06 | 3.671335988 |
| HLA-B   | 0.65620348   | 10.4226704 | 4.79586296   | 2.75E-06 | 6.71E-06 | 3.665992234 |
| SMR3A   | -0.444019048 | 0.52680415 | -4.795544401 | 2.75E-06 | 6.72E-06 | 3.664591183 |
| GORASF  | -0.327433048 | 5.94681671 | -4.795178421 | 2.76E-06 | 6.73E-06 | 3.662981661 |
| UCP3    | -0.260295124 | 1.19305767 | -4.795164335 | 2.76E-06 | 6.73E-06 | 3.662919716 |
| NT5DC4  | 0.066395441  | 0.08074931 | 4.794498821  | 2.77E-06 | 6.75E-06 | 3.659993167 |
| HIST1H3 | -0.1251315   | 0.15325334 | -4.794082055 | 2.77E-06 | 6.76E-06 | 3.658160639 |
| NEBL    | -0.50334513  | 4.88872757 | -4.792691427 | 2.79E-06 | 6.80E-06 | 3.652046988 |
| YBX2    | -0.456945849 | 1.18349072 | -4.791974277 | 2.80E-06 | 6.82E-06 | 3.648894745 |

|          |              |            |              |          |          |             |
|----------|--------------|------------|--------------|----------|----------|-------------|
| RPS11    | -0.297805221 | 11.1672023 | -4.791694582 | 2.80E-06 | 6.83E-06 | 3.647665449 |
| DPYSL3   | 0.86605468   | 5.9408009  | 4.790059864  | 2.82E-06 | 6.88E-06 | 3.640481844 |
| TMCC3    | 0.608460717  | 4.81065881 | 4.789957836  | 2.83E-06 | 6.88E-06 | 3.640033557 |
| SPTLC3   | -0.41821916  | 4.08582194 | -4.789097863 | 2.84E-06 | 6.91E-06 | 3.636255382 |
| TWNK     | -0.288313451 | 3.23698558 | -4.786723075 | 2.87E-06 | 6.98E-06 | 3.625825006 |
| SLC5A4   | -0.342630734 | 0.90146485 | -4.786307038 | 2.87E-06 | 7.00E-06 | 3.623998161 |
| PRDX6    | -0.279496351 | 8.21862192 | -4.786304708 | 2.87E-06 | 7.00E-06 | 3.623987931 |
| NCAM2    | 0.251842988  | 0.49193042 | 4.785053316  | 2.89E-06 | 7.04E-06 | 3.618493793 |
| SH3BGR   | 0.403663529  | 8.08784354 | 4.784917589  | 2.89E-06 | 7.04E-06 | 3.617897968 |
| UPK3A    | -0.628607424 | 0.88444425 | -4.784850992 | 2.89E-06 | 7.04E-06 | 3.61760562  |
| WAS      | 0.611338053  | 2.93226808 | 4.784338494  | 2.90E-06 | 7.06E-06 | 3.615355966 |
| WTAP     | -0.309547683 | 5.43821308 | -4.783586444 | 2.91E-06 | 7.08E-06 | 3.61205514  |
| SIRPB2   | 0.324449373  | 1.0399822  | 4.783304534  | 2.91E-06 | 7.09E-06 | 3.610817917 |
| CDKN2B   | 0.55015196   | 2.78421047 | 4.783288276  | 2.91E-06 | 7.09E-06 | 3.610746569 |
| SERINC3  | -0.338559254 | 6.97066398 | -4.782587079 | 2.92E-06 | 7.11E-06 | 3.607669491 |
| MYOM1    | -0.358302211 | 1.42595525 | -4.782153003 | 2.93E-06 | 7.12E-06 | 3.605764818 |
| LRRRC75F | -0.544681992 | 4.66421354 | -4.782087652 | 2.93E-06 | 7.12E-06 | 3.605478076 |
| BLOC1S1  | -0.300290831 | 4.86959924 | -4.781124391 | 2.94E-06 | 7.15E-06 | 3.601251965 |
| CST3     | -0.360062971 | 8.3158557  | -4.779503885 | 2.96E-06 | 7.20E-06 | 3.594143925 |
| PAPLN    | 0.687041991  | 4.66182347 | 4.778926992  | 2.97E-06 | 7.22E-06 | 3.591613982 |
| C19orf53 | -0.308947291 | 8.03658544 | -4.778350407 | 2.98E-06 | 7.24E-06 | 3.589085641 |
| ELAVL1   | -0.244118706 | 5.13992724 | -4.77733496  | 2.99E-06 | 7.27E-06 | 3.584633503 |
| TBC1D1C  | -0.518379201 | 3.40234693 | -4.777302556 | 2.99E-06 | 7.27E-06 | 3.584491443 |
| OTUD5    | -0.273237294 | 6.33524743 | -4.775207081 | 3.02E-06 | 7.34E-06 | 3.575306568 |
| ZBED6C1  | -0.364928457 | 3.4166662  | -4.775034069 | 3.03E-06 | 7.35E-06 | 3.574548375 |
| HAS3     | -0.709800634 | 3.2711542  | -4.774236667 | 3.04E-06 | 7.37E-06 | 3.571054195 |
| TMEM25   | -0.299184848 | 6.50189952 | -4.7737699   | 3.04E-06 | 7.39E-06 | 3.569009071 |
| OXCT2    | -0.389026315 | 0.88550147 | -4.773240817 | 3.05E-06 | 7.40E-06 | 3.56669111  |
| CALM2    | -0.341731543 | 7.93798139 | -4.772459432 | 3.06E-06 | 7.43E-06 | 3.563268188 |
| WDR66    | -0.393773899 | 2.18375323 | -4.772286331 | 3.06E-06 | 7.43E-06 | 3.562509968 |
| HDGF     | -0.323142141 | 7.52430796 | -4.772190017 | 3.06E-06 | 7.44E-06 | 3.562088104 |
| CYB561F  | -0.305385403 | 3.14234924 | -4.771863091 | 3.07E-06 | 7.45E-06 | 3.560656181 |
| TOM1     | -0.282264025 | 5.21510565 | -4.771766953 | 3.07E-06 | 7.45E-06 | 3.560235118 |
| EHD2     | 0.436953242  | 6.55086017 | 4.771169939  | 3.08E-06 | 7.47E-06 | 3.557620484 |
| NTN3     | -0.149512744 | 0.19207363 | -4.769955051 | 3.10E-06 | 7.51E-06 | 3.552300697 |
| PLEKHF1  | 0.445903566  | 2.42701631 | 4.769821506  | 3.10E-06 | 7.51E-06 | 3.551715997 |
| PTBP2    | -0.352412315 | 2.44708152 | -4.769697273 | 3.10E-06 | 7.51E-06 | 3.551172075 |
| RASGRF1  | -0.374696658 | 1.96173835 | -4.768845266 | 3.11E-06 | 7.54E-06 | 3.547442128 |
| WWP1     | -0.33284581  | 4.30975051 | -4.768350259 | 3.12E-06 | 7.56E-06 | 3.545275326 |
| THAP12   | -0.302986578 | 3.84420836 | -4.768130104 | 3.12E-06 | 7.57E-06 | 3.544311697 |

|         |              |            |              |          |          |             |
|---------|--------------|------------|--------------|----------|----------|-------------|
| FAM184E | -0.069902386 | 0.25780312 | -4.768048989 | 3.12E-06 | 7.57E-06 | 3.543956661 |
| YIPF5   | -0.373133184 | 4.99328483 | -4.767694948 | 3.13E-06 | 7.58E-06 | 3.542407107 |
| MAP2    | 0.658860159  | 4.21220168 | 4.765984527  | 3.15E-06 | 7.64E-06 | 3.534922359 |
| VAMP8   | -0.352806838 | 8.77820168 | -4.765435392 | 3.16E-06 | 7.65E-06 | 3.532519835 |
| DNAH10  | -0.088149811 | 0.19496253 | -4.763949588 | 3.18E-06 | 7.71E-06 | 3.526020451 |
| KCNC1   | -0.058792133 | 0.0788536  | -4.763624472 | 3.19E-06 | 7.72E-06 | 3.524598514 |
| PTPRC   | 0.742367896  | 2.71843475 | 4.76283094   | 3.20E-06 | 7.74E-06 | 3.521128242 |
| POLR1B  | -0.375417279 | 3.90849156 | -4.761952524 | 3.21E-06 | 7.77E-06 | 3.517287322 |
| STAM2   | -0.348344284 | 4.06480972 | -4.761881238 | 3.21E-06 | 7.77E-06 | 3.516975645 |
| TIGIT   | 0.578688044  | 1.10888219 | 4.76152873   | 3.22E-06 | 7.79E-06 | 3.515434473 |
| ARHGAP  | 0.597650139  | 3.01316395 | 4.760012823  | 3.24E-06 | 7.84E-06 | 3.508807972 |
| ZNF878  | -0.11856285  | 0.36861811 | -4.759850194 | 3.24E-06 | 7.84E-06 | 3.508097177 |
| NSD2    | -0.358628663 | 3.38763272 | -4.759543828 | 3.25E-06 | 7.85E-06 | 3.506758208 |
| IBSP    | 0.423643993  | 0.50626824 | 4.758613013  | 3.26E-06 | 7.88E-06 | 3.502690537 |
| ILK     | -0.446328933 | 3.39694296 | -4.75834431  | 3.26E-06 | 7.89E-06 | 3.501516427 |
| PLPPR3  | 0.208885321  | 0.32080466 | 4.757087579  | 3.28E-06 | 7.94E-06 | 3.496025819 |
| WNT9A   | -0.379636427 | 2.12575452 | -4.757034899 | 3.28E-06 | 7.94E-06 | 3.495795689 |
| COL16A1 | 0.456265071  | 4.76134123 | 4.756515383  | 3.29E-06 | 7.96E-06 | 3.493526319 |
| SLC35D1 | -0.388090669 | 3.47535711 | -4.75601615  | 3.30E-06 | 7.97E-06 | 3.491345744 |
| KIF13A  | -0.425931183 | 4.48279778 | -4.75598711  | 3.30E-06 | 7.97E-06 | 3.49121891  |
| PRKAA2  | -0.367580668 | 2.31230177 | -4.754602944 | 3.32E-06 | 8.02E-06 | 3.485174114 |
| CA14    | -0.349433023 | 1.3014966  | -4.753862684 | 3.33E-06 | 8.05E-06 | 3.481941929 |
| SPPL2B  | -0.34189213  | 4.05701295 | -4.75371834  | 3.33E-06 | 8.05E-06 | 3.481311732 |
| RAB25   | -0.370680307 | 7.4098104  | -4.753429123 | 3.34E-06 | 8.06E-06 | 3.480049076 |
| PAIP1   | -0.32798144  | 5.46066717 | -4.753273997 | 3.34E-06 | 8.07E-06 | 3.479371854 |
| RNF39   | 0.442446599  | 1.62054844 | 4.750714914  | 3.38E-06 | 8.16E-06 | 3.468202577 |
| CPA2    | -0.085220984 | 0.12308424 | -4.750691665 | 3.38E-06 | 8.16E-06 | 3.468101125 |
| ITGB6   | 0.641026345  | 3.81014117 | 4.750156267  | 3.39E-06 | 8.18E-06 | 3.465764996 |
| YAF2    | -0.334892376 | 2.95902302 | -4.749859044 | 3.39E-06 | 8.19E-06 | 3.4644682   |
| PIK3R5  | 0.436054894  | 1.46812285 | 4.74913873   | 3.40E-06 | 8.21E-06 | 3.461325726 |
| RARRES  | 0.648393807  | 1.87858487 | 4.749038771  | 3.41E-06 | 8.22E-06 | 3.460889676 |
| CT62    | -0.190362203 | 0.45018157 | -4.747814671 | 3.42E-06 | 8.26E-06 | 3.45555037  |
| PCYOX1  | -0.468719228 | 6.56114222 | -4.747682742 | 3.43E-06 | 8.26E-06 | 3.454974991 |
| SLX4IP  | -0.264839122 | 2.59941257 | -4.747429894 | 3.43E-06 | 8.27E-06 | 3.453872281 |
| ASA2B   | -0.19940154  | 1.83688698 | -4.747119985 | 3.43E-06 | 8.28E-06 | 3.45252079  |
| KRR1    | -0.271883564 | 3.34845369 | -4.746838649 | 3.44E-06 | 8.29E-06 | 3.451293966 |
| DDX54   | -0.273406708 | 5.70996639 | -4.746768117 | 3.44E-06 | 8.29E-06 | 3.450986404 |
| METTL3  | -0.352719629 | 4.20021609 | -4.744632946 | 3.47E-06 | 8.37E-06 | 3.441677656 |
| NOG     | -0.486009615 | 1.00359638 | -4.744527165 | 3.48E-06 | 8.38E-06 | 3.441216572 |
| POPDC3  | -0.594019368 | 0.59726699 | -4.74334409  | 3.49E-06 | 8.42E-06 | 3.436060303 |

|         |              |            |              |          |          |             |
|---------|--------------|------------|--------------|----------|----------|-------------|
| MPG     | -0.337818889 | 6.48756295 | -4.742635152 | 3.51E-06 | 8.45E-06 | 3.432971008 |
| SS18    | -0.272578645 | 5.63600676 | -4.741480848 | 3.52E-06 | 8.49E-06 | 3.427941802 |
| PES1    | -0.307347441 | 5.4623455  | -4.74085054  | 3.53E-06 | 8.51E-06 | 3.425196033 |
| FEZ1    | -0.293273303 | 1.30452995 | -4.73999163  | 3.55E-06 | 8.54E-06 | 3.421454916 |
| TEX19   | -0.059123178 | 0.08431274 | -4.739955736 | 3.55E-06 | 8.54E-06 | 3.421298588 |
| IL10RB  | -0.272682311 | 4.9383516  | -4.739797505 | 3.55E-06 | 8.55E-06 | 3.420609452 |
| BABAM1  | -0.25071133  | 5.13518467 | -4.739657029 | 3.55E-06 | 8.55E-06 | 3.419997661 |
| TCHH    | 0.097500507  | 0.18425866 | 4.738784741  | 3.57E-06 | 8.59E-06 | 3.416199079 |
| QSOX1   | 0.563530268  | 5.33370836 | 4.738150167  | 3.58E-06 | 8.61E-06 | 3.413436047 |
| AKAP8L  | -0.29222713  | 4.92619025 | -4.738128875 | 3.58E-06 | 8.61E-06 | 3.413343343 |
| SLAMF1  | 0.488983636  | 0.94317061 | 4.735998098  | 3.61E-06 | 8.69E-06 | 3.404067919 |
| PPY     | -0.586946764 | 0.39283696 | -4.734731722 | 3.63E-06 | 8.74E-06 | 3.398556954 |
| S100A11 | 0.503203019  | 10.2476855 | 4.734173734  | 3.64E-06 | 8.76E-06 | 3.39612911  |
| SAFB    | -0.257048875 | 5.33401465 | -4.733218384 | 3.66E-06 | 8.80E-06 | 3.391972885 |
| VPS26C  | -0.279369709 | 3.69218556 | -4.73156976  | 3.69E-06 | 8.86E-06 | 3.384802238 |
| SLC37A3 | -0.30191652  | 3.55731036 | -4.731565497 | 3.69E-06 | 8.86E-06 | 3.384783697 |
| GPN1    | -0.296408705 | 4.82279932 | -4.730519002 | 3.70E-06 | 8.90E-06 | 3.380233087 |
| TGFBRA  | -0.354718219 | 4.28230203 | -4.728721969 | 3.73E-06 | 8.97E-06 | 3.372420779 |
| FKBP15  | -0.261056237 | 3.86919736 | -4.728042501 | 3.75E-06 | 9.00E-06 | 3.369467553 |
| GCNT4   | 0.505726639  | 1.52101519 | 4.72797686   | 3.75E-06 | 9.00E-06 | 3.369182269 |
| RPL24   | -0.35525635  | 9.75882616 | -4.726208548 | 3.78E-06 | 9.07E-06 | 3.361498271 |
| ENPP4   | -0.395943361 | 4.21447388 | -4.725344631 | 3.79E-06 | 9.11E-06 | 3.357745094 |
| B3GALT  | -0.520856026 | 0.57550442 | -4.72321283  | 3.83E-06 | 9.19E-06 | 3.348486217 |
| AATK    | -0.539270525 | 1.99875355 | -4.722102918 | 3.85E-06 | 9.24E-06 | 3.343667018 |
| BAG2    | -0.333571984 | 2.6199744  | -4.721566494 | 3.86E-06 | 9.26E-06 | 3.341338226 |
| MICB    | 0.41401853   | 1.82189507 | 4.720781804  | 3.87E-06 | 9.29E-06 | 3.337932025 |
| ZNF501  | -0.314741441 | 2.03522319 | -4.720606588 | 3.87E-06 | 9.30E-06 | 3.337171507 |
| DCTN1   | -0.320427806 | 5.28846801 | -4.719949355 | 3.88E-06 | 9.32E-06 | 3.334319033 |
| HCAR2   | 0.423051978  | 0.77145387 | 4.71990111   | 3.89E-06 | 9.32E-06 | 3.334109652 |
| RAD23A  | -0.278473383 | 6.76407826 | -4.719523501 | 3.89E-06 | 9.34E-06 | 3.332470947 |
| SNX24   | -0.269714882 | 4.39712388 | -4.71935794  | 3.90E-06 | 9.35E-06 | 3.331752496 |
| ABHD5   | -0.401076217 | 4.01824939 | -4.71884652  | 3.90E-06 | 9.37E-06 | 3.329533334 |
| DDB1    | -0.320115004 | 6.08917934 | -4.718312273 | 3.91E-06 | 9.39E-06 | 3.32721533  |
| MFNG    | -0.375069522 | 3.30847029 | -4.718084995 | 3.92E-06 | 9.40E-06 | 3.326229279 |
| CDCP1   | 0.562774309  | 4.67260442 | 4.717858337  | 3.92E-06 | 9.40E-06 | 3.32524596  |
| LST1    | 0.624941668  | 3.1399753  | 4.71783588   | 3.92E-06 | 9.40E-06 | 3.325148536 |
| CCDC28  | -0.425132791 | 3.29679965 | -4.717242476 | 3.93E-06 | 9.43E-06 | 3.32257434  |
| EI24    | -0.26570641  | 5.96284903 | -4.717148823 | 3.93E-06 | 9.43E-06 | 3.322168093 |
| ANXA2   | 0.67391903   | 7.28595531 | 4.716654529  | 3.94E-06 | 9.45E-06 | 3.32002408  |
| RECQL5  | -0.307928543 | 4.36305353 | -4.715853508 | 3.96E-06 | 9.48E-06 | 3.316550036 |

|         |              |            |              |          |          |             |
|---------|--------------|------------|--------------|----------|----------|-------------|
| DEUP1   | -0.149920746 | 0.37806704 | -4.715802369 | 3.96E-06 | 9.48E-06 | 3.31632826  |
| THADA   | -0.379589559 | 3.47968557 | -4.715697327 | 3.96E-06 | 9.49E-06 | 3.315872732 |
| GPDI    | -0.473058465 | 1.8587522  | -4.715068532 | 3.97E-06 | 9.51E-06 | 3.313146056 |
| SMN1    | -0.268502    | 2.12402783 | -4.714740436 | 3.98E-06 | 9.52E-06 | 3.311723436 |
| HOOK3   | 0.413344785  | 4.34141808 | 4.714123541  | 3.99E-06 | 9.55E-06 | 3.309048815 |
| EHBP1L  | 0.478874124  | 4.0892462  | 4.713979026  | 3.99E-06 | 9.55E-06 | 3.308422296 |
| JRK     | -0.326992961 | 2.33023116 | -4.713916432 | 3.99E-06 | 9.56E-06 | 3.308150935 |
| REX1BD  | -0.435442137 | 4.28485539 | -4.713579728 | 4.00E-06 | 9.57E-06 | 3.306691293 |
| NUPR1   | -0.878774833 | 6.05224556 | -4.71310343  | 4.01E-06 | 9.59E-06 | 3.304626647 |
| ARL8A   | -0.241646401 | 6.53143022 | -4.712419666 | 4.02E-06 | 9.62E-06 | 3.301662992 |
| RRP7A   | -0.374145869 | 5.08054308 | -4.711882103 | 4.03E-06 | 9.64E-06 | 3.29933327  |
| ACKR2   | -0.194938533 | 0.56617209 | -4.711360644 | 4.04E-06 | 9.66E-06 | 3.297073555 |
| TPP2    | -0.347116291 | 4.49899894 | -4.710996817 | 4.05E-06 | 9.67E-06 | 3.295497055 |
| NRG1    | -0.601513292 | 1.79337191 | -4.710918516 | 4.05E-06 | 9.68E-06 | 3.295157785 |
| PFKL    | -0.307141528 | 5.69285282 | -4.710841643 | 4.05E-06 | 9.68E-06 | 3.294824701 |
| KLHL4   | -0.182848557 | 0.34148937 | -4.710396203 | 4.06E-06 | 9.70E-06 | 3.292894759 |
| GSKIP   | -0.292732912 | 3.71680369 | -4.709940964 | 4.06E-06 | 9.72E-06 | 3.290922515 |
| S100A2  | 0.895420158  | 4.59143258 | 4.708832449  | 4.09E-06 | 9.76E-06 | 3.286120735 |
| GABPB2  | -0.266219726 | 2.70138129 | -4.708798646 | 4.09E-06 | 9.76E-06 | 3.285974327 |
| TNFSF13 | 0.54533899   | 2.09339378 | 4.708326844  | 4.09E-06 | 9.78E-06 | 3.283930913 |
| FPR2    | 0.251858273  | 0.29907714 | 4.707522004  | 4.11E-06 | 9.82E-06 | 3.280445478 |
| LYN     | 0.434318247  | 4.83124843 | 4.70727784   | 4.11E-06 | 9.83E-06 | 3.279388202 |
| RPL10   | -0.309354619 | 9.57051093 | -4.705089717 | 4.15E-06 | 9.92E-06 | 3.269915281 |
| AASDHP  | -0.332991422 | 4.24767534 | -4.703609325 | 4.18E-06 | 9.99E-06 | 3.263508399 |
| MOSPD2  | -0.409272453 | 3.73441711 | -4.702740637 | 4.20E-06 | 1.00E-05 | 3.259749657 |
| VIP     | -0.308344205 | 0.76984148 | -4.702638237 | 4.20E-06 | 1.00E-05 | 3.25930662  |
| TRIM63  | 0.590344415  | 1.30405463 | 4.701839417  | 4.22E-06 | 1.01E-05 | 3.255850769 |
| GPR135  | -0.295653751 | 1.72790766 | -4.701247788 | 4.23E-06 | 1.01E-05 | 3.253291583 |
| RIPOR2  | 0.610515416  | 2.14243296 | 4.701074198  | 4.23E-06 | 1.01E-05 | 3.252540743 |
| HIC1    | -0.370355604 | 1.65846659 | -4.6997217   | 4.26E-06 | 1.02E-05 | 3.246691495 |
| GNL1    | -0.315395905 | 5.3335747  | -4.699057351 | 4.27E-06 | 1.02E-05 | 3.243818855 |
| CDC73   | -0.39420195  | 4.45667803 | -4.696858353 | 4.31E-06 | 1.03E-05 | 3.234312839 |
| SLC39A1 | -0.302446035 | 6.7681545  | -4.696417909 | 4.32E-06 | 1.03E-05 | 3.232409303 |
| APOL5   | -0.135199383 | 0.26750984 | -4.696241435 | 4.32E-06 | 1.03E-05 | 3.231646648 |
| EMP2    | 0.537781486  | 4.7432546  | 4.695120953  | 4.35E-06 | 1.04E-05 | 3.226804907 |
| OCM     | -0.176828831 | 0.40305667 | -4.694995904 | 4.35E-06 | 1.04E-05 | 3.226264612 |
| TAOK3   | -0.34129155  | 3.90573148 | -4.694914668 | 4.35E-06 | 1.04E-05 | 3.225913628 |
| TRPM6   | -0.164745848 | 0.27092312 | -4.694133514 | 4.36E-06 | 1.04E-05 | 3.222538866 |
| SNRNP7  | -0.400747114 | 6.84314421 | -4.693672264 | 4.37E-06 | 1.04E-05 | 3.22054638  |
| GTF3C4  | -0.387003539 | 3.79896062 | -4.693492886 | 4.38E-06 | 1.04E-05 | 3.219771557 |

|         |              |            |              |          |          |             |
|---------|--------------|------------|--------------|----------|----------|-------------|
| GLIPR1L | -0.179710471 | 0.66952289 | -4.693066222 | 4.39E-06 | 1.04E-05 | 3.217928681 |
| SLC29A2 | -0.337946607 | 3.94060083 | -4.692525646 | 4.40E-06 | 1.05E-05 | 3.215593994 |
| CITED4  | 0.541314141  | 4.7866551  | 4.691506009  | 4.42E-06 | 1.05E-05 | 3.21119091  |
| PRPH2   | -0.665428627 | 1.52169139 | -4.690561819 | 4.44E-06 | 1.06E-05 | 3.207114342 |
| PLCB2   | 0.474147212  | 2.08858261 | 4.689806054  | 4.45E-06 | 1.06E-05 | 3.203851806 |
| PIBF1   | -0.387440451 | 4.35988165 | -4.688742302 | 4.47E-06 | 1.06E-05 | 3.199260474 |
| VAMP1   | -0.571826296 | 4.34875875 | -4.688588465 | 4.48E-06 | 1.07E-05 | 3.198596563 |
| REP15   | -0.179091487 | 0.82092901 | -4.688502929 | 4.48E-06 | 1.07E-05 | 3.198227422 |
| INHA    | -0.337782822 | 0.94211489 | -4.687759962 | 4.49E-06 | 1.07E-05 | 3.195021313 |
| TTI1    | -0.290974667 | 4.18450477 | -4.687420761 | 4.50E-06 | 1.07E-05 | 3.193557706 |
| MYCBPA  | -0.230558642 | 0.62594194 | -4.687320348 | 4.50E-06 | 1.07E-05 | 3.193124458 |
| TSHR    | -0.541603674 | 8.08516589 | -4.686296554 | 4.52E-06 | 1.08E-05 | 3.188707549 |
| PRICKLE | -0.260820286 | 0.90563928 | -4.686064345 | 4.53E-06 | 1.08E-05 | 3.187705853 |
| KLHL3   | -0.520683173 | 2.40180434 | -4.686026363 | 4.53E-06 | 1.08E-05 | 3.187542012 |
| HIST2H2 | -0.405101188 | 1.70650824 | -4.685659135 | 4.53E-06 | 1.08E-05 | 3.185957968 |
| RPS27   | -0.377157734 | 10.7685414 | -4.684368493 | 4.56E-06 | 1.08E-05 | 3.180391604 |
| RTL8A   | -0.245104371 | 6.79451807 | -4.684035486 | 4.57E-06 | 1.09E-05 | 3.178955601 |
| TMEM13  | -0.287152778 | 4.4427686  | -4.683775169 | 4.57E-06 | 1.09E-05 | 3.177833113 |
| KIF5A   | -0.693231023 | 1.37047333 | -4.683708921 | 4.57E-06 | 1.09E-05 | 3.177547459 |
| AVEN    | -0.320508003 | 4.00879951 | -4.682127612 | 4.61E-06 | 1.09E-05 | 3.170730053 |
| PPP6R1  | -0.348010101 | 5.51060358 | -4.682064651 | 4.61E-06 | 1.09E-05 | 3.170458651 |
| DHRS1   | -0.289369289 | 4.81143288 | -4.680235112 | 4.65E-06 | 1.10E-05 | 3.162573576 |
| SCYL3   | -0.30570415  | 2.9808442  | -4.679600567 | 4.66E-06 | 1.11E-05 | 3.159839374 |
| PLD4    | 0.396524191  | 1.63712466 | 4.679251136  | 4.67E-06 | 1.11E-05 | 3.158333838 |
| RPIA    | -0.258998527 | 5.01461996 | -4.678738424 | 4.68E-06 | 1.11E-05 | 3.156124972 |
| ZNF565  | -0.21326069  | 1.61751854 | -4.678293429 | 4.69E-06 | 1.11E-05 | 3.154208006 |
| VAMP5   | -0.543053035 | 6.43743096 | -4.677989647 | 4.69E-06 | 1.11E-05 | 3.152899454 |
| STK38   | 0.3444984    | 4.65855911 | 4.677948546  | 4.69E-06 | 1.11E-05 | 3.152722419 |
| FRK     | -0.345269358 | 0.78589963 | -4.677824878 | 4.70E-06 | 1.11E-05 | 3.152189735 |
| CTCF    | -0.31883535  | 5.33660351 | -4.677531626 | 4.70E-06 | 1.12E-05 | 3.150926647 |
| RNF34   | -0.26631059  | 4.08502396 | -4.677130328 | 4.71E-06 | 1.12E-05 | 3.149198293 |
| PVALB   | -0.884942673 | 1.0736226  | -4.676958165 | 4.72E-06 | 1.12E-05 | 3.148456839 |
| MOGS    | -0.278662864 | 5.75752892 | -4.676934553 | 4.72E-06 | 1.12E-05 | 3.148355152 |
| RTP3    | -0.15287394  | 0.23489541 | -4.675381046 | 4.75E-06 | 1.13E-05 | 3.141665748 |
| AGFG2   | -0.296062019 | 4.05168728 | -4.674663736 | 4.76E-06 | 1.13E-05 | 3.138577642 |
| GID8    | -0.307904405 | 5.7107179  | -4.674439667 | 4.77E-06 | 1.13E-05 | 3.137613078 |
| ITGA11  | 0.454347223  | 1.34417198 | 4.674316467  | 4.77E-06 | 1.13E-05 | 3.13708275  |
| GUCA1B  | -0.285167812 | 1.03439142 | -4.673920404 | 4.78E-06 | 1.13E-05 | 3.135377929 |
| TMEM14  | -0.36282079  | 3.12785363 | -4.673134116 | 4.80E-06 | 1.14E-05 | 3.131993774 |
| DAPK2   | 0.858621098  | 5.90220984 | 4.672536129  | 4.81E-06 | 1.14E-05 | 3.129420381 |

|         |              |            |              |          |          |             |
|---------|--------------|------------|--------------|----------|----------|-------------|
| GTF3C2  | -0.30881053  | 5.06429283 | -4.671654614 | 4.83E-06 | 1.14E-05 | 3.125627354 |
| GBA     | -0.330053816 | 5.50650358 | -4.671315205 | 4.84E-06 | 1.15E-05 | 3.124167088 |
| SLC52A2 | -0.287722181 | 5.18372804 | -4.670834087 | 4.85E-06 | 1.15E-05 | 3.122097293 |
| NUP50   | -0.310775727 | 3.75432187 | -4.670199232 | 4.86E-06 | 1.15E-05 | 3.119366381 |
| HMGCS2  | -0.452343018 | 0.36848663 | -4.6697977   | 4.87E-06 | 1.15E-05 | 3.117639302 |
| GMPR    | -0.37913959  | 3.72369998 | -4.669763267 | 4.87E-06 | 1.15E-05 | 3.117491207 |
| PSTPIP1 | 0.498250297  | 1.44687329 | 4.669710107  | 4.87E-06 | 1.15E-05 | 3.117262562 |
| GSG1    | -0.053697456 | 0.09950852 | -4.668032843 | 4.91E-06 | 1.16E-05 | 3.110049742 |
| SQOR    | -0.284964534 | 5.41949058 | -4.667981155 | 4.91E-06 | 1.16E-05 | 3.109827499 |
| FAAP24  | -0.258077663 | 2.15692286 | -4.667916212 | 4.91E-06 | 1.16E-05 | 3.10954827  |
| GFPT1   | -0.464148391 | 5.61138408 | -4.667564668 | 4.92E-06 | 1.16E-05 | 3.108036813 |
| CACNA1  | -0.129287702 | 0.35478944 | -4.66685433  | 4.94E-06 | 1.17E-05 | 3.104256989 |
| PPIL4   | -0.377334728 | 5.4480915  | -4.666107487 | 4.95E-06 | 1.17E-05 | 3.101772727 |
| TMED6   | -0.160420381 | 0.91005241 | -4.666007851 | 4.95E-06 | 1.17E-05 | 3.101344475 |
| KRT85   | -0.478595309 | 0.29304366 | -4.665737556 | 4.96E-06 | 1.17E-05 | 3.100182741 |
| RAB11FI | -0.30618297  | 4.87921349 | -4.664554901 | 4.99E-06 | 1.18E-05 | 3.095100333 |
| TPK1    | -0.226077505 | 1.71978926 | -4.663251986 | 5.01E-06 | 1.19E-05 | 3.089502366 |
| EXOSC6  | -0.308009677 | 4.57783256 | -4.663030758 | 5.02E-06 | 1.19E-05 | 3.088551993 |
| TP53TG5 | -0.180060609 | 0.62919545 | -4.662229729 | 5.04E-06 | 1.19E-05 | 3.08511117  |
| GABRR3  | -0.038233154 | 0.0295947  | -4.662006718 | 5.04E-06 | 1.19E-05 | 3.084153311 |
| PIK3CD  | 0.527809415  | 2.92038817 | 4.661821908  | 5.05E-06 | 1.19E-05 | 3.083359563 |
| TECPR1  | -0.272628085 | 3.83125119 | -4.661797804 | 5.05E-06 | 1.19E-05 | 3.083256037 |
| KLC3    | 0.457034171  | 1.53552006 | 4.660555484  | 5.08E-06 | 1.20E-05 | 3.077921047 |
| BOLA2B  | -0.178583629 | 0.66985898 | -4.660174866 | 5.08E-06 | 1.20E-05 | 3.076286774 |
| IVNS1AB | -0.353499864 | 5.41366405 | -4.658388718 | 5.12E-06 | 1.21E-05 | 3.068619011 |
| RPS12   | -0.383682016 | 11.3718309 | -4.658008699 | 5.13E-06 | 1.21E-05 | 3.066987942 |
| CD302   | -0.477655162 | 2.97008045 | -4.657957451 | 5.13E-06 | 1.21E-05 | 3.066767995 |
| GPR87   | 0.436657338  | 0.58378889 | 4.65718522   | 5.15E-06 | 1.22E-05 | 3.063453904 |
| GYPC    | -0.461552571 | 3.43563833 | -4.656560906 | 5.17E-06 | 1.22E-05 | 3.060774952 |
| FCN3    | -0.523344687 | 2.69084992 | -4.655904196 | 5.18E-06 | 1.22E-05 | 3.057957317 |
| MPV17L  | -0.361695144 | 2.28523657 | -4.654776102 | 5.21E-06 | 1.23E-05 | 3.05311797  |
| CCL23   | 0.411081014  | 0.90713497 | 4.651943504  | 5.27E-06 | 1.24E-05 | 3.040970931 |
| KCTD7   | -0.350734109 | 2.83350575 | -4.651887006 | 5.28E-06 | 1.24E-05 | 3.040728715 |
| DHX9    | -0.390468169 | 6.33158393 | -4.651719207 | 5.28E-06 | 1.25E-05 | 3.040009347 |
| MINDY4  | -0.267875321 | 1.15143733 | -4.651334091 | 5.29E-06 | 1.25E-05 | 3.038358403 |
| HS6ST1  | -0.356982892 | 3.96178005 | -4.650954534 | 5.30E-06 | 1.25E-05 | 3.036731398 |
| ZSCAN2  | -0.312996266 | 4.08889136 | -4.64989872  | 5.32E-06 | 1.25E-05 | 3.032206155 |
| BRCA2   | 0.176866758  | 0.69883248 | 4.649734525  | 5.33E-06 | 1.26E-05 | 3.031502492 |
| ERMP1   | -0.490392902 | 5.64292794 | -4.649660072 | 5.33E-06 | 1.26E-05 | 3.031183425 |
| TMEM22  | -0.385949874 | 3.47093029 | -4.64922778  | 5.34E-06 | 1.26E-05 | 3.029330945 |



|          |              |            |              |          |          |             |
|----------|--------------|------------|--------------|----------|----------|-------------|
| YTHDC1   | -0.316191299 | 5.19522664 | -4.64868537  | 5.35E-06 | 1.26E-05 | 3.02700678  |
| FNDC11   | 0.277817334  | 0.71868549 | 4.648593452  | 5.35E-06 | 1.26E-05 | 3.026612947 |
| C10orf14 | 0.371317609  | 0.64547232 | 4.64792226   | 5.37E-06 | 1.26E-05 | 3.023737337 |
| CUL3     | -0.354354442 | 4.31538403 | -4.64740853  | 5.38E-06 | 1.27E-05 | 3.02153658  |
| NUDT4    | -0.361082139 | 3.99799965 | -4.646595169 | 5.40E-06 | 1.27E-05 | 3.018052663 |
| EPB41L5  | -0.431267008 | 3.69675801 | -4.646308708 | 5.41E-06 | 1.27E-05 | 3.016825771 |
| ARHGAP   | -0.441186732 | 3.72183471 | -4.645743559 | 5.42E-06 | 1.28E-05 | 3.014405463 |
| KLK11    | 1.4040031    | 2.31747735 | 4.645608282  | 5.43E-06 | 1.28E-05 | 3.013826161 |
| ZNF92    | -0.344675867 | 2.91796121 | -4.644679478 | 5.45E-06 | 1.28E-05 | 3.009849105 |
| TMEM94   | -0.286642643 | 5.0316846  | -4.644455058 | 5.45E-06 | 1.28E-05 | 3.008888255 |
| TAB1     | -0.268726064 | 4.54863913 | -4.643662842 | 5.47E-06 | 1.29E-05 | 3.005496727 |
| GDE1     | -0.30396517  | 5.8309459  | -4.643428748 | 5.48E-06 | 1.29E-05 | 3.004494646 |
| HDLBP    | -0.316874087 | 6.9505089  | -4.64329996  | 5.48E-06 | 1.29E-05 | 3.003943363 |
| ATP8B1   | -0.471005843 | 4.97278564 | -4.642952691 | 5.49E-06 | 1.29E-05 | 3.002456934 |
| TGFB2    | 0.693460496  | 2.8072376  | 4.642798023  | 5.49E-06 | 1.29E-05 | 3.001794931 |
| ZNF799   | -0.186171159 | 1.44960944 | -4.642780278 | 5.50E-06 | 1.29E-05 | 3.001718983 |
| TSPAN9   | -0.393865492 | 5.24472829 | -4.642502909 | 5.50E-06 | 1.29E-05 | 3.000531851 |
| ATAD1    | -0.294983852 | 4.94443015 | -4.642161778 | 5.51E-06 | 1.30E-05 | 2.999071905 |
| ZNF45    | -0.333448982 | 3.22543174 | -4.642124314 | 5.51E-06 | 1.30E-05 | 2.998911575 |
| KDM4A    | -0.362670402 | 5.06189469 | -4.641562246 | 5.53E-06 | 1.30E-05 | 2.996506289 |
| ZNF100   | 0.447888102  | 2.60497874 | 4.641558075  | 5.53E-06 | 1.30E-05 | 2.996488445 |
| DLL3     | -0.420647973 | 0.65527581 | -4.641120711 | 5.54E-06 | 1.30E-05 | 2.994616984 |
| PPP2R5I  | -0.288838881 | 4.25164576 | -4.639333327 | 5.58E-06 | 1.31E-05 | 2.986970398 |
| CD2      | 0.877341032  | 3.24176033 | 4.638909246  | 5.59E-06 | 1.31E-05 | 2.985156506 |
| ALDH3A1  | -0.377673737 | 6.68387737 | -4.638315495 | 5.61E-06 | 1.32E-05 | 2.982617132 |
| NIPAL4   | 0.339257451  | 0.66810481 | 4.637532451  | 5.63E-06 | 1.32E-05 | 2.979268606 |
| HEATR4   | -0.138889228 | 0.62548191 | -4.637421058 | 5.63E-06 | 1.32E-05 | 2.978792295 |
| EVI2A    | 0.610298671  | 2.52588182 | 4.637268992  | 5.63E-06 | 1.32E-05 | 2.978142086 |
| IFITM2   | -0.449943941 | 6.33287457 | -4.634825849 | 5.69E-06 | 1.34E-05 | 2.967698057 |
| LOXL1    | 0.577871473  | 3.31934143 | 4.634607891  | 5.70E-06 | 1.34E-05 | 2.966766546 |
| PLXNA4   | -0.651436883 | 2.02651045 | -4.63458516  | 5.70E-06 | 1.34E-05 | 2.966669403 |
| GRM3     | -0.108009878 | 0.1217374  | -4.633846676 | 5.72E-06 | 1.34E-05 | 2.963513561 |
| ODF2     | -0.273960924 | 3.96865516 | -4.633686956 | 5.72E-06 | 1.34E-05 | 2.962831067 |
| TRAK1    | -0.331842067 | 4.8714522  | -4.633072461 | 5.74E-06 | 1.35E-05 | 2.960205481 |
| SERP2    | -0.497308847 | 2.38816609 | -4.632577027 | 5.75E-06 | 1.35E-05 | 2.958088826 |
| TJAP1    | -0.273255137 | 3.94791108 | -4.632465973 | 5.75E-06 | 1.35E-05 | 2.957614393 |
| RCAN3    | -0.352450953 | 4.53168844 | -4.632023805 | 5.77E-06 | 1.35E-05 | 2.955725505 |
| UPK2     | 0.476219799  | 0.86756725 | 4.630213405  | 5.81E-06 | 1.36E-05 | 2.9479933   |
| GALE     | 0.737598904  | 5.32950676 | 4.62876723   | 5.85E-06 | 1.37E-05 | 2.941818529 |
| LSP1     | 0.726673571  | 3.4246455  | 4.628685454  | 5.85E-06 | 1.37E-05 | 2.941469417 |

|         |              |            |              |          |          |             |
|---------|--------------|------------|--------------|----------|----------|-------------|
| PMM1    | -0.277211169 | 3.62845368 | -4.628458122 | 5.86E-06 | 1.37E-05 | 2.940498933 |
| DENR    | -0.293683078 | 5.69543392 | -4.628406604 | 5.86E-06 | 1.37E-05 | 2.940279006 |
| PRKAR1. | -0.377473403 | 7.51090245 | -4.628400543 | 5.86E-06 | 1.37E-05 | 2.940253133 |
| KCTD12  | 0.624654006  | 5.17461564 | 4.628387661  | 5.86E-06 | 1.37E-05 | 2.940198141 |
| GNG3    | -0.154573664 | 0.54945784 | -4.628168509 | 5.87E-06 | 1.37E-05 | 2.93926263  |
| TRAFD1  | -0.282199041 | 4.85192563 | -4.628131331 | 5.87E-06 | 1.37E-05 | 2.93910393  |
| WDR11   | -0.349226788 | 4.1422289  | -4.628023033 | 5.87E-06 | 1.37E-05 | 2.938641645 |
| CALHM4  | -0.219575143 | 0.14490532 | -4.628004359 | 5.87E-06 | 1.37E-05 | 2.938561934 |
| ACOX3   | -0.251222237 | 3.98603609 | -4.626005677 | 5.92E-06 | 1.39E-05 | 2.930031981 |
| COMT    | -0.305461626 | 5.71557904 | -4.625982442 | 5.92E-06 | 1.39E-05 | 2.929932839 |
| PLGLB1  | -0.090138941 | 0.23273978 | -4.625426347 | 5.94E-06 | 1.39E-05 | 2.927560106 |
| NUP54   | -0.308399196 | 4.51769818 | -4.624656689 | 5.96E-06 | 1.39E-05 | 2.924276547 |
| TSPEAR  | -0.501580233 | 1.05396654 | -4.624550924 | 5.96E-06 | 1.39E-05 | 2.923825365 |
| NPEPL1  | -0.345781074 | 2.51901066 | -4.623649739 | 5.98E-06 | 1.40E-05 | 2.919981335 |
| FUBP1   | -0.351136174 | 5.68105017 | -4.623605313 | 5.99E-06 | 1.40E-05 | 2.919791852 |
| TRPM4   | -0.284980702 | 4.08645254 | -4.62345059  | 5.99E-06 | 1.40E-05 | 2.919131949 |
| CRBN    | -0.26468101  | 4.251458   | -4.622151494 | 6.02E-06 | 1.41E-05 | 2.913591937 |
| RNH1    | -0.317579264 | 6.28700575 | -4.621979735 | 6.03E-06 | 1.41E-05 | 2.912859569 |
| ABCA5   | -0.337840928 | 2.71961136 | -4.621914763 | 6.03E-06 | 1.41E-05 | 2.912582536 |
| COL3A1  | 0.963289228  | 6.71510541 | 4.621653658  | 6.04E-06 | 1.41E-05 | 2.911469259 |
| DFFB    | -0.257973115 | 2.3463784  | -4.621346599 | 6.05E-06 | 1.41E-05 | 2.910160113 |
| PSG1    | 0.574041674  | 0.78448747 | 4.619937222  | 6.08E-06 | 1.42E-05 | 2.904152182 |
| ART5    | -0.386615809 | 0.92677175 | -4.619577613 | 6.09E-06 | 1.42E-05 | 2.902619479 |
| CHRD12  | 0.189091625  | 0.33376854 | 4.618710014  | 6.12E-06 | 1.43E-05 | 2.898922069 |
| GPR3    | -0.447474416 | 1.72201438 | -4.618259267 | 6.13E-06 | 1.43E-05 | 2.897001374 |
| FGFR4   | -0.214531385 | 0.60679248 | -4.618253491 | 6.13E-06 | 1.43E-05 | 2.896976761 |
| MAGEF1  | -0.325711909 | 7.26794986 | -4.615873549 | 6.19E-06 | 1.45E-05 | 2.886838125 |
| CHUK    | -0.296481064 | 3.32315223 | -4.615444098 | 6.21E-06 | 1.45E-05 | 2.885009118 |
| TTC8    | -0.359866237 | 4.12693463 | -4.614569215 | 6.23E-06 | 1.45E-05 | 2.881283491 |
| TGFBR1  | 0.584391539  | 5.19030233 | 4.61320116   | 6.27E-06 | 1.46E-05 | 2.875458918 |
| RAB38   | -0.428395838 | 4.52041002 | -4.612628177 | 6.28E-06 | 1.47E-05 | 2.87301985  |
| TMEM18  | -0.367117026 | 4.90153845 | -4.612554491 | 6.29E-06 | 1.47E-05 | 2.8727062   |
| CCSER1  | -0.20070155  | 0.58994397 | -4.612135018 | 6.30E-06 | 1.47E-05 | 2.870920777 |
| NAE1    | -0.291161824 | 4.84420213 | -4.611473504 | 6.32E-06 | 1.47E-05 | 2.868105417 |
| ELAVL2  | -0.108094319 | 0.25140164 | -4.610736748 | 6.34E-06 | 1.48E-05 | 2.864970235 |
| CXorf38 | -0.265847722 | 4.03588585 | -4.610702734 | 6.34E-06 | 1.48E-05 | 2.864825504 |
| CSTF2T  | -0.335860111 | 4.67064166 | -4.610582855 | 6.34E-06 | 1.48E-05 | 2.864315417 |
| MTSS1   | -0.525927158 | 3.31872488 | -4.608614928 | 6.40E-06 | 1.49E-05 | 2.855943447 |
| KIF25   | -0.058153179 | 0.10535521 | -4.608554094 | 6.40E-06 | 1.49E-05 | 2.855684693 |
| NKX2-3  | -0.471112641 | 0.57451356 | -4.607615467 | 6.43E-06 | 1.50E-05 | 2.851692688 |

|         |              |            |              |          |          |             |
|---------|--------------|------------|--------------|----------|----------|-------------|
| SOS2    | -0.357953089 | 4.59417426 | -4.607070356 | 6.44E-06 | 1.50E-05 | 2.849374633 |
| SRSF6   | -0.340728039 | 6.68118819 | -4.605818722 | 6.48E-06 | 1.51E-05 | 2.844053005 |
| HSPA12I | -0.536908569 | 2.77839477 | -4.605184498 | 6.50E-06 | 1.51E-05 | 2.841356914 |
| CLEC2B  | 0.460207111  | 3.36195289 | 4.60364161   | 6.54E-06 | 1.52E-05 | 2.834799398 |
| PUS1    | -0.229229159 | 3.22000607 | -4.603338316 | 6.55E-06 | 1.53E-05 | 2.83351057  |
| CD27    | -0.992679366 | 3.82409786 | -4.602928638 | 6.56E-06 | 1.53E-05 | 2.831769782 |
| IKZF1   | 0.510759357  | 1.43369686 | 4.601935834  | 6.59E-06 | 1.53E-05 | 2.827551743 |
| ANKRD5  | -0.429375347 | 1.78279854 | -4.600742468 | 6.63E-06 | 1.54E-05 | 2.822482619 |
| SMNDC1  | -0.273805938 | 4.09751417 | -4.600189421 | 6.64E-06 | 1.55E-05 | 2.820133788 |
| INSRR   | 0.072011011  | 0.06845481 | 4.600166453  | 6.64E-06 | 1.55E-05 | 2.820036244 |
| USP28   | -0.322251719 | 3.66797188 | -4.5998983   | 6.65E-06 | 1.55E-05 | 2.81889747  |
| CCDC22  | -0.282314147 | 5.11655586 | -4.599583174 | 6.66E-06 | 1.55E-05 | 2.817559287 |
| ARID3B  | -0.27470703  | 1.73701507 | -4.599314686 | 6.67E-06 | 1.55E-05 | 2.816419211 |
| SLC35B4 | -0.274105607 | 2.79775113 | -4.598335296 | 6.70E-06 | 1.56E-05 | 2.812260926 |
| TMEM52  | 0.194910536  | 0.51376754 | 4.597480423  | 6.72E-06 | 1.56E-05 | 2.808631931 |
| FYB1    | 0.616637572  | 2.21356319 | 4.597252996  | 6.73E-06 | 1.56E-05 | 2.80766658  |
| IL1RAPL | -0.171703476 | 0.12896344 | -4.596242286 | 6.76E-06 | 1.57E-05 | 2.803376962 |
| ASPDH   | -0.257627879 | 0.63949336 | -4.596138524 | 6.76E-06 | 1.57E-05 | 2.802936624 |
| NMUR1   | -0.222844443 | 0.6027104  | -4.595753217 | 6.77E-06 | 1.57E-05 | 2.801301559 |
| ICAM3   | 0.45237129   | 0.9987641  | 4.595510261  | 6.78E-06 | 1.58E-05 | 2.800270623 |
| DLL1    | -0.525432062 | 3.36662039 | -4.594728748 | 6.80E-06 | 1.58E-05 | 2.79695475  |
| GOLT1B  | -0.307517231 | 4.654386   | -4.594285113 | 6.82E-06 | 1.58E-05 | 2.795072666 |
| CCL28   | -0.414204646 | 3.94062057 | -4.593754164 | 6.83E-06 | 1.59E-05 | 2.792820362 |
| ZNF821  | -0.322511806 | 2.62018958 | -4.591766024 | 6.89E-06 | 1.60E-05 | 2.784388567 |
| PPP4R3I | -0.331312005 | 4.95944012 | -4.591566445 | 6.90E-06 | 1.60E-05 | 2.783542315 |
| TDRP    | -0.362803341 | 5.51822553 | -4.591218295 | 6.91E-06 | 1.60E-05 | 2.782066167 |
| MGP     | -0.596496509 | 7.85344315 | -4.590304859 | 6.94E-06 | 1.61E-05 | 2.778193669 |
| BIN2    | 0.525865454  | 2.03390983 | 4.589947984  | 6.95E-06 | 1.61E-05 | 2.776680882 |
| CDC27   | -0.358942997 | 5.3338653  | -4.589916733 | 6.95E-06 | 1.61E-05 | 2.776548415 |
| ZC3H7B  | -0.462776782 | 5.60385681 | -4.588234845 | 7.00E-06 | 1.63E-05 | 2.769420295 |
| WWC1    | -0.36216201  | 4.96503607 | -4.587936117 | 7.01E-06 | 1.63E-05 | 2.768154472 |
| TRPM7   | -0.356630681 | 3.47207197 | -4.587392664 | 7.03E-06 | 1.63E-05 | 2.765851826 |
| VAV1    | 0.546795959  | 2.08697696 | 4.586603282  | 7.05E-06 | 1.64E-05 | 2.762507582 |
| MBOAT1  | 0.52576244   | 3.64486266 | 4.586490534  | 7.06E-06 | 1.64E-05 | 2.762029958 |
| FXR1    | -0.26370545  | 4.98169311 | -4.586305452 | 7.06E-06 | 1.64E-05 | 2.761245938 |
| TMCC2   | -0.395642299 | 2.11861963 | -4.586065657 | 7.07E-06 | 1.64E-05 | 2.760230191 |
| FBXO7   | -0.36195996  | 6.1741535  | -4.584905082 | 7.11E-06 | 1.65E-05 | 2.755314745 |
| COPB1   | -0.374938779 | 6.35468433 | -4.584615082 | 7.12E-06 | 1.65E-05 | 2.75408666  |
| CTSS    | 0.589274914  | 6.24356561 | 4.583922651  | 7.14E-06 | 1.65E-05 | 2.751154627 |
| NOL9    | -0.275087999 | 3.18312211 | -4.583834237 | 7.14E-06 | 1.65E-05 | 2.750780274 |

|          |              |            |              |          |          |             |
|----------|--------------|------------|--------------|----------|----------|-------------|
| RPL37A   | -0.343991202 | 8.34866569 | -4.583727672 | 7.14E-06 | 1.66E-05 | 2.750329077 |
| ZNF33B   | -0.313972907 | 3.99224692 | -4.583537892 | 7.15E-06 | 1.66E-05 | 2.749525568 |
| B3GNTL   | -0.200067203 | 1.66066879 | -4.58223525  | 7.19E-06 | 1.67E-05 | 2.744011066 |
| ADHFE1   | -0.330123015 | 2.76370413 | -4.582215937 | 7.19E-06 | 1.67E-05 | 2.743929319 |
| GJD3     | -0.274357547 | 0.3252665  | -4.581983183 | 7.20E-06 | 1.67E-05 | 2.742944143 |
| KCNJ14   | -0.231789959 | 1.10462808 | -4.581150077 | 7.23E-06 | 1.67E-05 | 2.7394182   |
| SLC9A9   | -0.380833837 | 1.97024653 | -4.578555787 | 7.31E-06 | 1.69E-05 | 2.728441908 |
| EYA3     | -0.310334794 | 3.9530012  | -4.577024716 | 7.36E-06 | 1.70E-05 | 2.721966508 |
| ASPHD2   | 0.485567021  | 2.07864535 | 4.576909606  | 7.36E-06 | 1.70E-05 | 2.721479747 |
| COG6     | -0.354325887 | 3.57851977 | -4.576787991 | 7.37E-06 | 1.70E-05 | 2.720965487 |
| LANCL1   | -0.36054413  | 4.67651893 | -4.575550694 | 7.41E-06 | 1.71E-05 | 2.715734124 |
| GBX2     | 0.311852201  | 0.31524644 | 4.574394398  | 7.44E-06 | 1.72E-05 | 2.710846324 |
| CYTH2    | -0.295851976 | 5.24077197 | -4.573545068 | 7.47E-06 | 1.73E-05 | 2.707256774 |
| STPG2    | -0.079583848 | 0.23008191 | -4.573195169 | 7.48E-06 | 1.73E-05 | 2.705778149 |
| CLRN3    | 0.239463077  | 0.48675377 | 4.572648886  | 7.50E-06 | 1.73E-05 | 2.703469824 |
| FAM111A  | 0.434671421  | 4.53843737 | 4.571737102  | 7.53E-06 | 1.74E-05 | 2.699617591 |
| HP1BP3   | -0.347035571 | 6.21418775 | -4.570453163 | 7.57E-06 | 1.75E-05 | 2.694194134 |
| NR2E1    | -0.249013129 | 0.15949307 | -4.570115709 | 7.59E-06 | 1.75E-05 | 2.692768917 |
| CTSK     | 0.715013435  | 4.79258036 | 4.569892104  | 7.59E-06 | 1.76E-05 | 2.69182458  |
| MAP1LC3  | -0.270997755 | 6.0050754  | -4.568750614 | 7.63E-06 | 1.76E-05 | 2.687004424 |
| KRT78    | -0.457362494 | 0.66594485 | -4.568743159 | 7.63E-06 | 1.76E-05 | 2.686972951 |
| TEF      | -0.477230589 | 5.77401135 | -4.56837866  | 7.64E-06 | 1.77E-05 | 2.685434003 |
| ENTPD2   | 0.775978979  | 2.0423092  | 4.567969366  | 7.66E-06 | 1.77E-05 | 2.683706047 |
| NFKBIA   | -0.416436549 | 6.87402955 | -4.566693851 | 7.70E-06 | 1.78E-05 | 2.678321937 |
| FST      | 0.456331123  | 0.96189769 | 4.566628101  | 7.70E-06 | 1.78E-05 | 2.678044433 |
| NPM2     | -0.510762703 | 4.9033696  | -4.565960006 | 7.73E-06 | 1.78E-05 | 2.675224863 |
| MYH15    | -0.096545096 | 0.1184402  | -4.565946123 | 7.73E-06 | 1.78E-05 | 2.675166275 |
| PCP4L1   | -0.688213125 | 1.49994382 | -4.565786501 | 7.73E-06 | 1.79E-05 | 2.674492675 |
| SEPTIN7  | -0.303057519 | 5.15954778 | -4.565243224 | 7.75E-06 | 1.79E-05 | 2.672200209 |
| EMP3     | 0.554812375  | 6.25270706 | 4.564817832  | 7.77E-06 | 1.79E-05 | 2.670405345 |
| CHMP4A   | -0.281377929 | 2.51398218 | -4.563440853 | 7.81E-06 | 1.80E-05 | 2.6645964   |
| MFSD4A   | 0.459433759  | 1.92331488 | 4.56338435   | 7.81E-06 | 1.80E-05 | 2.664358067 |
| PCBP1    | -0.43495565  | 8.04876235 | -4.563073877 | 7.83E-06 | 1.81E-05 | 2.663048521 |
| MS4A15   | 0.254560622  | 0.24695753 | 4.562259532  | 7.85E-06 | 1.81E-05 | 2.659614049 |
| CDKN2A   | -0.346151872 | 4.49479847 | -4.562237487 | 7.85E-06 | 1.81E-05 | 2.659521078 |
| TUBE1    | -0.35769499  | 2.80939483 | -4.562092201 | 7.86E-06 | 1.81E-05 | 2.658908398 |
| C10orf82 | -0.57966968  | 1.50127358 | -4.562048393 | 7.86E-06 | 1.81E-05 | 2.658723658 |
| ZNF618   | -0.385758536 | 3.19516245 | -4.56157894  | 7.88E-06 | 1.82E-05 | 2.656744071 |
| PCMTD2   | -0.358071596 | 4.93420565 | -4.561199188 | 7.89E-06 | 1.82E-05 | 2.655142862 |
| PDE11A   | -0.296120986 | 0.62291453 | -4.560795688 | 7.90E-06 | 1.82E-05 | 2.653441642 |

|         |              |            |              |          |          |             |
|---------|--------------|------------|--------------|----------|----------|-------------|
| TMPRSS  | 0.099637862  | 0.1066341  | 4.559698443  | 7.94E-06 | 1.83E-05 | 2.648816132 |
| PSMD2   | -0.311519448 | 6.46599876 | -4.559562383 | 7.95E-06 | 1.83E-05 | 2.648242627 |
| MFAP2   | 0.874546104  | 3.49443195 | 4.559420794  | 7.95E-06 | 1.83E-05 | 2.647645835 |
| ERGIC1  | -0.330972798 | 5.62527945 | -4.556968086 | 8.04E-06 | 1.85E-05 | 2.637310231 |
| CARNMT  | -0.335002129 | 4.30974172 | -4.555859032 | 8.08E-06 | 1.86E-05 | 2.632638278 |
| CABP1   | -0.168070517 | 0.4333603  | -4.554958689 | 8.11E-06 | 1.87E-05 | 2.628846241 |
| MMP10   | 0.274709706  | 0.30412864 | 4.55421948   | 8.14E-06 | 1.87E-05 | 2.625733337 |
| ZC3H12/ | 0.495075414  | 2.82722423 | 4.553632931  | 8.16E-06 | 1.88E-05 | 2.623263613 |
| FAM131C | -0.276703744 | 0.96949032 | -4.553191572 | 8.17E-06 | 1.88E-05 | 2.621405401 |
| TDRD3   | -0.230394056 | 3.51187511 | -4.552995762 | 8.18E-06 | 1.88E-05 | 2.620581053 |
| RBM10   | -0.256694582 | 6.04243601 | -4.55245818  | 8.20E-06 | 1.89E-05 | 2.618318012 |
| ZNF200  | -0.221260409 | 2.00920701 | -4.552066607 | 8.21E-06 | 1.89E-05 | 2.616669766 |
| NHSL2   | 0.530001999  | 2.0986099  | 4.552042413  | 8.21E-06 | 1.89E-05 | 2.616567931 |
| SNX14   | -0.302393347 | 5.04358327 | -4.552040843 | 8.21E-06 | 1.89E-05 | 2.616561322 |
| DCAF6   | -0.31144618  | 4.95827371 | -4.551329377 | 8.24E-06 | 1.90E-05 | 2.613566876 |
| ZNF502  | -0.319961085 | 3.18501262 | -4.550572117 | 8.27E-06 | 1.90E-05 | 2.610380122 |
| LRR8C   | -0.324563139 | 2.27616544 | -4.550283126 | 8.28E-06 | 1.90E-05 | 2.609164089 |
| NIPA2   | -0.450631821 | 4.53055498 | -4.550040775 | 8.29E-06 | 1.91E-05 | 2.608144362 |
| FLOT1   | -0.248277985 | 7.73348258 | -4.54964843  | 8.30E-06 | 1.91E-05 | 2.606493612 |
| ALKBH8  | -0.285739473 | 3.02162411 | -4.548477    | 8.34E-06 | 1.92E-05 | 2.601565662 |
| NAT14   | -0.465109594 | 5.1016973  | -4.547109913 | 8.39E-06 | 1.93E-05 | 2.595815985 |
| KIF26A  | -0.348451274 | 1.47599368 | -4.546440799 | 8.42E-06 | 1.93E-05 | 2.593002373 |
| FAM210E | -0.247995437 | 5.88984115 | -4.546057947 | 8.43E-06 | 1.94E-05 | 2.591392642 |
| SIGIRR  | -0.357997192 | 5.03205749 | -4.545192821 | 8.47E-06 | 1.94E-05 | 2.587755584 |
| CBLN1   | 1.116140847  | 3.13144099 | 4.545087768  | 8.47E-06 | 1.95E-05 | 2.587313973 |
| KLHDC4  | -0.2428197   | 3.26818157 | -4.544975445 | 8.47E-06 | 1.95E-05 | 2.586841812 |
| NAPSA   | 0.870180946  | 2.38077377 | 4.544001553  | 8.51E-06 | 1.95E-05 | 2.582748361 |
| MAMDC4  | -0.396294239 | 2.8005578  | -4.543657729 | 8.52E-06 | 1.96E-05 | 2.581303384 |
| CCDC17  | -0.290503909 | 1.04785299 | -4.542816082 | 8.55E-06 | 1.96E-05 | 2.577766613 |
| SLC41A2 | -0.385836581 | 3.62324891 | -4.542166459 | 8.58E-06 | 1.97E-05 | 2.575037145 |
| LAIR1   | 0.514253767  | 2.17615148 | 4.542138824  | 8.58E-06 | 1.97E-05 | 2.574921038 |
| BID     | 0.491579765  | 4.33893431 | 4.541887187  | 8.59E-06 | 1.97E-05 | 2.573863853 |
| SERINC1 | -0.409645727 | 8.2408568  | -4.541708913 | 8.60E-06 | 1.97E-05 | 2.57311491  |
| SLC30A6 | -0.352357938 | 4.19055853 | -4.541687554 | 8.60E-06 | 1.97E-05 | 2.573025183 |
| MUC3A   | -0.248280188 | 0.63025749 | -4.541376018 | 8.61E-06 | 1.97E-05 | 2.571716465 |
| AZU1    | 0.358210078  | 0.46728043 | 4.541212066  | 8.62E-06 | 1.98E-05 | 2.571027752 |
| TMEM10  | -0.292495556 | 3.32910331 | -4.540690949 | 8.63E-06 | 1.98E-05 | 2.568838852 |
| C2orf49 | -0.309771566 | 3.75119116 | -4.540555442 | 8.64E-06 | 1.98E-05 | 2.568269702 |
| TENT5C  | -0.491762595 | 4.46741596 | -4.539457286 | 8.68E-06 | 1.99E-05 | 2.563657817 |
| RPL9    | -0.3283833   | 8.68295226 | -4.539325383 | 8.69E-06 | 1.99E-05 | 2.563103935 |

|         |              |            |              |          |          |             |
|---------|--------------|------------|--------------|----------|----------|-------------|
| BICRA   | -0.267352929 | 2.78779176 | -4.538911047 | 8.70E-06 | 1.99E-05 | 2.561364152 |
| FBXW2   | -0.318695659 | 4.20019853 | -4.538489321 | 8.72E-06 | 2.00E-05 | 2.559593478 |
| RELL2   | -0.304194594 | 1.62667562 | -4.538209487 | 8.73E-06 | 2.00E-05 | 2.558418636 |
| UBP1    | -0.313736606 | 4.51743718 | -4.5377729   | 8.75E-06 | 2.00E-05 | 2.556585813 |
| SP6     | -0.442234737 | 1.07538673 | -4.537460459 | 8.76E-06 | 2.01E-05 | 2.555274253 |
| ZW10    | -0.300220525 | 3.7830815  | -4.536192354 | 8.81E-06 | 2.02E-05 | 2.549951812 |
| WDR91   | -0.290675797 | 2.9843696  | -4.536079881 | 8.81E-06 | 2.02E-05 | 2.549479805 |
| JCHAIN  | 1.659125638  | 4.65271583 | 4.535516593  | 8.83E-06 | 2.02E-05 | 2.547116051 |
| PRPF18  | -0.287334654 | 4.48826707 | -4.534835034 | 8.86E-06 | 2.03E-05 | 2.544256328 |
| USP10   | -0.325903321 | 5.30611758 | -4.534805428 | 8.86E-06 | 2.03E-05 | 2.544132111 |
| ELOVL7  | 0.547195279  | 4.59446393 | 4.534491651  | 8.87E-06 | 2.03E-05 | 2.542815677 |
| UGCG    | 0.366837845  | 4.16325081 | 4.532228564  | 8.96E-06 | 2.05E-05 | 2.533323313 |
| F10     | -0.371674796 | 1.1771959  | -4.532123847 | 8.97E-06 | 2.05E-05 | 2.532884185 |
| ZNF250  | -0.304237796 | 3.27099536 | -4.531685295 | 8.98E-06 | 2.06E-05 | 2.531045209 |
| BICDL1  | -0.47143523  | 3.58840749 | -4.531367302 | 9.00E-06 | 2.06E-05 | 2.529711871 |
| CIDEB   | -0.151391697 | 0.46226326 | -4.531254279 | 9.00E-06 | 2.06E-05 | 2.529237985 |
| ACSM1   | -0.333724576 | 1.48165776 | -4.531252313 | 9.00E-06 | 2.06E-05 | 2.52922974  |
| CCNY    | -0.284205056 | 5.64184911 | -4.531053286 | 9.01E-06 | 2.06E-05 | 2.528395285 |
| SRGAP3  | 0.353303028  | 2.11023225 | 4.530467491  | 9.03E-06 | 2.06E-05 | 2.525939404 |
| NUCKS1  | -0.305346466 | 7.5356156  | -4.529768359 | 9.06E-06 | 2.07E-05 | 2.52300873  |
| FRS3    | -0.283310487 | 3.38173885 | -4.528999191 | 9.09E-06 | 2.08E-05 | 2.519784915 |
| ATP6V1C | -0.302189112 | 5.39531539 | -4.528855807 | 9.09E-06 | 2.08E-05 | 2.519184    |
| MAK     | -0.196941717 | 0.71532035 | -4.528618464 | 9.10E-06 | 2.08E-05 | 2.518189345 |
| CUL4A   | -0.303540018 | 4.90476001 | -4.528525405 | 9.11E-06 | 2.08E-05 | 2.517799369 |
| FTO     | -0.321220437 | 3.65683133 | -4.528334142 | 9.12E-06 | 2.08E-05 | 2.51699787  |
| LTBP2   | 0.56729183   | 6.59485604 | 4.52715843   | 9.16E-06 | 2.09E-05 | 2.512071623 |
| FOXA3   | 0.310990828  | 0.39664165 | 4.526434117  | 9.19E-06 | 2.10E-05 | 2.509037285 |
| SPPL2A  | -0.31483293  | 4.36316467 | -4.526348581 | 9.20E-06 | 2.10E-05 | 2.50867898  |
| ARMC1   | -0.252293758 | 4.609368   | -4.524917959 | 9.25E-06 | 2.11E-05 | 2.502687043 |
| STAM    | 0.440084678  | 4.91001661 | 4.524612353  | 9.27E-06 | 2.12E-05 | 2.501407268 |
| VIPAS39 | -0.2550384   | 4.43083075 | -4.524070045 | 9.29E-06 | 2.12E-05 | 2.499136444 |
| F2RL3   | -0.727682878 | 3.41358264 | -4.523321176 | 9.32E-06 | 2.13E-05 | 2.496001066 |
| TAP1    | 0.55658148   | 5.28479956 | 4.522785425  | 9.34E-06 | 2.13E-05 | 2.493758243 |
| EXOC2   | -0.308479255 | 4.51815353 | -4.522016227 | 9.37E-06 | 2.14E-05 | 2.490538536 |
| DUS3L   | -0.27235656  | 4.06561855 | -4.520792733 | 9.42E-06 | 2.15E-05 | 2.485418197 |
| ZNHIT6  | -0.286213584 | 3.5203093  | -4.520758742 | 9.42E-06 | 2.15E-05 | 2.485275961 |
| CCDC69  | -0.539492138 | 3.64526964 | -4.520427569 | 9.44E-06 | 2.15E-05 | 2.48389021  |
| TRIM37  | -0.348857187 | 3.91680392 | -4.519060203 | 9.49E-06 | 2.17E-05 | 2.478169555 |
| TNFRSF  | 0.447458252  | 2.19569314 | 4.518905758  | 9.50E-06 | 2.17E-05 | 2.477523495 |
| RUNDC3  | -0.226640695 | 1.02647042 | -4.518789615 | 9.50E-06 | 2.17E-05 | 2.477037667 |

|         |              |            |              |          |          |             |
|---------|--------------|------------|--------------|----------|----------|-------------|
| TRIM47  | 0.375994343  | 5.16006064 | 4.518662096  | 9.51E-06 | 2.17E-05 | 2.476504269 |
| LRRFIP1 | -0.295291409 | 4.80014634 | -4.517678985 | 9.55E-06 | 2.18E-05 | 2.472392441 |
| MKRN1   | -0.260631316 | 6.00391547 | -4.516774819 | 9.59E-06 | 2.19E-05 | 2.468611474 |
| LANCL3  | -0.205058435 | 0.46598001 | -4.516623291 | 9.59E-06 | 2.19E-05 | 2.46797789  |
| SF1     | -0.296421427 | 6.79968535 | -4.516419904 | 9.60E-06 | 2.19E-05 | 2.467127496 |
| ZNF793  | -0.280750748 | 1.85414755 | -4.516359994 | 9.61E-06 | 2.19E-05 | 2.466877005 |
| ENTPD6  | -0.24997049  | 5.01750479 | -4.516306964 | 9.61E-06 | 2.19E-05 | 2.466655286 |
| CASC3   | -0.331839228 | 5.72356132 | -4.515931101 | 9.62E-06 | 2.19E-05 | 2.465083863 |
| ZNF585E | -0.268374981 | 3.2105468  | -4.515618809 | 9.64E-06 | 2.19E-05 | 2.463778303 |
| GET4    | -0.20972143  | 1.49036084 | -4.515500559 | 9.64E-06 | 2.20E-05 | 2.463283968 |
| ATXN7L1 | -0.248249732 | 1.98880261 | -4.514707142 | 9.68E-06 | 2.20E-05 | 2.459967448 |
| LATS2   | -0.417188009 | 4.36228066 | -4.514159426 | 9.70E-06 | 2.21E-05 | 2.45767826  |
| TXK     | 0.270559881  | 0.92293836 | 4.513860528  | 9.71E-06 | 2.21E-05 | 2.456429113 |
| OGG1    | -0.297591707 | 3.29216818 | -4.513762942 | 9.72E-06 | 2.21E-05 | 2.456021296 |
| RGS3    | -0.34087807  | 4.03067652 | -4.5132436   | 9.74E-06 | 2.22E-05 | 2.453851081 |
| OLFM4   | -0.383897878 | 0.39158432 | -4.511821285 | 9.80E-06 | 2.23E-05 | 2.447908621 |
| ASPG    | -0.247108701 | 0.476451   | -4.511716325 | 9.80E-06 | 2.23E-05 | 2.447470162 |
| APOL2   | 0.423273616  | 4.94408142 | 4.511299457  | 9.82E-06 | 2.23E-05 | 2.445728817 |
| GLS2    | 0.281392523  | 1.03297361 | 4.511174745  | 9.83E-06 | 2.23E-05 | 2.445207896 |
| ANAPC4  | -0.256056982 | 3.39352649 | -4.510409414 | 9.86E-06 | 2.24E-05 | 2.44201138  |
| EFTUD2  | -0.259941386 | 4.63540017 | -4.510166552 | 9.87E-06 | 2.24E-05 | 2.440997126 |
| QTRT2   | -0.294072789 | 2.91603305 | -4.509892028 | 9.88E-06 | 2.25E-05 | 2.439850704 |
| DYSF    | -0.444719023 | 4.27115288 | -4.509701776 | 9.89E-06 | 2.25E-05 | 2.439056238 |
| ST13    | -0.349856879 | 7.60598839 | -4.50861799  | 9.94E-06 | 2.26E-05 | 2.434531047 |
| SPP1    | 1.094543623  | 4.91197946 | 4.508606321  | 9.94E-06 | 2.26E-05 | 2.434482329 |
| SMG7    | -0.260166487 | 5.04387428 | -4.508451209 | 9.94E-06 | 2.26E-05 | 2.433834758 |
| LRRC56  | -0.463602973 | 2.65129221 | -4.508377515 | 9.95E-06 | 2.26E-05 | 2.433527103 |
| KCNJ16  | -0.564913454 | 7.68850619 | -4.508309601 | 9.95E-06 | 2.26E-05 | 2.433243582 |
| UTP23   | -0.322132065 | 3.45836451 | -4.507681392 | 9.98E-06 | 2.27E-05 | 2.430621164 |
| PKDCC   | -0.435269214 | 1.55287419 | -4.507672648 | 9.98E-06 | 2.27E-05 | 2.430584664 |
| TMEM88  | 0.337068215  | 0.48017494 | 4.507489531  | 9.99E-06 | 2.27E-05 | 2.429820315 |
| SH2D2A  | 0.487742681  | 1.34700991 | 4.506941455  | 1.00E-05 | 2.27E-05 | 2.427532743 |
| WNT2    | 0.267866978  | 0.32050256 | 4.506676339  | 1.00E-05 | 2.27E-05 | 2.426426278 |
| BTNL3   | -0.103646518 | 0.11519204 | -4.505016066 | 1.01E-05 | 2.29E-05 | 2.419498392 |
| TMEM25  | -0.308312826 | 4.36195172 | -4.504485487 | 1.01E-05 | 2.30E-05 | 2.417284882 |
| KIF3B   | -0.32180412  | 5.12629306 | -4.503560744 | 1.02E-05 | 2.30E-05 | 2.413427498 |
| TMEM16  | -0.29796823  | 2.50507507 | -4.503286006 | 1.02E-05 | 2.31E-05 | 2.412281616 |
| WDR7    | -0.28466156  | 2.74705529 | -4.503021155 | 1.02E-05 | 2.31E-05 | 2.411177022 |
| EIF3G   | -0.304949702 | 7.00705621 | -4.501153578 | 1.03E-05 | 2.33E-05 | 2.403389654 |
| GRAMD2  | -0.543826549 | 2.01114495 | -4.499648961 | 1.03E-05 | 2.34E-05 | 2.397117745 |

|         |              |            |              |          |          |             |
|---------|--------------|------------|--------------|----------|----------|-------------|
| GLB1L2  | -0.474139999 | 4.38265727 | -4.499243647 | 1.04E-05 | 2.35E-05 | 2.395428524 |
| TWSG1   | -0.420975867 | 5.6137259  | -4.498090595 | 1.04E-05 | 2.36E-05 | 2.390623673 |
| CCR2    | 0.530246705  | 1.54988979 | 4.497330436  | 1.04E-05 | 2.37E-05 | 2.387456613 |
| NECTIN2 | -0.341040326 | 6.5283304  | -4.49685923  | 1.05E-05 | 2.37E-05 | 2.38549365  |
| CHIT1   | 1.000706481  | 2.5212812  | 4.494269395  | 1.06E-05 | 2.40E-05 | 2.374707974 |
| RANGRF  | -0.344410858 | 4.61049509 | -4.49341821  | 1.06E-05 | 2.41E-05 | 2.37116427  |
| LAMP1   | -0.316389327 | 7.75354882 | -4.49282388  | 1.06E-05 | 2.41E-05 | 2.368690262 |
| NCAPH2  | -0.269386012 | 5.22771732 | -4.491194634 | 1.07E-05 | 2.43E-05 | 2.361909649 |
| C5orf22 | -0.279263788 | 3.82778816 | -4.491090146 | 1.07E-05 | 2.43E-05 | 2.361474862 |
| SEC23IP | -0.337608512 | 4.23875549 | -4.491066671 | 1.07E-05 | 2.43E-05 | 2.361377181 |
| PTCH2   | -0.312494858 | 1.211255   | -4.490767496 | 1.07E-05 | 2.43E-05 | 2.360132332 |
| SERTAD  | -0.30462618  | 5.48613611 | -4.489998986 | 1.08E-05 | 2.44E-05 | 2.356934929 |
| CDK1    | -0.336721143 | 2.32417295 | -4.4896916   | 1.08E-05 | 2.44E-05 | 2.35565617  |
| GPR158  | -0.28863969  | 0.3835639  | -4.488785221 | 1.08E-05 | 2.45E-05 | 2.351885982 |
| JPH3    | 0.319800018  | 0.44369079 | 4.488275122  | 1.09E-05 | 2.46E-05 | 2.349764451 |
| RASGRF  | 0.201918196  | 0.76366598 | 4.487422204  | 1.09E-05 | 2.47E-05 | 2.346217575 |
| PFKP    | -0.420021106 | 6.43096203 | -4.486450044 | 1.09E-05 | 2.48E-05 | 2.342175532 |
| ZFP69B  | 0.337880598  | 1.64505147 | 4.486386444  | 1.09E-05 | 2.48E-05 | 2.34191112  |
| NCOA7   | 0.583689935  | 4.0302985  | 4.486109443  | 1.10E-05 | 2.48E-05 | 2.340759559 |
| EHMT1   | -0.302007083 | 3.55091481 | -4.485159173 | 1.10E-05 | 2.49E-05 | 2.336809507 |
| TBL3    | -0.23213094  | 4.4093423  | -4.484471443 | 1.10E-05 | 2.50E-05 | 2.33395122  |
| CCDC12  | -0.262397464 | 2.07440059 | -4.483988334 | 1.11E-05 | 2.50E-05 | 2.331943584 |
| PIP4P1  | -0.26045357  | 4.85287111 | -4.483481798 | 1.11E-05 | 2.51E-05 | 2.329838795 |
| TMEM13  | -0.816792745 | 2.28890655 | -4.483087617 | 1.11E-05 | 2.51E-05 | 2.328201009 |
| HOXD1   | 0.378352759  | 0.47923847 | 4.479899857  | 1.13E-05 | 2.54E-05 | 2.31496068  |
| FOXN3   | 0.35070625   | 3.26998118 | 4.479122268  | 1.13E-05 | 2.55E-05 | 2.311732192 |
| SLC35C2 | -0.263160028 | 5.07808428 | -4.478155074 | 1.13E-05 | 2.56E-05 | 2.307717144 |
| GPR107  | -0.383332806 | 5.59415806 | -4.477274282 | 1.14E-05 | 2.57E-05 | 2.304061419 |
| FUS     | -0.322171252 | 6.39246349 | -4.476638853 | 1.14E-05 | 2.58E-05 | 2.301424454 |
| CORO1A  | 0.675653803  | 4.14989977 | 4.476282632  | 1.14E-05 | 2.58E-05 | 2.299946313 |
| PDK4    | -0.994352157 | 7.03930962 | -4.47558699  | 1.15E-05 | 2.59E-05 | 2.29706003  |
| CHD7    | -0.324608781 | 2.31761028 | -4.475250959 | 1.15E-05 | 2.59E-05 | 2.295665946 |
| MIF     | -0.369809795 | 6.81841145 | -4.474932903 | 1.15E-05 | 2.60E-05 | 2.294346515 |
| VIM     | -0.352416889 | 10.3069124 | -4.474557002 | 1.15E-05 | 2.60E-05 | 2.292787221 |
| RPL29   | -0.284898462 | 9.65919611 | -4.474279549 | 1.15E-05 | 2.60E-05 | 2.291636378 |
| MOB1B   | -0.307351191 | 3.86356486 | -4.474105281 | 1.15E-05 | 2.61E-05 | 2.290913565 |
| P2RY4   | 0.150617225  | 0.30790139 | 4.474038296  | 1.15E-05 | 2.61E-05 | 2.290635739 |
| GCNT3   | -0.461535029 | 0.95206679 | -4.473958966 | 1.16E-05 | 2.61E-05 | 2.29030671  |
| SIN3A   | -0.333468403 | 4.4223066  | -4.473866383 | 1.16E-05 | 2.61E-05 | 2.289922726 |
| CLHC1   | -0.301155916 | 1.90397263 | -4.473857445 | 1.16E-05 | 2.61E-05 | 2.289885655 |



|          |              |            |              |          |          |             |
|----------|--------------|------------|--------------|----------|----------|-------------|
| NRP2     | 0.695225251  | 4.73021989 | 4.473307269  | 1.16E-05 | 2.61E-05 | 2.287603953 |
| AQP3     | 0.577071456  | 1.76431809 | 4.472408418  | 1.16E-05 | 2.62E-05 | 2.283876729 |
| GMFG     | -0.447737055 | 4.84785229 | -4.471961143 | 1.17E-05 | 2.63E-05 | 2.282022274 |
| NXT2     | -0.273385818 | 3.3284538  | -4.471904882 | 1.17E-05 | 2.63E-05 | 2.281789021 |
| C11orf45 | -0.264315645 | 1.68558839 | -4.471315851 | 1.17E-05 | 2.63E-05 | 2.279347093 |
| TRUB1    | -0.373934029 | 4.26597413 | -4.471151788 | 1.17E-05 | 2.64E-05 | 2.278666993 |
| GPR182   | -0.137074518 | 0.20647666 | -4.470912994 | 1.17E-05 | 2.64E-05 | 2.277677144 |
| ANPEP    | 0.577158859  | 2.61588278 | 4.470598118  | 1.17E-05 | 2.64E-05 | 2.276371985 |
| SEL1L    | -0.42468576  | 5.2728482  | -4.470149766 | 1.17E-05 | 2.65E-05 | 2.274513709 |
| CCSAP    | 0.274559131  | 2.22226804 | 4.470061378  | 1.18E-05 | 2.65E-05 | 2.274147389 |
| ATF6B    | -0.328697663 | 6.6058582  | -4.469896505 | 1.18E-05 | 2.65E-05 | 2.273464093 |
| USP51    | -0.345191774 | 2.92353659 | -4.468502312 | 1.18E-05 | 2.66E-05 | 2.2676869   |
| ZNF777   | -0.252082527 | 4.47792984 | -4.467649923 | 1.19E-05 | 2.67E-05 | 2.264155571 |
| PCNP     | -0.33040093  | 7.03292316 | -4.466840262 | 1.19E-05 | 2.68E-05 | 2.260801787 |
| NCDN     | -0.352461553 | 5.18721127 | -4.46635764  | 1.19E-05 | 2.69E-05 | 2.258802915 |
| BCL2L2-I | -0.111476917 | 0.33635841 | -4.465068378 | 1.20E-05 | 2.70E-05 | 2.253464094 |
| EYA1     | -0.120535064 | 0.16984191 | -4.46499284  | 1.20E-05 | 2.70E-05 | 2.253151332 |
| COL4A2   | -0.485911802 | 6.99742304 | -4.464943806 | 1.20E-05 | 2.70E-05 | 2.252948312 |
| CIAO1    | -0.286901054 | 5.78748519 | -4.464834479 | 1.20E-05 | 2.70E-05 | 2.252495662 |
| APEX2    | -0.230193672 | 4.49240081 | -4.464827424 | 1.20E-05 | 2.70E-05 | 2.252466454 |
| ERI2     | -0.276802    | 2.31173837 | -4.464569461 | 1.20E-05 | 2.71E-05 | 2.251398436 |
| FKBP7    | -0.328644339 | 3.1972807  | -4.463948084 | 1.21E-05 | 2.71E-05 | 2.24882604  |
| ZNF853   | -0.372378636 | 4.14579288 | -4.4627536   | 1.21E-05 | 2.73E-05 | 2.24388193  |
| FERMT3   | 0.588581275  | 3.57402435 | 4.462404339  | 1.21E-05 | 2.73E-05 | 2.242436511 |
| TOB1     | -0.543646831 | 5.96023402 | -4.461616331 | 1.22E-05 | 2.74E-05 | 2.239175692 |
| MOCS3    | -0.256181175 | 2.97678995 | -4.460791239 | 1.22E-05 | 2.75E-05 | 2.235761942 |
| XKRX     | 0.81271591   | 2.50101464 | 4.460778336  | 1.22E-05 | 2.75E-05 | 2.235708563 |
| TOMM20   | -0.319231347 | 8.03009422 | -4.45906177  | 1.23E-05 | 2.77E-05 | 2.228608164 |
| ZNF101   | -0.23466804  | 2.38037286 | -4.458432337 | 1.24E-05 | 2.78E-05 | 2.226005167 |
| VGLL3    | 0.318551847  | 0.69918484 | 4.457085861  | 1.24E-05 | 2.79E-05 | 2.220437916 |
| COL6A3   | 0.730549408  | 3.83422478 | 4.455613139  | 1.25E-05 | 2.81E-05 | 2.214350328 |
| KCNH1    | 0.069251269  | 0.13077577 | 4.455522812  | 1.25E-05 | 2.81E-05 | 2.213977011 |
| G0S2     | 1.007584872  | 4.82365102 | 4.455233692  | 1.25E-05 | 2.81E-05 | 2.212782139 |
| MAF      | -0.37993138  | 5.08866082 | -4.454548908 | 1.26E-05 | 2.82E-05 | 2.209952332 |
| LIN52    | -0.22844     | 3.13790735 | -4.454348465 | 1.26E-05 | 2.82E-05 | 2.209124089 |
| TP63     | 0.518105859  | 0.88839448 | 4.453768645  | 1.26E-05 | 2.83E-05 | 2.206728424 |
| MAP3K8   | -0.337732225 | 2.67206653 | -4.453762888 | 1.26E-05 | 2.83E-05 | 2.206704636 |
| RAB39B   | -0.436931725 | 2.36657596 | -4.452834153 | 1.27E-05 | 2.84E-05 | 2.2028679   |
| PIK3C3   | -0.277860312 | 3.05299531 | -4.452730259 | 1.27E-05 | 2.84E-05 | 2.202438743 |
| SHC3     | 0.483325907  | 1.86137052 | 4.452679983  | 1.27E-05 | 2.84E-05 | 2.202231067 |

|        |              |            |              |          |          |             |
|--------|--------------|------------|--------------|----------|----------|-------------|
| CCR6   | 0.082445402  | 0.10963575 | 4.45045388   | 1.28E-05 | 2.87E-05 | 2.193037782 |
| DHCR7  | -0.391256221 | 4.95198146 | -4.450065057 | 1.28E-05 | 2.87E-05 | 2.191432438 |
| GNLY   | 0.818200008  | 2.86114891 | 4.44951152   | 1.28E-05 | 2.88E-05 | 2.189147239 |
| FAM83A | 0.600488154  | 1.16721261 | 4.448578314  | 1.29E-05 | 2.89E-05 | 2.185295184 |
| CAPN8  | 0.336093323  | 0.61448565 | 4.447991494  | 1.29E-05 | 2.90E-05 | 2.182873282 |
| TRIL   | -0.456368594 | 3.53510754 | -4.447429895 | 1.30E-05 | 2.91E-05 | 2.18055573  |
| PSG4   | 0.283466117  | 0.21895269 | 4.447298629  | 1.30E-05 | 2.91E-05 | 2.18001407  |
| RPGR   | -0.278479624 | 2.15807451 | -4.447117299 | 1.30E-05 | 2.91E-05 | 2.179265848 |
| ANXA3  | 0.755834222  | 5.13353523 | 4.446230676  | 1.30E-05 | 2.92E-05 | 2.175607744 |
| CCDC88 | 0.466221786  | 2.12394472 | 4.445821891  | 1.31E-05 | 2.92E-05 | 2.173921358 |
| PLIN1  | -0.353678249 | 0.77009301 | -4.44549657  | 1.31E-05 | 2.93E-05 | 2.172579384 |
| VCX3B  | -0.084278978 | 0.13638968 | -4.445146834 | 1.31E-05 | 2.93E-05 | 2.171136791 |
| WEE2   | -0.062183191 | 0.13551128 | -4.444647147 | 1.31E-05 | 2.94E-05 | 2.169075843 |
| AGPS   | -0.313037888 | 3.73559831 | -4.443263962 | 1.32E-05 | 2.96E-05 | 2.163371973 |
| ZNF431 | 0.465322305  | 3.34935992 | 4.442441555  | 1.32E-05 | 2.97E-05 | 2.159981319 |
| SPAG1  | -0.320285086 | 2.18103331 | -4.442371369 | 1.32E-05 | 2.97E-05 | 2.159691975 |
| ZNF772 | -0.359858812 | 3.26562302 | -4.442132908 | 1.33E-05 | 2.97E-05 | 2.158708951 |
| REV1   | -0.362474873 | 3.68402375 | -4.439661093 | 1.34E-05 | 3.00E-05 | 2.14852188  |
| SLC6A9 | -0.408950134 | 2.20642356 | -4.439268226 | 1.34E-05 | 3.00E-05 | 2.146903209 |
| C2CD2L | -0.186981073 | 2.64109559 | -4.438808233 | 1.35E-05 | 3.01E-05 | 2.145008124 |
| CKS1B  | -0.334631826 | 3.66970933 | -4.438565176 | 1.35E-05 | 3.01E-05 | 2.14400684  |
| ANKRD2 | 0.636689783  | 1.70497955 | 4.438214307  | 1.35E-05 | 3.02E-05 | 2.142561509 |
| AP1M1  | -0.191062536 | 3.30689074 | -4.438027429 | 1.35E-05 | 3.02E-05 | 2.141791743 |
| PCBP4  | -0.343237393 | 4.49799815 | -4.436602752 | 1.36E-05 | 3.04E-05 | 2.135924289 |
| ZIM2   | -0.063981171 | 0.11399378 | -4.436171065 | 1.36E-05 | 3.04E-05 | 2.134146729 |
| AP3M1  | -0.357054605 | 4.52521776 | -4.435813455 | 1.36E-05 | 3.05E-05 | 2.132674307 |
| MIEF1  | -0.329360047 | 3.9598345  | -4.435405741 | 1.37E-05 | 3.05E-05 | 2.130995712 |
| NSUN7  | -0.3573691   | 3.05537928 | -4.435286235 | 1.37E-05 | 3.05E-05 | 2.130503721 |
| POGLUT | -0.258281056 | 2.82454181 | -4.433791705 | 1.37E-05 | 3.07E-05 | 2.124351882 |
| UBE2A  | -0.3038853   | 5.28674756 | -4.432852149 | 1.38E-05 | 3.08E-05 | 2.120485356 |
| NUDT3  | -0.234100717 | 3.77840549 | -4.432232847 | 1.38E-05 | 3.09E-05 | 2.117937145 |
| AMTN   | 0.24886673   | 0.29146622 | 4.431827023  | 1.39E-05 | 3.10E-05 | 2.116267487 |
| CYP4X1 | -0.385421238 | 2.08930553 | -4.431734296 | 1.39E-05 | 3.10E-05 | 2.115886006 |
| MASP1  | -0.133544969 | 0.16379188 | -4.431379617 | 1.39E-05 | 3.10E-05 | 2.114426906 |
| AGA    | -0.328913509 | 5.26227294 | -4.42986756  | 1.40E-05 | 3.12E-05 | 2.10820763  |
| FGR    | 0.480582694  | 3.06606729 | 4.428884445  | 1.40E-05 | 3.14E-05 | 2.104164933 |
| S100A8 | 0.66067368   | 2.76666489 | 4.428831618  | 1.40E-05 | 3.14E-05 | 2.103947724 |
| OVOL2  | -0.345797578 | 3.47708114 | -4.428630895 | 1.41E-05 | 3.14E-05 | 2.103122426 |
| TMEM67 | -0.310138325 | 2.39320624 | -4.427699447 | 1.41E-05 | 3.15E-05 | 2.099293089 |
| ZSCAN3 | -0.20744256  | 1.17460559 | -4.427599793 | 1.41E-05 | 3.15E-05 | 2.098883435 |

|         |              |            |              |          |          |             |
|---------|--------------|------------|--------------|----------|----------|-------------|
| NFRKB   | -0.322356538 | 4.29141514 | -4.42696657  | 1.42E-05 | 3.16E-05 | 2.096280599 |
| CNOT8   | -0.299897783 | 5.60878795 | -4.426629109 | 1.42E-05 | 3.16E-05 | 2.094893605 |
| ATP6V0C | -0.359983729 | 6.24304074 | -4.426465307 | 1.42E-05 | 3.17E-05 | 2.094220398 |
| MTHFD2  | -0.275216838 | 2.66571917 | -4.426136495 | 1.42E-05 | 3.17E-05 | 2.092869088 |
| LIG3    | -0.263989765 | 2.82011009 | -4.426045053 | 1.42E-05 | 3.17E-05 | 2.092493303 |
| SORBS3  | -0.298612218 | 5.6605012  | -4.425910536 | 1.42E-05 | 3.17E-05 | 2.091940517 |
| DOCK1   | -0.41394684  | 5.13048725 | -4.425602654 | 1.42E-05 | 3.18E-05 | 2.090675353 |
| TRMT6   | -0.242925053 | 3.6575349  | -4.42514752  | 1.43E-05 | 3.18E-05 | 2.088805233 |
| B4GALT  | -0.257569659 | 4.82303539 | -4.423597304 | 1.44E-05 | 3.20E-05 | 2.082436719 |
| MUS81   | -0.245758097 | 4.24905397 | -4.423013958 | 1.44E-05 | 3.21E-05 | 2.08004074  |
| CORIN   | 0.184543981  | 0.34267777 | 4.422392148  | 1.44E-05 | 3.22E-05 | 2.077487083 |
| UBL3    | -0.402529811 | 6.26155947 | -4.422354029 | 1.44E-05 | 3.22E-05 | 2.077330545 |
| IKBKB   | -0.288043399 | 3.84574826 | -4.421983242 | 1.45E-05 | 3.22E-05 | 2.075807947 |
| TNFRSF  | 0.482698239  | 5.03409426 | 4.419701522  | 1.46E-05 | 3.25E-05 | 2.066440719 |
| CSNK1D  | -0.287134629 | 5.74240136 | -4.418212667 | 1.47E-05 | 3.27E-05 | 2.060330707 |
| ETNK1   | -0.344050065 | 4.54506019 | -4.418001695 | 1.47E-05 | 3.28E-05 | 2.059465056 |
| FAM199  | -0.346752325 | 4.87196516 | -4.417871346 | 1.47E-05 | 3.28E-05 | 2.05893023  |
| LIMD1   | -0.395587229 | 3.75842918 | -4.41764331  | 1.47E-05 | 3.28E-05 | 2.057994624 |
| MT3     | -0.532724966 | 0.87358696 | -4.41715899  | 1.48E-05 | 3.29E-05 | 2.056007656 |
| RNF182  | -0.347905591 | 1.27673231 | -4.417007895 | 1.48E-05 | 3.29E-05 | 2.055387812 |
| MARVEL  | 0.450274079  | 4.42816704 | 4.416133517  | 1.48E-05 | 3.30E-05 | 2.051801172 |
| TMIE    | -0.348990869 | 1.9708051  | -4.416032954 | 1.48E-05 | 3.30E-05 | 2.05138871  |
| CLEC4A  | 0.420704673  | 2.38956424 | 4.415830583  | 1.48E-05 | 3.30E-05 | 2.050558698 |
| CAPNS1  | -0.234237922 | 8.44415266 | -4.41458803  | 1.49E-05 | 3.32E-05 | 2.045463177 |
| OGFOD1  | -0.235208312 | 4.29284397 | -4.414540447 | 1.49E-05 | 3.32E-05 | 2.045268073 |
| SYNJ2B  | -0.124642852 | 0.51455844 | -4.413143157 | 1.50E-05 | 3.34E-05 | 2.039539519 |
| MICALL1 | -0.345728646 | 4.27255418 | -4.412743109 | 1.50E-05 | 3.35E-05 | 2.037899708 |
| SLC41A1 | -0.402824495 | 5.69435882 | -4.41263141  | 1.51E-05 | 3.35E-05 | 2.03744187  |
| DCAF12  | -0.318962811 | 4.9148333  | -4.411852644 | 1.51E-05 | 3.36E-05 | 2.034250109 |
| FAM163  | -0.337805482 | 0.34762874 | -4.41169595  | 1.51E-05 | 3.36E-05 | 2.033607962 |
| ASB7    | -0.259447176 | 3.46237111 | -4.410824297 | 1.52E-05 | 3.37E-05 | 2.030036189 |
| SHKBP1  | -0.251242001 | 5.72706587 | -4.410613177 | 1.52E-05 | 3.38E-05 | 2.029171175 |
| GSPT2   | -0.36694938  | 3.75373636 | -4.410233272 | 1.52E-05 | 3.38E-05 | 2.02761469  |
| SYTL2   | 0.378754723  | 1.93912759 | 4.408762261  | 1.53E-05 | 3.40E-05 | 2.021588995 |
| TBCB    | -0.250546858 | 5.70109871 | -4.408558411 | 1.53E-05 | 3.40E-05 | 2.020754098 |
| RBAK    | -0.288719751 | 2.890318   | -4.407583129 | 1.54E-05 | 3.42E-05 | 2.016760166 |
| VAMP7   | -0.311021534 | 5.45222193 | -4.406904036 | 1.54E-05 | 3.43E-05 | 2.01397962  |
| POLR2B  | -0.370209442 | 5.25675924 | -4.406854674 | 1.54E-05 | 3.43E-05 | 2.013777522 |
| TMEM17  | 0.72609911   | 3.43597972 | 4.406727397  | 1.54E-05 | 3.43E-05 | 2.013256434 |
| GIN3    | -0.197593449 | 1.77235354 | -4.40662996  | 1.54E-05 | 3.43E-05 | 2.012857521 |

|         |              |            |              |          |          |             |
|---------|--------------|------------|--------------|----------|----------|-------------|
| SLC44A3 | -0.356869038 | 3.09619226 | -4.40520731  | 1.55E-05 | 3.45E-05 | 2.007033989 |
| ZNF253  | -0.348023898 | 3.70756933 | -4.403814606 | 1.56E-05 | 3.47E-05 | 2.001334601 |
| HAUS8   | -0.20006791  | 1.87013112 | -4.403440193 | 1.57E-05 | 3.48E-05 | 1.999802646 |
| UBE2G1  | -0.311255619 | 4.54907587 | -4.403416625 | 1.57E-05 | 3.48E-05 | 1.99970622  |
| FOXJ3   | -0.32349153  | 4.54990905 | -4.403081758 | 1.57E-05 | 3.48E-05 | 1.998336174 |
| GNA11   | -0.323960129 | 5.60576685 | -4.402638614 | 1.57E-05 | 3.49E-05 | 1.996523271 |
| FAAP10C | -0.24880864  | 4.71613496 | -4.402538418 | 1.57E-05 | 3.49E-05 | 1.996113391 |
| AP1G1   | -0.315806908 | 4.80282054 | -4.402501122 | 1.57E-05 | 3.49E-05 | 1.995960822 |
| TFEC    | 0.339704634  | 0.88039391 | 4.401508872  | 1.58E-05 | 3.50E-05 | 1.991902204 |
| ATF7    | -0.228526568 | 2.94906156 | -4.401183618 | 1.58E-05 | 3.51E-05 | 1.990571982 |
| ITK     | 0.421860338  | 0.83869823 | 4.400405751  | 1.59E-05 | 3.52E-05 | 1.987391007 |
| CLCN3   | -0.371624417 | 4.87857609 | -4.400269855 | 1.59E-05 | 3.52E-05 | 1.98683533  |
| IL37    | 0.390041794  | 0.34956572 | 4.399361852  | 1.59E-05 | 3.53E-05 | 1.983122894 |
| ADRB3   | 0.124494366  | 0.15485943 | 4.398964663  | 1.60E-05 | 3.54E-05 | 1.981499166 |
| ANO4    | -0.147720999 | 0.18573584 | -4.398729367 | 1.60E-05 | 3.54E-05 | 1.980537325 |
| MGAT5B  | -0.160374573 | 0.3234587  | -4.398669531 | 1.60E-05 | 3.54E-05 | 1.980292733 |
| PPP4R2  | -0.28182817  | 4.96361798 | -4.397944237 | 1.60E-05 | 3.55E-05 | 1.977328192 |
| UBC     | -0.275417475 | 8.72435016 | -4.397720976 | 1.60E-05 | 3.55E-05 | 1.976415726 |
| ETAA1   | -0.267153782 | 3.73584039 | -4.396946285 | 1.61E-05 | 3.57E-05 | 1.97324988  |
| DGCR2   | -0.343161824 | 6.71913111 | -4.395951396 | 1.62E-05 | 3.58E-05 | 1.96918488  |
| CD3E    | 0.788825514  | 2.85914994 | 4.395659027  | 1.62E-05 | 3.59E-05 | 1.967990441 |
| AKT1    | -0.279661963 | 5.38992279 | -4.395451463 | 1.62E-05 | 3.59E-05 | 1.96714251  |
| KRTAP5  | -0.175046753 | 0.43389228 | 4.394704385  | 1.63E-05 | 3.60E-05 | 1.964090854 |
| KHDRBS  | -0.279755603 | 7.11421811 | -4.394602955 | 1.63E-05 | 3.60E-05 | 1.963676566 |
| CLEC11A | -0.444272976 | 4.25666178 | -4.393749361 | 1.63E-05 | 3.61E-05 | 1.960190428 |
| FETUB   | -0.134454354 | 0.12447232 | -4.393453633 | 1.63E-05 | 3.62E-05 | 1.958982793 |
| TGDS    | -0.335546652 | 4.12744687 | -4.391981209 | 1.64E-05 | 3.64E-05 | 1.952971024 |
| SPHK1   | 0.463745422  | 3.64044717 | 4.391755498  | 1.65E-05 | 3.64E-05 | 1.95204962  |
| CLVS1   | -0.096023118 | 0.16280108 | -4.391693102 | 1.65E-05 | 3.64E-05 | 1.951794913 |
| VPS26A  | -0.295391543 | 5.67120937 | -4.391272666 | 1.65E-05 | 3.65E-05 | 1.950078729 |
| CSKMT   | -0.27082879  | 2.27049693 | -4.39111546  | 1.65E-05 | 3.65E-05 | 1.949437062 |
| CAMLG   | -0.251717375 | 6.08544975 | -4.390289826 | 1.66E-05 | 3.66E-05 | 1.946067406 |
| SCUBE2  | -0.493296039 | 1.63700984 | -4.390111271 | 1.66E-05 | 3.67E-05 | 1.945338742 |
| PLAG1   | 0.661071868  | 2.88501904 | 4.388187052  | 1.67E-05 | 3.70E-05 | 1.937487826 |
| QKI     | -0.328266982 | 3.42080141 | -4.388126647 | 1.67E-05 | 3.70E-05 | 1.937241418 |
| PLA2G7  | -0.656438011 | 3.99241345 | -4.38769726  | 1.68E-05 | 3.70E-05 | 1.935489918 |
| CCDC14  | -0.228934486 | 1.7758478  | -4.387672484 | 1.68E-05 | 3.70E-05 | 1.935388861 |
| AFAP1L2 | -0.501634052 | 6.67490083 | -4.387169561 | 1.68E-05 | 3.71E-05 | 1.933337603 |
| RPL13A  | -0.302970351 | 11.0976513 | -4.385877602 | 1.69E-05 | 3.73E-05 | 1.92806905  |
| PRSS12  | 0.476839134  | 0.95125866 | 4.385376245  | 1.69E-05 | 3.74E-05 | 1.926024899 |

|         |              |            |              |          |          |             |
|---------|--------------|------------|--------------|----------|----------|-------------|
| TPPP3   | -0.598185583 | 3.95478561 | -4.384520147 | 1.70E-05 | 3.75E-05 | 1.922534845 |
| EIF3F   | -0.251928383 | 5.71404697 | -4.384188191 | 1.70E-05 | 3.75E-05 | 1.921181722 |
| KIAA089 | -0.252395425 | 1.77930639 | -4.383770119 | 1.70E-05 | 3.76E-05 | 1.919477692 |
| ZNF823  | -0.251144361 | 2.54188088 | -4.38346516  | 1.71E-05 | 3.77E-05 | 1.918234791 |
| LPIN3   | -0.375464076 | 3.76001581 | -4.382510594 | 1.71E-05 | 3.78E-05 | 1.914344809 |
| ZNF627  | -0.3507335   | 4.1603979  | -4.382405582 | 1.71E-05 | 3.78E-05 | 1.913916916 |
| RBM43   | -0.405538649 | 4.03006249 | -4.381142783 | 1.72E-05 | 3.80E-05 | 1.908772074 |
| HOMEZ   | -0.216719622 | 3.61741608 | -4.380748197 | 1.73E-05 | 3.81E-05 | 1.907164729 |
| TNFRSF  | 0.798646315  | 7.44694688 | 4.380580402  | 1.73E-05 | 3.81E-05 | 1.906481252 |
| FAN1    | -0.385491007 | 3.10734191 | -4.380302102 | 1.73E-05 | 3.81E-05 | 1.905347713 |
| ARHGEF  | -0.335025332 | 2.98376106 | -4.379153388 | 1.74E-05 | 3.83E-05 | 1.900669547 |
| ARG2    | -0.681836989 | 4.97379136 | -4.378903857 | 1.74E-05 | 3.84E-05 | 1.899653466 |
| RSU1    | -0.296975018 | 5.49099143 | -4.378812219 | 1.74E-05 | 3.84E-05 | 1.899280331 |
| MARK1   | -0.363301953 | 2.54487895 | -4.378516982 | 1.74E-05 | 3.84E-05 | 1.898078222 |
| SPAST   | -0.346608496 | 3.93691241 | -4.378449706 | 1.74E-05 | 3.84E-05 | 1.897804306 |
| CNTD2   | -0.70831809  | 3.17499393 | -4.378312729 | 1.74E-05 | 3.84E-05 | 1.897246613 |
| STAT4   | 0.524566303  | 1.95508856 | 4.376233291  | 1.76E-05 | 3.88E-05 | 1.888782138 |
| DPF1    | -0.066144963 | 0.15289887 | -4.375957819 | 1.76E-05 | 3.88E-05 | 1.887661072 |
| KCTD14  | -0.394330044 | 4.26064567 | -4.375608472 | 1.76E-05 | 3.89E-05 | 1.88623945  |
| INSL5   | -0.122498673 | 0.19900431 | -4.374906612 | 1.77E-05 | 3.90E-05 | 1.883383621 |
| TMEM15  | 0.367170727  | 1.02198113 | 4.374693499  | 1.77E-05 | 3.90E-05 | 1.882516553 |
| CPE     | -0.704801923 | 8.1585733  | -4.373379143 | 1.78E-05 | 3.92E-05 | 1.877169791 |
| C3orf52 | -0.504942905 | 3.00971381 | -4.371759697 | 1.79E-05 | 3.95E-05 | 1.870583835 |
| ZNF135  | -0.243599234 | 2.65444023 | -4.371284021 | 1.80E-05 | 3.96E-05 | 1.868649757 |
| ZNF24   | -0.292666767 | 5.08341581 | -4.370129297 | 1.81E-05 | 3.98E-05 | 1.863955452 |
| HLA-DPE | 0.761746419  | 7.4356803  | 4.369466722  | 1.81E-05 | 3.99E-05 | 1.861262363 |
| COMMD   | -0.232692176 | 4.1044899  | -4.368824198 | 1.82E-05 | 4.00E-05 | 1.858651112 |
| TTC4    | -0.186152193 | 1.6399998  | -4.366898189 | 1.83E-05 | 4.03E-05 | 1.850825684 |
| FHDC1   | -0.468475499 | 3.98741519 | -4.365493031 | 1.84E-05 | 4.05E-05 | 1.845118366 |
| GCHFR   | -0.327881827 | 3.3910617  | -4.365465762 | 1.84E-05 | 4.05E-05 | 1.845007621 |
| DNAJC1  | -0.361289953 | 3.7211174  | -4.364633386 | 1.85E-05 | 4.07E-05 | 1.84162753  |
| CCL16   | -0.105564099 | 0.25045921 | -4.364569135 | 1.85E-05 | 4.07E-05 | 1.841366646 |
| THUMPC  | -0.265028367 | 4.40945341 | -4.363402231 | 1.86E-05 | 4.09E-05 | 1.836629103 |
| ZC3H12E | -0.283027214 | 1.10166979 | -4.362710497 | 1.86E-05 | 4.10E-05 | 1.833821231 |
| ALDH16A | -0.281189216 | 4.2941566  | -4.362215751 | 1.87E-05 | 4.11E-05 | 1.831813204 |
| SLC5A7  | -0.361825813 | 0.29503383 | -4.360951655 | 1.88E-05 | 4.13E-05 | 1.826683503 |
| BRAT1   | -0.259403206 | 4.65611931 | -4.360896518 | 1.88E-05 | 4.13E-05 | 1.82645979  |
| GSTP1   | -0.367234291 | 9.7289909  | -4.360846986 | 1.88E-05 | 4.13E-05 | 1.826258816 |
| FTCD    | -0.228266869 | 0.36987524 | -4.359851367 | 1.89E-05 | 4.15E-05 | 1.822219579 |
| ZNF624  | -0.264856823 | 1.87907283 | -4.35931163  | 1.89E-05 | 4.15E-05 | 1.820030195 |

|          |              |            |              |          |          |             |
|----------|--------------|------------|--------------|----------|----------|-------------|
| SGSH     | -0.297448216 | 4.70812885 | -4.358493312 | 1.90E-05 | 4.17E-05 | 1.81671122  |
| ARL6IP1  | -0.294619955 | 7.07959295 | -4.358009862 | 1.90E-05 | 4.18E-05 | 1.814750669 |
| TPSB2    | 0.628025666  | 1.28804782 | 4.358003457  | 1.90E-05 | 4.18E-05 | 1.814724698 |
| GSAP     | -0.284931271 | 3.23263576 | -4.356398388 | 1.91E-05 | 4.20E-05 | 1.808216967 |
| PPP1R16  | 0.377544278  | 4.8113623  | 4.35575148   | 1.92E-05 | 4.22E-05 | 1.805594673 |
| IGFL4    | 0.135326057  | 0.19183858 | 4.354929071  | 1.93E-05 | 4.23E-05 | 1.802261451 |
| MAX      | -0.22584318  | 5.74112412 | -4.354848428 | 1.93E-05 | 4.23E-05 | 1.801934635 |
| CYB5R3   | -0.284865419 | 6.48184898 | -4.353362051 | 1.94E-05 | 4.26E-05 | 1.795911831 |
| FCGR2B   | 0.404535672  | 1.266114   | 4.352811637  | 1.94E-05 | 4.27E-05 | 1.793681999 |
| ZNF70    | -0.248461309 | 2.10862965 | -4.352164923 | 1.95E-05 | 4.28E-05 | 1.791062348 |
| FKBP1B   | -0.378498042 | 2.59794937 | -4.351593297 | 1.95E-05 | 4.29E-05 | 1.788747137 |
| DUSP6    | 0.777142735  | 7.56023567 | 4.350735832  | 1.96E-05 | 4.30E-05 | 1.78527471  |
| PPP1R3C  | -0.212544525 | 0.55426716 | -4.350494712 | 1.96E-05 | 4.31E-05 | 1.784298366 |
| STRN3    | -0.324532665 | 4.12855527 | -4.349902433 | 1.97E-05 | 4.32E-05 | 1.781900304 |
| SAMD4A   | 0.516522175  | 3.54943757 | 4.349708796  | 1.97E-05 | 4.32E-05 | 1.781116354 |
| YME1L1   | -0.352747019 | 5.81093459 | -4.348948018 | 1.98E-05 | 4.33E-05 | 1.778036589 |
| CELSR3   | 0.183243977  | 0.81176472 | 4.348696073  | 1.98E-05 | 4.34E-05 | 1.777016774 |
| CWF19L   | -0.245063003 | 4.06797141 | -4.348644412 | 1.98E-05 | 4.34E-05 | 1.776807672 |
| SMAD5    | -0.334340811 | 4.16587105 | -4.348572994 | 1.98E-05 | 4.34E-05 | 1.776518598 |
| KLHL6    | 0.417921388  | 1.14203878 | 4.348567638  | 1.98E-05 | 4.34E-05 | 1.776496919 |
| TMEM59   | 0.85543905   | 1.98347453 | 4.348338752  | 1.98E-05 | 4.34E-05 | 1.775570512 |
| MTMR14   | -0.182867881 | 4.51568177 | -4.346965218 | 1.99E-05 | 4.37E-05 | 1.770012055 |
| FXYP6    | -0.494682222 | 3.87981794 | -4.346796002 | 1.99E-05 | 4.37E-05 | 1.769327373 |
| BUB1     | 0.342472843  | 1.29480508 | 4.345975144  | 2.00E-05 | 4.38E-05 | 1.766006335 |
| TREM2    | 0.738512155  | 4.22360153 | 4.345903843  | 2.00E-05 | 4.38E-05 | 1.765717889 |
| SIGLEC10 | 0.437944832  | 1.16003516 | 4.344289992  | 2.02E-05 | 4.41E-05 | 1.75919022  |
| PI4K2A   | 0.314486278  | 5.33575432 | 4.343964943  | 2.02E-05 | 4.42E-05 | 1.757875723 |
| IL18     | 0.704637177  | 3.22882051 | 4.343850725  | 2.02E-05 | 4.42E-05 | 1.757413843 |
| RASSF4   | -0.368336265 | 5.13627747 | -4.343523287 | 2.02E-05 | 4.43E-05 | 1.756089799 |
| SP140    | 0.414331212  | 0.91326699 | 4.34256949   | 2.03E-05 | 4.44E-05 | 1.752233473 |
| DLGAP2   | -0.197244679 | 0.28439691 | -4.342517391 | 2.03E-05 | 4.44E-05 | 1.752022852 |
| RTF1     | -0.256598333 | 5.25139221 | -4.342377804 | 2.03E-05 | 4.45E-05 | 1.751458551 |
| HPN      | 0.940316247  | 5.80467699 | 4.342319498  | 2.03E-05 | 4.45E-05 | 1.751222843 |
| CD300LE  | 0.215665603  | 0.6359598  | 4.342071166  | 2.03E-05 | 4.45E-05 | 1.750218972 |
| TACR1    | 0.175770286  | 0.44969093 | 4.341283729  | 2.04E-05 | 4.46E-05 | 1.747036127 |
| ARHGEF   | -0.442898002 | 1.740581   | -4.341133547 | 2.04E-05 | 4.47E-05 | 1.746429142 |
| SEPSEC   | -0.276397678 | 2.92051911 | -4.340965118 | 2.04E-05 | 4.47E-05 | 1.745748434 |
| FIG4     | -0.22241164  | 4.48343023 | -4.340219049 | 2.05E-05 | 4.48E-05 | 1.742733445 |
| AHCYL1   | -0.329056225 | 6.90932632 | -4.339808988 | 2.05E-05 | 4.49E-05 | 1.741076513 |
| GPR37L   | -0.311342951 | 0.35028812 | -4.339568122 | 2.06E-05 | 4.49E-05 | 1.740103309 |

|         |              |            |              |          |          |             |
|---------|--------------|------------|--------------|----------|----------|-------------|
| SCAMP2  | -0.239602728 | 6.16006325 | -4.339473437 | 2.06E-05 | 4.50E-05 | 1.739720753 |
| KIAA121 | -0.306044127 | 4.07434395 | -4.338046674 | 2.07E-05 | 4.52E-05 | 1.733957071 |
| WDR17   | -0.341917632 | 1.34150587 | -4.337709219 | 2.07E-05 | 4.53E-05 | 1.732594096 |
| CLEC6A  | 0.128686357  | 0.15852489 | 4.337468877  | 2.07E-05 | 4.53E-05 | 1.731623417 |
| SECTM1  | 0.555427566  | 2.10205037 | 4.336555675  | 2.08E-05 | 4.55E-05 | 1.727935645 |
| UTP3    | -0.26382357  | 5.64970009 | -4.335977999 | 2.09E-05 | 4.56E-05 | 1.725603167 |
| PDE4D   | -0.499381909 | 2.37293492 | -4.335805784 | 2.09E-05 | 4.56E-05 | 1.724907871 |
| APPL2   | -0.323389013 | 4.05959539 | -4.335408152 | 2.09E-05 | 4.57E-05 | 1.723302566 |
| GP6     | -0.153748976 | 0.37565242 | -4.334783643 | 2.10E-05 | 4.58E-05 | 1.72078158  |
| PPM1E   | -0.112655256 | 0.32482369 | -4.334673709 | 2.10E-05 | 4.58E-05 | 1.720337836 |
| TTC22   | -0.246323502 | 2.99165032 | -4.334610395 | 2.10E-05 | 4.58E-05 | 1.720082278 |
| MYH10   | 0.580332664  | 5.80719253 | 4.334447052  | 2.10E-05 | 4.59E-05 | 1.719422979 |
| IMPAD1  | -0.325701163 | 5.54204693 | -4.333977847 | 2.11E-05 | 4.59E-05 | 1.717529248 |
| SIRPG   | 0.564885853  | 1.1836474  | 4.333476353  | 2.11E-05 | 4.60E-05 | 1.715505396 |
| ZNF488  | -0.087376565 | 0.14843184 | -4.33315843  | 2.11E-05 | 4.61E-05 | 1.714222475 |
| LGALS1  | 0.6512062    | 8.41342284 | 4.332676863  | 2.12E-05 | 4.62E-05 | 1.712279355 |
| GOLPH3  | -0.314000855 | 6.60682789 | -4.330056155 | 2.14E-05 | 4.67E-05 | 1.701708068 |
| SRSF10  | -0.311395717 | 4.75985967 | -4.328861274 | 2.15E-05 | 4.69E-05 | 1.696890047 |
| SURF2   | -0.315024413 | 5.90779721 | -4.328756422 | 2.15E-05 | 4.69E-05 | 1.696467318 |
| CASKIN1 | -0.311945453 | 1.14026981 | -4.328494788 | 2.15E-05 | 4.70E-05 | 1.695412525 |
| ZC3H12C | -0.354927472 | 2.87123421 | -4.327526178 | 2.16E-05 | 4.72E-05 | 1.691508008 |
| BOK     | -0.485699175 | 4.44212592 | -4.326905098 | 2.17E-05 | 4.73E-05 | 1.689004796 |
| FCAR    | 0.107671348  | 0.14483772 | 4.326304929  | 2.17E-05 | 4.74E-05 | 1.686586162 |
| GPR142  | -0.206916135 | 0.19086458 | -4.3262354   | 2.18E-05 | 4.74E-05 | 1.686305984 |
| LGALS12 | 0.114345233  | 0.2315338  | 4.325789987  | 2.18E-05 | 4.75E-05 | 1.684511216 |
| HTR2A   | 0.04804243   | 0.07163885 | 4.325648424  | 2.18E-05 | 4.75E-05 | 1.68394083  |
| CDC20   | -0.451601503 | 2.75415275 | -4.32526071  | 2.18E-05 | 4.76E-05 | 1.68237873  |
| IRX1    | -0.151943555 | 0.35053886 | -4.32498455  | 2.19E-05 | 4.76E-05 | 1.681266156 |
| NUP133  | -0.314693049 | 4.59106206 | -4.324550641 | 2.19E-05 | 4.77E-05 | 1.679518177 |
| NUTM2D  | -0.121468648 | 0.55438814 | -4.324368127 | 2.19E-05 | 4.77E-05 | 1.678782972 |
| PARVG   | 0.414126712  | 1.72903204 | 4.324001065  | 2.20E-05 | 4.78E-05 | 1.677304456 |
| CD33    | 0.272607511  | 0.98707185 | 4.323355791  | 2.20E-05 | 4.79E-05 | 1.674705571 |
| VSTM5   | -0.128818792 | 0.29699843 | -4.322262804 | 2.21E-05 | 4.82E-05 | 1.670304251 |
| CLEC4F  | 0.264690354  | 0.53190566 | 4.32205061   | 2.21E-05 | 4.82E-05 | 1.669449885 |
| CCR7    | 0.581502442  | 1.73352628 | 4.321096922  | 2.22E-05 | 4.84E-05 | 1.665610453 |
| NFASC   | -0.228571089 | 0.78509893 | -4.320696528 | 2.23E-05 | 4.85E-05 | 1.663998734 |
| TRAF5   | 0.31663204   | 1.47803367 | 4.320337707  | 2.23E-05 | 4.85E-05 | 1.662554471 |
| CASK    | -0.35083882  | 3.18158321 | -4.32022919  | 2.23E-05 | 4.85E-05 | 1.662117707 |
| PTPRN   | 0.086353587  | 0.09452874 | 4.318543656  | 2.25E-05 | 4.89E-05 | 1.655334919 |
| SEPTIN5 | -0.471595921 | 3.36395233 | -4.317834587 | 2.25E-05 | 4.90E-05 | 1.652482226 |

|         |              |            |              |          |          |             |
|---------|--------------|------------|--------------|----------|----------|-------------|
| RYK     | -0.338949635 | 4.82055027 | -4.317396235 | 2.26E-05 | 4.91E-05 | 1.650718872 |
| ARMC3   | -0.146514321 | 0.09341427 | -4.317236489 | 2.26E-05 | 4.91E-05 | 1.650076298 |
| SPAG8   | -0.342724075 | 2.39130642 | -4.316383927 | 2.27E-05 | 4.93E-05 | 1.646647258 |
| TRA2A   | -0.301545327 | 5.85889929 | -4.315316794 | 2.28E-05 | 4.95E-05 | 1.642356026 |
| SH3RF2  | -0.443409328 | 2.78969085 | -4.315304639 | 2.28E-05 | 4.95E-05 | 1.642307154 |
| DDX46   | -0.318948106 | 4.06042352 | -4.31485978  | 2.28E-05 | 4.96E-05 | 1.64051853  |
| RSRC2   | -0.295063736 | 4.74421514 | -4.314811518 | 2.28E-05 | 4.96E-05 | 1.640324495 |
| ZDHHC1  | -0.269488109 | 4.64683796 | -4.314754507 | 2.28E-05 | 4.96E-05 | 1.640095284 |
| CYTIP   | 0.63581622   | 2.33422621 | 4.313270251  | 2.30E-05 | 4.99E-05 | 1.634128885 |
| CD28    | 0.368528948  | 0.79657178 | 4.313194731  | 2.30E-05 | 4.99E-05 | 1.633825358 |
| RPS18   | -0.257019857 | 10.6564596 | -4.312243821 | 2.31E-05 | 5.01E-05 | 1.630003886 |
| PCDHAC  | 0.349108491  | 0.91913686 | 4.312042324  | 2.31E-05 | 5.02E-05 | 1.629194215 |
| PTGIS   | 0.540036375  | 1.45844802 | 4.311495598  | 2.31E-05 | 5.03E-05 | 1.626997476 |
| SLC4A7  | 0.371606677  | 2.1201898  | 4.310898202  | 2.32E-05 | 5.04E-05 | 1.624597421 |
| ZNF726  | -0.172219114 | 0.88958221 | -4.310503509 | 2.32E-05 | 5.05E-05 | 1.62301189  |
| INTS2   | -0.30175433  | 2.35321416 | -4.310088692 | 2.33E-05 | 5.05E-05 | 1.621345655 |
| XRCC4   | -0.24882937  | 2.83129148 | -4.309172343 | 2.34E-05 | 5.07E-05 | 1.617665355 |
| MATN3   | 0.397098402  | 1.17023158 | 4.307892586  | 2.35E-05 | 5.10E-05 | 1.612526646 |
| NFXL1   | -0.339855896 | 3.10391251 | -4.307072141 | 2.36E-05 | 5.12E-05 | 1.60923294  |
| TAF9B   | -0.269634185 | 5.04155109 | -4.306715082 | 2.36E-05 | 5.12E-05 | 1.607799684 |
| ADAMTS  | -0.318443701 | 1.60810883 | -4.306481765 | 2.36E-05 | 5.13E-05 | 1.606863191 |
| RSPH3   | -0.305766537 | 3.89202149 | -4.30638002  | 2.37E-05 | 5.13E-05 | 1.606454819 |
| PRKCD   | -0.266893026 | 7.04090958 | -4.304906985 | 2.38E-05 | 5.16E-05 | 1.600543453 |
| ZNF12   | -0.305077501 | 4.15769351 | -4.304627693 | 2.38E-05 | 5.17E-05 | 1.599422837 |
| ZSWIM1  | -0.228358797 | 3.8720656  | -4.304524326 | 2.38E-05 | 5.17E-05 | 1.599008105 |
| MROH7   | -0.086511238 | 0.161197   | -4.30441177  | 2.39E-05 | 5.17E-05 | 1.598556521 |
| GPR61   | -0.368088833 | 1.10365133 | -4.304411666 | 2.39E-05 | 5.17E-05 | 1.598556105 |
| CENPV   | -0.400076514 | 3.33704861 | -4.303748128 | 2.39E-05 | 5.18E-05 | 1.595894128 |
| PSG5    | 0.092803885  | 0.08072868 | 4.302849307  | 2.40E-05 | 5.20E-05 | 1.592288811 |
| TNFAIP8 | 0.542104957  | 2.82698708 | 4.302653301  | 2.40E-05 | 5.21E-05 | 1.591502683 |
| CDH26   | -0.108984618 | 0.37947839 | -4.302608803 | 2.40E-05 | 5.21E-05 | 1.591324217 |
| CD300C  | -0.419964626 | 2.26465841 | -4.302336326 | 2.41E-05 | 5.21E-05 | 1.590231452 |
| TMEM43  | 0.461158012  | 6.88853746 | 4.301222799  | 2.42E-05 | 5.23E-05 | 1.585766276 |
| CCNJ    | -0.329630046 | 2.7579952  | -4.301200501 | 2.42E-05 | 5.23E-05 | 1.585676871 |
| IQSEC1  | -0.242636364 | 4.64439196 | -4.300768079 | 2.42E-05 | 5.24E-05 | 1.583943164 |
| ABHD16  | -0.304700151 | 2.75645839 | -4.299802236 | 2.43E-05 | 5.26E-05 | 1.580071357 |
| SNX6    | -0.321812086 | 5.23689898 | -4.299794531 | 2.43E-05 | 5.26E-05 | 1.580040473 |
| ID2     | -0.408045035 | 8.05409765 | -4.299015884 | 2.44E-05 | 5.28E-05 | 1.576919634 |
| MAP3K5  | 0.577035938  | 5.1394242  | 4.298672791  | 2.44E-05 | 5.29E-05 | 1.575544665 |
| GBP5    | 0.606167605  | 1.44937021 | 4.298627464  | 2.44E-05 | 5.29E-05 | 1.575363022 |



|          |              |            |              |          |          |             |
|----------|--------------|------------|--------------|----------|----------|-------------|
| C6orf120 | -0.32517303  | 3.95320619 | -4.298524983 | 2.44E-05 | 5.29E-05 | 1.574952342 |
| CAPNS2   | -0.147342091 | 0.39933637 | -4.297949859 | 2.45E-05 | 5.30E-05 | 1.572647775 |
| CLIP2    | 0.374917647  | 2.85428105 | 4.297395529  | 2.46E-05 | 5.31E-05 | 1.570426779 |
| EIF4ENIF | -0.283143149 | 4.12035213 | -4.296762999 | 2.46E-05 | 5.33E-05 | 1.567892771 |
| PMS1     | -0.268285871 | 3.07211237 | -4.29644315  | 2.47E-05 | 5.33E-05 | 1.566611533 |
| EGR1     | -0.800627805 | 8.77581037 | -4.296421333 | 2.47E-05 | 5.33E-05 | 1.566524142 |
| TMA16    | -0.240055801 | 3.63959103 | -4.294936702 | 2.48E-05 | 5.37E-05 | 1.560578163 |
| CCDC10   | -0.240713137 | 1.79157361 | -4.29454564  | 2.49E-05 | 5.37E-05 | 1.559012249 |
| BLVRA    | -0.244740657 | 6.02065897 | -4.294295581 | 2.49E-05 | 5.38E-05 | 1.558011101 |
| DENND1   | -0.265306856 | 3.70603622 | -4.294161143 | 2.49E-05 | 5.38E-05 | 1.557472743 |
| SYCP2L   | -0.19218407  | 0.50486847 | -4.293339971 | 2.50E-05 | 5.40E-05 | 1.554185209 |
| PLEK     | 0.636089517  | 3.20857922 | 4.292897831  | 2.50E-05 | 5.41E-05 | 1.552415344 |
| C5orf15  | -0.339144748 | 6.61748044 | -4.292660775 | 2.51E-05 | 5.41E-05 | 1.551466482 |
| ADAM19   | 0.423805357  | 1.66678283 | 4.292559526  | 2.51E-05 | 5.41E-05 | 1.551061231 |
| SPIN3    | -0.290220027 | 2.26457426 | -4.292434233 | 2.51E-05 | 5.42E-05 | 1.550559749 |
| TUBB4B   | -0.331727305 | 8.66401572 | -4.292029018 | 2.51E-05 | 5.43E-05 | 1.548937983 |
| NOS3     | -0.374408668 | 3.01224146 | -4.291197686 | 2.52E-05 | 5.44E-05 | 1.545611207 |
| ARHGAP   | 0.522661334  | 1.94952427 | 4.291031815  | 2.52E-05 | 5.45E-05 | 1.544947503 |
| ESPNL    | -0.587877153 | 1.57523246 | -4.290632084 | 2.53E-05 | 5.46E-05 | 1.543348135 |
| CASS4    | 0.303235457  | 0.76348655 | 4.288750478  | 2.55E-05 | 5.50E-05 | 1.535821355 |
| MEF2B    | -0.193866572 | 0.96382939 | -4.288003123 | 2.56E-05 | 5.51E-05 | 1.532832586 |
| KIF21B   | 0.288027723  | 0.76203557 | 4.287964821  | 2.56E-05 | 5.51E-05 | 1.532679423 |
| TGFB3    | -0.391614026 | 2.7197051  | -4.287327716 | 2.56E-05 | 5.53E-05 | 1.530131934 |
| PSME1    | -0.282133586 | 8.24953152 | -4.287191946 | 2.56E-05 | 5.53E-05 | 1.529589094 |
| PPM1B    | -0.299855778 | 4.18924454 | -4.287140202 | 2.56E-05 | 5.53E-05 | 1.529382214 |
| NYAP2    | 0.295444344  | 0.23952154 | 4.286372446  | 2.57E-05 | 5.55E-05 | 1.526312864 |
| NIFK     | -0.268566723 | 5.18879795 | -4.285235912 | 2.59E-05 | 5.57E-05 | 1.521770079 |
| KCNE1    | 0.066522229  | 0.11010948 | 4.285113521  | 2.59E-05 | 5.58E-05 | 1.521280937 |
| RPL27A   | -0.298768792 | 8.33578436 | -4.284028095 | 2.60E-05 | 5.60E-05 | 1.516943517 |
| DCAF1    | -0.331599287 | 4.2178287  | -4.283765699 | 2.60E-05 | 5.61E-05 | 1.515895108 |
| SIK2     | -0.324039359 | 4.15775524 | -4.283401804 | 2.61E-05 | 5.61E-05 | 1.514441255 |
| NSA2     | -0.265313063 | 5.80633563 | -4.28324745  | 2.61E-05 | 5.62E-05 | 1.513824604 |
| COL11A2  | -0.676358246 | 1.71959608 | -4.283235136 | 2.61E-05 | 5.62E-05 | 1.51377541  |
| C1orf162 | 0.458145318  | 3.30383185 | 4.282684461  | 2.61E-05 | 5.63E-05 | 1.511575598 |
| SUDS3    | -0.266506209 | 5.15426853 | -4.282142644 | 2.62E-05 | 5.64E-05 | 1.509411408 |
| KCND2    | 0.129624773  | 0.17632637 | 4.281451358  | 2.63E-05 | 5.66E-05 | 1.506650542 |
| NECAP1   | -0.282353098 | 4.62022696 | -4.280314262 | 2.64E-05 | 5.68E-05 | 1.502110029 |
| MTMR2    | -0.26370066  | 3.7906485  | -4.280096176 | 2.64E-05 | 5.69E-05 | 1.501239314 |
| NAP1L3   | -0.50389473  | 3.28306304 | -4.279572235 | 2.65E-05 | 5.70E-05 | 1.499147621 |
| C16orf54 | 0.513419462  | 1.38336374 | 4.27956977   | 2.65E-05 | 5.70E-05 | 1.499137778 |

|         |              |            |              |          |          |             |
|---------|--------------|------------|--------------|----------|----------|-------------|
| BTBD1   | -0.325506695 | 5.87977215 | -4.279564502 | 2.65E-05 | 5.70E-05 | 1.499116751 |
| DOK3    | 0.404950053  | 1.77393009 | 4.279220058  | 2.65E-05 | 5.71E-05 | 1.497741772 |
| AZI2    | -0.356516592 | 3.12465383 | -4.27920687  | 2.65E-05 | 5.71E-05 | 1.497689129 |
| NOTCH2  | 0.537725728  | 4.87393033 | 4.278987694  | 2.65E-05 | 5.71E-05 | 1.496814259 |
| LHCGR   | -0.231747106 | 0.24499439 | -4.278797402 | 2.66E-05 | 5.71E-05 | 1.496054713 |
| DPH7    | -0.269324041 | 3.83342937 | -4.278675267 | 2.66E-05 | 5.72E-05 | 1.49556723  |
| RAB3GA  | -0.307976487 | 5.13955607 | -4.278654315 | 2.66E-05 | 5.72E-05 | 1.495483607 |
| DUSP16  | -0.335813847 | 4.85433633 | -4.278646337 | 2.66E-05 | 5.72E-05 | 1.495451763 |
| ZFP92   | -0.225402384 | 0.8128612  | -4.278411653 | 2.66E-05 | 5.72E-05 | 1.494515096 |
| CMTM1   | 0.34071283   | 1.43412967 | 4.278191003  | 2.66E-05 | 5.73E-05 | 1.493634487 |
| RCOR2   | -0.401055569 | 1.36419878 | -4.276514957 | 2.68E-05 | 5.76E-05 | 1.486946682 |
| MBLAC2  | -0.295398929 | 2.43596386 | -4.276247936 | 2.68E-05 | 5.77E-05 | 1.485881416 |
| NOP14   | -0.292586537 | 5.35005853 | -4.275879168 | 2.69E-05 | 5.78E-05 | 1.484410336 |
| NOA1    | -0.284151367 | 4.67156766 | -4.275425967 | 2.69E-05 | 5.79E-05 | 1.482602584 |
| CCR5    | 0.573341731  | 1.94641809 | 4.274782372  | 2.70E-05 | 5.80E-05 | 1.480035662 |
| ZNF594  | -0.32303917  | 2.51252996 | -4.274730927 | 2.70E-05 | 5.80E-05 | 1.479830493 |
| CDC42SI | -0.326468817 | 5.67966166 | -4.274599846 | 2.70E-05 | 5.81E-05 | 1.479307736 |
| FASN    | -0.387856748 | 4.39636985 | -4.274152614 | 2.71E-05 | 5.82E-05 | 1.477524255 |
| LRP8    | -0.611100959 | 3.59560776 | -4.273888332 | 2.71E-05 | 5.82E-05 | 1.476470423 |
| ZYX     | 0.4132867    | 6.81461471 | 4.273819636  | 2.71E-05 | 5.82E-05 | 1.476196505 |
| C2orf69 | -0.269741015 | 3.2997701  | -4.273415106 | 2.72E-05 | 5.83E-05 | 1.474583557 |
| TNNI2   | 0.363661879  | 0.88380928 | 4.273344734  | 2.72E-05 | 5.83E-05 | 1.474302983 |
| HLA-DM  | 0.598616223  | 6.15440107 | 4.273015873  | 2.72E-05 | 5.84E-05 | 1.472991862 |
| NASP    | -0.225084035 | 4.74542497 | -4.272601931 | 2.73E-05 | 5.85E-05 | 1.47134166  |
| RABGAP  | -0.338103593 | 4.93212915 | -4.272165712 | 2.73E-05 | 5.86E-05 | 1.4696028   |
| GPR21   | -0.338103593 | 4.93212915 | -4.272165712 | 2.73E-05 | 5.86E-05 | 1.4696028   |
| PIK3R6  | 0.277927348  | 1.07140136 | 4.271493615  | 2.74E-05 | 5.88E-05 | 1.466923983 |
| NBEAL2  | 0.354008945  | 3.43822617 | 4.271390634  | 2.74E-05 | 5.88E-05 | 1.466513555 |
| MED24   | -0.238371357 | 4.8622775  | -4.271337139 | 2.74E-05 | 5.88E-05 | 1.466300358 |
| GLUL    | -0.397171231 | 7.76580926 | -4.271300846 | 2.74E-05 | 5.88E-05 | 1.466155718 |
| ZNF256  | -0.224679298 | 2.99403063 | -4.271019031 | 2.74E-05 | 5.88E-05 | 1.465032621 |
| ANTXR1  | -0.528927552 | 4.9221114  | -4.270735673 | 2.75E-05 | 5.89E-05 | 1.463903444 |
| PAXIP1  | -0.24647932  | 2.24399357 | -4.270001662 | 2.76E-05 | 5.91E-05 | 1.460978717 |
| MORN5   | -0.199087725 | 0.18394857 | -4.269758326 | 2.76E-05 | 5.91E-05 | 1.460009219 |
| DAPK3   | -0.24141241  | 4.93924739 | -4.269554236 | 2.76E-05 | 5.92E-05 | 1.459196124 |
| ARSF    | -0.373713626 | 0.27106591 | -4.26938019  | 2.76E-05 | 5.92E-05 | 1.458502752 |
| ABHD14  | -0.150671057 | 0.5800595  | -4.269375684 | 2.76E-05 | 5.92E-05 | 1.458484801 |
| NUDCD1  | -0.286983944 | 3.4802507  | -4.269347808 | 2.76E-05 | 5.92E-05 | 1.45837375  |
| SOCS4   | -0.290034543 | 3.3240652  | -4.269240805 | 2.76E-05 | 5.92E-05 | 1.457947479 |
| PRSS35  | -0.285642327 | 0.63143821 | -4.268218629 | 2.78E-05 | 5.95E-05 | 1.453875891 |

|         |              |            |              |          |          |             |
|---------|--------------|------------|--------------|----------|----------|-------------|
| VASH2   | 0.148009892  | 0.39830236 | 4.266930681  | 2.79E-05 | 5.98E-05 | 1.448746867 |
| ATRIP   | -0.083529305 | 0.21112895 | -4.266822873 | 2.79E-05 | 5.98E-05 | 1.448317605 |
| RIC3    | -0.374205695 | 3.21477088 | -4.266380787 | 2.80E-05 | 5.99E-05 | 1.446557422 |
| VARS2   | -0.286146495 | 3.81351055 | -4.263987651 | 2.83E-05 | 6.05E-05 | 1.437031814 |
| MYBPC2  | 0.429042819  | 0.84195671 | 4.263452691  | 2.83E-05 | 6.06E-05 | 1.434903098 |
| SKOR1   | -0.118740807 | 0.38886896 | -4.261203343 | 2.86E-05 | 6.12E-05 | 1.425955017 |
| PTGER2  | 0.377807172  | 1.10417533 | 4.260642928  | 2.87E-05 | 6.13E-05 | 1.423726279 |
| PXK     | -0.406858395 | 4.97093384 | -4.260512118 | 2.87E-05 | 6.14E-05 | 1.423206095 |
| RSL1D1  | -0.254139864 | 6.07015276 | -4.260370179 | 2.87E-05 | 6.14E-05 | 1.422641667 |
| MYL12A  | -0.268103408 | 7.93976207 | -4.260177057 | 2.87E-05 | 6.14E-05 | 1.421873731 |
| FANCL   | -0.299964881 | 4.59644091 | -4.2599041   | 2.87E-05 | 6.15E-05 | 1.420788395 |
| FITM1   | -0.287098764 | 1.26537162 | -4.259676505 | 2.88E-05 | 6.15E-05 | 1.419883469 |
| CXADR   | -0.353745452 | 4.9838561  | -4.259234582 | 2.88E-05 | 6.16E-05 | 1.418126492 |
| TRIM29  | 0.754113321  | 1.7787144  | 4.258898627  | 2.89E-05 | 6.17E-05 | 1.416790927 |
| CATSPE  | -0.092444327 | 0.23656176 | -4.258654649 | 2.89E-05 | 6.18E-05 | 1.415821064 |
| ZNF506  | -0.275808293 | 3.26996664 | -4.258014157 | 2.90E-05 | 6.19E-05 | 1.413275209 |
| RGS4    | 0.75082768   | 1.71410584 | 4.257534952  | 2.90E-05 | 6.20E-05 | 1.41137066  |
| SAA2    | 0.391278072  | 0.45787615 | 4.257364104  | 2.91E-05 | 6.21E-05 | 1.410691688 |
| TFAM    | -0.315510735 | 4.50996061 | -4.256784653 | 2.91E-05 | 6.22E-05 | 1.408389051 |
| TRAM1   | -0.332221823 | 7.3927294  | -4.255524839 | 2.93E-05 | 6.25E-05 | 1.403383708 |
| RBBP5   | -0.270082219 | 4.38182152 | -4.255213436 | 2.93E-05 | 6.26E-05 | 1.402146675 |
| CLTRN   | -0.377119435 | 2.6762695  | -4.254677651 | 2.94E-05 | 6.28E-05 | 1.400018483 |
| LARP6   | -0.418350341 | 4.31313838 | -4.254595041 | 2.94E-05 | 6.28E-05 | 1.39969037  |
| ASMTL   | -0.269905685 | 5.69943904 | -4.254459209 | 2.94E-05 | 6.28E-05 | 1.399150879 |
| NOC4L   | -0.242847302 | 4.98948721 | -4.253845825 | 2.95E-05 | 6.29E-05 | 1.396714848 |
| SLC6A12 | 0.536047526  | 3.20362942 | 4.253431108  | 2.95E-05 | 6.30E-05 | 1.395067988 |
| ANXA1   | 0.744605704  | 9.00163729 | 4.252743968  | 2.96E-05 | 6.32E-05 | 1.392339632 |
| APBB1   | -0.32769995  | 4.54484165 | -4.251672601 | 2.98E-05 | 6.35E-05 | 1.388086429 |
| TMEM17  | -0.286019105 | 4.00422512 | -4.25142712  | 2.98E-05 | 6.36E-05 | 1.387112029 |
| DACT1   | -0.513085017 | 2.64134664 | -4.250256852 | 2.99E-05 | 6.39E-05 | 1.382467494 |
| SLC25A5 | -0.065893392 | 0.11345987 | -4.249768042 | 3.00E-05 | 6.40E-05 | 1.380527846 |
| F2RL2   | 0.373140472  | 0.82393013 | 4.249342715  | 3.00E-05 | 6.41E-05 | 1.378840262 |
| MFGE8   | 0.659366605  | 6.35362122 | 4.248814144  | 3.01E-05 | 6.42E-05 | 1.376743234 |
| TMEFF2  | -0.087615161 | 0.17716315 | -4.248655179 | 3.01E-05 | 6.43E-05 | 1.376112611 |
| TMEM17  | -0.293171798 | 2.92673762 | -4.248141547 | 3.02E-05 | 6.44E-05 | 1.374075135 |
| KCNS3   | 0.475168856  | 2.93456925 | 4.248052239  | 3.02E-05 | 6.44E-05 | 1.373720891 |
| RNF125  | 0.341586733  | 2.10102235 | 4.247431743  | 3.03E-05 | 6.45E-05 | 1.371259837 |
| NEURL4  | -0.260595574 | 3.77830184 | -4.247426695 | 3.03E-05 | 6.45E-05 | 1.371239818 |
| ZFYVE1  | -0.279311252 | 4.48112539 | -4.247412185 | 3.03E-05 | 6.45E-05 | 1.371182272 |
| BORCS5  | -0.216753153 | 2.50779171 | -4.24707526  | 3.03E-05 | 6.46E-05 | 1.369846075 |

|         |              |            |              |          |          |             |
|---------|--------------|------------|--------------|----------|----------|-------------|
| DMRTA1  | -0.291460542 | 2.06629704 | -4.2469533   | 3.03E-05 | 6.47E-05 | 1.369362418 |
| LRATD1  | 0.506372326  | 3.22164018 | 4.24578991   | 3.05E-05 | 6.50E-05 | 1.364749396 |
| UCHL1   | -0.593731671 | 3.1060928  | -4.245602525 | 3.05E-05 | 6.50E-05 | 1.364006489 |
| CHRNA1  | -0.19642894  | 0.81609548 | -4.245502864 | 3.05E-05 | 6.50E-05 | 1.363611382 |
| TRAF3IP | -0.23977689  | 3.98867428 | -4.245391631 | 3.05E-05 | 6.50E-05 | 1.363170412 |
| FUT10   | -0.279093049 | 2.18504681 | -4.244751535 | 3.06E-05 | 6.52E-05 | 1.360633006 |
| PRKAB2  | -0.311776789 | 2.9534166  | -4.24460097  | 3.06E-05 | 6.52E-05 | 1.360036198 |
| MVB12B  | -0.319703758 | 3.59500567 | -4.244371499 | 3.07E-05 | 6.53E-05 | 1.359126659 |
| TMBIM1  | -0.335336296 | 7.49292542 | -4.242975443 | 3.08E-05 | 6.57E-05 | 1.353594134 |
| ANKHD1  | -0.161935323 | 1.32294091 | -4.242206259 | 3.09E-05 | 6.59E-05 | 1.350546559 |
| ARL10   | 0.259192997  | 1.31296508 | 4.241108494  | 3.11E-05 | 6.62E-05 | 1.346197943 |
| ADCK5   | -0.284303176 | 3.13746368 | -4.240519901 | 3.12E-05 | 6.63E-05 | 1.343866731 |
| TCTN2   | -0.310993975 | 3.80997977 | -4.24045587  | 3.12E-05 | 6.63E-05 | 1.343613144 |
| INA     | 0.235111728  | 0.428381   | 4.239984919  | 3.12E-05 | 6.64E-05 | 1.341748099 |
| BMT2    | -0.273868971 | 3.35066624 | -4.239502591 | 3.13E-05 | 6.66E-05 | 1.339838184 |
| ZNF808  | -0.233108099 | 2.70179098 | -4.23940551  | 3.13E-05 | 6.66E-05 | 1.339453788 |
| CSTF2   | -0.28170263  | 4.11655932 | -4.239349048 | 3.13E-05 | 6.66E-05 | 1.339230229 |
| COL4A1  | -0.514948738 | 6.78969328 | -4.238242443 | 3.15E-05 | 6.69E-05 | 1.334849162 |
| RGS9BP  | -0.101445224 | 0.25785188 | -4.237873832 | 3.15E-05 | 6.70E-05 | 1.333390048 |
| GCC1    | -0.324511554 | 3.76858271 | -4.235110857 | 3.19E-05 | 6.78E-05 | 1.322456555 |
| TTLL11  | -0.240338128 | 1.83354343 | -4.234992488 | 3.19E-05 | 6.78E-05 | 1.321988289 |
| OCSTAM  | 0.090410443  | 0.10167703 | 4.234905278  | 3.19E-05 | 6.78E-05 | 1.321643296 |
| CLTA    | -0.279896689 | 7.94890375 | -4.234841147 | 3.19E-05 | 6.78E-05 | 1.321389608 |
| CDKN1B  | -0.322469661 | 6.13563989 | -4.234230617 | 3.20E-05 | 6.80E-05 | 1.318974618 |
| TRPC4AI | -0.241717406 | 6.53906492 | -4.234187117 | 3.20E-05 | 6.80E-05 | 1.318802565 |
| PPP1R3I | -0.305141661 | 3.28691454 | -4.233066148 | 3.21E-05 | 6.83E-05 | 1.314369332 |
| CD79A   | 1.25874823   | 2.50557745 | 4.232952325  | 3.22E-05 | 6.83E-05 | 1.313919241 |
| DARS2   | -0.314735969 | 3.69652145 | -4.23175407  | 3.23E-05 | 6.86E-05 | 1.309181598 |
| MEMO1   | -0.17298135  | 1.47881642 | -4.231728421 | 3.23E-05 | 6.86E-05 | 1.309080198 |
| ARHGAP  | 0.419862006  | 3.45321293 | 4.230302483  | 3.25E-05 | 6.90E-05 | 1.303443894 |
| BRIX1   | -0.229907756 | 3.93703611 | -4.230124834 | 3.25E-05 | 6.91E-05 | 1.302741813 |
| SLA2    | 0.465214374  | 1.21322693 | 4.229464422  | 3.26E-05 | 6.93E-05 | 1.300132059 |
| KRT17   | 1.089493935  | 2.67649492 | 4.228511007  | 3.28E-05 | 6.95E-05 | 1.296365064 |
| SNRPB   | -0.212044238 | 8.01995094 | -4.228050483 | 3.28E-05 | 6.97E-05 | 1.29454577  |
| EVI5    | -0.320668721 | 3.37929558 | -4.227671702 | 3.29E-05 | 6.98E-05 | 1.293049533 |
| ACLY    | -0.322414488 | 5.87813902 | -4.226339332 | 3.31E-05 | 7.01E-05 | 1.287787409 |
| ZNF189  | -0.31018189  | 4.37503561 | -4.226260871 | 3.31E-05 | 7.01E-05 | 1.28747758  |
| ECPAS   | -0.252270531 | 5.32355675 | -4.224428512 | 3.33E-05 | 7.07E-05 | 1.280243248 |
| ARHGAP  | -0.252949498 | 2.19599542 | -4.223079986 | 3.35E-05 | 7.11E-05 | 1.27492088  |
| ZG16    | -0.034860506 | 0.04869599 | -4.221967271 | 3.37E-05 | 7.14E-05 | 1.270530323 |

|         |              |            |              |          |          |             |
|---------|--------------|------------|--------------|----------|----------|-------------|
| TAF1C   | -0.297134895 | 4.25910252 | -4.221950091 | 3.37E-05 | 7.14E-05 | 1.270462539 |
| PLOD2   | -0.390665732 | 6.4874123  | -4.22174636  | 3.37E-05 | 7.14E-05 | 1.26965877  |
| SMPDL3  | -0.379364818 | 4.42586318 | -4.221551628 | 3.37E-05 | 7.15E-05 | 1.268890534 |
| HIST3H2 | 0.857402556  | 3.13705225 | 4.221262275  | 3.38E-05 | 7.16E-05 | 1.267749064 |
| BCLAF1  | -0.307912225 | 5.33987296 | -4.221093001 | 3.38E-05 | 7.16E-05 | 1.267081328 |
| PARP2   | -0.244882451 | 3.83842796 | -4.220814158 | 3.38E-05 | 7.17E-05 | 1.265981425 |
| MCM9    | -0.25729891  | 2.19930619 | -4.220311535 | 3.39E-05 | 7.18E-05 | 1.26399897  |
| SMIM24  | 0.723107338  | 1.11051275 | 4.219654117  | 3.40E-05 | 7.20E-05 | 1.261406286 |
| ENTPD5  | -0.292506588 | 2.49093438 | -4.219607336 | 3.40E-05 | 7.20E-05 | 1.261221806 |
| SLC22A5 | -0.259712535 | 2.53572638 | -4.219301611 | 3.40E-05 | 7.21E-05 | 1.260016236 |
| BCAR1   | -0.268571205 | 4.70174236 | -4.218734457 | 3.41E-05 | 7.22E-05 | 1.257779974 |
| RPL4    | -0.262013312 | 9.73341485 | -4.218649202 | 3.41E-05 | 7.23E-05 | 1.257443838 |
| ZNF644  | -0.322059271 | 3.98226143 | -4.216980731 | 3.44E-05 | 7.28E-05 | 1.25086676  |
| DOCK5   | -0.405157219 | 3.09038963 | -4.216513467 | 3.44E-05 | 7.29E-05 | 1.24902522  |
| FABP6   | -0.293107473 | 0.41737051 | -4.216476723 | 3.44E-05 | 7.29E-05 | 1.248880416 |
| ZSWIM6  | -0.323258144 | 3.2983448  | -4.216256817 | 3.45E-05 | 7.29E-05 | 1.24801381  |
| MSANTD  | -0.121015615 | 0.49154676 | -4.215963364 | 3.45E-05 | 7.30E-05 | 1.24685743  |
| RBBP4   | -0.270932488 | 5.60547879 | -4.215867235 | 3.45E-05 | 7.30E-05 | 1.246478641 |
| IFT122  | -0.304283493 | 3.81496033 | -4.214638042 | 3.47E-05 | 7.34E-05 | 1.241635749 |
| DPP8    | -0.296119457 | 3.78782707 | -4.214068586 | 3.48E-05 | 7.36E-05 | 1.239392564 |
| PLP2    | 0.510583536  | 7.18465556 | 4.213457771  | 3.49E-05 | 7.37E-05 | 1.236986757 |
| RGS18   | 0.305911409  | 0.99354927 | 4.213425229  | 3.49E-05 | 7.37E-05 | 1.236858594 |
| USP14   | -0.279110044 | 4.95002085 | -4.212128671 | 3.51E-05 | 7.41E-05 | 1.231752898 |
| CPLX1   | -0.306542172 | 1.39871571 | -4.211903794 | 3.51E-05 | 7.42E-05 | 1.230867497 |
| HNRNPC  | -0.26864068  | 7.14955446 | -4.211762706 | 3.51E-05 | 7.42E-05 | 1.230312018 |
| CD40LG  | 0.412792416  | 0.85046868 | 4.211756668  | 3.51E-05 | 7.42E-05 | 1.230288247 |
| HSBP1L  | -0.322996632 | 4.75789623 | -4.211638224 | 3.51E-05 | 7.42E-05 | 1.229821929 |
| BBS10   | -0.333571755 | 3.85106597 | -4.210903369 | 3.52E-05 | 7.45E-05 | 1.226929058 |
| FAF1    | -0.245814799 | 4.86069796 | -4.209745087 | 3.54E-05 | 7.48E-05 | 1.222370188 |
| FZD5    | -0.443589691 | 3.79256716 | -4.20918668  | 3.55E-05 | 7.50E-05 | 1.220172747 |
| PLD6    | -0.264747958 | 2.31841282 | -4.208485086 | 3.56E-05 | 7.52E-05 | 1.217412203 |
| NUDT19  | -0.21257874  | 3.65761186 | -4.207759667 | 3.57E-05 | 7.54E-05 | 1.214558331 |
| RFC1    | -0.325933473 | 4.74302292 | -4.207657284 | 3.57E-05 | 7.54E-05 | 1.214155582 |
| GPR180  | -0.272626472 | 2.58443053 | -4.206727137 | 3.59E-05 | 7.57E-05 | 1.210496996 |
| ZNF714  | 0.567971913  | 2.85847102 | 4.206636614  | 3.59E-05 | 7.57E-05 | 1.210140976 |
| LAMA1   | 0.580464109  | 2.33889334 | 4.205856921  | 3.60E-05 | 7.60E-05 | 1.207074777 |
| GALNT1  | -0.444619174 | 1.63870799 | -4.205176525 | 3.61E-05 | 7.62E-05 | 1.204399471 |
| HLA-DQ  | 1.024828113  | 4.52039208 | 4.205169584  | 3.61E-05 | 7.62E-05 | 1.204372184 |
| MAP3K9  | -0.308707134 | 2.48982565 | -4.205022728 | 3.61E-05 | 7.62E-05 | 1.203794798 |
| DNAJC1  | -0.257845627 | 3.4777377  | -4.205018878 | 3.61E-05 | 7.62E-05 | 1.20377966  |

|          |              |            |              |          |          |             |
|----------|--------------|------------|--------------|----------|----------|-------------|
| ANKDD1   | -0.332898183 | 2.34333987 | -4.202932937 | 3.64E-05 | 7.68E-05 | 1.195580403 |
| TTC27    | -0.260762948 | 4.15971735 | -4.201732682 | 3.66E-05 | 7.72E-05 | 1.190864133 |
| SLC2A7   | -0.052857182 | 0.06891661 | -4.201559633 | 3.66E-05 | 7.73E-05 | 1.190184253 |
| BTN2A1   | -0.317396553 | 4.25022786 | -4.200834612 | 3.67E-05 | 7.75E-05 | 1.187336035 |
| ZNF74    | -0.267207195 | 2.72185224 | -4.198297376 | 3.71E-05 | 7.83E-05 | 1.177371968 |
| GPATCH   | -0.253597641 | 2.62321982 | -4.19816647  | 3.71E-05 | 7.83E-05 | 1.176858025 |
| ETHE1    | 0.49789516   | 6.14748768 | 4.197796555  | 3.72E-05 | 7.84E-05 | 1.175405796 |
| RNF220   | -0.20038307  | 4.43697315 | -4.197712878 | 3.72E-05 | 7.84E-05 | 1.175077308 |
| TSC22D1  | -0.490116291 | 6.82819126 | -4.197207429 | 3.73E-05 | 7.86E-05 | 1.173093209 |
| HNRNP1   | -0.347237871 | 6.17514762 | -4.194723319 | 3.77E-05 | 7.94E-05 | 1.163345054 |
| METAP1   | -0.267709349 | 4.56956765 | -4.193540084 | 3.79E-05 | 7.98E-05 | 1.158703567 |
| DDX18    | -0.322537209 | 4.66768376 | -4.192086842 | 3.81E-05 | 8.02E-05 | 1.153004484 |
| TAS1R1   | -0.214587094 | 0.25029767 | -4.192056467 | 3.81E-05 | 8.02E-05 | 1.15288538  |
| UPF2     | -0.303480841 | 4.33896589 | -4.191793881 | 3.81E-05 | 8.03E-05 | 1.151855804 |
| SNRK     | -0.332396764 | 4.6372059  | -4.190586034 | 3.83E-05 | 8.07E-05 | 1.147120666 |
| PRR14    | -0.209497343 | 4.88985724 | -4.190456149 | 3.83E-05 | 8.07E-05 | 1.146611547 |
| DISP1    | -0.287186827 | 3.66912903 | -4.190101588 | 3.84E-05 | 8.09E-05 | 1.145221818 |
| NOS1AP   | 0.228090869  | 0.60180757 | 4.189247386  | 3.85E-05 | 8.11E-05 | 1.141874134 |
| MMRN1    | -0.510336703 | 1.54140598 | -4.189152457 | 3.86E-05 | 8.12E-05 | 1.141502138 |
| SF3B4    | -0.233061284 | 6.80324077 | -4.189096423 | 3.86E-05 | 8.12E-05 | 1.141282561 |
| IL17RB   | -0.25824527  | 2.48930231 | -4.188333934 | 3.87E-05 | 8.14E-05 | 1.138294905 |
| ITGB7    | 0.536166796  | 2.0112322  | 4.187397469  | 3.88E-05 | 8.17E-05 | 1.134626204 |
| AP2M1    | -0.245780442 | 7.72386872 | -4.187285811 | 3.89E-05 | 8.17E-05 | 1.13418882  |
| TLR8     | 0.348598817  | 0.84267894 | 4.186610694  | 3.90E-05 | 8.20E-05 | 1.131544485 |
| TMEM33   | -0.275726555 | 4.69324011 | -4.186455999 | 3.90E-05 | 8.20E-05 | 1.130938619 |
| DICER1   | -0.342647715 | 3.84095385 | -4.186374681 | 3.90E-05 | 8.20E-05 | 1.130620143 |
| SLC46A1  | -0.251478142 | 2.10708589 | -4.186044922 | 3.91E-05 | 8.21E-05 | 1.129328722 |
| BNIP3L   | -0.292290879 | 5.87817135 | -4.185890944 | 3.91E-05 | 8.22E-05 | 1.128725737 |
| PRSS23   | 0.738802534  | 5.49314378 | 4.185408691  | 3.92E-05 | 8.23E-05 | 1.12683733  |
| SOBP     | -0.469627668 | 2.75345672 | -4.184228108 | 3.93E-05 | 8.27E-05 | 1.122215209 |
| TM7SF3   | -0.418634085 | 5.7629638  | -4.183647927 | 3.94E-05 | 8.29E-05 | 1.119944145 |
| FAT3     | 0.033946438  | 0.03922284 | 4.18277265   | 3.96E-05 | 8.32E-05 | 1.116518477 |
| PYGO1    | -0.340377456 | 2.89746316 | -4.182500105 | 3.96E-05 | 8.33E-05 | 1.115451918 |
| PNMA5    | -0.113008311 | 0.11720443 | -4.182493813 | 3.96E-05 | 8.33E-05 | 1.115427297 |
| GOLGA2   | -0.292077934 | 5.62562039 | -4.181391955 | 3.98E-05 | 8.36E-05 | 1.111115974 |
| SFTA3    | -0.54514905  | 6.06860888 | -4.181382905 | 3.98E-05 | 8.36E-05 | 1.111080568 |
| RBMX2    | -0.21618071  | 4.66687686 | -4.180940605 | 3.99E-05 | 8.38E-05 | 1.109350227 |
| SERPINC1 | 0.605312471  | 6.84584933 | 4.179891524  | 4.01E-05 | 8.41E-05 | 1.105246715 |
| ARHGDI1  | -0.224356168 | 7.53724003 | -4.1793257   | 4.01E-05 | 8.43E-05 | 1.103033851 |
| CD3G     | 0.477411493  | 1.13889345 | 4.179219832  | 4.02E-05 | 8.43E-05 | 1.102619846 |

|         |              |            |              |          |          |             |
|---------|--------------|------------|--------------|----------|----------|-------------|
| GCLM    | -0.413883395 | 4.44094621 | -4.178549787 | 4.03E-05 | 8.45E-05 | 1.099999779 |
| PLPPR2  | -0.343377908 | 4.75450732 | -4.178476501 | 4.03E-05 | 8.46E-05 | 1.099713236 |
| FOSB    | -1.184081972 | 5.77855804 | -4.178190019 | 4.03E-05 | 8.46E-05 | 1.098593139 |
| CCAR1   | -0.268427899 | 4.92830999 | -4.177947571 | 4.04E-05 | 8.47E-05 | 1.097645259 |
| EXOG    | -0.232068466 | 2.3693989  | -4.177610053 | 4.04E-05 | 8.48E-05 | 1.096325775 |
| MFSD2A  | -0.766541662 | 3.9523236  | -4.177499316 | 4.05E-05 | 8.49E-05 | 1.095892883 |
| PGM3    | -0.294940433 | 3.97151427 | -4.176824758 | 4.06E-05 | 8.51E-05 | 1.093256118 |
| PGM2L1  | 0.440540409  | 2.96150028 | 4.175676701  | 4.08E-05 | 8.55E-05 | 1.088769363 |
| ZBTB24  | -0.257934526 | 3.02192879 | -4.17551085  | 4.08E-05 | 8.55E-05 | 1.088121283 |
| EMC1    | -0.296158247 | 4.16513332 | -4.175391092 | 4.08E-05 | 8.56E-05 | 1.08765333  |
| PEX26   | -0.246464928 | 3.17603474 | -4.175312786 | 4.08E-05 | 8.56E-05 | 1.087347357 |
| ZSCAN2  | -0.206623773 | 2.17382299 | -4.174935472 | 4.09E-05 | 8.57E-05 | 1.085873112 |
| HACD1   | 0.478946723  | 3.2189908  | 4.174560538  | 4.09E-05 | 8.58E-05 | 1.084408281 |
| TLE2    | -0.348754732 | 6.10021647 | -4.17390948  | 4.11E-05 | 8.60E-05 | 1.081864933 |
| LSM14A  | -0.280158997 | 6.80633224 | -4.173873908 | 4.11E-05 | 8.60E-05 | 1.081725979 |
| ARHGAP  | -0.353528581 | 4.97036204 | -4.173847205 | 4.11E-05 | 8.60E-05 | 1.081621672 |
| NMBR    | -0.102960133 | 0.21585121 | -4.173207156 | 4.12E-05 | 8.63E-05 | 1.079121698 |
| CCDC50  | -0.27650258  | 4.55421809 | -4.17056592  | 4.16E-05 | 8.72E-05 | 1.06880881  |
| GRIPAP1 | -0.238476203 | 4.86602683 | -4.168840523 | 4.19E-05 | 8.78E-05 | 1.062074952 |
| SHOX2   | 0.180811313  | 0.3979411  | 4.16826008   | 4.20E-05 | 8.80E-05 | 1.059810152 |
| TRIM17  | 0.332312355  | 1.45163064 | 4.168106645  | 4.20E-05 | 8.80E-05 | 1.059211522 |
| ARHGEF  | -0.255716892 | 3.56177559 | -4.167822324 | 4.21E-05 | 8.81E-05 | 1.05810228  |
| BRICD5  | -0.474897545 | 3.20055607 | -4.166537392 | 4.23E-05 | 8.86E-05 | 1.05309011  |
| ABCD3   | -0.334942903 | 4.63014371 | -4.165577691 | 4.25E-05 | 8.89E-05 | 1.049347459 |
| CEP112  | -0.290219039 | 2.60640331 | -4.165455403 | 4.25E-05 | 8.90E-05 | 1.048870614 |
| CEP170  | 0.362493072  | 5.37323292 | 4.165026475  | 4.26E-05 | 8.91E-05 | 1.047198162 |
| PIAS4   | -0.214461578 | 4.09531535 | -4.164741267 | 4.26E-05 | 8.92E-05 | 1.046086178 |
| METTL1  | -0.297608064 | 4.35150849 | -4.164215948 | 4.27E-05 | 8.94E-05 | 1.044038211 |
| YOD1    | -0.292384823 | 3.06991285 | -4.164183435 | 4.27E-05 | 8.94E-05 | 1.043911466 |
| NPY1R   | 0.501131756  | 2.36029915 | 4.162804728  | 4.30E-05 | 8.99E-05 | 1.038537659 |
| MS4A2   | 0.142135502  | 0.20967705 | 4.161476973  | 4.32E-05 | 9.04E-05 | 1.033363915 |
| VPS4B   | -0.319411326 | 5.29234298 | -4.161439265 | 4.32E-05 | 9.04E-05 | 1.033217005 |
| PLEKHA  | -0.30479938  | 4.3381845  | -4.160682906 | 4.33E-05 | 9.06E-05 | 1.030270436 |
| MAGEE1  | -0.293735354 | 2.8906084  | -4.159228713 | 4.36E-05 | 9.12E-05 | 1.02460661  |
| AKAP12  | -0.629078101 | 3.8624581  | -4.159078967 | 4.36E-05 | 9.12E-05 | 1.024023472 |
| PFN1    | -0.240912439 | 9.36648768 | -4.158910368 | 4.37E-05 | 9.13E-05 | 1.02336694  |
| BASP1   | 0.699955221  | 6.108724   | 4.158119574  | 4.38E-05 | 9.15E-05 | 1.020287867 |
| STX4    | -0.206164711 | 5.15344656 | -4.15805751  | 4.38E-05 | 9.15E-05 | 1.020046234 |
| TXN     | -0.268289929 | 7.86721273 | -4.157634125 | 4.39E-05 | 9.17E-05 | 1.018397957 |
| DRD1    | -0.144911411 | 0.13238893 | -4.15680325  | 4.40E-05 | 9.20E-05 | 1.0151637   |

|         |              |            |              |          |          |             |
|---------|--------------|------------|--------------|----------|----------|-------------|
| SFT2D2  | -0.269560831 | 4.00091137 | -4.156703691 | 4.41E-05 | 9.20E-05 | 1.014776198 |
| HNRNPC  | -0.287003926 | 6.830491   | -4.156453496 | 4.41E-05 | 9.21E-05 | 1.013802422 |
| SPATA4  | 0.113905936  | 0.16605721 | 4.156032685  | 4.42E-05 | 9.22E-05 | 1.012164714 |
| PGBD1   | -0.274699014 | 1.92107499 | -4.156014126 | 4.42E-05 | 9.22E-05 | 1.012092489 |
| TCIRG1  | 0.404581312  | 5.60042783 | 4.155303104  | 4.43E-05 | 9.25E-05 | 1.009325682 |
| CLEC1B  | 0.04263586   | 0.06354871 | 4.154223624  | 4.45E-05 | 9.29E-05 | 1.005125879 |
| KIAA023 | -0.338892422 | 4.51097339 | -4.153959142 | 4.46E-05 | 9.30E-05 | 1.004097038 |
| CTNND1  | -0.376284503 | 6.77272156 | -4.153911148 | 4.46E-05 | 9.30E-05 | 1.003910345 |
| TOB2    | -0.380697011 | 6.55510099 | -4.15333871  | 4.47E-05 | 9.32E-05 | 1.001683759 |
| ZNF423  | -0.313720205 | 1.69071301 | -4.152948967 | 4.47E-05 | 9.33E-05 | 1.000167949 |
| PHKG1   | -0.179130898 | 0.91169241 | -4.152591465 | 4.48E-05 | 9.35E-05 | 0.998777642 |
| KRBOX1  | -0.466114443 | 1.10648125 | -4.151851171 | 4.49E-05 | 9.37E-05 | 0.995899009 |
| TEDC1   | -0.261173305 | 2.23082445 | -4.151423401 | 4.50E-05 | 9.39E-05 | 0.994235828 |
| PLAT    | -0.558487469 | 4.03033499 | -4.151418009 | 4.50E-05 | 9.39E-05 | 0.994214866 |
| SRPK2   | -0.305248166 | 3.93239033 | -4.151342829 | 4.50E-05 | 9.39E-05 | 0.993922581 |
| UBE2W   | -0.261473392 | 3.58644489 | -4.151182557 | 4.51E-05 | 9.40E-05 | 0.99329949  |
| RUBCN   | 0.302759378  | 3.77961685 | 4.150675127  | 4.52E-05 | 9.41E-05 | 0.991326884 |
| IDE     | -0.290057037 | 4.20787585 | -4.15062523  | 4.52E-05 | 9.41E-05 | 0.991132922 |
| SLC25A2 | -0.245162233 | 3.58704812 | -4.150599748 | 4.52E-05 | 9.41E-05 | 0.99103387  |
| CSGALN  | 0.401880841  | 4.21150458 | 4.150243128  | 4.52E-05 | 9.43E-05 | 0.989647679 |
| SPEG    | -0.305720698 | 1.04572279 | -4.149409353 | 4.54E-05 | 9.46E-05 | 0.986407176 |
| GNS     | -0.314764844 | 6.70004797 | -4.148992427 | 4.55E-05 | 9.47E-05 | 0.984786988 |
| PKNOX1  | -0.330220394 | 3.82213424 | -4.148888006 | 4.55E-05 | 9.48E-05 | 0.984381227 |
| IDH3A   | -0.387742446 | 2.77360156 | -4.148816246 | 4.55E-05 | 9.48E-05 | 0.984102389 |
| YIPF2   | -0.274241223 | 6.4456161  | -4.148154084 | 4.56E-05 | 9.50E-05 | 0.981529594 |
| RTL9    | -0.20141463  | 0.32793288 | -4.148058087 | 4.56E-05 | 9.50E-05 | 0.981156631 |
| SCARF2  | -0.392094423 | 2.98648193 | -4.147960427 | 4.57E-05 | 9.51E-05 | 0.980777217 |
| AFMID   | -0.262233379 | 3.80361229 | -4.147758128 | 4.57E-05 | 9.51E-05 | 0.9799913   |
| PIGZ    | -0.350555746 | 1.88476023 | -4.14733356  | 4.58E-05 | 9.53E-05 | 0.978341989 |
| TMEM63  | 0.299886576  | 3.26379276 | 4.14559109   | 4.61E-05 | 9.60E-05 | 0.971574603 |
| CNR2    | -0.224640215 | 0.37950155 | -4.145457494 | 4.61E-05 | 9.60E-05 | 0.971055847 |
| ADAMTS  | 0.128984218  | 0.36245406 | 4.145266455  | 4.62E-05 | 9.61E-05 | 0.970314063 |
| IL31RA  | 0.074257783  | 0.07555053 | 4.144680181  | 4.63E-05 | 9.63E-05 | 0.968037816 |
| 1-Mar   | 0.277616308  | 1.2676277  | 4.144401361  | 4.63E-05 | 9.64E-05 | 0.966955374 |
| ADAM21  | -0.103028377 | 0.26859069 | -4.144256014 | 4.64E-05 | 9.64E-05 | 0.96639113  |
| XYLB    | 0.139758157  | 0.6666878  | 4.143433488  | 4.65E-05 | 9.67E-05 | 0.963198377 |
| FAM13B  | -0.328663978 | 3.87775968 | -4.142761619 | 4.66E-05 | 9.70E-05 | 0.96059083  |
| EPOP    | 0.442225904  | 2.03826047 | 4.142214748  | 4.67E-05 | 9.72E-05 | 0.958468675 |
| LRFN4   | 0.319580013  | 2.54415993 | 4.140986685  | 4.70E-05 | 9.77E-05 | 0.953704024 |
| MYL4    | -0.850110067 | 4.08761998 | -4.140372729 | 4.71E-05 | 9.79E-05 | 0.951322456 |



|         |              |            |              |          |          |             |
|---------|--------------|------------|--------------|----------|----------|-------------|
| TSPO2   | 0.101103057  | 0.2220205  | 4.140239647  | 4.71E-05 | 9.80E-05 | 0.950806264 |
| PSMC3IF | -0.233050814 | 1.99659482 | -4.140035078 | 4.72E-05 | 9.80E-05 | 0.95001282  |
| NME6    | -0.226918197 | 3.28472366 | -4.139475141 | 4.73E-05 | 9.82E-05 | 0.947841214 |
| UBA3    | -0.261927008 | 4.8289536  | -4.138362203 | 4.75E-05 | 9.87E-05 | 0.943525674 |
| USP22   | -0.320363504 | 6.59288975 | -4.138333396 | 4.75E-05 | 9.87E-05 | 0.943413984 |
| EXO5    | -0.228141799 | 2.51919303 | -4.137845424 | 4.76E-05 | 9.89E-05 | 0.941522148 |
| CELFB   | 0.475591217  | 3.23243424 | 4.137512842  | 4.77E-05 | 9.90E-05 | 0.940232861 |
| CASQ2   | -0.423112197 | 1.58162987 | -4.13732567  | 4.77E-05 | 9.90E-05 | 0.939507308 |
| MSN     | 0.386174436  | 8.69042412 | 4.137027088  | 4.77E-05 | 9.91E-05 | 0.938349948 |
| VPS36   | -0.299421465 | 4.74606348 | -4.136636313 | 4.78E-05 | 9.93E-05 | 0.936835343 |
| BCHE    | -0.692688809 | 1.10992192 | -4.13662897  | 4.78E-05 | 9.93E-05 | 0.936806883 |
| INTS11  | -0.24069956  | 5.14796704 | -4.136494731 | 4.79E-05 | 9.93E-05 | 0.936286615 |
| RNF103  | -0.245076626 | 3.80449481 | -4.136340724 | 4.79E-05 | 9.94E-05 | 0.935689753 |
| TCF7    | 0.514392085  | 3.00576438 | 4.135347057  | 4.81E-05 | 9.98E-05 | 0.931839197 |
| HERC1   | -0.337318378 | 3.77657715 | -4.134845065 | 4.82E-05 | 1.00E-04 | 0.929894237 |
| RNF175  | 0.239958649  | 0.70497228 | 4.134088224  | 4.83E-05 | 0.0001   | 0.926962259 |
| DHFR    | -0.299063821 | 2.55394343 | -4.133763143 | 4.84E-05 | 0.0001   | 0.925703053 |
| ZNF776  | -0.309860656 | 3.19370929 | -4.133732271 | 4.84E-05 | 0.0001   | 0.92558347  |
| ZNF37A  | -0.284650344 | 3.07194137 | -4.133344068 | 4.85E-05 | 0.0001   | 0.924079881 |
| DOCK2   | 0.440835389  | 1.56541191 | 4.13323817   | 4.85E-05 | 0.0001   | 0.923669738 |
| PROSER  | 0.391820135  | 3.44250065 | 4.132962608  | 4.85E-05 | 0.0001   | 0.922602527 |
| PLAA    | -0.26402311  | 4.32862383 | -4.132859618 | 4.86E-05 | 0.0001   | 0.92220368  |
| FILIP1  | -0.386677293 | 1.70491988 | -4.132707097 | 4.86E-05 | 0.0001   | 0.92161303  |
| GGCT    | 0.489804694  | 6.7407635  | 4.132529575  | 4.86E-05 | 0.0001   | 0.920925584 |
| FAM86B  | -0.175427074 | 0.55958282 | -4.131621555 | 4.88E-05 | 0.0001   | 0.917409722 |
| UPB1    | -0.069576395 | 0.13031502 | -4.131515959 | 4.88E-05 | 0.0001   | 0.917000898 |
| PRPF40B | -0.303816636 | 2.56630892 | -4.131066429 | 4.89E-05 | 0.0001   | 0.915260603 |
| FLI1    | -0.329991322 | 2.88856009 | -4.128504552 | 4.94E-05 | 0.0001   | 0.905345804 |
| TTLL12  | -0.290897763 | 4.09955029 | -4.127904911 | 4.96E-05 | 0.0001   | 0.903025892 |
| KMO     | 0.211545751  | 0.53036984 | 4.127784344  | 4.96E-05 | 0.0001   | 0.902559473 |
| MYL12B  | -0.26889267  | 9.87969347 | -4.127393694 | 4.97E-05 | 0.0001   | 0.90104831  |
| UBE2Z   | -0.279095693 | 6.27329581 | -4.127319633 | 4.97E-05 | 0.0001   | 0.900761832 |
| GPALPP  | -0.247960642 | 2.94023491 | -4.127105188 | 4.97E-05 | 0.0001   | 0.899932351 |
| DKK2    | 0.374121247  | 1.21754865 | 4.127055321  | 4.97E-05 | 0.0001   | 0.899739472 |
| IPO4    | -0.19988714  | 2.06587057 | -4.125560086 | 5.00E-05 | 0.0001   | 0.89395698  |
| PLPP4   | 0.482816682  | 0.94740027 | 4.124428527  | 5.03E-05 | 0.0001   | 0.88958214  |
| SLC25A5 | -0.234086258 | 2.82358025 | -4.124391274 | 5.03E-05 | 0.0001   | 0.889438132 |
| POLE3   | -0.272251429 | 5.7861719  | -4.122706986 | 5.06E-05 | 0.0001   | 0.882928329 |
| ARMH4   | -0.29490765  | 1.47152397 | -4.120756135 | 5.10E-05 | 0.00011  | 0.875391162 |
| CCDC3   | -0.498978883 | 3.82532618 | -4.120392642 | 5.11E-05 | 0.00011  | 0.873987142 |

|         |              |            |              |          |         |             |
|---------|--------------|------------|--------------|----------|---------|-------------|
| FAM104  | -0.273563029 | 3.87621083 | -4.119943929 | 5.12E-05 | 0.00011 | 0.872254102 |
| HMCN2   | -0.326938966 | 0.6664622  | -4.119777132 | 5.12E-05 | 0.00011 | 0.871609933 |
| TST     | -0.315662219 | 5.47417364 | -4.119596661 | 5.13E-05 | 0.00011 | 0.870912979 |
| DENND2  | -0.195539537 | 1.28487074 | -4.119594309 | 5.13E-05 | 0.00011 | 0.870903897 |
| XPOT    | -0.411891056 | 5.15039576 | -4.119262773 | 5.13E-05 | 0.00011 | 0.869623626 |
| FAM229  | -0.361495469 | 1.96994809 | -4.118535305 | 5.15E-05 | 0.00011 | 0.866814724 |
| TBC1D1  | -0.21468996  | 4.83617204 | -4.11705326  | 5.18E-05 | 0.00011 | 0.86109359  |
| CLTC    | -0.358642146 | 6.74665581 | -4.116729547 | 5.19E-05 | 0.00011 | 0.859844202 |
| WIPF3   | -0.418086184 | 2.51197648 | -4.116553297 | 5.19E-05 | 0.00011 | 0.859163992 |
| ZFP36L1 | 0.53828708   | 8.52122771 | 4.115616408  | 5.21E-05 | 0.00011 | 0.855548637 |
| FAM155  | -0.394148923 | 0.94354689 | -4.11528722  | 5.22E-05 | 0.00011 | 0.854278504 |
| MRNIP   | -0.315733773 | 3.2458912  | -4.115138013 | 5.22E-05 | 0.00011 | 0.853702837 |
| SLC18A3 | 0.509301462  | 0.59663692 | 4.115038482  | 5.22E-05 | 0.00011 | 0.853318838 |
| GART    | -0.290787857 | 4.0449598  | -4.115034717 | 5.22E-05 | 0.00011 | 0.853304312 |
| LURAP1  | -0.392972474 | 3.39846199 | -4.113448385 | 5.26E-05 | 0.00011 | 0.847185228 |
| SNCG    | 0.628770472  | 4.83468958 | 4.112329112  | 5.28E-05 | 0.00011 | 0.842869005 |
| GPR17   | -0.189238839 | 0.4886459  | -4.112284098 | 5.28E-05 | 0.00011 | 0.842695441 |
| ZNF136  | -0.278095076 | 3.32505045 | -4.112276421 | 5.28E-05 | 0.00011 | 0.842665842 |
| DENND3  | -0.237223477 | 2.76769113 | -4.111963685 | 5.29E-05 | 0.00011 | 0.841460042 |
| SGIP1   | -0.539662472 | 1.52114372 | -4.111308244 | 5.30E-05 | 0.00011 | 0.83893316  |
| MAPKAP  | -0.20125912  | 2.96830278 | -4.111089074 | 5.31E-05 | 0.00011 | 0.838088286 |
| COL14A1 | -0.690529102 | 5.94009617 | -4.11066751  | 5.32E-05 | 0.00011 | 0.836463316 |
| SLC2A1  | 0.351582347  | 1.95123572 | 4.110182427  | 5.33E-05 | 0.00011 | 0.834593684 |
| METTL2  | -0.300649327 | 5.95148125 | -4.110002683 | 5.33E-05 | 0.00011 | 0.833900956 |
| UBA1    | -0.251369449 | 7.77040944 | -4.109670439 | 5.34E-05 | 0.00011 | 0.832620568 |
| ZSWIM4  | 0.314367821  | 3.61650053 | 4.109485369  | 5.34E-05 | 0.00011 | 0.831907388 |
| RAD21   | -0.336585679 | 6.3087131  | -4.109396747 | 5.34E-05 | 0.00011 | 0.83156589  |
| MPL     | -0.149918944 | 0.54725461 | -4.109092781 | 5.35E-05 | 0.00011 | 0.830394623 |
| TCF15   | -0.320954585 | 0.86542904 | -4.108484508 | 5.36E-05 | 0.00011 | 0.828051006 |
| ZNF366  | -0.405942107 | 1.55723156 | -4.108476396 | 5.36E-05 | 0.00011 | 0.828019754 |
| KCNJ6   | 0.04031986   | 0.03480373 | 4.106543532  | 5.41E-05 | 0.00011 | 0.820574643 |
| GPR68   | 0.463982307  | 1.63593769 | 4.105875874  | 5.42E-05 | 0.00011 | 0.818003635 |
| NAB2    | 0.600063965  | 6.7962216  | 4.105324168  | 5.43E-05 | 0.00011 | 0.815879413 |
| BRD9    | -0.218851411 | 3.50001911 | -4.104798999 | 5.44E-05 | 0.00011 | 0.813857594 |
| NEK6    | 0.539331028  | 3.32650643 | 4.104605523  | 5.45E-05 | 0.00011 | 0.813112797 |
| LSS     | -0.23914777  | 3.99927738 | -4.104455967 | 5.45E-05 | 0.00011 | 0.812537097 |
| ZNF746  | -0.259726342 | 3.19291234 | -4.104140829 | 5.46E-05 | 0.00011 | 0.811324064 |
| NTNG1   | 0.04548122   | 0.05951882 | 4.104135637  | 5.46E-05 | 0.00011 | 0.811304076 |
| HNRNP   | -0.272479001 | 7.1293775  | -4.103928815 | 5.46E-05 | 0.00011 | 0.810508021 |
| CCN5    | 0.54879738   | 0.96831148 | 4.103438654  | 5.47E-05 | 0.00011 | 0.808621532 |

|         |              |            |              |          |         |             |
|---------|--------------|------------|--------------|----------|---------|-------------|
| LSMEM1  | -0.256775503 | 1.16977094 | -4.101755671 | 5.51E-05 | 0.00011 | 0.802145721 |
| LACTB   | -0.21755745  | 3.4002202  | -4.101402716 | 5.52E-05 | 0.00011 | 0.800787911 |
| SESTD1  | 0.293594077  | 2.20007043 | 4.101262557  | 5.52E-05 | 0.00011 | 0.800248749 |
| PMS2    | -0.308710379 | 3.06130143 | -4.099970411 | 5.55E-05 | 0.00011 | 0.79527891  |
| SPICE1  | -0.290116388 | 2.59367128 | -4.099753985 | 5.56E-05 | 0.00011 | 0.794446629 |
| PGM1    | -0.361684164 | 5.40056609 | -4.098958661 | 5.57E-05 | 0.00011 | 0.791388487 |
| VSTM2L  | 0.739841672  | 3.75706989 | 4.098918104  | 5.58E-05 | 0.00011 | 0.791232553 |
| CSDE1   | -0.305397838 | 8.27820832 | -4.0984767   | 5.59E-05 | 0.00011 | 0.789535525 |
| ZYG11A  | -0.363028374 | 1.58017075 | -4.097655335 | 5.60E-05 | 0.00012 | 0.786378121 |
| BMP2    | -0.534993071 | 4.2067215  | -4.096913892 | 5.62E-05 | 0.00012 | 0.783528421 |
| SAP130  | -0.271508898 | 4.21780578 | -4.096874415 | 5.62E-05 | 0.00012 | 0.783376706 |
| IFITM3  | -0.421410385 | 8.41413568 | -4.096518529 | 5.63E-05 | 0.00012 | 0.782009047 |
| CYSLTR: | 0.931007208  | 3.38648134 | 4.09435984   | 5.68E-05 | 0.00012 | 0.773715506 |
| VAMP3   | -0.269585578 | 6.92269158 | -4.093629656 | 5.70E-05 | 0.00012 | 0.770911056 |
| KCTD9   | -0.334368507 | 3.82859931 | -4.093529396 | 5.70E-05 | 0.00012 | 0.77052602  |
| ZNF561  | -0.272522578 | 3.83716898 | -4.092756984 | 5.72E-05 | 0.00012 | 0.767559921 |
| AZIN1   | -0.321321124 | 5.89059624 | -4.0923639   | 5.73E-05 | 0.00012 | 0.76605065  |
| GTF2F2  | -0.209514184 | 4.51679718 | -4.091289713 | 5.75E-05 | 0.00012 | 0.761926887 |
| NCK2    | -0.321207132 | 6.22256294 | -4.090154326 | 5.78E-05 | 0.00012 | 0.757569208 |
| CCNYL1  | -0.332474992 | 3.86114895 | -4.089962453 | 5.78E-05 | 0.00012 | 0.756832894 |
| ZNF397  | -0.251957147 | 3.53606104 | -4.089709308 | 5.79E-05 | 0.00012 | 0.755861495 |
| TLR3    | -0.350013413 | 2.34662119 | -4.089022723 | 5.80E-05 | 0.00012 | 0.753227113 |
| CCDC34  | -0.26110822  | 3.10321129 | -4.08826668  | 5.82E-05 | 0.00012 | 0.75032667  |
| PRDM6   | -0.245908157 | 0.89797166 | -4.08824285  | 5.82E-05 | 0.00012 | 0.750235256 |
| ALPK2   | 0.129343265  | 0.1337199  | 4.086359598  | 5.87E-05 | 0.00012 | 0.743012537 |
| SPART   | -0.308219676 | 5.03502793 | -4.085362762 | 5.89E-05 | 0.00012 | 0.739190614 |
| SLFN5   | 0.409308545  | 3.90760438 | 4.085265216  | 5.89E-05 | 0.00012 | 0.738816661 |
| PDGFRA  | 0.489535694  | 1.29677498 | 4.085066941  | 5.90E-05 | 0.00012 | 0.738056578 |
| NT5DC2  | -0.390576192 | 5.00164226 | -4.084046931 | 5.92E-05 | 0.00012 | 0.7341469   |
| FAM177: | -0.29730719  | 4.789472   | -4.081058203 | 5.99E-05 | 0.00012 | 0.722696097 |
| SLC36A4 | -0.229857221 | 2.27549231 | -4.080007093 | 6.02E-05 | 0.00012 | 0.718670697 |
| MMGT1   | -0.406591964 | 4.96755543 | -4.079636832 | 6.03E-05 | 0.00012 | 0.717252936 |
| USP18   | -0.393371063 | 3.09379524 | -4.07913266  | 6.04E-05 | 0.00012 | 0.715322601 |
| CXorf21 | 0.414325187  | 1.58064135 | 4.079063496  | 6.04E-05 | 0.00012 | 0.715057807 |
| RBM22   | -0.236862193 | 5.39261607 | -4.078395112 | 6.06E-05 | 0.00012 | 0.712499112 |
| MCF2L2  | 0.080041487  | 0.20092427 | 4.078165175  | 6.06E-05 | 0.00012 | 0.711618957 |
| PLXNB3  | -0.170580686 | 0.48179102 | -4.076387582 | 6.11E-05 | 0.00013 | 0.704816136 |
| ASH2L   | -0.246132468 | 4.49111004 | -4.076308695 | 6.11E-05 | 0.00013 | 0.704514295 |
| WDPCP   | -0.163400875 | 1.16816606 | -4.075535382 | 6.13E-05 | 0.00013 | 0.701555701 |
| NR2E3   | -0.105139556 | 0.33606906 | -4.075180028 | 6.14E-05 | 0.00013 | 0.700196328 |

|         |              |            |              |          |         |             |
|---------|--------------|------------|--------------|----------|---------|-------------|
| ACP2    | -0.232682336 | 5.35302676 | -4.074350171 | 6.16E-05 | 0.00013 | 0.697022197 |
| VPS11   | -0.2288707   | 5.33833326 | -4.074192733 | 6.16E-05 | 0.00013 | 0.696420073 |
| TCF7L2  | -0.33501644  | 4.12858586 | -4.073787665 | 6.17E-05 | 0.00013 | 0.694870981 |
| TNNI3K  | -0.064729618 | 0.13555519 | -4.073671886 | 6.17E-05 | 0.00013 | 0.694428233 |
| B4GALN  | -0.517846526 | 0.9575098  | -4.073447613 | 6.18E-05 | 0.00013 | 0.69357063  |
| RS1     | -0.138141323 | 0.42821248 | -4.07283585  | 6.20E-05 | 0.00013 | 0.691231507 |
| PDPR    | -0.332728187 | 3.70112429 | -4.072691001 | 6.20E-05 | 0.00013 | 0.690677712 |
| DEPDC4  | -0.131707862 | 0.71202758 | -4.071857056 | 6.22E-05 | 0.00013 | 0.687489652 |
| GNG8    | 0.366731254  | 0.67419037 | 4.071664475  | 6.22E-05 | 0.00013 | 0.686753524 |
| TNFAIP6 | 0.463578592  | 1.62648743 | 4.070653893  | 6.25E-05 | 0.00013 | 0.682891134 |
| MRPL9   | -0.250907429 | 6.1572222  | -4.070633738 | 6.25E-05 | 0.00013 | 0.682814114 |
| PLA2G2  | 0.882102687  | 1.64194652 | 4.069982375  | 6.27E-05 | 0.00013 | 0.680325096 |
| SOX7    | -0.373843776 | 2.23055059 | -4.069756602 | 6.27E-05 | 0.00013 | 0.679462446 |
| GSDMA   | 0.46884465   | 1.24785444 | 4.069354036  | 6.28E-05 | 0.00013 | 0.677924394 |
| BMP5    | -0.198824446 | 0.29460721 | -4.067432148 | 6.33E-05 | 0.00013 | 0.670583424 |
| POLR2M  | -0.313060595 | 4.2727292  | -4.067050031 | 6.34E-05 | 0.00013 | 0.669124228 |
| FAM222  | -0.269086954 | 1.47669217 | -4.066302365 | 6.36E-05 | 0.00013 | 0.666269453 |
| ADPRHL  | -0.219497122 | 6.43194592 | -4.064398795 | 6.41E-05 | 0.00013 | 0.659003231 |
| ALX4    | -0.152923446 | 0.16945446 | -4.062758143 | 6.45E-05 | 0.00013 | 0.652743005 |
| PGR     | 0.397396275  | 0.93244961 | 4.060468558  | 6.51E-05 | 0.00013 | 0.64401036  |
| RRP12   | -0.224981887 | 3.6445121  | -4.060320636 | 6.52E-05 | 0.00013 | 0.643446322 |
| ZNF551  | -0.282202135 | 2.6462598  | -4.058878457 | 6.55E-05 | 0.00013 | 0.637948144 |
| ARAP3   | -0.349440252 | 3.6444323  | -4.058158153 | 6.57E-05 | 0.00013 | 0.635202692 |
| IMPA1   | -0.319362891 | 4.20872674 | -4.057502112 | 6.59E-05 | 0.00013 | 0.632702549 |
| AZIN2   | -0.348463213 | 2.48009148 | -4.057098929 | 6.60E-05 | 0.00013 | 0.631166217 |
| UTS2B   | -0.043451717 | 0.10993225 | -4.056918066 | 6.61E-05 | 0.00013 | 0.630477078 |
| ZNF638  | -0.285259165 | 4.83958618 | -4.056539643 | 6.62E-05 | 0.00014 | 0.629035268 |
| CEP152  | -0.220415696 | 1.23244237 | -4.054660324 | 6.67E-05 | 0.00014 | 0.621876734 |
| GAK     | -0.1889457   | 4.42132911 | -4.054366085 | 6.67E-05 | 0.00014 | 0.620756211 |
| SYNJ1   | -0.318736444 | 2.95172446 | -4.054046988 | 6.68E-05 | 0.00014 | 0.619541101 |
| LLGL1   | 0.416239183  | 4.05985728 | 4.053666027  | 6.69E-05 | 0.00014 | 0.618090528 |
| CYP2D6  | -0.347897015 | 1.30606025 | -4.05316758  | 6.71E-05 | 0.00014 | 0.616192785 |
| MTA2    | -0.235560697 | 5.60899912 | -4.051940566 | 6.74E-05 | 0.00014 | 0.611522038 |
| FKBP14  | -0.259021537 | 2.67932251 | -4.051119571 | 6.76E-05 | 0.00014 | 0.608397533 |
| BRINP2  | 0.466635289  | 0.92436586 | 4.050438545  | 6.78E-05 | 0.00014 | 0.605806141 |
| CYP26A  | 0.236384018  | 0.33615164 | 4.049883555  | 6.79E-05 | 0.00014 | 0.603694615 |
| ENOPH1  | -0.254341348 | 6.18040716 | -4.047875824 | 6.85E-05 | 0.00014 | 0.596058084 |
| TNNI1   | 0.335575141  | 1.43186054 | 4.04565463   | 6.91E-05 | 0.00014 | 0.587613514 |
| THRSP   | -0.777560773 | 5.17501987 | -4.04501134  | 6.93E-05 | 0.00014 | 0.585168606 |
| RPS28   | -0.345041347 | 8.71904189 | -4.044135    | 6.95E-05 | 0.00014 | 0.581838508 |

|         |              |            |              |          |         |             |
|---------|--------------|------------|--------------|----------|---------|-------------|
| POGLUT  | -0.248658707 | 2.38649389 | -4.044037555 | 6.96E-05 | 0.00014 | 0.581468257 |
| CCDC14  | -0.065065989 | 0.16680265 | -4.043874396 | 6.96E-05 | 0.00014 | 0.580848337 |
| UNK     | -0.258034643 | 4.36791143 | -4.043494328 | 6.97E-05 | 0.00014 | 0.579404354 |
| TMOD2   | -0.330224836 | 2.08404454 | -4.043376979 | 6.97E-05 | 0.00014 | 0.578958537 |
| OSM     | 0.471885168  | 1.4147987  | 4.043375386  | 6.97E-05 | 0.00014 | 0.578952487 |
| INTS4   | -0.214313998 | 3.50280938 | -4.043235488 | 6.98E-05 | 0.00014 | 0.578421021 |
| TRIM50  | -0.374441096 | 0.4365372  | -4.043187379 | 6.98E-05 | 0.00014 | 0.57823826  |
| S100Z   | 0.087090431  | 0.22091172 | 4.041837003  | 7.02E-05 | 0.00014 | 0.573109123 |
| GGT2    | 0.501753426  | 1.863512   | 4.041022938  | 7.04E-05 | 0.00014 | 0.570017787 |
| MYOZ1   | -0.538559608 | 2.99723184 | -4.040745096 | 7.05E-05 | 0.00014 | 0.568962836 |
| NRDC    | -0.195797795 | 5.58747237 | -4.039793723 | 7.08E-05 | 0.00014 | 0.565350997 |
| DNAJC1  | -0.34144093  | 4.25451748 | -4.039016968 | 7.10E-05 | 0.00014 | 0.56240264  |
| SHOC2   | -0.268192057 | 5.23432901 | -4.03895366  | 7.10E-05 | 0.00014 | 0.562162364 |
| SLC30A2 | 0.78254373   | 5.39405955 | 4.038676636  | 7.11E-05 | 0.00014 | 0.561110988 |
| REPS2   | -0.344179587 | 1.99358182 | -4.0385609   | 7.11E-05 | 0.00014 | 0.560671761 |
| KCND3   | -0.242941775 | 0.50060809 | -4.038469723 | 7.11E-05 | 0.00014 | 0.560325746 |
| PTGER1  | 0.279799353  | 0.67261313 | 4.038019316  | 7.13E-05 | 0.00014 | 0.558616551 |
| SALL1   | -0.572259464 | 5.37364483 | -4.038015287 | 7.13E-05 | 0.00014 | 0.558601263 |
| BRWD1   | -0.288239581 | 3.45763333 | -4.037860225 | 7.13E-05 | 0.00015 | 0.558012877 |
| RNF216  | -0.258801705 | 4.67463226 | -4.037723682 | 7.13E-05 | 0.00015 | 0.557494778 |
| ZNF233  | -0.3216917   | 1.70209971 | -4.037680443 | 7.14E-05 | 0.00015 | 0.557330716 |
| SLC19A3 | 0.133870767  | 0.17917664 | 4.037668016  | 7.14E-05 | 0.00015 | 0.557283566 |
| SPRED3  | 0.27635413   | 1.37328551 | 4.037101328  | 7.15E-05 | 0.00015 | 0.555133514 |
| TMEM17  | 0.512138877  | 5.87587019 | 4.03661256   | 7.17E-05 | 0.00015 | 0.553279311 |
| DDX39A  | -0.223774177 | 4.66125463 | -4.036381703 | 7.17E-05 | 0.00015 | 0.552403595 |
| ACTL10  | -0.292072051 | 2.28407369 | -4.035909844 | 7.19E-05 | 0.00015 | 0.550613815 |
| HSF2    | -0.228825071 | 3.78907983 | -4.035852742 | 7.19E-05 | 0.00015 | 0.550397238 |
| P2RX1   | 0.292118041  | 0.59493913 | 4.034800908  | 7.22E-05 | 0.00015 | 0.546408304 |
| RINT1   | -0.234948543 | 3.57497877 | -4.034092395 | 7.24E-05 | 0.00015 | 0.543721883 |
| ZNF473  | -0.219894761 | 2.47412322 | -4.03348714  | 7.26E-05 | 0.00015 | 0.541427306 |
| PCDHGA  | -0.403412174 | 1.64667246 | -4.033460165 | 7.26E-05 | 0.00015 | 0.541325047 |
| ZNF394  | -0.187785002 | 4.23810546 | -4.032746855 | 7.28E-05 | 0.00015 | 0.538621231 |
| HSPA6   | 0.577936914  | 1.82816836 | 4.03106581   | 7.33E-05 | 0.00015 | 0.532250856 |
| SNX31   | -0.147521766 | 0.2481824  | -4.029897919 | 7.36E-05 | 0.00015 | 0.527826469 |
| IL18R1  | 0.586157184  | 1.85829992 | 4.029464193  | 7.37E-05 | 0.00015 | 0.52618365  |
| TMEM12  | -0.242667884 | 5.75785823 | -4.029357213 | 7.38E-05 | 0.00015 | 0.525778467 |
| STIMATE | -0.164418264 | 1.36010774 | -4.029321668 | 7.38E-05 | 0.00015 | 0.525643842 |
| BEND7   | -0.348804986 | 3.89609759 | -4.028712748 | 7.40E-05 | 0.00015 | 0.523337776 |
| LRRC41  | -0.273260163 | 5.17350282 | -4.028195794 | 7.41E-05 | 0.00015 | 0.521380238 |
| PABPN1  | -0.287830204 | 6.34967381 | -4.028025676 | 7.42E-05 | 0.00015 | 0.520736108 |

|         |              |            |              |          |         |             |
|---------|--------------|------------|--------------|----------|---------|-------------|
| THY1    | -0.473697451 | 5.337405   | -4.027812535 | 7.42E-05 | 0.00015 | 0.519929105 |
| RPS24   | -0.269370765 | 9.26812622 | -4.027715652 | 7.43E-05 | 0.00015 | 0.519562296 |
| LILRB4  | 0.524098381  | 2.140065   | 4.025734184  | 7.48E-05 | 0.00015 | 0.512061955 |
| SREK1   | -0.29567267  | 3.75290697 | -4.024916392 | 7.51E-05 | 0.00015 | 0.508967358 |
| TYROBP  | 0.593324239  | 6.18878398 | 4.024039695  | 7.54E-05 | 0.00015 | 0.505650474 |
| CLEC10A | 0.568671236  | 1.8907811  | 4.023467028  | 7.55E-05 | 0.00015 | 0.5034842   |
| DYNC2H1 | -0.336889073 | 2.43471865 | -4.023452294 | 7.55E-05 | 0.00015 | 0.503428469 |
| DCC     | 0.081611705  | 0.07553308 | 4.023101634  | 7.56E-05 | 0.00015 | 0.502102134 |
| TGOLN2  | -0.412963303 | 7.08309446 | -4.022882909 | 7.57E-05 | 0.00015 | 0.501274884 |
| IGF2BP2 | 0.793389233  | 4.69461937 | 4.022846164  | 7.57E-05 | 0.00015 | 0.501135912 |
| POLM    | -0.267189242 | 4.04987929 | -4.022559847 | 7.58E-05 | 0.00015 | 0.500053084 |
| ZNF316  | -0.245343159 | 5.04622564 | -4.021661336 | 7.61E-05 | 0.00015 | 0.496655432 |
| RHOQ    | -0.249556321 | 5.36464274 | -4.019765972 | 7.67E-05 | 0.00016 | 0.489490448 |
| PCYT1A  | -0.238370553 | 4.27093175 | -4.01938244  | 7.68E-05 | 0.00016 | 0.488040957 |
| AMPD1   | 0.3390393    | 0.38639854 | 4.019327436  | 7.68E-05 | 0.00016 | 0.487833089 |
| TFDP2   | -0.276901547 | 4.18585505 | -4.018546782 | 7.70E-05 | 0.00016 | 0.484883155 |
| UBXN1   | -0.253540957 | 7.51643719 | -4.018399046 | 7.71E-05 | 0.00016 | 0.484324946 |
| DCAF4L1 | -0.051397894 | 0.14830259 | -4.018254553 | 7.71E-05 | 0.00016 | 0.48377901  |
| LYL1    | -0.342640113 | 2.33054756 | -4.01766576  | 7.73E-05 | 0.00016 | 0.481554559 |
| UBALD2  | -0.252659466 | 6.15872682 | -4.0168842   | 7.75E-05 | 0.00016 | 0.478602278 |
| FBXL8   | -0.273191078 | 2.66510208 | -4.016672178 | 7.76E-05 | 0.00016 | 0.477801467 |
| NETO1   | 0.468988963  | 0.69746356 | 4.0164541    | 7.77E-05 | 0.00016 | 0.476977824 |
| ROBO3   | -0.348191563 | 1.34847075 | -4.016432676 | 7.77E-05 | 0.00016 | 0.476896911 |
| ENDOD1  | 0.508878218  | 5.88200227 | 4.015979121  | 7.78E-05 | 0.00016 | 0.475184047 |
| LETM2   | -0.119109778 | 0.72091911 | -4.015953863 | 7.78E-05 | 0.00016 | 0.475088662 |
| CHD8    | -0.298008921 | 4.497063   | -4.015106204 | 7.81E-05 | 0.00016 | 0.471887926 |
| TCF20   | -0.330512794 | 4.6549123  | -4.014781004 | 7.82E-05 | 0.00016 | 0.470660134 |
| TMPRSS  | 0.644461446  | 3.19226665 | 4.013090459  | 7.87E-05 | 0.00016 | 0.464278915 |
| MFSD12  | -0.230183951 | 4.27390366 | -4.011622567 | 7.92E-05 | 0.00016 | 0.458740052 |
| SCLT1   | -0.166949767 | 1.78168914 | -4.010947199 | 7.94E-05 | 0.00016 | 0.456192254 |
| PARP14  | 0.425794021  | 5.35626891 | 4.010833769  | 7.94E-05 | 0.00016 | 0.455764383 |
| LONP1   | -0.268275841 | 6.03298646 | -4.010785279 | 7.94E-05 | 0.00016 | 0.455581472 |
| S1PR2   | 0.408500815  | 3.27443403 | 4.009948622  | 7.97E-05 | 0.00016 | 0.452425859 |
| ZNF461  | -0.245718248 | 2.41162544 | -4.009927796 | 7.97E-05 | 0.00016 | 0.452347317 |
| PRSS2   | 1.153761563  | 2.61236649 | 4.009295623  | 7.99E-05 | 0.00016 | 0.449963348 |
| SBK1    | -0.346419887 | 3.37001042 | -4.00865953  | 8.01E-05 | 0.00016 | 0.447564931 |
| ZNF791  | -0.233591498 | 4.20793496 | -4.00743445  | 8.05E-05 | 0.00016 | 0.442946656 |
| SGCD    | -0.722939591 | 2.22142967 | -4.005971983 | 8.10E-05 | 0.00016 | 0.43743512  |
| SLAMF9  | 0.177209709  | 0.21151479 | 4.005384775  | 8.12E-05 | 0.00016 | 0.435222631 |
| MTHFD1  | -0.248203165 | 4.28777594 | -4.005339832 | 8.12E-05 | 0.00016 | 0.435053308 |

|         |              |            |              |          |         |             |
|---------|--------------|------------|--------------|----------|---------|-------------|
| RPSA    | -0.297109925 | 8.47258723 | -4.005268986 | 8.12E-05 | 0.00016 | 0.434786395 |
| C5orf58 | 0.079876393  | 0.17061094 | 4.004832319  | 8.14E-05 | 0.00016 | 0.433141345 |
| MASTL   | -0.235326806 | 2.95373304 | -4.004412789 | 8.15E-05 | 0.00016 | 0.431561003 |
| MDK     | 0.775291332  | 7.13415654 | 4.003884718  | 8.17E-05 | 0.00016 | 0.429572003 |
| SLAMF6  | 0.601695247  | 1.55817985 | 4.002880186  | 8.20E-05 | 0.00017 | 0.425789031 |
| RNF214  | -0.272496845 | 3.50443255 | -4.002840593 | 8.20E-05 | 0.00017 | 0.425639945 |
| GALNT7  | 0.555576136  | 5.10809953 | 4.002519089  | 8.21E-05 | 0.00017 | 0.424429376 |
| SGSM2   | -0.282531205 | 4.46952698 | -4.002408182 | 8.21E-05 | 0.00017 | 0.424011796 |
| RAP2B   | 0.295012891  | 4.24113568 | 4.001803408  | 8.23E-05 | 0.00017 | 0.421734914 |
| RFLNA   | 0.24791566   | 0.83129984 | 4.001309913  | 8.25E-05 | 0.00017 | 0.419877207 |
| SFRP4   | 0.958656895  | 2.99466783 | 4.000092476  | 8.29E-05 | 0.00017 | 0.415295163 |
| KIF1C   | -0.267927242 | 6.33684684 | -3.99972539  | 8.30E-05 | 0.00017 | 0.413913813 |
| RPL38   | -0.264233886 | 7.95623681 | -3.999648404 | 8.31E-05 | 0.00017 | 0.413624126 |
| PTK2    | -0.270001194 | 4.60333435 | -3.999199018 | 8.32E-05 | 0.00017 | 0.411933255 |
| PPIG    | -0.28365733  | 5.1139665  | -3.999057069 | 8.32E-05 | 0.00017 | 0.411399193 |
| STARD5  | -0.221327472 | 1.04455892 | -3.998938072 | 8.33E-05 | 0.00017 | 0.410951493 |
| WFDC2   | -0.619469894 | 8.19303651 | -3.998855758 | 8.33E-05 | 0.00017 | 0.410641812 |
| SLC22A1 | -0.503581299 | 5.5978618  | -3.99834805  | 8.35E-05 | 0.00017 | 0.408731847 |
| ACSL6   | -0.165237743 | 0.24052599 | -3.997263309 | 8.38E-05 | 0.00017 | 0.404651834 |
| CRK     | -0.25400551  | 6.11210409 | -3.997127123 | 8.39E-05 | 0.00017 | 0.404139668 |
| ZBTB47  | -0.319833246 | 4.9453806  | -3.996848136 | 8.40E-05 | 0.00017 | 0.40309051  |
| DIDO1   | -0.278600178 | 4.18355575 | -3.996658608 | 8.40E-05 | 0.00017 | 0.402377809 |
| IGFN1   | 1.166895621  | 2.4168805  | 3.996598795  | 8.41E-05 | 0.00017 | 0.402152894 |
| CD9     | -0.379931843 | 8.62355914 | -3.996537272 | 8.41E-05 | 0.00017 | 0.401921551 |
| GADD45  | -0.603706251 | 6.76743597 | -3.996181159 | 8.42E-05 | 0.00017 | 0.400582539 |
| DMRT3   | -0.827857479 | 3.30268033 | -3.996011559 | 8.43E-05 | 0.00017 | 0.399944869 |
| SETX    | -0.381008856 | 4.94498089 | -3.995825416 | 8.43E-05 | 0.00017 | 0.399245024 |
| LRP1    | 0.451537325  | 4.41265684 | 3.995548126  | 8.44E-05 | 0.00017 | 0.398202547 |
| CD99    | -0.305540657 | 6.38658044 | -3.995513373 | 8.44E-05 | 0.00017 | 0.398071896 |
| TEX22   | -0.168441341 | 0.61757786 | -3.995459613 | 8.44E-05 | 0.00017 | 0.397869792 |
| LMX1B   | -0.325394088 | 0.33537893 | -3.994533424 | 8.48E-05 | 0.00017 | 0.394388299 |
| PZP     | -0.050128774 | 0.14773328 | -3.994394703 | 8.48E-05 | 0.00017 | 0.393866917 |
| FOSL1   | 0.684262931  | 2.90417268 | 3.994303985  | 8.48E-05 | 0.00017 | 0.393525959 |
| ADGRL1  | -0.314161985 | 5.03471476 | -3.993494533 | 8.51E-05 | 0.00017 | 0.390484012 |
| ZNF324E | -0.204080059 | 2.24333883 | -3.993216834 | 8.52E-05 | 0.00017 | 0.389440535 |
| RPS6KA  | -0.140217872 | 0.6593983  | -3.991959884 | 8.56E-05 | 0.00017 | 0.384718239 |
| SIDT2   | -0.255263598 | 4.39202152 | -3.990880508 | 8.60E-05 | 0.00017 | 0.380664127 |
| RNF212E | -0.141151038 | 0.57734027 | -3.990683936 | 8.61E-05 | 0.00017 | 0.379925913 |
| LNPK    | -0.265974844 | 3.20073214 | -3.99050505  | 8.61E-05 | 0.00017 | 0.379254141 |
| NCAPD3  | -0.28998713  | 3.05321223 | -3.989842117 | 8.63E-05 | 0.00017 | 0.376764868 |

|          |              |            |              |          |         |             |
|----------|--------------|------------|--------------|----------|---------|-------------|
| TBX5     | -0.278140663 | 0.32788578 | -3.98920183  | 8.66E-05 | 0.00017 | 0.374360973 |
| DRP2     | 0.056772131  | 0.06641515 | 3.989193111  | 8.66E-05 | 0.00017 | 0.374328241 |
| TFE3     | -0.291682065 | 6.21872716 | -3.988637386 | 8.68E-05 | 0.00017 | 0.372242109 |
| DHRS3    | 0.61556275   | 8.35676525 | 3.988548928  | 8.68E-05 | 0.00017 | 0.37191007  |
| FAM217E  | -0.272488573 | 3.53925225 | -3.988255268 | 8.69E-05 | 0.00017 | 0.370807823 |
| MAPKBP   | -0.339946778 | 3.19418705 | -3.987647322 | 8.71E-05 | 0.00017 | 0.368526146 |
| WIPF1    | 0.343997093  | 3.92416458 | 3.986842078  | 8.74E-05 | 0.00018 | 0.36550446  |
| REEP6    | -0.447385828 | 4.25442602 | -3.986080361 | 8.76E-05 | 0.00018 | 0.362646605 |
| LAX1     | 0.518502316  | 0.84628941 | 3.984368628  | 8.82E-05 | 0.00018 | 0.356226184 |
| C17orf11 | -0.378486003 | 2.13069495 | -3.983855786 | 8.84E-05 | 0.00018 | 0.354303074 |
| AMBP     | -0.250361793 | 0.35146274 | -3.983782967 | 8.84E-05 | 0.00018 | 0.354030027 |
| KANK2    | 0.366349469  | 5.68938397 | 3.982505499  | 8.89E-05 | 0.00018 | 0.349240667 |
| MBIP     | -0.393939847 | 6.40601431 | -3.980529221 | 8.96E-05 | 0.00018 | 0.341834071 |
| TBXAS1   | 0.388200506  | 1.99974001 | 3.980331749  | 8.97E-05 | 0.00018 | 0.341094175 |
| WASHC1   | -0.342154224 | 3.38225789 | -3.979918377 | 8.98E-05 | 0.00018 | 0.339545436 |
| SPATC1   | 0.094232898  | 0.19114189 | 3.979718709  | 8.99E-05 | 0.00018 | 0.338797412 |
| ARCNI    | -0.302093573 | 6.96417816 | -3.979717241 | 8.99E-05 | 0.00018 | 0.338791913 |
| C17orf10 | -0.2652145   | 3.24036535 | -3.979515576 | 9.00E-05 | 0.00018 | 0.338036444 |
| CASC4    | -0.350867843 | 6.30107189 | -3.977527815 | 9.07E-05 | 0.00018 | 0.33059176  |
| CTPS2    | -0.248832886 | 3.59583604 | -3.976757126 | 9.09E-05 | 0.00018 | 0.327706214 |
| SLC7A5   | 0.580664976  | 3.03840458 | 3.976063329  | 9.12E-05 | 0.00018 | 0.325108982 |
| ZNF786   | -0.257422072 | 3.20254414 | -3.976017852 | 9.12E-05 | 0.00018 | 0.324938752 |
| CD69     | 0.592370005  | 2.08748498 | 3.975895003  | 9.13E-05 | 0.00018 | 0.324478913 |
| C11orf88 | -0.099772697 | 0.14907083 | -3.975809844 | 9.13E-05 | 0.00018 | 0.324160158 |
| SUCNR1   | -0.495904014 | 2.06017755 | -3.973806998 | 9.20E-05 | 0.00018 | 0.316665162 |
| DDAH1    | -0.325603831 | 5.97494626 | -3.973629851 | 9.21E-05 | 0.00018 | 0.316002407 |
| ELOA2    | -0.042977219 | 0.04088469 | -3.973595189 | 9.21E-05 | 0.00018 | 0.315872732 |
| SLC22A1  | -0.284332755 | 4.59309071 | -3.97327801  | 9.22E-05 | 0.00018 | 0.314686156 |
| SASH3    | 0.571445757  | 3.03650381 | 3.973030908  | 9.23E-05 | 0.00018 | 0.313761797 |
| LPP      | -0.293128601 | 2.77823188 | -3.972977031 | 9.23E-05 | 0.00018 | 0.313560259 |
| BIVM-ER  | -0.235969961 | 3.89599155 | -3.972575927 | 9.25E-05 | 0.00019 | 0.312059936 |
| ERCC5    | -0.235969961 | 3.89599155 | -3.972575927 | 9.25E-05 | 0.00019 | 0.312059936 |
| ITGA4    | 0.429517837  | 1.43534435 | 3.972553145  | 9.25E-05 | 0.00019 | 0.311974728 |
| LHFPL2   | -0.346178131 | 3.86840955 | -3.971356699 | 9.29E-05 | 0.00019 | 0.307500259 |
| CCNI     | -0.342434453 | 8.90980125 | -3.971312764 | 9.29E-05 | 0.00019 | 0.307335973 |
| ZFP14    | -0.251919583 | 2.89371471 | -3.971141918 | 9.30E-05 | 0.00019 | 0.306697144 |
| CCL19    | 1.204868705  | 2.6618207  | 3.971022425  | 9.30E-05 | 0.00019 | 0.306250353 |
| DNMT3A   | -0.267293378 | 2.95623378 | -3.970724723 | 9.31E-05 | 0.00019 | 0.305137275 |
| DZIP1    | 0.396211689  | 1.31184734 | 3.970493225  | 9.32E-05 | 0.00019 | 0.30427178  |
| ATP10A   | 0.461351144  | 2.0254799  | 3.970147397  | 9.34E-05 | 0.00019 | 0.302978921 |



|          |              |            |              |          |         |             |
|----------|--------------|------------|--------------|----------|---------|-------------|
| INTS5    | -0.241195647 | 4.93860296 | -3.969198823 | 9.37E-05 | 0.00019 | 0.299433244 |
| LIN54    | -0.292686532 | 3.41032697 | -3.969168891 | 9.37E-05 | 0.00019 | 0.299321374 |
| FOXDL    | -0.080693788 | 0.16276767 | -3.969056467 | 9.38E-05 | 0.00019 | 0.298901198 |
| BPIFB2   | -0.100668258 | 0.10584101 | -3.969010866 | 9.38E-05 | 0.00019 | 0.298730769 |
| SLC35A5  | -0.324886762 | 4.92729356 | -3.968586224 | 9.39E-05 | 0.00019 | 0.29714381  |
| DCUN1D   | -0.202220726 | 2.44233137 | -3.9678284   | 9.42E-05 | 0.00019 | 0.29431206  |
| MLNR     | -0.229965639 | 0.29675704 | -3.967747651 | 9.42E-05 | 0.00019 | 0.294010357 |
| RASSF5   | 0.35758938   | 3.96819631 | 3.967611882  | 9.43E-05 | 0.00019 | 0.293503091 |
| TAGLN2   | 0.404629096  | 8.53334939 | 3.967404112  | 9.44E-05 | 0.00019 | 0.292726841 |
| ARL15    | -0.297024798 | 4.16707999 | -3.966902815 | 9.46E-05 | 0.00019 | 0.290854093 |
| MSC      | 0.45306563   | 1.48418053 | 3.966511087  | 9.47E-05 | 0.00019 | 0.289390819 |
| ZNF131   | -0.22816238  | 3.06110873 | -3.965967992 | 9.49E-05 | 0.00019 | 0.287362338 |
| CD7      | 0.591684412  | 1.98857487 | 3.964704381  | 9.54E-05 | 0.00019 | 0.282643644 |
| RPH3AL   | -0.276378922 | 4.11273942 | -3.964626125 | 9.54E-05 | 0.00019 | 0.282351455 |
| RNASEK   | -0.200839367 | 3.7264327  | -3.963145216 | 9.60E-05 | 0.00019 | 0.2768231   |
| ZNF668   | -0.20536933  | 1.6925228  | -3.962925401 | 9.61E-05 | 0.00019 | 0.276002666 |
| STON1-C  | -0.082375998 | 0.11096418 | -3.962437124 | 9.62E-05 | 0.00019 | 0.274180377 |
| ZNF385E  | 0.173249356  | 0.24234621 | 3.962093373  | 9.64E-05 | 0.00019 | 0.272897589 |
| PDK2     | -0.369677258 | 4.73088326 | -3.961024737 | 9.68E-05 | 0.00019 | 0.26891035  |
| LARP1    | -0.294252865 | 6.52474214 | -3.96040212  | 9.70E-05 | 0.00019 | 0.266587711 |
| HIST2H3  | -0.176723475 | 0.44314392 | -3.960310224 | 9.71E-05 | 0.00019 | 0.266244926 |
| IL12RB1  | 0.354217133  | 1.13850914 | 3.959369619  | 9.74E-05 | 0.00019 | 0.262736739 |
| C20orf19 | -0.301210934 | 3.8133668  | -3.958944107 | 9.76E-05 | 0.00019 | 0.261149942 |
| ZNF419   | -0.218590422 | 2.42323426 | -3.958815935 | 9.76E-05 | 0.00019 | 0.260671999 |
| NDC1     | -0.269264917 | 3.44824059 | -3.958761015 | 9.76E-05 | 0.00019 | 0.26046721  |
| SLCO1C   | -0.22337041  | 0.78764692 | -3.958742247 | 9.77E-05 | 0.00019 | 0.260397228 |
| CCDC11   | -0.282285242 | 2.27071871 | -3.958660648 | 9.77E-05 | 0.00019 | 0.260092966 |
| S100A9   | 0.737987453  | 4.75348209 | 3.958462076  | 9.78E-05 | 0.00019 | 0.259352557 |
| BTBD16   | -0.079839966 | 0.14663116 | -3.957606382 | 9.81E-05 | 0.0002  | 0.256162351 |
| LAMC2    | 0.465805721  | 6.44212263 | 3.956821321  | 9.84E-05 | 0.0002  | 0.253236014 |
| MLIP     | -0.179840602 | 0.44180488 | -3.956562993 | 9.85E-05 | 0.0002  | 0.252273198 |
| TRIM6    | -0.438034332 | 2.53844269 | -3.956213069 | 9.86E-05 | 0.0002  | 0.250969087 |
| HMSD     | -0.199933025 | 0.49529992 | -3.955954274 | 9.87E-05 | 0.0002  | 0.250004665 |
| WFDC3    | -0.205072155 | 0.75223547 | -3.95578819  | 9.88E-05 | 0.0002  | 0.249385768 |
| CSF1R    | 0.470140998  | 3.96246042 | 3.954648267  | 9.92E-05 | 0.0002  | 0.245138571 |
| SPRED1   | -0.376737867 | 5.30464712 | -3.954544355 | 9.93E-05 | 0.0002  | 0.244751459 |
| IZUMO4   | -0.318380577 | 1.38196624 | -3.95424222  | 9.94E-05 | 0.0002  | 0.243625954 |
| ZBTB18   | -0.229953342 | 4.36122133 | -3.954104735 | 9.95E-05 | 0.0002  | 0.243113822 |
| SPATA1   | -0.272774204 | 2.13147435 | -3.953566359 | 9.97E-05 | 0.0002  | 0.241108526 |
| SH3GLB   | -0.232962393 | 5.49911668 | -3.952897044 | 9.99E-05 | 0.0002  | 0.238615857 |

|         |              |            |              |          |         |             |
|---------|--------------|------------|--------------|----------|---------|-------------|
| LY6D    | 0.448743231  | 0.57612781 | 3.952754964  | 1.00E-04 | 0.0002  | 0.238086768 |
| GPT     | -0.457610118 | 1.93987552 | -3.952470481 | 0.0001   | 0.0002  | 0.237027438 |
| SLAMF7  | 0.758873098  | 1.90297824 | 3.951990692  | 0.0001   | 0.0002  | 0.235241005 |
| AMDHD1  | -0.202092727 | 0.59572197 | -3.951460078 | 0.0001   | 0.0002  | 0.233265551 |
| IFRD1   | -0.304608606 | 3.91885778 | -3.951099006 | 0.000101 | 0.0002  | 0.23192143  |
| ARHGAP  | -0.134289112 | 0.20530439 | -3.950531421 | 0.000101 | 0.0002  | 0.229808768 |
| STRADB  | 0.394794748  | 4.67743428 | 3.950358828  | 0.000101 | 0.0002  | 0.229166394 |
| PAQR5   | -0.2921024   | 0.8537522  | -3.950327895 | 0.000101 | 0.0002  | 0.22905127  |
| CDV3    | -0.337519234 | 6.87276213 | -3.950310876 | 0.000101 | 0.0002  | 0.228987927 |
| SRSF4   | -0.239082809 | 6.45236438 | -3.949533312 | 0.000101 | 0.0002  | 0.226094259 |
| KRT79   | 0.071395751  | 0.08688611 | 3.948710376  | 0.000102 | 0.0002  | 0.223032293 |
| MED28   | -0.226225787 | 4.10079039 | -3.947992273 | 0.000102 | 0.0002  | 0.220360847 |
| CSAG1   | -0.551064585 | 0.5597642  | -3.947548738 | 0.000102 | 0.0002  | 0.218711046 |
| BOC     | -0.547621635 | 3.45802917 | -3.947455686 | 0.000102 | 0.0002  | 0.218364946 |
| DACH2   | -0.286412477 | 0.48682574 | -3.947364434 | 0.000102 | 0.0002  | 0.218025546 |
| HLA-F   | 0.484511253  | 5.25236453 | 3.947327007  | 0.000102 | 0.0002  | 0.217886344 |
| GLOD5   | -0.4304955   | 2.55037291 | -3.946700144 | 0.000102 | 0.0002  | 0.215555024 |
| FCN1    | 0.490915538  | 1.38443477 | 3.946652149  | 0.000102 | 0.0002  | 0.215376542 |
| CBLB    | -0.288257505 | 3.02229922 | -3.946464973 | 0.000102 | 0.0002  | 0.214680501 |
| RAET1E  | 0.343707249  | 1.04254185 | 3.946027428  | 0.000103 | 0.0002  | 0.213053537 |
| SNRPA   | -0.268571259 | 6.45016311 | -3.945794736 | 0.000103 | 0.0002  | 0.212188365 |
| PRAM1   | 0.287557171  | 1.56717394 | 3.945579104  | 0.000103 | 0.0002  | 0.211386662 |
| NLE1    | -0.23581539  | 3.32505561 | -3.945470956 | 0.000103 | 0.0002  | 0.210984591 |
| HINT3   | -0.29460855  | 5.22860881 | -3.945160689 | 0.000103 | 0.0002  | 0.209831135 |
| ZNF439  | -0.257126991 | 2.51117669 | -3.944312656 | 0.000103 | 0.00021 | 0.206678888 |
| TAFA4   | -0.067883579 | 0.08111064 | -3.944291526 | 0.000103 | 0.00021 | 0.206600353 |
| TNS2    | -0.275463033 | 5.61021915 | -3.943764781 | 0.000104 | 0.00021 | 0.204642684 |
| TMEM11  | 0.333969867  | 3.21569878 | 3.943204472  | 0.000104 | 0.00021 | 0.202560529 |
| TEX9    | -0.264068055 | 2.39195804 | -3.942731283 | 0.000104 | 0.00021 | 0.200802322 |
| PRSS21  | 0.200304984  | 0.26476757 | 3.941755254  | 0.000104 | 0.00021 | 0.197176325 |
| PISD    | -0.24686563  | 4.60771165 | -3.941462351 | 0.000105 | 0.00021 | 0.196088332 |
| SCIMP   | 0.336354144  | 1.16757913 | 3.940695774  | 0.000105 | 0.00021 | 0.193241205 |
| PPM1N   | 0.310313901  | 0.95380301 | 3.939598604  | 0.000105 | 0.00021 | 0.189167081 |
| DESI1   | -0.201879175 | 4.31335781 | -3.9394066   | 0.000105 | 0.00021 | 0.188454214 |
| PRR3    | -0.263211996 | 3.72679936 | -3.938976289 | 0.000106 | 0.00021 | 0.186856682 |
| PRPF6   | -0.239250787 | 7.34830978 | -3.938769169 | 0.000106 | 0.00021 | 0.186087804 |
| NFKB2   | 0.285113917  | 5.06682902 | 3.938237164  | 0.000106 | 0.00021 | 0.18411304  |
| SOX8    | 0.374028306  | 1.46017838 | 3.937751492  | 0.000106 | 0.00021 | 0.182310464 |
| TLR6    | 0.232455679  | 0.72838847 | 3.936574869  | 0.000107 | 0.00021 | 0.177944241 |
| BLOC1S1 | -0.292827801 | 4.94922569 | -3.932154161 | 0.000108 | 0.00021 | 0.161550149 |

|          |              |            |              |          |         |             |
|----------|--------------|------------|--------------|----------|---------|-------------|
| CDH1     | -0.388090088 | 8.33725045 | -3.931755668 | 0.000109 | 0.00022 | 0.160073151 |
| SNAI1    | -0.557063465 | 3.41060048 | -3.931427109 | 0.000109 | 0.00022 | 0.158855458 |
| MKI67    | 0.357431107  | 1.34577962 | 3.931221037  | 0.000109 | 0.00022 | 0.158091769 |
| RHOH     | 0.411915238  | 0.99303765 | 3.930936382  | 0.000109 | 0.00022 | 0.157036912 |
| TSPAN4   | -0.279402025 | 5.5339963  | -3.930601731 | 0.000109 | 0.00022 | 0.155796871 |
| AFF2     | 0.319494815  | 0.81508173 | 3.930564087  | 0.000109 | 0.00022 | 0.155657389 |
| GPR171   | 0.416557294  | 1.03763518 | 3.930114009  | 0.000109 | 0.00022 | 0.153989799 |
| ZNF277   | -0.228973726 | 4.21991703 | -3.929356548 | 0.00011  | 0.00022 | 0.1511837   |
| QRFP     | -0.155666235 | 0.70712671 | -3.929145779 | 0.00011  | 0.00022 | 0.150402967 |
| JARID2   | -0.251925635 | 3.12939058 | -3.927647283 | 0.00011  | 0.00022 | 0.144853298 |
| CNNM1    | -0.122688056 | 0.1452562  | -3.9273532   | 0.00011  | 0.00022 | 0.143764384 |
| PNMA3    | -0.378674791 | 1.22801138 | -3.9262337   | 0.000111 | 0.00022 | 0.139619822 |
| PLCG1    | -0.28965116  | 4.75543688 | -3.92566215  | 0.000111 | 0.00022 | 0.13750426  |
| PGLS     | -0.253337648 | 5.98836385 | -3.925358723 | 0.000111 | 0.00022 | 0.136381253 |
| INF2     | 0.485032147  | 5.13703988 | 3.925220626  | 0.000111 | 0.00022 | 0.135870169 |
| TPSD1    | 0.232675003  | 0.27429934 | 3.925035447  | 0.000111 | 0.00022 | 0.135184866 |
| EPM2AIF  | -0.290286468 | 5.03917553 | -3.923972309 | 0.000112 | 0.00022 | 0.131250999 |
| DSTYK    | -0.302106187 | 3.92271815 | -3.92372492  | 0.000112 | 0.00022 | 0.130335735 |
| IARS2    | -0.331895472 | 5.97291341 | -3.923485126 | 0.000112 | 0.00022 | 0.129448619 |
| RGS20    | -0.302225892 | 0.95194952 | -3.922972329 | 0.000112 | 0.00022 | 0.127551692 |
| PIP4K2C  | -0.296740252 | 5.61879016 | -3.921992603 | 0.000113 | 0.00022 | 0.123928124 |
| SMOC1    | -0.677962999 | 2.03480089 | -3.921680834 | 0.000113 | 0.00022 | 0.122775198 |
| TPPP2    | -0.045764746 | 0.05576079 | -3.921494715 | 0.000113 | 0.00022 | 0.122086968 |
| EDC3     | -0.254183609 | 4.30885256 | -3.921471573 | 0.000113 | 0.00022 | 0.122001394 |
| ACHE     | -0.351508086 | 1.16724241 | -3.921421664 | 0.000113 | 0.00022 | 0.121816849 |
| ZNF620   | -0.231245569 | 2.23977127 | -3.921087688 | 0.000113 | 0.00022 | 0.120581963 |
| RDH5     | 0.597483838  | 2.1465527  | 3.920749551  | 0.000113 | 0.00022 | 0.119331786 |
| DNAJC5   | 0.229222964  | 0.49817573 | 3.920411369  | 0.000114 | 0.00022 | 0.118081542 |
| PCNA     | -0.263815247 | 6.94586268 | -3.920369127 | 0.000114 | 0.00022 | 0.117925381 |
| ANGPT1   | -0.468454966 | 1.79199762 | -3.919416018 | 0.000114 | 0.00023 | 0.114402321 |
| USF1     | -0.220203694 | 5.87936433 | -3.918664708 | 0.000114 | 0.00023 | 0.111625722 |
| DCAF5    | -0.246829108 | 4.64948164 | -3.918273322 | 0.000114 | 0.00023 | 0.110179472 |
| C22orf15 | -0.096606735 | 0.17335937 | -3.916856318 | 0.000115 | 0.00023 | 0.104944435 |
| PLCD1    | 0.341355944  | 4.64505302 | 3.916672375  | 0.000115 | 0.00023 | 0.10426499  |
| ATOX7    | -0.135331028 | 0.24994238 | -3.916427981 | 0.000115 | 0.00023 | 0.103362297 |
| ACCS     | -0.349336235 | 3.33427209 | -3.915825343 | 0.000116 | 0.00023 | 0.10113661  |
| CDC42E   | 0.437090733  | 6.27159847 | 3.915530715  | 0.000116 | 0.00023 | 0.10004859  |
| POMZP3   | -0.376349463 | 3.69271082 | -3.914906318 | 0.000116 | 0.00023 | 0.097743018 |
| PI15     | 0.191783731  | 0.23965965 | 3.914093858  | 0.000116 | 0.00023 | 0.094743511 |
| MRPL38   | -0.24316054  | 2.76230692 | -3.913904224 | 0.000116 | 0.00023 | 0.094043486 |

|         |              |            |              |          |         |             |
|---------|--------------|------------|--------------|----------|---------|-------------|
| MRI1    | -0.303139217 | 4.03581663 | -3.913836931 | 0.000116 | 0.00023 | 0.093795081 |
| PRKACA  | -0.237395953 | 5.86752522 | -3.91352478  | 0.000117 | 0.00023 | 0.092642872 |
| OSER1   | -0.234453193 | 5.74688365 | -3.913475851 | 0.000117 | 0.00023 | 0.092462274 |
| ARPP19  | -0.271815516 | 6.16465565 | -3.913190929 | 0.000117 | 0.00023 | 0.091410652 |
| FBXO43  | -0.07749067  | 0.22445189 | -3.912860794 | 0.000117 | 0.00023 | 0.090192241 |
| ANKRD4  | -0.270110853 | 4.67114292 | -3.912575585 | 0.000117 | 0.00023 | 0.089139709 |
| RHBDD1  | -0.249755525 | 3.92229159 | -3.912400719 | 0.000117 | 0.00023 | 0.088494421 |
| ZFP69   | -0.188505028 | 2.23725645 | -3.912212114 | 0.000117 | 0.00023 | 0.087798459 |
| PIK3CB  | -0.340375624 | 4.9703498  | -3.911519015 | 0.000118 | 0.00023 | 0.085241147 |
| RAB6C   | -0.088251755 | 0.15771318 | -3.91127663  | 0.000118 | 0.00023 | 0.084346919 |
| TJP3    | -0.259826617 | 4.68581474 | -3.91067639  | 0.000118 | 0.00023 | 0.082132674 |
| NF2     | -0.2253936   | 4.68573776 | -3.910379264 | 0.000118 | 0.00023 | 0.081036707 |
| MYLK2   | -0.239044995 | 0.53995854 | -3.910270913 | 0.000118 | 0.00023 | 0.08063707  |
| SNAP23  | -0.288782064 | 4.62600938 | -3.909465769 | 0.000118 | 0.00023 | 0.077667694 |
| TRIM62  | -0.211826746 | 2.88867465 | -3.908928907 | 0.000119 | 0.00023 | 0.075688043 |
| GDI1    | -0.190097722 | 6.15737155 | -3.908834955 | 0.000119 | 0.00023 | 0.075341626 |
| RTL8B   | -0.26837765  | 4.53737123 | -3.904496512 | 0.000121 | 0.00024 | 0.059353048 |
| PUM3    | -0.218497508 | 4.43217255 | -3.904476383 | 0.000121 | 0.00024 | 0.059278903 |
| PRRC1   | -0.293491203 | 4.61099675 | -3.904018858 | 0.000121 | 0.00024 | 0.057593702 |
| PPM1D   | -0.261859563 | 3.40545876 | -3.903852887 | 0.000121 | 0.00024 | 0.056982424 |
| MIOS    | -0.230679779 | 3.20364812 | -3.903066899 | 0.000121 | 0.00024 | 0.054087909 |
| OBSL1   | -0.364925355 | 5.73714372 | -3.902787618 | 0.000122 | 0.00024 | 0.053059543 |
| TRIM25  | -0.27802732  | 4.36690895 | -3.902742326 | 0.000122 | 0.00024 | 0.052892773 |
| CRTAC1  | -0.61733084  | 2.87287211 | -3.902678318 | 0.000122 | 0.00024 | 0.052657094 |
| CAPRIN2 | -0.265884517 | 2.73611534 | -3.90262117  | 0.000122 | 0.00024 | 0.052446678 |
| CPNE3   | -0.321425099 | 5.38946758 | -3.902306114 | 0.000122 | 0.00024 | 0.051286701 |
| ELANE   | 0.33803693   | 0.45337195 | 3.902027404  | 0.000122 | 0.00024 | 0.050260613 |
| FBXO32  | 0.41316648   | 3.97336419 | 3.901941314  | 0.000122 | 0.00024 | 0.049943683 |
| GEMIN5  | -0.26931401  | 3.64557887 | -3.900815185 | 0.000123 | 0.00024 | 0.045798513 |
| SH2B3   | -0.317291319 | 4.2559147  | -3.90038916  | 0.000123 | 0.00024 | 0.044230635 |
| SLC5A1  | -0.264143638 | 0.22421886 | -3.900011711 | 0.000123 | 0.00024 | 0.042841655 |
| HMGA1   | 0.534677795  | 6.83140076 | 3.89994229   | 0.000123 | 0.00024 | 0.042586206 |
| DPF2    | -0.251607179 | 4.62156713 | -3.899763426 | 0.000123 | 0.00024 | 0.041928054 |
| AKR1B1  | -0.329650674 | 0.31721795 | -3.899740446 | 0.000123 | 0.00024 | 0.041843497 |
| NOTCH1  | -0.345084086 | 3.64677073 | -3.89956478  | 0.000123 | 0.00024 | 0.041197141 |
| LTBR    | -0.21366871  | 5.72150703 | -3.898927346 | 0.000123 | 0.00024 | 0.038851948 |
| 8-Mar   | -0.284067429 | 4.30289474 | -3.898721798 | 0.000124 | 0.00024 | 0.038095784 |
| SETD2   | -0.305933762 | 4.81476031 | -3.897730819 | 0.000124 | 0.00024 | 0.034450705 |
| KRT16   | 0.421594009  | 0.54486153 | 3.897168361  | 0.000124 | 0.00024 | 0.032382203 |
| ZNF524  | -0.267439506 | 5.71066271 | -3.894886583 | 0.000125 | 0.00025 | 0.023993433 |

|         |              |            |              |          |         |             |
|---------|--------------|------------|--------------|----------|---------|-------------|
| HCRTR1  | -0.105220875 | 0.34229202 | -3.894183404 | 0.000126 | 0.00025 | 0.021409129 |
| RAB35   | -0.254546104 | 4.61843043 | -3.894047916 | 0.000126 | 0.00025 | 0.020911237 |
| OPA1    | -0.28264046  | 4.33484586 | -3.893794236 | 0.000126 | 0.00025 | 0.019979049 |
| FCRL5   | 0.38064487   | 0.48768273 | 3.892790903  | 0.000126 | 0.00025 | 0.016292676 |
| ZBTB8A  | -0.226762447 | 2.73674251 | -3.892612632 | 0.000127 | 0.00025 | 0.015637772 |
| NEK4    | -0.34568961  | 3.49035408 | -3.89170331  | 0.000127 | 0.00025 | 0.012297672 |
| KIF12   | -0.543846207 | 4.04687058 | -3.891604082 | 0.000127 | 0.00025 | 0.011933232 |
| GTF2H3  | -0.306483968 | 4.23075263 | -3.891179073 | 0.000127 | 0.00025 | 0.010372372 |
| CAPN10  | -0.235258331 | 3.1781604  | -3.891114552 | 0.000127 | 0.00025 | 0.010135427 |
| ZBTB6   | -0.297239008 | 3.30825943 | -3.890808475 | 0.000127 | 0.00025 | 0.009011459 |
| FZD2    | -0.414563265 | 2.9822191  | -3.890738451 | 0.000127 | 0.00025 | 0.00875433  |
| SNX21   | -0.226282356 | 3.69812486 | -3.890695766 | 0.000127 | 0.00025 | 0.008597594 |
| SERINC5 | 0.409824523  | 3.67234006 | 3.890000869  | 0.000128 | 0.00025 | 0.006046165 |
| LDLRAD1 | 0.316287845  | 2.67073611 | 3.889488527  | 0.000128 | 0.00025 | 0.004165277 |
| SFTA2   | 0.651353323  | 2.6081655  | 3.888335601  | 0.000129 | 0.00025 | -6.65E-05   |
| ZNF75D  | -0.353669983 | 3.71618413 | -3.888328453 | 0.000129 | 0.00025 | -9.27E-05   |
| FNDC4   | 0.712021263  | 4.7734372  | 3.888191438  | 0.000129 | 0.00025 | -0.00059555 |
| WDR46   | -0.255817744 | 5.66977606 | -3.887989207 | 0.000129 | 0.00025 | -0.00133769 |
| CRAMP1  | -0.256777941 | 2.79739712 | -3.887910875 | 0.000129 | 0.00025 | -0.00162514 |
| RNF148  | -0.076263509 | 0.18821529 | -3.887832428 | 0.000129 | 0.00025 | -0.00191301 |
| BCL11A  | -0.272470527 | 1.16769643 | -3.887802266 | 0.000129 | 0.00025 | -0.00202369 |
| UHRF1   | 0.294281381  | 1.29623002 | 3.887772285  | 0.000129 | 0.00025 | -0.00213371 |
| RASSF3  | -0.333116158 | 4.18039877 | -3.88701729  | 0.000129 | 0.00025 | -0.00490393 |
| AOPEP   | -0.350879324 | 3.72283932 | -3.886830651 | 0.000129 | 0.00025 | -0.00558866 |
| NRCAM   | 0.5366086    | 4.2846029  | 3.886289799  | 0.00013  | 0.00025 | -0.00757278 |
| DBF4B   | -0.258569657 | 2.09213647 | -3.886077899 | 0.00013  | 0.00025 | -0.00835006 |
| SMARCA4 | -0.305708956 | 5.50793684 | -3.885697957 | 0.00013  | 0.00025 | -0.00974366 |
| RIPK2   | 0.252061304  | 3.803419   | 3.885523227  | 0.00013  | 0.00025 | -0.01038451 |
| SLC26A8 | -0.318320941 | 0.77403158 | -3.885403346 | 0.00013  | 0.00025 | -0.01082419 |
| ARHGEF  | -0.261286917 | 4.15936169 | -3.885304333 | 0.00013  | 0.00025 | -0.01118731 |
| PCDH17  | -0.370962693 | 2.76272834 | -3.885214919 | 0.00013  | 0.00025 | -0.01151523 |
| KRT13   | 0.407767458  | 0.7485588  | 3.885155885  | 0.00013  | 0.00025 | -0.01173173 |
| ZBP1    | 0.377143094  | 0.69625426 | 3.884687549  | 0.00013  | 0.00026 | -0.01344917 |
| BECN1   | -0.358607412 | 4.49232304 | -3.884341171 | 0.000131 | 0.00026 | -0.01471926 |
| KRT83   | -0.60597936  | 2.40705552 | -3.88408859  | 0.000131 | 0.00026 | -0.01564535 |
| XG      | 0.250011778  | 0.55584273 | 3.882707765  | 0.000132 | 0.00026 | -0.02070722 |
| CENPN   | -0.214920153 | 1.93379888 | -3.882231484 | 0.000132 | 0.00026 | -0.02245282 |
| PDE3B   | 0.175794751  | 0.41030033 | 3.881099601  | 0.000132 | 0.00026 | -0.02660048 |
| CREB1   | -0.292880744 | 3.83619823 | -3.880645697 | 0.000133 | 0.00026 | -0.02826345 |
| RNF41   | -0.262150426 | 4.69511877 | -3.880333626 | 0.000133 | 0.00026 | -0.02940669 |

|          |              |            |              |          |         |             |
|----------|--------------|------------|--------------|----------|---------|-------------|
| MAP4K1   | 0.500502287  | 2.30233928 | 3.880231766  | 0.000133 | 0.00026 | -0.02977983 |
| ZNF707   | -0.224363609 | 2.70539097 | -3.879759928 | 0.000133 | 0.00026 | -0.03150816 |
| DDI2     | -0.246437823 | 3.31358705 | -3.879564778 | 0.000133 | 0.00026 | -0.03222294 |
| TMEM20   | 0.577872425  | 1.77520453 | 3.876530458  | 0.000135 | 0.00026 | -0.04333263 |
| HSD17B1  | -0.279632096 | 4.79063748 | -3.875204586 | 0.000135 | 0.00026 | -0.04818468 |
| CARD17   | 0.152347298  | 0.239548   | 3.874829511  | 0.000136 | 0.00026 | -0.04955701 |
| ZNF275   | -0.331587208 | 3.34305851 | -3.873936194 | 0.000136 | 0.00027 | -0.05282501 |
| MANBA    | -0.271608234 | 4.31742997 | -3.871860296 | 0.000137 | 0.00027 | -0.06041662 |
| CRISPLC1 | 0.494233258  | 2.90993711 | 3.871642797  | 0.000137 | 0.00027 | -0.06121181 |
| CSPP1    | -0.235853553 | 2.40974641 | -3.87163923  | 0.000137 | 0.00027 | -0.06122485 |
| IL22RA2  | 0.222714491  | 0.28048894 | 3.87077534   | 0.000138 | 0.00027 | -0.06438289 |
| PPP1R15  | 0.346358783  | 4.47551588 | 3.870432081  | 0.000138 | 0.00027 | -0.06563754 |
| SLC7A1C  | -0.272964033 | 0.45201437 | -3.870168666 | 0.000138 | 0.00027 | -0.06660028 |
| LGALS2   | 0.546146334  | 1.94629053 | 3.869626599  | 0.000138 | 0.00027 | -0.06858127 |
| NOCT     | -0.262777898 | 1.81097946 | -3.868578009 | 0.000139 | 0.00027 | -0.07241265 |
| LAT2     | 0.39772652   | 2.47495063 | 3.868410886  | 0.000139 | 0.00027 | -0.0730232  |
| DDB2     | 0.297353447  | 4.18994654 | 3.868140339  | 0.000139 | 0.00027 | -0.07401155 |
| SRSF12   | -0.19824962  | 1.58408044 | -3.867222727 | 0.00014  | 0.00027 | -0.07736326 |
| ECD      | -0.250455168 | 4.80313914 | -3.866738759 | 0.00014  | 0.00027 | -0.07913074 |
| CALHM2   | -0.329498125 | 3.59939333 | -3.865194965 | 0.000141 | 0.00027 | -0.08476745 |
| ZNF146   | -0.303484347 | 5.71753452 | -3.864231872 | 0.000141 | 0.00028 | -0.08828289 |
| APH1B    | -0.301778475 | 4.60751233 | -3.863494588 | 0.000142 | 0.00028 | -0.09097356 |
| ROR2     | -0.60242283  | 2.32036566 | -3.86336061  | 0.000142 | 0.00028 | -0.09146246 |
| MS4A4E   | 0.201755571  | 0.60224031 | 3.862874654  | 0.000142 | 0.00028 | -0.09323562 |
| TRMT2A   | -0.252304689 | 4.76366879 | -3.862180386 | 0.000142 | 0.00028 | -0.09576853 |
| EDEM3    | -0.315739587 | 3.88521057 | -3.861917099 | 0.000143 | 0.00028 | -0.09672898 |
| AP4M1    | -0.229764774 | 3.91295847 | -3.861868177 | 0.000143 | 0.00028 | -0.09690743 |
| DHX15    | -0.307350132 | 4.96528305 | -3.861526342 | 0.000143 | 0.00028 | -0.09815432 |
| RPL35    | -0.301527835 | 9.6954323  | -3.861144917 | 0.000143 | 0.00028 | -0.09954549 |
| KCTD11   | -0.266134359 | 5.17319228 | -3.86054006  | 0.000143 | 0.00028 | -0.10175135 |
| RECQL4   | -0.252923054 | 2.85657727 | -3.859648871 | 0.000144 | 0.00028 | -0.10500086 |
| CBFA2T3  | -0.254081931 | 3.70752733 | -3.859636369 | 0.000144 | 0.00028 | -0.10504645 |
| DHX33    | -0.216995229 | 3.29521768 | -3.859318753 | 0.000144 | 0.00028 | -0.1062044  |
| PRRX2    | 0.489187394  | 2.33868038 | 3.859270352  | 0.000144 | 0.00028 | -0.10638085 |
| ELF2     | -0.256835697 | 3.62521188 | -3.859125612 | 0.000144 | 0.00028 | -0.1069085  |
| SP110    | 0.223305387  | 1.74730428 | 3.858240992  | 0.000145 | 0.00028 | -0.11013302 |
| CEP72    | -0.222059916 | 1.85436234 | -3.858125239 | 0.000145 | 0.00028 | -0.1105549  |
| BCL2L15  | -0.068585618 | 0.20067688 | -3.85732189  | 0.000145 | 0.00028 | -0.11348253 |
| C12orf66 | -0.222620209 | 2.59175346 | -3.857091403 | 0.000145 | 0.00028 | -0.11432239 |
| TRAM2    | -0.395254464 | 4.04043961 | -3.856868052 | 0.000145 | 0.00028 | -0.1151362  |

|         |              |            |              |          |         |             |
|---------|--------------|------------|--------------|----------|---------|-------------|
| GCA     | -0.250897695 | 4.1486297  | -3.856071876 | 0.000146 | 0.00028 | -0.11803685 |
| MME     | 0.402946109  | 0.74738172 | 3.855094414  | 0.000146 | 0.00028 | -0.12159724 |
| PTPRZ1  | 0.058872584  | 0.0717137  | 3.85479083   | 0.000147 | 0.00028 | -0.12270287 |
| SLC7A11 | -0.50204453  | 1.82631967 | -3.854561855 | 0.000147 | 0.00029 | -0.12353673 |
| STBD1   | 0.240414288  | 1.65949426 | 3.854533924  | 0.000147 | 0.00029 | -0.12363845 |
| HCST    | 0.522703619  | 3.6806127  | 3.854283273  | 0.000147 | 0.00029 | -0.12455119 |
| PPBP    | 0.542000782  | 0.98412243 | 3.854127978  | 0.000147 | 0.00029 | -0.12511667 |
| ZDHHC1  | -0.152565479 | 0.46279213 | -3.854095701 | 0.000147 | 0.00029 | -0.1252342  |
| F8A1    | -0.353197546 | 4.23788677 | -3.853681583 | 0.000147 | 0.00029 | -0.12674203 |
| CD3D    | 0.740719632  | 2.888877   | 3.853480499  | 0.000147 | 0.00029 | -0.12747413 |
| SLC7A9  | -0.165920343 | 0.58782961 | -3.852982808 | 0.000148 | 0.00029 | -0.12928598 |
| KRT71   | -0.116147101 | 0.13601448 | -3.85179972  | 0.000148 | 0.00029 | -0.13359218 |
| BORA    | -0.201828469 | 1.44525008 | -3.851395437 | 0.000148 | 0.00029 | -0.13506342 |
| SPAG9   | -0.35548609  | 4.89057246 | -3.85112182  | 0.000149 | 0.00029 | -0.13605907 |
| TSPAN6  | -0.327835345 | 5.2293864  | -3.850779328 | 0.000149 | 0.00029 | -0.13730525 |
| LRP5    | -0.346006861 | 5.45900416 | -3.850663684 | 0.000149 | 0.00029 | -0.13772601 |
| KPNA4   | -0.229302925 | 4.73628335 | -3.850146914 | 0.000149 | 0.00029 | -0.13960609 |
| IL3RA   | -0.285075203 | 4.54569033 | -3.849333381 | 0.00015  | 0.00029 | -0.14256537 |
| GRK1    | -0.349464202 | 1.24210985 | -3.848651479 | 0.00015  | 0.00029 | -0.1450454  |
| STX7    | -0.223716719 | 3.77161569 | -3.846870605 | 0.000151 | 0.00029 | -0.15152049 |
| KLF3    | -0.331584336 | 5.05898957 | -3.846779518 | 0.000151 | 0.00029 | -0.1518516  |
| KRT2    | -0.079167999 | 0.06570918 | -3.846674318 | 0.000151 | 0.00029 | -0.152234   |
| CENPC   | -0.282257108 | 3.30793168 | -3.846086851 | 0.000152 | 0.00029 | -0.1543693  |
| ILRUN   | -0.245620969 | 6.74913382 | -3.845845298 | 0.000152 | 0.00029 | -0.15524719 |
| KLF8    | 0.325355784  | 2.04006313 | 3.845093687  | 0.000152 | 0.0003  | -0.15797853 |
| USP50   | -0.053464961 | 0.14447702 | -3.844538483 | 0.000152 | 0.0003  | -0.15999582 |
| APOL6   | 0.438008491  | 4.34829839 | 3.844111557  | 0.000153 | 0.0003  | -0.16154685 |
| DPY19L3 | -0.311110432 | 3.49516862 | -3.843854573 | 0.000153 | 0.0003  | -0.1624804  |
| ADAM33  | -0.321577038 | 1.01738086 | -3.842151052 | 0.000154 | 0.0003  | -0.16866742 |
| SLC35F3 | -0.555941027 | 1.76192817 | -3.841868227 | 0.000154 | 0.0003  | -0.16969437 |
| ZNF302  | -0.274067547 | 4.25182521 | -3.838905832 | 0.000156 | 0.0003  | -0.18044697 |
| ZNF214  | -0.280074789 | 2.40006125 | -3.838159216 | 0.000156 | 0.0003  | -0.18315579 |
| SOCS7   | -0.321852045 | 3.38831351 | -3.837246012 | 0.000157 | 0.0003  | -0.18646838 |
| INPP5D  | 0.43775353   | 2.99565476 | 3.836766496  | 0.000157 | 0.0003  | -0.18820752 |
| SLC37A1 | -0.231087169 | 4.02083588 | -3.835980802 | 0.000158 | 0.00031 | -0.19105669 |
| ZNF257  | -0.191722732 | 1.18971168 | -3.835377586 | 0.000158 | 0.00031 | -0.19324379 |
| BRD8    | -0.269070142 | 4.59050969 | -3.834751356 | 0.000158 | 0.00031 | -0.19551401 |
| MDC1    | -0.279297552 | 3.84634628 | -3.834304902 | 0.000159 | 0.00031 | -0.1971323  |
| LSM12   | -0.24657034  | 3.29972004 | -3.834261465 | 0.000159 | 0.00031 | -0.19728974 |
| PTX4    | -0.063288011 | 0.09157056 | -3.834190384 | 0.000159 | 0.00031 | -0.19754738 |

|          |              |            |              |          |         |             |
|----------|--------------|------------|--------------|----------|---------|-------------|
| PFDN2    | -0.229904677 | 7.44667003 | -3.833904691 | 0.000159 | 0.00031 | -0.19858283 |
| VSX1     | -0.21088417  | 0.28375076 | -3.833574696 | 0.000159 | 0.00031 | -0.19977876 |
| PHLPP2   | -0.289435989 | 2.39188555 | -3.8327818   | 0.000159 | 0.00031 | -0.20265192 |
| SPRY3    | -0.126763778 | 0.84714525 | -3.832748924 | 0.00016  | 0.00031 | -0.20277105 |
| SOX13    | -0.265088781 | 3.47211049 | -3.831247654 | 0.00016  | 0.00031 | -0.2082096  |
| SIGLEC10 | 0.233379485  | 0.44026192 | 3.830843885  | 0.000161 | 0.00031 | -0.20967198 |
| HHATL    | -0.871633595 | 5.33732259 | -3.830755555 | 0.000161 | 0.00031 | -0.20999188 |
| SMAP1    | -0.221078899 | 3.39922483 | -3.830664708 | 0.000161 | 0.00031 | -0.21032088 |
| ACSM6    | -0.245145784 | 0.53013621 | -3.8306149   | 0.000161 | 0.00031 | -0.21050126 |
| ROM1     | -0.300855875 | 2.919816   | -3.830408442 | 0.000161 | 0.00031 | -0.21124892 |
| ZNF239   | -0.264115806 | 2.59349873 | -3.830123619 | 0.000161 | 0.00031 | -0.21228032 |
| SCX      | -0.632087961 | 6.41196354 | -3.829651919 | 0.000161 | 0.00031 | -0.21398827 |
| CSNK1A   | -0.028970893 | 0.04640295 | -3.829637813 | 0.000161 | 0.00031 | -0.21403935 |
| RABL2A   | -0.263857156 | 2.48247584 | -3.82948847  | 0.000162 | 0.00031 | -0.21458005 |
| WFDC8    | -0.28662234  | 0.23624488 | -3.829146691 | 0.000162 | 0.00031 | -0.21581742 |
| ARID1B   | -0.304036733 | 4.31866878 | -3.827446019 | 0.000163 | 0.00031 | -0.22197303 |
| SIX2     | -0.356034044 | 0.64925784 | -3.826156703 | 0.000164 | 0.00032 | -0.2266381  |
| DAZAP1   | -0.179016264 | 4.79339509 | -3.826113364 | 0.000164 | 0.00032 | -0.22679489 |
| FAM227   | -0.209402374 | 0.97897699 | -3.825403412 | 0.000164 | 0.00032 | -0.22936305 |
| HSD17B   | -0.556648753 | 5.80947709 | -3.82513238  | 0.000164 | 0.00032 | -0.23034336 |
| CDKL1    | -0.211114983 | 0.79963813 | -3.824996007 | 0.000164 | 0.00032 | -0.2308366  |
| RGS1     | 0.758695332  | 4.14783768 | 3.824975355  | 0.000164 | 0.00032 | -0.23091129 |
| DHX38    | -0.256874417 | 4.63961223 | -3.824254113 | 0.000165 | 0.00032 | -0.2335196  |
| CFI      | 0.678263933  | 5.70962688 | 3.824167812  | 0.000165 | 0.00032 | -0.23383167 |
| ASAP2    | 0.594660865  | 3.69873409 | 3.824041873  | 0.000165 | 0.00032 | -0.23428706 |
| GRIN3A   | -0.074384855 | 0.27862791 | -3.823945207 | 0.000165 | 0.00032 | -0.23463659 |
| BCAM     | -0.437439869 | 7.51209191 | -3.823836043 | 0.000165 | 0.00032 | -0.23503131 |
| ENO1     | -0.241517063 | 8.9453128  | -3.820912388 | 0.000167 | 0.00032 | -0.24559892 |
| GPR108   | -0.268374932 | 6.53212913 | -3.820673871 | 0.000167 | 0.00032 | -0.24646073 |
| ALG10    | -0.209815427 | 1.60925698 | -3.819896022 | 0.000168 | 0.00032 | -0.24927091 |
| ADGRG6   | -0.296408212 | 1.11044705 | -3.819564348 | 0.000168 | 0.00032 | -0.25046902 |
| TNS3     | -0.413932616 | 4.42404983 | -3.81909347  | 0.000168 | 0.00032 | -0.25216981 |
| ARID1A   | -0.361003536 | 5.40126587 | -3.818948172 | 0.000168 | 0.00032 | -0.25269458 |
| ZKSCAN   | -0.21258712  | 2.30223211 | -3.817721599 | 0.000169 | 0.00033 | -0.25712387 |
| TEX10    | -0.22842788  | 3.46415151 | -3.817327177 | 0.000169 | 0.00033 | -0.25854791 |
| FNBP1L   | -0.356605907 | 5.54469322 | -3.817033394 | 0.000169 | 0.00033 | -0.25960851 |
| FAM228E  | -0.205234466 | 2.62740471 | -3.816794456 | 0.00017  | 0.00033 | -0.26047105 |
| COL1A2   | 0.755205286  | 6.38206622 | 3.816384627  | 0.00017  | 0.00033 | -0.26195039 |
| SEC31A   | -0.275789569 | 6.09583603 | -3.815941033 | 0.00017  | 0.00033 | -0.26355145 |
| AQR      | -0.254634184 | 3.6204349  | -3.815793149 | 0.00017  | 0.00033 | -0.26408516 |



|        |              |            |              |          |         |             |
|--------|--------------|------------|--------------|----------|---------|-------------|
| WNT3A  | -0.255568751 | 0.20025853 | -3.815409504 | 0.00017  | 0.00033 | -0.26546967 |
| SRXN1  | -0.293396981 | 1.34801787 | -3.815056899 | 0.000171 | 0.00033 | -0.26674204 |
| KLRC1  | 0.242802504  | 0.60425703 | 3.814144659  | 0.000171 | 0.00033 | -0.27003337 |
| POC5   | -0.185222315 | 3.05488025 | -3.813189788 | 0.000172 | 0.00033 | -0.27347776 |
| TMEM62 | -0.201839328 | 3.94581656 | -3.812870573 | 0.000172 | 0.00033 | -0.27462906 |
| TET1   | -0.161726671 | 0.78536067 | -3.812215028 | 0.000173 | 0.00033 | -0.2769931  |
| ADGRF2 | 0.191502681  | 0.21543762 | 3.8116434    | 0.000173 | 0.00033 | -0.27905422 |
| ZSCAN9 | -0.21940516  | 3.29253466 | -3.810039156 | 0.000174 | 0.00034 | -0.28483719 |
| RAB36  | -0.395944952 | 4.7846911  | -3.808589229 | 0.000175 | 0.00034 | -0.29006201 |
| CMTM3  | 0.405626482  | 5.13767548 | 3.806834128  | 0.000176 | 0.00034 | -0.29638415 |
| CD63   | -0.247733683 | 10.2804333 | -3.80647027  | 0.000176 | 0.00034 | -0.2976945  |
| TBC1D9 | -0.255659412 | 5.47002245 | -3.806420073 | 0.000176 | 0.00034 | -0.29787526 |
| MTRR   | -0.283574317 | 3.51711759 | -3.805714182 | 0.000177 | 0.00034 | -0.300417   |
| HERPUD | -0.231013082 | 4.84355644 | -3.804988151 | 0.000177 | 0.00034 | -0.30303083 |
| C1QTNF | 0.326798916  | 2.40799175 | 3.803866494  | 0.000178 | 0.00034 | -0.3070681  |
| MTMR12 | -0.423578157 | 4.59064178 | -3.803032348 | 0.000179 | 0.00034 | -0.31006982 |
| DNAJC1 | -0.369147411 | 3.92619308 | -3.802675942 | 0.000179 | 0.00034 | -0.31135218 |
| SMAGP  | -0.274035999 | 2.64689827 | -3.802477198 | 0.000179 | 0.00034 | -0.31206723 |
| MMP25  | 0.204920993  | 0.90307941 | 3.801938287  | 0.000179 | 0.00035 | -0.31400596 |
| FAM120 | -0.255622067 | 6.29703566 | -3.801804751 | 0.00018  | 0.00035 | -0.31448632 |
| FAM71D | -0.04360536  | 0.14665606 | -3.801509614 | 0.00018  | 0.00035 | -0.31554794 |
| USP31  | 0.225062392  | 1.84975809 | 3.801259039  | 0.00018  | 0.00035 | -0.31644921 |
| GOLGA8 | -0.17799982  | 0.76520925 | -3.801239511 | 0.00018  | 0.00035 | -0.31651944 |
| NCAPD2 | -0.278149187 | 4.53937533 | -3.801130923 | 0.00018  | 0.00035 | -0.31691    |
| PUS10  | -0.252626233 | 2.61611814 | -3.799528889 | 0.000181 | 0.00035 | -0.32267078 |
| CXCL13 | 1.032470214  | 1.89573292 | 3.799513913  | 0.000181 | 0.00035 | -0.32272462 |
| ZNF766 | -0.222337499 | 3.2451006  | -3.798696836 | 0.000182 | 0.00035 | -0.32566192 |
| PSD3   | 0.519917222  | 4.14452473 | 3.798466241  | 0.000182 | 0.00035 | -0.32649078 |
| TMEM10 | -0.252785306 | 4.02600702 | -3.798126696 | 0.000182 | 0.00035 | -0.32771117 |
| MPHOSF | -0.265586516 | 5.61501914 | -3.798071537 | 0.000182 | 0.00035 | -0.32790941 |
| PLPP5  | -0.298244067 | 4.91177188 | -3.797694511 | 0.000182 | 0.00035 | -0.32926438 |
| EYA2   | -0.514485394 | 3.89133694 | -3.797438586 | 0.000183 | 0.00035 | -0.33018407 |
| INSIG2 | -0.248914467 | 4.54707253 | -3.797354884 | 0.000183 | 0.00035 | -0.33048485 |
| CELF4  | 0.388481904  | 1.44948027 | 3.79680994   | 0.000183 | 0.00035 | -0.33244293 |
| PNOC   | 0.410511146  | 0.6193453  | 3.796428021  | 0.000183 | 0.00035 | -0.33381508 |
| INVS   | -0.246133913 | 2.47135341 | -3.795509831 | 0.000184 | 0.00035 | -0.33711343 |
| EHD3   | -0.307327938 | 2.72772159 | -3.7943956   | 0.000185 | 0.00035 | -0.34111505 |
| TAF3   | -0.309942706 | 0.84587557 | -3.793762638 | 0.000185 | 0.00036 | -0.34338779 |
| IL23R  | 0.035899161  | 0.04394928 | 3.793678061  | 0.000185 | 0.00036 | -0.34369145 |
| VAV2   | -0.298440413 | 5.07136857 | -3.792090295 | 0.000186 | 0.00036 | -0.34939093 |

|          |              |            |              |          |         |             |
|----------|--------------|------------|--------------|----------|---------|-------------|
| TAF3     | -0.204900783 | 3.22638001 | -3.791452424 | 0.000187 | 0.00036 | -0.35168005 |
| LHFPL6   | -0.435985955 | 5.45675039 | -3.791276199 | 0.000187 | 0.00036 | -0.35231241 |
| DUSP26   | -0.275374059 | 0.84931337 | -3.790761476 | 0.000187 | 0.00036 | -0.35415926 |
| TEX29    | -0.13764942  | 0.4862066  | -3.790242113 | 0.000188 | 0.00036 | -0.35602253 |
| SCN3A    | -0.177173626 | 0.36698734 | -3.790140555 | 0.000188 | 0.00036 | -0.35638685 |
| GGA1     | -0.22791182  | 4.60625575 | -3.789769499 | 0.000188 | 0.00036 | -0.35771789 |
| HERC3    | -0.351849611 | 3.71569794 | -3.788892553 | 0.000189 | 0.00036 | -0.36086316 |
| MELTF    | 0.473639022  | 2.97900322 | 3.78888586   | 0.000189 | 0.00036 | -0.36088716 |
| POSTN    | 0.839194874  | 4.50943883 | 3.788877393  | 0.000189 | 0.00036 | -0.36091752 |
| SLC35F4  | -0.180724873 | 0.23584264 | -3.788608233 | 0.000189 | 0.00036 | -0.36188277 |
| CPVL     | -0.522656788 | 7.24567111 | -3.788396071 | 0.000189 | 0.00036 | -0.36264356 |
| ZXDC     | -0.254741979 | 3.60305128 | -3.788065075 | 0.000189 | 0.00036 | -0.36383041 |
| TMEM65   | -0.281778254 | 3.29424867 | -3.787384474 | 0.00019  | 0.00036 | -0.36627054 |
| MYO7B    | -0.174315494 | 0.72009609 | -3.787336796 | 0.00019  | 0.00036 | -0.36644147 |
| L3HYPDI  | -0.281628845 | 2.56073809 | -3.787140261 | 0.00019  | 0.00036 | -0.36714602 |
| WNK2     | -0.242406135 | 0.74120255 | -3.786339688 | 0.00019  | 0.00036 | -0.37001561 |
| CTDNEP   | -0.18279685  | 6.88606135 | -3.786277239 | 0.000191 | 0.00036 | -0.37023944 |
| SCNN1B   | -0.524110857 | 2.46395927 | -3.784381307 | 0.000192 | 0.00037 | -0.37703301 |
| CDC40    | -0.326027641 | 3.46101032 | -3.784306305 | 0.000192 | 0.00037 | -0.3773017  |
| FNDC8    | -0.065436709 | 0.16397593 | -3.782757326 | 0.000193 | 0.00037 | -0.3828497  |
| GABRR2   | -0.12901113  | 0.37966864 | -3.782571103 | 0.000193 | 0.00037 | -0.38351656 |
| KIAA035  | -0.280551276 | 4.2640091  | -3.78246617  | 0.000193 | 0.00037 | -0.38389231 |
| SCG2     | 0.287072054  | 0.84659611 | 3.782339121  | 0.000193 | 0.00037 | -0.38434724 |
| C8A      | -0.377201894 | 0.47317723 | -3.782067657 | 0.000194 | 0.00037 | -0.38531924 |
| C1orf226 | 0.441503666  | 2.55494971 | 3.781519763  | 0.000194 | 0.00037 | -0.38728084 |
| LY86     | 0.486581315  | 3.08344962 | 3.781508795  | 0.000194 | 0.00037 | -0.3873201  |
| GDAP2    | -0.198438995 | 2.61117577 | -3.781227751 | 0.000194 | 0.00037 | -0.38832621 |
| NAPG     | -0.255751979 | 4.24688439 | -3.781211295 | 0.000194 | 0.00037 | -0.38838511 |
| IP6K1    | -0.242599658 | 5.04201617 | -3.780229316 | 0.000195 | 0.00037 | -0.39189995 |
| CCDC15   | -0.141924264 | 0.93344645 | -3.77878686  | 0.000196 | 0.00037 | -0.39706151 |
| GPR63    | -0.141617333 | 0.54028132 | -3.778630721 | 0.000196 | 0.00038 | -0.39762011 |
| CYTH1    | -0.25884012  | 4.78999349 | -3.778479511 | 0.000196 | 0.00038 | -0.39816107 |
| TRIM74   | -0.153920854 | 0.89052712 | -3.778404813 | 0.000196 | 0.00038 | -0.39842829 |
| CRIP2    | -0.303701817 | 7.10517438 | -3.778313968 | 0.000196 | 0.00038 | -0.39875328 |
| KRTAP2   | -0.395520113 | 0.64097001 | 3.77821473   | 0.000196 | 0.00038 | -0.39910828 |
| RNF38    | -0.336981208 | 4.86541363 | -3.7781614   | 0.000197 | 0.00038 | -0.39929905 |
| PRPF4    | -0.240464142 | 4.42732061 | -3.777839973 | 0.000197 | 0.00038 | -0.40044881 |
| LEPR     | 0.380835906  | 1.90203759 | 3.777504337  | 0.000197 | 0.00038 | -0.40164929 |
| MISP3    | -0.322740182 | 3.84948805 | -3.77639442  | 0.000198 | 0.00038 | -0.40561852 |
| ENO2     | -0.345438705 | 5.37369271 | -3.776199937 | 0.000198 | 0.00038 | -0.40631391 |

|         |              |            |              |          |         |             |
|---------|--------------|------------|--------------|----------|---------|-------------|
| KIAA089 | -0.388514791 | 3.23981104 | -3.776095162 | 0.000198 | 0.00038 | -0.40668853 |
| SNX13   | -0.284109908 | 3.45313815 | -3.775796799 | 0.000198 | 0.00038 | -0.40775526 |
| CARD9   | 0.246435794  | 1.03637369 | 3.774061332  | 0.0002   | 0.00038 | -0.41395858 |
| PTPN13  | -0.46559246  | 4.57954376 | -3.773568968 | 0.0002   | 0.00038 | -0.41571804 |
| VCPKMT  | -0.231978979 | 3.45381364 | -3.773419835 | 0.0002   | 0.00038 | -0.41625092 |
| XRN2    | -0.331454854 | 6.14537103 | -3.773355837 | 0.0002   | 0.00038 | -0.41647959 |
| NSD1    | -0.303002769 | 4.10192905 | -3.773162245 | 0.0002   | 0.00038 | -0.4171713  |
| IL18RAP | 0.164547439  | 0.466055   | 3.773121427  | 0.0002   | 0.00038 | -0.41731714 |
| MARCKS  | -0.371383722 | 5.64572612 | -3.773008549 | 0.0002   | 0.00038 | -0.41772044 |
| ITGB5   | -0.376538424 | 5.74906343 | -3.772881497 | 0.0002   | 0.00038 | -0.41817436 |
| H2AFY   | -0.192510046 | 4.83390139 | -3.772582106 | 0.000201 | 0.00038 | -0.41924396 |
| CILP    | -0.699307062 | 1.53488611 | -3.772457396 | 0.000201 | 0.00038 | -0.41968947 |
| ACTR8   | -0.240114579 | 4.14470864 | -3.772038243 | 0.000201 | 0.00038 | -0.42118676 |
| PPP1R1  | -0.281629461 | 6.32560566 | -3.771403585 | 0.000202 | 0.00038 | -0.42345358 |
| FEZ2    | -0.261860661 | 3.79323745 | -3.770419629 | 0.000202 | 0.00039 | -0.42696731 |
| ARPC2   | -0.257677554 | 6.32060333 | -3.769991349 | 0.000203 | 0.00039 | -0.42849646 |
| SRCIN1  | 0.434443171  | 2.59157127 | 3.768866182  | 0.000204 | 0.00039 | -0.43251305 |
| MBD5    | -0.226012194 | 2.18419689 | -3.768180623 | 0.000204 | 0.00039 | -0.43495982 |
| KCNE5   | 0.164718467  | 0.33014342 | 3.767885196  | 0.000204 | 0.00039 | -0.43601408 |
| ARSE    | 0.235814615  | 0.66389053 | 3.767507161  | 0.000205 | 0.00039 | -0.43736303 |
| AKR7A3  | -0.295201317 | 0.98908758 | -3.76664344  | 0.000205 | 0.00039 | -0.44044459 |
| CKLF-CA | 0.169406801  | 0.75755598 | 3.766238972  | 0.000206 | 0.00039 | -0.44188743 |
| C3orf38 | -0.226561161 | 4.02470827 | -3.766067794 | 0.000206 | 0.00039 | -0.44249802 |
| RBBP6   | -0.260815299 | 4.27510112 | -3.765279126 | 0.000206 | 0.00039 | -0.44531088 |
| UBE2B   | -0.221768706 | 5.86881097 | -3.765205332 | 0.000206 | 0.00039 | -0.44557405 |
| RBM39   | -0.27257213  | 6.12399277 | -3.764851559 | 0.000207 | 0.00039 | -0.44683562 |
| SLBP    | -0.225383076 | 6.01967285 | -3.764719621 | 0.000207 | 0.00039 | -0.44730609 |
| BRCA1   | -0.312936388 | 2.00965168 | -3.764716045 | 0.000207 | 0.00039 | -0.44731884 |
| ITGA5   | -0.32605429  | 4.50723675 | -3.764543463 | 0.000207 | 0.00039 | -0.44793422 |
| LTC4S   | -0.123703233 | 0.35976459 | -3.764409378 | 0.000207 | 0.00039 | -0.44841231 |
| ASB14   | -0.102963733 | 0.70078447 | -3.763801359 | 0.000208 | 0.0004  | -0.45058006 |
| SLC9A7  | -0.26194721  | 3.88638451 | -3.763643811 | 0.000208 | 0.0004  | -0.45114171 |
| TBC1D2  | -0.23632146  | 4.55884227 | -3.762663848 | 0.000208 | 0.0004  | -0.45463475 |
| ZNF564  | -0.137484157 | 0.7590006  | -3.761003901 | 0.00021  | 0.0004  | -0.46054971 |
| MYT1L   | -0.023911516 | 0.01942408 | -3.760890042 | 0.00021  | 0.0004  | -0.46095534 |
| NFKBIZ  | 0.572103958  | 4.16195208 | 3.760530142  | 0.00021  | 0.0004  | -0.46223744 |
| DUSP4   | 0.53373395   | 3.94104367 | 3.760334784  | 0.00021  | 0.0004  | -0.46293334 |
| C1QTNF  | 0.386750085  | 1.58130392 | 3.760206795  | 0.00021  | 0.0004  | -0.46338924 |
| GPR25   | 0.226242331  | 0.344016   | 3.759479808  | 0.000211 | 0.0004  | -0.46597851 |
| CMTR1   | -0.24323572  | 4.75464582 | -3.759191326 | 0.000211 | 0.0004  | -0.46700586 |

|         |              |            |              |          |         |             |
|---------|--------------|------------|--------------|----------|---------|-------------|
| RANBP2  | -0.315359027 | 4.97842525 | -3.759142898 | 0.000211 | 0.0004  | -0.46717831 |
| PPP2R2  | -0.34597888  | 0.29864256 | -3.758985195 | 0.000211 | 0.0004  | -0.46773989 |
| CLIC5   | 0.560463269  | 2.90997181 | 3.758275556  | 0.000212 | 0.0004  | -0.47026665 |
| ATG12   | -0.189863872 | 3.54576129 | -3.758274024 | 0.000212 | 0.0004  | -0.47027211 |
| RNF213  | 0.309982713  | 4.14548436 | 3.758261295  | 0.000212 | 0.0004  | -0.47031743 |
| MPZL2   | 0.552174137  | 6.92868848 | 3.7580173    | 0.000212 | 0.0004  | -0.4711861  |
| SRP72   | -0.281546635 | 5.79227557 | -3.757745242 | 0.000212 | 0.0004  | -0.47215463 |
| PYCR1   | -0.526475135 | 2.84778089 | -3.757428372 | 0.000213 | 0.0004  | -0.4732826  |
| FAM209E | -0.125392119 | 0.38609802 | -3.755998436 | 0.000214 | 0.00041 | -0.47837174 |
| IRAK4   | -0.22083225  | 3.87637281 | -3.755633484 | 0.000214 | 0.00041 | -0.47967033 |
| CNNM3   | -0.267472531 | 4.34650804 | -3.755292504 | 0.000214 | 0.00041 | -0.48088351 |
| DIMT1   | -0.211190724 | 4.44740788 | -3.755037806 | 0.000215 | 0.00041 | -0.48178965 |
| ZFR     | -0.32486747  | 5.30620977 | -3.754694393 | 0.000215 | 0.00041 | -0.48301132 |
| ADGRG2  | 0.493339568  | 1.64827353 | 3.754505299  | 0.000215 | 0.00041 | -0.48368396 |
| HSH2D   | 0.402349312  | 2.95805649 | 3.754166577  | 0.000215 | 0.00041 | -0.48488879 |
| PANX1   | -0.273950414 | 4.20268707 | -3.754116285 | 0.000215 | 0.00041 | -0.48506767 |
| GLS     | 0.361581969  | 5.23472124 | 3.754085382  | 0.000215 | 0.00041 | -0.48517759 |
| TFR2    | 0.108304527  | 0.32985778 | 3.753344004  | 0.000216 | 0.00041 | -0.48781426 |
| DZIP1L  | -0.270938553 | 1.2203285  | -3.75280306  | 0.000216 | 0.00041 | -0.48973781 |
| PDXP    | -0.171439163 | 0.6769077  | -3.750019056 | 0.000219 | 0.00041 | -0.49963356 |
| CPA3    | 0.495254805  | 1.16623699 | 3.74998913   | 0.000219 | 0.00041 | -0.4997399  |
| SYT17   | -0.277286781 | 2.89285655 | -3.749711012 | 0.000219 | 0.00042 | -0.5007281  |
| TH      | 0.146559041  | 0.29962546 | 3.748615142  | 0.00022  | 0.00042 | -0.50462128 |
| XRCC1   | -0.219169343 | 5.56881932 | -3.747907814 | 0.00022  | 0.00042 | -0.50713359 |
| MIGA1   | -0.287332947 | 3.42021522 | -3.747088643 | 0.000221 | 0.00042 | -0.51004262 |
| MYOCD   | 0.194067849  | 0.52892214 | 3.746402899  | 0.000222 | 0.00042 | -0.51247738 |
| NDRG4   | -0.227900051 | 1.18884135 | -3.745362349 | 0.000223 | 0.00042 | -0.51617113 |
| FKBP11  | -0.434272868 | 3.3170527  | -3.745078507 | 0.000223 | 0.00042 | -0.51717856 |
| PEX5L   | -0.046826297 | 0.11524139 | -3.74449535  | 0.000223 | 0.00042 | -0.51924811 |
| LIMS1   | -0.27264617  | 4.09640157 | -3.743634937 | 0.000224 | 0.00042 | -0.52230109 |
| PTPRF   | 0.493076254  | 6.39014085 | 3.743396637  | 0.000224 | 0.00042 | -0.52314653 |
| ASS1    | -0.347766133 | 7.71805961 | -3.742548519 | 0.000225 | 0.00043 | -0.52615509 |
| SENP6   | -0.282599104 | 4.62852895 | -3.742367197 | 0.000225 | 0.00043 | -0.52679823 |
| LBP     | 0.244610859  | 0.2400122  | 3.7422288    | 0.000225 | 0.00043 | -0.52728909 |
| ZNF614  | -0.301850747 | 3.05700802 | -3.742227679 | 0.000225 | 0.00043 | -0.52729306 |
| CSMD1   | -0.445219148 | 0.73234587 | -3.742009708 | 0.000225 | 0.00043 | -0.52806612 |
| ZNRF3   | 0.06256727   | 0.15376211 | 3.741273343  | 0.000226 | 0.00043 | -0.53067743 |
| SLC37A2 | 0.328874152  | 1.59751115 | 3.738387373  | 0.000228 | 0.00043 | -0.54090724 |
| ZNF510  | -0.268378271 | 2.77048963 | -3.73800281  | 0.000229 | 0.00043 | -0.54226986 |
| MOSPD1  | -0.199329409 | 3.87544754 | -3.73765408  | 0.000229 | 0.00043 | -0.5435054  |

|         |              |            |              |          |         |             |
|---------|--------------|------------|--------------|----------|---------|-------------|
| SCGB1D  | -0.25406115  | 0.46743884 | -3.73663244  | 0.00023  | 0.00044 | -0.54712445 |
| MMP24C  | -0.202330996 | 5.17522373 | -3.735545218 | 0.000231 | 0.00044 | -0.55097484 |
| BCL2L1  | 0.341089675  | 6.87969791 | 3.735120416  | 0.000231 | 0.00044 | -0.552479   |
| SNAPC4  | -0.250693136 | 3.55965549 | -3.735068197 | 0.000231 | 0.00044 | -0.55266389 |
| TRIM7   | -0.40544833  | 2.21059325 | -3.734400578 | 0.000232 | 0.00044 | -0.55502749 |
| FBXO38  | -0.257917412 | 3.75545438 | -3.7343367   | 0.000232 | 0.00044 | -0.55525362 |
| RNF128  | -0.371358691 | 6.34189834 | -3.734009529 | 0.000232 | 0.00044 | -0.55641176 |
| CPSF6   | -0.257449014 | 4.85467025 | -3.733345794 | 0.000233 | 0.00044 | -0.55876101 |
| ZSCAN4  | 0.226481064  | 0.48983949 | 3.733152032  | 0.000233 | 0.00044 | -0.55944675 |
| MED26   | -0.177192811 | 2.47136839 | -3.73282838  | 0.000233 | 0.00044 | -0.56059211 |
| IFNE    | 0.541090976  | 1.16737188 | 3.732448668  | 0.000234 | 0.00044 | -0.56193574 |
| TEP1    | 0.299974412  | 3.54711347 | 3.731361198  | 0.000235 | 0.00044 | -0.56578315 |
| KANK4   | -0.400537108 | 0.65828361 | -3.731350001 | 0.000235 | 0.00044 | -0.56582276 |
| LGR5    | 0.175667444  | 0.17252275 | 3.730158316  | 0.000236 | 0.00045 | -0.5700377  |
| CLDN14  | 0.077302652  | 0.11586053 | 3.729381065  | 0.000236 | 0.00045 | -0.57278616 |
| LEFTY2  | -0.296321554 | 0.23862219 | -3.728777231 | 0.000237 | 0.00045 | -0.57492103 |
| CCDC18  | -0.11805663  | 0.39864898 | -3.725586369 | 0.00024  | 0.00045 | -0.5861973  |
| COLCA2  | -0.430314534 | 2.7679806  | -3.72557706  | 0.00024  | 0.00045 | -0.58623018 |
| ST6GAL1 | -0.316529219 | 4.58276558 | -3.725314269 | 0.00024  | 0.00045 | -0.58715848 |
| FXYD5   | 0.488844931  | 6.42023901 | 3.723069011  | 0.000242 | 0.00046 | -0.59508734 |
| ADGRG1  | -0.363265457 | 7.89636012 | -3.72300151  | 0.000242 | 0.00046 | -0.59532564 |
| OFD1    | -0.235119851 | 4.87138026 | -3.722722297 | 0.000242 | 0.00046 | -0.59631134 |
| TRIM14  | 0.455041958  | 3.68655208 | 3.722462538  | 0.000243 | 0.00046 | -0.59722829 |
| RAB14   | -0.285940968 | 6.61470217 | -3.722411968 | 0.000243 | 0.00046 | -0.5974068  |
| LY6K    | -0.117839163 | 0.22555611 | -3.72178932  | 0.000243 | 0.00046 | -0.5996045  |
| CEACAM  | 0.057043606  | 0.10125663 | 3.721280249  | 0.000244 | 0.00046 | -0.60140107 |
| C5AR2   | -0.274334448 | 1.27195375 | -3.720487454 | 0.000244 | 0.00046 | -0.6041985  |
| ANKRD1  | -0.291416305 | 3.62879684 | -3.720196598 | 0.000245 | 0.00046 | -0.60522467 |
| DDX42   | -0.244031109 | 5.40079359 | -3.719464905 | 0.000245 | 0.00046 | -0.60780584 |
| FLT3    | 0.219344342  | 0.38090473 | 3.719326335  | 0.000245 | 0.00046 | -0.60829462 |
| ACTN1   | 0.385212244  | 4.91361282 | 3.719219486  | 0.000246 | 0.00046 | -0.6086715  |
| MED17   | -0.254423831 | 3.48319671 | -3.719155555 | 0.000246 | 0.00046 | -0.60889699 |
| ZFX     | -0.285173393 | 3.61471932 | -3.71775838  | 0.000247 | 0.00047 | -0.61382413 |
| MZB1    | 1.065957251  | 2.14726697 | 3.717582529  | 0.000247 | 0.00047 | -0.61444416 |
| MRTFB   | -0.304848354 | 3.21390577 | -3.717311497 | 0.000247 | 0.00047 | -0.61539972 |
| GCN1    | -0.2897616   | 5.11424134 | -3.71698474  | 0.000248 | 0.00047 | -0.61655166 |
| DUSP13  | 0.360244334  | 0.78760274 | 3.715469759  | 0.000249 | 0.00047 | -0.62189138 |
| TC2N    | -0.390266289 | 3.30111665 | -3.713757154 | 0.000251 | 0.00047 | -0.62792528 |
| SH3BP4  | -0.329619083 | 4.102588   | -3.712847794 | 0.000251 | 0.00047 | -0.63112815 |
| ZNF133  | -0.226292311 | 3.44067483 | -3.71199805  | 0.000252 | 0.00048 | -0.63412041 |

|          |              |            |              |          |         |             |
|----------|--------------|------------|--------------|----------|---------|-------------|
| GPR45    | -0.083732365 | 0.15804916 | -3.711885868 | 0.000252 | 0.00048 | -0.6345154  |
| C20orf20 | -0.170455369 | 0.53174189 | -3.711327155 | 0.000253 | 0.00048 | -0.63648245 |
| MBD4     | -0.229641064 | 5.05686585 | -3.711105058 | 0.000253 | 0.00048 | -0.6372643  |
| G2E3     | -0.241658584 | 2.1866199  | -3.710819486 | 0.000253 | 0.00048 | -0.63826955 |
| TSHZ3    | -0.387103501 | 3.28521268 | -3.709385881 | 0.000255 | 0.00048 | -0.64331497 |
| OXCT1    | -0.389961167 | 4.73239292 | -3.709176594 | 0.000255 | 0.00048 | -0.64405139 |
| LEXM     | -0.047161233 | 0.08999962 | -3.707699324 | 0.000256 | 0.00048 | -0.64924839 |
| TRIM32   | -0.275754837 | 3.7204961  | -3.706683839 | 0.000257 | 0.00048 | -0.65281976 |
| HERC2    | -0.274773711 | 3.62806698 | -3.7064426   | 0.000258 | 0.00048 | -0.65366805 |
| TIAM1    | 0.623580684  | 3.55171445 | 3.704675509  | 0.000259 | 0.00049 | -0.6598803  |
| COL5A3   | -0.442088805 | 2.94246628 | -3.704140593 | 0.00026  | 0.00049 | -0.66176028 |
| GALNT2   | -0.296010675 | 5.0958503  | -3.703791797 | 0.00026  | 0.00049 | -0.66298601 |
| FCER1G   | 0.55620433   | 5.43821584 | 3.703488286  | 0.00026  | 0.00049 | -0.66405251 |
| ZNF326   | -0.240069218 | 3.02006616 | -3.70344089  | 0.00026  | 0.00049 | -0.66421905 |
| ATP6V0/  | -0.255532581 | 4.9235885  | -3.70306956  | 0.000261 | 0.00049 | -0.66552374 |
| LRP2BP   | -0.282839089 | 1.87934622 | -3.702733189 | 0.000261 | 0.00049 | -0.6667055  |
| ELAVL4   | 0.043617205  | 0.09253682 | 3.701608684  | 0.000262 | 0.00049 | -0.67065548 |
| PLEKHA/  | -0.21201718  | 3.00344556 | -3.699841529 | 0.000264 | 0.0005  | -0.67686067 |
| CREB3L/  | -0.378757692 | 6.32417683 | -3.699174917 | 0.000265 | 0.0005  | -0.67920073 |
| C4orf50  | -0.054329409 | 0.09256098 | -3.699138928 | 0.000265 | 0.0005  | -0.67932705 |
| YY1AP1   | -0.232734573 | 4.79552836 | -3.699093923 | 0.000265 | 0.0005  | -0.67948502 |
| UBASH3   | 0.351754058  | 0.85418186 | 3.698846042  | 0.000265 | 0.0005  | -0.68035506 |
| ANKAR    | -0.196299549 | 1.42961848 | -3.697984152 | 0.000266 | 0.0005  | -0.68337981 |
| ACVR2A   | -0.259370772 | 2.92144575 | -3.697079765 | 0.000267 | 0.0005  | -0.68655301 |
| CD22     | 0.760656929  | 3.30444279 | 3.696033825  | 0.000268 | 0.0005  | -0.69022202 |
| TMEM12   | 0.131747422  | 0.49928074 | 3.695996729  | 0.000268 | 0.0005  | -0.69035213 |
| HIST1H2  | -0.219060248 | 0.43622138 | -3.6955433   | 0.000268 | 0.0005  | -0.69194238 |
| PRTN3    | 0.30674439   | 0.91034392 | 3.695008237  | 0.000269 | 0.00051 | -0.69381872 |
| GJB4     | 0.398645688  | 0.80003636 | 3.69350104   | 0.00027  | 0.00051 | -0.69910279 |
| SOWAH/   | -0.362078481 | 3.80242429 | -3.691488608 | 0.000272 | 0.00051 | -0.70615513 |
| ATP6V1C  | -0.263404969 | 1.43403053 | -3.69095892  | 0.000273 | 0.00051 | -0.70801079 |
| FANCD2   | 0.210563937  | 1.73650476 | 3.69076955   | 0.000273 | 0.00051 | -0.70867415 |
| TMEM24   | -0.355740194 | 6.12836987 | -3.689547329 | 0.000274 | 0.00052 | -0.71295485 |
| C17orf49 | -0.193193975 | 1.68996981 | -3.688631581 | 0.000275 | 0.00052 | -0.71616133 |
| ZNF48    | -0.208001143 | 3.7047467  | -3.688207428 | 0.000276 | 0.00052 | -0.71764626 |
| TTC33    | -0.300023551 | 3.97334068 | -3.688197087 | 0.000276 | 0.00052 | -0.71768245 |
| MORN3    | -0.230710792 | 1.43302985 | -3.687979485 | 0.000276 | 0.00052 | -0.7184442  |
| HEATR5/  | -0.287927393 | 2.695459   | -3.687858967 | 0.000276 | 0.00052 | -0.71886607 |
| ZNF311   | -0.245423585 | 2.23357598 | -3.687039406 | 0.000277 | 0.00052 | -0.72173461 |
| SLC6A1C  | -0.237107953 | 0.71985708 | -3.686625698 | 0.000277 | 0.00052 | -0.7231824  |

|          |              |            |              |          |         |             |
|----------|--------------|------------|--------------|----------|---------|-------------|
| C9orf135 | -0.194012591 | 0.19773212 | -3.685885178 | 0.000278 | 0.00052 | -0.72577353 |
| CTNND2   | -0.31891207  | 0.41307125 | -3.685661058 | 0.000278 | 0.00052 | -0.72655765 |
| SH3GL3   | -0.122264054 | 0.15935103 | -3.683938469 | 0.00028  | 0.00053 | -0.73258296 |
| WIPF2    | -0.234050708 | 4.54167151 | -3.683880233 | 0.00028  | 0.00053 | -0.73278662 |
| GLI3     | -0.342075359 | 2.33349231 | -3.683333937 | 0.000281 | 0.00053 | -0.73469691 |
| CGGBP1   | -0.249718555 | 5.51087711 | -3.683116648 | 0.000281 | 0.00053 | -0.73545666 |
| TCTE1    | -0.062014946 | 0.09887326 | -3.683024819 | 0.000281 | 0.00053 | -0.73577772 |
| CUBN     | -0.339403884 | 2.07822857 | -3.683008096 | 0.000281 | 0.00053 | -0.73583619 |
| PRSS36   | -0.151183587 | 1.1524355  | -3.68293411  | 0.000281 | 0.00053 | -0.73609487 |
| PLP1     | -0.568792233 | 0.73071914 | -3.682197598 | 0.000282 | 0.00053 | -0.73866965 |
| APLF     | -0.142495549 | 1.11487537 | -3.681995769 | 0.000282 | 0.00053 | -0.73937515 |
| ZNF398   | -0.208318261 | 2.99210729 | -3.681887012 | 0.000282 | 0.00053 | -0.7397553  |
| PCDHGA   | -0.158010622 | 0.49916657 | -3.681879539 | 0.000282 | 0.00053 | -0.73978142 |
| IGFBP5   | 0.837509802  | 8.79013124 | 3.681364772  | 0.000283 | 0.00053 | -0.74158059 |
| KCNJ1    | -0.438296586 | 0.63568443 | -3.680633967 | 0.000284 | 0.00053 | -0.74413444 |
| CCL24    | 0.321394084  | 0.60563633 | 3.679633244  | 0.000285 | 0.00053 | -0.74763081 |
| FBXO41   | 0.373106376  | 2.06816849 | 3.679207702  | 0.000285 | 0.00053 | -0.74911733 |
| PNN      | -0.27205049  | 5.91228536 | -3.678802915 | 0.000286 | 0.00053 | -0.7505312  |
| STX2     | -0.272697013 | 3.12958145 | -3.678542151 | 0.000286 | 0.00054 | -0.75144195 |
| LKAAEI   | -0.333961941 | 0.68327563 | -3.677321267 | 0.000287 | 0.00054 | -0.75570523 |
| SLC16A5  | -0.49207589  | 3.40456995 | -3.677157403 | 0.000287 | 0.00054 | -0.75627734 |
| INHBB    | 0.697862996  | 6.25927809 | 3.676712189  | 0.000288 | 0.00054 | -0.75783163 |
| MAPK11F  | -0.236652967 | 5.22015262 | -3.676390859 | 0.000288 | 0.00054 | -0.75895332 |
| CEP68    | -0.262377228 | 3.33626042 | -3.67515375  | 0.000289 | 0.00054 | -0.76327098 |
| ABCA7    | -0.276229838 | 3.52684359 | -3.673975649 | 0.000291 | 0.00054 | -0.76738148 |
| MEI1     | 0.413487074  | 0.95145019 | 3.673471315  | 0.000291 | 0.00055 | -0.76914078 |
| LIPI     | -0.524028609 | 0.64573446 | -3.672484263 | 0.000292 | 0.00055 | -0.77258335 |
| PPM1A    | -0.246981619 | 3.9919767  | -3.671855469 | 0.000293 | 0.00055 | -0.77477598 |
| FRMD8    | -0.252886025 | 4.82408918 | -3.670924691 | 0.000294 | 0.00055 | -0.77802102 |
| NFATC1   | -0.292579062 | 2.14737283 | -3.67071441  | 0.000294 | 0.00055 | -0.77875404 |
| CCDC85I  | -0.472573556 | 5.59721507 | -3.670320903 | 0.000295 | 0.00055 | -0.78012566 |
| AHNAK    | 0.444959926  | 6.31120853 | 3.670255765  | 0.000295 | 0.00055 | -0.78035269 |
| NUTM2E   | -0.072304364 | 0.1166648  | -3.670194618 | 0.000295 | 0.00055 | -0.78056582 |
| EAF1     | -0.27868633  | 4.0882365  | -3.670167913 | 0.000295 | 0.00055 | -0.78065889 |
| SCN3B    | -0.31089552  | 1.16680659 | -3.670114238 | 0.000295 | 0.00055 | -0.78084597 |
| SLC10A5  | -0.18004322  | 1.15636995 | -3.669793153 | 0.000295 | 0.00055 | -0.78196499 |
| CCT8     | -0.203831285 | 6.99473814 | -3.669453277 | 0.000296 | 0.00055 | -0.78314942 |
| GNL3     | -0.214899387 | 5.35640484 | -3.668777521 | 0.000296 | 0.00055 | -0.78550404 |
| ATP13A5  | -0.125705684 | 0.40282431 | -3.668369253 | 0.000297 | 0.00055 | -0.78692644 |
| ABL2     | 0.257134301  | 2.88562997 | 3.667042462  | 0.000298 | 0.00056 | -0.79154795 |

|         |              |            |              |          |         |             |
|---------|--------------|------------|--------------|----------|---------|-------------|
| MXD1    | -0.287718297 | 3.02917837 | -3.666912612 | 0.000298 | 0.00056 | -0.79200017 |
| ALDH3A1 | -0.284703574 | 0.76068646 | -3.666722182 | 0.000299 | 0.00056 | -0.79266333 |
| CYBRD1  | -0.386529384 | 7.66360356 | -3.666557308 | 0.000299 | 0.00056 | -0.79323748 |
| TMEM17  | 0.672500447  | 5.03344032 | 3.666387963  | 0.000299 | 0.00056 | -0.79382717 |
| DMRTA2  | -0.029881807 | 0.04135689 | -3.66619548  | 0.000299 | 0.00056 | -0.7944974  |
| WDR88   | -0.215061349 | 1.242017   | -3.664666432 | 0.000301 | 0.00056 | -0.79982044 |
| CLEC12E | 0.044400463  | 0.07640252 | 3.664186791  | 0.000302 | 0.00056 | -0.8014898  |
| ZNF574  | -0.19735406  | 3.74828532 | -3.664065519 | 0.000302 | 0.00056 | -0.80191185 |
| TAB2    | -0.279857387 | 4.6281726  | -3.663614468 | 0.000302 | 0.00056 | -0.80348147 |
| CRYAB   | -0.553638325 | 6.8901247  | -3.663574065 | 0.000302 | 0.00056 | -0.80362206 |
| ITGAL   | 0.500789081  | 2.308979   | 3.663450388  | 0.000302 | 0.00056 | -0.80405241 |
| PTPN20  | -0.311221597 | 0.45512763 | -3.662995459 | 0.000303 | 0.00057 | -0.80563529 |
| CCDC82  | -0.261831581 | 3.41980082 | -3.662071524 | 0.000304 | 0.00057 | -0.80884948 |
| PIK3C2A | -0.347463403 | 4.60485582 | -3.661707875 | 0.000304 | 0.00057 | -0.81011435 |
| HMGCLL  | -0.108700445 | 0.19697654 | -3.661208407 | 0.000305 | 0.00057 | -0.81185144 |
| IKZF5   | -0.255605291 | 3.80668784 | -3.66068777  | 0.000305 | 0.00057 | -0.81366193 |
| CDO1    | 0.746418784  | 2.87886663 | 3.660150302  | 0.000306 | 0.00057 | -0.81553071 |
| RERE    | -0.303920705 | 5.51382744 | -3.659905485 | 0.000306 | 0.00057 | -0.81638185 |
| PRPF38E | -0.264441227 | 4.7146515  | -3.659880542 | 0.000306 | 0.00057 | -0.81646857 |
| GPRIN1  | 0.298244403  | 1.41172713 | 3.658764286  | 0.000308 | 0.00057 | -0.82034874 |
| STXBP6  | -0.581838933 | 4.70148643 | -3.658327518 | 0.000308 | 0.00057 | -0.82186668 |
| RPS6KB  | -0.22132989  | 3.5934396  | -3.658301855 | 0.000308 | 0.00057 | -0.82195587 |
| DENND5  | -0.267747593 | 4.19763421 | -3.657520003 | 0.000309 | 0.00058 | -0.82467269 |
| PIAS1   | -0.297130166 | 3.72386054 | -3.657170595 | 0.000309 | 0.00058 | -0.82588667 |
| SLC9C1  | -0.208050035 | 0.57504759 | -3.655938681 | 0.000311 | 0.00058 | -0.83016596 |
| CENPB   | -0.182829194 | 6.94461139 | -3.655794258 | 0.000311 | 0.00058 | -0.83066755 |
| EFCAB8  | -0.064990879 | 0.16010489 | -3.655450908 | 0.000311 | 0.00058 | -0.83185997 |
| TBC1D1E | -0.291645483 | 3.51304822 | -3.65406959  | 0.000313 | 0.00058 | -0.83665613 |
| CORO1C  | 0.306409531  | 4.77690458 | 3.653884653  | 0.000313 | 0.00058 | -0.83729814 |
| PRUNE2  | 0.26309373   | 0.82321233 | 3.653695332  | 0.000313 | 0.00058 | -0.83795533 |
| ZNF474  | 0.342157704  | 0.83264121 | 3.65352879   | 0.000314 | 0.00058 | -0.83853343 |
| EXOC8   | -0.250532664 | 3.64648771 | -3.652760614 | 0.000315 | 0.00059 | -0.84119959 |
| CEACAM  | 0.398206781  | 1.3941227  | 3.652317664  | 0.000315 | 0.00059 | -0.84273675 |
| SPSB3   | -0.18412095  | 1.51883797 | -3.651243369 | 0.000316 | 0.00059 | -0.84646413 |
| ZBTB21  | -0.304722913 | 2.88363775 | -3.650784597 | 0.000317 | 0.00059 | -0.84805559 |
| TMEM12  | -0.290398475 | 2.2889819  | -3.649973575 | 0.000318 | 0.00059 | -0.85086855 |
| QRICH1  | -0.236515237 | 5.21875755 | -3.647733932 | 0.00032  | 0.0006  | -0.85863362 |
| CYBA    | -0.376131264 | 7.01035676 | -3.646838453 | 0.000322 | 0.0006  | -0.86173714 |
| ZNF345  | -0.193808519 | 1.91547645 | -3.646372624 | 0.000322 | 0.0006  | -0.86335132 |
| NRG4    | -0.131827464 | 0.29422491 | -3.644841147 | 0.000324 | 0.0006  | -0.86865686 |



|          |              |            |              |          |         |             |
|----------|--------------|------------|--------------|----------|---------|-------------|
| RETREG   | -0.24472176  | 6.63113422 | -3.643449098 | 0.000326 | 0.00061 | -0.87347763 |
| C11orf96 | -0.535248568 | 3.63854114 | -3.643430048 | 0.000326 | 0.00061 | -0.87354359 |
| RREB1    | -0.261182428 | 3.66863845 | -3.641499161 | 0.000328 | 0.00061 | -0.88022761 |
| FBRSL1   | -0.212895963 | 3.92671887 | -3.640427663 | 0.000329 | 0.00061 | -0.88393537 |
| DNAJC9   | -0.233752058 | 3.26577231 | -3.640417397 | 0.000329 | 0.00061 | -0.88397089 |
| LRRC20   | -0.231302021 | 3.7348794  | -3.640215726 | 0.000329 | 0.00061 | -0.88466863 |
| SLC6A6   | 0.465468144  | 4.35428967 | 3.640134764  | 0.00033  | 0.00061 | -0.88494873 |
| ZNF25    | -0.237438951 | 3.32022159 | -3.639318112 | 0.000331 | 0.00061 | -0.88777377 |
| RBP4     | 0.432345238  | 1.21580785 | 3.639179548  | 0.000331 | 0.00061 | -0.88825304 |
| RABEP1   | -0.232638883 | 4.86660251 | -3.637794723 | 0.000332 | 0.00062 | -0.89304208 |
| TUBB8    | -0.171493105 | 0.43914116 | -3.637726738 | 0.000333 | 0.00062 | -0.89327715 |
| SLCO5A   | 0.114889411  | 0.14013049 | 3.637147427  | 0.000333 | 0.00062 | -0.89528002 |
| FEN1     | -0.246381942 | 4.01711173 | -3.637096694 | 0.000333 | 0.00062 | -0.89545541 |
| PRR29    | -0.484739975 | 3.53105563 | -3.63623931  | 0.000334 | 0.00062 | -0.8984191  |
| DHX16    | -0.22329414  | 5.03005887 | -3.635368638 | 0.000335 | 0.00062 | -0.90142808 |
| SLITRK4  | 0.328954126  | 1.51453041 | 3.634138318  | 0.000337 | 0.00063 | -0.90567887 |
| VPS8     | -0.21140075  | 3.32964271 | -3.634076179 | 0.000337 | 0.00063 | -0.90589353 |
| SUPT3H   | -0.208056646 | 3.09674118 | -3.633959598 | 0.000337 | 0.00063 | -0.90629625 |
| LRIG2    | -0.236873324 | 2.95457779 | -3.633776033 | 0.000337 | 0.00063 | -0.90693033 |
| NKAPL    | -0.324199081 | 1.37146319 | -3.63218838  | 0.000339 | 0.00063 | -0.91241331 |
| KIAA121  | 0.202271448  | 0.36999122 | 3.631852878  | 0.00034  | 0.00063 | -0.91357169 |
| TSPAN1   | -0.350573408 | 6.41753521 | -3.631743464 | 0.00034  | 0.00063 | -0.91394944 |
| CACFD1   | -0.261445611 | 5.75129158 | -3.63026866  | 0.000342 | 0.00063 | -0.9190402  |
| SPTSSA   | -0.26367654  | 5.68843104 | -3.63020946  | 0.000342 | 0.00063 | -0.9192445  |
| PPFIBP2  | -0.273704979 | 4.71151802 | -3.630082655 | 0.000342 | 0.00063 | -0.91968212 |
| DMWD     | -0.185846652 | 4.14987695 | -3.629715622 | 0.000343 | 0.00064 | -0.9209487  |
| CD200R   | 0.224023424  | 0.71607765 | 3.629466066  | 0.000343 | 0.00064 | -0.92180982 |
| KLHL7    | -0.227273787 | 3.44673112 | -3.628729889 | 0.000344 | 0.00064 | -0.92434977 |
| STOX1    | -0.359239827 | 2.27931004 | -3.628324157 | 0.000344 | 0.00064 | -0.92574942 |
| MMS22L   | 0.131115737  | 0.85426014 | 3.627543844  | 0.000345 | 0.00064 | -0.92844086 |
| MAL      | -0.51570428  | 5.94637208 | -3.627219751 | 0.000346 | 0.00064 | -0.92955856 |
| HNRNPA   | -0.198170791 | 7.1067031  | -3.626947365 | 0.000346 | 0.00064 | -0.93049787 |
| PROC     | 0.305702151  | 1.03093722 | 3.626574423  | 0.000346 | 0.00064 | -0.93178384 |
| S100A3   | 0.319122587  | 1.43908254 | 3.626383772  | 0.000347 | 0.00064 | -0.93244119 |
| GOLGA4   | -0.366951857 | 5.29994192 | -3.62626151  | 0.000347 | 0.00064 | -0.93286273 |
| INCA1    | -0.278511327 | 3.49787275 | -3.62597445  | 0.000347 | 0.00064 | -0.93385241 |
| TAF6     | -0.313333779 | 4.85696855 | -3.625968411 | 0.000347 | 0.00064 | -0.93387323 |
| BAZ1A    | 0.275190165  | 3.64178503 | 3.625871987  | 0.000347 | 0.00064 | -0.93420564 |
| WWP2     | -0.240991226 | 4.56375524 | -3.625030503 | 0.000348 | 0.00065 | -0.93710629 |
| HNRNPL   | -0.141161197 | 0.52774318 | -3.62473144  | 0.000349 | 0.00065 | -0.93813703 |

|         |              |            |              |          |         |             |
|---------|--------------|------------|--------------|----------|---------|-------------|
| RSAD2   | 0.402114745  | 2.83232628 | 3.624141687  | 0.00035  | 0.00065 | -0.94016942 |
| NINJ2   | 0.323199951  | 1.41508923 | 3.624134465  | 0.00035  | 0.00065 | -0.94019431 |
| UBXN2A  | -0.219779779 | 3.15573802 | -3.62385696  | 0.00035  | 0.00065 | -0.94115054 |
| RFX3    | -0.259484389 | 2.03482112 | -3.623577543 | 0.00035  | 0.00065 | -0.94211329 |
| HNRNPL  | -0.262395651 | 4.55079559 | -3.623274226 | 0.000351 | 0.00065 | -0.94315831 |
| AMPD2   | -0.248219942 | 3.91814676 | -3.623265982 | 0.000351 | 0.00065 | -0.94318671 |
| IDO2    | -0.122167319 | 0.22600331 | -3.622612075 | 0.000352 | 0.00065 | -0.94543936 |
| ZC3HAV  | -0.36025166  | 2.65744434 | -3.622559952 | 0.000352 | 0.00065 | -0.9456189  |
| HECTD4  | -0.310151614 | 3.27018313 | -3.621728751 | 0.000353 | 0.00065 | -0.94848174 |
| ZNF483  | -0.262642652 | 1.60649106 | -3.621728707 | 0.000353 | 0.00065 | -0.94848189 |
| POLR2A  | -0.350526216 | 6.59776155 | -3.621285019 | 0.000353 | 0.00065 | -0.95000981 |
| MAML3   | -0.310171592 | 3.53024379 | -3.62101927  | 0.000354 | 0.00065 | -0.95092488 |
| ASB16   | -0.223056195 | 1.38830957 | -3.62083267  | 0.000354 | 0.00065 | -0.95156737 |
| MCM3    | -0.236451695 | 5.87319249 | -3.619860988 | 0.000355 | 0.00066 | -0.95491256 |
| RAB3B   | 0.063427397  | 0.09263632 | 3.619649789  | 0.000355 | 0.00066 | -0.95563954 |
| WDR1    | -0.250657992 | 7.14163989 | -3.619359878 | 0.000356 | 0.00066 | -0.9566374  |
| RIMBP3  | -0.11785167  | 0.38945237 | -3.619287953 | 0.000356 | 0.00066 | -0.95688495 |
| IFNAR2  | 0.275115867  | 2.30358919 | 3.619287291  | 0.000356 | 0.00066 | -0.95688723 |
| FPR1    | 0.477460392  | 2.15748155 | 3.619142517  | 0.000356 | 0.00066 | -0.9573855  |
| PLSCR4  | -0.370911897 | 3.89963328 | -3.618830861 | 0.000356 | 0.00066 | -0.95845807 |
| HMGB3   | -0.310831154 | 4.16421938 | -3.618649891 | 0.000357 | 0.00066 | -0.95908084 |
| AREG    | 0.677589724  | 2.20377518 | 3.618111413  | 0.000357 | 0.00066 | -0.96093374 |
| KIAA154 | 0.224297555  | 0.36128887 | 3.61689585   | 0.000359 | 0.00066 | -0.96511556 |
| TMEM25  | -0.210751119 | 4.93270251 | -3.616569517 | 0.000359 | 0.00066 | -0.96623801 |
| PLEKHH  | -0.292887348 | 4.53078602 | -3.61619398  | 0.00036  | 0.00066 | -0.96752958 |
| TBC1D7  | -0.151371903 | 2.12348462 | -3.616071204 | 0.00036  | 0.00067 | -0.96795182 |
| USP54   | -0.373175622 | 5.05959991 | -3.616003605 | 0.00036  | 0.00067 | -0.96818429 |
| UBE2T   | -0.271311823 | 3.31045627 | -3.615779917 | 0.000361 | 0.00067 | -0.96895352 |
| ZNF550  | -0.278380341 | 2.62586953 | -3.615360061 | 0.000361 | 0.00067 | -0.97039723 |
| ITPR3   | 0.525751406  | 6.12136417 | 3.615285741  | 0.000361 | 0.00067 | -0.97065276 |
| ODC1    | -0.425656794 | 7.0805661  | -3.615157613 | 0.000361 | 0.00067 | -0.9710933  |
| LOXHD1  | -0.070233875 | 0.1240508  | -3.61495917  | 0.000362 | 0.00067 | -0.97177558 |
| SLC25A4 | -0.24579119  | 3.25176818 | -3.614462895 | 0.000362 | 0.00067 | -0.97348169 |
| SET     | -0.255246164 | 7.63626758 | -3.613773275 | 0.000363 | 0.00067 | -0.97585215 |
| INO80   | -0.266380303 | 4.04305641 | -3.613128652 | 0.000364 | 0.00067 | -0.97806756 |
| VWA5B2  | -0.278651742 | 0.91118848 | -3.612142788 | 0.000365 | 0.00067 | -0.98145504 |
| IGF2BP3 | -0.375967251 | 0.40727784 | -3.611707894 | 0.000366 | 0.00067 | -0.9829491  |
| SOGA3   | 0.063981449  | 0.19955023 | 3.610569376  | 0.000367 | 0.00068 | -0.98685965 |
| RGL2    | -0.269423284 | 5.9114514  | -3.60979835  | 0.000369 | 0.00068 | -0.98950732 |
| PPM1J   | -0.324416775 | 2.37800717 | -3.609742162 | 0.000369 | 0.00068 | -0.98970024 |

|         |              |            |              |          |         |             |
|---------|--------------|------------|--------------|----------|---------|-------------|
| RSPRY1  | -0.262552886 | 4.60114418 | -3.608096005 | 0.000371 | 0.00068 | -0.99535128 |
| HSP90AI | -0.278053585 | 10.1329732 | -3.607703068 | 0.000371 | 0.00068 | -0.99669984 |
| SLC51B  | -0.202742244 | 0.70456119 | -3.607197593 | 0.000372 | 0.00069 | -0.99843443 |
| GPSM2   | -0.186769793 | 1.18317564 | -3.606809412 | 0.000373 | 0.00069 | -0.99976637 |
| TMSB4X  | 0.477962378  | 10.4444238 | 3.606275829  | 0.000373 | 0.00069 | -1.00159699 |
| BCKDK   | -0.203052366 | 5.2934542  | -3.606198039 | 0.000373 | 0.00069 | -1.00186386 |
| FGF17   | -0.276889338 | 0.86038081 | -3.604728934 | 0.000375 | 0.00069 | -1.00690274 |
| CCDC19  | -0.27459728  | 3.18584126 | -3.604423236 | 0.000376 | 0.00069 | -1.00795102 |
| AMBRA1  | -0.236954064 | 4.30096341 | -3.603858408 | 0.000377 | 0.00069 | -1.00988768 |
| FAM160E | -0.212705404 | 4.64188498 | -3.60352149  | 0.000377 | 0.00069 | -1.01104276 |
| APPL1   | -0.274983776 | 4.50840852 | -3.603521191 | 0.000377 | 0.00069 | -1.01104379 |
| CEACAM  | 0.308353877  | 1.16459321 | 3.602987969  | 0.000378 | 0.0007  | -1.01287167 |
| DIPK1B  | -0.430283013 | 4.1019409  | -3.602937032 | 0.000378 | 0.0007  | -1.01304627 |
| FCN2    | -0.088599789 | 0.1034869  | -3.602903449 | 0.000378 | 0.0007  | -1.01316138 |
| OR52N4  | 0.180117434  | 0.47272434 | 3.602181564  | 0.000379 | 0.0007  | -1.01563557 |
| WDR43   | -0.252237888 | 4.48833486 | -3.601517885 | 0.00038  | 0.0007  | -1.01790986 |
| TEKT1   | -0.112041436 | 0.11218501 | -3.601069434 | 0.00038  | 0.0007  | -1.01944639 |
| ARHGEF  | -0.357143078 | 2.49139686 | -3.600864989 | 0.000381 | 0.0007  | -1.02014683 |
| CCDC66  | -0.222991289 | 2.57541788 | -3.599884376 | 0.000382 | 0.0007  | -1.02350594 |
| TPSAB1  | 0.505844726  | 1.28477882 | 3.599531345  | 0.000383 | 0.0007  | -1.02471506 |
| PPP4C   | -0.206861239 | 6.59492551 | -3.599443844 | 0.000383 | 0.0007  | -1.02501473 |
| YES1    | -0.274411247 | 4.83476493 | -3.599117899 | 0.000383 | 0.0007  | -1.02613096 |
| CCDC11  | -0.217413497 | 2.46102437 | -3.599083964 | 0.000383 | 0.0007  | -1.02624716 |
| EGR2    | -0.724019605 | 4.93087956 | -3.598486637 | 0.000384 | 0.00071 | -1.02829251 |
| CR1     | 0.141780762  | 0.22482178 | 3.598143076  | 0.000385 | 0.00071 | -1.02946878 |
| MCOLN2  | 0.287524138  | 1.09603517 | 3.596975937  | 0.000386 | 0.00071 | -1.03346402 |
| ANKRD1  | -0.27354964  | 4.12149546 | -3.5952989   | 0.000389 | 0.00071 | -1.03920264 |
| PTCHD4  | 0.528333654  | 3.29495169 | 3.595155283  | 0.000389 | 0.00071 | -1.03969397 |
| EXD1    | -0.027437595 | 0.04965535 | -3.594919219 | 0.000389 | 0.00072 | -1.04050153 |
| CYP39A  | -0.430822687 | 3.09776586 | -3.594737713 | 0.000389 | 0.00072 | -1.04112242 |
| SMG8    | -0.3201477   | 3.50596439 | -3.594669585 | 0.00039  | 0.00072 | -1.04135546 |
| SOX30   | -0.131979357 | 0.35683015 | -3.593632381 | 0.000391 | 0.00072 | -1.04490288 |
| MAN1A2  | -0.311592569 | 4.64048722 | -3.593486501 | 0.000391 | 0.00072 | -1.04540174 |
| ADIPOR  | -0.187614509 | 6.62095237 | -3.593455211 | 0.000391 | 0.00072 | -1.04550874 |
| FAM102  | -0.282776223 | 5.45664348 | -3.592357419 | 0.000393 | 0.00072 | -1.04926221 |
| ZXDA    | -0.230431094 | 2.04130988 | -3.59123204  | 0.000394 | 0.00072 | -1.05310892 |
| RFC4    | -0.186031067 | 3.13082175 | -3.590764129 | 0.000395 | 0.00073 | -1.05470799 |
| TCN1    | 0.313837175  | 0.49333357 | 3.590303902  | 0.000396 | 0.00073 | -1.05628062 |
| ADAT1   | -0.246726107 | 3.73805518 | -3.589886573 | 0.000396 | 0.00073 | -1.0577065  |
| HS3ST1  | 0.276138007  | 1.14524932 | 3.589499368  | 0.000397 | 0.00073 | -1.05902933 |

|          |              |            |              |          |         |             |
|----------|--------------|------------|--------------|----------|---------|-------------|
| SLC30A8  | -0.288167752 | 0.33200325 | -3.588904111 | 0.000398 | 0.00073 | -1.06106268 |
| LMO1     | -0.161191469 | 0.33675245 | -3.588012179 | 0.000399 | 0.00073 | -1.06410888 |
| POU2AF   | 0.556239677  | 1.45622509 | 3.587949712  | 0.000399 | 0.00073 | -1.06432219 |
| EN2      | -0.046104656 | 0.04760459 | -3.587628976 | 0.0004   | 0.00073 | -1.06541741 |
| PADI2    | 0.303185519  | 1.43355589 | 3.587450544  | 0.0004   | 0.00073 | -1.06602666 |
| TBX4     | -0.027756815 | 0.04441372 | -3.587350989 | 0.0004   | 0.00073 | -1.06636658 |
| WDR82    | -0.273509933 | 6.30543141 | -3.586907684 | 0.000401 | 0.00074 | -1.06788009 |
| GULP1    | 0.371421917  | 1.37654593 | 3.586513147  | 0.000401 | 0.00074 | -1.06922695 |
| NPM3     | -0.288181369 | 5.33254608 | -3.585984269 | 0.000402 | 0.00074 | -1.07103221 |
| ZSCAN1   | -0.200725565 | 3.66989006 | -3.585842033 | 0.000402 | 0.00074 | -1.07151767 |
| HIST1H2  | -0.286261996 | 0.86216741 | -3.585684972 | 0.000402 | 0.00074 | -1.07205372 |
| ANLN     | 0.277236167  | 1.16495561 | 3.584518201  | 0.000404 | 0.00074 | -1.0760352  |
| MIF4GD   | -0.266609068 | 5.02513929 | -3.583284171 | 0.000406 | 0.00074 | -1.08024492 |
| DCUN1D   | 0.312022492  | 3.23805051 | 3.582913911  | 0.000407 | 0.00075 | -1.08150775 |
| VSIR     | -0.267598862 | 4.96934888 | -3.581831688 | 0.000408 | 0.00075 | -1.08519818 |
| PCDHB1   | -0.338606418 | 1.46121419 | -3.581458023 | 0.000409 | 0.00075 | -1.08647216 |
| TAF5     | -0.40228772  | 1.95825199 | -3.581354112 | 0.000409 | 0.00075 | -1.08682641 |
| IZUMO1   | -0.068770104 | 0.22580347 | -3.581173959 | 0.000409 | 0.00075 | -1.08744057 |
| WT1      | 0.109422047  | 0.12996877 | 3.580638473  | 0.00041  | 0.00075 | -1.08926592 |
| PRH1     | -0.125331636 | 0.81242701 | -3.58050628  | 0.00041  | 0.00075 | -1.0897165  |
| RRS1     | -0.212081286 | 4.85476976 | -3.579376281 | 0.000412 | 0.00075 | -1.09356749 |
| MS4A6A   | 0.447625921  | 3.16588827 | 3.579237245  | 0.000412 | 0.00075 | -1.09404124 |
| SLC35D3  | 0.088779554  | 0.09406577 | 3.578869889  | 0.000413 | 0.00076 | -1.09529289 |
| ZSCAN3   | -0.257447623 | 3.2048026  | -3.5781475   | 0.000414 | 0.00076 | -1.09775386 |
| EPPIN    | -0.163916601 | 0.12294683 | -3.578087839 | 0.000414 | 0.00076 | -1.09795709 |
| MT1A     | -0.517663898 | 2.17523736 | -3.577537808 | 0.000415 | 0.00076 | -1.09983056 |
| MSL2     | -0.248878326 | 4.43689144 | -3.577067101 | 0.000415 | 0.00076 | -1.10143364 |
| RBMS1    | -0.23669608  | 3.71102207 | -3.576801691 | 0.000416 | 0.00076 | -1.10233746 |
| MPST     | -0.242625823 | 3.92421987 | -3.57403021  | 0.00042  | 0.00077 | -1.11177173 |
| WDR74    | -0.201810881 | 4.243103   | -3.573063617 | 0.000421 | 0.00077 | -1.11506051 |
| C21orf62 | -0.045633512 | 0.15356185 | -3.57275542  | 0.000422 | 0.00077 | -1.11610896 |
| SKIL     | 0.298378231  | 4.46818912 | 3.572402089  | 0.000422 | 0.00077 | -1.11731085 |
| PJVK     | -0.250171195 | 1.56513277 | -3.572157809 | 0.000423 | 0.00077 | -1.11814174 |
| OSGEPL   | -0.195313037 | 3.00907065 | -3.570858319 | 0.000425 | 0.00078 | -1.1225609  |
| ACTRT3   | -0.276350631 | 1.96376844 | -3.570529181 | 0.000425 | 0.00078 | -1.12367996 |
| KIAA075  | -0.258440221 | 3.51971803 | -3.570305685 | 0.000426 | 0.00078 | -1.12443979 |
| SNX30    | 0.284856156  | 2.56950678 | 3.569658124  | 0.000427 | 0.00078 | -1.1266411  |
| CNTROB   | -0.215302002 | 4.09337511 | -3.569022575 | 0.000428 | 0.00078 | -1.12880121 |
| SHB      | -0.228468588 | 4.20128087 | -3.567032689 | 0.000431 | 0.00079 | -1.13556223 |
| TMX4     | -0.309391919 | 5.50147462 | -3.566410841 | 0.000432 | 0.00079 | -1.13767437 |

|          |              |            |              |          |         |             |
|----------|--------------|------------|--------------|----------|---------|-------------|
| A3GALT:  | -0.090261866 | 0.17665051 | -3.566135302 | 0.000432 | 0.00079 | -1.13861015 |
| ANKRD3   | -0.077734105 | 0.25872568 | -3.565902213 | 0.000433 | 0.00079 | -1.13940171 |
| GPR62    | -0.204467701 | 0.49411143 | -3.565477097 | 0.000433 | 0.00079 | -1.14084527 |
| IRF2     | -0.243220639 | 5.20730286 | -3.565093659 | 0.000434 | 0.00079 | -1.14214717 |
| SLC4A1   | -0.11643063  | 0.12888548 | -3.563645902 | 0.000436 | 0.0008  | -1.14706163 |
| IL7      | 0.248989537  | 1.02026237 | 3.56364532   | 0.000436 | 0.0008  | -1.14706361 |
| RRH      | -0.076338397 | 0.28728302 | -3.562833441 | 0.000437 | 0.0008  | -1.14981877 |
| SP140L   | 0.252473114  | 2.2608041  | 3.562162437  | 0.000438 | 0.0008  | -1.15209543 |
| KCTD16   | -0.1746734   | 0.21812974 | -3.561024336 | 0.00044  | 0.0008  | -1.15595603 |
| CYP2C8   | -0.328673832 | 1.18621948 | -3.560303098 | 0.000441 | 0.00081 | -1.158402   |
| ZAP70    | 0.408680837  | 1.38456149 | 3.560163764  | 0.000442 | 0.00081 | -1.15887448 |
| MINDY2   | -0.297869999 | 3.60684032 | -3.559607857 | 0.000443 | 0.00081 | -1.16075938 |
| ZNF341   | -0.174340922 | 2.19460053 | -3.558915412 | 0.000444 | 0.00081 | -1.16310686 |
| IQUB     | -0.247111951 | 1.54060407 | -3.557635303 | 0.000446 | 0.00081 | -1.16744551 |
| VPS35L   | -0.187676121 | 4.4549747  | -3.555851704 | 0.000449 | 0.00082 | -1.17348827 |
| CDC42B1  | 0.35299971   | 4.76337858 | 3.555704297  | 0.000449 | 0.00082 | -1.17398756 |
| TEX30    | -0.214468006 | 3.00216128 | -3.554635263 | 0.000451 | 0.00082 | -1.17760795 |
| SART3    | -0.251129936 | 4.62025883 | -3.554561159 | 0.000451 | 0.00082 | -1.17785888 |
| ZNF207   | -0.214594107 | 4.48795108 | -3.55364254  | 0.000452 | 0.00082 | -1.18096903 |
| SLC11A10 | 0.296748241  | 1.69945362 | 3.553608161  | 0.000452 | 0.00082 | -1.18108541 |
| SLC25A5  | -0.117519841 | 1.04984958 | -3.553304303 | 0.000453 | 0.00083 | -1.18211401 |
| PPP1R1   | -0.334364331 | 0.8971049  | -3.553047908 | 0.000453 | 0.00083 | -1.18298188 |
| TGIF1    | 0.331784143  | 4.7730771  | 3.551685727  | 0.000455 | 0.00083 | -1.18759175 |
| ADD2     | -0.297702489 | 0.58568547 | -3.551236679 | 0.000456 | 0.00083 | -1.18911106 |
| C14orf18 | -0.135342823 | 0.12632762 | -3.55112677  | 0.000456 | 0.00083 | -1.1894829  |
| DCAF10   | -0.229420033 | 3.84454085 | -3.550427331 | 0.000458 | 0.00083 | -1.19184897 |
| NXPE4    | 0.116834029  | 0.11394137 | 3.550228314  | 0.000458 | 0.00083 | -1.19252213 |
| SLC35E4  | -0.175130193 | 1.37690629 | -3.549698284 | 0.000459 | 0.00084 | -1.19431475 |
| KLHL34   | 0.137695233  | 0.17368824 | 3.549466917  | 0.000459 | 0.00084 | -1.19509719 |
| GALR3    | -0.076743427 | 0.12205432 | -3.549214337 | 0.00046  | 0.00084 | -1.1959513  |
| UNC5D    | -0.310735755 | 0.4526059  | -3.549196161 | 0.00046  | 0.00084 | -1.19601277 |
| SLC16A1  | -0.556656931 | 4.024091   | -3.549011098 | 0.00046  | 0.00084 | -1.19663853 |
| RPUSD4   | -0.206957955 | 3.80872194 | -3.547144552 | 0.000463 | 0.00084 | -1.20294836 |
| INPP5E   | -0.209841983 | 4.02792829 | -3.54691889  | 0.000463 | 0.00084 | -1.203711   |
| PLK3     | 0.416115348  | 4.68949021 | 3.546379007  | 0.000464 | 0.00085 | -1.20553541 |
| BBS7     | -0.201587846 | 2.8440525  | -3.545754142 | 0.000465 | 0.00085 | -1.20764667 |
| IL1R2    | 0.37892824   | 1.04538901 | 3.54543812   | 0.000466 | 0.00085 | -1.2087143  |
| POLR1A   | -0.246848999 | 3.3273508  | -3.545143018 | 0.000466 | 0.00085 | -1.20971117 |
| EFEMP2   | -0.404692483 | 6.05933068 | -3.543965687 | 0.000468 | 0.00085 | -1.21368754 |
| FRRS1    | -0.286392594 | 1.62618098 | -3.543936178 | 0.000468 | 0.00085 | -1.21378719 |

|         |              |            |              |          |         |             |
|---------|--------------|------------|--------------|----------|---------|-------------|
| TBC1D5  | -0.273429772 | 4.39181411 | -3.543820636 | 0.000469 | 0.00085 | -1.21417736 |
| CDC5L   | -0.258436947 | 4.55733377 | -3.543751436 | 0.000469 | 0.00085 | -1.21441103 |
| ZNF846  | -0.199688544 | 2.483311   | -3.543373341 | 0.000469 | 0.00085 | -1.2156877  |
| RNASEH  | -0.219969582 | 4.50951236 | -3.542529596 | 0.000471 | 0.00086 | -1.21853624 |
| MIER3   | -0.268524771 | 3.73505135 | -3.542116474 | 0.000471 | 0.00086 | -1.21993074 |
| TENT5D  | -0.038400476 | 0.04337794 | -3.542033173 | 0.000472 | 0.00086 | -1.2202119  |
| RNF123  | -0.284048258 | 3.53178211 | -3.541443482 | 0.000473 | 0.00086 | -1.22220212 |
| SYK     | -0.263187536 | 5.72796819 | -3.540764374 | 0.000474 | 0.00086 | -1.22449374 |
| TTC21B  | -0.215651835 | 2.65576363 | -3.540546157 | 0.000474 | 0.00086 | -1.22523002 |
| CHRNA4  | -0.19469067  | 0.40920711 | -3.540108672 | 0.000475 | 0.00086 | -1.226706   |
| LRRC25  | 0.368509553  | 2.23555817 | 3.539207478  | 0.000476 | 0.00087 | -1.22974593 |
| XRCC5   | -0.252778566 | 7.39124309 | -3.53916277  | 0.000477 | 0.00087 | -1.22989672 |
| SGK2    | 0.231854365  | 0.89020394 | 3.538513271  | 0.000478 | 0.00087 | -1.23208716 |
| ZNF827  | -0.269163653 | 3.50464361 | -3.5383854   | 0.000478 | 0.00087 | -1.23251836 |
| ANKRD3  | -0.07655889  | 0.07834738 | -3.538364512 | 0.000478 | 0.00087 | -1.2325888  |
| NME8    | -0.316134009 | 0.58255441 | -3.537024182 | 0.00048  | 0.00087 | -1.23710774 |
| ATP5MG  | -0.055094754 | 0.11908146 | -3.537007718 | 0.00048  | 0.00087 | -1.23716324 |
| SYNPO   | 0.354803743  | 5.13893958 | 3.536383989  | 0.000481 | 0.00087 | -1.23926562 |
| DDX60   | 0.418018773  | 3.92065452 | 3.536332776  | 0.000481 | 0.00087 | -1.23943822 |
| EFCAB1  | -0.291968338 | 6.27252051 | -3.536323454 | 0.000481 | 0.00087 | -1.23946964 |
| PTBP1   | -0.186128419 | 6.71910723 | -3.536022338 | 0.000482 | 0.00088 | -1.24048447 |
| PRMT2   | -0.201396981 | 5.11318811 | -3.534828241 | 0.000484 | 0.00088 | -1.24450804 |
| FAM161A | -0.249457384 | 2.42360185 | -3.531286059 | 0.00049  | 0.00089 | -1.25643638 |
| HAS1    | 0.390102218  | 0.45291533 | 3.531233944  | 0.00049  | 0.00089 | -1.2566118  |
| CEP95   | -0.260888223 | 3.60021557 | -3.530647682 | 0.000491 | 0.00089 | -1.25858497 |
| PAM16   | -0.202097705 | 3.23331029 | -3.529929996 | 0.000493 | 0.00089 | -1.26100007 |
| PHF21A  | -0.233253646 | 3.76718775 | -3.529726287 | 0.000493 | 0.00089 | -1.26168549 |
| CPTP    | -0.206179688 | 5.48773268 | -3.529036064 | 0.000494 | 0.0009  | -1.26400763 |
| GSN     | 0.457983899  | 8.19114227 | 3.527697371  | 0.000497 | 0.0009  | -1.26851027 |
| MFSD6   | -0.28478271  | 5.83864165 | -3.527229009 | 0.000497 | 0.0009  | -1.27008522 |
| STUM    | -0.209680908 | 0.37896627 | -3.526940465 | 0.000498 | 0.0009  | -1.2710554  |
| PCNX4   | -0.232298682 | 2.82420515 | -3.526362593 | 0.000499 | 0.00091 | -1.27299819 |
| AP5Z1   | -0.187729486 | 3.92404262 | -3.525473293 | 0.000501 | 0.00091 | -1.27598743 |
| ZSCAN5  | -0.031224206 | 0.06446589 | -3.525301546 | 0.000501 | 0.00091 | -1.27656465 |
| DAPL1   | -0.567477482 | 6.1213567  | -3.524984015 | 0.000502 | 0.00091 | -1.27763177 |
| ZNF182  | -0.22998486  | 3.48420023 | -3.524523316 | 0.000502 | 0.00091 | -1.27917987 |
| WNT9B   | 0.099332793  | 0.2652869  | 3.523595888  | 0.000504 | 0.00091 | -1.28229578 |
| ZNF575  | -0.158661118 | 2.01107544 | -3.522700698 | 0.000506 | 0.00092 | -1.28530268 |
| TAGAP   | 0.419308964  | 1.91322342 | 3.522490648  | 0.000506 | 0.00092 | -1.28600812 |
| C5AR1   | 0.410075519  | 2.74514209 | 3.522117561  | 0.000507 | 0.00092 | -1.28726103 |

|          |              |            |              |          |         |             |
|----------|--------------|------------|--------------|----------|---------|-------------|
| ECE1     | 0.389378818  | 7.66588174 | 3.521478799  | 0.000508 | 0.00092 | -1.28940585 |
| ADAMTS   | 0.200406531  | 1.09561345 | 3.519841809  | 0.000511 | 0.00093 | -1.29490089 |
| ZC3H14   | -0.24826614  | 3.16962082 | -3.519783945 | 0.000511 | 0.00093 | -1.29509508 |
| CAGE1    | -0.030150523 | 0.06317499 | -3.519219587 | 0.000512 | 0.00093 | -1.29698895 |
| LURAP11  | 0.561155031  | 3.46059354 | 3.518990365  | 0.000512 | 0.00093 | -1.29775809 |
| CDH8     | -0.086692021 | 0.16937176 | -3.518945988 | 0.000513 | 0.00093 | -1.29790699 |
| ASIC1    | -0.237497145 | 0.81856796 | -3.518868363 | 0.000513 | 0.00093 | -1.29816744 |
| CHIC1    | -0.234682626 | 3.25614657 | -3.517528658 | 0.000515 | 0.00093 | -1.3026617  |
| GORAB    | -0.251288943 | 3.07418239 | -3.51727613  | 0.000516 | 0.00093 | -1.30350867 |
| TAF5L    | -0.2348965   | 3.52578598 | -3.516538776 | 0.000517 | 0.00094 | -1.30598142 |
| VWCE     | 0.270977368  | 1.07654415 | 3.515838344  | 0.000518 | 0.00094 | -1.30832992 |
| ANKRD3   | -0.022202834 | 0.02384742 | -3.515583934 | 0.000519 | 0.00094 | -1.30918283 |
| IL11     | 0.162255556  | 0.25002588 | 3.515165481  | 0.00052  | 0.00094 | -1.31058558 |
| SGMS1    | 0.35847913   | 4.84892617 | 3.514618239  | 0.000521 | 0.00094 | -1.31241982 |
| RANBP3   | -0.200280759 | 5.01066369 | -3.513746334 | 0.000522 | 0.00094 | -1.31534174 |
| APOOL    | -0.292664532 | 3.78561562 | -3.513416078 | 0.000523 | 0.00095 | -1.31644832 |
| FYTTD1   | -0.228247472 | 4.82648471 | -3.511886434 | 0.000526 | 0.00095 | -1.32157241 |
| TMSB10   | 0.444373194  | 12.0301923 | 3.511160846  | 0.000527 | 0.00095 | -1.32400232 |
| ZNF140   | -0.253882219 | 3.41450058 | -3.509283631 | 0.000531 | 0.00096 | -1.33028679 |
| RAPGEF   | -0.33226567  | 5.20063728 | -3.508805972 | 0.000532 | 0.00096 | -1.33188539 |
| CASZ1    | -0.234922184 | 1.10130951 | -3.508609869 | 0.000532 | 0.00096 | -1.33254164 |
| C6orf163 | -0.113494771 | 0.50440328 | -3.508544888 | 0.000532 | 0.00096 | -1.33275908 |
| FAIM2    | 0.234067203  | 0.49812304 | 3.507188621  | 0.000535 | 0.00097 | -1.33729677 |
| MAP2K4   | -0.23770863  | 4.55455212 | -3.506560363 | 0.000536 | 0.00097 | -1.33939821 |
| TBL1XR1  | -0.261444846 | 5.64937337 | -3.504563572 | 0.00054  | 0.00098 | -1.34607492 |
| WDSUB1   | -0.296874589 | 4.96183842 | -3.503787553 | 0.000541 | 0.00098 | -1.34866878 |
| FAM193A  | -0.2115746   | 4.19759363 | -3.50277179  | 0.000543 | 0.00098 | -1.35206321 |
| VIRMA    | -0.220901207 | 3.88643037 | -3.502460925 | 0.000544 | 0.00098 | -1.35310186 |
| STRIP1   | -0.226186986 | 3.75544469 | -3.501936721 | 0.000545 | 0.00098 | -1.35485312 |
| CST7     | 0.570185713  | 3.14195874 | 3.500937903  | 0.000547 | 0.00099 | -1.35818933 |
| CYS1     | -0.975467663 | 4.00217524 | -3.500605278 | 0.000547 | 0.00099 | -1.35930015 |
| ZNF157   | -0.138802955 | 0.55116019 | -3.500563565 | 0.000547 | 0.00099 | -1.35943945 |
| ZMAT3    | 0.372764947  | 4.79231646 | 3.500119852  | 0.000548 | 0.00099 | -1.36092109 |
| HRCT1    | -0.396047499 | 2.6012705  | -3.500030872 | 0.000548 | 0.00099 | -1.3612182  |
| NR1H2    | -0.177471276 | 6.5702324  | -3.499282564 | 0.00055  | 0.00099 | -1.3637165  |
| CXCL9    | 0.971142391  | 3.69362754 | 3.498934557  | 0.000551 | 0.00099 | -1.36487819 |
| MFAP5    | 0.593653218  | 1.44346511 | 3.497312863  | 0.000554 | 0.001   | -1.37029024 |
| MAP4K3   | -0.304570775 | 4.28021111 | -3.496665666 | 0.000555 | 0.001   | -1.37244948 |
| CABLES1  | -0.208895641 | 3.48112367 | -3.496397418 | 0.000556 | 0.001   | -1.37334433 |
| RPL22L1  | -0.2590312   | 4.45189999 | -3.496298135 | 0.000556 | 0.001   | -1.37367551 |

|         |              |            |              |          |         |             |
|---------|--------------|------------|--------------|----------|---------|-------------|
| RIPK3   | -0.368594506 | 3.56786824 | -3.495998001 | 0.000556 | 0.001   | -1.37467663 |
| GJA3    | -0.343430028 | 0.64135523 | -3.495941206 | 0.000557 | 0.001   | -1.37486606 |
| TIGD4   | -0.2014244   | 1.14143385 | -3.495615181 | 0.000557 | 0.00101 | -1.37595344 |
| SREK1IF | -0.176241666 | 3.58045234 | -3.495458742 | 0.000558 | 0.00101 | -1.37647516 |
| TBC1D1  | -0.232527011 | 5.22661675 | -3.494996101 | 0.000558 | 0.00101 | -1.37801797 |
| PLA2G4C | -0.305110945 | 2.38215611 | -3.492900293 | 0.000563 | 0.00101 | -1.38500467 |
| CEP57   | -0.226635043 | 4.06388097 | -3.492884353 | 0.000563 | 0.00101 | -1.3850578  |
| CCDC85  | -0.239287896 | 2.70419958 | -3.492691654 | 0.000563 | 0.00102 | -1.3857     |
| STAB2   | -0.103054308 | 0.15060717 | -3.492568716 | 0.000563 | 0.00102 | -1.38610969 |
| CALML6  | -0.093141051 | 0.23678165 | -3.491927855 | 0.000565 | 0.00102 | -1.38824516 |
| SMR3B   | -0.557762482 | 0.51919153 | -3.491494813 | 0.000565 | 0.00102 | -1.38968793 |
| RHPN2   | -0.300648869 | 2.79805568 | -3.491464774 | 0.000566 | 0.00102 | -1.38978801 |
| CITED1  | 1.074056485  | 7.2504957  | 3.489892001  | 0.000569 | 0.00102 | -1.39502664 |
| HIST1H2 | -0.297994079 | 1.67491498 | -3.48973055  | 0.000569 | 0.00103 | -1.39556428 |
| PCNX3   | -0.223198825 | 4.82119536 | -3.489081243 | 0.00057  | 0.00103 | -1.39772629 |
| DGCR8   | -0.215347321 | 3.80201813 | -3.488567052 | 0.000571 | 0.00103 | -1.39943814 |
| LBH     | -0.334705723 | 7.21694396 | -3.488542783 | 0.000571 | 0.00103 | -1.39951894 |
| MAFG    | -0.298363874 | 4.25336705 | -3.487992224 | 0.000573 | 0.00103 | -1.4013516  |
| ABHD13  | -0.251089881 | 3.66516114 | -3.48792348  | 0.000573 | 0.00103 | -1.40158041 |
| COL12A1 | 0.508146602  | 2.43907101 | 3.487223804  | 0.000574 | 0.00103 | -1.40390903 |
| ICK     | -0.24888062  | 3.28747234 | -3.486911524 | 0.000575 | 0.00103 | -1.4049482  |
| PIP5KL1 | 0.432857034  | 2.11153313 | 3.486540689  | 0.000576 | 0.00104 | -1.40618211 |
| FBXO27  | -0.287290079 | 1.72003085 | -3.486339613 | 0.000576 | 0.00104 | -1.40685112 |
| LPA     | -0.066869595 | 0.06021763 | -3.486200319 | 0.000576 | 0.00104 | -1.40731455 |
| TSR1    | -0.230079257 | 3.99205968 | -3.485945595 | 0.000577 | 0.00104 | -1.40816198 |
| ANKRD1  | 0.238720884  | 1.84021045 | 3.485150907  | 0.000578 | 0.00104 | -1.4108054  |
| CDH17   | 0.088127464  | 0.21670879 | 3.484873347  | 0.000579 | 0.00104 | -1.41172854 |
| MFSD14L | -0.248524064 | 5.73298616 | -3.484528463 | 0.00058  | 0.00104 | -1.4128755  |
| SOS1    | -0.268614547 | 4.09439296 | -3.484181974 | 0.00058  | 0.00104 | -1.4140277  |
| FKBP10  | -0.38624838  | 5.95621378 | -3.484002141 | 0.000581 | 0.00104 | -1.41462566 |
| ANGPTL  | -0.108805682 | 0.41202053 | -3.48382079  | 0.000581 | 0.00105 | -1.41522865 |
| LRRC49  | -0.193768592 | 1.49693919 | -3.483763409 | 0.000581 | 0.00105 | -1.41541943 |
| MAP2K3  | -0.214147421 | 5.3148895  | -3.482572122 | 0.000584 | 0.00105 | -1.41937963 |
| SAP30L  | -0.236023105 | 4.04324104 | -3.482355415 | 0.000584 | 0.00105 | -1.4200999  |
| PELI2   | -0.249953582 | 1.92992552 | -3.482351987 | 0.000584 | 0.00105 | -1.4201113  |
| PLPP2   | 0.553523834  | 3.19584915 | 3.481929263  | 0.000585 | 0.00105 | -1.42151618 |
| LPCAT3  | -0.396984848 | 3.18186097 | -3.481384237 | 0.000586 | 0.00105 | -1.42332731 |
| DGKB    | -0.040704495 | 0.09725356 | -3.481358326 | 0.000586 | 0.00105 | -1.4234134  |
| SFPQ    | -0.229122367 | 6.53777441 | -3.480194602 | 0.000589 | 0.00106 | -1.42727956 |
| RARG    | 0.327841599  | 4.9819014  | 3.479862801  | 0.000589 | 0.00106 | -1.42838167 |



|          |              |            |              |          |         |             |
|----------|--------------|------------|--------------|----------|---------|-------------|
| TMEM22   | -0.294332073 | 2.42261917 | -3.479232646 | 0.000591 | 0.00106 | -1.43047452 |
| KLF12    | 0.297758005  | 1.99342327 | 3.47904282   | 0.000591 | 0.00106 | -1.4311049  |
| DNAH12   | -0.042583451 | 0.0940082  | -3.478011704 | 0.000593 | 0.00107 | -1.43452849 |
| ABCC9    | -0.299502614 | 1.49412629 | -3.477848494 | 0.000594 | 0.00107 | -1.43507031 |
| ARHGEF   | -0.12331089  | 0.65648572 | -3.477514023 | 0.000594 | 0.00107 | -1.4361806  |
| KLC1     | -0.203867139 | 2.6333938  | -3.47736145  | 0.000595 | 0.00107 | -1.43668704 |
| CYSLTR   | -0.223997756 | 1.23378399 | -3.477205501 | 0.000595 | 0.00107 | -1.43720467 |
| CTBP1    | -0.176382343 | 5.73296351 | -3.476489948 | 0.000597 | 0.00107 | -1.43957946 |
| RABIF    | -0.191468512 | 3.82125081 | -3.475996443 | 0.000598 | 0.00107 | -1.44121706 |
| LRRC71   | -0.067899892 | 0.13629064 | -3.475671996 | 0.000598 | 0.00107 | -1.44229355 |
| PJA2     | -0.331486594 | 6.74794472 | -3.47564174  | 0.000598 | 0.00107 | -1.44239394 |
| GJA4     | -0.489528638 | 6.34775583 | -3.475362491 | 0.000599 | 0.00107 | -1.44332039 |
| TREML1   | 0.206165852  | 0.68446466 | 3.474775851  | 0.0006   | 0.00108 | -1.44526644 |
| RGS11    | 0.355212089  | 1.47932904 | 3.473902373  | 0.000602 | 0.00108 | -1.44816345 |
| MAT2B    | -0.279227174 | 6.06244345 | -3.473839197 | 0.000602 | 0.00108 | -1.44837296 |
| TNFSF15  | -0.371306266 | 4.79060362 | -3.473377294 | 0.000603 | 0.00108 | -1.44990464 |
| KIAA1211 | 0.442997896  | 6.16197797 | 3.47273614   | 0.000605 | 0.00108 | -1.4520304  |
| NLRP3    | 0.341042612  | 1.5175993  | 3.472540797  | 0.000605 | 0.00109 | -1.452678   |
| DCTN4    | -0.213074127 | 5.24273792 | -3.472421261 | 0.000605 | 0.00109 | -1.45307426 |
| FGFR1O   | -0.222286369 | 4.42232669 | -3.472383835 | 0.000605 | 0.00109 | -1.45319833 |
| YEATS2   | -0.2613832   | 3.65594688 | -3.472340502 | 0.000605 | 0.00109 | -1.45334198 |
| FZD10    | 0.240261966  | 0.81709329 | 3.471791496  | 0.000607 | 0.00109 | -1.45516175 |
| RPL8     | -0.226786633 | 10.840045  | -3.471711998 | 0.000607 | 0.00109 | -1.45542524 |
| NOL8     | -0.207202041 | 3.53225077 | -3.470435175 | 0.00061  | 0.00109 | -1.45965638 |
| ACBD3    | -0.315937479 | 5.70232348 | -3.46885546  | 0.000613 | 0.0011  | -1.4648893  |
| TRAP1    | -0.260256487 | 4.41117495 | -3.467972604 | 0.000615 | 0.0011  | -1.46781288 |
| USP12    | -0.250177421 | 4.22771367 | -3.465592545 | 0.00062  | 0.00111 | -1.47569106 |
| ZFP30    | -0.219178468 | 2.34401951 | -3.464931283 | 0.000622 | 0.00111 | -1.47787902 |
| XPO5     | -0.23456134  | 4.19719036 | -3.464701721 | 0.000622 | 0.00111 | -1.4786385  |
| GALR1    | -0.056183963 | 0.07951556 | -3.462288132 | 0.000627 | 0.00112 | -1.48662078 |
| RNASE3   | 0.080448227  | 0.15495081 | 3.46139357   | 0.000629 | 0.00113 | -1.48957801 |
| DDIAS    | 0.114491662  | 0.54247513 | 3.460798688  | 0.000631 | 0.00113 | -1.49154418 |
| KLHL15   | -0.289549687 | 2.97801306 | -3.460546508 | 0.000631 | 0.00113 | -1.49237758 |
| HSF1     | -0.179072273 | 5.81070591 | -3.459256612 | 0.000634 | 0.00114 | -1.49663952 |
| PARVB    | -0.254370199 | 2.62410183 | -3.458727684 | 0.000635 | 0.00114 | -1.49838674 |
| NEDD8-1  | -0.081693461 | 0.27352278 | -3.458675677 | 0.000636 | 0.00114 | -1.49855852 |
| PTPN2    | -0.192904787 | 3.94149316 | -3.457749634 | 0.000638 | 0.00114 | -1.5016169  |
| MSH3     | -0.240573146 | 3.81746298 | -3.457678866 | 0.000638 | 0.00114 | -1.50185059 |
| GNE      | -0.271901986 | 3.4189628  | -3.457152305 | 0.000639 | 0.00114 | -1.50358926 |
| FAM20B   | -0.234265443 | 5.00925604 | -3.456941019 | 0.000639 | 0.00114 | -1.50428685 |

|         |              |            |              |          |         |             |
|---------|--------------|------------|--------------|----------|---------|-------------|
| MTRNR2  | 0.146752463  | 0.38174298 | 3.456828086  | 0.00064  | 0.00114 | -1.50465969 |
| ST20-MT | -0.114628705 | 0.40107034 | -3.456676662 | 0.00064  | 0.00115 | -1.5051596  |
| PVR     | -0.236740045 | 4.47154552 | -3.456641193 | 0.00064  | 0.00115 | -1.50527669 |
| PUM2    | -0.24873527  | 6.13963292 | -3.456265507 | 0.000641 | 0.00115 | -1.50651687 |
| RELT    | 0.239936356  | 1.81071272 | 3.455765931  | 0.000642 | 0.00115 | -1.50816583 |
| GPRIN2  | -0.340488467 | 2.91400747 | -3.455764324 | 0.000642 | 0.00115 | -1.50817114 |
| GTF3C3  | -0.222692642 | 3.63567227 | -3.455677493 | 0.000642 | 0.00115 | -1.50845772 |
| ARHGEF  | -0.283244026 | 4.40120596 | -3.455129698 | 0.000644 | 0.00115 | -1.51026555 |
| H3F3C   | -0.147199251 | 0.8667016  | -3.454915248 | 0.000644 | 0.00115 | -1.5109732  |
| CLASP2  | -0.230185948 | 2.90381388 | -3.454509606 | 0.000645 | 0.00115 | -1.51231165 |
| IRAK2   | 0.388917309  | 3.4480877  | 3.454421641  | 0.000645 | 0.00115 | -1.51260188 |
| GYG1    | -0.215523259 | 4.92787157 | -3.454327805 | 0.000645 | 0.00115 | -1.51291148 |
| BZW1    | -0.254571197 | 4.7503028  | -3.454237135 | 0.000646 | 0.00115 | -1.51321061 |
| INAFM1  | -0.298330413 | 4.93768371 | -3.453973989 | 0.000646 | 0.00115 | -1.51407875 |
| CDAN1   | -0.207447933 | 3.27027748 | -3.453895684 | 0.000646 | 0.00115 | -1.51433707 |
| PLEKHF  | -0.252131193 | 4.06668557 | -3.453817729 | 0.000647 | 0.00115 | -1.51459423 |
| GDPD2   | -0.063241442 | 0.21215815 | -3.453252573 | 0.000648 | 0.00116 | -1.51645844 |
| TAS1R3  | 0.377807888  | 1.47869715 | 3.452844181  | 0.000649 | 0.00116 | -1.51780537 |
| WDR6    | -0.275948511 | 6.89423872 | -3.452355586 | 0.00065  | 0.00116 | -1.51941664 |
| SLC9A8  | -0.240430456 | 3.85699862 | -3.452229426 | 0.00065  | 0.00116 | -1.51983265 |
| PRPF4B  | -0.268082753 | 4.71359428 | -3.4505143   | 0.000654 | 0.00117 | -1.52548687 |
| ACSL5   | 0.454005641  | 3.96832246 | 3.449848922  | 0.000656 | 0.00117 | -1.52767972 |
| MEIOC   | -0.035410194 | 0.1321608  | -3.449626199 | 0.000656 | 0.00117 | -1.52841366 |
| CYSRT1  | 0.422244247  | 3.14300471 | 3.449283956  | 0.000657 | 0.00117 | -1.52954135 |
| DOCK9   | 0.43356779   | 5.60770651 | 3.449045603  | 0.000658 | 0.00117 | -1.53032667 |
| ATN1    | -0.240053519 | 7.27041277 | -3.447568596 | 0.000661 | 0.00118 | -1.53519195 |
| SH2D1A  | 0.413074218  | 1.06833717 | 3.445976453  | 0.000665 | 0.00119 | -1.54043437 |
| PPP1R1  | -0.188398269 | 4.58201326 | -3.445604173 | 0.000666 | 0.00119 | -1.54165985 |
| FBN3    | 0.534719486  | 2.70271862 | 3.445213701  | 0.000667 | 0.00119 | -1.54294509 |
| API5    | -0.234629312 | 5.93439378 | -3.444832586 | 0.000667 | 0.00119 | -1.5441994  |
| SERTAD  | -0.318118006 | 5.41078758 | -3.444738116 | 0.000668 | 0.00119 | -1.5445103  |
| MUC4    | 0.184069401  | 0.30528868 | 3.444631929  | 0.000668 | 0.00119 | -1.54485975 |
| TMEM31  | -0.153632994 | 0.46530743 | -3.444276551 | 0.000669 | 0.00119 | -1.54602917 |
| ZSCAN5  | -0.034676184 | 0.07311788 | -3.443632214 | 0.00067  | 0.0012  | -1.54814919 |
| DDX3X   | -0.312721049 | 6.53036349 | -3.443425193 | 0.000671 | 0.0012  | -1.54883026 |
| CREG2   | 0.046056007  | 0.11036224 | 3.442573952  | 0.000673 | 0.0012  | -1.55163033 |
| PARP4   | 0.398980069  | 5.80788748 | 3.441814761  | 0.000675 | 0.0012  | -1.55412708 |
| SYCE2   | -0.157347894 | 1.04520656 | -3.441736268 | 0.000675 | 0.0012  | -1.55438519 |
| HLA-A   | 0.39040971   | 10.3698177 | 3.441263109  | 0.000676 | 0.0012  | -1.55594098 |
| UNC13C  | -0.174211627 | 0.33961199 | -3.440722559 | 0.000677 | 0.00121 | -1.55771812 |

|         |              |            |              |          |         |             |
|---------|--------------|------------|--------------|----------|---------|-------------|
| IDUA    | -0.310145479 | 3.50851799 | -3.440384337 | 0.000678 | 0.00121 | -1.55882994 |
| PCP2    | -0.408346462 | 2.36500308 | -3.440230236 | 0.000678 | 0.00121 | -1.55933648 |
| KDM6A   | -0.326646888 | 3.78076757 | -3.43987498  | 0.000679 | 0.00121 | -1.56050415 |
| CLN8    | -0.242268035 | 3.19775232 | -3.439854008 | 0.000679 | 0.00121 | -1.56057308 |
| RPS5    | -0.262099137 | 8.61223412 | -3.438706562 | 0.000682 | 0.00121 | -1.56434377 |
| RBM15B  | -0.203709348 | 5.13894226 | -3.43789741  | 0.000684 | 0.00122 | -1.56700208 |
| IL6R    | 0.361295643  | 2.11362011 | 3.437138773  | 0.000686 | 0.00122 | -1.56949392 |
| APOC2   | 0.109425655  | 0.25825183 | 3.436996337  | 0.000686 | 0.00122 | -1.56996171 |
| CRTAP   | -0.20842713  | 6.65351899 | -3.436696798 | 0.000687 | 0.00122 | -1.57094541 |
| TSPYL4  | -0.32340163  | 4.93500067 | -3.43631398  | 0.000688 | 0.00122 | -1.57220248 |
| GNB1    | -0.205190445 | 7.25768091 | -3.433887038 | 0.000694 | 0.00123 | -1.58016897 |
| TMEM26  | -0.237897438 | 3.3663718  | -3.433875037 | 0.000694 | 0.00123 | -1.58020835 |
| KCNB1   | -0.191925613 | 0.26863436 | -3.433840697 | 0.000694 | 0.00123 | -1.58032103 |
| VPS37A  | -0.212392096 | 4.02525127 | -3.433645521 | 0.000694 | 0.00124 | -1.58096147 |
| NUDT21  | -0.275943097 | 5.3860029  | -3.433252971 | 0.000695 | 0.00124 | -1.58224946 |
| ENGASE  | -0.278231466 | 3.56054908 | -3.431664712 | 0.000699 | 0.00124 | -1.58745929 |
| ARRDC5  | 0.121553074  | 0.26863432 | 3.431146395  | 0.0007   | 0.00125 | -1.58915901 |
| TMEM13  | 0.285698094  | 3.31449614 | 3.430254764  | 0.000703 | 0.00125 | -1.59208239 |
| NPFF    | -0.138142303 | 0.60522557 | -3.429894107 | 0.000704 | 0.00125 | -1.59326467 |
| RAP1B   | -0.189202568 | 2.76110373 | -3.42900329  | 0.000706 | 0.00125 | -1.59618441 |
| SLC38A1 | -0.284598284 | 1.0950741  | -3.4287434   | 0.000706 | 0.00126 | -1.59703609 |
| SNAPC3  | -0.198732309 | 3.87410634 | -3.428517044 | 0.000707 | 0.00126 | -1.59777783 |
| SLC9A6  | -0.220582448 | 3.89514845 | -3.427753798 | 0.000709 | 0.00126 | -1.60027857 |
| NR2C1   | -0.231954686 | 3.41876108 | -3.427662723 | 0.000709 | 0.00126 | -1.60057694 |
| ZNF665  | -0.157524679 | 1.47280452 | -3.426186991 | 0.000713 | 0.00127 | -1.60541055 |
| SP5     | -0.160405979 | 0.22350543 | -3.425774501 | 0.000714 | 0.00127 | -1.60676127 |
| AK1     | -0.325467454 | 5.45307969 | -3.425774025 | 0.000714 | 0.00127 | -1.60676283 |
| GLRX3   | -0.190559239 | 4.60106583 | -3.425629655 | 0.000714 | 0.00127 | -1.60723555 |
| LILRB2  | 0.309934335  | 1.45272309 | 3.425570815  | 0.000714 | 0.00127 | -1.6074282  |
| ACKR1   | 0.627492971  | 3.37643175 | 3.425457786  | 0.000715 | 0.00127 | -1.60779828 |
| GAPVD1  | -0.245669833 | 3.68588406 | -3.424723436 | 0.000717 | 0.00127 | -1.61020239 |
| KLHL9   | -0.260106243 | 4.69775708 | -3.424529658 | 0.000717 | 0.00127 | -1.6108367  |
| DPP7    | -0.24499141  | 7.7803882  | -3.424318863 | 0.000718 | 0.00127 | -1.61152668 |
| TNIP3   | 0.113426656  | 0.21742622 | 3.422646167  | 0.000722 | 0.00128 | -1.6170004  |
| ALKBH6  | -0.19628257  | 1.49837071 | -3.422424212 | 0.000722 | 0.00128 | -1.61772654 |
| POC1A   | -0.218906765 | 2.49561193 | -3.422129356 | 0.000723 | 0.00128 | -1.61869111 |
| KRBA1   | -0.202574868 | 2.88479017 | -3.421942698 | 0.000724 | 0.00128 | -1.6193017  |
| SFR1    | -0.185967652 | 3.69240605 | -3.421936908 | 0.000724 | 0.00128 | -1.61932064 |
| NR4A1   | -0.716863414 | 5.31829129 | -3.421538035 | 0.000725 | 0.00129 | -1.6206253  |
| ASPN    | 0.592016349  | 3.63168592 | 3.421245682  | 0.000725 | 0.00129 | -1.62158146 |

|          |              |            |              |          |         |             |
|----------|--------------|------------|--------------|----------|---------|-------------|
| SAMHD1   | 0.364668679  | 5.04104941 | 3.420677156  | 0.000727 | 0.00129 | -1.62344065 |
| TSHZ1    | -0.254545701 | 3.53094224 | -3.420362946 | 0.000728 | 0.00129 | -1.62446806 |
| IL21R    | 0.351367955  | 1.21364292 | 3.419865473  | 0.000729 | 0.00129 | -1.62609453 |
| ANKRD2   | -0.024155024 | 0.03723525 | -3.419436635 | 0.00073  | 0.00129 | -1.62749642 |
| TMEM91   | -0.337510405 | 3.12669608 | -3.418549073 | 0.000732 | 0.0013  | -1.6303974  |
| SLFN12L  | 0.168315336  | 0.49039713 | 3.417745407  | 0.000734 | 0.0013  | -1.63302357 |
| STAP1    | 0.338415335  | 0.6350249  | 3.417729512  | 0.000734 | 0.0013  | -1.6330755  |
| CDA      | -0.387783559 | 3.89594685 | -3.417535037 | 0.000735 | 0.0013  | -1.63371091 |
| WASL     | -0.26358597  | 5.85975858 | -3.416948077 | 0.000736 | 0.00131 | -1.63562848 |
| ASB2     | 0.243841435  | 0.76246639 | 3.416907673  | 0.000736 | 0.00131 | -1.63576047 |
| TRIOBP   | -0.186489898 | 3.39619864 | -3.416801101 | 0.000737 | 0.00131 | -1.6361086  |
| CYP8B1   | -0.036332491 | 0.07767042 | -3.415952328 | 0.000739 | 0.00131 | -1.63888086 |
| SH3PXD   | 0.292272192  | 3.29481885 | 3.415247445  | 0.000741 | 0.00131 | -1.64118267 |
| ERCC4    | -0.216968844 | 2.01522289 | -3.415030007 | 0.000741 | 0.00131 | -1.64189263 |
| ADAM9    | -0.391929928 | 5.30354335 | -3.414463441 | 0.000743 | 0.00132 | -1.64374234 |
| ERVMER   | -0.201773688 | 0.46790147 | -3.414284373 | 0.000743 | 0.00132 | -1.64432689 |
| FAM71E   | -0.252661327 | 3.41580267 | -3.413126985 | 0.000746 | 0.00132 | -1.64810445 |
| PIM1     | 0.377226043  | 4.37675035 | 3.412974321  | 0.000747 | 0.00132 | -1.64860264 |
| PON1     | 0.047873907  | 0.09203529 | 3.412606278  | 0.000748 | 0.00132 | -1.64980359 |
| PCGF2    | -0.23218273  | 5.9138706  | -3.412567585 | 0.000748 | 0.00132 | -1.64992984 |
| TNFRSF   | 0.277235886  | 5.36424128 | 3.412190919  | 0.000749 | 0.00133 | -1.65115879 |
| PALM3    | 0.74440133   | 4.69229234 | 3.41169241   | 0.00075  | 0.00133 | -1.6527851  |
| RPS3     | -0.243697028 | 8.89952872 | -3.411304803 | 0.000751 | 0.00133 | -1.65404945 |
| PCLAF    | -0.302415577 | 2.43463555 | -3.411263362 | 0.000751 | 0.00133 | -1.65418462 |
| ATP1B1   | -0.308926074 | 9.22477933 | -3.410894488 | 0.000752 | 0.00133 | -1.65538773 |
| ORC3     | -0.20555008  | 4.49325214 | -3.410874491 | 0.000752 | 0.00133 | -1.65545294 |
| MMP8     | 0.051480153  | 0.04944409 | 3.410484042  | 0.000753 | 0.00133 | -1.65672629 |
| CD180    | 0.351702895  | 1.08861633 | 3.410399073  | 0.000753 | 0.00133 | -1.65700337 |
| TOR1AIF  | -0.280078024 | 4.95724486 | -3.410152755 | 0.000754 | 0.00133 | -1.65780658 |
| VSIG2    | -0.558567818 | 6.25348937 | -3.41004471  | 0.000754 | 0.00133 | -1.65815889 |
| RGS9     | -0.252491598 | 0.88603821 | -3.409535946 | 0.000756 | 0.00134 | -1.65981769 |
| CRYBB2   | -0.239960228 | 0.90610998 | -3.409437925 | 0.000756 | 0.00134 | -1.66013725 |
| CPNE7    | 0.212504259  | 0.50944427 | 3.409129586  | 0.000757 | 0.00134 | -1.66114244 |
| PIK3IP1  | -0.286871883 | 6.39896597 | -3.407871544 | 0.00076  | 0.00134 | -1.66524281 |
| NEU3     | -0.203652986 | 2.62039269 | -3.40719294  | 0.000762 | 0.00135 | -1.66745402 |
| HDAC5    | -0.207197594 | 5.36627806 | -3.40716399  | 0.000762 | 0.00135 | -1.66754835 |
| ANG      | 0.384175082  | 3.12454589 | 3.406900595  | 0.000763 | 0.00135 | -1.6684065  |
| SIGLEC10 | 0.375228801  | 1.62342007 | 3.406411429  | 0.000764 | 0.00135 | -1.67000006 |
| POU2F2   | 0.320427862  | 1.15818645 | 3.405414849  | 0.000767 | 0.00135 | -1.67324599 |
| ARRDC2   | 0.341525665  | 5.58631665 | 3.404860216  | 0.000768 | 0.00136 | -1.67505209 |

|         |              |            |              |          |         |             |
|---------|--------------|------------|--------------|----------|---------|-------------|
| DUSP3   | -0.222016597 | 5.71519349 | -3.40478272  | 0.000768 | 0.00136 | -1.67530442 |
| TMEM22  | -0.287050846 | 1.62701241 | -3.404492274 | 0.000769 | 0.00136 | -1.6762501  |
| TMEM40  | 0.186174056  | 0.27854989 | 3.403853748  | 0.000771 | 0.00136 | -1.67832885 |
| NHS     | -0.285434128 | 1.17647501 | -3.403614024 | 0.000772 | 0.00136 | -1.67910919 |
| RBM26   | -0.220726087 | 4.10021753 | -3.402698743 | 0.000774 | 0.00137 | -1.68208812 |
| C1QL4   | -0.5673438   | 2.55629257 | -3.402245955 | 0.000775 | 0.00137 | -1.68356152 |
| GPR157  | -0.257186452 | 2.95247484 | -3.402238546 | 0.000775 | 0.00137 | -1.68358562 |
| UTP18   | -0.252385042 | 5.46244328 | -3.402073654 | 0.000776 | 0.00137 | -1.68412215 |
| NUDT11  | 0.576617903  | 2.05153615 | 3.401711017  | 0.000777 | 0.00137 | -1.68530201 |
| OBP2A   | 0.25360217   | 0.297076   | 3.401443345  | 0.000777 | 0.00137 | -1.68617282 |
| ARHGAP  | -0.27697078  | 3.61592866 | -3.401333929 | 0.000778 | 0.00137 | -1.68652876 |
| C8orf34 | 0.054230018  | 0.14125648 | 3.401332188  | 0.000778 | 0.00137 | -1.68653442 |
| KIF24   | -0.182580982 | 1.52759221 | -3.400863656 | 0.000779 | 0.00137 | -1.68805849 |
| GTPBP3  | -0.180760109 | 3.09470357 | -3.400530334 | 0.00078  | 0.00138 | -1.68914263 |
| BCO1    | -0.096348427 | 0.12379854 | -3.39973631  | 0.000782 | 0.00138 | -1.69172481 |
| HDAC9   | -0.389285931 | 1.93871975 | -3.399503202 | 0.000783 | 0.00138 | -1.69248277 |
| NECAP2  | -0.196289081 | 5.24683018 | -3.397905176 | 0.000787 | 0.00139 | -1.69767759 |
| LIPN    | 0.06929533   | 0.10167552 | 3.397396221  | 0.000789 | 0.00139 | -1.69933161 |
| APOBEC  | 0.330190205  | 1.93322287 | 3.397382952  | 0.000789 | 0.00139 | -1.69937473 |
| ARMCX2  | -0.331764353 | 6.98241077 | -3.396185659 | 0.000792 | 0.0014  | -1.70326485 |
| FCRL2   | 0.221978043  | 0.27123673 | 3.396159394  | 0.000792 | 0.0014  | -1.70335017 |
| USPL1   | -0.235152091 | 3.59953748 | -3.395757671 | 0.000793 | 0.0014  | -1.70465511 |
| ANKRD3  | 0.101936     | 0.45267046 | 3.394899603  | 0.000795 | 0.0014  | -1.70744197 |
| VAT1L   | 0.607063218  | 2.1241148  | 3.394150765  | 0.000798 | 0.00141 | -1.70987353 |
| KPNB1   | -0.207466281 | 6.2210157  | -3.394067804 | 0.000798 | 0.00141 | -1.71014288 |
| PIP4P2  | -0.270185795 | 3.01324624 | -3.393899111 | 0.000798 | 0.00141 | -1.71069057 |
| HIST1H4 | -0.180472803 | 0.36488429 | -3.393839273 | 0.000798 | 0.00141 | -1.71088484 |
| LAG3    | 0.466212162  | 1.57686469 | 3.393529086  | 0.000799 | 0.00141 | -1.71189182 |
| RBMS3   | -0.277970855 | 4.1049588  | -3.393473238 | 0.000799 | 0.00141 | -1.71207312 |
| TTC29   | -0.105832715 | 0.09443605 | -3.39333394  | 0.0008   | 0.00141 | -1.7125253  |
| SCAF1   | -0.198554686 | 5.94282154 | -3.392848459 | 0.000801 | 0.00141 | -1.7141011  |
| FSD1L   | -0.189613418 | 1.47841213 | -3.392521451 | 0.000802 | 0.00141 | -1.71516241 |
| MID1IP1 | -0.275774154 | 4.70761389 | -3.391357121 | 0.000805 | 0.00142 | -1.7189405  |
| PCGF6   | -0.166650154 | 2.69488025 | -3.390894823 | 0.000807 | 0.00142 | -1.72044026 |
| SLC52A1 | -0.306012018 | 0.94484712 | -3.390623688 | 0.000807 | 0.00142 | -1.72131977 |
| UTP14A  | -0.192209577 | 4.04240405 | -3.390466058 | 0.000808 | 0.00142 | -1.72183107 |
| TMEM30  | -0.424077182 | 6.66965378 | -3.389601802 | 0.00081  | 0.00143 | -1.72463401 |
| ATP8B4  | 0.135637478  | 0.63597597 | 3.389437731  | 0.000811 | 0.00143 | -1.72516606 |
| TRAF3IP | 0.329189955  | 1.07266507 | 3.388272289  | 0.000814 | 0.00143 | -1.72894461 |
| PNMA8B  | -0.32306633  | 1.48005577 | -3.387880459 | 0.000815 | 0.00143 | -1.73021471 |

|         |              |            |              |          |         |             |
|---------|--------------|------------|--------------|----------|---------|-------------|
| ATR     | -0.218648125 | 2.89875474 | -3.386880854 | 0.000818 | 0.00144 | -1.73345431 |
| CLU     | 0.761720672  | 10.7478948 | 3.386682867  | 0.000819 | 0.00144 | -1.73409586 |
| FAM171A | -0.492077984 | 3.54459761 | -3.386673325 | 0.000819 | 0.00144 | -1.73412677 |
| MTCP1   | -0.14511156  | 1.07278854 | -3.386147499 | 0.00082  | 0.00144 | -1.73583046 |
| SLC39A4 | -0.386605322 | 3.71550116 | -3.38420646  | 0.000826 | 0.00145 | -1.74211738 |
| LRRC3C  | -0.070129591 | 0.13600285 | -3.384127715 | 0.000826 | 0.00145 | -1.74237236 |
| CXCR2   | 0.12215382   | 0.36481782 | 3.384002479  | 0.000826 | 0.00145 | -1.74277787 |
| RFK     | -0.265751641 | 4.84706759 | -3.383630595 | 0.000827 | 0.00145 | -1.74398194 |
| TMEM30  | -0.284010109 | 7.18245777 | -3.382912759 | 0.000829 | 0.00146 | -1.74630578 |
| CYP4F12 | -0.13214383  | 0.27809894 | -3.382853902 | 0.00083  | 0.00146 | -1.74649629 |
| HECTD1  | -0.300029046 | 5.20012497 | -3.381479749 | 0.000834 | 0.00147 | -1.75094348 |
| TEDC2   | -0.228716229 | 1.68714981 | -3.38125642  | 0.000834 | 0.00147 | -1.75166609 |
| ATP2C1  | -0.263555059 | 5.08656957 | -3.381048189 | 0.000835 | 0.00147 | -1.7523398  |
| CBX5    | -0.24876716  | 5.04418489 | -3.37996549  | 0.000838 | 0.00147 | -1.75584218 |
| ACOX1   | -0.218716784 | 4.96402871 | -3.379815755 | 0.000838 | 0.00147 | -1.75632647 |
| NR5A2   | -0.222383705 | 0.8620114  | -3.379425831 | 0.00084  | 0.00147 | -1.75758752 |
| ATP8A2  | -0.207916823 | 0.52953219 | -3.378771171 | 0.000842 | 0.00148 | -1.75970445 |
| ATP2B4  | 0.323934467  | 5.08510337 | 3.37866185   | 0.000842 | 0.00148 | -1.76005792 |
| ACOT7   | 0.296167916  | 3.51659465 | 3.378596375  | 0.000842 | 0.00148 | -1.76026961 |
| SF3A1   | -0.296146664 | 6.11552519 | -3.378568685 | 0.000842 | 0.00148 | -1.76035914 |
| CPZ     | 0.291678306  | 0.92953765 | 3.378426579  | 0.000843 | 0.00148 | -1.76081858 |
| SOAT2   | 0.12958953   | 0.2979694  | 3.377714338  | 0.000845 | 0.00148 | -1.76312106 |
| DGKA    | 0.291825639  | 2.45520211 | 3.37653772   | 0.000848 | 0.00149 | -1.76692378 |
| ZNF891  | -0.136673832 | 0.96230488 | -3.376245943 | 0.000849 | 0.00149 | -1.76786658 |
| SIT1    | 0.473365763  | 1.60778871 | 3.374478603  | 0.000854 | 0.0015  | -1.77357573 |
| LZTR1   | -0.187330695 | 4.067143   | -3.374340644 | 0.000855 | 0.0015  | -1.77402127 |
| HTR1D   | 0.179026668  | 0.39265378 | 3.37431261   | 0.000855 | 0.0015  | -1.77411118 |
| TDRD7   | -0.214201354 | 3.83349609 | -3.374311784 | 0.000855 | 0.0015  | -1.77411447 |
| GDF1    | 0.287918874  | 1.37831881 | 3.374287176  | 0.000855 | 0.0015  | -1.77419394 |
| CERS1   | 0.287918874  | 1.37831881 | 3.374287176  | 0.000855 | 0.0015  | -1.77419394 |
| RBMXL1  | -0.248709076 | 3.36723399 | -3.374272906 | 0.000855 | 0.0015  | -1.77424002 |
| SDR9C7  | -0.056589062 | 0.08397569 | -3.373584342 | 0.000857 | 0.0015  | -1.77646347 |
| AMN     | -0.155083501 | 0.37660578 | -3.37257853  | 0.00086  | 0.00151 | -1.77971059 |
| PKN3    | -0.221183197 | 3.42423464 | -3.372272507 | 0.000861 | 0.00151 | -1.78069837 |
| IL10    | 0.178327974  | 0.45213586 | 3.372153605  | 0.000861 | 0.00151 | -1.78108214 |
| SULF1   | 0.606173786  | 4.47850509 | 3.371772921  | 0.000862 | 0.00151 | -1.78231075 |
| ZNF708  | -0.238131974 | 2.5856001  | -3.370942588 | 0.000865 | 0.00152 | -1.78499011 |
| VSIG4   | 0.456730186  | 3.68624831 | 3.370420631  | 0.000866 | 0.00152 | -1.78667409 |
| CLPX    | -0.235883587 | 4.87611703 | -3.369326754 | 0.00087  | 0.00152 | -1.79020244 |
| PLAAT4  | 0.521861998  | 6.17201713 | 3.368992314  | 0.000871 | 0.00153 | -1.79128099 |

|         |              |            |              |          |         |             |
|---------|--------------|------------|--------------|----------|---------|-------------|
| PAFAH1I | -0.226728541 | 5.63409959 | -3.36897123  | 0.000871 | 0.00153 | -1.79134898 |
| KRAS    | -0.217586771 | 3.79127098 | -3.368384347 | 0.000872 | 0.00153 | -1.79324139 |
| ARSA    | -0.267744278 | 5.84368498 | -3.368148588 | 0.000873 | 0.00153 | -1.79400151 |
| ARHGAP  | 0.257882039  | 2.31837832 | 3.368084394  | 0.000873 | 0.00153 | -1.79420847 |
| WNT5B   | 0.356963505  | 1.95184396 | 3.367862142  | 0.000874 | 0.00153 | -1.79492499 |
| SIK1B   | 0.46946984   | 1.9450851  | 3.366717917  | 0.000878 | 0.00154 | -1.79861316 |
| EHMT2   | -0.206158911 | 4.91554503 | -3.366451855 | 0.000878 | 0.00154 | -1.79947059 |
| ANO7    | -0.167720141 | 1.18242186 | -3.364775312 | 0.000883 | 0.00155 | -1.80487211 |
| HLA-DRE | 0.688384932  | 7.30950808 | 3.364356947  | 0.000885 | 0.00155 | -1.80621963 |
| RGL4    | 0.177988884  | 0.78425218 | 3.363970845  | 0.000886 | 0.00155 | -1.80746309 |
| LRRC29  | -0.235608243 | 3.48405006 | -3.363867062 | 0.000886 | 0.00155 | -1.80779731 |
| DNAJB1  | -0.251531357 | 3.54465683 | -3.363068598 | 0.000889 | 0.00156 | -1.81036832 |
| SLC38A5 | -0.494363409 | 1.64887821 | -3.362893922 | 0.000889 | 0.00156 | -1.81093069 |
| TRAT1   | 0.305798885  | 0.5921622  | 3.362366373  | 0.000891 | 0.00156 | -1.81262898 |
| SCNN1G  | -0.523648223 | 3.50633963 | -3.362243326 | 0.000891 | 0.00156 | -1.81302506 |
| PSMB9   | 0.486943112  | 4.72493601 | 3.362220136  | 0.000891 | 0.00156 | -1.81309971 |
| PCSK6   | -0.132770956 | 0.30342196 | -3.362059524 | 0.000892 | 0.00156 | -1.81361668 |
| UBR2    | -0.22624758  | 4.37631149 | -3.361820744 | 0.000893 | 0.00156 | -1.81438522 |
| UBXN2B  | -0.268231969 | 4.3165395  | -3.361670127 | 0.000893 | 0.00156 | -1.81486997 |
| MYO6    | 0.304620842  | 5.05301539 | 3.360583401  | 0.000896 | 0.00157 | -1.81836694 |
| CPN2    | 0.040725901  | 0.05811922 | 3.360383131  | 0.000897 | 0.00157 | -1.81901127 |
| TANC2   | 0.237094704  | 1.98083134 | 3.35918711   | 0.000901 | 0.00157 | -1.82285853 |
| DACT3   | -0.25418692  | 1.43446538 | -3.35794242  | 0.000905 | 0.00158 | -1.82686102 |
| VCAM1   | 0.424247917  | 2.46620958 | 3.357616536  | 0.000906 | 0.00158 | -1.82790872 |
| THEMIS  | 0.24722003   | 0.63014123 | 3.357338352  | 0.000907 | 0.00158 | -1.828803   |
| NUP85   | -0.180718935 | 4.02989556 | -3.357096484 | 0.000907 | 0.00159 | -1.82958048 |
| FCRLA   | 0.424411181  | 0.62410193 | 3.357027096  | 0.000907 | 0.00159 | -1.82980351 |
| DCBLD2  | 0.314894922  | 4.89995682 | 3.356108757  | 0.00091  | 0.00159 | -1.83275496 |
| INSYN1  | -0.233441455 | 0.58407131 | -3.355570093 | 0.000912 | 0.00159 | -1.83448582 |
| GAS2L3  | 0.15318642   | 0.8684207  | 3.355022497  | 0.000914 | 0.0016  | -1.83624513 |
| IMPG1   | 0.104124651  | 0.36336073 | 3.353980696  | 0.000917 | 0.0016  | -1.83959149 |
| FCRL6   | 0.24891087   | 0.88322854 | 3.353884213  | 0.000917 | 0.0016  | -1.83990135 |
| DOCK3   | 0.355352705  | 4.35683973 | 3.352804276  | 0.000921 | 0.00161 | -1.84336911 |
| ZNF98   | -0.177759126 | 0.83543487 | -3.3524952   | 0.000922 | 0.00161 | -1.84436138 |
| MSH6    | -0.233779028 | 3.80208816 | -3.352131071 | 0.000923 | 0.00161 | -1.8455303  |
| CNTD1   | -0.122948521 | 0.77416315 | -3.351833908 | 0.000924 | 0.00161 | -1.84648415 |
| MEF2D   | -0.226435989 | 5.27673408 | -3.351097046 | 0.000926 | 0.00162 | -1.84884906 |
| ULBP3   | -0.465549231 | 3.0748957  | -3.349724703 | 0.000931 | 0.00162 | -1.85325222 |
| FADS6   | -0.09465344  | 0.09540216 | -3.349665144 | 0.000931 | 0.00162 | -1.85344328 |
| ZNF562  | -0.178220372 | 2.65231825 | -3.349278549 | 0.000932 | 0.00163 | -1.85468335 |

|         |              |            |              |          |         |             |
|---------|--------------|------------|--------------|----------|---------|-------------|
| GFRA2   | -0.565109032 | 3.77307642 | -3.349019515 | 0.000933 | 0.00163 | -1.85551417 |
| SMCO3   | -0.297662708 | 0.64690587 | -3.34893692  | 0.000933 | 0.00163 | -1.85577908 |
| FAM172F | -0.245293543 | 4.21104254 | -3.348466442 | 0.000935 | 0.00163 | -1.8572879  |
| LGALS3F | -0.339845796 | 8.86844393 | -3.347564665 | 0.000938 | 0.00164 | -1.86017936 |
| WNK4    | -0.082637403 | 0.21137319 | -3.346953938 | 0.00094  | 0.00164 | -1.86213718 |
| CLDN11  | 0.305153425  | 1.17668426 | 3.346951268  | 0.00094  | 0.00164 | -1.86214574 |
| EXOC4   | -0.228839055 | 4.76034234 | -3.346741312 | 0.00094  | 0.00164 | -1.86281873 |
| INCENP  | -0.32915194  | 3.40498227 | -3.346172438 | 0.000942 | 0.00164 | -1.86464199 |
| ZNF761  | -0.213618793 | 3.00563113 | -3.345934427 | 0.000943 | 0.00164 | -1.86540474 |
| HSP90A  | -0.275217816 | 8.51105485 | -3.3458959   | 0.000943 | 0.00164 | -1.8655282  |
| POLD3   | -0.211117395 | 3.30902843 | -3.344984668 | 0.000946 | 0.00165 | -1.86844791 |
| AEBP1   | 0.5228636    | 5.91008911 | 3.344431152  | 0.000948 | 0.00165 | -1.8702211  |
| HIST1H2 | -0.413124223 | 2.5027641  | -3.343637395 | 0.00095  | 0.00166 | -1.87276343 |
| LGI4    | -0.291012483 | 1.5142004  | -3.342932552 | 0.000953 | 0.00166 | -1.87502052 |
| SERPINE | 0.085180404  | 0.10009139 | 3.342826427  | 0.000953 | 0.00166 | -1.87536032 |
| ZNF205  | -0.208410479 | 4.59845709 | -3.342781169 | 0.000953 | 0.00166 | -1.87550522 |
| TUBA1B  | -0.353335747 | 6.3842673  | -3.342186908 | 0.000955 | 0.00166 | -1.87740778 |
| RPS20   | -0.235189276 | 9.73198742 | -3.342096436 | 0.000956 | 0.00166 | -1.8776974  |
| CARD14  | -0.155638699 | 0.44550707 | -3.341914144 | 0.000956 | 0.00167 | -1.87828094 |
| IL24    | 0.318124245  | 1.45611144 | 3.341825314  | 0.000956 | 0.00167 | -1.87856529 |
| MLXIP   | -0.262002891 | 4.88541674 | -3.341514171 | 0.000957 | 0.00167 | -1.8795612  |
| PLPPR4  | 0.223302232  | 0.91825536 | 3.341431925  | 0.000958 | 0.00167 | -1.87982444 |
| NCOA4   | -0.290718167 | 7.02939073 | -3.340563392 | 0.000961 | 0.00167 | -1.88260396 |
| CLEC16A | 0.239822117  | 3.87553875 | 3.340357764  | 0.000961 | 0.00167 | -1.88326192 |
| MAP1LC  | -0.145893501 | 1.70768028 | -3.340201135 | 0.000962 | 0.00167 | -1.88376308 |
| APC     | -0.264772738 | 2.78043218 | -3.339084242 | 0.000966 | 0.00168 | -1.88733608 |
| WHAMM   | -0.197123719 | 3.73675858 | -3.338324366 | 0.000968 | 0.00168 | -1.88976633 |
| ZNF276  | -0.199697606 | 2.85347516 | -3.338129067 | 0.000969 | 0.00169 | -1.89039086 |
| SIRPD   | 0.033331044  | 0.04972375 | 3.337910393  | 0.000969 | 0.00169 | -1.8910901  |
| ZMYM4   | -0.234166584 | 4.64726846 | -3.337733455 | 0.00097  | 0.00169 | -1.89165585 |
| ACSS3   | -0.31703077  | 3.06070297 | -3.337704387 | 0.00097  | 0.00169 | -1.89174879 |
| PLA2G6  | -0.369587584 | 3.44594576 | -3.337216364 | 0.000972 | 0.00169 | -1.89330907 |
| GPRASP  | -0.360745589 | 4.44823593 | -3.336567401 | 0.000974 | 0.00169 | -1.89538357 |
| CDRT1   | -0.104663496 | 0.13485929 | -3.336099863 | 0.000976 | 0.0017  | -1.89687789 |
| PREX1   | -0.265615581 | 4.46419663 | -3.335754488 | 0.000977 | 0.0017  | -1.89798164 |
| KATNBL  | -0.182651988 | 2.92115845 | -3.335492437 | 0.000978 | 0.0017  | -1.89881903 |
| SLX4    | -0.175809724 | 1.90388128 | -3.335200147 | 0.000979 | 0.0017  | -1.89975298 |
| OR2A1   | -0.08610086  | 0.18111147 | -3.334664512 | 0.00098  | 0.0017  | -1.90146429 |
| EFEMP1  | -0.579527717 | 5.25764483 | -3.334301351 | 0.000982 | 0.00171 | -1.90262441 |
| SNX18   | -0.300682709 | 5.11093078 | -3.333942923 | 0.000983 | 0.00171 | -1.90376931 |



|         |              |            |              |          |         |             |
|---------|--------------|------------|--------------|----------|---------|-------------|
| PBX2    | -0.252923738 | 5.81298895 | -3.33191015  | 0.00099  | 0.00172 | -1.91026027 |
| GPR161  | 0.290523106  | 1.92233351 | 3.331890865  | 0.00099  | 0.00172 | -1.91032183 |
| ZNF567  | -0.20767173  | 2.3990042  | -3.33169318  | 0.00099  | 0.00172 | -1.91095288 |
| CD163   | 0.49433347   | 3.29843473 | 3.331605001  | 0.000991 | 0.00172 | -1.91123434 |
| GRTP1   | -0.293771556 | 2.12871491 | -3.33085717  | 0.000993 | 0.00173 | -1.91362117 |
| CMTR2   | -0.275848509 | 3.65320461 | -3.329475799 | 0.000998 | 0.00173 | -1.91802876 |
| RUNX3   | 0.432076241  | 1.84155093 | 3.329424971  | 0.000998 | 0.00173 | -1.91819091 |
| RENBP   | 0.496479806  | 4.07055176 | 3.329067034  | 0.000999 | 0.00174 | -1.9193327  |
| CBR3    | 0.420433774  | 3.36302838 | 3.327521031  | 0.001005 | 0.00174 | -1.92426304 |
| SLC39A1 | -0.198146554 | 0.20053458 | -3.327246328 | 0.001006 | 0.00175 | -1.92513887 |
| PSMB8   | 0.344190254  | 6.73043002 | 3.327132106  | 0.001006 | 0.00175 | -1.92550302 |
| GTDC1   | -0.187191191 | 2.5389903  | -3.327115463 | 0.001006 | 0.00175 | -1.92555608 |
| ZNF7    | -0.183796477 | 2.71447043 | -3.326452115 | 0.001008 | 0.00175 | -1.92767068 |
| MSH4    | 0.066455997  | 0.15704865 | 3.326345734  | 0.001009 | 0.00175 | -1.92800976 |
| RBM24   | -0.210536265 | 0.54458409 | -3.326231022 | 0.001009 | 0.00175 | -1.92837539 |
| MFSD14L | -0.217129462 | 2.51081078 | -3.325920333 | 0.00101  | 0.00175 | -1.92936559 |
| ZNF426  | -0.204749705 | 3.22693974 | -3.325741892 | 0.001011 | 0.00175 | -1.92993427 |
| CARMIL2 | 0.266129745  | 0.64547739 | 3.32557679   | 0.001011 | 0.00175 | -1.93046041 |
| PMEPA1  | 0.30344285   | 4.99818538 | 3.325391683  | 0.001012 | 0.00176 | -1.93105028 |
| DCAF7   | -0.261200294 | 5.73130368 | -3.325120386 | 0.001013 | 0.00176 | -1.93191475 |
| FIGN    | 0.159479355  | 0.69348814 | 3.324902468  | 0.001014 | 0.00176 | -1.93260908 |
| TOP2B   | -0.284507471 | 6.49582795 | -3.324561514 | 0.001015 | 0.00176 | -1.93369534 |
| GSTT2B  | -0.440699394 | 2.51091912 | -3.323720181 | 0.001018 | 0.00177 | -1.93637536 |
| ZNF184  | -0.240703413 | 3.27339891 | -3.322960166 | 0.001021 | 0.00177 | -1.93879581 |
| SMIM10L | -0.258346671 | 1.78496655 | -3.322521394 | 0.001022 | 0.00177 | -1.94019295 |
| EMX1    | -0.086938639 | 0.06835357 | -3.322343034 | 0.001023 | 0.00177 | -1.94076084 |
| AFF1    | -0.344615053 | 6.32058083 | -3.320565834 | 0.001029 | 0.00178 | -1.9464178  |
| ZNF443  | -0.183748511 | 2.23334039 | -3.320471427 | 0.001029 | 0.00178 | -1.94671823 |
| ZNF557  | -0.183369016 | 2.37628609 | -3.319766639 | 0.001032 | 0.00179 | -1.9489608  |
| RPGRIP1 | -0.180847127 | 1.66835274 | -3.319685464 | 0.001032 | 0.00179 | -1.94921906 |
| MLPH    | 0.479356259  | 4.38878341 | 3.319222704  | 0.001034 | 0.00179 | -1.95069125 |
| ZC3H11A | -0.254663243 | 5.21068301 | -3.318774507 | 0.001035 | 0.00179 | -1.95211693 |
| GSDME   | -0.288619502 | 3.09806778 | -3.318266542 | 0.001037 | 0.0018  | -1.95373251 |
| OMD     | 0.52350256   | 1.40863828 | 3.317321324  | 0.001041 | 0.0018  | -1.95673818 |
| STX1A   | -0.156882538 | 1.66083262 | -3.317161133 | 0.001041 | 0.0018  | -1.95724748 |
| CTNNA3  | -0.054451304 | 0.10095311 | -3.316624864 | 0.001043 | 0.00181 | -1.95895232 |
| KLF16   | 0.262835914  | 3.81730541 | 3.315728069  | 0.001046 | 0.00181 | -1.96180273 |
| IKBIP   | -0.261246982 | 4.06014699 | -3.3153061   | 0.001048 | 0.00181 | -1.96314369 |
| EFHD1   | -0.400662865 | 4.10566561 | -3.314590039 | 0.00105  | 0.00182 | -1.96541887 |
| RASA3   | -0.284668603 | 4.66951396 | -3.314379155 | 0.001051 | 0.00182 | -1.96608884 |

|         |              |            |              |          |         |             |
|---------|--------------|------------|--------------|----------|---------|-------------|
| MTMR6   | -0.265813024 | 4.26310935 | -3.314378368 | 0.001051 | 0.00182 | -1.96609134 |
| CDH23   | 0.114285205  | 0.51746016 | 3.314259544  | 0.001052 | 0.00182 | -1.96646882 |
| RASSF6  | -0.399254709 | 1.03812242 | -3.313769375 | 0.001053 | 0.00182 | -1.96802586 |
| ZNF692  | -0.297778509 | 3.975256   | -3.313721887 | 0.001054 | 0.00182 | -1.9681767  |
| SWT1    | -0.190678997 | 2.40623829 | -3.313559894 | 0.001054 | 0.00182 | -1.96869122 |
| LIX1    | -0.673785422 | 1.89153241 | -3.313460268 | 0.001054 | 0.00182 | -1.96900764 |
| TMEM53  | -0.179230132 | 3.44232942 | -3.313428549 | 0.001055 | 0.00182 | -1.96910838 |
| NRSN1   | -0.285205451 | 0.44811044 | -3.31266557  | 0.001057 | 0.00183 | -1.97153136 |
| RNF126  | -0.192731991 | 4.37261471 | -3.31208624  | 0.001059 | 0.00183 | -1.97337079 |
| ARHGAP  | 0.225578036  | 2.78375583 | 3.311730807  | 0.001061 | 0.00183 | -1.97449918 |
| MAP3K1  | 0.355554942  | 5.49557863 | 3.311616011  | 0.001061 | 0.00183 | -1.9748636  |
| ABHD18  | -0.190942496 | 2.67803519 | -3.311357848 | 0.001062 | 0.00184 | -1.97568309 |
| GALR2   | 0.185845674  | 0.56582912 | 3.310409999  | 0.001066 | 0.00184 | -1.97869136 |
| JAKMIP2 | 0.067037086  | 0.14298491 | 3.310404404  | 0.001066 | 0.00184 | -1.97870911 |
| GTF2A1  | -0.306420661 | 5.10295939 | -3.310287002 | 0.001066 | 0.00184 | -1.97908167 |
| STARD3  | -0.211090577 | 5.04227279 | -3.310178966 | 0.001066 | 0.00184 | -1.97942449 |
| RASA2   | 0.265323777  | 3.23666647 | 3.309486005  | 0.001069 | 0.00185 | -1.98162315 |
| SSTR1   | -0.13659874  | 0.41568944 | -3.308820803 | 0.001071 | 0.00185 | -1.98373335 |
| LDOC1   | -0.292967513 | 7.79377025 | -3.308741174 | 0.001072 | 0.00185 | -1.98398593 |
| SARM1   | -0.194465299 | 1.7461469  | -3.307965914 | 0.001074 | 0.00186 | -1.98644471 |
| LRRC9   | -0.039467512 | 0.04826085 | -3.30736491  | 0.001077 | 0.00186 | -1.98835047 |
| BPIFB1  | 0.222933991  | 0.28898991 | 3.306619317  | 0.001079 | 0.00186 | -1.99071427 |
| CALR3   | -0.036859752 | 0.07028895 | -3.306412119 | 0.00108  | 0.00187 | -1.99137107 |
| PAH     | -0.116319697 | 0.24777682 | -3.305576519 | 0.001083 | 0.00187 | -1.99401949 |
| SEC61A  | -0.197895186 | 2.489974   | -3.305575246 | 0.001083 | 0.00187 | -1.99402353 |
| FGFR1   | -0.3404305   | 3.49894991 | -3.305309723 | 0.001084 | 0.00187 | -1.99486497 |
| FAM43A  | 0.481176686  | 5.05347745 | 3.30517326   | 0.001085 | 0.00187 | -1.9952974  |
| EPHA8   | -0.050797297 | 0.05045109 | -3.304948402 | 0.001086 | 0.00187 | -1.99600989 |
| MMP3    | 0.220344183  | 0.23199941 | 3.304558713  | 0.001087 | 0.00188 | -1.99724458 |
| MCM3AF  | -0.235898845 | 4.43192251 | -3.304436453 | 0.001088 | 0.00188 | -1.99763192 |
| NT5DC3  | 0.291091059  | 2.07962028 | 3.304262033  | 0.001088 | 0.00188 | -1.99818449 |
| MTG1    | -0.207775039 | 2.37287199 | -3.303785241 | 0.00109  | 0.00188 | -1.99969485 |
| EXOSC8  | -0.192387554 | 3.96486731 | -3.30341701  | 0.001091 | 0.00188 | -2.00086117 |
| FAM83E  | 0.255481238  | 0.34994047 | 3.303338657  | 0.001092 | 0.00188 | -2.00110933 |
| ZNF577  | -0.250124918 | 2.81489647 | -3.302413058 | 0.001095 | 0.00189 | -2.00404046 |
| CPNE8   | -0.245906222 | 2.66260325 | -3.302095377 | 0.001096 | 0.00189 | -2.0050463  |
| VWA2    | 0.293790371  | 1.43610049 | 3.301992915  | 0.001097 | 0.00189 | -2.0053707  |
| FAM133A | -0.144122324 | 0.34888108 | -3.300791942 | 0.001101 | 0.0019  | -2.0091723  |
| VWA8    | -0.246628214 | 3.46638327 | -3.300257672 | 0.001103 | 0.0019  | -2.01086309 |
| ZNF335  | -0.214649427 | 3.63878352 | -3.300246055 | 0.001103 | 0.0019  | -2.01089985 |

|         |              |            |              |          |         |             |
|---------|--------------|------------|--------------|----------|---------|-------------|
| NFKB1   | -0.2850998   | 4.76378383 | -3.297850739 | 0.001112 | 0.00192 | -2.01847712 |
| SLC25A3 | -0.279710276 | 2.93325887 | -3.297747904 | 0.001113 | 0.00192 | -2.01880231 |
| C2orf50 | -0.077784166 | 0.24400893 | -3.297468182 | 0.001114 | 0.00192 | -2.01968682 |
| INPP5K  | -0.2268894   | 5.68181056 | -3.297185956 | 0.001115 | 0.00192 | -2.02057918 |
| PSEN1   | -0.202393729 | 4.81817505 | -3.295887102 | 0.00112  | 0.00193 | -2.02468506 |
| COTL1   | -0.269780267 | 5.32481618 | -3.295642616 | 0.001121 | 0.00193 | -2.02545775 |
| KLF5    | 0.465436214  | 5.7814681  | 3.295144933  | 0.001123 | 0.00193 | -2.0270305  |
| SLC13A3 | -0.356591767 | 1.65527659 | -3.294697984 | 0.001124 | 0.00194 | -2.02844275 |
| PPP2R2I | -0.193540816 | 0.67972254 | -3.293538259 | 0.001129 | 0.00194 | -2.03210635 |
| FARP2   | -0.186178179 | 1.7207408  | -3.292444132 | 0.001133 | 0.00195 | -2.03556164 |
| PITPNM1 | -0.28121269  | 4.8249937  | -3.292118986 | 0.001134 | 0.00195 | -2.03658826 |
| LVRN    | 0.028403234  | 0.07136892 | 3.291404415  | 0.001137 | 0.00196 | -2.03884413 |
| EFNB2   | -0.341195778 | 4.75810205 | -3.290940972 | 0.001139 | 0.00196 | -2.04030696 |
| TAF1B   | -0.244452584 | 3.50650609 | -3.290692807 | 0.00114  | 0.00196 | -2.04109019 |
| IGF2    | 0.642858316  | 2.73240475 | 3.290585438  | 0.00114  | 0.00196 | -2.04142905 |
| CD300E  | 0.237909624  | 0.80640004 | 3.288926793  | 0.001147 | 0.00197 | -2.04666238 |
| RELL1   | 0.494703423  | 3.14921091 | 3.288592209  | 0.001148 | 0.00198 | -2.04771776 |
| ACER3   | -0.194497216 | 2.95307193 | -3.287638444 | 0.001152 | 0.00198 | -2.05072569 |
| NME2    | -0.248118257 | 5.72197312 | -3.285555339 | 0.00116  | 0.002   | -2.05729247 |
| AFAP1   | 0.334067112  | 4.1381718  | 3.285330679  | 0.001161 | 0.002   | -2.05800046 |
| WAPL    | -0.241475012 | 4.59363588 | -3.285079673 | 0.001162 | 0.002   | -2.05879143 |
| RUFY1   | -0.161797195 | 5.22065988 | -3.28492094  | 0.001162 | 0.002   | -2.0592916  |
| MZT1    | -0.218253912 | 4.41974141 | -3.284794073 | 0.001163 | 0.002   | -2.05969134 |
| BBS2    | -0.217179602 | 4.35759143 | -3.283314613 | 0.001169 | 0.00201 | -2.06435187 |
| GPRC5C  | -0.23916192  | 6.04119874 | -3.282231536 | 0.001173 | 0.00202 | -2.06776252 |
| USP45   | -0.177177278 | 2.09795629 | -3.281951468 | 0.001174 | 0.00202 | -2.06864429 |
| ZNF91   | -0.240164042 | 3.02621287 | -3.281058973 | 0.001178 | 0.00202 | -2.07145379 |
| NFKBIE  | 0.271708954  | 4.12271892 | 3.280954517  | 0.001178 | 0.00203 | -2.07178256 |
| LEFTY1  | -0.0510361   | 0.11701248 | -3.280757354 | 0.001179 | 0.00203 | -2.0724031  |
| NBPF3   | -0.271782763 | 2.02506245 | -3.280561848 | 0.00118  | 0.00203 | -2.07301839 |
| TTC17   | -0.248841488 | 4.64771006 | -3.280524095 | 0.00118  | 0.00203 | -2.0731372  |
| SMTNL2  | -0.203978272 | 0.42568066 | -3.28040887  | 0.00118  | 0.00203 | -2.07349982 |
| CFD     | -0.420440288 | 4.33066399 | -3.279597353 | 0.001184 | 0.00203 | -2.07605333 |
| DDX6    | -0.252223752 | 5.30938232 | -3.279521918 | 0.001184 | 0.00203 | -2.07629066 |
| RASL10A | -0.162629545 | 0.69755224 | -3.278938005 | 0.001186 | 0.00204 | -2.0781276  |
| HMOX1   | 0.439508958  | 4.87603689 | 3.278867228  | 0.001187 | 0.00204 | -2.07835023 |
| P2RY13  | 0.341740378  | 1.93803247 | 3.278285024  | 0.001189 | 0.00204 | -2.08018146 |
| RMC1    | -0.152904565 | 4.23360624 | -3.278215892 | 0.001189 | 0.00204 | -2.08039888 |
| VPS33A  | -0.154721741 | 3.05190598 | -3.277286304 | 0.001193 | 0.00205 | -2.08332207 |
| ZNF552  | -0.175770856 | 2.23922335 | -3.276287082 | 0.001197 | 0.00206 | -2.08646338 |

|         |              |            |              |          |         |             |
|---------|--------------|------------|--------------|----------|---------|-------------|
| NANOS1  | -0.376223352 | 3.54208642 | -3.275679235 | 0.0012   | 0.00206 | -2.08837387 |
| SPHKAP  | -0.186377486 | 0.14650171 | -3.274461005 | 0.001205 | 0.00207 | -2.09220184 |
| SMPD3   | -0.167127112 | 0.82942137 | -3.2737451   | 0.001207 | 0.00207 | -2.09445077 |
| DEPDC5  | -0.200688977 | 2.64254481 | -3.273665557 | 0.001208 | 0.00207 | -2.09470062 |
| COPA    | -0.257039958 | 6.90943757 | -3.273054739 | 0.00121  | 0.00208 | -2.09661904 |
| STK36   | -0.261121906 | 3.60794863 | -3.272781823 | 0.001211 | 0.00208 | -2.09747609 |
| BTN3A1  | 0.320402991  | 3.74821538 | 3.272556591  | 0.001212 | 0.00208 | -2.09818334 |
| DGKG    | -0.22381729  | 0.69291152 | -3.271608754 | 0.001216 | 0.00209 | -2.10115918 |
| MED16   | -0.193739723 | 5.51986712 | -3.271499753 | 0.001217 | 0.00209 | -2.10150135 |
| HIST1H4 | -0.27019573  | 1.22965266 | -3.270152386 | 0.001222 | 0.0021  | -2.10573005 |
| BRIP1   | 0.13202798   | 0.59949638 | 3.269852367  | 0.001223 | 0.0021  | -2.10667144 |
| SCAPER  | -0.281047003 | 3.12300127 | -3.269520735 | 0.001225 | 0.0021  | -2.10771193 |
| ZNF548  | -0.194321418 | 3.07869981 | -3.268887891 | 0.001228 | 0.0021  | -2.10969721 |
| FND10   | -0.364565112 | 5.07405555 | -3.267281245 | 0.001234 | 0.00212 | -2.11473577 |
| ATXN7L3 | -0.209294736 | 5.27855736 | -3.267262126 | 0.001234 | 0.00212 | -2.11479572 |
| BCL2L11 | -0.289282022 | 4.01527104 | -3.267238202 | 0.001234 | 0.00212 | -2.11487073 |
| TTLL5   | -0.178353555 | 2.87488016 | -3.266736552 | 0.001236 | 0.00212 | -2.11644346 |
| ORM1    | -0.348765535 | 0.84984057 | -3.266723045 | 0.001237 | 0.00212 | -2.1164858  |
| GPR174  | 0.310936218  | 0.69433104 | 3.266712086  | 0.001237 | 0.00212 | -2.11652015 |
| TIFAB   | 0.127123756  | 0.19746202 | 3.266696742  | 0.001237 | 0.00212 | -2.11656825 |
| NOS1    | -0.183516857 | 0.17204207 | -3.266340406 | 0.001238 | 0.00212 | -2.11768526 |
| MITF    | -0.262845271 | 3.32287216 | -3.266259944 | 0.001238 | 0.00212 | -2.11793747 |
| EPHB2   | -0.29297722  | 2.97549343 | -3.265970276 | 0.00124  | 0.00212 | -2.11884538 |
| KLHL41  | -0.263239961 | 0.86029486 | -3.265941212 | 0.00124  | 0.00212 | -2.11893648 |
| RELB    | 0.280298001  | 4.22646073 | 3.265451357  | 0.001242 | 0.00213 | -2.12047167 |
| LONP2   | -0.236027634 | 5.39710739 | -3.26413463  | 0.001247 | 0.00214 | -2.1245972  |
| CHEK1   | -0.165855715 | 2.07763318 | -3.263827245 | 0.001249 | 0.00214 | -2.12556007 |
| CDK2AP  | -0.254160943 | 5.3401158  | -3.262255637 | 0.001255 | 0.00215 | -2.13048176 |
| PHLDA2  | 0.528270025  | 5.37989173 | 3.260442724  | 0.001263 | 0.00216 | -2.13615641 |
| FAM186A | -0.045980432 | 0.18891325 | -3.260227181 | 0.001264 | 0.00216 | -2.1368309  |
| GSDMC   | -0.307438535 | 0.69489856 | -3.260027213 | 0.001265 | 0.00216 | -2.13745661 |
| CD4     | 0.41784594   | 4.43609446 | 3.258880839  | 0.00127  | 0.00217 | -2.14104299 |
| SPRY2   | -0.344075751 | 4.47470103 | -3.257989423 | 0.001274 | 0.00218 | -2.14383095 |
| SNTB1   | -0.296104024 | 5.70776291 | -3.257787349 | 0.001275 | 0.00218 | -2.14446285 |
| PABPC4  | 0.274271606  | 1.99101883 | 3.257765445  | 0.001275 | 0.00218 | -2.14453134 |
| GLG1    | -0.240080175 | 5.86172797 | -3.257453511 | 0.001276 | 0.00218 | -2.14550671 |
| BACH1   | 0.295963811  | 3.82255121 | 3.256937517  | 0.001278 | 0.00219 | -2.14711994 |
| DTX1    | -0.319915153 | 3.13067576 | -3.256263249 | 0.001281 | 0.00219 | -2.14922766 |
| ARMCX4  | -0.250803093 | 2.39827612 | -3.256228407 | 0.001281 | 0.00219 | -2.14933657 |
| ABHD11  | -0.188865227 | 6.33367653 | -3.256057902 | 0.001282 | 0.00219 | -2.14986948 |

|         |              |            |              |          |         |             |
|---------|--------------|------------|--------------|----------|---------|-------------|
| LMX1A   | -0.034583386 | 0.0472803  | -3.255531553 | 0.001284 | 0.0022  | -2.15151444 |
| ITGA6   | -0.292418457 | 5.21522919 | -3.254795701 | 0.001287 | 0.0022  | -2.15381374 |
| CYTH4   | 0.366619213  | 2.07792658 | 3.253668929  | 0.001292 | 0.00221 | -2.1573336  |
| ECEL1   | -0.446203899 | 1.46251124 | -3.253653999 | 0.001292 | 0.00221 | -2.15738023 |
| FADS3   | 0.228154474  | 2.9908129  | 3.253563455  | 0.001293 | 0.00221 | -2.15766303 |
| PPHLN1  | -0.167978653 | 3.49735717 | -3.253443789 | 0.001293 | 0.00221 | -2.15803677 |
| THOC1   | -0.217726159 | 3.16063006 | -3.253283858 | 0.001294 | 0.00221 | -2.15853625 |
| PCDH7   | -0.507241905 | 2.77658038 | -3.253131561 | 0.001295 | 0.00221 | -2.15901186 |
| CRTAM   | 0.303825537  | 0.83287654 | 3.252822877  | 0.001296 | 0.00221 | -2.1599758  |
| ALPL    | -0.399000987 | 4.04847376 | -3.251347409 | 0.001303 | 0.00223 | -2.16458214 |
| SC5D    | -0.251357637 | 4.44006295 | -3.251135626 | 0.001304 | 0.00223 | -2.16524316 |
| CD93    | -0.359891115 | 5.09049244 | -3.250559252 | 0.001306 | 0.00223 | -2.16704193 |
| ADA     | -0.238818578 | 2.59105165 | -3.250364921 | 0.001307 | 0.00223 | -2.16764835 |
| CYP2R1  | -0.193086174 | 2.47530028 | -3.249486951 | 0.001311 | 0.00224 | -2.17038765 |
| MTDH    | -0.285043633 | 5.78477618 | -3.249178945 | 0.001312 | 0.00224 | -2.17134848 |
| TESPA1  | 0.273488284  | 0.89045629 | 3.248316251  | 0.001316 | 0.00225 | -2.17403922 |
| AP2B1   | -0.239288963 | 6.85641402 | -3.24804716  | 0.001317 | 0.00225 | -2.17487838 |
| LAP3    | -0.306313767 | 5.85336749 | -3.247416214 | 0.00132  | 0.00225 | -2.17684574 |
| BCOR    | -0.305280222 | 4.12008166 | -3.247369072 | 0.00132  | 0.00225 | -2.17699272 |
| B4GALT  | 0.35367798   | 5.16091298 | 3.247071556  | 0.001322 | 0.00226 | -2.17792027 |
| ZXDB    | -0.223069857 | 2.96553136 | -3.244599949 | 0.001333 | 0.00227 | -2.18562285 |
| FNDC1   | -0.664823345 | 5.87132271 | -3.244105893 | 0.001335 | 0.00228 | -2.18716189 |
| PCDHA1  | -0.156589884 | 0.23083976 | -3.244065348 | 0.001335 | 0.00228 | -2.18728818 |
| CAMKK1  | -0.280347254 | 3.58225755 | -3.244017608 | 0.001335 | 0.00228 | -2.18743689 |
| EHBP1   | 0.305973529  | 3.98829477 | 3.242923232  | 0.00134  | 0.00229 | -2.19084514 |
| MTMR9   | -0.191705373 | 2.70171857 | -3.242527083 | 0.001342 | 0.00229 | -2.19207862 |
| PPP3CB  | -0.203292467 | 5.08924414 | -3.241874708 | 0.001345 | 0.00229 | -2.1941096  |
| NEUROG  | -0.14003778  | 0.1319179  | -3.239707642 | 0.001355 | 0.00231 | -2.20085344 |
| SEMA6B  | -0.322451542 | 3.20507891 | -3.239523408 | 0.001356 | 0.00231 | -2.20142658 |
| TXLNB   | 0.162079601  | 0.33418544 | 3.23902822   | 0.001358 | 0.00231 | -2.20296692 |
| FMO3    | 0.237314993  | 1.0584336  | 3.237603495  | 0.001364 | 0.00233 | -2.2073975  |
| ARHGAP  | 0.320006501  | 3.26822004 | 3.237585956  | 0.001364 | 0.00233 | -2.20745203 |
| IRF2BPL | -0.26504991  | 5.78857553 | -3.236945046 | 0.001367 | 0.00233 | -2.20944452 |
| EPB41   | -0.30261452  | 3.71206059 | -3.236729304 | 0.001368 | 0.00233 | -2.21011515 |
| FLVCR1  | -0.176443058 | 2.44572611 | -3.236156413 | 0.001371 | 0.00234 | -2.21189576 |
| BCL2L13 | -0.233311469 | 4.59331054 | -3.235687217 | 0.001373 | 0.00234 | -2.21335386 |
| MSH5    | 0.141841567  | 0.69854912 | 3.235097712  | 0.001376 | 0.00234 | -2.21518557 |
| TBRG1   | -0.20336641  | 3.72718416 | -3.233693073 | 0.001382 | 0.00235 | -2.21954881 |
| SEC14L1 | -0.269999644 | 4.8965869  | -3.233677751 | 0.001382 | 0.00235 | -2.2195964  |
| HOOK1   | -0.302084224 | 4.23445947 | -3.233471581 | 0.001383 | 0.00236 | -2.22023667 |

|          |              |            |              |          |         |             |
|----------|--------------|------------|--------------|----------|---------|-------------|
| PLPP7    | -0.165445742 | 0.99807367 | -3.233279808 | 0.001384 | 0.00236 | -2.22083221 |
| ELMO2    | -0.221667916 | 4.88331041 | -3.233054154 | 0.001385 | 0.00236 | -2.22153291 |
| RNASE1   | 0.11182298   | 0.28172844 | 3.232991309  | 0.001386 | 0.00236 | -2.22172805 |
| PATL2    | 0.189998477  | 0.79618557 | 3.232609576  | 0.001387 | 0.00236 | -2.2229133  |
| TCTE3    | -0.250052237 | 1.95156638 | -3.232570856 | 0.001388 | 0.00236 | -2.22303351 |
| ATF6     | -0.265873861 | 4.75862763 | -3.232207438 | 0.001389 | 0.00236 | -2.22416176 |
| CYP1A2   | -0.360529124 | 1.46137227 | -3.231206114 | 0.001394 | 0.00237 | -2.22726979 |
| C17orf67 | -0.144482901 | 1.23749155 | -3.230776737 | 0.001396 | 0.00238 | -2.22860228 |
| IQSEC2   | -0.153400731 | 3.29339213 | -3.230069942 | 0.001399 | 0.00238 | -2.23079532 |
| MICU1    | -0.15599419  | 5.28106872 | -3.229971651 | 0.0014   | 0.00238 | -2.23110026 |
| ESRP1    | -0.279141509 | 5.56449784 | -3.229910075 | 0.0014   | 0.00238 | -2.23129129 |
| YLPM1    | -0.260500964 | 4.07595347 | -3.227900247 | 0.00141  | 0.0024  | -2.23752467 |
| PUM1     | -0.242114588 | 5.66262365 | -3.227009236 | 0.001414 | 0.0024  | -2.24028696 |
| ATP9B    | -0.203845186 | 2.73897303 | -3.225857047 | 0.001419 | 0.00241 | -2.24385789 |
| SRSF5    | -0.278898218 | 6.91225483 | -3.225408598 | 0.001421 | 0.00242 | -2.24524744 |
| KANSL1   | -0.240088211 | 3.85979496 | -3.225058527 | 0.001423 | 0.00242 | -2.24633203 |
| DRC7     | -0.071941507 | 0.10112563 | -3.224699327 | 0.001425 | 0.00242 | -2.24744479 |
| MCOLN3   | 0.340271299  | 1.78677636 | 3.223908971  | 0.001429 | 0.00243 | -2.24989282 |
| SULF2    | 0.373333038  | 5.20006621 | 3.223765901  | 0.001429 | 0.00243 | -2.2503359  |
| KISS1    | 0.268194828  | 0.61578009 | 3.223075184  | 0.001433 | 0.00243 | -2.25247477 |
| KLHL32   | 0.252820521  | 1.11392049 | 3.222862867  | 0.001434 | 0.00244 | -2.25313214 |
| OGFRL1   | 0.275604119  | 3.31056985 | 3.222733302  | 0.001434 | 0.00244 | -2.25353329 |
| FAT1     | -0.424887353 | 3.71242493 | -3.222169753 | 0.001437 | 0.00244 | -2.25527788 |
| MTRNR2   | 0.114817764  | 0.29455998 | 3.222047135  | 0.001438 | 0.00244 | -2.25565744 |
| CCZ1     | -0.176329634 | 1.79246846 | -3.22180237  | 0.001439 | 0.00244 | -2.25641505 |
| SLC6A1   | -0.291471304 | 1.00894966 | -3.219677285 | 0.001449 | 0.00246 | -2.26299054 |
| EIF3L    | -0.41964821  | 6.94404283 | -3.219165419 | 0.001451 | 0.00247 | -2.26457377 |
| SNX7     | -0.27274315  | 4.49427909 | -3.218225692 | 0.001456 | 0.00247 | -2.26747979 |
| HDAC7    | -0.211465637 | 5.19387057 | -3.21741119  | 0.00146  | 0.00248 | -2.26999793 |
| FRMD6    | 0.287378308  | 2.06808595 | 3.216782313  | 0.001463 | 0.00248 | -2.27194179 |
| EIF3H    | -0.202143284 | 6.6319938  | -3.216143941 | 0.001466 | 0.00249 | -2.27391463 |
| CEP44    | -0.198243676 | 2.77683671 | -3.215913642 | 0.001467 | 0.00249 | -2.27462627 |
| DVL1     | 0.236436847  | 6.51512118 | 3.215637205  | 0.001469 | 0.00249 | -2.27548041 |
| TRAIP    | -0.183691249 | 1.80398154 | -3.214891456 | 0.001472 | 0.0025  | -2.2777843  |
| BMX      | -0.314049486 | 1.33479159 | -3.214714161 | 0.001473 | 0.0025  | -2.27833196 |
| TMEM26   | -0.19510055  | 3.3153133  | -3.213185158 | 0.001481 | 0.00251 | -2.28305384 |
| LUZP1    | -0.264189436 | 3.88120835 | -3.212140159 | 0.001486 | 0.00252 | -2.28627982 |
| ANKRD3   | 0.150669281  | 0.77282049 | 3.21166513   | 0.001488 | 0.00253 | -2.28774594 |
| TRIM44   | -0.237007827 | 4.4651146  | -3.211451045 | 0.001489 | 0.00253 | -2.28840663 |
| PURA     | -0.256473969 | 3.87765465 | -3.211288291 | 0.00149  | 0.00253 | -2.28890888 |

|         |              |            |              |          |         |             |
|---------|--------------|------------|--------------|----------|---------|-------------|
| PLEKHG  | 0.24881021   | 3.07068595 | 3.209610868  | 0.001499 | 0.00254 | -2.2940839  |
| NAA15   | -0.210018583 | 3.40011163 | -3.208690537 | 0.001503 | 0.00255 | -2.29692216 |
| KRTCAP  | -0.349693165 | 4.99421451 | -3.208577059 | 0.001504 | 0.00255 | -2.29727207 |
| PRKAA1  | -0.255091855 | 4.84632508 | -3.208347708 | 0.001505 | 0.00255 | -2.29797924 |
| ABCC1   | -0.296073154 | 4.75208559 | -3.208016915 | 0.001507 | 0.00255 | -2.2989991  |
| SOWAHF  | 0.407515216  | 3.26371115 | 3.207821223  | 0.001508 | 0.00256 | -2.29960239 |
| TCP11L1 | 0.196152522  | 1.88289282 | 3.207748639  | 0.001508 | 0.00256 | -2.29982615 |
| ZNF365  | 0.155620816  | 0.60651876 | 3.2069677    | 0.001512 | 0.00256 | -2.30223329 |
| C1S     | 0.708199696  | 4.04301122 | 3.205488835  | 0.001519 | 0.00258 | -2.30679021 |
| STK10   | -0.231244042 | 3.21933886 | -3.205390969 | 0.00152  | 0.00258 | -2.3070917  |
| BRAF    | -0.213722725 | 3.75209277 | -3.205047575 | 0.001522 | 0.00258 | -2.30814952 |
| RNF122  | -0.284361619 | 2.99386784 | -3.204605411 | 0.001524 | 0.00258 | -2.30951143 |
| ERC1    | -0.281454712 | 3.90068861 | -3.203674294 | 0.001529 | 0.00259 | -2.31237882 |
| CSNK1G  | -0.21159982  | 3.81069137 | -3.203475424 | 0.00153  | 0.00259 | -2.31299114 |
| ZNF765  | -0.143274125 | 1.44496013 | -3.202305365 | 0.001536 | 0.0026  | -2.31659305 |
| CD58    | 0.240347948  | 4.42928323 | 3.202212995  | 0.001536 | 0.0026  | -2.31687735 |
| XCR1    | 0.225735713  | 0.38865168 | 3.201979293  | 0.001537 | 0.0026  | -2.31759662 |
| ZRANB2  | -0.275049423 | 5.59259623 | -3.200991485 | 0.001542 | 0.00261 | -2.32063626 |
| LDLRAD  | -0.377513442 | 2.47569339 | -3.200759452 | 0.001544 | 0.00261 | -2.32135013 |
| NREP    | -0.294880466 | 3.01749987 | -3.200744925 | 0.001544 | 0.00261 | -2.32139483 |
| TMEM13  | -0.267968772 | 1.12532821 | -3.200624703 | 0.001544 | 0.00261 | -2.32176468 |
| GFPT2   | 0.413531694  | 1.92174037 | 3.199944634  | 0.001548 | 0.00262 | -2.32385664 |
| GAB2    | 0.319492188  | 3.71975506 | 3.198891656  | 0.001553 | 0.00263 | -2.32709489 |
| DDHD2   | -0.214707111 | 3.48424192 | -3.19879017  | 0.001554 | 0.00263 | -2.32740694 |
| C1QL1   | 0.637601522  | 2.40750596 | 3.197846438  | 0.001559 | 0.00264 | -2.3303083  |
| RCN1    | -0.212805995 | 4.94814869 | -3.196545474 | 0.001565 | 0.00265 | -2.33430662 |
| AARS2   | -0.179846065 | 3.76510553 | -3.195640702 | 0.00157  | 0.00266 | -2.33708641 |
| ZNF778  | -0.201689508 | 2.40697247 | -3.195545826 | 0.001571 | 0.00266 | -2.33737787 |
| TOPORS  | -0.240951379 | 4.48537134 | -3.195425285 | 0.001571 | 0.00266 | -2.33774815 |
| DYRK1B  | -0.202661048 | 5.02109265 | -3.195053714 | 0.001573 | 0.00266 | -2.33888947 |
| B3GNT5  | 0.248663289  | 1.94610039 | 3.195045129  | 0.001573 | 0.00266 | -2.33891584 |
| WDR19   | -0.244444632 | 3.80378067 | -3.194930636 | 0.001574 | 0.00266 | -2.33926749 |
| CHD1L   | -0.234261567 | 4.49905477 | -3.194659811 | 0.001575 | 0.00266 | -2.34009926 |
| RNF166  | -0.177519387 | 3.3482964  | -3.194365769 | 0.001577 | 0.00267 | -2.34100225 |
| ARRB1   | -0.205681074 | 2.68237864 | -3.194300368 | 0.001577 | 0.00267 | -2.34120308 |
| MCC     | -0.301182183 | 2.52487408 | -3.193866151 | 0.001579 | 0.00267 | -2.34253639 |
| NSD3    | -0.219152777 | 3.886429   | -3.19356746  | 0.001581 | 0.00267 | -2.34345345 |
| EMSY    | -0.204409832 | 2.32983525 | -3.193333434 | 0.001582 | 0.00267 | -2.34417191 |
| CNTN1   | 0.201705686  | 0.35169632 | 3.193234553  | 0.001583 | 0.00267 | -2.34447547 |
| TMEM21  | -0.820903359 | 2.54922193 | -3.192930902 | 0.001584 | 0.00268 | -2.34540758 |

|          |              |            |              |          |         |             |
|----------|--------------|------------|--------------|----------|---------|-------------|
| WDR35    | -0.245120076 | 3.31691363 | -3.192158311 | 0.001588 | 0.00268 | -2.34777884 |
| C12orf29 | -0.174030462 | 2.96552547 | -3.191727323 | 0.001591 | 0.00269 | -2.34910141 |
| SOCS1    | -0.403685013 | 4.40328575 | -3.191468181 | 0.001592 | 0.00269 | -2.34989656 |
| IARS     | -0.334758203 | 5.29378743 | -3.191286761 | 0.001593 | 0.00269 | -2.35045319 |
| LEMD3    | -0.23655572  | 4.01737111 | -3.191250286 | 0.001593 | 0.00269 | -2.3505651  |
| PTP4A3   | 0.301190991  | 5.6679525  | 3.190668881  | 0.001596 | 0.0027  | -2.35234874 |
| GFAP     | -0.279107183 | 0.69477131 | -3.190433684 | 0.001598 | 0.0027  | -2.3530702  |
| NEURL2   | -0.181780869 | 1.68204918 | -3.189822077 | 0.001601 | 0.0027  | -2.35494604 |
| COL6A5   | 0.091833448  | 0.07897661 | 3.188593497  | 0.001607 | 0.00271 | -2.35871319 |
| KPNA6    | -0.222979767 | 5.27941089 | -3.188222026 | 0.001609 | 0.00272 | -2.35985196 |
| TNFRSF   | -0.369221466 | 2.02483964 | -3.187191969 | 0.001615 | 0.00273 | -2.36300901 |
| GNL2     | -0.162362992 | 4.70381251 | -3.186701107 | 0.001618 | 0.00273 | -2.36451314 |
| NEGR1    | -0.255097507 | 0.71611375 | -3.18577651  | 0.001623 | 0.00274 | -2.36734576 |
| CREB3L1  | 0.02907285   | 0.04568167 | 3.185588982  | 0.001624 | 0.00274 | -2.36792018 |
| ZNF573   | -0.171906357 | 1.16277522 | -3.18555726  | 0.001624 | 0.00274 | -2.36801734 |
| DHX36    | -0.245532959 | 3.90556799 | -3.185494809 | 0.001624 | 0.00274 | -2.36820863 |
| PDGFA    | 0.225553141  | 3.43531679 | 3.184975495  | 0.001627 | 0.00274 | -2.36979915 |
| KBTBD4   | -0.306524595 | 3.22980136 | -3.183717181 | 0.001634 | 0.00276 | -2.37365204 |
| POLR2J3  | 0.256989675  | 1.38797939 | 3.182969055  | 0.001638 | 0.00276 | -2.3759421  |
| TACC3    | -0.282818527 | 2.50139568 | -3.182661587 | 0.001639 | 0.00276 | -2.37688313 |
| CHP1     | -0.237196956 | 6.65107259 | -3.18058247  | 0.001651 | 0.00278 | -2.38324424 |
| SLAIN1   | -0.185872368 | 3.00420036 | -3.180452841 | 0.001651 | 0.00278 | -2.38364072 |
| ZNF66    | -0.139222456 | 1.04658481 | -3.179323834 | 0.001658 | 0.00279 | -2.38709321 |
| UCN2     | 0.100830593  | 0.12016667 | 3.178249829  | 0.001664 | 0.0028  | -2.39037645 |
| LRRC52   | 0.270604828  | 0.86096247 | 3.177322977  | 0.001669 | 0.00281 | -2.39320902 |
| UBAP1    | -0.214877998 | 5.96348758 | -3.176233272 | 0.001675 | 0.00282 | -2.39653831 |
| ZNF407   | -0.214080002 | 2.30229103 | -3.175606794 | 0.001678 | 0.00283 | -2.39845187 |
| FRMD4A   | -0.207384897 | 1.74930774 | -3.175286598 | 0.00168  | 0.00283 | -2.39942976 |
| STAT2    | 0.234493782  | 5.42001101 | 3.175215551  | 0.00168  | 0.00283 | -2.39964673 |
| ABCC3    | 0.59354161   | 4.29974218 | 3.174436194  | 0.001685 | 0.00284 | -2.40202648 |
| KCNMB4   | -0.31576113  | 2.26778253 | -3.174093259 | 0.001687 | 0.00284 | -2.40307346 |
| FBP1     | -0.36007702  | 6.15067343 | -3.174058172 | 0.001687 | 0.00284 | -2.40318058 |
| NELL1    | -0.037022896 | 0.03622687 | -3.173613012 | 0.001689 | 0.00284 | -2.40453947 |
| CLASRP   | -0.213137291 | 4.41793416 | -3.173544187 | 0.00169  | 0.00285 | -2.40474955 |
| VWA5A    | 0.276604051  | 4.08321588 | 3.173282301  | 0.001691 | 0.00285 | -2.40554889 |
| PSMD5    | -0.248857022 | 4.54871795 | -3.173082724 | 0.001692 | 0.00285 | -2.40615801 |
| CNMD     | -0.781980218 | 1.73798775 | -3.172772067 | 0.001694 | 0.00285 | -2.40710607 |
| NBPF1    | -0.234328011 | 2.12771385 | -3.172327832 | 0.001697 | 0.00286 | -2.40846164 |
| FBXL14   | -0.311851812 | 4.52405155 | -3.171798339 | 0.0017   | 0.00286 | -2.41007714 |
| ZNF80    | 0.080141845  | 0.13934561 | 3.171720949  | 0.0017   | 0.00286 | -2.41031324 |



|          |              |            |              |          |         |             |
|----------|--------------|------------|--------------|----------|---------|-------------|
| KALRN    | -0.243013071 | 1.88208311 | -3.171648173 | 0.0017   | 0.00286 | -2.41053526 |
| CBWD3    | -0.054704613 | 0.23399075 | -3.170961336 | 0.001704 | 0.00287 | -2.41263035 |
| ZCCHC8   | -0.201207959 | 3.52434706 | -3.170031375 | 0.00171  | 0.00288 | -2.4154664  |
| PLA2G4/  | 0.321261449  | 1.90591603 | 3.169101502  | 0.001715 | 0.00288 | -2.41830141 |
| HIST2H2  | -0.171823247 | 0.67707517 | -3.168852139 | 0.001716 | 0.00289 | -2.41906154 |
| TENT5A   | 0.377280791  | 3.95963207 | 3.168294684  | 0.001719 | 0.00289 | -2.42076063 |
| ZNF585A  | -0.191023047 | 2.06480136 | -3.168152579 | 0.00172  | 0.00289 | -2.42119371 |
| TRIQQ    | -0.228358501 | 4.030917   | -3.168144506 | 0.00172  | 0.00289 | -2.42121831 |
| XPR1     | 0.368693035  | 5.22840514 | 3.167805456  | 0.001722 | 0.0029  | -2.42225153 |
| PLCB4    | -0.507900632 | 4.3129948  | -3.167765614 | 0.001722 | 0.0029  | -2.42237294 |
| ULK1     | -0.196083992 | 4.49360169 | -3.166971755 | 0.001727 | 0.0029  | -2.42479172 |
| PGLYRP   | -0.059254119 | 0.10855914 | -3.166361922 | 0.00173  | 0.00291 | -2.42664941 |
| C21orf91 | 0.231343375  | 3.01729035 | 3.166339311  | 0.001731 | 0.00291 | -2.42671828 |
| SUSD4    | 0.417897051  | 2.41117847 | 3.166327931  | 0.001731 | 0.00291 | -2.42675295 |
| LYVE1    | -0.342996711 | 1.61576171 | -3.166324858 | 0.001731 | 0.00291 | -2.42676231 |
| ABCD1    | -0.197378027 | 3.43705208 | -3.166286465 | 0.001731 | 0.00291 | -2.42687925 |
| CNTNAP   | 0.288050356  | 2.02660203 | 3.166081601  | 0.001732 | 0.00291 | -2.42750322 |
| RBM6     | -0.234161867 | 5.00858916 | -3.165696326 | 0.001734 | 0.00291 | -2.4286766  |
| EA2F     | -0.278088143 | 1.96618197 | -3.165329764 | 0.001736 | 0.00292 | -2.42979286 |
| KLRB1    | 0.403857967  | 1.9550479  | 3.1643096    | 0.001742 | 0.00293 | -2.43289884 |
| MFSD8    | -0.205769979 | 3.38878973 | -3.162851005 | 0.001751 | 0.00294 | -2.43733806 |
| SEMA3B   | 0.456288401  | 3.62140227 | 3.162618391  | 0.001752 | 0.00294 | -2.43804585 |
| POLR2D   | -0.184067328 | 4.01550726 | -3.162540641 | 0.001752 | 0.00294 | -2.43828241 |
| NEFL     | -0.32901168  | 0.41256986 | -3.16208201  | 0.001755 | 0.00295 | -2.43967773 |
| CLECL1   | 0.234194576  | 0.74280693 | 3.161657752  | 0.001758 | 0.00295 | -2.44096831 |
| BTBD7    | -0.252044661 | 3.78553946 | -3.161531773 | 0.001758 | 0.00295 | -2.4413515  |
| HRNR     | 0.089674161  | 0.23669142 | 3.161487709  | 0.001759 | 0.00295 | -2.44148553 |
| TPSG1    | -0.100644242 | 0.23968019 | -3.161151745 | 0.00176  | 0.00295 | -2.44250736 |
| NRG3     | -0.131749354 | 0.38233993 | -3.161132555 | 0.001761 | 0.00295 | -2.44256572 |
| RCE1     | -0.196048748 | 3.62742993 | -3.160816133 | 0.001762 | 0.00296 | -2.44352802 |
| SUZ12    | -0.219369038 | 4.30238752 | -3.159395179 | 0.001771 | 0.00297 | -2.44784828 |
| ZNF554   | -0.165016307 | 2.59112649 | -3.159043391 | 0.001773 | 0.00297 | -2.44891758 |
| CCHCR1   | -0.260418219 | 4.15004659 | -3.158562161 | 0.001776 | 0.00298 | -2.45038016 |
| VKORC1   | -0.238817228 | 4.58673061 | -3.15819342  | 0.001778 | 0.00298 | -2.45150071 |
| EMILIN2  | 0.440652799  | 4.33174502 | 3.15809132   | 0.001778 | 0.00298 | -2.45181096 |
| MYL3     | -0.278820685 | 0.56078833 | -3.158061119 | 0.001779 | 0.00298 | -2.45190272 |
| TMEM13   | -0.340282395 | 2.54386488 | -3.157826203 | 0.00178  | 0.00298 | -2.45261651 |
| POLE     | 0.159745769  | 2.08345037 | 3.15619307   | 0.00179  | 0.003   | -2.45757739 |
| KRT6A    | 0.476338893  | 0.80718161 | 3.155953321  | 0.001791 | 0.003   | -2.45830546 |
| ESR2     | -0.066709794 | 0.31662947 | -3.155903288 | 0.001791 | 0.003   | -2.4584574  |

|          |              |            |              |          |         |             |
|----------|--------------|------------|--------------|----------|---------|-------------|
| DUSP8    | 0.35585067   | 3.01491761 | 3.155703505  | 0.001792 | 0.003   | -2.45906405 |
| PASK     | -0.646942309 | 3.26456855 | -3.155083097 | 0.001796 | 0.00301 | -2.46094774 |
| RNF146   | -0.301386826 | 5.79380126 | -3.155019004 | 0.001796 | 0.00301 | -2.46114232 |
| MS4A7    | 0.334377075  | 2.99676048 | 3.154742625  | 0.001798 | 0.00301 | -2.46198134 |
| KYAT3    | -0.222888661 | 5.50141201 | -3.154039837 | 0.001802 | 0.00302 | -2.46411452 |
| PIGM     | -0.208532573 | 3.90138769 | -3.15334421  | 0.001806 | 0.00303 | -2.46622554 |
| RCOR3    | -0.236993519 | 4.47329403 | -3.153074948 | 0.001808 | 0.00303 | -2.46704255 |
| ZNF526   | -0.171737558 | 3.21252457 | -3.152594091 | 0.001811 | 0.00303 | -2.46850144 |
| ZNF713   | -0.184713501 | 1.43379945 | -3.151690989 | 0.001816 | 0.00304 | -2.47124083 |
| DNM2     | -0.173463757 | 4.89195856 | -3.151637036 | 0.001817 | 0.00304 | -2.47140446 |
| IFT81    | -0.232854267 | 3.36976802 | -3.151364668 | 0.001818 | 0.00304 | -2.47223048 |
| FBXL13   | -0.13534135  | 0.88439635 | -3.151044974 | 0.00182  | 0.00305 | -2.47319995 |
| TRIP11   | -0.276732527 | 4.08701129 | -3.150690688 | 0.001822 | 0.00305 | -2.47427421 |
| AJAP1    | 0.304370771  | 0.96688568 | 3.149519986  | 0.001829 | 0.00306 | -2.47782319 |
| PNPLA1   | -0.056122409 | 0.10494951 | -3.149300073 | 0.001831 | 0.00306 | -2.47848972 |
| ICE1     | -0.248666706 | 3.83458732 | -3.148665168 | 0.001834 | 0.00307 | -2.4804138  |
| ZNF619   | -0.208633335 | 2.20906052 | -3.148543974 | 0.001835 | 0.00307 | -2.48078104 |
| DUSP11   | -0.18704338  | 4.20965904 | -3.148516263 | 0.001835 | 0.00307 | -2.480865   |
| CCSER2   | -0.213734774 | 4.40920839 | -3.14831647  | 0.001837 | 0.00307 | -2.48147038 |
| LIMD2    | 0.409093124  | 2.70688794 | 3.14810787   | 0.001838 | 0.00307 | -2.4821024  |
| C15orf39 | -0.231171282 | 4.73870416 | -3.147995572 | 0.001839 | 0.00308 | -2.48244262 |
| F5       | 0.600097962  | 1.50881707 | 3.147906349  | 0.001839 | 0.00308 | -2.48271293 |
| KCNMB2   | -0.116867034 | 0.17751974 | -3.147435207 | 0.001842 | 0.00308 | -2.48414018 |
| JPH4     | 0.089422178  | 0.38627721 | 3.147314196  | 0.001843 | 0.00308 | -2.48450673 |
| FAS      | 0.371547304  | 4.47266681 | 3.146979147  | 0.001845 | 0.00308 | -2.48552155 |
| DNM1     | 0.234244181  | 1.00890036 | 3.146263979  | 0.001849 | 0.00309 | -2.48768736 |
| FAM160/  | -0.218026065 | 4.79891685 | -3.146092133 | 0.00185  | 0.00309 | -2.48820771 |
| RASGEF   | 0.359146332  | 1.45025519 | 3.145540958  | 0.001853 | 0.0031  | -2.48987649 |
| FAM156/  | -0.032647106 | 0.12043495 | -3.145398267 | 0.001854 | 0.0031  | -2.49030847 |
| ERICH3   | 0.161707849  | 0.18538213 | 3.145215735  | 0.001855 | 0.0031  | -2.49086104 |
| MLLT11   | -0.303687801 | 2.8169776  | -3.144895701 | 0.001857 | 0.0031  | -2.49182978 |
| ZNF774   | -0.175772563 | 1.69396766 | -3.144503065 | 0.00186  | 0.00311 | -2.49301817 |
| OPTN     | 0.225444104  | 5.17985303 | 3.144236995  | 0.001861 | 0.00311 | -2.4938234  |
| ARHGEF   | -0.260783207 | 5.12450512 | -3.143697572 | 0.001865 | 0.00312 | -2.49545571 |
| PILRA    | 0.304232175  | 2.8190584  | 3.143506155  | 0.001866 | 0.00312 | -2.49603488 |
| MSANTD   | -0.262260747 | 3.62307847 | -3.143042866 | 0.001869 | 0.00312 | -2.49743653 |
| TWISTN1  | -0.185583057 | 3.90952083 | -3.14296972  | 0.001869 | 0.00312 | -2.49765781 |
| DPH1     | -0.229517917 | 3.57105529 | -3.142738893 | 0.001871 | 0.00312 | -2.49835607 |
| ZNF175   | -0.220382228 | 2.68165831 | -3.142008706 | 0.001875 | 0.00313 | -2.50056461 |
| TMEM23   | -0.233719019 | 4.09922021 | -3.141933661 | 0.001876 | 0.00313 | -2.50079156 |

|          |              |            |              |          |         |             |
|----------|--------------|------------|--------------|----------|---------|-------------|
| ALDH3B:  | 0.182576729  | 0.380062   | 3.141419593  | 0.001879 | 0.00314 | -2.5023461  |
| WIZ      | -0.177427772 | 4.09691489 | -3.139915734 | 0.001888 | 0.00315 | -2.50689241 |
| ALKAL2   | 0.428843702  | 1.54157069 | 3.138895522  | 0.001894 | 0.00316 | -2.50997546 |
| ACMSD    | -0.09871741  | 0.31669329 | -3.138437587 | 0.001897 | 0.00317 | -2.51135902 |
| CWF19L   | -0.214827753 | 3.95496068 | -3.138339135 | 0.001898 | 0.00317 | -2.51165645 |
| SYTL1    | 0.400015292  | 4.92951158 | 3.138220735  | 0.001899 | 0.00317 | -2.51201414 |
| ILF3     | -0.205542315 | 6.14223375 | -3.137777749 | 0.001901 | 0.00317 | -2.51335227 |
| ATAT1    | -0.240587197 | 3.0638237  | -3.135480369 | 0.001916 | 0.0032  | -2.5202892  |
| NEK3     | -0.181723896 | 2.50840992 | -3.134518131 | 0.001922 | 0.00321 | -2.52319328 |
| CLIC4    | -0.303897993 | 5.80346941 | -3.134076403 | 0.001925 | 0.00321 | -2.52452616 |
| HAUS3    | -0.166382513 | 2.59419853 | -3.133625163 | 0.001927 | 0.00321 | -2.52588756 |
| PRDM10   | -0.2093119   | 2.42710403 | -3.133150372 | 0.00193  | 0.00322 | -2.52731982 |
| CPEB4    | -0.312416063 | 4.07549295 | -3.132958152 | 0.001932 | 0.00322 | -2.52789961 |
| HNMT     | 0.34792884   | 2.78636248 | 3.132856927  | 0.001932 | 0.00322 | -2.52820493 |
| GOLGA6   | -0.076620271 | 0.09942979 | -3.131903246 | 0.001938 | 0.00323 | -2.53108095 |
| DUSP7    | -0.225205611 | 3.47872376 | -3.131544587 | 0.001941 | 0.00323 | -2.53216235 |
| BBC3     | 0.285205024  | 3.84990439 | 3.130903251  | 0.001945 | 0.00324 | -2.53409577 |
| AGO3     | -0.192696615 | 2.21340125 | -3.130872932 | 0.001945 | 0.00324 | -2.53418717 |
| CAST     | 0.26633138   | 5.98718809 | 3.130629009  | 0.001946 | 0.00324 | -2.53492242 |
| IL1RAPL  | 0.092790548  | 0.12496905 | 3.13002185   | 0.00195  | 0.00325 | -2.53675232 |
| HOXD9    | 0.394114025  | 1.58298174 | 3.129318668  | 0.001955 | 0.00326 | -2.53887121 |
| UBD      | 0.594000562  | 1.38225572 | 3.127639054  | 0.001966 | 0.00327 | -2.5439306  |
| EIF3D    | -0.225677841 | 7.2796784  | -3.127600503 | 0.001966 | 0.00327 | -2.54404669 |
| SYNGR4   | -0.12367038  | 0.36405932 | -3.127307162 | 0.001968 | 0.00328 | -2.54493004 |
| MPZL1    | -0.248742062 | 4.65411474 | -3.127170851 | 0.001969 | 0.00328 | -2.54534049 |
| INMT-MII | 0.100779683  | 0.12047932 | 3.126832961  | 0.001971 | 0.00328 | -2.54635785 |
| FHL3     | 0.294729732  | 4.19005493 | 3.126672706  | 0.001972 | 0.00328 | -2.54684032 |
| NUTM2A   | -0.072133529 | 0.30206973 | -3.126487501 | 0.001973 | 0.00329 | -2.54739789 |
| APOB     | 0.040110865  | 0.04473493 | 3.126443745  | 0.001973 | 0.00329 | -2.54752961 |
| NOP53    | -0.239370085 | 7.75360093 | -3.126402348 | 0.001974 | 0.00329 | -2.54765423 |
| RPTOR    | -0.180689156 | 3.65557566 | -3.123996895 | 0.001989 | 0.00331 | -2.55489298 |
| CORO2A   | 0.399228061  | 3.46537678 | 3.123821392  | 0.00199  | 0.00331 | -2.55542092 |
| ZNF804A  | -0.153979991 | 0.31919527 | -3.123225439 | 0.001994 | 0.00332 | -2.55721344 |
| POLR3A   | -0.174653011 | 3.17133638 | -3.123103651 | 0.001995 | 0.00332 | -2.55757971 |
| COPG2    | -0.234236701 | 5.28670833 | -3.122613779 | 0.001998 | 0.00332 | -2.55905287 |
| C18orf25 | -0.214165893 | 3.60299888 | -3.122388239 | 0.002    | 0.00333 | -2.55973104 |
| JMJD7    | -0.079057604 | 0.30077495 | -3.122270838 | 0.002    | 0.00333 | -2.56008404 |
| ZNF831   | 0.175059723  | 0.35631383 | 3.122184145  | 0.002001 | 0.00333 | -2.56034469 |
| RBCK1    | -0.164155318 | 5.99572265 | -3.121907445 | 0.002003 | 0.00333 | -2.56117659 |
| USP53    | 0.230368715  | 2.42606638 | 3.12179388   | 0.002004 | 0.00333 | -2.561518   |

|         |              |            |              |          |         |             |
|---------|--------------|------------|--------------|----------|---------|-------------|
| USP38   | -0.224971805 | 3.88869949 | -3.121685551 | 0.002004 | 0.00333 | -2.56184366 |
| PLA2G2I | 0.467334523  | 0.95885814 | 3.12133967   | 0.002007 | 0.00334 | -2.56288339 |
| FYN     | 0.290302484  | 5.84067612 | 3.120579439  | 0.002012 | 0.00334 | -2.56516828 |
| B3GNT7  | 0.508864772  | 3.7196768  | 3.12056831   | 0.002012 | 0.00334 | -2.56520173 |
| ZNF829  | -0.153921309 | 1.54951696 | -3.12034325  | 0.002013 | 0.00335 | -2.56587805 |
| HDAC6   | -0.190273182 | 4.08442415 | -3.120209185 | 0.002014 | 0.00335 | -2.5662809  |
| RNF44   | -0.217171823 | 4.89026302 | -3.120035997 | 0.002015 | 0.00335 | -2.56680129 |
| ALS2    | -0.197269028 | 2.80593755 | -3.11928576  | 0.00202  | 0.00336 | -2.56905528 |
| RPL32   | -0.211392226 | 9.1342726  | -3.118925432 | 0.002022 | 0.00336 | -2.57013766 |
| NID2    | -0.508686882 | 5.12573991 | -3.118453481 | 0.002026 | 0.00337 | -2.57155516 |
| TBC1D3  | -0.192548468 | 1.65353854 | -3.118244936 | 0.002027 | 0.00337 | -2.57218147 |
| CTPS1   | -0.227049696 | 3.01104148 | -3.118179343 | 0.002027 | 0.00337 | -2.57237845 |
| LRPPRC  | -0.232709219 | 5.01254864 | -3.117424243 | 0.002032 | 0.00338 | -2.57464579 |
| TRPV4   | -0.229736713 | 1.54554496 | -3.117379896 | 0.002033 | 0.00338 | -2.57477894 |
| ADD1    | -0.216666931 | 5.83216718 | -3.117230829 | 0.002034 | 0.00338 | -2.57522647 |
| RPL18   | -0.231735513 | 9.0596062  | -3.116905558 | 0.002036 | 0.00338 | -2.57620296 |
| PARP15  | 0.293227173  | 0.94829459 | 3.116534029  | 0.002038 | 0.00338 | -2.57731819 |
| VOPP1   | -0.199830961 | 4.07541974 | -3.115981388 | 0.002042 | 0.00339 | -2.57897685 |
| STK26   | 0.314409882  | 2.87214557 | 3.114541324  | 0.002052 | 0.00341 | -2.58329767 |
| BTG2    | -0.384477327 | 8.03794946 | -3.113721193 | 0.002057 | 0.00341 | -2.5857576  |
| SLC6A15 | -0.035008458 | 0.03191414 | -3.113386794 | 0.002059 | 0.00342 | -2.58676043 |
| ZNF260  | -0.216953413 | 3.70949261 | -3.113257512 | 0.00206  | 0.00342 | -2.58714811 |
| C1QTNF5 | -0.238457971 | 1.23951713 | -3.113099339 | 0.002061 | 0.00342 | -2.58762241 |
| DNAJC11 | -0.215472696 | 2.90048391 | -3.11265392  | 0.002064 | 0.00342 | -2.58895791 |
| FGFBP1  | 0.735305678  | 2.16440685 | 3.112604365  | 0.002065 | 0.00343 | -2.58910648 |
| LMAN1   | -0.29170707  | 6.46756234 | -3.112551169 | 0.002065 | 0.00343 | -2.58926597 |
| OR2A42  | -0.057027652 | 0.11009926 | -3.112224895 | 0.002067 | 0.00343 | -2.5902441  |
| SMC1B   | -0.068748112 | 0.27771223 | -3.111992168 | 0.002069 | 0.00343 | -2.59094173 |
| ALG1L   | -0.375731345 | 2.23100578 | -3.111401314 | 0.002073 | 0.00344 | -2.59271267 |
| UGDH    | -0.282815222 | 4.76473873 | -3.11082697  | 0.002077 | 0.00344 | -2.59443383 |
| TMEM26  | -0.237020933 | 0.70636227 | -3.11063807  | 0.002078 | 0.00345 | -2.59499985 |
| PLAC1   | -0.081936241 | 0.11831974 | -3.110185542 | 0.002081 | 0.00345 | -2.59635567 |
| ZNF816  | -0.198492148 | 2.75583266 | -3.109748965 | 0.002084 | 0.00345 | -2.59766353 |
| ASIC3   | -0.197912168 | 0.83340151 | -3.109459707 | 0.002086 | 0.00346 | -2.59852997 |
| ZNF566  | -0.18748964  | 2.35940003 | -3.10912179  | 0.002088 | 0.00346 | -2.59954207 |
| FPGT-TN | -0.100676897 | 0.34219321 | -3.107929949 | 0.002096 | 0.00347 | -2.60311095 |
| CYP4F22 | 0.077009772  | 0.20696697 | 3.107694044  | 0.002098 | 0.00348 | -2.6038172  |
| CACNA1  | -0.136001186 | 0.26414152 | -3.107397477 | 0.0021   | 0.00348 | -2.60470499 |
| TLR10   | 0.259933339  | 0.68484527 | 3.106230944  | 0.002108 | 0.00349 | -2.6081963  |
| SLC43A2 | -0.22025335  | 3.70181228 | -3.106130969 | 0.002109 | 0.00349 | -2.60849546 |

|         |              |            |              |          |         |             |
|---------|--------------|------------|--------------|----------|---------|-------------|
| ZNF451  | -0.176781758 | 2.95014681 | -3.105248957 | 0.002115 | 0.0035  | -2.61113435 |
| FYB2    | -0.275688727 | 0.62477463 | -3.104643359 | 0.002119 | 0.00351 | -2.61294583 |
| KCNK10  | -0.089601571 | 0.14278808 | -3.103783611 | 0.002125 | 0.00352 | -2.61551697 |
| MMP14   | 0.388829512  | 6.38321803 | 3.103663597  | 0.002126 | 0.00352 | -2.61587583 |
| TRIM73  | -0.089545547 | 0.27495026 | -3.103629184 | 0.002126 | 0.00352 | -2.61597873 |
| SYNC    | -0.291393909 | 1.98769076 | -3.103620699 | 0.002126 | 0.00352 | -2.6160041  |
| PIEZO1  | -0.223495676 | 4.55225554 | -3.10330091  | 0.002128 | 0.00352 | -2.61696024 |
| PGAM4   | -0.057105467 | 0.19471641 | -3.103155357 | 0.002129 | 0.00352 | -2.61739539 |
| SLK     | -0.250127088 | 4.97313091 | -3.102672478 | 0.002133 | 0.00353 | -2.61883892 |
| UBR1    | -0.261063293 | 3.46229971 | -3.101961682 | 0.002138 | 0.00354 | -2.6209634  |
| RABL2B  | -0.218927386 | 3.30605979 | -3.101916783 | 0.002138 | 0.00354 | -2.62109759 |
| GPR37   | 0.246694607  | 0.55718363 | 3.101843456  | 0.002138 | 0.00354 | -2.62131672 |
| MAP3K1  | -0.058481843 | 0.17386902 | -3.101181173 | 0.002143 | 0.00355 | -2.62329573 |
| ZNF732  | 0.113132366  | 0.66670325 | 3.101022483  | 0.002144 | 0.00355 | -2.62376987 |
| N4BP2   | -0.266167052 | 2.43954403 | -3.100575641 | 0.002147 | 0.00355 | -2.62510482 |
| NT5C1B  | -0.050564111 | 0.2013297  | -3.100004318 | 0.002151 | 0.00356 | -2.6268114  |
| NELL2   | 0.874235091  | 5.05178713 | 3.096773321  | 0.002174 | 0.0036  | -2.63645713 |
| GRIK3   | 0.278240579  | 0.72731076 | 3.095779912  | 0.002181 | 0.00361 | -2.63942095 |
| QPCT    | 0.676153268  | 5.62557548 | 3.095762957  | 0.002181 | 0.00361 | -2.63947152 |
| MOXD1   | 0.411796336  | 1.68609352 | 3.095296761  | 0.002184 | 0.00361 | -2.6408621  |
| NCF1    | 0.305879016  | 1.16417628 | 3.094812306  | 0.002188 | 0.00362 | -2.64230694 |
| TTC16   | -0.077659615 | 0.27097212 | -3.093668132 | 0.002196 | 0.00363 | -2.64571848 |
| KLC2    | -0.177909434 | 3.97974499 | -3.093526153 | 0.002197 | 0.00363 | -2.64614173 |
| FAM131E | 0.098577972  | 0.39666643 | 3.092530128  | 0.002204 | 0.00364 | -2.64911046 |
| ZNF347  | -0.189963598 | 2.46602701 | -3.092459399 | 0.002205 | 0.00364 | -2.64932124 |
| POU5F1  | -0.141895817 | 0.69223781 | -3.091973756 | 0.002208 | 0.00365 | -2.65076839 |
| NBPF12  | -0.22873248  | 2.29467066 | -3.089914817 | 0.002223 | 0.00367 | -2.65690138 |
| ZNF234  | -0.188276798 | 2.38061096 | -3.089907829 | 0.002223 | 0.00367 | -2.65692219 |
| IFI16   | 0.343846199  | 4.82265315 | 3.089706037  | 0.002224 | 0.00367 | -2.65752307 |
| CHST11  | -0.335517536 | 3.63243539 | -3.089481325 | 0.002226 | 0.00368 | -2.65819215 |
| POU6F1  | -0.174476811 | 2.96842008 | -3.089424464 | 0.002226 | 0.00368 | -2.65836145 |
| DIAPH3  | 0.113221634  | 0.46464814 | 3.08930496   | 0.002227 | 0.00368 | -2.65871725 |
| OSGIN2  | 0.253163257  | 4.4226877  | 3.088776316  | 0.002231 | 0.00368 | -2.66029103 |
| ESYT2   | -0.262258148 | 5.69617502 | -3.088168425 | 0.002235 | 0.00369 | -2.66210042 |
| SLC35F1 | -0.307162842 | 0.8631832  | -3.08811106  | 0.002236 | 0.00369 | -2.66227115 |
| ZNF229  | -0.249462118 | 2.81540286 | -3.087771392 | 0.002238 | 0.00369 | -2.66328201 |
| GNG2    | -0.250836274 | 2.38581493 | -3.087537253 | 0.00224  | 0.0037  | -2.66397876 |
| TBC1D9  | 0.317379936  | 3.96344654 | 3.086348303  | 0.002249 | 0.00371 | -2.66751605 |
| SPTLC2  | -0.234439544 | 4.58802192 | -3.085272576 | 0.002257 | 0.00372 | -2.67071539 |
| OIT3    | -0.374255534 | 1.7380868  | -3.085271612 | 0.002257 | 0.00372 | -2.67071826 |

|          |              |            |              |          |         |             |
|----------|--------------|------------|--------------|----------|---------|-------------|
| ADH1C    | -0.121243167 | 0.27200649 | -3.084482802 | 0.002262 | 0.00373 | -2.67306362 |
| ACD      | -0.203361548 | 4.07959417 | -3.084338711 | 0.002263 | 0.00373 | -2.67349199 |
| FLRT3    | 0.563402371  | 3.91284242 | 3.083720878  | 0.002268 | 0.00374 | -2.67532852 |
| SCAF8    | -0.247398932 | 4.59274581 | -3.083337935 | 0.002271 | 0.00375 | -2.67646666 |
| SLC38A4  | 0.21324845   | 0.46997197 | 3.083229369  | 0.002272 | 0.00375 | -2.6767893  |
| TLNRD1   | -0.195530567 | 3.59764095 | -3.082949979 | 0.002274 | 0.00375 | -2.67761956 |
| PDE9A    | 0.313957867  | 4.08936207 | 3.081941511  | 0.002281 | 0.00376 | -2.68061584 |
| ITLN2    | -0.079626725 | 0.10357815 | -3.081435939 | 0.002285 | 0.00377 | -2.68211761 |
| UBN2     | -0.212016908 | 2.68410419 | -3.081221096 | 0.002286 | 0.00377 | -2.68275572 |
| RALBP1   | -0.257140137 | 5.35926415 | -3.081068467 | 0.002287 | 0.00377 | -2.68320902 |
| TTL      | 0.185871938  | 2.71627533 | 3.080914097  | 0.002289 | 0.00377 | -2.68366747 |
| SCRT1    | -0.032563718 | 0.07911438 | -3.080749745 | 0.00229  | 0.00377 | -2.68415554 |
| FCMR     | 0.399113734  | 2.4963365  | 3.080027784  | 0.002295 | 0.00378 | -2.68629924 |
| KIAA0101 | -0.236613779 | 5.65799391 | -3.079981752 | 0.002296 | 0.00378 | -2.6864359  |
| PRX      | -0.276911376 | 3.4518094  | -3.07971217  | 0.002298 | 0.00379 | -2.68723624 |
| HIST1H2  | -0.119256128 | 0.2179536  | -3.079663326 | 0.002298 | 0.00379 | -2.68738124 |
| KPNA3    | -0.237297907 | 4.83636336 | -3.077844679 | 0.002311 | 0.00381 | -2.69277864 |
| CHMP4C   | -0.264406979 | 5.29743849 | -3.077551997 | 0.002314 | 0.00381 | -2.69364699 |
| FGF9     | 0.170622024  | 0.43091481 | 3.077198642  | 0.002316 | 0.00382 | -2.69469525 |
| DEFB124  | -0.104516066 | 0.21983873 | -3.076115333 | 0.002324 | 0.00383 | -2.69790827 |
| ADRA2A   | 0.434766035  | 1.7460859  | 3.075486962  | 0.002329 | 0.00384 | -2.6997715  |
| ARID5B   | 0.390799223  | 3.13789399 | 3.07544584   | 0.002329 | 0.00384 | -2.69989342 |
| SLC25A2  | -0.125519053 | 0.85155415 | -3.075393736 | 0.00233  | 0.00384 | -2.7000479  |
| LINC0061 | -0.086698038 | 0.18779542 | -3.075188603 | 0.002331 | 0.00384 | -2.70065606 |
| UBE4B    | -0.214637938 | 4.57548305 | -3.0750692   | 0.002332 | 0.00384 | -2.70101004 |
| SLC30A1  | -0.311398182 | 4.94250824 | -3.07473731  | 0.002335 | 0.00384 | -2.70199388 |
| TXNIP    | -0.355381178 | 8.97678207 | -3.074471496 | 0.002337 | 0.00385 | -2.70278178 |
| FBXW8    | -0.268615708 | 3.69703168 | -3.074203584 | 0.002339 | 0.00385 | -2.70357584 |
| INHBE    | -0.217011497 | 0.29142927 | -3.074032351 | 0.00234  | 0.00385 | -2.70408331 |
| RAPGEF   | -0.23587041  | 5.18354563 | -3.072690209 | 0.00235  | 0.00387 | -2.70806006 |
| SPRN     | -0.217387696 | 2.27026239 | -3.072673982 | 0.00235  | 0.00387 | -2.70810813 |
| RNF2     | -0.192451389 | 3.98569295 | -3.071911142 | 0.002356 | 0.00388 | -2.71036768 |
| TIMM23E  | -0.217822852 | 2.57208401 | -3.071683613 | 0.002358 | 0.00388 | -2.71104153 |
| GBP7     | -0.049796651 | 0.1488296  | -3.071622297 | 0.002358 | 0.00388 | -2.71122312 |
| ENTHD1   | 0.05672792   | 0.08022872 | 3.071611026  | 0.002359 | 0.00388 | -2.71125649 |
| FCGR1A   | 0.318615206  | 1.48420865 | 3.071290654  | 0.002361 | 0.00388 | -2.7122052  |
| MON2     | -0.229083901 | 3.3306734  | -3.070846486 | 0.002364 | 0.00389 | -2.71352035 |
| CYP3A5   | -0.059182074 | 0.34564227 | -3.070713544 | 0.002365 | 0.00389 | -2.71391395 |
| UBR4     | -0.280001595 | 4.21417885 | -3.070635765 | 0.002366 | 0.00389 | -2.71414422 |
| SMPDL3   | -0.269660732 | 5.5978605  | -3.06951816  | 0.002375 | 0.0039  | -2.71745239 |

|         |              |            |              |          |         |             |
|---------|--------------|------------|--------------|----------|---------|-------------|
| WASHC   | -0.265354249 | 4.84877954 | -3.06948683  | 0.002375 | 0.0039  | -2.71754511 |
| RNF133  | -0.055894165 | 0.15742941 | -3.069266012 | 0.002376 | 0.00391 | -2.7181986  |
| SRRM5   | -0.111146811 | 0.78490052 | -3.069179891 | 0.002377 | 0.00391 | -2.71845346 |
| GABBR2  | 0.60324804   | 4.24659086 | 3.069135497  | 0.002377 | 0.00391 | -2.71858483 |
| OAS3    | 0.369046436  | 3.27040294 | 3.069072401  | 0.002378 | 0.00391 | -2.71877154 |
| VWA3A   | -0.162148947 | 0.21692577 | -3.06900201  | 0.002378 | 0.00391 | -2.71897984 |
| SMN2    | -0.300292166 | 1.86508652 | -3.068961296 | 0.002379 | 0.00391 | -2.71910031 |
| IFIT3   | 0.379267234  | 4.774552   | 3.068786241  | 0.00238  | 0.00391 | -2.71961829 |
| LRFN5   | -0.139588022 | 0.21841367 | -3.067994814 | 0.002386 | 0.00392 | -2.72195976 |
| CTSA    | 0.190953105  | 6.09315834 | 3.067894025  | 0.002387 | 0.00392 | -2.7222579  |
| NAA50   | -0.231121854 | 5.36423257 | -3.067609909 | 0.002389 | 0.00392 | -2.72309831 |
| OXSR1   | -0.220176648 | 4.56741878 | -3.067093628 | 0.002393 | 0.00393 | -2.72462526 |
| WASF1   | 0.320585789  | 2.44985829 | 3.066319516  | 0.002399 | 0.00394 | -2.72691433 |
| CDKL5   | -0.211429903 | 1.9639218  | -3.063758653 | 0.002419 | 0.00397 | -2.73448305 |
| ANKRD4  | -0.204287575 | 0.59059004 | -3.062964993 | 0.002425 | 0.00398 | -2.73682755 |
| HTRA4   | 0.230637067  | 0.70528352 | 3.062513978  | 0.002429 | 0.00399 | -2.73815961 |
| ZNF286A | -0.149492162 | 1.55608058 | -3.062128297 | 0.002432 | 0.00399 | -2.73929856 |
| RTN4RL  | -0.503555827 | 4.45790374 | -3.061962648 | 0.002433 | 0.00399 | -2.7397877  |
| AIM2    | 0.329688497  | 0.7696886  | 3.061934595  | 0.002433 | 0.00399 | -2.73987053 |
| PABPC1  | 0.231159926  | 8.73631401 | 3.06182945   | 0.002434 | 0.00399 | -2.74018099 |
| CLPSL2  | -0.291467246 | 0.8655276  | -3.061787159 | 0.002434 | 0.00399 | -2.74030586 |
| EPS15   | -0.190974435 | 5.09780012 | -3.061642825 | 0.002436 | 0.00399 | -2.74073202 |
| MTCL1   | -0.094293337 | 0.32929205 | -3.061106695 | 0.00244  | 0.004   | -2.74231481 |
| PMCH    | 0.150354285  | 0.23011374 | 3.060214417  | 0.002447 | 0.00401 | -2.74494846 |
| MAN2C1  | -0.246017117 | 4.712448   | -3.059866367 | 0.00245  | 0.00402 | -2.74597558 |
| RBP5    | -0.356856434 | 2.6328376  | -3.059693135 | 0.002451 | 0.00402 | -2.74648676 |
| BCORL1  | -0.23932072  | 3.40520071 | -3.059539678 | 0.002452 | 0.00402 | -2.74693956 |
| PHRF1   | -0.195326141 | 4.69845536 | -3.05879645  | 0.002458 | 0.00403 | -2.74913228 |
| SBNO2   | 0.210280618  | 4.70765889 | 3.058731063  | 0.002459 | 0.00403 | -2.74932517 |
| PHLDA3  | 0.29682567   | 6.09186065 | 3.058068031  | 0.002464 | 0.00404 | -2.75128084 |
| SLC28A2 | -0.072001445 | 0.23792344 | -3.057867854 | 0.002465 | 0.00404 | -2.7518712  |
| HIPK1   | -0.311337182 | 4.92887516 | -3.056407001 | 0.002477 | 0.00406 | -2.75617846 |
| SOWAHI  | 0.215375768  | 0.8943291  | 3.056396002  | 0.002477 | 0.00406 | -2.75621088 |
| MTF1    | -0.221433001 | 2.87759928 | -3.056005616 | 0.00248  | 0.00406 | -2.75736159 |
| COL21A1 | -0.302990998 | 1.48275303 | -3.055777508 | 0.002482 | 0.00407 | -2.7580339  |
| TMEM74  | -0.087034979 | 0.11459747 | -3.055527639 | 0.002484 | 0.00407 | -2.75877029 |
| TM9SF4  | -0.209235728 | 5.69257272 | -3.054974749 | 0.002488 | 0.00408 | -2.76039953 |
| EIF5A2  | -0.1687174   | 1.46405871 | -3.05483416  | 0.00249  | 0.00408 | -2.76081377 |
| AMIGO2  | 0.512388519  | 4.2000448  | 3.054680486  | 0.002491 | 0.00408 | -2.76126654 |
| MAVS    | -0.189381627 | 4.96427685 | -3.052823631 | 0.002506 | 0.0041  | -2.76673576 |

|         |              |            |              |          |         |             |
|---------|--------------|------------|--------------|----------|---------|-------------|
| NCOA6   | -0.214532171 | 4.25589079 | -3.052638073 | 0.002507 | 0.0041  | -2.76728213 |
| IL12A   | -0.149845861 | 0.37664969 | -3.052239803 | 0.00251  | 0.00411 | -2.76845473 |
| NXF5    | -0.034447113 | 0.07728724 | -3.051667061 | 0.002515 | 0.00412 | -2.77014077 |
| RANBP1  | -0.238614687 | 1.08816602 | -3.051308472 | 0.002518 | 0.00412 | -2.77119624 |
| RHBG    | -0.04648581  | 0.08200493 | -3.051034626 | 0.00252  | 0.00412 | -2.7720022  |
| RTL6    | -0.315227364 | 4.23750022 | -3.050959323 | 0.002521 | 0.00412 | -2.77222381 |
| APLNR   | -0.407710042 | 4.882803   | -3.050586595 | 0.002524 | 0.00413 | -2.77332066 |
| TMEM15  | -0.230122082 | 5.29498258 | -3.050420364 | 0.002525 | 0.00413 | -2.77380979 |
| GEN1    | -0.142430216 | 1.33321245 | -3.050085047 | 0.002528 | 0.00414 | -2.77479639 |
| IFT80   | -0.204986264 | 3.25718163 | -3.049792616 | 0.00253  | 0.00414 | -2.77565672 |
| ZNF208  | -0.256248312 | 1.60740241 | -3.048376883 | 0.002542 | 0.00416 | -2.77982072 |
| OXT     | -0.191736286 | 0.63031473 | -3.047778749 | 0.002547 | 0.00416 | -2.78157944 |
| ADPRHL  | -0.195156477 | 0.70916402 | -3.047576817 | 0.002548 | 0.00417 | -2.78217311 |
| RRP1    | -0.18172997  | 4.27845376 | -3.047196168 | 0.002551 | 0.00417 | -2.78329211 |
| MFSD4B  | -0.162002937 | 1.75244234 | -3.046904334 | 0.002554 | 0.00418 | -2.78414992 |
| KISS1R  | 0.236489671  | 0.8630327  | 3.046861221  | 0.002554 | 0.00418 | -2.78427664 |
| SLC25A3 | -0.19053155  | 3.7956366  | -3.046358746 | 0.002558 | 0.00418 | -2.78575343 |
| TMPRSS  | 0.412432699  | 2.50983109 | 3.046179507  | 0.00256  | 0.00418 | -2.78628016 |
| OASL    | 0.350422735  | 2.02522627 | 3.045168071  | 0.002568 | 0.0042  | -2.78925193 |
| HSF4    | -0.376157326 | 2.75085779 | -3.044861578 | 0.002571 | 0.0042  | -2.79015228 |
| POU4F3  | -0.047888369 | 0.14381946 | -3.044637727 | 0.002572 | 0.0042  | -2.79080981 |
| FZR1    | -0.171320065 | 4.80366006 | -3.043601976 | 0.002581 | 0.00422 | -2.79385158 |
| TNNC1   | -0.477344496 | 3.81275912 | -3.042989673 | 0.002586 | 0.00422 | -2.79564933 |
| GIGYF2  | -0.234008498 | 4.25111051 | -3.041956441 | 0.002595 | 0.00424 | -2.79868218 |
| ZNF493  | -0.238587552 | 2.53146617 | -3.041884255 | 0.002595 | 0.00424 | -2.79889403 |
| AZGP1   | 0.150145459  | 0.20051567 | 3.041227316  | 0.002601 | 0.00425 | -2.8008218  |
| KRTCAP  | -0.200225334 | 4.27734405 | -3.041117813 | 0.002602 | 0.00425 | -2.8011431  |
| ZNF610  | -0.196637094 | 2.70321116 | -3.040672007 | 0.002605 | 0.00425 | -2.80245105 |
| CCDC88  | -0.233454247 | 2.32045509 | -3.039536329 | 0.002615 | 0.00427 | -2.80578219 |
| HAUS2   | -0.221506741 | 3.67348518 | -3.038888411 | 0.00262  | 0.00428 | -2.80768213 |
| DCN     | 0.69498334   | 3.42711582 | 3.038570847  | 0.002623 | 0.00428 | -2.80861321 |
| CASP5   | 0.082364675  | 0.19749511 | 3.03853277   | 0.002623 | 0.00428 | -2.80872485 |
| AMMECF  | -0.202244852 | 3.9697511  | -3.037463721 | 0.002632 | 0.0043  | -2.81185854 |
| ZACN    | -0.088966508 | 0.40205462 | -3.037379722 | 0.002633 | 0.0043  | -2.81210472 |
| GRN     | -0.228106947 | 8.3131437  | -3.036984545 | 0.002636 | 0.0043  | -2.81326281 |
| SLC12A8 | -0.324110744 | 5.22037757 | -3.035939696 | 0.002645 | 0.00432 | -2.81632412 |
| TNFSF12 | -0.186399465 | 5.60117631 | -3.035647586 | 0.002648 | 0.00432 | -2.8171798  |
| RFC5    | -0.213681301 | 4.0643839  | -3.035146077 | 0.002652 | 0.00433 | -2.81864869 |
| SOX11   | 0.236245286  | 0.43270909 | 3.033505353  | 0.002666 | 0.00435 | -2.82345272 |
| NPM1    | -0.20389417  | 8.60786688 | -3.033479025 | 0.002666 | 0.00435 | -2.82352979 |



|          |              |            |              |          |         |             |
|----------|--------------|------------|--------------|----------|---------|-------------|
| MAP9     | -0.261519332 | 3.0772713  | -3.032872207 | 0.002671 | 0.00436 | -2.82530592 |
| ECRG4    | -0.634496974 | 6.91439416 | -3.03211714  | 0.002678 | 0.00437 | -2.82751551 |
| FOXD4    | -0.120927716 | 0.44095138 | -3.030197355 | 0.002694 | 0.00439 | -2.83313116 |
| REN      | 0.435105546  | 1.7360679  | 3.030132551  | 0.002695 | 0.00439 | -2.83332066 |
| STN1     | -0.158063719 | 5.57049224 | -3.029323023 | 0.002702 | 0.0044  | -2.83568761 |
| KCNK5    | -0.32257331  | 5.3728422  | -3.02864122  | 0.002708 | 0.00441 | -2.83768065 |
| MGA      | -0.232266715 | 2.9896272  | -3.028201855 | 0.002711 | 0.00442 | -2.83896478 |
| EXOC6B   | 0.259962118  | 3.58436105 | 3.02818013   | 0.002712 | 0.00442 | -2.83902827 |
| KLRC4    | 0.108628216  | 0.20124948 | 3.027918075  | 0.002714 | 0.00442 | -2.83979409 |
| SLC25A3  | -0.255613121 | 4.40284164 | -3.027075833 | 0.002721 | 0.00443 | -2.842255   |
| CDK5R1   | 0.187138827  | 1.08219562 | 3.02656822   | 0.002726 | 0.00444 | -2.84373787 |
| ME2      | -0.185289926 | 3.27069121 | -3.026051204 | 0.00273  | 0.00445 | -2.84524796 |
| BAG3     | 0.313588121  | 6.27405634 | 3.025972729  | 0.002731 | 0.00445 | -2.84547715 |
| ANO1     | -0.298981217 | 4.78123244 | -3.025547246 | 0.002734 | 0.00445 | -2.84671969 |
| MPIG6B   | 0.189203414  | 0.80920358 | 3.025221485  | 0.002737 | 0.00446 | -2.8476709  |
| SEMA5B   | -0.29273961  | 1.49424421 | -3.024986644 | 0.002739 | 0.00446 | -2.84835657 |
| PPWD1    | -0.206056015 | 4.22523498 | -3.02481689  | 0.002741 | 0.00446 | -2.84885217 |
| MELK     | 0.226193561  | 1.19814276 | 3.024722018  | 0.002742 | 0.00446 | -2.84912914 |
| TMEM86   | -0.251726744 | 1.97273953 | -3.023925401 | 0.002749 | 0.00447 | -2.85145447 |
| S1PR1    | -0.289532006 | 5.26521868 | -3.023735719 | 0.00275  | 0.00448 | -2.85200807 |
| NCKIPSI  | -0.18191242  | 4.71973481 | -3.023599964 | 0.002751 | 0.00448 | -2.85240426 |
| UBFD1    | -0.229966603 | 4.87961748 | -3.02238922  | 0.002762 | 0.0045  | -2.85593699 |
| GUCA2A   | -0.10693687  | 0.1716129  | -3.021917464 | 0.002766 | 0.0045  | -2.85731313 |
| CEP78    | -0.16291792  | 1.97192542 | -3.02162418  | 0.002769 | 0.00451 | -2.85816855 |
| GSE1     | -0.241187341 | 5.07259537 | -3.020674923 | 0.002777 | 0.00452 | -2.86093674 |
| PCNT     | -0.209082349 | 3.36412842 | -3.02059636  | 0.002778 | 0.00452 | -2.8611658  |
| RNF6     | -0.22088187  | 4.37220366 | -3.020022029 | 0.002783 | 0.00453 | -2.86284021 |
| COL28A1  | -0.175857803 | 0.51412419 | -3.019947296 | 0.002784 | 0.00453 | -2.86305806 |
| IL34     | -0.35620332  | 3.64214162 | -3.019549124 | 0.002787 | 0.00453 | -2.86421869 |
| WDR47    | -0.233417053 | 3.06552968 | -3.017272797 | 0.002807 | 0.00457 | -2.87085122 |
| ATP13A3  | -0.282287021 | 5.38992817 | -3.017272347 | 0.002807 | 0.00457 | -2.87085253 |
| ZNF784   | -0.194205304 | 3.91317812 | -3.016471764 | 0.002815 | 0.00458 | -2.87318407 |
| SRMS     | -0.20179434  | 0.99330757 | -3.016238302 | 0.002817 | 0.00458 | -2.87386388 |
| C11orf86 | 0.122041804  | 0.19463592 | 3.015659866  | 0.002822 | 0.00459 | -2.87554799 |
| MIDN     | 0.305637049  | 5.94153759 | 3.014908439  | 0.002829 | 0.0046  | -2.87773531 |
| KLF1     | -0.046242012 | 0.14273373 | -3.014115043 | 0.002836 | 0.00461 | -2.88004424 |
| DOC2A    | -0.066254674 | 0.14489583 | -3.014095577 | 0.002836 | 0.00461 | -2.88010088 |
| OR7A5    | -0.053028285 | 0.15071541 | -3.013702168 | 0.00284  | 0.00461 | -2.88124556 |
| PLCB3    | -0.147166413 | 4.28584934 | -3.013392047 | 0.002842 | 0.00462 | -2.8821478  |
| RPS15    | -0.230075825 | 8.47048388 | -3.013352607 | 0.002843 | 0.00462 | -2.88226254 |

|         |              |            |              |          |         |             |
|---------|--------------|------------|--------------|----------|---------|-------------|
| THRAP3  | -0.224454816 | 6.78142359 | -3.01281281  | 0.002848 | 0.00463 | -2.88383276 |
| AGRP    | 0.169212084  | 0.35487695 | 3.012803832  | 0.002848 | 0.00463 | -2.88385887 |
| ST18    | 0.02047239   | 0.04011677 | 3.012780121  | 0.002848 | 0.00463 | -2.88392784 |
| LGALS9  | 0.334125815  | 3.52566223 | 3.011892041  | 0.002856 | 0.00464 | -2.88651059 |
| TXLNA   | -0.178155965 | 5.99316287 | -3.011632858 | 0.002858 | 0.00464 | -2.88726422 |
| CDYL2   | -0.187101432 | 1.70371885 | -3.011495212 | 0.00286  | 0.00464 | -2.88766443 |
| VGLL4   | -0.357967945 | 4.24581092 | -3.011265733 | 0.002862 | 0.00465 | -2.88833161 |
| HELZ    | -0.224588809 | 3.06789963 | -3.010808525 | 0.002866 | 0.00465 | -2.88966075 |
| PDK3    | 0.239103476  | 2.47568581 | 3.009163552  | 0.002881 | 0.00468 | -2.89444124 |
| DNAJC1  | -0.161526143 | 0.67054507 | -3.008867947 | 0.002884 | 0.00468 | -2.89530004 |
| MYRF    | 0.412646311  | 0.96710924 | 3.008850278  | 0.002884 | 0.00468 | -2.89535137 |
| TMEM18  | -0.237040202 | 5.83595196 | -3.008114419 | 0.00289  | 0.00469 | -2.89748888 |
| ZNF223  | -0.14792717  | 1.34284135 | -3.007399232 | 0.002897 | 0.0047  | -2.89956586 |
| HSPA2   | -0.254469402 | 2.15179623 | -3.006463586 | 0.002906 | 0.00471 | -2.90228239 |
| DMRTB1  | -0.224063372 | 0.24894397 | -3.00426495  | 0.002926 | 0.00475 | -2.90866276 |
| PCDH11  | -0.048312478 | 0.05167325 | -3.003141302 | 0.002936 | 0.00476 | -2.91192187 |
| SLC35E1 | -0.227860462 | 4.85977158 | -3.002850416 | 0.002939 | 0.00477 | -2.91276539 |
| PDP2    | -0.224064192 | 3.59482773 | -3.002334536 | 0.002944 | 0.00478 | -2.91426117 |
| FAM89B  | 0.240947772  | 5.26767504 | 3.00194387   | 0.002948 | 0.00478 | -2.91539373 |
| FANCI   | 0.20336804   | 2.05379013 | 3.001816001  | 0.002949 | 0.00478 | -2.9157644  |
| CTCFL   | -0.039988699 | 0.03647233 | -3.001073693 | 0.002956 | 0.00479 | -2.91791594 |
| PTTG1IP | -0.205664777 | 8.35747477 | -3.000943406 | 0.002957 | 0.00479 | -2.91829351 |
| TFPI2   | 0.354091311  | 1.0575505  | 3.000716327  | 0.002959 | 0.0048  | -2.91895156 |
| POLA2   | -0.151410187 | 3.15544644 | -2.999870753 | 0.002967 | 0.00481 | -2.92140153 |
| PRSS37  | 0.051782691  | 0.15510298 | 2.99964065   | 0.002969 | 0.00481 | -2.92206812 |
| CD6     | 0.360237896  | 1.58130665 | 2.998803756  | 0.002977 | 0.00483 | -2.92449213 |
| ZNF518A | -0.265308143 | 3.1219875  | -2.99562507  | 0.003007 | 0.00487 | -2.93369326 |
| TNNT2   | 0.071943293  | 0.16406318 | 2.995456127  | 0.003009 | 0.00488 | -2.93418203 |
| ZNF449  | -0.192879825 | 2.24863827 | -2.99505903  | 0.003013 | 0.00488 | -2.93533078 |
| INPP4A  | 0.233951821  | 3.25690519 | 2.995028813  | 0.003013 | 0.00488 | -2.93541819 |
| RALGAP  | -0.203619636 | 2.39190142 | -2.994919728 | 0.003014 | 0.00488 | -2.93573373 |
| ERMAP   | -0.255455334 | 4.26187661 | -2.993916657 | 0.003024 | 0.0049  | -2.93863473 |
| SOX21   | -0.040332425 | 0.06178771 | -2.992432703 | 0.003038 | 0.00492 | -2.94292483 |
| LUC7L3  | -0.240937641 | 5.55450628 | -2.992046284 | 0.003042 | 0.00493 | -2.94404164 |
| NCBP3   | -0.195470518 | 3.42343214 | -2.991809542 | 0.003044 | 0.00493 | -2.9447258  |
| SSX3    | -0.092739086 | 0.16674162 | -2.991337963 | 0.003048 | 0.00494 | -2.94608845 |
| DMXL1   | -0.256499944 | 3.6450059  | -2.991231419 | 0.003049 | 0.00494 | -2.94639628 |
| MSH2    | -0.245455151 | 4.58016849 | -2.99115484  | 0.00305  | 0.00494 | -2.94661754 |
| P2RY14  | -0.245769703 | 1.46252607 | -2.990784108 | 0.003054 | 0.00494 | -2.94768859 |
| CST1    | 0.58402666   | 0.87446641 | 2.99041248   | 0.003057 | 0.00495 | -2.9487621  |

|         |              |            |              |          |         |             |
|---------|--------------|------------|--------------|----------|---------|-------------|
| PLN     | -0.372619848 | 2.43132509 | -2.990030133 | 0.003061 | 0.00495 | -2.94986645 |
| PARG    | -0.210333562 | 3.38738744 | -2.989845313 | 0.003063 | 0.00496 | -2.95040022 |
| HSPA1A  | -0.356538168 | 5.75620198 | -2.988999049 | 0.003071 | 0.00497 | -2.95284391 |
| ZNF683  | 0.430278433  | 1.75289366 | 2.988464337  | 0.003076 | 0.00498 | -2.95438762 |
| KCNK9   | -0.046278116 | 0.04966694 | -2.987719171 | 0.003083 | 0.00499 | -2.95653848 |
| CIT     | -0.232996238 | 1.39867976 | -2.98709604  | 0.00309  | 0.005   | -2.95833671 |
| C6orf62 | -0.18529327  | 7.2568551  | -2.9867211   | 0.003093 | 0.005   | -2.95941854 |
| SLC16A1 | -0.193749374 | 1.9429358  | -2.986231974 | 0.003098 | 0.00501 | -2.96082965 |
| CYP2F1  | 0.021916422  | 0.03492248 | 2.984734928  | 0.003113 | 0.00503 | -2.96514724 |
| FYCO1   | -0.248924128 | 4.91784746 | -2.984501134 | 0.003115 | 0.00504 | -2.96582133 |
| LONRF1  | -0.237063914 | 3.63813627 | -2.984328499 | 0.003117 | 0.00504 | -2.96631906 |
| PCGF5   | -0.230332205 | 4.33878292 | -2.984004049 | 0.00312  | 0.00504 | -2.96725441 |
| SNX22   | 0.541845272  | 6.50326359 | 2.983430489  | 0.003125 | 0.00505 | -2.96890768 |
| RNF115  | -0.180717924 | 4.16318091 | -2.9833794   | 0.003126 | 0.00505 | -2.96905493 |
| RARRES  | 0.605506225  | 4.34581966 | 2.98309299   | 0.003129 | 0.00506 | -2.96988038 |
| NELFA   | -0.197432599 | 4.66133386 | -2.98305907  | 0.003129 | 0.00506 | -2.96997813 |
| SPIN2A  | -0.043761416 | 0.12132762 | -2.982987922 | 0.00313  | 0.00506 | -2.97018317 |
| SLC27A1 | -0.189417128 | 4.45070677 | -2.981917621 | 0.00314  | 0.00507 | -2.97326707 |
| SSX7    | -0.044665468 | 0.07958183 | -2.981840257 | 0.003141 | 0.00508 | -2.97348994 |
| NPLOC4  | -0.16378123  | 4.84316825 | -2.98100132  | 0.00315  | 0.00509 | -2.97590642 |
| ESCO1   | -0.207756103 | 3.87646096 | -2.980763527 | 0.003152 | 0.00509 | -2.97659125 |
| GRID2IP | 0.132908822  | 1.01311355 | 2.979922573  | 0.00316  | 0.0051  | -2.97901272 |
| MFSD13  | -0.209715152 | 3.48125834 | -2.979161465 | 0.003168 | 0.00512 | -2.98120374 |
| MUCL3   | 0.067301683  | 0.2503261  | 2.978993337  | 0.00317  | 0.00512 | -2.98168766 |
| ITCH    | -0.23544301  | 4.70737656 | -2.977887515 | 0.003181 | 0.00514 | -2.98486991 |
| UBQLN1  | -0.228143952 | 5.62005813 | -2.977155095 | 0.003188 | 0.00515 | -2.986977   |
| MAP4    | 0.222060023  | 5.64821711 | 2.976322173  | 0.003196 | 0.00516 | -2.98937265 |
| FBXO34  | -0.235889798 | 5.47762618 | -2.974785793 | 0.003212 | 0.00518 | -2.99378992 |
| SAMD9L  | 0.302287809  | 3.57013759 | 2.974218339  | 0.003218 | 0.00519 | -2.99542088 |
| RAB43   | -0.226827003 | 1.49485372 | -2.973969266 | 0.00322  | 0.0052  | -2.99613667 |
| SERPINF | 0.504300122  | 4.55545326 | 2.97345125   | 0.003225 | 0.00521 | -2.99762517 |
| CCDC15  | -0.19818017  | 1.0554757  | -2.970987454 | 0.00325  | 0.00525 | -3.00470147 |
| CD48    | 0.447209175  | 2.38457734 | 2.969853092  | 0.003262 | 0.00526 | -3.00795765 |
| LRRC8B  | -0.21164043  | 2.96429742 | -2.969783836 | 0.003263 | 0.00526 | -3.00815641 |
| SPTY2D  | -0.24469951  | 3.94988774 | -2.969543517 | 0.003265 | 0.00527 | -3.00884608 |
| OGFR    | -0.180717151 | 5.26329268 | -2.969218603 | 0.003269 | 0.00527 | -3.00977844 |
| NONO    | -0.20569567  | 7.49019459 | -2.969062798 | 0.00327  | 0.00527 | -3.0102255  |
| NDST1   | -0.252444502 | 5.5300164  | -2.967596155 | 0.003285 | 0.0053  | -3.01443272 |
| CHORDC  | -0.198103456 | 2.70672078 | -2.967310149 | 0.003288 | 0.0053  | -3.01525293 |
| SNIP1   | -0.187345741 | 3.51730037 | -2.967146503 | 0.00329  | 0.0053  | -3.01572221 |

|         |              |            |              |          |         |             |
|---------|--------------|------------|--------------|----------|---------|-------------|
| ARL2BP  | -0.282710663 | 2.78699827 | -2.966485778 | 0.003297 | 0.00532 | -3.01761667 |
| BACE2   | -0.222535748 | 3.8534883  | -2.965573606 | 0.003306 | 0.00533 | -3.02023144 |
| C5orf51 | -0.205948292 | 4.31165978 | -2.964461252 | 0.003318 | 0.00535 | -3.02341902 |
| IL20RB  | -0.171339023 | 0.66451236 | -2.963448083 | 0.003328 | 0.00536 | -3.02632141 |
| ZNF254  | -0.234608307 | 3.51360851 | -2.963209919 | 0.003331 | 0.00537 | -3.02700353 |
| NKAIN4  | 0.468065682  | 2.68072082 | 2.963117276  | 0.003332 | 0.00537 | -3.02726885 |
| CDC34   | -0.181409853 | 6.28483346 | -2.963004408 | 0.003333 | 0.00537 | -3.02759209 |
| ZSCAN2  | -0.208730361 | 3.12916593 | -2.961300837 | 0.003351 | 0.0054  | -3.03246948 |
| MARK4   | -0.142095584 | 4.14882271 | -2.960737563 | 0.003357 | 0.00541 | -3.03408157 |
| SCD5    | -0.335969026 | 6.60280581 | -2.960190821 | 0.003363 | 0.00542 | -3.03564608 |
| KIAA051 | -0.173692605 | 2.24147109 | -2.959550993 | 0.003369 | 0.00543 | -3.03747661 |
| SWAP70  | -0.261596265 | 5.12030741 | -2.958351487 | 0.003382 | 0.00545 | -3.04090738 |
| ZIK1    | -0.225873396 | 2.6881285  | -2.957209953 | 0.003394 | 0.00547 | -3.04417113 |
| AIF1    | 0.402182426  | 4.65763902 | 2.95675144   | 0.003399 | 0.00547 | -3.04548173 |
| KLHL26  | -0.215102743 | 4.06714398 | -2.95649175  | 0.003402 | 0.00548 | -3.04622393 |
| UFL1    | -0.23213002  | 5.11431097 | -2.956215856 | 0.003405 | 0.00548 | -3.04701238 |
| TLE3    | -0.228665666 | 4.43094043 | -2.954425101 | 0.003424 | 0.00551 | -3.05212833 |
| TLK1    | -0.189968958 | 4.3808754  | -2.954302958 | 0.003425 | 0.00551 | -3.05247718 |
| PIK3CG  | 0.249390748  | 1.20034519 | 2.954301949  | 0.003425 | 0.00551 | -3.05248006 |
| FBXL6   | -0.214111601 | 3.36190274 | -2.954018651 | 0.003428 | 0.00552 | -3.05328911 |
| LZTS2   | 0.231637353  | 5.9605213  | 2.953695538  | 0.003432 | 0.00552 | -3.05421177 |
| AGTRAP  | -0.184196494 | 6.16386835 | -2.95352312  | 0.003434 | 0.00552 | -3.05470408 |
| TPT1    | -0.19564794  | 10.6463216 | -2.952667273 | 0.003443 | 0.00554 | -3.0571474  |
| LIPM    | 0.147240176  | 0.35021388 | 2.951834026  | 0.003452 | 0.00555 | -3.05952557 |
| ADAMDE  | 0.442260506  | 1.12756307 | 2.951552258  | 0.003455 | 0.00556 | -3.06032963 |
| FUT4    | -0.154168616 | 1.74134195 | -2.951490786 | 0.003456 | 0.00556 | -3.06050503 |
| RAB39A  | 0.089860188  | 0.2480202  | 2.951249317  | 0.003458 | 0.00556 | -3.06119401 |
| ACTL6A  | -0.207281856 | 4.69699457 | -2.950957963 | 0.003461 | 0.00557 | -3.06202527 |
| MPZL3   | 0.300802539  | 4.65419705 | 2.950556634  | 0.003466 | 0.00557 | -3.06317016 |
| ZFPM2   | -0.297389252 | 1.51674143 | -2.950542616 | 0.003466 | 0.00557 | -3.06321014 |
| RPL3    | -0.226157577 | 10.679806  | -2.950451505 | 0.003467 | 0.00557 | -3.06347004 |
| FBXW11  | -0.234290664 | 4.88772899 | -2.950361887 | 0.003468 | 0.00557 | -3.06372567 |
| ZBTB7B  | -0.198656799 | 5.46317217 | -2.95020277  | 0.00347  | 0.00558 | -3.06417952 |
| NDUFAF  | -0.149943068 | 3.33697759 | -2.950010138 | 0.003472 | 0.00558 | -3.06472894 |
| MICAL1  | 0.289021338  | 3.37950952 | 2.949541404  | 0.003477 | 0.00559 | -3.0660657  |
| SLC38A9 | -0.145312217 | 2.13554231 | -2.949121947 | 0.003481 | 0.00559 | -3.06726177 |
| JADE1   | -0.24531326  | 5.1916391  | -2.948955366 | 0.003483 | 0.0056  | -3.06773673 |
| ZFYVE11 | -0.195321595 | 3.3064753  | -2.948461865 | 0.003488 | 0.0056  | -3.06914365 |
| ZNF529  | -0.165547147 | 2.82837897 | -2.948407459 | 0.003489 | 0.00561 | -3.06929874 |
| ABO     | -0.318228828 | 4.82237358 | -2.948008571 | 0.003493 | 0.00561 | -3.07043575 |

|          |              |            |              |          |         |             |
|----------|--------------|------------|--------------|----------|---------|-------------|
| GPR162   | -0.351753882 | 1.95438402 | -2.946560094 | 0.003509 | 0.00564 | -3.07456335 |
| RBMX     | -0.198202294 | 6.50119023 | -2.946416493 | 0.003511 | 0.00564 | -3.07497245 |
| ZNF654   | -0.20910778  | 3.28249583 | -2.945667357 | 0.003519 | 0.00565 | -3.07710636 |
| CHI3L2   | 0.446624804  | 4.17356386 | 2.94528809   | 0.003523 | 0.00566 | -3.07818651 |
| C3orf80  | 0.193741435  | 0.83150927 | 2.944606101  | 0.003531 | 0.00567 | -3.08012847 |
| BRINP3   | -0.140534423 | 0.35978633 | -2.944209905 | 0.003535 | 0.00568 | -3.08125645 |
| UBE3B    | -0.181061038 | 4.05768149 | -2.943991922 | 0.003538 | 0.00568 | -3.08187699 |
| EFL1     | -0.204610034 | 4.02975554 | -2.943892366 | 0.003539 | 0.00568 | -3.08216038 |
| PLEKHG   | -0.233354382 | 3.69904383 | -2.942058487 | 0.003559 | 0.00571 | -3.08737909 |
| EIF4A2   | -0.225128442 | 8.0432942  | -2.941762301 | 0.003562 | 0.00572 | -3.08822167 |
| MALRD1   | -0.109373302 | 0.2638753  | -2.941677427 | 0.003563 | 0.00572 | -3.0884631  |
| CALU     | -0.287332844 | 6.57243885 | -2.941653452 | 0.003563 | 0.00572 | -3.0885313  |
| DPY19L1  | 0.295548085  | 4.05095238 | 2.941084302  | 0.00357  | 0.00573 | -3.09015011 |
| SLC22A4  | 0.212860994  | 1.65708894 | 2.940277934  | 0.003579 | 0.00574 | -3.09244314 |
| TUBA4A   | 0.321107852  | 4.90804395 | 2.938510158  | 0.003599 | 0.00577 | -3.09746802 |
| RANBP9   | -0.187868183 | 5.40098419 | -2.938426262 | 0.0036   | 0.00577 | -3.09770642 |
| ZNF675   | -0.264254159 | 2.35826408 | -2.938095123 | 0.003603 | 0.00578 | -3.09864734 |
| AGBL2    | -0.145849801 | 0.78742521 | -2.938026693 | 0.003604 | 0.00578 | -3.09884177 |
| SLC45A3  | 0.19990857   | 1.17617341 | 2.937289111  | 0.003612 | 0.00579 | -3.10093718 |
| DNAJB7   | -0.062567088 | 0.23029274 | -2.93477664  | 0.003641 | 0.00584 | -3.10807121 |
| BTN3A2   | 0.320095108  | 3.94306103 | 2.934574433  | 0.003643 | 0.00584 | -3.10864511 |
| ERICH5   | -0.368461761 | 1.63086276 | -2.934475799 | 0.003644 | 0.00584 | -3.10892504 |
| TNKS1BI  | -0.222523489 | 6.27273683 | -2.934473099 | 0.003644 | 0.00584 | -3.10893271 |
| EIF3E    | -0.194084179 | 7.11267824 | -2.934472682 | 0.003644 | 0.00584 | -3.10893389 |
| BIRC6    | -0.272152281 | 3.98659673 | -2.933817923 | 0.003652 | 0.00585 | -3.11079193 |
| PRPF39   | -0.218509559 | 3.87268667 | -2.933541906 | 0.003655 | 0.00586 | -3.11157508 |
| KLRC2    | 0.105949425  | 0.2302971  | 2.932513364  | 0.003666 | 0.00587 | -3.11449277 |
| C19orf48 | -0.244288467 | 5.56020462 | -2.931494778 | 0.003678 | 0.00589 | -3.11738128 |
| BTLA     | 0.241863367  | 0.5578194  | 2.931441321  | 0.003679 | 0.00589 | -3.11753285 |
| INTS3    | -0.270918327 | 3.82693236 | -2.930680764 | 0.003687 | 0.00591 | -3.11968899 |
| FAM166A  | -0.094509719 | 0.21504695 | -2.930611567 | 0.003688 | 0.00591 | -3.11988514 |
| ANKRD1   | -0.189895333 | 3.90777406 | -2.930196777 | 0.003693 | 0.00591 | -3.1210608  |
| PIEZO2   | -0.272603671 | 1.52877806 | -2.929915911 | 0.003696 | 0.00592 | -3.12185679 |
| STXBP2   | -0.179050722 | 5.11796887 | -2.929675305 | 0.003699 | 0.00592 | -3.12253862 |
| FAM219E  | -0.243486147 | 3.41457764 | -2.928892241 | 0.003708 | 0.00594 | -3.12475731 |
| IRGQ     | -0.164878069 | 3.4920798  | -2.928804794 | 0.003709 | 0.00594 | -3.12500504 |
| LY96     | 0.379902496  | 3.67018351 | 2.928593343  | 0.003711 | 0.00594 | -3.12560405 |
| EGFLAM   | -0.266466469 | 2.07458151 | -2.928384042 | 0.003714 | 0.00594 | -3.12619692 |
| C4orf48  | -0.528691015 | 4.86992671 | -2.926812591 | 0.003732 | 0.00597 | -3.13064698 |
| RBM15    | -0.144300522 | 2.7172089  | -2.926582161 | 0.003735 | 0.00598 | -3.13129934 |

|         |              |            |              |          |         |             |
|---------|--------------|------------|--------------|----------|---------|-------------|
| IL6     | 0.538911064  | 1.55815724 | 2.92624443   | 0.003739 | 0.00598 | -3.13225537 |
| TRPS1   | -0.19868655  | 2.52619505 | -2.926072191 | 0.003741 | 0.00598 | -3.13274289 |
| GFOD1   | -0.200381082 | 1.78184349 | -2.925284566 | 0.00375  | 0.006   | -3.13497194 |
| GPRC5D  | -0.16830876  | 1.12996813 | -2.925012827 | 0.003753 | 0.006   | -3.13574085 |
| ATG2B   | -0.217365435 | 3.14516308 | -2.924845849 | 0.003755 | 0.00601 | -3.1362133  |
| EMILIN1 | 0.4313518    | 3.51761982 | 2.923843557  | 0.003767 | 0.00602 | -3.13904866 |
| MSRB3   | -0.329712764 | 3.17792976 | -2.920856584 | 0.003802 | 0.00608 | -3.14749306 |
| HAAO    | -0.267526292 | 2.99290555 | -2.920280703 | 0.003809 | 0.00609 | -3.14912019 |
| SPIRE1  | 0.344905123  | 3.05491233 | 2.92013914   | 0.00381  | 0.00609 | -3.14952012 |
| FAM170A | -0.047001811 | 0.10464753 | -2.919965764 | 0.003812 | 0.00609 | -3.15000991 |
| SMC1A   | -0.25026711  | 4.36916634 | -2.919884652 | 0.003813 | 0.0061  | -3.15023904 |
| KCNS2   | 0.034027306  | 0.06416263 | 2.918976482  | 0.003824 | 0.00611 | -3.1528041  |
| RBM7    | -0.207702055 | 3.15828074 | -2.918702283 | 0.003827 | 0.00612 | -3.15357841 |
| DLGAP4  | 0.198037044  | 5.35356523 | 2.918678134  | 0.003828 | 0.00612 | -3.15364661 |
| UPF1    | -0.192655214 | 5.86487255 | -2.917822885 | 0.003838 | 0.00613 | -3.15606128 |
| IPPK    | -0.193441731 | 1.49118642 | -2.917580805 | 0.003841 | 0.00614 | -3.15674464 |
| PLCE1   | -0.364505269 | 3.24088863 | -2.91716145  | 0.003846 | 0.00614 | -3.1579283  |
| PHF21B  | -0.238028754 | 0.83768877 | -2.916780567 | 0.00385  | 0.00615 | -3.15900323 |
| XPO4    | -0.209892256 | 3.07085533 | -2.916733491 | 0.003851 | 0.00615 | -3.15913608 |
| TIPARP  | 0.442192895  | 5.41523914 | 2.915250929  | 0.003869 | 0.00618 | -3.16331887 |
| BTBD2   | -0.173386605 | 5.58996619 | -2.914803441 | 0.003874 | 0.00619 | -3.16458098 |
| CCDC68  | -0.203704209 | 1.13604332 | -2.914242068 | 0.003881 | 0.0062  | -3.16616405 |
| SLC38A7 | -0.148137144 | 3.51059103 | -2.913957302 | 0.003884 | 0.0062  | -3.16696698 |
| CXCR6   | 0.374943619  | 1.55057174 | 2.912441034  | 0.003902 | 0.00623 | -3.17124102 |
| SMAD1   | -0.280982455 | 2.74368204 | -2.912063639 | 0.003907 | 0.00624 | -3.17230449 |
| BNIP2   | -0.202339209 | 4.00909316 | -2.910867652 | 0.003921 | 0.00626 | -3.17567386 |
| LRMP    | -0.323525295 | 2.09004271 | -2.910752488 | 0.003923 | 0.00626 | -3.17599823 |
| POLK    | -0.231367294 | 3.5169869  | -2.910338922 | 0.003928 | 0.00627 | -3.17716299 |
| MFSD14  | -0.253083525 | 5.57795418 | -2.909429339 | 0.003939 | 0.00629 | -3.17972419 |
| GPR82   | 0.14204347   | 0.5274531  | 2.908365287  | 0.003952 | 0.00631 | -3.18271939 |
| APLP1   | -0.331433099 | 1.98861481 | -2.907342727 | 0.003964 | 0.00633 | -3.18559682 |
| NDST2   | -0.10601158  | 1.17887738 | -2.906964437 | 0.003969 | 0.00633 | -3.18666107 |
| FIBCD1  | 0.483332171  | 1.4184184  | 2.906834723  | 0.003971 | 0.00633 | -3.18702597 |
| SHANK1  | -0.131048351 | 0.29032195 | -2.905012547 | 0.003993 | 0.00637 | -3.1921503  |
| ABCA4   | 0.166044705  | 0.84203862 | 2.904613364  | 0.003998 | 0.00638 | -3.19327248 |
| PLB1    | -0.164411347 | 0.97758979 | -2.904589202 | 0.003998 | 0.00638 | -3.1933404  |
| RALGAP  | -0.305188982 | 4.47617211 | -2.904428917 | 0.004    | 0.00638 | -3.19379095 |
| SNX10   | 0.319367739  | 2.63758725 | 2.903306659  | 0.004014 | 0.0064  | -3.19694488 |
| CSNK2B  | -0.174804951 | 5.97857882 | -2.903083528 | 0.004017 | 0.0064  | -3.19757182 |
| SDAD1   | -0.29049532  | 4.66939415 | -2.902660629 | 0.004022 | 0.00641 | -3.19875993 |

|         |              |            |              |          |         |             |
|---------|--------------|------------|--------------|----------|---------|-------------|
| SNRNP2  | -0.22000189  | 5.86133709 | -2.902414832 | 0.004025 | 0.00642 | -3.1994504  |
| NLRP12  | 0.061358084  | 0.22723384 | 2.901979675  | 0.004031 | 0.00642 | -3.20067269 |
| OPRD1   | -0.052105504 | 0.12406081 | -2.901847678 | 0.004032 | 0.00643 | -3.20104341 |
| BCL9L   | 0.351903243  | 3.28555009 | 2.901348859  | 0.004039 | 0.00644 | -3.20244423 |
| ERO1A   | 0.178240688  | 4.62083212 | 2.900976692  | 0.004043 | 0.00644 | -3.20348924 |
| TSPAN8  | -0.266957674 | 0.59001713 | -2.900864631 | 0.004045 | 0.00644 | -3.20380387 |
| FHOD1   | 0.26130379   | 5.05465856 | 2.900679729  | 0.004047 | 0.00645 | -3.20432299 |
| GYPE    | -0.236771984 | 0.66227692 | -2.899200841 | 0.004065 | 0.00648 | -3.20847391 |
| GOLGB1  | -0.230661157 | 5.53838115 | -2.899015839 | 0.004068 | 0.00648 | -3.20899303 |
| ULK3    | -0.220580239 | 5.16772407 | -2.89857558  | 0.004073 | 0.00649 | -3.21022828 |
| EEF1A1  | -0.253603915 | 11.6416596 | -2.898562408 | 0.004073 | 0.00649 | -3.21026524 |
| MMAA    | -0.122902317 | 2.28152051 | -2.897062409 | 0.004092 | 0.00652 | -3.21447252 |
| NKRF    | -0.160090523 | 3.28430619 | -2.896089194 | 0.004105 | 0.00654 | -3.21720116 |
| DCAF16  | -0.200354956 | 4.33990202 | -2.894867419 | 0.00412  | 0.00656 | -3.22062547 |
| LYPLA2  | -0.235628445 | 6.86902904 | -2.894704515 | 0.004122 | 0.00656 | -3.22108195 |
| TRPM2   | 0.235623046  | 1.48756932 | 2.894527275  | 0.004124 | 0.00657 | -3.22157857 |
| CADM3   | 0.607517118  | 1.85367057 | 2.893587333  | 0.004136 | 0.00658 | -3.22421177 |
| ADCY10  | -0.038052583 | 0.10452204 | -2.893251782 | 0.004141 | 0.00659 | -3.22515161 |
| RNGTT   | -0.189976571 | 3.3916422  | -2.892694184 | 0.004148 | 0.0066  | -3.22671314 |
| MAG     | 0.571018844  | 2.53864878 | 2.892384887  | 0.004152 | 0.00661 | -3.2275792  |
| COL5A2  | 0.416518368  | 4.08439138 | 2.892243935  | 0.004154 | 0.00661 | -3.22797384 |
| ZNF71   | -0.132468926 | 2.23472317 | -2.892207602 | 0.004154 | 0.00661 | -3.22807557 |
| HELLS   | 0.191890815  | 1.49035569 | 2.891432598  | 0.004164 | 0.00662 | -3.23024514 |
| SETDB1  | -0.189453738 | 3.99593598 | -2.889996237 | 0.004182 | 0.00665 | -3.23426468 |
| CRABP2  | 0.742886558  | 6.82382003 | 2.88991464   | 0.004183 | 0.00665 | -3.23449297 |
| FAT4    | -0.287951397 | 2.14783424 | -2.889831741 | 0.004185 | 0.00665 | -3.23472489 |
| SLC47A2 | -0.237034988 | 0.53791973 | -2.889732464 | 0.004186 | 0.00666 | -3.23500262 |
| PANK3   | -0.250716893 | 3.99650276 | -2.889470437 | 0.004189 | 0.00666 | -3.23573562 |
| LRRC39  | -0.214709646 | 1.30910685 | -2.888577763 | 0.004201 | 0.00668 | -3.23823233 |
| TAZ     | -0.180262937 | 3.94462787 | -2.888329792 | 0.004204 | 0.00668 | -3.23892575 |
| SPATA11 | -0.464449682 | 2.69243603 | -2.887591595 | 0.004214 | 0.0067  | -3.24098969 |
| MEX3D   | 0.277151863  | 4.33916581 | 2.887527603  | 0.004214 | 0.0067  | -3.24116859 |
| CLIC1   | -0.20971322  | 8.89335967 | -2.887407676 | 0.004216 | 0.0067  | -3.24150384 |
| PSME2   | -0.213440909 | 6.34905579 | -2.887379553 | 0.004216 | 0.0067  | -3.24158245 |
| CEP131  | -0.170264872 | 3.70500425 | -2.88699879  | 0.004221 | 0.00671 | -3.24264677 |
| RFPL3   | -0.029909419 | 0.07184682 | -2.886425162 | 0.004229 | 0.00672 | -3.24424995 |
| TEC     | 0.193476618  | 2.52724036 | 2.885941899  | 0.004235 | 0.00673 | -3.24560033 |
| TEX35   | -0.020942551 | 0.03245772 | -2.885859894 | 0.004236 | 0.00673 | -3.24582946 |
| ARSD    | -0.210624909 | 5.62197838 | -2.884883745 | 0.004249 | 0.00675 | -3.24855641 |
| MBD6    | -0.250034222 | 5.60034162 | -2.88405895  | 0.00426  | 0.00677 | -3.25085986 |

|         |              |            |              |          |         |             |
|---------|--------------|------------|--------------|----------|---------|-------------|
| GABRQ   | -0.20525118  | 0.37030122 | -2.882878841 | 0.004275 | 0.00679 | -3.25415455 |
| BCR     | -0.26640544  | 4.9385235  | -2.88266552  | 0.004278 | 0.00679 | -3.25474997 |
| TRMT44  | -0.204236741 | 3.04827128 | -2.881695325 | 0.004291 | 0.00681 | -3.25745748 |
| LNK2    | -0.250780389 | 3.82086626 | -2.881311168 | 0.004296 | 0.00682 | -3.25852931 |
| C1R     | 0.546886634  | 4.53628415 | 2.879694705  | 0.004317 | 0.00685 | -3.26303788 |
| REEP2   | 0.345142018  | 2.03073061 | 2.879536805  | 0.004319 | 0.00686 | -3.26347816 |
| TMEM72  | -0.245452378 | 0.68617207 | -2.878904208 | 0.004328 | 0.00687 | -3.26524184 |
| PROSER  | -0.190645249 | 3.67824054 | -2.877641149 | 0.004344 | 0.00689 | -3.26876215 |
| RAD1    | -0.188983961 | 3.55210215 | -2.876880422 | 0.004354 | 0.00691 | -3.27088171 |
| RNF138  | -0.200712365 | 3.86896293 | -2.876699329 | 0.004357 | 0.00691 | -3.27138619 |
| HLA-C   | 0.363193958  | 9.89685386 | 2.875979644  | 0.004367 | 0.00693 | -3.27339079 |
| TRIM11  | -0.141477273 | 3.1612259  | -2.875832815 | 0.004369 | 0.00693 | -3.27379971 |
| SSX5    | -0.212092927 | 0.57931256 | -2.875572224 | 0.004372 | 0.00694 | -3.2745254  |
| NMI     | -0.221409868 | 3.90787445 | -2.874533953 | 0.004386 | 0.00696 | -3.27741617 |
| PCSK9   | 0.074430582  | 0.1096458  | 2.87446937   | 0.004387 | 0.00696 | -3.27759595 |
| SLC2A1C | -0.295367858 | 4.97449697 | -2.874416323 | 0.004388 | 0.00696 | -3.27774362 |
| SLC38A1 | -0.316911113 | 4.85954763 | -2.874236486 | 0.00439  | 0.00696 | -3.2782442  |
| PNP     | 0.510478392  | 5.16630033 | 2.873884856  | 0.004395 | 0.00697 | -3.2792229  |
| FOXO4   | -0.209880632 | 4.60247983 | -2.873854266 | 0.004395 | 0.00697 | -3.27930804 |
| PCDHB5  | -0.533050941 | 2.49595435 | -2.87340592  | 0.004401 | 0.00698 | -3.28055575 |
| FOXSI   | -0.328260922 | 2.75230161 | -2.873327488 | 0.004402 | 0.00698 | -3.280774   |
| MAP6D1  | -0.15101117  | 1.36317523 | -2.8731119   | 0.004405 | 0.00698 | -3.28137389 |
| JRKL    | -0.226265347 | 3.80577122 | -2.873050047 | 0.004406 | 0.00698 | -3.28154599 |
| CROCC2  | -0.058551618 | 0.07208088 | -2.872041442 | 0.00442  | 0.007   | -3.28435186 |
| LCAT    | -0.281678477 | 3.4355816  | -2.87132419  | 0.004429 | 0.00702 | -3.28634665 |
| ANXA5   | -0.221500304 | 8.56549159 | -2.87127982  | 0.00443  | 0.00702 | -3.28647004 |
| EPHA2   | 0.355455551  | 5.58252867 | 2.871096659  | 0.004432 | 0.00702 | -3.28697936 |
| PRKX    | -0.330515918 | 4.80537256 | -2.870645885 | 0.004439 | 0.00703 | -3.2882327  |
| MSLN    | 0.398445123  | 0.9294092  | 2.870486193  | 0.004441 | 0.00703 | -3.28867666 |
| LY9     | 0.234024908  | 0.54151748 | 2.868957252  | 0.004462 | 0.00707 | -3.29292616 |
| RGMB    | -0.192300683 | 3.06109122 | -2.868809057 | 0.004464 | 0.00707 | -3.29333794 |
| VAT1    | 0.209765114  | 7.6477091  | 2.868501109  | 0.004468 | 0.00707 | -3.29419354 |
| KCNIP2  | -0.167497033 | 1.03564338 | -2.867760359 | 0.004478 | 0.00709 | -3.2962513  |
| ABCA3   | -0.241343453 | 5.44156666 | -2.86758535  | 0.00448  | 0.00709 | -3.29673738 |
| ADAM10  | -0.239466302 | 4.41995575 | -2.865623165 | 0.004507 | 0.00714 | -3.30218548 |
| ITGB3BF | -0.188043124 | 2.89825276 | -2.865171825 | 0.004514 | 0.00714 | -3.30343815 |
| TBC1D2  | -0.162207418 | 4.76867764 | -2.864918086 | 0.004517 | 0.00715 | -3.30414231 |
| RETREG  | -0.169448021 | 5.68572277 | -2.864838147 | 0.004518 | 0.00715 | -3.30436414 |
| CXCL10  | 0.637738014  | 3.15409112 | 2.86466263   | 0.004521 | 0.00715 | -3.30485117 |
| RPGRIP  | -0.062104436 | 0.37481854 | -2.864505884 | 0.004523 | 0.00716 | -3.30528609 |



|         |              |            |              |          |         |             |
|---------|--------------|------------|--------------|----------|---------|-------------|
| TP53BP1 | -0.295697509 | 3.83425584 | -2.863303285 | 0.004539 | 0.00718 | -3.30862222 |
| SLC8A1  | 0.128622678  | 0.69402466 | 2.861634452  | 0.004563 | 0.00722 | -3.31324954 |
| SYCP2   | -0.156634252 | 0.81932462 | -2.861232448 | 0.004568 | 0.00723 | -3.31436383 |
| MMP19   | 0.303590362  | 1.74033726 | 2.859405003  | 0.004594 | 0.00727 | -3.31942738 |
| ASCL2   | -0.255141311 | 1.2282945  | -2.859146397 | 0.004597 | 0.00727 | -3.32014369 |
| CACNA1  | -0.234698331 | 1.54980955 | -2.859106679 | 0.004598 | 0.00727 | -3.3202537  |
| PTGDR2  | -0.052435209 | 0.13996785 | -2.857110558 | 0.004626 | 0.00732 | -3.32578061 |
| CCNE1   | -0.156059415 | 2.05576946 | -2.857031102 | 0.004627 | 0.00732 | -3.32600054 |
| SAV1    | -0.193684814 | 5.25469225 | -2.856892136 | 0.004629 | 0.00732 | -3.32638516 |
| CACNB3  | -0.22142047  | 3.48331973 | -2.856745406 | 0.004631 | 0.00732 | -3.32679126 |
| SETD1A  | -0.159148545 | 4.34739276 | -2.856679351 | 0.004632 | 0.00732 | -3.32697407 |
| FEM1B   | -0.203243805 | 4.71205541 | -2.855275606 | 0.004652 | 0.00735 | -3.33085808 |
| ZNF718  | -0.251681614 | 2.62871293 | -2.854917213 | 0.004657 | 0.00736 | -3.33184943 |
| NPC1L1  | 0.02091559   | 0.04354778 | 2.853275486  | 0.00468  | 0.0074  | -3.3363891  |
| TYW5    | -0.144619843 | 1.72418832 | -2.853177328 | 0.004682 | 0.0074  | -3.33666045 |
| TIRAP   | -0.189697367 | 2.66967852 | -2.852024898 | 0.004698 | 0.00742 | -3.33984556 |
| SGCB    | -0.300830129 | 4.62538553 | -2.851333562 | 0.004708 | 0.00744 | -3.34175571 |
| ZFP91   | -0.243845109 | 5.31058733 | -2.850491237 | 0.00472  | 0.00746 | -3.34408245 |
| UNC5B   | 0.349939393  | 4.42945628 | 2.850407628  | 0.004722 | 0.00746 | -3.34431337 |
| FRZB    | -0.375474283 | 3.58797847 | -2.849647954 | 0.004733 | 0.00747 | -3.34641119 |
| PHF12   | -0.18285729  | 3.97485663 | -2.849259303 | 0.004738 | 0.00748 | -3.34748424 |
| RAB2B   | -0.181735412 | 4.42144677 | -2.84831752  | 0.004752 | 0.0075  | -3.3500839  |
| CD209   | 0.232881918  | 1.06459119 | 2.847945876  | 0.004757 | 0.00751 | -3.35110954 |
| ZMYM2   | -0.222883637 | 4.14755852 | -2.847175691 | 0.004768 | 0.00753 | -3.35323467 |
| IFI35   | -0.244671048 | 5.36160058 | -2.846829994 | 0.004773 | 0.00754 | -3.35418835 |
| NEO1    | -0.240514944 | 4.3999497  | -2.846779391 | 0.004774 | 0.00754 | -3.35432795 |
| PRR15   | 0.938784591  | 5.84505424 | 2.846090206  | 0.004784 | 0.00755 | -3.35622887 |
| ZNF354C | -0.209979551 | 2.38104168 | -2.845716764 | 0.004789 | 0.00756 | -3.35725872 |
| IFI6    | -0.399776658 | 8.89312502 | -2.845694144 | 0.00479  | 0.00756 | -3.3573211  |
| ATP6AP1 | -0.151860192 | 1.79404327 | -2.844693874 | 0.004804 | 0.00758 | -3.36007893 |
| EML3    | -0.205384274 | 4.91315244 | -2.843681816 | 0.004819 | 0.0076  | -3.36286833 |
| VHL     | -0.262403455 | 4.71251523 | -2.841756067 | 0.004848 | 0.00765 | -3.36817345 |
| NUDT14  | -0.202665287 | 5.83791923 | -2.840921418 | 0.00486  | 0.00767 | -3.37047173 |
| GZMK    | 0.512729104  | 1.71543094 | 2.840365398  | 0.004868 | 0.00768 | -3.37200242 |
| OSBPL1  | -0.205097321 | 3.8309373  | -2.839748195 | 0.004877 | 0.00769 | -3.37370122 |
| NUMBL   | 0.267326511  | 3.02710148 | 2.839366536  | 0.004883 | 0.0077  | -3.37475153 |
| DCAF12L | -0.139134629 | 0.2540879  | -2.838569634 | 0.004895 | 0.00772 | -3.37694415 |
| CCDC38  | -0.0259086   | 0.07465069 | -2.83856116  | 0.004895 | 0.00772 | -3.37696746 |
| ITPR1L2 | 0.342303818  | 3.92470095 | 2.838358841  | 0.004898 | 0.00772 | -3.37752403 |
| GRAPL   | -0.049232826 | 0.10228365 | -2.838011423 | 0.004903 | 0.00773 | -3.37847968 |

|         |              |            |              |          |         |             |
|---------|--------------|------------|--------------|----------|---------|-------------|
| IL32    | 0.412576684  | 3.83662673 | 2.837853133  | 0.004905 | 0.00773 | -3.37891505 |
| GEMIN4  | -0.204987346 | 3.86941943 | -2.837846756 | 0.004905 | 0.00773 | -3.37893259 |
| WDHD1   | 0.182750306  | 1.79104131 | 2.836656717  | 0.004923 | 0.00776 | -3.38220503 |
| SERPINF | 0.266201866  | 1.5740136  | 2.836636476  | 0.004923 | 0.00776 | -3.38226068 |
| HK2     | -0.346045767 | 5.4549269  | -2.836438287 | 0.004926 | 0.00776 | -3.38280554 |
| MICALL2 | 0.235786902  | 3.19455974 | 2.836142109  | 0.004931 | 0.00777 | -3.38361974 |
| LILRB1  | 0.254794351  | 1.39050717 | 2.835249854  | 0.004944 | 0.00779 | -3.38607205 |
| UBE2V1  | -0.172797768 | 2.30298034 | -2.834502248 | 0.004955 | 0.00781 | -3.38812625 |
| APOBEC  | 0.279950723  | 1.91975464 | 2.834407315  | 0.004957 | 0.00781 | -3.38838706 |
| VNN1    | 0.18949131   | 0.76305065 | 2.834395845  | 0.004957 | 0.00781 | -3.38841857 |
| CHIA    | -0.260775781 | 1.09240949 | -2.834046311 | 0.004962 | 0.00781 | -3.38937877 |
| ATP13A2 | -0.180651566 | 4.83005796 | -2.833966619 | 0.004964 | 0.00782 | -3.38959768 |
| NR6A1   | -0.236799799 | 2.53434789 | -2.833412392 | 0.004972 | 0.00783 | -3.39111993 |
| MAP3K7  | -0.190867027 | 1.93813313 | -2.833376172 | 0.004972 | 0.00783 | -3.39121941 |
| HMGN4   | -0.304551906 | 6.99055217 | -2.833328235 | 0.004973 | 0.00783 | -3.39135106 |
| ENPP1   | -0.460254387 | 4.38561789 | -2.833002358 | 0.004978 | 0.00784 | -3.39224596 |
| MYO9B   | 0.189291248  | 4.22111791 | 2.831157211  | 0.005006 | 0.00788 | -3.39731118 |
| UBASH3  | -0.228309563 | 1.48936814 | -2.83084595  | 0.005011 | 0.00789 | -3.39816533 |
| KRT8    | -0.238536125 | 8.94893558 | -2.829960521 | 0.005024 | 0.00791 | -3.40059462 |
| TSEN54  | -0.162584676 | 4.63275282 | -2.829391102 | 0.005033 | 0.00792 | -3.40215652 |
| SIGLEC1 | -0.134168148 | 0.47346533 | -2.828679998 | 0.005044 | 0.00794 | -3.40410664 |
| APOBEC  | 0.206019875  | 0.78496213 | 2.827937087  | 0.005055 | 0.00795 | -3.40614349 |
| MAMDC2  | -0.331894697 | 2.01430571 | -2.825642752 | 0.00509  | 0.00801 | -3.41243075 |
| LRRC58  | -0.230887945 | 4.22180703 | -2.825450983 | 0.005093 | 0.00801 | -3.41295604 |
| BAG4    | -0.184122735 | 3.86265863 | -2.825093997 | 0.005099 | 0.00802 | -3.41393381 |
| HSD3B7  | 0.2493268    | 3.53409881 | 2.824753437  | 0.005104 | 0.00803 | -3.41486649 |
| ZNF304  | -0.204468137 | 3.44146188 | -2.824661321 | 0.005105 | 0.00803 | -3.41511874 |
| RAB18   | -0.223477189 | 5.79108211 | -2.824550681 | 0.005107 | 0.00803 | -3.41542171 |
| TGS1    | -0.205190274 | 3.8696191  | -2.824155605 | 0.005113 | 0.00804 | -3.41650348 |
| NKX6-2  | -0.018414494 | 0.02679843 | -2.823486938 | 0.005124 | 0.00805 | -3.41833404 |
| SH3D19  | -0.23722249  | 4.77879534 | -2.822256498 | 0.005143 | 0.00808 | -3.42170148 |
| MAT1A   | -0.224921901 | 0.56175454 | -2.821818271 | 0.005149 | 0.00809 | -3.42290047 |
| LITAF   | -0.231665355 | 6.94928642 | -2.821815761 | 0.00515  | 0.00809 | -3.42290734 |
| ARHGAP  | -0.324415306 | 2.12839595 | -2.821455416 | 0.005155 | 0.0081  | -3.42389312 |
| CERS5   | -0.180088134 | 4.48196945 | -2.820726031 | 0.005166 | 0.00812 | -3.42588809 |
| NTRK2   | -0.345683336 | 6.08393182 | -2.818646138 | 0.005199 | 0.00817 | -3.43157425 |
| FREM3   | 0.103589217  | 0.10250899 | 2.817508008  | 0.005217 | 0.0082  | -3.43468408 |
| MED13   | 0.325403838  | 4.96217033 | 2.816583479  | 0.005232 | 0.00822 | -3.4372094  |
| LRRN3   | -0.53728516  | 3.23487389 | -2.816069373 | 0.00524  | 0.00823 | -3.43861332 |
| PI16    | -0.548249792 | 1.9756553  | -2.814643073 | 0.005262 | 0.00826 | -3.44250701 |

|          |              |            |              |          |         |             |
|----------|--------------|------------|--------------|----------|---------|-------------|
| RDH10    | -0.254915392 | 3.26379269 | -2.814173903 | 0.00527  | 0.00828 | -3.44378741 |
| ATG7     | -0.143469451 | 3.09514514 | -2.813902311 | 0.005274 | 0.00828 | -3.44452851 |
| CXCL11   | 0.5013682    | 1.55783636 | 2.81381693   | 0.005275 | 0.00828 | -3.44476147 |
| LFNG     | 0.251304441  | 2.94559465 | 2.812722638  | 0.005293 | 0.00831 | -3.44774673 |
| SLC23A2  | -0.264399011 | 4.93881321 | -2.811333786 | 0.005315 | 0.00834 | -3.45153398 |
| KIF23    | 0.174030191  | 0.91252407 | 2.811110814  | 0.005319 | 0.00835 | -3.45214183 |
| CENPL    | -0.12487012  | 1.53740411 | -2.810816474 | 0.005323 | 0.00835 | -3.45294418 |
| PORCN    | -0.258096571 | 4.51441276 | -2.810808671 | 0.005323 | 0.00835 | -3.45296545 |
| TIGD2    | -0.191391222 | 3.38147307 | -2.810590412 | 0.005327 | 0.00836 | -3.45356036 |
| CHERP    | -0.189770845 | 4.48463401 | -2.810505808 | 0.005328 | 0.00836 | -3.45379095 |
| IRF4     | 0.457510213  | 1.66873033 | 2.809689808  | 0.005341 | 0.00838 | -3.45601466 |
| RBM25    | -0.225946281 | 4.63785252 | -2.808195687 | 0.005365 | 0.00842 | -3.46008476 |
| TMEM15   | -0.13656417  | 0.3841545  | -2.807993362 | 0.005369 | 0.00842 | -3.46063575 |
| MTMR3    | -0.16392842  | 2.22927543 | -2.807825659 | 0.005371 | 0.00843 | -3.46109243 |
| H2AFJ    | -0.225871604 | 5.60625223 | -2.807806365 | 0.005372 | 0.00843 | -3.46114497 |
| TRPC3    | -0.062205527 | 0.17335093 | -2.807691306 | 0.005374 | 0.00843 | -3.46145828 |
| IFNG     | 0.244776373  | 0.55040104 | 2.80726243   | 0.005381 | 0.00844 | -3.46262599 |
| HTRA3    | -0.514300999 | 3.41450847 | -2.807088448 | 0.005383 | 0.00844 | -3.46309966 |
| MYORG    | -0.214018856 | 2.02221998 | -2.807080776 | 0.005384 | 0.00844 | -3.46312054 |
| ZNF660   | -0.186076827 | 1.69012721 | -2.807003997 | 0.005385 | 0.00844 | -3.46332956 |
| SERPINE1 | 0.274296953  | 3.08253633 | 2.806037439  | 0.0054   | 0.00847 | -3.46596041 |
| TRABD2   | 0.291624795  | 1.54494413 | 2.805534914  | 0.005409 | 0.00848 | -3.46732788 |
| LDLRAD1  | -0.148774805 | 1.19253657 | -2.805235283 | 0.005414 | 0.00848 | -3.46814313 |
| GUCY2C   | -0.126968452 | 0.71119561 | -2.804468979 | 0.005426 | 0.0085  | -3.47022774 |
| UBTD1    | -0.185749123 | 5.78721302 | -2.803158202 | 0.005447 | 0.00854 | -3.47379227 |
| ZDHHC5   | -0.181072624 | 6.4122038  | -2.802330669 | 0.005461 | 0.00856 | -3.47604186 |
| TBC1D11  | -0.185622683 | 4.3084089  | -2.802306005 | 0.005461 | 0.00856 | -3.4761089  |
| ALG11    | -0.191541043 | 1.62688794 | -2.802136104 | 0.005464 | 0.00856 | -3.47657068 |
| DPP10    | -0.257018354 | 0.58548492 | -2.800996682 | 0.005483 | 0.00859 | -3.4796669  |
| PIP5K1C  | -0.151816328 | 5.19668852 | -2.799846634 | 0.005502 | 0.00862 | -3.48279078 |
| ADAMTS1  | 0.185691702  | 0.86083286 | 2.799078733  | 0.005515 | 0.00864 | -3.48487597 |
| PLIN3    | -0.221203906 | 6.12178322 | -2.798994851 | 0.005516 | 0.00864 | -3.48510371 |
| HEXB     | -0.201529336 | 6.41342669 | -2.798610593 | 0.005522 | 0.00865 | -3.4861469  |
| SMIM1    | -0.2973292   | 5.10957895 | -2.798310887 | 0.005527 | 0.00865 | -3.48696046 |
| WBP11    | -0.196749337 | 5.49988252 | -2.798099696 | 0.005531 | 0.00866 | -3.4875337  |
| CDCA4    | 0.185942815  | 3.81395505 | 2.797839081  | 0.005535 | 0.00866 | -3.48824103 |
| GPR12    | 0.062134419  | 0.06500147 | 2.796346734  | 0.00556  | 0.0087  | -3.49229017 |
| IRF8     | 0.372145769  | 2.0991919  | 2.79612689   | 0.005564 | 0.00871 | -3.49288649 |
| DDAH2    | -0.237040911 | 7.3539378  | -2.795741132 | 0.00557  | 0.00872 | -3.49393275 |
| THAP2    | -0.142500019 | 2.08119199 | -2.795069675 | 0.005581 | 0.00873 | -3.49575357 |

|         |              |            |              |          |         |             |
|---------|--------------|------------|--------------|----------|---------|-------------|
| MUC22   | 0.019999282  | 0.02439389 | 2.794207026  | 0.005596 | 0.00876 | -3.49809224 |
| ARL17A  | -0.089676718 | 0.49319339 | -2.793821796 | 0.005602 | 0.00876 | -3.49913639 |
| APBB1IP | 0.347353327  | 2.29749294 | 2.792892198  | 0.005618 | 0.00879 | -3.50165547 |
| SUPT6H  | -0.166281658 | 5.25257119 | -2.792860372 | 0.005619 | 0.00879 | -3.5017417  |
| HDGFL2  | -0.188911472 | 5.56450459 | -2.792393694 | 0.005626 | 0.0088  | -3.50300603 |
| CBLN4   | 0.421659587  | 1.49545258 | 2.792383754  | 0.005627 | 0.0088  | -3.50303295 |
| TMEM51  | 0.220864309  | 4.13916383 | 2.791910669  | 0.005635 | 0.00881 | -3.50431443 |
| TTC7B   | -0.162649083 | 1.73104482 | -2.791663666 | 0.005639 | 0.00882 | -3.50498342 |
| FBXL4   | -0.187451591 | 3.71257952 | -2.791242471 | 0.005646 | 0.00883 | -3.50612407 |
| SLC26A1 | -0.206254747 | 4.6368241  | -2.790585387 | 0.005657 | 0.00884 | -3.50790321 |
| SOCS6   | -0.205256949 | 3.66031239 | -2.788557101 | 0.005691 | 0.0089  | -3.51339258 |
| RAPGEF  | 0.286514167  | 3.18885464 | 2.78850347   | 0.005692 | 0.0089  | -3.51353768 |
| EZR     | -0.252932242 | 8.60628271 | -2.787132207 | 0.005716 | 0.00893 | -3.51724669 |
| P3H3    | 0.322937958  | 5.1063997  | 2.787093856  | 0.005716 | 0.00893 | -3.51735039 |
| EFNA4   | -0.237256929 | 4.71619897 | -2.786787702 | 0.005722 | 0.00894 | -3.51817824 |
| TRIM15  | 0.025779695  | 0.03793768 | 2.786072496  | 0.005734 | 0.00896 | -3.52011182 |
| ABCC4   | -0.367307449 | 2.08189029 | -2.7859117   | 0.005737 | 0.00896 | -3.52054648 |
| MPEG1   | 0.337561451  | 3.09411974 | 2.785299802  | 0.005747 | 0.00898 | -3.52220031 |
| STEAP3  | -0.27541432  | 4.03267993 | -2.785211075 | 0.005749 | 0.00898 | -3.52244009 |
| MADCAM  | -0.192397422 | 0.66882468 | -2.785129806 | 0.00575  | 0.00898 | -3.52265971 |
| SKIV2L  | -0.160130637 | 4.93946722 | -2.784887882 | 0.005754 | 0.00899 | -3.52331345 |
| UBAP1L  | -0.208143819 | 1.44443336 | -2.78477113  | 0.005756 | 0.00899 | -3.52362892 |
| MINAR1  | 0.084981503  | 0.53615124 | 2.784623866  | 0.005759 | 0.00899 | -3.52402683 |
| NRBP1   | -0.158866163 | 5.93198552 | -2.78356526  | 0.005777 | 0.00902 | -3.52688655 |
| HIST1H2 | -0.089944024 | 0.19494014 | -2.783441777 | 0.005779 | 0.00902 | -3.52722007 |
| HBA2    | -0.533198371 | 4.32906364 | -2.78264607  | 0.005793 | 0.00904 | -3.52936883 |
| P4HA3   | -0.246929134 | 1.88733523 | -2.782343159 | 0.005798 | 0.00905 | -3.53018668 |
| GRIN2A  | 0.151522427  | 0.46114165 | 2.782315385  | 0.005799 | 0.00905 | -3.53026166 |
| RHNO1   | -0.173320899 | 5.31950122 | -2.781514494 | 0.005813 | 0.00907 | -3.5324236  |
| MS4A4A  | 0.330896155  | 2.74433126 | 2.781208927  | 0.005818 | 0.00908 | -3.5332483  |
| TRIM59  | 0.181433744  | 1.53528662 | 2.780692239  | 0.005827 | 0.00909 | -3.53464261 |
| PLCG2   | -0.210159698 | 2.32222052 | -2.779615534 | 0.005846 | 0.00912 | -3.53754735 |
| ASTN2   | -0.199680656 | 1.2805579  | -2.77871671  | 0.005861 | 0.00914 | -3.5399714  |
| NHLRC2  | -0.186055362 | 3.62526434 | -2.778404313 | 0.005867 | 0.00915 | -3.54081373 |
| SMIM17  | 0.129493469  | 0.64140878 | 2.777389496  | 0.005885 | 0.00918 | -3.54354942 |
| NCKAP5  | -0.176707422 | 3.52424956 | -2.77691224  | 0.005893 | 0.00919 | -3.54483566 |
| PRRC2C  | 0.218386498  | 4.86546291 | 2.776862524  | 0.005894 | 0.00919 | -3.54496964 |
| MANEA   | -0.256260478 | 3.359788   | -2.776337278 | 0.005903 | 0.00921 | -3.54638495 |
| WFIKK   | -0.125753836 | 0.28207137 | -2.776076229 | 0.005908 | 0.00921 | -3.54708827 |
| PPEF1   | 0.143079829  | 0.51332422 | 2.776039923  | 0.005908 | 0.00921 | -3.54718608 |

|         |              |            |              |          |         |             |
|---------|--------------|------------|--------------|----------|---------|-------------|
| OR2B6   | -0.110579405 | 0.28127852 | -2.775645924 | 0.005915 | 0.00922 | -3.54824746 |
| SAMD9   | 0.285722383  | 2.64042545 | 2.775569906  | 0.005917 | 0.00922 | -3.54845223 |
| DNAJC2  | -0.173037909 | 1.94046249 | -2.775047314 | 0.005926 | 0.00924 | -3.54985977 |
| CCDC14  | 0.275071498  | 2.02303456 | 2.775033039  | 0.005926 | 0.00924 | -3.54989821 |
| CD19    | 0.374863075  | 0.72938176 | 2.77414969   | 0.005942 | 0.00926 | -3.55227683 |
| ADAMTS  | 0.221561454  | 1.06164337 | 2.77403155   | 0.005944 | 0.00926 | -3.5525949  |
| CD276   | 0.259937453  | 5.08669118 | 2.773757397  | 0.005949 | 0.00927 | -3.55333294 |
| CD320   | -0.235824593 | 6.59417132 | -2.772836102 | 0.005965 | 0.00929 | -3.55581265 |
| PYHIN1  | 0.251939621  | 0.78753112 | 2.772295684  | 0.005975 | 0.00931 | -3.55726685 |
| CLEC4E  | -0.311061853 | 1.44349837 | -2.772238334 | 0.005976 | 0.00931 | -3.55742116 |
| SLFN12  | -0.222658553 | 2.81018046 | -2.772087305 | 0.005979 | 0.00931 | -3.5578275  |
| NFKBID  | 0.23781367   | 2.63414434 | 2.77202725   | 0.00598  | 0.00931 | -3.55798908 |
| LAT     | 0.090987314  | 0.38034203 | 2.771747396  | 0.005985 | 0.00932 | -3.55874195 |
| TEPSIN  | -0.196012683 | 2.87656583 | -2.771189181 | 0.005995 | 0.00933 | -3.56024348 |
| EXOC1   | -0.164480232 | 4.50223439 | -2.770842137 | 0.006001 | 0.00934 | -3.56117685 |
| NLGN1   | -0.076811334 | 0.15139961 | -2.769726528 | 0.006021 | 0.00937 | -3.56417649 |
| PKN2    | -0.233866607 | 4.5052557  | -2.769368495 | 0.006027 | 0.00938 | -3.56513893 |
| DTX3L   | 0.216964258  | 5.07084241 | 2.767749897  | 0.006056 | 0.00943 | -3.56948845 |
| IFI27L2 | -0.295155054 | 4.92332397 | -2.767228273 | 0.006066 | 0.00944 | -3.57088966 |
| IFNAR1  | -0.182906647 | 5.5638516  | -2.767101706 | 0.006068 | 0.00944 | -3.57122961 |
| SCLY    | -0.083555879 | 0.71861644 | -2.765554073 | 0.006096 | 0.00949 | -3.57538528 |
| PRMT8   | 0.488918191  | 1.04578557 | 2.765476176  | 0.006097 | 0.00949 | -3.57559439 |
| XPNPEP  | 0.143055544  | 0.34505457 | 2.764744824  | 0.006111 | 0.00951 | -3.57755738 |
| HORMAL  | 0.053671843  | 0.15012053 | 2.763745528  | 0.006129 | 0.00953 | -3.58023877 |
| EDRF1   | -0.181148045 | 2.65637625 | -2.762978105 | 0.006143 | 0.00956 | -3.58229736 |
| ACADL   | -0.339521264 | 3.70412412 | -2.7625919   | 0.00615  | 0.00957 | -3.58333314 |
| CHKB-Cf | 0.196918724  | 1.06216809 | 2.761653405  | 0.006167 | 0.00959 | -3.58584955 |
| RAI14   | 0.275057341  | 3.59679606 | 2.761597778  | 0.006168 | 0.00959 | -3.58599868 |
| LRFN2   | -0.182285017 | 0.25403642 | -2.761517678 | 0.00617  | 0.00959 | -3.58621342 |
| ZDHHC1  | -0.156213421 | 2.77676521 | -2.759773001 | 0.006202 | 0.00964 | -3.59088912 |
| VPS53   | -0.151456935 | 3.20174442 | -2.759618507 | 0.006205 | 0.00965 | -3.59130303 |
| APBA1   | -0.17467913  | 1.0391073  | -2.759268828 | 0.006211 | 0.00965 | -3.59223978 |
| TRPV1   | 0.04684432   | 0.1414698  | 2.759225928  | 0.006212 | 0.00966 | -3.59235469 |
| DENND4  | -0.22054704  | 3.39917996 | -2.758478172 | 0.006226 | 0.00968 | -3.59435744 |
| ATP6V1A | -0.237444157 | 6.34707733 | -2.757998042 | 0.006234 | 0.00969 | -3.59564312 |
| HNRNPA  | -0.194908357 | 8.24618555 | -2.757545818 | 0.006243 | 0.0097  | -3.59685388 |
| IL13RA2 | -0.225546835 | 0.87690348 | -2.756926474 | 0.006254 | 0.00972 | -3.59851178 |
| SMYD5   | -0.151012738 | 4.88188498 | -2.756890062 | 0.006255 | 0.00972 | -3.59860924 |
| CCNT1   | -0.207540732 | 3.84364219 | -2.755783804 | 0.006276 | 0.00975 | -3.60156964 |
| MMP23B  | 0.044776105  | 0.10567757 | 2.754504058  | 0.006299 | 0.00979 | -3.60499289 |

|         |              |            |              |          |         |             |
|---------|--------------|------------|--------------|----------|---------|-------------|
| PROK1   | -0.158049775 | 0.39944343 | -2.754377099 | 0.006302 | 0.00979 | -3.60533242 |
| LDHC    | -0.214062061 | 0.38689673 | -2.754192899 | 0.006305 | 0.00979 | -3.605825   |
| APOD    | 0.576252608  | 3.57072954 | 2.754090724  | 0.006307 | 0.00979 | -3.60609822 |
| HRH4    | 0.034646354  | 0.08221065 | 2.753499375  | 0.006318 | 0.00981 | -3.60767932 |
| NLRC4   | 0.160324405  | 1.25005085 | 2.752794628  | 0.006331 | 0.00983 | -3.6095632  |
| NUP43   | -0.144425318 | 4.5430533  | -2.752748703 | 0.006332 | 0.00983 | -3.60968595 |
| DAGLA   | 0.222452205  | 2.14874407 | 2.752497545  | 0.006337 | 0.00984 | -3.6103572  |
| KLHL36  | -0.193847688 | 4.62897983 | -2.752132863 | 0.006344 | 0.00985 | -3.61133176 |
| PRDM4   | -0.190307939 | 4.39033623 | -2.751972868 | 0.006347 | 0.00985 | -3.61175929 |
| SCML4   | 0.137968739  | 0.33595745 | 2.751446493  | 0.006357 | 0.00987 | -3.61316566 |
| SENP5   | -0.144320344 | 3.70189662 | -2.750304441 | 0.006378 | 0.0099  | -3.61621614 |
| POU5F1  | -0.061855751 | 0.38759822 | -2.750089253 | 0.006382 | 0.0099  | -3.61679078 |
| FURIN   | -0.226268183 | 7.15060865 | -2.749532611 | 0.006393 | 0.00992 | -3.61827705 |
| ANKRD6  | 0.325860674  | 2.9251188  | 2.74910361   | 0.006401 | 0.00993 | -3.61942232 |
| NPB     | -0.018511527 | 0.03311966 | -2.749053742 | 0.006402 | 0.00993 | -3.61955544 |
| ZNF625  | -0.091647253 | 0.51814905 | -2.748701557 | 0.006409 | 0.00994 | -3.6204955  |
| FAM122C | -0.096132602 | 1.19712347 | -2.748116003 | 0.00642  | 0.00996 | -3.62205822 |
| LARP4   | -0.19832305  | 4.02926526 | -2.748096273 | 0.00642  | 0.00996 | -3.62211087 |
| CCL3L1  | -0.381927232 | 1.55759107 | -2.747826315 | 0.006425 | 0.00996 | -3.62283122 |
| SPARC   | -0.275827236 | 9.33515435 | -2.747602157 | 0.00643  | 0.00997 | -3.62342931 |
| TLR2    | 0.291793117  | 3.35365543 | 2.747539915  | 0.006431 | 0.00997 | -3.62359537 |
| SEC23A  | 0.253163437  | 4.03350913 | 2.747390295  | 0.006434 | 0.00997 | -3.62399454 |
| YTHDF3  | -0.210981122 | 4.92675442 | -2.746854475 | 0.006444 | 0.00999 | -3.6254239  |
| KCNH3   | -0.319695165 | 2.02094624 | -2.746657074 | 0.006448 | 0.00999 | -3.62595043 |
| TTC31   | -0.157136522 | 3.74981112 | -2.746595587 | 0.006449 | 0.00999 | -3.62611442 |
| OPN5    | 0.022752742  | 0.05007645 | 2.746111743  | 0.006458 | 0.01001 | -3.62740479 |
| KCNMB1  | 0.172512783  | 1.24785233 | 2.746075838  | 0.006459 | 0.01001 | -3.62750054 |
| GIMAP2  | -0.276552868 | 3.00733556 | -2.745965458 | 0.006461 | 0.01001 | -3.62779488 |
| KRT1    | 0.078873822  | 0.14146224 | 2.745485928  | 0.00647  | 0.01002 | -3.62907346 |
| KIAA114 | -0.181479755 | 4.19286063 | -2.745200981 | 0.006475 | 0.01003 | -3.62983313 |
| STEAP2  | -0.293875635 | 1.62696492 | -2.74494423  | 0.00648  | 0.01004 | -3.63051756 |
| USP9X   | -0.227424796 | 4.98560136 | -2.744748819 | 0.006484 | 0.01004 | -3.63103843 |
| STAU2   | -0.172674317 | 3.49673602 | -2.743977924 | 0.006499 | 0.01006 | -3.63309293 |
| ZNF251  | -0.219525563 | 4.12348121 | -2.742795279 | 0.006522 | 0.0101  | -3.63624372 |
| PDPN    | 0.320508037  | 1.49267885 | 2.742592958  | 0.006526 | 0.0101  | -3.63678262 |
| POLRMT  | -0.14868782  | 4.80401013 | -2.742543464 | 0.006527 | 0.0101  | -3.63691444 |
| RPRD2   | -0.233565205 | 5.05246546 | -2.741757221 | 0.006542 | 0.01013 | -3.63900825 |
| KIAA132 | -0.135148587 | 1.49533213 | -2.740600296 | 0.006564 | 0.01016 | -3.64208818 |
| CASP6   | -0.179375865 | 4.5470587  | -2.739411419 | 0.006587 | 0.0102  | -3.6452519  |
| SNX8    | 0.183300176  | 4.63395825 | 2.739291756  | 0.00659  | 0.0102  | -3.64557026 |

|         |              |            |              |          |         |             |
|---------|--------------|------------|--------------|----------|---------|-------------|
| TRIM31  | -0.122711276 | 0.47387582 | -2.738744078 | 0.0066   | 0.01021 | -3.64702719 |
| NRP1    | -0.267129503 | 4.82177016 | -2.738608682 | 0.006603 | 0.01022 | -3.64738733 |
| DENND5  | -0.228780016 | 2.01575554 | -2.737723119 | 0.00662  | 0.01024 | -3.6497424  |
| HDAC10  | -0.174856715 | 2.11367096 | -2.737631026 | 0.006622 | 0.01024 | -3.64998728 |
| ATXN1L  | -0.245217899 | 4.04924222 | -2.737606853 | 0.006622 | 0.01024 | -3.65005155 |
| PRR7    | -0.271420925 | 2.11552877 | -2.737468907 | 0.006625 | 0.01025 | -3.65041833 |
| CBX2    | -0.170932669 | 1.56217643 | -2.737392029 | 0.006627 | 0.01025 | -3.65062272 |
| CA5B    | -0.184127798 | 2.21285697 | -2.737141785 | 0.006632 | 0.01026 | -3.65128802 |
| SERPINE | -0.037870894 | 0.1522161  | -2.737004739 | 0.006634 | 0.01026 | -3.65165234 |
| 7-Mar   | -0.205613151 | 5.21627293 | -2.73679338  | 0.006638 | 0.01026 | -3.65221419 |
| PEAK1   | 0.206334782  | 2.32388374 | 2.736444176  | 0.006645 | 0.01027 | -3.65314237 |
| NAAA    | -0.227288823 | 3.62931067 | -2.736225631 | 0.00665  | 0.01028 | -3.6537232  |
| TMEM68  | -0.15001029  | 3.08190704 | -2.735600549 | 0.006662 | 0.0103  | -3.65538427 |
| EPSTI1  | 0.339030113  | 2.88909463 | 2.735084982  | 0.006672 | 0.01031 | -3.65675404 |
| NHLRC3  | -0.194639871 | 4.12258448 | -2.734398005 | 0.006685 | 0.01033 | -3.65857884 |
| RAMP1   | 0.602703967  | 3.24538902 | 2.734024575  | 0.006693 | 0.01034 | -3.65957059 |
| NSMF    | -0.254397014 | 4.5704308  | -2.733928733 | 0.006695 | 0.01035 | -3.6598251  |
| HAS2    | 0.408266767  | 1.19532471 | 2.732870019  | 0.006716 | 0.01038 | -3.66263604 |
| FCRL1   | 0.179300818  | 0.24988375 | 2.732544589  | 0.006722 | 0.01039 | -3.66349986 |
| MLKL    | -0.178003717 | 2.34996614 | -2.73198013  | 0.006733 | 0.0104  | -3.66499794 |
| FEM1A   | -0.09895191  | 0.84390652 | -2.731837299 | 0.006736 | 0.01041 | -3.66537697 |
| KLF13   | -0.267219732 | 5.29852023 | -2.731808301 | 0.006737 | 0.01041 | -3.66545392 |
| TBC1D8I | -0.218981737 | 2.52861037 | -2.731731888 | 0.006738 | 0.01041 | -3.66565668 |
| SLC16A5 | -0.385650007 | 5.11119777 | -2.731129744 | 0.00675  | 0.01042 | -3.66725432 |
| TMED7-1 | -0.049612499 | 0.24887246 | -2.73092272  | 0.006754 | 0.01043 | -3.66780352 |
| ZNF10   | -0.232707943 | 3.67964921 | -2.728731299 | 0.006798 | 0.0105  | -3.67361467 |
| PRPF40A | -0.203007795 | 4.839606   | -2.72782758  | 0.006816 | 0.01052 | -3.67600985 |
| MYO1D   | 0.310140765  | 6.32360308 | 2.727194077  | 0.006829 | 0.01054 | -3.67768841 |
| MOB3A   | -0.168550642 | 5.11846892 | -2.726624833 | 0.00684  | 0.01056 | -3.67919639 |
| GRK3    | -0.207359794 | 2.91381908 | -2.725945667 | 0.006854 | 0.01058 | -3.68099518 |
| CLDN2   | 0.568986722  | 2.45235115 | 2.725719428  | 0.006859 | 0.01058 | -3.68159429 |
| SLC35A3 | -0.2522209   | 4.38169022 | -2.72474521  | 0.006878 | 0.01061 | -3.68417359 |
| TUSC3   | 0.502235981  | 4.78745235 | 2.724322187  | 0.006887 | 0.01063 | -3.6852933  |
| NFIL3   | -0.328400865 | 4.50040166 | -2.723573164 | 0.006902 | 0.01065 | -3.6872755  |
| CHAF1B  | 0.199084718  | 2.26902546 | 2.723132826  | 0.006911 | 0.01066 | -3.68844057 |
| MYO3A   | 0.158319683  | 0.83195214 | 2.722947451  | 0.006915 | 0.01067 | -3.68893098 |
| ZNF468  | -0.254301352 | 3.46326959 | -2.722945678 | 0.006915 | 0.01067 | -3.68893568 |
| DHX8    | -0.171251807 | 4.06821696 | -2.722203178 | 0.00693  | 0.01069 | -3.69089968 |
| SEC24D  | -0.28626211  | 4.28573692 | -2.721706644 | 0.00694  | 0.0107  | -3.69221279 |
| SYN2    | -0.136441655 | 0.24142893 | -2.72133365  | 0.006948 | 0.01071 | -3.69319905 |

|         |              |            |              |          |         |             |
|---------|--------------|------------|--------------|----------|---------|-------------|
| GPRC5A  | 0.270262816  | 7.05552887 | 2.720503627  | 0.006965 | 0.01074 | -3.69539331 |
| KCNMA1  | 0.162951184  | 0.8107125  | 2.720376487  | 0.006967 | 0.01074 | -3.69572936 |
| TIMM29  | -0.140250348 | 4.57931753 | -2.720196832 | 0.006971 | 0.01075 | -3.69620419 |
| CNTNAP  | -0.257844243 | 0.42071609 | -2.719249384 | 0.00699  | 0.01078 | -3.69870783 |
| C3AR1   | 0.368590267  | 3.22174448 | 2.717044166  | 0.007036 | 0.01084 | -3.70453196 |
| KLHL42  | -0.200489631 | 3.44535304 | -2.716995462 | 0.007037 | 0.01085 | -3.70466054 |
| CD83    | -0.265668239 | 4.54112085 | -2.716705744 | 0.007043 | 0.01085 | -3.70542536 |
| C7      | 0.680975445  | 3.06143361 | 2.716483889  | 0.007047 | 0.01086 | -3.70601098 |
| DSE     | 0.197838824  | 2.05291032 | 2.716267767  | 0.007052 | 0.01087 | -3.70658142 |
| SLCO3A  | -0.172146337 | 3.94043096 | -2.715838959 | 0.007061 | 0.01088 | -3.70771311 |
| AMPH    | 0.096053569  | 0.36229106 | 2.715379866  | 0.00707  | 0.01089 | -3.70892453 |
| IGLL1   | 0.230390486  | 0.38877313 | 2.714704952  | 0.007084 | 0.01091 | -3.7107051  |
| SMG5    | -0.173467408 | 5.9606553  | -2.712961433 | 0.007121 | 0.01097 | -3.71530296 |
| FMNL2   | 0.327874525  | 5.34979898 | 2.712626651  | 0.007128 | 0.01098 | -3.71618549 |
| SERPINE | 0.284355193  | 3.47488175 | 2.712221973  | 0.007136 | 0.01099 | -3.71725215 |
| IFNGR2  | -0.19294578  | 6.86651431 | -2.71174241  | 0.007146 | 0.011   | -3.718516   |
| MYH14   | 0.227601554  | 6.67170643 | 2.711599097  | 0.007149 | 0.01101 | -3.71889365 |
| DRD4    | -0.225082379 | 1.20697522 | -2.710866407 | 0.007164 | 0.01103 | -3.72082408 |
| ZNF410  | -0.098502566 | 0.93246136 | -2.710149206 | 0.007179 | 0.01105 | -3.72271323 |
| FCGR3A  | 0.427467885  | 4.45940724 | 2.709648171  | 0.00719  | 0.01107 | -3.72403271 |
| FBXO17  | -0.145061921 | 0.80514044 | -2.708585575 | 0.007212 | 0.0111  | -3.7268303  |
| LY6G6F- | -0.07367765  | 0.12078965 | -2.708131045 | 0.007222 | 0.01111 | -3.72802666 |
| PHF10   | -0.190452993 | 5.49498517 | -2.707834449 | 0.007228 | 0.01112 | -3.72880722 |
| RAD18   | 0.172679968  | 2.74169169 | 2.707674327  | 0.007232 | 0.01113 | -3.72922859 |
| CEMIP   | 0.3536595    | 1.68545339 | 2.707421781  | 0.007237 | 0.01113 | -3.72989312 |
| SSH2    | -0.183400252 | 3.03256073 | -2.707226449 | 0.007241 | 0.01114 | -3.73040707 |
| HES7    | -0.17240167  | 0.63323268 | -2.707113477 | 0.007244 | 0.01114 | -3.7307043  |
| CERKL   | 0.279679544  | 1.663886   | 2.706891021  | 0.007248 | 0.01115 | -3.73128955 |
| FBLN2   | 0.402352162  | 4.26662975 | 2.706865958  | 0.007249 | 0.01115 | -3.73135548 |
| PHACTR  | -0.252668859 | 3.90423761 | -2.705370934 | 0.007281 | 0.0112  | -3.73528744 |
| IRF1    | 0.295731791  | 3.87840614 | 2.705300216  | 0.007282 | 0.0112  | -3.73547338 |
| ZFAND5  | -0.196154753 | 6.26047705 | -2.704837478 | 0.007292 | 0.01121 | -3.73668995 |
| RNF217  | -0.206461456 | 2.80719888 | -2.704161693 | 0.007306 | 0.01123 | -3.73846629 |
| GPHN    | -0.210175506 | 3.76822867 | -2.703109497 | 0.007329 | 0.01127 | -3.7412312  |
| MEFV    | 0.071304041  | 0.2701779  | 2.702171184  | 0.007349 | 0.0113  | -3.743696   |
| RXRG    | 0.799922693  | 5.5475222  | 2.700595388  | 0.007383 | 0.01135 | -3.74783354 |
| SESN3   | -0.300885518 | 4.25331015 | -2.700422945 | 0.007387 | 0.01135 | -3.74828619 |
| PURG    | -0.033379437 | 0.11662153 | -2.699132911 | 0.007415 | 0.01139 | -3.75167151 |
| CUZD1   | 0.116299204  | 0.76878091 | 2.698887946  | 0.00742  | 0.0114  | -3.75231418 |
| FOXD2   | -0.090291611 | 0.59157457 | -2.698227356 | 0.007434 | 0.01142 | -3.75404697 |



|          |              |            |              |          |         |             |
|----------|--------------|------------|--------------|----------|---------|-------------|
| CYB5R2   | -0.159188596 | 1.65710175 | -2.697488078 | 0.00745  | 0.01145 | -3.75598569 |
| ST8SIA5  | -0.101144352 | 0.15359538 | -2.697428356 | 0.007452 | 0.01145 | -3.75614228 |
| BBS1     | -0.133101215 | 1.36426429 | -2.697402363 | 0.007452 | 0.01145 | -3.75621044 |
| GPR137I  | -0.224097239 | 5.07482267 | -2.697302199 | 0.007454 | 0.01145 | -3.75647307 |
| CYP2U1   | -0.198080823 | 2.16875925 | -2.696962414 | 0.007462 | 0.01146 | -3.75736391 |
| ZNF865   | -0.157155843 | 4.38718208 | -2.696945051 | 0.007462 | 0.01146 | -3.75740943 |
| SERTAD   | 0.245360254  | 4.56961113 | 2.696766034  | 0.007466 | 0.01146 | -3.75787873 |
| RNASE6   | 0.389379424  | 3.84769232 | 2.696566673  | 0.00747  | 0.01147 | -3.75840132 |
| LYSMD4   | -0.137987565 | 2.08740233 | -2.695665759 | 0.00749  | 0.0115  | -3.76076249 |
| RNASE1   | -0.056848795 | 0.15169784 | -2.694550096 | 0.007514 | 0.01154 | -3.76368544 |
| METTL1   | -0.173016745 | 4.12474166 | -2.693788883 | 0.007531 | 0.01156 | -3.7656791  |
| CCM2     | 0.181504868  | 4.5201727  | 2.693580424  | 0.007536 | 0.01157 | -3.76622498 |
| ADGRB2   | -0.313941577 | 3.15528853 | -2.693372545 | 0.00754  | 0.01157 | -3.7667693  |
| PPIL3    | -0.20764799  | 4.28458248 | -2.692460273 | 0.00756  | 0.0116  | -3.76915754 |
| SAMD3    | 0.116554843  | 0.37971823 | 2.692212848  | 0.007566 | 0.01161 | -3.76980515 |
| KLHL35   | -0.167242696 | 1.00015622 | -2.691193837 | 0.007588 | 0.01164 | -3.77247169 |
| NET1     | 0.291648337  | 5.48654843 | 2.690987372  | 0.007593 | 0.01165 | -3.77301186 |
| GATA3    | 0.352745499  | 3.20033934 | 2.690718885  | 0.007599 | 0.01166 | -3.77371422 |
| ORAI3    | -0.189374912 | 5.08370832 | -2.689911719 | 0.007617 | 0.01168 | -3.77582539 |
| TRPA1    | 0.016992109  | 0.02304478 | 2.689452423  | 0.007627 | 0.0117  | -3.77702642 |
| AP1S3    | -0.275412443 | 3.25431495 | -2.688936575 | 0.007638 | 0.01171 | -3.7783751  |
| CARD19   | -0.171537163 | 4.38761508 | -2.687664287 | 0.007667 | 0.01176 | -3.78170044 |
| PDGFRB   | -0.338090783 | 4.93338342 | -2.686470399 | 0.007693 | 0.0118  | -3.78481953 |
| UBE2H    | -0.183200576 | 6.33970146 | -2.685778315 | 0.007709 | 0.01182 | -3.78662702 |
| SLC22A10 | 0.033707503  | 0.05932335 | 2.685689528  | 0.007711 | 0.01182 | -3.78685887 |
| FMN2     | -0.16497381  | 0.24382558 | -2.685668109 | 0.007711 | 0.01182 | -3.7869148  |
| ZNF534   | -0.128431428 | 0.31996879 | -2.685222854 | 0.007721 | 0.01183 | -3.78807739 |
| AGAP1    | -0.223570983 | 3.33714869 | -2.684690957 | 0.007733 | 0.01185 | -3.78946596 |
| CES1     | -0.571523814 | 2.44616283 | -2.683048714 | 0.00777  | 0.01191 | -3.79375156 |
| CFAP10C  | -0.040625495 | 0.08572197 | -2.682913568 | 0.007773 | 0.01191 | -3.79410413 |
| PLA2G4F  | -0.032488378 | 0.02634344 | -2.682759691 | 0.007777 | 0.01192 | -3.79450554 |
| PM20D1   | -0.180947313 | 0.51028045 | -2.682523942 | 0.007782 | 0.01192 | -3.79512048 |
| DNAH3    | -0.020646459 | 0.04571536 | -2.681500368 | 0.007805 | 0.01196 | -3.79778986 |
| PLXNB1   | 0.237050375  | 5.7599551  | 2.681395577  | 0.007808 | 0.01196 | -3.79806309 |
| FAM118A  | -0.234546687 | 2.89806119 | -2.68027548  | 0.007833 | 0.012   | -3.80098297 |
| CPB2     | -0.125695694 | 0.32396295 | -2.680172848 | 0.007835 | 0.012   | -3.80125045 |
| IL10RA   | 0.318053922  | 2.83143866 | 2.679692156  | 0.007846 | 0.01202 | -3.80250313 |
| RADX     | -0.17931094  | 1.62265958 | -2.679382938 | 0.007853 | 0.01203 | -3.80330883 |
| CLEC4G   | 0.099280513  | 0.23642847 | 2.678277305  | 0.007879 | 0.01206 | -3.80618897 |
| PPM1M    | -0.205260372 | 4.5549086  | -2.676555327 | 0.007918 | 0.01212 | -3.81067244 |

|          |              |            |              |          |         |             |
|----------|--------------|------------|--------------|----------|---------|-------------|
| CEP162   | -0.171649653 | 2.81307329 | -2.675709926 | 0.007938 | 0.01215 | -3.81287259 |
| FAM122E  | -0.187039106 | 4.64948303 | -2.675635626 | 0.007939 | 0.01215 | -3.81306592 |
| RELN     | -0.146109352 | 0.29441444 | -2.675582325 | 0.007941 | 0.01215 | -3.81320461 |
| ARG1     | -0.063415231 | 0.32632126 | -2.674851443 | 0.007957 | 0.01218 | -3.81510611 |
| TBC1D1C  | -0.214300119 | 3.53097441 | -2.674707812 | 0.007961 | 0.01218 | -3.81547973 |
| XRCC2    | 0.113069099  | 0.77466748 | 2.674456973  | 0.007967 | 0.01219 | -3.81613218 |
| TTBK2    | -0.141272528 | 2.085291   | -2.674228789 | 0.007972 | 0.0122  | -3.81672565 |
| BST2     | -0.383041813 | 6.08933095 | -2.67421501  | 0.007972 | 0.0122  | -3.81676148 |
| NOP9     | -0.178953336 | 4.32217865 | -2.674120784 | 0.007974 | 0.0122  | -3.81700654 |
| ZNF195   | -0.14816422  | 3.44531521 | -2.673913645 | 0.007979 | 0.0122  | -3.81754521 |
| TUBA3E   | -0.083224796 | 0.10828434 | -2.673105088 | 0.007998 | 0.01223 | -3.81964752 |
| GAREM1   | -0.256608595 | 1.97066139 | -2.672840459 | 0.008004 | 0.01224 | -3.82033545 |
| IDH1     | -0.235839695 | 5.46441424 | -2.672427369 | 0.008014 | 0.01225 | -3.82140918 |
| LMBRD1   | -0.245508826 | 7.33491692 | -2.672425111 | 0.008014 | 0.01225 | -3.82141505 |
| ZNF143   | -0.165501054 | 3.11667835 | -2.672342907 | 0.008016 | 0.01225 | -3.8216287  |
| FUT7     | 0.215053669  | 0.77659209 | 2.671197982  | 0.008042 | 0.01229 | -3.82460376 |
| SLC11A2  | -0.199858028 | 4.99596439 | -2.671018351 | 0.008046 | 0.0123  | -3.82507042 |
| MYB      | 0.133306321  | 0.6074817  | 2.671011716  | 0.008046 | 0.0123  | -3.82508766 |
| LPO      | -0.083236621 | 0.08968406 | -2.670749734 | 0.008053 | 0.01231 | -3.8257682  |
| S100A13  | -0.262529242 | 8.19073429 | -2.670260932 | 0.008064 | 0.01232 | -3.82703777 |
| GPR173   | 0.301803208  | 1.54758576 | 2.669722321  | 0.008077 | 0.01234 | -3.82843646 |
| USP1     | -0.22468625  | 4.67218152 | -2.669312068 | 0.008086 | 0.01235 | -3.82950164 |
| B3GNT2   | -0.211605021 | 5.14101019 | -2.669081286 | 0.008092 | 0.01236 | -3.83010078 |
| PPP1R2I  | -0.087084698 | 0.35933895 | -2.66879075  | 0.008098 | 0.01237 | -3.83085498 |
| ZNF318   | -0.219979025 | 3.51154791 | -2.668459225 | 0.008106 | 0.01238 | -3.83171548 |
| ANKRD2   | -0.03193434  | 0.07652076 | -2.667782375 | 0.008122 | 0.01241 | -3.83347199 |
| SCAMP1   | -0.213732154 | 5.38616837 | -2.66730566  | 0.008133 | 0.01242 | -3.83470887 |
| POLD1    | 0.193015232  | 4.00824546 | 2.665990265  | 0.008164 | 0.01247 | -3.8381207  |
| SLC16A10 | 0.41517965   | 2.03238934 | 2.665758865  | 0.00817  | 0.01247 | -3.83872073 |
| AMDHD2   | -0.172395994 | 3.51069448 | -2.665756845 | 0.00817  | 0.01247 | -3.83872597 |
| GMEB1    | -0.162569991 | 3.19421379 | -2.665138812 | 0.008184 | 0.01249 | -3.84032832 |
| RALA     | -0.149840639 | 5.09822464 | -2.664394962 | 0.008202 | 0.01252 | -3.84225641 |
| CSRNP3   | -0.272211403 | 1.95954554 | -2.663720141 | 0.008218 | 0.01254 | -3.84400513 |
| ASPM     | 0.133805329  | 0.52099673 | 2.663562729  | 0.008222 | 0.01255 | -3.84441298 |
| COL22A1  | 0.13278974   | 0.52514666 | 2.662387467  | 0.00825  | 0.01259 | -3.84745737 |
| PNPLA7   | -0.230921789 | 3.13207374 | -2.662052061 | 0.008258 | 0.0126  | -3.84832597 |
| CYFIP1   | -0.194140021 | 5.14052852 | -2.661494557 | 0.008271 | 0.01262 | -3.8497695  |
| SPDEF    | 0.117246069  | 0.34262012 | 2.661269743  | 0.008276 | 0.01263 | -3.85035153 |
| FERMT2   | -0.21421603  | 4.31294878 | -2.661251183 | 0.008277 | 0.01263 | -3.85039958 |
| ASGR2    | 0.12207275   | 0.48285759 | 2.660438223  | 0.008296 | 0.01266 | -3.85250386 |

|         |              |            |              |          |         |             |
|---------|--------------|------------|--------------|----------|---------|-------------|
| PPP1R3  | -0.16629514  | 1.84754071 | -2.659926052 | 0.008309 | 0.01267 | -3.85382927 |
| CHRNA9  | -0.158902389 | 0.36180303 | -2.659158208 | 0.008327 | 0.0127  | -3.85581586 |
| RO60    | -0.233085023 | 3.26119274 | -2.65851445  | 0.008343 | 0.01272 | -3.85748099 |
| ACIN1   | -0.180427635 | 5.89094818 | -2.657407905 | 0.008369 | 0.01276 | -3.86034227 |
| MTUS2   | -0.247497397 | 0.64707848 | -2.657042626 | 0.008378 | 0.01277 | -3.86128655 |
| TNFRSF  | 0.487826695  | 1.17570361 | 2.656786556  | 0.008384 | 0.01278 | -3.86194844 |
| LAMA3   | 0.190045823  | 0.72214134 | 2.656010654  | 0.008403 | 0.01281 | -3.86395363 |
| CXCR3   | 0.368217461  | 2.22540035 | 2.652726867  | 0.008483 | 0.01293 | -3.87243391 |
| NAA25   | -0.173033165 | 2.75855401 | -2.652645926 | 0.008485 | 0.01293 | -3.87264281 |
| RSPO3   | 0.206246997  | 0.72910568 | 2.651395021  | 0.008516 | 0.01298 | -3.87587053 |
| PIP4K2A | 0.207440273  | 4.38677928 | 2.65134058   | 0.008517 | 0.01298 | -3.87601097 |
| SSTR3   | 0.306688418  | 1.09403119 | 2.651286098  | 0.008518 | 0.01298 | -3.87615151 |
| TUBGCP  | -0.167186463 | 3.47481099 | -2.651077221 | 0.008523 | 0.01299 | -3.87669032 |
| TKTL1   | -0.025867105 | 0.05714105 | -2.650932554 | 0.008527 | 0.01299 | -3.87706347 |
| RFX5    | -0.198301292 | 5.26690904 | -2.650789071 | 0.00853  | 0.01299 | -3.87743354 |
| HPDL    | -0.313421143 | 1.46997963 | -2.650491962 | 0.008538 | 0.013   | -3.8781998  |
| GDPD5   | -0.140266977 | 1.28531801 | -2.650231477 | 0.008544 | 0.01301 | -3.87887153 |
| ATL1    | -0.191968198 | 1.93432626 | -2.648797808 | 0.00858  | 0.01307 | -3.88256753 |
| CAP1    | -0.17972704  | 7.84188314 | -2.648606344 | 0.008584 | 0.01307 | -3.88306098 |
| NMT2    | -0.153453877 | 2.86852598 | -2.648401702 | 0.008589 | 0.01308 | -3.88358836 |
| SOD2    | 0.2597603    | 4.8093965  | 2.647830896  | 0.008603 | 0.0131  | -3.88505916 |
| KRT4    | -0.084075595 | 0.10399125 | -2.647601163 | 0.008609 | 0.01311 | -3.88565103 |
| WDR36   | -0.183874079 | 3.62692233 | -2.647446588 | 0.008613 | 0.01311 | -3.88604924 |
| ACER2   | 0.36754252   | 2.33592295 | 2.646623419  | 0.008633 | 0.01314 | -3.88816949 |
| SCN11A  | -0.044210503 | 0.16846191 | -2.645756208 | 0.008655 | 0.01317 | -3.8904025  |
| CCN2    | -0.514947686 | 8.23087793 | -2.645749802 | 0.008655 | 0.01317 | -3.89041899 |
| CEBPB   | -0.202988104 | 6.43050906 | -2.645690323 | 0.008657 | 0.01317 | -3.89057212 |
| GRM7    | 0.02394503   | 0.03859594 | 2.645429388  | 0.008663 | 0.01318 | -3.89124386 |
| ISL2    | 0.063260571  | 0.09255828 | 2.64538551   | 0.008664 | 0.01318 | -3.89135681 |
| WARS    | 0.382986212  | 7.11147768 | 2.645268008  | 0.008667 | 0.01319 | -3.89165928 |
| EIF4G1  | -0.199290196 | 6.90743969 | -2.645074637 | 0.008672 | 0.01319 | -3.89215702 |
| TUBGCP  | -0.146355389 | 2.20108322 | -2.644578391 | 0.008684 | 0.01321 | -3.8934342  |
| ITPRID2 | -0.260029553 | 5.29693005 | -2.644456019 | 0.008687 | 0.01321 | -3.89374911 |
| PHF6    | -0.194117472 | 3.6288834  | -2.644111404 | 0.008696 | 0.01322 | -3.89463586 |
| DERA    | -0.176572417 | 5.52060442 | -2.642109014 | 0.008746 | 0.0133  | -3.89978621 |
| BARX1   | -0.321027724 | 0.72872519 | -2.64089695  | 0.008777 | 0.01334 | -3.90290196 |
| UBE3C   | -0.208037128 | 4.26161014 | -2.640776781 | 0.00878  | 0.01335 | -3.9032108  |
| SENP1   | -0.166232082 | 3.06581892 | -2.64019675  | 0.008794 | 0.01337 | -3.90470129 |
| KIAA167 | -0.300391641 | 4.35430958 | -2.639450056 | 0.008813 | 0.0134  | -3.9066196  |
| ZSCAN2  | -0.161746841 | 2.26439196 | -2.639297925 | 0.008817 | 0.0134  | -3.90701038 |

|         |              |            |              |          |         |             |
|---------|--------------|------------|--------------|----------|---------|-------------|
| CLSPN   | 0.150939795  | 0.75392188 | 2.637814464  | 0.008855 | 0.01346 | -3.91081976 |
| CAPN9   | -0.200020671 | 0.39502585 | -2.636776211 | 0.008881 | 0.0135  | -3.91348469 |
| AVPI1   | 0.219407415  | 4.99331703 | 2.634450128  | 0.008941 | 0.01359 | -3.91945153 |
| HTR4    | 0.023786883  | 0.03429366 | 2.634179884  | 0.008947 | 0.01359 | -3.92014444 |
| HMGXB3  | 0.1577143    | 4.76821751 | 2.634081269  | 0.00895  | 0.0136  | -3.92039727 |
| FBXL18  | -0.16861844  | 1.5823686  | -2.634052201 | 0.008951 | 0.0136  | -3.92047179 |
| ABI2    | -0.216245265 | 3.76298538 | -2.633627452 | 0.008962 | 0.01361 | -3.92156066 |
| ARL17B  | -0.114231481 | 0.5807835  | -2.632943832 | 0.008979 | 0.01364 | -3.92331281 |
| TNRC6B  | -0.183098871 | 2.95381587 | -2.632478424 | 0.008991 | 0.01366 | -3.92450543 |
| DRD2    | 0.036679676  | 0.06081255 | 2.632334114  | 0.008995 | 0.01366 | -3.92487518 |
| TARBP1  | -0.201103638 | 3.53526338 | -2.632257306 | 0.008997 | 0.01366 | -3.92507197 |
| RAB7B   | 0.363766728  | 3.41207502 | 2.63153604   | 0.009015 | 0.01369 | -3.92691969 |
| MEGF11  | -0.220711355 | 0.30429935 | -2.631279741 | 0.009022 | 0.0137  | -3.92757615 |
| FAM163E | 0.09221182   | 0.18154715 | 2.631279257  | 0.009022 | 0.0137  | -3.92757739 |
| GPR19   | 0.096039482  | 0.46827352 | 2.63103376   | 0.009028 | 0.0137  | -3.92820613 |
| IGFBP3  | -0.456394821 | 5.5522048  | -2.630909914 | 0.009032 | 0.01371 | -3.92852329 |
| GLRX    | -0.217950935 | 3.07984101 | -2.630735195 | 0.009036 | 0.01371 | -3.9289707  |
| TRIP12  | -0.211485332 | 5.31199019 | -2.629844535 | 0.009059 | 0.01375 | -3.93125105 |
| ARHGAP  | 0.238907705  | 3.95777279 | 2.629225393  | 0.009075 | 0.01377 | -3.9328358  |
| MRVI1   | -0.221669818 | 2.26321794 | -2.629139326 | 0.009078 | 0.01377 | -3.93305606 |
| MYO18A  | -0.241531169 | 3.45614553 | -2.628409849 | 0.009097 | 0.0138  | -3.93492271 |
| CMTM5   | -0.033771594 | 0.0867703  | -2.627712486 | 0.009115 | 0.01383 | -3.93670672 |
| IFI44   | -0.268987703 | 4.596022   | -2.627190983 | 0.009128 | 0.01385 | -3.93804056 |
| PKD2L2  | -0.035246159 | 0.14857798 | -2.626897371 | 0.009136 | 0.01386 | -3.93879141 |
| PRPF8   | -0.197184473 | 6.31696529 | -2.626721232 | 0.009141 | 0.01386 | -3.93924181 |
| SELP    | 0.353313012  | 2.92454467 | 2.626458286  | 0.009147 | 0.01387 | -3.93991413 |
| IZUMO1F | -0.119566373 | 0.31024469 | -2.626409263 | 0.009149 | 0.01387 | -3.94003947 |
| CAMK4   | 0.112106455  | 0.40080687 | 2.625988618  | 0.00916  | 0.01389 | -3.94111485 |
| C5orf24 | -0.227393171 | 5.19218098 | -2.622459843 | 0.009253 | 0.01403 | -3.95012978 |
| LRRC69  | -0.138804401 | 0.75953048 | -2.620900172 | 0.009294 | 0.01409 | -3.95411059 |
| MTOR    | -0.191549437 | 3.95468085 | -2.62058036  | 0.009302 | 0.0141  | -3.95492659 |
| TIGAR   | -0.213693361 | 3.11542597 | -2.620336349 | 0.009309 | 0.01411 | -3.95554911 |
| GABRB1  | -0.058272045 | 0.10384959 | -2.620165646 | 0.009313 | 0.01411 | -3.95598458 |
| KIF14   | 0.086453902  | 0.3295118  | 2.618607603  | 0.009355 | 0.01418 | -3.95995794 |
| GLIPR1  | 0.227366113  | 2.52798089 | 2.618323662  | 0.009362 | 0.01419 | -3.96068182 |
| CST4    | 0.533594156  | 1.63922263 | 2.618062644  | 0.009369 | 0.0142  | -3.96134718 |
| KCNIP1  | -0.150888453 | 0.22347154 | -2.616887737 | 0.009401 | 0.01424 | -3.96434139 |
| MYO3B   | 0.215548157  | 2.00743184 | 2.616688407  | 0.009406 | 0.01425 | -3.96484925 |
| ADGRG5  | 0.25039871   | 1.11220269 | 2.616345067  | 0.009415 | 0.01426 | -3.96572394 |
| ZBTB37  | -0.156825337 | 1.81356664 | -2.616293615 | 0.009417 | 0.01426 | -3.96585501 |

|          |              |            |              |          |         |             |
|----------|--------------|------------|--------------|----------|---------|-------------|
| TPRN     | -0.164263742 | 3.31280925 | -2.61625904  | 0.009418 | 0.01426 | -3.96594308 |
| PAK5     | -0.035445296 | 0.07027906 | -2.615804274 | 0.00943  | 0.01428 | -3.96710143 |
| PFN4     | -0.161566068 | 1.9947451  | -2.61441479  | 0.009467 | 0.01433 | -3.97063945 |
| TK2      | -0.161121797 | 4.76850332 | -2.613762532 | 0.009485 | 0.01436 | -3.97229967 |
| M1AP     | -0.340564159 | 2.28143067 | -2.61364422  | 0.009488 | 0.01436 | -3.97260077 |
| SPTLC1   | -0.301470069 | 5.53173425 | -2.613230661 | 0.009499 | 0.01438 | -3.97365317 |
| MAK16    | -0.154562973 | 3.62575766 | -2.61300878  | 0.009505 | 0.01439 | -3.97421773 |
| CHGB     | 0.604633436  | 2.08298253 | 2.612085137  | 0.00953  | 0.01442 | -3.9765674  |
| ECT2L    | 0.112865173  | 0.62769825 | 2.611718515  | 0.00954  | 0.01444 | -3.97749984 |
| C17orf10 | 0.325377046  | 2.77192009 | 2.611061651  | 0.009558 | 0.01446 | -3.97917015 |
| HPCAL4   | 0.519220166  | 2.43498689 | 2.610935417  | 0.009562 | 0.01447 | -3.97949109 |
| MRAP2    | -0.128595208 | 0.30983112 | -2.609671274 | 0.009596 | 0.01452 | -3.98270435 |
| ZNF549   | -0.149519243 | 2.15243586 | -2.609460647 | 0.009602 | 0.01453 | -3.98323959 |
| CCDC57   | -0.191728154 | 2.89027333 | -2.60862402  | 0.009625 | 0.01456 | -3.98536519 |
| PHF7     | -0.140697034 | 2.21340087 | -2.608163454 | 0.009637 | 0.01458 | -3.98653506 |
| SIPA1L3  | -0.209727027 | 3.9540136  | -2.608118144 | 0.009639 | 0.01458 | -3.98665015 |
| PLCB1    | -0.163897342 | 1.13022643 | -2.606493603 | 0.009683 | 0.01464 | -3.99077498 |
| ADGRF5   | -0.34320501  | 5.36166226 | -2.606216515 | 0.009691 | 0.01465 | -3.99147829 |
| SEMA6C   | -0.184198604 | 1.85927074 | -2.605585951 | 0.009708 | 0.01468 | -3.99307852 |
| A2ML1    | -0.040126951 | 0.08097668 | -2.605432704 | 0.009713 | 0.01468 | -3.99346737 |
| TTC24    | 0.094221028  | 0.18324947 | 2.605311684  | 0.009716 | 0.01469 | -3.99377443 |
| SIGLEC10 | 0.245085201  | 1.73574301 | 2.60500567   | 0.009724 | 0.0147  | -3.99455082 |
| FUT9     | 0.132900189  | 0.16155428 | 2.604990253  | 0.009725 | 0.0147  | -3.99458993 |
| SFTPA2   | 0.49016526   | 1.0666687  | 2.604539797  | 0.009737 | 0.01472 | -3.99573262 |
| ZNF687   | -0.21286403  | 4.51921057 | -2.603892917 | 0.009755 | 0.01474 | -3.99737325 |
| SP4      | -0.217565789 | 3.40319628 | -2.602910707 | 0.009782 | 0.01478 | -3.99986362 |
| MDGA1    | -0.1366155   | 0.77299457 | -2.602820312 | 0.009785 | 0.01478 | -4.00009277 |
| CD47     | 0.264380509  | 6.00457148 | 2.602585083  | 0.009791 | 0.01479 | -4.00068904 |
| MCTP2    | 0.244164994  | 3.4881859  | 2.60123044   | 0.009829 | 0.01485 | -4.00412183 |
| ZNF598   | -0.158362716 | 4.07669934 | -2.601065563 | 0.009834 | 0.01485 | -4.00453952 |
| MTR      | -0.208682391 | 4.39991142 | -2.600695517 | 0.009844 | 0.01487 | -4.0054769  |
| CPAMD8   | 0.63643382   | 3.52436216 | 2.600501563  | 0.009849 | 0.01487 | -4.00596817 |
| MOB3C    | -0.172364534 | 3.76654064 | -2.600236348 | 0.009857 | 0.01488 | -4.00663987 |
| LRRC1    | -0.213681866 | 4.4041615  | -2.59995144  | 0.009865 | 0.0149  | -4.00736138 |
| PBLD     | -0.156971595 | 2.02184875 | -2.599264726 | 0.009884 | 0.01492 | -4.00910011 |
| NADSYN   | -0.138796386 | 3.44153505 | -2.599141425 | 0.009888 | 0.01493 | -4.00941226 |
| FAM124E  | -0.195324459 | 1.2720819  | -2.598963799 | 0.009893 | 0.01493 | -4.00986191 |
| C11orf16 | -0.048779851 | 0.15753437 | -2.598042669 | 0.009918 | 0.01497 | -4.01219325 |
| PER2     | -0.249460773 | 3.70189385 | -2.597800083 | 0.009925 | 0.01498 | -4.01280709 |
| SLC25A1  | -0.065301398 | 0.59168811 | -2.597725445 | 0.009927 | 0.01498 | -4.01299594 |

|          |              |            |              |          |         |             |
|----------|--------------|------------|--------------|----------|---------|-------------|
| CALB2    | 0.289839661  | 0.73962158 | 2.597071972  | 0.009946 | 0.01501 | -4.01464918 |
| ARHGAP   | -0.250342843 | 2.36216187 | -2.597039959 | 0.009947 | 0.01501 | -4.01473016 |
| CBFA2T1  | -0.20137084  | 1.5247725  | -2.596875593 | 0.009951 | 0.01501 | -4.01514593 |
| OLFML2I  | 0.344813254  | 3.78859983 | 2.596849662  | 0.009952 | 0.01501 | -4.01521152 |
| DMC1     | -0.077668457 | 0.47465766 | -2.596731532 | 0.009955 | 0.01502 | -4.01551032 |
| AP1AR    | -0.183082321 | 3.87816472 | -2.596618877 | 0.009959 | 0.01502 | -4.01579525 |
| C19orf71 | -0.260874121 | 3.06993212 | -2.596583275 | 0.00996  | 0.01502 | -4.01588529 |
| PWWP2    | -0.153769465 | 3.11109685 | -2.596403774 | 0.009965 | 0.01503 | -4.01633927 |
| ULK2     | -0.16457069  | 3.0492583  | -2.59596954  | 0.009977 | 0.01504 | -4.01743736 |
| LCP2     | 0.277305942  | 2.81765007 | 2.595545963  | 0.009989 | 0.01506 | -4.01850834 |
| NFATC3   | -0.232435801 | 2.61568592 | -2.595355263 | 0.009994 | 0.01507 | -4.01899045 |
| CAPN12   | 0.16938945   | 0.80876854 | 2.594087665  | 0.01003  | 0.01512 | -4.02219425 |
| ORAI2    | -0.19397413  | 4.94395544 | -2.593386635 | 0.01005  | 0.01515 | -4.02396544 |
| SETBP1   | -0.234964008 | 2.33053863 | -2.592874371 | 0.010065 | 0.01517 | -4.0252594  |
| ACAP2    | -0.216542722 | 3.94393965 | -2.592855157 | 0.010065 | 0.01517 | -4.02530793 |
| GPX2     | -0.265929446 | 0.50208229 | -2.5928252   | 0.010066 | 0.01517 | -4.0253836  |
| UBE2J1   | -0.173532374 | 5.90843865 | -2.592117753 | 0.010086 | 0.0152  | -4.02717017 |
| CACNG8   | -0.044735246 | 0.1371267  | -2.591593412 | 0.010101 | 0.01522 | -4.02849403 |
| LIPE     | -0.152930436 | 2.38125925 | -2.591580377 | 0.010102 | 0.01522 | -4.02852694 |
| FASLG    | 0.23472758   | 0.81145538 | 2.591536258  | 0.010103 | 0.01522 | -4.02863831 |
| ZC3HAV1  | -0.188504754 | 4.27772261 | -2.591333115 | 0.010109 | 0.01523 | -4.02915113 |
| SASH1    | -0.275843654 | 5.02623858 | -2.591223948 | 0.010112 | 0.01523 | -4.0294267  |
| GPHA2    | -0.077063003 | 0.15413731 | -2.591205906 | 0.010112 | 0.01523 | -4.02947224 |
| PTH2R    | 0.024918477  | 0.07458782 | 2.590850279  | 0.010123 | 0.01524 | -4.03036986 |
| XIRP1    | 0.18501358   | 0.1949439  | 2.590757799  | 0.010125 | 0.01525 | -4.03060326 |
| TWF1     | -0.213347394 | 5.81049607 | -2.590491186 | 0.010133 | 0.01526 | -4.0312761  |
| CACNG1   | 0.089771317  | 0.10108497 | 2.589813238  | 0.010152 | 0.01528 | -4.03298673 |
| SOX6     | -0.174028283 | 1.41321619 | -2.589569339 | 0.010159 | 0.01529 | -4.03360203 |
| USP41    | -0.111028844 | 0.11843386 | -2.589540081 | 0.01016  | 0.01529 | -4.03367584 |
| PCDH1    | 0.270111669  | 4.87918486 | 2.589498847  | 0.010161 | 0.01529 | -4.03377986 |
| CP       | 0.349795186  | 1.27214233 | 2.589260492  | 0.010168 | 0.0153  | -4.03438112 |
| PLTP     | 0.360797358  | 5.13084298 | 2.588574046  | 0.010188 | 0.01533 | -4.0361124  |
| SASS6    | -0.127575609 | 1.84868898 | -2.587938712 | 0.010206 | 0.01536 | -4.03771438 |
| GNGT2    | -0.182274827 | 1.91656738 | -2.587759698 | 0.010211 | 0.01536 | -4.03816569 |
| TMEM14   | -0.167057628 | 0.49926424 | -2.587700952 | 0.010213 | 0.01537 | -4.03831379 |
| TTC37    | -0.22264646  | 4.77012147 | -2.587375214 | 0.010223 | 0.01538 | -4.03913491 |
| OGA      | -0.186270287 | 6.17036556 | -2.587098022 | 0.010231 | 0.01539 | -4.03983359 |
| APBB2    | -0.221717753 | 4.33266136 | -2.586729546 | 0.010241 | 0.0154  | -4.04076224 |
| PRDM7    | -0.019577522 | 0.03472589 | -2.586508903 | 0.010248 | 0.01541 | -4.04131825 |
| VPS37C   | -0.139909409 | 4.31324384 | -2.585257999 | 0.010284 | 0.01546 | -4.04446964 |

|         |              |            |              |          |         |             |
|---------|--------------|------------|--------------|----------|---------|-------------|
| DBP     | -0.249760555 | 4.90130623 | -2.584608307 | 0.010303 | 0.01549 | -4.04610582 |
| SP7     | -0.134477382 | 0.34627337 | -2.58431509  | 0.010311 | 0.0155  | -4.04684413 |
| ZNF317  | -0.141287384 | 4.16912265 | -2.584134418 | 0.010317 | 0.01551 | -4.04729902 |
| NOX5    | -0.312422004 | 0.81928875 | -2.582793023 | 0.010356 | 0.01557 | -4.05067538 |
| TUBB    | -0.171612083 | 8.37787758 | -2.582260018 | 0.010371 | 0.01559 | -4.05201652 |
| DNAH1   | 0.143987252  | 1.58983012 | 2.58219619   | 0.010373 | 0.01559 | -4.0521771  |
| P2RY12  | 0.242927758  | 1.30811043 | 2.581763856  | 0.010386 | 0.01561 | -4.05326472 |
| AKAP6   | -0.173129421 | 1.69881303 | -2.581749189 | 0.010386 | 0.01561 | -4.05330161 |
| BMP1    | 0.244364618  | 5.04400589 | 2.581676844  | 0.010388 | 0.01561 | -4.05348359 |
| NFX1    | -0.165794102 | 4.66519905 | -2.581664837 | 0.010389 | 0.01561 | -4.05351379 |
| MANSC4  | 0.164657616  | 0.32542189 | 2.581649131  | 0.010389 | 0.01561 | -4.0535533  |
| HAUS4   | -0.194208165 | 4.66758254 | -2.581528759 | 0.010393 | 0.01561 | -4.05385607 |
| SLC25A1 | -0.141750576 | 3.20558359 | -2.58143499  | 0.010396 | 0.01561 | -4.05409192 |
| AQP1    | -0.308674627 | 7.19768621 | -2.581097622 | 0.010405 | 0.01563 | -4.05494041 |
| TESK1   | -0.147064134 | 5.00742649 | -2.580918437 | 0.010411 | 0.01563 | -4.05539102 |
| PPP3CA  | -0.17240501  | 4.9272339  | -2.580009537 | 0.010437 | 0.01567 | -4.05767624 |
| SLC16A3 | 0.317037793  | 3.80601429 | 2.579978049  | 0.010438 | 0.01567 | -4.0577554  |
| ZNF678  | -0.169218137 | 2.16332812 | -2.579359708 | 0.010457 | 0.0157  | -4.05930962 |
| ZSWIM5  | -0.30688366  | 3.74860355 | -2.579026536 | 0.010466 | 0.01571 | -4.06014692 |
| KIRREL1 | 0.247982098  | 3.67572598 | 2.578806386  | 0.010473 | 0.01572 | -4.06070012 |
| ZNF90   | 0.349969295  | 2.65353277 | 2.578669684  | 0.010477 | 0.01573 | -4.06104361 |
| GABRA5  | -0.088363577 | 0.15871057 | -2.578077739 | 0.010494 | 0.01575 | -4.06253078 |
| ZNF267  | 0.197978274  | 2.72597736 | 2.57807114   | 0.010495 | 0.01575 | -4.06254735 |
| RSPH101 | -0.01991563  | 0.05208748 | -2.576699172 | 0.010535 | 0.01581 | -4.06599295 |
| CTDSPL  | -0.176765874 | 3.37894038 | -2.576411635 | 0.010544 | 0.01582 | -4.06671486 |
| AREL1   | -0.173523016 | 4.52230626 | -2.574963727 | 0.010587 | 0.01588 | -4.0703489  |
| VXN     | -0.092681955 | 0.41426744 | -2.574872439 | 0.01059  | 0.01589 | -4.07057796 |
| RBBP9   | -0.248637587 | 5.90844745 | -2.574444092 | 0.010602 | 0.0159  | -4.07165264 |
| FANCA   | 0.145733503  | 1.19773592 | 2.573754972  | 0.010623 | 0.01593 | -4.07338122 |
| GAPT    | 0.205706941  | 1.1960597  | 2.573413325  | 0.010633 | 0.01595 | -4.07423804 |
| PPTC7   | -0.200769207 | 4.14983194 | -2.573349923 | 0.010635 | 0.01595 | -4.07439704 |
| XCL1    | 0.24509347   | 0.89086582 | 2.572609786  | 0.010657 | 0.01598 | -4.07625282 |
| PTX3    | -0.201169202 | 1.25797729 | -2.572471819 | 0.010661 | 0.01599 | -4.0765987  |
| ZNF558  | -0.176311591 | 2.93219431 | -2.570391437 | 0.010724 | 0.01608 | -4.08181197 |
| POU1F1  | -0.053763673 | 0.24648898 | -2.57037857  | 0.010724 | 0.01608 | -4.0818442  |
| TEX11   | 0.022269828  | 0.03767507 | 2.569400283  | 0.010754 | 0.01612 | -4.08429431 |
| AMOTL2  | -0.255003599 | 5.45389211 | -2.568343372 | 0.010786 | 0.01617 | -4.08694034 |
| RB1     | -0.209111255 | 4.77790172 | -2.567973965 | 0.010797 | 0.01618 | -4.08786493 |
| FCRL3   | 0.208835862  | 0.43067584 | 2.567832274  | 0.010802 | 0.01619 | -4.08821953 |
| FAM90A  | -0.270682249 | 1.23885416 | -2.567792293 | 0.010803 | 0.01619 | -4.08831959 |

|         |              |            |              |          |         |             |
|---------|--------------|------------|--------------|----------|---------|-------------|
| MYBPC3  | 0.031460915  | 0.09083286 | 2.567333294  | 0.010817 | 0.01621 | -4.08946816 |
| MYRFL   | -0.084124652 | 0.25269389 | -2.566739877 | 0.010835 | 0.01623 | -4.0909528  |
| SGK3    | 0.24290195   | 3.8353546  | 2.56661671   | 0.010838 | 0.01624 | -4.09126091 |
| FLII    | 0.188592442  | 6.32318918 | 2.565813321  | 0.010863 | 0.01627 | -4.09327026 |
| CDK11A  | -0.145908583 | 2.0557277  | -2.564624636 | 0.010899 | 0.01632 | -4.09624217 |
| FAM149E | -0.149562727 | 3.60496176 | -2.564580824 | 0.010901 | 0.01633 | -4.09635168 |
| ADAT3   | -0.195473358 | 1.66672526 | -2.564042119 | 0.010917 | 0.01635 | -4.09769808 |
| LINC022 | -0.150856835 | 0.5156932  | -2.563677863 | 0.010928 | 0.01636 | -4.09860833 |
| CRHR1   | -0.150856835 | 0.5156932  | -2.563677863 | 0.010928 | 0.01636 | -4.09860833 |
| RNFT2   | -0.137399231 | 1.66356654 | -2.563532458 | 0.010933 | 0.01637 | -4.09897165 |
| SHPK    | -0.146433203 | 2.52988503 | -2.563515048 | 0.010933 | 0.01637 | -4.09901515 |
| URB2    | -0.173866179 | 2.33223281 | -2.562938341 | 0.010951 | 0.01639 | -4.10045595 |
| FGF20   | 0.250961821  | 0.94064376 | 2.56288032   | 0.010953 | 0.01639 | -4.10060089 |
| RSPH14  | -0.13759876  | 1.05057314 | -2.562630835 | 0.01096  | 0.0164  | -4.10122408 |
| DGKQ    | -0.156219465 | 3.69325109 | -2.562629148 | 0.010961 | 0.0164  | -4.10122829 |
| GPSM3   | 0.309370096  | 4.21642705 | 2.562252641  | 0.010972 | 0.01642 | -4.10216865 |
| ZNF430  | 0.29597165   | 3.34990819 | 2.561954664  | 0.010981 | 0.01643 | -4.10291279 |
| NLRP2B  | -0.02018649  | 0.05350033 | -2.561268472 | 0.011002 | 0.01646 | -4.10462609 |
| CSPG5   | -0.153897336 | 0.96824472 | -2.560334732 | 0.011031 | 0.0165  | -4.10695678 |
| P2RX5   | 0.194649811  | 0.39411295 | 2.559734967  | 0.01105  | 0.01653 | -4.10845342 |
| CPM     | -0.269812519 | 3.33921205 | -2.558949869 | 0.011074 | 0.01656 | -4.11041203 |
| HMCES   | -0.160791671 | 6.00370664 | -2.55884873  | 0.011077 | 0.01657 | -4.1106643  |
| NXNL1   | -0.065291562 | 0.15507266 | -2.558119471 | 0.0111   | 0.0166  | -4.11248303 |
| ZNF165  | -0.167829139 | 2.96721622 | -2.557971256 | 0.011105 | 0.0166  | -4.1128526  |
| ITPK1   | -0.177318761 | 5.33778144 | -2.557603658 | 0.011116 | 0.01662 | -4.11376913 |
| ZNF655  | -0.185619388 | 4.25416416 | -2.556111123 | 0.011163 | 0.01669 | -4.11748917 |
| ATF1    | -0.231869984 | 4.88180601 | -2.556049295 | 0.011165 | 0.01669 | -4.11764323 |
| SIPA1L1 | 0.214667956  | 4.29089897 | 2.555740124  | 0.011174 | 0.0167  | -4.11841354 |
| NRAS    | -0.187443631 | 4.73396302 | -2.555078283 | 0.011195 | 0.01673 | -4.12006224 |
| CSE1L   | -0.150288937 | 5.65121419 | -2.55358474  | 0.011242 | 0.0168  | -4.1237813  |
| CD247   | 0.307093349  | 1.56175036 | 2.553332046  | 0.01125  | 0.01681 | -4.12441032 |
| EDEM1   | 0.256992487  | 5.15377746 | 2.553055997  | 0.011259 | 0.01682 | -4.12509742 |
| DOK1    | -0.187425481 | 4.02157424 | -2.552050797 | 0.01129  | 0.01687 | -4.1275988  |
| DNM3    | 0.150455385  | 1.24950281 | 2.550862473  | 0.011328 | 0.01692 | -4.13055467 |
| FBLN1   | 0.508008329  | 3.44310964 | 2.550839999  | 0.011329 | 0.01692 | -4.13061056 |
| ESYT3   | -0.28933166  | 2.90982068 | -2.55073363  | 0.011332 | 0.01693 | -4.13087508 |
| ALG1L2  | -0.104826252 | 0.53168081 | -2.550597747 | 0.011336 | 0.01693 | -4.13121298 |
| TBC1D2  | -0.149887372 | 3.91408974 | -2.550120487 | 0.011351 | 0.01695 | -4.13239964 |
| IGBP1   | -0.179473304 | 7.64151888 | -2.549330732 | 0.011376 | 0.01699 | -4.13436283 |
| CFAP97  | -0.01802644  | 0.04361812 | -2.54854961  | 0.011401 | 0.01702 | -4.136304   |



|         |              |            |              |          |         |             |
|---------|--------------|------------|--------------|----------|---------|-------------|
| MAMSTF  | -0.124498029 | 1.50132504 | -2.548457905 | 0.011404 | 0.01703 | -4.13653185 |
| LEPROT  | -0.159873446 | 4.81404299 | -2.548300002 | 0.011409 | 0.01703 | -4.13692418 |
| NISCH   | -0.193554776 | 5.34422424 | -2.548220593 | 0.011412 | 0.01704 | -4.13712146 |
| GPR65   | 0.211796098  | 1.14501574 | 2.548150145  | 0.011414 | 0.01704 | -4.13729649 |
| STRIP2  | 0.148706315  | 0.95525263 | 2.548049463  | 0.011417 | 0.01704 | -4.13754661 |
| USP6NL  | 0.179338385  | 2.59041843 | 2.546072382  | 0.01148  | 0.01713 | -4.1424564  |
| ZNF385C | -0.164873191 | 1.03280004 | -2.545957101 | 0.011484 | 0.01714 | -4.14274258 |
| SYCP3   | 0.088853816  | 0.52613187 | 2.545041689  | 0.011514 | 0.01718 | -4.14501454 |
| CREBRF  | -0.195434023 | 4.07273825 | -2.543828636 | 0.011553 | 0.01724 | -4.14802403 |
| RBM11   | -0.176929709 | 2.13551469 | -2.543607183 | 0.01156  | 0.01724 | -4.14857329 |
| KLK12   | 0.434930904  | 1.13779543 | 2.543599014  | 0.01156  | 0.01724 | -4.14859355 |
| GJA5    | -0.264834888 | 3.3722196  | -2.54330766  | 0.011569 | 0.01726 | -4.14931611 |
| TMCO3   | -0.203919778 | 2.59896724 | -2.543241305 | 0.011572 | 0.01726 | -4.14948066 |
| USH1G   | -0.03909637  | 0.05305779 | -2.543114882 | 0.011576 | 0.01726 | -4.14979416 |
| RCC2    | 0.181112577  | 6.15208009 | 2.54236961   | 0.0116   | 0.0173  | -4.15164195 |
| NCKAP5  | -0.094601704 | 0.49164689 | -2.541548318 | 0.011626 | 0.01734 | -4.15367763 |
| PTGES   | 0.299114603  | 2.13530669 | 2.54069422   | 0.011654 | 0.01738 | -4.15579395 |
| ZNF211  | -0.184589551 | 3.88968909 | -2.540666009 | 0.011655 | 0.01738 | -4.15586384 |
| LYG2    | -0.06176462  | 0.25677657 | -2.539815415 | 0.011683 | 0.01742 | -4.15797079 |
| SLC3A2  | -0.188890179 | 6.74446839 | -2.539116873 | 0.011705 | 0.01745 | -4.1597006  |
| CGAS    | 0.173036727  | 2.0536667  | 2.538566814  | 0.011723 | 0.01747 | -4.1610624  |
| ASB13   | -0.141770602 | 3.60962674 | -2.538388506 | 0.011729 | 0.01748 | -4.16150379 |
| TSNARE  | -0.174582304 | 3.74078305 | -2.537948282 | 0.011744 | 0.0175  | -4.16259339 |
| GOLT1A  | 0.47411402   | 4.41868146 | 2.537804998  | 0.011748 | 0.0175  | -4.162948   |
| CLOCK   | -0.19642268  | 3.58997099 | -2.537782281 | 0.011749 | 0.0175  | -4.16300421 |
| CNP     | -0.156774496 | 5.39250745 | -2.537106873 | 0.011771 | 0.01754 | -4.16467547 |
| STAC3   | 0.190543562  | 2.52894945 | 2.536720119  | 0.011784 | 0.01755 | -4.16563228 |
| E2F3    | -0.198133473 | 4.01899197 | -2.53603494  | 0.011806 | 0.01759 | -4.16732704 |
| CDC20B  | -0.053411009 | 0.10642699 | -2.535540661 | 0.011823 | 0.01761 | -4.16854934 |
| BHLHE2  | 0.177469789  | 0.37854296 | 2.534792348  | 0.011847 | 0.01764 | -4.17039942 |
| TENT4A  | -0.163538047 | 3.85874215 | -2.534606538 | 0.011853 | 0.01765 | -4.17085872 |
| HSF2BP  | -0.119752677 | 1.00279382 | -2.534087644 | 0.01187  | 0.01767 | -4.1721412  |
| ERCC6L  | -0.199026024 | 2.3947343  | -2.533594501 | 0.011887 | 0.0177  | -4.17335981 |
| RASAL2  | 0.198630026  | 2.69470696 | 2.533334754  | 0.011895 | 0.01771 | -4.17400158 |
| TMEM24  | -0.147194368 | 1.79919312 | -2.532362652 | 0.011928 | 0.01776 | -4.17640284 |
| JPH1    | 0.277033428  | 2.7139     | 2.531396464  | 0.01196  | 0.0178  | -4.17878863 |
| SESN2   | -0.263663513 | 3.91982936 | -2.530348379 | 0.011995 | 0.01785 | -4.18137567 |
| DNASE1  | -0.340075431 | 2.47645597 | -2.528910988 | 0.012043 | 0.01792 | -4.18492199 |
| SNAI3   | -0.162288889 | 2.17211084 | -2.527228684 | 0.012099 | 0.018   | -4.18907012 |
| ABHD4   | -0.18821132  | 5.27253324 | -2.526957224 | 0.012108 | 0.01802 | -4.18973923 |

|         |              |            |              |          |         |             |
|---------|--------------|------------|--------------|----------|---------|-------------|
| SPSB1   | 0.253477798  | 4.07621673 | 2.525324905  | 0.012163 | 0.0181  | -4.19376119 |
| C1QB    | 0.426108382  | 6.3896712  | 2.525289677  | 0.012164 | 0.0181  | -4.19384796 |
| PDCD6IF | -0.17658208  | 5.69388613 | -2.52471628  | 0.012184 | 0.01812 | -4.19526019 |
| TAC4    | -0.108517262 | 0.57830015 | -2.524560539 | 0.012189 | 0.01813 | -4.19564371 |
| NSUN3   | -0.141553178 | 2.45451662 | -2.524383474 | 0.012195 | 0.01814 | -4.19607971 |
| RBM5    | -0.19952155  | 4.85321726 | -2.523342781 | 0.01223  | 0.01819 | -4.19864174 |
| SEN7    | -0.211062375 | 3.60462527 | -2.523087709 | 0.012239 | 0.0182  | -4.19926953 |
| LRR17   | -0.264919913 | 2.58510926 | -2.52296832  | 0.012243 | 0.0182  | -4.19956336 |
| SLC30A1 | -0.020969669 | 0.03138578 | -2.522942339 | 0.012244 | 0.0182  | -4.19962729 |
| ADAMTS  | -0.316393328 | 3.34852867 | -2.522035854 | 0.012275 | 0.01825 | -4.20185776 |
| NUP160  | -0.197272434 | 4.11670688 | -2.521372807 | 0.012297 | 0.01828 | -4.20348875 |
| MAST3   | 0.202189494  | 3.50319709 | 2.520990691  | 0.01231  | 0.0183  | -4.20442851 |
| ANKLE2  | 0.170717283  | 3.94070652 | 2.520988817  | 0.01231  | 0.0183  | -4.20443312 |
| POLR2F  | -0.038556554 | 0.17503094 | -2.520317988 | 0.012333 | 0.01833 | -4.2060826  |
| PSIP1   | -0.178635368 | 5.0127408  | -2.520185456 | 0.012338 | 0.01833 | -4.20640843 |
| ASTL    | 0.143383121  | 0.24714489 | 2.5190988    | 0.012375 | 0.01839 | -4.20907935 |
| CCL5    | 0.492930601  | 4.68449367 | 2.518392456  | 0.012399 | 0.01842 | -4.2108149  |
| FKBP8   | -0.156968516 | 8.5067149  | -2.518272813 | 0.012403 | 0.01843 | -4.21110883 |
| XPO1    | -0.179692695 | 5.12899704 | -2.517801631 | 0.012419 | 0.01845 | -4.21226626 |
| SELENO  | -0.327369863 | 4.42102795 | -2.51779438  | 0.01242  | 0.01845 | -4.21228407 |
| ZNF283  | -0.12296156  | 1.6038427  | -2.517789387 | 0.01242  | 0.01845 | -4.21229633 |
| TEKT5   | -0.058987901 | 0.19837385 | -2.517137476 | 0.012442 | 0.01848 | -4.21389736 |
| OCLM    | 0.118710913  | 0.59236397 | 2.516726957  | 0.012456 | 0.0185  | -4.21490535 |
| ZNF418  | -0.171729771 | 2.57689421 | -2.516466672 | 0.012465 | 0.01851 | -4.21554438 |
| CLIP1   | -0.225260221 | 4.89754724 | -2.516116595 | 0.012477 | 0.01853 | -4.21640375 |
| DCLRE1  | -0.132276975 | 2.34664903 | -2.515870732 | 0.012486 | 0.01854 | -4.21700723 |
| SCN9A   | 0.135272333  | 0.37441915 | 2.515219773  | 0.012508 | 0.01857 | -4.21860477 |
| STRN4   | -0.138576971 | 5.14880791 | -2.515087346 | 0.012513 | 0.01857 | -4.21892971 |
| SPG11   | -0.205756215 | 4.83009906 | -2.514713124 | 0.012526 | 0.01859 | -4.21984788 |
| SH3BGR  | -0.257756675 | 7.07558919 | -2.513726847 | 0.01256  | 0.01864 | -4.2222671  |
| SLC44A1 | -0.210509547 | 5.71032232 | -2.513645642 | 0.012563 | 0.01864 | -4.22246625 |
| FAM92B  | 0.13952056   | 0.24614589 | 2.513472598  | 0.012569 | 0.01865 | -4.22289061 |
| SPIN1   | -0.22473757  | 6.15156544 | -2.513034619 | 0.012584 | 0.01867 | -4.22396453 |
| ETNK2   | 0.351146256  | 4.6773364  | 2.512389201  | 0.012607 | 0.0187  | -4.22554677 |
| CHP2    | -0.039851247 | 0.06177339 | -2.512372773 | 0.012607 | 0.0187  | -4.22558703 |
| PDS5B   | -0.188537395 | 3.15853228 | -2.512224984 | 0.012612 | 0.01871 | -4.22594928 |
| TNFSF8  | 0.248084721  | 1.04254936 | 2.512182571  | 0.012614 | 0.01871 | -4.22605324 |
| RCN3    | 0.297511476  | 3.83475047 | 2.512077999  | 0.012618 | 0.01871 | -4.22630954 |
| IER3    | 0.409144678  | 6.05345168 | 2.511937877  | 0.012623 | 0.01872 | -4.22665295 |
| DKK3    | -0.277940542 | 4.26128314 | -2.510876828 | 0.01266  | 0.01877 | -4.22925282 |

|         |              |            |              |          |         |             |
|---------|--------------|------------|--------------|----------|---------|-------------|
| ETV4    | 0.435394951  | 4.921852   | 2.509470757  | 0.012709 | 0.01884 | -4.23269648 |
| RHOV    | 0.376477419  | 2.41613569 | 2.507546449  | 0.012777 | 0.01894 | -4.2374064  |
| GCKR    | 0.128889818  | 0.45955819 | 2.507339885  | 0.012784 | 0.01895 | -4.23791178 |
| PLEKHG  | 0.276269306  | 3.76472609 | 2.5070374    | 0.012795 | 0.01896 | -4.23865176 |
| CFAP70  | -0.242658496 | 2.35327895 | -2.507027183 | 0.012795 | 0.01896 | -4.23867676 |
| NEDD4   | -0.219349425 | 2.65261269 | -2.506690213 | 0.012807 | 0.01898 | -4.239501   |
| ADNP    | -0.199698631 | 5.47362722 | -2.506649843 | 0.012808 | 0.01898 | -4.23959974 |
| CTBS    | -0.193176122 | 3.69238604 | -2.506587978 | 0.01281  | 0.01898 | -4.23975106 |
| EXOC5   | -0.1779096   | 3.64194955 | -2.505318698 | 0.012855 | 0.01905 | -4.24285472 |
| ERAP2   | 0.45903108   | 3.90008602 | 2.504603115  | 0.012881 | 0.01908 | -4.24460382 |
| TPCN1   | -0.203548058 | 5.63736323 | -2.504327328 | 0.012891 | 0.01909 | -4.24527779 |
| TUBA1A  | 0.276955182  | 6.0703573  | 2.503787355  | 0.01291  | 0.01912 | -4.24659719 |
| MYD88   | 0.211389386  | 4.66523407 | 2.502304841  | 0.012963 | 0.0192  | -4.25021825 |
| BNIP1   | 0.421132482  | 3.84948569 | 2.499830389  | 0.013051 | 0.01933 | -4.25625759 |
| ZBTB4   | -0.173933314 | 6.99143236 | -2.49953904  | 0.013062 | 0.01934 | -4.25696831 |
| FANCG   | -0.144951554 | 3.42453828 | -2.499085632 | 0.013078 | 0.01936 | -4.25807419 |
| PBRM1   | -0.216572306 | 4.27187634 | -2.498872331 | 0.013086 | 0.01937 | -4.25859438 |
| MAB21L  | -0.069012869 | 0.27716319 | -2.498871352 | 0.013086 | 0.01937 | -4.25859676 |
| ZNF507  | -0.178240173 | 3.12598067 | -2.49874133  | 0.01309  | 0.01938 | -4.25891383 |
| TES     | -0.210467066 | 6.31843716 | -2.49845508  | 0.013101 | 0.01939 | -4.25961182 |
| PRDM12  | -0.061675257 | 0.08063671 | -2.497374925 | 0.01314  | 0.01945 | -4.26224496 |
| USP42   | -0.160695236 | 2.84196423 | -2.497305102 | 0.013142 | 0.01945 | -4.26241514 |
| TNFRSF  | 0.160431341  | 0.31918555 | 2.496935736  | 0.013156 | 0.01947 | -4.26331529 |
| TINAGL1 | -0.237522514 | 5.98060747 | -2.49611687  | 0.013185 | 0.01951 | -4.26531042 |
| C1QC    | 0.401181214  | 6.3815591  | 2.495947373  | 0.013191 | 0.01952 | -4.26572331 |
| PBX1    | -0.248538097 | 4.26590562 | -2.495856019 | 0.013195 | 0.01952 | -4.26594584 |
| LY6G6F  | -0.07994727  | 0.25900731 | -2.495747899 | 0.013199 | 0.01952 | -4.2662092  |
| KAZN    | -0.237727855 | 2.72948969 | -2.495473445 | 0.013209 | 0.01954 | -4.26687766 |
| ANKRD3  | 0.096078547  | 0.57309301 | 2.495426793  | 0.01321  | 0.01954 | -4.26699128 |
| CHAMP1  | -0.231542781 | 4.10723707 | -2.495354545 | 0.013213 | 0.01954 | -4.26716723 |
| ADGRE1  | 0.1163191    | 0.44470361 | 2.495046738  | 0.013224 | 0.01955 | -4.26791681 |
| TAF2    | -0.211144152 | 3.42880178 | -2.494067105 | 0.01326  | 0.01961 | -4.27030185 |
| MORC2   | -0.147666638 | 4.15878334 | -2.493674772 | 0.013274 | 0.01963 | -4.27125678 |
| PROM2   | -0.306544199 | 5.3164766  | -2.493121092 | 0.013294 | 0.01965 | -4.27260419 |
| TRPV2   | 0.239050183  | 3.0474113  | 2.492798806  | 0.013306 | 0.01967 | -4.27338836 |
| IRGM    | 0.027579948  | 0.08999051 | 2.492328094  | 0.013323 | 0.01969 | -4.27453349 |
| BTC     | -0.212601306 | 3.81833298 | -2.492290774 | 0.013325 | 0.01969 | -4.27462427 |
| ZNF202  | -0.145750551 | 3.03337582 | -2.491717562 | 0.013346 | 0.01972 | -4.27601847 |
| M6PR    | -0.308521052 | 5.78474317 | -2.491498848 | 0.013354 | 0.01973 | -4.27655036 |
| ABCG1   | -0.242092139 | 3.71410538 | -2.489225913 | 0.013437 | 0.01985 | -4.28207524 |

|         |              |            |              |          |         |             |
|---------|--------------|------------|--------------|----------|---------|-------------|
| CISH    | -0.259274812 | 5.04544644 | -2.489174891 | 0.013439 | 0.01986 | -4.28219921 |
| GPR141  | -0.23219116  | 0.7298523  | -2.48890254  | 0.013449 | 0.01987 | -4.28286088 |
| ZFP90   | -0.145443189 | 3.61777504 | -2.488888255 | 0.01345  | 0.01987 | -4.28289559 |
| ZNF154  | -0.231883783 | 2.96443862 | -2.488842372 | 0.013452 | 0.01987 | -4.28300705 |
| ITIH1   | 0.039359622  | 0.05277297 | 2.487670234  | 0.013495 | 0.01993 | -4.28585391 |
| PVRIG   | 0.07081836   | 0.2738629  | 2.487619249  | 0.013497 | 0.01993 | -4.28597771 |
| NDRG1   | -0.196662397 | 5.27102067 | -2.486251973 | 0.013547 | 0.02001 | -4.28929683 |
| LAIR2   | 0.181694886  | 0.58159882 | 2.486053876  | 0.013555 | 0.02001 | -4.28977757 |
| GNB4    | 0.260043459  | 3.11258448 | 2.485789323  | 0.013565 | 0.02003 | -4.29041953 |
| OSBP2   | -0.167074447 | 2.6865633  | -2.485163101 | 0.013588 | 0.02006 | -4.29193886 |
| TRIM9   | -0.059622804 | 0.24957312 | -2.483829575 | 0.013638 | 0.02013 | -4.29517303 |
| ASNS    | -0.24434131  | 3.97036863 | -2.483445625 | 0.013652 | 0.02015 | -4.29610391 |
| HSPA13  | -0.231205041 | 4.5303086  | -2.482237863 | 0.013697 | 0.02022 | -4.2990312  |
| TMIGD2  | 0.161405122  | 0.49920865 | 2.481545092  | 0.013723 | 0.02025 | -4.30070968 |
| NFE4    | -0.045552575 | 0.14272782 | -2.480715839 | 0.013755 | 0.0203  | -4.30271825 |
| HS3ST3E | -0.167164216 | 0.97191759 | -2.480566485 | 0.01376  | 0.0203  | -4.30307994 |
| PVALEF  | -0.026935096 | 0.05296083 | -2.480334067 | 0.013769 | 0.02031 | -4.30364274 |
| SPAG4   | 0.303745229  | 2.54947306 | 2.479565     | 0.013798 | 0.02036 | -4.30550468 |
| HOMER2  | -0.20405687  | 3.60988212 | -2.479518626 | 0.0138   | 0.02036 | -4.30561694 |
| TMEM15  | -0.160697107 | 4.46056024 | -2.478695568 | 0.013831 | 0.0204  | -4.30760895 |
| SCN8A   | 0.125911885  | 0.52503805 | 2.477577172  | 0.013873 | 0.02046 | -4.31031475 |
| CLCN5   | -0.1422169   | 1.70657011 | -2.47722931  | 0.013886 | 0.02048 | -4.31115611 |
| PELP1   | -0.135568583 | 5.27760529 | -2.477070538 | 0.013892 | 0.02049 | -4.3115401  |
| CC2D2B  | -0.229928702 | 1.02724561 | -2.476275685 | 0.013923 | 0.02053 | -4.31346204 |
| RNF111  | -0.212149614 | 3.68299204 | -2.475432805 | 0.013955 | 0.02057 | -4.31549948 |
| MID2    | -0.235497914 | 3.40383091 | -2.474675104 | 0.013984 | 0.02062 | -4.31733046 |
| PCNX1   | -0.19854314  | 3.57310692 | -2.474606367 | 0.013986 | 0.02062 | -4.31749653 |
| ARFGAP  | -0.149687586 | 5.06797163 | -2.474430656 | 0.013993 | 0.02063 | -4.31792105 |
| KLHL20  | -0.215561172 | 3.62322085 | -2.473079992 | 0.014045 | 0.0207  | -4.32118328 |
| SMIM22  | -0.413659515 | 1.09643884 | -2.472894751 | 0.014052 | 0.02071 | -4.32163056 |
| TMEM98  | 0.337439782  | 6.08753608 | 2.472804451  | 0.014055 | 0.02071 | -4.32184858 |
| CCDC54  | -0.030905191 | 0.1073516  | -2.472018406 | 0.014086 | 0.02075 | -4.32374612 |
| GGT1    | -0.238539518 | 4.08626747 | -2.47140113  | 0.014109 | 0.02079 | -4.32523584 |
| GJA1    | -0.356101638 | 7.42653969 | -2.471021051 | 0.014124 | 0.02081 | -4.32615293 |
| CSRNP1  | -0.294329606 | 5.76623382 | -2.470629935 | 0.014139 | 0.02083 | -4.32709652 |
| IPP     | -0.203481632 | 4.06521123 | -2.470294178 | 0.014152 | 0.02085 | -4.32790644 |
| NARF    | -0.145556246 | 3.77234011 | -2.469728372 | 0.014174 | 0.02088 | -4.32927105 |
| GRAP2   | 0.162247904  | 0.69443448 | 2.4692309    | 0.014193 | 0.0209  | -4.3304706  |
| PFKFB3  | 0.303359694  | 3.7032491  | 2.467948663  | 0.014243 | 0.02097 | -4.3335614  |
| MSTN    | -0.131769264 | 0.5328515  | -2.467888465 | 0.014245 | 0.02098 | -4.33370647 |

|          |              |            |              |          |         |             |
|----------|--------------|------------|--------------|----------|---------|-------------|
| AKR1B1   | -0.296259419 | 5.54151257 | -2.467074753 | 0.014277 | 0.02102 | -4.33566706 |
| CFAP30C  | -0.279814393 | 2.11052152 | -2.466619913 | 0.014295 | 0.02104 | -4.3367627  |
| SCMH1    | -0.147059082 | 5.21116695 | -2.466379662 | 0.014304 | 0.02106 | -4.33734135 |
| MPND     | -0.148688529 | 5.23413842 | -2.466345801 | 0.014305 | 0.02106 | -4.3374229  |
| ADGRL3   | 0.14630988   | 0.26228129 | 2.466029519  | 0.014318 | 0.02107 | -4.33818458 |
| IL19     | -0.064499897 | 0.15255011 | -2.465973784 | 0.01432  | 0.02107 | -4.33831879 |
| NCLN     | -0.142717522 | 5.26785944 | -2.465615365 | 0.014334 | 0.02109 | -4.33918182 |
| N4BP2L10 | 0.206323325  | 3.34223147 | 2.465562447  | 0.014336 | 0.02109 | -4.33930923 |
| SLC17A7  | -0.088748491 | 0.38133621 | -2.465545527 | 0.014336 | 0.02109 | -4.33934997 |
| SCAMP4   | -0.180630198 | 5.56694824 | -2.464916843 | 0.014361 | 0.02113 | -4.34086343 |
| IGF2R    | 0.261258896  | 5.61266959 | 2.464746582  | 0.014368 | 0.02114 | -4.34127324 |
| TIMP2    | 0.24381261   | 6.53664491 | 2.464691585  | 0.01437  | 0.02114 | -4.34140561 |
| ACKR4    | 0.117085803  | 0.57350416 | 2.463974863  | 0.014398 | 0.02118 | -4.34313041 |
| ZNF33A   | -0.172952147 | 4.30309877 | -2.463909803 | 0.0144   | 0.02118 | -4.34328695 |
| PDP1     | 0.207918266  | 4.6529915  | 2.463766577  | 0.014406 | 0.02118 | -4.34363156 |
| TLL1     | -0.131799192 | 0.65637933 | -2.463518354 | 0.014416 | 0.0212  | -4.34422875 |
| ANKRD5   | -0.219150347 | 3.32527945 | -2.462234929 | 0.014466 | 0.02127 | -4.34731559 |
| FAM71F2  | -0.11474122  | 0.69419706 | -2.462010201 | 0.014475 | 0.02128 | -4.34785593 |
| SPIB     | 0.22521994   | 0.5122129  | 2.46196963   | 0.014477 | 0.02128 | -4.34795348 |
| PAQR8    | -0.223621549 | 2.48970094 | -2.461912584 | 0.014479 | 0.02128 | -4.34809063 |
| NGF      | -0.204542592 | 1.33429107 | -2.461643051 | 0.01449  | 0.0213  | -4.34873862 |
| LGALS4   | -0.158696999 | 0.74604718 | -2.460819612 | 0.014522 | 0.02134 | -4.35071786 |
| UNKL     | -0.209887598 | 2.60493915 | -2.460185427 | 0.014547 | 0.02138 | -4.35224177 |
| MGLL     | 0.212696933  | 3.25663094 | 2.460171184  | 0.014548 | 0.02138 | -4.35227599 |
| RORA     | -0.208236998 | 2.58406585 | -2.459408701 | 0.014578 | 0.02142 | -4.35410769 |
| GBP3     | 0.414795267  | 5.02559097 | 2.459258705  | 0.014584 | 0.02143 | -4.35446796 |
| CNGA4    | -0.075405017 | 0.29703462 | -2.458266724 | 0.014623 | 0.02148 | -4.35685002 |
| CMTM2    | -0.105096388 | 0.67708543 | -2.454832344 | 0.01476  | 0.02168 | -4.36508999 |
| CNIH3    | -0.174824852 | 2.39347817 | -2.45446145  | 0.014775 | 0.0217  | -4.3659792  |
| DCT      | -0.074163941 | 0.26559848 | -2.45406617  | 0.014791 | 0.02172 | -4.36692674 |
| VPS13C   | 0.229575801  | 3.87241395 | 2.452561232  | 0.014852 | 0.02181 | -4.37053294 |
| ECM2     | -0.25282308  | 2.49215829 | -2.452529046 | 0.014853 | 0.02181 | -4.37061004 |
| LINC0061 | 0.127737645  | 0.79421818 | 2.452421439  | 0.014857 | 0.02181 | -4.37086781 |
| TRPM8    | 0.062955235  | 0.08550943 | 2.4522333    | 0.014865 | 0.02182 | -4.37131847 |
| GRIK1    | 0.041688297  | 0.15859311 | 2.451085803  | 0.014911 | 0.02189 | -4.37406638 |
| CEND1    | -0.14965198  | 0.61861262 | -2.450584831 | 0.014932 | 0.02192 | -4.37526568 |
| TASOR    | -0.187510982 | 4.58196584 | -2.450527026 | 0.014934 | 0.02192 | -4.37540404 |
| PPARA    | -0.197616246 | 2.97045543 | -2.450058641 | 0.014953 | 0.02194 | -4.37652509 |
| ABCC11   | -0.32832089  | 0.81088995 | -2.450044163 | 0.014954 | 0.02194 | -4.37655974 |
| CFLAR    | 0.189797801  | 4.46950516 | 2.449505546  | 0.014975 | 0.02197 | -4.37784862 |

|          |              |            |              |          |         |             |
|----------|--------------|------------|--------------|----------|---------|-------------|
| GZMA     | 0.439766876  | 3.12743161 | 2.449387589  | 0.01498  | 0.02198 | -4.37813085 |
| CNOT6    | -0.177093541 | 4.09867981 | -2.449257312 | 0.014985 | 0.02198 | -4.37844254 |
| CENPE    | 0.105620286  | 0.59891194 | 2.44794689   | 0.015039 | 0.02206 | -4.38157688 |
| SPERT    | -0.099292891 | 0.11067585 | -2.447861004 | 0.015042 | 0.02206 | -4.38178225 |
| TRAPPC   | -0.199256001 | 4.03915699 | -2.447771407 | 0.015046 | 0.02207 | -4.38199649 |
| PDZD2    | -0.164249887 | 1.20254646 | -2.44742106  | 0.01506  | 0.02209 | -4.38283414 |
| TAS2R43  | -0.035558677 | 0.08834623 | -2.447174813 | 0.01507  | 0.0221  | -4.38342283 |
| PPAN     | -0.142902276 | 2.63899449 | -2.446240374 | 0.015108 | 0.02215 | -4.38565622 |
| LRCH1    | -0.167861427 | 3.00668777 | -2.445109792 | 0.015155 | 0.02222 | -4.38835732 |
| CLDND1   | -0.158699896 | 4.69524641 | -2.444358177 | 0.015186 | 0.02226 | -4.39015237 |
| GLRB     | 0.265698953  | 2.40730588 | 2.442523164  | 0.015261 | 0.02237 | -4.39453262 |
| GRAMD2   | 0.318777926  | 5.76853611 | 2.441456013  | 0.015305 | 0.02244 | -4.39707852 |
| SUPT16f  | -0.169975282 | 5.48878717 | -2.440908961 | 0.015328 | 0.02247 | -4.3983832  |
| COLGAL   | 0.155401822  | 4.62272769 | 2.44088758   | 0.015329 | 0.02247 | -4.39843419 |
| PPP1R12  | -0.192563152 | 3.93893263 | -2.440597486 | 0.015341 | 0.02248 | -4.39912592 |
| BAX      | -0.182742394 | 6.14863613 | -2.440522424 | 0.015344 | 0.02248 | -4.3993049  |
| H2AFX    | -0.244511541 | 5.75752577 | -2.439871741 | 0.015371 | 0.02252 | -4.40085614 |
| SH2D3A   | 0.209515922  | 3.59698614 | 2.4398045    | 0.015374 | 0.02252 | -4.40101642 |
| FBXL16   | 0.353569724  | 4.49710795 | 2.438529366  | 0.015427 | 0.0226  | -4.40405514 |
| SUCO     | -0.183025823 | 4.3544461  | -2.438416103 | 0.015432 | 0.0226  | -4.40432498 |
| ZCCHC1   | 1.017115594  | 7.33976862 | 2.438094821  | 0.015445 | 0.02262 | -4.40509034 |
| C3orf49  | -0.05292364  | 0.27543919 | -2.437964066 | 0.015451 | 0.02263 | -4.4054018  |
| KIAA1101 | -0.238033838 | 3.7697305  | -2.436987848 | 0.015491 | 0.02269 | -4.40772664 |
| RSPH9    | -0.140095423 | 1.21973344 | -2.436793101 | 0.0155   | 0.0227  | -4.40819033 |
| RANBP6   | -0.180867944 | 4.38067061 | -2.436594799 | 0.015508 | 0.02271 | -4.40866243 |
| CNTNAP   | -0.03887334  | 0.0931985  | -2.435956478 | 0.015535 | 0.02274 | -4.41018187 |
| INTS7    | -0.164870089 | 3.61876953 | -2.435330539 | 0.015561 | 0.02278 | -4.41167146 |
| GPR1     | 0.176425791  | 0.41975512 | 2.434678338  | 0.015588 | 0.02282 | -4.41322316 |
| STK32B   | -0.09323074  | 0.54428837 | -2.434029457 | 0.015616 | 0.02286 | -4.41476657 |
| SUMO4    | 0.072469571  | 0.33138552 | 2.43324669   | 0.015649 | 0.0229  | -4.41662792 |
| NT5C2    | -0.324589374 | 4.92326624 | -2.432226091 | 0.015692 | 0.02296 | -4.41905394 |
| EPC2     | -0.210353115 | 4.30792732 | -2.432086936 | 0.015698 | 0.02297 | -4.41938465 |
| DIPK1C   | 0.090187752  | 0.24335995 | 2.432044117  | 0.0157   | 0.02297 | -4.41948641 |
| IPO9     | -0.161714658 | 4.35228527 | -2.431953657 | 0.015703 | 0.02297 | -4.41970137 |
| BCLAF3   | -0.142323809 | 2.6501088  | -2.431229067 | 0.015734 | 0.02302 | -4.42142299 |
| GALNT1   | -0.194283659 | 5.31892476 | -2.429823836 | 0.015794 | 0.0231  | -4.42476042 |
| SVIL     | 0.266285136  | 5.49871526 | 2.429471536  | 0.015809 | 0.02312 | -4.42559684 |
| EPRS     | -0.217888976 | 5.98633494 | -2.429453973 | 0.01581  | 0.02312 | -4.42563853 |
| RBM17    | -0.145598804 | 5.22445099 | -2.429153507 | 0.015822 | 0.02314 | -4.4263518  |
| WNK3     | -0.14153068  | 0.89627793 | -2.428596532 | 0.015846 | 0.02317 | -4.42767376 |

|         |              |            |              |          |         |             |
|---------|--------------|------------|--------------|----------|---------|-------------|
| ZNF728  | -0.251836582 | 0.94511476 | -2.428543684 | 0.015848 | 0.02317 | -4.42779918 |
| KCNJ5   | 0.346360533  | 2.03345656 | 2.427928806  | 0.015875 | 0.02321 | -4.4292582  |
| FFAR1   | 0.147714055  | 0.3277022  | 2.42752112   | 0.015892 | 0.02323 | -4.43022538 |
| NCR3    | 0.212652927  | 0.75253591 | 2.427513646  | 0.015892 | 0.02323 | -4.43024312 |
| PRODH   | 0.236979457  | 1.39316644 | 2.426542239  | 0.015934 | 0.02329 | -4.43254704 |
| C1QA    | 0.378513679  | 6.82292831 | 2.426240993  | 0.015947 | 0.02331 | -4.43326133 |
| BFAR    | -0.153232783 | 5.44534388 | -2.425888488 | 0.015962 | 0.02333 | -4.43409706 |
| ZDHHC9  | -0.196336598 | 4.51614469 | -2.42558483  | 0.015975 | 0.02334 | -4.4348169  |
| CHD5    | 0.094538019  | 0.29521049 | 2.425276211  | 0.015988 | 0.02336 | -4.4355484  |
| INO80B  | -0.188664058 | 3.27604033 | -2.425103    | 0.015996 | 0.02337 | -4.43595891 |
| STX1B   | 0.177425782  | 0.9334846  | 2.42483379   | 0.016007 | 0.02339 | -4.43659689 |
| CACNA2  | -0.101297761 | 0.80177205 | -2.423906609 | 0.016047 | 0.02344 | -4.43879362 |
| CPSF4L  | -0.038721262 | 0.14378933 | -2.423595546 | 0.016061 | 0.02346 | -4.43953043 |
| PDZD3   | -0.043114959 | 0.09036357 | -2.423490741 | 0.016065 | 0.02346 | -4.43977866 |
| ZBTB1   | -0.212515523 | 4.21467846 | -2.422580013 | 0.016105 | 0.02352 | -4.44193527 |
| SMARCA  | -0.204743235 | 4.00849968 | -2.42183506  | 0.016137 | 0.02356 | -4.44369875 |
| LCOR    | -0.191675826 | 2.80189791 | -2.420973076 | 0.016175 | 0.02362 | -4.44573862 |
| UNC5A   | -0.072986883 | 0.22643583 | -2.420786767 | 0.016183 | 0.02363 | -4.44617943 |
| ABCD2   | 0.09549971   | 0.33109323 | 2.420423349  | 0.016198 | 0.02365 | -4.44703918 |
| CDK13   | -0.164773283 | 4.32817307 | -2.420304608 | 0.016204 | 0.02365 | -4.44732007 |
| PIP4K2B | -0.162159923 | 5.56167681 | -2.420255833 | 0.016206 | 0.02365 | -4.44743544 |
| FKTN    | -0.183781713 | 3.05013265 | -2.42013829  | 0.016211 | 0.02366 | -4.44771347 |
| EME2    | -0.191137958 | 2.17744515 | -2.419606122 | 0.016234 | 0.02369 | -4.44897208 |
| CRP     | 0.041984702  | 0.05186406 | 2.419221888  | 0.016251 | 0.02371 | -4.44988065 |
| UBA2    | -0.15854181  | 5.69943545 | -2.419179645 | 0.016253 | 0.02371 | -4.44998053 |
| SPINT1  | 0.271040327  | 7.55226405 | 2.418800011  | 0.016269 | 0.02374 | -4.45087808 |
| PRR5-AF | 0.045874479  | 0.21786122 | 2.418457075  | 0.016284 | 0.02376 | -4.45168874 |
| BMPR1B  | 0.064951293  | 0.1730717  | 2.418003809  | 0.016304 | 0.02378 | -4.45276005 |
| HEPACA  | -0.025753771 | 0.04784936 | -2.417648832 | 0.01632  | 0.0238  | -4.45359891 |
| ABHD12  | -0.141687533 | 7.16668209 | -2.41714988  | 0.016341 | 0.02383 | -4.45477781 |
| GALNT4  | 0.058834541  | 0.26399006 | 2.416269057  | 0.01638  | 0.02389 | -4.4568584  |
| RNF31   | -0.209965892 | 3.41724077 | -2.41550239  | 0.016414 | 0.02394 | -4.45866876 |
| NIPBL   | -0.185299211 | 4.26303796 | -2.41476522  | 0.016446 | 0.02398 | -4.46040895 |
| SLC4A2  | -0.200645986 | 4.84734403 | -2.413125711 | 0.016519 | 0.02408 | -4.46427741 |
| AHCTF1  | -0.181293331 | 3.87259588 | -2.412789266 | 0.016534 | 0.0241  | -4.46507095 |
| STIMATE | -0.059627175 | 0.30100413 | -2.41210888  | 0.016564 | 0.02415 | -4.46667539 |
| GPS2    | -0.184187291 | 2.18513632 | -2.412076662 | 0.016565 | 0.02415 | -4.46675135 |
| ACTR3   | -0.16583417  | 5.02722371 | -2.411514488 | 0.01659  | 0.02418 | -4.46807669 |
| BAIAP2L | -0.179618123 | 1.39078247 | -2.410871719 | 0.016619 | 0.02422 | -4.46959166 |
| SORBS1  | -0.206228461 | 1.80955228 | -2.410604277 | 0.016631 | 0.02424 | -4.4702219  |

|         |              |            |              |          |         |             |
|---------|--------------|------------|--------------|----------|---------|-------------|
| TRIM65  | -0.146409977 | 4.66673603 | -2.410468962 | 0.016637 | 0.02424 | -4.47054074 |
| STPG3   | -0.231605165 | 1.24020516 | -2.409819069 | 0.016666 | 0.02428 | -4.47207187 |
| REC8    | 0.328160101  | 2.52905957 | 2.409614739  | 0.016675 | 0.02429 | -4.47255319 |
| P3H1    | -0.151239376 | 3.67280395 | -2.408957208 | 0.016704 | 0.02433 | -4.47410179 |
| IKBKE   | -0.208770126 | 4.40507882 | -2.408766358 | 0.016713 | 0.02434 | -4.4745512  |
| ELL2    | -0.220078869 | 4.099337   | -2.408533515 | 0.016723 | 0.02436 | -4.47509944 |
| ZNF681  | -0.135578428 | 1.61674396 | -2.407806771 | 0.016756 | 0.0244  | -4.47681029 |
| ZNF622  | -0.176288813 | 6.02054832 | -2.407413776 | 0.016774 | 0.02443 | -4.47773525 |
| RAB42   | 0.189806953  | 1.30852975 | 2.406970465  | 0.016793 | 0.02445 | -4.47877846 |
| LYPD1   | 0.27404762   | 1.08553428 | 2.406953251  | 0.016794 | 0.02445 | -4.47881896 |
| LRRC75  | -0.244707862 | 3.76727628 | -2.406807677 | 0.016801 | 0.02446 | -4.47916149 |
| RAP1GD  | -0.164878676 | 4.30554613 | -2.406000243 | 0.016837 | 0.02451 | -4.48106096 |
| ARIH1   | -0.154604372 | 3.27239191 | -2.405872451 | 0.016843 | 0.02452 | -4.48136153 |
| PCOLCE  | 0.32950362   | 4.51825213 | 2.404702411  | 0.016896 | 0.02459 | -4.48411281 |
| PSORS1  | 0.218613837  | 1.49644236 | 2.40468841   | 0.016896 | 0.02459 | -4.48414572 |
| NBPF11  | -0.186736112 | 2.40058499 | -2.404532957 | 0.016903 | 0.0246  | -4.48451116 |
| ARRB2   | 0.181491306  | 3.89133887 | 2.404031138  | 0.016926 | 0.02463 | -4.48569069 |
| SEMA3A  | 0.189909056  | 1.05244181 | 2.403999012  | 0.016927 | 0.02463 | -4.48576619 |
| HCN3    | -0.141785488 | 1.83193691 | -2.403836222 | 0.016935 | 0.02464 | -4.48614877 |
| CYP1A1  | -0.115807491 | 0.14906032 | -2.403511715 | 0.01695  | 0.02466 | -4.48691134 |
| TUBB8P  | -0.098228866 | 0.37578342 | -2.403331895 | 0.016958 | 0.02467 | -4.48733386 |
| P2RY2   | 0.240602702  | 3.95534283 | 2.402667686  | 0.016988 | 0.02471 | -4.48889429 |
| GLI2    | 0.135087563  | 0.50875272 | 2.402305758  | 0.017004 | 0.02473 | -4.48974439 |
| RAD54B  | -0.054061127 | 0.3944525  | -2.402138241 | 0.017012 | 0.02474 | -4.49013782 |
| YJEFN3  | -0.267041814 | 1.67388198 | -2.402001824 | 0.017018 | 0.02475 | -4.49045818 |
| MYBL2   | 0.25933227   | 1.80986461 | 2.401194363  | 0.017055 | 0.0248  | -4.49235409 |
| MAN2A1  | -0.211824    | 3.46524189 | -2.400992794 | 0.017064 | 0.02481 | -4.49282728 |
| CLCF1   | 0.329014466  | 4.31664673 | 2.400912149  | 0.017068 | 0.02481 | -4.49301659 |
| G3BP1   | -0.160080141 | 4.73644327 | -2.400408278 | 0.017091 | 0.02484 | -4.49419923 |
| MUC13   | 0.029538127  | 0.06345717 | 2.400301519  | 0.017096 | 0.02485 | -4.49444977 |
| RPS19   | -0.187192438 | 8.94148932 | -2.399496011 | 0.017132 | 0.0249  | -4.49633982 |
| PHF13   | 0.174416301  | 4.59413642 | 2.399302818  | 0.017141 | 0.02491 | -4.49679304 |
| TPM2    | -0.295552204 | 4.93686201 | -2.397614161 | 0.017219 | 0.02502 | -4.50075303 |
| GRM2    | 0.050267016  | 0.20914943 | 2.397458819  | 0.017226 | 0.02503 | -4.50111718 |
| NSG1    | 0.284674693  | 0.82830088 | 2.3964038    | 0.017274 | 0.0251  | -4.50358976 |
| ATP6V0I | 0.231404477  | 0.91316031 | 2.3963703    | 0.017276 | 0.0251  | -4.50366825 |
| B3GALT  | -0.213690676 | 4.36019488 | -2.396360972 | 0.017276 | 0.0251  | -4.50369011 |
| KDM5C   | -0.173062438 | 5.47110903 | -2.395506981 | 0.017316 | 0.02515 | -4.50569075 |
| SPINK7  | 0.057071501  | 0.1397093  | 2.395463576  | 0.017318 | 0.02515 | -4.50579242 |
| FAM90A  | -0.01750527  | 0.03385289 | -2.395178186 | 0.017331 | 0.02517 | -4.50646083 |



|          |              |            |              |          |         |             |
|----------|--------------|------------|--------------|----------|---------|-------------|
| KCNK15   | 0.359498082  | 3.26723419 | 2.395147796  | 0.017332 | 0.02517 | -4.50653201 |
| THSD4    | 0.281425187  | 3.54503058 | 2.394782246  | 0.017349 | 0.02519 | -4.50738805 |
| SYTL4    | -0.23541917  | 2.64615175 | -2.394642067 | 0.017356 | 0.0252  | -4.50771629 |
| CAVIN4   | -0.13019051  | 0.64619572 | -2.394614182 | 0.017357 | 0.0252  | -4.50778158 |
| TMEM45   | -0.297107176 | 3.95593836 | -2.394388833 | 0.017367 | 0.02521 | -4.5083092  |
| C12orf56 | 0.121017491  | 0.40030621 | 2.393456475  | 0.017411 | 0.02527 | -4.51049168 |
| SUPT5H   | -0.137520398 | 6.0687823  | -2.393221286 | 0.017421 | 0.02529 | -4.51104208 |
| MED13L   | -0.206163011 | 3.63882407 | -2.392593403 | 0.017451 | 0.02532 | -4.51251125 |
| PIGR     | 0.301604127  | 1.33280571 | 2.392574294  | 0.017452 | 0.02532 | -4.51255595 |
| COL9A2   | -0.328863198 | 3.24142683 | -2.392002286 | 0.017478 | 0.02536 | -4.51389405 |
| EFNA2    | 0.059055547  | 0.14011665 | 2.391907251  | 0.017483 | 0.02537 | -4.51411633 |
| SOX15    | -0.176287806 | 1.32092156 | -2.390397857 | 0.017553 | 0.02547 | -4.51764563 |
| TET3     | 0.205598623  | 2.66666841 | 2.389837475  | 0.017579 | 0.0255  | -4.51895539 |
| HBA1     | -0.170542317 | 0.50075592 | -2.389366201 | 0.017601 | 0.02553 | -4.52005665 |
| HIF1AN   | -0.137395447 | 3.43549493 | -2.389155893 | 0.017611 | 0.02554 | -4.52054803 |
| RHOBTB   | -0.169753489 | 5.47092591 | -2.388563708 | 0.017639 | 0.02558 | -4.52193142 |
| PRIM1    | -0.168707981 | 2.74766676 | -2.388476597 | 0.017643 | 0.02559 | -4.52213489 |
| TYW1B    | -0.233786223 | 1.91512283 | -2.387864817 | 0.017672 | 0.02562 | -4.52356367 |
| ZNF700   | -0.152368723 | 3.0457178  | -2.387838891 | 0.017673 | 0.02562 | -4.52362421 |
| IL13     | 0.018635977  | 0.03037467 | 2.387826493  | 0.017673 | 0.02562 | -4.52365316 |
| CACHD1   | -0.278895634 | 3.38151352 | -2.387697482 | 0.01768  | 0.02563 | -4.52395441 |
| OR2L13   | -0.143632398 | 0.3122875  | -2.387542041 | 0.017687 | 0.02564 | -4.52431735 |
| GMFB     | -0.177622945 | 4.18898738 | -2.387093233 | 0.017708 | 0.02567 | -4.52536516 |
| CDC42SI  | -0.18688141  | 6.11332787 | -2.386543961 | 0.017734 | 0.0257  | -4.52664725 |
| SLITRK6  | 0.238897328  | 0.39401598 | 2.386264592  | 0.017747 | 0.02572 | -4.52729924 |
| ETS2     | -0.191887152 | 5.72964589 | -2.385821919 | 0.017768 | 0.02575 | -4.52833219 |
| NAT10    | -0.126545921 | 4.73636073 | -2.384743854 | 0.017819 | 0.02582 | -4.53084704 |
| NUP93    | -0.163041887 | 3.81914093 | -2.384743153 | 0.017819 | 0.02582 | -4.53084867 |
| ABCE1    | -0.162781875 | 4.44908924 | -2.384667697 | 0.017823 | 0.02582 | -4.53102465 |
| DOCK10   | -0.260745128 | 2.36800048 | -2.38466204  | 0.017823 | 0.02582 | -4.53103784 |
| ADAM23   | 0.1314151    | 0.3473772  | 2.383633763  | 0.017872 | 0.02589 | -4.53343545 |
| ITGA9    | 0.331374039  | 5.78971714 | 2.383004439  | 0.017901 | 0.02593 | -4.53490234 |
| IQGAP1   | 0.253828574  | 6.49785289 | 2.382615508  | 0.01792  | 0.02595 | -4.53580872 |
| SLC24A1  | -0.175699691 | 2.72902157 | -2.382305922 | 0.017935 | 0.02597 | -4.53653008 |
| MAP1S    | 0.158334499  | 4.86100291 | 2.381317374  | 0.017982 | 0.02604 | -4.5388329  |
| CTNS     | -0.149999262 | 4.0928001  | -2.381194678 | 0.017988 | 0.02604 | -4.53911865 |
| ELOVL5   | -0.21804797  | 5.69793063 | -2.380816708 | 0.018006 | 0.02607 | -4.53999884 |
| CPS1     | -0.191477395 | 0.73943885 | -2.379911381 | 0.018049 | 0.02613 | -4.54210657 |
| ASCL5    | 0.160072589  | 0.73042226 | 2.379543377  | 0.018067 | 0.02615 | -4.54296311 |
| CEACAM   | -0.212196572 | 1.64593964 | -2.379381936 | 0.018074 | 0.02616 | -4.54333883 |

|        |              |            |              |          |         |             |
|--------|--------------|------------|--------------|----------|---------|-------------|
| HYPK   | -0.097105285 | 0.8442846  | -2.379141771 | 0.018086 | 0.02617 | -4.54389772 |
| GFI1   | 0.180790455  | 0.89643369 | 2.377249697  | 0.018177 | 0.0263  | -4.54829889 |
| IL1B   | 0.283093802  | 1.55066698 | 2.375832416  | 0.018245 | 0.0264  | -4.55159344 |
| ZNF432 | -0.157471934 | 3.18972469 | -2.375740211 | 0.01825  | 0.0264  | -4.55180771 |
| ZZEF1  | -0.172825542 | 3.56177211 | -2.375477941 | 0.018262 | 0.02642 | -4.55241715 |
| YTHDC2 | -0.167411218 | 3.13102596 | -2.374534675 | 0.018308 | 0.02648 | -4.55460847 |
| FNBP1  | 0.188618331  | 5.0097121  | 2.374306389  | 0.018319 | 0.0265  | -4.55513868 |
| SPACA6 | -0.26081202  | 2.98928912 | -2.374109226 | 0.018329 | 0.02651 | -4.55559657 |
| DDX60L | 0.168512235  | 2.3929953  | 2.373484565  | 0.018359 | 0.02655 | -4.55704702 |
| TAL2   | -0.053886143 | 0.17897063 | -2.373230615 | 0.018372 | 0.02657 | -4.55763659 |
| HCAR3  | 0.077776333  | 0.20517394 | 2.373171128  | 0.018374 | 0.02657 | -4.55777469 |
| PLD5   | -0.088488096 | 0.0908173  | -2.372508371 | 0.018407 | 0.02661 | -4.55931301 |
| ZNF441 | -0.194612451 | 3.24057534 | -2.371095357 | 0.018476 | 0.02671 | -4.56259138 |
| REM2   | -0.136393376 | 0.79358452 | -2.370818297 | 0.018489 | 0.02673 | -4.56323397 |
| LTA4H  | -0.147994178 | 5.65527718 | -2.370289186 | 0.018515 | 0.02676 | -4.56446095 |
| ZDHHC2 | -0.17414867  | 3.28028085 | -2.370265203 | 0.018516 | 0.02676 | -4.56451656 |
| CLSTN3 | -0.209431652 | 4.78783354 | -2.369781435 | 0.01854  | 0.02679 | -4.56563816 |
| SMG9   | -0.144575397 | 3.72650479 | -2.369427131 | 0.018557 | 0.02682 | -4.56645946 |
| WBP2NL | -0.13198041  | 0.81411684 | -2.369165443 | 0.01857  | 0.02683 | -4.56706599 |
| STON2  | -0.229386857 | 3.06668824 | -2.369085336 | 0.018574 | 0.02684 | -4.56725165 |
| MARF1  | -0.178502958 | 4.67938549 | -2.368976047 | 0.01858  | 0.02684 | -4.56750493 |
| DNAJB5 | -0.265318967 | 3.84515802 | -2.368890527 | 0.018584 | 0.02685 | -4.56770312 |
| CAMSAP | 0.200247457  | 3.45806707 | 2.368810604  | 0.018588 | 0.02685 | -4.56788833 |
| RUBCNL | 0.257194724  | 1.9997159  | 2.367964119  | 0.018629 | 0.02691 | -4.56984958 |
| KRT81  | -0.196861004 | 1.55760002 | -2.367300606 | 0.018662 | 0.02695 | -4.57138642 |
| HOXB8  | -0.080216257 | 0.12211965 | -2.366830692 | 0.018685 | 0.02698 | -4.57247459 |
| CTNNA1 | -0.185071345 | 7.27622634 | -2.366268203 | 0.018713 | 0.02702 | -4.57377687 |
| TNFRSF | 0.257158065  | 0.79928091 | 2.365078635  | 0.018772 | 0.0271  | -4.57652999 |
| MAP3K2 | -0.180418252 | 1.93666324 | -2.364830212 | 0.018784 | 0.02712 | -4.57710477 |
| MGAT5  | -0.204727389 | 4.60720598 | -2.364005035 | 0.018825 | 0.02718 | -4.57901358 |
| CPSF7  | -0.170657396 | 5.5380768  | -2.363284328 | 0.018861 | 0.02722 | -4.5806802  |
| SORCS1 | -0.38415457  | 1.29697062 | -2.363267952 | 0.018862 | 0.02722 | -4.58071807 |
| RFX1   | -0.156670451 | 4.17857405 | -2.36254982  | 0.018898 | 0.02727 | -4.58237824 |
| ITPKB  | -0.18707558  | 4.40080456 | -2.361620667 | 0.018944 | 0.02734 | -4.58452554 |
| HES6   | -0.407448189 | 4.10160753 | -2.361195252 | 0.018965 | 0.02736 | -4.58550841 |
| RAD50  | -0.183995363 | 4.27448035 | -2.361169815 | 0.018967 | 0.02736 | -4.58556718 |
| AEBP2  | -0.173627362 | 4.41322583 | -2.361161518 | 0.018967 | 0.02736 | -4.58558635 |
| MYO9A  | -0.190330622 | 2.92046099 | -2.360956556 | 0.018977 | 0.02738 | -4.58605982 |
| VNN2   | 0.206324363  | 0.92831381 | 2.360905258  | 0.01898  | 0.02738 | -4.58617832 |
| CA8    | -0.177006402 | 0.36485967 | -2.360226488 | 0.019014 | 0.02743 | -4.58774601 |

|         |              |            |              |          |         |             |
|---------|--------------|------------|--------------|----------|---------|-------------|
| CCDC131 | -0.095791582 | 0.65761485 | -2.359538851 | 0.019048 | 0.02747 | -4.58933374 |
| DAAM1   | -0.144168205 | 3.1038266  | -2.359435574 | 0.019053 | 0.02748 | -4.58957216 |
| DNAJC51 | -0.112495465 | 0.22773282 | -2.359351742 | 0.019058 | 0.02748 | -4.58976569 |
| FCHSD1  | 0.234030004  | 3.47071685 | 2.357742364  | 0.019139 | 0.0276  | -4.59347967 |
| FIBIN   | -0.449256703 | 2.52665471 | -2.357468674 | 0.019152 | 0.02761 | -4.59411103 |
| MIPOL1  | -0.113703511 | 1.07749431 | -2.357177917 | 0.019167 | 0.02763 | -4.59478168 |
| CLGN    | 0.24598672   | 0.66011758 | 2.356146635  | 0.019219 | 0.02771 | -4.59715976 |
| PIIP5K1 | -0.131283413 | 3.05704629 | -2.355915262 | 0.019231 | 0.02772 | -4.59769316 |
| THAP10  | -0.156710045 | 2.79756727 | -2.355593513 | 0.019247 | 0.02774 | -4.59843482 |
| CCDC93  | -0.178946748 | 3.97205438 | -2.355374958 | 0.019258 | 0.02775 | -4.59893855 |
| IRF9    | 0.212762257  | 2.13198402 | 2.354977575  | 0.019279 | 0.02778 | -4.59985434 |
| NIPAL2  | 0.200633834  | 3.5703405  | 2.354849493  | 0.019285 | 0.02779 | -4.60014948 |
| MEX3C   | 0.217971977  | 4.29586288 | 2.353901331  | 0.019333 | 0.02786 | -4.60233386 |
| RHCG    | -0.086622675 | 0.13677585 | -2.353400818 | 0.019359 | 0.02789 | -4.60348661 |
| AKAP13  | 0.227902273  | 4.96653902 | 2.352999237  | 0.019379 | 0.02792 | -4.60441133 |
| CAMK2B  | -0.22189801  | 4.19437084 | -2.352910126 | 0.019384 | 0.02792 | -4.60461651 |
| ASTN1   | -0.189640459 | 0.30249584 | -2.351955601 | 0.019432 | 0.02799 | -4.60681381 |
| YIPF7   | -0.043506428 | 0.19536365 | -2.351465675 | 0.019457 | 0.02802 | -4.60794128 |
| CAV2    | 0.327853818  | 6.2045313  | 2.350841789  | 0.019489 | 0.02807 | -4.60937671 |
| MTM1    | -0.214357379 | 4.2361724  | -2.350808955 | 0.019491 | 0.02807 | -4.60945224 |
| B3GALT1 | -0.041182326 | 0.13543604 | -2.350042436 | 0.01953  | 0.02812 | -4.61121531 |
| CD248   | -0.296460015 | 4.63843896 | -2.349852306 | 0.01954  | 0.02813 | -4.61165255 |
| DIP2B   | -0.184013737 | 3.47310981 | -2.349277841 | 0.01957  | 0.02817 | -4.61297341 |
| TNPO2   | -0.135967187 | 5.28012837 | -2.348836485 | 0.019592 | 0.0282  | -4.61398801 |
| VPREB3  | -0.311854848 | 1.48662252 | -2.347822281 | 0.019645 | 0.02828 | -4.61631879 |
| ARHGAP  | -0.156672634 | 1.46566023 | -2.347615213 | 0.019655 | 0.02829 | -4.61679455 |
| MMP21   | -0.060438056 | 0.16093625 | -2.347513153 | 0.019661 | 0.02829 | -4.61702902 |
| CCDC191 | -0.064783498 | 0.0906979  | -2.347232668 | 0.019675 | 0.02831 | -4.61767336 |
| NCAPH   | 0.16642083   | 1.16664838 | 2.347054742  | 0.019684 | 0.02832 | -4.61808206 |
| CHAD    | -0.253858029 | 1.63775838 | -2.346704994 | 0.019702 | 0.02835 | -4.61888536 |
| TMEM21  | -0.090863071 | 0.07137522 | -2.34619303  | 0.019729 | 0.02838 | -4.62006102 |
| SOGA1   | -0.261293722 | 4.34953235 | -2.346018666 | 0.019738 | 0.02839 | -4.62046137 |
| ITPRIP  | -0.212808616 | 4.71910117 | -2.34463846  | 0.01981  | 0.02849 | -4.62362939 |
| CLEC2L  | -0.106990381 | 0.20414345 | -2.34411932  | 0.019837 | 0.02853 | -4.62482053 |
| CR1L    | 0.052352892  | 0.14217566 | 2.343845811  | 0.019851 | 0.02855 | -4.62544798 |
| LRRC40  | -0.169889069 | 3.58554224 | -2.343713534 | 0.019858 | 0.02855 | -4.6257514  |
| PPP2R31 | -0.153323919 | 2.32245946 | -2.343374383 | 0.019875 | 0.02858 | -4.6265293  |
| RUFY2   | -0.150451989 | 2.74391266 | -2.343023188 | 0.019894 | 0.0286  | -4.6273347  |
| CYLD    | -0.165371222 | 4.12071171 | -2.34209694  | 0.019942 | 0.02867 | -4.62945834 |
| FBXL7   | -0.185470057 | 2.5912698  | -2.342054932 | 0.019944 | 0.02867 | -4.62955464 |

|          |              |            |              |          |         |             |
|----------|--------------|------------|--------------|----------|---------|-------------|
| GBP6     | 0.151442812  | 0.61502868 | 2.341440008  | 0.019976 | 0.02871 | -4.63096402 |
| APELA    | -0.148714205 | 0.17576093 | -2.341164242 | 0.019991 | 0.02873 | -4.63159595 |
| SCGB3A   | -0.470203553 | 2.38803378 | -2.340828347 | 0.020008 | 0.02875 | -4.63236558 |
| OXTR     | 0.125190313  | 0.82976176 | 2.340629035  | 0.020019 | 0.02877 | -4.6328222  |
| NLRP11   | -0.039448219 | 0.05360929 | -2.340368145 | 0.020033 | 0.02878 | -4.63341985 |
| SETD9    | -0.179301399 | 3.10709845 | -2.340200021 | 0.020041 | 0.02879 | -4.63380495 |
| GTF2IRC  | 0.185673906  | 4.92753311 | 2.339986958  | 0.020053 | 0.02881 | -4.63429296 |
| SIPA1L2  | 0.252097313  | 4.35079227 | 2.339417138  | 0.020083 | 0.02885 | -4.63559788 |
| RGS22    | -0.055261613 | 0.15533801 | -2.339083571 | 0.0201   | 0.02887 | -4.63636162 |
| TCAP     | -0.20452732  | 1.50229361 | -2.33905669  | 0.020102 | 0.02887 | -4.63642316 |
| F2R      | -0.290726117 | 4.95888572 | -2.339026217 | 0.020103 | 0.02887 | -4.63649293 |
| CRKL     | -0.173218855 | 5.20196165 | -2.338898054 | 0.02011  | 0.02888 | -4.63678634 |
| ITIH3    | -0.091731959 | 0.37583824 | -2.338726089 | 0.020119 | 0.02889 | -4.63718    |
| MAN2A2   | -0.224080875 | 4.30334241 | -2.338222146 | 0.020146 | 0.02892 | -4.63833348 |
| FFAR3    | -0.044846195 | 0.09752498 | -2.338085402 | 0.020153 | 0.02893 | -4.63864643 |
| AQP6     | -0.143162172 | 0.37441543 | -2.337757839 | 0.02017  | 0.02896 | -4.63939602 |
| HOXC8    | 0.128701902  | 0.1900336  | 2.336796346  | 0.020221 | 0.02903 | -4.6415957  |
| RBFOX2   | -0.206806297 | 4.72614787 | -2.33632835  | 0.020246 | 0.02906 | -4.64266606 |
| C1orf198 | -0.219928381 | 5.28147606 | -2.335685325 | 0.02028  | 0.0291  | -4.64413639 |
| FBLN5    | -0.27253967  | 3.88493244 | -2.335658357 | 0.020281 | 0.0291  | -4.64419805 |
| CCL21    | -0.80948599  | 3.3845882  | -2.33490213  | 0.020321 | 0.02916 | -4.64592671 |
| ERP27    | 0.443760529  | 4.2710194  | 2.33476801   | 0.020328 | 0.02917 | -4.64623324 |
| SLC25A4  | -0.174034766 | 0.82332908 | -2.334383824 | 0.020349 | 0.02919 | -4.6471112  |
| ZNF792   | -0.145944558 | 2.1299436  | -2.334270001 | 0.020355 | 0.0292  | -4.64737129 |
| C1QTNF   | 0.288115329  | 4.62595223 | 2.334230451  | 0.020357 | 0.0292  | -4.64746166 |
| ETV3     | -0.189468128 | 3.58280298 | -2.334131789 | 0.020362 | 0.02921 | -4.64768709 |
| PGBD5    | -0.266602742 | 2.55791684 | -2.333668195 | 0.020387 | 0.02924 | -4.64874622 |
| VPS35    | -0.149673148 | 5.17285892 | -2.333582964 | 0.020392 | 0.02924 | -4.64894092 |
| ZNF721   | -0.143511076 | 3.47434707 | -2.332787323 | 0.020434 | 0.0293  | -4.65075811 |
| BRD1     | -0.173604495 | 4.36473532 | -2.33197108  | 0.020478 | 0.02936 | -4.65262175 |
| TGFA     | 0.359887163  | 5.36294102 | 2.331882384  | 0.020482 | 0.02937 | -4.65282422 |
| MESP2    | -0.160564727 | 0.6293462  | -2.330790069 | 0.020541 | 0.02945 | -4.65531711 |
| PKD1L3   | 0.02452545   | 0.10856459 | 2.33068704   | 0.020546 | 0.02945 | -4.65555218 |
| GLYATL   | 0.035842845  | 0.08697005 | 2.330582604  | 0.020552 | 0.02946 | -4.65579045 |
| OCLN     | -0.312683552 | 4.16614917 | -2.33040049  | 0.020562 | 0.02947 | -4.65620593 |
| ZBED2    | -0.391110642 | 7.11364103 | -2.330211798 | 0.020572 | 0.02948 | -4.65663639 |
| RASA1    | 0.285587628  | 5.39047938 | 2.330193188  | 0.020573 | 0.02948 | -4.65667884 |
| PMM2     | -0.149993235 | 1.86805385 | -2.329508275 | 0.02061  | 0.02953 | -4.65824099 |
| ARHGAP   | -0.20442398  | 5.08705227 | -2.329035294 | 0.020635 | 0.02956 | -4.65931952 |
| RAB27A   | 0.340195157  | 6.04996746 | 2.329029307  | 0.020636 | 0.02956 | -4.65933317 |

|         |              |            |              |          |         |             |
|---------|--------------|------------|--------------|----------|---------|-------------|
| WLS     | 0.237416918  | 4.77871344 | 2.32876662   | 0.02065  | 0.02958 | -4.65993207 |
| CARD10  | -0.171494503 | 3.04472375 | -2.32789838  | 0.020697 | 0.02965 | -4.66191113 |
| CENPI   | 0.07346998   | 0.46670908 | 2.326287877  | 0.020784 | 0.02977 | -4.66558022 |
| ARL9    | -0.211879316 | 1.45881072 | -2.325998123 | 0.020799 | 0.02979 | -4.66624008 |
| TAS2R3  | 0.038324247  | 0.11386218 | 2.325081157  | 0.020849 | 0.02986 | -4.6683278  |
| NPAS3   | 0.190306968  | 2.14175077 | 2.325067188  | 0.02085  | 0.02986 | -4.6683596  |
| OR7C1   | -0.047709752 | 0.16673441 | -2.324327436 | 0.02089  | 0.02991 | -4.67004326 |
| ARGLU1  | -0.231584386 | 5.52110223 | -2.323968805 | 0.02091  | 0.02994 | -4.67085931 |
| OTUD6B  | -0.156213399 | 2.95462729 | -2.323453887 | 0.020938 | 0.02997 | -4.67203077 |
| OPRL1   | -0.158205808 | 1.46357598 | -2.323164918 | 0.020954 | 0.02999 | -4.67268808 |
| TRAF7   | -0.160950168 | 5.61346313 | -2.321554852 | 0.021042 | 0.03012 | -4.67634902 |
| TDG     | -0.15155835  | 3.21233429 | -2.321272804 | 0.021057 | 0.03014 | -4.67699009 |
| TTC28   | -0.163345948 | 3.37490707 | -2.320886634 | 0.021078 | 0.03016 | -4.67786769 |
| BCL2L14 | 0.062957967  | 0.15470015 | 2.319699479  | 0.021144 | 0.03025 | -4.68056472 |
| RIN2    | -0.204218505 | 5.12615752 | -2.319679714 | 0.021145 | 0.03025 | -4.68060961 |
| LRP4    | 0.519832356  | 5.45546389 | 2.318780713  | 0.021194 | 0.03032 | -4.6826511  |
| MEIS3   | 0.166635397  | 1.39352912 | 2.31867676   | 0.0212   | 0.03033 | -4.68288712 |
| CLK2    | -0.16822738  | 5.05276526 | -2.318366392 | 0.021217 | 0.03035 | -4.68359171 |
| EXPH5   | 0.166306383  | 1.5789226  | 2.317700854  | 0.021254 | 0.0304  | -4.68510229 |
| IGFLR1  | 0.199539911  | 1.50134897 | 2.317367536  | 0.021272 | 0.03042 | -4.68585868 |
| CREBZF  | -0.214905388 | 4.74384649 | -2.317186871 | 0.021282 | 0.03044 | -4.68626861 |
| MBOAT4  | -0.055951818 | 0.27588825 | -2.317065527 | 0.021289 | 0.03044 | -4.68654392 |
| LOXL3   | 0.153375672  | 1.53991747 | 2.316724325  | 0.021308 | 0.03047 | -4.68731799 |
| RBM12   | -0.188982669 | 4.81738052 | -2.316126987 | 0.021341 | 0.03051 | -4.68867288 |
| OR56B4  | -0.02942818  | 0.09110711 | -2.31582672  | 0.021358 | 0.03053 | -4.68935382 |
| PNPLA3  | 0.064970042  | 0.18926103 | 2.315426818  | 0.02138  | 0.03056 | -4.69026059 |
| EPB41L2 | -0.205742151 | 3.4882732  | -2.315200485 | 0.021392 | 0.03058 | -4.69077372 |
| SGCE    | -0.303327673 | 4.67570861 | -2.314990681 | 0.021404 | 0.03059 | -4.69124934 |
| CYP4Z1  | 0.084122813  | 0.22131799 | 2.314842649  | 0.021412 | 0.0306  | -4.6915849  |
| TMEM20  | 0.046297185  | 0.15633613 | 2.31319172   | 0.021504 | 0.03073 | -4.69532582 |
| KCNG2   | -0.043805228 | 0.08784426 | -2.313084575 | 0.02151  | 0.03074 | -4.69556852 |
| LCK     | 0.326263353  | 2.34244238 | 2.31296452   | 0.021517 | 0.03074 | -4.69584044 |
| TPP1    | 0.177755475  | 6.86536309 | 2.312716511  | 0.021531 | 0.03076 | -4.69640215 |
| POLQ    | 0.055986892  | 0.28254585 | 2.311970975  | 0.021573 | 0.03082 | -4.69809032 |
| MSH5-S/ | -0.10488664  | 0.68417356 | -2.311321471 | 0.021609 | 0.03087 | -4.69956062 |
| RAB21   | -0.138147863 | 4.10311356 | -2.310745684 | 0.021641 | 0.03091 | -4.70086371 |
| ZNF333  | -0.135394505 | 1.94427413 | -2.310732119 | 0.021642 | 0.03091 | -4.70089441 |
| CCL15   | -0.116745216 | 0.17534173 | -2.310646568 | 0.021647 | 0.03091 | -4.701088   |
| LRR8E   | 0.088662155  | 0.48789624 | 2.310423779  | 0.02166  | 0.03093 | -4.7015921  |
| PRELP   | 0.406228799  | 3.07578056 | 2.309798718  | 0.021695 | 0.03098 | -4.70300616 |

|         |              |            |              |          |         |             |
|---------|--------------|------------|--------------|----------|---------|-------------|
| RPS8    | -0.164621829 | 9.97546665 | -2.309240994 | 0.021726 | 0.03102 | -4.70426758 |
| PKDREJ  | -0.029504734 | 0.13740054 | -2.308415233 | 0.021773 | 0.03108 | -4.70613469 |
| MYO1A   | -0.059868221 | 0.23136086 | -2.307532322 | 0.021823 | 0.03115 | -4.70813032 |
| POGLUT  | -0.175413775 | 4.05879141 | -2.307319571 | 0.021835 | 0.03117 | -4.70861108 |
| MBNL2   | -0.166077308 | 5.08472965 | -2.306302202 | 0.021892 | 0.03124 | -4.7109095  |
| KCNN1   | -0.150522924 | 0.29775395 | -2.306113975 | 0.021903 | 0.03126 | -4.71133464 |
| PRRX1   | 0.312747811  | 2.8689216  | 2.305398103  | 0.021944 | 0.03131 | -4.71295121 |
| RASGRF  | -0.195390201 | 1.54241923 | -2.304663385 | 0.021985 | 0.03137 | -4.71460985 |
| NPAP1   | -0.08608743  | 0.2369341  | -2.30438503  | 0.022001 | 0.03139 | -4.71523811 |
| SHISAL2 | -0.020445084 | 0.04454554 | -2.303980471 | 0.022024 | 0.03142 | -4.71615108 |
| MED15   | 0.152685665  | 4.77784032 | 2.303965215  | 0.022025 | 0.03142 | -4.7161855  |
| HPS1    | -0.124836658 | 5.5461403  | -2.303289017 | 0.022064 | 0.03147 | -4.71771114 |
| GIPR    | 0.173436535  | 1.03923413 | 2.300766609  | 0.022208 | 0.03167 | -4.72339838 |
| ABC7    | -0.166320565 | 4.37985575 | -2.299881834 | 0.022259 | 0.03174 | -4.72539186 |
| KLF11   | -0.213150102 | 3.79087383 | -2.298693691 | 0.022328 | 0.03184 | -4.7280677  |
| LCN8    | -0.265360203 | 0.95788204 | -2.298566054 | 0.022335 | 0.03185 | -4.72835507 |
| THOC3   | -0.178412894 | 3.51136876 | -2.298242129 | 0.022354 | 0.03187 | -4.72908432 |
| MTRNR2  | 0.214606332  | 1.33191854 | 2.297162241  | 0.022416 | 0.03196 | -4.73151474 |
| DCP1A   | -0.167513652 | 3.79552939 | -2.296827783 | 0.022436 | 0.03198 | -4.73226726 |
| BHLHE4  | 0.346660623  | 7.39946274 | 2.296098327  | 0.022478 | 0.03204 | -4.73390814 |
| ATXN7L2 | -0.150579711 | 2.67308354 | -2.296000841 | 0.022484 | 0.03205 | -4.73412739 |
| GPD2    | -0.201655848 | 4.55976634 | -2.295541959 | 0.02251  | 0.03208 | -4.73515933 |
| CCDC20  | -0.112356336 | 0.99839548 | -2.295284861 | 0.022525 | 0.0321  | -4.73573741 |
| PCDHGA  | -0.039532779 | 0.16611975 | -2.2952743   | 0.022526 | 0.0321  | -4.73576116 |
| ATP4B   | -0.146942991 | 1.03011256 | -2.293712982 | 0.022617 | 0.03222 | -4.73927039 |
| AFF3    | 0.177341517  | 0.53155116 | 2.293338882  | 0.022639 | 0.03225 | -4.74011088 |
| GPR18   | 0.178057803  | 0.64268548 | 2.292930617  | 0.022663 | 0.03228 | -4.74102798 |
| SLC5A12 | -0.035549391 | 0.09637243 | -2.291627713 | 0.022739 | 0.03239 | -4.74395368 |
| DOCK11  | 0.252804061  | 4.42465601 | 2.291509419  | 0.022746 | 0.0324  | -4.74421924 |
| STX17   | -0.202551134 | 3.20498154 | -2.291455411 | 0.022749 | 0.0324  | -4.74434047 |
| PTPRK   | 0.216093846  | 4.03160102 | 2.291295607  | 0.022758 | 0.03241 | -4.74469918 |
| KCNA1   | -0.065146051 | 0.09445047 | -2.291264532 | 0.02276  | 0.03241 | -4.74476893 |
| MGAT4A  | -0.157831453 | 3.45478782 | -2.291203738 | 0.022764 | 0.03241 | -4.74490539 |
| INSIG1  | -0.163780022 | 4.26863499 | -2.288947188 | 0.022897 | 0.0326  | -4.74996786 |
| DLGAP5  | 0.176269605  | 1.01283162 | 2.288877536  | 0.022901 | 0.0326  | -4.75012404 |
| HAPLN1  | -0.226922553 | 1.0612301  | -2.288197608 | 0.022941 | 0.03266 | -4.75164845 |
| CUL9    | -0.136779446 | 3.54160463 | -2.287942224 | 0.022956 | 0.03267 | -4.75222091 |
| BPIFA1  | 0.066243723  | 0.14802435 | 2.287825796  | 0.022963 | 0.03268 | -4.75248187 |
| FOX1    | 0.122106778  | 0.73778882 | 2.287499267  | 0.022982 | 0.03271 | -4.75321368 |
| SQSTM1  | -0.168069071 | 7.50603191 | -2.287100823 | 0.023006 | 0.03274 | -4.75410654 |

|          |              |            |              |          |         |             |
|----------|--------------|------------|--------------|----------|---------|-------------|
| RHOBTB   | 0.246467129  | 4.9723031  | 2.286980644  | 0.023013 | 0.03275 | -4.75437581 |
| FNDC3A   | -0.217498271 | 5.5001994  | -2.286360631 | 0.02305  | 0.03279 | -4.7557648  |
| CYP4B1   | 0.43804296   | 4.23700866 | 2.285653287  | 0.023092 | 0.03285 | -4.75734899 |
| DES12    | -0.170443679 | 4.85211684 | -2.285214996 | 0.023118 | 0.03289 | -4.75833036 |
| CCL26    | 0.175878094  | 0.93714091 | 2.281613298  | 0.023333 | 0.03319 | -4.76638805 |
| PSD      | -0.177176654 | 1.68676196 | -2.281544305 | 0.023337 | 0.03319 | -4.76654228 |
| KSR2     | -0.147792514 | 1.28439937 | -2.281003579 | 0.023369 | 0.03324 | -4.7677509  |
| RAET1L   | 0.09827016   | 0.3255194  | 2.280777465  | 0.023383 | 0.03325 | -4.76825622 |
| HLA-DME  | -0.230964288 | 5.99094746 | -2.280283977 | 0.023413 | 0.03329 | -4.76935891 |
| FAM91A   | -0.170215313 | 4.45716579 | -2.27981019  | 0.023441 | 0.03333 | -4.77041736 |
| SPATA3   | 0.077406252  | 0.4974758  | 2.279598806  | 0.023454 | 0.03334 | -4.77088953 |
| C2CD4D   | -0.128985466 | 1.10412888 | -2.279576812 | 0.023455 | 0.03334 | -4.77093866 |
| MIA      | 0.110508605  | 0.29819095 | 2.27945897   | 0.023462 | 0.03335 | -4.77120186 |
| CPNE6    | -0.10791773  | 0.13907659 | -2.279201748 | 0.023478 | 0.03337 | -4.77177633 |
| SLFN14   | 0.019408242  | 0.04017103 | 2.279153722  | 0.023481 | 0.03337 | -4.77188358 |
| COX8C    | -0.04816553  | 0.14051861 | -2.278930583 | 0.023494 | 0.03339 | -4.77238187 |
| VSTM4    | -0.392381115 | 5.63774635 | -2.277342212 | 0.02359  | 0.03352 | -4.77592748 |
| CHST2    | 0.340227044  | 5.67706416 | 2.276730309  | 0.023627 | 0.03357 | -4.77729275 |
| BCL7C    | -0.178189116 | 5.35944734 | -2.27585583  | 0.02368  | 0.03364 | -4.77924327 |
| FLG2     | 0.014791071  | 0.02419881 | 2.27573597   | 0.023688 | 0.03365 | -4.77951056 |
| KLK1     | 0.095154043  | 0.27227851 | 2.274754364  | 0.023748 | 0.03373 | -4.78169906 |
| KLRC4-K  | 0.095154043  | 0.27227851 | 2.274754364  | 0.023748 | 0.03373 | -4.78169906 |
| FAM92A   | -0.122906222 | 2.88424915 | -2.274224413 | 0.02378  | 0.03377 | -4.78288021 |
| ZNF682   | -0.238352469 | 2.928579   | -2.274158114 | 0.023784 | 0.03378 | -4.78302796 |
| PCYOX1   | -0.140028641 | 2.30699414 | -2.274078694 | 0.023789 | 0.03378 | -4.78320494 |
| PIK3CA   | 0.192634863  | 3.11044589 | 2.273996     | 0.023794 | 0.03379 | -4.78338921 |
| AP3S1    | -0.144504422 | 5.53664702 | -2.272540813 | 0.023883 | 0.03391 | -4.78663086 |
| GPR183   | 0.36871648   | 4.01753396 | 2.272252541  | 0.0239   | 0.03393 | -4.78727279 |
| LDHAL6E  | 0.027836209  | 0.08799675 | 2.271473899  | 0.023948 | 0.034   | -4.7890063  |
| TIMELESS | -0.162078075 | 3.4612442  | -2.27121721  | 0.023964 | 0.03402 | -4.78957765 |
| NUDT2    | -0.173283544 | 3.84864768 | -2.271025606 | 0.023976 | 0.03403 | -4.79000409 |
| ANKZF1   | -0.165435761 | 3.96447228 | -2.270238419 | 0.024024 | 0.0341  | -4.79175571 |
| ABCC10   | -0.137571439 | 3.31590472 | -2.269860174 | 0.024047 | 0.03412 | -4.79259716 |
| KYNU     | 0.101511131  | 0.56117341 | 2.269847213  | 0.024048 | 0.03412 | -4.79262599 |
| PHF19    | 0.169150242  | 3.20969307 | 2.26946427   | 0.024072 | 0.03415 | -4.79347775 |
| ARHGDI   | 0.080945911  | 0.20633829 | 2.269400106  | 0.024076 | 0.03416 | -4.79362045 |
| FOLR2    | 0.296215367  | 3.93679748 | 2.268562423  | 0.024127 | 0.03423 | -4.79548313 |
| ARSH     | -0.058725725 | 0.20966167 | -2.267458661 | 0.024196 | 0.03432 | -4.79793647 |
| BMI1     | -0.158768878 | 4.86412894 | -2.267363551 | 0.024201 | 0.03433 | -4.79814781 |
| CTAGE8   | -0.09538575  | 0.40642723 | -2.267248079 | 0.024209 | 0.03433 | -4.79840439 |

|          |              |            |              |          |         |             |
|----------|--------------|------------|--------------|----------|---------|-------------|
| PDGFRL   | -0.252650544 | 5.96101601 | -2.266000258 | 0.024286 | 0.03444 | -4.8011763  |
| EOMES    | 0.216455486  | 0.68939258 | 2.265642556  | 0.024308 | 0.03447 | -4.80197062 |
| DIS3     | -0.151713778 | 3.74343036 | -2.265445488 | 0.024321 | 0.03448 | -4.80240819 |
| FLG      | 0.09610028   | 0.32399194 | 2.265386965  | 0.024324 | 0.03449 | -4.80253813 |
| S1PR4    | 0.231601362  | 2.28614097 | 2.265316554  | 0.024329 | 0.03449 | -4.80269445 |
| LILRA2   | 0.122019459  | 0.84850695 | 2.263603514  | 0.024435 | 0.03464 | -4.8064963  |
| LRFN3    | -0.163294174 | 3.3102265  | -2.263471476 | 0.024444 | 0.03465 | -4.80678922 |
| H1FNT    | -0.058369587 | 0.18544071 | -2.262810069 | 0.024485 | 0.0347  | -4.8082563  |
| TFPI     | -0.171960773 | 1.70081142 | -2.262733604 | 0.02449  | 0.03471 | -4.80842588 |
| FMR1NB   | -0.045268919 | 0.15356796 | -2.262640713 | 0.024496 | 0.03471 | -4.80863188 |
| FLVCR2   | 0.193392905  | 2.82769246 | 2.262454972  | 0.024507 | 0.03473 | -4.80904377 |
| PRDM8    | 0.107429836  | 0.46706616 | 2.262008452  | 0.024535 | 0.03476 | -4.81003382 |
| NAA80    | -0.140827532 | 4.02855535 | -2.261763541 | 0.02455  | 0.03478 | -4.81057678 |
| RPL36A   | -0.171736504 | 5.3765514  | -2.261107192 | 0.024592 | 0.03484 | -4.81203158 |
| AKT3     | 0.203842299  | 4.3438789  | 2.259721789  | 0.024679 | 0.03496 | -4.81510101 |
| MCM4     | 0.208924374  | 4.09101077 | 2.259527843  | 0.024691 | 0.03497 | -4.81553056 |
| RPLP0    | -0.1716316   | 9.5700127  | -2.259053184 | 0.024721 | 0.03501 | -4.81658168 |
| ITPKC    | 0.185894674  | 5.30017507 | 2.25883269   | 0.024735 | 0.03503 | -4.81706989 |
| TMEFF1   | -0.087434662 | 0.35413879 | -2.258399733 | 0.024762 | 0.03506 | -4.8180284  |
| MMP28    | -0.240140088 | 3.4776846  | -2.258111732 | 0.02478  | 0.03509 | -4.81866589 |
| ADPGK    | -0.132841127 | 4.66634035 | -2.257262393 | 0.024834 | 0.03516 | -4.82054546 |
| PHF20    | -0.148934108 | 3.89014422 | -2.257157813 | 0.024841 | 0.03517 | -4.82077685 |
| ATAD3B   | -0.173484556 | 2.7068357  | -2.257043547 | 0.024848 | 0.03517 | -4.82102965 |
| AURKB    | 0.210454811  | 1.42628764 | 2.256862248  | 0.02486  | 0.03519 | -4.82143074 |
| CEP104   | -0.153661759 | 3.8703825  | -2.256799994 | 0.024863 | 0.03519 | -4.82156845 |
| STK32A   | 0.352147437  | 4.42042204 | 2.256534324  | 0.02488  | 0.03521 | -4.82215612 |
| C1orf112 | 0.11805116   | 1.46729092 | 2.256419428  | 0.024888 | 0.03522 | -4.82241025 |
| CNFN     | 0.294822673  | 3.44302866 | 2.256310346  | 0.024895 | 0.03522 | -4.82265151 |
| TSTD3    | -0.057300872 | 0.28708081 | -2.255970153 | 0.024916 | 0.03525 | -4.82340386 |
| BCL6     | 0.204294024  | 4.2195661  | 2.255627327  | 0.024938 | 0.03528 | -4.82416192 |
| ZC3H4    | -0.143197687 | 4.6611063  | -2.255538239 | 0.024944 | 0.03529 | -4.82435889 |
| TWIST1   | 0.240892061  | 1.65822186 | 2.255417548  | 0.024951 | 0.03529 | -4.82462572 |
| RFPL2    | -0.051933305 | 0.13252734 | -2.254414984 | 0.025015 | 0.03538 | -4.82684176 |
| GLIS1    | -0.179266351 | 0.66892575 | -2.254108906 | 0.025035 | 0.0354  | -4.82751812 |
| ZBBX     | -0.041166681 | 0.07439362 | -2.254070215 | 0.025037 | 0.03541 | -4.82760361 |
| NPC2     | 0.281570118  | 10.8101586 | 2.252888236  | 0.025113 | 0.03551 | -4.83021462 |
| BAG6     | -0.124965605 | 7.24263366 | -2.252785105 | 0.025119 | 0.03552 | -4.83044237 |
| SRSF11   | -0.189406773 | 5.67146793 | -2.252263274 | 0.025153 | 0.03556 | -4.83159464 |
| HECW1    | -0.110898164 | 0.18051777 | -2.252256471 | 0.025153 | 0.03556 | -4.83160966 |
| FOXK2    | -0.116579883 | 4.26681445 | -2.251719212 | 0.025187 | 0.0356  | -4.83279572 |



|         |              |            |              |          |         |             |
|---------|--------------|------------|--------------|----------|---------|-------------|
| GALNT1  | 0.107571067  | 0.19655971 | 2.251643535  | 0.025192 | 0.03561 | -4.83296276 |
| CEP164  | -0.149522306 | 3.23474617 | -2.251436424 | 0.025206 | 0.03562 | -4.83341989 |
| XCL2    | 0.285070079  | 1.25538326 | 2.251082991  | 0.025228 | 0.03565 | -4.83419989 |
| KDM2A   | -0.159526627 | 5.2135829  | -2.250824808 | 0.025245 | 0.03567 | -4.83476961 |
| ATF5    | -0.270496691 | 5.6736442  | -2.250104681 | 0.025291 | 0.03574 | -4.83635833 |
| GLCC1   | -0.270054347 | 4.91289796 | -2.24989533  | 0.025305 | 0.03575 | -4.83682011 |
| ADRA1A  | -0.030368484 | 0.08188868 | -2.249795382 | 0.025311 | 0.03576 | -4.83704055 |
| ARPIN-A | -0.06457397  | 0.40790276 | -2.24949746  | 0.02533  | 0.03578 | -4.83769759 |
| AMER2   | -0.080110724 | 0.07040606 | -2.2488659   | 0.025371 | 0.03584 | -4.83909016 |
| ACSM3   | -0.167464239 | 1.24479245 | -2.24844462  | 0.025398 | 0.03587 | -4.84001886 |
| C2CD3   | -0.152737167 | 3.26804682 | -2.247818069 | 0.025439 | 0.03593 | -4.84139976 |
| NR0B2   | -0.184736602 | 0.40369427 | -2.247726316 | 0.025445 | 0.03593 | -4.84160195 |
| TASOR2  | -0.197538927 | 3.86057395 | -2.247703396 | 0.025446 | 0.03593 | -4.84165246 |
| RPH3A   | -0.097245968 | 0.14907698 | -2.247424902 | 0.025464 | 0.03595 | -4.84226611 |
| RBP2    | -0.101338822 | 0.31619446 | -2.247095874 | 0.025485 | 0.03598 | -4.84299101 |
| ATG16L1 | -0.157438353 | 4.21981207 | -2.247061727 | 0.025488 | 0.03598 | -4.84306623 |
| CAPN1   | -0.164443499 | 6.75232246 | -2.246813967 | 0.025504 | 0.036   | -4.84361201 |
| STAT5B  | -0.158698009 | 5.44647245 | -2.245934545 | 0.025561 | 0.03608 | -4.84554878 |
| CYP7A1  | -0.015305535 | 0.04302824 | -2.245629067 | 0.025581 | 0.0361  | -4.84622137 |
| TENT2   | -0.149176359 | 4.85997333 | -2.2453894   | 0.025596 | 0.03612 | -4.846749   |
| MMP1    | 0.256060104  | 1.03143445 | 2.244915203  | 0.025627 | 0.03616 | -4.84779279 |
| HS3ST3  | 0.106380027  | 0.30168887 | 2.24407325   | 0.025682 | 0.03624 | -4.84964554 |
| CFAP73  | -0.128332873 | 0.77985129 | -2.244034701 | 0.025684 | 0.03624 | -4.84973036 |
| MEF2A   | -0.201762966 | 4.3338116  | -2.243441193 | 0.025723 | 0.03629 | -4.85103598 |
| CAMK2A  | 0.044461433  | 0.07748504 | 2.242703883  | 0.025771 | 0.03635 | -4.85265748 |
| NOC3L   | -0.166680613 | 3.95628166 | -2.241264214 | 0.025866 | 0.03648 | -4.85582214 |
| INTS6   | -0.124487191 | 2.43501217 | -2.240044951 | 0.025946 | 0.03659 | -4.85850077 |
| FOXR1   | -0.094815712 | 0.10322996 | -2.239687247 | 0.025969 | 0.03662 | -4.85928636 |
| ANKIB1  | -0.185360994 | 4.35188493 | -2.238629436 | 0.026039 | 0.03672 | -4.8616088  |
| OSTM1   | -0.154930993 | 4.19628942 | -2.238064174 | 0.026076 | 0.03677 | -4.86284941 |
| GUCY1A  | -0.145723155 | 1.09858578 | -2.237943    | 0.026084 | 0.03678 | -4.86311532 |
| KCNC3   | -0.289983684 | 4.02433743 | -2.237522877 | 0.026112 | 0.03681 | -4.86403715 |
| POMK    | 0.224003215  | 1.60167528 | 2.236409637  | 0.026186 | 0.03691 | -4.86647899 |
| RNF151  | -0.035309055 | 0.1109532  | -2.236240089 | 0.026197 | 0.03693 | -4.86685078 |
| ARMCX6  | -0.244932767 | 4.79715045 | -2.235851221 | 0.026223 | 0.03696 | -4.8677034  |
| GRHL2   | -0.20352719  | 4.23425478 | -2.235125452 | 0.026271 | 0.03702 | -4.86929433 |
| LRRC31  | -0.03391915  | 0.06443965 | -2.234747393 | 0.026296 | 0.03706 | -4.87012287 |
| TBK1    | -0.138737664 | 4.03035394 | -2.23338617  | 0.026387 | 0.03718 | -4.87310492 |
| SHISAL1 | 0.121090368  | 0.43273957 | 2.232700314  | 0.026433 | 0.03724 | -4.87460678 |
| SEPTIN1 | 0.228820356  | 4.5131384  | 2.23141764   | 0.026519 | 0.03736 | -4.87741433 |

|          |              |            |              |          |         |             |
|----------|--------------|------------|--------------|----------|---------|-------------|
| TTC14    | -0.230108132 | 3.77922513 | -2.230676574 | 0.026569 | 0.03743 | -4.87903569 |
| OVCH1    | -0.072265467 | 0.18631957 | -2.228853734 | 0.026691 | 0.0376  | -4.88302162 |
| MFSD6L   | -0.30683028  | 3.99415536 | -2.228742452 | 0.026699 | 0.0376  | -4.88326486 |
| MAP4K5   | -0.167647373 | 3.9572738  | -2.227598936 | 0.026776 | 0.03771 | -4.88576362 |
| ADAP1    | -0.169724199 | 2.88346204 | -2.227520159 | 0.026781 | 0.03771 | -4.88593572 |
| MAEL     | -0.090492649 | 0.21448031 | -2.227503381 | 0.026783 | 0.03771 | -4.88597237 |
| SGPP2    | -0.358275822 | 4.23499741 | -2.226612983 | 0.026843 | 0.0378  | -4.88791709 |
| EPDR1    | -0.274218897 | 5.44769002 | -2.22641827  | 0.026856 | 0.03781 | -4.88834227 |
| CAMP     | -0.356168499 | 1.61064462 | -2.225468191 | 0.026921 | 0.0379  | -4.89041635 |
| RNF168   | -0.142782795 | 3.26155658 | -2.224374315 | 0.026995 | 0.038   | -4.89280329 |
| NRTN     | -0.194538518 | 1.09715935 | -2.224201881 | 0.027007 | 0.03801 | -4.89317945 |
| MYO16    | -0.042341123 | 0.07980611 | -2.223302289 | 0.027068 | 0.0381  | -4.89514145 |
| PPP2R3   | 0.164005103  | 2.55583803 | 2.222893983  | 0.027096 | 0.03813 | -4.89603171 |
| TSN      | -0.166965765 | 5.80391516 | -2.222626271 | 0.027114 | 0.03816 | -4.89661534 |
| RNF152   | -0.193517632 | 1.69675796 | -2.222528117 | 0.027121 | 0.03816 | -4.8968293  |
| ME3      | 0.2106206    | 3.77840207 | 2.222089003  | 0.027151 | 0.0382  | -4.89778641 |
| ZNF155   | -0.158597267 | 1.7868095  | -2.221804851 | 0.02717  | 0.03822 | -4.89840566 |
| NFAM1    | -0.261643407 | 2.81986621 | -2.221650451 | 0.027181 | 0.03824 | -4.89874211 |
| GNG4     | -0.12413449  | 0.51593796 | -2.220859663 | 0.027235 | 0.03831 | -4.90046494 |
| ZNF615   | -0.165789926 | 3.00003292 | -2.220384319 | 0.027268 | 0.03835 | -4.90150026 |
| MAP3K1   | 0.155435824  | 2.32192368 | 2.219837126  | 0.027305 | 0.0384  | -4.9026918  |
| SLC5A1C  | -0.028442484 | 0.11732647 | -2.219734843 | 0.027313 | 0.03841 | -4.9029145  |
| SF3B3    | -0.158273515 | 5.21030649 | -2.219424445 | 0.027334 | 0.03844 | -4.90359025 |
| ZWINT    | -0.187217041 | 3.69746838 | -2.219303292 | 0.027342 | 0.03844 | -4.90385399 |
| MRLN     | -0.025842145 | 0.04285416 | -2.219030172 | 0.027361 | 0.03847 | -4.90444847 |
| RSBN1    | -0.163470645 | 3.62647507 | -2.218321606 | 0.02741  | 0.03853 | -4.90599046 |
| NBAS     | -0.18831475  | 4.48146484 | -2.217971125 | 0.027434 | 0.03856 | -4.906753   |
| RPL7A    | -0.153251792 | 10.6856301 | -2.217933862 | 0.027437 | 0.03856 | -4.90683407 |
| EGLN2    | -0.155028785 | 3.58302126 | -2.217779862 | 0.027447 | 0.03858 | -4.90716908 |
| BTBD8    | 0.14908632   | 1.00919207 | 2.217060572  | 0.027497 | 0.03864 | -4.90873355 |
| TNRC6A   | -0.166471603 | 3.71326993 | -2.216630535 | 0.027527 | 0.03868 | -4.90966865 |
| CHST13   | 0.096423526  | 0.49469752 | 2.216289391  | 0.02755  | 0.03871 | -4.91041034 |
| SECISBF  | -0.203408298 | 4.75694748 | -2.216196093 | 0.027557 | 0.03872 | -4.91061316 |
| GAREM2   | -0.157060425 | 2.06638277 | -2.216018297 | 0.027569 | 0.03873 | -4.91099965 |
| CASP3    | -0.15014475  | 4.43583392 | -2.215671017 | 0.027593 | 0.03876 | -4.91175447 |
| ZMYM1    | -0.160682697 | 2.65567891 | -2.215331351 | 0.027617 | 0.03879 | -4.91249263 |
| RNF227   | 0.133357546  | 2.44197006 | 2.21384279   | 0.027721 | 0.03893 | -4.91572629 |
| C19orf38 | 0.170598593  | 1.33429865 | 2.213731695  | 0.027728 | 0.03894 | -4.91596755 |
| TSHZ2    | 0.168584917  | 1.10177832 | 2.213380856  | 0.027753 | 0.03897 | -4.91672935 |
| PPM1K    | -0.161931389 | 3.03917018 | -2.213309257 | 0.027758 | 0.03898 | -4.9168848  |

|          |              |            |              |          |         |             |
|----------|--------------|------------|--------------|----------|---------|-------------|
| ISOC1    | -0.17314806  | 5.45181084 | -2.213114453 | 0.027771 | 0.03899 | -4.91730773 |
| RNF112   | -0.069007341 | 0.40927796 | -2.213047975 | 0.027776 | 0.039   | -4.91745205 |
| OR51E2   | 0.078621395  | 0.23796981 | 2.212546702  | 0.027811 | 0.03904 | -4.91854014 |
| TACR2    | -0.095467163 | 0.50085049 | -2.212384054 | 0.027822 | 0.03905 | -4.91889314 |
| GSTT4    | -0.022203957 | 0.04548381 | -2.212370013 | 0.027823 | 0.03905 | -4.91892361 |
| BMF      | -0.277243644 | 5.05209141 | -2.211529088 | 0.027882 | 0.03913 | -4.92074829 |
| YPEL4    | 0.253329734  | 1.59724004 | 2.211518151  | 0.027883 | 0.03913 | -4.92077202 |
| C11orf91 | 0.057512264  | 0.15844491 | 2.211017324  | 0.027918 | 0.03918 | -4.92185842 |
| RPL17-C  | -0.021598683 | 0.06077538 | -2.21099164  | 0.02792  | 0.03918 | -4.92191413 |
| PPP1CB   | -0.155434905 | 7.15003919 | -2.210342071 | 0.027965 | 0.03924 | -4.92332281 |
| ITIH5    | -0.308993856 | 3.46902874 | -2.210179065 | 0.027977 | 0.03925 | -4.92367625 |
| SLITRK3  | -0.059326016 | 0.13028447 | -2.209086485 | 0.028054 | 0.03935 | -4.92604459 |
| PTGER4   | 0.294535833  | 2.38314979 | 2.209043292  | 0.028057 | 0.03935 | -4.9261382  |
| PTPN11   | -0.20702876  | 5.65603641 | -2.208321794 | 0.028108 | 0.03942 | -4.92770151 |
| PDE1A    | -0.281716541 | 5.06779488 | -2.207073475 | 0.028196 | 0.03954 | -4.93040517 |
| GTF2I    | -0.321285803 | 4.03056214 | -2.206679071 | 0.028224 | 0.03958 | -4.93125908 |
| GAS2L2   | -0.184307174 | 0.65818478 | -2.206374611 | 0.028245 | 0.03961 | -4.93191815 |
| MKRN2C   | 0.27282272   | 1.72916741 | 2.205966432  | 0.028274 | 0.03964 | -4.93280162 |
| C19orf57 | 0.110743297  | 1.19513586 | 2.20498853   | 0.028344 | 0.03974 | -4.93491754 |
| TENM3    | 0.326680561  | 2.16320913 | 2.204487816  | 0.028379 | 0.03978 | -4.93600061 |
| ENHO     | -0.157688085 | 0.97600059 | -2.204082162 | 0.028408 | 0.03982 | -4.93687788 |
| RGL3     | -0.230448591 | 6.1736524  | -2.203914808 | 0.02842  | 0.03983 | -4.93723976 |
| BCL2L12  | -0.134637956 | 3.62456147 | -2.203889103 | 0.028422 | 0.03983 | -4.93729534 |
| MYO19    | -0.137688099 | 2.63839196 | -2.203252693 | 0.028467 | 0.03989 | -4.93867122 |
| SPC24    | 0.164004571  | 1.69128969 | 2.202392475  | 0.028529 | 0.03998 | -4.94053035 |
| ARHGAP   | 0.284685091  | 3.29664629 | 2.202156395  | 0.028545 | 0.04    | -4.94104045 |
| NIPAL3   | -0.196047936 | 5.55768961 | -2.20048256  | 0.028665 | 0.04016 | -4.94465562 |
| EYA4     | -0.241969949 | 0.74448769 | -2.199362729 | 0.028746 | 0.04027 | -4.94707277 |
| SLC24A2  | 0.055511243  | 0.09676396 | 2.199272952  | 0.028752 | 0.04028 | -4.9472665  |
| KLHL28   | -0.170211757 | 2.60914998 | -2.199036147 | 0.028769 | 0.0403  | -4.94777747 |
| DACT2    | -0.190627153 | 0.37285433 | -2.197105    | 0.028909 | 0.04049 | -4.95194247 |
| CPT1B    | 0.175735463  | 1.46969593 | 2.196543408  | 0.028949 | 0.04054 | -4.95315301 |
| ADNP2    | -0.174431242 | 3.62451925 | -2.194106192 | 0.029126 | 0.04079 | -4.95840314 |
| RHBDF1   | 0.185783805  | 4.83981368 | 2.194081457  | 0.029128 | 0.04079 | -4.9584564  |
| STAT5A   | 0.160748266  | 4.49503566 | 2.193925119  | 0.029139 | 0.0408  | -4.95879298 |
| REXO2    | -0.150533839 | 4.5139399  | -2.193685402 | 0.029157 | 0.04082 | -4.95930902 |
| PLEKHA7  | 0.196241296  | 3.39481478 | 2.193133697  | 0.029197 | 0.04087 | -4.96049648 |
| IFI30    | 0.110586886  | 1.03086553 | 2.193084779  | 0.0292   | 0.04087 | -4.96060175 |
| GRIA4    | -0.026171888 | 0.04652358 | -2.192336607 | 0.029255 | 0.04095 | -4.96221158 |
| GCSAM    | -0.195594753 | 1.48944687 | -2.191903221 | 0.029287 | 0.04099 | -4.96314384 |

|         |              |            |              |          |         |             |
|---------|--------------|------------|--------------|----------|---------|-------------|
| WNT8B   | 0.021875929  | 0.07071011 | 2.191431631  | 0.029321 | 0.04103 | -4.96415809 |
| CANT1   | -0.182241013 | 5.2611051  | -2.19089405  | 0.02936  | 0.04108 | -4.96531401 |
| THAP8   | -0.117219242 | 3.84454194 | -2.190238818 | 0.029408 | 0.04115 | -4.96672253 |
| ACTR2   | -0.179051968 | 6.9274249  | -2.189416427 | 0.029469 | 0.04123 | -4.96848981 |
| IL1RL2  | 0.234554595  | 3.10635966 | 2.187485975  | 0.029611 | 0.04142 | -4.97263575 |
| NSMAF   | -0.132711187 | 4.24421725 | -2.187391767 | 0.029618 | 0.04143 | -4.97283799 |
| PHIP    | 0.163824805  | 3.70086407 | 2.186564556  | 0.029679 | 0.04151 | -4.9746134  |
| ANKRA2  | -0.161992598 | 4.61878053 | -2.18642582  | 0.029689 | 0.04152 | -4.9749111  |
| CDT1    | 0.233132235  | 3.15625699 | 2.185831324  | 0.029733 | 0.04158 | -4.97618657 |
| TANC1   | 0.242114488  | 3.94383829 | 2.185543376  | 0.029755 | 0.04161 | -4.97680423 |
| PRLHR   | -0.187607688 | 0.19232944 | -2.185365984 | 0.029768 | 0.04162 | -4.9771847  |
| ANKRD3  | 0.096488538  | 0.19973124 | 2.185197802  | 0.02978  | 0.04164 | -4.9775454  |
| TMEM54  | -0.180772941 | 6.81804147 | -2.185178424 | 0.029782 | 0.04164 | -4.97758695 |
| TYK2    | -0.126011627 | 4.89333517 | -2.184747704 | 0.029814 | 0.04168 | -4.97851057 |
| NTN5    | -0.168880482 | 0.89095753 | -2.184680722 | 0.029819 | 0.04168 | -4.97865419 |
| BTBD19  | -0.252861381 | 3.25378975 | -2.184668315 | 0.02982  | 0.04168 | -4.97868079 |
| EVPL    | 0.253574419  | 5.44560054 | 2.184501622  | 0.029832 | 0.04169 | -4.97903818 |
| CD226   | 0.103073296  | 0.42055007 | 2.184060395  | 0.029865 | 0.04173 | -4.97998404 |
| OTX1    | -0.101353191 | 0.18334073 | -2.183435484 | 0.029911 | 0.0418  | -4.98132336 |
| RINL    | -0.20750967  | 4.05817043 | -2.182916052 | 0.02995  | 0.04185 | -4.98243633 |
| DGCR6   | -0.34007133  | 3.07601641 | -2.182890443 | 0.029952 | 0.04185 | -4.98249119 |
| TRNAU1  | -0.117334352 | 3.40122738 | -2.182419343 | 0.029987 | 0.04189 | -4.98350037 |
| SAMD4B  | -0.128981895 | 5.37404493 | -2.181741934 | 0.030038 | 0.04196 | -4.98495113 |
| SHROOM  | -0.158580968 | 3.32819826 | -2.180077089 | 0.030162 | 0.04213 | -4.98851478 |
| HACD2   | -0.196177425 | 4.40291092 | -2.179759012 | 0.030186 | 0.04216 | -4.98919533 |
| EIF1AD  | -0.114498643 | 4.60972021 | -2.178481532 | 0.030282 | 0.04229 | -4.99192765 |
| SCAF4   | -0.125546232 | 4.07070109 | -2.17828563  | 0.030297 | 0.04231 | -4.99234651 |
| TMEM16  | -0.256907245 | 1.98873249 | -2.176440845 | 0.030436 | 0.0425  | -4.99628913 |
| INSM2   | 0.018944123  | 0.0308155  | 2.176345636  | 0.030443 | 0.0425  | -4.99649252 |
| MAPKAP  | 0.161376919  | 6.9733622  | 2.176034232  | 0.030467 | 0.04253 | -4.9971577  |
| PLXNA1  | 0.187363403  | 3.6669255  | 2.175995561  | 0.03047  | 0.04253 | -4.9972403  |
| EDIL3   | -0.243933287 | 3.18497548 | -2.174920524 | 0.030551 | 0.04264 | -4.9995359  |
| TMEM13  | 0.39116806   | 1.69301197 | 2.174631089  | 0.030573 | 0.04267 | -5.00015376 |
| PLA2G5  | 0.305186085  | 1.41185392 | 2.174244088  | 0.030602 | 0.04271 | -5.00097978 |
| TRIO    | 0.17856289   | 2.75177298 | 2.174096307  | 0.030613 | 0.04272 | -5.00129517 |
| VSNL1   | 0.17315585   | 0.49826368 | 2.174086731  | 0.030614 | 0.04272 | -5.0013156  |
| CRYGS   | -0.188644579 | 1.85063192 | -2.173722351 | 0.030642 | 0.04275 | -5.00209315 |
| CLEC18E | -0.048159623 | 0.16269651 | -2.172878426 | 0.030706 | 0.04284 | -5.00389352 |
| SLC35C1 | -0.141699912 | 4.24423539 | -2.172270996 | 0.030752 | 0.0429  | -5.00518895 |
| CHRNA5  | -0.050705924 | 0.29371038 | -2.171901626 | 0.030781 | 0.04294 | -5.00597652 |

|         |              |            |              |          |         |             |
|---------|--------------|------------|--------------|----------|---------|-------------|
| LRIF1   | -0.135924788 | 3.79377768 | -2.17167077  | 0.030798 | 0.04296 | -5.00646868 |
| ANK1    | 0.062331236  | 0.26401101 | 2.170289834  | 0.030904 | 0.0431  | -5.00941164 |
| LPAR4   | 0.042955709  | 0.20802168 | 2.169321917  | 0.030978 | 0.0432  | -5.01147332 |
| RSF1    | -0.173715731 | 3.65222372 | -2.169266923 | 0.030982 | 0.0432  | -5.01159043 |
| INMT    | 0.506267338  | 4.03568379 | 2.169146734  | 0.030991 | 0.04321 | -5.01184637 |
| DOT1L   | -0.141334477 | 2.69803933 | -2.168428952 | 0.031047 | 0.04329 | -5.01337457 |
| PCDH18  | 0.2353552    | 2.38496212 | 2.167882954  | 0.031089 | 0.04334 | -5.01453671 |
| SPATA2  | -0.062401387 | 0.06463128 | -2.167608267 | 0.03111  | 0.04337 | -5.01512126 |
| MIIP    | -0.168287086 | 5.26636206 | -2.166200256 | 0.031218 | 0.04352 | -5.01811649 |
| CNTN4   | 0.264219207  | 2.78832965 | 2.165775689  | 0.031251 | 0.04356 | -5.01901929 |
| KCTD19  | -0.031125359 | 0.0748179  | -2.16530206  | 0.031288 | 0.0436  | -5.02002622 |
| YWHAZ   | -0.141964177 | 7.61628471 | -2.164865374 | 0.031321 | 0.04365 | -5.02095442 |
| TBL1X   | -0.166601036 | 3.94105193 | -2.16386845  | 0.031399 | 0.04375 | -5.02307276 |
| CPNE1   | -0.149576955 | 6.6324267  | -2.16380673  | 0.031404 | 0.04376 | -5.02320388 |
| ALK     | 0.271293015  | 1.13705958 | 2.16270971   | 0.031489 | 0.04387 | -5.02553376 |
| SLC18A1 | 0.024253151  | 0.05775178 | 2.161918054  | 0.031551 | 0.04395 | -5.02721439 |
| PANX2   | -0.216045068 | 3.21287321 | -2.161881441 | 0.031553 | 0.04395 | -5.02729211 |
| SLC26A1 | -0.036012612 | 0.13567105 | -2.160786354 | 0.031639 | 0.04407 | -5.02961589 |
| LMTK3   | 0.215791653  | 3.01295916 | 2.160669215  | 0.031648 | 0.04408 | -5.02986439 |
| RIMBP3  | -0.012927286 | 0.03137042 | -2.160160212 | 0.031688 | 0.04413 | -5.03094405 |
| SYNE3   | -0.146598946 | 1.63391741 | -2.158198925 | 0.031842 | 0.04434 | -5.03510192 |
| TRPC5   | 0.462565706  | 1.80630001 | 2.158041854  | 0.031854 | 0.04435 | -5.03543474 |
| THEM5   | 0.354597719  | 2.25850891 | 2.156445008  | 0.03198  | 0.04453 | -5.03881708 |
| SLC25A4 | 0.169158048  | 3.0451616  | 2.155759125  | 0.032034 | 0.0446  | -5.04026913 |
| GNAQ    | -0.164007862 | 5.64210306 | -2.154092232 | 0.032166 | 0.04478 | -5.04379617 |
| TRIM36  | -0.354189575 | 1.3722522  | -2.153432162 | 0.032218 | 0.04485 | -5.04519211 |
| PFAS    | -0.145136551 | 3.35841817 | -2.153404399 | 0.03222  | 0.04485 | -5.04525082 |
| TEN1-CC | -0.125469726 | 1.02050967 | -2.152081538 | 0.032325 | 0.04499 | -5.04804718 |
| GINS2   | -0.193686304 | 3.00374911 | -2.151830181 | 0.032345 | 0.04501 | -5.04857833 |
| TMEM97  | -0.176679772 | 2.85687887 | -2.150027523 | 0.032489 | 0.04521 | -5.05238582 |
| ZNF845  | -0.143545235 | 2.34562114 | -2.149790346 | 0.032508 | 0.04523 | -5.05288655 |
| EFNB1   | -0.18224912  | 5.20331397 | -2.149434669 | 0.032537 | 0.04527 | -5.05363735 |
| RIT1    | -0.135953069 | 4.36251342 | -2.149098313 | 0.032564 | 0.0453  | -5.05434725 |
| MMP24   | 0.140946767  | 1.06787383 | 2.148448849  | 0.032616 | 0.04537 | -5.0557177  |
| BTBD9   | -0.124792735 | 3.37803804 | -2.148329203 | 0.032625 | 0.04538 | -5.05597012 |
| CNOT1   | -0.225752741 | 4.97151738 | -2.14789333  | 0.03266  | 0.04542 | -5.05688959 |
| SAPCD1  | 0.08141358   | 0.42329479 | 2.147764372  | 0.032671 | 0.04544 | -5.05716159 |
| ZNF470  | -0.133764378 | 2.28485879 | -2.146428192 | 0.032778 | 0.04558 | -5.05997896 |
| XAB2    | -0.134648965 | 5.81356315 | -2.146325398 | 0.032786 | 0.04559 | -5.06019563 |
| EVL     | -0.152695314 | 3.81170683 | -2.146279551 | 0.03279  | 0.04559 | -5.06029227 |

|         |              |            |              |          |         |             |
|---------|--------------|------------|--------------|----------|---------|-------------|
| ZNF93   | -0.140188568 | 2.33404499 | -2.145702019 | 0.032837 | 0.04565 | -5.0615094  |
| ZNF649  | -0.173950131 | 3.38012613 | -2.145458188 | 0.032856 | 0.04567 | -5.06202318 |
| DYNLT3  | -0.148262843 | 4.90021717 | -2.145298911 | 0.032869 | 0.04569 | -5.06235876 |
| SPOCK3  | 0.155193361  | 0.26764417 | 2.144389582  | 0.032943 | 0.04579 | -5.06427416 |
| ATXN2   | -0.117011974 | 3.28442392 | -2.143120271 | 0.033045 | 0.04593 | -5.06694652 |
| MAN2B1  | 0.178766515  | 4.87737096 | 2.142694388  | 0.03308  | 0.04597 | -5.06784281 |
| LMTK2   | -0.16690172  | 3.81478725 | -2.142686578 | 0.033081 | 0.04597 | -5.06785925 |
| RRM2B   | -0.186095002 | 5.85783373 | -2.14257031  | 0.03309  | 0.04598 | -5.06810391 |
| IGSF9B  | -0.150514916 | 1.19722368 | -2.142352373 | 0.033108 | 0.046   | -5.06856248 |
| TMEM8A  | -0.141808505 | 6.08299304 | -2.142272932 | 0.033114 | 0.046   | -5.06872962 |
| FTL     | -0.165972894 | 12.3854569 | -2.14190618  | 0.033144 | 0.04604 | -5.06950119 |
| TNRC6C  | -0.131675782 | 2.77620767 | -2.141433235 | 0.033183 | 0.04609 | -5.07049597 |
| GNAO1   | 0.254280031  | 2.10616671 | 2.141343178  | 0.03319  | 0.0461  | -5.07068537 |
| F7      | 0.102075158  | 0.35230387 | 2.140394574  | 0.033267 | 0.0462  | -5.07267993 |
| TMEM17  | -0.108313379 | 0.28111159 | -2.139232862 | 0.033362 | 0.04633 | -5.07512142 |
| SGPP1   | -0.173750689 | 4.71401467 | -2.139053873 | 0.033377 | 0.04634 | -5.07549747 |
| PRDM2   | -0.175492086 | 4.12637066 | -2.139052108 | 0.033377 | 0.04634 | -5.07550118 |
| CLCN7   | -0.151327818 | 5.08188015 | -2.138088083 | 0.033456 | 0.04645 | -5.07752606 |
| C4BPB   | -0.026406338 | 0.07744714 | -2.137991371 | 0.033464 | 0.04645 | -5.07772915 |
| TPTE2   | 0.059881883  | 0.1719825  | 2.137842453  | 0.033476 | 0.04646 | -5.07804185 |
| EQTN    | -0.031922794 | 0.11023849 | -2.137833471 | 0.033477 | 0.04646 | -5.07806071 |
| PRSS1   | 0.410236833  | 1.34207181 | 2.136885353  | 0.033555 | 0.04657 | -5.0800511  |
| CDC14A  | -0.209315297 | 3.17098857 | -2.135610833 | 0.03366  | 0.04671 | -5.08272536 |
| MYEF2   | 0.184282331  | 2.3890791  | 2.135473535  | 0.033671 | 0.04672 | -5.08301335 |
| USP3    | -0.130108229 | 3.52573416 | -2.134111487 | 0.033783 | 0.04687 | -5.08586938 |
| ZSWIM8  | -0.162455768 | 4.80009098 | -2.134071932 | 0.033787 | 0.04688 | -5.0859523  |
| MSMB    | 0.298542938  | 0.63987772 | 2.13371599   | 0.033816 | 0.04691 | -5.08669836 |
| SMIM11A | -0.012676182 | 0.02983415 | -2.13352195  | 0.033832 | 0.04693 | -5.08710502 |
| TMEM15  | 0.200832984  | 0.99105234 | 2.132985755  | 0.033876 | 0.04699 | -5.08822857 |
| GRIK2   | -0.270815589 | 1.0947583  | -2.132818792 | 0.03389  | 0.047   | -5.08857837 |
| MOV10   | 0.133107566  | 4.42206134 | 2.132457766  | 0.03392  | 0.04704 | -5.08933465 |
| FAM180A | 0.168377827  | 0.6173117  | 2.131330935  | 0.034014 | 0.04716 | -5.09169437 |
| DVL3    | -0.125248874 | 5.58111487 | -2.131327658 | 0.034014 | 0.04716 | -5.09170123 |
| BHMT    | -0.091137627 | 0.33069402 | -2.130614077 | 0.034074 | 0.04724 | -5.09319494 |
| GPC5    | 0.196701132  | 0.70731062 | 2.130173021  | 0.03411  | 0.04729 | -5.09411793 |
| COL15A1 | -0.278472457 | 4.99129016 | -2.1298606   | 0.034136 | 0.04732 | -5.09477162 |
| RRAGC   | -0.118981619 | 3.87263631 | -2.129723017 | 0.034148 | 0.04733 | -5.09505947 |
| NUP205  | -0.165638991 | 3.9555514  | -2.128729424 | 0.034231 | 0.04745 | -5.09713765 |
| IHH     | -0.156802774 | 0.11629086 | -2.128080392 | 0.034285 | 0.04752 | -5.09849466 |
| ALDH1A1 | -0.113903616 | 0.42981038 | -2.127789425 | 0.034309 | 0.04755 | -5.09910289 |

|          |              |            |              |          |         |             |
|----------|--------------|------------|--------------|----------|---------|-------------|
| NUP155   | -0.142655897 | 3.01162521 | -2.127761465 | 0.034312 | 0.04755 | -5.09916133 |
| CTTNBP   | 0.302573053  | 2.31706637 | 2.126484682  | 0.034419 | 0.04769 | -5.10182929 |
| C19orf18 | -0.17403841  | 1.8709001  | -2.126301343 | 0.034434 | 0.04771 | -5.10221227 |
| STAG2    | -0.172220234 | 5.5068304  | -2.126071408 | 0.034454 | 0.04773 | -5.10269254 |
| SETD1B   | -0.152580788 | 4.05815336 | -2.124916852 | 0.034551 | 0.04786 | -5.10510331 |
| KLKB1    | -0.155177854 | 1.06205999 | -2.123666155 | 0.034656 | 0.048   | -5.10771341 |
| RHBDL2   | -0.121282364 | 1.44908512 | -2.123272848 | 0.03469  | 0.04805 | -5.1085339  |
| MICA     | -0.153217696 | 4.81475764 | -2.122969257 | 0.034715 | 0.04808 | -5.10916713 |
| C3orf67  | -0.072212401 | 0.34353964 | -2.122194581 | 0.034781 | 0.04816 | -5.11078255 |
| KCTD20   | -0.151469015 | 4.49719233 | -2.122105108 | 0.034789 | 0.04817 | -5.11096909 |
| TMEM10   | -0.308293971 | 2.73557994 | -2.121665384 | 0.034826 | 0.04822 | -5.11188576 |
| KLHL5    | -0.177128455 | 3.66619638 | -2.12094478  | 0.034887 | 0.0483  | -5.11338755 |
| PCNX2    | 0.243866819  | 2.97224923 | 2.120032746  | 0.034965 | 0.0484  | -5.1152876  |
| C4B      | 0.348495411  | 4.47941324 | 2.120005761  | 0.034967 | 0.0484  | -5.1153438  |
| CNIH4    | -0.114831833 | 4.27831038 | -2.119820256 | 0.034983 | 0.04842 | -5.11573017 |
| LCA5     | 0.245767816  | 3.63603262 | 2.119682537  | 0.034995 | 0.04843 | -5.11601698 |
| PPAT     | -0.135995153 | 2.6257546  | -2.118871581 | 0.035064 | 0.04852 | -5.11770552 |
| ATIC     | 0.185076916  | 5.77653026 | 2.118479516  | 0.035097 | 0.04857 | -5.11852164 |
| RAB37    | -0.145665255 | 1.00225086 | -2.118209835 | 0.03512  | 0.04859 | -5.11908292 |
| FAM214E  | -0.117376605 | 3.72487857 | -2.117988325 | 0.035139 | 0.04862 | -5.11954389 |
| PHLDB1   | -0.182543473 | 3.3732118  | -2.117750484 | 0.035159 | 0.04864 | -5.12003879 |
| TNFRSF   | 0.27854212   | 3.72545662 | 2.117527559  | 0.035179 | 0.04866 | -5.12050261 |
| CDC42E1  | -0.168412583 | 5.71111256 | -2.116258565 | 0.035287 | 0.04881 | -5.12314199 |
| ZNF232   | -0.153681437 | 3.24992569 | -2.116065944 | 0.035304 | 0.04883 | -5.12354248 |
| DTNA     | -0.238745496 | 3.25370153 | -2.114603049 | 0.03543  | 0.049   | -5.12658299 |
| CASTOR   | 0.22733104   | 2.81118077 | 2.114296329  | 0.035456 | 0.04903 | -5.12722022 |
| LGR6     | -0.328100106 | 2.66569358 | -2.114163274 | 0.035468 | 0.04904 | -5.12749663 |
| JAG1     | -0.208815655 | 4.64822474 | -2.11411776  | 0.035472 | 0.04904 | -5.12759117 |
| XKR6     | -0.135667986 | 1.54062855 | -2.113896525 | 0.035491 | 0.04907 | -5.12805071 |
| C6orf15  | 0.074601019  | 0.19048488 | 2.113508534  | 0.035524 | 0.04911 | -5.12885652 |
| TM4SF1   | -0.133029077 | 0.49657257 | 2.113446578  | 0.035529 | 0.04911 | -5.12898518 |
| TTLL10   | 0.078723234  | 0.34357897 | 2.113349709  | 0.035538 | 0.04912 | -5.12918634 |
| EIF4B    | -0.174421248 | 7.67395785 | -2.113218607 | 0.035549 | 0.04913 | -5.12945857 |
| RCL1     | -0.116440691 | 2.89482938 | -2.113090712 | 0.03556  | 0.04914 | -5.12972412 |
| MB21D2   | -0.143559967 | 2.62237763 | -2.113025871 | 0.035566 | 0.04915 | -5.12985875 |
| ATG9B    | 0.11962528   | 0.62788184 | 2.112825703  | 0.035583 | 0.04917 | -5.13027432 |
| ST5      | -0.179071122 | 4.26210101 | -2.11256983  | 0.035605 | 0.04919 | -5.13080549 |
| SREBF1   | 0.203840692  | 5.57953939 | 2.110656843  | 0.035771 | 0.04942 | -5.13477473 |
| ROCK2    | -0.170637495 | 3.59055625 | -2.110579109 | 0.035778 | 0.04942 | -5.13493594 |
| MEP1A    | 0.032557707  | 0.07859339 | 2.109868648  | 0.035839 | 0.04951 | -5.13640913 |

|         |              |            |              |          |         |             |
|---------|--------------|------------|--------------|----------|---------|-------------|
| AWAT1   | 0.044855791  | 0.10238757 | 2.109423534  | 0.035878 | 0.04955 | -5.13733186 |
| ABCA2   | -0.219123422 | 5.45013118 | -2.109253977 | 0.035893 | 0.04957 | -5.13768331 |
| WNT16   | 0.093148311  | 0.18017612 | 2.108624335  | 0.035948 | 0.04964 | -5.13898814 |
| TRHDE   | 0.021181629  | 0.03643297 | 2.108091049  | 0.035994 | 0.0497  | -5.14009301 |
| KLHL17  | 0.15339187   | 2.44944122 | 2.107825798  | 0.036018 | 0.04973 | -5.14064245 |
| RNF24   | 0.203623128  | 4.52634573 | 2.107142272  | 0.036077 | 0.04981 | -5.14205801 |
| RAPH1   | 0.204170791  | 1.41757245 | 2.1066148    | 0.036123 | 0.04987 | -5.14315009 |
| RUFY3   | -0.163107366 | 4.42857058 | -2.106490994 | 0.036134 | 0.04988 | -5.14340638 |
| HMCN1   | 0.159652016  | 1.14218194 | 2.105993115  | 0.036178 | 0.04994 | -5.14443688 |
| CAVIN1  | 0.198713197  | 8.11809823 | 2.105812394  | 0.036194 | 0.04995 | -5.14481088 |
| IGSF21  | 0.180525669  | 1.25414144 | 2.103865804  | 0.036365 | 0.05019 | -5.14883731 |
| ZFP28   | -0.112825063 | 2.3288868  | -2.103441797 | 0.036402 | 0.05023 | -5.14971388 |
| XRRA1   | -0.170170836 | 2.32575801 | -2.103105507 | 0.036432 | 0.05027 | -5.15040898 |
| LMO7    | 0.221633066  | 4.9584017  | 2.101723475  | 0.036554 | 0.05043 | -5.15326447 |
| PLCXD1  | -0.149622254 | 2.22941161 | -2.101627868 | 0.036562 | 0.05044 | -5.15346195 |
| RBM12B  | -0.155174077 | 2.72268352 | -2.101117309 | 0.036608 | 0.0505  | -5.15451634 |
| ZNF385A | -0.138438305 | 6.26754504 | -2.100114116 | 0.036697 | 0.05062 | -5.15658738 |
| SFSWAF  | -0.117112539 | 3.65397799 | -2.100066958 | 0.036701 | 0.05062 | -5.15668471 |
| SOCS5   | -0.167521864 | 3.92073427 | -2.099727959 | 0.036731 | 0.05066 | -5.15738432 |
| TDRD5   | -0.119678304 | 0.6785654  | -2.099667828 | 0.036736 | 0.05066 | -5.15750841 |
| ANKRD5  | -0.160626362 | 4.02462085 | -2.099360195 | 0.036764 | 0.05069 | -5.15814318 |
| PKMYT1  | 0.131910723  | 1.14526636 | 2.099202707  | 0.036778 | 0.05071 | -5.15846811 |
| XRCC3   | -0.130496405 | 2.13745357 | -2.09841801  | 0.036847 | 0.0508  | -5.16008673 |
| PLA2G2f | 0.012522473  | 0.01762744 | 2.098332292  | 0.036855 | 0.05081 | -5.16026351 |
| TRIM8   | -0.124643521 | 7.56273757 | -2.097472216 | 0.036932 | 0.05091 | -5.16203687 |
| COL6A2  | 0.287117895  | 6.58797928 | 2.097279041  | 0.036949 | 0.05093 | -5.16243508 |
| MRAP    | -0.103908455 | 0.1577036  | -2.095552212 | 0.037103 | 0.05114 | -5.16599314 |
| SEMA3F  | -0.205972469 | 5.7927657  | -2.095486258 | 0.037109 | 0.05114 | -5.16612898 |
| WFDC10  | 0.054945832  | 0.14424504 | 2.095231153  | 0.037132 | 0.05117 | -5.16665436 |
| SMIM13  | -0.123056733 | 2.7259416  | -2.095081879 | 0.037146 | 0.05118 | -5.16696175 |
| CORO7   | -0.128650164 | 2.12211515 | -2.094489554 | 0.037199 | 0.05125 | -5.1681813  |
| NAA16   | -0.135841721 | 2.72256365 | -2.094252791 | 0.03722  | 0.05128 | -5.16866868 |
| SPACA4  | 0.029937604  | 0.08216692 | 2.093950776  | 0.037247 | 0.05131 | -5.16929031 |
| PGAP1   | -0.188073824 | 2.34236955 | -2.093926702 | 0.037249 | 0.05131 | -5.16933985 |
| PRICKLE | -0.115993552 | 3.12786395 | -2.093742642 | 0.037266 | 0.05133 | -5.16971865 |
| CCDC14  | 0.041214691  | 0.08850303 | 2.093309827  | 0.037305 | 0.05138 | -5.17060926 |
| FBXO45  | -0.113025385 | 2.82371951 | -2.091639943 | 0.037455 | 0.05158 | -5.17404374 |
| TEAD3   | 0.194523589  | 4.88205845 | 2.091297974  | 0.037486 | 0.05162 | -5.17474675 |
| PLEKHS  | 0.125382602  | 0.23061234 | 2.091134168  | 0.037501 | 0.05164 | -5.17508346 |
| YAP1    | -0.219090761 | 6.30584069 | -2.090644272 | 0.037545 | 0.05169 | -5.1760903  |



|          |              |            |              |          |         |             |
|----------|--------------|------------|--------------|----------|---------|-------------|
| MAB21L   | -0.029138382 | 0.06882055 | -2.089919657 | 0.037611 | 0.05178 | -5.17757912 |
| MCMBP    | -0.139318191 | 4.84588052 | -2.089603192 | 0.03764  | 0.05181 | -5.17822918 |
| FGD4     | -0.154271106 | 2.68803053 | -2.08947825  | 0.037651 | 0.05183 | -5.1784858  |
| MROH1    | -0.140909432 | 5.12231101 | -2.089380792 | 0.03766  | 0.05183 | -5.17868596 |
| NHLRC4   | -0.188356351 | 1.22415502 | -2.088170783 | 0.03777  | 0.05198 | -5.18117036 |
| CCDC85   | -0.249451745 | 1.75331362 | -2.087841385 | 0.0378   | 0.05202 | -5.18184644 |
| ANGEL1   | -0.149982655 | 3.72544297 | -2.086612471 | 0.037912 | 0.05217 | -5.18436785 |
| TPH1     | -0.132377993 | 0.64376573 | -2.084568967 | 0.038099 | 0.05242 | -5.1885574  |
| JMJD7-P  | -0.203536589 | 1.55113259 | -2.084055866 | 0.038146 | 0.05248 | -5.18960872 |
| BAHD1    | -0.171669263 | 5.48126869 | -2.083252453 | 0.03822  | 0.05258 | -5.19125438 |
| MTFR2    | 0.083832298  | 0.71517688 | 2.0832301    | 0.038222 | 0.05258 | -5.19130016 |
| HOXA1    | 0.048321765  | 0.22766093 | 2.083011667  | 0.038242 | 0.0526  | -5.19174748 |
| ZNF84    | -0.135200084 | 3.61958197 | -2.081766832 | 0.038356 | 0.05275 | -5.19429582 |
| MCM5     | 0.158628519  | 4.1193608  | 2.081689955  | 0.038364 | 0.05276 | -5.19445315 |
| GMIP     | -0.128965109 | 4.05851366 | -2.081658403 | 0.038366 | 0.05276 | -5.19451772 |
| LARP1B   | -0.142647092 | 2.97224315 | -2.081302522 | 0.038399 | 0.0528  | -5.19524595 |
| ACY3     | 0.158949879  | 0.72534245 | 2.081117514  | 0.038416 | 0.05282 | -5.19562448 |
| CCL2     | 0.353161692  | 3.79294861 | 2.080711     | 0.038454 | 0.05287 | -5.1964561  |
| GJB5     | -0.199900955 | 1.19531449 | -2.080546699 | 0.038469 | 0.05288 | -5.19679218 |
| PTK2B    | 0.227153048  | 4.99727338 | 2.080172325  | 0.038504 | 0.05293 | -5.19755785 |
| SIK1     | 0.257464012  | 0.81594641 | 2.080131914  | 0.038507 | 0.05293 | -5.19764049 |
| CCDC12   | -0.110285077 | 2.7743281  | -2.079566668 | 0.03856  | 0.053   | -5.19879626 |
| NKX3-1   | -0.150548275 | 1.14330334 | -2.079210579 | 0.038593 | 0.05304 | -5.19952421 |
| C4BPA    | -0.097391067 | 0.21954523 | -2.078780339 | 0.038633 | 0.05309 | -5.20040358 |
| ZBTB41   | -0.167018513 | 3.3277004  | -2.078492291 | 0.038659 | 0.05312 | -5.20099223 |
| PANO1    | -0.102986911 | 0.9244518  | -2.07803945  | 0.038701 | 0.05317 | -5.20191748 |
| E2F7     | 0.064776191  | 0.40768045 | 2.077082314  | 0.03879  | 0.05329 | -5.20387248 |
| C12orf49 | 0.253456263  | 6.46415605 | 2.076836988  | 0.038813 | 0.05332 | -5.20437343 |
| NFATC4   | 0.227208027  | 3.99673554 | 2.075754217  | 0.038914 | 0.05345 | -5.20658374 |
| KNL1     | 0.084002338  | 0.65762095 | 2.075651226  | 0.038924 | 0.05346 | -5.20679392 |
| RPS9     | -0.163437029 | 9.12396678 | -2.075158942 | 0.03897  | 0.05352 | -5.20779843 |
| ARNT     | -0.14482442  | 4.62776772 | -2.074111236 | 0.039068 | 0.05365 | -5.2099355  |
| IL12B    | 0.072002503  | 0.15964894 | 2.073626     | 0.039113 | 0.05371 | -5.21092492 |
| PINLYP   | -0.253448422 | 2.45317595 | -2.072697752 | 0.0392   | 0.05382 | -5.21281703 |
| FGD2     | -0.224407018 | 1.46652497 | -2.072597573 | 0.03921  | 0.05383 | -5.21302118 |
| SLC26A2  | 0.189161866  | 3.14461091 | 2.071689433  | 0.039295 | 0.05394 | -5.21487143 |
| KLRG2    | -0.31441009  | 3.15442176 | -2.07148516  | 0.039314 | 0.05397 | -5.2152875  |
| MLLT10   | -0.182782913 | 4.10313796 | -2.071013386 | 0.039359 | 0.05402 | -5.21624829 |
| SIRT6    | -0.122367595 | 4.53392368 | -2.070747886 | 0.039384 | 0.05405 | -5.2167889  |
| SMC3     | -0.19059656  | 5.27098622 | -2.069316948 | 0.039519 | 0.05423 | -5.21970143 |

|         |              |            |              |          |         |             |
|---------|--------------|------------|--------------|----------|---------|-------------|
| TSSK3   | -0.104346142 | 0.64852882 | -2.068803015 | 0.039568 | 0.0543  | -5.22074701 |
| CHM     | -0.190370183 | 3.23880769 | -2.067930685 | 0.03965  | 0.05441 | -5.22252116 |
| ZC3H6   | -0.131678482 | 2.71018113 | -2.067598438 | 0.039682 | 0.05444 | -5.22319669 |
| EPHA3   | -0.233150859 | 2.13776699 | -2.06678149  | 0.039759 | 0.05455 | -5.22485729 |
| SLC2A5  | 0.16370768   | 0.70281879 | 2.066094545  | 0.039825 | 0.05463 | -5.22625315 |
| IGSF23  | -0.019925226 | 0.0489924  | -2.065774846 | 0.039855 | 0.05467 | -5.22690262 |
| UGGT2   | -0.135282422 | 3.37181559 | -2.065398204 | 0.039891 | 0.05471 | -5.22766764 |
| ZSCAN2  | -0.104497091 | 1.27857955 | -2.064107926 | 0.040014 | 0.05488 | -5.23028738 |
| APOF    | -0.024043319 | 0.07266542 | -2.064059917 | 0.040019 | 0.05488 | -5.23038483 |
| DDX47   | 0.12921136   | 1.32849286 | 2.062988398  | 0.040121 | 0.05502 | -5.23255916 |
| ABHD3   | 0.187543972  | 4.51067005 | 2.062871934  | 0.040133 | 0.05503 | -5.23279542 |
| ARL13B  | 0.220731156  | 4.09264771 | 2.062836184  | 0.040136 | 0.05503 | -5.23286794 |
| FAM222E | -0.129079265 | 4.34026203 | -2.062673282 | 0.040152 | 0.05504 | -5.23319839 |
| INTS6L  | 0.17388349   | 2.1639384  | 2.061847765  | 0.040231 | 0.05515 | -5.23487253 |
| PABPC1  | 0.258936891  | 3.72123811 | 2.061794512  | 0.040236 | 0.05515 | -5.23498051 |
| EDC4    | -0.19114401  | 4.04131442 | -2.060631456 | 0.040348 | 0.0553  | -5.23733803 |
| AFDN    | 0.200974857  | 4.92468578 | 2.060415821  | 0.040368 | 0.05532 | -5.23777498 |
| SRRM1   | -0.157108342 | 4.89305726 | -2.060193439 | 0.04039  | 0.05535 | -5.23822556 |
| DOP1B   | 0.171337194  | 3.62219128 | 2.059815182  | 0.040426 | 0.05539 | -5.23899185 |
| ARAP2   | -0.18740545  | 3.63185764 | -2.058313416 | 0.040571 | 0.05559 | -5.24203287 |
| GRPR    | 0.066296804  | 0.25650589 | 2.05830453   | 0.040572 | 0.05559 | -5.24205086 |
| ALS2CL  | 0.233475726  | 4.6362951  | 2.057074293  | 0.040691 | 0.05574 | -5.24454043 |
| ZNF780E | -0.151668081 | 2.8562867  | -2.056786961 | 0.040719 | 0.05578 | -5.24512168 |
| PTCH1   | -0.167149246 | 2.04676562 | -2.056193347 | 0.040777 | 0.05585 | -5.24632228 |
| B3GNT8  | 0.281475352  | 3.23261166 | 2.055998465  | 0.040796 | 0.05587 | -5.24671635 |
| HECTD3  | -0.115751295 | 5.25653746 | -2.055202811 | 0.040873 | 0.05597 | -5.2483249  |
| LINGO1  | -0.217387942 | 2.05654241 | -2.055148716 | 0.040878 | 0.05598 | -5.24843424 |
| NOVA1   | -0.289310785 | 1.47115577 | -2.054073834 | 0.040983 | 0.05612 | -5.25060628 |
| NOL6    | -0.128361165 | 4.50192154 | -2.052526769 | 0.041134 | 0.05632 | -5.25373054 |
| TGM3    | 0.064981138  | 0.22242516 | 2.052509102  | 0.041136 | 0.05632 | -5.25376621 |
| GABRG3  | -0.244611541 | 0.95349657 | -2.052105551 | 0.041176 | 0.05637 | -5.25458079 |
| SLC22A3 | -0.222110056 | 1.2623213  | -2.051968748 | 0.041189 | 0.05638 | -5.25485689 |
| FAM53C  | -0.142966918 | 3.80901361 | -2.051475047 | 0.041237 | 0.05644 | -5.25585317 |
| JUND    | -0.23652713  | 8.47363704 | -2.050491778 | 0.041334 | 0.05657 | -5.25783669 |
| TCTEX1  | 0.053441291  | 0.29111571 | 2.050488581  | 0.041334 | 0.05657 | -5.25784314 |
| HSPB6   | -0.296035394 | 2.7212532  | -2.050081924 | 0.041374 | 0.05662 | -5.25866321 |
| CBS     | -0.126597502 | 0.77743395 | -2.049319666 | 0.041449 | 0.05671 | -5.26019996 |
| SLC12A3 | 0.03487678   | 0.081245   | 2.049099432  | 0.041471 | 0.05674 | -5.26064386 |
| MIXL1   | -0.194727538 | 0.64720697 | -2.047581865 | 0.041621 | 0.05694 | -5.26370139 |
| GUCD1   | -0.117157668 | 5.44183967 | -2.047415608 | 0.041637 | 0.05696 | -5.26403622 |

|         |              |            |              |          |         |             |
|---------|--------------|------------|--------------|----------|---------|-------------|
| VTN     | -0.148057473 | 0.62628928 | -2.04711813  | 0.041667 | 0.05699 | -5.26463527 |
| ZNF628  | -0.122321099 | 2.79693747 | -2.046818689 | 0.041696 | 0.05703 | -5.26523818 |
| RAB8B   | -0.167165225 | 4.11289732 | -2.046669305 | 0.041711 | 0.05704 | -5.26553892 |
| TGFB3   | 0.226827915  | 3.11462626 | 2.046324599  | 0.041745 | 0.05709 | -5.26623282 |
| FOXP1   | -0.147174751 | 3.94823281 | -2.046277644 | 0.04175  | 0.05709 | -5.26632733 |
| STX16-N | -0.118630029 | 0.70761587 | -2.046216496 | 0.041756 | 0.05709 | -5.2664504  |
| FAM180E | -0.220620685 | 0.633597   | -2.045888532 | 0.041788 | 0.05713 | -5.26711046 |
| TRIM54  | -0.312495954 | 2.01282306 | -2.045488994 | 0.041828 | 0.05718 | -5.26791442 |
| TAF4    | -0.106293858 | 2.39867463 | -2.04429314  | 0.041947 | 0.05734 | -5.27031985 |
| SERAC1  | -0.13452615  | 2.53341296 | -2.043889277 | 0.041987 | 0.05739 | -5.2711319  |
| FSD1    | 0.056010482  | 0.16601424 | 2.043022572  | 0.042073 | 0.0575  | -5.27287407 |
| ASB12   | -0.075518627 | 0.70928207 | -2.042785468 | 0.042097 | 0.05753 | -5.27335055 |
| MRE11   | -0.123910245 | 3.19828783 | -2.042321609 | 0.042143 | 0.05759 | -5.27428256 |
| METTL7L | 0.432819239  | 6.33040776 | 2.041887968  | 0.042187 | 0.05764 | -5.27515367 |
| ACO1    | -0.20595761  | 5.36706012 | -2.041685406 | 0.042207 | 0.05767 | -5.27556052 |
| KLK8    | 0.142281001  | 0.34251589 | 2.041044493  | 0.042271 | 0.05775 | -5.27684755 |
| LRATD2  | 0.238605707  | 4.91718415 | 2.03964599   | 0.042411 | 0.05794 | -5.27965454 |
| ZNF800  | -0.137272357 | 3.3622926  | -2.038996142 | 0.042477 | 0.05802 | -5.28095825 |
| EFCAB1  | -0.040363539 | 0.06562836 | -2.038699266 | 0.042507 | 0.05806 | -5.2815537  |
| DDR1    | -0.186014159 | 7.12144543 | -2.037998162 | 0.042577 | 0.05815 | -5.28295958 |
| BICRAL  | -0.167287363 | 4.09031221 | -2.037808719 | 0.042596 | 0.05817 | -5.28333939 |
| CCDC111 | -0.040358307 | 0.26062782 | -2.035334431 | 0.042846 | 0.05851 | -5.28829675 |
| CAPN13  | -0.013585699 | 0.02100125 | -2.035269118 | 0.042853 | 0.05851 | -5.28842753 |
| NBN     | -0.160615743 | 4.61021309 | -2.035085098 | 0.042872 | 0.05853 | -5.28879598 |
| GRM1    | -0.06358775  | 0.16250333 | -2.034872452 | 0.042893 | 0.05856 | -5.2892217  |
| WWC3    | -0.160676124 | 5.04810026 | -2.034594057 | 0.042921 | 0.05859 | -5.289779   |
| TP53I3  | -0.190116388 | 5.06855637 | -2.034471868 | 0.042934 | 0.0586  | -5.29002357 |
| TUBB6   | 0.216733701  | 5.33105857 | 2.032792048  | 0.043105 | 0.05883 | -5.29338448 |
| WWC2    | -0.213883831 | 3.78019492 | -2.032726053 | 0.043111 | 0.05884 | -5.29351646 |
| RAI2    | 0.223501258  | 5.31954165 | 2.03236706   | 0.043148 | 0.05888 | -5.29423434 |
| DERL1   | -0.154907534 | 5.25855318 | -2.032337843 | 0.043151 | 0.05888 | -5.29429277 |
| SLC22A1 | -0.133561811 | 1.46003228 | -2.032313051 | 0.043153 | 0.05888 | -5.29434234 |
| BRI3    | -0.121402954 | 5.70581639 | -2.032072273 | 0.043178 | 0.05891 | -5.29482374 |
| REST    | -0.169920051 | 4.19709232 | -2.031765065 | 0.043209 | 0.05895 | -5.29543789 |
| AASS    | -0.178886089 | 2.25025787 | -2.030052695 | 0.043384 | 0.05918 | -5.29885948 |
| TLR5    | 0.154707133  | 2.38747751 | 2.029824493  | 0.043408 | 0.05921 | -5.29931525 |
| LYPD5   | 0.128585269  | 1.37509942 | 2.029285023  | 0.043463 | 0.05928 | -5.3003925  |
| JSRP1   | 0.279498785  | 1.21703729 | 2.029059607  | 0.043486 | 0.0593  | -5.30084255 |
| ILDR2   | -0.068550324 | 0.21046686 | -2.028944649 | 0.043498 | 0.05932 | -5.30107204 |
| CD300A  | 0.210192392  | 2.26479825 | 2.028059785  | 0.043589 | 0.05943 | -5.30283811 |

|         |              |            |              |          |         |             |
|---------|--------------|------------|--------------|----------|---------|-------------|
| VPS18   | -0.124520149 | 5.34635948 | -2.027317121 | 0.043665 | 0.05953 | -5.30431979 |
| RTL8C   | -0.117798402 | 7.66441348 | -2.0271843   | 0.043679 | 0.05955 | -5.30458473 |
| ZNF142  | -0.130407014 | 3.32181558 | -2.027148726 | 0.043683 | 0.05955 | -5.30465568 |
| PPT2-EC | -0.058995656 | 0.53468444 | -2.026800756 | 0.043718 | 0.05959 | -5.30534968 |
| ZNF69   | -0.123083327 | 2.23940784 | -2.026736624 | 0.043725 | 0.0596  | -5.30547757 |
| PHEX    | -0.539587771 | 2.62499186 | -2.025797646 | 0.043822 | 0.05972 | -5.30734965 |
| TUBA1C  | -0.170889298 | 4.80917037 | -2.02564372  | 0.043838 | 0.05974 | -5.30765646 |
| ZC3H13  | -0.173457517 | 4.57902402 | -2.024785594 | 0.043927 | 0.05986 | -5.30936647 |
| C9orf16 | 0.177732629  | 6.72061278 | 2.02398844   | 0.044009 | 0.05996 | -5.31095436 |
| CLDN4   | 0.244973923  | 8.0610058  | 2.023895641  | 0.044019 | 0.05997 | -5.31113917 |
| PRKCI   | -0.18934699  | 5.11868886 | -2.023874865 | 0.044021 | 0.05997 | -5.31118055 |
| HCLS1   | 0.234423813  | 3.89302132 | 2.022574449  | 0.044156 | 0.06015 | -5.31376946 |
| ADAMTS  | 0.253687611  | 1.95079961 | 2.021453444  | 0.044272 | 0.0603  | -5.31599991 |
| ATP2B1  | -0.159561181 | 3.50694597 | -2.020743617 | 0.044346 | 0.0604  | -5.31741162 |
| WDFY3   | -0.16839736  | 3.46196184 | -2.019737023 | 0.044452 | 0.06054 | -5.31941273 |
| RAB15   | -0.21018706  | 4.30255388 | -2.019281106 | 0.044499 | 0.0606  | -5.32031877 |
| HERC6   | 0.196593729  | 3.44966863 | 2.019077887  | 0.044521 | 0.06062 | -5.32072256 |
| PTBP3   | -0.155831682 | 4.63548916 | -2.019055213 | 0.044523 | 0.06062 | -5.32076761 |
| PRR12   | -0.156607135 | 4.5208134  | -2.018806031 | 0.044549 | 0.06065 | -5.32126267 |
| PAN3    | -0.160553118 | 4.31842864 | -2.017268218 | 0.04471  | 0.06087 | -5.32431661 |
| ABCA6   | 0.091061145  | 0.48122267 | 2.016800444  | 0.044759 | 0.06093 | -5.32524511 |
| GTSE1   | 0.122541618  | 0.89162481 | 2.016247613  | 0.044818 | 0.061   | -5.32634218 |
| UTRN    | 0.200908021  | 5.29368732 | 2.015901885  | 0.044854 | 0.06105 | -5.32702811 |
| CDK16   | -0.097369638 | 5.78904772 | -2.015722289 | 0.044873 | 0.06107 | -5.32738438 |
| TRIB2   | 0.177156147  | 4.31662749 | 2.015705448  | 0.044875 | 0.06107 | -5.32741779 |
| IL4     | 0.075159864  | 0.34127708 | 2.015641772  | 0.044881 | 0.06107 | -5.3275441  |
| NPR2    | -0.183521798 | 2.53167808 | -2.015095268 | 0.044939 | 0.06114 | -5.32862801 |
| MINDY4E | -0.053533569 | 0.09308099 | -2.015063792 | 0.044942 | 0.06114 | -5.32869043 |
| PSD2    | 0.146473412  | 0.57259214 | 2.014609649  | 0.04499  | 0.0612  | -5.32959093 |
| LHFPL4  | 0.105551742  | 0.23106163 | 2.013731616  | 0.045083 | 0.06132 | -5.33133137 |
| CLEC17F | 0.108801337  | 0.31475823 | 2.013634381  | 0.045093 | 0.06133 | -5.33152406 |
| PIK3AP1 | -0.201445917 | 3.09913051 | -2.013248169 | 0.045134 | 0.06138 | -5.33228935 |
| TNS4    | -0.477527848 | 4.03856754 | -2.013135505 | 0.045146 | 0.0614  | -5.33251257 |
| EIF4A1  | 0.149281786  | 1.61475669 | 2.012696775  | 0.045193 | 0.06145 | -5.3333817  |
| TCF21   | -0.068881744 | 0.15274018 | -2.012496781 | 0.045214 | 0.06148 | -5.33377783 |
| CA10    | 0.072432171  | 0.0921594  | 2.012293018  | 0.045236 | 0.0615  | -5.33418138 |
| BIRC2   | -0.154227711 | 5.08460776 | -2.012004319 | 0.045266 | 0.06154 | -5.33475309 |
| RPL13   | -0.155914158 | 8.86341478 | -2.011625976 | 0.045306 | 0.06159 | -5.33550219 |
| NRK     | 0.257032814  | 0.89440303 | 2.01140282   | 0.04533  | 0.06162 | -5.33594397 |
| CMIP    | -0.134628825 | 3.22325585 | -2.011291176 | 0.045342 | 0.06163 | -5.33616497 |

|          |              |            |              |          |         |             |
|----------|--------------|------------|--------------|----------|---------|-------------|
| DSG2     | 0.229556663  | 6.13772501 | 2.010820314  | 0.045392 | 0.06169 | -5.33709692 |
| ODF3B    | -0.207864583 | 4.30889243 | -2.010287788 | 0.045449 | 0.06176 | -5.33815066 |
| AGAP2    | -0.156140943 | 1.40076031 | -2.010263811 | 0.045451 | 0.06176 | -5.3381981  |
| MYLK     | -0.178267966 | 2.47003178 | -2.009334989 | 0.04555  | 0.06189 | -5.34003535 |
| FNDC3B   | -0.173628813 | 4.68572916 | -2.008904002 | 0.045596 | 0.06195 | -5.34088758 |
| GUCY2D   | 0.111807602  | 1.00822332 | 2.008597352  | 0.045629 | 0.06199 | -5.34149384 |
| NEDD1    | -0.144746168 | 3.56105298 | -2.007368794 | 0.045761 | 0.06216 | -5.34392185 |
| CKM      | 0.175505562  | 0.25959082 | 2.007216499  | 0.045777 | 0.06218 | -5.34422273 |
| ARL6IP4  | -0.158862589 | 1.85649824 | -2.006068965 | 0.0459   | 0.06234 | -5.34648914 |
| ZNF274   | -0.154187173 | 4.00707225 | -2.005206698 | 0.045993 | 0.06246 | -5.34819132 |
| CCDC11   | -0.139052086 | 1.07820321 | -2.00372192  | 0.046153 | 0.06267 | -5.35112072 |
| TEX101   | 0.144968798  | 0.19331089 | 2.003529915  | 0.046173 | 0.0627  | -5.35149938 |
| SCG3     | -0.071074469 | 0.30865571 | -2.003254812 | 0.046203 | 0.06273 | -5.35204186 |
| RNF165   | -0.145468752 | 1.51698805 | -2.003236517 | 0.046205 | 0.06273 | -5.35207794 |
| RDM1     | -0.093159066 | 0.53422221 | -2.003018386 | 0.046229 | 0.06276 | -5.35250802 |
| ZNF670   | -0.11748573  | 2.09382193 | -2.002964304 | 0.046234 | 0.06276 | -5.35261465 |
| CTNNB1   | -0.20602056  | 7.89726842 | -2.002589452 | 0.046275 | 0.06281 | -5.35335361 |
| SMIM3    | 0.200244087  | 5.06376017 | 2.00199684   | 0.046339 | 0.06289 | -5.35452158 |
| PRAG1    | -0.269029329 | 5.01704103 | -2.001614937 | 0.046381 | 0.06294 | -5.35527409 |
| VENTX    | 0.122980277  | 0.90696382 | 2.001544226  | 0.046388 | 0.06295 | -5.3554134  |
| CYFIP2   | -0.184590478 | 4.22731657 | -2.000986968 | 0.046449 | 0.06303 | -5.35651114 |
| TAF1A    | -0.145823858 | 2.22004948 | -2.000474426 | 0.046504 | 0.0631  | -5.35752054 |
| TNF      | 0.18744758   | 0.81261731 | 2.000163531  | 0.046538 | 0.06314 | -5.35813269 |
| MSI2     | -0.160588991 | 4.08037115 | -1.999890378 | 0.046568 | 0.06317 | -5.35867046 |
| CERS6    | -0.195934969 | 4.02031518 | -1.999611628 | 0.046598 | 0.06321 | -5.35921916 |
| ELOVL3   | 0.04961958   | 0.25604339 | 1.99927514   | 0.046635 | 0.06325 | -5.35988143 |
| FBXO6    | 0.131383421  | 4.59071437 | 1.998685907  | 0.046699 | 0.06333 | -5.36104087 |
| TMEM13   | -0.132448829 | 0.20607834 | -1.998360075 | 0.046734 | 0.06338 | -5.36168188 |
| STAB1    | -0.177157834 | 3.58968762 | -1.997191272 | 0.046862 | 0.06355 | -5.36398041 |
| C19orf12 | -0.094701734 | 3.65534627 | -1.996264954 | 0.046963 | 0.06368 | -5.36580116 |
| SAPCD2   | -0.139404979 | 1.63050506 | -1.996095629 | 0.046982 | 0.0637  | -5.36613389 |
| HASPIN   | 0.081619688  | 0.4717225  | 1.995838253  | 0.04701  | 0.06373 | -5.3666396  |
| TMOD3    | 0.180551695  | 4.24291472 | 1.995792882  | 0.047015 | 0.06373 | -5.36672874 |
| EML4     | -0.158939023 | 4.97748301 | -1.994843888 | 0.047119 | 0.06387 | -5.36859278 |
| DONSON   | 0.128161127  | 3.05694728 | 1.994369521  | 0.047171 | 0.06393 | -5.36952422 |
| 6-Mar    | -0.142317728 | 5.33725648 | -1.993672713 | 0.047248 | 0.06403 | -5.37089205 |
| ANKRD3   | -0.1235615   | 0.68852167 | -1.99300396  | 0.047322 | 0.06413 | -5.37220437 |
| NID1     | 0.236839089  | 4.76266272 | 1.99183488   | 0.047451 | 0.0643  | -5.37449747 |
| SRPK3    | 0.077870036  | 0.35054169 | 1.991236117  | 0.047517 | 0.06438 | -5.37567142 |
| CPA4     | 0.029112867  | 0.08364564 | 1.991112428  | 0.04753  | 0.0644  | -5.37591388 |

|         |              |            |              |          |         |             |
|---------|--------------|------------|--------------|----------|---------|-------------|
| LPCAT1  | -0.14163749  | 4.41914101 | -1.990653837 | 0.047581 | 0.06446 | -5.37681272 |
| MAP3K1  | 0.180022642  | 3.1779027  | 1.990437744  | 0.047605 | 0.06449 | -5.37723619 |
| RCOR1   | -0.138155776 | 3.621273   | -1.990312039 | 0.047619 | 0.0645  | -5.37748251 |
| MAML2   | 0.222270627  | 3.82315482 | 1.990272273  | 0.047624 | 0.0645  | -5.37756043 |
| MDM2    | -0.167113416 | 4.42998286 | -1.990239082 | 0.047627 | 0.0645  | -5.37762546 |
| JMY     | -0.157281755 | 4.18656438 | -1.990018253 | 0.047652 | 0.06453 | -5.37805813 |
| UBE2QL  | -0.282377374 | 3.68226046 | -1.98974452  | 0.047682 | 0.06456 | -5.37859438 |
| GAL3ST  | 0.044122072  | 0.13655841 | 1.988351897  | 0.047837 | 0.06477 | -5.38132148 |
| HEATR9  | 0.024825058  | 0.08967574 | 1.98766203   | 0.047914 | 0.06487 | -5.38267172 |
| HEXIM1  | -0.152380129 | 5.64656296 | -1.987511614 | 0.04793  | 0.06489 | -5.38296606 |
| PTGIR   | -0.143537683 | 1.53665955 | -1.986652324 | 0.048026 | 0.06501 | -5.38464715 |
| DCAF12I | -0.147399026 | 0.58285102 | -1.98611226  | 0.048086 | 0.06509 | -5.38570336 |
| EXOC3L  | 0.097213258  | 0.32807198 | 1.985788697  | 0.048123 | 0.06513 | -5.38633601 |
| ZNF730  | 0.092007411  | 0.5507316  | 1.985156455  | 0.048193 | 0.06522 | -5.38757194 |
| UBE2C   | 0.248527823  | 2.40429267 | 1.984944015  | 0.048217 | 0.06525 | -5.38798714 |
| FAM71F  | -0.020375696 | 0.0359885  | -1.984271166 | 0.048292 | 0.06534 | -5.38930189 |
| ANGEL2  | -0.120255118 | 3.52736892 | -1.983079487 | 0.048426 | 0.06552 | -5.39162938 |
| TNXB    | 0.197003264  | 1.80030461 | 1.982826391  | 0.048455 | 0.06555 | -5.39212353 |
| PTGER3  | -0.106347421 | 0.68639956 | -1.982724856 | 0.048466 | 0.06556 | -5.39232175 |
| FGF22   | -0.027790959 | 0.13724122 | -1.982342244 | 0.048509 | 0.06562 | -5.39306862 |
| MEGF9   | 0.268621442  | 6.14644821 | 1.981540632  | 0.048599 | 0.06573 | -5.39463293 |
| UMODL1  | -0.016538529 | 0.02687753 | -1.981464765 | 0.048608 | 0.06574 | -5.39478095 |
| MERTK   | -0.214444767 | 3.88661438 | -1.981336949 | 0.048622 | 0.06575 | -5.39503031 |
| KLHL30  | 0.202528959  | 1.39423349 | 1.980905605  | 0.048671 | 0.06581 | -5.39587173 |
| CPED1   | -0.163796706 | 1.27580042 | -1.980103913 | 0.048762 | 0.06593 | -5.3974351  |
| GGA2    | -0.135986259 | 6.16806749 | -1.979911577 | 0.048783 | 0.06596 | -5.39781008 |
| CDK7    | -0.118086182 | 5.0536626  | -1.97790948  | 0.04901  | 0.06626 | -5.4017113  |
| TMPRSS  | 0.07034105   | 0.5583383  | 1.977872775  | 0.049014 | 0.06626 | -5.40178278 |
| FAR2    | -0.149305808 | 1.9456691  | -1.977431974 | 0.049065 | 0.06632 | -5.40264118 |
| TMPRSS  | -0.046859291 | 0.29154136 | -1.977169131 | 0.049094 | 0.06635 | -5.40315295 |
| PTGFR   | 0.055043969  | 0.13785888 | 1.977151632  | 0.049096 | 0.06635 | -5.40318702 |
| RASA4B  | 0.024791868  | 0.10785095 | 1.977035857  | 0.04911  | 0.06637 | -5.40341241 |
| ATP8B3  | -0.136939458 | 0.75308027 | -1.976879698 | 0.049127 | 0.06638 | -5.4037164  |
| SEPTIN1 | -0.188880163 | 5.11121052 | -1.976280224 | 0.049196 | 0.06647 | -5.40488319 |
| STAG3   | 0.110384621  | 0.83661101 | 1.97604652   | 0.049222 | 0.0665  | -5.40533796 |
| GANC    | -0.145209083 | 2.87220124 | -1.975533637 | 0.049281 | 0.06658 | -5.40633582 |
| PSMA8   | -0.03507357  | 0.08129199 | -1.975447112 | 0.049291 | 0.06658 | -5.40650414 |
| GNG12   | -0.179747521 | 6.34193157 | -1.975367755 | 0.0493   | 0.06659 | -5.4066585  |
| NCOA3   | -0.149496361 | 4.25923251 | -1.975201899 | 0.049319 | 0.06661 | -5.40698111 |
| LACTB2  | -0.15251251  | 4.59965732 | -1.975196693 | 0.049319 | 0.06661 | -5.40699124 |

|         |              |            |              |          |         |             |
|---------|--------------|------------|--------------|----------|---------|-------------|
| ARHGAP  | 0.86803182   | 4.22967695 | 1.975133383  | 0.049326 | 0.06661 | -5.40711437 |
| CAMSAP  | -0.154125956 | 4.49201495 | -1.974874684 | 0.049356 | 0.06664 | -5.4076175  |
| GNAZ    | 0.187653448  | 2.62170061 | 1.974754895  | 0.04937  | 0.06666 | -5.40785045 |
| EBF1    | -0.176822848 | 2.25422723 | -1.973243797 | 0.049542 | 0.06689 | -5.41078784 |
| RAB12   | -0.134526073 | 5.29016675 | -1.97320366  | 0.049547 | 0.06689 | -5.41086583 |
| MAPK6   | -0.178440101 | 4.45819733 | -1.973062568 | 0.049563 | 0.0669  | -5.41113998 |
| APC2    | -0.064636865 | 0.5995851  | -1.97296996  | 0.049574 | 0.06691 | -5.41131991 |
| NDST3   | -0.098726386 | 0.28230063 | -1.972446692 | 0.049634 | 0.06699 | -5.41233643 |
| CSNK1A  | -0.202751238 | 4.70761314 | -1.971927931 | 0.049693 | 0.06706 | -5.41334394 |
| USP36   | -0.12408421  | 4.10774475 | -1.971747558 | 0.049714 | 0.06709 | -5.41369419 |
| TMEM25  | 0.250299107  | 1.3475021  | 1.970764526  | 0.049827 | 0.06723 | -5.41560251 |
| PI4KA   | -0.174424008 | 4.50704502 | -1.970431024 | 0.049866 | 0.06728 | -5.41624971 |
| ZNF169  | -0.099181514 | 1.09407024 | -1.970366327 | 0.049873 | 0.06728 | -5.41637525 |
| CA13    | -0.15517127  | 3.62057903 | -1.969672311 | 0.049953 | 0.06739 | -5.41772169 |
| DMD     | 0.322383281  | 2.71707179 | 1.969629762  | 0.049958 | 0.06739 | -5.41780423 |
| SETD7   | 0.188150319  | 3.40532914 | 1.969591891  | 0.049962 | 0.06739 | -5.41787768 |
| OAF     | -0.169017959 | 4.67611889 | -1.969538648 | 0.049969 | 0.06739 | -5.41798096 |
| DPP9    | -0.096737137 | 4.28513954 | -1.969165208 | 0.050012 | 0.06744 | -5.41870522 |
| CTAGE1  | -0.054431978 | 0.2356785  | -1.969000749 | 0.050031 | 0.06746 | -5.41902414 |
| CHRNA1  | 0.10586279   | 0.27696786 | 1.967422932  | 0.050213 | 0.06771 | -5.42208249 |
| PTPRS   | -0.185617062 | 4.79185096 | -1.966900424 | 0.050274 | 0.06778 | -5.42309477 |
| CTRB1   | -0.043902368 | 0.10617729 | -1.966108701 | 0.050366 | 0.0679  | -5.42462811 |
| NCSTN   | -0.148834582 | 6.86340138 | -1.966014859 | 0.050377 | 0.06791 | -5.42480982 |
| NLRC3   | -0.132094248 | 1.85498114 | -1.965395985 | 0.050449 | 0.068   | -5.42600793 |
| U2SURP  | -0.145409255 | 4.52803547 | -1.96500393  | 0.050494 | 0.06806 | -5.42676674 |
| ABCC12  | -0.094906715 | 0.11762305 | -1.964734099 | 0.050526 | 0.06809 | -5.4272889  |
| GNA12   | -0.142935085 | 4.32536959 | -1.964319951 | 0.050574 | 0.06815 | -5.42809021 |
| ARC     | -0.3723701   | 2.10433931 | -1.963328506 | 0.05069  | 0.0683  | -5.43000782 |
| ATG9A   | -0.119286883 | 4.64658088 | -1.963140947 | 0.050711 | 0.06833 | -5.43037048 |
| SYT16   | -0.024572345 | 0.08121207 | -1.96277309  | 0.050754 | 0.06838 | -5.43108167 |
| LHX5    | 0.02233512   | 0.05760041 | 1.96274767   | 0.050757 | 0.06838 | -5.43113081 |
| SRGAP2  | 0.114099271  | 1.55612274 | 1.962626813  | 0.050772 | 0.06839 | -5.43136443 |
| MGAT2   | -0.17141475  | 1.81810393 | -1.962279612 | 0.050812 | 0.06844 | -5.43203552 |
| TSPYL2  | -0.200751339 | 4.90256712 | -1.961987295 | 0.050846 | 0.06848 | -5.43260043 |
| STEAP4  | 0.260241124  | 3.83810954 | 1.961731697  | 0.050876 | 0.06852 | -5.43309432 |
| PALM2-A | -0.028777786 | 0.12221514 | -1.96161035  | 0.050891 | 0.06853 | -5.43332878 |
| SCYL2   | -0.149995452 | 4.26311451 | -1.961383414 | 0.050917 | 0.06856 | -5.4337672  |
| PPP1R1  | -0.282812845 | 6.93867043 | -1.960837302 | 0.050981 | 0.06864 | -5.43482205 |
| EEF1B2  | -0.153596248 | 8.28811451 | -1.960363405 | 0.051037 | 0.06871 | -5.43573718 |
| PCDHB1  | -0.020135305 | 0.0271608  | -1.960061252 | 0.051072 | 0.06875 | -5.43632055 |

|         |              |            |              |          |         |             |
|---------|--------------|------------|--------------|----------|---------|-------------|
| TEAD1   | 0.219718633  | 4.87446511 | 1.959737966  | 0.05111  | 0.0688  | -5.43694462 |
| GOLGA6  | -0.093119218 | 0.87074001 | -1.959266555 | 0.051166 | 0.06887 | -5.43785446 |
| MUC12   | 0.015565229  | 0.03641475 | 1.958996857  | 0.051198 | 0.06891 | -5.43837488 |
| BFSP2   | -0.129636763 | 0.41874134 | -1.958863989 | 0.051213 | 0.06892 | -5.43863125 |
| DHRS2   | -0.115745541 | 0.35284921 | -1.958755515 | 0.051226 | 0.06893 | -5.43884054 |
| BUB1B   | -0.156256709 | 1.55236845 | -1.957788972 | 0.05134  | 0.06908 | -5.44070485 |
| KCND1   | 0.138252461  | 1.39384165 | 1.957599446  | 0.051362 | 0.06911 | -5.44107032 |
| CYP2A6  | 0.051068657  | 0.17842989 | 1.95743184   | 0.051382 | 0.06913 | -5.44139348 |
| ZNF320  | -0.150244273 | 3.28466435 | -1.956444132 | 0.051499 | 0.06928 | -5.44329736 |
| PDXK    | -0.124762074 | 5.09814557 | -1.955678789 | 0.05159  | 0.0694  | -5.44477197 |
| DHX37   | -0.111010741 | 3.44467057 | -1.955374531 | 0.051626 | 0.06944 | -5.44535804 |
| KIRREL2 | -0.050581507 | 0.13725327 | -1.955177258 | 0.051649 | 0.06946 | -5.44573799 |
| MTHFD2  | 0.237291836  | 3.30266747 | 1.954549631  | 0.051724 | 0.06956 | -5.44694654 |
| ADCYAP  | 0.072375378  | 0.16726335 | 1.952914823  | 0.051918 | 0.06982 | -5.45009275 |
| CHAC1   | -0.239884394 | 1.66221371 | -1.952289623 | 0.051993 | 0.06991 | -5.45129527 |
| SERPIN1 | -0.155670029 | 0.32094257 | -1.95152882  | 0.052084 | 0.07003 | -5.45275812 |
| ACTC1   | 0.150581623  | 0.42626694 | 1.950858658  | 0.052164 | 0.07013 | -5.45404623 |
| KCNH4   | 0.042661548  | 0.20156467 | 1.950161384  | 0.052247 | 0.07024 | -5.45538599 |
| CRACR2  | 0.168032265  | 0.81313531 | 1.950105349  | 0.052254 | 0.07024 | -5.45549364 |
| TAP2    | 0.169547362  | 3.37169091 | 1.949686618  | 0.052304 | 0.0703  | -5.45629795 |
| CSNK2A  | -0.07284079  | 0.45459707 | -1.9492037   | 0.052362 | 0.07037 | -5.45722535 |
| ELF5    | 0.032403175  | 0.10578798 | 1.949033398  | 0.052383 | 0.0704  | -5.45755235 |
| ANP32E  | -0.136862335 | 6.01282779 | -1.948814097 | 0.052409 | 0.07043 | -5.45797339 |
| TRIM69  | 0.180651733  | 4.00868878 | 1.948230659  | 0.052479 | 0.07051 | -5.45909332 |
| SELE    | -0.330955505 | 2.23290858 | -1.946846978 | 0.052646 | 0.07073 | -5.46174803 |
| AHSG    | -0.072143267 | 0.14986978 | -1.946846413 | 0.052646 | 0.07073 | -5.46174911 |
| HBE1    | -0.072249447 | 0.3641588  | -1.9449816   | 0.052871 | 0.07102 | -5.46532402 |
| TSPAN11 | -0.020742334 | 0.07752326 | -1.944810389 | 0.052892 | 0.07105 | -5.46565207 |
| SLAIN2  | -0.139523246 | 4.77002611 | -1.94471105  | 0.052904 | 0.07106 | -5.4658424  |
| HBQ1    | -0.079901414 | 0.25679026 | -1.944681721 | 0.052907 | 0.07106 | -5.46589859 |
| CPA6    | -0.044384025 | 0.13245313 | -1.944398732 | 0.052942 | 0.0711  | -5.46644072 |
| CTSF    | -0.248026981 | 5.27634259 | -1.944066324 | 0.052982 | 0.07114 | -5.46707742 |
| PDLIM2  | -0.113477309 | 1.83183046 | -1.943838874 | 0.05301  | 0.07118 | -5.46751302 |
| NECTIN1 | 0.185374503  | 2.50676595 | 1.942885761  | 0.053125 | 0.07133 | -5.46933785 |
| MOGAT2  | -0.019697751 | 0.03972144 | -1.942090821 | 0.053222 | 0.07145 | -5.47085917 |
| TNFSF15 | 0.248743331  | 2.35176109 | 1.941969478  | 0.053237 | 0.07146 | -5.47109134 |
| BPI     | 0.022764707  | 0.06960944 | 1.941899722  | 0.053245 | 0.07147 | -5.4712248  |
| BMPR2   | -0.173765047 | 4.74725179 | -1.941708659 | 0.053269 | 0.0715  | -5.47159032 |
| PHOSPH  | -0.117607835 | 0.76401841 | -1.940998318 | 0.053355 | 0.07161 | -5.47294897 |
| HAND2   | -0.128429051 | 0.52488438 | -1.940306042 | 0.05344  | 0.07171 | -5.4742726  |



|          |              |            |              |          |         |             |
|----------|--------------|------------|--------------|----------|---------|-------------|
| KLHL24   | -0.152304148 | 4.47189443 | -1.939491805 | 0.053539 | 0.07184 | -5.47582884 |
| CAMTA2   | -0.10853965  | 5.00165449 | -1.939192232 | 0.053576 | 0.07188 | -5.47640125 |
| CEP290   | -0.132584445 | 2.78414048 | -1.939020797 | 0.053597 | 0.0719  | -5.47672878 |
| AGBL3    | -0.082540069 | 1.21153855 | -1.939004028 | 0.053599 | 0.0719  | -5.47676081 |
| HUS1B    | -0.071142612 | 0.34307154 | -1.938073879 | 0.053713 | 0.07205 | -5.47853738 |
| FANK1    | -0.144057458 | 3.76678613 | -1.937292839 | 0.053809 | 0.07217 | -5.48002851 |
| C6orf141 | 0.090857207  | 0.36184724 | 1.936115167  | 0.053953 | 0.07236 | -5.48227577 |
| TNFAIP1  | -0.121377016 | 5.7683411  | -1.935303931 | 0.054053 | 0.07249 | -5.48382302 |
| ZCCHC1   | 0.154421827  | 4.78261433 | 1.934697362  | 0.054128 | 0.07259 | -5.4849795  |
| HOXA13   | -0.045096799 | 0.07381025 | -1.934321715 | 0.054175 | 0.07264 | -5.48569553 |
| DNAH11   | -0.162732052 | 0.99268454 | -1.934269601 | 0.054181 | 0.07265 | -5.48579486 |
| TSTA3    | -0.136069923 | 5.91601748 | -1.933910947 | 0.054225 | 0.0727  | -5.48647835 |
| PPFIA1   | -0.148118605 | 4.21218872 | -1.932787138 | 0.054364 | 0.07288 | -5.48861923 |
| CACNA1   | -0.311157629 | 2.48777378 | -1.932350866 | 0.054419 | 0.07295 | -5.48945    |
| SDE2     | -0.172617226 | 4.29234544 | -1.932309818 | 0.054424 | 0.07295 | -5.48952816 |
| LRCH3    | -0.105519657 | 2.85998157 | -1.932194382 | 0.054438 | 0.07296 | -5.48974795 |
| RASEF    | -0.212556415 | 4.92815181 | -1.931842843 | 0.054482 | 0.07301 | -5.49041719 |
| PDZD7    | 0.106867036  | 0.91021232 | 1.931801434  | 0.054487 | 0.07301 | -5.49049601 |
| KNDC1    | -0.190371163 | 2.77955309 | -1.930089184 | 0.0547   | 0.07329 | -5.49375393 |
| SLC4A11  | 0.310404467  | 4.57379514 | 1.929852321  | 0.054729 | 0.07333 | -5.49420439 |
| RMI1     | -0.147973922 | 3.12479049 | -1.929711378 | 0.054747 | 0.07335 | -5.49447241 |
| POU5F2   | 0.011762633  | 0.02900554 | 1.928876996  | 0.054851 | 0.07348 | -5.49605868 |
| MBTD1    | -0.143174637 | 3.44871497 | -1.928820892 | 0.054858 | 0.07348 | -5.49616532 |
| DRICH1   | 0.155742242  | 1.17216607 | 1.928795864  | 0.054861 | 0.07348 | -5.49621289 |
| CPNE9    | 0.043300497  | 0.16902429 | 1.928728139  | 0.054869 | 0.07349 | -5.49634161 |
| CEACAM   | 0.083771406  | 0.13833035 | 1.928322644  | 0.05492  | 0.07355 | -5.49711221 |
| ERI1     | 0.110913297  | 2.68525564 | 1.928270938  | 0.054926 | 0.07355 | -5.49721046 |
| CCNF     | -0.094484774 | 1.51360361 | -1.928117619 | 0.054946 | 0.07357 | -5.49750178 |
| PODN     | 0.289599099  | 1.90292755 | 1.928017594  | 0.054958 | 0.07358 | -5.49769183 |
| PSCA     | -0.094797454 | 0.1908434  | -1.927866918 | 0.054977 | 0.0736  | -5.49797809 |
| FBXO31   | -0.118116687 | 4.19252591 | -1.927826425 | 0.054982 | 0.0736  | -5.49805501 |
| ATAD5    | 0.077585113  | 1.06603421 | 1.927636781  | 0.055006 | 0.07363 | -5.49841527 |
| PKD1L1   | -0.056045054 | 0.47148661 | -1.926553589 | 0.055141 | 0.0738  | -5.50047228 |
| CAPRIN1  | -0.156039317 | 6.21427272 | -1.926100655 | 0.055198 | 0.07387 | -5.50133208 |
| HBP1     | -0.197354397 | 4.75921177 | -1.92609901  | 0.055198 | 0.07387 | -5.5013352  |
| SLC9B2   | 0.11495442   | 1.44531255 | 1.925834711  | 0.055232 | 0.07391 | -5.50183683 |
| PAX5     | 0.153940789  | 0.2875559  | 1.925583573  | 0.055263 | 0.07394 | -5.50231342 |
| ACSBG1   | -0.04445996  | 0.11297578 | -1.925580862 | 0.055263 | 0.07394 | -5.50231856 |
| PYCARD   | 0.24077674   | 4.11998326 | 1.923876926  | 0.055478 | 0.07422 | -5.50555052 |
| ATP2B2   | -0.057714869 | 0.06737776 | -1.923757018 | 0.055493 | 0.07423 | -5.50577786 |

|         |              |            |              |          |         |             |
|---------|--------------|------------|--------------|----------|---------|-------------|
| PNMA1   | -0.171972173 | 6.18551585 | -1.92341792  | 0.055536 | 0.07429 | -5.50642068 |
| ANKRD1  | -0.040231523 | 0.09146672 | -1.923382786 | 0.05554  | 0.07429 | -5.50648727 |
| EDNRA   | 0.195911506  | 3.16602016 | 1.923121913  | 0.055573 | 0.07432 | -5.50698172 |
| DNA2    | -0.083384877 | 1.06635427 | -1.92281948  | 0.055611 | 0.07437 | -5.50755485 |
| ABLIM3  | -0.187644213 | 1.99286911 | -1.921840423 | 0.055735 | 0.07453 | -5.50940964 |
| LTBP4   | -0.289498493 | 6.50855108 | -1.921367223 | 0.055795 | 0.0746  | -5.51030578 |
| PRSS27  | -0.084117356 | 0.75342607 | -1.921188007 | 0.055817 | 0.07463 | -5.51064512 |
| IMPDH1  | 0.13240028   | 4.25642098 | 1.921153273  | 0.055822 | 0.07463 | -5.51071088 |
| SAMD12  | -0.176017258 | 3.46335929 | -1.920850092 | 0.05586  | 0.07467 | -5.51128486 |
| PRR4    | -0.085352798 | 0.92386619 | -1.92084376  | 0.055861 | 0.07467 | -5.51129685 |
| PSORS1  | 0.080433691  | 0.29795337 | 1.920597492  | 0.055892 | 0.0747  | -5.51176302 |
| SYNE2   | -0.192219733 | 4.47120011 | -1.92051732  | 0.055902 | 0.07471 | -5.51191476 |
| DTL     | 0.169460141  | 1.7205232  | 1.920317251  | 0.055928 | 0.07474 | -5.51229342 |
| TLR7    | 0.162796623  | 1.10805492 | 1.920307557  | 0.055929 | 0.07474 | -5.51231177 |
| PXDC1   | -0.122731955 | 5.84837047 | -1.919809281 | 0.055992 | 0.07481 | -5.51325465 |
| GLDN    | 0.339145754  | 1.28437625 | 1.919417933  | 0.056042 | 0.07487 | -5.51399503 |
| SEMA4C  | 0.178711057  | 4.43996127 | 1.918915347  | 0.056106 | 0.07495 | -5.51494564 |
| MYMX    | -0.076774559 | 0.39580642 | -1.918704062 | 0.056133 | 0.07498 | -5.5153452  |
| FRS2    | -0.160041672 | 3.67019121 | -1.918466693 | 0.056163 | 0.07502 | -5.51579404 |
| MED23   | -0.147623525 | 3.92247573 | -1.917896513 | 0.056236 | 0.07511 | -5.51687196 |
| RARA    | 0.151383082  | 4.99319206 | 1.916967814  | 0.056354 | 0.07526 | -5.51862699 |
| ZNF41   | -0.159103397 | 2.89746279 | -1.916710269 | 0.056387 | 0.0753  | -5.51911355 |
| ERCC6L  | 0.064121855  | 0.58190627 | 1.91643038   | 0.056423 | 0.07534 | -5.51964225 |
| PCDHB1  | -0.172435457 | 1.20195633 | -1.916223827 | 0.056449 | 0.07537 | -5.52003237 |
| IL27RA  | 0.213690383  | 4.16840915 | 1.915910246  | 0.056489 | 0.07542 | -5.52062456 |
| ADAMTS  | 0.16648204   | 0.61094092 | 1.91582766   | 0.0565   | 0.07543 | -5.5207805  |
| LRCH2   | 0.23914456   | 2.06223843 | 1.914861043  | 0.056624 | 0.07559 | -5.52260526 |
| SSTR2   | -0.128256496 | 1.0626805  | -1.914582733 | 0.056659 | 0.07563 | -5.52313048 |
| PKIB    | 0.1699507    | 1.65553431 | 1.913118639  | 0.056847 | 0.07587 | -5.52589228 |
| GREB1L  | 0.199653899  | 1.86924822 | 1.912484368  | 0.056929 | 0.07598 | -5.52708809 |
| B2M     | 0.253916296  | 11.0716717 | 1.912100934  | 0.056978 | 0.07604 | -5.52781081 |
| NANOS3  | -0.18963982  | 1.97835091 | -1.91195273  | 0.056998 | 0.07606 | -5.52809012 |
| SPC25   | -0.125023715 | 0.98882795 | -1.910508023 | 0.057184 | 0.0763  | -5.53081171 |
| SLC15A3 | 0.196054807  | 2.86885507 | 1.91040266   | 0.057198 | 0.07631 | -5.53101012 |
| ZNF578  | -0.080132842 | 0.58223939 | -1.909956763 | 0.057255 | 0.07638 | -5.53184967 |
| OSGEP   | -0.119498263 | 4.65848415 | -1.909943335 | 0.057257 | 0.07638 | -5.53187495 |
| FBN2    | 0.251349853  | 1.28678191 | 1.908830067  | 0.057401 | 0.07656 | -5.5339702  |
| SPESP1  | -0.297893967 | 1.61274469 | -1.908264204 | 0.057475 | 0.07666 | -5.53503474 |
| PLBD1   | 0.212235265  | 3.54815376 | 1.907275562  | 0.057603 | 0.07682 | -5.53689391 |
| SLC16A4 | -0.239477003 | 4.62882399 | -1.907214764 | 0.057611 | 0.07683 | -5.53700821 |

|          |              |            |              |          |         |             |
|----------|--------------|------------|--------------|----------|---------|-------------|
| RAD52    | -0.151964863 | 3.11871863 | -1.905757609 | 0.057801 | 0.07707 | -5.53974663 |
| TMSB15I  | 0.013435607  | 0.06075409 | 1.905454032  | 0.05784  | 0.07712 | -5.54031688 |
| CDK19    | 0.133781661  | 3.42501963 | 1.904963428  | 0.057904 | 0.0772  | -5.54123827 |
| CCNG1    | -0.143915202 | 6.92731307 | -1.904263281 | 0.057996 | 0.07731 | -5.5425528  |
| TRNP1    | 0.254845085  | 3.27256653 | 1.903924811  | 0.05804  | 0.07736 | -5.54318811 |
| UBE2D1   | -0.126850091 | 3.95156975 | -1.903913946 | 0.058042 | 0.07736 | -5.5432085  |
| RNF103   | -0.022727477 | 0.11533139 | -1.90305955  | 0.058154 | 0.07751 | -5.5448117  |
| C11orf95 | -0.190864062 | 4.39176803 | -1.902978244 | 0.058164 | 0.07751 | -5.54496423 |
| SLC4A8   | 0.067430837  | 0.21121771 | 1.902399126  | 0.05824  | 0.07761 | -5.54605046 |
| CYP11A1  | -0.134830869 | 0.45408358 | -1.90217936  | 0.058269 | 0.07764 | -5.54646258 |
| NUDCD3   | -0.110663494 | 4.88900381 | -1.901989832 | 0.058294 | 0.07767 | -5.54681796 |
| STRADA   | -0.113361419 | 2.14840763 | -1.90156177  | 0.05835  | 0.07774 | -5.54762048 |
| CNTLN    | -0.095238971 | 1.47683586 | -1.90134315  | 0.058379 | 0.07777 | -5.54803028 |
| GPC1     | -0.150725745 | 4.37540429 | -1.901247449 | 0.058392 | 0.07778 | -5.54820965 |
| LENEP    | -0.051547638 | 0.19083438 | -1.900397961 | 0.058503 | 0.07792 | -5.54980148 |
| CARF     | -0.138856095 | 2.63529223 | -1.900205898 | 0.058529 | 0.07795 | -5.55016129 |
| SLC18A2  | 0.087686366  | 0.27386592 | 1.8990966    | 0.058675 | 0.07814 | -5.55223872 |
| DKKL1    | 0.066555739  | 0.28771513 | 1.898984609  | 0.05869  | 0.07815 | -5.55244838 |
| TESC     | -0.422459307 | 6.23279716 | -1.898520272 | 0.058751 | 0.07823 | -5.55331757 |
| PI3      | 0.138901756  | 0.45846654 | 1.898317781  | 0.058778 | 0.07826 | -5.55369654 |
| PKP1     | 0.201681716  | 1.06936556 | 1.89743488   | 0.058895 | 0.07841 | -5.55534849 |
| KDM3B    | -0.159629654 | 5.40076393 | -1.896962763 | 0.058957 | 0.07848 | -5.55623153 |
| KLK2     | -0.185493528 | 0.63874751 | -1.896260241 | 0.059051 | 0.0786  | -5.55754513 |
| NTN1     | -0.152396276 | 0.90641846 | -1.895996679 | 0.059086 | 0.07864 | -5.55803782 |
| TPBGL    | -0.10117605  | 0.53229353 | -1.895774128 | 0.059115 | 0.07868 | -5.5584538  |
| UPP2     | 0.083520923  | 0.66289083 | 1.895582166  | 0.059141 | 0.0787  | -5.55881257 |
| CDK12    | -0.151034079 | 3.49813918 | -1.895450202 | 0.059158 | 0.07872 | -5.55905918 |
| TICRR    | -0.058898672 | 0.53880479 | -1.894931459 | 0.059227 | 0.07881 | -5.56002843 |
| FBRS     | -0.107399748 | 5.41507038 | -1.894869338 | 0.059235 | 0.07881 | -5.56014449 |
| CALCB    | -0.28335982  | 0.88272669 | -1.894547591 | 0.059278 | 0.07886 | -5.56074552 |
| CCDC14   | 0.174043518  | 2.9845951  | 1.894498559  | 0.059285 | 0.07887 | -5.5608371  |
| PDCD11   | -0.128451985 | 3.98799767 | -1.894404952 | 0.059297 | 0.07888 | -5.56101193 |
| TTC13    | -0.139479814 | 3.09864233 | -1.893916995 | 0.059362 | 0.07896 | -5.56192319 |
| SCO2     | -0.124427188 | 4.79615127 | -1.893217124 | 0.059456 | 0.07907 | -5.56322978 |
| TPCN2    | -0.107868643 | 2.54668941 | -1.893196443 | 0.059459 | 0.07907 | -5.56326839 |
| ATXN3    | -0.079682646 | 1.83876252 | -1.892308319 | 0.059577 | 0.07922 | -5.56492574 |
| NKAIN2   | 0.080256129  | 0.34645343 | 1.892283394  | 0.059581 | 0.07922 | -5.56497224 |
| BAZ1B    | -0.140360387 | 5.55118634 | -1.892236318 | 0.059587 | 0.07922 | -5.56506007 |
| SLC22A1  | -0.01547424  | 0.04806689 | -1.891163127 | 0.059731 | 0.07941 | -5.56706171 |
| TNMD     | -0.056974826 | 0.14574415 | -1.890980502 | 0.059755 | 0.07943 | -5.56740222 |

|          |              |            |              |          |         |             |
|----------|--------------|------------|--------------|----------|---------|-------------|
| CTSW     | 0.307579653  | 3.07311618 | 1.890951263  | 0.059759 | 0.07943 | -5.56745673 |
| PLD3     | -0.189562913 | 7.94483007 | -1.89039125  | 0.059834 | 0.07953 | -5.56850067 |
| APOC1    | 0.495451367  | 6.24118328 | 1.890157127  | 0.059866 | 0.07956 | -5.56893702 |
| PDCL2    | 0.1257765    | 0.43705076 | 1.890089537  | 0.059875 | 0.07957 | -5.56906298 |
| KLRF2    | 0.047630611  | 0.11529555 | 1.889840296  | 0.059908 | 0.07961 | -5.56952743 |
| ZNF888   | 0.15091347   | 1.36155665 | 1.889056553  | 0.060013 | 0.07974 | -5.57098752 |
| CEP55    | 0.148394424  | 1.44602575 | 1.888810544  | 0.060047 | 0.07977 | -5.5714457  |
| CENPF    | 0.153285376  | 1.14960699 | 1.888773126  | 0.060052 | 0.07977 | -5.57151539 |
| GFRA1    | -0.175048546 | 0.682638   | -1.888764107 | 0.060053 | 0.07977 | -5.57153218 |
| ART1     | -0.051725923 | 0.21903145 | -1.88865859  | 0.060067 | 0.07979 | -5.57172868 |
| OTUD1    | -0.150309131 | 5.4578332  | -1.888516847 | 0.060086 | 0.07981 | -5.57199263 |
| MMP2     | 0.282977986  | 5.70987396 | 1.888285678  | 0.060117 | 0.07984 | -5.57242305 |
| IL9R     | 0.078283566  | 0.30978089 | 1.887921584  | 0.060166 | 0.0799  | -5.57310088 |
| FAM221E  | -0.053920563 | 0.29606147 | -1.8878109   | 0.060181 | 0.07991 | -5.57330691 |
| ZNF334   | -0.176804785 | 2.61411258 | -1.886764473 | 0.060323 | 0.08009 | -5.5752542  |
| GIT2     | -0.131844106 | 2.73743908 | -1.886498661 | 0.060359 | 0.08014 | -5.57574868 |
| ZFR2     | -0.13322173  | 0.51115973 | -1.886312873 | 0.060384 | 0.08016 | -5.57609426 |
| PURB     | -0.122854019 | 4.83792665 | -1.885810837 | 0.060452 | 0.08025 | -5.5770279  |
| B3GLCT   | -0.125253434 | 3.59054332 | -1.885661074 | 0.060472 | 0.08027 | -5.57730637 |
| EIF5AL1  | -0.224816278 | 1.4538969  | -1.885521112 | 0.060491 | 0.08029 | -5.5775666  |
| CHRM5    | -0.05393517  | 0.10363094 | -1.885422639 | 0.060504 | 0.0803  | -5.57774967 |
| ACTG2    | -0.268865476 | 2.00403258 | -1.88532852  | 0.060517 | 0.08031 | -5.57792465 |
| CCER2    | -0.167100554 | 1.07413948 | -1.884613524 | 0.060614 | 0.08043 | -5.57925359 |
| PRR14L   | -0.142111235 | 3.07520439 | -1.884358795 | 0.060648 | 0.08047 | -5.57972693 |
| RNMT     | -0.158601664 | 4.54264293 | -1.884025034 | 0.060694 | 0.08052 | -5.58034703 |
| ARID2    | -0.128133943 | 3.17989194 | -1.883976689 | 0.0607   | 0.08053 | -5.58043684 |
| C17orf78 | -0.02470803  | 0.12923125 | -1.883901054 | 0.060711 | 0.08053 | -5.58057735 |
| F11R     | -0.154440614 | 6.61070678 | -1.883549186 | 0.060758 | 0.08059 | -5.58123093 |
| NSG2     | -0.034746157 | 0.10245385 | -1.883373341 | 0.060782 | 0.08062 | -5.58155752 |
| SPATA6I  | -0.102619176 | 1.48936014 | -1.883007222 | 0.060832 | 0.08068 | -5.58223739 |
| MDGA2    | -0.018987075 | 0.02552444 | -1.882139139 | 0.06095  | 0.08083 | -5.58384887 |
| ECM1     | -0.545033074 | 5.23068092 | -1.881221251 | 0.061076 | 0.08099 | -5.58555203 |
| NEURL3   | 0.066892255  | 0.19961515 | 1.881152817  | 0.061085 | 0.08099 | -5.58567898 |
| KHDRBS   | 0.138718431  | 1.71411201 | 1.880908896  | 0.061118 | 0.08103 | -5.58613142 |
| PADI4    | 0.035471233  | 0.096499   | 1.880352046  | 0.061194 | 0.08113 | -5.58716411 |
| RXFP4    | -0.048547438 | 0.28742402 | -1.879971221 | 0.061247 | 0.08119 | -5.58787018 |
| AUTS2    | 0.211686005  | 3.09795487 | 1.878718885  | 0.061418 | 0.08141 | -5.5901911  |
| COL19A1  | 0.153018831  | 0.53268375 | 1.878593447  | 0.061435 | 0.08143 | -5.59042349 |
| MAP3K2   | -0.146792145 | 4.33489518 | -1.878391638 | 0.061463 | 0.08146 | -5.59079733 |
| AGAP6    | -0.161651323 | 2.57934523 | -1.877802483 | 0.061544 | 0.08156 | -5.59188849 |

|         |              |            |              |          |         |             |
|---------|--------------|------------|--------------|----------|---------|-------------|
| ELL3    | 0.07801132   | 0.84687062 | 1.877035847  | 0.061649 | 0.08169 | -5.59330787 |
| SIPA1   | 0.146623387  | 4.74166207 | 1.876839595  | 0.061676 | 0.08172 | -5.59367112 |
| RANGAF  | -0.139063854 | 5.47808121 | -1.875825319 | 0.061816 | 0.0819  | -5.59554793 |
| RBMS2   | 0.146586894  | 5.22819045 | 1.875655568  | 0.06184  | 0.08192 | -5.59586193 |
| UBXN4   | -0.158199267 | 6.4757991  | -1.875289074 | 0.06189  | 0.08198 | -5.59653979 |
| CX3CL1  | 0.181206256  | 5.65543075 | 1.874642998  | 0.06198  | 0.0821  | -5.59773443 |
| USB1    | -0.11661945  | 4.76270022 | -1.874258215 | 0.062033 | 0.08216 | -5.59844573 |
| PPA1    | -0.148520905 | 6.245485   | -1.874224334 | 0.062037 | 0.08216 | -5.59850836 |
| HYAL3   | -0.127005508 | 2.19887426 | -1.874150049 | 0.062048 | 0.08217 | -5.59864566 |
| HOXD10  | 0.115376058  | 0.28726359 | 1.87284898   | 0.062228 | 0.0824  | -5.6010496  |
| NT5C1A  | -0.181473025 | 0.92128246 | -1.87268241  | 0.062251 | 0.08242 | -5.60135725 |
| RHEX    | 0.273386033  | 2.83361993 | 1.872536664  | 0.062271 | 0.08244 | -5.60162642 |
| MX2     | 0.164269052  | 1.49899531 | 1.872524228  | 0.062273 | 0.08244 | -5.60164938 |
| FBXL19  | -0.128569871 | 3.89752019 | -1.870644984 | 0.062534 | 0.08278 | -5.60511815 |
| PLA2G1E | -0.048387016 | 0.20688165 | -1.870346328 | 0.062576 | 0.08283 | -5.60566911 |
| REPS1   | -0.111924935 | 3.62211204 | -1.86968272  | 0.062668 | 0.08294 | -5.60689301 |
| TAGLN   | -0.228697545 | 5.90746791 | -1.869248919 | 0.062729 | 0.08302 | -5.60769285 |
| DAPK1   | 0.221000299  | 2.7566151  | 1.868151535  | 0.062882 | 0.08321 | -5.6097154  |
| PYGL    | 0.179677334  | 3.53537587 | 1.867777211  | 0.062935 | 0.08328 | -5.61040504 |
| ADRA1B  | -0.240172759 | 2.78780622 | -1.867525358 | 0.06297  | 0.08332 | -5.61086897 |
| LINGO4  | -0.157638277 | 1.24498063 | -1.867395972 | 0.062988 | 0.08333 | -5.61110728 |
| ROBO2   | -0.057599657 | 0.13888062 | -1.866678872 | 0.063089 | 0.08346 | -5.6124278  |
| DDX11   | -0.17468974  | 2.22706216 | -1.866531693 | 0.063109 | 0.08348 | -5.61269876 |
| MYO15A  | -0.057358386 | 0.43582713 | -1.866439528 | 0.063122 | 0.08349 | -5.61286843 |
| HDC     | 0.054098724  | 0.15539838 | 1.865627588  | 0.063236 | 0.08364 | -5.61436281 |
| HUWE1   | -0.160882661 | 5.40360776 | -1.865547548 | 0.063247 | 0.08364 | -5.61451009 |
| PDZD8   | -0.164403539 | 3.46804753 | -1.86528104  | 0.063285 | 0.08369 | -5.61500044 |
| ELF1    | -0.213321942 | 5.76925531 | -1.864068823 | 0.063456 | 0.08391 | -5.61722995 |
| ANKRD2  | -0.093934721 | 0.79721673 | -1.863285289 | 0.063566 | 0.08405 | -5.61867027 |
| SON     | -0.154481987 | 5.84879161 | -1.862161412 | 0.063725 | 0.08425 | -5.6207352  |
| FCRLB   | 0.182769589  | 1.4898694  | 1.861986296  | 0.06375  | 0.08428 | -5.62105684 |
| DNAJC2  | -0.132744921 | 4.25241526 | -1.861789318 | 0.063778 | 0.08431 | -5.62141859 |
| TRPC5O  | 0.021157451  | 0.07616399 | 1.86120215   | 0.063861 | 0.08441 | -5.62249672 |
| CBLN2   | -0.015011263 | 0.02761291 | -1.860941909 | 0.063898 | 0.08445 | -5.62297446 |
| CRTC3   | -0.128484686 | 4.18499423 | -1.860912046 | 0.063902 | 0.08445 | -5.62302927 |
| TLCD2   | 0.164606586  | 2.57607232 | 1.86053807   | 0.063955 | 0.08451 | -5.62371567 |
| CCDC97  | -0.122757729 | 5.10814542 | -1.859852072 | 0.064052 | 0.08464 | -5.62497441 |
| ALG10B  | -0.110755297 | 2.06222078 | -1.859098895 | 0.06416  | 0.08477 | -5.62635589 |
| KBTBD1  | -0.029433989 | 0.09178179 | -1.858095451 | 0.064302 | 0.08495 | -5.62819557 |
| RTL4    | 0.415754276  | 2.47402159 | 1.85663822   | 0.06451  | 0.08522 | -5.63086549 |

|         |              |            |              |          |         |             |
|---------|--------------|------------|--------------|----------|---------|-------------|
| LASP1   | 0.15895522   | 6.43439836 | 1.856572569  | 0.06452  | 0.08523 | -5.63098572 |
| JCAD    | -0.206794414 | 5.26525803 | -1.856373944 | 0.064548 | 0.08526 | -5.63134947 |
| CTRC    | -0.126521647 | 0.34831429 | -1.856189179 | 0.064575 | 0.08529 | -5.6316878  |
| GZMB    | 0.257353039  | 1.85801596 | 1.855860257  | 0.064622 | 0.08534 | -5.63229002 |
| NXF1    | -0.165156526 | 5.73072779 | -1.855690794 | 0.064646 | 0.08537 | -5.63260025 |
| NAGPA   | -0.100210673 | 3.21017314 | -1.855380633 | 0.06469  | 0.08542 | -5.63316798 |
| BPTF    | -0.168511766 | 3.90379349 | -1.855317766 | 0.064699 | 0.08542 | -5.63328304 |
| ZNF699  | 0.141735165  | 1.29142065 | 1.855279989  | 0.064705 | 0.08543 | -5.63335218 |
| MAATS1  | -0.164497164 | 2.66327057 | -1.854402862 | 0.06483  | 0.08558 | -5.63495711 |
| SBF2    | -0.171831612 | 3.46040764 | -1.854217337 | 0.064857 | 0.08561 | -5.63529648 |
| OR2C1   | -0.039802697 | 0.21350219 | -1.854176885 | 0.064863 | 0.08561 | -5.63537048 |
| TMEM10  | -0.150335753 | 4.35148656 | -1.853932693 | 0.064898 | 0.08565 | -5.6358171  |
| RFC3    | -0.136460288 | 3.1019549  | -1.85390953  | 0.064901 | 0.08565 | -5.63585947 |
| ZRANB1  | -0.184020927 | 3.21772491 | -1.85380004  | 0.064917 | 0.08567 | -5.6360597  |
| CCDC18  | -0.170484376 | 3.80860784 | -1.85360176  | 0.064946 | 0.0857  | -5.63642229 |
| TNNT3   | -0.128836605 | 0.46057219 | -1.852898581 | 0.065047 | 0.08582 | -5.63770786 |
| OSBPL3  | 0.156287733  | 4.03765748 | 1.852856291  | 0.065053 | 0.08582 | -5.63778516 |
| SEC24B  | -0.146354484 | 4.72057354 | -1.852318463 | 0.06513  | 0.08592 | -5.6387681  |
| TSPOAP  | -0.16597262  | 2.85985696 | -1.85210009  | 0.065162 | 0.08595 | -5.63916711 |
| TLR1    | 0.143131771  | 1.35138736 | 1.851782348  | 0.065207 | 0.08601 | -5.63974762 |
| SCN1A   | 0.031293591  | 0.04613524 | 1.851367629  | 0.065267 | 0.08608 | -5.64050516 |
| TMEM61  | 0.159582268  | 1.10026076 | 1.850107705  | 0.065449 | 0.08631 | -5.64280555 |
| TSLP    | -0.171549848 | 0.86080574 | -1.849775536 | 0.065497 | 0.08637 | -5.64341178 |
| PPP1R2  | -0.126929783 | 4.5867497  | -1.849425475 | 0.065548 | 0.08643 | -5.64405054 |
| PLK4    | 0.103072514  | 1.56422504 | 1.848815905  | 0.065636 | 0.08654 | -5.64516256 |
| ARL6IP5 | -0.141603418 | 7.70486085 | -1.848477818 | 0.065685 | 0.0866  | -5.64577916 |
| RGS2    | 0.279859651  | 3.72351548 | 1.848050673  | 0.065747 | 0.08667 | -5.64655804 |
| MTMR1   | -0.127593858 | 4.03407146 | -1.847860956 | 0.065775 | 0.0867  | -5.64690392 |
| CNNM4   | -0.164741262 | 4.08902086 | -1.847635172 | 0.065808 | 0.08674 | -5.64731551 |
| RGS19   | -0.123874904 | 4.26865862 | -1.847308347 | 0.065855 | 0.0868  | -5.64791121 |
| HEXD    | -0.161087109 | 4.43724211 | -1.846447613 | 0.06598  | 0.08695 | -5.64947956 |
| HSD17B  | -0.034558214 | 0.18204833 | -1.846384775 | 0.06599  | 0.08696 | -5.64959403 |
| SMAP2   | -0.154333863 | 5.25683009 | -1.845087618 | 0.066179 | 0.0872  | -5.65195618 |
| FAM168  | -0.141996935 | 5.20078827 | -1.844821525 | 0.066218 | 0.08725 | -5.65244054 |
| MAB21L  | -0.212302702 | 1.40268373 | -1.844614997 | 0.066248 | 0.08727 | -5.65281642 |
| NAALAD  | -0.079101446 | 0.46097567 | -1.84460046  | 0.06625  | 0.08727 | -5.65284288 |
| TRIP13  | 0.097551466  | 1.00253267 | 1.844040925  | 0.066332 | 0.08738 | -5.65386104 |
| SPATA2  | -0.145206296 | 4.35654643 | -1.842283129 | 0.066589 | 0.08771 | -5.65705767 |
| TOP2A   | 0.219762929  | 2.43678557 | 1.841717225  | 0.066672 | 0.08781 | -5.65808615 |
| RIN3    | 0.125964646  | 2.61586261 | 1.84159208   | 0.066691 | 0.08783 | -5.65831355 |

|         |               |            |              |          |         |             |
|---------|---------------|------------|--------------|----------|---------|-------------|
| GABBR1  | 0.171823311   | 2.89037229 | 1.84102788   | 0.066774 | 0.08793 | -5.65933857 |
| OTULINL | -0.215005476  | 3.22473101 | -1.840086994 | 0.066912 | 0.08811 | -5.66104726 |
| BBOX1   | -0.297991366  | 2.79864366 | -1.839699292 | 0.066969 | 0.08817 | -5.66175109 |
| LILRA5  | 0.131092899   | 0.93637137 | 1.839534376  | 0.066993 | 0.0882  | -5.66205044 |
| RELCH   | -0.13006605   | 3.73643089 | -1.838908115 | 0.067086 | 0.08831 | -5.66318695 |
| UHRF1B  | -0.15529542   | 3.23827685 | -1.838346056 | 0.067169 | 0.08842 | -5.66420663 |
| TNFRSF  | -0.197364392  | 2.83362209 | -1.838263484 | 0.067181 | 0.08843 | -5.6643564  |
| NGFR    | 0.420910033   | 3.51922739 | 1.838104499  | 0.067205 | 0.08845 | -5.66464476 |
| TTC21A  | -0.107744758  | 1.74846302 | -1.837321085 | 0.067321 | 0.0886  | -5.66606533 |
| GOLGA8  | -0.010158485  | 0.01401186 | -1.836348128 | 0.067465 | 0.08878 | -5.66782878 |
| HTR7    | 0.058409254   | 0.29277546 | 1.83536098   | 0.067611 | 0.08896 | -5.66961702 |
| INPP5B  | -0.132493036  | 3.07203997 | -1.83516857  | 0.06764  | 0.089   | -5.66996546 |
| ARL14   | 0.192953456   | 0.75007763 | 1.835028253  | 0.067661 | 0.08901 | -5.67021955 |
| SHOC1   | -0.024646074  | 0.14939883 | -1.835026632 | 0.067661 | 0.08901 | -5.67022248 |
| CCN6    | -0.091376561  | 0.50346615 | -1.83497569  | 0.067669 | 0.08901 | -5.67031472 |
| TSC1    | -0.127748616  | 3.71132038 | -1.834939251 | 0.067674 | 0.08901 | -5.6703807  |
| TMEM26  | -0.08836367   | 0.45488822 | -1.83464658  | 0.067717 | 0.08906 | -5.67091058 |
| AMHR2   | -0.0671141434 | 0.14273066 | -1.834469199 | 0.067744 | 0.08909 | -5.67123169 |
| HIST1H3 | -0.066004017  | 0.2128808  | -1.834458711 | 0.067745 | 0.08909 | -5.67125067 |
| FGD6    | -0.156274138  | 3.14857918 | -1.834098763 | 0.067799 | 0.08915 | -5.67190218 |
| MGAT4B  | 0.171617135   | 6.44280164 | 1.832303411  | 0.068067 | 0.08949 | -5.67514992 |
| MYC     | 0.261498848   | 3.97834828 | 1.832010198  | 0.068111 | 0.08955 | -5.67568004 |
| GAL3ST2 | -0.071181928  | 0.23334608 | -1.831238105 | 0.068226 | 0.08968 | -5.67707556 |
| NEMF    | -0.150879297  | 3.34835442 | -1.831237986 | 0.068226 | 0.08968 | -5.67707578 |
| NCBP2L  | -0.037901374  | 0.16051908 | -1.831118349 | 0.068244 | 0.0897  | -5.67729196 |
| MS4A1   | 0.317094829   | 1.09204762 | 1.831081239  | 0.06825  | 0.0897  | -5.67735902 |
| VWA3B   | -0.022743853  | 0.03957187 | -1.828512031 | 0.068635 | 0.0902  | -5.68199823 |
| CMTM6   | -0.165679967  | 6.66510923 | -1.826983217 | 0.068866 | 0.0905  | -5.6847558  |
| KLK15   | -0.201235743  | 0.47812726 | -1.82630255  | 0.068968 | 0.09062 | -5.68598281 |
| VEZF1   | -0.156818909  | 5.48231837 | -1.82625688  | 0.068975 | 0.09063 | -5.68606512 |
| KPNA1   | -0.115547522  | 4.11028295 | -1.825964452 | 0.069019 | 0.09068 | -5.68659212 |
| ST14    | 0.156763335   | 7.34550081 | 1.82547185   | 0.069094 | 0.09077 | -5.68747968 |
| ZAN     | -0.020130081  | 0.04047683 | -1.825281677 | 0.069123 | 0.0908  | -5.68782227 |
| FCER2   | 0.184032563   | 0.42224126 | 1.824909645  | 0.069179 | 0.09087 | -5.68849237 |
| ACAP3   | -0.113165834  | 3.29312199 | -1.824683614 | 0.069213 | 0.0909  | -5.68889942 |
| ZDBF2   | 0.153793829   | 2.2879244  | 1.823729378  | 0.069358 | 0.09109 | -5.69061736 |
| CACUL1  | -0.104164283  | 3.73636288 | -1.822903447 | 0.069483 | 0.09124 | -5.69210359 |
| MTTP    | -0.031208775  | 0.10466725 | -1.822592824 | 0.069531 | 0.0913  | -5.69266238 |
| PITX1   | -0.069513814  | 0.10827093 | -1.822553869 | 0.069536 | 0.0913  | -5.69273245 |
| SH2D7   | -0.033881334  | 0.12264266 | -1.822123342 | 0.069602 | 0.09138 | -5.69350676 |

|         |              |            |              |          |         |             |
|---------|--------------|------------|--------------|----------|---------|-------------|
| CD40    | 0.27327744   | 5.35475618 | 1.822034385  | 0.069616 | 0.09139 | -5.69366673 |
| CARD16  | -0.162512641 | 2.50738727 | -1.821424435 | 0.069708 | 0.0915  | -5.69476339 |
| ZFP36   | -0.320551292 | 8.22094658 | -1.821416463 | 0.06971  | 0.0915  | -5.69477772 |
| AMPD3   | -0.149646472 | 2.82522377 | -1.820755285 | 0.06981  | 0.09162 | -5.69596607 |
| ADAM20  | -0.022317426 | 0.14757735 | -1.819566031 | 0.069992 | 0.09186 | -5.69810248 |
| ZNF322  | -0.122216374 | 1.97626736 | -1.819414181 | 0.070015 | 0.09188 | -5.69837517 |
| SHISA3  | 0.281043154  | 1.67961576 | 1.818711905  | 0.070123 | 0.09201 | -5.69963602 |
| PCDHB1  | -0.104047102 | 0.75522557 | -1.817433553 | 0.070319 | 0.09226 | -5.70192993 |
| EBLN2   | 0.110421465  | 0.88452637 | 1.817428796  | 0.070319 | 0.09226 | -5.70193846 |
| TCF12   | -0.152710844 | 4.27928113 | -1.816837674 | 0.07041  | 0.09237 | -5.70299865 |
| IQSEC3  | 0.217322163  | 1.08716285 | 1.816701441  | 0.070431 | 0.09239 | -5.70324294 |
| CDK5RA  | 0.221259606  | 4.64120106 | 1.816667793  | 0.070436 | 0.09239 | -5.70330328 |
| SH3TC2  | 0.04801447   | 0.22605507 | 1.816235238  | 0.070503 | 0.09247 | -5.70407879 |
| ANGPTL  | 0.193775773  | 4.02701239 | 1.815982184  | 0.070542 | 0.09251 | -5.7045324  |
| EZHIP   | -0.033608525 | 0.1301522  | -1.815849811 | 0.070562 | 0.09253 | -5.70476966 |
| ART4    | -0.126529261 | 0.60532686 | -1.815049348 | 0.070685 | 0.09269 | -5.70620401 |
| SH2D4A  | 0.180324468  | 5.26216197 | 1.814231977  | 0.070812 | 0.09284 | -5.70766802 |
| KNOP1   | -0.102172445 | 2.67511039 | -1.813221517 | 0.070968 | 0.09304 | -5.70947699 |
| MKLN1   | -0.157249695 | 3.06181218 | -1.812766128 | 0.071038 | 0.09313 | -5.71029193 |
| TRANK1  | 0.174834246  | 3.63939395 | 1.812405103  | 0.071094 | 0.09319 | -5.71093785 |
| EIF3A   | -0.194264174 | 6.54851701 | -1.81227813  | 0.071114 | 0.09321 | -5.7111165  |
| C7orf57 | 0.081984944  | 0.52275869 | 1.811162905  | 0.071287 | 0.09343 | -5.71315937 |
| CDKL2   | 0.209550427  | 2.27346164 | 1.810675012  | 0.071362 | 0.09352 | -5.7140315  |
| MECP2   | -0.119268056 | 3.85050698 | -1.810602931 | 0.071374 | 0.09353 | -5.71416033 |
| RUFY4   | 0.087163208  | 0.28176213 | 1.809935353  | 0.071477 | 0.09366 | -5.71535324 |
| GPR15   | 0.063837243  | 0.15693738 | 1.809913514  | 0.071481 | 0.09366 | -5.71539226 |
| HOXB4   | 0.086985075  | 0.74227146 | 1.809877011  | 0.071486 | 0.09366 | -5.71545747 |
| ATP8A1  | 0.21476687   | 5.12723252 | 1.808524957  | 0.071697 | 0.09393 | -5.71787209 |
| FOXA1   | 0.098612677  | 0.33863475 | 1.806829532  | 0.071962 | 0.09427 | -5.72089745 |
| ADORA1  | 0.267327161  | 4.51657598 | 1.805861737  | 0.072113 | 0.09446 | -5.72262317 |
| ZNF646  | -0.108778056 | 3.27200897 | -1.803798846 | 0.072437 | 0.09487 | -5.72629859 |
| APOA2   | -0.150989665 | 0.36089587 | -1.802495035 | 0.072643 | 0.09513 | -5.72861946 |
| HPGD    | -0.175426277 | 1.07282504 | -1.802427382 | 0.072653 | 0.09514 | -5.72873984 |
| EFNA5   | 0.145260818  | 0.98563112 | 1.802107635  | 0.072704 | 0.0952  | -5.72930874 |
| IGF1R   | 0.197028127  | 4.70934902 | 1.802062898  | 0.072711 | 0.0952  | -5.72938833 |
| CCDC80  | 0.322209095  | 4.87102921 | 1.80177026   | 0.072757 | 0.09525 | -5.7299089  |
| ZNF581  | 0.146052273  | 5.5165074  | 1.801769742  | 0.072757 | 0.09525 | -5.72990982 |
| ZBTB44  | -0.130788471 | 3.90905169 | -1.800244087 | 0.072998 | 0.09556 | -5.73262244 |
| VNN3    | 0.017204669  | 0.04714111 | 1.799766111  | 0.073074 | 0.09565 | -5.73347183 |
| GOLGA8  | -0.349442301 | 4.81821408 | -1.799706142 | 0.073083 | 0.09565 | -5.73357838 |



|         |              |            |              |          |         |             |
|---------|--------------|------------|--------------|----------|---------|-------------|
| SSUH2   | -0.078855829 | 0.45029693 | -1.797093453 | 0.073498 | 0.09619 | -5.7382172  |
| CEPT1   | -0.143196704 | 3.19489169 | -1.796560033 | 0.073583 | 0.09629 | -5.73916348 |
| CDCA3   | -0.098942152 | 1.09624356 | -1.795488616 | 0.073754 | 0.09651 | -5.74106332 |
| LGR4    | -0.191811577 | 4.25190202 | -1.79531152  | 0.073782 | 0.09654 | -5.74137725 |
| SH3YL1  | -0.149365882 | 4.32961985 | -1.794657897 | 0.073887 | 0.09667 | -5.7425356  |
| VSIG10  | 0.124574187  | 4.27398372 | 1.794223755  | 0.073956 | 0.09675 | -5.74330477 |
| ZNF543  | -0.121725074 | 2.44642996 | -1.79406949  | 0.073981 | 0.09678 | -5.74357803 |
| SMURF2  | 0.14190037   | 4.35890385 | 1.793821172  | 0.074021 | 0.09682 | -5.74401785 |
| DLGAP3  | -0.158733379 | 0.88810124 | -1.79379221  | 0.074025 | 0.09682 | -5.74406915 |
| TMPO    | 0.139579296  | 4.08492795 | 1.79368469   | 0.074043 | 0.09683 | -5.74425957 |
| MGST1   | -0.232003119 | 6.69154249 | -1.793441206 | 0.074082 | 0.09688 | -5.74469074 |
| THRB    | 0.138629475  | 1.98878526 | 1.793299728  | 0.074104 | 0.0969  | -5.74494125 |
| FAHD2B  | -0.101595832 | 1.00481629 | -1.793252268 | 0.074112 | 0.0969  | -5.74502528 |
| CHST6   | 0.109787714  | 0.51264508 | 1.793098994  | 0.074136 | 0.09693 | -5.74529665 |
| SLC35G4 | -0.03595478  | 0.19648229 | -1.792255293 | 0.074272 | 0.0971  | -5.74678999 |
| FGF7    | -0.262087197 | 1.17081399 | -1.790507246 | 0.074553 | 0.09746 | -5.74988183 |
| COX6B2  | 0.060418215  | 0.13978353 | 1.790298301  | 0.074587 | 0.09749 | -5.7502512  |
| ANGPTL  | 0.017314729  | 0.08185416 | 1.790148554  | 0.074611 | 0.09752 | -5.75051589 |
| SLC44A4 | -0.285245076 | 1.59189146 | -1.789865273 | 0.074656 | 0.09757 | -5.75101657 |
| HIPK2   | 0.173605258  | 4.55208882 | 1.789703879  | 0.074682 | 0.0976  | -5.75130179 |
| NXNL2   | 0.163247147  | 1.02434683 | 1.789650153  | 0.074691 | 0.0976  | -5.75139673 |
| PTK6    | 0.080312405  | 0.74978945 | 1.789495743  | 0.074716 | 0.09762 | -5.75166957 |
| PCDHB1  | -0.169189291 | 1.82188579 | -1.789124532 | 0.074776 | 0.09769 | -5.7523254  |
| GCC2    | -0.166633225 | 3.56833763 | -1.788002205 | 0.074957 | 0.09792 | -5.75430746 |
| CRACR2  | -0.192446299 | 3.06732252 | -1.787982772 | 0.07496  | 0.09792 | -5.75434177 |
| RSPO2   | -0.070000528 | 0.09340174 | -1.787538081 | 0.075032 | 0.09801 | -5.75512676 |
| PCDHA7  | 0.038307731  | 0.16137726 | 1.787344516  | 0.075064 | 0.09804 | -5.7554684  |
| NYNRIN  | -0.252588395 | 4.43208271 | -1.786967295 | 0.075125 | 0.09811 | -5.75613407 |
| WASHC2  | -0.113247709 | 4.19042482 | -1.786940668 | 0.075129 | 0.09811 | -5.75618105 |
| KPNA2   | -0.141784786 | 4.69646437 | -1.786575273 | 0.075188 | 0.09818 | -5.75682571 |
| SLC44A2 | -0.128665399 | 7.09919714 | -1.786546559 | 0.075193 | 0.09818 | -5.75687637 |
| GDF5    | -0.141516259 | 0.90140224 | -1.785954566 | 0.075289 | 0.0983  | -5.75792052 |
| ING1    | -0.096953008 | 2.93749317 | -1.785238735 | 0.075405 | 0.09844 | -5.75918265 |
| CLASP1  | -0.130624133 | 4.30435014 | -1.785139311 | 0.075422 | 0.09845 | -5.75935792 |
| DR1     | -0.116218123 | 4.00626949 | -1.784981714 | 0.075447 | 0.09848 | -5.75963571 |
| PGGHG   | -0.338665221 | 3.72589817 | -1.784830488 | 0.075472 | 0.09851 | -5.75990224 |
| CDH15   | 0.093801833  | 0.38934713 | 1.784495771  | 0.075526 | 0.09857 | -5.7604921  |
| S1PR3   | 0.158928843  | 2.37044868 | 1.783315954  | 0.075719 | 0.09881 | -5.7625704  |
| RP1L1   | -0.013193151 | 0.06404293 | -1.782965103 | 0.075776 | 0.09888 | -5.76318818 |
| LMNB2   | -0.132751674 | 4.67202286 | -1.782909186 | 0.075785 | 0.09888 | -5.76328663 |

|         |              |            |              |          |         |             |
|---------|--------------|------------|--------------|----------|---------|-------------|
| RASSF7  | -0.161404051 | 4.52412126 | -1.782874259 | 0.075791 | 0.09888 | -5.76334812 |
| HOXB5   | -0.117580767 | 0.77579659 | -1.782738337 | 0.075813 | 0.0989  | -5.76358741 |
| HCFC1   | -0.137439643 | 4.71188449 | -1.782395597 | 0.075869 | 0.09897 | -5.76419072 |
| NHSL1   | 0.1107215    | 1.58000995 | 1.782353076  | 0.075876 | 0.09897 | -5.76426556 |
| CNN1    | -0.242942403 | 2.73108637 | -1.782342334 | 0.075877 | 0.09897 | -5.76428446 |
| MYLPF   | 0.167447138  | 1.29472396 | 1.78215739   | 0.075908 | 0.099   | -5.76460995 |
| LIG4    | -0.155424142 | 3.51526784 | -1.781210081 | 0.076063 | 0.09919 | -5.76627665 |
| F8A3    | -0.013473621 | 0.04214564 | -1.781035999 | 0.076091 | 0.09922 | -5.76658284 |
| FAM110C | -0.168125991 | 4.33888107 | -1.780910617 | 0.076112 | 0.09924 | -5.76680335 |
| ZNF648  | -0.037667832 | 0.06773657 | -1.780813501 | 0.076128 | 0.09925 | -5.76697414 |
| NIBAN2  | 0.171693841  | 7.94415054 | 1.780039398  | 0.076255 | 0.09941 | -5.76833516 |
| MTF2    | -0.129547808 | 3.63634149 | -1.779392961 | 0.076361 | 0.09954 | -5.76947127 |
| CCDC16  | -0.02690884  | 0.0741303  | -1.777831376 | 0.076618 | 0.09987 | -5.77221411 |
| UTS2R   | -0.293802395 | 1.40678725 | -1.77619537  | 0.076887 | 0.10021 | -5.77508514 |
| SLC10A6 | -0.136406918 | 0.94197333 | -1.775362515 | 0.077025 | 0.10039 | -5.77654573 |
| URB1    | -0.141976132 | 3.41878627 | -1.774400382 | 0.077184 | 0.10058 | -5.7782322  |
| SNX32   | -0.065959625 | 0.56269238 | -1.774393895 | 0.077185 | 0.10058 | -5.77824357 |
| DSCC1   | -0.082221304 | 1.45709236 | -1.774110776 | 0.077232 | 0.10063 | -5.77873966 |
| RNF43   | 0.147666963  | 2.02401877 | 1.77355134   | 0.077325 | 0.10075 | -5.7797197  |
| RAP1GA  | 0.157536039  | 3.73089072 | 1.773135863  | 0.077394 | 0.10082 | -5.78044735 |
| ZBTB8B  | -0.031848928 | 0.14850206 | -1.773118374 | 0.077397 | 0.10082 | -5.78047798 |
| OMG     | 0.038977735  | 0.27955813 | 1.772520459  | 0.077496 | 0.10095 | -5.78152484 |
| TRIM23  | -0.123855036 | 3.59749246 | -1.771847837 | 0.077608 | 0.10108 | -5.7827021  |
| KCNS1   | -0.121349352 | 0.28565129 | -1.77062535  | 0.077812 | 0.10134 | -5.78484064 |
| S100A14 | -0.197211111 | 8.49263077 | -1.769729081 | 0.077962 | 0.10152 | -5.7864076  |
| SNORC   | 0.116618775  | 0.96403991 | 1.769723706  | 0.077963 | 0.10152 | -5.78641699 |
| ANGPTL  | 0.298594299  | 5.37973465 | 1.769027031  | 0.078079 | 0.10167 | -5.78763446 |
| NLRP14  | -0.031303467 | 0.14687279 | -1.768659996 | 0.07814  | 0.10174 | -5.78827568 |
| SST     | 0.180549996  | 0.3708912  | 1.768631716  | 0.078145 | 0.10174 | -5.78832509 |
| PKP3    | -0.165473423 | 4.77230874 | -1.768415543 | 0.078181 | 0.10178 | -5.78870268 |
| RBFOX3  | -0.058461825 | 0.07003029 | -1.767655566 | 0.078309 | 0.10193 | -5.79002979 |
| STK38L  | -0.134772074 | 3.52501501 | -1.76713295  | 0.078396 | 0.10204 | -5.79094209 |
| ITSN2   | -0.162851074 | 4.91650388 | -1.766299206 | 0.078536 | 0.10221 | -5.79239695 |
| PAM     | 0.193581636  | 6.78268392 | 1.765800558  | 0.07862  | 0.10232 | -5.79326676 |
| ANKDD1  | -0.157161862 | 1.27422765 | -1.765680647 | 0.07864  | 0.10233 | -5.79347589 |
| CD8B    | 0.275878245  | 1.80895358 | 1.765126724  | 0.078734 | 0.10245 | -5.79444178 |
| ZFP57   | 0.14929649   | 0.3759102  | 1.765005338  | 0.078754 | 0.10247 | -5.7946534  |
| TPM3    | -0.12731188  | 6.33612315 | -1.76443103  | 0.078851 | 0.10258 | -5.79565445 |
| GK3P    | 0.013923498  | 0.03778632 | 1.76333028   | 0.079037 | 0.10282 | -5.79757222 |
| PPAN-P2 | -0.024753295 | 0.14159055 | -1.763126137 | 0.079071 | 0.10286 | -5.79792776 |

|         |              |            |              |          |         |             |
|---------|--------------|------------|--------------|----------|---------|-------------|
| NPY     | -0.264143097 | 0.79262684 | -1.762903883 | 0.079109 | 0.1029  | -5.7983148  |
| GPR55   | 0.14436942   | 0.58190727 | 1.761334308  | 0.079375 | 0.10323 | -5.80104672 |
| SHISA5  | -0.130999639 | 7.00048655 | -1.761038692 | 0.079425 | 0.10329 | -5.80156099 |
| SEMA4G  | 0.191526471  | 2.96708967 | 1.760756704  | 0.079473 | 0.10335 | -5.80205147 |
| LPAR1   | -0.191764348 | 2.98344139 | -1.759280717 | 0.079723 | 0.10366 | -5.80461751 |
| TRIB3   | -0.332691148 | 3.69990176 | -1.75904724  | 0.079763 | 0.10371 | -5.80502322 |
| EPB42   | -0.02796988  | 0.1223357  | -1.758546391 | 0.079848 | 0.10381 | -5.80589337 |
| COL4A3  | 0.216536953  | 3.77948905 | 1.758276351  | 0.079894 | 0.10386 | -5.80636242 |
| HIST1H2 | -0.137829233 | 1.36797357 | -1.757608289 | 0.080008 | 0.104   | -5.80752253 |
| PPIP5K2 | -0.115714643 | 2.78485293 | -1.757540883 | 0.08002  | 0.10401 | -5.80763955 |
| GNB1L   | -0.101252494 | 1.53916382 | -1.75709626  | 0.080096 | 0.1041  | -5.80841138 |
| SIGLEC7 | 0.160707653  | 1.17755203 | 1.756309052  | 0.08023  | 0.10427 | -5.80977745 |
| PLEKHO  | -0.157170366 | 5.85824881 | -1.755579006 | 0.080355 | 0.10442 | -5.81104378 |
| DRGX    | 0.086035096  | 0.08250883 | 1.754389742  | 0.080559 | 0.10468 | -5.81310557 |
| PRAF2   | -0.13383875  | 6.4303846  | -1.754149758 | 0.0806   | 0.10472 | -5.81352146 |
| ZNF841  | 0.123872083  | 2.76703235 | 1.754107758  | 0.080608 | 0.10472 | -5.81359424 |
| UBE2E2  | 0.147631176  | 4.77436069 | 1.753890227  | 0.080645 | 0.10477 | -5.81397116 |
| HTR3A   | -0.136392632 | 0.38674357 | -1.753080971 | 0.080784 | 0.10494 | -5.81537297 |
| DNAH17  | -0.063838947 | 0.65593821 | -1.753037113 | 0.080792 | 0.10494 | -5.81544892 |
| CSNK1G  | -0.107053471 | 5.34778369 | -1.752541778 | 0.080877 | 0.10503 | -5.81630662 |
| ALOX12E | -0.07546929  | 0.35979712 | -1.752522221 | 0.08088  | 0.10503 | -5.81634048 |
| DISP3   | -0.041262295 | 0.15415248 | -1.752506338 | 0.080883 | 0.10503 | -5.81636798 |
| VPS41   | -0.123277814 | 4.56853458 | -1.752419383 | 0.080898 | 0.10505 | -5.81651852 |
| DAGLB   | -0.103700537 | 3.76742323 | -1.750774738 | 0.081181 | 0.10541 | -5.81936442 |
| NIPSNAP | -0.132680384 | 2.78081644 | -1.750650947 | 0.081203 | 0.10543 | -5.81957852 |
| KCNJ4   | -0.032896003 | 0.09488472 | -1.750409318 | 0.081245 | 0.10547 | -5.81999639 |
| LSR     | 0.149025647  | 7.2868791  | 1.750180918  | 0.081284 | 0.10552 | -5.82039132 |
| MXD3    | -0.13223162  | 1.535755   | -1.750084866 | 0.081301 | 0.10553 | -5.8205574  |
| GAB3    | 0.11502199   | 2.43194124 | 1.750023632  | 0.081311 | 0.10553 | -5.82066327 |
| EFNA3   | -0.145517154 | 2.34855962 | -1.749851386 | 0.081341 | 0.10556 | -5.82096104 |
| RABGGT  | -0.097390644 | 4.69181667 | -1.749296459 | 0.081437 | 0.10568 | -5.82192021 |
| NPHP3   | -0.138777748 | 2.2806589  | -1.749287713 | 0.081439 | 0.10568 | -5.82193532 |
| FBXO21  | -0.159808151 | 5.27895849 | -1.748044992 | 0.081654 | 0.10595 | -5.82408222 |
| CHST5   | -0.025318454 | 0.1319024  | -1.748002548 | 0.081661 | 0.10595 | -5.82415552 |
| DOK5    | -0.214858804 | 2.13994194 | -1.747848644 | 0.081688 | 0.10597 | -5.82442129 |
| DYNC1LI | -0.213966522 | 4.94884534 | -1.747170654 | 0.081806 | 0.10612 | -5.82559181 |
| SLC13A4 | -0.067430104 | 0.46665445 | -1.746644143 | 0.081897 | 0.10623 | -5.82650051 |
| ZNF26   | -0.072348864 | 1.50176308 | -1.746217266 | 0.081972 | 0.10632 | -5.82723705 |
| TMEM13  | -0.133283454 | 3.8689694  | -1.746078812 | 0.081996 | 0.10634 | -5.8274759  |
| BAG5    | -0.128984218 | 5.42460791 | -1.745392804 | 0.082115 | 0.10649 | -5.82865909 |

|         |              |            |              |          |         |             |
|---------|--------------|------------|--------------|----------|---------|-------------|
| SPAG17  | -0.115570832 | 0.73724881 | -1.743343343 | 0.082473 | 0.10694 | -5.83219119 |
| NACA2   | -0.089762217 | 0.76954682 | -1.742983047 | 0.082536 | 0.10702 | -5.83281172 |
| CYP27C  | 0.045399041  | 0.12988185 | 1.742923985  | 0.082547 | 0.10702 | -5.83291343 |
| CDKL4   | -0.05953068  | 0.17037311 | -1.741853266 | 0.082734 | 0.10726 | -5.83475669 |
| XKR9    | -0.099181913 | 0.63431128 | -1.741797406 | 0.082744 | 0.10726 | -5.83485283 |
| KRT3    | -0.077226955 | 0.15816602 | -1.741446813 | 0.082805 | 0.10733 | -5.83545612 |
| PLAGL1  | 0.118472823  | 1.40153444 | 1.741042126  | 0.082877 | 0.10742 | -5.83615235 |
| OIP5    | -0.081315323 | 0.96843931 | -1.740820373 | 0.082915 | 0.10746 | -5.83653379 |
| WEE1    | -0.213810658 | 4.12446989 | -1.739359191 | 0.083173 | 0.10778 | -5.83904601 |
| MKX     | 0.284333035  | 1.61198602 | 1.738952596  | 0.083244 | 0.10787 | -5.8397447  |
| CSDC2   | 0.119684259  | 0.44896254 | 1.738591568  | 0.083308 | 0.10794 | -5.84036496 |
| RPL36   | -0.145368615 | 8.68607913 | -1.738560709 | 0.083313 | 0.10794 | -5.84041797 |
| LIME1   | -0.15081708  | 1.81867332 | -1.737894638 | 0.083431 | 0.10809 | -5.84156195 |
| C1QL3   | -0.150243487 | 1.18657091 | -1.737850088 | 0.083439 | 0.10809 | -5.84163845 |
| LUC7L   | -0.166783573 | 4.51944368 | -1.737703921 | 0.083465 | 0.10811 | -5.84188943 |
| CEACAM  | 0.054175473  | 0.08508875 | 1.737460069  | 0.083508 | 0.10816 | -5.84230809 |
| PHF24   | 0.059898932  | 0.26191254 | 1.737328425  | 0.083531 | 0.10818 | -5.84253408 |
| KLK5    | 0.308734571  | 1.06013111 | 1.736285932  | 0.083715 | 0.10841 | -5.84432314 |
| PITPNM2 | -0.112113117 | 2.02286112 | -1.73556538  | 0.083843 | 0.10857 | -5.84555909 |
| DLG5    | -0.222665608 | 4.356739   | -1.735382416 | 0.083875 | 0.1086  | -5.84587285 |
| PEG10   | 0.268800603  | 3.73742707 | 1.735149612  | 0.083917 | 0.10865 | -5.84627202 |
| CCND1   | 0.215202279  | 8.1201534  | 1.735068497  | 0.083931 | 0.10866 | -5.8464111  |
| ESPL1   | 0.069120806  | 0.51976595 | 1.734060964  | 0.08411  | 0.10888 | -5.84813798 |
| NWD2    | -0.124169436 | 0.16385003 | -1.733873025 | 0.084143 | 0.10892 | -5.84845999 |
| CBX3    | -0.114074771 | 6.34708419 | -1.733166559 | 0.084269 | 0.10907 | -5.84967014 |
| DNPEP   | -0.090103651 | 4.56780356 | -1.732662951 | 0.084359 | 0.10918 | -5.85053251 |
| EGFL8   | -0.113123532 | 1.04905643 | -1.732449077 | 0.084397 | 0.10922 | -5.85089867 |
| TAS2R5  | 0.118127616  | 0.96498607 | 1.731976277  | 0.084481 | 0.10932 | -5.85170796 |
| PRH2    | -0.056958951 | 0.40562951 | -1.731400051 | 0.084584 | 0.10945 | -5.852694   |
| RPS6KA  | -0.100524045 | 4.67489629 | -1.730767935 | 0.084697 | 0.10958 | -5.8537753  |
| SBSN    | -0.247651842 | 0.69509563 | -1.730708091 | 0.084708 | 0.10959 | -5.85387765 |
| PTCRA   | 0.09140781   | 0.46766086 | 1.730218239  | 0.084795 | 0.1097  | -5.8547153  |
| ANGPTL  | 0.06885201   | 0.61988729 | 1.729452465  | 0.084933 | 0.10986 | -5.85602432 |
| RACK1   | -0.103367018 | 9.04544095 | -1.729442889 | 0.084934 | 0.10986 | -5.85604069 |
| ATAD2   | 0.150231654  | 3.29942959 | 1.729231999  | 0.084972 | 0.1099  | -5.85640108 |
| VAX2    | -0.090033035 | 0.53062981 | -1.729175831 | 0.084982 | 0.1099  | -5.85649706 |
| SLC39A2 | -0.065835241 | 0.12385866 | -1.728764718 | 0.085056 | 0.10999 | -5.85719948 |
| LILRA4  | 0.1042767    | 0.39647921 | 1.728589102  | 0.085087 | 0.11002 | -5.85749948 |
| CHD1    | 0.12780306   | 3.46208852 | 1.72839229   | 0.085123 | 0.11006 | -5.85783565 |
| NUTM1   | 0.012284925  | 0.02717117 | 1.728373718  | 0.085126 | 0.11006 | -5.85786738 |

|         |              |            |              |          |         |             |
|---------|--------------|------------|--------------|----------|---------|-------------|
| CCRL2   | -0.116920853 | 1.54160476 | -1.728286947 | 0.085142 | 0.11007 | -5.85801558 |
| TWIST2  | 0.143914928  | 0.84510831 | 1.728247974  | 0.085149 | 0.11007 | -5.85808214 |
| GXYLT1  | -0.13276038  | 3.90352542 | -1.727871084 | 0.085216 | 0.11015 | -5.85872575 |
| TBC1D1  | -0.115535348 | 2.54522517 | -1.727658374 | 0.085254 | 0.11018 | -5.85908893 |
| KIF4A   | 0.113227411  | 1.05646798 | 1.727647321  | 0.085256 | 0.11018 | -5.8591078  |
| ENTPD7  | -0.13113024  | 2.18606309 | -1.727640201 | 0.085258 | 0.11018 | -5.85911996 |
| VSTM1   | 0.074484536  | 0.24115084 | 1.727486287  | 0.085285 | 0.1102  | -5.85938272 |
| SUPT201 | -0.117461956 | 3.65722365 | -1.727368987 | 0.085306 | 0.11022 | -5.85958296 |
| SHFL    | 0.12190794   | 4.43525764 | 1.727071564  | 0.08536  | 0.11028 | -5.86009063 |
| ZNF445  | -0.110763277 | 2.64195371 | -1.726280936 | 0.085502 | 0.11045 | -5.86143972 |
| ANKMY1  | -0.091755951 | 2.17519145 | -1.726270822 | 0.085504 | 0.11045 | -5.86145698 |
| SNCB    | -0.066350952 | 0.09674152 | -1.726168651 | 0.085523 | 0.11047 | -5.86163127 |
| PPP1R31 | -0.198420861 | 5.41559551 | -1.725508692 | 0.085642 | 0.11061 | -5.86275686 |
| ACER1   | -0.038845335 | 0.18089381 | -1.724735961 | 0.085781 | 0.11078 | -5.86407426 |
| XAF1    | 0.165064686  | 1.56722417 | 1.724073568  | 0.085901 | 0.11093 | -5.86520309 |
| SLC15A4 | 0.126997783  | 4.25817095 | 1.723315612  | 0.086038 | 0.1111  | -5.86649425 |
| MED1    | -0.141649236 | 3.87670373 | -1.723169748 | 0.086064 | 0.11112 | -5.86674266 |
| SNX25   | -0.226317178 | 5.37460005 | -1.722252508 | 0.086231 | 0.11133 | -5.86830429 |
| PIKFYVE | -0.143347727 | 3.51071664 | -1.721520175 | 0.086363 | 0.11149 | -5.86955052 |
| FAM171A | -0.150241651 | 3.72070117 | -1.720687687 | 0.086515 | 0.11168 | -5.87096656 |
| RIMS1   | -0.01086063  | 0.03711264 | -1.720581245 | 0.086534 | 0.1117  | -5.87114757 |
| SLC22A1 | -0.081048788 | 0.74723096 | -1.720223814 | 0.086599 | 0.11177 | -5.87175531 |
| MOGAT1  | -0.030409707 | 0.09261933 | -1.720218958 | 0.0866   | 0.11177 | -5.87176356 |
| SEMA5A  | 0.172130831  | 2.05750244 | 1.720162095  | 0.08661  | 0.11177 | -5.87186024 |
| RAB44   | 0.022549708  | 0.1075443  | 1.719423825  | 0.086745 | 0.11194 | -5.87311508 |
| SLC36A2 | 0.016712517  | 0.02456113 | 1.71883276   | 0.086853 | 0.11207 | -5.87411934 |
| TMEM74  | -0.161518025 | 1.93545601 | -1.718190759 | 0.08697  | 0.11221 | -5.87520976 |
| SHMT2   | -0.14480082  | 5.12222196 | -1.718003486 | 0.087004 | 0.11224 | -5.87552777 |
| SCHIP1  | -0.03760981  | 0.24641954 | -1.71749693  | 0.087097 | 0.11236 | -5.87638776 |
| RALGPS  | 0.152521626  | 2.86575062 | 1.717399225  | 0.087115 | 0.11237 | -5.87655361 |
| HELZ2   | 0.145280791  | 3.30311316 | 1.717312012  | 0.08713  | 0.11238 | -5.87670164 |
| TTLL6   | -0.015380934 | 0.0307399  | -1.717091621 | 0.087171 | 0.11243 | -5.87707569 |
| FRMD3   | -0.351729117 | 5.75127568 | -1.716972989 | 0.087193 | 0.11244 | -5.87727702 |
| GFRA4   | -0.127079322 | 0.75984288 | -1.716571528 | 0.087266 | 0.11253 | -5.87795821 |
| TRPV5   | -0.019904797 | 0.02994182 | -1.716354661 | 0.087306 | 0.11257 | -5.87832613 |
| EFNB3   | -0.180414555 | 1.45098013 | -1.716330552 | 0.08731  | 0.11257 | -5.87836703 |
| TSPO    | -0.164440395 | 7.16029838 | -1.716085592 | 0.087355 | 0.11262 | -5.87878254 |
| CHRNE   | 0.122384295  | 1.13475561 | 1.715906917  | 0.087388 | 0.11265 | -5.87908558 |
| ADK     | -0.139351533 | 5.85958852 | -1.715380107 | 0.087484 | 0.11277 | -5.87997889 |
| SFI1    | 0.107405913  | 2.98686385 | 1.714884099  | 0.087576 | 0.11288 | -5.88081973 |

|         |              |            |              |          |         |             |
|---------|--------------|------------|--------------|----------|---------|-------------|
| CDH20   | 0.090856739  | 0.37018903 | 1.714361233  | 0.087672 | 0.11299 | -5.88170584 |
| PCDHGC  | 0.234826284  | 2.55327145 | 1.71430877   | 0.087681 | 0.113   | -5.88179473 |
| SHISA6  | -0.298168317 | 1.60923786 | -1.713876834 | 0.087761 | 0.11309 | -5.88252652 |
| IL1A    | 0.080234079  | 0.3459917  | 1.713560656  | 0.087819 | 0.11316 | -5.88306208 |
| ADCY3   | -0.145196984 | 2.85283449 | -1.712560052 | 0.088003 | 0.11339 | -5.88475631 |
| S100A16 | 0.139399068  | 7.44767481 | 1.71244974   | 0.088024 | 0.1134  | -5.88494303 |
| CRYBB1  | -0.102929459 | 0.92200086 | -1.712355594 | 0.088041 | 0.11342 | -5.88510238 |
| GINS1   | 0.110330464  | 1.62911248 | 1.712203051  | 0.088069 | 0.11344 | -5.88536055 |
| ZNF677  | -0.119961394 | 2.49936131 | -1.712187036 | 0.088072 | 0.11344 | -5.88538765 |
| HHLA2   | -0.021092439 | 0.10045889 | -1.711580432 | 0.088184 | 0.11358 | -5.88641407 |
| MTA1    | -0.114107082 | 4.64736983 | -1.711475303 | 0.088204 | 0.11359 | -5.88659192 |
| METTL2  | -0.229296881 | 3.41766472 | -1.71099105  | 0.088293 | 0.1137  | -5.88741101 |
| GMCL1   | -0.129910956 | 4.11579006 | -1.710553813 | 0.088374 | 0.1138  | -5.88815037 |
| LPIN1   | -0.111847189 | 3.23351502 | -1.709981098 | 0.08848  | 0.11392 | -5.88911856 |
| ZNF880  | -0.134624088 | 3.64607802 | -1.709524686 | 0.088565 | 0.11402 | -5.8898899  |
| ERF     | -0.136887349 | 5.47267601 | -1.708868769 | 0.088686 | 0.11417 | -5.89099805 |
| ZER1    | -0.099553274 | 6.25668869 | -1.708487086 | 0.088757 | 0.11425 | -5.89164271 |
| CLCA2   | 0.124183673  | 0.28692622 | 1.707934904  | 0.08886  | 0.11438 | -5.89257508 |
| TM4SF2  | -0.010977727 | 0.02941716 | -1.707318863 | 0.088974 | 0.11452 | -5.89361493 |
| MCM7    | -0.132944772 | 5.71850887 | -1.706670103 | 0.089095 | 0.11466 | -5.89470961 |
| POC1B-C | -0.015774236 | 0.12756354 | -1.70651734  | 0.089123 | 0.11469 | -5.89496732 |
| CHST15  | 0.19218265   | 5.08260203 | 1.706393927  | 0.089146 | 0.11471 | -5.89517549 |
| MRGPRF  | 0.154335881  | 1.38586242 | 1.706065168  | 0.089208 | 0.11478 | -5.89572998 |
| PCDHB8  | -0.113390012 | 0.46463639 | -1.706030788 | 0.089214 | 0.11478 | -5.89578796 |
| GFRA3   | -0.064420005 | 0.20837292 | -1.705824037 | 0.089253 | 0.11482 | -5.89613661 |
| KHDC1L  | -0.055197606 | 0.16539626 | -1.705695846 | 0.089277 | 0.11484 | -5.89635276 |
| MEOX1   | 0.165809148  | 1.18074665 | 1.70486342   | 0.089432 | 0.11504 | -5.89775597 |
| TPR     | -0.143151062 | 5.01079296 | -1.704189255 | 0.089558 | 0.11519 | -5.89889192 |
| BLM     | 0.080734292  | 1.07115359 | 1.703704207  | 0.089649 | 0.1153  | -5.89970893 |
| LHX6    | -0.11647545  | 1.35110585 | -1.703286218 | 0.089727 | 0.11539 | -5.90041281 |
| GCGR    | -0.2266793   | 0.46271728 | -1.701451478 | 0.090071 | 0.11582 | -5.90350046 |
| CCDC18  | -0.155021755 | 1.19690856 | -1.700641918 | 0.090224 | 0.11601 | -5.90486181 |
| ZNF805  | 0.122207757  | 1.66908762 | 1.700539278  | 0.090243 | 0.11603 | -5.90503437 |
| FGF18   | 0.156973712  | 1.5019549  | 1.700212242  | 0.090304 | 0.1161  | -5.9055841  |
| SS18L1  | -0.106694025 | 3.52427742 | -1.700172661 | 0.090312 | 0.1161  | -5.90565063 |
| ENOX2   | -0.12137144  | 3.20631871 | -1.700064472 | 0.090332 | 0.11611 | -5.90583246 |
| FGD3    | -0.173979809 | 2.44352185 | -1.699259146 | 0.090484 | 0.1163  | -5.90718562 |
| FOXK1   | 0.124406169  | 3.14796906 | 1.698942672  | 0.090544 | 0.11637 | -5.90771721 |
| TSSK4   | -0.134009906 | 1.32229777 | -1.698365986 | 0.090653 | 0.1165  | -5.90868563 |
| RNF19A  | -0.136730561 | 4.26038252 | -1.698323098 | 0.090661 | 0.1165  | -5.90875764 |

|         |              |            |              |          |         |             |
|---------|--------------|------------|--------------|----------|---------|-------------|
| FCGR1B  | -0.099171954 | 0.82733483 | -1.697679541 | 0.090782 | 0.11665 | -5.90983795 |
| CCR10   | -0.104342198 | 0.95133957 | -1.697594545 | 0.090798 | 0.11665 | -5.9099806  |
| ZFXH2   | 0.092883593  | 1.4758393  | 1.697587985  | 0.0908   | 0.11665 | -5.90999161 |
| ZNF484  | -0.11595777  | 2.19445178 | -1.69728077  | 0.090858 | 0.11672 | -5.91050715 |
| ASCC3   | 0.156047774  | 3.60076236 | 1.696234275  | 0.091056 | 0.11696 | -5.9122626  |
| OAZ3    | -0.110601289 | 2.03228104 | -1.696149549 | 0.091072 | 0.11698 | -5.91240467 |
| LONRF3  | -0.196343764 | 2.6472157  | -1.695536217 | 0.091188 | 0.11712 | -5.91343297 |
| DPYD    | 0.201442865  | 4.04313851 | 1.695294938  | 0.091234 | 0.11717 | -5.91383739 |
| CPA5    | -0.052205873 | 0.18082675 | -1.694282922 | 0.091427 | 0.11741 | -5.91553308 |
| HPS5    | -0.125907931 | 3.52279208 | -1.693986846 | 0.091483 | 0.11747 | -5.91602898 |
| POLR3D  | -0.111628572 | 3.77074805 | -1.693726762 | 0.091532 | 0.11752 | -5.91646453 |
| LRRC19  | -0.033347157 | 0.19000429 | -1.693352723 | 0.091604 | 0.11761 | -5.9170908  |
| TRIM67  | -0.026170128 | 0.06235615 | -1.692804903 | 0.091708 | 0.11773 | -5.91800779 |
| CLCN6   | -0.119015196 | 3.39634522 | -1.692340803 | 0.091797 | 0.11784 | -5.91878442 |
| IQCB1   | -0.121025909 | 4.20821602 | -1.692068936 | 0.091849 | 0.11789 | -5.91923927 |
| ENTPD3  | -0.230368382 | 2.85679741 | -1.691992051 | 0.091863 | 0.1179  | -5.91936789 |
| MAGEC3  | 0.069711437  | 0.29313264 | 1.691586884  | 0.091941 | 0.11799 | -5.9200456  |
| HPSE2   | 0.123591378  | 0.64510755 | 1.691143823  | 0.092025 | 0.11809 | -5.9207865  |
| UBQLNL  | -0.0754849   | 0.76725429 | -1.691126174 | 0.092029 | 0.11809 | -5.92081601 |
| WHRN    | -0.120441238 | 2.56919652 | -1.690875401 | 0.092077 | 0.11814 | -5.92123528 |
| CHST4   | 0.040817081  | 0.15675752 | 1.690599607  | 0.092129 | 0.1182  | -5.9216963  |
| ASF1B   | 0.191132123  | 3.2103072  | 1.690334879  | 0.09218  | 0.11826 | -5.92213876 |
| PLSCR3  | 0.063025346  | 0.70215499 | 1.689136759  | 0.09241  | 0.11854 | -5.92414042 |
| TMEM21  | 0.15707471   | 2.16500962 | 1.689091353  | 0.092418 | 0.11854 | -5.92421625 |
| ZC3H12I | 0.115889864  | 1.06139935 | 1.688890397  | 0.092457 | 0.11858 | -5.92455184 |
| EGLN3   | 0.192737334  | 1.38737249 | 1.688787295  | 0.092477 | 0.1186  | -5.924724   |
| CCDC27  | -0.073444638 | 0.44236242 | -1.688515084 | 0.092529 | 0.11866 | -5.92517849 |
| CIART   | 0.213383763  | 3.91873515 | 1.688024131  | 0.092623 | 0.11877 | -5.92599801 |
| SLC3A1  | -0.029500299 | 0.14725441 | -1.686118085 | 0.09299  | 0.11923 | -5.92917747 |
| OSBPL7  | -0.107475058 | 3.3316941  | -1.685437011 | 0.093122 | 0.11939 | -5.93031271 |
| POC1B   | -0.097832286 | 2.83152428 | -1.684872387 | 0.093231 | 0.11952 | -5.93125351 |
| TAPBP   | 0.099921626  | 7.11325014 | 1.684729655  | 0.093258 | 0.11955 | -5.93149128 |
| PCYT1B  | -0.062164319 | 0.11965956 | -1.68468632  | 0.093267 | 0.11955 | -5.93156347 |
| SEC24C  | -0.241736873 | 4.53825415 | -1.6846046   | 0.093283 | 0.11956 | -5.9316996  |
| ASXL1   | -0.120527053 | 4.38576152 | -1.682875267 | 0.093617 | 0.11998 | -5.93457871 |
| ZBTB9   | -0.015435333 | 0.0548771  | -1.682632542 | 0.093664 | 0.12003 | -5.93498259 |
| PLA2G4I | -0.04269314  | 0.06184413 | -1.681697791 | 0.093846 | 0.12026 | -5.9365374  |
| EPHX4   | 0.203963264  | 2.94233675 | 1.680849367  | 0.094011 | 0.12046 | -5.93794789 |
| KCNA3   | 0.139330269  | 0.76281705 | 1.679413143  | 0.09429  | 0.12081 | -5.940334   |
| RC3H2   | -0.134490917 | 3.63710553 | -1.679243038 | 0.094324 | 0.12084 | -5.94061648 |

|         |              |            |              |          |         |             |
|---------|--------------|------------|--------------|----------|---------|-------------|
| CASP7   | -0.115987829 | 3.93844324 | -1.676850432 | 0.094791 | 0.12142 | -5.94458668 |
| MYBPHL  | 0.151631124  | 0.8114695  | 1.676845649  | 0.094792 | 0.12142 | -5.94459461 |
| DEPP1   | 0.215264133  | 5.72480902 | 1.676462548  | 0.094867 | 0.12151 | -5.9452298  |
| IGFBP2  | -0.206843325 | 4.29202462 | -1.676444965 | 0.094871 | 0.12151 | -5.94525895 |
| CCP110  | -0.115347584 | 2.48594461 | -1.675990944 | 0.09496  | 0.12161 | -5.94601154 |
| CCDC62  | 0.035225285  | 0.25713744 | 1.67530593   | 0.095094 | 0.12177 | -5.94714663 |
| AHDC1   | -0.132340812 | 5.02231274 | -1.675275156 | 0.0951   | 0.12177 | -5.94719762 |
| CAV1    | 0.283642847  | 7.21572517 | 1.674366853  | 0.095279 | 0.12199 | -5.94870199 |
| ZFH3    | -0.147024268 | 3.91000739 | -1.673922495 | 0.095366 | 0.12209 | -5.94943766 |
| MACROI  | 0.281462483  | 2.27257948 | 1.673711084  | 0.095408 | 0.12214 | -5.9497876  |
| SUGCT   | 0.163691453  | 1.91116557 | 1.673268877  | 0.095495 | 0.12224 | -5.95051944 |
| ZNF117  | 0.132216497  | 2.76335929 | 1.673145277  | 0.095519 | 0.12226 | -5.95072395 |
| UCP1    | -0.035171708 | 0.15080213 | -1.673089071 | 0.09553  | 0.12227 | -5.95081695 |
| ARSB    | -0.117762677 | 2.74189268 | -1.672316276 | 0.095683 | 0.12245 | -5.95209531 |
| LRRC3   | -0.105486658 | 0.96635663 | -1.671863278 | 0.095772 | 0.12256 | -5.95284438 |
| TGFBI   | 0.267759867  | 4.82943192 | 1.670883229  | 0.095966 | 0.12279 | -5.95446431 |
| RLN1    | -0.078142758 | 0.76503998 | -1.670882701 | 0.095966 | 0.12279 | -5.95446519 |
| LRAT    | -0.142714801 | 2.07209352 | -1.670777907 | 0.095987 | 0.12281 | -5.95463835 |
| QSOX2   | -0.163283114 | 4.31170862 | -1.670277162 | 0.096086 | 0.12292 | -5.95546562 |
| FLT3LG  | 0.104423161  | 1.68105923 | 1.668673935  | 0.096403 | 0.12332 | -5.95811266 |
| CTRB2   | -0.028767717 | 0.07600598 | -1.668145158 | 0.096508 | 0.12344 | -5.95898517 |
| TNFAIP3 | 0.203678681  | 3.44396551 | 1.667951081  | 0.096547 | 0.12349 | -5.95930533 |
| C4A     | 0.286352833  | 4.01150263 | 1.666087908  | 0.096918 | 0.12395 | -5.96237714 |
| PDLIM1  | 0.209467053  | 8.64537349 | 1.664414566  | 0.097252 | 0.12437 | -5.9651331  |
| WNT1    | 0.048258383  | 0.17863052 | 1.664300839  | 0.097275 | 0.12439 | -5.96532031 |
| RIF1    | -0.126286014 | 3.04923668 | -1.664148517 | 0.097305 | 0.12442 | -5.96557103 |
| C1orf21 | -0.156555645 | 3.00796221 | -1.663882789 | 0.097358 | 0.12448 | -5.96600836 |
| MGAT4C  | 0.205936878  | 2.86755912 | 1.663683525  | 0.097398 | 0.12451 | -5.96633626 |
| ANKFN1  | -0.04349238  | 0.05200041 | -1.663676775 | 0.0974   | 0.12451 | -5.96634737 |
| HRH2    | 0.090609076  | 0.42851324 | 1.663605362  | 0.097414 | 0.12452 | -5.96646488 |
| CTF1    | 0.223402117  | 4.86394682 | 1.663392458  | 0.097457 | 0.12456 | -5.96681516 |
| NXPE3   | -0.135286285 | 2.7698749  | -1.663263054 | 0.097482 | 0.12459 | -5.96702805 |
| UBE2L5  | -0.068709127 | 0.61459556 | -1.663179099 | 0.097499 | 0.1246  | -5.96716616 |
| HIP1R   | -0.111271596 | 4.75571781 | -1.662560225 | 0.097623 | 0.12475 | -5.96818401 |
| ADAMTS  | -0.091467952 | 0.41472922 | -1.66249283  | 0.097637 | 0.12476 | -5.96829483 |
| CEP295  | 0.021950748  | 0.07517508 | 1.661038145  | 0.097929 | 0.12512 | -5.97068576 |
| A4GNT   | -0.025442474 | 0.10703601 | -1.660776422 | 0.097982 | 0.12518 | -5.97111571 |
| ZNF486  | 0.288619391  | 5.55504092 | 1.660360806  | 0.098065 | 0.12528 | -5.97179834 |
| ZNF532  | 0.145528689  | 4.28369875 | 1.659864489  | 0.098165 | 0.12539 | -5.9726133  |
| OR13C5  | -0.025645829 | 0.09561037 | -1.658694315 | 0.098401 | 0.12569 | -5.97453379 |



|          |              |            |              |          |         |             |
|----------|--------------|------------|--------------|----------|---------|-------------|
| NMD3     | -0.111873647 | 4.6091628  | -1.658641077 | 0.098412 | 0.12569 | -5.97462114 |
| KDM5B    | 0.142750448  | 4.03287954 | 1.658384488  | 0.098464 | 0.12575 | -5.97504206 |
| TMF1     | -0.149038394 | 4.64485235 | -1.658197863 | 0.098501 | 0.12579 | -5.97534817 |
| MSS51    | 0.103424548  | 1.26944531 | 1.657987864  | 0.098544 | 0.12583 | -5.97569258 |
| ATP11A   | 0.26890467   | 5.20177571 | 1.65793794   | 0.098554 | 0.12583 | -5.97577445 |
| SCRN1    | 0.181943116  | 4.90955467 | 1.657910501  | 0.098559 | 0.12583 | -5.97581945 |
| C10orf95 | 0.18953476   | 2.99210096 | 1.657875858  | 0.098566 | 0.12583 | -5.97587626 |
| MAP3K1   | -0.098811381 | 4.79541568 | -1.657657084 | 0.098611 | 0.12588 | -5.97623499 |
| IPO5     | -0.135656663 | 5.4642485  | -1.657474819 | 0.098647 | 0.12591 | -5.97653382 |
| NAALAD   | -0.119979002 | 1.47666403 | -1.657384874 | 0.098666 | 0.12593 | -5.97668128 |
| CDCA7    | -0.136494049 | 1.23320351 | -1.656729137 | 0.098798 | 0.12609 | -5.97775607 |
| COL20A1  | -0.01223548  | 0.02761691 | -1.656399179 | 0.098865 | 0.12616 | -5.97829673 |
| EFCAB1   | 0.063638294  | 0.64863305 | 1.655932416  | 0.09896  | 0.12628 | -5.97906138 |
| PCSK1N   | 0.480038515  | 4.12106303 | 1.655529888  | 0.099041 | 0.12636 | -5.97972062 |
| TTLL3    | 0.163314985  | 2.64003895 | 1.655527996  | 0.099042 | 0.12636 | -5.97972372 |
| RAP2A    | 0.139346275  | 4.24659736 | 1.65535945   | 0.099076 | 0.1264  | -5.97999971 |
| PKD1     | -0.105081112 | 2.86251004 | -1.654908063 | 0.099168 | 0.1265  | -5.98073872 |
| RAD54L   | -0.088427521 | 1.16734032 | -1.654811554 | 0.099187 | 0.12652 | -5.9808967  |
| HOXC10   | 0.114163082  | 0.15871794 | 1.654649252  | 0.09922  | 0.12655 | -5.98116235 |
| EPOR     | -0.229830756 | 5.62907153 | -1.654520361 | 0.099246 | 0.12657 | -5.98137331 |
| ESRP2    | -0.145388032 | 4.41536925 | -1.654110162 | 0.09933  | 0.12667 | -5.98204455 |
| CAPZA1   | -0.111024917 | 6.38302655 | -1.653731086 | 0.099407 | 0.12676 | -5.98266473 |
| FOXH1    | -0.031064267 | 0.12783326 | -1.653457027 | 0.099463 | 0.12682 | -5.98311301 |
| NR1I2    | -0.039796515 | 0.31492862 | -1.653388497 | 0.099476 | 0.12683 | -5.98322509 |
| BTBD10   | -0.118802388 | 4.42787759 | -1.652172935 | 0.099724 | 0.12714 | -5.98521243 |
| CREBBP   | -0.132308356 | 4.48968496 | -1.652115874 | 0.099736 | 0.12714 | -5.98530568 |
| CA6      | 0.024108083  | 0.06343847 | 1.651801565  | 0.0998   | 0.12721 | -5.9858193  |
| PDE6A    | 0.020114797  | 0.07210986 | 1.651367709  | 0.099889 | 0.12732 | -5.98652811 |
| TAS2R1C  | -0.056689936 | 0.34999108 | -1.651149998 | 0.099933 | 0.12736 | -5.98688373 |
| ACSBG2   | 0.019141926  | 0.10516811 | 1.649981255  | 0.100172 | 0.12766 | -5.98879201 |
| TSKU     | -0.198314233 | 5.40261667 | -1.649908939 | 0.100187 | 0.12767 | -5.98891005 |
| CARD6    | -0.122246073 | 3.45704943 | -1.649861517 | 0.100197 | 0.12767 | -5.98898745 |
| CENPK    | 0.106263251  | 1.26234124 | 1.649647303  | 0.10024  | 0.12772 | -5.98933704 |
| ATP6V1E  | -0.056399762 | 0.31120811 | -1.649308656 | 0.10031  | 0.1278  | -5.98988961 |
| NRBP2    | 0.157083565  | 4.473735   | 1.648806623  | 0.100413 | 0.12792 | -5.99070858 |
| PPP4R1   | -0.129598388 | 4.85848254 | -1.648650825 | 0.100445 | 0.12795 | -5.99096269 |
| HOXA5    | -0.082441647 | 0.61691006 | -1.648315978 | 0.100513 | 0.12803 | -5.99150874 |
| CYB5RL   | -0.078954452 | 1.07675809 | -1.648127398 | 0.100552 | 0.12807 | -5.99181622 |
| ADAM28   | 0.175326906  | 1.2501387  | 1.646888412  | 0.100807 | 0.12838 | -5.99383553 |
| ATP6V0A  | -0.070145911 | 0.11944507 | -1.646844289 | 0.100816 | 0.12838 | -5.99390741 |

|         |              |            |              |          |         |             |
|---------|--------------|------------|--------------|----------|---------|-------------|
| RAB8A   | -0.078021171 | 4.11618532 | -1.645592279 | 0.101074 | 0.1287  | -5.99594638 |
| FBXO2   | 0.23624606   | 5.0452645  | 1.645578443  | 0.101077 | 0.1287  | -5.9959689  |
| SRRM3   | -0.145958879 | 1.6948981  | -1.645391357 | 0.101115 | 0.12874 | -5.99627345 |
| GDPD3   | -0.127695528 | 1.80099266 | -1.645201486 | 0.101154 | 0.12878 | -5.9965825  |
| EEF1G   | -0.101366195 | 0.81774517 | -1.644956398 | 0.101205 | 0.12883 | -5.99698137 |
| ATP1A2  | -0.152815352 | 1.08658027 | -1.644733014 | 0.101251 | 0.12888 | -5.99734486 |
| PCDH20  | 0.021242613  | 0.0524623  | 1.644660482  | 0.101266 | 0.12889 | -5.99746288 |
| STXBP5  | -0.125392661 | 2.80281716 | -1.644163266 | 0.101369 | 0.12901 | -5.99827175 |
| KIF2C   | -0.127797791 | 1.8682361  | -1.643736497 | 0.101457 | 0.12911 | -5.99896584 |
| LCORL   | -0.091283351 | 1.9547358  | -1.643499552 | 0.101506 | 0.12917 | -5.99935112 |
| EPHA1   | -0.15417456  | 3.28815526 | -1.643060541 | 0.101597 | 0.12927 | -6.00006482 |
| CAVIN3  | -0.177636375 | 3.94303715 | -1.641194008 | 0.101984 | 0.12975 | -6.00309718 |
| GABRE   | 0.206140453  | 1.93338428 | 1.641190323  | 0.101985 | 0.12975 | -6.00310316 |
| TMX3    | -0.121199779 | 4.23115156 | -1.640781674 | 0.10207  | 0.12984 | -6.0037666  |
| TRAF1   | 0.14683661   | 3.08430564 | 1.640681398  | 0.102091 | 0.12986 | -6.00392937 |
| SNCAIP  | 0.121474731  | 0.66759449 | 1.640456412  | 0.102137 | 0.12991 | -6.00429454 |
| ZNF99   | -0.032105032 | 0.16964619 | -1.638628533 | 0.102518 | 0.13038 | -6.00725953 |
| ZNF106  | -0.149670888 | 4.17422913 | -1.638026371 | 0.102644 | 0.13053 | -6.00823559 |
| DPY19L4 | -0.140944736 | 4.27225568 | -1.637354317 | 0.102784 | 0.1307  | -6.00932451 |
| SMAD3   | -0.160105523 | 5.12369574 | -1.637092513 | 0.102839 | 0.13076 | -6.00974859 |
| GATD3A  | -0.200023957 | 1.05662632 | -1.63675406  | 0.10291  | 0.13084 | -6.01029674 |
| CGN     | 0.200485479  | 3.98969072 | 1.636241074  | 0.103017 | 0.13097 | -6.01112733 |
| ASIC4   | 0.013487123  | 0.02366952 | 1.636197627  | 0.103026 | 0.13097 | -6.01119767 |
| CCDC19  | 0.029743473  | 0.09677311 | 1.635164516  | 0.103242 | 0.13124 | -6.0128696  |
| USP35   | -0.118282802 | 3.12437181 | -1.634721388 | 0.103335 | 0.13135 | -6.01358642 |
| PROCR   | -0.159523188 | 4.49321972 | -1.634364258 | 0.10341  | 0.13143 | -6.01416399 |
| LMCD1   | 0.138447688  | 2.12480944 | 1.634088078  | 0.103468 | 0.13149 | -6.01461056 |
| CMTM8   | -0.149144569 | 5.43489264 | -1.633955028 | 0.103496 | 0.13152 | -6.01482566 |
| CATSPE  | -0.018971769 | 0.03950199 | -1.633871972 | 0.103514 | 0.13153 | -6.01495994 |
| CPLANE  | 0.15308443   | 2.90834441 | 1.633723337  | 0.103545 | 0.13156 | -6.01520021 |
| HBG2    | -0.040210333 | 0.1765865  | -1.6331616   | 0.103663 | 0.1317  | -6.01610808 |
| FBXO11  | -0.173649885 | 3.59417438 | -1.632105029 | 0.103886 | 0.13198 | -6.01781486 |
| CACNA1  | -0.081196655 | 0.42829391 | -1.631782556 | 0.103954 | 0.13205 | -6.01833556 |
| BEND4   | 0.023305248  | 0.04552316 | 1.631702481  | 0.103971 | 0.13206 | -6.01846485 |
| DSG3    | 0.040429105  | 0.06828255 | 1.631176686  | 0.104082 | 0.13219 | -6.01931361 |
| PIP5K1A | -0.13913272  | 4.85825565 | -1.630840604 | 0.104153 | 0.13227 | -6.01985598 |
| TTK     | -0.083267491 | 0.93647093 | -1.630657369 | 0.104191 | 0.13231 | -6.02015165 |
| TUFT1   | -0.126167113 | 3.62951554 | -1.630343278 | 0.104258 | 0.13239 | -6.02065838 |
| CLK4    | -0.128834731 | 3.45548269 | -1.630288343 | 0.104269 | 0.13239 | -6.020747   |
| EIF4EBP | -0.118515027 | 5.90500967 | -1.630224406 | 0.104283 | 0.1324  | -6.02085013 |

|         |              |            |              |          |         |             |
|---------|--------------|------------|--------------|----------|---------|-------------|
| PRSS53  | 0.055603277  | 0.46984898 | 1.629780791  | 0.104377 | 0.13251 | -6.02156562 |
| STK4    | 0.099434624  | 3.55208984 | 1.629272476  | 0.104484 | 0.13264 | -6.02238522 |
| ADGRA2  | -0.179902274 | 3.1779539  | -1.628525254 | 0.104642 | 0.13282 | -6.02358957 |
| TBX19   | -0.090601551 | 1.56135959 | -1.628523592 | 0.104643 | 0.13282 | -6.02359225 |
| SIX1    | -0.108620383 | 0.83640603 | -1.62773578  | 0.10481  | 0.13302 | -6.02486144 |
| ZNF670  | -0.013513139 | 0.06538328 | -1.626935682 | 0.10498  | 0.13323 | -6.02614981 |
| NTN4    | 0.169695055  | 3.30021924 | 1.626524971  | 0.105067 | 0.13333 | -6.02681092 |
| NCAPG   | 0.102855761  | 0.8601369  | 1.626119341  | 0.105154 | 0.13343 | -6.0274637  |
| IFFO1   | -0.132656097 | 2.21839121 | -1.625541649 | 0.105277 | 0.13357 | -6.02839309 |
| CEBPD   | -0.240394795 | 6.53446593 | -1.625167412 | 0.105356 | 0.13366 | -6.02899499 |
| DDR2    | -0.191774162 | 2.47795172 | -1.624809142 | 0.105433 | 0.13375 | -6.02957108 |
| DDX17   | -0.148941913 | 7.23649953 | -1.624302953 | 0.105541 | 0.13388 | -6.03038482 |
| CLDN8   | -0.268542686 | 4.25682476 | -1.624160165 | 0.105571 | 0.1339  | -6.03061432 |
| ADCY6   | -0.131654552 | 4.07130439 | -1.624142163 | 0.105575 | 0.1339  | -6.03064325 |
| CCNI2   | 0.093416108  | 1.07509191 | 1.624040262  | 0.105597 | 0.13392 | -6.03080701 |
| CHPT1   | -0.172729833 | 5.75990788 | -1.622836012 | 0.105854 | 0.13423 | -6.03274162 |
| WFDC13  | -0.026910294 | 0.07676105 | -1.622500455 | 0.105926 | 0.13432 | -6.03328044 |
| NFYA    | -0.130771524 | 4.82950245 | -1.621825595 | 0.106071 | 0.13449 | -6.03436376 |
| PAPPA2  | -0.056914867 | 0.25358777 | -1.621088242 | 0.106229 | 0.13468 | -6.03554689 |
| SLC39A8 | -0.146034706 | 3.73761007 | -1.62096491  | 0.106255 | 0.1347  | -6.03574473 |
| LMF1    | -0.112581279 | 3.21701818 | -1.620768329 | 0.106297 | 0.13475 | -6.03606005 |
| ACAD11  | -0.050346096 | 0.51001002 | -1.620657444 | 0.106321 | 0.13477 | -6.03623789 |
| DOCK6   | -0.116249745 | 4.35915766 | -1.620346676 | 0.106388 | 0.13484 | -6.03673625 |
| CASP1   | 0.156363789  | 2.68691853 | 1.61950305   | 0.106569 | 0.13506 | -6.03808865 |
| SLC6A11 | -0.031583304 | 0.05407177 | -1.619257642 | 0.106622 | 0.13512 | -6.03848193 |
| TXLNG   | -0.118715684 | 4.23321554 | -1.61914922  | 0.106645 | 0.13513 | -6.03865566 |
| NHLH2   | 0.016706062  | 0.02777379 | 1.619107793  | 0.106654 | 0.13513 | -6.03872204 |
| ARL8B   | -0.109432713 | 6.7233041  | -1.619084213 | 0.106659 | 0.13513 | -6.03875982 |
| PTGS1   | 0.149056231  | 2.25399682 | 1.618311813  | 0.106826 | 0.13534 | -6.03999712 |
| PRG4    | 0.118536807  | 0.42484347 | 1.617201964  | 0.107065 | 0.13563 | -6.04177397 |
| PCM1    | -0.12324371  | 5.10852406 | -1.615832226 | 0.107361 | 0.13599 | -6.04396524 |
| RAB40A  | -0.019015824 | 0.07926288 | -1.615246485 | 0.107488 | 0.13614 | -6.04490174 |
| HIST1H1 | -0.046282593 | 0.1881886  | -1.61515889  | 0.107507 | 0.13616 | -6.04504176 |
| SLC46A2 | 0.024235262  | 0.11350632 | 1.614072061  | 0.107743 | 0.13645 | -6.04677844 |
| NLGN4X  | 0.077348407  | 0.57023843 | 1.613434833  | 0.107881 | 0.13661 | -6.04779615 |
| SLC29A3 | -0.114937462 | 3.64892303 | -1.61265933  | 0.10805  | 0.13681 | -6.04903418 |
| DYNC1I2 | -0.129241492 | 5.64742548 | -1.610939229 | 0.108424 | 0.13728 | -6.05177808 |
| DACH1   | -0.053152341 | 0.34027029 | -1.610636664 | 0.10849  | 0.13735 | -6.05226044 |
| AMER1   | -0.103087065 | 1.68977333 | -1.609029024 | 0.108841 | 0.13779 | -6.05482188 |
| EGFR    | 0.209838842  | 4.63389265 | 1.608789208  | 0.108894 | 0.13784 | -6.05520376 |

|          |              |            |              |          |         |             |
|----------|--------------|------------|--------------|----------|---------|-------------|
| ZNF331   | -0.144587434 | 3.61971568 | -1.608651499 | 0.108924 | 0.13787 | -6.05542303 |
| CMTM7    | 0.141809518  | 4.35263901 | 1.603940059  | 0.109959 | 0.13917 | -6.06291357 |
| MMS19    | -0.096212265 | 5.01023266 | -1.603818911 | 0.109986 | 0.13919 | -6.0631059  |
| ANKRD6   | -0.073123524 | 0.72169401 | -1.603790674 | 0.109992 | 0.13919 | -6.06315072 |
| BHLHA11  | -0.204870907 | 1.04459231 | -1.603594916 | 0.110035 | 0.13924 | -6.06346146 |
| EPS8     | 0.219412394  | 5.68364597 | 1.603503874  | 0.110055 | 0.13925 | -6.06360596 |
| ANKRD2   | -0.098041396 | 2.0139753  | -1.60296966  | 0.110173 | 0.13939 | -6.0644537  |
| ROCK1    | 0.148680727  | 3.84099645 | 1.602887744  | 0.110191 | 0.1394  | -6.06458367 |
| PCDH19   | -0.043458577 | 0.2402052  | -1.601711129 | 0.110452 | 0.13972 | -6.06644976 |
| PTPRG    | -0.179181406 | 4.41286809 | -1.60135949  | 0.110529 | 0.13981 | -6.0670072  |
| C1orf159 | -0.096222678 | 2.23607887 | -1.601305259 | 0.110541 | 0.13981 | -6.06709316 |
| CLDN18   | -0.024243544 | 0.11594023 | -1.601113398 | 0.110584 | 0.13986 | -6.06739724 |
| ZNF354E  | -0.109666353 | 2.73344627 | -1.600007917 | 0.110829 | 0.14015 | -6.06914866 |
| TSPAN3   | 0.100811657  | 1.12353534 | 1.599962673  | 0.110839 | 0.14015 | -6.06922031 |
| RIPPLY3  | -0.098508523 | 0.91911942 | -1.59994459  | 0.110843 | 0.14015 | -6.06924895 |
| TNNT1    | 0.254292098  | 0.55497441 | 1.599625727  | 0.110914 | 0.14023 | -6.06975389 |
| TK1      | 0.168274503  | 3.98207801 | 1.598822436  | 0.111092 | 0.14045 | -6.0710255  |
| BROX     | -0.108969064 | 4.94910287 | -1.598730877 | 0.111113 | 0.14046 | -6.0711704  |
| PRRT3    | -0.138875306 | 3.47829409 | -1.598495227 | 0.111165 | 0.14052 | -6.07154329 |
| KDM3A    | -0.117601127 | 3.75325629 | -1.597866069 | 0.111305 | 0.14068 | -6.07253861 |
| ABCG4    | 0.102282259  | 1.05182348 | 1.596169946  | 0.111683 | 0.14115 | -6.07521995 |
| PITX2    | 0.024445694  | 0.03688381 | 1.593627149  | 0.112252 | 0.14186 | -6.07923454 |
| TUBB2B   | -0.151010956 | 0.73251663 | -1.593422414 | 0.112298 | 0.1419  | -6.0795575  |
| HIGD1C   | -0.059107963 | 0.37599005 | -1.593401501 | 0.112303 | 0.1419  | -6.07959049 |
| POLR1E   | -0.109518724 | 4.65838059 | -1.592038916 | 0.112609 | 0.14228 | -6.08173886 |
| TOP3A    | -0.084447209 | 3.15710524 | -1.591753762 | 0.112673 | 0.14235 | -6.08218824 |
| N4BP2L2  | -0.109174588 | 3.99251618 | -1.590880771 | 0.112869 | 0.14258 | -6.08356349 |
| TICAM1   | 0.101660672  | 4.69102929 | 1.590879639  | 0.11287  | 0.14258 | -6.08356527 |
| UHRF2    | -0.105618909 | 3.25959545 | -1.590713369 | 0.112907 | 0.14261 | -6.08382712 |
| PPIAL4A  | -0.029966806 | 0.14953104 | -1.590241328 | 0.113013 | 0.14274 | -6.08457035 |
| BHMG1    | -0.01127216  | 0.03178768 | -1.589744259 | 0.113126 | 0.14287 | -6.08535276 |
| GCNT1    | 0.184250678  | 4.72947907 | 1.589332767  | 0.113218 | 0.14298 | -6.08600029 |
| A4GALT   | -0.159470488 | 3.93383512 | -1.588962645 | 0.113302 | 0.14307 | -6.08658257 |
| EVA1C    | 0.130313388  | 3.886337   | 1.588458908  | 0.113416 | 0.1432  | -6.08737485 |
| KRT86    | -0.124225092 | 2.680234   | -1.587408043 | 0.113654 | 0.14349 | -6.08902686 |
| ABCB9    | -0.080065786 | 1.50086598 | -1.587261295 | 0.113687 | 0.14352 | -6.08925747 |
| PCDHA4   | 0.046678192  | 0.15561642 | 1.586955519  | 0.113756 | 0.1436  | -6.08973792 |
| TWF2     | -0.120243454 | 6.0727866  | -1.586831513 | 0.113784 | 0.14363 | -6.08993274 |
| MPP3     | -0.121010694 | 1.80989675 | -1.585842272 | 0.114008 | 0.1439  | -6.09148634 |
| EMB      | 0.200185948  | 5.84922731 | 1.585490564  | 0.114088 | 0.14399 | -6.09203846 |

|         |              |            |              |          |         |             |
|---------|--------------|------------|--------------|----------|---------|-------------|
| DCST1   | 0.054102867  | 0.43138378 | 1.584839557  | 0.114236 | 0.14416 | -6.09306013 |
| NUP98   | -0.127463253 | 5.02996651 | -1.584824294 | 0.11424  | 0.14416 | -6.09308408 |
| IL27    | 0.038792579  | 0.19753044 | 1.583892148  | 0.114452 | 0.14441 | -6.09454622 |
| EFHD2   | -0.191930948 | 7.93207117 | -1.583870901 | 0.114457 | 0.14441 | -6.09457954 |
| INO80D  | -0.108539942 | 2.80980843 | -1.583593206 | 0.11452  | 0.14448 | -6.09501495 |
| SCRG1   | 0.044036478  | 0.17210069 | 1.58349877   | 0.114541 | 0.14449 | -6.09516301 |
| SZT2    | -0.104038003 | 3.32245777 | -1.583473312 | 0.114547 | 0.14449 | -6.09520292 |
| SLC9A4  | -0.025924857 | 0.06280543 | -1.582632341 | 0.114739 | 0.14472 | -6.09652098 |
| EXD3    | -0.119814302 | 3.14306755 | -1.579508916 | 0.115453 | 0.14561 | -6.10141034 |
| NUB1    | -0.09489077  | 5.74183933 | -1.579287712 | 0.115504 | 0.14567 | -6.10175625 |
| PROCA1  | 0.08171099   | 0.89060525 | 1.57832793   | 0.115724 | 0.14593 | -6.10325657 |
| ENTPD8  | 0.199220059  | 1.82279778 | 1.577689796  | 0.115871 | 0.14611 | -6.1042536  |
| CSMD3   | -0.018527096 | 0.02064896 | -1.577331768 | 0.115953 | 0.1462  | -6.10481282 |
| EFCAB1  | -0.207012907 | 2.76564762 | -1.577135087 | 0.115998 | 0.14625 | -6.10511997 |
| GTPBP2  | -0.110449898 | 5.09038725 | -1.576661893 | 0.116107 | 0.14637 | -6.10585878 |
| CELA2A  | -0.016692862 | 0.06051119 | -1.576086443 | 0.11624  | 0.14653 | -6.10675696 |
| TNFSF10 | -0.159865488 | 4.14357484 | -1.576007293 | 0.116258 | 0.14653 | -6.10688047 |
| ZMYM5   | -0.12125871  | 3.90895973 | -1.575992158 | 0.116261 | 0.14653 | -6.10690409 |
| DNAJB1  | -0.146134651 | 6.30572547 | -1.575299334 | 0.116421 | 0.14672 | -6.10798497 |
| HVCN1   | -0.11575024  | 2.20035004 | -1.575172927 | 0.11645  | 0.14674 | -6.10818213 |
| TMEM82  | -0.046309342 | 0.08163954 | -1.575165425 | 0.116452 | 0.14674 | -6.10819383 |
| ZFAT    | -0.111792652 | 2.31365553 | -1.574046946 | 0.116711 | 0.14706 | -6.10993766 |
| PARP10  | -0.111617486 | 4.97426893 | -1.573547546 | 0.116826 | 0.14719 | -6.11071589 |
| CATSPE  | 0.098937798  | 1.48226725 | 1.572633816  | 0.117038 | 0.14745 | -6.11213915 |
| TRIM56  | -0.110102779 | 4.84698106 | -1.572536224 | 0.11706  | 0.14746 | -6.11229111 |
| DAB2    | -0.136011357 | 3.67205367 | -1.57198706  | 0.117188 | 0.14761 | -6.11314607 |
| KCNG1   | -0.069965365 | 0.20162685 | -1.571601857 | 0.117277 | 0.14772 | -6.11374559 |
| ATP7A   | -0.124024581 | 2.90710106 | -1.57080707  | 0.117462 | 0.14794 | -6.11498212 |
| SGPL1   | 0.128158996  | 5.37067463 | 1.570584318  | 0.117513 | 0.14799 | -6.11532857 |
| ZNF319  | -0.139972858 | 4.88226684 | -1.569731145 | 0.117712 | 0.14823 | -6.11665508 |
| RNF224  | 0.158812363  | 1.84788721 | 1.569640828  | 0.117733 | 0.14825 | -6.11679546 |
| UPK1A   | -0.046725239 | 0.1011321  | -1.569377281 | 0.117794 | 0.14831 | -6.11720505 |
| TEPP    | 0.265346102  | 2.84929039 | 1.569333077  | 0.117804 | 0.14831 | -6.11727374 |
| SLC8B1  | 0.094420171  | 3.58720842 | 1.568223268  | 0.118063 | 0.14863 | -6.11899778 |
| AKR1B1C | -0.193867039 | 0.3159323  | -1.567996147 | 0.118116 | 0.14868 | -6.11935045 |
| UAP1    | -0.132043196 | 4.97132304 | -1.567796622 | 0.118163 | 0.14873 | -6.11966023 |
| U2AF1L5 | -0.037208552 | 0.18513229 | -1.567026358 | 0.118343 | 0.14895 | -6.12085577 |
| PTPN3   | -0.119327051 | 3.70300841 | -1.566065774 | 0.118567 | 0.14921 | -6.12234591 |
| HCN2    | -0.154790458 | 0.58347934 | -1.566043457 | 0.118573 | 0.14921 | -6.12238051 |
| PACSIN3 | -0.145063732 | 5.35007405 | -1.56579036  | 0.118632 | 0.14928 | -6.12277298 |

|           |              |            |              |          |         |             |
|-----------|--------------|------------|--------------|----------|---------|-------------|
| DSC1      | 0.011677586  | 0.02617293 | 1.565376616  | 0.118729 | 0.14939 | -6.12341443 |
| FUT6      | 0.033786733  | 0.05030839 | 1.563867462  | 0.119083 | 0.14982 | -6.12575273 |
| IMPDH2    | -0.113488621 | 7.35452022 | -1.563812635 | 0.119096 | 0.14983 | -6.12583764 |
| SYNRG     | -0.109155975 | 3.67560606 | -1.563329669 | 0.119209 | 0.14996 | -6.12658546 |
| WDR75     | -0.086786653 | 4.103601   | -1.563060757 | 0.119273 | 0.15003 | -6.12700174 |
| GPR78     | 0.023581986  | 0.09984419 | 1.562616034  | 0.119377 | 0.15015 | -6.12769003 |
| RRP9      | -0.094698079 | 5.45538128 | -1.56172849  | 0.119586 | 0.1504  | -6.12906308 |
| TNFRSF10A | 0.120539844  | 0.95435843 | 1.561586523  | 0.11962  | 0.15043 | -6.12928264 |
| ZDHHC2    | -0.158998349 | 5.54171797 | -1.560576435 | 0.119858 | 0.15072 | -6.13084421 |
| ZBTB42    | -0.138154597 | 4.59759281 | -1.560384212 | 0.119903 | 0.15077 | -6.13114127 |
| DTHD1     | 0.049611372  | 0.15743991 | 1.560246647  | 0.119936 | 0.1508  | -6.13135384 |
| MINK1     | -0.115076341 | 4.91592859 | -1.559890652 | 0.12002  | 0.15089 | -6.13190384 |
| PROX2     | -0.044008298 | 0.33093022 | -1.557605719 | 0.120561 | 0.15156 | -6.1354311  |
| KRBA2     | -0.075393711 | 0.73515122 | -1.557494691 | 0.120587 | 0.15158 | -6.13560237 |
| INSM1     | 0.027725261  | 0.07689387 | 1.55611669   | 0.120915 | 0.15197 | -6.13772699 |
| ANKRD1    | -0.132319887 | 4.4403405  | -1.556084254 | 0.120922 | 0.15197 | -6.13777698 |
| ABLIM1    | 0.168454397  | 5.96045988 | 1.556068706  | 0.120926 | 0.15197 | -6.13780094 |
| FOXG1     | 0.036233929  | 0.09631862 | 1.555729584  | 0.121007 | 0.15206 | -6.13832351 |
| C12orf42  | 0.017264025  | 0.03733911 | 1.553658648  | 0.1215   | 0.15266 | -6.14151226 |
| GMNC      | -0.056406203 | 0.09910607 | -1.553657439 | 0.1215   | 0.15266 | -6.14151412 |
| C8B       | -0.075655024 | 0.21264055 | -1.553579332 | 0.121519 | 0.15267 | -6.1416343  |
| GDF3      | 0.056949703  | 0.42742675 | 1.55344433   | 0.121551 | 0.1527  | -6.14184202 |
| PLAC8     | 0.148289457  | 1.32045896 | 1.552982763  | 0.121662 | 0.15283 | -6.14255206 |
| CABYR     | 0.116142301  | 0.67870174 | 1.552070331  | 0.12188  | 0.15309 | -6.14395507 |
| AGTPBP1   | -0.103585638 | 3.10679806 | -1.551676828 | 0.121974 | 0.1532  | -6.14455989 |
| HMG20A    | -0.151713381 | 3.35720581 | -1.551533105 | 0.122008 | 0.15323 | -6.14478076 |
| ARPC1B    | -0.113094997 | 6.63334409 | -1.55146548  | 0.122024 | 0.15324 | -6.14488468 |
| CHRNA3    | -0.032120841 | 0.12806502 | -1.551172661 | 0.122095 | 0.15331 | -6.14533459 |
| FAM169A   | -0.180349711 | 1.91296816 | -1.551140317 | 0.122102 | 0.15331 | -6.14538428 |
| TVP23A    | -0.061394663 | 0.62400281 | -1.550072393 | 0.122358 | 0.15363 | -6.14702439 |
| RRM1      | -0.127790182 | 5.00109279 | -1.547716024 | 0.122925 | 0.15432 | -6.15063936 |
| APOL3     | -0.166383686 | 3.35415873 | -1.547633899 | 0.122945 | 0.15434 | -6.15076525 |
| TOP1      | -0.140490946 | 6.46357295 | -1.547560072 | 0.122962 | 0.15435 | -6.15087842 |
| UAP1L1    | -0.118460266 | 3.48647153 | -1.547506191 | 0.122975 | 0.15435 | -6.15096101 |
| ROS1      | 0.044537473  | 0.07283448 | 1.547385469  | 0.123005 | 0.15438 | -6.15114604 |
| KAT6B     | -0.134127578 | 3.67627481 | -1.547330764 | 0.123018 | 0.15438 | -6.15122988 |
| MAU2      | -0.107016787 | 4.05192364 | -1.547120215 | 0.123068 | 0.15444 | -6.15155255 |
| EPB41L3   | -0.158623421 | 2.12818898 | -1.546833979 | 0.123138 | 0.15451 | -6.15199114 |
| C11orf21  | 0.101491546  | 0.77927696 | 1.546805285  | 0.123144 | 0.15451 | -6.1520351  |
| RAET1G    | 0.169169199  | 2.12330824 | 1.546490028  | 0.12322  | 0.15459 | -6.15251806 |

|         |              |            |              |          |         |             |
|---------|--------------|------------|--------------|----------|---------|-------------|
| MX1     | 0.167532194  | 4.73880036 | 1.545785534  | 0.123391 | 0.15479 | -6.15359695 |
| FILIP1L | -0.177670076 | 3.27168635 | -1.545685587 | 0.123415 | 0.15481 | -6.15374998 |
| HSPB2-C | -0.012816567 | 0.04804092 | -1.545226957 | 0.123526 | 0.15494 | -6.15445204 |
| PIGL    | -0.110285741 | 2.74993199 | -1.544462988 | 0.12371  | 0.15516 | -6.15562106 |
| FGF10   | 0.069333291  | 0.16665077 | 1.544137018  | 0.123789 | 0.15525 | -6.15611968 |
| CHL1    | 0.177252853  | 0.6009806  | 1.544018971  | 0.123818 | 0.15527 | -6.15630023 |
| PCDHGE  | -0.146290767 | 1.5693198  | -1.542919355 | 0.124084 | 0.1556  | -6.15798138 |
| ADAMTS  | 0.183541491  | 2.40408277 | 1.542681262  | 0.124142 | 0.15565 | -6.15834524 |
| HYAL2   | -0.12043684  | 5.99936744 | -1.542677243 | 0.124143 | 0.15565 | -6.15835138 |
| ANKRD5  | 0.050702577  | 0.26910587 | 1.540820573  | 0.124595 | 0.1562  | -6.16118685 |
| HERC4   | -0.089045811 | 2.96184035 | -1.539529252 | 0.124909 | 0.15658 | -6.16315695 |
| ACVR1   | 0.17112938   | 6.24900235 | 1.539315413  | 0.124961 | 0.15664 | -6.16348304 |
| TDRD1   | -0.040093957 | 0.06530313 | -1.539264529 | 0.124974 | 0.15664 | -6.16356063 |
| TMC2    | -0.01780989  | 0.08442478 | -1.538559802 | 0.125146 | 0.15685 | -6.16463493 |
| JPT1    | 0.111189811  | 4.54990121 | 1.538056577  | 0.125269 | 0.15699 | -6.16540176 |
| ABI1    | -0.108770382 | 5.30782726 | -1.537901858 | 0.125307 | 0.15702 | -6.16563748 |
| LAMB1   | -0.19245722  | 6.34537148 | -1.537543831 | 0.125394 | 0.15712 | -6.16618285 |
| PLAAT5  | 0.058025806  | 0.34444182 | 1.536278091  | 0.125704 | 0.1575  | -6.16810991 |
| SPNS3   | 0.078176125  | 0.67697972 | 1.535602369  | 0.12587  | 0.1577  | -6.16913804 |
| CASQ1   | 0.081882928  | 0.32751604 | 1.534564713  | 0.126125 | 0.158   | -6.17071601 |
| PCDHA1  | -0.15937161  | 1.29808122 | -1.534185118 | 0.126218 | 0.15811 | -6.17129299 |
| SYNJ2   | 0.114217971  | 3.2946665  | 1.533281643  | 0.12644  | 0.15837 | -6.17266572 |
| GATA1   | 0.029905757  | 0.18876678 | 1.532932026  | 0.126526 | 0.15847 | -6.17319671 |
| TNKS2   | -0.137164037 | 5.38654086 | -1.532444558 | 0.126647 | 0.15861 | -6.17393687 |
| SLX1B   | 0.013543574  | 0.04512306 | 1.531948812  | 0.126769 | 0.15875 | -6.17468936 |
| SMC6    | -0.098307844 | 2.80458558 | -1.531761785 | 0.126815 | 0.1588  | -6.17497318 |
| CHEK2   | 0.096457638  | 2.64295978 | 1.53132243   | 0.126923 | 0.15892 | -6.1756398  |
| CCNA2   | 0.123716751  | 1.72625516 | 1.53112172   | 0.126973 | 0.15897 | -6.17594426 |
| LDHAL6/ | -0.068912991 | 0.2277326  | -1.531103959 | 0.126977 | 0.15897 | -6.1759712  |
| GLYATL' | -0.0411111   | 0.09299655 | -1.531044836 | 0.126992 | 0.15897 | -6.17606088 |
| PTGFRN  | 0.133138333  | 4.58760319 | 1.530771634  | 0.12706  | 0.15904 | -6.17647523 |
| NIPIB3  | 0.068857423  | 0.59438805 | 1.529245865  | 0.127437 | 0.15951 | -6.17878794 |
| RCSD1   | -0.154917295 | 2.55229438 | -1.528998808 | 0.127498 | 0.15957 | -6.1791622  |
| SPATA1  | -0.045013143 | 0.49859687 | -1.528521463 | 0.127617 | 0.15971 | -6.17988517 |
| DEFB13' | -0.042095334 | 0.11443135 | -1.5284543   | 0.127633 | 0.15972 | -6.17998687 |
| GPRIN3  | 0.115485262  | 1.44533383 | 1.528019282  | 0.127741 | 0.15984 | -6.18064551 |
| GOLGA3  | -0.098466894 | 4.70720227 | -1.526494937 | 0.12812  | 0.1603  | -6.18295197 |
| DMTF1   | -0.13894723  | 4.16054822 | -1.52530429  | 0.128417 | 0.16066 | -6.18475195 |
| TUBB4A  | -0.106246767 | 0.38353386 | -1.524446376 | 0.128631 | 0.16092 | -6.18604806 |
| C2orf91 | 0.015974649  | 0.06050603 | 1.523820075  | 0.128787 | 0.1611  | -6.18699381 |

|          |              |            |              |          |         |             |
|----------|--------------|------------|--------------|----------|---------|-------------|
| COLQ     | -0.111028083 | 1.47812082 | -1.523207816 | 0.12894  | 0.16128 | -6.18791798 |
| ETS1     | -0.164056418 | 5.60416164 | -1.52286054  | 0.129027 | 0.16138 | -6.18844201 |
| RIPK4    | -0.143150172 | 4.31924965 | -1.522212918 | 0.129189 | 0.16157 | -6.18941895 |
| DNAI1    | -0.063831669 | 0.339093   | -1.522037762 | 0.129233 | 0.16161 | -6.1896831  |
| C1QTNF   | -0.010237265 | 0.03583225 | -1.521232959 | 0.129434 | 0.16185 | -6.19089643 |
| KRT6B    | 0.108103675  | 0.21026451 | 1.520746738  | 0.129556 | 0.16199 | -6.19162917 |
| PLA2G12  | -0.301548499 | 2.05941412 | -1.520413364 | 0.12964  | 0.16208 | -6.19213142 |
| OSBPL8   | 0.137210142  | 3.89750693 | 1.520239301  | 0.129684 | 0.16213 | -6.19239362 |
| ABL1     | -0.123188866 | 6.06524858 | -1.519954203 | 0.129756 | 0.1622  | -6.19282302 |
| ERLIN1   | -0.135009036 | 4.95835626 | -1.519859106 | 0.129779 | 0.16222 | -6.19296623 |
| SLC45A2  | -0.08112484  | 0.22421575 | -1.519810277 | 0.129792 | 0.16223 | -6.19303976 |
| TBPL2    | -0.009975146 | 0.03263868 | -1.519756476 | 0.129805 | 0.16223 | -6.19312077 |
| VWA7     | -0.175417011 | 3.04605753 | -1.519336939 | 0.129911 | 0.16235 | -6.19375242 |
| SNX1     | -0.155388957 | 6.99612749 | -1.518230102 | 0.130189 | 0.16269 | -6.19541803 |
| C5orf38  | -0.329822714 | 2.42951486 | -1.517798712 | 0.130298 | 0.1628  | -6.19606689 |
| VRK2     | -0.105359871 | 3.61897665 | -1.517796263 | 0.130299 | 0.1628  | -6.19607057 |
| TCL1A    | 0.185232911  | 0.47827096 | 1.516302865  | 0.130676 | 0.16326 | -6.19831538 |
| ATP9A    | -0.146728446 | 5.63597083 | -1.51498196  | 0.13101  | 0.16366 | -6.2002991  |
| ELK3     | 0.152035264  | 5.64900048 | 1.513947586  | 0.131272 | 0.16398 | -6.20185132 |
| HSPA1B   | -0.168429583 | 6.51738488 | -1.513849992 | 0.131296 | 0.164   | -6.20199772 |
| PLSCR2   | -0.038971533 | 0.39390846 | -1.513615252 | 0.131356 | 0.16406 | -6.20234981 |
| FABP5    | -0.169407792 | 2.73744357 | -1.513285326 | 0.13144  | 0.16415 | -6.20284459 |
| HHIPL1   | -0.080988629 | 0.8589537  | -1.512935128 | 0.131529 | 0.16425 | -6.20336965 |
| WNT3     | 0.162405308  | 2.63042424 | 1.512139353  | 0.131731 | 0.16449 | -6.20456233 |
| NR1D2    | -0.159797937 | 5.56388418 | -1.511838191 | 0.131807 | 0.16457 | -6.20501354 |
| FAM78A   | 0.134264468  | 1.83309974 | 1.51176823   | 0.131825 | 0.16458 | -6.20511834 |
| SPTB     | 0.057300374  | 0.40845652 | 1.511679855  | 0.131848 | 0.1646  | -6.20525073 |
| RLN2     | -0.09547838  | 1.01973013 | -1.511520615 | 0.131888 | 0.16464 | -6.20548924 |
| C1orf146 | -0.048513066 | 0.31835584 | -1.511207616 | 0.131968 | 0.16473 | -6.205958   |
| PLA2G1C  | 0.129469859  | 0.53884451 | 1.511170574  | 0.131977 | 0.16473 | -6.20601347 |
| TTC7A    | -0.110766548 | 4.9777361  | -1.511103844 | 0.131994 | 0.16474 | -6.20611339 |
| FAM135E  | -0.029365966 | 0.03122201 | -1.510795047 | 0.132073 | 0.16482 | -6.20657573 |
| SERPINE  | -0.114803692 | 6.37414752 | -1.510499574 | 0.132148 | 0.1649  | -6.20701803 |
| NAIP     | -0.061009029 | 0.30073044 | -1.509948342 | 0.132289 | 0.16507 | -6.20784295 |
| STARD6   | -0.013956421 | 0.06134056 | -1.509886366 | 0.132305 | 0.16507 | -6.20793568 |
| FLRT2    | -0.101193418 | 0.92468197 | -1.509813484 | 0.132323 | 0.16509 | -6.20804472 |
| FGF14    | 0.049014637  | 0.2098233  | 1.509619071  | 0.132373 | 0.16513 | -6.20833557 |
| PRSS3    | 0.068256805  | 0.39288454 | 1.509483119  | 0.132408 | 0.16517 | -6.20853893 |
| TMEM44   | -0.118884754 | 3.30454011 | -1.509438137 | 0.132419 | 0.16517 | -6.20860622 |
| CYP3A4   | 0.012715846  | 0.04059196 | 1.507969709  | 0.132794 | 0.16562 | -6.21080157 |



|         |              |            |              |          |         |             |
|---------|--------------|------------|--------------|----------|---------|-------------|
| CHRD    | -0.096234763 | 1.16599221 | -1.507857007 | 0.132823 | 0.16565 | -6.21096997 |
| KREMEN  | 0.06960367   | 0.54213257 | 1.507624201  | 0.132883 | 0.16571 | -6.21131781 |
| F2RL1   | 0.186180326  | 4.29282962 | 1.507394161  | 0.132942 | 0.16577 | -6.21166146 |
| CASD1   | -0.124131423 | 4.52224867 | -1.50733678  | 0.132956 | 0.16578 | -6.21174717 |
| GRAMD1  | 0.0958248    | 5.24840835 | 1.506415843  | 0.133192 | 0.16606 | -6.21312236 |
| CIP2A   | -0.079974634 | 1.34117812 | -1.506192273 | 0.13325  | 0.16612 | -6.21345608 |
| CYP24A  | 0.352161565  | 2.1217499  | 1.506052218  | 0.133286 | 0.16615 | -6.21366512 |
| NKX6-1  | -0.321098572 | 1.93300723 | -1.505154355 | 0.133516 | 0.16642 | -6.21500475 |
| KLK3    | 0.20018111   | 0.5608832  | 1.505128398  | 0.133523 | 0.16642 | -6.21504346 |
| EIF2AK2 | -0.121341421 | 4.03147215 | -1.503599546 | 0.133916 | 0.1669  | -6.21732269 |
| HOXD3   | 0.02195376   | 0.14935217 | 1.503315265  | 0.133989 | 0.16698 | -6.21774624 |
| ZNF711  | -0.136125251 | 2.49774819 | -1.503135076 | 0.134036 | 0.16702 | -6.21801467 |
| MMP17   | 0.159299113  | 0.81837522 | 1.503099536  | 0.134045 | 0.16702 | -6.21806761 |
| DUSP9   | 0.045662175  | 0.08166049 | 1.502736599  | 0.134138 | 0.16713 | -6.21860817 |
| ZNF496  | -0.09755607  | 3.87119372 | -1.501081169 | 0.134566 | 0.16765 | -6.22107214 |
| SLIT1   | -0.408093282 | 3.52248111 | -1.501051478 | 0.134574 | 0.16765 | -6.22111631 |
| IL17RA  | -0.091732832 | 3.34726708 | -1.500979266 | 0.134592 | 0.16766 | -6.22122373 |
| AMER3   | -0.018659239 | 0.04351878 | -1.500485535 | 0.13472  | 0.1678  | -6.22195804 |
| PDZRN4  | 0.356398319  | 1.91517956 | 1.500231577  | 0.134786 | 0.16787 | -6.22233566 |
| NUP153  | -0.129215635 | 4.180661   | -1.499719009 | 0.134918 | 0.16803 | -6.22309761 |
| SPRY1   | -0.201746723 | 6.1052357  | -1.499218624 | 0.135048 | 0.16818 | -6.2238412  |
| KLHL18  | -0.108254306 | 3.6509345  | -1.498901638 | 0.13513  | 0.16827 | -6.22431213 |
| NFAT5   | 0.199098943  | 3.25667708 | 1.497909096  | 0.135388 | 0.16857 | -6.22578606 |
| MDFI    | 0.246637009  | 3.13957915 | 1.497804168  | 0.135415 | 0.1686  | -6.22594182 |
| ARRDC3  | -0.170563798 | 7.08084876 | -1.497735867 | 0.135433 | 0.16861 | -6.22604321 |
| UNC13A  | 0.046017089  | 0.22672087 | 1.497658953  | 0.135453 | 0.16862 | -6.22615737 |
| SLFN13  | 0.115621451  | 3.28546018 | 1.497617901  | 0.135463 | 0.16862 | -6.2262183  |
| ANKRD1  | 0.09773908   | 0.27640045 | 1.495633872  | 0.13598  | 0.16925 | -6.22916116 |
| VSIG8   | -0.082665073 | 0.61773842 | -1.495131966 | 0.136111 | 0.1694  | -6.22990502 |
| JAG2    | -0.123379154 | 3.94300366 | -1.49473326  | 0.136215 | 0.16952 | -6.23049575 |
| OTUD3   | 0.103126202  | 2.82675297 | 1.494333148  | 0.136319 | 0.16963 | -6.23108841 |
| PHF2    | -0.124087733 | 5.19170776 | -1.493450816 | 0.13655  | 0.16991 | -6.2323948  |
| CNN3    | 0.130418448  | 7.5621591  | 1.493188661  | 0.136618 | 0.16998 | -6.23278281 |
| TBX18   | 0.057450588  | 0.38463443 | 1.492341593  | 0.13684  | 0.17024 | -6.23403606 |
| JAKMIP1 | -0.096512339 | 0.68600293 | -1.492283847 | 0.136855 | 0.17025 | -6.23412147 |
| L3MBTL1 | -0.112373047 | 1.79218657 | -1.49149207  | 0.137062 | 0.1705  | -6.23529223 |
| ATG16L2 | -0.134786105 | 2.96247719 | -1.490852064 | 0.13723  | 0.17069 | -6.23623814 |
| CTSV    | -0.103684923 | 1.17268344 | -1.490788565 | 0.137247 | 0.1707  | -6.23633197 |
| MTSS2   | 0.104488439  | 3.18095136 | 1.490731668  | 0.137262 | 0.17071 | -6.23641604 |
| PTPDC1  | 0.116407157  | 2.17514681 | 1.490280654  | 0.13738  | 0.17084 | -6.23708233 |

|         |              |            |              |          |         |             |
|---------|--------------|------------|--------------|----------|---------|-------------|
| CLSTN2  | -0.099991917 | 0.48191268 | -1.489776236 | 0.137513 | 0.17099 | -6.23782727 |
| BAHCC1  | -0.121156548 | 2.97280773 | -1.489502509 | 0.137585 | 0.17107 | -6.23823142 |
| ZFP37   | -0.117919058 | 1.9341348  | -1.489424017 | 0.137606 | 0.17108 | -6.2383473  |
| AGO1    | -0.089862659 | 3.20234835 | -1.489402684 | 0.137611 | 0.17108 | -6.23837879 |
| DMP1    | 0.078819014  | 0.24396817 | 1.489335083  | 0.137629 | 0.17109 | -6.23847859 |
| SATB1   | -0.139192811 | 3.94037938 | -1.489049077 | 0.137704 | 0.17117 | -6.23890074 |
| TMCC1   | -0.10664619  | 3.84601721 | -1.48842597  | 0.137868 | 0.17136 | -6.23982019 |
| HDX     | -0.073938565 | 1.46193469 | -1.488016964 | 0.137976 | 0.17148 | -6.24042351 |
| DOC2B   | -0.11229019  | 1.51502196 | -1.487839993 | 0.138023 | 0.17153 | -6.24068451 |
| FAM110E | 0.151430798  | 3.8498557  | 1.487700229  | 0.13806  | 0.17156 | -6.24089061 |
| UHRF1B  | -0.118751113 | 3.22225015 | -1.487477041 | 0.138118 | 0.17162 | -6.2412197  |
| PID1    | -0.130950281 | 1.07622273 | -1.487417516 | 0.138134 | 0.17163 | -6.24130746 |
| GBF1    | -0.114765227 | 5.69844014 | -1.486198483 | 0.138456 | 0.17202 | -6.24310396 |
| RIMS3   | -0.114648715 | 1.43370173 | -1.485185412 | 0.138724 | 0.17234 | -6.24459583 |
| ZMYM3   | -0.115649168 | 4.79648416 | -1.483632362 | 0.139136 | 0.17283 | -6.24688095 |
| PDLIM7  | 0.141310579  | 4.89580872 | 1.48326546   | 0.139233 | 0.17294 | -6.24742046 |
| SRRM4   | -0.100004724 | 0.22092032 | -1.482690909 | 0.139385 | 0.17312 | -6.24826504 |
| TMEM26  | -0.056723114 | 0.74604788 | -1.482142591 | 0.139531 | 0.17329 | -6.24907075 |
| IGFALS  | -0.216743825 | 2.03666901 | -1.481712658 | 0.139646 | 0.17342 | -6.24970231 |
| CALML4  | -0.054616495 | 0.74087425 | -1.48024806  | 0.140036 | 0.17389 | -6.25185239 |
| TXNDC2  | 0.012499099  | 0.06134839 | 1.479113699  | 0.140338 | 0.17425 | -6.25351623 |
| TUT4    | -0.123467032 | 3.08234359 | -1.478883695 | 0.1404   | 0.17431 | -6.25385344 |
| TEX38   | -0.056990477 | 0.54198898 | -1.478849494 | 0.140409 | 0.17431 | -6.25390358 |
| ADAMTS  | 0.012054568  | 0.03179866 | 1.478223369  | 0.140576 | 0.17451 | -6.25482126 |
| PARPBP  | -0.059435841 | 0.91181044 | -1.478132836 | 0.1406   | 0.17453 | -6.25495392 |
| KIR2DL4 | -0.078566472 | 0.39986758 | -1.478012456 | 0.140633 | 0.17455 | -6.2551303  |
| COL26A1 | 0.122387514  | 0.83191203 | 1.477463122  | 0.14078  | 0.17472 | -6.255935   |
| CGREF1  | 0.082960758  | 0.47943515 | 1.476810006  | 0.140955 | 0.17492 | -6.25689135 |
| AIFM3   | -0.066055329 | 0.70676812 | -1.476797728 | 0.140958 | 0.17492 | -6.25690933 |
| SLC36A1 | 0.085561714  | 2.08624559 | 1.476688869  | 0.140987 | 0.17494 | -6.25706869 |
| LRRK2   | 0.378436659  | 5.11028273 | 1.476627339  | 0.141004 | 0.17495 | -6.25715876 |
| SEC16B  | -0.019983709 | 0.12797013 | -1.475498019 | 0.141306 | 0.17531 | -6.25881122 |
| HOPX    | -0.164501351 | 6.47812995 | -1.474603827 | 0.141547 | 0.1756  | -6.26011876 |
| SEPTIN6 | 0.125733679  | 3.42078533 | 1.473500348  | 0.141844 | 0.17595 | -6.26173126 |
| SLC39A6 | -0.162643102 | 5.92908901 | -1.473255914 | 0.141909 | 0.17602 | -6.26208828 |
| ZNF280C | -0.087821107 | 1.82241868 | -1.472650765 | 0.142073 | 0.17621 | -6.26297193 |
| AP3B2   | -0.131886615 | 1.72792045 | -1.472506723 | 0.142111 | 0.17625 | -6.26318221 |
| IGSF5   | -0.06652212  | 0.33810934 | -1.472036214 | 0.142238 | 0.17639 | -6.26386894 |
| HTR6    | 0.01147379   | 0.03584112 | 1.471888235  | 0.142278 | 0.17642 | -6.26408487 |
| SRGAP2  | 0.055252727  | 0.64213634 | 1.471870833  | 0.142283 | 0.17642 | -6.26411027 |

|         |              |            |              |          |         |             |
|---------|--------------|------------|--------------|----------|---------|-------------|
| SUFU    | 0.094939295  | 2.7212758  | 1.471521676  | 0.142377 | 0.17652 | -6.26461968 |
| WDR90   | -0.108458213 | 3.14932567 | -1.470244372 | 0.142722 | 0.17694 | -6.26648224 |
| RLIM    | -0.108615644 | 4.46790311 | -1.470072238 | 0.142769 | 0.17698 | -6.26673312 |
| KDSR    | -0.092850587 | 4.49481546 | -1.469994488 | 0.14279  | 0.177   | -6.26684643 |
| RYBP    | -0.101881597 | 4.46830773 | -1.469587461 | 0.1429   | 0.17712 | -6.26743952 |
| HGFAC   | 0.051809979  | 0.19647134 | 1.469329702  | 0.14297  | 0.17719 | -6.26781503 |
| LCN6    | 0.339467149  | 2.11156494 | 1.469310103  | 0.142975 | 0.17719 | -6.26784358 |
| ZNF579  | -0.1105789   | 4.14449621 | -1.469013416 | 0.143056 | 0.17728 | -6.26827571 |
| FABP1   | -0.031158128 | 0.09005816 | -1.46884889  | 0.1431   | 0.17732 | -6.2685153  |
| BCL11B  | -0.131692602 | 1.07382153 | -1.468256013 | 0.143261 | 0.1775  | -6.26937849 |
| TRIB1   | -0.137516973 | 7.83820919 | -1.467840282 | 0.143374 | 0.17763 | -6.26998355 |
| FAM83D  | -0.102268423 | 1.0523162  | -1.467641046 | 0.143428 | 0.17769 | -6.27027347 |
| APOBEC  | 0.152386075  | 3.11782708 | 1.466208411  | 0.143818 | 0.17815 | -6.272357   |
| FAM76B  | -0.11176602  | 2.92353647 | -1.466070412 | 0.143855 | 0.17819 | -6.27255759 |
| FAM187E | -0.027834676 | 0.13349594 | -1.464805347 | 0.1442   | 0.1786  | -6.27439559 |
| NOTCH2  | 0.03591332   | 0.25959142 | 1.464440805  | 0.144299 | 0.1787  | -6.27492493 |
| NOTCH2  | 0.03591332   | 0.25959142 | 1.464440805  | 0.144299 | 0.1787  | -6.27492493 |
| OPN4    | -0.075852686 | 0.33157019 | -1.463520577 | 0.144551 | 0.179   | -6.27626061 |
| CHRNA2  | -0.057914336 | 0.08096688 | -1.462378868 | 0.144863 | 0.17937 | -6.27791662 |
| PON3    | -0.180026007 | 1.87408816 | -1.462080154 | 0.144945 | 0.17946 | -6.27834968 |
| CNKSRR3 | -0.076491508 | 0.97142989 | -1.461813308 | 0.145018 | 0.17954 | -6.27873647 |
| PIAS3   | 0.140039487  | 4.24584124 | 1.461306011  | 0.145157 | 0.1797  | -6.27947159 |
| ESYT1   | 0.119885086  | 6.10108372 | 1.460921391  | 0.145262 | 0.17981 | -6.28002878 |
| HEATR5L | -0.117405426 | 3.78381117 | -1.460377071 | 0.145412 | 0.17998 | -6.28081707 |
| RFX7    | -0.102886006 | 2.76721806 | -1.460290534 | 0.145435 | 0.18    | -6.28094237 |
| ZNF367  | -0.128766881 | 2.19201795 | -1.46017431  | 0.145467 | 0.18002 | -6.28111064 |
| RASSF8  | -0.122399214 | 3.04212732 | -1.460163959 | 0.14547  | 0.18002 | -6.28112563 |
| PTPN14  | 0.140022404  | 2.92860408 | 1.458531978  | 0.145919 | 0.18056 | -6.28348702 |
| SINHCAF | 0.133299809  | 4.23052488 | 1.458298582  | 0.145983 | 0.18063 | -6.28382452 |
| IQCN    | -0.16941447  | 2.33755962 | -1.458176445 | 0.146017 | 0.18065 | -6.28400111 |
| ZNF667  | -0.109756044 | 2.71790533 | -1.456735033 | 0.146414 | 0.18113 | -6.2860841  |
| WDR27   | -0.128852657 | 2.21282265 | -1.456145941 | 0.146577 | 0.18132 | -6.28693482 |
| TSC22D4 | -0.091916676 | 5.656695   | -1.455485846 | 0.146759 | 0.18153 | -6.28788767 |
| ARHGAP  | -0.112601103 | 4.74221318 | -1.455284886 | 0.146814 | 0.18159 | -6.28817767 |
| TMEM63  | 0.133236769  | 5.0914005  | 1.4549577    | 0.146905 | 0.18169 | -6.28864974 |
| RORB    | 0.053733452  | 0.27503561 | 1.454304188  | 0.147086 | 0.1819  | -6.28959233 |
| CARS2   | -0.069364626 | 3.65314907 | -1.45410424  | 0.147141 | 0.18195 | -6.28988065 |
| RAB32   | 0.139537767  | 4.72233463 | 1.452719684  | 0.147525 | 0.18241 | -6.29187601 |
| TNR     | 0.016623122  | 0.05212055 | 1.452659939  | 0.147542 | 0.18242 | -6.29196207 |
| ANXA8   | 0.082061856  | 0.17785474 | 1.452238192  | 0.147659 | 0.18255 | -6.29256948 |

|          |              |            |              |          |         |             |
|----------|--------------|------------|--------------|----------|---------|-------------|
| RPA4     | 0.017643549  | 0.05293461 | 1.450449798  | 0.148156 | 0.18315 | -6.29514323 |
| CAMSAP   | -0.109230991 | 4.56923677 | -1.449775291 | 0.148344 | 0.18337 | -6.29611313 |
| GPATCH   | -0.087975539 | 2.15994775 | -1.449508592 | 0.148418 | 0.18345 | -6.29649651 |
| GLP2R    | -0.034606523 | 0.07833773 | -1.449299363 | 0.148477 | 0.18351 | -6.29679722 |
| TMEM13   | -0.086034918 | 0.5887542  | -1.448852835 | 0.148601 | 0.18365 | -6.29743885 |
| USP15    | -0.100799414 | 2.87873393 | -1.448289503 | 0.148759 | 0.18383 | -6.29824805 |
| DCK      | -0.124363804 | 4.23903994 | -1.447825106 | 0.148888 | 0.18398 | -6.29891489 |
| HIF1A    | 0.158478022  | 6.776774   | 1.446755871  | 0.149188 | 0.18434 | -6.30044944 |
| PDZK1    | -0.064580138 | 0.41955977 | -1.446259694 | 0.149327 | 0.18449 | -6.30116117 |
| SEL1L2   | -0.018498028 | 0.03647453 | -1.446195655 | 0.149344 | 0.1845  | -6.30125301 |
| FAM78B   | -0.052427089 | 0.82082619 | -1.445836306 | 0.149445 | 0.18461 | -6.3017683  |
| SUN1     | -0.109887068 | 4.82292748 | -1.445682364 | 0.149488 | 0.18465 | -6.30198901 |
| CMYA5    | 0.159190694  | 2.89577458 | 1.445314741  | 0.149591 | 0.18477 | -6.30251597 |
| ANGPTL   | 0.062099359  | 0.11774557 | 1.444238688  | 0.149894 | 0.18513 | -6.30405767 |
| TEN1     | -0.028844479 | 0.29087788 | -1.443329704 | 0.150149 | 0.18543 | -6.30535913 |
| HSPG2    | -0.223157775 | 5.32474283 | -1.442024075 | 0.150517 | 0.18587 | -6.30722707 |
| KCNK7    | 0.085616643  | 0.69381545 | 1.440848828  | 0.150848 | 0.18627 | -6.30890706 |
| STON1    | -0.117215591 | 1.64318594 | -1.440567132 | 0.150928 | 0.18635 | -6.30930954 |
| ENTPD4   | -0.09977383  | 4.12187213 | -1.439959633 | 0.1511   | 0.18655 | -6.31017725 |
| ZNF224   | -0.088978911 | 2.56269345 | -1.439338305 | 0.151275 | 0.18675 | -6.31106434 |
| PCDHGE   | 0.193043336  | 2.42584406 | 1.439096482  | 0.151344 | 0.18682 | -6.3114095  |
| GNB3     | 0.131795589  | 1.45232978 | 1.438766494  | 0.151437 | 0.18692 | -6.3118804  |
| TMEM11   | 0.036290845  | 0.11522086 | 1.438735036  | 0.151446 | 0.18692 | -6.31192529 |
| CNKSR1   | -0.102812491 | 4.92571277 | -1.438591564 | 0.151487 | 0.18696 | -6.31212999 |
| ACOT12   | 0.072243932  | 0.24285312 | 1.438502325  | 0.151512 | 0.18698 | -6.31225731 |
| POM121   | -0.094254378 | 3.73071861 | -1.437349167 | 0.151839 | 0.18737 | -6.31390177 |
| MACF1    | 0.142403198  | 4.69331237 | 1.437254739  | 0.151866 | 0.18737 | -6.31403637 |
| CASP10   | -0.115134306 | 3.21714637 | -1.437247527 | 0.151868 | 0.18737 | -6.31404665 |
| ZNF358   | -0.108974093 | 6.60604291 | -1.436809912 | 0.151992 | 0.18751 | -6.31467033 |
| TOR1AIF  | -0.094522305 | 3.64889437 | -1.436453941 | 0.152093 | 0.18762 | -6.31517751 |
| FZD1     | -0.176924265 | 6.40746791 | -1.436431509 | 0.152099 | 0.18762 | -6.31520947 |
| PLXNB2   | 0.149534203  | 8.01322874 | 1.435617249  | 0.152331 | 0.18789 | -6.31636914 |
| KIAA031  | 0.07318409   | 0.2827295  | 1.435529866  | 0.152356 | 0.18791 | -6.31649355 |
| GPSM1    | 0.135777511  | 3.48972881 | 1.435008753  | 0.152504 | 0.18808 | -6.31723533 |
| C20orf20 | -0.065504887 | 0.4181216  | -1.434702075 | 0.152591 | 0.18817 | -6.31767175 |
| RNF17    | -0.048339777 | 0.07202584 | -1.4344981   | 0.15265  | 0.18823 | -6.31796197 |
| OGT      | 0.147776919  | 5.65756919 | 1.432750175  | 0.153148 | 0.18883 | -6.32044726 |
| SMC4     | 0.147393309  | 2.87249789 | 1.431998176  | 0.153363 | 0.18908 | -6.32151558 |
| TDRD10   | 0.151398525  | 2.86346152 | 1.431808518  | 0.153417 | 0.18913 | -6.32178492 |
| PYDC1    | 0.093779284  | 0.37396054 | 1.431456227  | 0.153518 | 0.18924 | -6.32228515 |

|          |              |            |              |          |         |             |
|----------|--------------|------------|--------------|----------|---------|-------------|
| HOXA2    | -0.046381086 | 0.39711713 | -1.431356878 | 0.153547 | 0.18927 | -6.32242619 |
| ZNF114   | 0.136754629  | 3.2753158  | 1.431315934  | 0.153558 | 0.18927 | -6.32248432 |
| ACTN3    | 0.015416165  | 0.05871533 | 1.431169477  | 0.1536   | 0.1893  | -6.32269222 |
| NTRK3    | -0.138715634 | 0.88988066 | -1.430909538 | 0.153675 | 0.18938 | -6.32306116 |
| KCNJ15   | -0.167695742 | 6.29287003 | -1.430636655 | 0.153753 | 0.18946 | -6.3234484  |
| CSNK2A   | -0.071391767 | 5.01054157 | -1.430604072 | 0.153762 | 0.18946 | -6.32349463 |
| FAM72A   | 0.02165404   | 0.17672372 | 1.429222123  | 0.154158 | 0.18994 | -6.32545455 |
| IL5RA    | -0.03063154  | 0.12105105 | -1.42884212  | 0.154268 | 0.19006 | -6.32599316 |
| OSBPL1   | 0.137752775  | 2.21440167 | 1.428557822  | 0.154349 | 0.19015 | -6.32639602 |
| DGKZ     | -0.079921639 | 3.70140506 | -1.428363237 | 0.154405 | 0.1902  | -6.32667171 |
| PPP1R1   | -0.148689737 | 2.30707379 | -1.428249918 | 0.154438 | 0.19023 | -6.32683225 |
| FUCA1    | -0.117144217 | 7.9399963  | -1.426920057 | 0.15482  | 0.19068 | -6.32871528 |
| FAM3C    | -0.133905252 | 6.26029446 | -1.426894392 | 0.154828 | 0.19068 | -6.3287516  |
| FLNB     | -0.103665833 | 6.14116654 | -1.426791308 | 0.154857 | 0.1907  | -6.32889749 |
| POLA1    | -0.092664806 | 2.80782679 | -1.426159208 | 0.15504  | 0.19091 | -6.32979183 |
| VASP     | 0.10152909   | 6.18452962 | 1.42519532   | 0.155318 | 0.19124 | -6.33115487 |
| SHC4     | -0.113171432 | 0.75164751 | -1.424978758 | 0.15538  | 0.1913  | -6.33146098 |
| MAD2L1   | -0.08211778  | 1.57266934 | -1.42482166  | 0.155426 | 0.19135 | -6.33168301 |
| C1orf167 | -0.010044314 | 0.0502408  | -1.42477019  | 0.155441 | 0.19135 | -6.33175575 |
| CD244    | 0.089247045  | 0.71447931 | 1.424368524  | 0.155557 | 0.19148 | -6.33232331 |
| PAX2     | -0.088356063 | 0.10659995 | -1.424022492 | 0.155657 | 0.19159 | -6.33281214 |
| GNB5     | -0.101508245 | 3.57288701 | -1.423853402 | 0.155706 | 0.19162 | -6.33305096 |
| PLRG1    | 0.107383327  | 5.44600413 | 1.423843006  | 0.155709 | 0.19162 | -6.33306564 |
| SRPK1    | -0.097027263 | 3.67059154 | -1.423518755 | 0.155802 | 0.19173 | -6.33352353 |
| UBE2F-S  | -0.01283817  | 0.08193398 | -1.423439168 | 0.155825 | 0.19174 | -6.3336359  |
| RSPH10   | -0.00833374  | 0.02419884 | -1.423363949 | 0.155847 | 0.19175 | -6.3337421  |
| NUDT10   | 0.10076099   | 0.66911601 | 1.423231445  | 0.155886 | 0.19179 | -6.33392917 |
| ZBED6    | 0.181872343  | 1.68455929 | 1.422926324  | 0.155974 | 0.19188 | -6.33435987 |
| KIF3C    | -0.142579751 | 2.51462364 | -1.422851781 | 0.155995 | 0.19189 | -6.33446507 |
| NIBAN3   | 0.077157702  | 0.27488524 | 1.422599771  | 0.156069 | 0.19197 | -6.33482072 |
| SHCBP1   | -0.010725065 | 0.03181979 | -1.420712679 | 0.156616 | 0.19263 | -6.33748184 |
| SLITRK2  | -0.06708212  | 0.1510564  | -1.420476408 | 0.156685 | 0.1927  | -6.33781478 |
| LGALS9   | 0.019280178  | 0.04074943 | 1.420419053  | 0.156701 | 0.19271 | -6.33789559 |
| FKBP6    | -0.014925524 | 0.05407952 | -1.420056274 | 0.156807 | 0.19282 | -6.33840667 |
| LINGO3   | 0.051937136  | 0.30308389 | 1.41956871   | 0.156949 | 0.19298 | -6.33909334 |
| ITIH4    | -0.033681938 | 0.24643817 | -1.419148506 | 0.157071 | 0.19312 | -6.33968496 |
| MYMK     | -0.064215823 | 0.14660958 | -1.417447343 | 0.157567 | 0.19372 | -6.34207831 |
| ZNF528   | -0.108215762 | 3.10982177 | -1.416575633 | 0.157822 | 0.19401 | -6.34330362 |
| ZNF724   | 0.079794191  | 0.74914838 | 1.41630497   | 0.157901 | 0.19409 | -6.34368392 |
| TMCO6    | -0.089808154 | 3.41088468 | -1.416295428 | 0.157904 | 0.19409 | -6.34369733 |

|          |              |            |              |          |         |             |
|----------|--------------|------------|--------------|----------|---------|-------------|
| AVIL     | 0.116759652  | 1.94928901 | 1.414975866  | 0.15829  | 0.19455 | -6.34555038 |
| BCL9     | 0.147795237  | 4.73427295 | 1.413587768  | 0.158697 | 0.19503 | -6.34749784 |
| TDP1     | 0.077366992  | 2.12309735 | 1.413558049  | 0.158705 | 0.19503 | -6.34753951 |
| WSB1     | 0.171551478  | 5.06692792 | 1.413511482  | 0.158719 | 0.19503 | -6.34760481 |
| MIP      | -0.016314224 | 0.08698972 | -1.412615742 | 0.158982 | 0.19534 | -6.34886044 |
| SH3PXD   | 0.132205867  | 3.75511194 | 1.412590899  | 0.15899  | 0.19534 | -6.34889526 |
| CD46     | -0.116439549 | 6.00621163 | -1.411735852 | 0.159241 | 0.19563 | -6.35009309 |
| RBM44    | -0.026773279 | 0.2074168  | -1.411433964 | 0.15933  | 0.19573 | -6.35051584 |
| BMP4     | 0.228963725  | 2.84439955 | 1.409901382  | 0.159782 | 0.19627 | -6.3526606  |
| GJB7     | -0.017419724 | 0.04741873 | -1.409853133 | 0.159796 | 0.19627 | -6.35272808 |
| HS3ST5   | -0.014278805 | 0.04001788 | -1.409761606 | 0.159823 | 0.19629 | -6.35285609 |
| CALHM1   | 0.03419461   | 0.10215103 | 1.409435098  | 0.159919 | 0.19639 | -6.35331268 |
| GIPC1    | -0.093333888 | 6.45653288 | -1.408823589 | 0.1601   | 0.1966  | -6.35416753 |
| RIMBP3C  | -0.020157985 | 0.12162735 | -1.4087504   | 0.160121 | 0.19661 | -6.35426982 |
| ZNF266   | -0.105030588 | 4.0676897  | -1.408402625 | 0.160224 | 0.19673 | -6.3547558  |
| AKNAD1   | -0.023778405 | 0.04005228 | -1.407831112 | 0.160393 | 0.19692 | -6.35555418 |
| MAPK8IF  | -0.083330847 | 0.88088636 | -1.406150404 | 0.160891 | 0.19752 | -6.35790019 |
| ZNF264   | -0.097511949 | 3.3758743  | -1.406003468 | 0.160935 | 0.19755 | -6.35810516 |
| ZNF519   | -0.046375069 | 0.66425086 | -1.405606801 | 0.161052 | 0.19768 | -6.35865839 |
| LRRC10f  | 0.1136102    | 1.0339347  | 1.40445158   | 0.161395 | 0.19809 | -6.36026869 |
| LCMT1    | -0.080757359 | 5.64466403 | -1.40432678  | 0.161433 | 0.19812 | -6.36044258 |
| KANSL1l  | -0.117923422 | 3.15394971 | -1.404147427 | 0.161486 | 0.19817 | -6.36069245 |
| C3orf20  | -0.020104248 | 0.12766529 | -1.403424979 | 0.161701 | 0.19842 | -6.36169861 |
| PRDM1    | 0.203601732  | 5.30928374 | 1.402949259  | 0.161843 | 0.19858 | -6.36236088 |
| KIRREL3  | -0.07384333  | 0.13367475 | -1.402463745 | 0.161987 | 0.19875 | -6.36303655 |
| NPIPA5   | -0.149774236 | 1.66894684 | -1.402197223 | 0.162067 | 0.19883 | -6.36340736 |
| NDP      | -0.12168928  | 0.60353522 | -1.402096111 | 0.162097 | 0.19885 | -6.36354802 |
| C10orf10 | -0.016709858 | 0.07421128 | -1.401937277 | 0.162144 | 0.1989  | -6.36376896 |
| KIR2DL1  | 0.028665535  | 0.10600933 | 1.401700344  | 0.162215 | 0.19897 | -6.36409848 |
| HIVEP2   | 0.11581415   | 3.77436887 | 1.401511435  | 0.162271 | 0.19902 | -6.36436118 |
| DENND6   | -0.110222878 | 3.60072254 | -1.401005589 | 0.162422 | 0.19919 | -6.36506443 |
| SMIM29   | 0.098571954  | 5.74794001 | 1.400956019  | 0.162437 | 0.1992  | -6.36513333 |
| NPBWR1   | 0.052164189  | 0.13794153 | 1.400669307  | 0.162523 | 0.19929 | -6.36553181 |
| E2F2     | 0.080498615  | 0.89735755 | 1.399283957  | 0.162937 | 0.19976 | -6.36745606 |
| TEAD2    | -0.140966327 | 3.85962218 | -1.399251453 | 0.162947 | 0.19976 | -6.36750118 |
| ABCA13   | -0.13517366  | 0.89775288 | -1.399250934 | 0.162947 | 0.19976 | -6.3675019  |
| KLF14    | -0.012629567 | 0.03463394 | -1.399215116 | 0.162958 | 0.19976 | -6.36755163 |
| SGO2     | -0.063720127 | 1.14235213 | -1.397344929 | 0.163519 | 0.20042 | -6.37014621 |
| CKLF     | 0.133889537  | 4.57001894 | 1.397340486  | 0.16352  | 0.20042 | -6.37015237 |
| TAC1     | -0.070441888 | 0.1780732  | -1.397045353 | 0.163609 | 0.20052 | -6.37056151 |

|         |              |            |              |          |         |             |
|---------|--------------|------------|--------------|----------|---------|-------------|
| SCRIB   | 0.096980146  | 5.34962085 | 1.396981652  | 0.163628 | 0.20053 | -6.37064981 |
| PPRC1   | 0.102943832  | 4.41580759 | 1.396808274  | 0.16368  | 0.20058 | -6.37089011 |
| HSFX1   | -0.015300747 | 0.07362307 | -1.396199536 | 0.163863 | 0.20079 | -6.37173358 |
| KLHL33  | -0.025131754 | 0.1309438  | -1.395991338 | 0.163925 | 0.20085 | -6.37202197 |
| CCDC18  | 0.040432919  | 0.1120799  | 1.395949382  | 0.163938 | 0.20085 | -6.37208009 |
| FBXO28  | -0.102633955 | 4.2644194  | -1.395757608 | 0.163996 | 0.20091 | -6.37234569 |
| STPG4   | 0.011430431  | 0.05608417 | 1.395669023  | 0.164022 | 0.20092 | -6.37246836 |
| KRT36   | 0.021774295  | 0.0574597  | 1.39530974   | 0.164131 | 0.20104 | -6.37296583 |
| STARD9  | 0.077793368  | 1.14626587 | 1.394805506  | 0.164282 | 0.20121 | -6.37366379 |
| CYP4F3  | -0.090425015 | 0.10259322 | -1.393773145 | 0.164594 | 0.20158 | -6.375092   |
| EXOSC1  | -0.071438379 | 4.78145865 | -1.393575448 | 0.164653 | 0.20164 | -6.37536538 |
| GAL3ST4 | 0.15538271   | 2.10738282 | 1.392964231  | 0.164838 | 0.20185 | -6.37621035 |
| AMY2B   | 0.145952492  | 2.34365438 | 1.39235413   | 0.165022 | 0.20206 | -6.37705342 |
| PELI3   | 0.082347128  | 3.39373929 | 1.392123388  | 0.165092 | 0.20213 | -6.37737218 |
| KAT2A   | -0.120729681 | 5.21840719 | -1.392002435 | 0.165129 | 0.20216 | -6.37753924 |
| DCP2    | -0.079957589 | 3.10414914 | -1.391255769 | 0.165355 | 0.20241 | -6.37857027 |
| SEC24A  | -0.122995864 | 3.94979367 | -1.391249887 | 0.165356 | 0.20241 | -6.37857839 |
| ZDHHC2  | -0.088097588 | 0.15208143 | -1.390817883 | 0.165487 | 0.20256 | -6.37917467 |
| KCNK12  | -0.026208269 | 0.15101866 | -1.390298561 | 0.165645 | 0.20273 | -6.37989122 |
| WNT5A   | 0.191806981  | 3.29870346 | 1.389974878  | 0.165743 | 0.20284 | -6.38033771 |
| AXIN1   | -0.080650396 | 4.44200152 | -1.389863781 | 0.165777 | 0.20287 | -6.38049093 |
| CXCR5   | 0.031547371  | 0.07371974 | 1.389326149  | 0.16594  | 0.20305 | -6.38123224 |
| PROKR1  | -0.031184017 | 0.0332966  | -1.389105639 | 0.166007 | 0.20312 | -6.38153621 |
| MYZAP   | -0.07915054  | 0.89166348 | -1.388740587 | 0.166118 | 0.20324 | -6.38203933 |
| BGN     | 0.19636807   | 8.14320388 | 1.387297753  | 0.166556 | 0.20376 | -6.38402656 |
| INTS1   | -0.081797606 | 5.35073326 | -1.387058688 | 0.166629 | 0.20384 | -6.38435563 |
| NUP214  | -0.080430136 | 3.92349299 | -1.386008149 | 0.166949 | 0.20421 | -6.38580103 |
| HS3ST4  | 0.067393704  | 0.15780899 | 1.385061557  | 0.167238 | 0.20455 | -6.38710248 |
| CBFB    | 0.105654328  | 5.22476635 | 1.384996749  | 0.167258 | 0.20456 | -6.38719155 |
| VASH1   | -0.119897614 | 3.4027679  | -1.384933636 | 0.167277 | 0.20457 | -6.38727829 |
| PABPC4  | 0.089161002  | 5.95441144 | 1.384846916  | 0.167304 | 0.20459 | -6.38739746 |
| THEG    | 0.084035192  | 0.1951886  | 1.384198405  | 0.167502 | 0.20482 | -6.38828845 |
| RHBDL1  | -0.097083318 | 1.21892887 | -1.383988883 | 0.167566 | 0.20488 | -6.38857622 |
| CRX     | 0.009614165  | 0.02825744 | 1.383691335  | 0.167657 | 0.20498 | -6.38898483 |
| DDX43   | -0.164505187 | 0.80096119 | -1.383457351 | 0.167729 | 0.20505 | -6.38930608 |
| S100PBF | -0.08818237  | 3.12853356 | -1.383325093 | 0.167769 | 0.20508 | -6.38948764 |
| ARHGEF  | 0.117422705  | 5.27664357 | 1.382721394  | 0.167954 | 0.20529 | -6.39031617 |
| HS6ST2  | -0.336850292 | 2.06953515 | -1.382561009 | 0.168003 | 0.20534 | -6.39053623 |
| CTSD    | 0.112922856  | 9.5447951  | 1.382180234  | 0.16812  | 0.20547 | -6.39105858 |
| ARID5A  | 0.13643672   | 3.81237325 | 1.381770689  | 0.168246 | 0.2056  | -6.39162023 |

|         |              |            |              |          |         |             |
|---------|--------------|------------|--------------|----------|---------|-------------|
| NAALAD  | 0.079936436  | 1.33982126 | 1.381752324  | 0.168251 | 0.2056  | -6.39164541 |
| NKAIN1  | -0.10009399  | 0.17447343 | -1.381189974 | 0.168424 | 0.20579 | -6.39241634 |
| GPLD1   | -0.118484681 | 1.42727924 | -1.380641799 | 0.168592 | 0.20599 | -6.39316754 |
| P2RX6   | 0.036299841  | 0.10951621 | 1.380496824  | 0.168637 | 0.20603 | -6.39336616 |
| BSN     | 0.051344731  | 0.55342278 | 1.380000547  | 0.168789 | 0.2062  | -6.39404592 |
| CPEB2   | -0.111951309 | 3.08502179 | -1.379800371 | 0.168851 | 0.20626 | -6.39432004 |
| IL1R1   | 0.148456551  | 4.99749949 | 1.379583674  | 0.168918 | 0.20632 | -6.39461673 |
| SIDT1   | -0.115228614 | 0.76765764 | -1.379307171 | 0.169003 | 0.20641 | -6.39499525 |
| SMIM10L | -0.247947745 | 4.87059137 | -1.37909026  | 0.16907  | 0.20648 | -6.39529213 |
| TENM1   | 0.313783706  | 3.61350087 | 1.378794171  | 0.169161 | 0.20658 | -6.39569731 |
| GASK1A  | -0.108268511 | 0.98394307 | -1.378721562 | 0.169183 | 0.20659 | -6.39579666 |
| DSP     | 0.191100309  | 7.04867042 | 1.37799027   | 0.169409 | 0.20685 | -6.39679697 |
| PPP1R15 | -0.167640267 | 6.24393314 | -1.377855063 | 0.16945  | 0.20688 | -6.39698186 |
| ABHD2   | -0.161924761 | 4.20719611 | -1.377592714 | 0.169531 | 0.20697 | -6.39734055 |
| LOXL4   | -0.23658211  | 3.71225309 | -1.377351333 | 0.169606 | 0.20704 | -6.39767052 |
| CEP76   | -0.06822325  | 1.8833002  | -1.377293328 | 0.169624 | 0.20705 | -6.39774981 |
| APLP2   | -0.15579344  | 10.0908345 | -1.376382122 | 0.169905 | 0.20737 | -6.39899486 |
| SLC7A1  | 0.154085158  | 3.52991502 | 1.376379245  | 0.169906 | 0.20737 | -6.39899879 |
| NCKAP1  | -0.122463349 | 4.86100947 | -1.376185659 | 0.169966 | 0.20742 | -6.3992632  |
| FXRD    | -0.044438493 | 0.13184564 | -1.375914463 | 0.17005  | 0.20751 | -6.39963355 |
| ZNF676  | -0.149964763 | 2.21915775 | -1.37575606  | 0.170099 | 0.20756 | -6.39984983 |
| KLK13   | 0.165129662  | 1.6055982  | 1.375202242  | 0.17027  | 0.20775 | -6.40060582 |
| OR5K2   | -0.024571896 | 0.13026876 | -1.375040397 | 0.17032  | 0.2078  | -6.40082669 |
| RRM2    | 0.140917781  | 1.66797477 | 1.374132821  | 0.170601 | 0.20813 | -6.40206479 |
| ST6GAL1 | 0.060939455  | 0.55504421 | 1.373991049  | 0.170645 | 0.20816 | -6.40225812 |
| INTU    | -0.102792852 | 2.15154551 | -1.373250539 | 0.170875 | 0.20843 | -6.40326761 |
| VAMP4   | -0.102458805 | 4.28860416 | -1.37293713  | 0.170972 | 0.20853 | -6.4036947  |
| GRM8    | -0.050027636 | 0.36418484 | -1.372813053 | 0.171011 | 0.20856 | -6.40386375 |
| MRAS    | -0.101069535 | 4.51243127 | -1.372794654 | 0.171017 | 0.20856 | -6.40388882 |
| NKX6-3  | -0.032325098 | 0.06798068 | -1.372594325 | 0.171079 | 0.20862 | -6.40416174 |
| CDC6    | -0.104046175 | 1.65459633 | -1.372493766 | 0.17111  | 0.20864 | -6.40429872 |
| UBE2L6  | 0.130619267  | 6.23073762 | 1.372206052  | 0.171199 | 0.20874 | -6.40469058 |
| PBK     | -0.119269443 | 1.19175738 | -1.371892593 | 0.171297 | 0.20884 | -6.40511742 |
| IRF3    | -0.104359073 | 5.78959751 | -1.37178302  | 0.171331 | 0.20887 | -6.4052666  |
| MAP4K4  | 0.10598281   | 4.76328543 | 1.371679086  | 0.171363 | 0.20889 | -6.40540809 |
| RPRD1A  | -0.109289697 | 4.83604597 | -1.370725884 | 0.17166  | 0.20924 | -6.40670528 |
| KIF5B   | -0.100785127 | 6.31058712 | -1.370493534 | 0.171732 | 0.20931 | -6.40702134 |
| REV3L   | -0.120308489 | 2.9387659  | -1.369543275 | 0.172029 | 0.20966 | -6.40831342 |
| CYP2A7  | 0.011064334  | 0.04283101 | 1.369385078  | 0.172078 | 0.2097  | -6.40852844 |
| CXCL12  | -0.203099329 | 4.18171815 | -1.368656054 | 0.172306 | 0.20996 | -6.40951899 |



|         |              |            |              |          |         |             |
|---------|--------------|------------|--------------|----------|---------|-------------|
| PRR16   | -0.080773054 | 1.06221697 | -1.367211927 | 0.172757 | 0.2105  | -6.41147965 |
| ENTPD1  | -0.195382973 | 5.44022531 | -1.366717065 | 0.172912 | 0.21067 | -6.41215104 |
| BBX     | -0.123365847 | 4.41364394 | -1.366520656 | 0.172974 | 0.21073 | -6.41241745 |
| CHST3   | -0.123623777 | 3.47980373 | -1.366351925 | 0.173026 | 0.21078 | -6.41264628 |
| RAB31   | 0.144303448  | 5.23025975 | 1.365258763  | 0.173369 | 0.21118 | -6.41412816 |
| ACP7    | 0.022146006  | 0.06697361 | 1.365170253  | 0.173397 | 0.2112  | -6.4142481  |
| TBC1D22 | -0.097395917 | 4.31808088 | -1.364981589 | 0.173456 | 0.21125 | -6.41450371 |
| BST1    | -0.090783345 | 1.66268003 | -1.364971877 | 0.173459 | 0.21125 | -6.41451687 |
| MYO22   | 0.052571398  | 0.09363679 | 1.364932855  | 0.173472 | 0.21125 | -6.41456974 |
| GRM6    | -0.037732458 | 0.30649774 | -1.364493417 | 0.17361  | 0.2114  | -6.41516497 |
| ABCC5   | -0.084338944 | 1.88426696 | -1.363958912 | 0.173777 | 0.21159 | -6.41588871 |
| ZNF384  | -0.118877561 | 3.75713529 | -1.363742407 | 0.173846 | 0.21166 | -6.41618179 |
| OPCML   | 0.208359547  | 0.76225492 | 1.363571302  | 0.173899 | 0.21171 | -6.41641338 |
| DHX32   | -0.086014796 | 4.88513544 | -1.363149078 | 0.174032 | 0.21185 | -6.41698473 |
| ERFE    | -0.311713406 | 4.48659095 | -1.362736581 | 0.174162 | 0.212   | -6.41754276 |
| MYO5A   | 0.109262485  | 3.20387476 | 1.36203131   | 0.174384 | 0.21225 | -6.41849645 |
| PRR26   | -0.01207009  | 0.06438816 | -1.361485219 | 0.174556 | 0.21245 | -6.41923457 |
| CTXND1  | -0.305110792 | 3.11047916 | -1.361299014 | 0.174615 | 0.2125  | -6.41948618 |
| EDAR    | -0.067227858 | 0.14469628 | -1.361193585 | 0.174648 | 0.21253 | -6.41962863 |
| RAD21L1 | -0.01677381  | 0.06354191 | -1.360698308 | 0.174805 | 0.2127  | -6.42029767 |
| CCDC89  | -0.0874292   | 0.5020528  | -1.360652265 | 0.174819 | 0.21271 | -6.42035986 |
| NAV1    | 0.131716422  | 3.01368394 | 1.360453517  | 0.174882 | 0.21277 | -6.42062826 |
| SLC7A7  | 0.138925396  | 2.87328115 | 1.359597531  | 0.175153 | 0.21308 | -6.42178379 |
| CDR1    | 0.011414844  | 0.04257292 | 1.359390744  | 0.175218 | 0.21314 | -6.42206283 |
| NRAP    | 0.080163366  | 0.05840488 | 1.358400811  | 0.175531 | 0.2135  | -6.42339808 |
| GDNF    | 0.046066238  | 0.14034796 | 1.358390842  | 0.175534 | 0.2135  | -6.42341153 |
| ATP6V1E | 0.098032906  | 5.58922015 | 1.358097589  | 0.175627 | 0.2136  | -6.42380689 |
| LTBP3   | 0.159424132  | 6.70689269 | 1.357289494  | 0.175884 | 0.21389 | -6.42489592 |
| LAMP3   | 0.257073531  | 3.26890097 | 1.356970631  | 0.175985 | 0.214   | -6.42532547 |
| RAD51AI | -0.01688364  | 0.04926394 | -1.356563508 | 0.176114 | 0.21414 | -6.42587376 |
| PLK5    | -0.039958962 | 0.0587794  | -1.356157427 | 0.176243 | 0.21428 | -6.42642049 |
| GH1     | -0.036844264 | 0.13207824 | -1.355915673 | 0.17632  | 0.21436 | -6.4267459  |
| SLC16A8 | -0.087301909 | 0.96420082 | -1.355293968 | 0.176517 | 0.21459 | -6.42758247 |
| SPDYE4  | -0.018741106 | 0.09065442 | -1.3542978   | 0.176835 | 0.21496 | -6.42892214 |
| HIST3H2 | 0.082946     | 0.50326976 | 1.35339688   | 0.177122 | 0.21529 | -6.43013288 |
| OVGP1   | -0.071350359 | 1.07177334 | -1.352936844 | 0.177268 | 0.21545 | -6.43075081 |
| PTAR1   | -0.106210225 | 3.16813304 | -1.352793139 | 0.177314 | 0.21549 | -6.4309438  |
| SERPINC | -0.046387888 | 0.27926464 | -1.351784659 | 0.177636 | 0.21587 | -6.43229755 |
| PF4     | -0.071840522 | 0.3333796  | -1.351423672 | 0.177752 | 0.21599 | -6.43278189 |
| FAM9B   | 0.007811312  | 0.01366081 | 1.350850446  | 0.177935 | 0.2162  | -6.43355073 |

|          |              |            |              |          |         |             |
|----------|--------------|------------|--------------|----------|---------|-------------|
| LRRK1    | 0.107437294  | 1.91352423 | 1.350047424  | 0.178192 | 0.2165  | -6.43462723 |
| WNT2B    | -0.066355811 | 0.59308181 | -1.349814216 | 0.178267 | 0.21657 | -6.43493974 |
| TNRC18   | -0.108434852 | 5.00375789 | -1.349579878 | 0.178342 | 0.21665 | -6.43525372 |
| GDAP1L   | -0.057621263 | 0.22320566 | -1.34933979  | 0.178419 | 0.21673 | -6.43557534 |
| VIPR2    | -0.041077654 | 0.10858801 | -1.349184359 | 0.178469 | 0.21677 | -6.43578352 |
| IGSF10   | -0.056203087 | 0.25903806 | -1.348809406 | 0.178589 | 0.2169  | -6.43628564 |
| PPFIA2   | 0.018072791  | 0.12705709 | 1.348625419  | 0.178648 | 0.21696 | -6.43653198 |
| C8orf89  | -0.079598803 | 0.64479839 | -1.348211464 | 0.178781 | 0.2171  | -6.43708609 |
| MGAM     | 0.014056538  | 0.11112192 | 1.347699447  | 0.178945 | 0.21729 | -6.43777123 |
| ZNF460   | 0.090115367  | 1.11105673 | 1.347502043  | 0.179009 | 0.21735 | -6.43803532 |
| DNASE2   | 0.066764012  | 0.61710582 | 1.347423936  | 0.179034 | 0.21737 | -6.4381398  |
| IL15     | -0.107071851 | 2.65736423 | -1.347233915 | 0.179095 | 0.21742 | -6.43839395 |
| CXCR1    | -0.052334846 | 0.21130015 | -1.346970992 | 0.17918  | 0.21751 | -6.43874556 |
| NPFPR1   | 0.10833552   | 0.66234128 | 1.346862341  | 0.179215 | 0.21754 | -6.43889084 |
| NCOR1    | -0.099682856 | 4.64918715 | -1.34643601  | 0.179352 | 0.21769 | -6.43946078 |
| CDH19    | 0.040453808  | 0.10060249 | 1.345089897  | 0.179786 | 0.2182  | -6.44125916 |
| GLUD1    | -0.09714663  | 6.91837512 | -1.344424248 | 0.18     | 0.21844 | -6.4421478  |
| SAMD1    | 0.083923589  | 5.85326184 | 1.342075461  | 0.18076  | 0.21935 | -6.44527996 |
| PXT1     | -0.01411894  | 0.10496025 | -1.34178682  | 0.180853 | 0.21945 | -6.4456645  |
| MAP3K7   | -0.090834922 | 4.4398891  | -1.341717875 | 0.180875 | 0.21946 | -6.44575634 |
| ALDOB    | 0.086346562  | 0.27046038 | 1.341389499  | 0.180982 | 0.21957 | -6.44619369 |
| KIAA004i | -0.093731336 | 4.49569976 | -1.34132929  | 0.181001 | 0.21958 | -6.44627387 |
| NEIL1    | -0.122365969 | 2.82283956 | -1.340861565 | 0.181153 | 0.21975 | -6.4468966  |
| LMNA     | 0.12901771   | 7.7693589  | 1.340694477  | 0.181207 | 0.21978 | -6.44711902 |
| KCNA7    | 0.016124068  | 0.03344495 | 1.340693492  | 0.181207 | 0.21978 | -6.44712033 |
| MCOLN1   | -0.065076774 | 3.92230542 | -1.340349616 | 0.181319 | 0.2199  | -6.44757798 |
| LTN1     | -0.111570563 | 3.39164555 | -1.340254298 | 0.18135  | 0.21992 | -6.44770481 |
| MIER1    | -0.092099039 | 3.90845889 | -1.340240198 | 0.181355 | 0.21992 | -6.44772357 |
| USP37    | 0.125985269  | 1.48356033 | 1.339312621  | 0.181656 | 0.22026 | -6.44895736 |
| CHKB     | -0.120972864 | 2.5694285  | -1.339065898 | 0.181736 | 0.22035 | -6.44928539 |
| FSTL1    | 0.137152355  | 5.40401623 | 1.338243981  | 0.182003 | 0.22065 | -6.45037774 |
| HOXB9    | -0.03239736  | 0.06784817 | -1.338124508 | 0.182042 | 0.22069 | -6.45053647 |
| CALCR    | 0.026408272  | 0.13092754 | 1.338068667  | 0.18206  | 0.22069 | -6.45061065 |
| ANXA10   | 0.013882767  | 0.05921194 | 1.337379022  | 0.182285 | 0.22095 | -6.45152658 |
| SRD5A1   | -0.069356446 | 1.95915201 | -1.337119298 | 0.18237  | 0.22104 | -6.4518714  |
| FAM221/  | -0.08625093  | 1.85171006 | -1.336896777 | 0.182442 | 0.22111 | -6.45216678 |
| LPAR6    | -0.097302768 | 4.63317182 | -1.336650305 | 0.182522 | 0.22119 | -6.45249389 |
| STX11    | -0.173184613 | 3.21335996 | -1.336516963 | 0.182566 | 0.22123 | -6.45267084 |
| NUP107   | -0.082987845 | 3.22587304 | -1.336457901 | 0.182585 | 0.22123 | -6.45274921 |
| CD5L     | -0.077172079 | 0.19109489 | -1.336021597 | 0.182728 | 0.22139 | -6.45332803 |

|         |              |            |              |          |         |             |
|---------|--------------|------------|--------------|----------|---------|-------------|
| SULT1A3 | -0.013531729 | 0.07390432 | -1.335491046 | 0.182901 | 0.22158 | -6.45403164 |
| CEP120  | -0.092503528 | 3.63880163 | -1.335288688 | 0.182967 | 0.22165 | -6.45429993 |
| HTR1F   | -0.057552312 | 0.53371314 | -1.333963605 | 0.1834   | 0.22216 | -6.45605578 |
| ATXN1   | -0.098450764 | 3.21377426 | -1.333836818 | 0.183442 | 0.22219 | -6.45622369 |
| PRR32   | -0.0952622   | 0.40146585 | -1.332688872 | 0.183818 | 0.22263 | -6.45774328 |
| BEST2   | -0.009535854 | 0.03373499 | -1.331165594 | 0.184318 | 0.22322 | -6.45975772 |
| PRRG1   | 0.144166772  | 3.5940222  | 1.330876623  | 0.184413 | 0.22332 | -6.46013961 |
| PLCH2   | 0.169149196  | 1.63673527 | 1.330651583  | 0.184487 | 0.22339 | -6.46043695 |
| PLSCR1  | 0.123224405  | 4.42365848 | 1.330235165  | 0.184624 | 0.22354 | -6.46098704 |
| MEGF10  | 0.060791837  | 0.20641809 | 1.329899145  | 0.184734 | 0.22366 | -6.46143079 |
| PPFIBP1 | -0.118888702 | 4.23657793 | -1.329828002 | 0.184758 | 0.22367 | -6.46152473 |
| SLC5A9  | -0.059386197 | 0.46861733 | -1.329159995 | 0.184978 | 0.22392 | -6.46240653 |
| WDR97   | 0.07663194   | 0.81147279 | 1.328735051  | 0.185118 | 0.22407 | -6.46296726 |
| HAVCR1  | 0.016955164  | 0.05655322 | 1.328706652  | 0.185127 | 0.22407 | -6.46300472 |
| APOBEC  | -0.099543909 | 0.82499978 | -1.328416517 | 0.185223 | 0.22417 | -6.46338745 |
| MCF2    | -0.054781782 | 0.30055534 | -1.327831996 | 0.185415 | 0.22439 | -6.46415827 |
| ALDOC   | 0.198120929  | 2.41603145 | 1.327295314  | 0.185592 | 0.22459 | -6.4648657  |
| PCDHGC  | 0.07671585   | 0.40112214 | 1.32544905   | 0.186203 | 0.22531 | -6.46729723 |
| OR13J1  | 0.020679275  | 0.09245912 | 1.324879796  | 0.186391 | 0.22552 | -6.46804627 |
| RNF169  | 0.134273242  | 2.35698162 | 1.324826029  | 0.186409 | 0.22553 | -6.468117   |
| DAB2IP  | 0.134736804  | 5.47273173 | 1.324226739  | 0.186608 | 0.22575 | -6.46890518 |
| SLC2A14 | 0.018191336  | 0.0805526  | 1.324074356  | 0.186658 | 0.2258  | -6.46910553 |
| ERCC6   | 0.078938752  | 2.15347487 | 1.322533089  | 0.18717  | 0.2264  | -6.47113075 |
| ESR1    | 0.210258961  | 1.90580165 | 1.322383595  | 0.18722  | 0.22644 | -6.47132706 |
| B3GAT1  | 0.189946741  | 3.42394246 | 1.320479603  | 0.187853 | 0.22719 | -6.4738254  |
| CELSR2  | 0.136313117  | 5.11054249 | 1.320428535  | 0.18787  | 0.2272  | -6.47389236 |
| BDNF    | 0.126925057  | 1.12062598 | 1.320305963  | 0.187911 | 0.22723 | -6.47405307 |
| ESF1    | -0.10200418  | 4.01431781 | -1.320210014 | 0.187943 | 0.22725 | -6.47417886 |
| ARHGAP  | -0.077633624 | 4.09012677 | -1.320166165 | 0.187958 | 0.22726 | -6.47423634 |
| GLYATL2 | 0.025023796  | 0.09994049 | 1.319729271  | 0.188103 | 0.22742 | -6.47480898 |
| GRK7    | -0.010293774 | 0.05149934 | -1.319609556 | 0.188143 | 0.22745 | -6.47496586 |
| MYH7B   | -0.078412206 | 1.10503804 | -1.319243446 | 0.188265 | 0.22758 | -6.47544553 |
| DEGS1   | -0.105498123 | 7.15932785 | -1.318810812 | 0.18841  | 0.22774 | -6.4760122  |
| SHISA9  | 0.089678055  | 0.318361   | 1.318290655  | 0.188584 | 0.22793 | -6.47669326 |
| PPP1R14 | -0.107689225 | 1.32725922 | -1.316243661 | 0.189269 | 0.22874 | -6.47937089 |
| PNLIPRF | -0.007770667 | 0.02404701 | -1.316022271 | 0.189343 | 0.22882 | -6.47966024 |
| GJA9    | -0.012897993 | 0.06480666 | -1.315779747 | 0.189424 | 0.2289  | -6.47997716 |
| GALNT3  | 0.166651781  | 4.87351959 | 1.315266807  | 0.189596 | 0.22907 | -6.48064725 |
| HMGB2   | -0.111719936 | 6.08757169 | -1.315252137 | 0.189601 | 0.22907 | -6.48066641 |
| PCDHB6  | -0.066823983 | 0.67775648 | -1.31519675  | 0.18962  | 0.22907 | -6.48073875 |

|          |              |            |              |          |         |             |
|----------|--------------|------------|--------------|----------|---------|-------------|
| CCK      | -0.026593785 | 0.07317136 | -1.315169764 | 0.189629 | 0.22907 | -6.48077399 |
| PTPN23   | -0.080511305 | 5.40130104 | -1.315147866 | 0.189636 | 0.22907 | -6.48080259 |
| RBM19    | -0.073017476 | 4.09261102 | -1.315111759 | 0.189648 | 0.22907 | -6.48084975 |
| PLIN5    | -0.128979643 | 1.88840657 | -1.314570116 | 0.18983  | 0.22927 | -6.48155697 |
| PTPRM    | -0.147488108 | 6.0391139  | -1.314542644 | 0.189839 | 0.22927 | -6.48159284 |
| TAS2R31  | -0.043900021 | 0.40223493 | -1.314325058 | 0.189912 | 0.22934 | -6.48187685 |
| SMG1     | -0.116872689 | 3.45337782 | -1.313872036 | 0.190064 | 0.22951 | -6.48246803 |
| RAB3IL1  | 0.107910952  | 2.65336542 | 1.31351471   | 0.190185 | 0.22963 | -6.4829342  |
| DIRAS3   | 0.272068668  | 4.67630545 | 1.313492561  | 0.190192 | 0.22963 | -6.48296309 |
| NPIPB12  | 0.029712827  | 0.15516825 | 1.313332129  | 0.190246 | 0.22968 | -6.48317234 |
| RALGAP   | -0.097623495 | 4.43289336 | -1.313016125 | 0.190352 | 0.22979 | -6.48358443 |
| LMO4     | -0.107910274 | 5.18676722 | -1.312708085 | 0.190456 | 0.2299  | -6.48398604 |
| FBXO40   | 0.023241357  | 0.02215424 | 1.312528926  | 0.190516 | 0.22996 | -6.48421958 |
| PWP2     | -0.079053416 | 0.55657345 | -1.311738827 | 0.190782 | 0.23026 | -6.48524912 |
| SPOPL    | -0.115222788 | 3.56761673 | -1.311628114 | 0.19082  | 0.23029 | -6.48539334 |
| RPS10-N  | 0.022009428  | 0.10843355 | 1.311557857  | 0.190843 | 0.2303  | -6.48548485 |
| SREBF2   | -0.112240315 | 5.37477002 | -1.310474621 | 0.191209 | 0.23073 | -6.48689517 |
| LLGL2    | -0.073104152 | 4.74552906 | -1.310108891 | 0.191332 | 0.23086 | -6.48737108 |
| TRIM45   | -0.124016852 | 2.29993176 | -1.309728856 | 0.191461 | 0.231   | -6.48786546 |
| F13A1    | 0.191034022  | 3.51669282 | 1.30871997   | 0.191802 | 0.23139 | -6.48917721 |
| ENPP2    | 0.199939535  | 2.95990617 | 1.30805346   | 0.192027 | 0.23165 | -6.49004326 |
| POU2F1   | -0.073635005 | 2.68280177 | -1.308019755 | 0.192039 | 0.23165 | -6.49008705 |
| ESCO2    | 0.037511965  | 0.33386697 | 1.307591078  | 0.192184 | 0.2318  | -6.49064382 |
| EXOC7    | -0.09584185  | 4.59112537 | -1.307403091 | 0.192248 | 0.23186 | -6.49088792 |
| ELMO3    | -0.134373852 | 5.93884217 | -1.307265055 | 0.192295 | 0.2319  | -6.49106714 |
| RTL5     | -0.132134492 | 5.22641179 | -1.306549221 | 0.192537 | 0.23218 | -6.49199624 |
| KLRD1    | 0.058477393  | 0.36544998 | 1.306505475  | 0.192552 | 0.23218 | -6.492053   |
| C17orf64 | -0.023024837 | 0.12961128 | -1.306424566 | 0.19258  | 0.2322  | -6.49215798 |
| NAV2     | 0.169411598  | 4.90323603 | 1.306351687  | 0.192604 | 0.23221 | -6.49225254 |
| HNRNPL   | -0.08462692  | 6.95200747 | -1.305932392 | 0.192747 | 0.23237 | -6.49279644 |
| GALNT1   | -0.139060354 | 2.15370499 | -1.304673221 | 0.193175 | 0.23287 | -6.49442877 |
| RNASE7   | 0.037967937  | 0.17980053 | 1.303444691  | 0.193593 | 0.23334 | -6.49601989 |
| ZNF592   | -0.100271371 | 4.48049672 | -1.303430856 | 0.193598 | 0.23334 | -6.4960378  |
| ZNF281   | -0.101380215 | 3.10564789 | -1.303328554 | 0.193633 | 0.23337 | -6.49617023 |
| PRDM15   | -0.059923632 | 1.57778109 | -1.301912954 | 0.194115 | 0.23392 | -6.49800163 |
| KLK1     | 0.292562279  | 1.4328199  | 1.301911345  | 0.194116 | 0.23392 | -6.49800371 |
| ST3GAL4  | -0.134663914 | 3.29081602 | -1.301825984 | 0.194145 | 0.23394 | -6.49811408 |
| DLC1     | 0.147810424  | 4.2906121  | 1.301591723  | 0.194225 | 0.23401 | -6.49841694 |
| LRRC37   | -0.03455348  | 0.33278776 | -1.301579141 | 0.194229 | 0.23401 | -6.49843321 |
| HJURP    | 0.088607105  | 0.87136509 | 1.300712365  | 0.194526 | 0.23435 | -6.49955333 |

|          |              |            |              |          |         |             |
|----------|--------------|------------|--------------|----------|---------|-------------|
| GDA      | 0.012060749  | 0.02583101 | 1.300023667  | 0.194761 | 0.23461 | -6.5004428  |
| HIST2H2  | -0.051231235 | 0.23809507 | -1.299914188 | 0.194799 | 0.23464 | -6.50058415 |
| DCLRE1I  | -0.082663546 | 2.5952612  | -1.298911884 | 0.195142 | 0.23504 | -6.50187771 |
| CCDC74   | 0.135070048  | 2.99890755 | 1.298458639  | 0.195297 | 0.23521 | -6.50246233 |
| CDHR4    | -0.031847993 | 0.05979924 | -1.298371921 | 0.195327 | 0.23523 | -6.50257417 |
| TCP10L2  | -0.022140566 | 0.06831691 | -1.298224934 | 0.195377 | 0.23527 | -6.5027637  |
| MSL1     | -0.09201594  | 4.83593943 | -1.296876001 | 0.195841 | 0.23581 | -6.50450216 |
| KLHL25   | -0.081656432 | 2.11861269 | -1.296563576 | 0.195948 | 0.23592 | -6.50490454 |
| C1orf216 | -0.105107056 | 3.90963074 | -1.296437495 | 0.195991 | 0.23596 | -6.5050669  |
| NUP188   | 0.091001664  | 4.63509834 | 1.296313133  | 0.196034 | 0.23599 | -6.50522703 |
| NRXN3    | 0.081308715  | 0.40386779 | 1.296289781  | 0.196042 | 0.23599 | -6.5052571  |
| CEP83    | -0.080212299 | 2.78724943 | -1.295767584 | 0.196222 | 0.23619 | -6.5059293  |
| TRAK2    | 0.133036779  | 5.95981856 | 1.294896911  | 0.196521 | 0.23653 | -6.5070495  |
| LY75-CD  | 0.009795145  | 0.04726833 | 1.294660561  | 0.196603 | 0.23661 | -6.50735345 |
| RNASE4   | 0.086517965  | 1.10316854 | 1.294346953  | 0.196711 | 0.23673 | -6.50775668 |
| PKD2     | -0.120339435 | 4.15207169 | -1.293515532 | 0.196998 | 0.23705 | -6.50882524 |
| MATN1    | -0.113656364 | 0.31835795 | -1.293206114 | 0.197105 | 0.23717 | -6.50922273 |
| NUMA1    | -0.104500037 | 6.02139454 | -1.292690212 | 0.197283 | 0.23736 | -6.50988528 |
| MTBP     | 0.038923099  | 0.73842557 | 1.291061762  | 0.197846 | 0.23802 | -6.5119749  |
| SPINK2   | 0.164591151  | 2.60982213 | 1.289723572  | 0.19831  | 0.23857 | -6.51369011 |
| CT55     | -0.014009923 | 0.06739242 | -1.289165794 | 0.198503 | 0.23878 | -6.51440452 |
| RTP4     | 0.127441361  | 3.16646782 | 1.28895649   | 0.198576 | 0.23885 | -6.51467253 |
| DVL2     | -0.086417632 | 4.52751497 | -1.288749239 | 0.198648 | 0.23892 | -6.51493786 |
| CHN2     | -0.146410511 | 2.76312414 | -1.288082403 | 0.198879 | 0.23917 | -6.51579127 |
| ROBO1    | 0.122200312  | 2.46200043 | 1.288065555  | 0.198885 | 0.23917 | -6.51581283 |
| PLXDC2   | 0.117151372  | 3.90146913 | 1.287991824  | 0.198911 | 0.23919 | -6.51590716 |
| PMP22    | -0.168484345 | 5.76296845 | -1.287527592 | 0.199072 | 0.23936 | -6.51650099 |
| STYX     | -0.073505034 | 3.44568007 | -1.287448453 | 0.1991   | 0.23938 | -6.5166022  |
| SALL3    | -0.087330176 | 0.12475449 | -1.287197127 | 0.199187 | 0.23947 | -6.51692358 |
| KIR3DL2  | 0.033271715  | 0.1027762  | 1.286775304  | 0.199334 | 0.23963 | -6.51746284 |
| FOLH1    | -0.121248396 | 1.61068366 | -1.286737526 | 0.199347 | 0.23963 | -6.51751113 |
| CCL4     | 0.205033276  | 2.62307268 | 1.286332131  | 0.199488 | 0.23978 | -6.51802921 |
| TBX1     | -0.107661933 | 0.89500497 | -1.286255181 | 0.199515 | 0.23978 | -6.51812753 |
| SNX16    | 0.10173067   | 3.4738436  | 1.286251232  | 0.199516 | 0.23978 | -6.51813257 |
| ORC6     | 0.065787377  | 1.07665906 | 1.28609848   | 0.19957  | 0.23983 | -6.51832773 |
| NRIP3    | 0.108458079  | 1.45018395 | 1.285739588  | 0.199695 | 0.23996 | -6.51878616 |
| GOLGA6   | -0.034846755 | 0.28987194 | -1.285697339 | 0.199709 | 0.23996 | -6.51884012 |
| PARP9    | 0.120748089  | 4.48235166 | 1.285216821  | 0.199877 | 0.24014 | -6.5194537  |
| CD59     | -0.104921978 | 8.18279833 | -1.284469988 | 0.200138 | 0.24043 | -6.52040688 |
| NEFH     | -0.117471415 | 0.83104774 | -1.284443393 | 0.200147 | 0.24043 | -6.52044081 |

|         |              |            |              |          |         |             |
|---------|--------------|------------|--------------|----------|---------|-------------|
| NRGN    | -0.158314588 | 4.74341649 | -1.283904187 | 0.200335 | 0.24064 | -6.52112865 |
| FAM43B  | 0.101112397  | 0.88207283 | 1.28369604   | 0.200408 | 0.24071 | -6.5213941  |
| TMPPE   | 0.076383453  | 1.12180172 | 1.28302861   | 0.200641 | 0.24098 | -6.52224497 |
| PCDHA1  | 0.123667021  | 0.83088383 | 1.281297155  | 0.201248 | 0.24169 | -6.52445028 |
| PKHD1   | 0.025963879  | 0.04220838 | 1.280913682  | 0.201382 | 0.24183 | -6.5249383  |
| MAP1B   | -0.129050193 | 3.00562728 | -1.280825886 | 0.201413 | 0.24185 | -6.52505001 |
| MXN1    | -0.065805666 | 0.04846028 | -1.280324027 | 0.201589 | 0.24205 | -6.52568843 |
| S100A1  | 0.180266896  | 8.24563464 | 1.280223251  | 0.201624 | 0.24207 | -6.5258166  |
| RBM33   | -0.082434509 | 3.29872864 | -1.279291271 | 0.201952 | 0.24245 | -6.52700144 |
| C4orf51 | -0.028664576 | 0.09928818 | -1.279060328 | 0.202033 | 0.24253 | -6.52729491 |
| SCAF11  | -0.102785501 | 4.39187913 | -1.278249735 | 0.202318 | 0.24285 | -6.52832455 |
| ESRRB   | -0.047384358 | 0.1485916  | -1.277725916 | 0.202503 | 0.24305 | -6.52898958 |
| EIF3C   | -0.111342372 | 2.21215673 | -1.277703826 | 0.20251  | 0.24305 | -6.52901762 |
| SSH1    | 0.098336974  | 3.60580417 | 1.276793676  | 0.202831 | 0.24342 | -6.53017247 |
| PCP4    | -0.223184636 | 6.76981071 | -1.27633836  | 0.202992 | 0.24359 | -6.53074989 |
| ZNF736  | -0.086567741 | 2.37448328 | -1.276100045 | 0.203076 | 0.24368 | -6.53105204 |
| SLC6A7  | 0.016609964  | 0.07925396 | 1.276028372  | 0.203101 | 0.24369 | -6.5311429  |
| ERAP1   | 0.120983763  | 4.11160414 | 1.274446454  | 0.20366  | 0.24434 | -6.533147   |
| IMPG2   | 0.014366526  | 0.13440039 | 1.273265408  | 0.204078 | 0.24483 | -6.53464164 |
| SPATA2  | -0.100102549 | 1.74755491 | -1.273206907 | 0.204099 | 0.24483 | -6.53471564 |
| SPATC11 | -0.152615511 | 2.92373536 | -1.272829819 | 0.204232 | 0.24498 | -6.53519255 |
| ACTG1   | -0.081692589 | 11.9332689 | -1.272682593 | 0.204284 | 0.24502 | -6.53537871 |
| TLE4    | -0.132426784 | 2.02719447 | -1.272456733 | 0.204364 | 0.2451  | -6.53566425 |
| MCTP1   | 0.086118941  | 1.33134683 | 1.27221213   | 0.204451 | 0.24519 | -6.53597344 |
| ANKH    | 0.141968819  | 4.68679809 | 1.271605651  | 0.204666 | 0.24543 | -6.5367398  |
| GPR31   | 0.02409298   | 0.07659657 | 1.27132323   | 0.204767 | 0.24553 | -6.53709655 |
| VN1R1   | -0.085039112 | 1.44273154 | -1.270283962 | 0.205136 | 0.24596 | -6.53840866 |
| MFN1    | -0.086354319 | 4.05718426 | -1.270132299 | 0.20519  | 0.246   | -6.53860004 |
| LRP12   | 0.102752391  | 2.3630749  | 1.269662629  | 0.205357 | 0.24619 | -6.5391926  |
| UBAP2   | -0.095179194 | 3.41397853 | -1.26895946  | 0.205607 | 0.24647 | -6.54007934 |
| STAG1   | -0.140263595 | 3.35781483 | -1.268828532 | 0.205654 | 0.24651 | -6.5402444  |
| TPM4    | 0.101413256  | 5.95945892 | 1.267748431  | 0.206039 | 0.24695 | -6.5416054  |
| RNF208  | -0.11618335  | 5.35225221 | -1.267336037 | 0.206186 | 0.24711 | -6.54212474 |
| ZP3     | -0.122790312 | 1.8680253  | -1.26721071  | 0.206231 | 0.24715 | -6.54228253 |
| DERL3   | -0.231472017 | 3.77241364 | -1.2660267   | 0.206653 | 0.24764 | -6.54377252 |
| CDKN1C  | -0.119959547 | 3.57832924 | -1.265421783 | 0.20687  | 0.24788 | -6.54453324 |
| HNF1B   | 0.087283603  | 0.23828532 | 1.262951947  | 0.207755 | 0.24892 | -6.54763545 |
| ZDHHC1  | -0.094629433 | 4.70388346 | -1.262603473 | 0.20788  | 0.24905 | -6.54807266 |
| NOMO2   | -0.13264422  | 2.25096284 | -1.261596635 | 0.208241 | 0.24946 | -6.54933523 |
| VWA5B1  | -0.084829868 | 0.49436312 | -1.261577098 | 0.208248 | 0.24946 | -6.54935972 |

|        |              |            |              |          |         |             |
|--------|--------------|------------|--------------|----------|---------|-------------|
| TNK2   | -0.088102316 | 3.48066934 | -1.260867963 | 0.208503 | 0.24975 | -6.55024836 |
| MDN1   | -0.108179162 | 3.41424049 | -1.260226609 | 0.208734 | 0.25001 | -6.55105164 |
| HN4G   | 0.008719122  | 0.02185499 | 1.259524127  | 0.208987 | 0.25029 | -6.55193101 |
| WDR54  | -0.112001066 | 3.84182689 | -1.259448928 | 0.209014 | 0.25031 | -6.55202512 |
| AQP2   | -0.039201019 | 0.13804262 | -1.258515041 | 0.209351 | 0.25069 | -6.55319335 |
| LZTS3  | -0.093860563 | 4.67387465 | -1.257032922 | 0.209886 | 0.25132 | -6.55504562 |
| PTPN5  | 0.055917649  | 0.44419225 | 1.255973632  | 0.21027  | 0.25176 | -6.55636814 |
| TRIM72 | 0.025697479  | 0.06228528 | 1.255895081  | 0.210298 | 0.25177 | -6.55646617 |
| CSK    | -0.07558516  | 5.15109942 | -1.255180371 | 0.210557 | 0.25206 | -6.55735781 |
| DENND1 | -0.079234682 | 2.63068892 | -1.255137695 | 0.210572 | 0.25207 | -6.55741103 |
| ZNF750 | -0.271863022 | 3.39814738 | -1.254492528 | 0.210806 | 0.25233 | -6.55821546 |
| SUSD2  | -0.21318218  | 4.24263388 | -1.254264923 | 0.210889 | 0.25241 | -6.55849915 |
| RNASEH | -0.090105984 | 3.29798251 | -1.254153862 | 0.210929 | 0.25243 | -6.55863756 |
| TECPR2 | -0.081044518 | 3.80504358 | -1.254129501 | 0.210938 | 0.25243 | -6.55866791 |
| KCNAB3 | -0.068525886 | 0.67910144 | -1.253389993 | 0.211206 | 0.25274 | -6.5595892  |
| DSCAML | -0.127047778 | 1.04905687 | -1.252848936 | 0.211403 | 0.25294 | -6.56026291 |
| KCNA5  | -0.115497111 | 1.21255349 | -1.252844502 | 0.211404 | 0.25294 | -6.56026843 |
| SPTSSB | 0.041094241  | 0.26090233 | 1.252707294  | 0.211454 | 0.25298 | -6.56043923 |
| SKA3   | 0.068825287  | 0.79565973 | 1.252427311  | 0.211556 | 0.25308 | -6.56078771 |
| PAOX   | -0.12001225  | 3.64252833 | -1.252277936 | 0.21161  | 0.25313 | -6.5609736  |
| ANXA11 | -0.06775364  | 6.07974762 | -1.252217033 | 0.211633 | 0.25314 | -6.56104938 |
| HOXA7  | 0.032207624  | 0.09403773 | 1.252074906  | 0.211684 | 0.25318 | -6.56122622 |
| MLANA  | -0.030467816 | 0.39467786 | -1.251068945 | 0.21205  | 0.2536  | -6.56247729 |
| ISLR   | 0.204486827  | 7.33607836 | 1.250306291  | 0.212328 | 0.25392 | -6.56342511 |
| ABCA10 | -0.053098468 | 0.49976064 | -1.250200068 | 0.212367 | 0.25395 | -6.56355708 |
| NRM    | -0.095432944 | 4.11413667 | -1.248995605 | 0.212807 | 0.25445 | -6.56505269 |
| ADTRP  | 0.202310804  | 1.92075841 | 1.248723993  | 0.212906 | 0.25455 | -6.56538976 |
| KL     | 0.141385501  | 2.25171707 | 1.248551931  | 0.212969 | 0.25461 | -6.56560325 |
| TNFRSF | 0.101734506  | 6.79991015 | 1.248437742  | 0.21301  | 0.25464 | -6.56574492 |
| NFIB   | -0.108667683 | 4.74144862 | -1.248157708 | 0.213113 | 0.25475 | -6.56609228 |
| C1QTNF | 0.124012902  | 1.41009973 | 1.247637165  | 0.213303 | 0.25496 | -6.56673778 |
| FGL1   | 0.018514965  | 0.07336359 | 1.24745731   | 0.213369 | 0.25502 | -6.56696075 |
| PCDHB7 | -0.077335891 | 0.84074516 | -1.247332775 | 0.213414 | 0.25505 | -6.56711512 |
| ZDHHC1 | -0.069303109 | 4.9245332  | -1.246867787 | 0.213585 | 0.25524 | -6.56769137 |
| BEST4  | -0.110671743 | 1.53431265 | -1.246212463 | 0.213825 | 0.25551 | -6.56850313 |
| UBL4B  | 0.017691159  | 0.06111768 | 1.244247506  | 0.214545 | 0.25635 | -6.57093464 |
| GNPDA1 | -0.073791861 | 5.85592505 | -1.244173204 | 0.214573 | 0.25637 | -6.57102651 |
| LRRN1  | -0.169399419 | 3.27044112 | -1.243563395 | 0.214797 | 0.25662 | -6.57178029 |
| SSX1   | 0.250036172  | 2.69937638 | 1.243235075  | 0.214918 | 0.25674 | -6.57218597 |
| TDRD12 | 0.082545421  | 0.20403128 | 1.242698906  | 0.215115 | 0.25696 | -6.57284826 |

|         |              |            |              |          |         |             |
|---------|--------------|------------|--------------|----------|---------|-------------|
| WSCD1   | -0.075572911 | 1.38285142 | -1.242614427 | 0.215146 | 0.25698 | -6.57295258 |
| ATOH8   | -0.162730576 | 5.24075373 | -1.24257439  | 0.215161 | 0.25698 | -6.57300202 |
| THOC2   | -0.087707621 | 4.02851981 | -1.242200284 | 0.215298 | 0.25712 | -6.57346391 |
| FAM160A | 0.129449836  | 2.94621893 | 1.240341346  | 0.215984 | 0.25792 | -6.575757   |
| ODAPH   | 0.019059252  | 0.09375884 | 1.240082643  | 0.216079 | 0.25802 | -6.57607585 |
| NPIPB11 | 0.070889124  | 0.4603172  | 1.239737918  | 0.216207 | 0.25815 | -6.57650062 |
| JMJD1C  | -0.114260733 | 4.05441056 | -1.239517201 | 0.216288 | 0.25822 | -6.57677253 |
| GINS4   | -0.067771298 | 1.15602432 | -1.239498523 | 0.216295 | 0.25822 | -6.57679554 |
| WDR76   | 0.099056298  | 2.21537085 | 1.239476244  | 0.216303 | 0.25822 | -6.57682298 |
| KANK1   | 0.125286662  | 4.1013876  | 1.238779185  | 0.216561 | 0.2585  | -6.57768137 |
| ATXN2L  | 0.088463453  | 5.54968683 | 1.238586734  | 0.216632 | 0.25856 | -6.57791828 |
| PICALM  | -0.085176451 | 6.15981704 | -1.238559854 | 0.216642 | 0.25856 | -6.57795137 |
| ACR     | -0.043941605 | 0.53595192 | -1.238401528 | 0.216701 | 0.25862 | -6.57814624 |
| PAQR3   | -0.071958467 | 1.6859064  | -1.23743971  | 0.217057 | 0.25902 | -6.57932952 |
| CDC7    | -0.078948794 | 1.89636967 | -1.237207064 | 0.217143 | 0.25911 | -6.5796156  |
| CHTF18  | 0.093278214  | 2.51960167 | 1.236006627  | 0.217588 | 0.25962 | -6.5810909  |
| GLP1R   | -0.15590844  | 0.80935394 | -1.235557716 | 0.217755 | 0.2598  | -6.58164223 |
| NPAS1   | 0.093768045  | 1.2603605  | 1.235384131  | 0.217819 | 0.25986 | -6.58185537 |
| SMIM14  | -0.110108629 | 6.25789073 | -1.235135528 | 0.217911 | 0.25995 | -6.58216057 |
| MTHFR   | -0.093222202 | 4.80836305 | -1.234888283 | 0.218003 | 0.26004 | -6.58246403 |
| FAM102E | 0.115418064  | 2.58465336 | 1.233858809  | 0.218386 | 0.26048 | -6.58372697 |
| CTAGE1  | -0.006615868 | 0.01443707 | -1.233736216 | 0.218432 | 0.26052 | -6.58387729 |
| ADAM11  | -0.063149846 | 0.45030475 | -1.232241023 | 0.218989 | 0.26116 | -6.58570952 |
| TRIM35  | -0.076235987 | 3.92871581 | -1.231784957 | 0.219159 | 0.26135 | -6.58626796 |
| BTAF1   | 0.127089586  | 3.75736442 | 1.231178832  | 0.219385 | 0.2616  | -6.58700981 |
| ORC1    | 0.068887188  | 1.08600745 | 1.230748432  | 0.219546 | 0.26177 | -6.58753638 |
| LHX4    | -0.050704155 | 0.51079265 | -1.230449863 | 0.219657 | 0.26189 | -6.58790155 |
| CYP19A1 | -0.037007896 | 0.11753759 | -1.230161639 | 0.219765 | 0.262   | -6.58825398 |
| KIF21A  | -0.111374425 | 2.75328432 | -1.22961625  | 0.219969 | 0.26222 | -6.58892065 |
| AP1G2   | -0.109829011 | 3.67470945 | -1.229547121 | 0.219995 | 0.26223 | -6.58900513 |
| HIST1H3 | -0.046424566 | 0.24850795 | -1.229391712 | 0.220053 | 0.26228 | -6.58919503 |
| SHPRH   | -0.092559302 | 1.38488539 | -1.228344346 | 0.220445 | 0.26273 | -6.59047425 |
| GLIS2   | 0.097840316  | 4.84511827 | 1.22791715   | 0.220605 | 0.26291 | -6.5909957  |
| SEZ6    | -0.009784623 | 0.05073146 | -1.227101066 | 0.220911 | 0.26325 | -6.59199135 |
| CTDSP2  | -0.097457776 | 6.52322364 | -1.226199365 | 0.221249 | 0.26364 | -6.5930907  |
| IL20RA  | -0.082992638 | 0.74553204 | -1.226145674 | 0.22127  | 0.26364 | -6.59315613 |
| EEF1A2  | -0.269513516 | 2.01517469 | -1.225890005 | 0.221366 | 0.26374 | -6.59346768 |
| ASH1L   | -0.130329331 | 4.2599139  | -1.225690275 | 0.221441 | 0.26381 | -6.59371102 |
| FPGS    | -0.07880403  | 5.64683407 | -1.225503933 | 0.221511 | 0.26387 | -6.59393802 |
| PACSIN1 | -0.090495015 | 1.02320761 | -1.225479478 | 0.22152  | 0.26387 | -6.5939678  |



|          |              |            |              |          |         |             |
|----------|--------------|------------|--------------|----------|---------|-------------|
| TAS2R15  | -0.037995883 | 0.41920189 | -1.225414444 | 0.221544 | 0.26388 | -6.59404702 |
| CLDN15   | -0.083992627 | 2.76034847 | -1.224839473 | 0.221761 | 0.26412 | -6.59474715 |
| SGO1     | 0.044675191  | 0.49512931 | 1.223571628  | 0.222238 | 0.26467 | -6.59628985 |
| RP2      | -0.100304374 | 3.53547479 | -1.223275314 | 0.22235  | 0.26478 | -6.59665018 |
| TMEM25   | -0.075403767 | 0.33063548 | -1.223087527 | 0.22242  | 0.26485 | -6.59687848 |
| DPYSL2   | -0.112837615 | 4.32002844 | -1.222403724 | 0.222678 | 0.26513 | -6.59770955 |
| SLFN1    | -0.025890803 | 0.2263513  | -1.221640221 | 0.222967 | 0.26546 | -6.59863693 |
| DAB1     | 0.021400752  | 0.09666154 | 1.220674645  | 0.223331 | 0.26588 | -6.59980894 |
| SPATA9   | 0.065198627  | 1.04234507 | 1.220328142  | 0.223462 | 0.26601 | -6.6002293  |
| HOXA10   | 0.049910681  | 0.15815139 | 1.220066791  | 0.223561 | 0.26611 | -6.60054628 |
| KRT7     | 0.1452889    | 9.53748686 | 1.219367494  | 0.223826 | 0.26641 | -6.60139409 |
| FBXW12   | 0.02378362   | 0.19543246 | 1.219043995  | 0.223949 | 0.26654 | -6.60178613 |
| OTOA     | -0.028925649 | 0.13831577 | -1.218999532 | 0.223965 | 0.26654 | -6.60184001 |
| THSD7A   | -0.12582806  | 1.56432068 | -1.218824036 | 0.224032 | 0.2666  | -6.60205264 |
| C17orf98 | -0.043805328 | 0.22100447 | -1.218466591 | 0.224167 | 0.26674 | -6.60248562 |
| PLEKHA7  | -0.137819185 | 3.02124474 | -1.217596963 | 0.224497 | 0.26711 | -6.6035385  |
| TMEM27   | 0.096915442  | 2.25774328 | 1.217461401  | 0.224549 | 0.26716 | -6.60370256 |
| SMTNL1   | 0.084268528  | 0.57892073 | 1.217410718  | 0.224568 | 0.26716 | -6.60376389 |
| IGFBP4   | -0.106776409 | 9.89374107 | -1.217221883 | 0.22464  | 0.26723 | -6.60399239 |
| CYP4A22  | 0.008744479  | 0.02689741 | 1.215983814  | 0.22511  | 0.26777 | -6.60548961 |
| RRAGD    | -0.159981573 | 4.97151432 | -1.215039301 | 0.22547  | 0.26818 | -6.60663081 |
| OPN3     | 0.126709102  | 2.67643004 | 1.214964617  | 0.225498 | 0.26819 | -6.60672101 |
| PAPSS1   | 0.105065325  | 5.81753335 | 1.214545571  | 0.225658 | 0.26836 | -6.60722701 |
| NUP58    | -0.092522565 | 3.51479719 | -1.214296532 | 0.225752 | 0.26846 | -6.60752764 |
| RFWD3    | -0.081199019 | 3.58249083 | -1.214017364 | 0.225859 | 0.26856 | -6.60786457 |
| SPATS2L  | 0.124947337  | 5.18537013 | 1.213830207  | 0.22593  | 0.26863 | -6.60809041 |
| BRSK1    | -0.15824501  | 1.44126724 | -1.213545162 | 0.226039 | 0.26874 | -6.60843431 |
| AP5B1    | 0.091397691  | 3.86965647 | 1.213140044  | 0.226194 | 0.26891 | -6.60892293 |
| GRIP1    | -0.125984342 | 1.84617745 | -1.212901381 | 0.226285 | 0.26899 | -6.60921071 |
| TLR9     | 0.011841853  | 0.06602521 | 1.212252713  | 0.226532 | 0.26926 | -6.60999259 |
| NPTX1    | 0.066647799  | 0.18303199 | 1.212225953  | 0.226543 | 0.26926 | -6.61002483 |
| ASCL4    | 0.012050226  | 0.04367442 | 1.211427258  | 0.226848 | 0.26961 | -6.61098696 |
| ERVV-1   | 0.074374732  | 0.21155356 | 1.210695397  | 0.227128 | 0.26992 | -6.61186803 |
| POU6F2   | -0.017719696 | 0.04966131 | -1.209937984 | 0.227418 | 0.27025 | -6.61277931 |
| USP13    | -0.098149053 | 4.18157802 | -1.209701619 | 0.227508 | 0.27034 | -6.61306357 |
| CLDN34   | -0.019160328 | 0.10708607 | -1.205675492 | 0.229055 | 0.27215 | -6.61789717 |
| NBPF9    | 0.105592346  | 2.26924029 | 1.205515743  | 0.229116 | 0.27221 | -6.61808863 |
| HNRNPF   | -0.08736399  | 7.24592078 | -1.205308143 | 0.229196 | 0.27228 | -6.6183374  |
| HAL      | -0.015167042 | 0.12854902 | -1.205046889 | 0.229297 | 0.27238 | -6.61865041 |
| SLC28A1  | -0.021468083 | 0.10574462 | -1.204607771 | 0.229466 | 0.27257 | -6.61917636 |

|         |              |            |              |          |         |             |
|---------|--------------|------------|--------------|----------|---------|-------------|
| TRIM33  | -0.085571644 | 4.10073532 | -1.204177513 | 0.229632 | 0.27274 | -6.61969152 |
| CHODL   | -0.056984264 | 0.62766509 | -1.203798285 | 0.229779 | 0.2729  | -6.62014543 |
| SMCHD1  | 0.095141072  | 3.47690797 | 1.203683656  | 0.229823 | 0.27293 | -6.6202826  |
| AQP8    | 0.070421287  | 0.32255044 | 1.20364271   | 0.229839 | 0.27293 | -6.6203316  |
| RFTN1   | -0.11872559  | 5.88987136 | -1.203352686 | 0.229951 | 0.27303 | -6.62067859 |
| TP53BP2 | 0.121407756  | 5.44006005 | 1.203340573  | 0.229955 | 0.27303 | -6.62069308 |
| PCDH15  | 0.007935077  | 0.01799859 | 1.20246513   | 0.230293 | 0.27342 | -6.62173999 |
| EIF3CL  | -0.027438361 | 0.36141013 | -1.202287682 | 0.230362 | 0.27348 | -6.6219521  |
| ERN1    | -0.113666237 | 3.21958061 | -1.202043548 | 0.230456 | 0.27357 | -6.62224387 |
| PLA2G4E | -0.061034059 | 0.49238599 | -1.202000998 | 0.230473 | 0.27357 | -6.62229471 |
| SORCS2  | 0.233455368  | 3.61538154 | 1.201413139  | 0.2307   | 0.27382 | -6.62299702 |
| CCDC16  | -0.027575482 | 0.23446773 | -1.201009922 | 0.230856 | 0.27399 | -6.62347854 |
| PNISR   | -0.122167621 | 5.01703293 | -1.200689872 | 0.23098  | 0.27412 | -6.62386062 |
| CHD6    | -0.106660126 | 3.96866339 | -1.199717292 | 0.231357 | 0.27454 | -6.62502111 |
| PPEF2   | 0.006865757  | 0.0184173  | 1.199171886  | 0.231569 | 0.27478 | -6.62567148 |
| RHPN1   | -0.105763489 | 5.51348775 | -1.199108748 | 0.231593 | 0.27479 | -6.62574675 |
| AMZ1    | -0.034288857 | 0.20099553 | -1.198313592 | 0.231902 | 0.27513 | -6.62669437 |
| NLRP7   | 0.032460826  | 0.12672217 | 1.197944091  | 0.232046 | 0.27528 | -6.6271345  |
| DDX21   | -0.116953605 | 4.96118387 | -1.197267885 | 0.232309 | 0.27558 | -6.62793963 |
| SEMA4D  | -0.097463491 | 3.16809892 | -1.196820644 | 0.232483 | 0.27576 | -6.62847189 |
| MRPL14  | -0.102603792 | 7.03688065 | -1.196120046 | 0.232755 | 0.27605 | -6.62930527 |
| PLBD2   | 0.080696718  | 5.693817   | 1.196108133  | 0.23276  | 0.27605 | -6.62931944 |
| CRTC1   | -0.112416514 | 4.57111185 | -1.195941101 | 0.232825 | 0.27611 | -6.62951805 |
| TIGD3   | -0.041052325 | 0.67027656 | -1.195300627 | 0.233075 | 0.27639 | -6.63027938 |
| YY2     | 0.062253208  | 1.00155607 | 1.19508309   | 0.23316  | 0.27647 | -6.63053788 |
| CD2AP   | -0.090498839 | 4.67710722 | -1.194938285 | 0.233216 | 0.27652 | -6.63070992 |
| ARL13A  | -0.043069965 | 0.45607898 | -1.194034539 | 0.233569 | 0.27692 | -6.63178319 |
| SPRED2  | -0.111716568 | 5.15673158 | -1.193809335 | 0.233657 | 0.277   | -6.63205051 |
| NUSAP1  | 0.123006467  | 2.43750605 | 1.193212231  | 0.23389  | 0.27726 | -6.63275905 |
| IRX5    | -0.053881351 | 0.37669155 | -1.193036856 | 0.233959 | 0.27732 | -6.63296709 |
| OLFM1   | -0.10993493  | 1.50108084 | -1.192695489 | 0.234092 | 0.27746 | -6.63337194 |
| LEF1    | -0.154483587 | 2.98767981 | -1.192366433 | 0.234221 | 0.27759 | -6.63376209 |
| NACC2   | -0.08014695  | 3.9646131  | -1.191904989 | 0.234401 | 0.27779 | -6.63430903 |
| APOBEC  | -0.097865817 | 5.67603751 | -1.190779762 | 0.234842 | 0.27829 | -6.63564185 |
| SMIM2   | -0.03917628  | 0.2771805  | -1.190656343 | 0.23489  | 0.27833 | -6.63578796 |
| SLC12A6 | -0.102734257 | 3.44431388 | -1.190286464 | 0.235035 | 0.27848 | -6.63622576 |
| SEZ6L   | 0.072314528  | 0.23532325 | 1.189830899  | 0.235214 | 0.27867 | -6.6367648  |
| PRNP    | -0.121329352 | 7.60052031 | -1.189489563 | 0.235348 | 0.27881 | -6.63716855 |
| AARD    | -0.067639221 | 0.41109497 | -1.187984808 | 0.235939 | 0.27949 | -6.63894706 |
| NPAS2   | 0.086747541  | 1.55716847 | 1.187819675  | 0.236004 | 0.27955 | -6.6391421  |

|         |              |            |              |          |         |             |
|---------|--------------|------------|--------------|----------|---------|-------------|
| CPLX2   | -0.085402001 | 0.14652198 | -1.186862247 | 0.236381 | 0.27998 | -6.6402724  |
| UNC93B  | 0.101081747  | 4.99201061 | 1.186447878  | 0.236544 | 0.28015 | -6.6407613  |
| KHDC3L  | -0.021903643 | 0.08853206 | -1.185729627 | 0.236828 | 0.28047 | -6.64160835 |
| PHKA2   | -0.081221176 | 3.66940941 | -1.185481832 | 0.236925 | 0.28056 | -6.64190047 |
| ARHGDII | -0.12179353  | 8.06715416 | -1.185335918 | 0.236983 | 0.28061 | -6.64207245 |
| CA9     | -0.101523595 | 0.34513267 | -1.1845224   | 0.237304 | 0.28097 | -6.64303092 |
| C1RL    | 0.105452747  | 4.48726999 | 1.184428215  | 0.237341 | 0.281   | -6.64314185 |
| MCM8    | -0.063447707 | 1.76104078 | -1.184197165 | 0.237432 | 0.28108 | -6.64341393 |
| GSTA1   | -0.125606902 | 0.47769283 | -1.183865259 | 0.237564 | 0.28122 | -6.64380468 |
| TAS2R13 | 0.010202224  | 0.04319814 | 1.183466013  | 0.237721 | 0.28137 | -6.64427457 |
| ETV5    | -0.144939901 | 5.38302419 | -1.183456953 | 0.237725 | 0.28137 | -6.64428523 |
| CHD9    | -0.099159508 | 3.49109075 | -1.182552386 | 0.238083 | 0.28178 | -6.64534926 |
| MAP2K7  | -0.068704362 | 4.74536039 | -1.182506754 | 0.238101 | 0.28178 | -6.64540292 |
| CEMIP2  | 0.111739254  | 3.69185073 | 1.182405939  | 0.238141 | 0.2818  | -6.64552145 |
| WNT10B  | 0.070256308  | 0.49662313 | 1.181944217  | 0.238324 | 0.28198 | -6.64606419 |
| KIF18B  | 0.069524208  | 0.71823827 | 1.181937688  | 0.238326 | 0.28198 | -6.64607187 |
| ALPK3   | -0.106850076 | 2.41615542 | -1.181594095 | 0.238462 | 0.28213 | -6.64647562 |
| RGS7BP  | -0.050082742 | 0.20682308 | -1.181146295 | 0.23864  | 0.28232 | -6.64700164 |
| ANXA8L1 | -0.043379201 | 0.19642495 | -1.1810539   | 0.238676 | 0.28234 | -6.64711015 |
| ATRX    | -0.098291721 | 3.71676812 | -1.180822546 | 0.238768 | 0.28243 | -6.64738182 |
| PRSS45I | -0.121750769 | 1.51157621 | -1.180723566 | 0.238807 | 0.28246 | -6.64749803 |
| SLC23A1 | -0.03427644  | 0.34613623 | -1.180509116 | 0.238893 | 0.28254 | -6.64774978 |
| ZNF454  | -0.084784736 | 1.72110101 | -1.179949271 | 0.239115 | 0.28278 | -6.6484068  |
| SEMA4B  | -0.107841775 | 5.61538965 | -1.179731504 | 0.239201 | 0.28286 | -6.64866227 |
| GNA13   | -0.094884391 | 4.85227139 | -1.179637044 | 0.239239 | 0.28289 | -6.64877308 |
| RIPPLY2 | -0.031720097 | 0.15946569 | -1.179573093 | 0.239264 | 0.2829  | -6.64884809 |
| PCDHB9  | -0.073242643 | 0.62567054 | -1.179101148 | 0.239452 | 0.28309 | -6.64940153 |
| ZC2HC1  | -0.124859019 | 4.36306963 | -1.179069524 | 0.239464 | 0.28309 | -6.64943861 |
| PTTG2   | -0.026502513 | 0.17967769 | -1.178748727 | 0.239592 | 0.28323 | -6.64981467 |
| PLGLB2  | -0.011997969 | 0.06444508 | -1.178577069 | 0.23966  | 0.28329 | -6.65001585 |
| DEPDC7  | 0.053560559  | 0.59281261 | 1.178358297  | 0.239747 | 0.28337 | -6.65027222 |
| ERBB2   | -0.118822363 | 6.39960293 | -1.177491245 | 0.240092 | 0.28376 | -6.65128779 |
| GRIN2D  | -0.074049334 | 1.01287336 | -1.177147572 | 0.240229 | 0.2839  | -6.65169013 |
| BTG3    | 0.090232059  | 5.82521947 | 1.17590899   | 0.240723 | 0.28446 | -6.65313917 |
| AMIGO3  | -0.010216378 | 0.05789613 | -1.175468799 | 0.240898 | 0.28465 | -6.6536538  |
| MAST2   | 0.075396546  | 4.35234178 | 1.174910695  | 0.241121 | 0.28489 | -6.654306   |
| TTYH3   | -0.106790123 | 4.8125892  | -1.174739522 | 0.24119  | 0.28496 | -6.65450597 |
| TANK    | -0.094401642 | 4.87211868 | -1.174684139 | 0.241212 | 0.28496 | -6.65457067 |
| ELK4    | 0.083342558  | 3.3318635  | 1.174338512  | 0.24135  | 0.2851  | -6.65497434 |
| KLHL29  | -0.060354768 | 0.73172019 | -1.173964575 | 0.241499 | 0.28526 | -6.65541094 |

|         |              |            |              |          |         |             |
|---------|--------------|------------|--------------|----------|---------|-------------|
| ATP13A4 | 0.170273276  | 5.66479963 | 1.172897162  | 0.241926 | 0.28575 | -6.65665648 |
| C6orf58 | -0.041040282 | 0.55175599 | -1.172317625 | 0.242158 | 0.286   | -6.65733226 |
| SLC9A3  | -0.083617584 | 0.80267344 | -1.172038533 | 0.24227  | 0.28611 | -6.65765758 |
| PTPRT   | -0.07249647  | 0.13668456 | -1.170072134 | 0.243059 | 0.28702 | -6.65994752 |
| POM121  | -0.10882728  | 3.09775819 | -1.170017771 | 0.243081 | 0.28703 | -6.66001078 |
| SLC39A1 | -0.064221683 | 5.18954541 | -1.168939967 | 0.243514 | 0.28752 | -6.66126425 |
| KNG1    | -0.02511605  | 0.10148431 | -1.168795195 | 0.243572 | 0.28757 | -6.66143253 |
| ARMH1   | -0.071507143 | 0.96265231 | -1.168640753 | 0.243635 | 0.28762 | -6.66161203 |
| TMEM15  | 0.045151118  | 0.25815889 | 1.168468494  | 0.243704 | 0.28769 | -6.6618122  |
| EPHA7   | -0.03160228  | 0.06209415 | -1.167922477 | 0.243924 | 0.28791 | -6.66244652 |
| CTNNAL  | -0.128033525 | 7.02485719 | -1.167900792 | 0.243932 | 0.28791 | -6.66247171 |
| ZNF471  | -0.082955178 | 2.65810953 | -1.167690654 | 0.244017 | 0.28799 | -6.66271575 |
| TRMT11  | -0.092354996 | 4.22779614 | -1.166620161 | 0.244448 | 0.28848 | -6.66395827 |
| SLN     | 0.092836477  | 0.21825971 | 1.165235235  | 0.245007 | 0.28912 | -6.66556408 |
| PHF3    | -0.102280715 | 4.85166164 | -1.165091924 | 0.245065 | 0.28916 | -6.66573014 |
| PDIA2   | 0.030821663  | 0.15492567 | 1.165067313  | 0.245075 | 0.28916 | -6.66575866 |
| GZMM    | 0.156220948  | 1.81791396 | 1.165031325  | 0.24509  | 0.28916 | -6.66580036 |
| SCN7A   | 0.07056093   | 0.31562669 | 1.164759092  | 0.2452   | 0.28927 | -6.66611573 |
| FAM193E | -0.096741167 | 3.88586374 | -1.164603041 | 0.245263 | 0.28932 | -6.66629648 |
| CYP2J2  | -0.061603474 | 0.7402846  | -1.164155216 | 0.245444 | 0.28952 | -6.66681505 |
| LPAR3   | 0.079101409  | 0.35769058 | 1.163843448  | 0.24557  | 0.28965 | -6.66717595 |
| KRT31   | -0.018495971 | 0.0677346  | -1.163683788 | 0.245635 | 0.2897  | -6.66736073 |
| C9orf50 | -0.106065937 | 1.09134328 | -1.163624709 | 0.245659 | 0.2897  | -6.6674291  |
| TTLL4   | -0.057727519 | 2.15686765 | -1.163596749 | 0.24567  | 0.2897  | -6.66746146 |
| IRF6    | -0.093463186 | 5.5566504  | -1.163024723 | 0.245901 | 0.28996 | -6.66812325 |
| RTN4R   | 0.12279071   | 3.58501912 | 1.162770813  | 0.246004 | 0.29006 | -6.6684169  |
| GABRP   | 0.02823827   | 0.20587455 | 1.162292604  | 0.246198 | 0.29027 | -6.66896978 |
| LRBA    | -0.103555445 | 4.57023207 | -1.162092967 | 0.246279 | 0.29034 | -6.66920052 |
| VPS13A  | -0.085118772 | 2.64504956 | -1.161597079 | 0.24648  | 0.29056 | -6.66977351 |
| KRT5    | 0.170487164  | 0.76371807 | 1.161469863  | 0.246532 | 0.2906  | -6.66992046 |
| GPR20   | -0.061514473 | 0.47276164 | -1.159952083 | 0.247148 | 0.2913  | -6.67167253 |
| THOC5   | 0.083244829  | 3.31718532 | 1.159169892  | 0.247466 | 0.29166 | -6.67257457 |
| VWDE    | 0.131390825  | 1.83527964 | 1.158541961  | 0.247722 | 0.29194 | -6.67329828 |
| NNAT    | 0.079654541  | 0.74961998 | 1.158207877  | 0.247858 | 0.29208 | -6.67368317 |
| YPEL1   | 0.082810247  | 1.74946588 | 1.158083175  | 0.247908 | 0.29211 | -6.6738268  |
| ANKRD4  | 0.084513933  | 1.72081133 | 1.1580682    | 0.247915 | 0.29211 | -6.67384405 |
| SMC5    | -0.099479497 | 4.20852415 | -1.157668594 | 0.248077 | 0.29226 | -6.67430422 |
| SKAP2   | 0.104616953  | 3.38199374 | 1.157656715  | 0.248082 | 0.29226 | -6.6743179  |
| JUP     | -0.097768216 | 7.79445385 | -1.157250738 | 0.248248 | 0.29243 | -6.67478524 |
| KLF10   | -0.125117347 | 5.30481566 | -1.157217553 | 0.248261 | 0.29243 | -6.67482343 |

|         |              |            |              |          |         |             |
|---------|--------------|------------|--------------|----------|---------|-------------|
| NOMO3   | -0.099119247 | 1.1290272  | -1.157153899 | 0.248287 | 0.29244 | -6.67489669 |
| ARHGEF  | 0.102392208  | 3.06408946 | 1.155539108  | 0.248946 | 0.29318 | -6.67675381 |
| PTPN1   | -0.081909711 | 4.99011922 | -1.155529242 | 0.24895  | 0.29318 | -6.67676514 |
| SLC2A6  | 0.087783969  | 1.70037931 | 1.155401311  | 0.249002 | 0.29323 | -6.67691216 |
| GRID2   | -0.013737764 | 0.02762063 | -1.154983635 | 0.249173 | 0.29341 | -6.67739204 |
| B4GALN  | -0.053453714 | 0.55478118 | -1.154250594 | 0.249473 | 0.29374 | -6.67823384 |
| GUCY1B  | 0.116126432  | 3.57561233 | 1.154136773  | 0.249519 | 0.29377 | -6.6783645  |
| ITPR1D  | 0.006894333  | 0.01447915 | 1.153906073  | 0.249614 | 0.29386 | -6.67862929 |
| TP53TG  | -0.019346549 | 0.07974766 | -1.153847045 | 0.249638 | 0.29387 | -6.67869703 |
| C2CD4C  | 0.196755877  | 2.38113835 | 1.153222177  | 0.249894 | 0.29415 | -6.67941394 |
| GZMH    | 0.178772315  | 2.49300148 | 1.152749412  | 0.250088 | 0.29436 | -6.67995609 |
| WDR87   | -0.052409843 | 0.2331532  | -1.151792197 | 0.25048  | 0.2948  | -6.68105311 |
| MTRNR2  | 0.03460722   | 0.22963205 | 1.151080199  | 0.250772 | 0.29513 | -6.68186851 |
| SLC25A3 | -0.008761328 | 0.03801588 | -1.150761117 | 0.250903 | 0.29526 | -6.68223377 |
| CRYBA4  | -0.053826226 | 0.25599905 | -1.150698384 | 0.250929 | 0.29527 | -6.68230557 |
| NOS2    | -0.088833232 | 1.01540078 | -1.150552717 | 0.250989 | 0.29532 | -6.68247228 |
| PAK2    | 0.075728899  | 5.36205339 | 1.150154355  | 0.251153 | 0.29549 | -6.68292807 |
| DCDC2B  | -0.055651079 | 0.61168238 | -1.149367932 | 0.251476 | 0.29585 | -6.68382741 |
| OR51B5  | -0.016747843 | 0.12798361 | -1.148995358 | 0.251629 | 0.29601 | -6.68425326 |
| MAPK1   | -0.110467279 | 5.50616981 | -1.148406467 | 0.251872 | 0.29627 | -6.68492609 |
| VDR     | 0.1141915    | 3.20235933 | 1.148335839  | 0.251901 | 0.29627 | -6.68500677 |
| ACVR1C  | 0.046962436  | 0.45988673 | 1.148333741  | 0.251902 | 0.29627 | -6.68500916 |
| CXXC5   | -0.092083998 | 6.30329909 | -1.148024592 | 0.252029 | 0.2964  | -6.68536222 |
| EPS8L1  | -0.116385107 | 5.172106   | -1.147844129 | 0.252103 | 0.29647 | -6.68556827 |
| CAPS    | -0.174309784 | 5.0686226  | -1.147670042 | 0.252175 | 0.29653 | -6.68576701 |
| FAM47E  | -0.021506516 | 0.17310663 | 1.147422764  | 0.252277 | 0.29663 | -6.68604925 |
| SYT2    | -0.060963548 | 0.31197967 | -1.147337282 | 0.252312 | 0.29665 | -6.68614681 |
| IL15RA  | 0.085270642  | 2.82581149 | 1.146914379  | 0.252487 | 0.29683 | -6.68662933 |
| PTPRH   | 0.040718375  | 0.26461395 | 1.146707474  | 0.252572 | 0.29691 | -6.68686534 |
| LYPD3   | 0.105590611  | 1.63008894 | 1.1450003    | 0.253277 | 0.29772 | -6.68881107 |
| KIFC1   | 0.099154463  | 2.06115698 | 1.144548776  | 0.253464 | 0.29792 | -6.68932521 |
| TAC3    | -0.01784986  | 0.06965814 | -1.144458519 | 0.253502 | 0.29794 | -6.68942796 |
| HPS4    | -0.077488846 | 3.50340409 | -1.144121558 | 0.253641 | 0.29809 | -6.68981149 |
| ZDHHC8  | -0.076303904 | 4.44622173 | -1.143869822 | 0.253745 | 0.29819 | -6.69009794 |
| KAZALD  | -0.093488779 | 2.24987248 | -1.143778832 | 0.253783 | 0.29821 | -6.69020146 |
| MEIS1   | -0.051617537 | 0.71104022 | -1.143613875 | 0.253851 | 0.29827 | -6.69038912 |
| XPC     | -0.108195176 | 5.4729779  | -1.140833427 | 0.255004 | 0.29961 | -6.69354816 |
| NOTUM   | -0.085867068 | 0.21118595 | -1.140741943 | 0.255042 | 0.29963 | -6.69365197 |
| FGF1    | -0.119325243 | 3.07799051 | -1.139525404 | 0.255548 | 0.30019 | -6.69503165 |
| DIAPH1  | 0.091571853  | 6.14295483 | 1.139514491  | 0.255553 | 0.30019 | -6.69504402 |

|          |              |            |              |          |         |             |
|----------|--------------|------------|--------------|----------|---------|-------------|
| TBX15    | -0.098192363 | 1.15188454 | -1.139263047 | 0.255657 | 0.30029 | -6.695329   |
| NAV3     | 0.044465875  | 0.31795405 | 1.139179457  | 0.255692 | 0.30031 | -6.69542372 |
| RHOF     | -0.075652994 | 1.63651368 | -1.138879518 | 0.255817 | 0.30044 | -6.69576356 |
| RTN2     | 0.110617007  | 2.45943355 | 1.138785804  | 0.255856 | 0.30046 | -6.69586972 |
| TGFB111  | 0.091381758  | 4.37237231 | 1.137878807  | 0.256234 | 0.30089 | -6.69689674 |
| SLC25A2  | -0.107956007 | 3.94220195 | -1.137779235 | 0.256275 | 0.3009  | -6.69700944 |
| MECOM    | 0.122354596  | 2.40521864 | 1.137772213  | 0.256278 | 0.3009  | -6.69701739 |
| KIAA0581 | -0.06457197  | 2.45397691 | -1.137652102 | 0.256329 | 0.30093 | -6.69715332 |
| E2F1     | 0.118905532  | 3.56307574 | 1.137229497  | 0.256505 | 0.30112 | -6.69763148 |
| ITGA7    | -0.122691564 | 3.84376418 | -1.135061509 | 0.25741  | 0.30216 | -6.70008169 |
| ADGRB1   | -0.078868288 | 0.48644682 | -1.134760278 | 0.257536 | 0.30229 | -6.70042176 |
| ZNF597   | -0.073827658 | 2.38467369 | -1.134519138 | 0.257637 | 0.30239 | -6.70069394 |
| ARAP1    | 0.088784376  | 5.96846885 | 1.134381389  | 0.257695 | 0.30243 | -6.70084939 |
| NR2C2    | 0.118629941  | 3.69397922 | 1.133925882  | 0.257885 | 0.30264 | -6.7013633  |
| LYPD6    | -0.025755049 | 0.09334891 | -1.13375111  | 0.257959 | 0.3027  | -6.70156042 |
| ITSN1    | -0.070114162 | 2.31596098 | -1.133287848 | 0.258153 | 0.30291 | -6.70208279 |
| KBTBD2   | -0.074685161 | 4.97474314 | -1.132818568 | 0.258349 | 0.30312 | -6.70261173 |
| RSPO1    | 0.153086723  | 0.48670136 | 1.132728944  | 0.258387 | 0.30314 | -6.70271273 |
| PAQR7    | -0.090759408 | 4.45322587 | -1.131663705 | 0.258834 | 0.30364 | -6.70391249 |
| ZBTB38   | -0.103585307 | 4.21109297 | -1.131362288 | 0.25896  | 0.30377 | -6.70425177 |
| TBX21    | 0.092684699  | 0.90675062 | 1.131181711  | 0.259036 | 0.30384 | -6.70445499 |
| CCDC78   | -0.087001782 | 0.98151321 | -1.129743501 | 0.259641 | 0.30453 | -6.70607237 |
| CHRD1    | -0.211327876 | 1.64854825 | -1.129542318 | 0.259725 | 0.30461 | -6.70629846 |
| N4BP3    | 0.085202749  | 2.75614448 | 1.12946012   | 0.25976  | 0.30462 | -6.70639082 |
| HEATR1   | 0.09867384   | 3.18703351 | 1.129104237  | 0.25991  | 0.30478 | -6.70679062 |
| KIF20B   | 0.083336796  | 1.96066933 | 1.128838603  | 0.260022 | 0.30489 | -6.70708896 |
| RTN4     | -0.085330439 | 6.53721188 | -1.128235689 | 0.260276 | 0.30517 | -6.70776584 |
| HS3ST2   | -0.121471886 | 0.99071304 | -1.127242356 | 0.260695 | 0.30564 | -6.70888026 |
| C14orf17 | -0.034642263 | 0.26893611 | -1.126931625 | 0.260826 | 0.30577 | -6.70922867 |
| SRGN     | -0.133413663 | 6.76003537 | -1.126199877 | 0.261135 | 0.30611 | -6.71004877 |
| CFAP97   | -0.102977785 | 4.68410348 | -1.125978319 | 0.261228 | 0.3062  | -6.71029697 |
| EMP1     | 0.152223279  | 6.10475257 | 1.125022412  | 0.261632 | 0.30665 | -6.71136729 |
| KLHL40   | 0.046278523  | 0.06629335 | 1.124448612  | 0.261875 | 0.30691 | -6.71200934 |
| SLC27A2  | -0.125930059 | 3.64688192 | -1.123547283 | 0.262257 | 0.30734 | -6.71301722 |
| MYOZ3    | 0.036089284  | 0.25962402 | 1.12349148   | 0.26228  | 0.30735 | -6.71307959 |
| NEFM     | 0.026472105  | 0.08886209 | 1.122993865  | 0.262491 | 0.30757 | -6.71363566 |
| RABGAP   | -0.072983536 | 2.87795677 | -1.122464605 | 0.262716 | 0.30781 | -6.71422683 |
| GADL1    | 0.010024986  | 0.02299147 | 1.122250583  | 0.262806 | 0.3079  | -6.7144658  |
| CTAGE9   | -0.022093616 | 0.14128625 | -1.122032529 | 0.262899 | 0.30799 | -6.71470923 |
| LYG1     | -0.075945307 | 1.47561196 | -1.120143755 | 0.263701 | 0.30891 | -6.71681587 |

|          |              |            |              |          |         |             |
|----------|--------------|------------|--------------|----------|---------|-------------|
| SLC10A1  | 0.018367586  | 0.14441346 | 1.119878123  | 0.263814 | 0.30902 | -6.71711186 |
| NPL      | -0.106329263 | 2.39731546 | -1.117307546 | 0.264909 | 0.31028 | -6.71997263 |
| SNX15    | -0.035346798 | 0.57535892 | -1.117060833 | 0.265015 | 0.31038 | -6.72024685 |
| CELF3    | -0.007685759 | 0.02288391 | -1.116577169 | 0.265221 | 0.3106  | -6.72078426 |
| RMI2     | 0.107615493  | 3.41935612 | 1.115759338  | 0.26557  | 0.31099 | -6.72169247 |
| C19orf67 | -0.049566028 | 0.40124538 | -1.115564431 | 0.265654 | 0.31106 | -6.72190881 |
| CHD2     | -0.088560787 | 4.55634627 | -1.115032757 | 0.265881 | 0.31131 | -6.72249878 |
| EPG5     | 0.086941893  | 3.62854741 | 1.114993874  | 0.265898 | 0.31131 | -6.72254192 |
| FAM3B    | -0.156974423 | 1.67606793 | -1.114442645 | 0.266134 | 0.31156 | -6.72315327 |
| ANXA2R   | -0.075563514 | 1.45894422 | -1.113159359 | 0.266683 | 0.31218 | -6.72457536 |
| CCNB2    | -0.094749408 | 2.04466778 | -1.11154334  | 0.267376 | 0.31297 | -6.72636387 |
| IFNA1    | 0.047252722  | 0.17055871 | 1.111505543  | 0.267393 | 0.31297 | -6.72640567 |
| DUSP23   | -0.090715903 | 6.9800854  | -1.11125074  | 0.267502 | 0.31308 | -6.72668743 |
| RPLP2    | -0.087232183 | 9.86231611 | -1.110969694 | 0.267623 | 0.3132  | -6.72699813 |
| PROZ     | -0.022912802 | 0.17929806 | -1.110789145 | 0.2677   | 0.31327 | -6.72719769 |
| AMY2A    | 0.023808132  | 0.0993821  | 1.110741235  | 0.267721 | 0.31327 | -6.72725064 |
| HMGXB4   | 0.085929605  | 3.45715225 | 1.110365421  | 0.267883 | 0.31344 | -6.7276659  |
| NUP210L  | -0.069723156 | 0.34557249 | -1.108100761 | 0.268857 | 0.31455 | -6.73016533 |
| PRKAR1   | -0.084583627 | 4.11259584 | -1.107944711 | 0.268925 | 0.31461 | -6.73033737 |
| NEIL3    | -0.044148508 | 0.34741856 | -1.107750154 | 0.269009 | 0.31469 | -6.73055183 |
| MIER2    | -0.069476796 | 4.25425486 | -1.1074445   | 0.26914  | 0.31482 | -6.73088868 |
| KLB      | -0.010517636 | 0.10128716 | -1.107229757 | 0.269233 | 0.31491 | -6.73112528 |
| HBEGF    | 0.199948465  | 4.85987024 | 1.107189467  | 0.26925  | 0.31491 | -6.73116966 |
| TUBAL3   | 0.024730758  | 0.08798076 | 1.107146277  | 0.269269 | 0.31491 | -6.73121724 |
| DOCK4    | -0.091506854 | 2.09473275 | -1.107097034 | 0.26929  | 0.31491 | -6.73127149 |
| SLC7A3   | 0.01097957   | 0.04568939 | 1.106655428  | 0.269481 | 0.31511 | -6.73175785 |
| SSBP4    | -0.099863394 | 5.67498224 | -1.106056762 | 0.269739 | 0.31539 | -6.73241688 |
| MYOC     | -0.157944695 | 0.70816146 | -1.104746953 | 0.270306 | 0.31603 | -6.73385753 |
| LAMP2    | -0.095672262 | 6.83895596 | -1.104412796 | 0.27045  | 0.31618 | -6.73422479 |
| CRTC2    | -0.071505229 | 5.58863159 | -1.1035418   | 0.270827 | 0.31659 | -6.73518157 |
| DBNDD1   | 0.079665392  | 3.60783716 | 1.103507898  | 0.270842 | 0.31659 | -6.73521879 |
| CUL7     | -0.083430424 | 5.41997415 | -1.103025961 | 0.271051 | 0.31681 | -6.73574786 |
| PTPN6    | -0.064636957 | 5.02021656 | -1.102376529 | 0.271332 | 0.31712 | -6.73646043 |
| DNAH8    | -0.008361278 | 0.03850885 | -1.101216694 | 0.271836 | 0.31769 | -6.737732   |
| TGM5     | 0.011241974  | 0.057243   | 1.101073662  | 0.271898 | 0.31774 | -6.73788872 |
| FCGR3B   | 0.05590573   | 0.33293036 | 1.100733506  | 0.272046 | 0.31789 | -6.73826135 |
| CCDC12   | 0.086054162  | 3.74031348 | 1.100296435  | 0.272236 | 0.31807 | -6.73873997 |
| TAF7L    | -0.032883765 | 0.11355679 | -1.100294125 | 0.272237 | 0.31807 | -6.7387425  |
| GBGT1    | 0.069486712  | 2.96907701 | 1.10003583   | 0.272349 | 0.31818 | -6.73902527 |
| ZNF83    | 0.094487092  | 4.16383076 | 1.099789891  | 0.272456 | 0.31828 | -6.73929444 |

|          |              |            |              |          |         |             |
|----------|--------------|------------|--------------|----------|---------|-------------|
| SV2A     | -0.173583456 | 3.6437902  | -1.099745129 | 0.272475 | 0.31828 | -6.73934343 |
| HEYL     | -0.133518061 | 3.66251677 | -1.098545323 | 0.272998 | 0.31885 | -6.74065568 |
| DGKD     | -0.10307897  | 3.72170824 | -1.09853482  | 0.273002 | 0.31885 | -6.74066716 |
| HERC5    | 0.101321979  | 2.93536208 | 1.098437813  | 0.273044 | 0.31888 | -6.7407732  |
| PLD2     | -0.077570805 | 4.1708473  | -1.097551804 | 0.273431 | 0.31931 | -6.74174124 |
| PCSK7    | -0.064820344 | 1.65639061 | -1.097480742 | 0.273462 | 0.31932 | -6.74181885 |
| KLF6     | 0.181187851  | 6.44333506 | 1.097094849  | 0.27363  | 0.3195  | -6.7422402  |
| EVC2     | -0.07787928  | 2.64047167 | -1.095506897 | 0.274323 | 0.32029 | -6.74397253 |
| ZNF177   | -0.011184184 | 0.06482214 | -1.094728502 | 0.274664 | 0.32066 | -6.74482079 |
| SV2C     | -0.025046419 | 0.08675859 | -1.094653601 | 0.274696 | 0.32068 | -6.74490238 |
| CDK9     | -0.074325505 | 6.17490857 | -1.094485072 | 0.27477  | 0.32074 | -6.74508595 |
| TMTC4    | -0.080949005 | 3.0649506  | -1.093716395 | 0.275107 | 0.32108 | -6.74592284 |
| WDR64    | -0.00992212  | 0.08119284 | -1.093693813 | 0.275116 | 0.32108 | -6.74594742 |
| ARFGEF   | -0.108839766 | 1.93346111 | -1.093683679 | 0.275121 | 0.32108 | -6.74595845 |
| MCM6     | 0.090983142  | 4.04831119 | 1.092904747  | 0.275462 | 0.32146 | -6.7468059  |
| RAB6D    | -0.021470763 | 0.15671944 | -1.092316801 | 0.27572  | 0.32173 | -6.74744516 |
| PLA2G2C  | 0.024765608  | 0.17221426 | 1.092269539  | 0.275741 | 0.32173 | -6.74749653 |
| SERPINE1 | 0.067900934  | 0.25866037 | 1.092254944  | 0.275747 | 0.32173 | -6.74751239 |
| KMT2A    | 0.090206834  | 3.73743341 | 1.091353348  | 0.276143 | 0.32217 | -6.74849197 |
| STEAP1   | 0.027842842  | 0.25310084 | 1.091238267  | 0.276193 | 0.3222  | -6.74861694 |
| C2orf92  | -0.07747827  | 1.31080148 | -1.090448551 | 0.27654  | 0.32259 | -6.74947421 |
| HCAR1    | 0.15463028   | 1.83438227 | 1.089932562  | 0.276767 | 0.32281 | -6.75003401 |
| MBNL3    | -0.082242314 | 2.69299107 | -1.089915286 | 0.276774 | 0.32281 | -6.75005274 |
| PNMT     | 0.157606439  | 1.89251495 | 1.089552585  | 0.276934 | 0.32298 | -6.75044607 |
| CKS2     | -0.121734234 | 5.91559258 | -1.088452162 | 0.277418 | 0.32352 | -6.75163863 |
| NBPF19   | -0.042525332 | 0.90868822 | -1.088088065 | 0.277579 | 0.32369 | -6.75203295 |
| AOAH     | 0.121510267  | 1.70567723 | 1.087645797  | 0.277774 | 0.32389 | -6.75251175 |
| GNRHR    | -0.02580757  | 0.27119101 | -1.086014359 | 0.278493 | 0.32471 | -6.75427628 |
| GM2A     | 0.083764542  | 5.1216254  | 1.085635946  | 0.27866  | 0.32488 | -6.75468519 |
| RCC1     | 0.078542354  | 4.16865612 | 1.085491178  | 0.278724 | 0.32493 | -6.75484159 |
| HOXB6    | -0.065869974 | 0.86995665 | -1.084909939 | 0.278981 | 0.32521 | -6.75546931 |
| PRAP1    | -0.075856248 | 0.25156866 | -1.084425309 | 0.279196 | 0.32542 | -6.75599245 |
| WNT8A    | 0.013167763  | 0.06183643 | 1.08441894   | 0.279198 | 0.32542 | -6.75599932 |
| RIC1     | -0.080671242 | 3.21697088 | -1.084250295 | 0.279273 | 0.32548 | -6.75618131 |
| ADAM17   | -0.113431258 | 3.49769407 | -1.083704158 | 0.279515 | 0.32574 | -6.75677047 |
| SLC5A11  | -0.015750094 | 0.13559966 | -1.083593137 | 0.279564 | 0.32578 | -6.7568902  |
| CNGA3    | -0.052805897 | 0.3546862  | -1.082329466 | 0.280124 | 0.32641 | -6.75825214 |
| CNEP1R   | -0.061807475 | 2.80831975 | -1.082241182 | 0.280163 | 0.32643 | -6.75834723 |
| UCN      | 0.134293392  | 2.7578541  | 1.081727793  | 0.280391 | 0.32667 | -6.75890005 |
| ALOX12   | -0.059853488 | 1.18498063 | -1.081245318 | 0.280605 | 0.3269  | -6.75941935 |



|          |              |            |              |          |         |             |
|----------|--------------|------------|--------------|----------|---------|-------------|
| CCDC17   | -0.050394081 | 1.01932736 | -1.080988756 | 0.280719 | 0.32701 | -6.75969539 |
| NF1      | -0.089304296 | 3.73935071 | -1.08069911  | 0.280847 | 0.32714 | -6.76000696 |
| CALCA    | -0.194542221 | 0.76760364 | -1.080159168 | 0.281087 | 0.32738 | -6.76058754 |
| CHN1     | -0.094566205 | 2.79055124 | -1.080146093 | 0.281093 | 0.32738 | -6.7606016  |
| CCDC71   | 0.089384586  | 4.21234975 | 1.078976528  | 0.281613 | 0.32796 | -6.7618582  |
| SNX27    | 0.078767999  | 4.46246538 | 1.078880563  | 0.281656 | 0.32799 | -6.76196125 |
| ARID4B   | -0.084676212 | 4.09516524 | -1.078788113 | 0.281697 | 0.32801 | -6.76206051 |
| GOLGA8   | -0.201847087 | 4.97894634 | -1.078700355 | 0.281736 | 0.32804 | -6.76215473 |
| AGAP5    | -0.025122144 | 0.28562101 | -1.078060139 | 0.282021 | 0.32835 | -6.76284184 |
| CDHR2    | -0.012022606 | 0.11115894 | -1.07781091  | 0.282132 | 0.32845 | -6.76310921 |
| SEPTIN8  | 0.097681298  | 4.93467093 | 1.077282576  | 0.282367 | 0.3287  | -6.76367581 |
| CASP4    | 0.09995719   | 2.65400876 | 1.077198872  | 0.282405 | 0.32871 | -6.76376556 |
| IL17RE   | -0.108031803 | 3.44290852 | -1.077185764 | 0.28241  | 0.32871 | -6.76377961 |
| CRH      | -0.03569102  | 0.11215466 | -1.076832101 | 0.282568 | 0.32887 | -6.7641587  |
| LGALS8   | 0.065519634  | 3.91704339 | 1.076569199  | 0.282685 | 0.32898 | -6.76444042 |
| SLC26A10 | 0.078229867  | 1.65918025 | 1.076046568  | 0.282919 | 0.32923 | -6.76500027 |
| RTN1     | -0.097653617 | 1.53704833 | -1.076009066 | 0.282935 | 0.32923 | -6.76504043 |
| SOAT1    | -0.075011835 | 3.87764441 | -1.075936956 | 0.282968 | 0.32923 | -6.76511765 |
| OR1L8    | -0.02568561  | 0.23050116 | -1.075923449 | 0.282974 | 0.32923 | -6.76513212 |
| PLXNA2   | -0.108039393 | 4.01293248 | -1.075313989 | 0.283246 | 0.32952 | -6.76578456 |
| KCNJ12   | 0.108786315  | 1.69903985 | 1.075253335  | 0.283273 | 0.32953 | -6.76584947 |
| SERTAD   | 0.097937874  | 2.00483618 | 1.074706957  | 0.283517 | 0.32979 | -6.76643404 |
| OLFML2   | -0.126334393 | 5.57374797 | -1.074591262 | 0.283569 | 0.32983 | -6.76655778 |
| DSEL     | -0.041615632 | 0.67732119 | -1.073964534 | 0.283849 | 0.33012 | -6.76722788 |
| DKK1     | -0.099944188 | 0.73539775 | -1.073948673 | 0.283856 | 0.33012 | -6.76724484 |
| FAM183   | -0.109696289 | 0.39848805 | -1.073913835 | 0.283872 | 0.33012 | -6.76728207 |
| MICU3    | 0.092391007  | 2.60343975 | 1.073794959  | 0.283925 | 0.33016 | -6.76740913 |
| TRPM1    | -0.006423376 | 0.02042378 | -1.073194492 | 0.284194 | 0.33045 | -6.76805068 |
| PEAK3    | 0.051541722  | 0.58459211 | 1.072882339  | 0.284333 | 0.33059 | -6.76838406 |
| OTOF     | 0.014347923  | 0.08283114 | 1.072732357  | 0.284401 | 0.33064 | -6.7685442  |
| IFI44L   | -0.142604769 | 2.51293563 | -1.069949754 | 0.285649 | 0.33207 | -6.77151131 |
| PPDPF    | -0.082537086 | 9.52515587 | -1.069816357 | 0.285709 | 0.33212 | -6.77165336 |
| SIAH2    | 0.079868306  | 4.31313102 | 1.069515639  | 0.285844 | 0.33225 | -6.77197352 |
| SP100    | 0.074582327  | 4.04089026 | 1.069330777  | 0.285927 | 0.33232 | -6.77217029 |
| COLGAL   | 0.13653913   | 2.62216805 | 1.069264177  | 0.285957 | 0.33234 | -6.77224118 |
| IGFBP1   | -0.050486463 | 0.25371178 | -1.069154132 | 0.286006 | 0.33237 | -6.77235829 |
| ADRB2    | 0.077803626  | 1.06070274 | 1.068612721  | 0.28625  | 0.33263 | -6.77293428 |
| SRM      | -0.061337276 | 5.83498576 | -1.067247243 | 0.286865 | 0.33332 | -6.77438571 |
| LCNL1    | -0.035697145 | 0.10482903 | -1.066598317 | 0.287157 | 0.33364 | -6.77507484 |
| USF3     | -0.081144007 | 2.78501792 | -1.066431918 | 0.287232 | 0.3337  | -6.77525148 |

|         |              |            |              |          |         |             |
|---------|--------------|------------|--------------|----------|---------|-------------|
| UBQLN4  | 0.085817654  | 4.74917902 | 1.066247161  | 0.287316 | 0.33378 | -6.77544757 |
| PROK2   | 0.019119278  | 0.09057487 | 1.066070547  | 0.287395 | 0.33385 | -6.77563499 |
| PNMA2   | -0.152089343 | 1.49241286 | -1.064216033 | 0.288233 | 0.3348  | -6.77760114 |
| ADGRB3  | 0.089246188  | 0.8768243  | 1.063542477  | 0.288537 | 0.33513 | -6.7783144  |
| LIMK1   | 0.080354406  | 5.0574721  | 1.063312506  | 0.288641 | 0.33523 | -6.77855782 |
| LRP11   | -0.091298615 | 5.97457624 | -1.063268166 | 0.288661 | 0.33523 | -6.77860475 |
| CD44    | -0.128927303 | 7.11497183 | -1.062886235 | 0.288834 | 0.3354  | -6.77900889 |
| PSAP    | -0.092037328 | 10.7560169 | -1.062653501 | 0.28894  | 0.3355  | -6.77925509 |
| SEH1L   | -0.062675901 | 3.43608606 | -1.06171583  | 0.289364 | 0.33597 | -6.78024647 |
| STMND1  | -0.012422615 | 0.03218475 | -1.059587448 | 0.29033  | 0.33707 | -6.78249353 |
| CREB3L  | 0.135945404  | 2.39971569 | 1.05938337   | 0.290423 | 0.33716 | -6.78270876 |
| HPCA    | -0.092984554 | 1.24901045 | -1.059151565 | 0.290528 | 0.33726 | -6.78295317 |
| SVOPL   | -0.107080204 | 1.16537589 | -1.059097144 | 0.290553 | 0.33726 | -6.78301054 |
| ANO6    | 0.124560294  | 4.66562343 | 1.057722373  | 0.291178 | 0.33796 | -6.78445893 |
| APOBEC  | 0.10844214   | 1.98550312 | 1.057458792  | 0.291298 | 0.33805 | -6.78473642 |
| ARRDC1  | 0.065679576  | 5.29472345 | 1.057432439  | 0.29131  | 0.33805 | -6.78476415 |
| ITPRIPL | 0.052168823  | 0.79824711 | 1.057422107  | 0.291315 | 0.33805 | -6.78477503 |
| MUSTN1  | -0.025744059 | 0.19906263 | -1.057371223 | 0.291338 | 0.33806 | -6.78482859 |
| RTL10   | -0.096296602 | 3.8780147  | -1.056199479 | 0.291872 | 0.33865 | -6.7860612  |
| IL16    | 0.104241655  | 1.63120416 | 1.054725357  | 0.292544 | 0.33941 | -6.78760998 |
| XIAP    | -0.077095665 | 4.94724164 | -1.054242423 | 0.292765 | 0.33964 | -6.7881169  |
| CROCC   | -0.079902713 | 3.11880198 | -1.05402822  | 0.292863 | 0.33973 | -6.78834167 |
| HEY2    | 0.140856806  | 4.17140235 | 1.053016451  | 0.293325 | 0.34025 | -6.78940274 |
| VIT     | -0.079462335 | 0.33939791 | -1.052451079 | 0.293584 | 0.34052 | -6.78999522 |
| U2AF1   | 0.033561627  | 0.3301449  | 1.051973237  | 0.293803 | 0.34075 | -6.79049573 |
| INSR    | -0.088417716 | 5.35628609 | -1.051794199 | 0.293885 | 0.34083 | -6.7906832  |
| TSPAN2  | -0.083163893 | 1.46795434 | -1.051195418 | 0.294159 | 0.34112 | -6.79130996 |
| CELSR1  | 0.142176518  | 3.60691494 | 1.050779132  | 0.29435  | 0.34132 | -6.79174549 |
| AGER    | 0.199123443  | 5.07597068 | 1.050097834  | 0.294663 | 0.34166 | -6.79245791 |
| LIMA1   | 0.098311762  | 5.15086902 | 1.049724315  | 0.294834 | 0.34183 | -6.7928483  |
| TYRO3   | -0.101990126 | 2.16900872 | -1.049596736 | 0.294893 | 0.34188 | -6.79298161 |
| HEATR6  | -0.064221109 | 3.30847386 | -1.04936748  | 0.294998 | 0.34197 | -6.79322112 |
| MEAF6   | -0.081406498 | 6.382612   | -1.049327055 | 0.295016 | 0.34197 | -6.79326335 |
| SRC     | 0.080119691  | 4.50108799 | 1.049223676  | 0.295064 | 0.34201 | -6.79337134 |
| FAM153B | 0.057403783  | 0.44658994 | 1.049135809  | 0.295104 | 0.34203 | -6.79346311 |
| POGZ    | -0.085015965 | 4.95524092 | -1.047411125 | 0.295897 | 0.34293 | -6.7952629  |
| RBL2    | -0.11490035  | 5.04943658 | -1.047148849 | 0.296018 | 0.34304 | -6.79553634 |
| FFAR2   | -0.055399943 | 0.4492229  | -1.047057205 | 0.29606  | 0.34307 | -6.79563187 |
| GSTM1   | -0.275746951 | 2.45659564 | -1.046301372 | 0.296408 | 0.34345 | -6.79641942 |
| PIPOX   | 0.037863564  | 0.65030687 | 1.045246015  | 0.296894 | 0.34399 | -6.79751814 |

|         |              |            |              |          |         |             |
|---------|--------------|------------|--------------|----------|---------|-------------|
| CBSL    | -0.067576124 | 0.45622763 | -1.044895021 | 0.297056 | 0.34414 | -6.7978833  |
| CALY    | -0.065783169 | 0.2532626  | -1.044870102 | 0.297068 | 0.34414 | -6.79790923 |
| BTBD18  | -0.011118915 | 0.11088478 | -1.043819388 | 0.297553 | 0.34466 | -6.79900162 |
| CSF3R   | 0.083027913  | 1.50112174 | 1.043805617  | 0.297559 | 0.34466 | -6.79901593 |
| OBP2B   | 0.15249498   | 0.44171816 | 1.042840283  | 0.298005 | 0.34516 | -6.80001859 |
| COL13A1 | -0.161738057 | 2.85179436 | -1.041558229 | 0.298598 | 0.34582 | -6.80134878 |
| FLNC    | 0.108443621  | 1.03430032 | 1.041498188  | 0.298626 | 0.34583 | -6.80141104 |
| SYNPO2  | 0.096149145  | 2.14425971 | 1.041292663  | 0.298721 | 0.34591 | -6.80162412 |
| NRN1L   | 0.017523107  | 0.0901309  | 1.041123658  | 0.2988   | 0.34598 | -6.80179931 |
| GFI1B   | 0.008303056  | 0.03596437 | 1.040535865  | 0.299072 | 0.34627 | -6.80240838 |
| ZNF710  | -0.094428476 | 3.84577243 | -1.040485841 | 0.299095 | 0.34628 | -6.8024602  |
| SLC22A1 | -0.104517464 | 1.42827042 | -1.040335528 | 0.299165 | 0.34633 | -6.80261589 |
| ATP11C  | 0.08084327   | 2.61734948 | 1.039369418  | 0.299613 | 0.34683 | -6.80361604 |
| CBLC    | -0.116262575 | 1.17708975 | -1.038631371 | 0.299955 | 0.3472  | -6.80437947 |
| MBOAT7  | -0.07528758  | 5.76160642 | -1.038190944 | 0.30016  | 0.34741 | -6.80483479 |
| TSTD2   | -0.111912967 | 2.60750426 | -1.038010908 | 0.300244 | 0.34749 | -6.80502086 |
| ABI3BP  | -0.171778017 | 2.74638481 | -1.036875484 | 0.300771 | 0.34807 | -6.80619359 |
| VANGL2  | -0.102480485 | 4.2627092  | -1.03647101  | 0.30096  | 0.34827 | -6.80661105 |
| ALAS2   | -0.034793336 | 0.1795647  | -1.034702418 | 0.301783 | 0.3492  | -6.80843451 |
| STS     | -0.086469717 | 3.28651139 | -1.034142475 | 0.302045 | 0.34948 | -6.80901118 |
| RHEBL1  | -0.056658578 | 1.37746521 | -1.033815855 | 0.302197 | 0.34963 | -6.80934741 |
| NPTX2   | 0.12058803   | 1.32867301 | 1.033683635  | 0.302259 | 0.34968 | -6.80948349 |
| NPHP4   | -0.09108107  | 2.82687887 | -1.033160183 | 0.302503 | 0.34994 | -6.81002207 |
| MYH9    | 0.090022463  | 8.10030186 | 1.0326721    | 0.302731 | 0.35018 | -6.81052401 |
| PALD1   | -0.093565415 | 3.2809134  | -1.032146436 | 0.302977 | 0.35044 | -6.81106433 |
| ISG20   | -0.110945392 | 3.13007995 | -1.031836976 | 0.303121 | 0.35058 | -6.81138229 |
| IRX3    | 0.164773662  | 3.48479112 | 1.031744573  | 0.303165 | 0.35061 | -6.81147721 |
| TMTC3   | -0.073023956 | 3.32053281 | -1.03093907  | 0.303542 | 0.35102 | -6.81230433 |
| ZNF705E | -0.009469347 | 0.08131584 | -1.03083406  | 0.303591 | 0.35105 | -6.81241211 |
| CCDC18  | -0.102554583 | 3.00412855 | -1.030738784 | 0.303635 | 0.35106 | -6.81250989 |
| NTRK1   | 0.066037915  | 0.16858864 | 1.030722686  | 0.303643 | 0.35106 | -6.81252641 |
| SLC52A3 | -0.075989274 | 1.24479849 | -1.028890439 | 0.304501 | 0.35203 | -6.81440505 |
| NIPIB5  | 0.058606399  | 0.5864233  | 1.028691075  | 0.304595 | 0.35212 | -6.81460926 |
| PRR5    | -0.072763007 | 2.62127912 | -1.028507969 | 0.304681 | 0.35219 | -6.81479678 |
| CDX1    | 0.02769802   | 0.2066755  | 1.027781899  | 0.305022 | 0.35256 | -6.81554004 |
| OLFML1  | -0.100634177 | 2.22235682 | -1.027639404 | 0.305089 | 0.35261 | -6.81568585 |
| STAC2   | 0.074680669  | 0.34153198 | 1.027583546  | 0.305115 | 0.35262 | -6.815743   |
| MAPK13  | 0.112043075  | 5.69997916 | 1.026883818  | 0.305444 | 0.35298 | -6.81645867 |
| ADAMTS  | 0.140288742  | 2.01690286 | 1.026177922  | 0.305776 | 0.35334 | -6.81718015 |
| PHYHIPL | -0.029339532 | 0.1272813  | -1.024927771 | 0.306364 | 0.35399 | -6.8184567  |

|         |              |            |              |          |         |             |
|---------|--------------|------------|--------------|----------|---------|-------------|
| RASAL3  | 0.103883092  | 2.48853762 | 1.024782421  | 0.306432 | 0.35405 | -6.81860502 |
| PM20D2  | -0.091053994 | 4.21824463 | -1.024712295 | 0.306465 | 0.35406 | -6.81867657 |
| USP6    | -0.057610539 | 0.48310687 | -1.024606306 | 0.306515 | 0.35409 | -6.81878471 |
| DUSP18  | -0.04583011  | 1.77931241 | -1.023890951 | 0.306852 | 0.35446 | -6.81951425 |
| GPR39   | 0.084837524  | 1.46439354 | 1.022507164  | 0.307505 | 0.35519 | -6.82092404 |
| CKAP2   | -0.081408852 | 3.13128275 | -1.020451015 | 0.308477 | 0.35629 | -6.82301533 |
| PML     | 0.061817854  | 4.71820785 | 1.01977001   | 0.308799 | 0.35664 | -6.82370706 |
| BMP6    | -0.1023666   | 2.06488411 | -1.019220122 | 0.30906  | 0.35691 | -6.82426527 |
| DTX2    | 0.061695939  | 3.14290964 | 1.017295918  | 0.309972 | 0.35794 | -6.82621624 |
| DPYSL4  | 0.146495323  | 1.28049052 | 1.016548832  | 0.310327 | 0.35831 | -6.82697274 |
| CAND1   | 0.093337379  | 4.92088439 | 1.016494044  | 0.310353 | 0.35831 | -6.8270282  |
| CPT1C   | 0.112595918  | 1.32946585 | 1.016488603  | 0.310356 | 0.35831 | -6.8270337  |
| BCL10   | -0.073933537 | 4.20760962 | -1.014928747 | 0.311097 | 0.35914 | -6.82861133 |
| NHEJ1   | -0.025783308 | 0.48221989 | -1.01469076  | 0.31121  | 0.35925 | -6.82885182 |
| MTMR7   | 0.109211356  | 2.14218731 | 1.012980896  | 0.312025 | 0.36016 | -6.830578   |
| PAFAH1I | 0.08695439   | 5.33185931 | 1.01238789   | 0.312308 | 0.36047 | -6.831176   |
| OSR2    | 0.100706807  | 0.75311342 | 1.012296654  | 0.312351 | 0.36049 | -6.83126797 |
| KLRF1   | -0.130061126 | 1.53131179 | -1.011869213 | 0.312555 | 0.3607  | -6.83169875 |
| POLG    | -0.066036227 | 4.18774297 | -1.011436222 | 0.312762 | 0.36091 | -6.83213494 |
| DDX58   | 0.08853352   | 3.64543619 | 1.011404428  | 0.312777 | 0.36091 | -6.83216696 |
| GRIN3B  | 0.063262767  | 0.62327034 | 1.011307879  | 0.312823 | 0.36094 | -6.83226419 |
| BAZ2A   | 0.086046169  | 4.92130054 | 1.010927964  | 0.313005 | 0.36112 | -6.83264672 |
| ADRA2C  | -0.160604575 | 2.10186985 | -1.010252321 | 0.313327 | 0.36145 | -6.83332664 |
| EIF4E3  | -0.082979296 | 4.05623786 | -1.010240889 | 0.313333 | 0.36145 | -6.83333814 |
| FTH1    | -0.110172451 | 9.86037878 | -1.01010463  | 0.313398 | 0.3615  | -6.83347521 |
| SAMD10  | -0.057214178 | 3.46485737 | -1.009990659 | 0.313453 | 0.36154 | -6.83358984 |
| PTGDR   | -0.049610137 | 0.55901222 | -1.009877912 | 0.313507 | 0.36158 | -6.83370323 |
| CADPS   | -0.05685792  | 0.11974905 | -1.008988494 | 0.313932 | 0.36205 | -6.83459727 |
| GSG1L   | -0.06800204  | 0.2552801  | -1.008562286 | 0.314136 | 0.36226 | -6.83502541 |
| KRT12   | -0.024700506 | 0.07371193 | -1.008347908 | 0.314239 | 0.36235 | -6.8352407  |
| OLIG1   | 0.023523721  | 0.1294275  | 1.007849647  | 0.314477 | 0.3626  | -6.83574089 |
| MYOM3   | 0.052986678  | 0.65178933 | 1.007491859  | 0.314649 | 0.36277 | -6.83609992 |
| AGO2    | 0.076006229  | 3.08961639 | 1.007223781  | 0.314777 | 0.3629  | -6.83636884 |
| BICD2   | -0.068941818 | 4.21676304 | -1.006896524 | 0.314934 | 0.36305 | -6.83669703 |
| RSKR    | -0.065977212 | 1.11847073 | -1.006619818 | 0.315067 | 0.36318 | -6.83697444 |
| MAPKAP  | -0.05728465  | 6.70543246 | -1.006477658 | 0.315135 | 0.36324 | -6.83711693 |
| OR2A7   | -0.089309752 | 1.61096407 | -1.005518    | 0.315596 | 0.36374 | -6.83807832 |
| BEST1   | 0.043824448  | 0.98670737 | 1.005371397  | 0.315667 | 0.3638  | -6.83822511 |
| SLC40A1 | -0.098931713 | 6.82851951 | -1.004287899 | 0.316187 | 0.36437 | -6.83930931 |
| GLT1D1  | 0.155170408  | 3.40723136 | 1.004013338  | 0.316319 | 0.3645  | -6.83958386 |

|         |              |            |              |          |         |             |
|---------|--------------|------------|--------------|----------|---------|-------------|
| SCARB2  | -0.085090231 | 7.5679185  | -1.003797787 | 0.316423 | 0.36458 | -6.83979936 |
| ACRV1   | -0.016826493 | 0.17751077 | -1.003773037 | 0.316435 | 0.36458 | -6.8398241  |
| STK17A  | 0.08594922   | 3.47755481 | 1.003120598  | 0.316749 | 0.36492 | -6.84047607 |
| TAF1    | -0.088348249 | 3.85672922 | -1.002968717 | 0.316822 | 0.36498 | -6.84062778 |
| RTKL1-T | -0.055590645 | 0.88599055 | -1.002307467 | 0.317141 | 0.36532 | -6.84128802 |
| CRB3    | -0.071309505 | 5.45021883 | -1.001836408 | 0.317368 | 0.36556 | -6.8417581  |
| VMP1    | 0.095091011  | 5.953109   | 1.001257628  | 0.317647 | 0.36586 | -6.84233538 |
| SHC1    | -0.076477244 | 6.25823353 | -1.000081478 | 0.318215 | 0.36649 | -6.84350746 |
| TMEM20  | -0.057537666 | 1.02889774 | -0.999867244 | 0.318318 | 0.36658 | -6.84372081 |
| CDC42BI | -0.079550781 | 3.35342768 | -0.999810916 | 0.318345 | 0.36659 | -6.84377689 |
| PAK3    | -0.114246584 | 1.12424798 | -0.999433792 | 0.318528 | 0.36677 | -6.84415232 |
| TUBB1   | -0.020190181 | 0.17696688 | -0.999211955 | 0.318635 | 0.36687 | -6.84437309 |
| DEFB13  | 0.074006498  | 0.84320064 | 0.999110285  | 0.318684 | 0.3669  | -6.84447426 |
| SEPTIN9 | 0.082803044  | 6.0120419  | 0.998393082  | 0.319031 | 0.36728 | -6.84518762 |
| SULT4A  | 0.084200535  | 0.42357809 | 0.997825083  | 0.319306 | 0.36757 | -6.84575222 |
| BPGM    | -0.06368068  | 4.73100259 | -0.997498421 | 0.319464 | 0.36772 | -6.84607678 |
| ALPK1   | -0.062051121 | 2.56995358 | -0.996592658 | 0.319903 | 0.3682  | -6.84697616 |
| CCNT2   | -0.078200712 | 3.79070698 | -0.996396626 | 0.319998 | 0.36829 | -6.8471707  |
| DBF4    | 0.049715741  | 1.9960537  | 0.996000903  | 0.320189 | 0.36849 | -6.84756331 |
| LBX2    | -0.05957825  | 0.89349154 | -0.995828628 | 0.320273 | 0.36856 | -6.84773418 |
| ACTA2   | -0.112749572 | 6.63767918 | -0.995339896 | 0.32051  | 0.3688  | -6.84821876 |
| POLR3C  | -0.062812377 | 4.70134735 | -0.995306955 | 0.320526 | 0.3688  | -6.84825141 |
| RYR3    | -0.051951099 | 0.32060726 | -0.995141523 | 0.320606 | 0.36886 | -6.84841538 |
| ZMAT1   | -0.119369238 | 4.02829487 | -0.994865483 | 0.32074  | 0.36899 | -6.84868892 |
| ERBIN   | -0.078790966 | 4.96315993 | -0.994704253 | 0.320819 | 0.36906 | -6.84884866 |
| PRIM2   | -0.05276089  | 2.46098379 | -0.994655285 | 0.320842 | 0.36906 | -6.84889716 |
| UCP2    | 0.137184929  | 7.73883396 | 0.994348953  | 0.320991 | 0.36921 | -6.84920057 |
| MUC19   | 0.005698177  | 0.01300149 | 0.993984112  | 0.321168 | 0.36937 | -6.8495618  |
| MSL3    | -0.058351617 | 3.52648229 | -0.993974837 | 0.321173 | 0.36937 | -6.84957098 |
| SLC2A   | -0.053279996 | 0.24835074 | -0.993663267 | 0.321324 | 0.36952 | -6.84987937 |
| PHETA1  | -0.091279666 | 4.39131658 | -0.992444397 | 0.321917 | 0.37017 | -6.85108484 |
| MFAP3   | -0.119881028 | 2.79304677 | -0.992092669 | 0.322088 | 0.37034 | -6.85143243 |
| ARMCX3  | 0.1579476    | 7.27463493 | 0.992017616  | 0.322125 | 0.37036 | -6.85150659 |
| MAGEB1  | -0.01832737  | 0.09823238 | -0.991570277 | 0.322343 | 0.37059 | -6.85194845 |
| PKLR    | 0.009341499  | 0.04424286 | 0.99127789   | 0.322485 | 0.37072 | -6.85223716 |
| CALHM6  | 0.151399602  | 2.44277282 | 0.991120387  | 0.322562 | 0.37079 | -6.85239264 |
| HAUS5   | 0.055677166  | 3.5797001  | 0.990273761  | 0.322975 | 0.37124 | -6.85322799 |
| MYO7A   | -0.100941014 | 1.45153996 | -0.989444753 | 0.323379 | 0.37167 | -6.85404527 |
| ZG16B   | 0.035451071  | 0.31587835 | 0.989408889  | 0.323397 | 0.37167 | -6.85408061 |
| NEDD9   | 0.128666012  | 4.57797742 | 0.989375284  | 0.323413 | 0.37167 | -6.85411373 |

|         |              |            |              |          |         |             |
|---------|--------------|------------|--------------|----------|---------|-------------|
| DPT     | -0.241412702 | 2.4776631  | -0.989319748 | 0.32344  | 0.37167 | -6.85416845 |
| IGSF8   | -0.077352232 | 6.69189025 | -0.989089237 | 0.323553 | 0.37178 | -6.85439555 |
| CYP27A  | 0.12126848   | 4.24966646 | 0.988963131  | 0.323614 | 0.37182 | -6.85451977 |
| LMO3    | 0.146883358  | 6.31970488 | 0.988098424  | 0.324037 | 0.37228 | -6.85537111 |
| KCNK13  | -0.136804711 | 3.00608499 | -0.987603503 | 0.324279 | 0.37253 | -6.85585805 |
| FAM9C   | -0.00553697  | 0.01599176 | -0.986835303 | 0.324654 | 0.37294 | -6.85661338 |
| MOB1A   | -0.070824314 | 5.84754395 | -0.986230332 | 0.32495  | 0.37326 | -6.8572078  |
| SLC29A1 | -0.08486005  | 5.75415204 | -0.986109488 | 0.32501  | 0.37329 | -6.85732649 |
| B3GNT4  | -0.0297701   | 0.43502404 | -0.9860845   | 0.325022 | 0.37329 | -6.85735104 |
| HTT     | 0.068001191  | 4.36942861 | 0.985769639  | 0.325176 | 0.37344 | -6.85766022 |
| HOXC6   | 0.056231438  | 0.32066398 | 0.985459249  | 0.325328 | 0.37359 | -6.85796492 |
| SERINC2 | 0.082880821  | 7.08619538 | 0.984377959  | 0.325858 | 0.37417 | -6.85902563 |
| ZNF300  | 0.106852568  | 3.12679336 | 0.983615075  | 0.326233 | 0.37458 | -6.8597733  |
| MTHFD1  | 0.084637328  | 4.2205308  | 0.982199564  | 0.326928 | 0.37535 | -6.86115906 |
| PRELID3 | 0.107120369  | 2.71977227 | 0.982004229  | 0.327024 | 0.37543 | -6.86135014 |
| CENPA   | -0.061490798 | 0.74147427 | -0.981914302 | 0.327068 | 0.37546 | -6.86143809 |
| REXO5   | -0.04683083  | 1.41463398 | -0.981227045 | 0.327406 | 0.37582 | -6.86211    |
| PDS5A   | -0.070083306 | 4.95707147 | -0.980605587 | 0.327712 | 0.37612 | -6.86271717 |
| AGR2    | -0.25020886  | 4.99868186 | -0.980604493 | 0.327713 | 0.37612 | -6.86271824 |
| C1orf61 | 0.006464666  | 0.02403835 | 0.979751248  | 0.328133 | 0.37656 | -6.86355125 |
| B4GALT1 | -0.111917141 | 2.35461813 | -0.979746384 | 0.328135 | 0.37656 | -6.863556   |
| ST3GAL1 | -0.119758301 | 6.70887245 | -0.97908414  | 0.328462 | 0.37691 | -6.86420204 |
| USP4    | -0.064616404 | 4.94353202 | -0.978859849 | 0.328573 | 0.37701 | -6.86442074 |
| PHYHD1  | -0.153701746 | 4.68305574 | -0.978530587 | 0.328735 | 0.37717 | -6.86474171 |
| ARHGEF  | -0.06457119  | 4.69124395 | -0.978383214 | 0.328808 | 0.37723 | -6.86488534 |
| USP25   | 0.077853434  | 3.90496065 | 0.978039406  | 0.328977 | 0.3774  | -6.86522032 |
| CD96    | 0.101062659  | 1.91384202 | 0.977816304  | 0.329088 | 0.3775  | -6.86543764 |
| TDRKH   | 0.088819335  | 3.82672966 | 0.977044009  | 0.329469 | 0.37791 | -6.86618952 |
| TMEM15  | -0.00922494  | 0.05208548 | -0.976592436 | 0.329692 | 0.37814 | -6.86662889 |
| THEGL   | -0.016289577 | 0.07155632 | -0.976182723 | 0.329895 | 0.37834 | -6.86702735 |
| NTF3    | 0.063264532  | 0.4282808  | 0.976119776  | 0.329926 | 0.37836 | -6.86708855 |
| DPYSL5  | -0.040572763 | 0.0345625  | -0.975586624 | 0.33019  | 0.37863 | -6.86760678 |
| OGN     | 0.16224124   | 1.49623933 | 0.975102403  | 0.330429 | 0.37888 | -6.8680772  |
| RHOU    | -0.105969832 | 5.92384079 | -0.974443539 | 0.330755 | 0.37923 | -6.86871692 |
| EPS8L2  | -0.102985843 | 5.72335761 | -0.973883353 | 0.331033 | 0.37952 | -6.86926049 |
| PCDHGA  | -0.091065165 | 0.93595204 | -0.973255088 | 0.331344 | 0.37985 | -6.86986975 |
| RASL11E | -0.1118704   | 1.06761124 | -0.972482499 | 0.331728 | 0.38027 | -6.87061844 |
| PDLIM5  | -0.072382715 | 4.47212421 | -0.971683394 | 0.332124 | 0.38068 | -6.8713922  |
| NEMP1   | 0.076836762  | 3.44652232 | 0.971673408  | 0.332129 | 0.38068 | -6.87140186 |
| RGPD2   | -0.019684973 | 0.11496886 | -0.971076843 | 0.332426 | 0.38099 | -6.87197909 |

|          |              |            |              |          |         |             |
|----------|--------------|------------|--------------|----------|---------|-------------|
| WDR86    | -0.139233703 | 5.12763078 | -0.970817497 | 0.332555 | 0.38111 | -6.87222992 |
| NLRP6    | 0.033779245  | 0.18948015 | 0.970606037  | 0.33266  | 0.38121 | -6.87243438 |
| KIF3A    | -0.071667507 | 3.22836056 | -0.970557773 | 0.332684 | 0.38121 | -6.87248104 |
| ZNF124   | -0.052388837 | 1.51557424 | -0.970383296 | 0.332771 | 0.38128 | -6.87264971 |
| CSTB     | -0.062850302 | 7.74727808 | -0.969637808 | 0.333141 | 0.38168 | -6.87337002 |
| GPR34    | 0.109657501  | 2.45674679 | 0.969166589  | 0.333376 | 0.38192 | -6.87382505 |
| SKI      | -0.075867786 | 5.46031766 | -0.968417767 | 0.333749 | 0.38233 | -6.87454768 |
| TAOK1    | -0.079521917 | 3.94854036 | -0.965990868 | 0.33496  | 0.38369 | -6.8768859  |
| ARF6     | 0.074767574  | 6.52396953 | 0.965298846  | 0.335305 | 0.38406 | -6.87755156 |
| WDTC1    | -0.067645    | 6.09728136 | -0.964634834 | 0.335637 | 0.38441 | -6.87818984 |
| PCDHA6   | 0.04262134   | 0.26049801 | 0.964586926  | 0.335661 | 0.38441 | -6.87823588 |
| CDKN1A   | 0.122621764  | 7.95497906 | 0.963601984  | 0.336154 | 0.38495 | -6.8791818  |
| ASIC2    | 0.015168244  | 0.06217919 | 0.96335715   | 0.336277 | 0.38506 | -6.87941678 |
| FOXRED   | -0.082589864 | 3.07437929 | -0.963327775 | 0.336291 | 0.38506 | -6.87944497 |
| MIS18BF  | 0.076432575  | 2.89453562 | 0.96292968   | 0.336491 | 0.38526 | -6.87982692 |
| ADAMTS   | 0.113918421  | 1.99602178 | 0.962563221  | 0.336674 | 0.38544 | -6.88017837 |
| AGAP4    | -0.053924777 | 1.18391074 | -0.96224475  | 0.336834 | 0.3856  | -6.88048369 |
| RBK1     | -0.017422524 | 0.13721271 | -0.961764605 | 0.337075 | 0.38583 | -6.88094382 |
| HIPK3    | -0.079509853 | 5.51194944 | -0.96174551  | 0.337084 | 0.38583 | -6.88096212 |
| SOHLH2   | -0.040997417 | 0.30203825 | -0.961448873 | 0.337233 | 0.38598 | -6.88124627 |
| SLC17A5  | -0.01258989  | 0.04062074 | -0.96074647  | 0.337585 | 0.38636 | -6.88191876 |
| SLC1A4   | -0.075185204 | 3.21689327 | -0.960537905 | 0.33769  | 0.38645 | -6.88211835 |
| MAN1A1   | 0.113602242  | 3.91786509 | 0.960287956  | 0.337816 | 0.38657 | -6.88235749 |
| DLX1     | -0.050859695 | 0.6364103  | -0.959591871 | 0.338165 | 0.38694 | -6.88302314 |
| BMP3     | 0.025972119  | 0.13880617 | 0.957678095  | 0.339128 | 0.38802 | -6.88485076 |
| C2orf66  | -0.028449827 | 0.2421826  | -0.957364776 | 0.339286 | 0.38817 | -6.88514963 |
| PXDNL    | -0.062620029 | 0.70035696 | -0.957062071 | 0.339438 | 0.38832 | -6.88543828 |
| PLK1     | -0.063714983 | 1.28338708 | -0.955910121 | 0.340019 | 0.38896 | -6.88653593 |
| HSPE1    | -0.016012611 | 0.11134406 | -0.955452884 | 0.340249 | 0.38919 | -6.88697125 |
| ANKRD6   | -0.005476744 | 0.01518131 | -0.955405577 | 0.340273 | 0.3892  | -6.88701627 |
| NUFIP2   | -0.067811024 | 4.60371024 | -0.954440547 | 0.34076  | 0.38973 | -6.88793432 |
| MAP3K3   | 0.071558079  | 4.02417829 | 0.953942367  | 0.341012 | 0.38999 | -6.88840788 |
| CRYGN    | 0.172277373  | 4.85681986 | 0.953021546  | 0.341477 | 0.39049 | -6.88928256 |
| ALMS1    | -0.068841219 | 2.76608761 | -0.952918596 | 0.341529 | 0.39053 | -6.8893803  |
| CBARP    | 0.067141473  | 1.24223529 | 0.952822215  | 0.341578 | 0.39056 | -6.88947179 |
| ELN      | -0.12767073  | 3.52677716 | -0.952718748 | 0.34163  | 0.39059 | -6.88957    |
| SLC35G1  | -0.018717314 | 0.10388411 | -0.952353213 | 0.341815 | 0.39077 | -6.88991687 |
| ZBTB20   | 0.046083217  | 0.79622127 | 0.951936864  | 0.342026 | 0.39099 | -6.89031181 |
| CLDN12   | -0.072198491 | 4.03773371 | -0.951666372 | 0.342163 | 0.39112 | -6.89056829 |
| C6orf132 | -0.091745843 | 4.26767882 | -0.951500751 | 0.342247 | 0.39119 | -6.8907253  |

|         |              |            |              |          |         |             |
|---------|--------------|------------|--------------|----------|---------|-------------|
| ANKRD6  | -0.078685053 | 2.65837181 | -0.951372306 | 0.342312 | 0.39124 | -6.89084705 |
| MED14   | -0.075935569 | 4.16757346 | -0.950883791 | 0.342559 | 0.39149 | -6.89130995 |
| VARS    | -0.059478713 | 5.14624968 | -0.95067374  | 0.342666 | 0.39159 | -6.89150891 |
| SEC14L2 | 0.102876472  | 3.73497374 | 0.950486216  | 0.342761 | 0.39167 | -6.8916865  |
| PRKAR2  | 0.077778844  | 1.96642876 | 0.949845937  | 0.343086 | 0.39202 | -6.89229259 |
| TTPA    | -0.010389633 | 0.06312845 | -0.949521036 | 0.34325  | 0.39218 | -6.89259999 |
| PPFIA4  | 0.054418244  | 0.71139454 | 0.948618316  | 0.343709 | 0.39267 | -6.89345353 |
| FSCN3   | -0.009458734 | 0.07271911 | -0.948384198 | 0.343828 | 0.39278 | -6.89367476 |
| KIAA040 | 0.031762352  | 0.20918221 | 0.948135522  | 0.343954 | 0.3929  | -6.89390969 |
| TSPAN1  | 0.090737281  | 1.12633684 | 0.94799546   | 0.344025 | 0.39296 | -6.89404199 |
| ARHGAP  | 0.126792596  | 0.75313717 | 0.947510166  | 0.344272 | 0.39321 | -6.89450021 |
| CAMKV   | -0.024871641 | 0.11071445 | -0.947330177 | 0.344363 | 0.39329 | -6.8946701  |
| CYP3A7  | -0.016378649 | 0.2565273  | -0.947034823 | 0.344513 | 0.39343 | -6.89494881 |
| CHAF1A  | -0.062471435 | 3.23900639 | -0.946819118 | 0.344623 | 0.39353 | -6.89515231 |
| PC      | 0.113857014  | 4.7648555  | 0.94654578   | 0.344762 | 0.39367 | -6.89541011 |
| TAF1L   | 0.005695747  | 0.02286256 | 0.946075964  | 0.345001 | 0.39391 | -6.89585305 |
| SLC16A1 | -0.088561474 | 2.80109444 | -0.945623741 | 0.345231 | 0.39414 | -6.8962792  |
| CSAD    | -0.105840767 | 3.55574242 | -0.94558443  | 0.345251 | 0.39414 | -6.89631623 |
| ACSL4   | 0.090069435  | 4.67488107 | 0.945346293  | 0.345373 | 0.39425 | -6.89654054 |
| COX6A2  | 0.060478346  | 0.19041949 | 0.945317574  | 0.345387 | 0.39425 | -6.89656759 |
| CPXM2   | 0.124060035  | 2.39460988 | 0.944851407  | 0.345625 | 0.39449 | -6.89700653 |
| OTOGL   | -0.028788913 | 0.13393801 | -0.944206416 | 0.345954 | 0.39484 | -6.89761348 |
| SLC26A6 | -0.058764682 | 2.09660052 | -0.942670172 | 0.346738 | 0.39571 | -6.89905748 |
| GRIA2   | 0.030266536  | 0.08776747 | 0.94260523   | 0.346771 | 0.39572 | -6.89911847 |
| TICAM2  | -0.010073615 | 0.10151764 | -0.941900313 | 0.347131 | 0.39608 | -6.89978023 |
| ADAMTS  | 0.083170787  | 2.364066   | 0.941898082  | 0.347132 | 0.39608 | -6.89978232 |
| CHDH    | -0.07495254  | 2.14012644 | -0.94179742  | 0.347183 | 0.39611 | -6.89987678 |
| SCIN    | -0.100563771 | 0.97650354 | -0.941037507 | 0.347572 | 0.39653 | -6.90058954 |
| CD82    | -0.098704101 | 5.18026897 | -0.940689138 | 0.34775  | 0.3967  | -6.9009161  |
| USP43   | -0.077369153 | 2.07904335 | -0.940376425 | 0.34791  | 0.39686 | -6.90120914 |
| ZNRF2   | 0.086306027  | 4.76653329 | 0.939807032  | 0.348202 | 0.39717 | -6.90174245 |
| LACC1   | 0.072964456  | 2.65792089 | 0.939002993  | 0.348614 | 0.39761 | -6.902495   |
| SLC43A3 | 0.167803606  | 4.38866843 | 0.938692051  | 0.348773 | 0.39776 | -6.90278586 |
| KCNQ2   | -0.007255559 | 0.02449212 | -0.938276595 | 0.348986 | 0.39798 | -6.90317433 |
| PHC1    | -0.073233722 | 2.78988795 | -0.938021058 | 0.349117 | 0.3981  | -6.90341319 |
| JUNB    | -0.125234576 | 8.70315221 | -0.937914588 | 0.349172 | 0.39814 | -6.90351269 |
| NEURL1  | -0.090875866 | 3.45459708 | -0.93741884  | 0.349426 | 0.3984  | -6.90397583 |
| IKZF4   | 0.083419564  | 3.77323911 | 0.937286936  | 0.349494 | 0.39845 | -6.90409902 |
| RAI1    | 0.094142377  | 4.51090709 | 0.936348054  | 0.349976 | 0.39897 | -6.90497538 |
| RPL39L  | 0.103569585  | 3.17421184 | 0.936071348  | 0.350118 | 0.39911 | -6.90523349 |



|         |              |            |              |          |         |             |
|---------|--------------|------------|--------------|----------|---------|-------------|
| ERVV-2  | 0.059866959  | 0.22400124 | 0.935969551  | 0.35017  | 0.39914 | -6.90532842 |
| LRR37/- | -0.056535892 | 1.19765639 | -0.935587046 | 0.350367 | 0.39934 | -6.90568506 |
| SERPINF | -0.067546413 | 6.41378513 | -0.935095777 | 0.350619 | 0.3996  | -6.90614289 |
| ZKSCAN  | -0.074306976 | 3.90814791 | -0.933936363 | 0.351216 | 0.40025 | -6.90722245 |
| CCDC10  | -0.00501914  | 0.0200248  | -0.932971696 | 0.351713 | 0.40079 | -6.90811966 |
| FANCD2  | -0.008061807 | 0.05093291 | -0.932848933 | 0.351776 | 0.40084 | -6.90823377 |
| CKAP2L  | 0.046229299  | 0.58832167 | 0.932508372  | 0.351952 | 0.40101 | -6.90855026 |
| CDK18   | -0.055450145 | 3.9710222  | -0.931703945 | 0.352367 | 0.40146 | -6.90929736 |
| KATNAL  | 0.058713117  | 2.29933714 | 0.931277013  | 0.352587 | 0.40166 | -6.90969361 |
| RGPD4   | -0.005727223 | 0.02461736 | -0.931270471 | 0.35259  | 0.40166 | -6.90969968 |
| ARL11   | 0.092951779  | 1.26884886 | 0.930807598  | 0.352829 | 0.4019  | -6.91012907 |
| TMEM11  | 0.152865951  | 2.6839548  | 0.930635728  | 0.352918 | 0.40198 | -6.91028846 |
| FANCE   | 0.075721767  | 3.43591713 | 0.930345936  | 0.353068 | 0.40212 | -6.91055714 |
| ZNF783  | -0.056525363 | 2.81157571 | -0.930264776 | 0.35311  | 0.40214 | -6.91063237 |
| ARX     | -0.138934936 | 0.8952129  | -0.930181962 | 0.353152 | 0.40216 | -6.91070913 |
| DAO     | 0.007414706  | 0.03370605 | 0.930140505  | 0.353174 | 0.40216 | -6.91074755 |
| MKNK1   | -0.052396408 | 3.05527025 | -0.929872558 | 0.353312 | 0.40229 | -6.91099585 |
| TNFSF12 | 0.010671782  | 0.08070037 | 0.928780859  | 0.353877 | 0.40291 | -6.91200675 |
| EZH2    | 0.073875621  | 2.00684488 | 0.928593005  | 0.353974 | 0.40299 | -6.91218058 |
| HRG     | -0.014848077 | 0.06395766 | -0.928522636 | 0.35401  | 0.403   | -6.91224568 |
| DHH     | -0.050080426 | 0.80910946 | -0.928370758 | 0.354089 | 0.40307 | -6.91238619 |
| KDM7A   | 0.06881614   | 2.69657038 | 0.928250783  | 0.354151 | 0.4031  | -6.91249716 |
| MUC5B   | 0.022254921  | 0.04657894 | 0.928218805  | 0.354168 | 0.4031  | -6.91252674 |
| CX3CR1  | -0.112026471 | 2.37514475 | -0.927974781 | 0.354294 | 0.40322 | -6.91275241 |
| ZNF462  | -0.077483845 | 3.31185917 | -0.927368954 | 0.354608 | 0.40355 | -6.9133124  |
| PAXBP1  | -0.080200926 | 3.66179196 | -0.927118073 | 0.354738 | 0.40367 | -6.9135442  |
| ELP2    | -0.056230785 | 4.3944505  | -0.927043318 | 0.354776 | 0.40369 | -6.91361325 |
| C2orf72 | 0.032835424  | 0.19582553 | 0.925210534  | 0.355727 | 0.40474 | -6.91530458 |
| TCF23   | -0.011919733 | 0.06192154 | -0.92477825  | 0.355951 | 0.40497 | -6.91570302 |
| CCDC84  | -0.075341975 | 3.31653761 | -0.924331817 | 0.356183 | 0.40521 | -6.9161143  |
| SFMBT2  | 0.080325114  | 2.1559665  | 0.923972857  | 0.35637  | 0.40539 | -6.91644486 |
| MYH6    | -0.029336336 | 0.08546551 | -0.923811725 | 0.356454 | 0.40546 | -6.9165932  |
| NRXN1   | 0.009617885  | 0.0208279  | 0.922426579  | 0.357174 | 0.40623 | -6.91786731 |
| RRAS    | 0.101687827  | 7.6696161  | 0.92238287   | 0.357197 | 0.40623 | -6.91790749 |
| RPL10L  | -0.014708073 | 0.09655617 | -0.922365115 | 0.357206 | 0.40623 | -6.91792381 |
| FAM107E | 0.107106995  | 3.38573382 | 0.92176125   | 0.35752  | 0.40656 | -6.91847864 |
| IFIT1   | 0.108224475  | 4.14254769 | 0.921418037  | 0.357699 | 0.40674 | -6.91879382 |
| TMEM27  | 0.007800995  | 0.03790736 | 0.921290698  | 0.357765 | 0.40679 | -6.91891073 |
| OLFML3  | -0.145131582 | 4.2056951  | -0.920598536 | 0.358126 | 0.40717 | -6.91954592 |
| PRLR    | -0.034532306 | 0.1824672  | -0.919892723 | 0.358494 | 0.40756 | -6.92019315 |

|          |              |            |              |          |         |             |
|----------|--------------|------------|--------------|----------|---------|-------------|
| APAF1    | 0.085194684  | 2.59663443 | 0.919742806  | 0.358572 | 0.40762 | -6.92033056 |
| EDN1     | 0.10881154   | 2.35945809 | 0.918389746  | 0.359279 | 0.4084  | -6.92156973 |
| NPDC1    | 0.098702802  | 6.51353915 | 0.918231803  | 0.359361 | 0.40847 | -6.92171426 |
| RGS12    | -0.056293873 | 3.00527343 | -0.918047984 | 0.359457 | 0.40855 | -6.92188244 |
| ANOS1    | 0.09752782   | 4.29829772 | 0.917960053  | 0.359503 | 0.40857 | -6.92196288 |
| FRYL     | -0.063227547 | 2.77898225 | -0.917624394 | 0.359678 | 0.40874 | -6.92226986 |
| BOD1L1   | -0.080665381 | 3.3885097  | -0.917352738 | 0.359821 | 0.40888 | -6.92251823 |
| GREB1    | -0.110180666 | 0.76258393 | -0.916154415 | 0.360447 | 0.40956 | -6.92361295 |
| MYOF     | 0.102033102  | 6.08805878 | 0.915773413  | 0.360647 | 0.40976 | -6.92396071 |
| DCHS1    | -0.082491246 | 2.60412007 | -0.915596156 | 0.36074  | 0.40984 | -6.92412245 |
| PRRT2    | 0.089009223  | 1.51061924 | 0.913330414  | 0.361927 | 0.41116 | -6.92618717 |
| CADM1    | -0.111643702 | 5.64131261 | -0.912593872 | 0.362314 | 0.41157 | -6.92685726 |
| RBPMS    | -0.065176971 | 5.58874067 | -0.912383238 | 0.362425 | 0.41167 | -6.9270488  |
| PGPEP1   | -0.058152432 | 4.89281175 | -0.911800651 | 0.362731 | 0.41199 | -6.92757833 |
| CR2      | 0.137606199  | 0.883139   | 0.910760009  | 0.363278 | 0.41259 | -6.92852336 |
| RAB3GA   | -0.065921671 | 3.75862769 | -0.91057602  | 0.363375 | 0.41267 | -6.92869033 |
| CYP51A   | -0.0789968   | 1.85068256 | -0.910494092 | 0.363418 | 0.41269 | -6.92876467 |
| PLAGL2   | -0.081514046 | 3.60170553 | -0.910119571 | 0.363615 | 0.41289 | -6.92910442 |
| BARD1    | 0.065384333  | 2.07603585 | 0.908902976  | 0.364255 | 0.41359 | -6.93020711 |
| CAPN11   | -0.043952993 | 0.73399388 | -0.908603604 | 0.364413 | 0.41373 | -6.93047823 |
| C12orf54 | -0.044173564 | 0.66881753 | -0.908561858 | 0.364435 | 0.41373 | -6.93051603 |
| CCDC73   | -0.015865546 | 0.15751948 | -0.908454858 | 0.364492 | 0.41377 | -6.9306129  |
| DDIT4    | -0.111957143 | 6.21436944 | -0.907735995 | 0.364871 | 0.41417 | -6.93126345 |
| AGPAT2   | -0.072276809 | 7.32695542 | -0.907314012 | 0.365093 | 0.4144  | -6.93164509 |
| ZNF292   | 0.074899687  | 3.18467836 | 0.907174752  | 0.365167 | 0.41443 | -6.931771   |
| ELK1     | 0.060711143  | 4.92835564 | 0.907169171  | 0.36517  | 0.41443 | -6.93177605 |
| GDF6     | -0.163008393 | 0.62580777 | -0.906553703 | 0.365495 | 0.41477 | -6.93233228 |
| RRAD     | 0.189489059  | 3.8400589  | 0.906484031  | 0.365531 | 0.41478 | -6.93239522 |
| CLSTN1   | -0.069004598 | 7.06632326 | -0.905265416 | 0.366175 | 0.41548 | -6.93349535 |
| ADCY2    | -0.033019097 | 0.15057223 | -0.905238554 | 0.366189 | 0.41548 | -6.93351958 |
| 10-Mar   | -0.036747142 | 0.34218367 | -0.904688884 | 0.36648  | 0.41578 | -6.93401531 |
| PCDHGA   | -0.108713434 | 1.56633282 | -0.904459068 | 0.366602 | 0.41589 | -6.93422249 |
| SARDH    | -0.087353354 | 1.73716818 | -0.904120734 | 0.366781 | 0.41603 | -6.9345274  |
| MYOT     | -0.052613312 | 0.26854517 | -0.904085112 | 0.3668   | 0.41603 | -6.93455949 |
| AHSP     | -0.029271406 | 0.23869679 | -0.904080366 | 0.366802 | 0.41603 | -6.93456377 |
| UBXN10   | -0.100371745 | 3.74865293 | -0.903412294 | 0.367156 | 0.4164  | -6.93516547 |
| GPX4     | -0.062751159 | 8.93539041 | -0.902644708 | 0.367562 | 0.41684 | -6.93585627 |
| ATP1A3   | -0.07631624  | 0.38961411 | -0.902514056 | 0.367632 | 0.41689 | -6.93597379 |
| PLEKHH   | 0.075159912  | 1.4305103  | 0.902438745  | 0.367671 | 0.41691 | -6.93604152 |
| DMBT1    | 0.046979501  | 0.20883331 | 0.90217203   | 0.367813 | 0.41704 | -6.93628136 |

|         |              |            |              |          |         |             |
|---------|--------------|------------|--------------|----------|---------|-------------|
| HNRNPC  | -0.008384174 | 0.05376804 | -0.901614061 | 0.368109 | 0.41735 | -6.93678288 |
| ZNF559  | -0.041262127 | 0.67381613 | -0.901544593 | 0.368145 | 0.41736 | -6.9368453  |
| OTUD4   | 0.075063504  | 3.77321133 | 0.901368966  | 0.368239 | 0.41744 | -6.93700308 |
| SYNPO2  | 0.027567626  | 0.09718184 | 0.900073823  | 0.368926 | 0.41819 | -6.93816569 |
| RHBDL3  | -0.025020686 | 0.28821477 | -0.89933093  | 0.369321 | 0.41861 | -6.93883181 |
| NBPF26  | 0.06776176   | 1.1913269  | 0.89872342   | 0.369644 | 0.41895 | -6.93937614 |
| CACNA1  | 0.026663364  | 0.03893393 | 0.8984278    | 0.369801 | 0.4191  | -6.93964088 |
| MLC1    | -0.034259688 | 0.24645189 | -0.898296862 | 0.369871 | 0.41915 | -6.93975811 |
| FBXL20  | -0.0571493   | 3.11242471 | -0.897314953 | 0.370393 | 0.41971 | -6.9406367  |
| MYL2    | 0.073574952  | 0.13636902 | 0.897033668  | 0.370543 | 0.41985 | -6.94088821 |
| CARMIL1 | -0.074435185 | 3.41498395 | -0.896794509 | 0.37067  | 0.41997 | -6.941102   |
| CBLN3   | -0.079988112 | 2.85431916 | -0.896646565 | 0.370749 | 0.42003 | -6.94123422 |
| NODAL   | 0.032379951  | 0.15064106 | 0.895744973  | 0.37123  | 0.42055 | -6.94203951 |
| CCDC88  | 0.081525568  | 2.20612258 | 0.895448717  | 0.371388 | 0.4207  | -6.94230394 |
| SEC14L  | 0.085506006  | 1.03876391 | 0.893264976  | 0.372554 | 0.42199 | -6.94425045 |
| ATP2A1  | -0.050237828 | 0.76830653 | -0.893113843 | 0.372634 | 0.42205 | -6.94438499 |
| GCSAML  | -0.01280634  | 0.07405001 | -0.892668652 | 0.372872 | 0.42229 | -6.94478117 |
| MYL9    | -0.088093154 | 8.2798148  | -0.892599157 | 0.372909 | 0.42231 | -6.944843   |
| CALD1   | 0.07915488   | 6.15388807 | 0.892420762  | 0.373005 | 0.42239 | -6.94500169 |
| HSPB9   | -0.045700818 | 0.49851059 | -0.891962738 | 0.37325  | 0.42264 | -6.94540897 |
| MPP4    | -0.00721547  | 0.06231601 | -0.89130361  | 0.373603 | 0.42299 | -6.94599472 |
| ZNF556  | -0.006620058 | 0.05086932 | -0.891283822 | 0.373613 | 0.42299 | -6.9460123  |
| IL18BP  | -0.075380068 | 2.8876366  | -0.89091917  | 0.373808 | 0.42319 | -6.94633616 |
| KCNF1   | -0.044953742 | 0.37178683 | -0.890769966 | 0.373888 | 0.42325 | -6.94646863 |
| REXO1   | -0.051600644 | 4.01961274 | -0.890409647 | 0.374081 | 0.42344 | -6.94678846 |
| TCEAL6  | -0.062115935 | 0.27381688 | -0.890156816 | 0.374217 | 0.42356 | -6.94701281 |
| UBQLN2  | -0.081212652 | 6.00779918 | -0.890014164 | 0.374293 | 0.42362 | -6.94713936 |
| FRAS1   | 0.121611218  | 2.28917428 | 0.889741194  | 0.374439 | 0.42376 | -6.94738147 |
| NOL4L   | 0.068792263  | 3.82892492 | 0.889110923  | 0.374777 | 0.42411 | -6.94794019 |
| PCSK2   | 0.302910077  | 6.04949462 | 0.889069462  | 0.3748   | 0.42411 | -6.94797693 |
| ATP6V0  | -0.049510583 | 2.6111829  | -0.888212231 | 0.37526  | 0.4246  | -6.94873618 |
| POM121  | -0.006066855 | 0.02700557 | -0.88721535  | 0.375795 | 0.42517 | -6.94961821 |
| RAB3D   | -0.071218967 | 3.99781927 | -0.887176382 | 0.375816 | 0.42517 | -6.94965267 |
| TET2    | -0.063136396 | 2.22645056 | -0.886451518 | 0.376206 | 0.42559 | -6.95029337 |
| TMEM23  | 0.064932345  | 2.93405468 | 0.88601675   | 0.376439 | 0.42582 | -6.95067741 |
| GJC2    | -0.108161521 | 1.87254153 | -0.885901089 | 0.376502 | 0.42586 | -6.95077954 |
| CIZ1    | -0.058490272 | 5.81196203 | -0.885659334 | 0.376632 | 0.42598 | -6.95099298 |
| RASSF2  | 0.089632465  | 2.76644155 | 0.88548745   | 0.376724 | 0.42606 | -6.9511447  |
| KBTBD8  | 0.052677342  | 0.90977224 | 0.885027453  | 0.376972 | 0.42631 | -6.95155057 |
| CEP128  | -0.052287634 | 1.575325   | -0.88425047  | 0.37739  | 0.42676 | -6.95223567 |

|         |              |            |              |          |         |             |
|---------|--------------|------------|--------------|----------|---------|-------------|
| NCR1    | 0.043540184  | 0.27599461 | 0.883968254  | 0.377542 | 0.4269  | -6.95248436 |
| ICOSLG  | 0.039426836  | 0.37691077 | 0.883928727  | 0.377563 | 0.4269  | -6.95251919 |
| MFAP4   | 0.198849858  | 3.39497686 | 0.883588764  | 0.377747 | 0.42707 | -6.95281865 |
| RBPJL   | 0.010182552  | 0.04283812 | 0.882729098  | 0.37821  | 0.42757 | -6.95357539 |
| USP32   | -0.076199741 | 3.68769858 | -0.882612461 | 0.378273 | 0.42761 | -6.95367801 |
| HIST1H1 | 0.069172807  | 0.62323087 | 0.881184129  | 0.379044 | 0.42845 | -6.95493354 |
| SUSD1   | -0.089916704 | 3.4869466  | -0.880747634 | 0.37928  | 0.42869 | -6.95531683 |
| MST1    | -0.100400939 | 3.24666243 | -0.879929732 | 0.379722 | 0.42916 | -6.95603452 |
| SETSIP  | -0.021867034 | 0.26302032 | -0.879888849 | 0.379744 | 0.42916 | -6.95607038 |
| RB1CC1  | -0.065646092 | 4.47133222 | -0.879609106 | 0.379895 | 0.4293  | -6.95631568 |
| PCDHGA  | -0.085363389 | 1.28369178 | -0.879283659 | 0.380071 | 0.42947 | -6.95660097 |
| CSF3    | 0.096490646  | 0.42775055 | 0.879024761  | 0.380211 | 0.4296  | -6.95682784 |
| ABTB1   | 0.065227529  | 3.80109477 | 0.878248672  | 0.380632 | 0.43005 | -6.95750754 |
| CYP2E1  | 0.040408871  | 0.57929313 | 0.877488631  | 0.381043 | 0.43049 | -6.9581726  |
| PRKDC   | -0.086125043 | 4.46536524 | -0.876995663 | 0.381311 | 0.43076 | -6.95860365 |
| ZDHHC2  | 0.087724074  | 5.39677353 | 0.876169847  | 0.381758 | 0.43124 | -6.95932522 |
| STX16   | -0.067377294 | 5.23794454 | -0.874802288 | 0.382501 | 0.43205 | -6.96051864 |
| RHO     | -0.006557948 | 0.03850901 | -0.874608541 | 0.382606 | 0.43213 | -6.96068757 |
| VGF     | -0.13611077  | 0.81197855 | -0.874565089 | 0.38263  | 0.43213 | -6.96072545 |
| MYO1E   | 0.066029514  | 3.94506188 | 0.874478281  | 0.382677 | 0.43216 | -6.96080112 |
| EML5    | -0.035660514 | 0.40790972 | -0.872886109 | 0.383542 | 0.43311 | -6.96218772 |
| SHF     | 0.100302668  | 3.42865612 | 0.871544495  | 0.384273 | 0.43389 | -6.96335416 |
| IGSF1   | 0.286049956  | 5.9667114  | 0.871514099  | 0.384289 | 0.43389 | -6.96338057 |
| SCNN1D  | 0.084660816  | 1.8064917  | 0.871475978  | 0.38431  | 0.43389 | -6.96341368 |
| RET     | 0.136334121  | 0.94114659 | 0.871232293  | 0.384443 | 0.434   | -6.96362534 |
| GRIP2   | -0.02621738  | 0.30479616 | -0.87119323  | 0.384464 | 0.434   | -6.96365927 |
| NTF4    | -0.085613663 | 1.03663764 | -0.871141448 | 0.384492 | 0.43401 | -6.96370423 |
| GOLIM4  | -0.083008036 | 4.96398032 | -0.870471946 | 0.384857 | 0.43439 | -6.96428538 |
| MIEF2   | -0.063076377 | 4.93587997 | -0.870060834 | 0.385082 | 0.43461 | -6.96464202 |
| PIP5K1B | 0.075756608  | 1.1442878  | 0.869882254  | 0.385179 | 0.43469 | -6.96479689 |
| HAUS6   | 0.05142704   | 2.41426363 | 0.86864945   | 0.385852 | 0.43542 | -6.96586512 |
| IL33    | -0.106066465 | 2.70889957 | -0.868031125 | 0.38619  | 0.43578 | -6.96640034 |
| CEP192  | -0.071479966 | 3.02583569 | -0.867480835 | 0.38649  | 0.43609 | -6.96687635 |
| ADORA2  | -0.0135803   | 0.14364452 | -0.86729308  | 0.386593 | 0.43617 | -6.96703869 |
| STAMPB  | 0.052759109  | 1.03695215 | 0.866833601  | 0.386844 | 0.43643 | -6.96743583 |
| SACS    | -0.050635703 | 1.30099578 | -0.866387982 | 0.387088 | 0.43667 | -6.96782079 |
| CACNB1  | 0.106753637  | 2.97188581 | 0.866094123  | 0.387249 | 0.4368  | -6.96807454 |
| TRAPPC  | -0.085514325 | 2.60319012 | -0.866090076 | 0.387251 | 0.4368  | -6.96807803 |
| UPK3BL  | 0.1231384    | 1.03544328 | 0.865391157  | 0.387634 | 0.43717 | -6.96868121 |
| UPK3BL  | 0.1231384    | 1.03544328 | 0.865391157  | 0.387634 | 0.43717 | -6.96868121 |

|         |              |            |              |          |         |             |
|---------|--------------|------------|--------------|----------|---------|-------------|
| CDC25C  | -0.039053708 | 0.45480832 | -0.86465165  | 0.388039 | 0.4376  | -6.96931889 |
| XPO7    | -0.057772887 | 5.45223579 | -0.863955675 | 0.38842  | 0.438   | -6.96991853 |
| ZBTB7C  | -0.06155591  | 5.05200223 | -0.863913061 | 0.388444 | 0.438   | -6.96995523 |
| EIF2S3  | -0.059459076 | 7.03751119 | -0.863554706 | 0.38864  | 0.43819 | -6.97026378 |
| NMRK2   | 0.037579985  | 0.17380944 | 0.862562147  | 0.389185 | 0.43878 | -6.97111774 |
| GALNT1  | -0.093334661 | 5.2956316  | -0.861614885 | 0.389705 | 0.43933 | -6.97193181 |
| ALOX15  | 0.015736653  | 0.10150636 | 0.8613115    | 0.389872 | 0.43949 | -6.97219235 |
| ABRA    | 0.031273951  | 0.05105488 | 0.860559582  | 0.390285 | 0.43993 | -6.97283768 |
| CPEB1   | 0.075380516  | 1.38259834 | 0.860500921  | 0.390317 | 0.43994 | -6.97288801 |
| MARVEL  | 0.054537318  | 2.92735762 | 0.857782809  | 0.391814 | 0.44159 | -6.975216   |
| ZNF609  | -0.066117987 | 3.65288764 | -0.856148388 | 0.392716 | 0.44258 | -6.97661231 |
| SUSD3   | 0.110058188  | 3.35452849 | 0.855964939  | 0.392817 | 0.44267 | -6.97676887 |
| TRIM71  | -0.005684646 | 0.01538747 | -0.855769323 | 0.392925 | 0.44276 | -6.97693578 |
| SLC15A  | -0.00608131  | 0.03226726 | -0.855712066 | 0.392957 | 0.44276 | -6.97698462 |
| SLC16A7 | -0.049929941 | 0.68792548 | -0.85532097  | 0.393173 | 0.44298 | -6.97731818 |
| PLXDC1  | 0.080840587  | 2.24224948 | 0.854889285  | 0.393411 | 0.4432  | -6.97768618 |
| FAM83H  | -0.064059565 | 5.59255816 | -0.854873304 | 0.39342  | 0.4432  | -6.9776998  |
| S100A12 | 0.052472497  | 0.47712026 | 0.854120437  | 0.393836 | 0.44364 | -6.97834114 |
| ENPP6   | 0.017845814  | 0.15349761 | 0.852878061  | 0.394523 | 0.44438 | -6.97939826 |
| WDR44   | -0.076875973 | 3.69167818 | -0.851165406 | 0.395472 | 0.44542 | -6.98085302 |
| LAMC1   | -0.082037661 | 6.6817424  | -0.850557687 | 0.395809 | 0.44577 | -6.98136852 |
| TMEM87  | -0.06829886  | 4.75209612 | -0.850439464 | 0.395875 | 0.44582 | -6.98146877 |
| LRRRC14 | 0.013389362  | 0.0803228  | 0.850260053  | 0.395974 | 0.4459  | -6.98162086 |
| PRKCB   | -0.107821651 | 1.48278079 | -0.850027293 | 0.396103 | 0.44601 | -6.98181814 |
| TSNAX   | -0.005222049 | 0.02912728 | -0.849523584 | 0.396383 | 0.4463  | -6.98224488 |
| ITGB1   | -0.032876493 | 0.62943343 | -0.849299945 | 0.396507 | 0.44641 | -6.98243426 |
| LPXN    | 0.064771034  | 4.14995045 | 0.848571492  | 0.396912 | 0.44681 | -6.98305079 |
| GRIN1   | 0.033421795  | 0.23270935 | 0.84856398   | 0.396916 | 0.44681 | -6.98305715 |
| RBM41   | -0.064290777 | 2.38960745 | -0.848250843 | 0.39709  | 0.44698 | -6.98332201 |
| ADAMTS  | -0.044710917 | 0.50487691 | -0.847996029 | 0.397232 | 0.44711 | -6.98353747 |
| NXF3    | -0.035481727 | 0.16248257 | -0.847615281 | 0.397443 | 0.44731 | -6.98385929 |
| NTS     | -0.059319409 | 0.39879404 | -0.847409278 | 0.397558 | 0.44741 | -6.98403335 |
| NACC1   | -0.04972134  | 5.75456875 | -0.846710836 | 0.397946 | 0.44782 | -6.98462319 |
| UBR5    | -0.073023633 | 4.34430596 | -0.846533494 | 0.398045 | 0.4479  | -6.98477287 |
| CNN2    | 0.10329522   | 7.04338584 | 0.846345954  | 0.39815  | 0.44799 | -6.98493114 |
| SERPINE | 0.15829728   | 4.83273545 | 0.846041017  | 0.398319 | 0.44815 | -6.98518839 |
| KIAA093 | 0.05762393   | 3.51194784 | 0.845426368  | 0.398662 | 0.44851 | -6.98570665 |
| SPDYE1  | 0.014504645  | 0.21966452 | 0.844725529  | 0.399052 | 0.44892 | -6.98629713 |
| NECAB2  | -0.054385143 | 0.23403611 | -0.844029752 | 0.39944  | 0.44932 | -6.98688286 |
| ZNF608  | 0.100999513  | 3.73945904 | 0.843457828  | 0.399759 | 0.44965 | -6.98736397 |

|         |              |            |              |          |         |             |
|---------|--------------|------------|--------------|----------|---------|-------------|
| CBL     | 0.069602735  | 3.34749221 | 0.843384556  | 0.3998   | 0.44967 | -6.98742559 |
| HBD     | 0.026361286  | 0.12437304 | 0.842276161  | 0.400419 | 0.45032 | -6.98835697 |
| PDCD1   | 0.124333156  | 1.69848482 | 0.842248764  | 0.400434 | 0.45032 | -6.98837998 |
| CUL4B   | -0.05228249  | 4.80101329 | -0.841491667 | 0.400857 | 0.45077 | -6.98901545 |
| BRD3    | -0.075721588 | 3.95127391 | -0.841310892 | 0.400958 | 0.45085 | -6.9891671  |
| ZNF662  | -0.071004211 | 2.41723172 | -0.839749759 | 0.401832 | 0.4518  | -6.99047537 |
| TRABD2  | 0.080859954  | 0.89818663 | 0.839238341  | 0.402118 | 0.45207 | -6.99090342 |
| HABP2   | 0.009625719  | 0.03768964 | 0.839226263  | 0.402125 | 0.45207 | -6.99091353 |
| ITPKA   | -0.072850064 | 1.15458888 | -0.839007838 | 0.402247 | 0.45218 | -6.99109627 |
| ICA1L   | -0.064498211 | 2.4047047  | -0.838866165 | 0.402326 | 0.45224 | -6.99121477 |
| FAM228A | -0.05070852  | 0.42818164 | -0.838786469 | 0.402371 | 0.45226 | -6.99128142 |
| CNDP1   | -0.046148691 | 0.30392926 | -0.838620138 | 0.402464 | 0.45234 | -6.99142051 |
| DPYS    | 0.011452569  | 0.08100902 | 0.838327469  | 0.402628 | 0.45249 | -6.99166518 |
| HAO2    | -0.013953231 | 0.08595339 | -0.837781444 | 0.402934 | 0.4528  | -6.99212142 |
| TBC1D14 | -0.104393641 | 2.98783167 | -0.837313392 | 0.403197 | 0.45307 | -6.99251227 |
| OR10AD  | -0.030002332 | 0.32451592 | -0.837201569 | 0.403259 | 0.45311 | -6.99260562 |
| DLX5    | 0.098623168  | 1.4624322  | 0.835099473  | 0.40444  | 0.45441 | -6.9943581  |
| SCART1  | 0.048355669  | 0.78174125 | 0.834925274  | 0.404538 | 0.45449 | -6.99450313 |
| UBE2I   | -0.052992696 | 5.43230739 | -0.834734967 | 0.404645 | 0.45458 | -6.99466154 |
| PRND    | -0.063802452 | 0.42358243 | -0.834446425 | 0.404807 | 0.45473 | -6.99490164 |
| RSRP1   | -0.098219052 | 4.76665343 | -0.834378491 | 0.404845 | 0.45474 | -6.99495816 |
| RPLP1   | -0.06207901  | 9.67733167 | -0.834056737 | 0.405026 | 0.45491 | -6.99522578 |
| GCNT7   | -0.017551351 | 0.21860913 | -0.833540647 | 0.405316 | 0.45521 | -6.99565483 |
| PLK2    | -0.09117091  | 4.50773628 | -0.833271162 | 0.405468 | 0.45535 | -6.99587877 |
| KMT2C   | -0.071997079 | 3.99609765 | -0.832626968 | 0.405831 | 0.45573 | -6.99641377 |
| SPDYA   | 0.031380645  | 0.59404347 | 0.832576568  | 0.405859 | 0.45573 | -6.99645561 |
| KMT5C   | -0.056760158 | 2.46699615 | -0.831483509 | 0.406475 | 0.45639 | -6.99736241 |
| CCBE1   | -0.026013237 | 0.13978547 | -0.831422874 | 0.406509 | 0.4564  | -6.99741268 |
| SPON2   | 0.082084836  | 1.88843109 | 0.831328439  | 0.406562 | 0.45643 | -6.99749096 |
| HOXB2   | -0.071231297 | 1.80820013 | -0.830250426 | 0.40717  | 0.45706 | -6.99838395 |
| FMC1-LL | -0.008354105 | 0.06409971 | -0.830234319 | 0.407179 | 0.45706 | -6.99839728 |
| SPINK9  | -0.037700887 | 0.35294424 | -0.830103927 | 0.407253 | 0.45711 | -6.99850521 |
| SLC13A5 | -0.037236316 | 0.12479386 | -0.829898858 | 0.407369 | 0.45721 | -6.99867492 |
| HIVEP1  | 0.078357646  | 2.93614176 | 0.828910066  | 0.407927 | 0.45781 | -6.99949265 |
| RTBDN   | 0.046437321  | 0.26164331 | 0.828805752  | 0.407986 | 0.45784 | -6.99957886 |
| CHST1   | 0.116742937  | 4.89600849 | 0.828375233  | 0.408229 | 0.45808 | -6.99993455 |
| FGF13   | 0.062524132  | 0.67199574 | 0.828335108  | 0.408252 | 0.45808 | -6.99996769 |
| HEG1    | -0.095556891 | 6.38884706 | -0.82754841  | 0.408696 | 0.45855 | -7.00061714 |
| DEF8    | -0.058105791 | 4.87307111 | -0.827434408 | 0.408761 | 0.45859 | -7.0007112  |
| ZNF121  | -0.043469435 | 3.28235525 | -0.826945186 | 0.409038 | 0.45887 | -7.00111471 |

|         |              |            |              |          |         |             |
|---------|--------------|------------|--------------|----------|---------|-------------|
| CACNA1  | -0.047237295 | 0.98459156 | -0.826757281 | 0.409144 | 0.45896 | -7.00126963 |
| SV2B    | -0.02018104  | 0.14754738 | -0.82621416  | 0.409451 | 0.45928 | -7.00171721 |
| ZNF611  | -0.051564075 | 1.93927252 | -0.826147649 | 0.409489 | 0.45929 | -7.001772   |
| IGF1    | -0.067523883 | 0.59777479 | -0.825465354 | 0.409875 | 0.45969 | -7.00233382 |
| CLEC9A  | -0.048588839 | 0.61834692 | -0.825347467 | 0.409942 | 0.45973 | -7.00243084 |
| ZBTB43  | 0.063685825  | 3.34593713 | 0.825120945  | 0.41007  | 0.45985 | -7.00261724 |
| RGS13   | 0.033725683  | 0.14000016 | 0.824643214  | 0.410341 | 0.46012 | -7.00301018 |
| CNTRL   | 0.065849714  | 3.00677612 | 0.823945797  | 0.410737 | 0.46053 | -7.0035834  |
| SRFBP1  | -0.069089603 | 3.42336392 | -0.823428892 | 0.41103  | 0.46083 | -7.00400794 |
| A1CF    | -0.004600634 | 0.01480232 | -0.82184442  | 0.41193  | 0.46181 | -7.00530765 |
| TLR4    | -0.075593056 | 2.60013646 | -0.821494837 | 0.412128 | 0.462   | -7.00559407 |
| TP73    | 0.046804605  | 0.79835781 | 0.821455635  | 0.41215  | 0.462   | -7.00562619 |
| TYMP    | 0.108578083  | 4.73901622 | 0.821098899  | 0.412353 | 0.46219 | -7.00591833 |
| PRAME   | -0.025809906 | 0.08026648 | -0.820699815 | 0.41258  | 0.46242 | -7.006245   |
| CYP4F11 | -0.153755863 | 2.02484391 | -0.820212207 | 0.412858 | 0.4627  | -7.00664392 |
| DDA1    | -0.040308172 | 4.68913035 | -0.81910786  | 0.413486 | 0.46337 | -7.00754653 |
| SIGLEC5 | 0.020079804  | 0.24705545 | 0.818658278  | 0.413742 | 0.46361 | -7.00791364 |
| PLIN2   | 0.080431686  | 4.27785969 | 0.818642371  | 0.413751 | 0.46361 | -7.00792663 |
| NCOR2   | 0.059937465  | 5.04724041 | 0.8185173    | 0.413822 | 0.46366 | -7.00802872 |
| ANGPTL  | -0.034116366 | 0.29968369 | -0.818329733 | 0.413929 | 0.46375 | -7.00818179 |
| C2orf16 | -0.042784458 | 1.29555964 | -0.817864848 | 0.414194 | 0.46401 | -7.00856103 |
| TDO2    | 0.07647459   | 0.65480939 | 0.817140102  | 0.414608 | 0.46444 | -7.00915184 |
| NCAPG2  | -0.056186887 | 2.33235448 | -0.816824264 | 0.414788 | 0.46462 | -7.00940914 |
| FREM1   | -0.039631997 | 0.20204546 | -0.81665059  | 0.414887 | 0.4647  | -7.00955058 |
| KLHL2   | 0.066468997  | 5.11317649 | 0.816096532  | 0.415203 | 0.46502 | -7.01000162 |
| AP4E1   | -0.05595388  | 2.64892213 | -0.816044339 | 0.415233 | 0.46502 | -7.0100441  |
| SHISA7  | 0.005828854  | 0.03551694 | 0.815991801  | 0.415263 | 0.46503 | -7.01008685 |
| MPP7    | -0.090025123 | 4.5301214  | -0.81564262  | 0.415462 | 0.46522 | -7.01037091 |
| IL13RA1 | 0.071077174  | 6.45762738 | 0.815550091  | 0.415515 | 0.46525 | -7.01044617 |
| CERCAM  | -0.097975041 | 4.67361452 | -0.815061613 | 0.415794 | 0.46553 | -7.0108433  |
| ZC3H11E | -0.008315514 | 0.08101747 | -0.814885019 | 0.415895 | 0.46561 | -7.01098682 |
| SLC5A3  | -0.104771608 | 5.76456682 | -0.814816906 | 0.415934 | 0.46562 | -7.01104216 |
| SLC34A3 | -0.060221839 | 0.68905687 | -0.814733181 | 0.415982 | 0.46565 | -7.01111019 |
| PDK1    | 0.050497327  | 1.61054163 | 0.814158     | 0.41631  | 0.46598 | -7.01157732 |
| LUZP2   | 0.014784979  | 0.07168293 | 0.8140911    | 0.416349 | 0.466   | -7.01163163 |
| ZFHX4   | 0.026512712  | 0.25293249 | 0.81389031   | 0.416464 | 0.46609 | -7.01179462 |
| PCDHA2  | 0.023634169  | 0.16336668 | 0.813345128  | 0.416775 | 0.46641 | -7.01223694 |
| CNGA1   | 0.062747762  | 0.96095743 | 0.812713173  | 0.417137 | 0.46679 | -7.0127493  |
| GALNT6  | 0.084099688  | 1.88225631 | 0.812366501  | 0.417335 | 0.46698 | -7.01303019 |
| GRK2    | -0.047032795 | 5.09532691 | -0.811837487 | 0.417638 | 0.46728 | -7.0134586  |

|         |              |            |              |          |         |             |
|---------|--------------|------------|--------------|----------|---------|-------------|
| LSM11   | 0.037778844  | 1.77671267 | 0.811515104  | 0.417823 | 0.46746 | -7.01371954 |
| PHLDB3  | -0.063896299 | 2.69209542 | -0.811127383 | 0.418045 | 0.46768 | -7.01403323 |
| NDEL1   | -0.05935613  | 3.90905798 | -0.810637394 | 0.418326 | 0.46796 | -7.01442944 |
| SLC35E2 | -0.07620547  | 4.09569176 | -0.810498919 | 0.418406 | 0.46802 | -7.01454137 |
| YWHAG   | -0.058831859 | 6.29068743 | -0.810341666 | 0.418496 | 0.46809 | -7.01466846 |
| SMG6    | -0.090077361 | 3.13762096 | -0.809941861 | 0.418725 | 0.46832 | -7.01499146 |
| NPAS4   | -0.007673679 | 0.04044674 | -0.809140314 | 0.419185 | 0.4688  | -7.01563854 |
| CYB5R4  | -0.043990207 | 1.96022346 | -0.80872282  | 0.419425 | 0.46904 | -7.01597532 |
| ELOVL4  | -0.071704995 | 1.7159912  | -0.808611185 | 0.419489 | 0.46908 | -7.01606535 |
| MTUS1   | 0.088025724  | 4.81136309 | 0.8082918    | 0.419672 | 0.46925 | -7.01632284 |
| TRPV3   | 0.03649498   | 0.48735375 | 0.807773838  | 0.41997  | 0.46955 | -7.01674021 |
| GOLGA6  | 0.011704611  | 0.10851602 | 0.807724642  | 0.419998 | 0.46955 | -7.01677983 |
| FBXW7   | -0.055574947 | 3.28474184 | -0.807467038 | 0.420146 | 0.46969 | -7.0169873  |
| CC2D1B  | 0.039202533  | 4.54962624 | 0.807236141  | 0.420279 | 0.46981 | -7.0171732  |
| CHPF2   | -0.060945876 | 5.77939528 | -0.806997335 | 0.420416 | 0.46993 | -7.01736541 |
| ARL6IP6 | 0.0688284    | 3.56652147 | 0.806533746  | 0.420683 | 0.47019 | -7.01773838 |
| LRP10   | -0.075167586 | 6.50565764 | -0.805811602 | 0.421099 | 0.47063 | -7.01831895 |
| RPL14   | -0.05264184  | 7.63198245 | -0.804513559 | 0.421846 | 0.47143 | -7.0193612  |
| TMPRSS  | 0.007419259  | 0.05803122 | 0.803955272  | 0.422168 | 0.47176 | -7.01980896 |
| BEND3   | -0.051592423 | 1.85189435 | -0.80388158  | 0.422211 | 0.47178 | -7.01986804 |
| FOXP4   | -0.072779568 | 6.26691106 | -0.803721988 | 0.422303 | 0.47185 | -7.01999597 |
| TIAF1   | -0.030389654 | 0.64197349 | -0.802592441 | 0.422954 | 0.47255 | -7.02090069 |
| INSYN2A | 0.030470657  | 0.37775602 | 0.799184496  | 0.424924 | 0.47472 | -7.02362262 |
| AMY1B   | 0.010404233  | 0.05703111 | 0.799063068  | 0.424994 | 0.47476 | -7.0237194  |
| BTN3A3  | 0.079117964  | 3.44552054 | 0.798979885  | 0.425042 | 0.47479 | -7.02378568 |
| CCL3    | 0.119931435  | 2.79945144 | 0.798590332  | 0.425268 | 0.47501 | -7.024096   |
| LRRC66  | -0.047479775 | 0.36847186 | -0.797049862 | 0.42616  | 0.47594 | -7.02532169 |
| NCR3LG  | -0.063008496 | 1.05629725 | -0.797042735 | 0.426164 | 0.47594 | -7.02532736 |
| S100P   | -0.044334109 | 0.42438587 | -0.795745569 | 0.426917 | 0.47675 | -7.02635762 |
| ARPC4-T | 0.021200371  | 0.43221349 | 0.795277662  | 0.427188 | 0.47703 | -7.02672885 |
| GATAD2  | -0.056215141 | 4.29545243 | -0.795009483 | 0.427344 | 0.47717 | -7.02694151 |
| TMEM35  | -0.052844503 | 0.87015408 | -0.794545776 | 0.427613 | 0.47744 | -7.02730906 |
| SAMD11  | 0.159264951  | 3.07484009 | 0.794450718  | 0.427668 | 0.47744 | -7.02738439 |
| SPTAN1  | -0.069053791 | 6.49964075 | -0.794437166 | 0.427676 | 0.47744 | -7.02739512 |
| SPDYE5  | 0.020169552  | 0.36548244 | 0.794226667  | 0.427798 | 0.47755 | -7.02756188 |
| CDK3    | -0.047747231 | 0.88353809 | -0.793076821 | 0.428467 | 0.47825 | -7.02847201 |
| PTHLH   | -0.059864965 | 1.01921406 | -0.793052913 | 0.428481 | 0.47825 | -7.02849092 |
| EIF4EBP | -0.073792431 | 5.20703249 | -0.792731475 | 0.428668 | 0.47843 | -7.0287451  |
| MPDZ    | -0.074933457 | 3.23514933 | -0.792544908 | 0.428776 | 0.47852 | -7.02889259 |
| MATR3   | 0.039401117  | 1.05829477 | 0.79230797   | 0.428914 | 0.47864 | -7.02907984 |



|          |              |            |              |          |         |             |
|----------|--------------|------------|--------------|----------|---------|-------------|
| ADH1B    | -0.093643203 | 0.7876937  | -0.79217554  | 0.428991 | 0.47869 | -7.02918447 |
| RPS2     | 0.06156965   | 9.6411337  | 0.790122385  | 0.430187 | 0.47999 | -7.03080449 |
| NDNF     | -0.047654556 | 0.53082512 | -0.790080145 | 0.430212 | 0.47999 | -7.03083778 |
| NPIPB4   | 0.03800404   | 0.61386237 | 0.789893099  | 0.430321 | 0.48008 | -7.03098515 |
| TAF1D    | 0.052206806  | 4.03912    | 0.788633841  | 0.431055 | 0.48087 | -7.03197639 |
| LTB4R2   | -0.047076098 | 1.01743798 | -0.788437928 | 0.431169 | 0.48096 | -7.03213047 |
| DIO3     | 0.044163327  | 0.31945955 | 0.78803011   | 0.431408 | 0.4812  | -7.03245107 |
| MYH11    | -0.111234927 | 2.53044788 | -0.787934918 | 0.431463 | 0.48123 | -7.03252589 |
| NUP62    | -0.051124867 | 4.70687554 | -0.787396424 | 0.431778 | 0.48153 | -7.03294892 |
| KRTAP5   | 0.012821885  | 0.1021986  | 0.787381722  | 0.431786 | 0.48153 | -7.03296046 |
| ANO9     | -0.069792494 | 2.25149812 | -0.787108084 | 0.431946 | 0.48167 | -7.03317531 |
| EVX1     | -0.011291631 | 0.09726957 | -0.786028926 | 0.432577 | 0.48234 | -7.0340219  |
| LRR74F   | -0.007460418 | 0.02083615 | -0.785941819 | 0.432628 | 0.48237 | -7.03409019 |
| TSKS     | 0.018090588  | 0.22639695 | 0.784740718  | 0.433331 | 0.48312 | -7.03503098 |
| FABP7    | -0.01849536  | 0.06389275 | -0.780777412 | 0.435654 | 0.48568 | -7.03812518 |
| ACOXL    | -0.03670953  | 0.70524673 | -0.779601481 | 0.436345 | 0.48642 | -7.03904024 |
| PRSS57   | 0.048508944  | 0.55978951 | 0.777538846  | 0.437558 | 0.48774 | -7.04064198 |
| RPL12    | -0.061565909 | 9.94020363 | -0.777218304 | 0.437747 | 0.48792 | -7.04089052 |
| SLC24A4  | 0.01068885   | 0.13269019 | 0.777013907  | 0.437867 | 0.48802 | -7.04104895 |
| GSDMB    | 0.098588017  | 2.927481   | 0.776631663  | 0.438092 | 0.48824 | -7.04134512 |
| MC1R     | -0.069549273 | 2.13807058 | -0.775973839 | 0.43848  | 0.48864 | -7.04185448 |
| OPRK1    | -0.012326059 | 0.04244668 | -0.775576354 | 0.438714 | 0.48887 | -7.04216204 |
| BAZ2B    | -0.055793405 | 2.47337827 | -0.774448938 | 0.439379 | 0.48958 | -7.04303356 |
| PILRB    | -0.076399222 | 1.58539155 | -0.774200134 | 0.439526 | 0.48971 | -7.04322572 |
| GCOM1    | 0.00855219   | 0.05707124 | 0.773332657  | 0.440038 | 0.49025 | -7.04389523 |
| ZNF28    | -0.068481026 | 3.14644758 | -0.77296583  | 0.440255 | 0.49045 | -7.04417811 |
| SBK3     | -0.025254213 | 0.23597958 | -0.771008547 | 0.441412 | 0.49171 | -7.04568525 |
| TBX10    | -0.025481187 | 0.13489919 | -0.769361206 | 0.442388 | 0.49277 | -7.04695079 |
| HYAL4    | 0.018010407  | 0.04623577 | 0.76765085   | 0.443401 | 0.49386 | -7.04826188 |
| CHRM4    | -0.016142996 | 0.23283752 | -0.766362459 | 0.444166 | 0.49468 | -7.0492476  |
| LONRF2   | 0.135669129  | 4.86223536 | 0.766191337  | 0.444268 | 0.49476 | -7.04937839 |
| TLDC2    | -0.077878142 | 1.77726861 | -0.76510856  | 0.444911 | 0.49545 | -7.05020534 |
| C2CD6    | -0.034762394 | 0.35389708 | -0.764471414 | 0.44529  | 0.49584 | -7.0506914  |
| WDFY1    | 0.061644088  | 5.15965402 | 0.763364836  | 0.445948 | 0.49654 | -7.05153462 |
| ANKRD3   | 0.040170454  | 0.63739734 | 0.762261019  | 0.446605 | 0.49723 | -7.05237452 |
| TF       | 0.027120967  | 0.21301516 | 0.761663527  | 0.446961 | 0.4976  | -7.05282865 |
| C9orf131 | -0.007005464 | 0.05963186 | -0.760878261 | 0.447429 | 0.49809 | -7.05342497 |
| FZD7     | 0.090083249  | 3.65618713 | 0.758778941  | 0.448682 | 0.49945 | -7.05501614 |
| KIF11    | 0.056867225  | 2.20214177 | 0.758187604  | 0.449035 | 0.49981 | -7.05546355 |
| MBTPS2   | -0.061530077 | 3.10798835 | -0.757590519 | 0.449392 | 0.50017 | -7.05591496 |

|          |              |            |              |          |         |             |
|----------|--------------|------------|--------------|----------|---------|-------------|
| AP2A1    | -0.047670807 | 5.02987339 | -0.756884693 | 0.449814 | 0.50061 | -7.05644812 |
| DEFB1    | -0.130282987 | 1.87607804 | -0.756644043 | 0.449958 | 0.50074 | -7.05662979 |
| PALLD    | -0.086897254 | 5.55355847 | -0.756075593 | 0.450298 | 0.50108 | -7.05705868 |
| SAT1     | -0.06901887  | 9.89238816 | -0.755627298 | 0.450567 | 0.50135 | -7.05739669 |
| TMEM26   | 0.009519342  | 0.09758569 | 0.754419361  | 0.45129  | 0.50212 | -7.05830648 |
| GAPDHS   | -0.032812045 | 0.08918862 | -0.75400861  | 0.451536 | 0.50236 | -7.05861552 |
| FCHSD2   | -0.050533935 | 4.65751505 | -0.752861717 | 0.452224 | 0.50309 | -7.05947752 |
| SYT4     | -0.01204947  | 0.06982042 | -0.752674789 | 0.452336 | 0.50319 | -7.05961789 |
| GRIN2B   | -0.005901319 | 0.01283649 | -0.752621417 | 0.452368 | 0.50319 | -7.05965796 |
| PRPS2    | 0.060837111  | 5.27038483 | 0.752269344  | 0.45258  | 0.50339 | -7.05992223 |
| PROM1    | 0.088455528  | 0.73401493 | 0.75218584   | 0.45263  | 0.50341 | -7.05998489 |
| HOXA11   | 0.038679761  | 0.15638225 | 0.75186474   | 0.452822 | 0.50359 | -7.06022578 |
| ALOXE3   | 0.030537631  | 0.44281958 | 0.751483537  | 0.453051 | 0.50379 | -7.06051162 |
| CEL      | 0.037284397  | 0.64594264 | 0.751474913  | 0.453057 | 0.50379 | -7.06051809 |
| COCH     | -0.037480585 | 0.49356068 | -0.750253972 | 0.45379  | 0.50457 | -7.06143263 |
| DAG1     | -0.065768647 | 5.81747906 | -0.749818515 | 0.454052 | 0.50483 | -7.06175844 |
| DHX58    | -0.079513201 | 3.50027491 | -0.749705689 | 0.45412  | 0.50487 | -7.06184283 |
| NKG7     | 0.128342216  | 3.55070611 | 0.749362034  | 0.454326 | 0.50507 | -7.06209979 |
| ZNF701   | -0.041081759 | 2.14554511 | -0.748668965 | 0.454743 | 0.5055  | -7.06261766 |
| AFF4     | -0.073381749 | 5.09742101 | -0.748539218 | 0.454822 | 0.50555 | -7.06271455 |
| PATL1    | 0.058155367  | 4.8334454  | 0.748312957  | 0.454958 | 0.50567 | -7.06288348 |
| ZNFX1    | 0.058214683  | 4.84524117 | 0.747967716  | 0.455166 | 0.50587 | -7.06314115 |
| SYT6     | -0.013142911 | 0.12954647 | -0.747479655 | 0.45546  | 0.50616 | -7.06350521 |
| DNAJB1   | -0.02988673  | 0.214911   | -0.746346222 | 0.456143 | 0.50689 | -7.06434975 |
| NIPAL1   | 0.08149444   | 1.97171536 | 0.746106567  | 0.456287 | 0.50702 | -7.06452816 |
| CLDN7    | -0.076440865 | 7.79064518 | -0.746025798 | 0.456336 | 0.50704 | -7.06458827 |
| CNR1     | 0.079732165  | 0.75055169 | 0.745893015  | 0.456416 | 0.50707 | -7.06468708 |
| SYNGR2   | -0.047705701 | 6.80081578 | -0.745869658 | 0.45643  | 0.50707 | -7.06470446 |
| DOP1A    | -0.067983489 | 3.3563647  | -0.745416443 | 0.456703 | 0.50735 | -7.06504159 |
| HAGHL    | -0.078440808 | 1.80564171 | -0.745285726 | 0.456782 | 0.5074  | -7.06513879 |
| NBPF15   | 0.078359752  | 2.95758559 | 0.745240732  | 0.456809 | 0.5074  | -7.06517224 |
| ZBTB7A   | -0.040658926 | 4.98419863 | -0.745122749 | 0.45688  | 0.50744 | -7.06525995 |
| KCNH7    | -0.009255282 | 0.05545277 | -0.744957803 | 0.45698  | 0.50752 | -7.06538255 |
| HPX      | 0.028680285  | 0.42523331 | 0.744790726  | 0.457081 | 0.5076  | -7.0655067  |
| ULBP1    | -0.100113039 | 1.5106478  | -0.743191624 | 0.458047 | 0.50864 | -7.06669358 |
| C12orf76 | -0.04436096  | 3.20845809 | -0.74310994  | 0.458096 | 0.50866 | -7.06675414 |
| ZNF107   | -0.06442757  | 2.48041853 | -0.7430071   | 0.458158 | 0.50869 | -7.06683037 |
| SMCO1    | 0.012781073  | 0.04821792 | 0.742908276  | 0.458218 | 0.50873 | -7.06690362 |
| RNF207   | 0.065291538  | 2.29108878 | 0.742127323  | 0.45869  | 0.50919 | -7.06748211 |
| REC114   | -0.013444889 | 0.1188983  | -0.742118992 | 0.458695 | 0.50919 | -7.06748828 |

|         |              |            |              |          |         |             |
|---------|--------------|------------|--------------|----------|---------|-------------|
| CADM2   | -0.036969806 | 0.19439967 | -0.742013413 | 0.458759 | 0.50923 | -7.06756644 |
| PPARGC  | -0.020682094 | 0.4080291  | -0.741367964 | 0.459149 | 0.50963 | -7.06804403 |
| FBN1    | -0.124001973 | 4.21811655 | -0.741119375 | 0.4593   | 0.50976 | -7.06822786 |
| GLB1L3  | -0.09388533  | 0.79897898 | -0.741050863 | 0.459341 | 0.50977 | -7.06827851 |
| KIF20A  | 0.067906995  | 1.43217442 | 0.740885638  | 0.459441 | 0.50985 | -7.06840065 |
| MAML1   | -0.055282081 | 3.85134977 | -0.740429617 | 0.459717 | 0.51013 | -7.0687376  |
| PARP6   | -0.050384211 | 4.24509653 | -0.740232202 | 0.459837 | 0.51022 | -7.06888341 |
| KCNH8   | 0.027325613  | 0.25418462 | 0.739979263  | 0.45999  | 0.51036 | -7.06907017 |
| ZNF669  | -0.057418997 | 2.77952228 | -0.73980238  | 0.460097 | 0.51045 | -7.06920073 |
| ZNF770  | -0.121119202 | 4.57795716 | -0.739300449 | 0.460401 | 0.51075 | -7.06957106 |
| AKAP9   | -0.074160898 | 3.80849878 | -0.738837276 | 0.460682 | 0.51103 | -7.06991257 |
| ADAP2   | -0.056510933 | 2.97178784 | -0.738580518 | 0.460838 | 0.51117 | -7.0701018  |
| ISM2    | 0.035417186  | 0.39244091 | 0.738478959  | 0.460899 | 0.5112  | -7.07017662 |
| SPTA1   | -0.005184888 | 0.03322188 | -0.737914619 | 0.461242 | 0.51154 | -7.07059224 |
| UVSSA   | 0.059725802  | 2.26773738 | 0.737835558  | 0.46129  | 0.51154 | -7.07065044 |
| CRIPAK  | 0.059725802  | 2.26773738 | 0.737835558  | 0.46129  | 0.51154 | -7.07065044 |
| SMURF1  | 0.052529887  | 3.58251313 | 0.737479882  | 0.461505 | 0.51174 | -7.07091219 |
| TP53    | -0.048413424 | 5.33351757 | -0.737117377 | 0.461725 | 0.51195 | -7.07117884 |
| CDR2L   | -0.060265117 | 3.10257763 | -0.737072054 | 0.461753 | 0.51195 | -7.07121216 |
| AGRN    | 0.073945285  | 6.97268781 | 0.735347165  | 0.462801 | 0.51308 | -7.07247907 |
| ATXN7   | -0.051060285 | 3.24470852 | -0.734848856 | 0.463104 | 0.51335 | -7.07284452 |
| LOXL2   | -0.076031844 | 3.29903014 | -0.73484359  | 0.463107 | 0.51335 | -7.07284838 |
| VMO1    | 0.074914083  | 2.09535059 | 0.734389147  | 0.463383 | 0.51362 | -7.07318145 |
| STIL    | 0.032163203  | 1.02309646 | 0.734039836  | 0.463596 | 0.51382 | -7.07343732 |
| BACE1   | -0.074792622 | 4.41888285 | -0.732814615 | 0.464341 | 0.51462 | -7.07433384 |
| TEX48   | -0.014461003 | 0.101734   | -0.732625419 | 0.464457 | 0.51471 | -7.07447215 |
| PPIAL4C | -0.01201997  | 0.09615127 | -0.731825073 | 0.464944 | 0.51522 | -7.07505682 |
| KIF1B   | -0.058155635 | 3.81367853 | -0.731648447 | 0.465052 | 0.5153  | -7.07518577 |
| PCDHGC  | 0.026244701  | 0.28512414 | 0.731606074  | 0.465078 | 0.5153  | -7.0752167  |
| PNPLA6  | 0.04903401   | 5.01278666 | 0.730949494  | 0.465478 | 0.51571 | -7.07569573 |
| DCDC2   | 0.083403501  | 4.06215689 | 0.730512582  | 0.465744 | 0.51597 | -7.07601426 |
| ARMC9   | -0.048441693 | 2.84292886 | -0.729835174 | 0.466158 | 0.51637 | -7.07650774 |
| MCM10   | 0.034437352  | 0.70900516 | 0.729815241  | 0.46617  | 0.51637 | -7.07652225 |
| KIR2DL3 | 0.012168859  | 0.07781037 | 0.729211327  | 0.466538 | 0.51675 | -7.0769618  |
| ZNF385C | 0.034784446  | 0.39086266 | 0.729009282  | 0.466662 | 0.51685 | -7.07710878 |
| DOCK8   | -0.067142035 | 2.41495303 | -0.728797636 | 0.466791 | 0.51696 | -7.07726269 |
| TMPRSS  | -0.010475563 | 0.0960211  | -0.728454091 | 0.467001 | 0.51716 | -7.07751243 |
| CEP85L  | -0.037984056 | 1.29601755 | -0.728363225 | 0.467056 | 0.51719 | -7.07757847 |
| WASHC2  | -0.041939659 | 4.47135672 | -0.728216916 | 0.467146 | 0.51725 | -7.07768478 |
| TTYH1   | 0.014357179  | 0.15884257 | 0.727234924  | 0.467746 | 0.51788 | -7.07839776 |

|          |              |            |              |          |         |             |
|----------|--------------|------------|--------------|----------|---------|-------------|
| PRB3     | 0.03209742   | 0.2778824  | 0.727172929  | 0.467784 | 0.51789 | -7.07844274 |
| NLN      | 0.059186925  | 3.07502375 | 0.726919216  | 0.467939 | 0.51803 | -7.07862678 |
| KDM5A    | -0.056238021 | 3.72002097 | -0.726298436 | 0.468319 | 0.51842 | -7.07907682 |
| GAL      | 0.023871929  | 0.19018445 | 0.725048628  | 0.469084 | 0.51923 | -7.0799817  |
| XRN1     | 0.054506524  | 3.27149928 | 0.724720281  | 0.469285 | 0.51942 | -7.08021917 |
| C12orf75 | 0.078873681  | 2.24009808 | 0.72424406   | 0.469577 | 0.51971 | -7.0805634  |
| RCVRN    | -0.009498687 | 0.05619501 | -0.723917056 | 0.469777 | 0.51989 | -7.08079964 |
| VPS13B   | -0.062174667 | 2.69158598 | -0.722092912 | 0.470896 | 0.5211  | -7.08211552 |
| ANTXR2   | -0.06101418  | 2.07891409 | -0.721723857 | 0.471122 | 0.52131 | -7.08238134 |
| ATP8B2   | 0.078330616  | 3.86366207 | 0.720921414  | 0.471615 | 0.52183 | -7.08295885 |
| PLAAT3   | 0.05850679   | 6.49592041 | 0.720852487  | 0.471657 | 0.52184 | -7.08300843 |
| RALGDS   | -0.053064109 | 4.78971717 | -0.720545501 | 0.471846 | 0.52201 | -7.08322918 |
| POTEF    | 0.004770501  | 0.03295384 | 0.719970372  | 0.472199 | 0.52237 | -7.08364249 |
| CC2D1A   | -0.03662713  | 5.05828585 | -0.71953437  | 0.472468 | 0.52263 | -7.08395559 |
| TRPC1    | 0.060605081  | 2.64296844 | 0.718841477  | 0.472894 | 0.52303 | -7.0844528  |
| SMARCC   | -0.05793378  | 5.3191743  | -0.718808222 | 0.472914 | 0.52303 | -7.08447665 |
| UPK3B    | -0.060910056 | 0.6867272  | -0.718806269 | 0.472915 | 0.52303 | -7.08447805 |
| GABRR1   | -0.006388567 | 0.0422951  | -0.718611784 | 0.473035 | 0.52312 | -7.08461751 |
| CTRL     | -0.005421687 | 0.04773261 | -0.718521779 | 0.47309  | 0.52315 | -7.08468204 |
| FCAMR    | 0.048411784  | 0.19539606 | 0.718155335  | 0.473316 | 0.52337 | -7.08494468 |
| CHRNA2   | -0.011191716 | 0.07925427 | -0.717799593 | 0.473535 | 0.52357 | -7.08519953 |
| TSPAN1   | -0.144797921 | 7.36029319 | -0.717325479 | 0.473827 | 0.52386 | -7.08553897 |
| FGFR3    | 0.103947561  | 2.18448584 | 0.716840535  | 0.474125 | 0.52415 | -7.08588594 |
| SUSD6    | 0.06984403   | 5.91738332 | 0.716800293  | 0.47415  | 0.52415 | -7.08591472 |
| MTRNR2   | -0.018037805 | 0.25017057 | -0.716713399 | 0.474204 | 0.52418 | -7.08597687 |
| ARID4A   | -0.057084243 | 3.59717628 | -0.716002521 | 0.474642 | 0.52463 | -7.08648498 |
| ORM2     | -0.04455796  | 0.37737824 | -0.715945724 | 0.474677 | 0.52463 | -7.08652555 |
| SHC2     | -0.072175216 | 4.72017865 | -0.715757556 | 0.474793 | 0.52473 | -7.08665995 |
| PAQR4    | 0.065326828  | 3.02464655 | 0.715694836  | 0.474832 | 0.52473 | -7.08670474 |
| PCDHB2   | 0.101136513  | 1.68655579 | 0.715072903  | 0.475215 | 0.52512 | -7.08714867 |
| PKN1     | -0.039189842 | 6.50075889 | -0.714654897 | 0.475473 | 0.52537 | -7.08744683 |
| SLC9C2   | -0.011514466 | 0.07496483 | -0.714367611 | 0.47565  | 0.52554 | -7.08765164 |
| SEC14L4  | 0.03553942   | 0.29508865 | 0.714291233  | 0.475697 | 0.52555 | -7.08770608 |
| ZNF417   | -0.044519484 | 2.41211062 | -0.714101695 | 0.475814 | 0.52565 | -7.08784115 |
| LCT      | -0.00407633  | 0.01968913 | -0.713430326 | 0.476229 | 0.52607 | -7.08831929 |
| SIMC1    | 0.036884957  | 2.46291774 | 0.713350314  | 0.476278 | 0.52609 | -7.08837624 |
| ZMIZ1    | -0.068733787 | 5.62518242 | -0.713156033 | 0.476398 | 0.52619 | -7.08851451 |
| LENG8    | 0.085559793  | 5.99072381 | 0.712376724  | 0.47688  | 0.52669 | -7.08906874 |
| AVPR1B   | -0.030491073 | 0.43741798 | -0.711863185 | 0.477197 | 0.527   | -7.08943364 |
| USP24    | 0.04811563   | 3.82137862 | 0.711775822  | 0.477251 | 0.52703 | -7.08949569 |

|         |              |            |              |          |         |             |
|---------|--------------|------------|--------------|----------|---------|-------------|
| CRIP1   | -0.083065557 | 2.69179758 | -0.711336144 | 0.477523 | 0.5273  | -7.08980786 |
| NDFIP2  | -0.057124544 | 4.42960722 | -0.709985193 | 0.478359 | 0.52818 | -7.09076582 |
| SYMPK   | -0.037904747 | 4.98518605 | -0.709424835 | 0.478706 | 0.52853 | -7.09116263 |
| TP53TG3 | -0.004291166 | 0.01739447 | -0.709038635 | 0.478945 | 0.52873 | -7.09143594 |
| TP53TG3 | -0.004291166 | 0.01739447 | -0.709038635 | 0.478945 | 0.52873 | -7.09143594 |
| CCDC15  | 0.006891127  | 0.05441261 | 0.708864529  | 0.479053 | 0.52881 | -7.0915591  |
| PCDHGE  | -0.097790907 | 2.5339493  | -0.708621688 | 0.479203 | 0.52894 | -7.09173084 |
| GNPNAT  | -0.066923293 | 3.34721923 | -0.708578442 | 0.47923  | 0.52894 | -7.09176141 |
| PATJ    | -0.062611182 | 4.50995937 | -0.708015711 | 0.479579 | 0.52929 | -7.09215912 |
| ACSM2A  | -0.005881582 | 0.02808787 | -0.707855446 | 0.479678 | 0.52937 | -7.09227233 |
| TJP1    | -0.059685846 | 5.10476115 | -0.707771789 | 0.47973  | 0.52937 | -7.09233142 |
| ST8SIA1 | -0.046861914 | 0.52272052 | -0.707753272 | 0.479742 | 0.52937 | -7.0923445  |
| ZNF404  | -0.065075798 | 2.75401484 | -0.706010788 | 0.480823 | 0.53053 | -7.09357355 |
| SYCE1   | -0.045456519 | 0.18776497 | -0.705797433 | 0.480955 | 0.53061 | -7.09372383 |
| SDC1    | -0.077143174 | 7.02949995 | -0.705784902 | 0.480963 | 0.53061 | -7.09373265 |
| PER1    | -0.089477194 | 5.92301756 | -0.705145742 | 0.48136  | 0.53101 | -7.09418258 |
| GAS1    | -0.095544694 | 2.06319122 | -0.704971365 | 0.481468 | 0.5311  | -7.09430526 |
| ANKHD1  | 0.027667278  | 1.20399205 | 0.704689546  | 0.481643 | 0.53126 | -7.09450347 |
| FGL2    | 0.095937079  | 3.57273749 | 0.704276705  | 0.4819   | 0.53151 | -7.09479368 |
| EEF2    | -0.053304675 | 11.0606968 | -0.703193867 | 0.482573 | 0.53221 | -7.09555406 |
| TBC1D21 | 0.058206055  | 3.84746687 | 0.702517848  | 0.482994 | 0.53264 | -7.09602818 |
| KLHL21  | -0.055716173 | 4.70440049 | -0.702352806 | 0.483097 | 0.53272 | -7.09614387 |
| ZDHHC1  | 0.00966222   | 0.09855783 | 0.701735151  | 0.483481 | 0.53309 | -7.09657656 |
| LMBR1L  | 0.059331993  | 3.99127315 | 0.701718069  | 0.483492 | 0.53309 | -7.09658852 |
| DLEC1   | 0.067051617  | 1.1998236  | 0.699273636  | 0.485015 | 0.53473 | -7.09829717 |
| PCDHGA  | -0.066076521 | 0.87153237 | -0.699111078 | 0.485117 | 0.53481 | -7.09841058 |
| RLF     | -0.05300604  | 3.33199841 | -0.698877072 | 0.485263 | 0.53494 | -7.0985738  |
| HTR1B   | 0.030177518  | 0.34775273 | 0.697630883  | 0.486041 | 0.53576 | -7.09944211 |
| SMIM18  | 0.009182262  | 0.09236909 | 0.697397417  | 0.486186 | 0.53589 | -7.09960461 |
| VCL     | -0.065942273 | 5.80319352 | -0.697266973 | 0.486268 | 0.53594 | -7.09969538 |
| NOM1    | -0.037095473 | 2.77107998 | -0.697215124 | 0.4863   | 0.53594 | -7.09973145 |
| PHACTR  | 0.047317509  | 1.24507493 | 0.697164464  | 0.486332 | 0.53594 | -7.0997667  |
| SMC2    | -0.059909804 | 3.32208468 | -0.696965145 | 0.486456 | 0.53604 | -7.09990534 |
| FOXN1   | -0.031060477 | 0.34378996 | -0.69655078  | 0.486715 | 0.53629 | -7.10019344 |
| CLCA4   | -0.004859208 | 0.02723216 | -0.696475255 | 0.486763 | 0.53631 | -7.10024593 |
| PGPEP1  | -0.008706541 | 0.07851418 | -0.6963372   | 0.486849 | 0.53637 | -7.10034187 |
| EMX2    | 0.038964503  | 0.25689767 | 0.696085935  | 0.487006 | 0.53651 | -7.10051644 |
| BRWD3   | -0.05095408  | 2.23987529 | -0.695256671 | 0.487525 | 0.53702 | -7.10109211 |
| ACP4    | -0.021944486 | 0.25197747 | -0.695238035 | 0.487536 | 0.53702 | -7.10110504 |
| MORC3   | 0.056902865  | 4.05878791 | 0.694875288  | 0.487763 | 0.53724 | -7.10135664 |

|         |              |            |              |          |         |             |
|---------|--------------|------------|--------------|----------|---------|-------------|
| PKP4    | 0.058990353  | 5.75602229 | 0.693576389  | 0.488576 | 0.5381  | -7.10225647 |
| RTKN    | 0.052255722  | 4.70531845 | 0.693512425  | 0.488616 | 0.53811 | -7.10230074 |
| CHFR    | -0.032275687 | 2.15592131 | -0.693324003 | 0.488734 | 0.5382  | -7.10243112 |
| PCDHGE  | 0.065365022  | 1.23534624 | 0.692964638  | 0.488959 | 0.53842 | -7.10267969 |
| IFIH1   | 0.062583386  | 3.93310131 | 0.692643406  | 0.489161 | 0.5386  | -7.10290177 |
| TMEM41  | 0.046774995  | 3.67519669 | 0.692073352  | 0.489518 | 0.53896 | -7.10329562 |
| STAT3   | 0.056439743  | 6.1238077  | 0.691946126  | 0.489598 | 0.53902 | -7.10338348 |
| IRAK3   | -0.046459768 | 1.46487696 | -0.691648977 | 0.489784 | 0.53919 | -7.10358862 |
| GHRL    | -0.036285615 | 0.98410825 | -0.691191269 | 0.490071 | 0.53947 | -7.10390443 |
| ASB4    | 0.025500801  | 0.36545045 | 0.690912459  | 0.490246 | 0.53962 | -7.1040967  |
| GCH1    | 0.04920191   | 2.69516309 | 0.690645887  | 0.490413 | 0.53977 | -7.10428045 |
| CHSY1   | -0.060062131 | 4.06933971 | -0.690585712 | 0.490451 | 0.53978 | -7.10432192 |
| NOXA1   | -0.072955112 | 5.14900186 | -0.690273284 | 0.490647 | 0.53996 | -7.10453718 |
| ANKRD1  | 0.054193635  | 5.42360002 | 0.689194749  | 0.491324 | 0.54067 | -7.10527954 |
| ST8SIA6 | -0.03658694  | 0.52533193 | -0.689107292 | 0.491379 | 0.5407  | -7.10533968 |
| CXCR4   | 0.104354705  | 5.35529884 | 0.689046892  | 0.491417 | 0.5407  | -7.10538122 |
| CDC45   | 0.053447477  | 1.59555274 | 0.688713997  | 0.491626 | 0.5409  | -7.10561007 |
| STRN    | 0.049973104  | 3.28657224 | 0.688067744  | 0.492033 | 0.54131 | -7.10605402 |
| OAS1    | 0.085217627  | 3.21715448 | 0.687805943  | 0.492197 | 0.54146 | -7.10623375 |
| CTSG    | 0.052895026  | 0.52491089 | 0.687166458  | 0.492599 | 0.54186 | -7.10667247 |
| DPEP1   | 0.058587793  | 0.68079844 | 0.687009945  | 0.492698 | 0.54194 | -7.10677979 |
| TRARG1  | 0.019215882  | 0.0881329  | 0.686636789  | 0.492933 | 0.54216 | -7.10703555 |
| CLMP    | 0.085051004  | 1.58176621 | 0.686428716  | 0.493064 | 0.54227 | -7.10717811 |
| NTNG2   | -0.055378184 | 0.6220715  | -0.686322522 | 0.49313  | 0.54231 | -7.10725085 |
| ZNF296  | -0.045471613 | 1.51733131 | -0.685745405 | 0.493494 | 0.54267 | -7.10764595 |
| ACOT9   | 0.044256931  | 4.33799931 | 0.685341258  | 0.493748 | 0.54291 | -7.10792244 |
| USP9Y   | 0.135782222  | 0.93306886 | 0.685194283  | 0.493841 | 0.54298 | -7.10802295 |
| ARHGAP  | 0.053801409  | 1.51230584 | 0.684866785  | 0.494047 | 0.54317 | -7.10824683 |
| PLEKHA  | -0.034805138 | 1.8996381  | -0.684464694 | 0.4943   | 0.54342 | -7.10852157 |
| STRC    | 0.008942734  | 0.07766546 | 0.681717863  | 0.496033 | 0.54529 | -7.11039406 |
| DLG4    | 0.075168161  | 4.16839265 | 0.681486748  | 0.496179 | 0.54541 | -7.11055127 |
| ZBTB32  | 0.032908119  | 0.61375002 | 0.681017255  | 0.496476 | 0.5457  | -7.11087046 |
| CFP     | -0.04586097  | 1.09976431 | -0.680787159 | 0.496621 | 0.54583 | -7.11102682 |
| KCNJ3   | -0.038582994 | 0.14053293 | -0.680064095 | 0.497078 | 0.54627 | -7.11151781 |
| FSTL5   | -0.005211322 | 0.0271555  | -0.680052587 | 0.497085 | 0.54627 | -7.11152562 |
| ZNF492  | 0.01379172   | 0.23378444 | 0.679381397  | 0.49751  | 0.5467  | -7.11198091 |
| CASP8A  | 0.050641093  | 2.72171044 | 0.679054157  | 0.497716 | 0.54689 | -7.11220273 |
| PAX9    | -0.113041216 | 1.71360667 | -0.678525855 | 0.498051 | 0.54719 | -7.11256061 |
| LCTL    | 0.012981414  | 0.1555188  | 0.678522486  | 0.498053 | 0.54719 | -7.11256289 |
| LHX8    | -0.027637957 | 0.11395463 | -0.678166803 | 0.498278 | 0.5474  | -7.11280368 |

|          |              |            |              |          |         |             |
|----------|--------------|------------|--------------|----------|---------|-------------|
| KIAA082  | -0.030320175 | 0.89997318 | -0.677331544 | 0.498807 | 0.54794 | -7.11336863 |
| CIDEC    | 0.031806028  | 0.13583212 | 0.67634393   | 0.499432 | 0.5486  | -7.11403574 |
| LRRC63   | 0.009583611  | 0.09914516 | 0.676125371  | 0.499571 | 0.54871 | -7.11418324 |
| SOWAH    | 0.086214314  | 2.32203109 | 0.675792924  | 0.499782 | 0.54891 | -7.11440751 |
| SIRT1    | -0.056928435 | 4.16881254 | -0.675722354 | 0.499826 | 0.54892 | -7.1144551  |
| NEDD4L   | -0.047572477 | 3.81183088 | -0.673796525 | 0.501048 | 0.55023 | -7.11575197 |
| LGI1     | 0.004628471  | 0.02272838 | 0.673555324  | 0.501201 | 0.55036 | -7.11591414 |
| PDE6G    | 0.062480693  | 1.05289748 | 0.673423573  | 0.501285 | 0.55041 | -7.1160027  |
| SETD5    | -0.058306744 | 4.81449775 | -0.673388886 | 0.501307 | 0.55041 | -7.11602601 |
| CELF5    | 0.034459036  | 0.31544911 | 0.672719797  | 0.501732 | 0.55084 | -7.11647544 |
| MALL     | -0.111338784 | 2.91352005 | -0.672639695 | 0.501783 | 0.55086 | -7.11652922 |
| RAP2C    | -0.045497133 | 4.08875423 | -0.671739686 | 0.502355 | 0.55145 | -7.11713299 |
| TCERG1   | -0.048209567 | 3.68158927 | -0.671473936 | 0.502524 | 0.5516  | -7.11731112 |
| SCN2A    | 0.004081405  | 0.03287937 | 0.671168275  | 0.502718 | 0.55178 | -7.11751591 |
| NAGA     | -0.045268737 | 5.29102952 | -0.67103864  | 0.5028   | 0.55183 | -7.11760273 |
| IDO1     | 0.122045069  | 1.99353192 | 0.670378989  | 0.50322  | 0.55226 | -7.11804429 |
| POTEJ    | 0.003972275  | 0.02443396 | 0.669191815  | 0.503976 | 0.55305 | -7.11883787 |
| CDCA2    | 0.028535943  | 0.56682174 | 0.668706561  | 0.504285 | 0.55335 | -7.11916184 |
| MYO5B    | -0.063421003 | 4.88778716 | -0.668632551 | 0.504332 | 0.55337 | -7.11921123 |
| ARHGAP   | -0.059250999 | 2.3262807  | -0.667815493 | 0.504852 | 0.5539  | -7.11975614 |
| KIAA152  | -0.05634897  | 6.60598412 | -0.66744745  | 0.505087 | 0.55413 | -7.12000137 |
| UTP20    | -0.047580602 | 2.865615   | -0.667256741 | 0.505209 | 0.55419 | -7.12012839 |
| RBM38    | -0.05147852  | 4.50859146 | -0.667255764 | 0.505209 | 0.55419 | -7.12012904 |
| ZAR1     | -0.009582575 | 0.08124944 | -0.666382203 | 0.505766 | 0.55476 | -7.12071041 |
| THOC6    | -0.045680543 | 5.30009477 | -0.666303134 | 0.505817 | 0.55478 | -7.12076299 |
| SLC23A3  | 0.029638201  | 0.67620349 | 0.665880587  | 0.506086 | 0.55504 | -7.12104389 |
| SLAH3    | -0.010934083 | 0.03532242 | -0.665481397 | 0.506341 | 0.55529 | -7.12130911 |
| LDB1     | -0.065212631 | 6.42061575 | -0.664387641 | 0.50704  | 0.55602 | -7.12203497 |
| VSIG10L  | 0.048166125  | 1.50413114 | 0.663070206  | 0.507882 | 0.5569  | -7.12290768 |
| TMEM13   | 0.077954518  | 1.22402675 | 0.661383588  | 0.508961 | 0.55805 | -7.12402245 |
| C1orf100 | 0.016742239  | 0.31929982 | 0.660257819  | 0.509682 | 0.5588  | -7.12476494 |
| OR51E1   | -0.033771576 | 0.72570488 | -0.659711453 | 0.510032 | 0.55915 | -7.12512484 |
| SLC25A10 | 0.039719332  | 2.445987   | 0.659076346  | 0.510439 | 0.55956 | -7.12554282 |
| FAM131A  | -0.03886616  | 2.91709948 | -0.658505641 | 0.510805 | 0.55993 | -7.12591808 |
| NDOR1    | -0.043519935 | 3.7217086  | -0.658400963 | 0.510872 | 0.55996 | -7.12598687 |
| PARP12   | 0.045547204  | 4.12152612 | 0.658343306  | 0.510909 | 0.55997 | -7.12602476 |
| LRRC37   | -0.053913704 | 2.48387385 | -0.658276624 | 0.510951 | 0.55998 | -7.12606857 |
| GIT1     | -0.031815377 | 5.47115279 | -0.657640092 | 0.51136  | 0.56039 | -7.12648658 |
| TMEM15   | 0.064534359  | 1.45051013 | 0.657326395  | 0.511561 | 0.56057 | -7.12669244 |
| FCHO2    | 0.058058561  | 5.01741236 | 0.657275859  | 0.511594 | 0.56057 | -7.12672559 |

|          |              |            |              |          |         |             |
|----------|--------------|------------|--------------|----------|---------|-------------|
| PHETA2   | 0.053894432  | 3.38056761 | 0.656346438  | 0.51219  | 0.56119 | -7.12733488 |
| ANO8     | 0.051935911  | 2.91914328 | 0.656277929  | 0.512234 | 0.5612  | -7.12737976 |
| FSIP2    | 0.03574258   | 0.39959383 | 0.654992054  | 0.51306  | 0.56207 | -7.12822122 |
| C14orf13 | -0.048000401 | 1.16555819 | -0.654471377 | 0.513395 | 0.5624  | -7.12856147 |
| TRHR     | -0.049171686 | 0.40248727 | -0.653986254 | 0.513707 | 0.56271 | -7.12887825 |
| LMNB1    | 0.064238531  | 3.18701309 | 0.653869096  | 0.513783 | 0.56276 | -7.12895472 |
| SLC17A5  | 0.08285855   | 6.84097878 | 0.652877566  | 0.514421 | 0.5634  | -7.12960133 |
| CCDC19   | 0.01079085   | 0.1171705  | 0.652854065  | 0.514436 | 0.5634  | -7.12961665 |
| VCPIP1   | -0.039986132 | 3.22712144 | -0.651379447 | 0.515385 | 0.5644  | -7.13057646 |
| MSANTD   | 0.007856428  | 0.10088938 | 0.651278113  | 0.515451 | 0.56444 | -7.13064234 |
| GNL3L    | -0.072036187 | 3.01465358 | -0.651199844 | 0.515501 | 0.56446 | -7.13069321 |
| HOXB3    | 0.033052433  | 0.85275793 | 0.651145679  | 0.515536 | 0.56446 | -7.13072842 |
| CLDN20   | -0.02518481  | 0.41659368 | -0.651093651 | 0.51557  | 0.56446 | -7.13076223 |
| CCL4L2   | -0.104349946 | 2.07151998 | -0.650957958 | 0.515657 | 0.56452 | -7.1308504  |
| AMT      | 0.072149794  | 2.92992292 | 0.649507387  | 0.516592 | 0.5655  | -7.13179184 |
| KDM5D    | 0.155982458  | 1.14714289 | 0.649147613  | 0.516824 | 0.56572 | -7.13202502 |
| TPX2     | 0.067978577  | 2.2900738  | 0.647511988  | 0.51788  | 0.56684 | -7.13308346 |
| OAS2     | -0.073271293 | 3.4719287  | -0.647144099 | 0.518118 | 0.56706 | -7.13332117 |
| KRT23    | 0.014408063  | 0.08392361 | 0.647056688  | 0.518175 | 0.56709 | -7.13337762 |
| KIF15    | -0.034418033 | 0.80572179 | -0.647000453 | 0.518211 | 0.56709 | -7.13341394 |
| CHRNA6   | 0.030146732  | 0.367484   | 0.645823378  | 0.518972 | 0.56789 | -7.1341734  |
| HGS      | 0.050226313  | 4.7032193  | 0.645284614  | 0.51932  | 0.56821 | -7.13452056 |
| DNER     | -0.027791688 | 0.15638199 | -0.645271012 | 0.519329 | 0.56821 | -7.13452932 |
| NR3C2    | -0.062444926 | 4.24575013 | -0.644787411 | 0.519642 | 0.56851 | -7.13484068 |
| PARD3    | 0.055198424  | 4.45108215 | 0.643144428  | 0.520706 | 0.56964 | -7.13589676 |
| SUN3     | 0.008330868  | 0.11800138 | 0.643079084  | 0.520748 | 0.56965 | -7.1359387  |
| TAF4B    | 0.048773941  | 1.81059079 | 0.642657355  | 0.521021 | 0.56991 | -7.13620932 |
| DDX3Y    | 0.180305048  | 1.35439165 | 0.642219636  | 0.521305 | 0.57018 | -7.13649001 |
| KMT2E    | 0.056506065  | 4.8007626  | 0.642107386  | 0.521378 | 0.57023 | -7.13656196 |
| NAT8L    | -0.130791496 | 3.85896135 | -0.641064027 | 0.522054 | 0.57093 | -7.13723014 |
| ZNF727   | 0.07274373   | 1.52413618 | 0.640247334  | 0.522584 | 0.57147 | -7.1377524  |
| RUNDC3   | -0.061821799 | 2.05274297 | -0.639609401 | 0.522998 | 0.57189 | -7.13815989 |
| FABP3    | 0.10717724   | 3.96315319 | 0.639070833  | 0.523348 | 0.57223 | -7.13850359 |
| SYT7     | 0.092466046  | 2.81107007 | 0.638769106  | 0.523544 | 0.57241 | -7.13869602 |
| FAM120C  | -0.046299345 | 3.00815821 | -0.63817921  | 0.523927 | 0.57278 | -7.13907197 |
| NOTCH3   | 0.067006386  | 5.17296395 | 0.638109369  | 0.523972 | 0.57278 | -7.13911646 |
| PLS3     | 0.058227535  | 7.41941807 | 0.638091897  | 0.523984 | 0.57278 | -7.13912759 |
| NEK7     | -0.053705514 | 4.62442403 | -0.637807719 | 0.524168 | 0.57295 | -7.13930855 |
| ADARB2   | -0.034471117 | 0.15148549 | -0.63537284  | 0.525752 | 0.57464 | -7.14085577 |
| SEMA3E   | -0.097355788 | 1.46864892 | -0.635148993 | 0.525898 | 0.57476 | -7.14099772 |



|          |              |            |              |          |         |             |
|----------|--------------|------------|--------------|----------|---------|-------------|
| RASD1    | 0.116650326  | 6.70415284 | 0.634615853  | 0.526245 | 0.57508 | -7.14133559 |
| ULBP2    | 0.081201043  | 2.97593965 | 0.634595807  | 0.526258 | 0.57508 | -7.14134829 |
| RAD54L2  | -0.040138718 | 3.11118125 | -0.633889656 | 0.526718 | 0.57552 | -7.14179535 |
| EVC      | 0.074680376  | 3.4655444  | 0.633872914  | 0.526729 | 0.57552 | -7.14180595 |
| CCKBR    | 0.052955802  | 0.68931303 | 0.633201926  | 0.527167 | 0.57596 | -7.14223028 |
| SPDYE2   | 0.011435714  | 0.15720233 | 0.633111726  | 0.527225 | 0.57599 | -7.14228729 |
| TEX45    | -0.013166054 | 0.11915715 | -0.632790564 | 0.527435 | 0.57618 | -7.14249021 |
| TTLL2    | -0.003932192 | 0.02357708 | -0.632639943 | 0.527533 | 0.57623 | -7.14258534 |
| RAB11FI  | -0.044884824 | 4.27483537 | -0.632622805 | 0.527544 | 0.57623 | -7.14259616 |
| WASF2    | -0.046427652 | 6.32627997 | -0.632057409 | 0.527913 | 0.57659 | -7.14295304 |
| ZNF337   | 0.042842756  | 1.49120395 | 0.631411044  | 0.528335 | 0.57702 | -7.14336065 |
| IER5     | 0.055253348  | 4.64590024 | 0.63073759   | 0.528774 | 0.57746 | -7.14378489 |
| GLUD2    | -0.045762707 | 1.3530046  | -0.630561658 | 0.528889 | 0.57753 | -7.14389564 |
| SRPX     | -0.088485123 | 3.00066737 | -0.630541953 | 0.528902 | 0.57753 | -7.14390805 |
| CCDC15   | 0.008817072  | 0.18353353 | 0.62934559   | 0.529684 | 0.57834 | -7.14466035 |
| GHRHR    | -0.009219277 | 0.04486234 | -0.62878832  | 0.530048 | 0.5787  | -7.14501029 |
| TM6SF2   | -0.03078228  | 0.30931377 | -0.628357766 | 0.530329 | 0.57897 | -7.14528045 |
| IPO7     | -0.056014787 | 6.28639081 | -0.627422308 | 0.530941 | 0.5796  | -7.14586678 |
| DEPDC1   | -0.023912906 | 0.43965494 | -0.627212901 | 0.531078 | 0.57972 | -7.14599791 |
| LZTS1    | 0.072125627  | 2.44794447 | 0.626622285  | 0.531465 | 0.58006 | -7.14636753 |
| TPRG1    | 0.060515878  | 0.88482519 | 0.626620742  | 0.531466 | 0.58006 | -7.14636849 |
| FZD6     | 0.06865375   | 5.55783254 | 0.626519152  | 0.531532 | 0.5801  | -7.14643203 |
| KIAA201  | -0.004985801 | 0.02347236 | -0.626449686 | 0.531578 | 0.58011 | -7.14647548 |
| STK31    | -0.011230241 | 0.15716788 | -0.626083359 | 0.531818 | 0.58034 | -7.14670449 |
| KCNH2    | -0.032069933 | 0.22482145 | -0.62587289  | 0.531955 | 0.58045 | -7.14683601 |
| CAPN3    | 0.056339047  | 1.09877424 | 0.625803673  | 0.532001 | 0.58046 | -7.14687925 |
| SEC16A   | -0.043570432 | 5.23473898 | -0.624289715 | 0.532993 | 0.58151 | -7.14782389 |
| TRIP10   | 0.04662144   | 5.81805902 | 0.623959597  | 0.533209 | 0.5817  | -7.14802957 |
| RNF19B   | -0.064714816 | 5.17896588 | -0.623813516 | 0.533305 | 0.58177 | -7.14812054 |
| WNK1     | 0.052058669  | 4.85178172 | 0.623678433  | 0.533394 | 0.58183 | -7.14820465 |
| OTULIN   | -0.031424119 | 2.6807339  | -0.623419851 | 0.533563 | 0.58198 | -7.14836561 |
| RBM3     | -0.03920996  | 7.17238684 | -0.623215202 | 0.533697 | 0.58209 | -7.14849295 |
| GPRC5B   | 0.069283766  | 5.29722032 | 0.622917472  | 0.533893 | 0.58223 | -7.14867813 |
| RBBP8    | 0.055888908  | 4.5305066  | 0.622911444  | 0.533897 | 0.58223 | -7.14868188 |
| GPR132   | -0.083769408 | 2.15215907 | -0.622238933 | 0.534338 | 0.58267 | -7.14909984 |
| VWC2     | 0.015950742  | 0.04096309 | 0.622148275  | 0.534398 | 0.5827  | -7.14915615 |
| MAP7D1   | 0.044847493  | 6.05680623 | 0.621844141  | 0.534597 | 0.58288 | -7.14934499 |
| C10orf67 | -0.041287536 | 0.98986424 | -0.620964213 | 0.535175 | 0.58347 | -7.14989084 |
| CLNK     | 0.025802612  | 0.34245864 | 0.620488481  | 0.535488 | 0.58378 | -7.15018563 |
| TAGLN3   | 0.087731668  | 0.81303627 | 0.62043472   | 0.535523 | 0.58378 | -7.15021893 |

|         |              |            |              |          |         |             |
|---------|--------------|------------|--------------|----------|---------|-------------|
| PKM     | 0.051264419  | 8.03809727 | 0.620263244  | 0.535636 | 0.58386 | -7.15032512 |
| SLC12A7 | -0.045893062 | 4.97827532 | -0.619982578 | 0.53582  | 0.58403 | -7.15049887 |
| MLLT6   | -0.049293282 | 5.62822815 | -0.618942194 | 0.536504 | 0.58473 | -7.15114223 |
| NPPA    | -0.019997207 | 0.34865396 | -0.618897957 | 0.536533 | 0.58473 | -7.15116957 |
| TAT     | -0.009343862 | 0.11146664 | -0.618492469 | 0.5368   | 0.58498 | -7.15142001 |
| CCDC18  | -0.061784452 | 1.2606304  | -0.618429282 | 0.536842 | 0.58498 | -7.15145902 |
| NDE1    | 0.038017797  | 2.39039865 | 0.61838441   | 0.536871 | 0.58498 | -7.15148672 |
| FANCM   | -0.028123008 | 1.29229106 | -0.61791121  | 0.537183 | 0.58529 | -7.15177873 |
| CACNA1  | -0.04097764  | 0.35739687 | -0.617527235 | 0.537435 | 0.58552 | -7.15201551 |
| GAS6    | 0.049054606  | 7.05636582 | 0.617330091  | 0.537565 | 0.58563 | -7.15213702 |
| CYBC1   | 0.039438659  | 4.62558969 | 0.617242687  | 0.537623 | 0.58565 | -7.15219088 |
| ZNF860  | 0.063749141  | 1.68937123 | 0.617072756  | 0.537735 | 0.58574 | -7.15229558 |
| AMOTL1  | -0.057249996 | 3.83841398 | -0.616911894 | 0.537841 | 0.58582 | -7.15239466 |
| PRR22   | 0.052351577  | 2.36521054 | 0.616051154  | 0.538408 | 0.5864  | -7.15292438 |
| LRCOL1  | 0.065368454  | 0.83201376 | 0.615837015  | 0.538549 | 0.58651 | -7.15305606 |
| EZH1    | -0.040508561 | 4.77771936 | -0.615156329 | 0.538997 | 0.58696 | -7.1534743  |
| SRL     | -0.094739154 | 3.81661795 | -0.614990775 | 0.539107 | 0.58704 | -7.15357596 |
| TAX1BP3 | 0.046806242  | 5.93845312 | 0.614759008  | 0.539259 | 0.58715 | -7.15371822 |
| CRIM1   | -0.070583345 | 5.20905621 | -0.614737216 | 0.539274 | 0.58715 | -7.1537316  |
| DUSP27  | -0.017418179 | 0.17476275 | -0.614610623 | 0.539357 | 0.5872  | -7.15380928 |
| BTNL2   | -0.031441054 | 0.2091074  | -0.614455341 | 0.53946  | 0.58728 | -7.15390454 |
| IL12RB2 | -0.035887472 | 0.2785222  | -0.614202048 | 0.539627 | 0.58742 | -7.15405988 |
| GAGE10  | -0.027999768 | 0.36356466 | -0.613888233 | 0.539834 | 0.58761 | -7.15425225 |
| BMERB1  | 0.072540983  | 4.84784266 | 0.61362663   | 0.540006 | 0.58776 | -7.15441254 |
| LILRA1  | 0.022809453  | 0.52765387 | 0.612838403  | 0.540527 | 0.58829 | -7.15489509 |
| SHCBP1  | 0.040668625  | 0.99711782 | 0.612778983  | 0.540566 | 0.58829 | -7.15493144 |
| ZNF525  | -0.033344554 | 1.95283435 | -0.612585269 | 0.540694 | 0.58839 | -7.15504992 |
| NMNAT2  | -0.11045468  | 2.87311016 | -0.612542775 | 0.540722 | 0.58839 | -7.15507591 |
| FAM149F | -0.030885999 | 1.57900272 | -0.61242972  | 0.540797 | 0.58843 | -7.15514504 |
| CEP97   | -0.037007332 | 2.1252076  | -0.61190158  | 0.541145 | 0.58877 | -7.1554678  |
| SLC22A1 | -0.006110156 | 0.05650631 | -0.610694877 | 0.541943 | 0.58957 | -7.15620422 |
| BBS9    | -0.043432381 | 3.88068991 | -0.610653902 | 0.54197  | 0.58957 | -7.1562292  |
| PLS1    | -0.063310294 | 3.04327275 | -0.610634747 | 0.541983 | 0.58957 | -7.15624087 |
| FAM177E | 0.021326435  | 0.34927228 | 0.610223342  | 0.542255 | 0.58983 | -7.15649158 |
| CCDC60  | 0.009747601  | 0.11947432 | 0.609506963  | 0.542729 | 0.59031 | -7.15692775 |
| HUNK    | -0.044660328 | 0.70867418 | -0.609189495 | 0.542939 | 0.59049 | -7.15712087 |
| MGRN1   | 0.045745229  | 5.18222627 | 0.609142882  | 0.542969 | 0.59049 | -7.15714922 |
| CCDC6   | -0.045501135 | 5.01304013 | -0.608612882 | 0.54332  | 0.59084 | -7.15747139 |
| PHKA1   | -0.052702717 | 3.8442846  | -0.608416104 | 0.543451 | 0.59094 | -7.15759093 |
| LCN10   | 0.095562155  | 1.21898644 | 0.608175552  | 0.54361  | 0.59107 | -7.15773701 |

|          |              |            |              |          |         |             |
|----------|--------------|------------|--------------|----------|---------|-------------|
| ZNF623   | -0.043360651 | 3.62873234 | -0.607197578 | 0.544258 | 0.59174 | -7.15833032 |
| APOE     | 0.157281588  | 8.32898264 | 0.60715118   | 0.544288 | 0.59174 | -7.15835845 |
| REEP3    | -0.054242362 | 5.46154405 | -0.606724385 | 0.544571 | 0.59201 | -7.15861705 |
| RTP5     | 0.016926912  | 0.10134544 | 0.606465375  | 0.544743 | 0.59215 | -7.15877391 |
| GTPBP1   | 0.043006827  | 4.7476478  | 0.605839834  | 0.545157 | 0.59257 | -7.15915245 |
| ZBTB11   | -0.043166113 | 3.42532151 | -0.605016859 | 0.545703 | 0.59312 | -7.15964988 |
| TUBB2A   | -0.065617788 | 2.77292052 | -0.604636612 | 0.545956 | 0.59334 | -7.15987948 |
| USP34    | 0.077068539  | 3.42161264 | 0.604606848  | 0.545975 | 0.59334 | -7.15989745 |
| STAT6    | 0.04296696   | 6.33221934 | 0.604342324  | 0.546151 | 0.59349 | -7.16005708 |
| POF1B    | -0.056416525 | 0.5142715  | -0.604153684 | 0.546276 | 0.59359 | -7.16017088 |
| ADAMTS   | -0.107308291 | 3.85680798 | -0.603828526 | 0.546492 | 0.59379 | -7.16036695 |
| LTB4R    | -0.060007962 | 2.23977045 | -0.602995689 | 0.547045 | 0.59435 | -7.16086867 |
| CCR3     | 0.047714894  | 0.66963531 | 0.602886891  | 0.547117 | 0.59439 | -7.16093416 |
| PTPRD    | 0.096020155  | 1.7090898  | 0.601102897  | 0.548303 | 0.59564 | -7.16200635 |
| AGT      | 0.096964418  | 3.01587528 | 0.600746387  | 0.54854  | 0.59584 | -7.16222024 |
| ABCA9    | 0.030813379  | 0.466113   | 0.600728954  | 0.548552 | 0.59584 | -7.16223069 |
| KRTAP5   | -0.008056821 | 0.07681415 | -0.600472911 | 0.548722 | 0.59598 | -7.16238422 |
| NPIPA1   | -0.036213108 | 1.21624485 | -0.600063021 | 0.548995 | 0.59622 | -7.16262986 |
| CBX6     | -0.042685248 | 5.83561602 | -0.60004364  | 0.549007 | 0.59622 | -7.16264147 |
| FSTL4    | 0.056907097  | 0.87950404 | 0.599384608  | 0.549446 | 0.59666 | -7.16303606 |
| E2F8     | 0.027678323  | 0.50380578 | 0.599218419  | 0.549557 | 0.59674 | -7.1631355  |
| SLC7A14  | 0.005944916  | 0.01526297 | 0.599013191  | 0.549693 | 0.59685 | -7.16325825 |
| MYO1B    | -0.062028874 | 4.12478521 | -0.598380809 | 0.550114 | 0.59727 | -7.16363624 |
| ERV3-1   | 0.062456529  | 3.0851675  | 0.597859442  | 0.550462 | 0.59759 | -7.16394758 |
| PLAAT2   | -0.046339493 | 1.2017276  | -0.597829811 | 0.550482 | 0.59759 | -7.16396526 |
| CNOT6L   | -0.043362035 | 3.92769975 | -0.597771628 | 0.55052  | 0.59759 | -7.16399999 |
| C12orf50 | -0.00324776  | 0.01620184 | -0.597397296 | 0.55077  | 0.59782 | -7.16422332 |
| ACSM4    | -0.005140635 | 0.04371138 | -0.597331487 | 0.550814 | 0.59783 | -7.16426257 |
| ATAD2B   | -0.03985889  | 2.28517573 | -0.597260566 | 0.550861 | 0.59785 | -7.16430486 |
| HES5     | -0.028973802 | 0.48441738 | -0.596986377 | 0.551044 | 0.59801 | -7.16446832 |
| PCDHGE   | -0.049140689 | 0.89186198 | -0.596121503 | 0.55162  | 0.59859 | -7.16498343 |
| PARVA    | 0.04244267   | 4.4287762  | 0.595680799  | 0.551914 | 0.59888 | -7.16524563 |
| UTP25    | 0.041786612  | 2.88570639 | 0.594192486  | 0.552908 | 0.59991 | -7.16612966 |
| KEL      | -0.023101738 | 0.33613848 | -0.594048705 | 0.553004 | 0.59998 | -7.16621494 |
| ARFGEF   | -0.0636693   | 5.22497613 | -0.592399256 | 0.554106 | 0.60114 | -7.16719187 |
| CLEC18A  | -0.007441096 | 0.07912157 | -0.592090649 | 0.554312 | 0.60132 | -7.16737435 |
| GGH      | -0.053127487 | 2.36687322 | -0.59203978  | 0.554346 | 0.60132 | -7.16740442 |
| AGAP3    | -0.03488668  | 4.27674042 | -0.591770195 | 0.554526 | 0.60148 | -7.16756373 |
| GPR143   | -0.052773127 | 2.11476563 | -0.591651762 | 0.554605 | 0.60153 | -7.1676337  |
| SMCR8    | -0.05369117  | 3.62861    | -0.591145381 | 0.554944 | 0.60185 | -7.1679327  |

|          |              |            |              |          |         |             |
|----------|--------------|------------|--------------|----------|---------|-------------|
| ZGRF1    | -0.027315314 | 0.96204776 | -0.590820458 | 0.555162 | 0.60205 | -7.16812442 |
| CDYL     | -0.047035491 | 3.99951571 | -0.59046855  | 0.555397 | 0.60227 | -7.16833194 |
| IGLON5   | 0.023098663  | 0.12743501 | 0.590283726  | 0.555521 | 0.60236 | -7.16844088 |
| CPNE5    | 0.063797857  | 2.39032616 | 0.590116059  | 0.555633 | 0.60245 | -7.16853968 |
| RTSL1    | -0.019456529 | 0.54258011 | -0.589180821 | 0.556259 | 0.60305 | -7.16909027 |
| AGFG1    | -0.042962702 | 4.28999116 | -0.589180089 | 0.55626  | 0.60305 | -7.1690907  |
| RNF149   | -0.03608229  | 4.71462701 | -0.589089381 | 0.55632  | 0.60308 | -7.16914406 |
| GPR22    | -0.004233781 | 0.03489497 | -0.588713485 | 0.556572 | 0.60331 | -7.16936507 |
| PARD3B   | -0.049045039 | 2.92705528 | -0.587520023 | 0.557372 | 0.60414 | -7.17006586 |
| SERTM2   | 0.020368213  | 0.10493192 | 0.587186771  | 0.557595 | 0.60434 | -7.17026129 |
| PP2D1    | -0.016240768 | 0.42357513 | -0.586987617 | 0.557729 | 0.60445 | -7.17037803 |
| VPS13D   | 0.051907376  | 4.48191128 | 0.5863742    | 0.55814  | 0.60486 | -7.17073735 |
| GXYLT2   | 0.064911358  | 4.07145953 | 0.586275955  | 0.558206 | 0.60489 | -7.17079486 |
| IGF2BP1  | -0.025512129 | 0.07574354 | -0.585476975 | 0.558742 | 0.60543 | -7.17126223 |
| RAD51B   | 0.025370163  | 1.58903825 | 0.58513785   | 0.55897  | 0.60564 | -7.17146041 |
| ITLN1    | 0.027272188  | 0.39214223 | 0.584797525  | 0.559198 | 0.60585 | -7.17165918 |
| ISLR2    | -0.037171697 | 0.8046644  | -0.584665672 | 0.559287 | 0.60591 | -7.17173616 |
| PCK1     | -0.01432035  | 0.09729314 | -0.58329343  | 0.560209 | 0.60687 | -7.17253627 |
| PLEKHG   | -0.0497595   | 2.52816632 | -0.582726706 | 0.56059  | 0.60724 | -7.17286617 |
| WBP2     | 0.033810441  | 6.91443769 | 0.582350009  | 0.560843 | 0.60748 | -7.17308527 |
| SLC12A10 | 0.006775305  | 0.03141243 | 0.582196885  | 0.560946 | 0.60755 | -7.17317429 |
| SSX2IP   | -0.039530557 | 2.78993089 | -0.581392061 | 0.561487 | 0.6081  | -7.17364181 |
| SCT      | -0.075179288 | 1.31248008 | -0.580850868 | 0.561852 | 0.60845 | -7.17395582 |
| LRRC37F  | 0.033589432  | 2.1024316  | 0.580625497  | 0.562003 | 0.60858 | -7.1740865  |
| MAGEA8   | -0.005177965 | 0.04883102 | -0.580200111 | 0.56229  | 0.60885 | -7.17433302 |
| SF3B1    | -0.046601585 | 6.52174253 | -0.579556163 | 0.562723 | 0.60928 | -7.17470586 |
| DIAPH2   | 0.047323978  | 2.11967112 | 0.579279119  | 0.56291  | 0.60944 | -7.17486614 |
| SLC12A2  | -0.058398632 | 3.7551523  | -0.578526845 | 0.563417 | 0.60995 | -7.17530096 |
| ELAVL3   | -0.037097267 | 0.15140553 | -0.578020068 | 0.563758 | 0.61028 | -7.17559357 |
| SIN3B    | 0.03883288   | 4.25397582 | 0.577335494  | 0.56422  | 0.61074 | -7.17598843 |
| PIM3     | -0.044886899 | 6.07138064 | -0.576866183 | 0.564536 | 0.61105 | -7.17625886 |
| FOXI2    | -0.067252139 | 0.89349344 | -0.576160616 | 0.565012 | 0.61152 | -7.17666501 |
| CRYM     | -0.018813147 | 0.1592865  | -0.57598472  | 0.565131 | 0.61161 | -7.17676618 |
| CENPU    | 0.050875883  | 2.40705962 | 0.575765312  | 0.565279 | 0.61173 | -7.17689234 |
| ZNF850   | -0.019841284 | 0.78242672 | -0.57512339  | 0.565713 | 0.61216 | -7.17726117 |
| FLACC1   | -0.035019147 | 0.98148475 | -0.574900656 | 0.565863 | 0.61229 | -7.17738905 |
| RGS10    | 0.065590218  | 5.29706842 | 0.574571203  | 0.566085 | 0.61249 | -7.17757811 |
| ANKFY1   | 0.054981881  | 4.16084285 | 0.574226091  | 0.566319 | 0.6127  | -7.17777604 |
| C9orf72  | 0.04721938   | 3.41016059 | 0.574165155  | 0.56636  | 0.61271 | -7.17781098 |
| KMT2B    | -0.039273586 | 3.99926372 | -0.573600615 | 0.566741 | 0.61308 | -7.17813447 |

|         |              |            |              |          |         |             |
|---------|--------------|------------|--------------|----------|---------|-------------|
| AMH     | 0.042972442  | 0.63872263 | 0.573358872  | 0.566905 | 0.61322 | -7.1782729  |
| KCNV1   | 0.030531715  | 0.75685006 | 0.57313335   | 0.567057 | 0.61334 | -7.17840198 |
| TXNDC5  | -0.060397797 | 1.81288171 | -0.571399543 | 0.56823  | 0.61457 | -7.17939269 |
| ALDH8A1 | 0.013591876  | 0.26335869 | 0.57062055   | 0.568757 | 0.6151  | -7.17983684 |
| TULP2   | -0.009476883 | 0.14032338 | -0.570062049 | 0.569135 | 0.61547 | -7.1801549  |
| RASAL1  | -0.061356921 | 4.82842616 | -0.569513705 | 0.569507 | 0.61584 | -7.18046687 |
| NLRP2   | -0.124153738 | 2.07539584 | -0.569252526 | 0.569683 | 0.61599 | -7.18061536 |
| SLC25A2 | -0.071079357 | 3.19713459 | -0.569017594 | 0.569843 | 0.61612 | -7.18074887 |
| GPCPD1  | 0.045897314  | 4.81845825 | 0.568732961  | 0.570036 | 0.61629 | -7.18091055 |
| ASMT    | -0.015759883 | 0.25346758 | -0.568553538 | 0.570157 | 0.61638 | -7.18101243 |
| HCFC1R  | 0.046503671  | 7.07884315 | 0.567754729  | 0.570699 | 0.61693 | -7.1814656  |
| PSMB10  | 0.050291797  | 5.30011977 | 0.56754588   | 0.57084  | 0.61704 | -7.18158398 |
| PABPC3  | -0.020487514 | 0.44733252 | -0.567365415 | 0.570963 | 0.6171  | -7.18168623 |
| MASP2   | -0.030651853 | 0.72282206 | -0.567354688 | 0.57097  | 0.6171  | -7.18169231 |
| PCGF3   | -0.041564624 | 4.2782161  | -0.566593827 | 0.571486 | 0.61762 | -7.18212306 |
| DPEP2   | -0.041089202 | 1.59528002 | -0.56625183  | 0.571718 | 0.61783 | -7.18231649 |
| ATCAY   | -0.013802951 | 0.03125611 | -0.565890155 | 0.571964 | 0.61805 | -7.18252092 |
| CIDEA   | 0.018663405  | 0.08658808 | 0.565855647  | 0.571987 | 0.61805 | -7.18254042 |
| TMEM27  | -0.018913803 | 0.25357356 | -0.565650798 | 0.572126 | 0.61816 | -7.18265614 |
| EEA1    | -0.046120569 | 3.26361703 | -0.56544943  | 0.572263 | 0.61827 | -7.18276986 |
| STOM    | 0.052732994  | 7.2328488  | 0.565082257  | 0.572512 | 0.6185  | -7.1829771  |
| NBPF20  | -0.010070759 | 0.38994902 | -0.564913563 | 0.572627 | 0.61858 | -7.18307227 |
| R3HDM4  | 0.031878044  | 6.14710845 | 0.564782779  | 0.572716 | 0.61864 | -7.18314604 |
| PCDHGA  | -0.047365891 | 1.29054429 | -0.56423806  | 0.573086 | 0.619   | -7.18345308 |
| POLN    | -0.015703271 | 0.58874403 | -0.563808225 | 0.573378 | 0.61927 | -7.18369517 |
| PRRG4   | -0.055635509 | 4.22576664 | -0.563458037 | 0.573616 | 0.61949 | -7.18389225 |
| MYBPC1  | 0.035684683  | 0.14675084 | 0.562589369  | 0.574206 | 0.62002 | -7.18438062 |
| NTM     | -0.088411948 | 1.87594984 | -0.562565511 | 0.574223 | 0.62002 | -7.18439402 |
| ISYNA1  | 0.070531906  | 5.67646186 | 0.562564263  | 0.574224 | 0.62002 | -7.18439472 |
| NUP210  | -0.041934041 | 3.58658872 | -0.562516724 | 0.574256 | 0.62002 | -7.18442143 |
| PCDHA8  | -0.007202474 | 0.09763599 | -0.562227849 | 0.574452 | 0.6202  | -7.18458364 |
| PPT1    | -0.039003206 | 7.05583854 | -0.562119403 | 0.574526 | 0.62024 | -7.18464452 |
| SEC14L5 | -0.021840861 | 0.26587621 | -0.561828246 | 0.574724 | 0.62041 | -7.18480791 |
| TENM4   | -0.073681561 | 2.34756496 | -0.561280667 | 0.575097 | 0.62077 | -7.18511495 |
| FKBP5   | 0.074655637  | 4.35187938 | 0.560861905  | 0.575382 | 0.62104 | -7.18534957 |
| RAD23B  | 0.057267463  | 7.3358253  | 0.560369807  | 0.575717 | 0.62136 | -7.18562504 |
| SLC49A3 | 0.064276468  | 3.75242704 | 0.559382771  | 0.576389 | 0.62205 | -7.18617686 |
| NFIC    | -0.034698545 | 6.14699218 | -0.559009572 | 0.576643 | 0.62228 | -7.18638525 |
| LAMA5   | -0.05505488  | 5.67232871 | -0.558825726 | 0.576769 | 0.62238 | -7.18648786 |
| CCDC19  | 0.00735602   | 0.05502361 | 0.558776301  | 0.576802 | 0.62238 | -7.18651544 |

|         |              |            |              |          |         |             |
|---------|--------------|------------|--------------|----------|---------|-------------|
| SCN2B   | -0.076286768 | 2.04118081 | -0.55866618  | 0.576877 | 0.62242 | -7.18657688 |
| SLC39A5 | -0.015951259 | 0.36783808 | -0.557918623 | 0.577387 | 0.62293 | -7.18699363 |
| ELMSAN  | -0.045394266 | 3.29356659 | -0.557326945 | 0.577791 | 0.62332 | -7.18732309 |
| PRR19   | -0.024147794 | 1.12241767 | -0.556808783 | 0.578144 | 0.62367 | -7.18761133 |
| GALNT8  | -0.006396319 | 0.08065145 | -0.556721578 | 0.578204 | 0.62369 | -7.18765981 |
| F3      | -0.097672429 | 5.12283119 | -0.556014252 | 0.578686 | 0.62417 | -7.18805278 |
| LDHA    | 0.047623641  | 7.21167934 | 0.555457926  | 0.579066 | 0.62454 | -7.18836151 |
| STMN1   | 0.053029418  | 5.07455872 | 0.55483619   | 0.579491 | 0.62496 | -7.18870617 |
| CAPG    | 0.070983302  | 8.16038964 | 0.554255062  | 0.579888 | 0.62535 | -7.18902797 |
| FAM72B  | 0.009856076  | 0.16507162 | 0.554126142  | 0.579976 | 0.6254  | -7.18909932 |
| ADARB1  | -0.038769548 | 2.68587083 | -0.553115587 | 0.580667 | 0.62611 | -7.18965799 |
| SCG5    | 0.126757443  | 5.31651705 | 0.552600977  | 0.581018 | 0.62645 | -7.18994209 |
| DNAJC6  | 0.04181098   | 1.36189375 | 0.552308411  | 0.581219 | 0.6266  | -7.19010349 |
| CENPW   | 0.043037029  | 2.67609354 | 0.552283433  | 0.581236 | 0.6266  | -7.19011727 |
| AVL9    | 0.038318554  | 3.56690395 | 0.552150197  | 0.581327 | 0.62665 | -7.19019074 |
| SMIM6   | 0.024124235  | 0.25631668 | 0.552115846  | 0.58135  | 0.62665 | -7.19020968 |
| HCN1    | -0.004992881 | 0.02976553 | -0.55178343  | 0.581578 | 0.62685 | -7.19039289 |
| GAN     | -0.026488702 | 1.47801253 | -0.551268232 | 0.58193  | 0.62719 | -7.19067664 |
| PTN     | -0.077838001 | 3.27989921 | -0.551187784 | 0.581985 | 0.62721 | -7.19072092 |
| LGALS7  | 0.04309156   | 0.55232485 | 0.551032988  | 0.582091 | 0.62725 | -7.19080611 |
| LGALS7  | 0.04309156   | 0.55232485 | 0.551032988  | 0.582091 | 0.62725 | -7.19080611 |
| TCP11   | 0.007690486  | 0.11967479 | 0.55037957   | 0.582539 | 0.62769 | -7.19116544 |
| CDH24   | 0.043445488  | 3.23710634 | 0.550150163  | 0.582696 | 0.62782 | -7.1912915  |
| CEP295  | 0.036793115  | 2.13953871 | 0.54956579   | 0.583096 | 0.62821 | -7.19161237 |
| CHST8   | -0.01668427  | 0.28125885 | -0.548595932 | 0.58376  | 0.62888 | -7.19214416 |
| ARMC4   | 0.040098596  | 0.74968314 | 0.548548     | 0.583793 | 0.62888 | -7.19217041 |
| ELL     | -0.032699016 | 3.62211575 | -0.54711739  | 0.584774 | 0.6299  | -7.19295305 |
| ZNF221  | 0.028479532  | 0.97294929 | 0.546966284  | 0.584878 | 0.62997 | -7.1930356  |
| CRHR2   | 0.045280297  | 0.90097449 | 0.546162161  | 0.58543  | 0.6305  | -7.19347449 |
| CDC42B  | -0.047155402 | 5.57124081 | -0.546141238 | 0.585444 | 0.6305  | -7.19348591 |
| ARID3C  | -0.015758938 | 0.18225879 | -0.544635892 | 0.586478 | 0.63157 | -7.19430577 |
| RPS4Y1  | 0.24293697   | 2.27319124 | 0.543687131  | 0.58713  | 0.63223 | -7.19482133 |
| SH3GLB  | -0.03738667  | 5.52394705 | -0.543147646 | 0.5875   | 0.63259 | -7.19511409 |
| TRIM38  | -0.03714604  | 3.76336029 | -0.542537834 | 0.58792  | 0.633   | -7.19544467 |
| IFNGR1  | -0.043449538 | 6.734544   | -0.54195943  | 0.588317 | 0.63339 | -7.19575788 |
| ATM     | 0.041722561  | 2.89738129 | 0.541900243  | 0.588358 | 0.6334  | -7.19578991 |
| GNPTAB  | -0.036247645 | 4.14074425 | -0.541571698 | 0.588584 | 0.6336  | -7.19596765 |
| ITGAV   | 0.067628875  | 6.40123585 | 0.541481085  | 0.588647 | 0.63363 | -7.19601665 |
| RACGAP  | 0.040634162  | 2.30968778 | 0.540764008  | 0.58914  | 0.63408 | -7.19640415 |
| CSRNP2  | 0.040411954  | 4.36822907 | 0.540760388  | 0.589143 | 0.63408 | -7.19640611 |

|          |              |            |              |          |         |             |
|----------|--------------|------------|--------------|----------|---------|-------------|
| CGB7     | -0.01236475  | 0.14850458 | -0.540668456 | 0.589206 | 0.63411 | -7.19645575 |
| SPDYE6   | -0.016549912 | 0.50297377 | -0.540171048 | 0.589548 | 0.63443 | -7.19672419 |
| BCAS1    | -0.008786083 | 0.13323682 | -0.539999919 | 0.589666 | 0.63452 | -7.19681649 |
| FNDC9    | 0.004785216  | 0.03575624 | 0.539184658  | 0.590228 | 0.63509 | -7.1972558  |
| CAPN15   | -0.033027711 | 3.5537366  | -0.537915013 | 0.591103 | 0.63599 | -7.19793864 |
| TLX2     | -0.007877106 | 0.08743532 | -0.53643367  | 0.592124 | 0.63705 | -7.1987333  |
| RHOG     | 0.032638571  | 6.1610556  | 0.53629702   | 0.592219 | 0.63707 | -7.1988065  |
| LBR      | -0.040122021 | 3.57023267 | -0.536294096 | 0.592221 | 0.63707 | -7.19880806 |
| LEPROT   | -0.043846894 | 6.18224033 | -0.535498413 | 0.59277  | 0.63758 | -7.19923389 |
| ARHGEF   | -0.046548067 | 2.49288481 | -0.535491265 | 0.592775 | 0.63758 | -7.19923772 |
| CEP170   | 0.048687657  | 3.31882708 | 0.534600098  | 0.59339  | 0.6382  | -7.19971389 |
| ZGLP1    | -0.053864391 | 1.98811846 | -0.534398561 | 0.593529 | 0.63831 | -7.19982147 |
| KRTAP5   | 0.03234143   | 0.57108765 | 0.533948975  | 0.59384  | 0.63861 | -7.2000613  |
| SCML1    | 0.03994176   | 2.07837377 | 0.53380602   | 0.593939 | 0.63867 | -7.20013752 |
| PRR5L    | -0.037966737 | 1.54899233 | -0.533693935 | 0.594016 | 0.63872 | -7.20019727 |
| ERRFI1   | -0.081560093 | 6.24352841 | -0.533514176 | 0.59414  | 0.63881 | -7.20029306 |
| TROAP    | 0.034245434  | 0.89856279 | 0.533408758  | 0.594213 | 0.63885 | -7.20034922 |
| RHD      | -0.026601401 | 0.73380025 | -0.533102553 | 0.594425 | 0.639   | -7.20051229 |
| RBM46    | -0.022000145 | 0.12292883 | -0.533091309 | 0.594432 | 0.639   | -7.20051827 |
| MUC6     | 0.007186703  | 0.06167174 | 0.532418208  | 0.594898 | 0.63945 | -7.20087639 |
| SYNGAP   | 0.041439667  | 2.44110966 | 0.532383316  | 0.594922 | 0.63945 | -7.20089495 |
| BTG1     | -0.03882564  | 5.63323624 | -0.532167835 | 0.595071 | 0.63957 | -7.20100949 |
| TGM4     | 0.021978541  | 0.10364906 | 0.532066084  | 0.595141 | 0.6396  | -7.20106356 |
| POLR2J2  | -0.017080044 | 0.21396441 | -0.53082091  | 0.596003 | 0.64049 | -7.20172442 |
| KCNT1    | -0.021957952 | 0.07671535 | -0.530650287 | 0.596121 | 0.64057 | -7.20181486 |
| ZNF215   | 0.03746284   | 1.52731613 | 0.5297903    | 0.596716 | 0.64117 | -7.20227024 |
| ADGRE5   | 0.063451143  | 5.35853092 | 0.529211556  | 0.597117 | 0.64156 | -7.20257628 |
| SPATA2   | -0.003208736 | 0.02067823 | -0.528971656 | 0.597283 | 0.6417  | -7.20270304 |
| CILP2    | 0.063261714  | 2.5269519  | 0.528722435  | 0.597456 | 0.64184 | -7.20283467 |
| CD3EAP   | 0.025972072  | 2.11888437 | 0.527131293  | 0.598559 | 0.64299 | -7.20367357 |
| DNMT1    | 0.042955373  | 4.07221009 | 0.526242791  | 0.599175 | 0.64361 | -7.20414092 |
| UNC5C    | 0.069083986  | 3.95092577 | 0.525826132  | 0.599464 | 0.64388 | -7.20435981 |
| PNLDC1   | 0.043843585  | 0.2041495  | 0.525766781  | 0.599505 | 0.64388 | -7.20439098 |
| TLX1     | 0.017894616  | 0.07738098 | 0.524916517  | 0.600095 | 0.64448 | -7.20483708 |
| C1orf115 | -0.075503533 | 6.51936085 | -0.524629266 | 0.600295 | 0.64465 | -7.20498762 |
| SMARCC   | 0.054885581  | 4.95211325 | 0.524139943  | 0.600634 | 0.64497 | -7.20524388 |
| FAM24B   | 0.041218665  | 1.87771787 | 0.52262549   | 0.601686 | 0.64606 | -7.2060355  |
| AURKC    | 0.046365609  | 1.59488093 | 0.522264297  | 0.601938 | 0.64627 | -7.20622396 |
| ATP1B3   | -0.04507009  | 6.44108603 | -0.52224404  | 0.601952 | 0.64627 | -7.20623452 |
| PLEKHM   | 0.034756167  | 3.86348429 | 0.521984863  | 0.602132 | 0.64642 | -7.20636967 |

|         |              |            |              |          |         |             |
|---------|--------------|------------|--------------|----------|---------|-------------|
| MS4A12  | -0.036369681 | 0.52050066 | -0.52181166  | 0.602252 | 0.64651 | -7.20645995 |
| POTEE   | 0.002868864  | 0.01943693 | 0.52147409   | 0.602487 | 0.64672 | -7.20663581 |
| MALT1   | 0.033595472  | 3.21369193 | 0.520825472  | 0.602938 | 0.64716 | -7.2069734  |
| MAST4   | 0.037379717  | 3.02825879 | 0.520573176  | 0.603114 | 0.64731 | -7.20710461 |
| FUT11   | -0.032978563 | 3.66703172 | -0.520465881 | 0.603188 | 0.64735 | -7.20716038 |
| XKR5    | 0.011560333  | 0.20301921 | 0.520409006  | 0.603228 | 0.64735 | -7.20718995 |
| SVEP1   | 0.045076476  | 0.84161871 | 0.520117552  | 0.603431 | 0.64753 | -7.20734138 |
| CELA2B  | -0.017760619 | 0.38169209 | -0.518883429 | 0.60429  | 0.64841 | -7.20798169 |
| LPCAT4  | 0.038216101  | 3.88858539 | 0.518442502  | 0.604597 | 0.64869 | -7.20821009 |
| TFAP4   | 0.03379557   | 2.50265541 | 0.518156797  | 0.604796 | 0.64887 | -7.20835799 |
| SOX5    | -0.024577812 | 0.60677354 | -0.517853089 | 0.605008 | 0.64905 | -7.20851511 |
| BLNK    | -0.049013375 | 4.51591372 | -0.517682495 | 0.605126 | 0.64914 | -7.20860332 |
| CMKLR1  | 0.056612768  | 2.3971955  | 0.51744792   | 0.60529  | 0.64927 | -7.20872458 |
| ARHGAP  | -0.037783848 | 3.56220006 | -0.515704065 | 0.606506 | 0.65051 | -7.20962427 |
| OTUD7B  | 0.03760274   | 3.48011767 | 0.515683217  | 0.60652  | 0.65051 | -7.20963501 |
| KCTD13  | -0.028150163 | 3.25606104 | -0.515126079 | 0.606909 | 0.65089 | -7.2099218  |
| FAM89A  | 0.041565759  | 3.1990515  | 0.514781957  | 0.607149 | 0.6511  | -7.21009878 |
| HSPB2   | -0.043147093 | 1.88054175 | -0.513060601 | 0.608351 | 0.65235 | -7.21098231 |
| ACPP    | -0.049200001 | 2.08975777 | -0.5126294   | 0.608652 | 0.65263 | -7.21120318 |
| SLC1A6  | -0.003304822 | 0.01911584 | -0.512256751 | 0.608913 | 0.65287 | -7.2113939  |
| CDHR1   | 0.02576546   | 0.24262622 | 0.51213883   | 0.608995 | 0.65289 | -7.21145422 |
| CATSPE  | -0.007851298 | 0.11248172 | -0.512127029 | 0.609003 | 0.65289 | -7.21146026 |
| SLC25A4 | -0.032733103 | 0.49415795 | -0.511580212 | 0.609385 | 0.65325 | -7.2117398  |
| ADAM32  | -0.00584991  | 0.13072652 | -0.511220471 | 0.609637 | 0.65348 | -7.21192354 |
| CHGA    | 0.019224591  | 0.07767144 | 0.51031144   | 0.610273 | 0.65412 | -7.21238727 |
| ONECUT  | 0.002645545  | 0.01266856 | 0.509858223  | 0.61059  | 0.65442 | -7.21261816 |
| FOXL2   | -0.007018842 | 0.06845305 | -0.509757126 | 0.61066  | 0.65444 | -7.21266964 |
| TCOF1   | -0.023680096 | 3.75536373 | -0.509728696 | 0.61068  | 0.65444 | -7.21268411 |
| SHH     | -0.032902737 | 0.18950115 | -0.509550916 | 0.610805 | 0.65453 | -7.2127746  |
| C5      | 0.030875957  | 1.7897481  | 0.509342038  | 0.610951 | 0.65462 | -7.21288088 |
| POU3F1  | -0.03969072  | 0.53730782 | -0.509313003 | 0.610971 | 0.65462 | -7.21289565 |
| NPHS1   | 0.013899935  | 0.06661248 | 0.509175729  | 0.611067 | 0.65468 | -7.21296547 |
| SLC2A1  | 0.048632097  | 4.6491945  | 0.508062465  | 0.611847 | 0.65548 | -7.213531   |
| SLC25A2 | -0.009135194 | 0.11576769 | -0.507986211 | 0.6119   | 0.65549 | -7.21356969 |
| CENPM   | -0.046459075 | 2.20913337 | -0.507555688 | 0.612202 | 0.65578 | -7.21378803 |
| CHRNA   | 0.005161874  | 0.04990222 | 0.507116332  | 0.612509 | 0.65606 | -7.21401066 |
| CNTF    | -0.029599512 | 0.62442008 | -0.506760722 | 0.612759 | 0.65629 | -7.21419071 |
| PIDD1   | -0.041336323 | 3.36300786 | -0.50619868  | 0.613152 | 0.65667 | -7.21447502 |
| DDC     | -0.007558173 | 0.06754367 | -0.505889589 | 0.613369 | 0.65686 | -7.21463124 |
| C4orf54 | -0.008748105 | 0.03750522 | -0.505809254 | 0.613425 | 0.65688 | -7.21467183 |



|        |              |            |              |          |         |             |
|--------|--------------|------------|--------------|----------|---------|-------------|
| PACS2  | -0.025189316 | 4.21967444 | -0.505478706 | 0.613657 | 0.65709 | -7.21483877 |
| CYP2C9 | 0.005314937  | 0.04276941 | 0.505334304  | 0.613758 | 0.65715 | -7.21491166 |
| ANXA13 | 0.005779     | 0.03155479 | 0.505175757  | 0.61387  | 0.65723 | -7.21499167 |
| CABP7  | -0.03778174  | 0.41527723 | -0.504919342 | 0.614049 | 0.65738 | -7.21512101 |
| ZCCHC2 | -0.033113985 | 2.74063069 | -0.504432987 | 0.614391 | 0.65771 | -7.21536616 |
| KRT14  | -0.072552751 | 1.05824488 | -0.503692778 | 0.61491  | 0.65822 | -7.21573882 |
| CCND2  | -0.058293059 | 7.13399173 | -0.503252213 | 0.615219 | 0.65851 | -7.21596037 |
| SPECC1 | -0.003078243 | 0.03261959 | -0.503058286 | 0.615355 | 0.65861 | -7.21605782 |
| MDM4   | -0.037622341 | 3.42829337 | -0.502649166 | 0.615643 | 0.65885 | -7.2162633  |
| GK5    | 0.044703572  | 2.78540221 | 0.502626237  | 0.615659 | 0.65885 | -7.21627481 |
| CD79B  | -0.067676739 | 2.55391892 | -0.502141456 | 0.615999 | 0.65918 | -7.21651806 |
| GAD1   | 0.014520493  | 0.10638612 | 0.501142657  | 0.616701 | 0.65989 | -7.2170185  |
| NAP1L1 | -0.03231273  | 5.95218881 | -0.50024913  | 0.617329 | 0.66052 | -7.21746535 |
| HELB   | -0.021405466 | 1.04519065 | -0.500012568 | 0.617495 | 0.66065 | -7.21758352 |
| PDGFC  | -0.053246696 | 4.70303344 | -0.499334751 | 0.617972 | 0.66112 | -7.2179218  |
| LHX2   | -0.066278218 | 0.30049112 | -0.499136259 | 0.618112 | 0.66122 | -7.21802077 |
| PLEKHM | -0.050432602 | 1.652652   | -0.499063228 | 0.618163 | 0.66122 | -7.21805718 |
| DIP2A  | -0.031326193 | 3.00020846 | -0.499043562 | 0.618177 | 0.66122 | -7.21806698 |
| FNIP2  | 0.041817733  | 3.41113666 | 0.497497832  | 0.619265 | 0.66231 | -7.21883626 |
| GSK3B  | -0.033482356 | 4.78787759 | -0.497485393 | 0.619273 | 0.66231 | -7.21884244 |
| HECTD2 | 0.034674247  | 2.11503884 | 0.497288326  | 0.619412 | 0.66241 | -7.21894034 |
| APBB3  | -0.041994035 | 3.80923776 | -0.496845239 | 0.619724 | 0.6627  | -7.21916032 |
| ADAM15 | -0.035970807 | 5.64254319 | -0.496706021 | 0.619822 | 0.66277 | -7.2192294  |
| TMEM14 | -0.037390655 | 3.94505643 | -0.496120407 | 0.620235 | 0.66317 | -7.21951976 |
| HOXC4  | 0.034002424  | 0.54268444 | 0.495872168  | 0.62041  | 0.66331 | -7.21964274 |
| CD151  | 0.047868942  | 7.81805071 | 0.495005727  | 0.62102  | 0.6639  | -7.2200715  |
| HAMP   | -0.035471819 | 0.6799192  | -0.494979921 | 0.621038 | 0.6639  | -7.22008426 |
| BNC2   | 0.057848643  | 1.1644338  | 0.493659493  | 0.62197  | 0.66484 | -7.2207362  |
| TNFRSF | 0.026603882  | 1.01364861 | 0.493621223  | 0.621997 | 0.66484 | -7.22075507 |
| ENAM   | 0.004552868  | 0.03903922 | 0.493457109  | 0.622112 | 0.6649  | -7.22083598 |
| DNAH14 | 0.019270466  | 1.07007635 | 0.493424344  | 0.622135 | 0.6649  | -7.22085212 |
| PRC1   | 0.036084576  | 2.09392316 | 0.492389677  | 0.622866 | 0.66564 | -7.22136152 |
| MAS1   | 0.002498315  | 0.00901985 | 0.492276189  | 0.622946 | 0.66569 | -7.22141733 |
| HSPA4L | -0.043216261 | 1.54494372 | -0.491711691 | 0.623344 | 0.66607 | -7.22169473 |
| CDK17  | -0.034147516 | 3.62587161 | -0.491620667 | 0.623408 | 0.6661  | -7.22173943 |
| SLF1   | 0.021228701  | 1.72780141 | 0.491378307  | 0.62358  | 0.66624 | -7.22185842 |
| GBP1   | 0.067357213  | 4.76274321 | 0.491071182  | 0.623796 | 0.66643 | -7.22200911 |
| LARGE1 | 0.037524828  | 2.60968696 | 0.490868474  | 0.62394  | 0.66654 | -7.22210851 |
| ETV1   | 0.067283056  | 3.76997142 | 0.490679566  | 0.624073 | 0.66664 | -7.22220112 |
| HGSNAT | 0.036939227  | 5.51223466 | 0.49024599   | 0.624379 | 0.66692 | -7.22241352 |

|          |              |            |              |          |         |             |
|----------|--------------|------------|--------------|----------|---------|-------------|
| NKTR     | 0.049257532  | 3.73250936 | 0.48970864   | 0.624759 | 0.66729 | -7.22267651 |
| PIWIL4   | 0.020735709  | 0.98419863 | 0.489443426  | 0.624947 | 0.66745 | -7.2228062  |
| ANKRD1   | -0.034348765 | 3.7673578  | -0.488915318 | 0.62532  | 0.6678  | -7.22306424 |
| TBC1D2   | -0.002952377 | 0.02049513 | -0.488789664 | 0.625409 | 0.66786 | -7.22312559 |
| NAPRT    | -0.054740584 | 5.25400449 | -0.488378396 | 0.6257   | 0.66812 | -7.2233263  |
| OXR1     | -0.048896773 | 4.12541458 | -0.488282088 | 0.625768 | 0.66816 | -7.22337328 |
| ZNF587   | 0.033627838  | 2.67865537 | 0.486846263  | 0.626783 | 0.6692  | -7.22407253 |
| ATP1A4   | -0.006021867 | 0.06078639 | -0.48651588  | 0.627017 | 0.66941 | -7.22423313 |
| CD8B2    | 0.032437903  | 0.20480282 | 0.486053286  | 0.627345 | 0.66971 | -7.22445783 |
| LGALS9   | 0.005704684  | 0.03460166 | 0.485974813  | 0.6274   | 0.66973 | -7.22449592 |
| TMEM24   | 0.077721587  | 1.86144666 | 0.485331237  | 0.627856 | 0.67017 | -7.22480812 |
| VWC2L    | -0.002884745 | 0.02791209 | -0.485229193 | 0.627928 | 0.67021 | -7.22485758 |
| MAPK7    | -0.029031033 | 3.73855918 | -0.485171281 | 0.627969 | 0.67021 | -7.22488565 |
| ALKAL1   | -0.057901002 | 2.9025544  | -0.484956476 | 0.628122 | 0.67033 | -7.22498973 |
| GAB1     | -0.035023583 | 2.70499488 | -0.484816431 | 0.628221 | 0.67039 | -7.22505755 |
| MEX3B    | -0.028224649 | 1.03276128 | -0.484589341 | 0.628382 | 0.67052 | -7.2251675  |
| WDR55    | -0.025454467 | 3.52696587 | -0.484417598 | 0.628503 | 0.67061 | -7.22525062 |
| CD72     | -0.040378146 | 1.80147913 | -0.484072155 | 0.628748 | 0.67083 | -7.2254177  |
| SDS      | -0.052931636 | 1.39861045 | -0.483616359 | 0.629071 | 0.67113 | -7.22563799 |
| DCST2    | 0.03448181   | 1.25653265 | 0.482970949  | 0.629529 | 0.67158 | -7.22594956 |
| C14orf39 | 0.00559347   | 0.06521615 | 0.482820475  | 0.629635 | 0.67165 | -7.22602214 |
| CEP350   | -0.038421895 | 3.40478311 | -0.482687832 | 0.62973  | 0.67171 | -7.2260861  |
| HTR2B    | 0.037417844  | 1.08927953 | 0.481529298  | 0.630551 | 0.67254 | -7.226644   |
| GJB2     | 0.063959913  | 2.54199714 | 0.48101027   | 0.63092  | 0.67289 | -7.22689352 |
| FAM72D   | -0.006782835 | 0.12338078 | -0.480836227 | 0.631043 | 0.67298 | -7.22697712 |
| CCND3    | -0.03402333  | 6.18300598 | -0.480404858 | 0.631349 | 0.67327 | -7.22718421 |
| TAS2R5   | -0.005339821 | 0.0605756  | -0.48031055  | 0.631416 | 0.6733  | -7.22722946 |
| MN1      | -0.046568247 | 1.64575922 | -0.480138402 | 0.631539 | 0.67338 | -7.22731204 |
| RPS6KA   | -0.04798014  | 4.91465397 | -0.47976276  | 0.631805 | 0.67363 | -7.22749213 |
| C1QTNF   | 0.036449651  | 0.75806476 | 0.479549098  | 0.631957 | 0.67375 | -7.2275945  |
| MYADM    | -0.068273323 | 6.52560914 | -0.479407554 | 0.632058 | 0.67381 | -7.22766229 |
| FGF16    | -0.014501043 | 0.13866531 | -0.479079377 | 0.632291 | 0.67402 | -7.22781939 |
| CYP3A4   | 0.006573655  | 0.0706536  | 0.47878067   | 0.632503 | 0.6742  | -7.22796229 |
| PCDHA1   | 0.021844108  | 0.38440363 | 0.478219549  | 0.632902 | 0.67458 | -7.22823048 |
| TRRAP    | -0.040969147 | 4.43857498 | -0.477933497 | 0.633105 | 0.67476 | -7.22836709 |
| DHCR24   | -0.068616847 | 5.05972034 | -0.476350863 | 0.63423  | 0.67591 | -7.22912139 |
| CDCA5    | -0.032378091 | 1.53479103 | -0.476247675 | 0.634304 | 0.67595 | -7.22917048 |
| HIST1H2  | -0.031562774 | 0.45291434 | -0.475721689 | 0.634678 | 0.67631 | -7.22942057 |
| GLMP     | -0.035219378 | 5.04789653 | -0.4755765   | 0.634781 | 0.67635 | -7.22948955 |
| PCDHGE   | -0.041406205 | 0.79647584 | -0.475550633 | 0.6348   | 0.67635 | -7.22950184 |

|          |              |            |              |          |         |             |
|----------|--------------|------------|--------------|----------|---------|-------------|
| TP53AIP  | -0.006898346 | 0.06767527 | -0.474983904 | 0.635203 | 0.67674 | -7.22977089 |
| GPC6     | 0.071840284  | 1.6165311  | 0.474639081  | 0.635449 | 0.67696 | -7.22993443 |
| SLCO2B   | 0.051682097  | 3.20706521 | 0.474494579  | 0.635551 | 0.67702 | -7.23000293 |
| CABP4    | 0.01954744   | 0.44325681 | 0.474290961  | 0.635696 | 0.67714 | -7.23009942 |
| BRD4     | -0.026470658 | 4.46367003 | -0.473991138 | 0.63591  | 0.67732 | -7.23024142 |
| OBSCN    | 0.038923404  | 2.82255425 | 0.473268015  | 0.636425 | 0.67783 | -7.23058354 |
| POGK     | 0.033280695  | 4.32989369 | 0.472815676  | 0.636747 | 0.67813 | -7.23079728 |
| PTCHD1   | 0.012084704  | 0.12703027 | 0.471687564  | 0.637551 | 0.67891 | -7.23132945 |
| GIGYF1   | -0.035074769 | 5.09518145 | -0.47167459  | 0.63756  | 0.67891 | -7.23133556 |
| SLC38A5  | -0.089910344 | 5.49236372 | -0.471357321 | 0.637787 | 0.67911 | -7.231485   |
| CAMK1G   | -0.04113644  | 0.55260401 | -0.470989166 | 0.638049 | 0.67934 | -7.23165827 |
| TEX15    | -0.002580949 | 0.01080819 | -0.470703849 | 0.638253 | 0.67952 | -7.23179246 |
| CCL8     | -0.053771938 | 1.59074486 | -0.47063172  | 0.638304 | 0.67953 | -7.23182638 |
| TOGARA   | -0.006676599 | 0.11953365 | -0.46967159  | 0.638989 | 0.68022 | -7.23227729 |
| FAM117E  | -0.039340308 | 3.23845109 | -0.469466573 | 0.639135 | 0.68033 | -7.23237346 |
| HOXD4    | 0.007066667  | 0.15085802 | 0.469408075  | 0.639177 | 0.68033 | -7.23240089 |
| DNAH2    | 0.011981381  | 0.20279658 | 0.469014453  | 0.639458 | 0.68059 | -7.23258538 |
| KIAA2021 | -0.036005692 | 3.80178089 | -0.468503863 | 0.639823 | 0.68093 | -7.23282447 |
| DLX6     | -0.038176364 | 0.31963266 | -0.468118865 | 0.640098 | 0.68118 | -7.23300457 |
| CYP2W1   | 0.048397272  | 0.55582279 | 0.465148312  | 0.64222  | 0.6834  | -7.23438924 |
| GABRA2   | 0.00258146   | 0.01143097 | 0.46486689   | 0.642422 | 0.68357 | -7.23451997 |
| LSMEM2   | -0.008317789 | 0.1254013  | -0.464654428 | 0.642574 | 0.68364 | -7.2346186  |
| PACS1    | 0.031666436  | 5.82652144 | 0.464624592  | 0.642595 | 0.68364 | -7.23463245 |
| SLC1A7   | 0.013265057  | 0.17920402 | 0.464606961  | 0.642607 | 0.68364 | -7.23464063 |
| C6orf201 | -0.006978083 | 0.17048798 | -0.464480705 | 0.642698 | 0.68369 | -7.23469922 |
| MRGPRE   | 0.058656941  | 1.56677143 | 0.464182629  | 0.642911 | 0.68388 | -7.23483748 |
| ANKRD2   | -0.023462155 | 0.63176743 | -0.463082448 | 0.643698 | 0.68467 | -7.23534702 |
| TIMD4    | -0.046681022 | 1.16373955 | -0.462768343 | 0.643923 | 0.68487 | -7.23549227 |
| FADS1    | -0.028935357 | 2.22917863 | -0.462262433 | 0.644285 | 0.68521 | -7.23572602 |
| ZNF490   | 0.02112562   | 0.77879312 | 0.46220331   | 0.644328 | 0.68521 | -7.23575332 |
| PRRC2A   | -0.032497917 | 6.51749614 | -0.461856069 | 0.644576 | 0.68543 | -7.23591358 |
| HEPH     | -0.052544947 | 2.0703967  | -0.461549276 | 0.644796 | 0.68562 | -7.23605508 |
| PLCXD2   | 0.028290046  | 0.61676528 | 0.461352149  | 0.644937 | 0.68573 | -7.23614595 |
| ZBTB39   | -0.033054582 | 2.43225778 | -0.461093005 | 0.645123 | 0.68589 | -7.23626535 |
| SPNS1    | -0.024231598 | 1.17081752 | -0.459976426 | 0.645923 | 0.68669 | -7.23677903 |
| TMEM23   | -0.080002554 | 4.85158744 | -0.459346022 | 0.646375 | 0.68713 | -7.2370685  |
| SFRP5    | 0.030497563  | 0.21020789 | 0.459236987  | 0.646453 | 0.68717 | -7.23711852 |
| GATAD2   | 0.027586314  | 5.18130572 | 0.458869137  | 0.646717 | 0.68741 | -7.23728721 |
| C6       | 0.018236037  | 0.18518406 | 0.458334094  | 0.647101 | 0.68777 | -7.23753232 |
| KAT6A    | 0.037672958  | 3.93018845 | 0.456389007  | 0.648497 | 0.68921 | -7.23842101 |

|         |              |            |              |          |         |             |
|---------|--------------|------------|--------------|----------|---------|-------------|
| ADGB    | -0.003455571 | 0.0216128  | -0.455328378 | 0.649259 | 0.68998 | -7.238904   |
| TAS2R3C | 0.003814695  | 0.04017347 | 0.455088619  | 0.649431 | 0.69012 | -7.23901303 |
| GNAI2   | -0.030728861 | 7.04377671 | -0.454410069 | 0.649918 | 0.69059 | -7.23932128 |
| DUSP10  | -0.045114153 | 3.34188757 | -0.454009986 | 0.650206 | 0.69086 | -7.23950282 |
| HOXC5   | 0.009170411  | 0.04765374 | 0.45382838   | 0.650337 | 0.69095 | -7.23958517 |
| PLIN4   | 0.039015005  | 0.84514008 | 0.453305671  | 0.650712 | 0.69131 | -7.23982201 |
| GLIPR2  | 0.049200963  | 4.46648857 | 0.452809471  | 0.651069 | 0.69164 | -7.24004658 |
| DES     | -0.083364881 | 1.62666317 | -0.452645573 | 0.651187 | 0.69173 | -7.24012071 |
| SAP25   | 0.023087836  | 0.64158417 | 0.452352098  | 0.651398 | 0.69191 | -7.24025337 |
| DLEU7   | 0.01766575   | 0.42502823 | 0.452290296  | 0.651443 | 0.69191 | -7.2402813  |
| CSNK1E  | 0.033753241  | 5.49060123 | 0.451839932  | 0.651767 | 0.69221 | -7.24048468 |
| CCDC18  | -0.0201142   | 1.12736893 | -0.451503217 | 0.652009 | 0.69243 | -7.24063661 |
| RIOK3   | -0.030952165 | 5.26320414 | -0.451023225 | 0.652354 | 0.69274 | -7.24085299 |
| SLF2    | 0.027875542  | 3.50002858 | 0.450950658  | 0.652407 | 0.69274 | -7.24088569 |
| TOPBP1  | -0.032419732 | 3.58800559 | -0.450921678 | 0.652427 | 0.69274 | -7.24089874 |
| ZNF503  | -0.03298211  | 3.71291686 | -0.450797772 | 0.652517 | 0.69279 | -7.24095455 |
| MICAL3  | -0.03522396  | 1.61633066 | -0.450604178 | 0.652656 | 0.6929  | -7.24104171 |
| SHROOM  | -0.030827444 | 2.18114545 | -0.450175285 | 0.652965 | 0.69318 | -7.24123469 |
| SYT5    | 0.018815483  | 0.18374045 | 0.449862368  | 0.65319  | 0.69338 | -7.24137536 |
| TOP3B   | -0.006082001 | 0.19896834 | -0.449769425 | 0.653257 | 0.6934  | -7.24141713 |
| TMEM71  | -0.048026245 | 1.7063672  | -0.44911709  | 0.653727 | 0.69386 | -7.24171002 |
| TRH     | -0.017574782 | 0.11005507 | -0.447946278 | 0.65457  | 0.69471 | -7.24223463 |
| DDX52   | 0.030422381  | 3.24008468 | 0.447842187  | 0.654646 | 0.69475 | -7.24228121 |
| NPHP3   | -0.002551655 | 0.02751741 | 0.447464093  | 0.654918 | 0.69499 | -7.24245029 |
| ZEB2    | -0.033418182 | 1.84621333 | -0.447209951 | 0.655101 | 0.69514 | -7.24256387 |
| DMXL2   | 0.034797232  | 2.62149657 | 0.446791659  | 0.655403 | 0.69542 | -7.24275066 |
| TNNC2   | -0.058262398 | 2.12022716 | -0.445893473 | 0.656051 | 0.69606 | -7.24315115 |
| FBXO39  | 0.011010082  | 0.19274832 | 0.445559276  | 0.656292 | 0.69628 | -7.24329996 |
| GPAT2   | -0.042283907 | 0.84924505 | -0.44538087  | 0.656421 | 0.69637 | -7.24337936 |
| EYS     | 0.005698776  | 0.21534967 | 0.44527438   | 0.656497 | 0.69641 | -7.24342674 |
| ST8SIA2 | -0.036849616 | 0.61709493 | -0.445015645 | 0.656684 | 0.69656 | -7.2435418  |
| PPP1R9  | 0.040201969  | 3.36876202 | 0.444860698  | 0.656796 | 0.69664 | -7.24361067 |
| PUSL1   | -0.025546895 | 3.3996557  | -0.444641089 | 0.656955 | 0.69676 | -7.24370824 |
| CCDC33  | 0.012652567  | 0.1838692  | 0.44454848   | 0.657021 | 0.69679 | -7.24374938 |
| GPBAR1  | -0.018382718 | 0.60269181 | -0.444304379 | 0.657198 | 0.69693 | -7.24385775 |
| TBC1D3  | -0.01266762  | 0.342953   | -0.443700417 | 0.657634 | 0.69735 | -7.24412565 |
| L1TD1   | -0.010214691 | 0.17903597 | -0.443496984 | 0.657781 | 0.69746 | -7.2442158  |
| CHSY3   | -0.027470906 | 1.3002671  | -0.443006671 | 0.658135 | 0.69779 | -7.24443292 |
| ATL2    | -0.042075899 | 5.97048336 | -0.442359913 | 0.658602 | 0.69825 | -7.24471894 |
| PCSK5   | -0.053099349 | 2.63703532 | -0.441449045 | 0.65926  | 0.6989  | -7.24512106 |

|         |              |            |              |          |         |             |
|---------|--------------|------------|--------------|----------|---------|-------------|
| SAMD8   | -0.03260172  | 3.81716403 | -0.441257625 | 0.659399 | 0.699   | -7.24520546 |
| ASAP1   | -0.040091579 | 3.77082618 | -0.441015877 | 0.659573 | 0.69915 | -7.245312   |
| RNF139  | -0.034552671 | 5.67499957 | -0.440586791 | 0.659884 | 0.69943 | -7.24550096 |
| LY6H    | 0.029535186  | 0.41902228 | 0.440378733  | 0.660034 | 0.69955 | -7.24559251 |
| MKRN3   | 0.016840453  | 0.102388   | 0.439876243  | 0.660398 | 0.69989 | -7.24581346 |
| MYH7    | 0.033955554  | 0.13969416 | 0.439693038  | 0.66053  | 0.69998 | -7.24589395 |
| DDN     | -0.011376407 | 0.10586182 | -0.439357337 | 0.660773 | 0.7002  | -7.24604135 |
| CENPP   | 0.011974526  | 0.73173566 | 0.438603644  | 0.661318 | 0.70073 | -7.24637189 |
| UPK1B   | 0.010166718  | 0.07356208 | 0.437958075  | 0.661786 | 0.70118 | -7.24665455 |
| GREM2   | 0.039298873  | 0.54483089 | 0.437868107  | 0.661851 | 0.70121 | -7.24669391 |
| FOXL2Nl | -0.003340393 | 0.02212433 | -0.437307537 | 0.662257 | 0.70159 | -7.24693897 |
| PDC     | -0.006399555 | 0.1107317  | -0.437140786 | 0.662377 | 0.70165 | -7.24701181 |
| GPATCH  | -0.03849511  | 4.20577655 | -0.437127023 | 0.662387 | 0.70165 | -7.24701782 |
| PDE7A   | -0.042368555 | 3.56876257 | -0.436689806 | 0.662704 | 0.70191 | -7.24720866 |
| ZNF852  | -0.016909721 | 0.87111762 | -0.436668883 | 0.662719 | 0.70191 | -7.24721779 |
| LRIG3   | -0.051750902 | 5.48539673 | -0.436214948 | 0.663048 | 0.70221 | -7.24741571 |
| LY75    | 0.049983808  | 3.60592835 | 0.435954151  | 0.663237 | 0.70237 | -7.24752933 |
| ITGB1   | 0.055013484  | 6.45514227 | 0.435871847  | 0.663297 | 0.70239 | -7.24756517 |
| JOSD1   | 0.036838816  | 5.13999689 | 0.435820729  | 0.663334 | 0.70239 | -7.24758743 |
| ATP11B  | -0.041230217 | 3.93747856 | -0.435329557 | 0.66369  | 0.70272 | -7.24780117 |
| CA1     | 0.008937832  | 0.13189179 | 0.435137927  | 0.663829 | 0.70282 | -7.24788449 |
| SLC30A7 | -0.02866008  | 3.87464765 | -0.434773087 | 0.664093 | 0.70306 | -7.24804303 |
| COBL    | 0.051118515  | 2.53986516 | 0.434304409  | 0.664433 | 0.70337 | -7.24824649 |
| HOXA3   | -0.017685885 | 0.57486741 | -0.433684023 | 0.664883 | 0.70381 | -7.24851548 |
| DMRT1   | 0.041943956  | 0.74568005 | 0.432082797  | 0.666045 | 0.70497 | -7.24920796 |
| S100A5  | 0.068325164  | 4.66408001 | 0.432050754  | 0.666068 | 0.70497 | -7.24922179 |
| ERAS    | 0.013190225  | 0.13526614 | 0.431976335  | 0.666122 | 0.70499 | -7.24925391 |
| KCNH6   | -0.004986787 | 0.06716611 | -0.431913921 | 0.666167 | 0.70499 | -7.24928084 |
| VIL1    | -0.002705737 | 0.02223437 | -0.431655935 | 0.666354 | 0.70514 | -7.24939213 |
| N4BP1   | -0.025909267 | 4.45537184 | -0.431192619 | 0.666691 | 0.70546 | -7.24959183 |
| CDKN2D  | -0.027216624 | 3.32250186 | -0.43082843  | 0.666955 | 0.70569 | -7.24974865 |
| SLC26A5 | -0.020888875 | 0.56576137 | -0.430663636 | 0.667075 | 0.70577 | -7.24981956 |
| HPS3    | -0.036871899 | 3.67114706 | -0.430392274 | 0.667272 | 0.70594 | -7.24993628 |
| CAMK2D  | -0.036515025 | 4.74918687 | -0.430282841 | 0.667352 | 0.70598 | -7.24998333 |
| CTSB    | 0.043921898  | 11.9346653 | 0.429640955  | 0.667818 | 0.70643 | -7.25025906 |
| RAB23   | -0.058600173 | 3.21721462 | -0.428575451 | 0.668592 | 0.7072  | -7.25071584 |
| ZBTB33  | -0.038042184 | 4.76616925 | -0.42823656  | 0.668839 | 0.7074  | -7.25086089 |
| NKX2-8  | -0.044051648 | 2.68354229 | -0.428207536 | 0.66886  | 0.7074  | -7.25087331 |
| PTGDS   | 0.099333787  | 3.38286518 | 0.428005414  | 0.669007 | 0.70751 | -7.25095976 |
| UBA7    | -0.030854316 | 5.44392574 | -0.427172586 | 0.669612 | 0.7081  | -7.25131553 |

|         |              |            |              |          |         |             |
|---------|--------------|------------|--------------|----------|---------|-------------|
| GGA3    | 0.033164502  | 4.21149373 | 0.427077212  | 0.669682 | 0.70813 | -7.25135623 |
| SUN2    | -0.037503071 | 5.40589804 | -0.426780222 | 0.669898 | 0.70831 | -7.2514829  |
| SMARCA  | -0.02756526  | 5.59220187 | -0.426738606 | 0.669928 | 0.70831 | -7.25150065 |
| SYT11   | 0.052569167  | 2.95101004 | 0.425378173  | 0.670918 | 0.70931 | -7.25207973 |
| CERS3   | -0.003800217 | 0.05333403 | -0.423950132 | 0.671958 | 0.71036 | -7.25268561 |
| CCNG2   | -0.034037803 | 4.69685402 | -0.423768326 | 0.67209  | 0.71046 | -7.25276259 |
| DPPA4   | 0.00393542   | 0.0356007  | 0.423660699  | 0.672169 | 0.71046 | -7.25280816 |
| ISG15   | 0.06101225   | 6.51279884 | 0.423653099  | 0.672174 | 0.71046 | -7.25281137 |
| DNLZ    | 0.010085615  | 0.29150058 | 0.423363654  | 0.672385 | 0.71064 | -7.25293384 |
| CDK14   | 0.038145653  | 4.12866024 | 0.42204539   | 0.673346 | 0.71161 | -7.25349056 |
| IFITM1  | 0.052833884  | 6.35133496 | 0.421569256  | 0.673693 | 0.71193 | -7.25369122 |
| EXO1    | 0.018294924  | 0.68153659 | 0.421346093  | 0.673856 | 0.71206 | -7.25378518 |
| DBNDD2  | -0.02229976  | 1.62340184 | -0.419323412 | 0.675331 | 0.71357 | -7.25463461 |
| PRR11   | -0.024240448 | 1.30706601 | -0.419212078 | 0.675412 | 0.71362 | -7.25468125 |
| BRDT    | -0.006050533 | 0.06986788 | -0.41904356  | 0.675535 | 0.7137  | -7.25475181 |
| OVOL1   | -0.040013775 | 1.81883153 | -0.418934061 | 0.675615 | 0.7137  | -7.25479765 |
| NPIPA3  | -0.023681071 | 0.41242659 | -0.418923917 | 0.675623 | 0.7137  | -7.2548019  |
| RAB11FI | 0.03440069   | 3.37257995 | 0.41801517   | 0.676286 | 0.71436 | -7.25518183 |
| NKD1    | 0.02516098   | 0.45492413 | 0.417663167  | 0.676543 | 0.71459 | -7.25532878 |
| HR      | -0.045148165 | 1.50678656 | -0.417235466 | 0.676856 | 0.71487 | -7.25550716 |
| ANKUB1  | 0.002214011  | 0.01531351 | 0.417090277  | 0.676962 | 0.71494 | -7.25556768 |
| NUF2    | 0.026335959  | 0.98180632 | 0.416938295  | 0.677073 | 0.71501 | -7.255631   |
| ZWILCH  | -0.024744803 | 2.44837601 | -0.416747853 | 0.677212 | 0.71512 | -7.25571031 |
| PIK3R2  | 0.021817836  | 0.89748298 | 0.415493592  | 0.678128 | 0.71604 | -7.25623177 |
| ETV6    | -0.022507813 | 4.190808   | -0.414987749 | 0.678498 | 0.71638 | -7.25644162 |
| CPD     | -0.042023327 | 5.26348717 | -0.414670199 | 0.67873  | 0.71655 | -7.25657324 |
| MED12   | -0.032176127 | 4.4695804  | -0.414656111 | 0.678741 | 0.71655 | -7.25657907 |
| RAB34   | 0.040645286  | 6.9644545  | 0.412619377  | 0.680231 | 0.71808 | -7.25742079 |
| IGSF11  | 0.026811509  | 0.41036783 | 0.412566845  | 0.680269 | 0.71808 | -7.25744245 |
| ACTA1   | -0.040334967 | 0.58761209 | -0.412404104 | 0.680388 | 0.71816 | -7.25750951 |
| TULP1   | -0.010034063 | 0.20432722 | -0.412242322 | 0.680507 | 0.71824 | -7.25757616 |
| RTTN    | -0.019655179 | 1.63949681 | -0.412027336 | 0.680664 | 0.71836 | -7.25766469 |
| PLEKHO  | -0.044516892 | 3.68673875 | -0.411856769 | 0.680789 | 0.71845 | -7.25773489 |
| TBC1D3L | -0.018776149 | 0.59656905 | -0.411142997 | 0.681311 | 0.71895 | -7.25802835 |
| AP1S2   | -0.027857579 | 3.60150862 | -0.410888877 | 0.681497 | 0.7191  | -7.2581327  |
| DNHD1   | -0.020836728 | 1.01454461 | -0.410464508 | 0.681808 | 0.71939 | -7.25830683 |
| GBP4    | 0.057980095  | 3.88744987 | 0.410024778  | 0.68213  | 0.71968 | -7.25848706 |
| LPIN2   | 0.03493374   | 4.64212495 | 0.409844488  | 0.682262 | 0.71978 | -7.25856091 |
| CTTN    | 0.029840092  | 7.01255824 | 0.408826887  | 0.683008 | 0.72052 | -7.25897708 |
| HOXA9   | 0.017114915  | 0.11065155 | 0.408750965  | 0.683064 | 0.72053 | -7.25900809 |

|         |              |            |              |          |         |             |
|---------|--------------|------------|--------------|----------|---------|-------------|
| FGD1    | -0.028076162 | 3.5442779  | -0.408680314 | 0.683116 | 0.72054 | -7.25903694 |
| TTC3    | -0.034113375 | 5.79434223 | -0.408402112 | 0.68332  | 0.72065 | -7.2591505  |
| PPP1R1C | 0.047470228  | 1.05985269 | 0.408338153  | 0.683366 | 0.72065 | -7.25917659 |
| MCU     | -0.023053489 | 3.85696311 | -0.408329431 | 0.683373 | 0.72065 | -7.25918015 |
| ANP32D  | -0.006038661 | 0.09632444 | -0.408305551 | 0.68339  | 0.72065 | -7.25918989 |
| RNF222  | 0.004682371  | 0.07570506 | 0.408022584  | 0.683598 | 0.72083 | -7.25930529 |
| OVOL3   | -0.00954403  | 0.22707296 | -0.407248315 | 0.684166 | 0.72137 | -7.25962063 |
| ZSCAN2  | -0.027938401 | 0.89539607 | -0.407209002 | 0.684194 | 0.72137 | -7.25963663 |
| CCNK    | -0.032273078 | 1.85149146 | -0.406084157 | 0.68502  | 0.72219 | -7.26009365 |
| CTTNBP  | 0.032750702  | 3.64347411 | 0.403718245  | 0.686757 | 0.72398 | -7.26105078 |
| SATB2   | 0.021241914  | 0.89559699 | 0.403629172  | 0.686822 | 0.724   | -7.26108671 |
| DPEP3   | -0.0099932   | 0.14288161 | -0.402346895 | 0.687764 | 0.72495 | -7.26160301 |
| MED12L  | -0.019990298 | 0.60312059 | -0.401627016 | 0.688293 | 0.72546 | -7.26189214 |
| SH2D1B  | -0.014805225 | 0.30502026 | -0.401260873 | 0.688563 | 0.7257  | -7.262039   |
| KLHDC8  | 0.090717163  | 4.70888565 | 0.400504122  | 0.689119 | 0.72624 | -7.26234211 |
| PYGB    | 0.029460322  | 7.33863363 | 0.400407242  | 0.68919  | 0.72627 | -7.26238087 |
| ZNF621  | -0.026677093 | 3.16389734 | -0.400095283 | 0.68942  | 0.72647 | -7.26250563 |
| IPMK    | -0.027997315 | 2.67007245 | -0.399833476 | 0.689612 | 0.72663 | -7.26261025 |
| RICTOR  | -0.029335375 | 3.0293371  | -0.399596752 | 0.689786 | 0.72677 | -7.2627048  |
| ARHGEF  | -0.037374972 | 5.1205084  | -0.399363079 | 0.689958 | 0.7269  | -7.26279807 |
| RAD9B   | -0.010346625 | 0.51774418 | -0.399099977 | 0.690152 | 0.72706 | -7.26290302 |
| ADAD2   | -0.006301133 | 0.08994891 | -0.398907715 | 0.690293 | 0.72716 | -7.26297966 |
| HIPK4   | -0.013308136 | 0.47701066 | -0.398262839 | 0.690768 | 0.72762 | -7.26323648 |
| FBLIM1  | 0.03804432   | 4.01442426 | 0.398109776  | 0.690881 | 0.72769 | -7.26329738 |
| PGLYRP  | -0.010766377 | 0.2018086  | -0.39789192  | 0.691041 | 0.72782 | -7.26338402 |
| MTMR8   | 0.013289136  | 0.84519574 | 0.397362683  | 0.691431 | 0.72818 | -7.26359428 |
| BCL7A   | -0.031636701 | 4.44840531 | -0.396156406 | 0.692319 | 0.72907 | -7.26407248 |
| IL17B   | 0.009956087  | 0.21074748 | 0.39569598   | 0.692659 | 0.72938 | -7.26425462 |
| STK24   | -0.040878939 | 4.0049975  | -0.395085824 | 0.693108 | 0.72981 | -7.26449567 |
| TTBK1   | 0.007775669  | 0.20057134 | 0.394999725  | 0.693172 | 0.72981 | -7.26452965 |
| UACA    | -0.045044847 | 5.39568717 | -0.394965441 | 0.693197 | 0.72981 | -7.26454318 |
| PFKFB4  | -0.027103429 | 1.79788504 | -0.394643634 | 0.693434 | 0.73002 | -7.26467013 |
| EGR4    | -0.021986154 | 0.21102537 | -0.394214933 | 0.69375  | 0.73031 | -7.26483908 |
| ARHGAP  | 0.041094325  | 4.02958843 | 0.393922454  | 0.693966 | 0.73049 | -7.26495424 |
| JADE2   | -0.030174186 | 4.57511558 | -0.393177666 | 0.694515 | 0.73102 | -7.26524711 |
| FXYD2   | 0.008279401  | 0.21241332 | 0.392837497  | 0.694766 | 0.73124 | -7.26538069 |
| FER     | -0.032466802 | 2.83825548 | -0.392523371 | 0.694998 | 0.73144 | -7.26550394 |
| UTF1    | 0.007660715  | 0.09303945 | 0.392238081  | 0.695208 | 0.73161 | -7.26561579 |
| LSAMP   | 0.03554987   | 0.67219377 | 0.391985449  | 0.695395 | 0.73176 | -7.26571477 |
| DDO     | 0.040911466  | 2.8165995  | 0.391928629  | 0.695437 | 0.73176 | -7.26573702 |

|         |              |            |              |          |         |             |
|---------|--------------|------------|--------------|----------|---------|-------------|
| CATSPE  | 0.020184367  | 1.34126947 | 0.391654464  | 0.695639 | 0.73193 | -7.26584435 |
| ODF2L   | -0.024610546 | 3.19711922 | -0.390481409 | 0.696505 | 0.7328  | -7.26630272 |
| CKAP5   | -0.029234175 | 4.41334655 | -0.390350087 | 0.696602 | 0.73285 | -7.26635394 |
| KAAG1   | -0.020636121 | 0.75554712 | -0.389894348 | 0.696939 | 0.73313 | -7.26653159 |
| ADORA2  | 0.032555356  | 0.98873773 | 0.389873257  | 0.696954 | 0.73313 | -7.26653981 |
| SPSB4   | 0.01369879   | 0.14218584 | 0.389669847  | 0.697104 | 0.73325 | -7.26661903 |
| SKAP1   | -0.053878684 | 1.87351422 | -0.389258117 | 0.697409 | 0.73352 | -7.26677925 |
| RESF1   | -0.032087343 | 4.10040897 | -0.388822164 | 0.697731 | 0.73381 | -7.26694872 |
| TFAP2E  | 0.024208299  | 0.88471447 | 0.387909224  | 0.698405 | 0.73448 | -7.26730298 |
| LATS1   | -0.030838814 | 3.68038759 | -0.387702258 | 0.698558 | 0.73459 | -7.26738318 |
| RHBDF2  | 0.023729596  | 3.52860056 | 0.386763355  | 0.699252 | 0.73528 | -7.26774646 |
| TMEM24  | -0.003932249 | 0.06104652 | -0.386607627 | 0.699368 | 0.73535 | -7.26780663 |
| NYAP1   | -0.016657058 | 0.52786873 | -0.386423162 | 0.699504 | 0.73545 | -7.26787787 |
| RBL1    | -0.025322458 | 2.38919605 | -0.386365681 | 0.699547 | 0.73545 | -7.26790006 |
| NPFFR2  | -0.046369971 | 0.83789917 | -0.386104382 | 0.69974  | 0.73561 | -7.2680009  |
| SPATA5  | -0.023249441 | 2.02900091 | -0.385982451 | 0.69983  | 0.73566 | -7.26804794 |
| ZFYVE15 | -0.029345799 | 4.46566705 | -0.385636703 | 0.700086 | 0.73588 | -7.26818122 |
| CD14    | -0.040599239 | 6.20243208 | -0.385521623 | 0.700171 | 0.73592 | -7.26822556 |
| ACVR2B  | 0.024736077  | 1.96711035 | 0.385419571  | 0.700246 | 0.73596 | -7.26826487 |
| KLHL31  | 0.029859356  | 1.1039863  | 0.384660248  | 0.700808 | 0.7365  | -7.268557   |
| ABHD171 | -0.036510254 | 4.54519382 | -0.384026952 | 0.701277 | 0.73695 | -7.26880021 |
| FOXJ2   | -0.024898646 | 3.97293449 | -0.383911601 | 0.701362 | 0.73699 | -7.26884447 |
| TUBGCP  | -0.030170331 | 4.50675451 | -0.383678055 | 0.701535 | 0.73713 | -7.26893403 |
| MUC15   | 0.061805589  | 7.01187666 | 0.383312357  | 0.701806 | 0.73737 | -7.26907416 |
| LAMA2   | 0.041830081  | 1.42628186 | 0.382105429  | 0.7027   | 0.73823 | -7.26953569 |
| C7orf61 | -0.034018403 | 0.9926873  | -0.382093238 | 0.702709 | 0.73823 | -7.26954035 |
| CLIC6   | -0.055050732 | 4.99114342 | -0.381901885 | 0.702851 | 0.73833 | -7.26961339 |
| DQX1    | -0.006602515 | 0.1257789  | -0.381488911 | 0.703157 | 0.7386  | -7.26977089 |
| GATA6   | -0.03617651  | 3.17336548 | -0.380985858 | 0.703529 | 0.73895 | -7.26996252 |
| PAWR    | 0.029008601  | 4.1314511  | 0.379645699  | 0.704523 | 0.73995 | -7.27047181 |
| CRB1    | -0.005851086 | 0.14098468 | -0.37941765  | 0.704692 | 0.74008 | -7.27055829 |
| ZNF160  | -0.0272966   | 3.61570597 | -0.379240619 | 0.704823 | 0.74017 | -7.27062539 |
| H6PD    | -0.032144194 | 5.13173985 | -0.37899378  | 0.705006 | 0.74032 | -7.2707189  |
| THPO    | 0.008516919  | 0.24309466 | 0.37834114   | 0.70549  | 0.74078 | -7.27096584 |
| TMTC2   | 0.031071354  | 2.73724245 | 0.377927818  | 0.705797 | 0.74106 | -7.27112201 |
| ZBED4   | -0.02708266  | 2.99885056 | -0.377462189 | 0.706143 | 0.74137 | -7.27129774 |
| B3GALT1 | -0.03059939  | 0.62897174 | -0.376618932 | 0.706769 | 0.74198 | -7.27161543 |
| CEP250  | 0.020224573  | 2.82542974 | 0.376542019  | 0.706826 | 0.742   | -7.27164437 |
| PCOLCE  | -0.040906111 | 0.90487181 | -0.375739824 | 0.707421 | 0.74258 | -7.27194588 |
| PER3    | -0.041034079 | 4.36073106 | -0.373567648 | 0.709035 | 0.74423 | -7.27275906 |



|         |              |            |              |          |         |             |
|---------|--------------|------------|--------------|----------|---------|-------------|
| KLF4    | 0.055350129  | 4.66890525 | 0.371168924  | 0.710818 | 0.74605 | -7.27365159 |
| PHF8    | -0.03148686  | 3.8129177  | -0.370794942 | 0.711097 | 0.7463  | -7.27379022 |
| LRRN4C  | -0.028037695 | 0.50706713 | -0.369884332 | 0.711774 | 0.74696 | -7.2741272  |
| SHOX    | 0.002701739  | 0.02914762 | 0.369673076  | 0.711931 | 0.74708 | -7.27420526 |
| CDKAL1  | 0.026363071  | 4.05647114 | 0.368926177  | 0.712487 | 0.74762 | -7.27448088 |
| ITGAD   | 0.016231955  | 0.23870136 | 0.368865068  | 0.712533 | 0.74762 | -7.27450341 |
| NFIX    | -0.033876537 | 5.6965466  | -0.36844327  | 0.712847 | 0.7479  | -7.27465879 |
| ZDHHC1  | 0.027173384  | 3.62930269 | 0.368242188  | 0.712997 | 0.74801 | -7.2747328  |
| SPIN4   | -0.026778238 | 2.2384111  | -0.368011217 | 0.713169 | 0.74815 | -7.27481776 |
| CLK1    | -0.037851052 | 5.88310741 | -0.367004668 | 0.713918 | 0.74886 | -7.2751874  |
| RAD51   | 0.021052372  | 1.28718372 | 0.366982197  | 0.713935 | 0.74886 | -7.27519564 |
| IFNL1   | -0.036445358 | 3.55516354 | -0.36664242  | 0.714188 | 0.74903 | -7.27532018 |
| STAP2   | -0.028192817 | 5.4329763  | -0.366641087 | 0.714189 | 0.74903 | -7.27532067 |
| ZNF516  | 0.029263639  | 3.48978839 | 0.365464254  | 0.715066 | 0.74991 | -7.27575113 |
| ZFYVE2  | 0.022578699  | 2.84964424 | 0.364314259  | 0.715924 | 0.75076 | -7.27617044 |
| BTN2A2  | 0.024945525  | 2.86212023 | 0.364225349  | 0.71599  | 0.75078 | -7.2762028  |
| STK35   | 0.025702178  | 4.10192453 | 0.364106891  | 0.716078 | 0.75078 | -7.27624591 |
| MAD1L1  | 0.019544083  | 3.89836267 | 0.364104013  | 0.716081 | 0.75078 | -7.27624696 |
| FAM72C  | -0.00377464  | 0.05654507 | -0.363720737 | 0.716366 | 0.75104 | -7.27638633 |
| ARL5B   | 0.030048162  | 3.5600163  | 0.363586673  | 0.716466 | 0.7511  | -7.27643505 |
| KHDC4   | 0.029955583  | 4.26169664 | 0.363332538  | 0.716656 | 0.75125 | -7.27652735 |
| KLHL11  | 0.040595786  | 1.64126933 | 0.363151427  | 0.716791 | 0.75134 | -7.27659309 |
| DYNC1H  | -0.024487075 | 6.23655513 | -0.36308502  | 0.716841 | 0.75135 | -7.27661718 |
| SRD5A2  | 0.00493837   | 0.05094893 | 0.36234772   | 0.717391 | 0.75184 | -7.27688442 |
| HIP1    | 0.038919809  | 5.1413196  | 0.362343923  | 0.717394 | 0.75184 | -7.27688579 |
| CDKN3   | -0.025096471 | 1.21925606 | -0.361633121 | 0.717924 | 0.75235 | -7.27714291 |
| SLX1A   | 0.00261354   | 0.03226331 | 0.361227065  | 0.718227 | 0.75262 | -7.27728956 |
| ARFGEF  | -0.032008589 | 4.60123142 | -0.360805006 | 0.718543 | 0.7529  | -7.27744182 |
| RGPD8   | 0.014449191  | 0.62047406 | 0.360130362  | 0.719046 | 0.75334 | -7.27768483 |
| SEPTIN3 | -0.03802859  | 1.8357866  | -0.360128242 | 0.719048 | 0.75334 | -7.27768559 |
| NLRP1   | -0.03803863  | 3.58433262 | -0.359981636 | 0.719157 | 0.75341 | -7.27773834 |
| P2RY11  | -0.027080913 | 3.26162068 | -0.359314681 | 0.719656 | 0.75388 | -7.27797803 |
| EPO     | -0.00497034  | 0.08461839 | -0.358718874 | 0.720101 | 0.7543  | -7.27819178 |
| ATF7IP  | -0.027961407 | 4.82307422 | -0.357617765 | 0.720924 | 0.75511 | -7.27858588 |
| TOMM34  | -0.027592231 | 6.31291536 | -0.357569338 | 0.72096  | 0.75511 | -7.27860318 |
| TMEM21  | 0.01242966   | 0.33857283 | 0.357134454  | 0.721285 | 0.7554  | -7.27875848 |
| TNKS    | -0.029094992 | 3.76791292 | -0.357044747 | 0.721352 | 0.75542 | -7.27879049 |
| CACNA1  | 0.015492373  | 0.11608885 | 0.356479176  | 0.721775 | 0.75582 | -7.27899212 |
| TP53INP | 0.030578151  | 4.76204728 | 0.356423998  | 0.721816 | 0.75582 | -7.27901177 |
| APOBEC  | -0.022515197 | 2.94957543 | -0.355877387 | 0.722225 | 0.7562  | -7.27920631 |

|         |              |            |              |          |         |             |
|---------|--------------|------------|--------------|----------|---------|-------------|
| TTF2    | -0.022664184 | 2.20137587 | -0.355430967 | 0.722559 | 0.7565  | -7.27936496 |
| CRYBG3  | -0.061280234 | 3.46764219 | -0.354946454 | 0.722922 | 0.75683 | -7.27953694 |
| TNFAIP8 | -0.032225237 | 1.52320627 | -0.354656579 | 0.723139 | 0.75701 | -7.27963971 |
| SLC31A2 | 0.022830152  | 1.10509378 | 0.35355929   | 0.72396  | 0.75783 | -7.28002799 |
| CALCOC  | 0.029448374  | 5.45966795 | 0.35310046   | 0.724303 | 0.75814 | -7.28018999 |
| CA3     | -0.034677806 | 2.5187222  | -0.352787856 | 0.724538 | 0.75834 | -7.28030025 |
| ARR3    | -0.01461946  | 0.72817512 | -0.349915335 | 0.72669  | 0.76054 | -7.2813088  |
| NOX1    | -0.019407304 | 1.21763903 | -0.349637389 | 0.726898 | 0.76072 | -7.28140595 |
| FOXDI   | 0.01334334   | 0.20716321 | 0.349507619  | 0.726995 | 0.76077 | -7.28145128 |
| TMC5    | 0.026118153  | 1.00587419 | 0.348552295  | 0.727712 | 0.76146 | -7.28178449 |
| NCCRP1  | 0.038339294  | 1.05727147 | 0.348508513  | 0.727745 | 0.76146 | -7.28179974 |
| PCDHGA  | -0.045009595 | 1.72492605 | -0.348323071 | 0.727884 | 0.76156 | -7.2818643  |
| CALB1   | -0.006822847 | 0.1105823  | -0.347995675 | 0.728129 | 0.76177 | -7.28197821 |
| ZNF485  | -0.016561209 | 1.60777474 | -0.346971354 | 0.728898 | 0.76253 | -7.2823339  |
| NEUROD  | -0.002285528 | 0.02892919 | -0.346744383 | 0.729068 | 0.76266 | -7.28241257 |
| SAG     | 0.001841317  | 0.01495341 | 0.346655717  | 0.729135 | 0.76268 | -7.28244329 |
| LTK     | 0.030247172  | 0.8900745  | 0.346022059  | 0.72961  | 0.76313 | -7.2826626  |
| RAD51AI | -0.024207242 | 1.89452017 | -0.344785709 | 0.730538 | 0.76405 | -7.28308934 |
| ZNF705A | -0.0029716   | 0.02102064 | -0.344733295 | 0.730578 | 0.76405 | -7.2831074  |
| MAGEE2  | -0.016359134 | 0.40814423 | -0.343964842 | 0.731155 | 0.7646  | -7.28337184 |
| ARHGAP  | 0.03405098   | 5.41037218 | 0.343275562  | 0.731673 | 0.7651  | -7.28360852 |
| RAVER1  | -0.035024478 | 3.72952468 | -0.342920838 | 0.731939 | 0.76533 | -7.28373015 |
| KRTAP5  | -0.020035453 | 0.47453393 | -0.342628996 | 0.732158 | 0.76551 | -7.28383011 |
| SNX9    | -0.024198704 | 5.79594802 | -0.34238032  | 0.732345 | 0.76566 | -7.28391523 |
| GCNA    | -0.030547477 | 1.7046051  | -0.342182009 | 0.732494 | 0.76577 | -7.28398306 |
| EDA2R   | 0.037505716  | 3.68825215 | 0.342088631  | 0.732565 | 0.7658  | -7.28401499 |
| ACTN2   | 0.020378932  | 0.16800125 | 0.341662694  | 0.732885 | 0.76608 | -7.28416051 |
| POU3F2  | -0.002177807 | 0.03468464 | -0.341099761 | 0.733308 | 0.76648 | -7.28435255 |
| DOK4    | -0.028216084 | 4.33805439 | -0.34053116  | 0.733736 | 0.76688 | -7.28454621 |
| WRN     | -0.025944418 | 2.55887811 | -0.340382622 | 0.733847 | 0.76695 | -7.28459674 |
| MYSM1   | 0.030282212  | 3.1479591  | 0.339548326  | 0.734475 | 0.76744 | -7.28488018 |
| SF3A2   | 0.02352715   | 5.97176585 | 0.339523231  | 0.734494 | 0.76744 | -7.2848887  |
| ADAMTS  | -0.045457007 | 4.17336104 | -0.339515954 | 0.734499 | 0.76744 | -7.28489117 |
| PALB2   | -0.02161748  | 3.05181397 | -0.339513365 | 0.734501 | 0.76744 | -7.28489205 |
| PCDHA9  | -0.003058423 | 0.05779429 | -0.339219445 | 0.734722 | 0.76758 | -7.28499173 |
| RECQL   | 0.039882398  | 3.56670385 | 0.33921775   | 0.734724 | 0.76758 | -7.2849923  |
| MYCBP2  | -0.031575223 | 3.66811206 | -0.338679716 | 0.735128 | 0.76795 | -7.28517454 |
| HOXB7   | -0.028407653 | 1.09365228 | -0.338555109 | 0.735222 | 0.76801 | -7.28521671 |
| PLEKHG  | 0.034962543  | 3.25175908 | 0.338351998  | 0.735375 | 0.76812 | -7.28528541 |
| MAFK    | -0.031504576 | 3.97771185 | -0.338270074 | 0.735437 | 0.76813 | -7.28531311 |

|         |              |            |              |          |         |             |
|---------|--------------|------------|--------------|----------|---------|-------------|
| WDR26   | -0.026303058 | 5.2093409  | -0.338204275 | 0.735486 | 0.76814 | -7.28533535 |
| TOR4A   | 0.033956487  | 4.35849343 | 0.335364828  | 0.737624 | 0.77032 | -7.28629099 |
| ARHGEF  | 0.018720612  | 1.38003892 | 0.334022389  | 0.738636 | 0.77133 | -7.28674    |
| FARP1   | 0.02913222   | 3.7389268  | 0.333630527  | 0.738931 | 0.77159 | -7.28687073 |
| TREML4  | -0.006839379 | 0.05948015 | -0.33355424  | 0.738989 | 0.77161 | -7.28689616 |
| NPAT    | 0.027657406  | 3.16951479 | 0.333417211  | 0.739092 | 0.77167 | -7.28694183 |
| SNAI2   | -0.03702673  | 2.71577244 | -0.333290006 | 0.739188 | 0.77172 | -7.2869842  |
| CCDC18  | 0.018339779  | 0.9658749  | 0.333134754  | 0.739305 | 0.77178 | -7.2870359  |
| IL5     | 0.004463359  | 0.1113696  | 0.333091938  | 0.739337 | 0.77178 | -7.28705016 |
| PRKG2   | -0.013103012 | 0.26640563 | -0.332711949 | 0.739624 | 0.77203 | -7.28717657 |
| ZFC3H1  | -0.026574668 | 3.50907269 | -0.332216425 | 0.739997 | 0.77238 | -7.28734121 |
| TAS2R2C | -0.016655526 | 0.84771868 | -0.331272862 | 0.740709 | 0.77307 | -7.28765403 |
| TSBP1   | 0.003757025  | 0.0535304  | 0.331196692  | 0.740767 | 0.77308 | -7.28767924 |
| RPS4X   | -0.026046631 | 11.0452959 | -0.330837005 | 0.741038 | 0.77332 | -7.28779822 |
| HTD2    | 0.00429138   | 0.11776625 | 0.330350395  | 0.741405 | 0.77365 | -7.28795899 |
| LRRC8A  | 0.028089544  | 5.78906268 | 0.330266388  | 0.741469 | 0.77367 | -7.28798672 |
| PDE3A   | 0.024840966  | 1.5352784  | 0.329936607  | 0.741717 | 0.77388 | -7.28809551 |
| CLCN1   | -0.006822515 | 0.14386531 | -0.329445432 | 0.742088 | 0.77422 | -7.28825734 |
| IRF7    | -0.030965735 | 4.46275115 | -0.329224394 | 0.742255 | 0.77435 | -7.28833009 |
| DDHD1   | 0.01917502   | 1.92292304 | 0.328922839  | 0.742483 | 0.77454 | -7.28842926 |
| SIX4    | 0.026187238  | 1.66566924 | 0.328738779  | 0.742622 | 0.77464 | -7.28848975 |
| MATK    | 0.029516529  | 1.5652949  | 0.327907893  | 0.743249 | 0.77524 | -7.28876237 |
| EPB41L4 | 0.030377603  | 2.99810892 | 0.327787678  | 0.74334  | 0.77526 | -7.28880176 |
| BDP1    | -0.028385051 | 3.39358286 | -0.327762866 | 0.743359 | 0.77526 | -7.28880988 |
| HIST1H1 | -0.012237036 | 0.18840555 | -0.327393887 | 0.743637 | 0.77551 | -7.28893068 |
| ARHGAP  | -0.018947333 | 1.09246196 | -0.326071316 | 0.744637 | 0.7765  | -7.28936253 |
| FMR1    | -0.025386361 | 4.88291599 | -0.325552591 | 0.745029 | 0.77686 | -7.28953143 |
| FNBP4   | -0.029186662 | 4.65740306 | -0.32547264  | 0.745089 | 0.77688 | -7.28955743 |
| LEP     | 0.008344621  | 0.07740126 | 0.325161416  | 0.745324 | 0.77703 | -7.28965862 |
| STX3    | 0.025965196  | 4.92327202 | 0.32515214   | 0.745331 | 0.77703 | -7.28966163 |
| CD200   | -0.032069596 | 5.00291466 | -0.324645931 | 0.745714 | 0.77736 | -7.28982599 |
| GGTLC3  | -0.013617648 | 0.21513958 | -0.3246161   | 0.745737 | 0.77736 | -7.28983567 |
| SSPN    | -0.041689464 | 4.09959408 | -0.324536081 | 0.745797 | 0.77737 | -7.28986163 |
| OCIAD2  | -0.024750226 | 6.60278498 | -0.324478355 | 0.745841 | 0.77737 | -7.28988035 |
| PHC3    | 0.027366336  | 3.13574563 | 0.324328547  | 0.745954 | 0.7774  | -7.28992891 |
| SGTB    | -0.023979945 | 2.25678397 | -0.324326092 | 0.745956 | 0.7774  | -7.28992971 |
| CTC1    | 0.023401193  | 3.8054651  | 0.324176255  | 0.746069 | 0.77747 | -7.28997826 |
| CAPN6   | -0.047518553 | 1.0353008  | -0.32386037  | 0.746308 | 0.77767 | -7.29008055 |
| CD160   | 0.01029979   | 0.39326335 | 0.323489792  | 0.746588 | 0.77791 | -7.29020042 |
| TJP2    | -0.031720355 | 5.93760304 | -0.322156275 | 0.747597 | 0.77892 | -7.29063064 |

|         |              |            |              |          |         |             |
|---------|--------------|------------|--------------|----------|---------|-------------|
| AK5     | -0.012656949 | 0.25605479 | -0.321590345 | 0.748025 | 0.77932 | -7.29081269 |
| ZKSCAN  | -0.022121562 | 4.37847256 | -0.320559383 | 0.748806 | 0.78008 | -7.29114349 |
| MORC4   | 0.029014653  | 3.91970575 | 0.320490504  | 0.748858 | 0.78009 | -7.29116556 |
| MCHR1   | 0.010337101  | 0.06889636 | 0.320405408  | 0.748922 | 0.78011 | -7.29119281 |
| C1orf54 | 0.021924978  | 4.43539167 | 0.320173691  | 0.749098 | 0.78024 | -7.29126698 |
| MBP     | 0.027056051  | 3.49010965 | 0.32005642   | 0.749186 | 0.78026 | -7.2913045  |
| HECA    | -0.019907851 | 4.07278633 | -0.320026735 | 0.749209 | 0.78026 | -7.29131399 |
| BICD1   | 0.026260959  | 2.9653667  | 0.319897403  | 0.749307 | 0.78032 | -7.29135535 |
| ASXL2   | -0.028636792 | 3.41540512 | -0.319203502 | 0.749832 | 0.78081 | -7.29157695 |
| SGCA    | -0.025772094 | 1.02901033 | -0.31903932  | 0.749957 | 0.7809  | -7.29162931 |
| BTN1A1  | 0.006143277  | 0.12123547 | 0.318714548  | 0.750203 | 0.78107 | -7.29173281 |
| TLN1    | -0.024477989 | 6.6352282  | -0.318700172 | 0.750214 | 0.78107 | -7.29173738 |
| NOTO    | 0.002592194  | 0.03713633 | 0.318053214  | 0.750704 | 0.78153 | -7.29194323 |
| ZNF236  | -0.021907641 | 2.3896456  | -0.317813909 | 0.750885 | 0.78167 | -7.29201927 |
| CCDC42  | -0.009316187 | 0.22370818 | -0.317258976 | 0.751305 | 0.78206 | -7.29219537 |
| SRCAP   | -0.019092103 | 5.01875103 | -0.317073476 | 0.751446 | 0.78216 | -7.29225417 |
| OR7D2   | 0.016896877  | 0.22450986 | 0.316380284  | 0.751971 | 0.78266 | -7.29247359 |
| P4HA2   | 0.031996542  | 4.82301925 | 0.315397964  | 0.752716 | 0.78335 | -7.2927837  |
| IRX2    | 0.060364275  | 1.94526526 | 0.315383574  | 0.752727 | 0.78335 | -7.29278824 |
| ANKRD3  | 0.005179737  | 0.0468818  | 0.315241641  | 0.752835 | 0.78341 | -7.29283296 |
| SOX2    | -0.004383792 | 0.08182554 | -0.314893642 | 0.753099 | 0.78363 | -7.29294254 |
| BMPER   | 0.027626069  | 0.6129326  | 0.314839224  | 0.75314  | 0.78363 | -7.29295966 |
| TSPYL6  | -0.002008677 | 0.02489364 | -0.314000714 | 0.753776 | 0.78425 | -7.29322315 |
| BLOC1S1 | -0.009857405 | 0.37199337 | -0.313860613 | 0.753882 | 0.78431 | -7.2932671  |
| TRPC7   | -0.006140898 | 0.04927008 | -0.313128278 | 0.754438 | 0.78484 | -7.29349655 |
| ENAH    | -0.026352632 | 3.57688853 | -0.311750187 | 0.755484 | 0.78588 | -7.29392686 |
| ZNF8    | -0.018743872 | 2.08218303 | -0.310512556 | 0.756424 | 0.78681 | -7.29431169 |
| KIFC2   | -0.028400141 | 3.04075669 | -0.310269479 | 0.756608 | 0.78695 | -7.2943871  |
| CCNE2   | 0.016239066  | 0.9982053  | 0.310169372  | 0.756684 | 0.78698 | -7.29441813 |
| ASCL1   | 0.010642533  | 0.11996282 | 0.309873346  | 0.756909 | 0.78717 | -7.29450985 |
| KIF18A  | 0.022894289  | 1.69818668 | 0.309528254  | 0.757171 | 0.78739 | -7.29461666 |
| CRLF3   | 0.019329382  | 3.10694267 | 0.309221063  | 0.757405 | 0.78759 | -7.29471164 |
| GUCY1A  | 0.032342342  | 2.84066038 | 0.308872658  | 0.757669 | 0.78781 | -7.29481925 |
| SKA1    | 0.016109487  | 0.73193094 | 0.308776895  | 0.757742 | 0.78784 | -7.29484881 |
| CDRT4   | -0.021597979 | 1.03501296 | -0.308618737 | 0.757862 | 0.78792 | -7.2948976  |
| PRKY    | 0.027489102  | 0.43347837 | 0.307477629  | 0.75873  | 0.78877 | -7.29524891 |
| WNT6    | 0.017325308  | 0.45581571 | 0.307320743  | 0.758849 | 0.78882 | -7.29529711 |
| BMP2K   | 0.021842301  | 1.76938205 | 0.307299257  | 0.758865 | 0.78882 | -7.29530371 |
| CA11    | -0.037637794 | 6.0633219  | -0.307078702 | 0.759033 | 0.78894 | -7.29537142 |
| SH3D21  | -0.04662717  | 3.8824131  | -0.306949491 | 0.759131 | 0.789   | -7.29541107 |

|          |              |            |              |          |         |             |
|----------|--------------|------------|--------------|----------|---------|-------------|
| MYBL1    | 0.013831451  | 0.91195493 | 0.306653745  | 0.759356 | 0.78918 | -7.29550175 |
| PXN      | 0.019524994  | 5.99759261 | 0.306557957  | 0.759429 | 0.78921 | -7.2955311  |
| SCN5A    | -0.020851565 | 0.58425253 | -0.306148421 | 0.75974  | 0.78945 | -7.29565649 |
| COL27A1  | -0.035202597 | 1.78438775 | -0.306134675 | 0.759751 | 0.78945 | -7.29566069 |
| DENND2   | -0.016945154 | 4.31980754 | -0.305987696 | 0.759862 | 0.78951 | -7.29570565 |
| JADE3    | 0.02399557   | 3.3371318  | 0.304834122  | 0.76074  | 0.79038 | -7.29605776 |
| DLX2     | -0.006651973 | 0.1532138  | -0.304721829 | 0.760825 | 0.79038 | -7.29609196 |
| NBPF10   | -0.008029504 | 0.44443306 | -0.304698249 | 0.760843 | 0.79038 | -7.29609915 |
| CHD4     | -0.023247662 | 7.3914873  | -0.304644462 | 0.760884 | 0.79038 | -7.29611552 |
| FEM1C    | -0.02065975  | 3.76436879 | -0.303999819 | 0.761375 | 0.79084 | -7.29631159 |
| TYMS     | 0.029003879  | 3.71872882 | 0.30390282   | 0.761449 | 0.79087 | -7.29634105 |
| RBP1     | 0.046897434  | 3.15417211 | 0.303744844  | 0.761569 | 0.79095 | -7.29638902 |
| FMO5     | -0.033986275 | 1.82062813 | -0.303395654 | 0.761835 | 0.79118 | -7.29649496 |
| KIDINS2  | -0.028964337 | 4.72260094 | -0.303224924 | 0.761965 | 0.79126 | -7.29654672 |
| GRID1    | 0.038545858  | 4.01987032 | 0.303165448  | 0.76201  | 0.79126 | -7.29656474 |
| SLC7A8   | -0.034599623 | 5.75044011 | -0.302965309 | 0.762162 | 0.79137 | -7.29662536 |
| DDX4     | 0.00196268   | 0.02027212 | 0.301768201  | 0.763074 | 0.79227 | -7.29698712 |
| AIRE     | 0.005853556  | 0.05059551 | 0.301375735  | 0.763372 | 0.79253 | -7.2971054  |
| TNFRSF   | 0.029049211  | 2.93648193 | 0.299833643  | 0.764547 | 0.7937  | -7.2975687  |
| GABRA1   | 0.003526554  | 0.05091184 | 0.299694432  | 0.764653 | 0.79376 | -7.2976104  |
| ABHD12I  | 0.006883938  | 0.19242249 | 0.299458897  | 0.764833 | 0.7939  | -7.29768093 |
| CASP2    | -0.018027608 | 3.55424558 | -0.299236788 | 0.765002 | 0.79403 | -7.29774737 |
| CLDN3    | -0.032912934 | 8.72895445 | -0.299176175 | 0.765048 | 0.79403 | -7.2977655  |
| RBMXL2   | -0.00362409  | 0.05290668 | -0.297378109 | 0.766419 | 0.7954  | -7.29830152 |
| PPP1R9I  | 0.018171148  | 6.12858006 | 0.296425313  | 0.767145 | 0.79611 | -7.29858424 |
| SGSM1    | -0.02591702  | 2.2285708  | -0.296203948 | 0.767314 | 0.79618 | -7.2986498  |
| CYP26C1  | 0.00870398   | 0.25820423 | 0.296203011  | 0.767315 | 0.79618 | -7.29865008 |
| KHNYN    | 0.022892668  | 4.245816   | 0.295844405  | 0.767589 | 0.79642 | -7.29875617 |
| ADA2     | 0.050486439  | 4.57729131 | 0.295325326  | 0.767985 | 0.79678 | -7.29890952 |
| SFTPA1   | 0.093674999  | 1.84243667 | 0.294902003  | 0.768308 | 0.79707 | -7.29903438 |
| AKAP11   | 0.027499166  | 4.16027086 | 0.294356074  | 0.768724 | 0.79745 | -7.29919513 |
| CEP135   | -0.017405058 | 1.75497749 | -0.293338034 | 0.769501 | 0.79821 | -7.29949411 |
| BAAT     | 0.002573814  | 0.04236303 | 0.29254333   | 0.770108 | 0.79879 | -7.29972678 |
| KCTD4    | -0.001987965 | 0.03038623 | -0.291957776 | 0.770555 | 0.7992  | -7.29989782 |
| LNPEP    | -0.022593645 | 3.84262341 | -0.291846439 | 0.77064  | 0.79924 | -7.2999303  |
| KIF26B   | -0.024845451 | 1.50519844 | -0.291669461 | 0.770775 | 0.79933 | -7.29998191 |
| POLH     | 0.025121306  | 3.8958935  | 0.290929693  | 0.77134  | 0.79987 | -7.30019728 |
| PON2     | 0.028060554  | 5.70767981 | 0.290700315  | 0.771516 | 0.8     | -7.30026395 |
| C17orf99 | 0.006311959  | 0.10704827 | 0.289557159  | 0.772389 | 0.80086 | -7.30059543 |
| NTAN1    | -0.017668273 | 3.50491462 | -0.28911587  | 0.772726 | 0.80116 | -7.30072304 |

|         |              |            |              |          |         |             |
|---------|--------------|------------|--------------|----------|---------|-------------|
| BATF2   | -0.035928042 | 2.3401306  | -0.288549336 | 0.77316  | 0.80156 | -7.30088658 |
| TXNDC1  | -0.020221651 | 2.38237756 | -0.288449355 | 0.773236 | 0.80159 | -7.30091541 |
| COL4A4  | 0.030309962  | 3.59023223 | 0.288218575  | 0.773412 | 0.80173 | -7.30098192 |
| SLC19A2 | -0.027514255 | 4.0168155  | -0.288028827 | 0.773558 | 0.80179 | -7.30103656 |
| ANKRD2  | -0.022090418 | 4.02108204 | -0.288020186 | 0.773564 | 0.80179 | -7.30103905 |
| ARNT2   | -0.036506888 | 3.9175561  | -0.28790083  | 0.773655 | 0.80183 | -7.3010734  |
| HACE1   | -0.018957172 | 2.10199047 | -0.287416352 | 0.774026 | 0.80217 | -7.30121269 |
| HSD17B  | 0.0032339    | 0.02453194 | 0.287210627  | 0.774183 | 0.80228 | -7.30127176 |
| CNIH2   | -0.013868492 | 0.81729308 | -0.286278755 | 0.774896 | 0.80297 | -7.30153883 |
| ASIP    | -0.027128812 | 1.15460198 | -0.286043762 | 0.775076 | 0.80311 | -7.30160604 |
| GTF2H4  | 0.020446108  | 2.38785311 | 0.284793716  | 0.776032 | 0.80405 | -7.30196263 |
| ANAPC1  | -0.017311687 | 1.8794325  | -0.283081097 | 0.777343 | 0.80536 | -7.30244864 |
| PIF1    | -0.012493891 | 0.51714777 | -0.282077597 | 0.778112 | 0.80611 | -7.30273206 |
| CNGB3   | -0.001739164 | 0.02667485 | -0.281265269 | 0.778734 | 0.8067  | -7.30296075 |
| FANCB   | 0.006829224  | 0.40892807 | 0.281148426  | 0.778823 | 0.80674 | -7.30299359 |
| EFR3A   | -0.026308198 | 6.02977067 | -0.280911969 | 0.779005 | 0.80684 | -7.30306    |
| PPP1R3  | -0.026900935 | 1.30755439 | -0.28090713  | 0.779008 | 0.80684 | -7.30306136 |
| SORL1   | -0.035423578 | 3.70750748 | -0.280375477 | 0.779416 | 0.80721 | -7.30321049 |
| CCNL2   | 0.030498331  | 5.5005186  | 0.279062139  | 0.780422 | 0.8082  | -7.30357766 |
| PCDHB3  | -0.014720474 | 0.59456344 | -0.278918369 | 0.780532 | 0.80827 | -7.30361775 |
| LILRB5  | 0.015841133  | 0.6834067  | 0.278517579  | 0.78084  | 0.80852 | -7.3037294  |
| APCDD1  | 0.027847847  | 2.48684096 | 0.278470256  | 0.780876 | 0.80852 | -7.30374257 |
| CRMP1   | -0.01805378  | 2.96073183 | -0.277918327 | 0.781299 | 0.80891 | -7.30389603 |
| PTP4A1  | -0.025126697 | 6.02300149 | -0.277635295 | 0.781516 | 0.80909 | -7.30397461 |
| FAT2    | -0.023158668 | 0.74852184 | -0.275243385 | 0.783351 | 0.81092 | -7.30463549 |
| SLC30A3 | -0.047755571 | 1.09552587 | -0.27514893  | 0.783424 | 0.81092 | -7.30466147 |
| CAD     | 0.023200121  | 4.04300214 | 0.275137709  | 0.783432 | 0.81092 | -7.30466455 |
| LHB     | -0.018610231 | 0.55397227 | -0.274877833 | 0.783632 | 0.81108 | -7.30473598 |
| RBPJ    | -0.014846381 | 4.7909614  | -0.274491229 | 0.783928 | 0.81129 | -7.30484212 |
| SLC39A1 | -0.034730912 | 5.77069512 | -0.274483535 | 0.783934 | 0.81129 | -7.30484423 |
| GLCE    | 0.024834387  | 3.12838393 | 0.27422125   | 0.784136 | 0.81145 | -7.30491615 |
| EGR3    | -0.048102746 | 2.64439679 | -0.273536698 | 0.784661 | 0.81195 | -7.30510354 |
| MREG    | -0.025823859 | 3.77869017 | -0.272790247 | 0.785234 | 0.81249 | -7.30530734 |
| EFS     | -0.034268456 | 3.48746797 | -0.272581684 | 0.785394 | 0.81261 | -7.30536418 |
| GPR137  | -0.016100347 | 0.98936617 | -0.272421655 | 0.785517 | 0.81268 | -7.30540777 |
| TAB3    | 0.019008088  | 2.98045161 | 0.272363376  | 0.785562 | 0.81268 | -7.30542364 |
| TLCD1   | -0.022910865 | 4.37722661 | -0.272074254 | 0.785784 | 0.81286 | -7.3055023  |
| RRP1B   | 0.016917852  | 4.18866667 | 0.271295672  | 0.786382 | 0.81343 | -7.30571372 |
| CAPN2   | 0.021530301  | 6.4755414  | 0.27053801   | 0.786964 | 0.81398 | -7.30591888 |
| BICDL2  | -0.027405672 | 3.70860018 | -0.26985656  | 0.787488 | 0.81448 | -7.30610291 |

|         |              |            |              |          |         |             |
|---------|--------------|------------|--------------|----------|---------|-------------|
| GPR156  | -0.005040507 | 0.15111257 | -0.26755615  | 0.789256 | 0.81625 | -7.30672074 |
| DENND1  | -0.022589631 | 3.90367509 | -0.26688685  | 0.789771 | 0.81674 | -7.3068995  |
| TNFRSF  | -0.028695908 | 4.42958133 | -0.266199486 | 0.7903   | 0.81723 | -7.30708262 |
| FLCN    | 0.019544125  | 3.72395111 | 0.266107944  | 0.79037  | 0.81726 | -7.30710697 |
| NTSR1   | 0.00286498   | 0.04620371 | 0.264165105  | 0.791865 | 0.81875 | -7.30762183 |
| PARD6B  | -0.024471297 | 3.52515488 | -0.263903158 | 0.792067 | 0.81891 | -7.30769096 |
| GPR35   | 0.012934638  | 0.71367889 | 0.263523962  | 0.792359 | 0.81916 | -7.30779091 |
| MAP3K1  | -0.002838085 | 0.05672256 | -0.262900309 | 0.792839 | 0.81961 | -7.30795498 |
| MND1    | -0.017881284 | 1.47741265 | -0.262000882 | 0.793531 | 0.82028 | -7.30819092 |
| SLC8A3  | 0.002687884  | 0.03078713 | 0.261672099  | 0.793784 | 0.82049 | -7.30827697 |
| IZUMO2  | 0.011883877  | 0.23208642 | 0.26105061   | 0.794263 | 0.82093 | -7.30843932 |
| TMC1    | 0.004136097  | 0.09756387 | 0.260944882  | 0.794345 | 0.82097 | -7.3084669  |
| CCIN    | 0.005991998  | 0.1951483  | 0.260652023  | 0.79457  | 0.82115 | -7.30854324 |
| MYO5C   | -0.023223114 | 4.40345098 | -0.259568008 | 0.795405 | 0.82196 | -7.30882507 |
| GLI1    | -0.0125939   | 0.36941694 | -0.259287502 | 0.795622 | 0.82214 | -7.3088978  |
| AICDA   | -0.010677194 | 0.10966657 | -0.259123719 | 0.795748 | 0.82218 | -7.30894024 |
| CHML    | -0.020539245 | 2.62888424 | -0.259107144 | 0.795761 | 0.82218 | -7.30894453 |
| TACC1   | 0.024743909  | 4.54618947 | 0.258772788  | 0.796018 | 0.8224  | -7.30903106 |
| MAP7D2  | -0.017890708 | 0.56594774 | -0.2571068   | 0.797303 | 0.82367 | -7.30946058 |
| B4GALN  | -0.017595818 | 0.30009888 | -0.257022278 | 0.797368 | 0.82369 | -7.3094823  |
| GRIA3   | 0.028503006  | 0.49825503 | 0.255181056  | 0.798788 | 0.82511 | -7.30995361 |
| MAST1   | -0.009891726 | 0.35401431 | -0.254139968 | 0.799591 | 0.82584 | -7.31021861 |
| SRRM2   | -0.022118218 | 6.82712446 | -0.254135641 | 0.799595 | 0.82584 | -7.31021971 |
| KIF2A   | -0.025435624 | 3.29238424 | -0.253375588 | 0.800181 | 0.82639 | -7.31041249 |
| DNAH5   | 0.017236257  | 0.60519878 | 0.252465442  | 0.800884 | 0.82707 | -7.31064257 |
| KIF27   | 0.021508473  | 2.26550029 | 0.252174309  | 0.801109 | 0.82725 | -7.310716   |
| MSMO1   | -0.021542621 | 5.55021973 | -0.25133951  | 0.801753 | 0.82787 | -7.31092607 |
| NAF1    | -0.01894214  | 2.95163549 | -0.251096382 | 0.801941 | 0.82801 | -7.31098711 |
| AKAP5   | 0.013207765  | 0.98612503 | 0.250920465  | 0.802077 | 0.8281  | -7.31103125 |
| SLC4A9  | 0.010017466  | 0.20462524 | 0.250667423  | 0.802272 | 0.82821 | -7.31109468 |
| ITIH2   | 0.007617968  | 0.33397647 | 0.250652992  | 0.802283 | 0.82821 | -7.3110983  |
| CIC     | 0.019798085  | 5.18219407 | 0.250010179  | 0.80278  | 0.82867 | -7.31125914 |
| ASB11   | 0.003293309  | 0.03486946 | 0.249908953  | 0.802858 | 0.8287  | -7.31128443 |
| PCDHGE  | -0.020922564 | 0.71640426 | -0.24984091  | 0.802911 | 0.82871 | -7.31130142 |
| EPN2    | -0.017151221 | 3.82207088 | -0.248682313 | 0.803806 | 0.82958 | -7.31159008 |
| C5orf46 | 0.013337346  | 0.30276011 | 0.248378591  | 0.80404  | 0.82976 | -7.31166553 |
| NIN     | 0.017174884  | 2.82350663 | 0.248338564  | 0.804071 | 0.82976 | -7.31167547 |
| ZNF81   | -0.01536146  | 1.38914066 | -0.247950928 | 0.804371 | 0.83001 | -7.31177161 |
| ACAP1   | -0.020303046 | 2.5882452  | -0.247892265 | 0.804416 | 0.83001 | -7.31178615 |
| FMO2    | 0.024140969  | 0.97785038 | 0.247422342  | 0.80478  | 0.83033 | -7.31190248 |

|           |              |            |              |          |         |             |
|-----------|--------------|------------|--------------|----------|---------|-------------|
| PKD2L1    | 0.01036171   | 0.23810532 | 0.246225123  | 0.805705 | 0.83124 | -7.31219784 |
| ABRAXA    | -0.016312789 | 2.20969197 | -0.246050848 | 0.80584  | 0.83133 | -7.31224072 |
| SLC22A10  | 0.002082121  | 0.04983011 | 0.24551901   | 0.806251 | 0.8317  | -7.31237138 |
| ST6GAL1   | -0.026656931 | 3.61402401 | -0.24538751  | 0.806353 | 0.83176 | -7.31240364 |
| SYNPR     | 0.035988405  | 0.81331748 | 0.245173314  | 0.806518 | 0.83188 | -7.31245615 |
| MAPK15    | 0.037593447  | 3.32735311 | 0.244911776  | 0.806721 | 0.83203 | -7.31252021 |
| TUT7      | 0.01657016   | 3.42225412 | 0.244769026  | 0.806831 | 0.8321  | -7.31255515 |
| EFNA1     | -0.021582636 | 6.50060931 | -0.24460958  | 0.806955 | 0.83217 | -7.31259415 |
| NUTM2G    | -0.003878737 | 0.18615484 | -0.243251299 | 0.808005 | 0.83321 | -7.31292532 |
| KIAA1211  | -0.001843741 | 0.0163957  | -0.242780929 | 0.808369 | 0.83353 | -7.31303958 |
| NLGN3     | -0.010701032 | 0.47265378 | -0.242404199 | 0.808661 | 0.83378 | -7.31313093 |
| ANKS6     | -0.019544232 | 4.5789771  | -0.24077144  | 0.809925 | 0.83502 | -7.3135252  |
| GSTCD     | 0.020276131  | 2.41813944 | 0.240721204  | 0.809964 | 0.83502 | -7.31353729 |
| ZNF703    | -0.017647632 | 3.71963411 | -0.240439704 | 0.810182 | 0.8352  | -7.31360499 |
| PIK3R1    | -0.02390896  | 4.35626108 | -0.240135198 | 0.810417 | 0.83536 | -7.31367812 |
| AQP5      | -0.061870374 | 3.67016317 | -0.240109064 | 0.810438 | 0.83536 | -7.31368439 |
| NR4A2     | 0.039472977  | 3.4925226  | 0.239868873  | 0.810624 | 0.8355  | -7.31374201 |
| CES4A     | 0.026792706  | 2.78267203 | 0.238716566  | 0.811516 | 0.83637 | -7.31401763 |
| CCNL1     | -0.022457512 | 4.60490192 | -0.238477802 | 0.811701 | 0.83651 | -7.31407457 |
| ABCC2     | -0.00423613  | 0.23240171 | -0.237675803 | 0.812322 | 0.8371  | -7.31426542 |
| ZNF141    | 0.015928083  | 2.34277409 | 0.237519362  | 0.812444 | 0.83717 | -7.31430258 |
| BGLAP     | 0.021074355  | 1.48774261 | 0.236744185  | 0.813044 | 0.83773 | -7.31448632 |
| DEF6      | 0.025389235  | 4.00357758 | 0.236694011  | 0.813083 | 0.83773 | -7.31449819 |
| ISY1-RAI0 | 0.00140636   | 0.02592416 | 0.235964634  | 0.813649 | 0.83826 | -7.31467048 |
| TMEM19    | -0.015035883 | 0.20222466 | -0.23587047  | 0.813722 | 0.83829 | -7.31469269 |
| ECT2      | -0.017733573 | 2.28864337 | -0.234189076 | 0.815025 | 0.83958 | -7.31508769 |
| EIF4EBP   | 0.022078853  | 4.48313779 | 0.233962626  | 0.815201 | 0.83971 | -7.31514068 |
| SNAPC2    | 0.017060071  | 5.01795028 | 0.233873127  | 0.81527  | 0.83973 | -7.3151616  |
| C11orf42  | -0.008259043 | 0.35348586 | -0.233737044 | 0.815376 | 0.83979 | -7.31519341 |
| RAB33A    | 0.017341     | 1.08953224 | 0.233427851  | 0.815616 | 0.83998 | -7.3152656  |
| MAPK8IF   | 0.022453789  | 3.80985187 | 0.231922028  | 0.816784 | 0.84113 | -7.31561581 |
| ZNF738    | -0.014944528 | 2.09915185 | -0.230877345 | 0.817594 | 0.84192 | -7.31585745 |
| RIPPLY1   | 0.014210506  | 0.44043831 | 0.230675927  | 0.817751 | 0.84203 | -7.31590391 |
| C10orf11  | -0.006752346 | 0.15494732 | -0.230115252 | 0.818186 | 0.84242 | -7.31603303 |
| OSR1      | 0.01467044   | 0.49657176 | 0.22998516   | 0.818287 | 0.84248 | -7.31606295 |
| ASAH2     | 0.007641423  | 0.42165092 | 0.229755638  | 0.818465 | 0.84258 | -7.31611568 |
| PITPNM3   | -0.021967646 | 2.35215815 | -0.229623414 | 0.818568 | 0.84258 | -7.31614604 |
| HP        | -0.024085114 | 0.53248494 | -0.229605964 | 0.818581 | 0.84258 | -7.31615005 |
| SLC22A2   | -0.002280742 | 0.0268414  | -0.229573525 | 0.818606 | 0.84258 | -7.31615749 |
| MYO1C     | 0.016297489  | 6.5429474  | 0.229530613  | 0.81864  | 0.84258 | -7.31616734 |



|          |              |            |              |          |         |             |
|----------|--------------|------------|--------------|----------|---------|-------------|
| ZNF213   | -0.012689983 | 3.78699497 | -0.229398383 | 0.818742 | 0.84264 | -7.31619767 |
| PLA1A    | -0.027156057 | 2.32476703 | -0.229013822 | 0.819041 | 0.84289 | -7.31628577 |
| GPR85    | -0.010910127 | 0.46158784 | -0.228337872 | 0.819566 | 0.84338 | -7.31644028 |
| LCN12    | -0.034160764 | 6.73606932 | -0.227611542 | 0.82013  | 0.84391 | -7.3166058  |
| PTPN12   | 0.016461698  | 5.22709169 | 0.227047494  | 0.820568 | 0.84431 | -7.31673397 |
| FIGNL2   | 0.014843242  | 0.66779803 | 0.226856136  | 0.820717 | 0.84441 | -7.31677738 |
| PCSK1    | 0.006676877  | 0.22326729 | 0.226670042  | 0.820861 | 0.84451 | -7.31681956 |
| RASA4    | -0.007193403 | 0.46000344 | -0.22446748  | 0.822572 | 0.84622 | -7.31731618 |
| HSF5     | 0.002495666  | 0.05925543 | 0.223534296  | 0.823298 | 0.8469  | -7.31752512 |
| GRHL1    | 0.018970021  | 2.18902908 | 0.223486289  | 0.823335 | 0.8469  | -7.31753585 |
| PRF1     | 0.029044726  | 2.43975604 | 0.222956904  | 0.823747 | 0.84724 | -7.31765397 |
| YPEL2    | 0.016775434  | 3.91770015 | 0.222939287  | 0.82376  | 0.84724 | -7.3176579  |
| LMOD3    | 0.006916156  | 0.15540898 | 0.222385571  | 0.824191 | 0.84763 | -7.31778114 |
| L3MBTL3  | 0.020002054  | 2.95146659 | 0.22206455   | 0.824441 | 0.84783 | -7.31785245 |
| PRRC2B   | 0.028234717  | 4.90838081 | 0.221037875  | 0.825239 | 0.8486  | -7.31807981 |
| MAD2L2   | 0.016197865  | 4.559971   | 0.219574319  | 0.826378 | 0.84972 | -7.31840211 |
| PIGA     | 0.01748126   | 3.23597588 | 0.219299835  | 0.826591 | 0.84989 | -7.31846232 |
| ARHGAP   | -0.015906628 | 6.07063811 | -0.218532321 | 0.827188 | 0.85045 | -7.31863027 |
| RGPD6    | -0.001074907 | 0.01035943 | -0.218221767 | 0.82743  | 0.85065 | -7.31869806 |
| GDPD4    | -0.009529071 | 0.09906939 | -0.217026173 | 0.828361 | 0.85156 | -7.31895815 |
| PCDHA1   | 0.018325116  | 0.94662785 | 0.216574959  | 0.828712 | 0.85187 | -7.31905593 |
| C9       | -0.002470598 | 0.07044563 | -0.21594104  | 0.829206 | 0.85232 | -7.31919296 |
| POLE2    | 0.011802712  | 1.71118422 | 0.214898317  | 0.830018 | 0.8531  | -7.3194175  |
| C18orf54 | -0.008323003 | 0.95783455 | -0.214641273 | 0.830218 | 0.85326 | -7.31947268 |
| PEA15    | 0.014314497  | 7.80594295 | 0.214545543  | 0.830292 | 0.85328 | -7.31949321 |
| IL17REL  | 0.004209425  | 0.08635129 | 0.213058486  | 0.831451 | 0.85442 | -7.31981102 |
| ENC1     | -0.026934491 | 3.14796638 | -0.212773632 | 0.831673 | 0.8546  | -7.31987165 |
| GEM      | -0.030479077 | 3.30019233 | -0.21220072  | 0.832119 | 0.85499 | -7.31999334 |
| C5orf67  | 0.022037587  | 1.75091597 | 0.212155581  | 0.832154 | 0.85499 | -7.32000291 |
| TOX      | -0.025670495 | 1.39851621 | -0.211751786 | 0.832469 | 0.85522 | -7.32008846 |
| FUT8     | 0.017628276  | 3.66972197 | 0.211725089  | 0.83249  | 0.85522 | -7.32009411 |
| SPEN     | 0.019206864  | 4.53912827 | 0.211672512  | 0.832531 | 0.85522 | -7.32010524 |
| CLDN6    | -0.016083516 | 0.67998193 | -0.210704412 | 0.833285 | 0.85594 | -7.32030961 |
| CCDC15   | 0.016658094  | 1.13907578 | 0.210617285  | 0.833353 | 0.85596 | -7.32032796 |
| MAP3K2I  | 0.020070751  | 3.47870604 | 0.209700082  | 0.834068 | 0.85662 | -7.32052064 |
| CAPN5    | 0.02684638   | 2.82683642 | 0.209667997  | 0.834093 | 0.85662 | -7.32052736 |
| TCF19    | -0.016205265 | 3.14970111 | -0.209578297 | 0.834163 | 0.85664 | -7.32054616 |
| ZNF600   | -0.009974996 | 2.02746449 | -0.209497695 | 0.834226 | 0.85665 | -7.32056304 |
| TPBG     | -0.01992431  | 3.38889519 | -0.208374422 | 0.835102 | 0.8575  | -7.32079764 |
| RHOXF1   | 0.018424282  | 0.94654481 | 0.208210828  | 0.83523  | 0.85758 | -7.3208317  |

|         |              |            |              |          |         |             |
|---------|--------------|------------|--------------|----------|---------|-------------|
| CCL25   | -0.011905931 | 0.50900162 | -0.207575231 | 0.835726 | 0.85804 | -7.32096379 |
| SHD     | -0.006141386 | 0.06098483 | -0.207153208 | 0.836055 | 0.85832 | -7.32105127 |
| GPR27   | 0.029096007  | 4.45347924 | 0.207004211  | 0.836171 | 0.85839 | -7.32108211 |
| BAIAP2  | -0.018573106 | 4.32212    | -0.206787121 | 0.83634  | 0.85851 | -7.32112701 |
| CENPH   | 0.013175619  | 2.52220783 | 0.206115885  | 0.836864 | 0.85898 | -7.32126553 |
| NUDT1   | 0.01534913   | 3.65977208 | 0.206061449  | 0.836907 | 0.85898 | -7.32127674 |
| AMMECF  | 0.014604341  | 2.58998929 | 0.206005961  | 0.83695  | 0.85898 | -7.32128817 |
| KIF13B  | -0.017272871 | 4.42745983 | -0.205012785 | 0.837725 | 0.85972 | -7.3214922  |
| HIST1H1 | 0.019189371  | 0.93363666 | 0.204685861  | 0.83798  | 0.85991 | -7.32155914 |
| KCNG3   | -0.004292139 | 0.04491213 | -0.204650274 | 0.838008 | 0.85991 | -7.32156643 |
| PXDN    | -0.022682966 | 3.08863193 | -0.20410447  | 0.838434 | 0.8603  | -7.32167793 |
| MATN4   | 0.007819822  | 0.28620315 | 0.203964426  | 0.838543 | 0.86031 | -7.3217065  |
| B4GALT  | -0.018691131 | 7.21715422 | -0.20395182  | 0.838553 | 0.86031 | -7.32170907 |
| SOCS3   | 0.035526587  | 5.66443484 | 0.203755145  | 0.838707 | 0.86038 | -7.32174914 |
| ITPR2   | -0.020936173 | 3.5624281  | -0.203739164 | 0.838719 | 0.86038 | -7.3217524  |
| CRYBG1  | 0.021075135  | 3.39369163 | 0.202346662  | 0.839806 | 0.86144 | -7.32203503 |
| TNIK    | -0.021643212 | 4.11767377 | -0.202104858 | 0.839995 | 0.86158 | -7.32208391 |
| MGARP   | 0.011393267  | 1.03998712 | 0.201505441  | 0.840463 | 0.86201 | -7.32220483 |
| TRIM34  | -0.006185223 | 0.56589127 | -0.200143169 | 0.841527 | 0.86303 | -7.3224783  |
| ENOX1   | -0.010147382 | 0.68962231 | -0.200102993 | 0.841559 | 0.86303 | -7.32248634 |
| ERVFRD  | 0.001432717  | 0.04233147 | 0.199186415  | 0.842275 | 0.86371 | -7.32266926 |
| BRPF3   | -0.019503287 | 4.74476912 | -0.198631902 | 0.842708 | 0.86408 | -7.32277951 |
| TTC39A  | 0.019434408  | 3.08564461 | 0.198602356  | 0.842731 | 0.86408 | -7.32278538 |
| RPL3L   | -0.007232796 | 0.1142869  | -0.198521432 | 0.842795 | 0.86409 | -7.32280144 |
| GGT6    | 0.039315573  | 2.30524747 | 0.198442445  | 0.842856 | 0.8641  | -7.32281711 |
| ANKLE1  | 0.006321974  | 0.43216855 | 0.198337426  | 0.842938 | 0.86413 | -7.32283794 |
| EEF2K   | -0.012545286 | 3.70894188 | -0.198052136 | 0.843161 | 0.86431 | -7.32289446 |
| HOXC9   | -0.013192136 | 0.39005199 | -0.197737346 | 0.843407 | 0.86451 | -7.32295674 |
| SLC8A2  | 0.005526447  | 0.15548832 | 0.197566161  | 0.843541 | 0.86459 | -7.32299056 |
| FOXM1   | 0.014646063  | 1.48821343 | 0.196545044  | 0.844339 | 0.86532 | -7.3231917  |
| PNCK    | -0.004303936 | 0.1142791  | -0.196532664 | 0.844349 | 0.86532 | -7.32319413 |
| LRRC74/ | -0.002124352 | 0.06692581 | -0.195683444 | 0.845013 | 0.86586 | -7.32336061 |
| CPSF1   | 0.014552672  | 5.42521055 | 0.19566719   | 0.845026 | 0.86586 | -7.32336379 |
| NRROS   | 0.016225482  | 2.86718635 | 0.195628653  | 0.845056 | 0.86586 | -7.32337132 |
| CDK2    | 0.013422144  | 3.89254491 | 0.195588729  | 0.845087 | 0.86586 | -7.32337913 |
| ERICH6E | -0.004518432 | 0.28821549 | -0.194960728 | 0.845578 | 0.86632 | -7.32350172 |
| ERN2    | -0.004119842 | 0.0933217  | -0.194530249 | 0.845915 | 0.86661 | -7.32358552 |
| NPW     | 0.036365022  | 1.76044182 | 0.193928139  | 0.846386 | 0.86701 | -7.32370243 |
| CASP8   | 0.014872215  | 2.95106452 | 0.193896499  | 0.846411 | 0.86701 | -7.32370856 |
| PDE4DIF | 0.013775507  | 2.60899926 | 0.1937175    | 0.846551 | 0.8671  | -7.32374324 |

|         |              |            |              |          |         |             |
|---------|--------------|------------|--------------|----------|---------|-------------|
| NCEH1   | -0.015510469 | 3.4475348  | -0.192531432 | 0.847478 | 0.868   | -7.32397221 |
| ACTN4   | 0.013549046  | 8.03575418 | 0.192374249  | 0.847601 | 0.86806 | -7.32400245 |
| HORMA1  | -0.013997821 | 0.28273397 | -0.192319715 | 0.847644 | 0.86806 | -7.32401294 |
| ZNF514  | -0.014408687 | 3.01645227 | -0.191882273 | 0.847986 | 0.86836 | -7.32409694 |
| ZYG11B  | 0.015575312  | 4.60473876 | 0.191440584  | 0.848332 | 0.86863 | -7.32418156 |
| SNX33   | 0.01365065   | 4.55532549 | 0.191414423  | 0.848353 | 0.86863 | -7.32418657 |
| TNIP1   | 0.010523189  | 6.30499707 | 0.191157996  | 0.848553 | 0.86879 | -7.3242356  |
| FBLL1   | 0.022457733  | 1.41548718 | 0.190874762  | 0.848775 | 0.86895 | -7.32428968 |
| ADAR    | 0.01544971   | 6.55617357 | 0.190817651  | 0.84882  | 0.86895 | -7.32430058 |
| CALN1   | -0.010653135 | 0.10951555 | -0.190043328 | 0.849426 | 0.86952 | -7.32444798 |
| AGAP9   | -0.01627334  | 1.85139783 | -0.189094171 | 0.850169 | 0.87023 | -7.32462785 |
| BAALC   | -0.01992466  | 1.1715016  | -0.188439909 | 0.850681 | 0.8707  | -7.3247513  |
| AHI1    | -0.013729378 | 2.96162919 | -0.188369541 | 0.850736 | 0.87071 | -7.32476456 |
| KCNQ4   | -0.005145883 | 0.4818629  | -0.187479942 | 0.851433 | 0.87137 | -7.32493168 |
| MTRNR2  | -0.054064723 | 1.44152307 | -0.186219687 | 0.85242  | 0.87232 | -7.32516707 |
| GNRH1   | -0.013595411 | 1.35532351 | -0.186159882 | 0.852467 | 0.87232 | -7.3251782  |
| ACTB    | 0.010239011  | 11.5337984 | 0.185795019  | 0.852753 | 0.87251 | -7.32524603 |
| CNTN6   | -0.033391754 | 2.67071028 | -0.185784786 | 0.852761 | 0.87251 | -7.32524793 |
| RELA    | -0.011101581 | 5.57035412 | -0.18494596  | 0.853418 | 0.87313 | -7.32540337 |
| LRRC55  | -0.006209646 | 0.30753894 | -0.184137809 | 0.854051 | 0.87373 | -7.32555245 |
| UBA6    | -0.0115637   | 3.1979969  | -0.182357312 | 0.855447 | 0.87508 | -7.32587861 |
| RGPD3   | -0.003417422 | 0.11389846 | -0.182319526 | 0.855476 | 0.87508 | -7.3258855  |
| EXTL1   | 0.0112774    | 0.82841955 | 0.18214779   | 0.855611 | 0.87517 | -7.32591678 |
| CA7     | -0.018027574 | 1.03991185 | -0.18160672  | 0.856035 | 0.87553 | -7.32601515 |
| RPL36A  | -0.004062067 | 0.2446491  | -0.18156239  | 0.85607  | 0.87553 | -7.3260232  |
| RFX2    | 0.014845701  | 2.05094754 | 0.181501069  | 0.856118 | 0.87553 | -7.32603433 |
| PIMREG  | 0.011321838  | 0.86655526 | 0.181382384  | 0.856211 | 0.87557 | -7.32605586 |
| ELMOD1  | -0.00592711  | 0.11190853 | -0.181190058 | 0.856362 | 0.87564 | -7.32609071 |
| TGFB1   | -0.021026968 | 5.88769859 | -0.181161398 | 0.856384 | 0.87564 | -7.3260959  |
| XYLT1   | -0.017160722 | 2.41155435 | -0.180367662 | 0.857007 | 0.87622 | -7.32623933 |
| BLK     | -0.016452473 | 0.53534673 | -0.179089091 | 0.858009 | 0.8771  | -7.32646905 |
| SEC31B  | -0.014690273 | 1.61279564 | -0.179026682 | 0.858058 | 0.8771  | -7.32648022 |
| RGPD1   | 0.001829778  | 0.03753103 | 0.178978158  | 0.858096 | 0.8771  | -7.3264889  |
| MYO15B  | 0.022802067  | 3.53844416 | 0.178916841  | 0.858144 | 0.8771  | -7.32649987 |
| CCDC11  | -0.011950618 | 1.14388245 | -0.178894548 | 0.858162 | 0.8771  | -7.32650385 |
| FAM160E | -0.013281321 | 4.19313546 | -0.178878666 | 0.858174 | 0.8771  | -7.32650669 |
| MCL1    | 0.016689174  | 7.98355689 | 0.178490558  | 0.858479 | 0.87736 | -7.32657602 |
| PCDHB1  | -0.012058082 | 1.05480704 | -0.177843384 | 0.858986 | 0.87783 | -7.32669128 |
| ZNF560  | -0.019987114 | 0.71409783 | -0.177000225 | 0.859648 | 0.87845 | -7.32684083 |
| RNPC3   | -0.015652865 | 3.05021415 | -0.176608401 | 0.859956 | 0.87871 | -7.32691008 |

|          |              |            |              |          |         |             |
|----------|--------------|------------|--------------|----------|---------|-------------|
| ANXA4    | -0.014377638 | 4.94124583 | -0.175959464 | 0.860465 | 0.87918 | -7.32702444 |
| BCAN     | -0.016100845 | 0.25785486 | -0.175527813 | 0.860804 | 0.87943 | -7.32710027 |
| FMN1     | -0.016002324 | 1.76784892 | -0.175515552 | 0.860813 | 0.87943 | -7.32710242 |
| FXYP7    | -0.00667991  | 0.36353943 | -0.175349675 | 0.860943 | 0.87951 | -7.32713151 |
| ATP12A   | 0.010886747  | 0.24334241 | 0.175067671  | 0.861165 | 0.87964 | -7.32718091 |
| AWAT2    | -0.005801005 | 0.24884382 | -0.175054674 | 0.861175 | 0.87964 | -7.32718318 |
| SHISAL2  | 0.012588693  | 1.0648876  | 0.173575342  | 0.862336 | 0.88077 | -7.32744096 |
| UTS2     | 0.011341807  | 0.34073056 | 0.173441664  | 0.862441 | 0.88083 | -7.32746415 |
| EP400    | -0.012341529 | 3.42872894 | -0.173267406 | 0.862578 | 0.88091 | -7.32749435 |
| ACAN     | -0.014619136 | 0.76901436 | -0.171131963 | 0.864255 | 0.88257 | -7.32786195 |
| TERB1    | 0.00286977   | 0.15781393 | 0.170802248  | 0.864514 | 0.88278 | -7.3279183  |
| FAM126A  | 0.01037847   | 1.47618633 | 0.170696627  | 0.864597 | 0.88281 | -7.32793633 |
| RBFOX1   | -0.020214138 | 0.49809126 | -0.170285165 | 0.86492  | 0.88309 | -7.32800645 |
| TCP11L2  | 0.015959425  | 2.01279325 | 0.17020014   | 0.864987 | 0.88311 | -7.32802092 |
| PCDHGA   | -0.009207095 | 0.56912193 | -0.169461774 | 0.865567 | 0.88365 | -7.32814628 |
| ALDH1L2  | -0.014073491 | 1.13028515 | -0.16938334  | 0.865629 | 0.88366 | -7.32815956 |
| PRKD2    | -0.011880483 | 5.39390731 | -0.168480274 | 0.866338 | 0.88431 | -7.32831207 |
| PDE6C    | 0.005184153  | 0.38430716 | 0.16843011   | 0.866378 | 0.88431 | -7.32832052 |
| INPP4B   | -0.011673489 | 1.65410151 | -0.16824126  | 0.866526 | 0.88441 | -7.3283523  |
| PCBP3    | 0.005159208  | 0.24595074 | 0.167779235  | 0.866889 | 0.88473 | -7.3284299  |
| KLHL38   | 0.003551449  | 0.15301992 | 0.166887247  | 0.86759  | 0.88539 | -7.3285791  |
| NHLH1    | 0.002519939  | 0.13753473 | 0.166748668  | 0.867699 | 0.88545 | -7.32860221 |
| C21orf58 | 0.010220222  | 1.67716427 | 0.166661467  | 0.867768 | 0.88547 | -7.32861675 |
| ZBTB34   | 0.011752344  | 2.93100361 | 0.165951328  | 0.868326 | 0.88598 | -7.32873481 |
| DNMBP    | -0.013281063 | 3.49007906 | -0.165820036 | 0.868429 | 0.88603 | -7.32875658 |
| NCOA2    | -0.01495305  | 3.94926689 | -0.165375472 | 0.868779 | 0.88634 | -7.32883018 |
| NAB1     | -0.014860083 | 5.45747459 | -0.164496356 | 0.86947  | 0.88694 | -7.32897513 |
| INPP5F   | 0.015950855  | 4.17865812 | 0.164490403  | 0.869475 | 0.88694 | -7.3289761  |
| A1BG     | -0.005149483 | 0.44093703 | -0.164249578 | 0.869664 | 0.88708 | -7.32901568 |
| KLK4     | 0.030674683  | 1.27335434 | 0.164152939  | 0.86974  | 0.8871  | -7.32903154 |
| FRG2C    | -0.001766539 | 0.04850083 | -0.1639531   | 0.869897 | 0.88721 | -7.32906431 |
| OMP      | 0.004437125  | 0.14702856 | 0.163434687  | 0.870305 | 0.88757 | -7.32914915 |
| AKR1D1   | -0.002691554 | 0.11749222 | -0.16303081  | 0.870623 | 0.88784 | -7.32921505 |
| FAM217A  | -0.001366549 | 0.04987404 | -0.162840093 | 0.870773 | 0.88794 | -7.32924611 |
| MPO      | 0.002819085  | 0.136871   | 0.16240404   | 0.871116 | 0.88816 | -7.329317   |
| LRIT3    | -0.003872337 | 0.24435411 | -0.162403767 | 0.871116 | 0.88816 | -7.32931705 |
| UBXN7    | -0.013391469 | 3.79567805 | -0.162366073 | 0.871146 | 0.88816 | -7.32932317 |
| FAM209A  | 0.002944092  | 0.15365472 | 0.162096293  | 0.871358 | 0.88833 | -7.32936692 |
| TTC6     | -0.000997353 | 0.01299183 | -0.161722359 | 0.871652 | 0.88857 | -7.32942744 |
| SEMA4F   | -0.011080209 | 2.74661787 | -0.161281559 | 0.871999 | 0.88885 | -7.32949861 |

|         |              |            |              |          |         |             |
|---------|--------------|------------|--------------|----------|---------|-------------|
| PCDH8   | -0.012825404 | 0.94744717 | -0.161245643 | 0.872027 | 0.88885 | -7.3295044  |
| GRAMD10 | 0.016285308  | 2.45899321 | 0.160975399  | 0.87224  | 0.88901 | -7.32954793 |
| PRKCG   | -0.007033312 | 0.08829587 | -0.159942432 | 0.873052 | 0.88979 | -7.32971362 |
| DDX39B  | -0.015917474 | 4.67105593 | -0.159094326 | 0.87372  | 0.89041 | -7.32984887 |
| PRPH    | -0.01040927  | 0.51792152 | -0.158843347 | 0.873917 | 0.89056 | -7.32988875 |
| ERVW-1  | -0.001976384 | 0.0901031  | -0.156741115 | 0.875572 | 0.89219 | -7.33022036 |
| MFSD2B  | 0.002635573  | 0.19791143 | 0.156313562  | 0.875909 | 0.89248 | -7.33028726 |
| NPEPPS  | -0.012109025 | 4.62775415 | -0.155537438 | 0.87652  | 0.89305 | -7.33040824 |
| CMA1    | 0.009803879  | 0.54816144 | 0.155378397  | 0.876645 | 0.89309 | -7.33043296 |
| SSH3    | 0.012177977  | 5.65734121 | 0.155300401  | 0.876707 | 0.89309 | -7.33044507 |
| MOBP    | -0.001671035 | 0.05425602 | -0.155286687 | 0.876718 | 0.89309 | -7.3304472  |
| TRIM55  | -0.011673172 | 1.16972701 | -0.154995871 | 0.876947 | 0.89327 | -7.3304923  |
| NR4A3   | -0.029055858 | 2.00211331 | -0.154193842 | 0.877578 | 0.89386 | -7.33061625 |
| LRCH4   | 0.013114484  | 3.3656257  | 0.153368014  | 0.878229 | 0.89447 | -7.33074321 |
| SLC7A2  | 0.024860304  | 5.87369683 | 0.153040784  | 0.878487 | 0.89468 | -7.33079333 |
| AKIRIN2 | 0.009995465  | 5.81995879 | 0.15294283   | 0.878564 | 0.89471 | -7.33080831 |
| SCARA5  | 0.020876411  | 0.80403029 | 0.152062261  | 0.879257 | 0.89536 | -7.33094256 |
| SPOCK1  | 0.034362961  | 3.66083368 | 0.151397115  | 0.879782 | 0.89584 | -7.33104345 |
| NBEAL1  | 0.011273396  | 1.38933318 | 0.150428549  | 0.880545 | 0.89656 | -7.33118957 |
| COBLL1  | -0.015835046 | 3.21177661 | -0.150294123 | 0.880651 | 0.89658 | -7.33120978 |
| TRIM21  | 0.012374328  | 4.93717913 | 0.150272051  | 0.880668 | 0.89658 | -7.33121309 |
| ARHGAP  | -0.015206553 | 3.03134463 | -0.149715332 | 0.881107 | 0.89697 | -7.33129657 |
| ZHX2    | 0.016113811  | 5.51269866 | 0.149553594  | 0.881234 | 0.89705 | -7.33132077 |
| KDM6B   | -0.011707314 | 4.37733569 | -0.148939547 | 0.881718 | 0.89749 | -7.33141238 |
| CHRNA   | -0.002936126 | 0.0522261  | -0.148827422 | 0.881807 | 0.89752 | -7.33142907 |
| STAR    | -0.002526121 | 0.09635083 | -0.148642763 | 0.881952 | 0.89762 | -7.33145653 |
| FAM135A | -0.008516062 | 1.8584255  | -0.148269828 | 0.882246 | 0.89786 | -7.33151187 |
| ZCCHC1  | 0.003846924  | 0.3318399  | 0.147937196  | 0.882509 | 0.89808 | -7.33156112 |
| LIG1    | 0.010489297  | 3.91726745 | 0.147870924  | 0.882561 | 0.89808 | -7.33157092 |
| MFHAS1  | -0.012202028 | 3.78257458 | -0.147618123 | 0.88276  | 0.89822 | -7.33160826 |
| CD38    | -0.016773412 | 1.11258318 | -0.147127761 | 0.883147 | 0.89856 | -7.3316805  |
| CAMK2N  | 0.016974363  | 1.48544464 | 0.146985884  | 0.883259 | 0.89862 | -7.33170136 |
| ALB     | 0.014185085  | 0.60850982 | 0.146515718  | 0.883629 | 0.89895 | -7.33177034 |
| TFAP2A  | -0.004062583 | 0.35341132 | -0.14629982  | 0.8838   | 0.89902 | -7.33180194 |
| POTEI   | -0.000738953 | 0.009254   | -0.146285661 | 0.883811 | 0.89902 | -7.33180401 |
| RGPD5   | -0.000710417 | 0.00598943 | -0.145930184 | 0.884091 | 0.89925 | -7.33185593 |
| ERC2    | -0.003784544 | 0.38872733 | -0.145260846 | 0.884619 | 0.89974 | -7.33195335 |
| FAM205A | -0.000897819 | 0.02660354 | -0.144964805 | 0.884853 | 0.89992 | -7.3319963  |
| DENND4  | 0.015661822  | 4.08499557 | 0.144859762  | 0.884935 | 0.89992 | -7.33201152 |
| CDRT15  | -0.003058449 | 0.14111985 | -0.144827462 | 0.884961 | 0.89992 | -7.33201619 |

|          |              |            |              |          |         |             |
|----------|--------------|------------|--------------|----------|---------|-------------|
| MGAM2    | -0.000858059 | 0.02151779 | -0.144360881 | 0.885329 | 0.90024 | -7.33208364 |
| ZNF43    | 0.010009213  | 3.07260861 | 0.14427985   | 0.885393 | 0.90025 | -7.33209533 |
| SYCE1L   | -0.019062781 | 3.34522249 | -0.144096203 | 0.885538 | 0.90035 | -7.3321218  |
| KDM4E    | 0.004237106  | 0.17135215 | 0.143834804  | 0.885744 | 0.9005  | -7.33215942 |
| MUSK     | -0.001791023 | 0.05894271 | -0.143130524 | 0.8863   | 0.90101 | -7.33226044 |
| ATG2A    | -0.009503645 | 4.31863634 | -0.143071767 | 0.886346 | 0.90101 | -7.33226885 |
| YWHAH    | -0.011012731 | 6.8650804  | -0.14272053  | 0.886623 | 0.90124 | -7.33231902 |
| ARPP21   | -0.002024599 | 0.02156361 | -0.142386631 | 0.886887 | 0.90145 | -7.33236661 |
| RBSN     | -0.011710919 | 4.24513791 | -0.142267644 | 0.88698  | 0.90149 | -7.33238354 |
| C5orf34  | -0.007009014 | 1.36955544 | -0.141990665 | 0.887199 | 0.90166 | -7.33242289 |
| MEP1B    | -0.001046451 | 0.03341248 | -0.141437642 | 0.887635 | 0.90205 | -7.33250124 |
| CD163L1  | 0.008204933  | 0.67811082 | 0.141348261  | 0.887706 | 0.90207 | -7.33251388 |
| C12orf71 | 0.003013667  | 0.16972857 | 0.141221713  | 0.887806 | 0.90211 | -7.33253175 |
| ELOVL6   | 0.013445475  | 2.14695628 | 0.140918617  | 0.888045 | 0.90225 | -7.33257449 |
| GRK6     | 0.008655759  | 4.29349275 | 0.140915053  | 0.888048 | 0.90225 | -7.332575   |
| MNT      | 0.00959757   | 3.44823742 | 0.140800647  | 0.888138 | 0.90229 | -7.33259111 |
| SH3GL1   | -0.009620785 | 6.22923276 | -0.140288754 | 0.888542 | 0.90265 | -7.33266303 |
| SEPTIN1  | 0.013240978  | 2.57633178 | 0.139905088  | 0.888845 | 0.9029  | -7.33271676 |
| TCF3     | 0.010152329  | 4.96464048 | 0.13873777   | 0.889766 | 0.90378 | -7.33287935 |
| COL17A1  | 0.028184861  | 2.63407989 | 0.138225694  | 0.890171 | 0.90414 | -7.33295024 |
| AGO4     | -0.009390005 | 3.26624024 | -0.137823147 | 0.890488 | 0.90441 | -7.33300578 |
| KMT2D    | 0.012281219  | 3.86153381 | 0.137526434  | 0.890723 | 0.90455 | -7.33304662 |
| TESK2    | 0.010855529  | 2.94372543 | 0.137498885  | 0.890744 | 0.90455 | -7.33305041 |
| ZMIZ2    | 0.007852065  | 5.84951158 | 0.137436615  | 0.890794 | 0.90455 | -7.33305897 |
| TRMT1    | -0.008822768 | 4.68505975 | -0.137337129 | 0.890872 | 0.90458 | -7.33307263 |
| DCAF15   | 0.008799141  | 4.6039443  | 0.137091168  | 0.891066 | 0.90472 | -7.33310637 |
| CEBPE    | -0.003637824 | 0.25077322 | -0.136249892 | 0.891731 | 0.90534 | -7.33322131 |
| AIDA     | 0.01103199   | 3.7721626  | 0.135995938  | 0.891931 | 0.90549 | -7.33325587 |
| KDELR3   | 0.015683127  | 5.0244289  | 0.135818671  | 0.892071 | 0.90554 | -7.33327996 |
| HS2ST1   | -0.011111184 | 4.37618047 | -0.135802194 | 0.892084 | 0.90554 | -7.3332822  |
| ADM      | 0.020657583  | 5.11808636 | 0.135185647  | 0.892571 | 0.90597 | -7.33336571 |
| ZPLD1    | 0.008365426  | 0.21903018 | 0.13512909   | 0.892616 | 0.90597 | -7.33337335 |
| PDE1C    | 0.01351688   | 1.36725855 | 0.135018886  | 0.892703 | 0.906   | -7.33338823 |
| ATG14    | -0.008447762 | 4.15451494 | -0.134359862 | 0.893223 | 0.90648 | -7.33347697 |
| FNIP1    | 0.0101115    | 3.58821028 | 0.132573143  | 0.894635 | 0.90786 | -7.33371537 |
| MIB1     | -0.012548245 | 4.46400167 | -0.132327662 | 0.894829 | 0.908   | -7.33374787 |
| BCAR3    | -0.013042774 | 3.8621293  | -0.131740135 | 0.895293 | 0.90842 | -7.33382542 |
| DSCAM    | 0.000950103  | 0.03360004 | 0.131466509  | 0.895509 | 0.90858 | -7.33386142 |
| KLK14    | -0.007302943 | 0.44999047 | -0.130991339 | 0.895885 | 0.90891 | -7.33392376 |
| SULT1B1  | -0.00566537  | 0.50619053 | -0.129870184 | 0.896771 | 0.90975 | -7.33406995 |

|         |              |            |              |          |         |             |
|---------|--------------|------------|--------------|----------|---------|-------------|
| ZMYND8  | -0.009186913 | 4.26008435 | -0.128656641 | 0.89773  | 0.91067 | -7.33422677 |
| UBE4A   | 0.010924454  | 3.8546627  | 0.127593195  | 0.898571 | 0.91147 | -7.33436299 |
| KCNV2   | -0.001349414 | 0.07845712 | -0.126305277 | 0.899589 | 0.91245 | -7.33452644 |
| MYLK3   | 0.003622646  | 0.08676165 | 0.12591889   | 0.899895 | 0.91261 | -7.33457516 |
| CALML3  | -0.007909293 | 0.18810092 | -0.125895574 | 0.899913 | 0.91261 | -7.33457809 |
| ADH6    | -0.00122549  | 0.08971546 | -0.125861968 | 0.89994  | 0.91261 | -7.33458232 |
| DLX3    | 0.017405858  | 2.79526243 | 0.125832407  | 0.899963 | 0.91261 | -7.33458604 |
| SHISA8  | 0.003870669  | 0.13087006 | 0.125619497  | 0.900132 | 0.91272 | -7.3346128  |
| ZNF395  | -0.009898742 | 4.81657031 | -0.125329838 | 0.900361 | 0.9129  | -7.33464913 |
| EIF2S3B | 0.006289961  | 0.47962178 | 0.124375743  | 0.901115 | 0.91361 | -7.33476822 |
| KLF7    | -0.010548355 | 2.97553944 | -0.123810551 | 0.901562 | 0.91401 | -7.33483834 |
| MYBBP1  | -0.007085833 | 4.77057357 | -0.123161652 | 0.902076 | 0.91448 | -7.33491845 |
| C1QTNF  | -0.010908566 | 0.62710071 | -0.12275964  | 0.902394 | 0.91474 | -7.33496786 |
| FOXO3   | 0.00938845   | 4.61430373 | 0.122465468  | 0.902626 | 0.91493 | -7.33500392 |
| ZCCHC2  | -0.010432833 | 4.27209061 | -0.122184281 | 0.902849 | 0.9151  | -7.33503831 |
| PENK    | 0.016233529  | 0.40912904 | 0.122042054  | 0.902961 | 0.91516 | -7.33505567 |
| ANKRD1  | 0.008150951  | 5.25976571 | 0.120490271  | 0.904189 | 0.91635 | -7.3352438  |
| TNNI3   | -0.011246202 | 0.39162374 | -0.119904809 | 0.904653 | 0.91676 | -7.33531415 |
| FAM153A | 0.008445211  | 0.51715221 | 0.119708369  | 0.904808 | 0.91686 | -7.33533768 |
| CRB2    | 0.007820635  | 0.36449543 | 0.11861069   | 0.905677 | 0.91769 | -7.33546844 |
| MOCOS   | -0.009361232 | 1.27918413 | -0.118362204 | 0.905873 | 0.91783 | -7.33549788 |
| ATF3    | -0.028317584 | 5.40342956 | -0.118217851 | 0.905988 | 0.91789 | -7.33551495 |
| ARPIN   | 0.00800948   | 4.24609185 | 0.118147751  | 0.906043 | 0.91789 | -7.33552323 |
| CORO7-1 | -0.000896943 | 0.05429753 | -0.117302622 | 0.906712 | 0.91852 | -7.33562269 |
| OSBPL5  | 0.007579968  | 3.55093035 | 0.115703191  | 0.907978 | 0.91975 | -7.33580898 |
| PLCXD3  | -0.008477986 | 0.73281421 | -0.114038141 | 0.909297 | 0.92103 | -7.3360002  |
| CYP4A11 | 0.001600049  | 0.06963108 | 0.113711624  | 0.909555 | 0.92123 | -7.33603737 |
| RAB33B  | 0.007385146  | 2.97450814 | 0.1114846    | 0.911319 | 0.92296 | -7.33628806 |
| DOCK7   | 0.009448949  | 2.85426358 | 0.110519631  | 0.912084 | 0.92368 | -7.33639514 |
| CNGB1   | 0.002414103  | 0.13298522 | 0.110286165  | 0.912269 | 0.92382 | -7.33642091 |
| SPAG6   | -0.006879974 | 0.23340377 | -0.109927658 | 0.912553 | 0.92405 | -7.33646037 |
| CDCA8   | -0.007196106 | 1.92277351 | -0.10955824  | 0.912845 | 0.92429 | -7.3365009  |
| RPEL1   | 0.000884536  | 0.05181114 | 0.109340225  | 0.913018 | 0.92441 | -7.33652476 |
| KCNQ5   | 0.014449429  | 2.21606933 | 0.10855142   | 0.913643 | 0.92494 | -7.33661067 |
| STX19   | -0.005104038 | 0.48541686 | -0.108499211 | 0.913685 | 0.92494 | -7.33661634 |
| PMFBP1  | 0.002705569  | 0.26379961 | 0.108474563  | 0.913704 | 0.92494 | -7.33661901 |
| GSTM5   | 0.007727263  | 0.66141916 | 0.108334     | 0.913816 | 0.92498 | -7.33663424 |
| OVCH2   | 0.001551173  | 0.07407342 | 0.108289291  | 0.913851 | 0.92498 | -7.33663909 |
| TSC22D1 | 0.019093312  | 7.40822323 | 0.107520134  | 0.91446  | 0.92554 | -7.33672206 |
| WDR81   | -0.007541306 | 3.72213245 | -0.107192349 | 0.91472  | 0.92575 | -7.33675724 |

|         |              |            |              |          |         |             |
|---------|--------------|------------|--------------|----------|---------|-------------|
| RPL28   | 0.008211003  | 8.31782566 | 0.107014086  | 0.914862 | 0.92583 | -7.33677633 |
| TPD52L1 | 0.012482917  | 5.58440047 | 0.106418585  | 0.915334 | 0.92626 | -7.33683986 |
| DGKK    | 0.001045813  | 0.0357929  | 0.104982209  | 0.916472 | 0.92732 | -7.33699165 |
| RNPEPL  | -0.005782236 | 4.89766056 | -0.104947677 | 0.916499 | 0.92732 | -7.33699527 |
| HSPH1   | 0.009644266  | 5.17783251 | 0.103568425  | 0.917593 | 0.92838 | -7.33713903 |
| DENND4  | -0.005625077 | 4.03048624 | -0.103358134 | 0.91776  | 0.92849 | -7.33716078 |
| FUOM    | -0.012949944 | 3.63449766 | -0.103034362 | 0.918016 | 0.92869 | -7.33719418 |
| HS3ST6  | -0.007650632 | 0.3994186  | -0.10278661  | 0.918213 | 0.92884 | -7.33721967 |
| CELF6   | 0.000997307  | 0.06147609 | 0.102705681  | 0.918277 | 0.92885 | -7.33722799 |
| CORO6   | 0.023417951  | 4.39612463 | 0.102064791  | 0.918785 | 0.9293  | -7.33729359 |
| RDH16   | 0.00260547   | 0.34703763 | 0.101795357  | 0.918999 | 0.92947 | -7.33732104 |
| TBC1D3C | -0.000905945 | 0.05273174 | -0.101554926 | 0.919189 | 0.9296  | -7.33734548 |
| CCDC16  | -0.000505535 | 0.01075558 | -0.10135455  | 0.919348 | 0.92971 | -7.33736581 |
| RPS6KA  | -0.009568206 | 6.21774702 | -0.101076085 | 0.919569 | 0.92988 | -7.33739398 |
| ZBTB10  | -0.00736228  | 3.59567865 | -0.10092032  | 0.919693 | 0.92995 | -7.33740971 |
| OXGR1   | 0.003080346  | 0.23975898 | 0.099716395  | 0.920647 | 0.93086 | -7.33753046 |
| HES4    | -0.013134465 | 3.8417206  | -0.098644572 | 0.921498 | 0.93166 | -7.33763673 |
| PNPLA2  | -0.007464803 | 6.10929136 | -0.098478442 | 0.921629 | 0.93174 | -7.3376531  |
| PHTF2   | -0.005967461 | 2.73160824 | -0.098190046 | 0.921858 | 0.93191 | -7.33768145 |
| WASHC4  | 0.007340628  | 4.14197651 | 0.098107946  | 0.921923 | 0.93192 | -7.33768951 |
| CDK15   | 0.001464379  | 0.10244352 | 0.097052768  | 0.92276  | 0.93271 | -7.33779245 |
| QSER1   | -0.00779383  | 3.46844467 | -0.095612615 | 0.923903 | 0.93381 | -7.33793115 |
| GPR75   | -0.008275011 | 1.73469248 | -0.095157667 | 0.924264 | 0.93412 | -7.33797453 |
| UGT2B7  | 0.004766749  | 0.17246458 | 0.095089214  | 0.924318 | 0.93412 | -7.33798104 |
| MCM2    | 0.008340491  | 4.23025669 | 0.095013626  | 0.924378 | 0.93413 | -7.33798822 |
| SLC1A3  | -0.010900196 | 1.72974494 | -0.092899657 | 0.926056 | 0.93577 | -7.33818679 |
| USH2A   | -0.000502426 | 0.0229973  | -0.092748224 | 0.926176 | 0.93583 | -7.33820085 |
| ATP10B  | 0.010483944  | 0.67794267 | 0.092029222  | 0.926747 | 0.93635 | -7.33826726 |
| RABGGT  | 0.005069309  | 5.13202373 | 0.091643634  | 0.927053 | 0.93661 | -7.33830266 |
| NFATC2I | -0.005118928 | 3.90871063 | -0.090403108 | 0.928038 | 0.93755 | -7.33841555 |
| FAAH2   | 0.007562954  | 4.45881429 | 0.089953551  | 0.928394 | 0.93785 | -7.33845608 |
| RGL1    | -0.008643732 | 3.40581394 | -0.089404813 | 0.92883  | 0.93823 | -7.33850528 |
| MTAP    | -0.005226985 | 2.8280135  | -0.088466013 | 0.929575 | 0.93888 | -7.33858875 |
| NPIPB15 | 0.013983705  | 2.13632594 | 0.08845717   | 0.929582 | 0.93888 | -7.33858953 |
| SLC4A1C | -0.002078511 | 0.07627228 | -0.088323421 | 0.929689 | 0.93893 | -7.33860135 |
| GGN     | -0.005991346 | 1.73067005 | -0.088012123 | 0.929936 | 0.93913 | -7.33862879 |
| AOC1    | 0.015442604  | 1.50632746 | 0.087625631  | 0.930243 | 0.93934 | -7.33866272 |
| CMPK2   | -0.007042296 | 2.4595289  | -0.087602452 | 0.930261 | 0.93934 | -7.33866475 |
| SHE     | 0.010871255  | 4.52233025 | 0.086983085  | 0.930753 | 0.93978 | -7.3387188  |
| LPL     | -0.015071762 | 4.20945215 | -0.085947703 | 0.931575 | 0.94056 | -7.33880831 |



|          |              |            |              |          |         |             |
|----------|--------------|------------|--------------|----------|---------|-------------|
| GPR179   | -0.000641941 | 0.04807215 | -0.085479851 | 0.931947 | 0.94088 | -7.3388484  |
| GP1BA    | 0.006159474  | 1.12613891 | 0.084114988  | 0.933031 | 0.94186 | -7.33896411 |
| SLC47A10 | 0.009401563  | 4.04450607 | 0.084113416  | 0.933032 | 0.94186 | -7.33896424 |
| EP300    | 0.008641418  | 5.14612671 | 0.084006705  | 0.933117 | 0.94189 | -7.33897321 |
| PCDHGA   | 0.008139572  | 1.12570962 | 0.083028496  | 0.933894 | 0.94262 | -7.33905488 |
| COL6A1   | 0.010702552  | 6.13378674 | 0.082949948  | 0.933956 | 0.94263 | -7.3390614  |
| TMIGD3   | 0.007825385  | 1.58948819 | 0.082648842  | 0.934195 | 0.94281 | -7.33908632 |
| LRP5L    | 0.010062691  | 3.65227471 | 0.082444374  | 0.934358 | 0.94292 | -7.3391032  |
| TSC22D2  | -0.005575078 | 3.1435755  | -0.080556554 | 0.935858 | 0.94438 | -7.33925702 |
| RGMA     | 0.003750429  | 0.69251851 | 0.080267716  | 0.936087 | 0.94455 | -7.33928024 |
| TMTC1    | 0.006456703  | 1.50476116 | 0.080177725  | 0.936158 | 0.94457 | -7.33928746 |
| FOXC2    | 0.006632511  | 1.46774733 | 0.079867949  | 0.936405 | 0.94476 | -7.33931224 |
| MRPS25   | -0.005329665 | 5.32582177 | -0.078732019 | 0.937307 | 0.94561 | -7.3394023  |
| PCDH10   | -0.003799196 | 0.27867798 | -0.077572733 | 0.938228 | 0.94649 | -7.33949288 |
| PCDHA5   | 0.00120104   | 0.08567696 | 0.077110996  | 0.938595 | 0.94675 | -7.33952858 |
| ADSS     | 0.006505603  | 5.89311721 | 0.077110076  | 0.938596 | 0.94675 | -7.33952865 |
| LY6G5B   | 0.005651428  | 1.23314993 | 0.076217655  | 0.939305 | 0.94738 | -7.33959705 |
| WIF1     | -0.007519928 | 0.23935755 | -0.076177819 | 0.939337 | 0.94738 | -7.33960008 |
| ABCB4    | 0.002419777  | 0.49928144 | 0.075414897  | 0.939943 | 0.94794 | -7.3396579  |
| RAPGEF   | -0.00610701  | 2.00304801 | -0.074961953 | 0.940303 | 0.94824 | -7.33969194 |
| DMRT2    | -0.001895426 | 0.15765534 | -0.074272734 | 0.940851 | 0.94874 | -7.33974336 |
| ZNF23    | 0.002923696  | 0.63081467 | 0.073600716  | 0.941386 | 0.94922 | -7.33979303 |
| LIPA     | -0.007419704 | 5.1797822  | -0.073278581 | 0.941642 | 0.94942 | -7.33981669 |
| ZNF695   | -0.001125286 | 0.1700999  | -0.073113839 | 0.941773 | 0.94947 | -7.33982874 |
| UHMK1    | 0.005363414  | 5.00256043 | 0.073074419  | 0.941804 | 0.94947 | -7.33983162 |
| GADD45   | 0.009797451  | 6.25172567 | 0.072961622  | 0.941894 | 0.94951 | -7.33983986 |
| NUDT17   | -0.007516409 | 3.34986517 | -0.072737301 | 0.942072 | 0.94963 | -7.33985619 |
| SHROOM   | -0.007919688 | 3.30998685 | -0.072476534 | 0.942279 | 0.94978 | -7.33987512 |
| SOX9     | 0.008408487  | 5.41194745 | 0.072302685  | 0.942417 | 0.94987 | -7.3398877  |
| CAPN14   | -0.000737765 | 0.07087768 | -0.072102391 | 0.942577 | 0.94997 | -7.33990216 |
| HGF      | -0.004505835 | 0.81414054 | -0.071836898 | 0.942788 | 0.95013 | -7.33992127 |
| LYPD2    | 0.002964819  | 0.17835082 | 0.071284791  | 0.943227 | 0.95045 | -7.33996077 |
| PLXND1   | 0.006727812  | 5.73308821 | 0.071222301  | 0.943276 | 0.95045 | -7.33996522 |
| SLCO4C   | 0.01170275   | 2.04463793 | 0.071216869  | 0.943281 | 0.95045 | -7.3399656  |
| ANKRD2   | 0.004504897  | 0.34687779 | 0.071010349  | 0.943445 | 0.95056 | -7.33998029 |
| FAM110A  | 0.005945656  | 4.17365135 | 0.070799352  | 0.943613 | 0.95068 | -7.33999524 |
| RAB40A   | -0.002820436 | 0.66429294 | -0.070597926 | 0.943773 | 0.95078 | -7.34000948 |
| TMEM89   | -0.001229267 | 0.10196847 | -0.069571568 | 0.944589 | 0.95155 | -7.3400814  |
| FGFRL1   | -0.006192135 | 6.77462806 | -0.06939846  | 0.944727 | 0.95163 | -7.34009342 |
| SLC38A2  | -0.005684465 | 5.55162198 | -0.069172498 | 0.944906 | 0.95175 | -7.34010907 |

|         |              |            |              |          |         |             |
|---------|--------------|------------|--------------|----------|---------|-------------|
| YPEL3   | 0.005694716  | 5.74507209 | 0.068209195  | 0.945672 | 0.95247 | -7.34017523 |
| NEK2    | -0.004811169 | 0.87748883 | -0.068066046 | 0.945786 | 0.95253 | -7.34018498 |
| B3GAT2  | 0.001570774  | 0.33977268 | 0.067370131  | 0.94634  | 0.95303 | -7.34023209 |
| PPP4R4  | 0.002904424  | 0.37279365 | 0.066998566  | 0.946635 | 0.95327 | -7.34025705 |
| MBNL1   | -0.004282079 | 4.91597191 | -0.065622599 | 0.947729 | 0.95431 | -7.34034827 |
| NBPF14  | 0.003341038  | 1.36146509 | 0.064757977  | 0.948417 | 0.95494 | -7.34040462 |
| WNT7B   | -0.006181356 | 1.61378108 | -0.064695678 | 0.948467 | 0.95494 | -7.34040865 |
| NLRP4   | 0.001414807  | 0.05887135 | 0.062198734  | 0.950453 | 0.95688 | -7.34056704 |
| TTN     | 0.002632311  | 0.38662483 | 0.061744067  | 0.950815 | 0.95719 | -7.34059521 |
| HPR     | 0.000982053  | 0.06488277 | 0.061422241  | 0.951071 | 0.95739 | -7.34061502 |
| R3HDM2  | -0.003328488 | 4.6103397  | -0.06127314  | 0.951189 | 0.95746 | -7.34062417 |
| GARS    | 0.004342864  | 6.13134239 | 0.061117396  | 0.951313 | 0.95752 | -7.3406337  |
| EPB41L1 | -0.004476661 | 4.90908892 | -0.059529219 | 0.952577 | 0.95874 | -7.34072948 |
| SLC12A5 | -0.003845886 | 0.58672617 | -0.059219421 | 0.952824 | 0.95893 | -7.34074787 |
| LRRD1   | -0.000549436 | 0.07410379 | -0.058835334 | 0.953129 | 0.95918 | -7.34077054 |
| PCDHB1  | -0.007935021 | 1.57331521 | -0.058432117 | 0.95345  | 0.95945 | -7.34079417 |
| NDC80   | 0.00405982   | 1.38850281 | 0.057413686  | 0.95426  | 0.9602  | -7.34085315 |
| CARM1   | 0.004366194  | 4.1447105  | 0.057234488  | 0.954403 | 0.96027 | -7.34086342 |
| PRG2    | -0.000906425 | 0.091422   | -0.05715781  | 0.954464 | 0.96027 | -7.3408678  |
| EOGT    | 0.003686775  | 3.19865761 | 0.05711601   | 0.954497 | 0.96027 | -7.34087019 |
| TULP3   | 0.004417117  | 4.46530002 | 0.056802884  | 0.954746 | 0.96047 | -7.34088802 |
| PTK7    | 0.006738156  | 5.18695525 | 0.056448292  | 0.955029 | 0.96069 | -7.3409081  |
| OXER1   | -0.004833024 | 1.47989799 | -0.056299842 | 0.955147 | 0.96075 | -7.34091646 |
| UBAP2L  | 0.003687519  | 5.80803621 | 0.056198621  | 0.955227 | 0.96078 | -7.34092216 |
| CTDSPL  | 0.004674489  | 4.00343183 | 0.05596995   | 0.955409 | 0.96089 | -7.34093498 |
| SRGAP1  | -0.003569333 | 2.00728688 | -0.055915999 | 0.955452 | 0.96089 | -7.34093799 |
| SEMA4A  | 0.006191226  | 4.73403414 | 0.055471242  | 0.955806 | 0.96119 | -7.34096276 |
| FAM83B  | -0.006327932 | 1.96416465 | -0.055355305 | 0.955899 | 0.96123 | -7.34096918 |
| TEX12   | -0.000957005 | 0.17009762 | -0.054644338 | 0.956464 | 0.96174 | -7.34100828 |
| CCN3    | 0.005507918  | 3.90826774 | 0.05360455   | 0.957292 | 0.96251 | -7.34106454 |
| MPRIP   | 0.003986774  | 5.21813547 | 0.052087148  | 0.9585   | 0.96367 | -7.34114471 |
| ART3    | -0.000713128 | 0.08012963 | -0.051872056 | 0.958671 | 0.96379 | -7.34115589 |
| ALCAM   | 0.005591486  | 6.065273   | 0.050842101  | 0.959491 | 0.96455 | -7.34120877 |
| SLC35E2 | -0.00334918  | 1.41272921 | -0.049764155 | 0.960349 | 0.96536 | -7.34126298 |
| HLA-E   | 0.003894403  | 9.50070556 | 0.049442678  | 0.960605 | 0.96556 | -7.34127893 |
| WDR62   | -0.001885166 | 0.71727826 | -0.049132878 | 0.960852 | 0.96575 | -7.34129419 |
| ABCA1   | 0.005529287  | 3.71058662 | 0.048772672  | 0.961138 | 0.96598 | -7.34131182 |
| JAK1    | -0.004078641 | 6.30167867 | -0.048222484 | 0.961576 | 0.96631 | -7.3413385  |
| THBS3   | -0.003616122 | 3.88258188 | -0.048221731 | 0.961577 | 0.96631 | -7.34133853 |
| SGCG    | 0.002877848  | 0.25770895 | 0.047777658  | 0.961931 | 0.9666  | -7.34135984 |

|          |              |            |              |          |         |             |
|----------|--------------|------------|--------------|----------|---------|-------------|
| USP27X   | 0.003763401  | 3.15836734 | 0.0469769    | 0.962568 | 0.96719 | -7.34139777 |
| PCDHGA   | 0.005464898  | 1.50359437 | 0.046610039  | 0.96286  | 0.96742 | -7.34141494 |
| EMILIN3  | 0.005355956  | 1.0532005  | 0.045924042  | 0.963407 | 0.96791 | -7.34144667 |
| GAS7     | -0.00704951  | 2.24847421 | -0.045408566 | 0.963817 | 0.96827 | -7.3414702  |
| KHSRP    | -0.002786548 | 6.48967038 | -0.044990295 | 0.96415  | 0.96855 | -7.3414891  |
| KIR3DL1  | -0.000784225 | 0.08964317 | -0.044300462 | 0.964699 | 0.96904 | -7.34151989 |
| KCNJ9    | -0.000389081 | 0.05723236 | -0.044155832 | 0.964815 | 0.9691  | -7.34152629 |
| MANEAL   | 0.00425804   | 3.92419708 | 0.043555534  | 0.965293 | 0.96952 | -7.34155261 |
| SLC6A8   | -0.004162989 | 2.66286243 | -0.043025112 | 0.965715 | 0.96989 | -7.34157557 |
| FAM83G   | 0.003743943  | 3.79523283 | 0.042684741  | 0.965986 | 0.9701  | -7.34159015 |
| 4-Mar    | -0.002581287 | 0.47905159 | -0.042519648 | 0.966118 | 0.97018 | -7.34159718 |
| GTSF1    | -0.002873442 | 0.33831836 | -0.040841806 | 0.967454 | 0.97146 | -7.3416671  |
| CADM4    | -0.003754425 | 4.15008394 | -0.039528036 | 0.9685   | 0.97246 | -7.34171988 |
| NFATC2   | 0.003120908  | 3.1237213  | 0.039090833  | 0.968848 | 0.97275 | -7.34173706 |
| CARNS1   | -0.005338095 | 4.68528155 | -0.038756276 | 0.969115 | 0.97296 | -7.34175008 |
| TOX2     | 0.003740452  | 2.65120669 | 0.037819375  | 0.969861 | 0.97365 | -7.34178595 |
| IL6ST    | -0.003320324 | 6.50977129 | -0.03691639  | 0.97058  | 0.97431 | -7.34181968 |
| HMMR     | -0.002349714 | 1.11818586 | -0.034969069 | 0.972132 | 0.97581 | -7.34188966 |
| NANOG    | 0.000192546  | 0.01930968 | 0.03476527   | 0.972294 | 0.97592 | -7.34189676 |
| PCDHA3   | 0.002133473  | 0.47780707 | 0.034682807  | 0.97236  | 0.97593 | -7.34189962 |
| GPC2     | -0.001408137 | 0.36789063 | -0.034527053 | 0.972484 | 0.97595 | -7.34190501 |
| DYRK2    | -0.002442043 | 3.38541547 | -0.03451484  | 0.972493 | 0.97595 | -7.34190543 |
| C11orf24 | -0.001893246 | 4.41650328 | -0.034284288 | 0.972677 | 0.97607 | -7.34191336 |
| XKR7     | 0.000778355  | 0.09641335 | 0.033777146  | 0.973081 | 0.97642 | -7.34193062 |
| TMSB4Y   | -0.005066682 | 0.74321691 | -0.03325719  | 0.973495 | 0.97678 | -7.34194804 |
| LYPD6B   | -0.000902583 | 0.08538944 | -0.031983684 | 0.97451  | 0.97774 | -7.34198957 |
| PROSER   | 0.002294854  | 2.40551346 | 0.031607917  | 0.974809 | 0.97798 | -7.34200152 |
| FXDY1    | -0.001772344 | 0.57299406 | -0.031319333 | 0.975039 | 0.97815 | -7.3420106  |
| WDR49    | 0.000340513  | 0.05010334 | 0.030699136  | 0.975533 | 0.97859 | -7.34202983 |
| HOXD8    | -0.002534779 | 1.66350276 | -0.030587928 | 0.975622 | 0.97862 | -7.34203323 |
| ACSM2B   | 0.000231166  | 0.02162989 | 0.030338745  | 0.975821 | 0.97876 | -7.34204082 |
| SLC44A5  | 0.003735461  | 0.78287464 | 0.030129815  | 0.975987 | 0.97887 | -7.34204714 |
| HHIP     | -0.000737016 | 0.09150872 | -0.029813067 | 0.976239 | 0.97907 | -7.34205663 |
| MAL2     | -0.002772582 | 7.61631803 | -0.029480401 | 0.976504 | 0.97928 | -7.34206649 |
| NAT8     | 0.00133134   | 0.25846414 | 0.029233763  | 0.976701 | 0.97941 | -7.34207373 |
| GON4L    | -0.002120893 | 3.35640367 | -0.028827246 | 0.977025 | 0.97968 | -7.34208553 |
| GGT5     | 0.003643741  | 5.21528887 | 0.02865111   | 0.977165 | 0.97976 | -7.34209059 |
| TBC1D31  | -0.000383535 | 0.09981902 | -0.027508441 | 0.978076 | 0.98062 | -7.34212267 |
| NCOA1    | -0.00223099  | 3.78145201 | -0.02728044  | 0.978257 | 0.98074 | -7.34212891 |
| CLIP4    | -0.002650582 | 5.1488814  | -0.026718557 | 0.978705 | 0.98113 | -7.34214408 |

|          |              |            |              |          |         |             |
|----------|--------------|------------|--------------|----------|---------|-------------|
| TCN2     | 0.002624365  | 6.10023982 | 0.025916354  | 0.979344 | 0.98172 | -7.34216518 |
| SCAI     | -0.001556506 | 2.0928529  | -0.024689202 | 0.980322 | 0.98258 | -7.34219623 |
| UBN1     | -0.001885771 | 4.22823284 | -0.024582916 | 0.980407 | 0.98258 | -7.34219885 |
| C19orf84 | 0.00139175   | 0.35422733 | 0.02458109   | 0.980408 | 0.98258 | -7.34219889 |
| FOXN2    | 0.001866892  | 2.99056699 | 0.024551151  | 0.980432 | 0.98258 | -7.34219963 |
| CRYBA1   | 0.000381205  | 0.11918464 | 0.022424721  | 0.982127 | 0.98422 | -7.34224956 |
| RAPSN    | -0.000909197 | 0.34194794 | -0.022041241 | 0.982432 | 0.98446 | -7.34225808 |
| EME1     | -0.000883035 | 0.7241638  | -0.021669368 | 0.982729 | 0.9847  | -7.34226621 |
| GPR88    | -0.000682549 | 0.1919734  | -0.021351317 | 0.982982 | 0.9849  | -7.34227305 |
| COL2A1   | 0.000303168  | 0.07496207 | 0.020864237  | 0.98337  | 0.98523 | -7.34228333 |
| KIAA184  | -0.000940815 | 1.80588452 | -0.019668295 | 0.984323 | 0.98611 | -7.34230756 |
| PRKD3    | -0.001624757 | 3.53193425 | -0.019614047 | 0.984367 | 0.98611 | -7.34230863 |
| TIA1     | -0.00203233  | 5.12280328 | -0.019424564 | 0.984518 | 0.9862  | -7.34231232 |
| NPIP13   | 0.000713129  | 0.15224439 | 0.019268686  | 0.984642 | 0.98627 | -7.34231534 |
| KCNK1    | -0.0016144   | 4.31675016 | -0.018356028 | 0.985369 | 0.98694 | -7.3423325  |
| ADM5     | -0.001062685 | 0.90641994 | -0.017834731 | 0.985785 | 0.9873  | -7.34234194 |
| SPINK6   | 0.000692822  | 0.28340782 | 0.017647448  | 0.985934 | 0.98739 | -7.34234526 |
| AJUBA    | 0.002055694  | 4.26875384 | 0.017167581  | 0.986316 | 0.98771 | -7.34235361 |
| TCERG1   | 0.004008491  | 5.05767119 | 0.016865578  | 0.986557 | 0.9879  | -7.34235875 |
| SLC5A2   | -0.001015024 | 0.8192702  | -0.016697226 | 0.986691 | 0.98797 | -7.34236157 |
| BIRC5    | -0.001534888 | 1.44445208 | -0.016509422 | 0.986841 | 0.98806 | -7.34236469 |
| SP1      | 0.000948628  | 5.12059002 | 0.014493902  | 0.988447 | 0.98961 | -7.34239593 |
| MYO18B   | -0.000480984 | 0.05741888 | -0.014069786 | 0.988785 | 0.98989 | -7.34240198 |
| NR2C2AI  | 0.000904814  | 4.82725957 | 0.013824702  | 0.988981 | 0.99003 | -7.3424054  |
| ZNF836   | -0.000650603 | 2.52112123 | -0.012901476 | 0.989716 | 0.99071 | -7.34241773 |
| STK39    | -0.001024463 | 3.88923672 | -0.012469664 | 0.990061 | 0.991   | -7.34242321 |
| ARID3A   | -0.000788763 | 2.08750727 | -0.011870189 | 0.990538 | 0.99142 | -7.3424305  |
| FRRS1L   | -0.000599624 | 0.3299358  | -0.011492339 | 0.99084  | 0.99166 | -7.34243492 |
| CDHR5    | 0.000174464  | 0.13511477 | 0.010319536  | 0.991774 | 0.99254 | -7.3424477  |
| KRT18    | -0.000810249 | 8.96127855 | -0.009574762 | 0.992368 | 0.99302 | -7.34245511 |
| OOEP     | 0.000745052  | 0.40359684 | 0.009570237  | 0.992372 | 0.99302 | -7.34245515 |
| SIGLEC8  | 0.000831634  | 0.7906148  | 0.009292607  | 0.992593 | 0.99317 | -7.34245777 |
| ITGB3    | 0.00150426   | 4.70189716 | 0.009225852  | 0.992646 | 0.99317 | -7.34245839 |
| CD8A     | -0.00129282  | 2.75603391 | -0.00846088  | 0.993256 | 0.99371 | -7.34246515 |
| JAK2     | 0.000615046  | 2.5898583  | 0.008400896  | 0.993304 | 0.99371 | -7.34246566 |
| FAM114   | 0.000576704  | 4.75767219 | 0.006914053  | 0.994489 | 0.99484 | -7.34247704 |
| TAS2R4   | -0.00033683  | 0.76188028 | -0.006666909 | 0.994686 | 0.99498 | -7.34247872 |
| PPP1R2   | -0.000227473 | 0.13002948 | -0.00522952  | 0.995832 | 0.99607 | -7.34248727 |
| PLEKHM   | 0.000203116  | 6.10737838 | 0.003612111  | 0.997121 | 0.9973  | -7.34249442 |
| UNC45B   | 7.07E-05     | 0.10002459 | 0.002980583  | 0.997624 | 0.99774 | -7.3424965  |

|         |              |            |              |          |         |             |
|---------|--------------|------------|--------------|----------|---------|-------------|
| SERPINE | -0.000292185 | 3.56891386 | -0.001770678 | 0.998589 | 0.99865 | -7.34249937 |
| IKZF2   | 3.40E-05     | 3.72471777 | 0.000275177  | 0.999781 | 0.99978 | -7.3425009  |
