# Supplementary material for: Clinical Relevance and Tumor Growth Suppression of Mitochondrial ROS Regulators along NADH:Ubiquinone Oxidoreductase Subunit B3 in Thyroid Cancer
Source: Hindawi journal article supplement (doi:10.1155/2022/8038857), 2022-01-01
Supplement: f2 [file 8038857.f2.zip]

|              | Age | Sex    | Race  | T  | N  | M  | Stage | Grade | newTumor   | Smoking | Radiation | Neoadjuvant | Therapy | OS | OS.time | DSS | DSS.time | DFI | DFI.time | PFI | PFI.time | Groups | Expression            |
|--------------|-----|--------|-------|----|----|----|-------|-------|------------|---------|-----------|-------------|---------|----|---------|-----|----------|-----|----------|-----|----------|--------|-----------------------|
| TCGA-DE-A4MD | 71  | MALE   | WHITE | T3 | N1 | M0 | IV    | NA    | Recurrence | NA      | YES       | No          | NA      | 0  | 764     | 0   | 764      | NA  | NA       | 1   | 267      | C1     | NDUFB3 <sup>Low</sup> |
| TCGA-EM-A2CS | 51  | FEMALE | NA    | T3 | N1 | NA | IV    | NA    | NA         | NA      | NA        | No          | NA      | 0  | 841     | 0   | 841      | NA  | NA       | 0   | 841      | C1     | NDUFB3 <sup>Low</sup> |
| TCGA-EM-A2P1 | 33  | MALE   | NA    | T2 | N1 | NA | I     | NA    | Recurrence | NA      | NA        | No          | NA      | 0  | 531     | 0   | 531      | 1   | 363      | 1   | 363      | C1     | NDUFB3 <sup>Low</sup> |
| TCGA-EM-A3FQ | 19  | FEMALE | NA    | T3 | N1 | NA | I     | NA    | NA         | NA      | NA        | No          | NA      | 0  | 492     | 0   | 492      | 0   | 492      | 0   | 492      | C1     | NDUFB3 <sup>Low</sup> |
| TCGA-EM-A3SU | 43  | FEMALE | NA    | T2 | N1 | NA | I     | NA    | NA         | NA      | YES       | No          | NA      | 0  | 911     | 0   | 911      | 0   | 911      | 0   | 911      | C1     | NDUFB3 <sup>Low</sup> |
| TCGA-J8-A3O2 | 39  | MALE   | WHITE | T3 | N1 | M0 | I     | NA    | NA         | NA      | NA        | No          | NA      | 0  | 342     | 0   | 342      | NA  | NA       | 0   | 342      | C1     | NDUFB3 <sup>Low</sup> |
| TCGA-J8-A4HW | 59  | FEMALE | WHITE | T2 | N1 | M0 | III   | NA    | NA         | NA      | YES       | No          | NA      | 0  | 79      | 0   | 79       | 0   | 79       | 0   | 79       | C1     | NDUFB3 <sup>Low</sup> |
| TCGA-4C-A93U | 74  | FEMALE | BLACK | T4 | N1 | M0 | IV    | NA    | NA         | NA      | NO        | No          | NA      | 0  | 129     | 0   | 129      | NA  | NA       | 0   | 129      | C1     | NDUFB3 <sup>Low</sup> |
| TCGA-BJ-A0Z2 | 57  | MALE   | BLACK | T2 | N0 | M1 | IV    | NA    | Metastasis | NA      | NA        | No          | NA      | 0  | 1514    | 0   | 1514     | NA  | NA       | 1   | 158      | C1     | NDUFB3 <sup>Low</sup> |
| TCGA-BJ-A0Z5 | 58  | MALE   | WHITE | T3 | N1 | M0 | III   | NA    | NA         | NA      | NA        | No          | NA      | 0  | 448     | 0   | 448      | NA  | NA       | 0   | 448      | C1     | NDUFB3 <sup>Low</sup> |
| TCGA-BJ-A0Z9 | 57  | FEMALE | WHITE | T3 | N0 | NA | III   | NA    | NA         | NA      | NA        | No          | NA      | 0  | 1257    | 0   | 1257     | NA  | NA       | 0   | 1257     | C1     | NDUFB3 <sup>Low</sup> |
| TCGA-BJ-A0ZB | 66  | MALE   | WHITE | T3 | N1 | M0 | IV    | NA    | NA         | NA      | NA        | No          | NA      | 0  | 122     | 0   | 122      | NA  | NA       | 0   | 122      | C1     | NDUFB3 <sup>Low</sup> |
| TCGA-BJ-A0ZE | 63  | FEMALE | WHITE | T3 | N0 | M0 | III   | NA    | NA         | NA      | NA        | No          | NA      | 0  | 509     | 0   | 509      | NA  | NA       | 0   | 509      | C1     | NDUFB3 <sup>Low</sup> |
| TCGA-BJ-A0ZH | 52  | FEMALE | WHITE | T2 | N1 | NA | IV    | NA    | NA         | NA      | NA        | No          | NA      | 0  | 460     | 0   | 460      | NA  | NA       | 0   | 460      | C1     | NDUFB3 <sup>Low</sup> |
| TCGA-BJ-A0ZJ | 36  | MALE   | WHITE | T2 | N1 | M0 | I     | NA    | NA         | NA      | NA        | No          | NA      | 0  | 1280    | 0   | 1280     | 0   | 1280     | 0   | 1280     | C1     | NDUFB3 <sup>Low</sup> |
| TCGA-BJ-A18Z | 58  | MALE   | WHITE | T3 | N1 | NA | IV    | NA    | NA         | NA      | NA        | No          | NA      | 0  | 1263    | 0   | 1263     | NA  | NA       | 0   | 1263     | C1     | NDUFB3 <sup>Low</sup> |
| TCGA-BJ-A190 | 55  | MALE   | WHITE | T2 | N0 | NA | II    | NA    | NA         | NA      | NA        | No          | NA      | 0  | 626     | 0   | 626      | 0   | 626      | 0   | 626      | C1     | NDUFB3 <sup>Low</sup> |
| TCGA-BJ-A191 | 49  | FEMALE | WHITE | T1 | N0 | M0 | I     | NA    | NA         | NA      | NA        | No          | NA      | 0  | 147     | 0   | 147      | 0   | 147      | 0   | 147      | C1     | NDUFB3 <sup>Low</sup> |
| TCGA-BJ-A28R | 38  | FEMALE | WHITE | T1 | N0 | M0 | I     | NA    | NA         | NA      | NA        | No          | NA      | 0  | 1282    | 0   | 1282     | NA  | NA       | 0   | 1282     | C1     | NDUFB3 <sup>Low</sup> |
| TCGA-BJ-A28S | 79  | MALE   | WHITE | T2 | N0 | M0 | II    | NA    | NA         | NA      | NA        | No          | NA      | 0  | 640     | 0   | 640      | NA  | NA       | 0   | 640      | C1     | NDUFB3 <sup>Low</sup> |
| TCGA-BJ-A28X | 32  | FEMALE | WHITE | T3 | N1 | M0 | I     | NA    | NA         | NA      | YES       | No          | NA      | 0  | 942     | 0   | 942      | 1   | 494      | 1   | 494      | C1     | NDUFB3 <sup>Low</sup> |
| TCGA-BJ-A28Z | 46  | FEMALE | WHITE | T3 | N1 | M0 | III   | NA    | NA         | NA      | NA        | No          | NA      | 0  | 337     | 0   | 337      | NA  | NA       | 0   | 337      | C1     | NDUFB3 <sup>Low</sup> |
| TCGA-BJ-A2NA | 77  | MALE   | WHITE | T3 | N0 | M0 | III   | NA    | Metastasis | NA      | NA        | No          | NA      | 0  | 577     | 0   | 577      | NA  | NA       | 1   | 127      | C1     | NDUFB3 <sup>Low</sup> |
| TCGA-BJ-A3EZ | 51  | MALE   | WHITE | T3 | N1 | M0 | IV    | NA    | NA         | NA      | NA        | No          | NA      | 0  | 487     | 0   | 487      | NA  | NA       | 0   | 487      | C1     | NDUFB3 <sup>Low</sup> |
| TCGA-BJ-A45C | 78  | MALE   | BLACK | T3 | N0 | M0 | III   | NA    | NA         | NA      | YES       | No          | NA      | 1  | 243     | 1   | 243      | NA  | NA       | 1   | 243      | C1     | NDUFB3 <sup>Low</sup> |
| TCGA-BJ-A45E | 46  | FEMALE | WHITE | T1 | N0 | M0 | I     | NA    | NA         | NA      | NO        | No          | NA      | 0  | 639     | 0   | 639      | NA  | NA       | 0   | 639      | C1     | NDUFB3 <sup>Low</sup> |
| TCGA-BJ-A45F | 59  | FEMALE | WHITE | T1 | N0 | M0 | I     | NA    | NA         | NA      | YES       | No          | NA      | 0  | 105     | 0   | 105      | NA  | NA       | 0   | 105      | C1     | NDUFB3 <sup>Low</sup> |
| TCGA-BJ-A45I | 51  | FEMALE | WHITE | T3 | N0 | M0 | III   | NA    | NA         | NA      | YES       | No          | NA      | 0  | 470     | 0   | 470      | NA  | NA       | 1   | 110      | C1     | NDUFB3 <sup>Low</sup> |
| TCGA-BJ-A4O8 | 47  | MALE   | WHITE | T3 | N1 | M0 | III   | NA    | NA         | NA      | YES       | No          | NA      | 0  | 591     | 0   | 591      | 0   | 591      | 0   | 591      | C1     | NDUFB3 <sup>Low</sup> |
| TCGA-BJ-A4O9 | 51  | FEMALE | WHITE | T2 | N0 | M0 | II    | NA    | NA         | NA      | NO        | No          | NA      | 0  | 714     | 0   | 714      | NA  | NA       | 0   | 714      | C1     | NDUFB3 <sup>Low</sup> |
| TCGA-CE-A483 | 34  | FEMALE | ASIAN | T2 | N1 | M0 | I     | NA    | NA         | NA      | NO        | No          | NA      | 0  | 457     | 0   | 457      | 0   | 457      | 0   | 457      | C1     | NDUFB3 <sup>Low</sup> |
| TCGA-CE-A485 | 32  | MALE   | ASIAN | T2 | N1 | M0 | I     | NA    | NA         | NA      | NO        | No          | NA      | 0  | 385     | 0   | 385      | 0   | 385      | 0   | 385      | C1     | NDUFB3 <sup>Low</sup> |
| TCGA-DE-A0XZ | 65  | FEMALE | WHITE | T1 | N1 | M0 | III   | NA    | NA         | NA      | NA        | No          | NA      | 0  | 1090    | 0   | 1090     | 1   | 204      | 1   | 204      | C1     | NDUFB3 <sup>Low</sup> |
| TCGA-DE-A0Y2 | 30  | FEMALE | WHITE | T2 | N1 | M0 | I     | NA    | NA         | NA      | NA        | No          | NA      | 0  | 658     | 0   | 658      | 0   | 658      | 0   | 658      | C1     | NDUFB3 <sup>Low</sup> |
| TCGA-DE-A0Y3 | 60  | FEMALE | ASIAN | T4 | N1 | M1 | IV    | NA    | Metastasis | NA      | NA        | No          | NA      | 0  | 1526    | 0   | 1526     | NA  | NA       | 1   | 30       | C1     | NDUFB3 <sup>Low</sup> |
| TCGA-DE-A4M8 | 61  | FEMALE | WHITE | T2 | N1 | M0 | III   | NA    | NA         | NA      | YES       | No          | NA      | 0  | 564     | 0   | 564      | 0   | 564      | 0   | 564      | C1     | NDUFB3 <sup>Low</sup> |
| TCGA-DE-A4MA | 52  | FEMALE | BLACK | T3 | N1 | M0 | III   | NA    | NA         | NA      | YES       | No          | NA      | 0  | 916     | 0   | 916      | 0   | 916      | 0   | 916      | C1     | NDUFB3 <sup>Low</sup> |
| TCGA-DE-A4MB | 79  | FEMALE | WHITE | T3 | N1 | M0 | IV    | NA    | NA         | NA      | YES       | No          | NA      | 0  | 352     | 0   | 352      | NA  | NA       | 0   | 352      | C1     | NDUFB3 <sup>Low</sup> |

|                |    |        |                 |    |    |    |     |    |            |    |     |     |    |   |      |   |      |    |      |   |      |    |                       |
|----------------|----|--------|-----------------|----|----|----|-----|----|------------|----|-----|-----|----|---|------|---|------|----|------|---|------|----|-----------------------|
| TCGA-DE-A4MC   | 43 | FEMALE | AMERICAN INDIAN | T3 | N1 | M0 | I   | NA | Recurrence | NA | YES | No  | NA | 0 | 913  | 0 | 913  | 1  | 332  | 1 | 332  | C1 | NDUFB3 <sup>Low</sup> |
| TCGA-DE-A4MD.1 | 71 | MALE   | WHITE           | T3 | N1 | M0 | IV  | NA | Recurrence | NA | YES | No  | NA | 0 | 764  | 0 | 764  | NA | NA   | 1 | 267  | C1 | NDUFB3 <sup>Low</sup> |
| TCGA-DE-A7U5   | 36 | FEMALE | BLACK           | T2 | N0 | M0 | I   | NA | NA         | NA | NO  | No  | NA | 0 | 84   | 0 | 84   | NA | NA   | 0 | 84   | C1 |                       |
| TCGA-DJ-A13O   | 56 | MALE   | WHITE           | T1 | N0 | M0 | I   | NA | NA         | NA | NA  | No  | NA | 0 | 1161 | 0 | 1161 | 0  | 1161 | 0 | 1161 | C1 | NDUFB3 <sup>Low</sup> |
| TCGA-DJ-A13R   | 50 | MALE   | WHITE           | T3 | N0 | M0 | III | NA | NA         | NA | NA  | No  | NA | 0 | 565  | 0 | 565  | 0  | 565  | 0 | 565  | C1 | NDUFB3 <sup>Low</sup> |
| TCGA-DJ-A13S   | 19 | FEMALE | WHITE           | T1 | N0 | M0 | I   | NA | NA         | NA | NA  | No  | NA | 0 | 265  | 0 | 265  | 0  | 265  | 0 | 265  | C1 | NDUFB3 <sup>Low</sup> |
| TCGA-DJ-A13T   | 37 | FEMALE | WHITE           | T2 | N0 | M0 | I   | NA | NA         | NA | NA  | No  | NA | 0 | 1709 | 0 | 1709 | 0  | 1709 | 0 | 1709 | C1 | NDUFB3 <sup>Low</sup> |
| TCGA-DJ-A13U   | 60 | MALE   | WHITE           | T3 | N0 | M0 | III | NA | NA         | NA | NA  | No  | NA | 0 | 1590 | 0 | 1590 | 0  | 1590 | 0 | 1590 | C1 | NDUFB3 <sup>Low</sup> |
| TCGA-DJ-A13V   | 21 | FEMALE | NA              | T3 | N1 | M0 | I   | NA | NA         | NA | NA  | No  | NA | 0 | 1313 | 0 | 1313 | 0  | 1313 | 0 | 1313 | C1 | NDUFB3 <sup>Low</sup> |
| TCGA-DJ-A13W   | 45 | FEMALE | WHITE           | T1 | N0 | M0 | I   | NA | NA         | NA | NA  | No  | NA | 0 | 1593 | 0 | 1593 | 0  | 1593 | 0 | 1593 | C1 | NDUFB3 <sup>Low</sup> |
| TCGA-DJ-A13X   | 51 | FEMALE | NA              | T3 | N0 | M0 | III | NA | NA         | NA | NA  | No  | NA | 0 | 253  | 0 | 253  | 0  | 253  | 0 | 253  | C1 | NDUFB3 <sup>Low</sup> |
| TCGA-DJ-A1QD   | 20 | FEMALE | WHITE           | T2 | N1 | M0 | I   | NA | NA         | NA | NA  | No  | NA | 0 | 1462 | 0 | 1462 | 0  | 1462 | 0 | 1462 | C1 | NDUFB3 <sup>Low</sup> |
| TCGA-DJ-A1QE   | 62 | FEMALE | WHITE           | T3 | N0 | M0 | III | NA | NA         | NA | NA  | No  | NA | 0 | 4134 | 0 | 4134 | 0  | 4134 | 0 | 4134 | C1 | NDUFB3 <sup>Low</sup> |
| TCGA-DJ-A1QF   | 61 | FEMALE | WHITE           | T2 | N0 | M0 | II  | NA | NA         | NA | NA  | No  | NA | 0 | 931  | 0 | 931  | 0  | 931  | 0 | 931  | C1 | NDUFB3 <sup>Low</sup> |
| TCGA-DJ-A1QG   | 62 | MALE   | WHITE           | T1 | N0 | M0 | I   | NA | NA         | NA | NA  | No  | NA | 0 | 1368 | 0 | 1368 | 0  | 1368 | 0 | 1368 | C1 | NDUFB3 <sup>Low</sup> |
| TCGA-DJ-A1QO   | 69 | MALE   | WHITE           | T3 | N0 | M0 | III | NA | Primary    | NA | NA  | No  | NA | 0 | 1442 | 0 | 1442 | 0  | 1442 | 1 | 1062 | C1 | NDUFB3 <sup>Low</sup> |
| TCGA-DJ-A1QQ   | 43 | MALE   | ASIAN           | T3 | N0 | M0 | I   | NA | NA         | NA | NA  | No  | NA | 0 | 534  | 0 | 534  | 0  | 534  | 0 | 534  | C1 | NDUFB3 <sup>Low</sup> |
| TCGA-DJ-A2PN   | 70 | FEMALE | WHITE           | T1 | N0 | M0 | I   | NA | NA         | NA | NA  | No  | NA | 0 | 307  | 0 | 307  | 0  | 307  | 0 | 307  | C1 | NDUFB3 <sup>Low</sup> |
| TCGA-DJ-A2PO   | 54 | MALE   | WHITE           | T1 | N0 | M0 | I   | NA | NA         | NA | NA  | No  | NA | 0 | 243  | 0 | 243  | 0  | 243  | 0 | 243  | C1 | NDUFB3 <sup>Low</sup> |
| TCGA-DJ-A2PR   | 27 | MALE   | ASIAN           | T3 | N1 | M0 | I   | NA | NA         | NA | NA  | No  | NA | 0 | 835  | 0 | 835  | 0  | 835  | 0 | 835  | C1 | NDUFB3 <sup>Low</sup> |
| TCGA-DJ-A2PU   | 52 | FEMALE | WHITE           | T2 | N0 | M0 | II  | NA | NA         | NA | NA  | No  | NA | 0 | 1033 | 0 | 1033 | 0  | 1033 | 0 | 1033 | C1 | NDUFB3 <sup>Low</sup> |
| TCGA-DJ-A2PV   | 53 | FEMALE | WHITE           | T2 | N0 | M0 | II  | NA | NA         | NA | NA  | No  | NA | 0 | 973  | 0 | 973  | 0  | 973  | 0 | 973  | C1 | NDUFB3 <sup>Low</sup> |
| TCGA-DJ-A2PW   | 65 | MALE   | WHITE           | T3 | N1 | M0 | III | NA | NA         | NA | NA  | No  | NA | 0 | 1060 | 0 | 1060 | 0  | 1060 | 0 | 1060 | C1 | NDUFB3 <sup>Low</sup> |
| TCGA-DJ-A2PY   | 46 | FEMALE | WHITE           | T3 | N1 | M0 | III | NA | NA         | NA | NA  | No  | NA | 0 | 267  | 0 | 267  | 0  | 267  | 0 | 267  | C1 | NDUFB3 <sup>Low</sup> |
| TCGA-DJ-A2PZ   | 63 | MALE   | WHITE           | T3 | N0 | M0 | III | NA | NA         | NA | NA  | No  | NA | 0 | 256  | 0 | 256  | 0  | 256  | 0 | 256  | C1 | NDUFB3 <sup>Low</sup> |
| TCGA-DJ-A2Q1   | 44 | FEMALE | WHITE           | T1 | N1 | M0 | I   | NA | NA         | NA | NA  | No  | NA | 0 | 1148 | 0 | 1148 | 0  | 1148 | 0 | 1148 | C1 | NDUFB3 <sup>Low</sup> |
| TCGA-DJ-A2Q3   | 61 | FEMALE | ASIAN           | T3 | N1 | M0 | III | NA | Primary    | NA | NA  | No  | NA | 0 | 1224 | 0 | 1224 | 0  | 1224 | 1 | 385  | C1 | NDUFB3 <sup>Low</sup> |
| TCGA-DJ-A2Q4   | 53 | MALE   | WHITE           | T1 | N1 | M0 | III | NA | NA         | NA | NA  | No  | NA | 0 | 1032 | 0 | 1032 | 0  | 1032 | 0 | 1032 | C1 | NDUFB3 <sup>Low</sup> |
| TCGA-DJ-A2Q5   | 51 | MALE   | WHITE           | T2 | N1 | M0 | IV  | NA | NA         | NA | NA  | No  | NA | 0 | 1140 | 0 | 1140 | NA | NA   | 0 | 1140 | C1 | NDUFB3 <sup>Low</sup> |
| TCGA-DJ-A2Q6   | 38 | FEMALE | WHITE           | T1 | N1 | M0 | I   | NA | NA         | NA | NA  | No  | NA | 0 | 1109 | 0 | 1109 | 0  | 1109 | 0 | 1109 | C1 | NDUFB3 <sup>Low</sup> |
| TCGA-DJ-A3UM   | 45 | FEMALE | ASIAN           | T1 | N0 | M0 | I   | NA | NA         | NA | NO  | No  | NA | 0 | 944  | 0 | 944  | 0  | 944  | 0 | 944  | C1 | NDUFB3 <sup>Low</sup> |
| TCGA-DJ-A3UO   | 63 | MALE   | WHITE           | T3 | N1 | M0 | IV  | NA | Primary    | NA | YES | No  | NA | 0 | 957  | 0 | 957  | NA | NA   | 1 | 641  | C1 | NDUFB3 <sup>Low</sup> |
| TCGA-DJ-A3UQ   | 45 | FEMALE | ASIAN           | T3 | N1 | M0 | III | NA | NA         | NA | YES | No  | NA | 0 | 595  | 0 | 595  | 0  | 595  | 0 | 595  | C1 | NDUFB3 <sup>Low</sup> |
| TCGA-DJ-A3UU   | 49 | FEMALE | WHITE           | T3 | N0 | M0 | III | NA | NA         | NA | YES | No  | NA | 0 | 713  | 0 | 713  | NA | NA   | 0 | 713  | C1 | NDUFB3 <sup>Low</sup> |
| TCGA-DJ-A3UW   | 50 | FEMALE | WHITE           | T1 | N0 | M0 | I   | NA | NA         | NA | NO  | No  | NA | 0 | 1812 | 0 | 1812 | 0  | 1812 | 0 | 1812 | C1 | NDUFB3 <sup>Low</sup> |
| TCGA-DJ-A3UY   | 32 | FEMALE | WHITE           | T1 | N0 | M0 | I   | NA | NA         | NA | NO  | No  | NA | 0 | 1091 | 0 | 1091 | 0  | 1091 | 0 | 1091 | C1 | NDUFB3 <sup>Low</sup> |
| TCGA-DJ-A3V0   | 56 | MALE   | NA              | T4 | N1 | M0 | IV  | NA | NA         | NA | YES | No  | NA | 0 | 1125 | 0 | 1125 | NA | NA   | 0 | 1125 | C1 | NDUFB3 <sup>Low</sup> |
| TCGA-DJ-A3V5   | 76 | FEMALE | WHITE           | T3 | N0 | M0 | III | NA | NA         | NA | YES | No  | NA | 0 | 584  | 0 | 584  | NA | NA   | 0 | 584  | C1 | NDUFB3 <sup>Low</sup> |
| TCGA-DJ-A3V6   | 54 | MALE   | WHITE           | T3 | N0 | M0 | III | NA | NA         | NA | YES | Yes | NA | 0 | 818  | 0 | 818  | 0  | 818  | 0 | 818  | C1 | NDUFB3 <sup>Low</sup> |
| TCGA-DJ-A3VB   | 52 | MALE   | NA              | T3 | N1 | M0 | III | NA | NA         | NA | YES | No  | NA | 0 | 697  | 0 | 697  | 0  | 697  | 0 | 697  | C1 | NDUFB3 <sup>Low</sup> |

|              |    |        |       |    |    |    |     |    |            |    |     |     |                 |   |      |    |      |    |      |   |      |    |                       |
|--------------|----|--------|-------|----|----|----|-----|----|------------|----|-----|-----|-----------------|---|------|----|------|----|------|---|------|----|-----------------------|
| TCGA-DJ-A3VD | 32 | FEMALE | WHITE | T1 | N1 | M0 | I   | NA | NA         | NA | YES | No  | NA              | 0 | 1238 | 0  | 1238 | 0  | 1238 | 0 | 1238 | C1 | NDUFB3 <sup>Low</sup> |
| TCGA-DJ-A3VE | 50 | MALE   | WHITE | T1 | N0 | M0 | I   | NA | NA         | NA | NO  | No  | NA              | 0 | 577  | 0  | 577  | 0  | 577  | 0 | 577  | C1 | NDUFB3 <sup>Low</sup> |
| TCGA-DJ-A3VF | 60 | FEMALE | WHITE | T3 | N1 | M0 | IV  | NA | NA         | NA | YES | No  | NA              | 0 | 292  | 0  | 292  | NA | NA   | 0 | 292  | C1 | NDUFB3 <sup>Low</sup> |
| TCGA-DJ-A3VM | 68 | FEMALE | WHITE | T2 | N0 | M0 | II  | NA | NA         | NA | YES | No  | NA              | 0 | 840  | 0  | 840  | 0  | 840  | 0 | 840  | C1 | NDUFB3 <sup>Low</sup> |
| TCGA-DJ-A4UQ | 60 | MALE   | ASIAN | T3 | N1 | M0 | IV  | NA | NA         | NA | YES | No  | NA              | 0 | 1005 | 0  | 1005 | NA | NA   | 0 | 1005 | C1 | NDUFB3 <sup>Low</sup> |
| TCGA-DJ-A4UR | 36 | FEMALE | ASIAN | T3 | N1 | M1 | II  | NA | Metastasis | NA | YES | No  | NA              | 0 | 1058 | 0  | 1058 | 1  | 113  | 1 | 113  | C1 | NDUFB3 <sup>Low</sup> |
| TCGA-DJ-A4UT | 32 | FEMALE | WHITE | T1 | N0 | M0 | I   | NA | NA         | NA | NO  | No  | NA              | 0 | 823  | 0  | 823  | 0  | 823  | 0 | 823  | C1 | NDUFB3 <sup>Low</sup> |
| TCGA-DJ-A4V2 | 38 | FEMALE | NA    | T2 | N0 | M0 | I   | NA | NA         | NA | NO  | No  | NA              | 0 | 95   | 0  | 95   | 0  | 95   | 0 | 95   | C1 | NDUFB3 <sup>Low</sup> |
| TCGA-DJ-A4V4 | 48 | FEMALE | WHITE | T1 | N0 | M0 | I   | NA | NA         | NA | NO  | No  | NA              | 0 | 481  | 0  | 481  | 0  | 481  | 0 | 481  | C1 | NDUFB3 <sup>Low</sup> |
| TCGA-DO-A1JZ | 23 | FEMALE | BLACK | T2 | NA | NA | I   | NA | NA         | NA | NA  | No  | Hormone Therapy | 0 | 1670 | 0  | 1670 | NA | NA   | 0 | 1670 | C1 | NDUFB3 <sup>Low</sup> |
| TCGA-DO-A1K0 | 30 | FEMALE | WHITE | T3 | N1 | NA | I   | NA | Recurrence | NA | NA  | No  | Hormone Therapy | 0 | 655  | 0  | 655  | 1  | 577  | 1 | 577  | C1 | NDUFB3 <sup>Low</sup> |
| TCGA-E3-A3E3 | 49 | FEMALE | WHITE | T2 | N0 | M0 | II  | NA | Metastasis | NA | NA  | No  | Hormone Therapy | 0 | 1595 | 0  | 1595 | 1  | 445  | 1 | 445  | C1 | NDUFB3 <sup>Low</sup> |
| TCGA-E8-A242 | 56 | FEMALE | WHITE | T3 | N0 | NA | III | NA | NA         | NA | NA  | No  | Hormone Therapy | 0 | 950  | 0  | 950  | NA | NA   | 0 | 950  | C1 | NDUFB3 <sup>Low</sup> |
| TCGA-E8-A2JQ | 18 | FEMALE | WHITE | T3 | N1 | M0 | I   | NA | NA         | NA | NA  | No  | Hormone Therapy | 0 | 356  | 0  | 356  | NA | NA   | 0 | 356  | C1 | NDUFB3 <sup>Low</sup> |
| TCGA-E8-A3X7 | 57 | FEMALE | WHITE | T4 | N0 | M0 | IV  | NA | NA         | NA | NA  | No  | NA              | 0 | 951  | 0  | 951  | NA | NA   | 0 | 951  | C1 | NDUFB3 <sup>Low</sup> |
| TCGA-E8-A413 | 38 | FEMALE | ASIAN | T1 | N0 | M0 | I   | NA | NA         | NA | NA  | No  | NA              | 0 | 912  | 0  | 912  | 0  | 912  | 0 | 912  | C1 | NDUFB3 <sup>Low</sup> |
| TCGA-E8-A414 | 45 | FEMALE | ASIAN | T3 | N0 | M0 | III | NA | NA         | NA | NA  | No  | NA              | 0 | 958  | 0  | 958  | 0  | 958  | 0 | 958  | C1 | NDUFB3 <sup>Low</sup> |
| TCGA-E8-A417 | 38 | FEMALE | ASIAN | T2 | N1 | M0 | I   | NA | NA         | NA | NA  | No  | NA              | 0 | 938  | 0  | 938  | 0  | 938  | 0 | 938  | C1 | NDUFB3 <sup>Low</sup> |
| TCGA-E8-A419 | 30 | FEMALE | WHITE | T2 | N1 | M0 | I   | NA | NA         | NA | NA  | No  | NA              | 0 | 774  | 0  | 774  | 0  | 774  | 0 | 774  | C1 | NDUFB3 <sup>Low</sup> |
| TCGA-E8-A436 | 53 | FEMALE | ASIAN | T2 | N1 | M0 | IV  | NA | NA         | NA | NA  | No  | NA              | 0 | 455  | 0  | 455  | NA | NA   | 0 | 455  | C1 | NDUFB3 <sup>Low</sup> |
| TCGA-E8-A437 | 57 | FEMALE | WHITE | NA | NA | M0 | I   | NA | NA         | NA | NA  | No  | NA              | 0 | 1213 | 0  | 1213 | NA | NA   | 0 | 1213 | C1 | NDUFB3 <sup>Low</sup> |
| TCGA-E8-A438 | 23 | FEMALE | WHITE | T1 | N0 | M0 | I   | NA | NA         | NA | NA  | No  | NA              | 0 | 1019 | 0  | 1019 | 0  | 1019 | 0 | 1019 | C1 | NDUFB3 <sup>Low</sup> |
| TCGA-E8-A44K | 50 | FEMALE | ASIAN | T1 | N0 | M0 | I   | NA | NA         | NA | NO  | No  | NA              | 0 | 943  | 0  | 943  | 0  | 943  | 0 | 943  | C1 | NDUFB3 <sup>Low</sup> |
| TCGA-EL-A3CL | 70 | FEMALE | WHITE | T2 | NA | M0 | II  | NA | NA         | NA | NO  | No  | NA              | 1 | 963  | NA | 963  | 0  | 963  | 0 | 963  | C1 |                       |
| TCGA-EL-A3CM | 64 | FEMALE | WHITE | T3 | N1 | M0 | III | NA | NA         | NA | YES | No  | NA              | 1 | 813  | NA | 813  | NA | NA   | 0 | 813  | C1 | NDUFB3 <sup>Low</sup> |
| TCGA-EL-A3CN | 47 | FEMALE | WHITE | T3 | N0 | M0 | II  | NA | NA         | NA | YES | No  | NA              | 0 | 4731 | 0  | 4731 | NA | NA   | 0 | 4731 | C1 | NDUFB3 <sup>Low</sup> |
| TCGA-EL-A3CO | 88 | MALE   | WHITE | T3 | N1 | M0 | III | NA | NA         | NA | YES | No  | NA              | 1 | 2973 | NA | 2973 | NA | NA   | 0 | 2973 | C1 | NDUFB3 <sup>Low</sup> |
| TCGA-EL-A3CP | 50 | FEMALE | BLACK | T1 | NA | M0 |     | NA | NA         | NA | YES | No  | NA              | 0 | 4831 | 0  | 4831 | NA | NA   | 0 | 4831 | C1 | NDUFB3 <sup>Low</sup> |
| TCGA-EL-A3CR | 78 | FEMALE | WHITE | T3 | N1 | M0 | III | NA | NA         | NA | NO  | No  | NA              | 1 | 233  | NA | 233  | NA | NA   | 0 | 233  | C1 | NDUFB3 <sup>Low</sup> |
| TCGA-EL-A3CS | 62 | FEMALE | WHITE | T4 | N0 | M0 | IV  | NA | NA         | NA | YES | Yes | NA              | 1 | 1385 | 1  | 1385 | NA | NA   | 1 | 1385 | C1 | NDUFB3 <sup>Low</sup> |
| TCGA-EL-A3CT | 78 | FEMALE | WHITE | T4 | N1 | M0 | IV  | NA | NA         | NA | NO  | No  | NA              | 1 | 1854 | NA | 1854 | NA | NA   | 0 | 1854 | C1 | NDUFB3 <sup>Low</sup> |
| TCGA-EL-A3CU | 70 | FEMALE | WHITE | T1 | N1 | M0 | III | NA | NA         | NA | YES | No  | NA              | 0 | 4780 | 0  | 4780 | 0  | 4780 | 0 | 4780 | C1 | NDUFB3 <sup>Low</sup> |
| TCGA-EL-A3CV | 40 | MALE   | WHITE | T3 | N1 | M0 | I   | NA | NA         | NA | YES | No  | NA              | 0 | 1154 | 0  | 1154 | NA | NA   | 0 | 1154 | C1 | NDUFB3 <sup>Low</sup> |
| TCGA-EL-A3CY | 28 | MALE   | WHITE | NA | N1 | M0 | I   | NA | NA         | NA | NO  | Yes | NA              | 0 | 127  | 0  | 127  | 0  | 127  | 0 | 127  | C1 | NDUFB3 <sup>Low</sup> |
| TCGA-EL-A3D0 | 61 | MALE   | WHITE | T4 | N1 | M0 | III | NA | NA         | NA | YES | No  | NA              | 0 | 4254 | 0  | 4254 | NA | NA   | 0 | 4254 | C1 | NDUFB3 <sup>Low</sup> |
| TCGA-EL-A3D6 | 51 | FEMALE | WHITE | T3 | N1 | M0 | III | NA | NA         | NA | YES | No  | NA              | 0 | 3296 | 0  | 3296 | NA | NA   | 0 | 3296 | C1 | NDUFB3 <sup>Low</sup> |
| TCGA-EL-A3GO | 31 | FEMALE | WHITE | T2 | N0 | M0 | I   | NA | Recurrence | NA | NO  | No  | NA              | 0 | 1973 | 0  | 1973 | 1  | 6    | 1 | 6    | C1 | NDUFB3 <sup>Low</sup> |
| TCGA-EL-A3GP | 70 | MALE   | BLACK | T3 | N1 | M0 | III | NA | NA         | NA | NO  | No  | NA              | 0 | 1506 | 0  | 1506 | 0  | 1506 | 0 | 1506 | C1 | NDUFB3 <sup>Low</sup> |
| TCGA-EL-A3GU | 72 | FEMALE | WHITE | T3 | N1 | M0 | III | NA | Metastasis | NA | NO  | No  | NA              | 0 | 4137 | 0  | 4137 | 1  | 544  | 1 | 544  | C1 | NDUFB3 <sup>Low</sup> |
| TCGA-EL-A3GY | 40 | FEMALE | WHITE | T1 | N1 | M1 | II  | NA | NA         | NA | YES | No  | NA              | 0 | 3076 | 0  | 3076 | 0  | 3076 | 0 | 3076 | C1 | NDUFB3 <sup>Low</sup> |

|              |    |        |       |    |    |    |     |    |            |    |     |    |    |   |      |   |      |    |      |   |      |    |                       |
|--------------|----|--------|-------|----|----|----|-----|----|------------|----|-----|----|----|---|------|---|------|----|------|---|------|----|-----------------------|
| TCGA-EL-A3H4 | 46 | FEMALE | BLACK | T4 | N1 | M0 | IV  | NA | NA         | NA | YES | No | NA | 0 | 1512 | 0 | 1512 | NA | NA   | 0 | 1512 | C1 | NDUFB3 <sup>Low</sup> |
| TCGA-EL-A3H5 | 57 | FEMALE | WHITE | T4 | N1 | M0 | IV  | NA | NA         | NA | YES | No | NA | 0 | 2542 | 0 | 2542 | NA | NA   | 0 | 2542 | C1 | NDUFB3 <sup>Low</sup> |
| TCGA-EL-A3H7 | 36 | FEMALE | WHITE | T3 | N1 | M0 | I   | NA | NA         | NA | NO  | No | NA | 0 | 4228 | 0 | 4228 | 0  | 4228 | 0 | 4228 | C1 | NDUFB3 <sup>Low</sup> |
| TCGA-EL-A3H8 | 35 | FEMALE | WHITE | T3 | N1 | M0 | I   | NA | NA         | NA | NA  | No | NA | 0 | 4577 | 0 | 4577 | 0  | 4577 | 0 | 4577 | C1 | NDUFB3 <sup>Low</sup> |
| TCGA-EL-A3MX | 66 | FEMALE | WHITE | T4 | N1 | M1 | IV  | NA | Metastasis | NA | YES | No | NA | 1 | 1753 | 1 | 1753 | NA | NA   | 1 | 1708 | C1 | NDUFB3 <sup>Low</sup> |
| TCGA-EL-A3MY | 81 | MALE   | WHITE | T4 | NA | M1 | IV  | NA | NA         | NA | YES | No | NA | 1 | 533  | 1 | 533  | NA | NA   | 1 | 533  | C1 | NDUFB3 <sup>Low</sup> |
| TCGA-EL-A3MZ | 66 | MALE   | WHITE | T4 | N1 | NA | III | NA | NA         | NA | YES | No | NA | 1 | 1597 | 0 | 1597 | NA | NA   | 0 | 1597 | C1 | NDUFB3 <sup>Low</sup> |
| TCGA-EL-A3N2 | 24 | FEMALE | WHITE | T2 | N1 | M0 | I   | NA | NA         | NA | YES | No | NA | 0 | 902  | 0 | 902  | 0  | 902  | 0 | 902  | C1 | NDUFB3 <sup>Low</sup> |
| TCGA-EL-A3N3 | 53 | FEMALE | WHITE | T3 | NA | M0 | II  | NA | NA         | NA | YES | No | NA | 0 | 5423 | 0 | 5423 | 0  | 5423 | 0 | 5423 | C1 | NDUFB3 <sup>Low</sup> |
| TCGA-EL-A3T1 | 38 | FEMALE | BLACK | T2 | N0 | M0 | I   | NA | NA         | NA | NO  | No | NA | 0 | 3941 | 0 | 3941 | 0  | 3941 | 0 | 3941 | C1 | NDUFB3 <sup>Low</sup> |
| TCGA-EL-A3T2 | 55 | FEMALE | WHITE | T2 | N1 | M0 | III | NA | Recurrence | NA | YES | No | NA | 0 | 988  | 0 | 988  | 1  | 903  | 1 | 903  | C1 | NDUFB3 <sup>Low</sup> |
| TCGA-EL-A3T3 | 63 | MALE   | WHITE | T2 | N0 | M0 | II  | NA | NA         | NA | YES | No | NA | 0 | 4017 | 0 | 4017 | 0  | 4017 | 0 | 4017 | C1 | NDUFB3 <sup>Low</sup> |
| TCGA-EL-A3T7 | 47 | FEMALE | WHITE | T2 | N0 | M0 | II  | NA | NA         | NA | NO  | No | NA | 0 | 1256 | 0 | 1256 | 0  | 1256 | 0 | 1256 | C1 | NDUFB3 <sup>Low</sup> |
| TCGA-EL-A3ZK | 41 | FEMALE | WHITE | T2 | N1 | M0 | I   | NA | NA         | NA | YES | No | NA | 0 | 1575 | 0 | 1575 | 0  | 1575 | 0 | 1575 | C1 | NDUFB3 <sup>Low</sup> |
| TCGA-EL-A3ZL | 34 | FEMALE | WHITE | T1 | N1 | M0 | I   | NA | NA         | NA | YES | No | NA | 0 | 1895 | 0 | 1895 | 0  | 1895 | 0 | 1895 | C1 | NDUFB3 <sup>Low</sup> |
| TCGA-EL-A3ZP | 19 | MALE   | WHITE | T4 | N1 | M0 | I   | NA | NA         | NA | YES | No | NA | 0 | 1992 | 0 | 1992 | 0  | 1992 | 0 | 1992 | C1 | NDUFB3 <sup>Low</sup> |
| TCGA-EL-A3ZT | 35 | MALE   | WHITE | T3 | N0 | M0 | I   | NA | NA         | NA | YES | No | NA | 0 | 1808 | 0 | 1808 | 0  | 1808 | 0 | 1808 | C1 | NDUFB3 <sup>Low</sup> |
| TCGA-EL-A4JW | 38 | FEMALE | WHITE | T1 | N0 | M0 | I   | NA | NA         | NA | YES | No | NA | 0 | 1056 | 0 | 1056 | 0  | 1056 | 0 | 1056 | C1 | NDUFB3 <sup>Low</sup> |
| TCGA-EL-A4JX | 31 | FEMALE | BLACK | T3 | N0 | NA | I   | NA | NA         | NA | NO  | No | NA | 0 | 1398 | 0 | 1398 | 0  | 1398 | 0 | 1398 | C1 | NDUFB3 <sup>Low</sup> |
| TCGA-EL-A4JZ | 55 | FEMALE | WHITE | T3 | N1 | M0 | III | NA | NA         | NA | NO  | No | NA | 0 | 1856 | 0 | 1856 | 0  | 1856 | 0 | 1856 | C1 | NDUFB3 <sup>Low</sup> |
| TCGA-EL-A4K0 | 54 | FEMALE | WHITE | T1 | N0 | M0 | I   | NA | NA         | NA | NO  | No | NA | 0 | 944  | 0 | 944  | NA | NA   | 0 | 944  | C1 | NDUFB3 <sup>Low</sup> |
| TCGA-EL-A4K1 | 68 | FEMALE | WHITE | T3 | N1 | M0 | III | NA | NA         | NA | NO  | No | NA | 0 | 1046 | 0 | 1046 | 0  | 1046 | 0 | 1046 | C1 | NDUFB3 <sup>Low</sup> |
| TCGA-EL-A4K4 | 33 | FEMALE | WHITE | T3 | N1 | M0 | I   | NA | NA         | NA | YES | No | NA | 0 | 1623 | 0 | 1623 | 0  | 1623 | 0 | 1623 | C1 | NDUFB3 <sup>Low</sup> |
| TCGA-EL-A4K6 | 75 | MALE   | WHITE | T4 | N1 | NA | IV  | NA | Metastasis | NA | YES | No | NA | 0 | 1343 | 0 | 1343 | NA | NA   | 1 | 874  | C1 | NDUFB3 <sup>Low</sup> |
| TCGA-EL-A4K9 | 68 | MALE   | WHITE | T2 | N0 | M0 | II  | NA | NA         | NA | YES | No | NA | 0 | 1455 | 0 | 1455 | 0  | 1455 | 0 | 1455 | C1 | NDUFB3 <sup>Low</sup> |
| TCGA-EL-A4KD | 41 | MALE   | WHITE | T3 | N1 | M0 | I   | NA | NA         | NA | YES | No | NA | 0 | 1326 | 0 | 1326 | 0  | 1326 | 0 | 1326 | C1 | NDUFB3 <sup>Low</sup> |
| TCGA-EL-A4KG | 35 | FEMALE | WHITE | T3 | N0 | M0 | I   | NA | NA         | NA | NO  | No | NA | 0 | 739  | 0 | 739  | 0  | 739  | 0 | 739  | C1 | NDUFB3 <sup>Low</sup> |
| TCGA-EM-A1CS | 55 | FEMALE | NA    | T1 | N0 | NA | I   | NA | NA         | NA | NA  | No | NA | 0 | 817  | 0 | 817  | 0  | 817  | 0 | 817  | C1 | NDUFB3 <sup>Low</sup> |
| TCGA-EM-A1CT | 76 | MALE   | NA    | T1 | N1 | NA | IV  | NA | NA         | NA | NA  | No | NA | 0 | 553  | 0 | 553  | NA | NA   | 0 | 553  | C1 | NDUFB3 <sup>Low</sup> |
| TCGA-EM-A1CU | 31 | MALE   | NA    | T3 | N1 | M0 | I   | NA | NA         | NA | NA  | No | NA | 0 | 636  | 0 | 636  | NA | NA   | 0 | 636  | C1 | NDUFB3 <sup>Low</sup> |
| TCGA-EM-A1CV | 32 | FEMALE | NA    | T1 | N0 | NA | I   | NA | NA         | NA | NA  | No | NA | 0 | 1475 | 0 | 1475 | NA | NA   | 0 | 1475 | C1 | NDUFB3 <sup>Low</sup> |
| TCGA-EM-A1YC | 71 | FEMALE | NA    | T3 | N0 | NA | III | NA | NA         | NA | NA  | No | NA | 0 | 2391 | 0 | 2391 | 0  | 2391 | 0 | 2391 | C1 | NDUFB3 <sup>Low</sup> |
| TCGA-EM-A22I | 52 | FEMALE | NA    | T3 | N0 | NA | III | NA | NA         | NA | NA  | No | NA | 0 | 448  | 0 | 448  | NA | NA   | 0 | 448  | C1 | NDUFB3 <sup>Low</sup> |
| TCGA-EM-A22M | 52 | MALE   | ASIAN | T1 | N0 | NA | I   | NA | NA         | NA | NA  | No | NA | 0 | 442  | 0 | 442  | 0  | 442  | 0 | 442  | C1 | NDUFB3 <sup>Low</sup> |
| TCGA-EM-A22N | 68 | FEMALE | NA    | T1 | N0 | NA | I   | NA | NA         | NA | NA  | No | NA | 0 | 324  | 0 | 324  | NA | NA   | 0 | 324  | C1 | NDUFB3 <sup>Low</sup> |
| TCGA-EM-A22O | 75 | MALE   | ASIAN | T4 | N1 | NA | IV  | NA | NA         | NA | NA  | No | NA | 0 | 1344 | 0 | 1344 | NA | NA   | 0 | 1344 | C1 | NDUFB3 <sup>Low</sup> |
| TCGA-EM-A22P | 64 | MALE   | NA    | T1 | N1 | NA | IV  | NA | NA         | NA | NA  | No | NA | 0 | 1256 | 0 | 1256 | NA | NA   | 0 | 1256 | C1 | NDUFB3 <sup>Low</sup> |
| TCGA-EM-A22Q | 36 | MALE   | NA    | T3 | N0 | NA | I   | NA | NA         | NA | NA  | No | NA | 0 | 433  | 0 | 433  | 0  | 433  | 0 | 433  | C1 | NDUFB3 <sup>Low</sup> |
| TCGA-EM-A2CM | 62 | FEMALE | NA    | T3 | N0 | NA | III | NA | NA         | NA | NA  | No | NA | 0 | 1253 | 0 | 1253 | 0  | 1253 | 0 | 1253 | C1 | NDUFB3 <sup>Low</sup> |
| TCGA-EM-A2CN | 62 | MALE   | NA    | T3 | N0 | M1 | IV  | NA | NA         | NA | NA  | No | NA | 0 | 715  | 0 | 715  | NA | NA   | 0 | 715  | C1 | NDUFB3 <sup>Low</sup> |

|                |    |        |       |    |    |    |     |    |            |    |     |    |    |   |      |   |      |    |      |   |      |    |                       |
|----------------|----|--------|-------|----|----|----|-----|----|------------|----|-----|----|----|---|------|---|------|----|------|---|------|----|-----------------------|
| TCGA-EM-A2CO   | 77 | FEMALE | NA    | T2 | NA | NA | II  | NA | NA         | NA | NA  | No | NA | 0 | 184  | 0 | 184  | 0  | 184  | 0 | 184  | C1 | NDUFB3 <sup>Low</sup> |
| TCGA-EM-A2CR   | 46 | FEMALE | NA    | T2 | N0 | NA | II  | NA | NA         | NA | NA  | No | NA | 0 | 415  | 0 | 415  | 0  | 415  | 0 | 415  | C1 | NDUFB3 <sup>Low</sup> |
| TCGA-EM-A2CS.1 | 51 | FEMALE | NA    | T3 | N1 | NA | IV  | NA | NA         | NA | NA  | No | NA | 0 | 841  | 0 | 841  | NA | NA   | 0 | 841  | C1 | NDUFB3 <sup>Low</sup> |
| TCGA-EM-A2OY   | 46 | FEMALE | NA    | T2 | N0 | NA | II  | NA | NA         | NA | NA  | No | NA | 0 | 983  | 0 | 983  | 0  | 983  | 0 | 983  | C1 | NDUFB3 <sup>Low</sup> |
| TCGA-EM-A2P1.1 | 33 | MALE   | NA    | T2 | N1 | NA | I   | NA | Recurrence | NA | NA  | No | NA | 0 | 531  | 0 | 531  | 1  | 363  | 1 | 363  | C1 |                       |
| TCGA-EM-A3AO   | 61 | MALE   | NA    | T2 | N1 | NA | IV  | NA | NA         | NA | NA  | No | NA | 0 | 1354 | 0 | 1354 | NA | NA   | 0 | 1354 | C1 | NDUFB3 <sup>Low</sup> |
| TCGA-EM-A3FM   | 57 | MALE   | NA    | T2 | N1 | NA | IV  | NA | Recurrence | NA | NA  | No | NA | 0 | 639  | 0 | 639  | NA | NA   | 1 | 514  | C1 | NDUFB3 <sup>Low</sup> |
| TCGA-EM-A3FO   | 40 | MALE   | NA    | T3 | N0 | NA | I   | NA | NA         | NA | NA  | No | NA | 0 | 532  | 0 | 532  | 0  | 532  | 0 | 532  | C1 | NDUFB3 <sup>Low</sup> |
| TCGA-EM-A4FF   | 40 | FEMALE | NA    | T1 | N1 | NA | I   | NA | Recurrence | NA | YES | No | NA | 0 | 2573 | 0 | 2573 | NA | NA   | 1 | 1785 | C1 | NDUFB3 <sup>Low</sup> |
| TCGA-EM-A4FM   | 59 | FEMALE | NA    | T3 | N1 | NA | IV  | NA | NA         | NA | YES | No | NA | 0 | 162  | 0 | 162  | NA | NA   | 0 | 162  | C1 | NDUFB3 <sup>Low</sup> |
| TCGA-EM-A4FN   | 49 | FEMALE | NA    | T1 | N1 | NA | IV  | NA | NA         | NA | YES | No | NA | 0 | 802  | 0 | 802  | NA | NA   | 0 | 802  | C1 | NDUFB3 <sup>Low</sup> |
| TCGA-EM-A4FO   | 72 | MALE   | NA    | T1 | N0 | NA | I   | NA | NA         | NA | YES | No | NA | 0 | 802  | 0 | 802  | 0  | 802  | 0 | 802  | C1 | NDUFB3 <sup>Low</sup> |
| TCGA-EM-A4FQ   | 42 | FEMALE | NA    | T2 | N1 | NA | I   | NA | NA         | NA | YES | No | NA | 0 | 683  | 0 | 683  | 0  | 683  | 0 | 683  | C1 | NDUFB3 <sup>Low</sup> |
| TCGA-EM-A4FR   | 28 | MALE   | NA    | T3 | N1 | NA | I   | NA | NA         | NA | YES | No | NA | 0 | 655  | 0 | 655  | 0  | 655  | 0 | 655  | C1 | NDUFB3 <sup>Low</sup> |
| TCGA-EM-A4FU   | 35 | MALE   | NA    | T3 | NA | NA | I   | NA | Recurrence | NA | YES | No | NA | 0 | 1840 | 0 | 1840 | 1  | 781  | 1 | 781  | C1 | NDUFB3 <sup>Low</sup> |
| TCGA-ET-A25G   | 56 | FEMALE | WHITE | T3 | N0 | NA | III | NA | NA         | NA | NA  | No | NA | 0 | 2492 | 0 | 2492 | 0  | 2492 | 0 | 2492 | C1 | NDUFB3 <sup>Low</sup> |
| TCGA-ET-A25K   | 36 | FEMALE | WHITE | T2 | N1 | NA | I   | NA | NA         | NA | NA  | No | NA | 0 | 2142 | 0 | 2142 | 0  | 2142 | 0 | 2142 | C1 | NDUFB3 <sup>Low</sup> |
| TCGA-ET-A25L   | 52 | FEMALE | WHITE | T3 | N1 | NA | IV  | NA | NA         | NA | NA  | No | NA | 0 | 1721 | 0 | 1721 | NA | NA   | 0 | 1721 | C1 | NDUFB3 <sup>Low</sup> |
| TCGA-ET-A25M   | 33 | MALE   | WHITE | T2 | N1 | NA | I   | NA | NA         | NA | NA  | No | NA | 0 | 1831 | 0 | 1831 | 0  | 1831 | 0 | 1831 | C1 | NDUFB3 <sup>Low</sup> |
| TCGA-ET-A25N   | 28 | FEMALE | WHITE | T2 | N1 | NA | I   | NA | NA         | NA | NA  | No | NA | 0 | 1928 | 0 | 1928 | 0  | 1928 | 0 | 1928 | C1 | NDUFB3 <sup>Low</sup> |
| TCGA-ET-A25O   | 35 | FEMALE | BLACK | T2 | N1 | NA | I   | NA | NA         | NA | NA  | No | NA | 0 | 1986 | 0 | 1986 | 0  | 1986 | 0 | 1986 | C1 | NDUFB3 <sup>Low</sup> |
| TCGA-ET-A25R   | 51 | FEMALE | WHITE | T3 | NA | NA | III | NA | NA         | NA | NA  | No | NA | 0 | 1930 | 0 | 1930 | 0  | 1930 | 0 | 1930 | C1 | NDUFB3 <sup>Low</sup> |
| TCGA-ET-A2MX   | 27 | MALE   | WHITE | T2 | N1 | NA | I   | NA | NA         | NA | YES | No | NA | 0 | 2689 | 0 | 2689 | 0  | 2689 | 0 | 2689 | C1 | NDUFB3 <sup>Low</sup> |
| TCGA-ET-A2MY   | 72 | FEMALE | BLACK | T1 | NA | NA | I   | NA | NA         | NA | NA  | No | NA | 0 | 1787 | 0 | 1787 | 0  | 1787 | 0 | 1787 | C1 | NDUFB3 <sup>Low</sup> |
| TCGA-ET-A2N4   | 53 | FEMALE | WHITE | T3 | N0 | NA | III | NA | NA         | NA | NA  | No | NA | 0 | 81   | 0 | 81   | NA | NA   | 0 | 81   | C1 | NDUFB3 <sup>Low</sup> |
| TCGA-ET-A39J   | 23 | FEMALE | WHITE | T2 | NA | NA | I   | NA | NA         | NA | NA  | No | NA | 0 | 3227 | 0 | 3227 | 0  | 3227 | 0 | 3227 | C1 | NDUFB3 <sup>Low</sup> |
| TCGA-ET-A39K   | 48 | FEMALE | WHITE | T3 | N1 | NA | III | NA | Recurrence | NA | NA  | No | NA | 0 | 3267 | 0 | 3267 | NA | NA   | 1 | 711  | C1 | NDUFB3 <sup>Low</sup> |
| TCGA-ET-A39M   | 34 | MALE   | WHITE | T2 | NA | NA | I   | NA | NA         | NA | NA  | No | NA | 0 | 2582 | 0 | 2582 | 0  | 2582 | 0 | 2582 | C1 | NDUFB3 <sup>Low</sup> |
| TCGA-ET-A39N   | 35 | FEMALE | WHITE | T3 | NA | NA | I   | NA | NA         | NA | NA  | No | NA | 0 | 3751 | 0 | 3751 | 0  | 3751 | 0 | 3751 | C1 | NDUFB3 <sup>Low</sup> |
| TCGA-ET-A39O   | 39 | MALE   | WHITE | T1 | N0 | NA | I   | NA | NA         | NA | NA  | No | NA | 0 | 3059 | 0 | 3059 | 0  | 3059 | 0 | 3059 | C1 | NDUFB3 <sup>Low</sup> |
| TCGA-ET-A3BN   | 33 | FEMALE | ASIAN | T2 | NA | NA | I   | NA | NA         | NA | NA  | No | NA | 0 | 859  | 0 | 859  | 0  | 859  | 0 | 859  | C1 | NDUFB3 <sup>Low</sup> |
| TCGA-ET-A3BO   | 44 | FEMALE | WHITE | T3 | N1 | NA | I   | NA | NA         | NA | NA  | No | NA | 0 | 1533 | 0 | 1533 | NA | NA   | 0 | 1533 | C1 | NDUFB3 <sup>Low</sup> |
| TCGA-ET-A3BP   | 34 | FEMALE | WHITE | T2 | N1 | NA | I   | NA | NA         | NA | NA  | No | NA | 0 | 2406 | 0 | 2406 | 0  | 2406 | 0 | 2406 | C1 | NDUFB3 <sup>Low</sup> |
| TCGA-ET-A3BQ   | 27 | FEMALE | WHITE | T2 | N0 | NA | I   | NA | NA         | NA | NA  | No | NA | 0 | 2331 | 0 | 2331 | 0  | 2331 | 0 | 2331 | C1 | NDUFB3 <sup>Low</sup> |
| TCGA-ET-A3BT   | 60 | FEMALE | WHITE | T2 | N1 | NA | IV  | NA | Recurrence | NA | NA  | No | NA | 0 | 2665 | 0 | 2665 | NA | NA   | 1 | 267  | C1 | NDUFB3 <sup>Low</sup> |
| TCGA-ET-A3BU   | 28 | MALE   | WHITE | T1 | N1 | NA | I   | NA | NA         | NA | NA  | No | NA | 0 | 2367 | 0 | 2367 | 0  | 2367 | 0 | 2367 | C1 | NDUFB3 <sup>Low</sup> |
| TCGA-ET-A3BV   | 47 | FEMALE | WHITE | T2 | N1 | NA | III | NA | Recurrence | NA | NA  | No | NA | 0 | 2294 | 0 | 2294 | 1  | 1204 | 1 | 1204 | C1 | NDUFB3 <sup>Low</sup> |
| TCGA-ET-A3BW   | 30 | FEMALE | WHITE | T2 | NA | NA | I   | NA | NA         | NA | NA  | No | NA | 0 | 1419 | 0 | 1419 | 0  | 1419 | 0 | 1419 | C1 | NDUFB3 <sup>Low</sup> |
| TCGA-ET-A3BX   | 24 | MALE   | WHITE | T3 | N1 | NA | I   | NA | NA         | NA | NA  | No | NA | 0 | 1596 | 0 | 1596 | 0  | 1596 | 0 | 1596 | C1 | NDUFB3 <sup>Low</sup> |
| TCGA-ET-A3DO   | 33 | FEMALE | WHITE | T2 | NA | NA | I   | NA | Recurrence | NA | NA  | No | NA | 0 | 3552 | 0 | 3552 | 1  | 570  | 1 | 570  | C1 | NDUFB3 <sup>Low</sup> |

|              |    |        |       |    |    |    |     |    |            |    |     |    |                 |   |      |   |      |    |      |   |      |    |                       |
|--------------|----|--------|-------|----|----|----|-----|----|------------|----|-----|----|-----------------|---|------|---|------|----|------|---|------|----|-----------------------|
| TCGA-ET-A3DP | 43 | FEMALE | BLACK | T2 | NA | NA | I   | NA | NA         | NA | NA  | No | NA              | 0 | 2877 | 0 | 2877 | 0  | 2877 | 0 | 2877 | C1 | NDUFB3 <sup>Low</sup> |
| TCGA-ET-A3DQ | 43 | FEMALE | WHITE | T1 | N0 | NA | I   | NA | NA         | NA | NA  | No | NA              | 0 | 2581 | 0 | 2581 | 0  | 2581 | 0 | 2581 | C1 | NDUFB3 <sup>Low</sup> |
| TCGA-ET-A3DR | 42 | FEMALE | WHITE | T1 | N1 | NA | I   | NA | NA         | NA | NA  | No | NA              | 0 | 2451 | 0 | 2451 | 0  | 2451 | 0 | 2451 | C1 | NDUFB3 <sup>Low</sup> |
| TCGA-ET-A3DU | 21 | FEMALE | WHITE | T1 | N1 | NA | I   | NA | NA         | NA | NA  | No | NA              | 0 | 1911 | 0 | 1911 | NA | NA   | 0 | 1911 | C1 | NDUFB3 <sup>Low</sup> |
| TCGA-ET-A3DW | 64 | MALE   | ASIAN | T2 | N1 | NA | III | NA | NA         | NA | NA  | No | NA              | 0 | 752  | 0 | 752  | 0  | 752  | 0 | 752  | C1 | NDUFB3 <sup>Low</sup> |
| TCGA-ET-A40Q | 38 | MALE   | WHITE | T3 | N1 | NA | I   | NA | Metastasis | NA | YES | No | NA              | 0 | 1407 | 0 | 1407 | 1  | 218  | 1 | 218  | C1 | NDUFB3 <sup>Low</sup> |
| TCGA-ET-A4KN | 51 | FEMALE | WHITE | T3 | N0 | NA | III | NA | NA         | NA | YES | No | NA              | 0 | 1009 | 0 | 1009 | 0  | 1009 | 0 | 1009 | C1 | NDUFB3 <sup>Low</sup> |
| TCGA-FE-A22Z | 61 | FEMALE | WHITE | T4 | N1 | NA | IV  | NA | Recurrence | NA | NA  | No | NA              | 0 | 2243 | 0 | 2243 | NA | NA   | 1 | 1215 | C1 | NDUFB3 <sup>Low</sup> |
| TCGA-FE-A230 | 30 | FEMALE | WHITE | T3 | N1 | NA | I   | NA | Recurrence | NA | NA  | No | NA              | 0 | 2173 | 0 | 2173 | 1  | 526  | 1 | 526  | C1 | NDUFB3 <sup>Low</sup> |
| TCGA-FE-A233 | 18 | FEMALE | WHITE | T2 | NA | NA | I   | NA | Recurrence | NA | NA  | No | NA              | 0 | 751  | 0 | 751  | 1  | 567  | 1 | 567  | C1 | NDUFB3 <sup>Low</sup> |
| TCGA-FE-A234 | 26 | FEMALE | WHITE | T2 | N1 | NA | I   | NA | Recurrence | NA | NA  | No | NA              | 0 | 2075 | 0 | 2075 | 1  | 483  | 1 | 483  | C1 | NDUFB3 <sup>Low</sup> |
| TCGA-FE-A236 | 33 | MALE   | WHITE | T2 | N1 | NA | I   | NA | NA         | NA | NA  | No | NA              | 0 | 2031 | 0 | 2031 | 0  | 2031 | 0 | 2031 | C1 | NDUFB3 <sup>Low</sup> |
| TCGA-FE-A237 | 19 | FEMALE | WHITE | T3 | N1 | NA | I   | NA | Recurrence | NA | NA  | No | NA              | 0 | 3431 | 0 | 3431 | 1  | 492  | 1 | 492  | C1 | NDUFB3 <sup>Low</sup> |
| TCGA-FE-A238 | 36 | FEMALE | WHITE | T3 | N0 | NA | I   | NA | Metastasis | NA | NA  | No | NA              | 0 | 1215 | 0 | 1215 | 1  | 431  | 1 | 431  | C1 | NDUFB3 <sup>Low</sup> |
| TCGA-FE-A23A | 27 | FEMALE | WHITE | T2 | N0 | NA | I   | NA | NA         | NA | NA  | No | NA              | 0 | 2489 | 0 | 2489 | 0  | 2489 | 0 | 2489 | C1 | NDUFB3 <sup>Low</sup> |
| TCGA-FE-A3PA | 16 | MALE   | WHITE | T4 | N0 | M1 | II  | NA | NA         | NA | NA  | No | NA              | 0 | 3235 | 0 | 3235 | NA | NA   | 0 | 3235 | C1 | NDUFB3 <sup>Low</sup> |
| TCGA-FE-A3PB | 33 | FEMALE | WHITE | T3 | N1 | NA | I   | NA | NA         | NA | NA  | No | NA              | 0 | 2590 | 0 | 2590 | 0  | 2590 | 0 | 2590 | C1 | NDUFB3 <sup>Low</sup> |
| TCGA-FE-A3PC | 37 | FEMALE | WHITE | T3 | N1 | NA | I   | NA | NA         | NA | NA  | No | NA              | 0 | 2606 | 0 | 2606 | 0  | 2606 | 0 | 2606 | C1 | NDUFB3 <sup>Low</sup> |
| TCGA-FK-A3SH | 50 | FEMALE | WHITE | T2 | N1 | NA | III | NA | NA         | NA | YES | No | NA              | 0 | 1463 | 0 | 1463 | 0  | 1463 | 0 | 1463 | C1 | NDUFB3 <sup>Low</sup> |
| TCGA-FK-A4UB | 51 | MALE   | WHITE | T3 | N1 | NA | III | NA | NA         | NA | YES | No | NA              | 0 | 3531 | 0 | 3531 | NA | NA   | 0 | 3531 | C1 | NDUFB3 <sup>Low</sup> |
| TCGA-FY-A3BL | 29 | MALE   | WHITE | T1 | NA | M0 | I   | NA | NA         | NA | NA  | No | NA              | 0 | 621  | 0 | 621  | 0  | 621  | 0 | 621  | C1 | NDUFB3 <sup>Low</sup> |
| TCGA-FY-A3I4 | 34 | FEMALE | WHITE | T2 | N0 | M0 | I   | NA | NA         | NA | NA  | No | NA              | 0 | 542  | 0 | 542  | 0  | 542  | 0 | 542  | C1 | NDUFB3 <sup>Low</sup> |
| TCGA-FY-A3I5 | 64 | FEMALE | WHITE | T3 | N0 | NA | III | NA | NA         | NA | NA  | No | NA              | 0 | 238  | 0 | 238  | 0  | 238  | 0 | 238  | C1 | NDUFB3 <sup>Low</sup> |
| TCGA-FY-A3NN | 48 | FEMALE | NA    | T1 | N1 | NA | III | NA | NA         | NA | NA  | No | NA              | 0 | 0    | 0 | 0    | 0  | 0    | 0 | 0    | C1 | NDUFB3 <sup>Low</sup> |
| TCGA-FY-A3YR | 64 | FEMALE | WHITE | T3 | N1 | NA | III | NA | NA         | NA | YES | No | Hormone Therapy | 0 | 528  | 0 | 528  | 0  | 528  | 0 | 528  | C1 | NDUFB3 <sup>Low</sup> |
| TCGA-FY-A40K | 46 | FEMALE | WHITE | T1 | N0 | NA | I   | NA | NA         | NA | YES | No | Hormone Therapy | 0 | 461  | 0 | 461  | 0  | 461  | 0 | 461  | C1 |                       |
| TCGA-FY-A40L | 55 | FEMALE | WHITE | T4 | N1 | NA | IV  | NA | NA         | NA | YES | No | Hormone Therapy | 0 | 726  | 0 | 726  | NA | NA   | 0 | 726  | C1 | NDUFB3 <sup>Low</sup> |
| TCGA-FY-A40M | 51 | FEMALE | WHITE | T1 | N0 | NA | I   | NA | NA         | NA | YES | No | Hormone Therapy | 0 | 684  | 0 | 684  | 0  | 684  | 0 | 684  | C1 | NDUFB3 <sup>Low</sup> |
| TCGA-FY-A4B3 | 51 | MALE   | WHITE | T3 | N1 | NA | III | NA | NA         | NA | NA  | No | NA              | 0 | 427  | 0 | 427  | NA | NA   | 0 | 427  | C1 | NDUFB3 <sup>Low</sup> |
| TCGA-FY-A4B4 | 62 | FEMALE | WHITE | T1 | N1 | NA | III | NA | NA         | NA | NA  | No | Hormone Therapy | 0 | 657  | 0 | 657  | NA | NA   | 0 | 657  | C1 | NDUFB3 <sup>Low</sup> |
| TCGA-GE-A2C6 | 33 | FEMALE | WHITE | T2 | N1 | NA | I   | NA | NA         | NA | NA  | No | NA              | 0 | 381  | 0 | 381  | NA | NA   | 0 | 381  | C1 | NDUFB3 <sup>Low</sup> |
| TCGA-H2-A26U | 54 | FEMALE | WHITE | T3 | N0 | NA | III | NA | NA         | NA | NA  | No | NA              | 0 | 517  | 0 | 517  | NA | NA   | 0 | 517  | C1 | NDUFB3 <sup>Low</sup> |
| TCGA-H2-A3RI | 29 | FEMALE | WHITE | T3 | N0 | NA | I   | NA | Recurrence | NA | NA  | No | NA              | 0 | 335  | 0 | 335  | NA | NA   | 1 | 279  | C1 | NDUFB3 <sup>Low</sup> |
| TCGA-H2-A421 | 34 | FEMALE | WHITE | T1 | N1 | M0 | I   | NA | NA         | NA | YES | No | NA              | 0 | 610  | 0 | 610  | NA | NA   | 0 | 610  | C1 | NDUFB3 <sup>Low</sup> |
| TCGA-H2-A422 | 40 | FEMALE | WHITE | T2 | N0 | NA | I   | NA | NA         | NA | YES | No | NA              | 0 | 566  | 0 | 566  | NA | NA   | 0 | 566  | C1 | NDUFB3 <sup>Low</sup> |
| TCGA-IM-A3ED | 58 | FEMALE | WHITE | T1 | N0 | NA | I   | NA | NA         | NA | NA  | No | Hormone Therapy | 0 | 1442 | 0 | 1442 | 0  | 1442 | 0 | 1442 | C1 | NDUFB3 <sup>Low</sup> |
| TCGA-IM-A3U2 | 89 | FEMALE | WHITE | T3 | N1 | NA | IV  | NA | NA         | NA | NA  | No | NA              | 0 | 563  | 0 | 563  | NA | NA   | 0 | 563  | C1 | NDUFB3 <sup>Low</sup> |
| TCGA-IM-A3U3 | 55 | FEMALE | WHITE | T1 | N0 | NA | I   | NA | NA         | NA | NA  | No | NA              | 0 | 514  | 0 | 514  | NA | NA   | 0 | 514  | C1 | NDUFB3 <sup>Low</sup> |
| TCGA-IM-A41Y | 42 | FEMALE | WHITE | T3 | N1 | NA | I   | NA | NA         | NA | NO  | No | Hormone Therapy | 0 | 664  | 0 | 664  | 0  | 664  | 0 | 664  | C1 | NDUFB3 <sup>Low</sup> |
| TCGA-IM-A420 | 39 | FEMALE | WHITE | T2 | N1 | NA | I   | NA | NA         | NA | NO  | No | NA              | 0 | 250  | 0 | 250  | 0  | 250  | 0 | 250  | C1 | NDUFB3 <sup>Low</sup> |

|              |    |        |       |    |    |    |     |    |            |    |     |    |                 |   |      |   |      |    |      |   |      |    |                        |
|--------------|----|--------|-------|----|----|----|-----|----|------------|----|-----|----|-----------------|---|------|---|------|----|------|---|------|----|------------------------|
| TCGA-IM-A4EB | 37 | MALE   | WHITE | T3 | N1 | NA | I   | NA | NA         | NA | YES | No | NA              | 0 | 780  | 0 | 780  | 0  | 780  | 0 | 780  | C1 | NDUFB3 <sup>Low</sup>  |
| TCGA-J8-A3YG | 54 | FEMALE | WHITE | T2 | N1 | M0 | III | NA | NA         | NA | YES | No | NA              | 0 | 678  | 0 | 678  | 0  | 678  | 0 | 678  | C1 | NDUFB3 <sup>Low</sup>  |
| TCGA-KS-A41F | 37 | FEMALE | WHITE | T2 | N1 | M0 | I   | NA | NA         | NA | YES | No | Hormone Therapy | 0 | 4367 | 0 | 4367 | 0  | 4367 | 0 | 4367 | C1 | NDUFB3 <sup>Low</sup>  |
| TCGA-KS-A41I | 47 | FEMALE | WHITE | T1 | N0 | M0 | I   | NA | NA         | NA | YES | No | Hormone Therapy | 0 | 486  | 0 | 486  | 0  | 486  | 0 | 486  | C1 | NDUFB3 <sup>Low</sup>  |
| TCGA-KS-A41L | 39 | FEMALE | WHITE | T2 | N0 | M0 | I   | NA | NA         | NA | YES | No | Hormone Therapy | 0 | 3463 | 0 | 3463 | 0  | 3463 | 0 | 3463 | C1 | NDUFB3 <sup>Low</sup>  |
| TCGA-KS-A4I1 | 37 | FEMALE | ASIAN | T2 | N0 | M0 | I   | NA | NA         | NA | YES | No | Hormone Therapy | 0 | 812  | 0 | 812  | NA | NA   | 0 | 812  | C1 | NDUFB3 <sup>Low</sup>  |
| TCGA-KS-A4I3 | 41 | MALE   | ASIAN | T3 | N1 | M0 | I   | NA | NA         | NA | YES | No | Hormone Therapy | 0 | 1329 | 0 | 1329 | NA | NA   | 0 | 1329 | C1 | NDUFB3 <sup>Low</sup>  |
| TCGA-KS-A4I5 | 49 | FEMALE | WHITE | T1 | N1 | M0 | IV  | NA | NA         | NA | YES | No | Hormone Therapy | 0 | 567  | 0 | 567  | NA | NA   | 0 | 567  | C1 | NDUFB3 <sup>Low</sup>  |
| TCGA-KS-A4I9 | 46 | FEMALE | BLACK | T1 | N0 | M0 | I   | NA | NA         | NA | YES | No | Hormone Therapy | 0 | 2658 | 0 | 2658 | 0  | 2658 | 0 | 2658 | C1 | NDUFB3 <sup>Low</sup>  |
| TCGA-KS-A4IB | 41 | FEMALE | ASIAN | T2 | N1 | M0 | I   | NA | NA         | NA | YES | No | Hormone Therapy | 0 | 2577 | 0 | 2577 | 0  | 2577 | 0 | 2577 | C1 | NDUFB3 <sup>Low</sup>  |
| TCGA-KS-A4IC | 45 | FEMALE | WHITE | T1 | N1 | M0 | III | NA | NA         | NA | YES | No | Hormone Therapy | 0 | 1073 | 0 | 1073 | NA | NA   | 0 | 1073 | C1 | NDUFB3 <sup>Low</sup>  |
| TCGA-KS-A4ID | 55 | FEMALE | WHITE | T1 | N0 | M0 | I   | NA | NA         | NA | NO  | No | Hormone Therapy | 0 | 1011 | 0 | 1011 | 0  | 1011 | 0 | 1011 | C1 | NDUFB3 <sup>Low</sup>  |
| TCGA-L6-A4EQ | 47 | MALE   | WHITE | T2 | N1 | M0 | III | NA | NA         | NA | YES | No | NA              | 0 | 1228 | 0 | 1228 | 0  | 1228 | 0 | 1228 | C1 | NDUFB3 <sup>Low</sup>  |
| TCGA-L6-A4EU | 58 | FEMALE | BLACK | T3 | N1 | M0 | III | NA | NA         | NA | YES | No | NA              | 0 | 289  | 0 | 289  | NA | NA   | 0 | 289  | C1 | NDUFB3 <sup>Low</sup>  |
| TCGA-MK-A4N6 | 35 | MALE   | WHITE | T3 | N1 | M0 | I   | NA | NA         | NA | YES | No | Hormone Therapy | 0 | 1098 | 0 | 1098 | 0  | 1098 | 0 | 1098 | C1 | NDUFB3 <sup>Low</sup>  |
| TCGA-MK-A4N7 | 20 | FEMALE | WHITE | T2 | N0 | M0 | I   | NA | NA         | NA | YES | No | Hormone Therapy | 0 | 987  | 0 | 987  | 0  | 987  | 0 | 987  | C1 | NDUFB3 <sup>Low</sup>  |
| TCGA-MK-A4N9 | 41 | FEMALE | WHITE | T3 | N1 | M0 | I   | NA | NA         | NA | YES | No | Hormone Therapy | 0 | 919  | 0 | 919  | 0  | 919  | 0 | 919  | C1 | NDUFB3 <sup>Low</sup>  |
| TCGA-J8-A3YH | 39 | MALE   | WHITE | T3 | N1 | M0 | I   | NA | NA         | NA | YES | No | NA              | 0 | 175  | 0 | 175  | 0  | 175  | 0 | 175  | C2 | NDUFB3 <sup>High</sup> |
| TCGA-BJ-A0YZ | 65 | MALE   | WHITE | T2 | N0 | M0 | II  | NA | NA         | NA | NA  | No | NA              | 0 | 754  | 0 | 754  | 0  | 754  | 0 | 754  | C2 | NDUFB3 <sup>High</sup> |
| TCGA-BJ-A0Z0 | 55 | MALE   | NA    | T2 | N0 | NA | II  | NA | NA         | NA | NA  | No | NA              | 0 | 419  | 0 | 419  | 0  | 419  | 0 | 419  | C2 | NDUFB3 <sup>High</sup> |
| TCGA-BJ-A0Z3 | 33 | FEMALE | WHITE | T1 | N0 | M0 | I   | NA | NA         | NA | NA  | No | NA              | 0 | 497  | 0 | 497  | NA | NA   | 0 | 497  | C2 | NDUFB3 <sup>High</sup> |
| TCGA-BJ-A0ZA | 67 | FEMALE | WHITE | T2 | N0 | M0 | II  | NA | NA         | NA | NA  | No | NA              | 0 | 574  | 0 | 574  | 0  | 574  | 0 | 574  | C2 | NDUFB3 <sup>High</sup> |
| TCGA-BJ-A0ZC | 55 | MALE   | WHITE | T1 | N0 | M0 | I   | NA | NA         | NA | NA  | No | NA              | 0 | 352  | 0 | 352  | 0  | 352  | 0 | 352  | C2 | NDUFB3 <sup>High</sup> |
| TCGA-BJ-A0ZF | 54 | FEMALE | WHITE | T2 | N0 | M0 | II  | NA | Recurrence | NA | NA  | No | NA              | 0 | 1217 | 0 | 1217 | 1  | 735  | 1 | 735  | C2 | NDUFB3 <sup>High</sup> |
| TCGA-BJ-A0ZG | 80 | MALE   | WHITE | T1 | N0 | M0 | I   | NA | NA         | NA | NA  | No | NA              | 0 | 775  | 0 | 775  | NA | NA   | 0 | 775  | C2 | NDUFB3 <sup>High</sup> |
| TCGA-BJ-A18Y | 29 | MALE   | WHITE | T1 | N0 | NA | I   | NA | NA         | NA | NA  | No | NA              | 0 | 1563 | 0 | 1563 | 0  | 1563 | 0 | 1563 | C2 | NDUFB3 <sup>High</sup> |
| TCGA-BJ-A192 | 54 | FEMALE | WHITE | T3 | NA | M0 | III | NA | NA         | NA | NA  | No | NA              | 0 | 1349 | 0 | 1349 | NA | NA   | 0 | 1349 | C2 | NDUFB3 <sup>High</sup> |
| TCGA-BJ-A28T | 34 | FEMALE | WHITE | T1 | N1 | M0 | I   | NA | NA         | NA | NA  | No | NA              | 0 | 1081 | 0 | 1081 | NA | NA   | 0 | 1081 | C2 | NDUFB3 <sup>High</sup> |
| TCGA-BJ-A28V | 80 | FEMALE | WHITE | T3 | N0 | NA | III | NA | NA         | NA | NA  | No | NA              | 0 | 987  | 0 | 987  | NA | NA   | 0 | 987  | C2 | NDUFB3 <sup>High</sup> |
| TCGA-BJ-A28W | 32 | FEMALE | WHITE | T2 | N0 | M0 | I   | NA | NA         | NA | NA  | No | NA              | 0 | 344  | 0 | 344  | NA | NA   | 0 | 344  | C2 | NDUFB3 <sup>High</sup> |
| TCGA-BJ-A290 | 70 | MALE   | WHITE | T3 | N1 | M0 | III | NA | Metastasis | NA | NA  | No | NA              | 0 | 919  | 0 | 919  | NA | NA   | 1 | 329  | C2 | NDUFB3 <sup>High</sup> |
| TCGA-BJ-A291 | 56 | FEMALE | WHITE | T1 | N0 | M0 | I   | NA | NA         | NA | NA  | No | NA              | 0 | 696  | 0 | 696  | NA | NA   | 0 | 696  | C2 | NDUFB3 <sup>High</sup> |
| TCGA-BJ-A2N7 | 30 | FEMALE | WHITE | T3 | N0 | M0 | I   | NA | NA         | NA | YES | No | Hormone Therapy | 0 | 559  | 0 | 559  | 0  | 559  | 0 | 559  | C2 | NDUFB3 <sup>High</sup> |
| TCGA-BJ-A2N8 | 30 | FEMALE | WHITE | T1 | N0 | M0 | I   | NA | NA         | NA | NA  | No | NA              | 0 | 504  | 0 | 504  | NA | NA   | 0 | 504  | C2 | NDUFB3 <sup>High</sup> |
| TCGA-BJ-A2N9 | 42 | FEMALE | WHITE | T2 | N0 | M0 | I   | NA | Metastasis | NA | NA  | No | NA              | 0 | 623  | 0 | 623  | NA | NA   | 1 | 225  | C2 | NDUFB3 <sup>High</sup> |
| TCGA-BJ-A2P4 | 29 | FEMALE | WHITE | T2 | N0 | M0 | I   | NA | NA         | NA | NA  | No | NA              | 0 | 390  | 0 | 390  | 0  | 390  | 0 | 390  | C2 | NDUFB3 <sup>High</sup> |
| TCGA-BJ-A3F0 | 64 | FEMALE | WHITE | T1 | N0 | M0 | I   | NA | NA         | NA | NA  | No | NA              | 0 | 424  | 0 | 424  | 0  | 424  | 0 | 424  | C2 | NDUFB3 <sup>High</sup> |
| TCGA-BJ-A3PR | 69 | FEMALE | WHITE | T1 | N0 | M0 | I   | NA | NA         | NA | NO  | No | NA              | 0 | 1107 | 0 | 1107 | 0  | 1107 | 0 | 1107 | C2 | NDUFB3 <sup>High</sup> |
| TCGA-BJ-A3PT | 51 | FEMALE | WHITE | T3 | N0 | M0 | III | NA | NA         | NA | YES | No | NA              | 0 | 709  | 0 | 709  | NA | NA   | 0 | 709  | C2 | NDUFB3 <sup>High</sup> |
| TCGA-BJ-A3PU | 52 | MALE   | WHITE | T3 | N1 | M0 | III | NA | Metastasis | NA | YES | No | NA              | 0 | 567  | 0 | 567  | 1  | 174  | 1 | 174  | C2 | NDUFB3 <sup>High</sup> |

|              |    |        |       |    |    |    |     |    |         |    |     |     |              |   |      |   |      |    |      |   |      |    |                        |
|--------------|----|--------|-------|----|----|----|-----|----|---------|----|-----|-----|--------------|---|------|---|------|----|------|---|------|----|------------------------|
| TCGA-BJ-A45D | 36 | MALE   | WHITE | T2 | N0 | M0 | I   | NA | NA      | NA | NO  | No  | NA           | 0 | 331  | 0 | 331  | NA | NA   | 0 | 331  | C2 | NDUFB3 <sup>High</sup> |
| TCGA-BJ-A45G | 48 | FEMALE | WHITE | T2 | N1 | M0 | III | NA | NA      | NA | YES | No  | NA           | 0 | 725  | 0 | 725  | NA | NA   | 0 | 725  | C2 | NDUFB3 <sup>High</sup> |
| TCGA-BJ-A45H | 45 | MALE   | WHITE | T3 | N0 | M0 | III | NA | NA      | NA | YES | No  | NA           | 0 | 865  | 0 | 865  | NA | NA   | 0 | 865  | C2 | NDUFB3 <sup>High</sup> |
| TCGA-BJ-A45J | 39 | FEMALE | WHITE | T1 | N1 | M0 | I   | NA | NA      | NA | YES | No  | NA           | 0 | 658  | 0 | 658  | NA | NA   | 0 | 658  | C2 | NDUFB3 <sup>High</sup> |
| TCGA-BJ-A45K | 33 | MALE   | WHITE | T2 | N0 | M0 | I   | NA | NA      | NA | NO  | No  | NA           | 0 | 705  | 0 | 705  | NA | NA   | 0 | 705  | C2 | NDUFB3 <sup>High</sup> |
| TCGA-CE-A13K | 30 | FEMALE | ASIAN | T3 | N1 | M0 | I   | NA | NA      | NA | NA  | No  | NA           | 0 | 385  | 0 | 385  | 0  | 385  | 0 | 385  | C2 | NDUFB3 <sup>High</sup> |
| TCGA-CE-A27D | 28 | FEMALE | ASIAN | T2 | N1 | M0 | I   | NA | NA      | NA | NA  | No  | NA           | 0 | 374  | 0 | 374  | 0  | 374  | 0 | 374  | C2 | NDUFB3 <sup>High</sup> |
| TCGA-CE-A3MD | 31 | MALE   | ASIAN | T2 | N1 | M0 | I   | NA | NA      | NA | NA  | No  | NA           | 0 | 389  | 0 | 389  | 0  | 389  | 0 | 389  | C2 | NDUFB3 <sup>High</sup> |
| TCGA-CE-A3ME | 51 | FEMALE | ASIAN | T2 | N0 | M0 | II  | NA | NA      | NA | NA  | No  | NA           | 0 | 379  | 0 | 379  | 0  | 379  | 0 | 379  | C2 | NDUFB3 <sup>High</sup> |
| TCGA-CE-A481 | 41 | FEMALE | ASIAN | T1 | N0 | M0 | I   | NA | NA      | NA | NA  | No  | Chemotherapy | 0 | 346  | 0 | 346  | 0  | 346  | 0 | 346  | C2 | NDUFB3 <sup>High</sup> |
| TCGA-CE-A482 | 27 | FEMALE | ASIAN | T1 | N1 | M0 | I   | NA | NA      | NA | NO  | No  | NA           | 0 | 325  | 0 | 325  | 0  | 325  | 0 | 325  | C2 | NDUFB3 <sup>High</sup> |
| TCGA-CE-A484 | 37 | FEMALE | ASIAN | T2 | N1 | M0 | I   | NA | NA      | NA | NO  | No  | NA           | 0 | 378  | 0 | 378  | 0  | 378  | 0 | 378  | C2 | NDUFB3 <sup>High</sup> |
| TCGA-DE-A20L | 44 | FEMALE | WHITE | T2 | NA | NA | I   | NA | NA      | NA | NA  | No  | NA           | 0 | 1145 | 0 | 1145 | 0  | 1145 | 0 | 1145 | C2 | NDUFB3 <sup>High</sup> |
| TCGA-DE-A3KN | 49 | FEMALE | WHITE | T3 | N1 | M0 | IV  | NA | NA      | NA | NA  | No  | NA           | 0 | 831  | 0 | 831  | NA | NA   | 0 | 831  | C2 | NDUFB3 <sup>High</sup> |
| TCGA-DE-A4M9 | 28 | MALE   | WHITE | T2 | NA | M0 | I   | NA | NA      | NA | YES | No  | NA           | 0 | 573  | 0 | 573  | NA | NA   | 0 | 573  | C2 | NDUFB3 <sup>High</sup> |
| TCGA-DE-A69J | 34 | FEMALE | BLACK | T2 | NA | M0 | I   | NA | NA      | NA | YES | No  | NA           | 0 | 447  | 0 | 447  | 0  | 447  | 0 | 447  | C2 | NDUFB3 <sup>High</sup> |
| TCGA-DE-A69K | 58 | FEMALE | BLACK | T3 | N0 | M0 | III | NA | Primary | NA | YES | No  | NA           | 0 | 434  | 0 | 434  | NA | NA   | 1 | 434  | C2 | NDUFB3 <sup>High</sup> |
| TCGA-DJ-A13L | 85 | MALE   | WHITE | T1 | N0 | M0 | I   | NA | NA      | NA | NO  | No  | NA           | 0 | 303  | 0 | 303  | 0  | 303  | 0 | 303  | C2 | NDUFB3 <sup>High</sup> |
| TCGA-DJ-A13M | 28 | FEMALE | WHITE | T1 | N0 | M0 | I   | NA | NA      | NA | NA  | No  | NA           | 0 | 1484 | 0 | 1484 | 0  | 1484 | 0 | 1484 | C2 | NDUFB3 <sup>High</sup> |
| TCGA-DJ-A13P | 52 | FEMALE | WHITE | T2 | N0 | M0 | II  | NA | NA      | NA | NA  | No  | NA           | 0 | 5150 | 0 | 5150 | 0  | 5150 | 0 | 5150 | C2 | NDUFB3 <sup>High</sup> |
| TCGA-DJ-A1QH | 58 | FEMALE | WHITE | T3 | N1 | M0 | III | NA | NA      | NA | NA  | Yes | NA           | 0 | 1293 | 0 | 1293 | NA | NA   | 0 | 1293 | C2 | NDUFB3 <sup>High</sup> |
| TCGA-DJ-A1QI | 63 | FEMALE | WHITE | T2 | N0 | M0 | II  | NA | NA      | NA | NA  | No  | NA           | 0 | 455  | 0 | 455  | 0  | 455  | 0 | 455  | C2 | NDUFB3 <sup>High</sup> |
| TCGA-DJ-A1QL | 70 | MALE   | NA    | T2 | N0 | M0 | II  | NA | NA      | NA | NA  | No  | NA           | 0 | 535  | 0 | 535  | 0  | 535  | 0 | 535  | C2 | NDUFB3 <sup>High</sup> |
| TCGA-DJ-A1QM | 42 | MALE   | WHITE | T1 | N0 | M0 | I   | NA | NA      | NA | NA  | No  | NA           | 0 | 183  | 0 | 183  | 0  | 183  | 0 | 183  | C2 | NDUFB3 <sup>High</sup> |
| TCGA-DJ-A1QN | 42 | FEMALE | NA    | T1 | N0 | M0 | I   | NA | NA      | NA | NA  | No  | NA           | 0 | 1295 | 0 | 1295 | 0  | 1295 | 0 | 1295 | C2 | NDUFB3 <sup>High</sup> |
| TCGA-DJ-A2PP | 47 | MALE   | NA    | T2 | N0 | M0 | II  | NA | NA      | NA | NA  | No  | NA           | 0 | 930  | 0 | 930  | 0  | 930  | 0 | 930  | C2 | NDUFB3 <sup>High</sup> |
| TCGA-DJ-A2PQ | 26 | MALE   | WHITE | T2 | N1 | M0 | I   | NA | NA      | NA | NA  | No  | NA           | 0 | 1077 | 0 | 1077 | 0  | 1077 | 0 | 1077 | C2 | NDUFB3 <sup>High</sup> |
| TCGA-DJ-A2PS | 40 | FEMALE | WHITE | T3 | N1 | M0 | I   | NA | NA      | NA | NA  | No  | NA           | 0 | 797  | 0 | 797  | 0  | 797  | 0 | 797  | C2 | NDUFB3 <sup>High</sup> |
| TCGA-DJ-A2PT | 70 | FEMALE | WHITE | T3 | N0 | M0 | III | NA | NA      | NA | NA  | No  | NA           | 0 | 1181 | 0 | 1181 | 0  | 1181 | 0 | 1181 | C2 | NDUFB3 <sup>High</sup> |
| TCGA-DJ-A2PX | 55 | FEMALE | WHITE | T1 | N0 | M0 | I   | NA | NA      | NA | NA  | No  | NA           | 0 | 881  | 0 | 881  | 0  | 881  | 0 | 881  | C2 | NDUFB3 <sup>High</sup> |
| TCGA-DJ-A2Q0 | 57 | FEMALE | WHITE | T2 | N0 | M0 | II  | NA | NA      | NA | NA  | No  | NA           | 0 | 1045 | 0 | 1045 | 0  | 1045 | 0 | 1045 | C2 | NDUFB3 <sup>High</sup> |
| TCGA-DJ-A2Q2 | 57 | FEMALE | WHITE | T3 | N0 | M0 | III | NA | NA      | NA | NA  | No  | NA           | 0 | 1337 | 0 | 1337 | 0  | 1337 | 0 | 1337 | C2 | NDUFB3 <sup>High</sup> |
| TCGA-DJ-A2Q7 | 52 | FEMALE | ASIAN | T2 | N1 | M0 | III | NA | NA      | NA | NA  | No  | NA           | 0 | 1068 | 0 | 1068 | 0  | 1068 | 0 | 1068 | C2 | NDUFB3 <sup>High</sup> |
| TCGA-DJ-A2Q9 | 65 | FEMALE | WHITE | T1 | N1 | M0 | III | NA | NA      | NA | NA  | No  | NA           | 0 | 1092 | 0 | 1092 | 0  | 1092 | 0 | 1092 | C2 | NDUFB3 <sup>High</sup> |
| TCGA-DJ-A2QA | 56 | FEMALE | ASIAN | T3 | N0 | M0 | III | NA | NA      | NA | NA  | No  | NA           | 0 | 1020 | 0 | 1020 | 0  | 1020 | 0 | 1020 | C2 | NDUFB3 <sup>High</sup> |
| TCGA-DJ-A2QB | 53 | FEMALE | ASIAN | T3 | N1 | M0 | IV  | NA | NA      | NA | NA  | No  | NA           | 0 | 1070 | 0 | 1070 | NA | NA   | 0 | 1070 | C2 | NDUFB3 <sup>High</sup> |
| TCGA-DJ-A2QC | 70 | FEMALE | NA    | T2 | N0 | M0 | II  | NA | NA      | NA | NA  | No  | NA           | 0 | 1215 | 0 | 1215 | 0  | 1215 | 0 | 1215 | C2 | NDUFB3 <sup>High</sup> |
| TCGA-DJ-A3UK | 35 | FEMALE | WHITE | T1 | N0 | M0 | I   | NA | NA      | NA | NO  | No  | NA           | 0 | 1123 | 0 | 1123 | 0  | 1123 | 0 | 1123 | C2 | NDUFB3 <sup>High</sup> |
| TCGA-DJ-A3UN | 51 | FEMALE | WHITE | T1 | N0 | M0 | I   | NA | NA      | NA | NO  | No  | NA           | 0 | 986  | 0 | 986  | 0  | 986  | 0 | 986  | C2 | NDUFB3 <sup>High</sup> |
| TCGA-DJ-A3UP | 38 | FEMALE | NA    | T2 | N0 | M0 | I   | NA | NA      | NA | YES | No  | NA           | 0 | 499  | 0 | 499  | 0  | 499  | 0 | 499  | C2 | NDUFB3 <sup>High</sup> |



|              |    |        |       |    |    |    |     |    |            |    |     |    |                 |   |      |    |      |    |      |   |      |    |                        |
|--------------|----|--------|-------|----|----|----|-----|----|------------|----|-----|----|-----------------|---|------|----|------|----|------|---|------|----|------------------------|
| TCGA-DJ-A3UR | 51 | FEMALE | WHITE | T3 | N1 | M0 | III | NA | NA         | NA | NO  | No | NA              | 0 | 1105 | 0  | 1105 | 0  | 1105 | 0 | 1105 | C2 | NDUFB3 <sup>High</sup> |
| TCGA-DJ-A3US | 37 | FEMALE | WHITE | T1 | N0 | M0 | I   | NA | NA         | NA | NO  | No | NA              | 0 | 998  | 0  | 998  | 0  | 998  | 0 | 998  | C2 | NDUFB3 <sup>High</sup> |
| TCGA-DJ-A3UT | 43 | FEMALE | WHITE | T1 | N0 | M0 | I   | NA | NA         | NA | NO  | No | NA              | 0 | 1105 | 0  | 1105 | 0  | 1105 | 0 | 1105 | C2 | NDUFB3 <sup>High</sup> |
| TCGA-DJ-A3UV | 18 | FEMALE | WHITE | T1 | N0 | M0 | I   | NA | NA         | NA | NO  | No | NA              | 0 | 1466 | 0  | 1466 | 0  | 1466 | 0 | 1466 | C2 | NDUFB3 <sup>High</sup> |
| TCGA-DJ-A3UX | 46 | FEMALE | WHITE | T1 | N0 | M0 | I   | NA | NA         | NA | NO  | No | NA              | 0 | 345  | 0  | 345  | 0  | 345  | 0 | 345  | C2 | NDUFB3 <sup>High</sup> |
| TCGA-DJ-A3UZ | 70 | FEMALE | WHITE | T3 | N0 | M0 | III | NA | NA         | NA | NO  | No | NA              | 0 | 1246 | 0  | 1246 | 0  | 1246 | 0 | 1246 | C2 | NDUFB3 <sup>High</sup> |
| TCGA-DJ-A3V2 | 44 | FEMALE | WHITE | T2 | N1 | M0 | I   | NA | NA         | NA | NO  | No | NA              | 0 | 615  | 0  | 615  | 0  | 615  | 0 | 615  | C2 | NDUFB3 <sup>High</sup> |
| TCGA-DJ-A3V3 | 57 | FEMALE | ASIAN | T2 | N0 | M0 | II  | NA | NA         | NA | NO  | No | NA              | 0 | 931  | 0  | 931  | 0  | 931  | 0 | 931  | C2 | NDUFB3 <sup>High</sup> |
| TCGA-DJ-A3V4 | 60 | FEMALE | WHITE | T3 | N1 | M0 | III | NA | NA         | NA | YES | No | NA              | 0 | 1294 | 0  | 1294 | 0  | 1294 | 0 | 1294 | C2 | NDUFB3 <sup>High</sup> |
| TCGA-DJ-A3V7 | 44 | FEMALE | WHITE | T3 | N0 | M0 | III | NA | NA         | NA | YES | No | NA              | 0 | 706  | 0  | 706  | 0  | 706  | 0 | 706  | C2 | NDUFB3 <sup>High</sup> |
| TCGA-DJ-A3V8 | 28 | FEMALE | WHITE | T3 | N1 | M0 | I   | NA | NA         | NA | YES | No | NA              | 0 | 647  | 0  | 647  | 0  | 647  | 0 | 647  | C2 | NDUFB3 <sup>High</sup> |
| TCGA-DJ-A3V9 | 50 | FEMALE | WHITE | T2 | N1 | M0 | IV  | NA | NA         | NA | YES | No | NA              | 0 | 623  | 0  | 623  | NA | NA   | 0 | 623  | C2 | NDUFB3 <sup>High</sup> |
| TCGA-DJ-A3VA | 39 | FEMALE | NA    | T1 | N1 | M0 | I   | NA | NA         | NA | NO  | No | NA              | 0 | 755  | 0  | 755  | 0  | 755  | 0 | 755  | C2 | NDUFB3 <sup>High</sup> |
| TCGA-DJ-A3VG | 40 | MALE   | WHITE | T1 | N0 | M0 | I   | NA | NA         | NA | NO  | No | NA              | 0 | 1085 | 0  | 1085 | 0  | 1085 | 0 | 1085 | C2 | NDUFB3 <sup>High</sup> |
| TCGA-DJ-A3VI | 52 | FEMALE | WHITE | T1 | N1 | M0 | III | NA | NA         | NA | NO  | No | NA              | 0 | 95   | 0  | 95   | 0  | 95   | 0 | 95   | C2 | NDUFB3 <sup>High</sup> |
| TCGA-DJ-A3VJ | 22 | MALE   | WHITE | T3 | N1 | M0 | I   | NA | NA         | NA | YES | No | NA              | 0 | 1108 | 0  | 1108 | 0  | 1108 | 0 | 1108 | C2 | NDUFB3 <sup>High</sup> |
| TCGA-DJ-A3VK | 63 | MALE   | WHITE | T3 | N0 | M0 | III | NA | NA         | NA | NO  | No | NA              | 0 | 753  | 0  | 753  | 0  | 753  | 0 | 753  | C2 | NDUFB3 <sup>High</sup> |
| TCGA-DJ-A3VL | 38 | MALE   | WHITE | T1 | N0 | M0 | I   | NA | Primary    | NA | NO  | No | NA              | 0 | 713  | 0  | 713  | 0  | 713  | 1 | 411  | C2 | NDUFB3 <sup>High</sup> |
| TCGA-DJ-A4UL | 68 | FEMALE | WHITE | T1 | N0 | M0 | I   | NA | NA         | NA | NO  | No | NA              | 0 | 939  | 0  | 939  | 0  | 939  | 0 | 939  | C2 | NDUFB3 <sup>High</sup> |
| TCGA-DJ-A4UP | 15 | FEMALE | WHITE | T1 | N1 | M0 | I   | NA | NA         | NA | YES | No | NA              | 0 | 916  | 0  | 916  | 0  | 916  | 0 | 916  | C2 | NDUFB3 <sup>High</sup> |
| TCGA-DJ-A4UW | 34 | FEMALE | ASIAN | T1 | N1 | M0 | I   | NA | NA         | NA | YES | No | NA              | 0 | 819  | 0  | 819  | NA | NA   | 0 | 819  | C2 | NDUFB3 <sup>High</sup> |
| TCGA-DJ-A4V0 | 36 | FEMALE | ASIAN | T2 | N0 | M0 | I   | NA | NA         | NA | NO  | No | NA              | 0 | 1081 | 0  | 1081 | 0  | 1081 | 0 | 1081 | C2 | NDUFB3 <sup>High</sup> |
| TCGA-DJ-A4V5 | 55 | MALE   | WHITE | T3 | N1 | M0 | IV  | NA | NA         | NA | YES | No | NA              | 0 | 1076 | 0  | 1076 | NA | NA   | 0 | 1076 | C2 | NDUFB3 <sup>High</sup> |
| TCGA-DO-A2HM | 49 | MALE   | WHITE | T1 | N1 | M0 | IV  | NA | NA         | NA | NA  | No | NA              | 0 | 71   | 0  | 71   | NA | NA   | 0 | 71   | C2 | NDUFB3 <sup>High</sup> |
| TCGA-E3-A3DY | 37 | MALE   | WHITE | T3 | N1 | M0 | I   | NA | NA         | NA | NA  | No | Hormone Therapy | 0 | 2815 | 0  | 2815 | 0  | 2815 | 0 | 2815 | C2 | NDUFB3 <sup>High</sup> |
| TCGA-E3-A3DZ | 55 | FEMALE | WHITE | T3 | N0 | M0 | III | NA | NA         | NA | NA  | No | Hormone Therapy | 0 | 1436 | 0  | 1436 | 0  | 1436 | 0 | 1436 | C2 | NDUFB3 <sup>High</sup> |
| TCGA-E3-A3E0 | 34 | FEMALE | WHITE | T2 | N0 | NA | I   | NA | NA         | NA | NA  | No | Hormone Therapy | 0 | 2019 | 0  | 2019 | 0  | 2019 | 0 | 2019 | C2 | NDUFB3 <sup>High</sup> |
| TCGA-E3-A3E1 | 46 | FEMALE | WHITE | T1 | N0 | M0 | I   | NA | NA         | NA | NA  | No | Hormone Therapy | 0 | 2449 | 0  | 2449 | 0  | 2449 | 0 | 2449 | C2 | NDUFB3 <sup>High</sup> |
| TCGA-E3-A3E2 | 34 | FEMALE | WHITE | T1 | N1 | NA | I   | NA | NA         | NA | NA  | No | Hormone Therapy | 0 | 1922 | 0  | 1922 | 0  | 1922 | 0 | 1922 | C2 | NDUFB3 <sup>High</sup> |
| TCGA-E3-A3E5 | 57 | MALE   | WHITE | T4 | N1 | NA | IV  | NA | NA         | NA | NA  | No | Hormone Therapy | 0 | 1215 | 0  | 1215 | NA | NA   | 0 | 1215 | C2 | NDUFB3 <sup>High</sup> |
| TCGA-E8-A2EA | 52 | FEMALE | WHITE | T1 | N0 | M0 | I   | NA | NA         | NA | NA  | No | NA              | 0 | 1085 | 0  | 1085 | 0  | 1085 | 0 | 1085 | C2 | NDUFB3 <sup>High</sup> |
| TCGA-E8-A415 | 39 | FEMALE | ASIAN | T1 | N1 | M0 | I   | NA | NA         | NA | NA  | No | NA              | 0 | 944  | 0  | 944  | 0  | 944  | 0 | 944  | C2 | NDUFB3 <sup>High</sup> |
| TCGA-E8-A416 | 51 | FEMALE | ASIAN | T1 | N0 | M0 | I   | NA | NA         | NA | NA  | No | NA              | 0 | 952  | 0  | 952  | 0  | 952  | 0 | 952  | C2 | NDUFB3 <sup>High</sup> |
| TCGA-E8-A418 | 75 | FEMALE | WHITE | T4 | N0 | M0 | IV  | NA | NA         | NA | NA  | No | NA              | 0 | 92   | 0  | 92   | NA | NA   | 0 | 92   | C2 | NDUFB3 <sup>High</sup> |
| TCGA-E8-A432 | 57 | FEMALE | ASIAN | T2 | N0 | M0 | II  | NA | Recurrence | NA | NA  | No | NA              | 0 | 931  | 0  | 931  | 1  | 720  | 1 | 720  | C2 | NDUFB3 <sup>High</sup> |
| TCGA-E8-A433 | 25 | FEMALE | ASIAN | T2 | N0 | M0 | I   | NA | NA         | NA | NO  | No | NA              | 0 | 951  | 0  | 951  | 0  | 951  | 0 | 951  | C2 | NDUFB3 <sup>High</sup> |
| TCGA-E8-A434 | 56 | FEMALE | ASIAN | T1 | N0 | M0 | I   | NA | NA         | NA | NA  | No | NA              | 0 | 953  | 0  | 953  | 0  | 953  | 0 | 953  | C2 | NDUFB3 <sup>High</sup> |
| TCGA-E8-A44M | 23 | FEMALE | ASIAN | T1 | N0 | M0 | I   | NA | NA         | NA | NO  | No | NA              | 0 | 917  | 0  | 917  | 0  | 917  | 0 | 917  | C2 | NDUFB3 <sup>High</sup> |
| TCGA-EL-A3CW | 87 | FEMALE | WHITE | T2 | N1 | M0 | III | NA | NA         | NA | NO  | No | NA              | 1 | 1734 | NA | 1734 | 0  | 1734 | 0 | 1734 | C2 | NDUFB3 <sup>High</sup> |
| TCGA-EL-A3CX | 22 | FEMALE | WHITE | T2 | N0 | M0 | I   | NA | NA         | NA | NO  | No | NA              | 0 | 3243 | 0  | 3243 | 0  | 3243 | 0 | 3243 | C2 | NDUFB3 <sup>High</sup> |

|              |    |        |       |    |    |    |     |    |            |    |     |     |    |   |      |   |      |    |      |   |      |    |                        |
|--------------|----|--------|-------|----|----|----|-----|----|------------|----|-----|-----|----|---|------|---|------|----|------|---|------|----|------------------------|
| TCGA-EL-A3CZ | 37 | FEMALE | WHITE | T1 | N1 | M0 | I   | NA | Recurrence | NA | YES | No  | NA | 0 | 2418 | 0 | 2418 | NA | NA   | 1 | 1426 | C2 | NDUFB3 <sup>High</sup> |
| TCGA-EL-A3D1 | 39 | MALE   | ASIAN | T2 | N0 | M0 | I   | NA | NA         | NA | YES | No  | NA | 0 | 2997 | 0 | 2997 | 0  | 2997 | 0 | 2997 | C2 | NDUFB3 <sup>High</sup> |
| TCGA-EL-A3D4 | 62 | MALE   | BLACK | T3 | N1 | M0 | IV  | NA | NA         | NA | YES | No  | NA | 0 | 2116 | 0 | 2116 | NA | NA   | 0 | 2116 | C2 | NDUFB3 <sup>High</sup> |
| TCGA-EL-A3D5 | 44 | FEMALE | WHITE | T3 | N1 | M0 | I   | NA | NA         | NA | YES | No  | NA | 0 | 1737 | 0 | 1737 | NA | NA   | 0 | 1737 | C2 | NDUFB3 <sup>High</sup> |
| TCGA-EL-A3GQ | 72 | FEMALE | WHITE | T1 | N0 | M0 | I   | NA | NA         | NA | NO  | No  | NA | 0 | 1528 | 0 | 1528 | 0  | 1528 | 0 | 1528 | C2 | NDUFB3 <sup>High</sup> |
| TCGA-EL-A3GR | 31 | FEMALE | WHITE | T3 | NA | M0 | I   | NA | NA         | NA | YES | No  | NA | 0 | 3501 | 0 | 3501 | 0  | 3501 | 0 | 3501 | C2 | NDUFB3 <sup>High</sup> |
| TCGA-EL-A3GS | 37 | FEMALE | WHITE | T3 | N1 | M0 | I   | NA | NA         | NA | YES | No  | NA | 0 | 1989 | 0 | 1989 | 0  | 1989 | 0 | 1989 | C2 | NDUFB3 <sup>High</sup> |
| TCGA-EL-A3GV | 65 | FEMALE | WHITE | T3 | N0 | M0 | III | NA | NA         | NA | YES | No  | NA | 0 | 1532 | 0 | 1532 | 0  | 1532 | 0 | 1532 | C2 | NDUFB3 <sup>High</sup> |
| TCGA-EL-A3GW | 37 | FEMALE | WHITE | T2 | N0 | M0 | I   | NA | NA         | NA | YES | No  | NA | 0 | 1527 | 0 | 1527 | 0  | 1527 | 0 | 1527 | C2 | NDUFB3 <sup>High</sup> |
| TCGA-EL-A3GX | 41 | FEMALE | WHITE | T2 | N1 | M0 | I   | NA | Recurrence | NA | YES | No  | NA | 0 | 4494 | 0 | 4494 | 1  | 439  | 1 | 439  | C2 | NDUFB3 <sup>High</sup> |
| TCGA-EL-A3GZ | 34 | FEMALE | WHITE | T1 | N0 | M0 | I   | NA | NA         | NA | YES | No  | NA | 0 | 4258 | 0 | 4258 | 0  | 4258 | 0 | 4258 | C2 | NDUFB3 <sup>High</sup> |
| TCGA-EL-A3H1 | 66 | FEMALE | BLACK | T1 | N0 | M0 | I   | NA | NA         | NA | YES | No  | NA | 1 | 1500 | 0 | 1500 | 0  | 1500 | 0 | 1500 | C2 | NDUFB3 <sup>High</sup> |
| TCGA-EL-A3H2 | 58 | MALE   | WHITE | T2 | N0 | NA | II  | NA | NA         | NA | YES | Yes | NA | 1 | 1019 | 1 | 1019 | NA | NA   | 1 | 1019 | C2 | NDUFB3 <sup>High</sup> |
| TCGA-EL-A3H3 | 19 | FEMALE | WHITE | T2 | N1 | M0 | I   | NA | NA         | NA | YES | No  | NA | 0 | 1319 | 0 | 1319 | 0  | 1319 | 0 | 1319 | C2 | NDUFB3 <sup>High</sup> |
| TCGA-EL-A3MW | 55 | FEMALE | WHITE | T2 | N0 | M0 | II  | NA | NA         | NA | YES | No  | NA | 0 | 3305 | 0 | 3305 | 0  | 3305 | 0 | 3305 | C2 | NDUFB3 <sup>High</sup> |
| TCGA-EL-A3T0 | 45 | FEMALE | WHITE | T3 | N1 | M0 | III | NA | NA         | NA | YES | No  | NA | 0 | 4335 | 0 | 4335 | 0  | 4335 | 0 | 4335 | C2 | NDUFB3 <sup>High</sup> |
| TCGA-EL-A3T6 | 34 | FEMALE | WHITE | T3 | N0 | M0 | I   | NA | NA         | NA | YES | No  | NA | 0 | 2988 | 0 | 2988 | 0  | 2988 | 0 | 2988 | C2 | NDUFB3 <sup>High</sup> |
| TCGA-EL-A3T8 | 36 | MALE   | ASIAN | T2 | N0 | M0 | I   | NA | NA         | NA | YES | No  | NA | 0 | 3269 | 0 | 3269 | 0  | 3269 | 0 | 3269 | C2 | NDUFB3 <sup>High</sup> |
| TCGA-EL-A3T9 | 69 | FEMALE | WHITE | T4 | N1 | NA | IV  | NA | NA         | NA | NA  | No  | NA | 1 | 174  | 1 | 174  | NA | NA   | 1 | 174  | C2 | NDUFB3 <sup>High</sup> |
| TCGA-EL-A3TA | 42 | MALE   | WHITE | T2 | N0 | M0 | I   | NA | NA         | NA | YES | No  | NA | 0 | 2035 | 0 | 2035 | 0  | 2035 | 0 | 2035 | C2 | NDUFB3 <sup>High</sup> |
| TCGA-EL-A3TB | 47 | FEMALE | WHITE | T3 | N1 | M0 | III | NA | NA         | NA | YES | No  | NA | 0 | 2519 | 0 | 2519 | 0  | 2519 | 0 | 2519 | C2 | NDUFB3 <sup>High</sup> |
| TCGA-EL-A3ZG | 15 | MALE   | ASIAN | T3 | N0 | M0 | I   | NA | NA         | NA | YES | No  | NA | 0 | 2724 | 0 | 2724 | 0  | 2724 | 0 | 2724 | C2 | NDUFB3 <sup>High</sup> |
| TCGA-EL-A3ZH | 42 | FEMALE | WHITE | T3 | N1 | M0 | I   | NA | NA         | NA | YES | No  | NA | 0 | 2773 | 0 | 2773 | 0  | 2773 | 0 | 2773 | C2 | NDUFB3 <sup>High</sup> |
| TCGA-EL-A3ZM | 60 | MALE   | NA    | T4 | N1 | M0 | IV  | NA | NA         | NA | YES | No  | NA | 0 | 1096 | 0 | 1096 | NA | NA   | 0 | 1096 | C2 | NDUFB3 <sup>High</sup> |
| TCGA-EL-A3ZN | 28 | FEMALE | WHITE | T3 | N1 | M0 | I   | NA | NA         | NA | NO  | No  | NA | 0 | 1614 | 0 | 1614 | 0  | 1614 | 0 | 1614 | C2 | NDUFB3 <sup>High</sup> |
| TCGA-EL-A3ZO | 79 | FEMALE | WHITE | T3 | N1 | M0 | III | NA | NA         | NA | YES | No  | NA | 0 | 2211 | 0 | 2211 | 0  | 2211 | 0 | 2211 | C2 | NDUFB3 <sup>High</sup> |
| TCGA-EL-A3ZQ | 78 | FEMALE | WHITE | T2 | N0 | M0 | II  | NA | NA         | NA | YES | No  | NA | 0 | 1862 | 0 | 1862 | 0  | 1862 | 0 | 1862 | C2 | NDUFB3 <sup>High</sup> |
| TCGA-EL-A3ZR | 46 | FEMALE | WHITE | T2 | N0 | M0 | II  | NA | NA         | NA | YES | No  | NA | 0 | 1830 | 0 | 1830 | 0  | 1830 | 0 | 1830 | C2 | NDUFB3 <sup>High</sup> |
| TCGA-EL-A3ZS | 22 | FEMALE | WHITE | T1 | N1 | M0 | I   | NA | NA         | NA | YES | No  | NA | 0 | 215  | 0 | 215  | 0  | 215  | 0 | 215  | C2 | NDUFB3 <sup>High</sup> |
| TCGA-EL-A4JV | 41 | FEMALE | ASIAN | T2 | N0 | M0 | I   | NA | NA         | NA | YES | No  | NA | 0 | 1748 | 0 | 1748 | 0  | 1748 | 0 | 1748 | C2 | NDUFB3 <sup>High</sup> |
| TCGA-EL-A4K2 | 43 | FEMALE | WHITE | T1 | N0 | M0 | I   | NA | NA         | NA | NO  | No  | NA | 0 | 928  | 0 | 928  | 0  | 928  | 0 | 928  | C2 | NDUFB3 <sup>High</sup> |
| TCGA-EL-A4K7 | 74 | MALE   | WHITE | T2 | N1 | M0 | III | NA | NA         | NA | NO  | No  | NA | 0 | 1251 | 0 | 1251 | 0  | 1251 | 0 | 1251 | C2 | NDUFB3 <sup>High</sup> |
| TCGA-EL-A4KH | 36 | FEMALE | WHITE | T2 | N0 | M0 | I   | NA | NA         | NA | YES | No  | NA | 0 | 823  | 0 | 823  | 0  | 823  | 0 | 823  | C2 | NDUFB3 <sup>High</sup> |
| TCGA-EL-A4KI | 63 | MALE   | WHITE | T3 | N0 | NA | III | NA | Metastasis | NA | YES | No  | NA | 0 | 727  | 0 | 727  | 1  | 265  | 1 | 265  | C2 | NDUFB3 <sup>High</sup> |
| TCGA-EM-A1CW | 39 | FEMALE | NA    | T3 | N0 | NA | I   | NA | NA         | NA | NA  | No  | NA | 0 | 549  | 0 | 549  | 0  | 549  | 0 | 549  | C2 | NDUFB3 <sup>High</sup> |
| TCGA-EM-A1YA | 74 | FEMALE | NA    | T2 | NA | NA | II  | NA | NA         | NA | NA  | No  | NA | 0 | 602  | 0 | 602  | 0  | 602  | 0 | 602  | C2 | NDUFB3 <sup>High</sup> |
| TCGA-EM-A1YB | 73 | FEMALE | NA    | T2 | NA | NA | II  | NA | NA         | NA | NA  | No  | NA | 0 | 592  | 0 | 592  | 0  | 592  | 0 | 592  | C2 | NDUFB3 <sup>High</sup> |
| TCGA-EM-A1YD | 53 | FEMALE | NA    | T2 | N0 | NA | II  | NA | NA         | NA | NA  | No  | NA | 0 | 1734 | 0 | 1734 | 0  | 1734 | 0 | 1734 | C2 | NDUFB3 <sup>High</sup> |
| TCGA-EM-A1YE | 47 | FEMALE | NA    | T2 | N0 | NA | II  | NA | NA         | NA | NA  | No  | NA | 0 | 1645 | 0 | 1645 | 0  | 1645 | 0 | 1645 | C2 | NDUFB3 <sup>High</sup> |
| TCGA-EM-A22J | 56 | FEMALE | NA    | T2 | N0 | NA | II  | NA | NA         | NA | NA  | No  | NA | 0 | 441  | 0 | 441  | NA | NA   | 0 | 441  | C2 | NDUFB3 <sup>High</sup> |

|               |    |        |       |    |    |    |     |    |         |    |     |    |    |   |      |   |      |    |      |   |      |    |                        |
|---------------|----|--------|-------|----|----|----|-----|----|---------|----|-----|----|----|---|------|---|------|----|------|---|------|----|------------------------|
| TCGA-EM-A22K  | 46 | FEMALE | NA    | T1 | N1 | NA | IV  | NA | NA      | NA | NA  | No | NA | 0 | 479  | 0 | 479  | NA | NA   | 0 | 479  | C2 | NDUFB3 <sup>High</sup> |
| TCGA-EM-A22L  | 33 | FEMALE | NA    | T2 | N0 | NA | I   | NA | NA      | NA | NA  | No | NA | 0 | 318  | 0 | 318  | 0  | 318  | 0 | 318  | C2 | NDUFB3 <sup>High</sup> |
| TCGA-EM-A2CJ  | 49 | FEMALE | NA    | T1 | NA | NA | I   | NA | NA      | NA | NA  | No | NA | 0 | 1447 | 0 | 1447 | 0  | 1447 | 0 | 1447 | C2 | NDUFB3 <sup>High</sup> |
| TCGA-EM-A2CK  | 28 | MALE   | NA    | T2 | N1 | NA | I   | NA | NA      | NA | NA  | No | NA | 0 | 544  | 0 | 544  | 0  | 544  | 0 | 544  | C2 | NDUFB3 <sup>High</sup> |
| TCGA-EM-A2CL  | 31 | MALE   | NA    | T2 | NA | NA | I   | NA | NA      | NA | NA  | No | NA | 0 | 401  | 0 | 401  | 0  | 401  | 0 | 401  | C2 | NDUFB3 <sup>High</sup> |
| TCGA-EM-A2CP  | 26 | FEMALE | NA    | T2 | N0 | NA | I   | NA | NA      | NA | NA  | No | NA | 0 | 91   | 0 | 91   | 0  | 91   | 0 | 91   | C2 | NDUFB3 <sup>High</sup> |
| TCGA-EM-A2CQ  | 40 | FEMALE | NA    | T1 | N1 | NA | I   | NA | NA      | NA | NA  | No | NA | 0 | 374  | 0 | 374  | 0  | 374  | 0 | 374  | C2 | NDUFB3 <sup>High</sup> |
| TCGA-EM-A2CT  | 20 | FEMALE | NA    | T1 | N0 | NA | I   | NA | NA      | NA | NA  | No | NA | 0 | 1474 | 0 | 1474 | 0  | 1474 | 0 | 1474 | C2 | NDUFB3 <sup>High</sup> |
| TCGA-EM-A2CU  | 47 | FEMALE | NA    | T2 | N1 | NA | III | NA | NA      | NA | NA  | No | NA | 0 | 400  | 0 | 400  | 0  | 400  | 0 | 400  | C2 | NDUFB3 <sup>High</sup> |
| TCGA-EM-A2OV  | 64 | FEMALE | ASIAN | T2 | N0 | NA | II  | NA | NA      | NA | NA  | No | NA | 0 | 674  | 0 | 674  | 0  | 674  | 0 | 674  | C2 | NDUFB3 <sup>High</sup> |
| TCGA-EM-A2OW  | 37 | FEMALE | NA    | T1 | NA | NA | I   | NA | NA      | NA | NA  | No | NA | 0 | 1227 | 0 | 1227 | 0  | 1227 | 0 | 1227 | C2 | NDUFB3 <sup>High</sup> |
| TCGA-EM-A2OX  | 46 | MALE   | NA    | T1 | N1 | NA | IV  | NA | NA      | NA | NA  | No | NA | 0 | 600  | 0 | 600  | NA | NA   | 0 | 600  | C2 | NDUFB3 <sup>High</sup> |
| TCGA-EM-A2OZ  | 66 | MALE   | NA    | T1 | N0 | NA | I   | NA | NA      | NA | NA  | No | NA | 0 | 1033 | 0 | 1033 | 0  | 1033 | 0 | 1033 | C2 | NDUFB3 <sup>High</sup> |
| TCGA-EM-A2P0  | 33 | MALE   | NA    | T2 | N1 | NA | I   | NA | NA      | NA | NA  | No | NA | 0 | 535  | 0 | 535  | 0  | 535  | 0 | 535  | C2 | NDUFB3 <sup>High</sup> |
| TCGA-EM-A2P2  | 46 | MALE   | NA    | T3 | N0 | NA | III | NA | NA      | NA | NA  | No | NA | 0 | 526  | 0 | 526  | 0  | 526  | 0 | 526  | C2 | NDUFB3 <sup>High</sup> |
| TCGA-EM-A2P3  | 47 | FEMALE | NA    | T1 | NA | NA | I   | NA | NA      | NA | NA  | No | NA | 0 | 444  | 0 | 444  | 0  | 444  | 0 | 444  | C2 | NDUFB3 <sup>High</sup> |
| TCGA-EM-A3AI  | 67 | FEMALE | WHITE | T2 | NA | NA | II  | NA | NA      | NA | NA  | No | NA | 0 | 685  | 0 | 685  | 0  | 685  | 0 | 685  | C2 | NDUFB3 <sup>High</sup> |
| TCGA-EM-A3AJ  | 39 | MALE   | NA    | T3 | N1 | NA | I   | NA | NA      | NA | NA  | No | NA | 0 | 941  | 0 | 941  | NA | NA   | 0 | 941  | C2 | NDUFB3 <sup>High</sup> |
| TCGA-EM-A3AK  | 62 | FEMALE | NA    | T1 | N0 | NA | I   | NA | NA      | NA | NA  | No | NA | 0 | 477  | 0 | 477  | 0  | 477  | 0 | 477  | C2 | NDUFB3 <sup>High</sup> |
| TCGA-EM-A3AL  | 45 | FEMALE | NA    | T1 | N0 | NA | I   | NA | NA      | NA | NA  | No | NA | 0 | 430  | 0 | 430  | 0  | 430  | 0 | 430  | C2 | NDUFB3 <sup>High</sup> |
| TCGA-EM-A3AN  | 36 | FEMALE | NA    | T1 | N1 | NA | I   | NA | NA      | NA | NA  | No | NA | 0 | 1006 | 0 | 1006 | NA | NA   | 0 | 1006 | C2 | NDUFB3 <sup>High</sup> |
| TCGA-EM-A3AP  | 31 | FEMALE | NA    | T2 | NA | NA | I   | NA | NA      | NA | NA  | No | NA | 0 | 254  | 0 | 254  | 0  | 254  | 0 | 254  | C2 | NDUFB3 <sup>High</sup> |
| TCGA-EM-A3AQ  | 85 | FEMALE | NA    | T1 | N0 | NA | I   | NA | NA      | NA | NA  | No | NA | 0 | 904  | 0 | 904  | 0  | 904  | 0 | 904  | C2 | NDUFB3 <sup>High</sup> |
| TCGA-EM-A3AR  | 41 | MALE   | NA    | T1 | N1 | NA | I   | NA | NA      | NA | NA  | No | NA | 0 | 1133 | 0 | 1133 | 0  | 1133 | 0 | 1133 | C2 | NDUFB3 <sup>High</sup> |
| TCGA-EM-A3FJ  | 24 | FEMALE | NA    | T1 | N1 | NA | I   | NA | NA      | NA | NA  | No | NA | 0 | 850  | 0 | 850  | 0  | 850  | 0 | 850  | C2 | NDUFB3 <sup>High</sup> |
| TCGA-EM-A3FK  | 30 | FEMALE | NA    | T1 | N1 | NA | I   | NA | NA      | NA | NA  | No | NA | 0 | 723  | 0 | 723  | 0  | 723  | 0 | 723  | C2 | NDUFB3 <sup>High</sup> |
| TCGA-EM-A3FL  | 63 | FEMALE | NA    | T1 | NA | NA | I   | NA | NA      | NA | NA  | No | NA | 0 | 1441 | 0 | 1441 | 0  | 1441 | 0 | 1441 | C2 | NDUFB3 <sup>High</sup> |
| TCGA-EM-A3FN  | 42 | FEMALE | NA    | T3 | N0 | NA | I   | NA | NA      | NA | NA  | No | NA | 0 | 367  | 0 | 367  | 0  | 367  | 0 | 367  | C2 | NDUFB3 <sup>High</sup> |
| TCGA-EM-A3FP  | 71 | FEMALE | NA    | T2 | N0 | NA | II  | NA | NA      | NA | NA  | No | NA | 0 | 529  | 0 | 529  | 0  | 529  | 0 | 529  | C2 | NDUFB3 <sup>High</sup> |
| TCGA-EM-A3FQ1 | 19 | FEMALE | NA    | T3 | N1 | NA | I   | NA | NA      | NA | NA  | No | NA | 0 | 492  | 0 | 492  | 0  | 492  | 0 | 492  | C2 | NDUFB3 <sup>High</sup> |
| TCGA-EM-A3FR  | 55 | FEMALE | NA    | T2 | N1 | NA | III | NA | NA      | NA | NA  | No | NA | 0 | 457  | 0 | 457  | 0  | 457  | 0 | 457  | C2 | NDUFB3 <sup>High</sup> |
| TCGA-EM-A3O3  | 83 | FEMALE | NA    | T2 | N1 | NA | III | NA | NA      | NA | YES | No | NA | 0 | 441  | 0 | 441  | 0  | 441  | 0 | 441  | C2 | NDUFB3 <sup>High</sup> |
| TCGA-EM-A3O6  | 54 | FEMALE | NA    | T2 | NA | NA | II  | NA | NA      | NA | YES | No | NA | 0 | 458  | 0 | 458  | 0  | 458  | 0 | 458  | C2 | NDUFB3 <sup>High</sup> |
| TCGA-EM-A3O7  | 46 | FEMALE | NA    | T3 | NA | NA | III | NA | NA      | NA | YES | No | NA | 0 | 223  | 0 | 223  | 0  | 223  | 0 | 223  | C2 | NDUFB3 <sup>High</sup> |
| TCGA-EM-A3O8  | 33 | FEMALE | NA    | T1 | N0 | NA | I   | NA | NA      | NA | NO  | No | NA | 0 | 381  | 0 | 381  | 0  | 381  | 0 | 381  | C2 | NDUFB3 <sup>High</sup> |
| TCGA-EM-A3OA  | 55 | FEMALE | NA    | T2 | N0 | NA | II  | NA | NA      | NA | NO  | No | NA | 0 | 822  | 0 | 822  | 0  | 822  | 0 | 822  | C2 | NDUFB3 <sup>High</sup> |
| TCGA-EM-A3OB  | 33 | FEMALE | NA    | T2 | N0 | NA | I   | NA | NA      | NA | NO  | No | NA | 0 | 1176 | 0 | 1176 | 0  | 1176 | 0 | 1176 | C2 | NDUFB3 <sup>High</sup> |
| TCGA-EM-A3ST  | 62 | FEMALE | NA    | T3 | N0 | NA | III | NA | Primary | NA | YES | No | NA | 0 | 1182 | 0 | 1182 | 1  | 966  | 1 | 966  | C2 | NDUFB3 <sup>High</sup> |
| TCGA-EM-A3SU1 | 43 | FEMALE | NA    | T2 | N1 | NA | I   | NA | NA      | NA | YES | No | NA | 0 | 911  | 0 | 911  | 0  | 911  | 0 | 911  | C2 | NDUFB3 <sup>High</sup> |
| TCGA-EM-A3SX  | 28 | FEMALE | NA    | T3 | N1 | NA | I   | NA | NA      | NA | NO  | No | NA | 0 | 908  | 0 | 908  | NA | NA   | 0 | 908  | C2 | NDUFB3 <sup>High</sup> |

|              |    |        |       |    |    |    |     |    |            |    |     |    |                 |   |      |   |      |    |      |   |      |    |                        |
|--------------|----|--------|-------|----|----|----|-----|----|------------|----|-----|----|-----------------|---|------|---|------|----|------|---|------|----|------------------------|
| TCGA-EM-A3SY | 36 | MALE   | NA    | T1 | NA | NA | I   | NA | NA         | NA | NO  | No | NA              | 0 | 411  | 0 | 411  | 0  | 411  | 0 | 411  | C2 | NDUFB3 <sup>High</sup> |
| TCGA-EM-A3SZ | 42 | FEMALE | NA    | T2 | N0 | NA | I   | NA | NA         | NA | NO  | No | NA              | 0 | 389  | 0 | 389  | 0  | 389  | 0 | 389  | C2 | NDUFB3 <sup>High</sup> |
| TCGA-EM-A4FH | 69 | MALE   | NA    | T3 | NA | NA | III | NA | NA         | NA | YES | No | NA              | 0 | 892  | 0 | 892  | 0  | 892  | 0 | 892  | C2 | NDUFB3 <sup>High</sup> |
| TCGA-EM-A4FK | 33 | FEMALE | NA    | T2 | NA | NA | I   | NA | NA         | NA | NO  | No | NA              | 0 | 649  | 0 | 649  | 0  | 649  | 0 | 649  | C2 | NDUFB3 <sup>High</sup> |
| TCGA-EM-A4FV | 64 | FEMALE | NA    | T1 | N0 | NA | I   | NA | NA         | NA | NO  | No | NA              | 0 | 744  | 0 | 744  | 0  | 744  | 0 | 744  | C2 | NDUFB3 <sup>High</sup> |
| TCGA-EM-A4G1 | 26 | FEMALE | NA    | T1 | N0 | NA | I   | NA | NA         | NA | NO  | No | NA              | 0 | 416  | 0 | 416  | 0  | 416  | 0 | 416  | C2 | NDUFB3 <sup>High</sup> |
| TCGA-ET-A25I | 37 | FEMALE | WHITE | T2 | N0 | NA | I   | NA | NA         | NA | NA  | No | NA              | 0 | 2485 | 0 | 2485 | 0  | 2485 | 0 | 2485 | C2 | NDUFB3 <sup>High</sup> |
| TCGA-ET-A25P | 24 | FEMALE | ASIAN | T1 | N0 | NA | I   | NA | NA         | NA | NA  | No | NA              | 0 | 559  | 0 | 559  | 0  | 559  | 0 | 559  | C2 | NDUFB3 <sup>High</sup> |
| TCGA-ET-A2MZ | 39 | MALE   | WHITE | T1 | N0 | NA | I   | NA | NA         | NA | NA  | No | NA              | 0 | 1133 | 0 | 1133 | NA | NA   | 0 | 1133 | C2 | NDUFB3 <sup>High</sup> |
| TCGA-ET-A2N0 | 51 | FEMALE | WHITE | T1 | N1 | NA | III | NA | NA         | NA | NA  | No | NA              | 0 | 1600 | 0 | 1600 | 0  | 1600 | 0 | 1600 | C2 | NDUFB3 <sup>High</sup> |
| TCGA-ET-A2N3 | 34 | FEMALE | WHITE | T2 | NA | NA | I   | NA | NA         | NA | YES | No | NA              | 0 | 2535 | 0 | 2535 | NA | NA   | 0 | 2535 | C2 | NDUFB3 <sup>High</sup> |
| TCGA-ET-A2N5 | 46 | FEMALE | BLACK | T3 | NA | NA | III | NA | NA         | NA | NA  | No | NA              | 0 | 2460 | 0 | 2460 | NA | NA   | 0 | 2460 | C2 | NDUFB3 <sup>High</sup> |
| TCGA-ET-A39I | 83 | FEMALE | WHITE | T1 | NA | NA | I   | NA | NA         | NA | NA  | No | NA              | 1 | 1011 | 0 | 1011 | 0  | 1011 | 0 | 1011 | C2 | NDUFB3 <sup>High</sup> |
| TCGA-ET-A39L | 20 | FEMALE | NA    | T3 | N0 | NA | I   | NA | NA         | NA | NA  | No | NA              | 0 | 3299 | 0 | 3299 | 0  | 3299 | 0 | 3299 | C2 | NDUFB3 <sup>High</sup> |
| TCGA-ET-A39P | 73 | FEMALE | BLACK | T3 | N0 | NA | III | NA | NA         | NA | NA  | No | NA              | 0 | 2900 | 0 | 2900 | NA | NA   | 0 | 2900 | C2 | NDUFB3 <sup>High</sup> |
| TCGA-ET-A39R | 24 | FEMALE | WHITE | T1 | N0 | NA | I   | NA | NA         | NA | NA  | No | NA              | 0 | 2863 | 0 | 2863 | 0  | 2863 | 0 | 2863 | C2 | NDUFB3 <sup>High</sup> |
| TCGA-ET-A39S | 27 | FEMALE | WHITE | T1 | N0 | NA | I   | NA | NA         | NA | NA  | No | NA              | 0 | 1676 | 0 | 1676 | 0  | 1676 | 0 | 1676 | C2 | NDUFB3 <sup>High</sup> |
| TCGA-ET-A39T | 55 | FEMALE | WHITE | T3 | N0 | NA | III | NA | NA         | NA | NA  | No | NA              | 0 | 2987 | 0 | 2987 | 0  | 2987 | 0 | 2987 | C2 | NDUFB3 <sup>High</sup> |
| TCGA-ET-A3BS | 42 | MALE   | ASIAN | T3 | N1 | NA | I   | NA | NA         | NA | NA  | No | NA              | 0 | 176  | 0 | 176  | 0  | 176  | 0 | 176  | C2 | NDUFB3 <sup>High</sup> |
| TCGA-ET-A3DS | 33 | FEMALE | WHITE | T1 | N0 | NA | I   | NA | NA         | NA | NA  | No | NA              | 0 | 2033 | 0 | 2033 | 0  | 2033 | 0 | 2033 | C2 | NDUFB3 <sup>High</sup> |
| TCGA-ET-A3DV | 68 | FEMALE | WHITE | T3 | N0 | NA | II  | NA | NA         | NA | NA  | No | NA              | 0 | 5068 | 0 | 5068 | 0  | 5068 | 0 | 5068 | C2 | NDUFB3 <sup>High</sup> |
| TCGA-ET-A40P | 32 | FEMALE | WHITE | T2 | N0 | NA | I   | NA | NA         | NA | YES | No | NA              | 0 | 1338 | 0 | 1338 | 0  | 1338 | 0 | 1338 | C2 | NDUFB3 <sup>High</sup> |
| TCGA-ET-A40R | 24 | FEMALE | WHITE | T2 | N1 | NA | I   | NA | NA         | NA | YES | No | NA              | 0 | 1350 | 0 | 1350 | NA | NA   | 0 | 1350 | C2 | NDUFB3 <sup>High</sup> |
| TCGA-ET-A40S | 62 | MALE   | WHITE | T2 | N0 | NA | II  | NA | NA         | NA | YES | No | NA              | 0 | 1223 | 0 | 1223 | NA | NA   | 0 | 1223 | C2 | NDUFB3 <sup>High</sup> |
| TCGA-ET-A40T | 26 | FEMALE | WHITE | T2 | N1 | NA | I   | NA | NA         | NA | NA  | No | NA              | 0 | 1140 | 0 | 1140 | NA | NA   | 0 | 1140 | C2 | NDUFB3 <sup>High</sup> |
| TCGA-ET-A4KQ | 45 | FEMALE | WHITE | T2 | NA | NA | II  | NA | NA         | NA | NO  | No | NA              | 0 | 955  | 0 | 955  | 0  | 955  | 0 | 955  | C2 | NDUFB3 <sup>High</sup> |
| TCGA-FE-A231 | 70 | MALE   | WHITE | T3 | N1 | NA | IV  | NA | NA         | NA | NA  | No | NA              | 0 | 961  | 0 | 961  | NA | NA   | 0 | 961  | C2 | NDUFB3 <sup>High</sup> |
| TCGA-FE-A232 | 44 | FEMALE | WHITE | T3 | NA | NA | I   | NA | NA         | NA | NA  | No | NA              | 0 | 2424 | 0 | 2424 | 0  | 2424 | 0 | 2424 | C2 | NDUFB3 <sup>High</sup> |
| TCGA-FE-A235 | 26 | FEMALE | WHITE | T2 | N1 | NA | I   | NA | NA         | NA | NA  | No | NA              | 0 | 3571 | 0 | 3571 | 0  | 3571 | 0 | 3571 | C2 | NDUFB3 <sup>High</sup> |
| TCGA-FE-A239 | 82 | MALE   | WHITE | T3 | N0 | NA | III | NA | Recurrence | NA | NA  | No | NA              | 1 | 1023 | 1 | 1023 | 1  | 933  | 1 | 933  | C2 | NDUFB3 <sup>High</sup> |
| TCGA-FE-A3PD | 17 | FEMALE | WHITE | T2 | N0 | NA | I   | NA | NA         | NA | NA  | No | NA              | 0 | 2396 | 0 | 2396 | 0  | 2396 | 0 | 2396 | C2 | NDUFB3 <sup>High</sup> |
| TCGA-FK-A3S3 | 43 | FEMALE | BLACK | T3 | N1 | NA | I   | NA | NA         | NA | YES | No | NA              | 0 | 2162 | 0 | 2162 | 0  | 2162 | 0 | 2162 | C2 | NDUFB3 <sup>High</sup> |
| TCGA-FK-A3SB | 28 | FEMALE | ASIAN | T3 | N1 | NA | I   | NA | NA         | NA | YES | No | NA              | 0 | 125  | 0 | 125  | 0  | 125  | 0 | 125  | C2 | NDUFB3 <sup>High</sup> |
| TCGA-FK-A3SD | 61 | FEMALE | WHITE | T1 | N0 | M0 | I   | NA | NA         | NA | NO  | No | NA              | 0 | 32   | 0 | 32   | 0  | 32   | 0 | 32   | C2 | NDUFB3 <sup>High</sup> |
| TCGA-FK-A3SE | 31 | FEMALE | ASIAN | T2 | N1 | NA | I   | NA | NA         | NA | YES | No | NA              | 0 | 670  | 0 | 670  | 0  | 670  | 0 | 670  | C2 | NDUFB3 <sup>High</sup> |
| TCGA-FK-A3SG | 21 | FEMALE | WHITE | T2 | N1 | NA | I   | NA | NA         | NA | NA  | No | NA              | 0 | 28   | 0 | 28   | 0  | 28   | 0 | 28   | C2 | NDUFB3 <sup>High</sup> |
| TCGA-FY-A2QD | 61 | FEMALE | BLACK | T1 | N0 | NA |     | NA | NA         | NA | NA  | No | NA              | 0 | 38   | 0 | 38   | NA | NA   | 0 | 38   | C2 | NDUFB3 <sup>High</sup> |
| TCGA-FY-A3NM | 48 | FEMALE | WHITE | T3 | N0 | NA | III | NA | NA         | NA | NA  | No | NA              | 0 | 885  | 0 | 885  | 0  | 885  | 0 | 885  | C2 | NDUFB3 <sup>High</sup> |
| TCGA-FY-A3NP | 69 | MALE   | WHITE | T1 | N0 | M0 | I   | NA | NA         | NA | NA  | No | NA              | 0 | 491  | 0 | 491  | 0  | 491  | 0 | 491  | C2 | NDUFB3 <sup>High</sup> |
| TCGA-FY-A3ON | 20 | MALE   | WHITE | T2 | N1 | NA | I   | NA | NA         | NA | NA  | No | Hormone Therapy | 0 | 595  | 0 | 595  | 0  | 595  | 0 | 595  | C2 | NDUFB3 <sup>High</sup> |

|                |    |        |       |    |    |    |     |    |    |    |     |    |                 |   |      |   |      |    |      |   |      |    |                        |
|----------------|----|--------|-------|----|----|----|-----|----|----|----|-----|----|-----------------|---|------|---|------|----|------|---|------|----|------------------------|
| TCGA-FY-A3R6   | 57 | FEMALE | WHITE | T2 | N1 | NA | IV  | NA | NA | NA | NA  | No | NA              | 0 | 423  | 0 | 423  | NA | NA   | 0 | 423  | C2 | NDUFB3 <sup>High</sup> |
| TCGA-FY-A3R7   | 50 | FEMALE | WHITE | T3 | N1 | NA | III | NA | NA | NA | NA  | No | NA              | 0 | 495  | 0 | 495  | NA | NA   | 0 | 495  | C2 | NDUFB3 <sup>High</sup> |
| TCGA-FY-A3R8   | 62 | FEMALE | WHITE | T3 | NA | NA | III | NA | NA | NA | YES | No | Hormone Therapy | 0 | 477  | 0 | 477  | 0  | 477  | 0 | 477  | C2 | NDUFB3 <sup>High</sup> |
| TCGA-FY-A3R9   | 66 | FEMALE | WHITE | T1 | N0 | NA | I   | NA | NA | NA | NA  | No | Hormone Therapy | 0 | 504  | 0 | 504  | 0  | 504  | 0 | 504  | C2 | NDUFB3 <sup>High</sup> |
| TCGA-FY-A3RA   | 21 | FEMALE | WHITE | T2 | NA | NA | I   | NA | NA | NA | YES | No | NA              | 0 | 550  | 0 | 550  | 0  | 550  | 0 | 550  | C2 | NDUFB3 <sup>High</sup> |
| TCGA-FY-A3TY   | 61 | FEMALE | WHITE | T3 | N0 | NA | III | NA | NA | NA | NA  | No | NA              | 0 | 709  | 0 | 709  | 0  | 709  | 0 | 709  | C2 | NDUFB3 <sup>High</sup> |
| TCGA-FY-A3W9   | 66 | FEMALE | WHITE | T2 | N0 | NA | II  | NA | NA | NA | NA  | No | Hormone Therapy | 0 | 658  | 0 | 658  | NA | NA   | 0 | 658  | C2 | NDUFB3 <sup>High</sup> |
| TCGA-FY-A3WA   | 52 | FEMALE | WHITE | T1 | NA | NA | I   | NA | NA | NA | NA  | No | NA              | 0 | 519  | 0 | 519  | 0  | 519  | 0 | 519  | C2 | NDUFB3 <sup>High</sup> |
| TCGA-FY-A40N   | 55 | FEMALE | WHITE | T1 | N0 | NA | I   | NA | NA | NA | NA  | No | Hormone Therapy | 0 | 579  | 0 | 579  | 0  | 579  | 0 | 579  | C2 | NDUFB3 <sup>High</sup> |
| TCGA-FY-A4B0   | 76 | MALE   | WHITE | T1 | NA | NA | I   | NA | NA | NA | NA  | No | Hormone Therapy | 0 | 420  | 0 | 420  | NA | NA   | 0 | 420  | C2 | NDUFB3 <sup>High</sup> |
| TCGA-FY-A76V   | 54 | MALE   | BLACK | T2 | NA | NA | II  | NA | NA | NA | NA  | No | NA              | 0 | 51   | 0 | 51   | 0  | 51   | 0 | 51   | C2 | NDUFB3 <sup>High</sup> |
| TCGA-H2-A2K9   | 25 | MALE   | WHITE | T2 | N1 | NA | I   | NA | NA | NA | NA  | No | NA              | 0 | 659  | 0 | 659  | NA | NA   | 0 | 659  | C2 | NDUFB3 <sup>High</sup> |
| TCGA-H2-A3RH   | 41 | FEMALE | WHITE | T1 | N0 | M0 | I   | NA | NA | NA | NA  | No | NA              | 0 | 379  | 0 | 379  | NA | NA   | 0 | 379  | C2 | NDUFB3 <sup>High</sup> |
| TCGA-IM-A3EB   | 32 | FEMALE | WHITE | T3 | N1 | NA | I   | NA | NA | NA | NA  | No | NA              | 0 | 1488 | 0 | 1488 | 0  | 1488 | 0 | 1488 | C2 | NDUFB3 <sup>High</sup> |
| TCGA-IM-A41Z   | 37 | FEMALE | WHITE | T1 | N0 | NA | I   | NA | NA | NA | YES | No | Hormone Therapy | 0 | 946  | 0 | 946  | 0  | 946  | 0 | 946  | C2 | NDUFB3 <sup>High</sup> |
| TCGA-J8-A3NZ   | 52 | FEMALE | WHITE | T3 | N1 | M0 | III | NA | NA | NA | NA  | No | NA              | 0 | 524  | 0 | 524  | 0  | 524  | 0 | 524  | C2 | NDUFB3 <sup>High</sup> |
| TCGA-J8-A3O0   | 38 | MALE   | WHITE | T2 | N0 | M0 | I   | NA | NA | NA | NA  | No | NA              | 0 | 1313 | 0 | 1313 | 0  | 1313 | 0 | 1313 | C2 | NDUFB3 <sup>High</sup> |
| TCGA-J8-A3O1   | 33 | FEMALE | WHITE | T3 | N1 | M0 | I   | NA | NA | NA | NA  | No | NA              | 0 | 827  | 0 | 827  | 0  | 827  | 0 | 827  | C2 | NDUFB3 <sup>High</sup> |
| TCGA-J8-A3O21  | 39 | MALE   | WHITE | T3 | N1 | M0 | I   | NA | NA | NA | NA  | No | NA              | 0 | 342  | 0 | 342  | NA | NA   | 0 | 342  | C2 | NDUFB3 <sup>High</sup> |
| TCGA-J8-A3YD   | 47 | FEMALE | WHITE | T1 | N1 | M0 | III | NA | NA | NA | YES | No | NA              | 0 | 968  | 0 | 968  | 0  | 968  | 0 | 968  | C2 | NDUFB3 <sup>High</sup> |
| TCGA-J8-A3YE   | 31 | FEMALE | WHITE | T3 | N1 | M0 | I   | NA | NA | NA | YES | No | NA              | 0 | 847  | 0 | 847  | 0  | 847  | 0 | 847  | C2 | NDUFB3 <sup>High</sup> |
| TCGA-J8-A3YF   | 83 | MALE   | WHITE | T1 | N1 | M0 | III | NA | NA | NA | YES | No | NA              | 0 | 751  | 0 | 751  | 0  | 751  | 0 | 751  | C2 | NDUFB3 <sup>High</sup> |
| TCGA-J8-A3YH.1 | 39 | MALE   | WHITE | T3 | N1 | M0 | I   | NA | NA | NA | YES | No | NA              | 0 | 175  | 0 | 175  | 0  | 175  | 0 | 175  | C2 | NDUFB3 <sup>High</sup> |
| TCGA-J8-A42S   | 45 | MALE   | WHITE | T1 | N1 | NA | III | NA | NA | NA | NO  | No | NA              | 0 | 75   | 0 | 75   | 0  | 75   | 0 | 75   | C2 | NDUFB3 <sup>High</sup> |
| TCGA-J8-A4HW1  | 59 | FEMALE | WHITE | T2 | N1 | M0 | III | NA | NA | NA | YES | No | NA              | 0 | 79   | 0 | 79   | 0  | 79   | 0 | 79   | C2 | NDUFB3 <sup>High</sup> |
| TCGA-J8-A4HY   | 68 | FEMALE | WHITE | T4 | N1 | NA | IV  | NA | NA | NA | NO  | No | NA              | 0 | 6    | 0 | 6    | NA | NA   | 0 | 6    | C2 | NDUFB3 <sup>High</sup> |
| TCGA-KS-A41J   | 28 | FEMALE | WHITE | T2 | N1 | M0 | I   | NA | NA | NA | YES | No | Hormone Therapy | 0 | 477  | 0 | 477  | 0  | 477  | 0 | 477  | C2 | NDUFB3 <sup>High</sup> |
| TCGA-KS-A4I7   | 61 | FEMALE | WHITE | T1 | N0 | M0 | I   | NA | NA | NA | YES | No | Hormone Therapy | 0 | 987  | 0 | 987  | 0  | 987  | 0 | 987  | C2 | NDUFB3 <sup>High</sup> |
| TCGA-L6-A4EP   | 41 | FEMALE | ASIAN | T2 | N0 | M0 | I   | NA | NA | NA | YES | No | NA              | 0 | 1016 | 0 | 1016 | 0  | 1016 | 0 | 1016 | C2 | NDUFB3 <sup>High</sup> |
| TCGA-L6-A4ET   | 49 | FEMALE | WHITE | T3 | NA | M1 | IV  | NA | NA | NA | YES | No | NA              | 0 | 664  | 0 | 664  | NA | NA   | 0 | 664  | C2 | NDUFB3 <sup>High</sup> |
| TCGA-MK-A84Z   | 74 | MALE   | BLACK | T3 | NA | NA | III | NA | NA | NA | NO  | No | NA              | 0 | 728  | 0 | 728  | NA | NA   | 0 | 728  | C2 | NDUFB3 <sup>High</sup> |
| TCGA-QD-A8IV   | 50 | FEMALE | BLACK | T3 | N1 | NA | IV  | NA | NA | NA | NO  | No | NA              | 0 | 392  | 0 | 392  | NA | NA   | 0 | 392  | C2 | NDUFB3 <sup>High</sup> |
