# Supplementary material for: Clinical Relevance and Tumor Growth Suppression of Mitochondrial ROS Regulators along NADH:Ubiquinone Oxidoreductase Subunit B3 in Thyroid Cancer
Source: Hindawi journal article supplement (doi:10.1155/2022/8038857), 2022-01-01
Supplement: f2 [file 8038857.f2.zip]

| Genes    | p.value    | HR         | Low 95%CI  | High 95%CI  |
|----------|------------|------------|------------|-------------|
| NDUFB3   | 0.00110791 | 0.36293878 | 0.19739074 | 0.667328959 |
| COX7A2   | 0.00470963 | 0.43038684 | 0.23985321 | 0.772275802 |
| UQCR10   | 0.00775129 | 0.45192639 | 0.25186681 | 0.810894693 |
| NDUFA1   | 0.00839306 | 0.46177398 | 0.25995888 | 0.820265168 |
| DUOX2    | 0.00903735 | 0.47060493 | 0.26723901 | 0.82873005  |
| NDUFB1   | 0.01178286 | 0.48321153 | 0.27436737 | 0.85102462  |
| COX7B    | 0.01549202 | 0.49715568 | 0.28232458 | 0.875459651 |
| DUOXA1   | 0.02277827 | 0.52257009 | 0.29891464 | 0.913570171 |
| DUOX1    | 0.02481018 | 0.52746053 | 0.30170416 | 0.922143759 |
| COX8A    | 0.03157644 | 0.54191112 | 0.30998712 | 0.947354402 |
| NDUFA8   | 0.03509952 | 0.5483565  | 0.31358796 | 0.958885215 |
| DUOXA2   | 0.0454468  | 0.56897966 | 0.32745784 | 0.988639804 |
| SURF1    | 0.05852521 | 0.5864667  | 0.33738752 | 1.019430684 |
| COX6C    | 0.06778146 | 0.59754426 | 0.34386951 | 1.038356525 |
| ETFB     | 0.07867168 | 0.61198486 | 0.35403142 | 1.057887654 |
| UQCC3    | 0.11057898 | 0.64276874 | 0.37348845 | 1.106196582 |
| NDUFA2   | 0.16255197 | 0.67919733 | 0.39464982 | 1.168907184 |
| UQCRQ    | 0.17255846 | 0.68532445 | 0.39819576 | 1.179494258 |
| SCO1     | 0.18297226 | 0.69144251 | 0.40170355 | 1.1901631   |
| PDC      | 0.18857156 | 1.43623359 | 0.83724702 | 2.463749492 |
| NDUFB7   | 0.18981799 | 0.69524234 | 0.40378368 | 1.197081362 |
| UCP2     | 0.19739064 | 0.69973175 | 0.40658299 | 1.204242489 |
| DLAT     | 0.20560668 | 0.70575421 | 0.41143123 | 1.210625198 |
| COX6B1   | 0.23080612 | 0.7189079  | 0.41902713 | 1.233401195 |
| NDUFB2   | 0.24765991 | 0.72568822 | 0.42137283 | 1.249780135 |
| COX5A    | 0.27734777 | 0.741503   | 0.43227743 | 1.271930183 |
| NOX4     | 0.30073453 | 0.75298005 | 0.43996537 | 1.288689965 |
| COX15    | 0.36472174 | 0.78012237 | 0.45601677 | 1.334580112 |
| CYC1     | 0.48672809 | 0.8265192  | 0.48314094 | 1.413943481 |
| ATP6V1E1 | 0.62095231 | 0.87374321 | 0.5117496  | 1.491798323 |
| NDUFB10  | 0.66956346 | 0.8902648  | 0.52200066 | 1.518334108 |
| ROMO1    | 0.75732812 | 0.91926033 | 0.53892119 | 1.568020646 |
| SUCLG2   | 0.833488   | 1.05892    | 0.62096262 | 1.805763365 |
| SLC25A5  | 0.95595166 | 1.01515149 | 0.59537039 | 1.730909976 |
| SOD2     | 0.99090975 | 0.99690274 | 0.58464579 | 1.69985842  |
