# Supplementary material for: Clinical Relevance and Tumor Growth Suppression of Mitochondrial ROS Regulators along NADH:Ubiquinone Oxidoreductase Subunit B3 in Thyroid Cancer
Source: Hindawi journal article supplement (doi:10.1155/2022/8038857), 2022-01-01
Supplement: f2 [file 8038857.f2.zip]

| User ID | Score    | Gene Symbol | Gene Name                                                | Entrez Gene ID        |
|---------|----------|-------------|----------------------------------------------------------|-----------------------|
| NDUFB3  | 179.3918 | NDUFB3      | NADH:ubiquinone oxidoreductase subunit B3                | <a href="#">4709</a>  |
| ATP5PF  | 129.0456 | ATP5PF      | ATP synthase peripheral stalk subunit F6                 | <a href="#">522</a>   |
| NDUFB6  | 126.7139 | NDUFB6      | NADH:ubiquinone oxidoreductase subunit B6                | <a href="#">4712</a>  |
| NDUFA12 | 120.2904 | NDUFA12     | NADH:ubiquinone oxidoreductase subunit A12               | <a href="#">55967</a> |
| COX7A2  | 113.3525 | COX7A2      | cytochrome c oxidase subunit 7A2                         | <a href="#">1347</a>  |
| NDUFB2  | 107.1703 | NDUFB2      | NADH:ubiquinone oxidoreductase subunit B2                | <a href="#">4708</a>  |
| ATP5MC3 | 101.7195 | ATP5MC3     | ATP synthase membrane subunit c locus 3                  | <a href="#">518</a>   |
| NDUFA8  | 99.311   | NDUFA8      | NADH:ubiquinone oxidoreductase subunit A8                | <a href="#">4702</a>  |
| UQCRH   | 98.6369  | UQCRH       | ubiquinol-cytochrome c reductase hinge protein           | <a href="#">7388</a>  |
| ATP5F1C | 98.3918  | ATP5F1C     | ATP synthase F1 subunit gamma                            | <a href="#">509</a>   |
| ATP5PD  | 97.9057  | ATP5PD      | ATP synthase peripheral stalk subunit d                  | <a href="#">10476</a> |
| COX7B   | 94.7072  | COX7B       | cytochrome c oxidase subunit 7B                          | <a href="#">1349</a>  |
| ATP5MC1 | 93.2733  | ATP5MC1     | ATP synthase membrane subunit c locus 1                  | <a href="#">516</a>   |
| ATP5MG  | 93.2615  | ATP5MG      | ATP synthase membrane subunit g                          | <a href="#">10632</a> |
| NDUFA1  | 93.1269  | NDUFA1      | NADH:ubiquinone oxidoreductase subunit A1                | <a href="#">4694</a>  |
| COX8A   | 92.0201  | COX8A       | cytochrome c oxidase subunit 8A                          | <a href="#">1351</a>  |
| COX6C   | 91.9781  | COX6C       | cytochrome c oxidase subunit 6C                          | <a href="#">1345</a>  |
| NDUFS3  | 87.7395  | NDUFS3      | NADH:ubiquinone oxidoreductase core subunit S3           | <a href="#">4722</a>  |
| NDUFA6  | 85.5989  | NDUFA6      | NADH:ubiquinone oxidoreductase subunit A6                | <a href="#">4700</a>  |
| UQCR10  | 83.8508  | UQCR10      | ubiquinol-cytochrome c reductase, complex III subunit X  | <a href="#">29796</a> |
| NDUFB5  | 82.7434  | NDUFB5      | NADH:ubiquinone oxidoreductase subunit B5                | <a href="#">4711</a>  |
| CYC1    | 81.2944  | CYC1        | cytochrome c1                                            | <a href="#">1537</a>  |
| COX5A   | 80.5208  | COX5A       | cytochrome c oxidase subunit 5A                          | <a href="#">9377</a>  |
| ATP5F1E | 78.9978  | ATP5F1E     | ATP synthase F1 subunit epsilon                          | <a href="#">514</a>   |
| NDUFC1  | 78.845   | NDUFC1      | NADH:ubiquinone oxidoreductase subunit C1                | <a href="#">4717</a>  |
| NDUFB1  | 77.0647  | NDUFB1      | NADH:ubiquinone oxidoreductase subunit B1                | <a href="#">4707</a>  |
| COX7C   | 76.794   | COX7C       | cytochrome c oxidase subunit 7C                          | <a href="#">1350</a>  |
| ATP5PO  | 76.6956  | ATP5PO      | ATP synthase peripheral stalk subunit OSCP               | <a href="#">539</a>   |
| NDUFA5  | 76.6682  | NDUFA5      | NADH:ubiquinone oxidoreductase subunit A5                | <a href="#">4698</a>  |
| UQCRQ   | 76.4465  | UQCRQ       | ubiquinol-cytochrome c reductase complex III subunit VII | <a href="#">27089</a> |
| ATP5PB  | 76.3743  | ATP5PB      | ATP synthase peripheral stalk-membrane subunit b         | <a href="#">515</a>   |
| NDUFC2  | 76.0013  | NDUFC2      | NADH:ubiquinone oxidoreductase subunit C2                | <a href="#">4718</a>  |
| NDUFA4  | 73.4072  | NDUFA4      | NDUFA4, mitochondrial complex associated                 | <a href="#">4697</a>  |
| COX6A1  | 72.9782  | COX6A1      | cytochrome c oxidase subunit 6A1                         | <a href="#">1337</a>  |
| NDUFS4  | 72.1132  | NDUFS4      | NADH:ubiquinone oxidoreductase subunit S4                | <a href="#">4724</a>  |
| NDUFB4  | 72.0865  | NDUFB4      | NADH:ubiquinone oxidoreductase subunit B4                | <a href="#">4710</a>  |
| ATP5MF  | 70.6501  | ATP5MF      | ATP synthase membrane subunit f                          | <a href="#">9551</a>  |

|          |         |          |                                                                       |                        |
|----------|---------|----------|-----------------------------------------------------------------------|------------------------|
| COX17    | 70.4861 | COX17    | cytochrome c oxidase copper chaperone COX17                           | <a href="#">10063</a>  |
| UQCRB    | 66.6475 | UQCRB    | ubiquinol-cytochrome c reductase binding protein                      | <a href="#">7381</a>   |
| NDUFS2   | 66.476  | NDUFS2   | NADH:ubiquinone oxidoreductase core subunit S2                        | <a href="#">4720</a>   |
| ATP5ME   | 65.714  | ATP5ME   | ATP synthase membrane subunit e                                       | <a href="#">521</a>    |
| ATP5F1A  | 63.6938 | ATP5F1A  | ATP synthase F1 subunit alpha                                         | <a href="#">498</a>    |
| UQCR11   | 63.5823 | UQCR11   | ubiquinol-cytochrome c reductase, complex III subunit XI              | <a href="#">10975</a>  |
| NDUFAB1  | 60.482  | NDUFAB1  | NADH:ubiquinone oxidoreductase subunit AB1                            | <a href="#">4706</a>   |
| SDHD     | 59.8125 | SDHD     | succinate dehydrogenase complex subunit D                             | <a href="#">6392</a>   |
| SDHB     | 59.4534 | SDHB     | succinate dehydrogenase complex iron sulfur subunit B                 | <a href="#">6390</a>   |
| NDUFV3   | 59.406  | NDUFV3   | NADH:ubiquinone oxidoreductase subunit V3                             | <a href="#">4731</a>   |
| NDUFA10  | 58.0709 | NDUFA10  | NADH:ubiquinone oxidoreductase subunit A10                            | <a href="#">4705</a>   |
| COX4I1   | 56.5988 | COX4I1   | cytochrome c oxidase subunit 4I1                                      | <a href="#">1327</a>   |
| UQCRFS1  | 56.4965 | UQCRFS1  | ubiquinol-cytochrome c reductase, Rieske iron-sulfur polypeptide 1    | <a href="#">7386</a>   |
| ATP6V0B  | 55.7696 | ATP6V0B  | ATPase H+ transporting V0 subunit b                                   | <a href="#">533</a>    |
| NDUFA9   | 55.748  | NDUFA9   | NADH:ubiquinone oxidoreductase subunit A9                             | <a href="#">4704</a>   |
| NDUFS6   | 55.3265 | NDUFS6   | NADH:ubiquinone oxidoreductase subunit S6                             | <a href="#">4726</a>   |
| NDUFB11  | 54.2217 | NDUFB11  | NADH:ubiquinone oxidoreductase subunit B11                            | <a href="#">54539</a>  |
| NDUFA2   | 53.831  | NDUFA2   | NADH:ubiquinone oxidoreductase subunit A2                             | <a href="#">4695</a>   |
| ATP6V0E1 | 52.3143 | ATP6V0E1 | ATPase H+ transporting V0 subunit e1                                  | <a href="#">8992</a>   |
| COX5B    | 51.0715 | COX5B    | cytochrome c oxidase subunit 5B                                       | <a href="#">1329</a>   |
| ATP5F1B  | 50.9523 | ATP5F1B  | ATP synthase F1 subunit beta                                          | <a href="#">506</a>    |
| PPA2     | 48.321  | PPA2     | pyrophosphatase (inorganic) 2                                         | <a href="#">27068</a>  |
| NDUFB7   | 45.4367 | NDUFB7   | NADH:ubiquinone oxidoreductase subunit B7                             | <a href="#">4713</a>   |
| ATP6V1D  | 45.1474 | ATP6V1D  | ATPase H+ transporting V1 subunit D                                   | <a href="#">51382</a>  |
| NDUFB10  | 44.7972 | NDUFB10  | NADH:ubiquinone oxidoreductase subunit B10                            | <a href="#">4716</a>   |
| ATP6V0D1 | 44.1765 | ATP6V0D1 | ATPase H+ transporting V0 subunit d1                                  | <a href="#">9114</a>   |
| UQCRC1   | 43.8835 | UQCRC1   | ubiquinol-cytochrome c reductase core protein 1                       | <a href="#">7384</a>   |
| ATP6V1G2 | 43.0584 | ATP6V1G2 | ATPase H+ transporting V1 subunit G2                                  | <a href="#">534</a>    |
| ATP5MC2  | 42.9193 | ATP5MC2  | ATP synthase membrane subunit c locus 2                               | <a href="#">517</a>    |
| UQCRHL   | 42.7714 | UQCRHL   | ubiquinol-cytochrome c reductase hinge protein like                   | <a href="#">440567</a> |
| NDUFB9   | 42.4705 | NDUFB9   | NADH:ubiquinone oxidoreductase subunit B9                             | <a href="#">4715</a>   |
| NDUFV1   | 41.7466 | NDUFV1   | NADH:ubiquinone oxidoreductase core subunit V1                        | <a href="#">4723</a>   |
| ATP6V1H  | 40.6885 | ATP6V1H  | ATPase H+ transporting V1 subunit H                                   | <a href="#">51606</a>  |
| COX6B1   | 40.5669 | COX6B1   | cytochrome c oxidase subunit 6B1                                      | <a href="#">1340</a>   |
| ATP6V0E2 | 40.1169 | ATP6V0E2 | ATPase H+ transporting V0 subunit e2                                  | <a href="#">155066</a> |
| LHPP     | 38.9279 | LHPP     | phospholysine phosphohistidine inorganic pyrophosphate phosphatase    | <a href="#">64077</a>  |
| UQCRC2   | 38.7465 | UQCRC2   | ubiquinol-cytochrome c reductase core protein 2                       | <a href="#">7385</a>   |
| COX10    | 38.3561 | COX10    | cytochrome c oxidase assembly factor heme A:farnesyltransferase COX10 | <a href="#">1352</a>   |

|         |         |         |                                                |               |
|---------|---------|---------|------------------------------------------------|---------------|
| NDUFS7  | 37.7786 | NDUFS7  | NADH:ubiquinone oxidoreductase core subunit S7 | <u>374291</u> |
| COX7A2L | 35.5097 | COX7A2L | cytochrome c oxidase subunit 7A2 like          | <u>9167</u>   |
| NDUFV2  | 33.3902 | NDUFV2  | NADH:ubiquinone oxidoreductase core subunit V2 | <u>4729</u>   |
| NDUFB8  | 32.9587 | NDUFB8  | NADH:ubiquinone oxidoreductase subunit B8      | <u>4714</u>   |
| NDUFA3  | 32.4565 | NDUFA3  | NADH:ubiquinone oxidoreductase subunit A3      | <u>4696</u>   |
