# Supplementary material for: Clinical Relevance and Tumor Growth Suppression of Mitochondrial ROS Regulators along NADH:Ubiquinone Oxidoreductase Subunit B3 in Thyroid Cancer
Source: Hindawi journal article supplement (doi:10.1155/2022/8038857), 2022-01-01
Supplement: f2 [file 8038857.f2.zip]

| Gene     | Entry  | Entry name  | Protein names                          | Pubmed_ID      |
|----------|--------|-------------|----------------------------------------|----------------|
| ATP6V1E1 | P36543 | VATE1_HUMAN | V-type proton ATPase subunit E 1       | PMID: 25704631 |
| COX15    | Q7KZN9 | COX15_HUMAN | Cytochrome c oxidase assembly prote... | PMID: 25704631 |
| COX5A    | P20674 | COX5A_HUMAN | Cytochrome c oxidase subunit 5A, mi... | PMID: 25704631 |
| COX6B1   | P14854 | CX6B1_HUMAN | Cytochrome c oxidase subunit 6B1       | PMID: 25704631 |
| COX6C    | P09669 | COX6C_HUMAN | Cytochrome c oxidase subunit 6C        | PMID: 25704631 |
| COX7A2   | P14406 | CX7A2_HUMAN | Cytochrome c oxidase subunit 7A2, m... | PMID: 25704631 |
| COX7b    | P24311 | COX7B_HUMAN | Cytochrome c oxidase subunit 7B, mi... | PMID: 25704631 |
| COX8A    | P10176 | COX8A_HUMAN | Cytochrome c oxidase subunit 8A, mi... | PMID: 25704631 |
| CYC1     | P08574 | CY1_HUMAN   | Cytochrome c1, heme protein, mitoch... | PMID: 25704631 |
| DLAT     | P10515 | ODP2_HUMAN  | Dihydrolipoyllysine-residue acetyl...  | PMID: 25704631 |
| DUOX1    | Q9NRD9 | DUOX1_HUMAN | Dual oxidase 1                         | PMID: 30367082 |
| DUOX2    | Q9NRD8 | DUOX2_HUMAN | Dual oxidase 2                         | PMID: 30367082 |
| DUOXA1   | Q1HG43 | DOXA1_HUMAN | Dual oxidase maturation factor 1       | PMID: 30367082 |
| DUOXA2   | Q1HG44 | DOXA2_HUMAN | Dual oxidase maturation factor 2       | PMID: 30367082 |
| ETFB     | P38117 | ETFB_HUMAN  | Electron transfer flavoprotein subu... | PMID: 25704631 |
| NDUFA1   | O15239 | NDUA1_HUMAN | NADH dehydrogenase [ubiquinone] 1 a... | PMID: 25704631 |
| NDUFA2   | O43678 | NDUA2_HUMAN | NADH dehydrogenase [ubiquinone] 1 a... | PMID: 25704631 |
| NDUFA8   | P51970 | NDUA8_HUMAN | NADH dehydrogenase [ubiquinone] 1 a... | PMID: 25704631 |
| NDUFB1   | O75438 | NDUB1_HUMAN | NADH dehydrogenase [ubiquinone] 1 b... | PMID: 25704631 |
| NDUFB10  | O96000 | NDUBA_HUMAN | NADH dehydrogenase [ubiquinone] 1 b... | PMID: 25704631 |
| NDUFB2   | O95178 | NDUB2_HUMAN | NADH dehydrogenase [ubiquinone] 1 b... | PMID: 25704631 |
| NDUFB3   | O43676 | NDUB3_HUMAN | NADH dehydrogenase [ubiquinone] 1 b... | PMID: 25704631 |
| NDUFB7   | P17568 | NDUB7_HUMAN | NADH dehydrogenase [ubiquinone] 1 b... | PMID: 25704631 |
| NOX4     | Q9NPH5 | NOX4_HUMAN  | NADPH oxidase 4                        | PMID: 30367082 |
| PDC      | P20941 | PHOS_HUMAN  | Phosducin                              | PMID: 25704631 |
| ROMO1    | P60602 | ROMO1_HUMAN | Reactive oxygen species modulator 1    | PMID:32825500  |
| SCO1     | O75880 | SCO1_HUMAN  | Protein SCO1 homolog, mitochondrial    | PMID: 25704631 |
| SLC25A5  | P05141 | ADT2_HUMAN  | ADP/ATP translocase 2                  | PMID: 25704631 |
| SOD2     | P04179 | SODM_HUMAN  | Superoxide dismutase [Mn], mitochon... | PMID: 28445781 |
| SUCLG2   | Q96I99 | SUCB2_HUMAN | Succinate--CoA ligase [GDP-forming]... | PMID: 25704631 |
| SURF1    | Q15526 | SURF1_HUMAN | Surfeit locus protein 1                | PMID: 25704631 |
| UCP2     | P55851 | UCP2_HUMAN  | Mitochondrial uncoupling protein 2     | PMID: 25704631 |
| UQCC3    | Q6UW78 | UQCC3_HUMAN | Ubiquinol-cytochrome-c reductase co... | PMID: 33147459 |
| UQCR10   | Q9UDW1 | QCR9_HUMAN  | Cytochrome b-c1 complex subunit 9      | PMID: 25704631 |
| UQCRQ    | O14949 | QCR8_HUMAN  | Cytochrome b-c1 complex subunit 8      | PMID: 25704631 |
