# Supplementary material for: Clinical Relevance and Tumor Growth Suppression of Mitochondrial ROS Regulators along NADH:Ubiquinone Oxidoreductase Subunit B3 in Thyroid Cancer
Source: Hindawi journal article supplement (doi:10.1155/2022/8038857), 2022-01-01
Supplement: f2 [file 8038857.f2.zip]

| TCGA_ID         | Cluster |
|-----------------|---------|
| TCGA-DE-A4MD-06 | C1      |
| TCGA-EM-A2CS-06 | C2      |
| TCGA-EM-A2P1-06 | C1      |
| TCGA-EM-A3FQ-06 | C3      |
| TCGA-EM-A3SU-06 | C1      |
| TCGA-J8-A3O2-06 | C2      |
| TCGA-J8-A3YH-06 | C2      |
| TCGA-J8-A4HW-06 | C2      |
| TCGA-4C-A93U-01 | C1      |
| TCGA-BJ-A0YZ-01 | C3      |
| TCGA-BJ-A0Z0-01 | C2      |
| TCGA-BJ-A0Z2-01 | C2      |
| TCGA-BJ-A0Z3-01 | C2      |
| TCGA-BJ-A0Z5-01 | C1      |
| TCGA-BJ-A0Z9-01 | C1      |
| TCGA-BJ-A0ZA-01 | C2      |
| TCGA-BJ-A0ZB-01 | C1      |
| TCGA-BJ-A0ZC-01 | C2      |
| TCGA-BJ-A0ZE-01 | C2      |
| TCGA-BJ-A0ZF-01 | C3      |
| TCGA-BJ-A0ZG-01 | C2      |
| TCGA-BJ-A0ZH-01 | C1      |
| TCGA-BJ-A0ZJ-01 | C2      |
| TCGA-BJ-A18Y-01 | C2      |
| TCGA-BJ-A18Z-01 | C1      |
| TCGA-BJ-A190-01 | C2      |
| TCGA-BJ-A191-01 | C2      |
| TCGA-BJ-A192-01 | C3      |
| TCGA-BJ-A28R-01 | C1      |
| TCGA-BJ-A28S-01 | C2      |
| TCGA-BJ-A28T-01 | C1      |
| TCGA-BJ-A28V-01 | C3      |
| TCGA-BJ-A28W-01 | C3      |
| TCGA-BJ-A28X-01 | C1      |
| TCGA-BJ-A28Z-01 | C1      |
| TCGA-BJ-A290-01 | C2      |
| TCGA-BJ-A291-01 | C3      |
| TCGA-BJ-A2N7-01 | C2      |
| TCGA-BJ-A2N8-01 | C3      |

|                 |    |
|-----------------|----|
| TCGA-BJ-A2N9-01 | C3 |
| TCGA-BJ-A2NA-01 | C1 |
| TCGA-BJ-A2P4-01 | C3 |
| TCGA-BJ-A3EZ-01 | C1 |
| TCGA-BJ-A3F0-01 | C3 |
| TCGA-BJ-A3PR-01 | C1 |
| TCGA-BJ-A3PT-01 | C3 |
| TCGA-BJ-A3PU-01 | C3 |
| TCGA-BJ-A45C-01 | C2 |
| TCGA-BJ-A45D-01 | C3 |
| TCGA-BJ-A45E-01 | C1 |
| TCGA-BJ-A45F-01 | C2 |
| TCGA-BJ-A45G-01 | C2 |
| TCGA-BJ-A45H-01 | C2 |
| TCGA-BJ-A45I-01 | C1 |
| TCGA-BJ-A45J-01 | C2 |
| TCGA-BJ-A45K-01 | C3 |
| TCGA-BJ-A4O8-01 | C1 |
| TCGA-BJ-A4O9-01 | C2 |
| TCGA-CE-A13K-01 | C2 |
| TCGA-CE-A27D-01 | C2 |
| TCGA-CE-A3MD-01 | C3 |
| TCGA-CE-A3ME-01 | C2 |
| TCGA-CE-A481-01 | C2 |
| TCGA-CE-A482-01 | C2 |
| TCGA-CE-A483-01 | C2 |
| TCGA-CE-A484-01 | C3 |
| TCGA-CE-A485-01 | C2 |
| TCGA-DE-A0XZ-01 | C2 |
| TCGA-DE-A0Y2-01 | C1 |
| TCGA-DE-A0Y3-01 | C1 |
| TCGA-DE-A2OL-01 | C3 |
| TCGA-DE-A3KN-01 | C2 |
| TCGA-DE-A4M8-01 | C1 |
| TCGA-DE-A4M9-01 | C2 |
| TCGA-DE-A4MA-01 | C3 |
| TCGA-DE-A4MB-01 | C1 |
| TCGA-DE-A4MC-01 | C1 |
| TCGA-DE-A4MD-01 | C1 |
| TCGA-DE-A69J-01 | C2 |

|                 |    |
|-----------------|----|
| TCGA-DE-A69K-01 | C2 |
| TCGA-DE-A7U5-01 | C1 |
| TCGA-DJ-A13L-01 | C1 |
| TCGA-DJ-A13M-01 | C3 |
| TCGA-DJ-A13O-01 | C2 |
| TCGA-DJ-A13P-01 | C2 |
| TCGA-DJ-A13R-01 | C1 |
| TCGA-DJ-A13S-01 | C2 |
| TCGA-DJ-A13T-01 | C2 |
| TCGA-DJ-A13U-01 | C1 |
| TCGA-DJ-A13V-01 | C2 |
| TCGA-DJ-A13W-01 | C1 |
| TCGA-DJ-A13X-01 | C2 |
| TCGA-DJ-A1QD-01 | C1 |
| TCGA-DJ-A1QE-01 | C1 |
| TCGA-DJ-A1QF-01 | C1 |
| TCGA-DJ-A1QG-01 | C1 |
| TCGA-DJ-A1QH-01 | C2 |
| TCGA-DJ-A1QI-01 | C2 |
| TCGA-DJ-A1QL-01 | C3 |
| TCGA-DJ-A1QM-01 | C2 |
| TCGA-DJ-A1QN-01 | C2 |
| TCGA-DJ-A1QO-01 | C1 |
| TCGA-DJ-A1QQ-01 | C1 |
| TCGA-DJ-A2PN-01 | C2 |
| TCGA-DJ-A2PO-01 | C1 |
| TCGA-DJ-A2PP-01 | C2 |
| TCGA-DJ-A2PQ-01 | C2 |
| TCGA-DJ-A2PR-01 | C1 |
| TCGA-DJ-A2PS-01 | C2 |
| TCGA-DJ-A2PT-01 | C3 |
| TCGA-DJ-A2PU-01 | C2 |
| TCGA-DJ-A2PV-01 | C1 |
| TCGA-DJ-A2PW-01 | C2 |
| TCGA-DJ-A2PX-01 | C2 |
| TCGA-DJ-A2PY-01 | C1 |
| TCGA-DJ-A2PZ-01 | C1 |
| TCGA-DJ-A2Q0-01 | C2 |
| TCGA-DJ-A2Q1-01 | C1 |
| TCGA-DJ-A2Q2-01 | C2 |

|                 |    |
|-----------------|----|
| TCGA-DJ-A2Q3-01 | C1 |
| TCGA-DJ-A2Q4-01 | C1 |
| TCGA-DJ-A2Q5-01 | C2 |
| TCGA-DJ-A2Q6-01 | C2 |
| TCGA-DJ-A2Q7-01 | C2 |
| TCGA-DJ-A2Q9-01 | C1 |
| TCGA-DJ-A2QA-01 | C3 |
| TCGA-DJ-A2QB-01 | C2 |
| TCGA-DJ-A2QC-01 | C3 |
| TCGA-DJ-A3UK-01 | C2 |
| TCGA-DJ-A3UM-01 | C2 |
| TCGA-DJ-A3UN-01 | C2 |
| TCGA-DJ-A3UO-01 | C2 |
| TCGA-DJ-A3UP-01 | C2 |
| TCGA-DJ-A3UQ-01 | C1 |
| TCGA-DJ-A3UR-01 | C2 |
| TCGA-DJ-A3US-01 | C2 |
| TCGA-DJ-A3UT-01 | C3 |
| TCGA-DJ-A3UU-01 | C2 |
| TCGA-DJ-A3UV-01 | C2 |
| TCGA-DJ-A3UW-01 | C1 |
| TCGA-DJ-A3UX-01 | C2 |
| TCGA-DJ-A3UY-01 | C1 |
| TCGA-DJ-A3UZ-01 | C2 |
| TCGA-DJ-A3V0-01 | C2 |
| TCGA-DJ-A3V2-01 | C2 |
| TCGA-DJ-A3V3-01 | C2 |
| TCGA-DJ-A3V4-01 | C2 |
| TCGA-DJ-A3V5-01 | C1 |
| TCGA-DJ-A3V6-01 | C1 |
| TCGA-DJ-A3V7-01 | C2 |
| TCGA-DJ-A3V8-01 | C2 |
| TCGA-DJ-A3V9-01 | C2 |
| TCGA-DJ-A3VA-01 | C2 |
| TCGA-DJ-A3VB-01 | C1 |
| TCGA-DJ-A3VD-01 | C1 |
| TCGA-DJ-A3VE-01 | C1 |
| TCGA-DJ-A3VF-01 | C1 |
| TCGA-DJ-A3VG-01 | C3 |
| TCGA-DJ-A3VI-01 | C1 |

|                 |    |
|-----------------|----|
| TCGA-DJ-A3VJ-01 | C2 |
| TCGA-DJ-A3VK-01 | C3 |
| TCGA-DJ-A3VL-01 | C3 |
| TCGA-DJ-A3VM-01 | C2 |
| TCGA-DJ-A4UL-01 | C3 |
| TCGA-DJ-A4UP-01 | C2 |
| TCGA-DJ-A4UQ-01 | C2 |
| TCGA-DJ-A4UR-01 | C2 |
| TCGA-DJ-A4UT-01 | C1 |
| TCGA-DJ-A4UW-01 | C2 |
| TCGA-DJ-A4V0-01 | C2 |
| TCGA-DJ-A4V2-01 | C1 |
| TCGA-DJ-A4V4-01 | C1 |
| TCGA-DJ-A4V5-01 | C2 |
| TCGA-DO-A1JZ-01 | C2 |
| TCGA-DO-A1K0-01 | C1 |
| TCGA-DO-A2HM-01 | C1 |
| TCGA-E3-A3DY-01 | C2 |
| TCGA-E3-A3DZ-01 | C2 |
| TCGA-E3-A3E0-01 | C2 |
| TCGA-E3-A3E1-01 | C2 |
| TCGA-E3-A3E2-01 | C2 |
| TCGA-E3-A3E3-01 | C2 |
| TCGA-E3-A3E5-01 | C2 |
| TCGA-E8-A242-01 | C1 |
| TCGA-E8-A2EA-01 | C1 |
| TCGA-E8-A2JQ-01 | C1 |
| TCGA-E8-A3X7-01 | C2 |
| TCGA-E8-A413-01 | C1 |
| TCGA-E8-A414-01 | C1 |
| TCGA-E8-A415-01 | C2 |
| TCGA-E8-A416-01 | C2 |
| TCGA-E8-A417-01 | C1 |
| TCGA-E8-A418-01 | C2 |
| TCGA-E8-A419-01 | C1 |
| TCGA-E8-A432-01 | C3 |
| TCGA-E8-A433-01 | C3 |
| TCGA-E8-A434-01 | C2 |
| TCGA-E8-A436-01 | C1 |
| TCGA-E8-A437-01 | C2 |

|                 |    |
|-----------------|----|
| TCGA-E8-A438-01 | C2 |
| TCGA-E8-A44K-01 | C1 |
| TCGA-E8-A44M-01 | C2 |
| TCGA-EL-A3CL-01 | C2 |
| TCGA-EL-A3CM-01 | C1 |
| TCGA-EL-A3CN-01 | C1 |
| TCGA-EL-A3CO-01 | C1 |
| TCGA-EL-A3CP-01 | C2 |
| TCGA-EL-A3CR-01 | C2 |
| TCGA-EL-A3CS-01 | C1 |
| TCGA-EL-A3CT-01 | C1 |
| TCGA-EL-A3CU-01 | C1 |
| TCGA-EL-A3CV-01 | C1 |
| TCGA-EL-A3CW-01 | C2 |
| TCGA-EL-A3CX-01 | C3 |
| TCGA-EL-A3CY-01 | C1 |
| TCGA-EL-A3CZ-01 | C2 |
| TCGA-EL-A3D0-01 | C1 |
| TCGA-EL-A3D1-01 | C3 |
| TCGA-EL-A3D4-01 | C3 |
| TCGA-EL-A3D5-01 | C2 |
| TCGA-EL-A3D6-01 | C1 |
| TCGA-EL-A3GO-01 | C1 |
| TCGA-EL-A3GP-01 | C1 |
| TCGA-EL-A3GQ-01 | C1 |
| TCGA-EL-A3GR-01 | C1 |
| TCGA-EL-A3GS-01 | C1 |
| TCGA-EL-A3GU-01 | C1 |
| TCGA-EL-A3GV-01 | C1 |
| TCGA-EL-A3GW-01 | C2 |
| TCGA-EL-A3GX-01 | C1 |
| TCGA-EL-A3GY-01 | C1 |
| TCGA-EL-A3GZ-01 | C2 |
| TCGA-EL-A3H1-01 | C3 |
| TCGA-EL-A3H2-01 | C3 |
| TCGA-EL-A3H3-01 | C2 |
| TCGA-EL-A3H4-01 | C1 |
| TCGA-EL-A3H5-01 | C1 |
| TCGA-EL-A3H7-01 | C1 |
| TCGA-EL-A3H8-01 | C2 |

|                 |    |
|-----------------|----|
| TCGA-EL-A3MW-01 | C2 |
| TCGA-EL-A3MX-01 | C2 |
| TCGA-EL-A3MY-01 | C1 |
| TCGA-EL-A3MZ-01 | C1 |
| TCGA-EL-A3N2-01 | C1 |
| TCGA-EL-A3N3-01 | C1 |
| TCGA-EL-A3T0-01 | C2 |
| TCGA-EL-A3T1-01 | C1 |
| TCGA-EL-A3T2-01 | C2 |
| TCGA-EL-A3T3-01 | C1 |
| TCGA-EL-A3T6-01 | C1 |
| TCGA-EL-A3T7-01 | C2 |
| TCGA-EL-A3T8-01 | C2 |
| TCGA-EL-A3T9-01 | C1 |
| TCGA-EL-A3TA-01 | C2 |
| TCGA-EL-A3TB-01 | C2 |
| TCGA-EL-A3ZG-01 | C2 |
| TCGA-EL-A3ZH-01 | C2 |
| TCGA-EL-A3ZK-01 | C1 |
| TCGA-EL-A3ZL-01 | C2 |
| TCGA-EL-A3ZM-01 | C3 |
| TCGA-EL-A3ZN-01 | C3 |
| TCGA-EL-A3ZO-01 | C1 |
| TCGA-EL-A3ZP-01 | C2 |
| TCGA-EL-A3ZQ-01 | C3 |
| TCGA-EL-A3ZR-01 | C3 |
| TCGA-EL-A3ZS-01 | C2 |
| TCGA-EL-A3ZT-01 | C1 |
| TCGA-EL-A4JV-01 | C2 |
| TCGA-EL-A4JW-01 | C1 |
| TCGA-EL-A4JX-01 | C1 |
| TCGA-EL-A4JZ-01 | C2 |
| TCGA-EL-A4K0-01 | C2 |
| TCGA-EL-A4K1-01 | C1 |
| TCGA-EL-A4K2-01 | C2 |
| TCGA-EL-A4K4-01 | C1 |
| TCGA-EL-A4K6-01 | C2 |
| TCGA-EL-A4K7-01 | C3 |
| TCGA-EL-A4K9-01 | C2 |
| TCGA-EL-A4KD-01 | C2 |

|                 |    |
|-----------------|----|
| TCGA-EL-A4KG-01 | C2 |
| TCGA-EL-A4KH-01 | C3 |
| TCGA-EL-A4KI-01 | C3 |
| TCGA-EM-A1CS-01 | C2 |
| TCGA-EM-A1CT-01 | C1 |
| TCGA-EM-A1CU-01 | C2 |
| TCGA-EM-A1CV-01 | C2 |
| TCGA-EM-A1CW-01 | C2 |
| TCGA-EM-A1YA-01 | C2 |
| TCGA-EM-A1YB-01 | C2 |
| TCGA-EM-A1YC-01 | C2 |
| TCGA-EM-A1YD-01 | C2 |
| TCGA-EM-A1YE-01 | C3 |
| TCGA-EM-A22I-01 | C1 |
| TCGA-EM-A22J-01 | C2 |
| TCGA-EM-A22K-01 | C2 |
| TCGA-EM-A22L-01 | C2 |
| TCGA-EM-A22M-01 | C1 |
| TCGA-EM-A22N-01 | C2 |
| TCGA-EM-A22O-01 | C2 |
| TCGA-EM-A22P-01 | C2 |
| TCGA-EM-A22Q-01 | C3 |
| TCGA-EM-A2CJ-01 | C2 |
| TCGA-EM-A2CK-01 | C2 |
| TCGA-EM-A2CL-01 | C2 |
| TCGA-EM-A2CM-01 | C2 |
| TCGA-EM-A2CN-01 | C2 |
| TCGA-EM-A2CO-01 | C2 |
| TCGA-EM-A2CP-01 | C1 |
| TCGA-EM-A2CQ-01 | C2 |
| TCGA-EM-A2CR-01 | C3 |
| TCGA-EM-A2CS-01 | C2 |
| TCGA-EM-A2CT-01 | C3 |
| TCGA-EM-A2CU-01 | C2 |
| TCGA-EM-A2OV-01 | C2 |
| TCGA-EM-A2OW-01 | C2 |
| TCGA-EM-A2OX-01 | C2 |
| TCGA-EM-A2OY-01 | C2 |
| TCGA-EM-A2OZ-01 | C2 |
| TCGA-EM-A2P0-01 | C2 |



|                 |    |
|-----------------|----|
| TCGA-EM-A2P1-01 | C1 |
| TCGA-EM-A2P2-01 | C2 |
| TCGA-EM-A2P3-01 | C2 |
| TCGA-EM-A3AI-01 | C3 |
| TCGA-EM-A3AJ-01 | C3 |
| TCGA-EM-A3AK-01 | C2 |
| TCGA-EM-A3AL-01 | C3 |
| TCGA-EM-A3AN-01 | C2 |
| TCGA-EM-A3AO-01 | C2 |
| TCGA-EM-A3AP-01 | C2 |
| TCGA-EM-A3AQ-01 | C3 |
| TCGA-EM-A3AR-01 | C2 |
| TCGA-EM-A3FJ-01 | C2 |
| TCGA-EM-A3FK-01 | C1 |
| TCGA-EM-A3FL-01 | C3 |
| TCGA-EM-A3FM-01 | C1 |
| TCGA-EM-A3FN-01 | C3 |
| TCGA-EM-A3FO-01 | C2 |
| TCGA-EM-A3FP-01 | C3 |
| TCGA-EM-A3FQ-01 | C2 |
| TCGA-EM-A3FR-01 | C2 |
| TCGA-EM-A3O3-01 | C1 |
| TCGA-EM-A3O6-01 | C3 |
| TCGA-EM-A3O7-01 | C2 |
| TCGA-EM-A3O8-01 | C2 |
| TCGA-EM-A3OA-01 | C3 |
| TCGA-EM-A3OB-01 | C3 |
| TCGA-EM-A3ST-01 | C3 |
| TCGA-EM-A3SU-01 | C3 |
| TCGA-EM-A3SX-01 | C2 |
| TCGA-EM-A3SY-01 | C2 |
| TCGA-EM-A3SZ-01 | C1 |
| TCGA-EM-A4FF-01 | C1 |
| TCGA-EM-A4FH-01 | C3 |
| TCGA-EM-A4FK-01 | C3 |
| TCGA-EM-A4FM-01 | C1 |
| TCGA-EM-A4FN-01 | C2 |
| TCGA-EM-A4FO-01 | C2 |
| TCGA-EM-A4FQ-01 | C1 |
| TCGA-EM-A4FR-01 | C2 |

|                 |    |
|-----------------|----|
| TCGA-EM-A4FU-01 | C2 |
| TCGA-EM-A4FV-01 | C2 |
| TCGA-EM-A4G1-01 | C2 |
| TCGA-ET-A25G-01 | C1 |
| TCGA-ET-A25I-01 | C2 |
| TCGA-ET-A25K-01 | C2 |
| TCGA-ET-A25L-01 | C1 |
| TCGA-ET-A25M-01 | C2 |
| TCGA-ET-A25N-01 | C1 |
| TCGA-ET-A25O-01 | C2 |
| TCGA-ET-A25P-01 | C2 |
| TCGA-ET-A25R-01 | C1 |
| TCGA-ET-A2MX-01 | C2 |
| TCGA-ET-A2MY-01 | C2 |
| TCGA-ET-A2MZ-01 | C2 |
| TCGA-ET-A2N0-01 | C3 |
| TCGA-ET-A2N3-01 | C3 |
| TCGA-ET-A2N4-01 | C2 |
| TCGA-ET-A2N5-01 | C3 |
| TCGA-ET-A39I-01 | C2 |
| TCGA-ET-A39J-01 | C2 |
| TCGA-ET-A39K-01 | C3 |
| TCGA-ET-A39L-01 | C2 |
| TCGA-ET-A39M-01 | C2 |
| TCGA-ET-A39N-01 | C3 |
| TCGA-ET-A39O-01 | C1 |
| TCGA-ET-A39P-01 | C2 |
| TCGA-ET-A39R-01 | C2 |
| TCGA-ET-A39S-01 | C2 |
| TCGA-ET-A39T-01 | C2 |
| TCGA-ET-A3BN-01 | C1 |
| TCGA-ET-A3BO-01 | C1 |
| TCGA-ET-A3BP-01 | C2 |
| TCGA-ET-A3BQ-01 | C2 |
| TCGA-ET-A3BS-01 | C1 |
| TCGA-ET-A3BT-01 | C2 |
| TCGA-ET-A3BU-01 | C2 |
| TCGA-ET-A3BV-01 | C1 |
| TCGA-ET-A3BW-01 | C2 |
| TCGA-ET-A3BX-01 | C1 |

|                 |    |
|-----------------|----|
| TCGA-ET-A3DO-01 | C1 |
| TCGA-ET-A3DP-01 | C2 |
| TCGA-ET-A3DQ-01 | C2 |
| TCGA-ET-A3DR-01 | C2 |
| TCGA-ET-A3DS-01 | C2 |
| TCGA-ET-A3DU-01 | C1 |
| TCGA-ET-A3DV-01 | C3 |
| TCGA-ET-A3DW-01 | C1 |
| TCGA-ET-A40P-01 | C3 |
| TCGA-ET-A40Q-01 | C1 |
| TCGA-ET-A40R-01 | C3 |
| TCGA-ET-A40S-01 | C2 |
| TCGA-ET-A40T-01 | C2 |
| TCGA-ET-A4KN-01 | C3 |
| TCGA-ET-A4KQ-01 | C2 |
| TCGA-FE-A22Z-01 | C1 |
| TCGA-FE-A230-01 | C1 |
| TCGA-FE-A231-01 | C2 |
| TCGA-FE-A232-01 | C2 |
| TCGA-FE-A233-01 | C1 |
| TCGA-FE-A234-01 | C1 |
| TCGA-FE-A235-01 | C3 |
| TCGA-FE-A236-01 | C2 |
| TCGA-FE-A237-01 | C2 |
| TCGA-FE-A238-01 | C2 |
| TCGA-FE-A239-01 | C3 |
| TCGA-FE-A23A-01 | C1 |
| TCGA-FE-A3PA-01 | C2 |
| TCGA-FE-A3PB-01 | C1 |
| TCGA-FE-A3PC-01 | C2 |
| TCGA-FE-A3PD-01 | C3 |
| TCGA-FK-A3S3-01 | C2 |
| TCGA-FK-A3SB-01 | C2 |
| TCGA-FK-A3SD-01 | C3 |
| TCGA-FK-A3SE-01 | C2 |
| TCGA-FK-A3SG-01 | C2 |
| TCGA-FK-A3SH-01 | C3 |
| TCGA-FK-A4UB-01 | C2 |
| TCGA-FY-A2QD-01 | C3 |
| TCGA-FY-A3BL-01 | C1 |

|                 |    |
|-----------------|----|
| TCGA-FY-A3I4-01 | C2 |
| TCGA-FY-A3I5-01 | C2 |
| TCGA-FY-A3NM-01 | C3 |
| TCGA-FY-A3NN-01 | C1 |
| TCGA-FY-A3NP-01 | C3 |
| TCGA-FY-A3ON-01 | C2 |
| TCGA-FY-A3R6-01 | C2 |
| TCGA-FY-A3R7-01 | C2 |
| TCGA-FY-A3R8-01 | C1 |
| TCGA-FY-A3R9-01 | C2 |
| TCGA-FY-A3RA-01 | C2 |
| TCGA-FY-A3TY-01 | C1 |
| TCGA-FY-A3W9-01 | C2 |
| TCGA-FY-A3WA-01 | C2 |
| TCGA-FY-A3YR-01 | C1 |
| TCGA-FY-A40K-01 | C2 |
| TCGA-FY-A40L-01 | C1 |
| TCGA-FY-A40M-01 | C2 |
| TCGA-FY-A40N-01 | C2 |
| TCGA-FY-A4B0-01 | C3 |
| TCGA-FY-A4B3-01 | C1 |
| TCGA-FY-A4B4-01 | C2 |
| TCGA-FY-A76V-01 | C2 |
| TCGA-GE-A2C6-01 | C2 |
| TCGA-H2-A26U-01 | C1 |
| TCGA-H2-A2K9-01 | C2 |
| TCGA-H2-A3RH-01 | C3 |
| TCGA-H2-A3RI-01 | C2 |
| TCGA-H2-A421-01 | C1 |
| TCGA-H2-A422-01 | C1 |
| TCGA-IM-A3EB-01 | C1 |
| TCGA-IM-A3ED-01 | C1 |
| TCGA-IM-A3U2-01 | C1 |
| TCGA-IM-A3U3-01 | C2 |
| TCGA-IM-A41Y-01 | C2 |
| TCGA-IM-A41Z-01 | C3 |
| TCGA-IM-A420-01 | C1 |
| TCGA-IM-A4EB-01 | C1 |
| TCGA-J8-A3NZ-01 | C2 |
| TCGA-J8-A3O0-01 | C2 |

|                 |    |
|-----------------|----|
| TCGA-J8-A3O1-01 | C1 |
| TCGA-J8-A3O2-01 | C2 |
| TCGA-J8-A3YD-01 | C2 |
| TCGA-J8-A3YE-01 | C2 |
| TCGA-J8-A3YF-01 | C1 |
| TCGA-J8-A3YG-01 | C1 |
| TCGA-J8-A3YH-01 | C2 |
| TCGA-J8-A42S-01 | C2 |
| TCGA-J8-A4HW-01 | C2 |
| TCGA-J8-A4HY-01 | C2 |
| TCGA-KS-A41F-01 | C3 |
| TCGA-KS-A41I-01 | C1 |
| TCGA-KS-A41J-01 | C3 |
| TCGA-KS-A41L-01 | C3 |
| TCGA-KS-A41I-01 | C3 |
| TCGA-KS-A4I3-01 | C2 |
| TCGA-KS-A4I5-01 | C2 |
| TCGA-KS-A4I7-01 | C2 |
| TCGA-KS-A4I9-01 | C1 |
| TCGA-KS-A4IB-01 | C1 |
| TCGA-KS-A4IC-01 | C2 |
| TCGA-KS-A4ID-01 | C1 |
| TCGA-L6-A4EP-01 | C3 |
| TCGA-L6-A4EQ-01 | C2 |
| TCGA-L6-A4ET-01 | C2 |
| TCGA-L6-A4EU-01 | C1 |
| TCGA-MK-A4N6-01 | C1 |
| TCGA-MK-A4N7-01 | C2 |
| TCGA-MK-A4N9-01 | C2 |
| TCGA-MK-A84Z-01 | C3 |
| TCGA-QD-A8IV-01 | C2 |
