# Supplementary material for: Clinical Relevance and Tumor Growth Suppression of Mitochondrial ROS Regulators along NADH:Ubiquinone Oxidoreductase Subunit B3 in Thyroid Cancer
Source: Hindawi journal article supplement (doi:10.1155/2022/8038857), 2022-01-01
Supplement: f2 [file 8038857.f2.zip]

| Gene Set | Description                                  | Size | Leading Edge Number | ES       | NES      | P Value | FDR        |
|----------|----------------------------------------------|------|---------------------|----------|----------|---------|------------|
| hsa00190 | Oxidative phosphorylation                    | 117  | 80                  | 0.83948  | 1.9163   | 0       | 0          |
| hsa05012 | Parkinson disease                            | 125  | 74                  | 0.81209  | 1.8594   | 0       | 0          |
| hsa05010 | Alzheimer disease                            | 160  | 74                  | 0.79204  | 1.8181   | 0       | 0          |
| hsa05016 | Huntington disease                           | 183  | 80                  | 0.76288  | 1.7599   | 0       | 0          |
| hsa04714 | Thermogenesis                                | 209  | 93                  | 0.75683  | 1.7496   | 0       | 0          |
| hsa04932 | Non-alcoholic fatty liver disease (NAFLD)    | 139  | 72                  | 0.75801  | 1.737    | 0       | 0          |
| hsa04672 | Intestinal immune network for IgA production | 44   | 44                  | -0.33246 | -2.4531  | 0       | 0          |
| hsa00620 | Pyruvate metabolism                          | 38   | 19                  | 0.76776  | 1.6875   | 0       | 0.00027933 |
| hsa03060 | Protein export                               | 23   | 14                  | 0.77657  | 1.6559   | 0       | 0.0010863  |
| hsa00860 | Porphyrin and chlorophyll metabolism         | 25   | 13                  | 0.76702  | 1.6314   | 0       | 0.0012221  |
| hsa00280 | Valine, leucine and isoleucine degradation   | 47   | 38                  | 0.74749  | 1.6581   | 0       | 0.0012221  |
| hsa05310 | Asthma                                       | 25   | 25                  | -0.33209 | -1.6275  | 0       | 0.25007    |
| hsa00591 | Linoleic acid metabolism                     | 27   | 14                  | -0.26293 | -1.1196  | 0.28571 | 0.76754    |
| hsa04940 | Type I diabetes mellitus                     | 38   | 38                  | -0.17979 | -1.0323  | 0.2     | 0.8031     |
| hsa04742 | Taste transduction                           | 58   | 23                  | -0.14344 | -1.1227  | 0       | 1          |
| hsa05330 | Allograft rejection                          | 34   | 33                  | -0.22172 | -0.90238 | 0.6     | 1          |
| hsa01523 | Antifolate resistance                        | 31   | 31                  | -0.1624  | -0.80932 | 0.71429 | 1          |
| hsa03450 | Non-homologous end-joining                   | 13   | 13                  | -0.21565 | -0.6944  | 0.82857 | 1          |
